# Supplementary material for: Decapping factor Dcp2 controls mRNA abundance and translation to adjust metabolism and filamentation to nutrient availability
Source: eLife journal article supplement (doi:10.7554/elife.85545), 2023-06-02
Supplement: fig1-data1 [file Figure 1 – source data 1.xlsx]

## Sheet: RNA-Seq_dcp2 vs WT
gene_ID	log2FC mRNA	padj
YAL067C	-0.702002	0.00323887
YAL063C-A	-0.760124	0.122312
YAL063C	1.74038	2.74351e-33
YAL054C	1.57042	3.23568e-13
YAL049C	-0.144379	0.158127
YAL047C	0.493592	0.000446891
YAL046C	-0.384274	0.00262886
YAL044C	0.153004	0.148791
YAL043C	-0.0509647	0.572581
YAL040C	0.393672	1.96591e-05
YAL039C	-0.296999	0.00228166
YAL036C	-0.601027	8.74685e-12
YAL034C	0.749346	4.39586e-07
YAL032C	-0.174441	0.226263
YAL031C	0.182579	0.218917
YAL029C	-0.086229	0.399721
YAL026C-A	-0.52015	0.0282505
YAL026C	-0.285857	0.000556168
YAL025C	-0.498954	3.32651e-07
YAL024C	-0.623952	6.78854e-08
YAL023C	-1.06008	8.50273e-55
YAL022C	-0.064711	0.516432
YAL021C	-0.594234	3.53148e-13
YAL020C	0.310932	0.0258259
YAL015C	0.750783	1.31559e-08
YAL014C	0.119779	0.339866
YAL010C	0.439425	0.00169658
YAL007C	-0.98375	2.58434e-33
YAL005C	-0.316168	4.80943e-06
YAL001C	0.471309	7.61847e-06
YAR002C-A	-0.741115	2.67335e-17
YAR007C	-0.228556	0.00459468
YAR014C	-0.12288	0.19201
YAR018C	0.441316	0.000283742
YAR019C	0.238165	0.0858325
YAR023C	1.42703	6.20941e-07
YAL064W-B	-0.513488	0.095631
YAL062W	0.802451	1.71658e-05
YAL061W	2.90986	2.05889e-59
YAL060W	0.622514	9.86483e-12
YAL059W	-0.51384	1.31768e-05
YAL058W	0.0813726	0.52739
YAL056W	-0.0286021	0.798157
YAL055W	0.482795	0.0202496
YAL053W	0.882527	3.29707e-33
YAL051W	0.399316	0.00012155
YAL044W-A	0.0259007	0.851001
YAL042W	-0.69393	2.12848e-21
YAL041W	-0.139474	0.174708
YAL038W	-1.16012	3.61739e-48
YAL037W	1.06464	0.0127361
YAL035W	-0.654648	2.10543e-22
YAL034W-A	-0.543725	0.00158331
YAL033W	-0.000581864	0.996623
YAL030W	-0.785722	3.22206e-08
YAL028W	1.76128	3.29114e-16
YAL027W	0.534482	0.00607745
YAL019W	-0.211203	0.0154289
YAL017W	0.837259	1.21116e-18
YAL016W	-0.146024	0.0466749
YAL013W	-0.338917	0.00456345
YAL012W	-0.870742	1.45924e-30
YAL011W	0.248107	0.107581
YAL009W	0.0680904	0.699564
YAL008W	-0.0360928	0.829967
YAL004W	-10.7475	8.4345e-13
YAL003W	-1.38878	4.6921e-85
YAL002W	0.784642	8.74685e-12
YAR002W	-0.680817	1.76525e-11
YAR003W	-0.70987	1.08863e-08
YAR008W	-0.304148	0.0383097
YAR015W	0.385651	4.55204e-05
YAR019W-A	-3.58134	5.22577e-08
YAR027W	0.697506	1.32289e-10
YAR028W	0.355027	0.0124978
YAR029W	-1.1905	0.0109617
YAR031W	0.367567	0.0464996
YAR033W	0.557571	0.0037121
YAR035W	0.896469	0.000230317
YAR042W	0.304124	0.00165826
YAR050W	1.65332	1.79169e-25
YAR071W	-2.65653	2.46464e-289
YBL113C	0.809305	1.50112e-21
YBL107C	-0.249276	0.0770349
YBL106C	0.729152	4.60446e-07
YBL105C	0.0723536	0.510997
YBL104C	0.0899255	0.456004
YBL103C	0.246936	0.052335
YBL101C	-0.0831513	0.458231
YBL093C	-0.599228	3.96875e-07
YBL091C-A	0.777746	1.43477e-05
YBL091C	-0.238213	0.00390526
YBL088C	1.02795	4.10707e-28
YBL087C	-1.27312	4.93771e-70
YBL086C	0.177751	0.239732
YBL084C	0.0524026	0.719148
YBL080C	0.81798	1.67223e-07
YBL078C	0.964726	2.18898e-10
YBL076C	-0.659775	1.63171e-22
YBL075C	1.6676	3.24703e-35
YBL074C	1.54138	1.94839e-23
YBL072C	-1.14426	1.13719e-61
YBL070C	-4.53516	0.000675787
YBL067C	-1.02026	1.14107e-25
YBL066C	0.135419	0.227119
YBL064C	2.08252	1.00498e-103
YBL061C	-0.259277	0.00304813
YBL059C-A	-0.160339	0.242609
YBL057C	-0.550691	8.92343e-07
YBL055C	-0.541462	1.15506e-06
YBL052C	-0.0831535	0.558111
YBL051C	-0.354737	1.89321e-05
YBL047C	-0.425791	1.47194e-09
YBL045C	0.178594	0.0153661
YBL042C	0.149206	0.056946
YBL040C	0.15608	0.131726
YBL039C	-0.759844	9.25639e-27
YBL036C	-0.586388	2.03759e-10
YBL035C	-0.157619	0.108921
YBL034C	-0.406273	9.75742e-05
YBL033C	0.231636	0.0441677
YBL030C	-0.205745	0.0141816
YBL029C-A	0.845856	1.7498e-06
YBL028C	-1.24866	1.55708e-19
YBL023C	-0.0809503	0.477849
YBL022C	-0.255127	0.000541592
YBL021C	-0.223145	0.20911
YBL018C	-0.226501	0.154019
YBL017C	0.255885	0.00256823
YBL014C	-0.155431	0.205893
YBL010C	0.444542	0.00225208
YBL007C	-0.149961	0.0656786
YBL006C	-0.406269	0.000977181
YBL003C	-0.795417	1.04327e-25
YBL001C	-0.0619615	0.625214
YBR001C	0.733891	1.05196e-13
YBR002C	-0.16866	0.175718
YBR004C	0.517395	9.69389e-05
YBR007C	0.316453	0.011301
YBR008C	1.64955	0.000133392
YBR009C	-0.0991277	0.214276
YBR011C	-1.68714	8.82244e-103
YBR014C	0.256251	0.0441579
YBR015C	-1.00472	6.39012e-43
YBR017C	-0.199007	0.0113057
YBR018C	2.22539	5.14729e-05
YBR019C	1.78221	0.00449713
YBR023C	0.31856	2.91485e-05
YBR025C	-1.1115	5.35183e-68
YBR026C	0.421067	6.8182e-06
YBR028C	0.0505904	0.661763
YBR029C	-0.284789	0.00193513
YBR034C	-0.639042	6.13048e-15
YBR035C	0.0056922	0.963201
YBR036C	0.0979195	0.205743
YBR037C	0.807084	1.22171e-12
YBR042C	-0.900445	1.83228e-14
YBR043C	2.44581	1.2541e-116
YBR044C	0.171046	0.162088
YBR045C	0.403211	0.0530108
YBR046C	0.554415	6.75189e-06
YBR049C	-0.729071	9.37831e-19
YBR050C	1.2281	0.00048236
YBR052C	0.449063	4.87522e-07
YBR053C	1.01471	9.49956e-22
YBR055C	0.432195	1.87433e-05
YBR057C	0.0645603	0.620947
YBR058C	0.224383	0.00975756
YBR058C-A	-1.34404	6.51244e-21
YBR059C	0.239251	0.0113073
YBR060C	-0.283323	0.00866242
YBR061C	0.0919576	0.354619
YBR062C	0.321674	0.0325446
YBR063C	1.20855	3.46468e-16
YBR065C	1.29424	6.02663e-25
YBR066C	0.0406164	0.838994
YBR067C	0.328601	0.168327
YBR068C	0.823324	1.15258e-34
YBR069C	0.234138	0.0144574
YBR070C	0.0363415	0.816976
YBR076C-A	0.684777	0.0120285
YBR077C	0.575821	2.23558e-05
YBR079C	-0.806925	3.00483e-39
YBR080C	-0.187363	0.0224296
YBR081C	-0.0461971	0.696335
YBR082C	-0.870208	4.75701e-16
YBR084C-A	-1.18283	2.25171e-54
YBR085C-A	1.01037	2.83846e-29
YBR086C	-0.544888	1.10735e-14
YBR088C	0.0275448	0.766115
YBR089C-A	-0.622742	1.10148e-11
YBR091C	-0.000944352	0.995188
YBR092C	0.131324	0.0504534
YBR093C	-1.01633	3.77189e-31
YBR095C	0.401482	0.000614561
YBR099C	-1.70668	3.619e-06
YBR101C	-0.192432	0.0167174
YBR102C	0.369123	0.000233215
YBR105C	1.16928	1.32625e-15
YBR107C	0.652536	0.00184847
YBR109C	-0.401454	3.1229e-07
YBR111C	0.391079	8.96207e-05
YBR112C	-0.464383	1.05611e-08
YBR115C	0.0909425	0.26172
YBR120C	0.327379	0.053159
YBR121C	-0.581597	1.93286e-20
YBR122C	0.0476622	0.693514
YBR123C	0.226746	0.0566533
YBR125C	-0.599202	2.31058e-08
YBR126C	0.847079	3.82466e-25
YBR127C	-0.919992	1.22568e-35
YBR128C	0.182902	0.639214
YBR129C	0.370354	0.00186452
YBR130C	-0.182345	0.0729781
YBR132C	1.32252	2.79731e-29
YBR133C	-0.177061	0.04977
YBR138C	0.895447	1.1909e-11
YBR140C	0.390656	2.6449e-06
YBR141C	-0.247948	0.121678
YBR143C	-0.60337	3.42215e-18
YBR150C	-0.0375525	0.948627
YBR154C	-0.733364	2.61948e-16
YBR156C	0.490845	0.000227013
YBR157C	-0.668221	0.00133195
YBR162C	-0.820359	1.35058e-25
YBR164C	-0.229076	0.0097134
YBR166C	0.400118	6.26623e-06
YBR167C	0.00102151	0.996277
YBR169C	1.87351	8.67015e-97
YBR170C	0.21452	0.0260263
YBR172C	-0.0653095	0.541038
YBR173C	-0.350136	5.66205e-05
YBR177C	-0.117816	0.229857
YBR179C	0.336188	0.00226215
YBR181C	-0.937148	3.88348e-42
YBR182C	0.739245	0.000193711
YBR185C	0.387714	0.00148825
YBR188C	0.509538	0.000784337
YBR193C	-0.122262	0.371653
YBR195C	-0.0610714	0.691142
YBR196C	-0.425128	1.42808e-09
YBR197C	-0.313172	0.0220144
YBR198C	-0.237829	0.0066673
YBR201C-A	0.0206772	0.967561
YBR204C	0.508741	1.43062e-05
YBR208C	0.29159	0.277223
YBR211C	0.258805	0.172823
YBR216C	0.928162	3.42059e-14
YBR218C	-0.426158	4.72806e-09
YBR221C	-0.766842	1.39639e-30
YBR222C	0.433833	1.15676e-07
YBR223C	1.27108	8.17175e-17
YBR229C	0.0033581	0.974415
YBR230C	0.616159	1.06579e-09
YBR231C	-0.222119	0.142031
YBR234C	-0.0218905	0.809148
YBR236C	0.333723	0.00164511
YBR238C	-0.463609	3.17287e-06
YBR239C	0.198753	0.173828
YBR240C	0.386899	0.307832
YBR241C	0.86903	3.17515e-10
YBR243C	-0.842638	7.03631e-18
YBR245C	-0.403246	1.46889e-07
YBR247C	-0.724455	2.08291e-17
YBR248C	-0.0555194	0.551421
YBR249C	-0.588899	1.33264e-13
YBR254C	-0.325599	0.0138668
YBR255C-A	0.449295	0.0134573
YBR256C	0.833459	1.87006e-18
YBR258C	0.746618	6.63066e-05
YBR260C	-0.0182737	0.877156
YBR261C	-0.453854	1.59362e-06
YBR262C	0.824996	1.30896e-10
YBR264C	0.350967	0.0142043
YBR269C	0.627846	5.77969e-07
YBR270C	1.77606	3.40773e-22
YBR272C	0.476983	2.05856e-06
YBR273C	-0.336577	0.0019916
YBR275C	-0.0832263	0.410431
YBR276C	-0.186082	0.0770349
YBR280C	0.700889	2.06905e-05
YBR281C	-0.203362	0.0240599
YBR283C	-0.940807	1.78623e-41
YBR288C	-0.014232	0.895899
YBR291C	0.681383	5.08851e-11
YBR292C	-3.33398	7.52982e-16
YBR296C	-0.841088	0.00183001
YBR298C	2.72326	6.28182e-73
YBL102W	-0.0868394	0.389805
YBL099W	-0.229628	0.00137794
YBL098W	-1.04724	1.95069e-18
YBL097W	-0.396786	0.00177008
YBL095W	-0.0187569	0.910799
YBL092W	-1.34538	2.4314e-49
YBL090W	0.311035	0.00854651
YBL089W	0.442701	0.000877203
YBL085W	-0.0960531	0.354513
YBL081W	-1.47639	5.24429e-33
YBL079W	-0.0866468	0.336163
YBL071W-A	-0.757172	2.03148e-09
YBL068W	-0.514475	1.47134e-08
YBL063W	-0.275002	0.0493089
YBL060W	1.18944	8.29267e-22
YBL059W	0.624337	0.000409754
YBL058W	0.0176794	0.842761
YBL056W	-0.428378	3.95603e-08
YBL054W	-0.694774	5.60735e-11
YBL050W	0.162945	0.0591696
YBL048W	3.78148	3.35831e-07
YBL046W	-0.0497118	0.719842
YBL043W	4.3619	1.19647e-35
YBL041W	0.0461191	0.595419
YBL039W-B	0.0908405	0.79308
YBL038W	0.526508	3.37778e-07
YBL037W	0.474928	9.91656e-08
YBL032W	-0.566786	1.44103e-10
YBL031W	-0.497077	0.01913
YBL029W	-0.00465051	0.987836
YBL027W	-1.08728	2.13103e-40
YBL026W	-0.506318	1.80869e-05
YBL025W	0.0207904	0.934804
YBL024W	-0.489745	7.21189e-13
YBL020W	-0.984332	1.42098e-21
YBL019W	1.26045	5.89604e-15
YBL016W	0.189912	0.051999
YBL015W	0.299499	0.00464736
YBL011W	-0.605696	1.68037e-12
YBL009W	-0.364896	0.000251516
YBL008W	-0.417889	7.94408e-05
YBL005W	0.236213	0.0574632
YBL004W	-0.99367	6.49967e-32
YBL002W	-0.965972	1.69814e-31
YBR003W	0.146428	0.178588
YBR005W	0.983268	3.6402e-14
YBR006W	1.37979	2.43538e-24
YBR010W	0.0927306	0.24062
YBR016W	-0.546104	5.40804e-06
YBR020W	1.50306	1.90649e-09
YBR021W	0.438264	9.20153e-05
YBR022W	0.120744	0.417599
YBR024W	0.736152	1.34444e-07
YBR030W	0.395747	0.00319259
YBR031W	-1.05398	3.77288e-49
YBR033W	3.52921	2.4291e-58
YBR038W	-0.412337	1.50863e-07
YBR039W	-0.145795	0.0544456
YBR041W	-0.239592	0.0145709
YBR047W	0.92302	0.000594653
YBR048W	-1.45709	9.3317e-71
YBR054W	1.13949	2.9259e-23
YBR056W	1.06512	4.97881e-29
YBR056W-A	0.301164	0.169372
YBR071W	0.576136	3.97713e-08
YBR072W	3.13196	6.64398e-22
YBR073W	0.362934	6.73714e-06
YBR074W	-0.126563	0.197111
YBR076W	1.36026	0.0915536
YBR078W	-0.720926	7.8142e-32
YBR083W	0.306864	0.00229392
YBR084W	-1.2352	4.58103e-83
YBR085W	-1.89579	1.95374e-16
YBR087W	-0.126086	0.238464
YBR094W	-0.264661	0.00614938
YBR096W	-0.0141822	0.912707
YBR097W	0.0557078	0.634361
YBR098W	0.784033	3.14731e-07
YBR103W	0.347722	0.00183328
YBR104W	-0.955272	3.03775e-21
YBR106W	-1.54814	1.16262e-81
YBR108W	0.577894	2.51849e-08
YBR110W	-0.198342	0.0583684
YBR111W-A	0.0567381	0.746863
YBR114W	0.617497	2.26354e-07
YBR118W	-0.76975	2.05797e-28
YBR119W	0.252867	0.108052
YBR131W	0.287256	0.0538436
YBR135W	-0.610926	1.19958e-08
YBR136W	-0.00130985	0.991017
YBR137W	-0.149675	0.168225
YBR139W	0.913062	4.02317e-23
YBR141W-A	-1.07849	0.101136
YBR142W	-0.733076	2.71382e-17
YBR145W	0.574578	4.9864e-06
YBR146W	-0.595762	1.96991e-10
YBR147W	1.74071	1.03109e-10
YBR148W	-0.302711	0.396219
YBR149W	1.21537	9.03984e-53
YBR151W	-0.48106	3.36146e-07
YBR152W	0.444772	0.0142535
YBR153W	0.252531	0.0796431
YBR155W	-1.03101	2.75474e-26
YBR158W	-0.202154	0.0134973
YBR159W	-0.646303	2.54345e-16
YBR160W	0.0993291	0.31401
YBR161W	0.319736	0.0282505
YBR162W-A	-1.28011	3.90328e-36
YBR163W	0.142883	0.344454
YBR165W	0.0884101	0.566691
YBR168W	0.44369	0.0067483
YBR171W	-0.763276	1.24887e-14
YBR175W	0.473732	0.000589148
YBR176W	-0.497783	0.00112924
YBR183W	2.07102	5.27361e-46
YBR184W	1.40026	2.15959e-09
YBR186W	2.61572	0.0013127
YBR187W	-1.28371	8.3001e-53
YBR189W	-1.14744	1.66478e-45
YBR192W	-0.501873	2.14599e-05
YBR194W	0.374179	0.0524218
YBR199W	0.120989	0.215146
YBR200W	0.20519	0.0432868
YBR201W	-0.523854	0.00812179
YBR202W	-0.236808	0.00617351
YBR203W	0.944273	7.89515e-13
YBR205W	-0.567654	1.70998e-12
YBR207W	0.335317	0.00522883
YBR210W	-0.0254879	0.895323
YBR212W	0.144444	0.132505
YBR213W	-1.44274	1.98912e-16
YBR214W	1.42695	4.53764e-30
YBR215W	0.105382	0.397365
YBR217W	0.878074	1.01678e-05
YBR225W	0.615899	6.36268e-07
YBR228W	0.881088	1.44709e-07
YBR230W-A	0.449833	0.0127847
YBR233W	-0.0691665	0.618692
YBR233W-A	-0.693787	0.000593564
YBR235W	0.373731	0.000348349
YBR237W	1.02457	1.12515e-15
YBR242W	-0.26253	0.0167042
YBR244W	0.0563254	0.755126
YBR246W	0.307756	0.00155948
YBR250W	0.118942	0.784135
YBR251W	0.54674	3.95588e-07
YBR252W	-0.790484	1.39175e-14
YBR253W	0.0932167	0.554899
YBR255W	0.636996	9.08753e-07
YBR257W	0.138553	0.355777
YBR259W	0.681826	2.25633e-06
YBR263W	-2.44182	6.91345e-229
YBR265W	-0.159491	0.126091
YBR267W	-0.63334	5.89852e-11
YBR268W	-0.0224921	0.876204
YBR271W	-0.688168	1.10653e-07
YBR274W	0.54089	9.41362e-06
YBR278W	0.603898	0.000912686
YBR279W	-0.0279679	0.812866
YBR282W	0.122715	0.313915
YBR284W	1.90496	1.67121e-17
YBR285W	0.919097	0.114919
YBR286W	-0.88558	2.44073e-42
YBR287W	-0.118437	0.241954
YBR289W	-0.119008	0.272058
YBR290W	0.182776	0.15346
YBR293W	1.65172	1.29273e-35
YBR294W	0.610772	0.0805589
YBR295W	1.16799	1.55062e-20
YBR297W	1.14097	1.92854e-13
YBR299W	2.57388	8.43069e-56
YCL064C	-1.59199	8.21842e-47
YCL061C	1.37212	1.26726e-49
YCL059C	0.348258	1.49995e-05
YCL057C-A	1.1141	3.44307e-32
YCL056C	1.70191	1.67153e-25
YCL052C	0.986582	3.48488e-30
YCL050C	0.0371969	0.663067
YCL049C	2.51234	8.84429e-155
YCL047C	0.934037	6.66372e-14
YCL045C	0.39727	3.30124e-09
YCL044C	0.196508	0.0435752
YCL043C	0.177718	0.0334475
YCL041C	0.351635	9.97143e-05
YCL038C	1.67327	2.37721e-50
YCL037C	-0.349571	6.59858e-08
YCL035C	1.37053	4.43451e-61
YCL033C	1.33673	1.80442e-30
YCL031C	0.654765	2.58592e-16
YCL030C	1.16936	1.95751e-30
YCL029C	0.549748	2.00261e-07
YCL026C-B	0.0451289	0.830251
YCL026C-A	0.513204	0.213069
YCL025C	1.41922	1.17082e-53
YCL017C	0.372625	5.01124e-07
YCL016C	1.62427	2.03673e-39
YCL012C	1.4759	2.76173e-24
YCL011C	0.730834	3.37352e-22
YCL010C	1.88389	1.43139e-84
YCL009C	-0.238944	0.00686096
YCL008C	0.847433	3.9761e-16
YCL002C	0.562667	0.000122918
YCR002C	1.09634	1.88343e-47
YCR004C	0.840233	2.34503e-31
YCR005C	2.04266	8.88798e-111
YCR007C	2.95064	1.91782e-46
YCR009C	0.833445	7.60854e-23
YCR010C	1.48606	0.02586
YCR011C	1.24712	1.86402e-68
YCR014C	2.45048	6.5587e-57
YCR015C	2.14523	6.89372e-62
YCR017C	1.00729	2.33266e-31
YCR020C	2.4461	1.08928e-27
YCR020C-A	0.849431	1.31331e-10
YCR021C	4.19703	5.53012e-86
YCR022C	0.30661	0.72415
YCR023C	1.57498	2.41739e-54
YCR024C	1.50865	9.79346e-37
YCR024C-B	-1.31662	2.0743e-43
YCR024C-A	-0.432944	0.000195236
YCR025C	-0.406286	0.538527
YCR026C	1.3598	1.21061e-65
YCR027C	0.620078	2.14963e-06
YCR028C	0.781814	2.9966e-16
YCR028C-A	0.0513515	0.575007
YCR030C	1.20324	3.45633e-45
YCR031C	-0.152266	0.0618983
YCR035C	0.61224	1.63141e-10
YCR037C	2.28416	1.72247e-144
YCR038C	1.69236	3.62006e-32
YCR042C	1.34002	3.17557e-63
YCR043C	-0.391246	8.49553e-06
YCR044C	0.489264	4.2473e-06
YCR046C	0.92772	6.49055e-19
YCR047C	-0.184291	0.108429
YCR054C	1.41755	8.79849e-47
YCR057C	0.359341	7.53479e-06
YCR059C	0.460866	1.3325e-06
YCR064C	1.20216	0.107576
YCR067C	0.885676	2.64738e-31
YCR071C	0.979091	3.5064e-17
YCR072C	0.342168	1.90213e-05
YCR073C	2.50742	2.99343e-140
YCR075C	1.57307	1.14719e-34
YCR076C	1.7422	1.10222e-43
YCR077C	0.878082	1.21983e-36
YCR084C	0.181043	0.0192823
YCR087C-A	0.297873	0.00758156
YCR090C	0.790972	1.54466e-11
YCR092C	0.757423	1.16599e-12
YCR095C	1.21256	8.13765e-25
YCR098C	1.88437	2.76284e-08
YCR102C	1.04665	7.83341e-06
YCL063W	0.482143	3.62587e-05
YCL058W-A	0.0518805	0.7713
YCL057W	0.758276	1.11439e-28
YCL055W	1.08352	7.16999e-22
YCL054W	0.206651	0.0243852
YCL051W	1.05712	4.25943e-24
YCL048W	2.74378	1.7036e-12
YCL040W	3.21627	1.82915e-50
YCL039W	1.79861	8.78834e-78
YCL036W	0.566586	3.35404e-09
YCL034W	1.06149	3.28676e-36
YCL032W	1.33036	3.33584e-35
YCL028W	0.125765	0.151697
YCL027W	0.027794	0.92157
YCL024W	1.56291	2.98483e-67
YCL021W-A	-1.41428	1.68037e-12
YCL018W	2.54198	6.03511e-139
YCL014W	0.871618	1.64252e-21
YCL005W-A	-0.185671	0.0277952
YCL005W	0.962408	1.05509e-14
YCL004W	2.09271	8.42538e-64
YCL001W	0.465485	6.55448e-08
YCR003W	1.4624	1.56295e-42
YCR008W	0.0495867	0.700985
YCR012W	0.207582	0.0121372
YCR016W	0.163149	0.0922434
YCR019W	1.40177	1.45141e-30
YCR020W-B	0.390481	0.00178367
YCR032W	1.4896	5.41089e-46
YCR033W	0.300785	0.00212638
YCR034W	-0.179194	0.0184548
YCR036W	2.09279	5.34096e-138
YCR045W-A	0.0388688	0.863271
YCR048W	0.0792483	0.438365
YCR051W	0.162276	0.0623144
YCR052W	0.109901	0.175067
YCR053W	0.527269	2.36398e-13
YCR061W	0.552978	9.96143e-08
YCR063W	1.50655	7.04036e-30
YCR065W	0.943493	1.33512e-25
YCR066W	1.52603	8.87799e-34
YCR068W	1.80331	1.8615e-54
YCR069W	0.636395	2.37144e-12
YCR073W-A	1.0135	4.93683e-28
YCR075W-A	0.816353	9.71339e-06
YCR079W	1.24645	1.33719e-20
YCR081W	1.43329	9.8821e-54
YCR082W	0.970789	9.6692e-21
YCR083W	0.993055	2.91494e-15
YCR086W	1.03432	7.38226e-13
YCR088W	0.791142	1.50513e-21
YCR089W	2.79098	3.23119e-179
YCR091W	2.75248	4.6867e-90
YCR093W	0.308648	8.38776e-06
YCR094W	0.781186	2.00069e-18
YCR095W-A	-1.13223	0.00101044
YCR097W	-10.8477	3.08575e-13
YCR105W	1.66289	2.23503e-07
YCR106W	2.4079	1.92533e-114
YCR107W	2.36505	1.18577e-16
YDL243C	2.34594	6.52758e-12
YDL239C	0.45888	0.0305828
YDL238C	1.54662	1.83101e-22
YDL235C	-0.619263	2.4651e-09
YDL234C	1.30465	1.62874e-41
YDL231C	1.51547	2.28998e-50
YDL227C	-1.35179	3.50512e-50
YDL226C	-0.249222	0.00244889
YDL224C	0.177357	0.0507916
YDL222C	1.30954	1.10679e-07
YDL220C	0.150174	0.232575
YDL217C	0.115308	0.340232
YDL216C	0.867444	3.27538e-06
YDL215C	1.98987	1.0119e-109
YDL214C	0.694663	0.0680496
YDL213C	-0.467141	4.5806e-06
YDL211C	0.2581	0.230233
YDL209C	0.0531233	0.742443
YDL205C	-0.875553	6.50915e-22
YDL203C	0.159137	0.141444
YDL200C	0.651791	6.28305e-05
YDL199C	1.66559	1.93416e-13
YDL198C	-0.379969	6.14281e-07
YDL197C	1.70111	2.88658e-41
YDL190C	0.0426236	0.661821
YDL188C	-0.367159	6.38517e-05
YDL187C	-0.543407	0.27153
YDL184C	-4.11706	6.26329e-52
YDL183C	0.75259	0.00154795
YDL177C	0.167654	0.420187
YDL175C	0.243551	0.0779989
YDL174C	0.496887	9.53808e-09
YDL171C	-1.41176	1.09405e-62
YDL169C	2.10984	1.4343e-11
YDL167C	-0.402332	1.18934e-05
YDL166C	-0.330556	0.00228069
YDL164C	0.0423191	0.694431
YDL160C-A	-1.14507	2.20715e-11
YDL160C	0.306793	2.44229e-05
YDL157C	-0.647735	7.90818e-08
YDL153C	-0.867895	3.36497e-19
YDL148C	-0.414136	5.44391e-07
YDL145C	-0.556539	1.83228e-14
YDL144C	-0.296539	0.00570091
YDL142C	0.295795	0.0638116
YDL140C	-0.667314	1.84638e-17
YDL139C	0.611932	0.00588128
YDL135C	-0.546196	4.79605e-07
YDL134C	-0.329651	6.06064e-05
YDL133C-A	-3.6459	1.19665e-42
YDL126C	-0.304623	8.34842e-06
YDL125C	0.0574917	0.493726
YDL121C	-0.4543	5.92953e-05
YDL119C	0.635668	1.06661e-05
YDL115C	0.582012	2.94403e-06
YDL113C	0.769157	5.85592e-11
YDL111C	-0.315644	0.000536205
YDL110C	1.13714	4.31806e-28
YDL109C	1.65938	2.62015e-26
YDL106C	0.440441	5.33715e-05
YDL104C	0.200701	0.281673
YDL103C	-0.0626562	0.518327
YDL101C	0.28449	0.010165
YDL100C	-0.356365	2.06151e-07
YDL098C	-0.562777	0.00303842
YDL097C	-0.15054	0.0483945
YDL094C	2.54542	8.56602e-05
YDL091C	0.315048	0.0456755
YDL090C	-0.0965281	0.479577
YDL088C	0.176249	0.0712741
YDL087C	0.528475	0.000925256
YDL086C-A	-0.584475	0.331226
YDL085C-A	-1.85356	9.35543e-24
YDL083C	-1.18763	7.39588e-75
YDL081C	-1.69012	1.01334e-100
YDL080C	0.638029	3.26774e-07
YDL079C	1.54581	1.7725e-08
YDL078C	-0.218455	0.0171892
YDL077C	0.53219	9.18176e-08
YDL076C	0.119563	0.358838
YDL074C	-0.585102	6.97875e-13
YDL072C	0.788219	1.36697e-15
YDL069C	-0.0753062	0.739315
YDL067C	-0.770182	2.58601e-16
YDL065C	0.136674	0.222206
YDL063C	-0.797418	4.32731e-17
YDL061C	-2.42184	7.33422e-46
YDL059C	0.249007	0.251468
YDL055C	-0.619404	5.26164e-19
YDL054C	0.0549757	0.696335
YDL053C	-0.519846	1.20127e-07
YDL052C	-0.527609	3.91157e-08
YDL049C	0.834516	0.00119142
YDL048C	0.607857	0.00173544
YDL045C	0.180848	0.225889
YDL044C	0.505594	0.000158714
YDL043C	-0.127107	0.379861
YDL042C	-0.703764	5.96277e-11
YDL040C	-0.440757	2.94628e-09
YDL039C	-1.0222	0.00263093
YDL036C	-0.380971	0.0126267
YDL035C	-0.340083	0.00429177
YDL033C	0.25388	0.108505
YDL028C	-0.0363745	0.791549
YDL027C	0.637806	4.97031e-05
YDL025C	1.0576	2.92398e-13
YDL024C	1.06852	0.008208
YDL020C	0.763578	1.5066e-18
YDL019C	-0.270571	0.00220789
YDL018C	-0.0764843	0.601183
YDL015C	-0.297472	4.63518e-05
YDL012C	-0.776433	3.48273e-12
YDL009C	-7.82247	1.7258e-06
YDL005C	-0.0839528	0.478771
YDL002C	-0.7236	3.97446e-10
YDR001C	1.59726	1.25042e-79
YDR005C	0.807195	3.62791e-15
YDR006C	0.242076	0.0112096
YDR008C	-1.44617	0.000198316
YDR016C	0.474447	0.00591707
YDR017C	0.177159	0.0566533
YDR018C	3.41802	8.88062e-17
YDR019C	2.00712	5.69233e-83
YDR020C	-0.553591	0.000773221
YDR022C	0.840772	4.59914e-05
YDR026C	0.264258	0.0293672
YDR027C	-0.391814	9.62191e-05
YDR028C	0.145048	0.0727531
YDR030C	0.76452	5.92953e-05
YDR032C	0.236451	0.00497285
YDR034C	0.362396	0.000141381
YDR036C	-0.220903	0.0317072
YDR038C	0.591655	2.20241e-19
YDR042C	-0.850235	0.0956721
YDR045C	-0.570999	1.43822e-05
YDR046C	0.501584	7.67264e-09
YDR048C	-1.30794	0.129887
YDR050C	-0.774033	3.53355e-23
YDR051C	-0.264674	0.0144487
YDR052C	-0.141995	0.200699
YDR054C	-0.504212	1.55239e-10
YDR056C	-0.409099	6.2133e-05
YDR058C	1.64595	1.65481e-13
YDR059C	1.37549	1.62577e-21
YDR066C	0.113053	0.627853
YDR067C	0.393095	0.00938624
YDR069C	0.784425	8.47473e-12
YDR070C	0.670109	0.120253
YDR071C	-0.112398	0.225155
YDR072C	-0.0398844	0.687529
YDR078C	0.983146	1.95491e-06
YDR079C-A	-0.522508	0.00302345
YDR081C	-0.209229	0.0769972
YDR084C	-0.316979	0.00555514
YDR085C	1.33231	2.49036e-28
YDR086C	-2.07686	1.37271e-143
YDR087C	-0.497995	5.92716e-08
YDR088C	0.0620182	0.712564
YDR090C	-0.485778	6.94995e-05
YDR091C	-0.674539	4.74588e-23
YDR097C	-0.107635	0.232777
YDR098C	-0.161359	0.153425
YDR101C	-0.449303	2.4651e-09
YDR104C	0.530372	0.000406682
YDR105C	-0.0965933	0.414703
YDR107C	-0.013351	0.94855
YDR109C	0.780713	2.74771e-09
YDR111C	0.457426	0.000596312
YDR113C	-0.0202123	0.885614
YDR116C	0.178563	0.0942439
YDR117C	-0.21412	0.0405145
YDR120C	-0.880002	1.14586e-31
YDR123C	-0.00656778	0.967059
YDR125C	0.83357	2.55896e-05
YDR129C	-0.116547	0.096319
YDR130C	0.846242	3.84958e-10
YDR131C	1.07535	3.33288e-14
YDR132C	0.405445	0.0101643
YDR133C	1.08707	8.80427e-50
YDR135C	-0.0919039	0.330069
YDR139C	-1.02381	4.63411e-15
YDR141C	0.392806	4.47772e-07
YDR142C	-0.0429878	0.807087
YDR143C	-0.546088	5.93975e-09
YDR144C	-1.21653	2.18655e-52
YDR146C	0.0569753	0.554856
YDR148C	0.156954	0.0746552
YDR151C	-0.141409	0.245671
YDR153C	-0.156457	0.0757965
YDR162C	0.21807	0.0809304
YDR164C	0.0294299	0.807809
YDR166C	0.136804	0.164518
YDR169C	-0.0471488	0.70757
YDR170C	-0.68177	6.11927e-23
YDR173C	0.0803476	0.628983
YDR175C	0.246296	0.0166261
YDR179C	0.748046	0.000963916
YDR181C	0.524384	2.46427e-05
YDR185C	0.764418	0.00635047
YDR186C	0.307073	0.000429543
YDR190C	-0.0920151	0.297456
YDR192C	-0.327534	0.00555514
YDR194C	-0.543025	6.48811e-12
YDR196C	0.58598	2.69609e-07
YDR198C	0.0508508	0.724142
YDR200C	0.257617	0.0361328
YDR202C	0.500287	0.000104211
YDR207C	0.00611496	0.967059
YDR217C	-0.448165	3.79757e-05
YDR218C	0.710876	0.278834
YDR219C	0.377888	0.00102349
YDR224C	-0.179887	0.0431716
YDR228C	0.142632	0.222156
YDR231C	1.38395	1.42574e-31
YDR233C	-0.874965	6.47811e-38
YDR236C	0.688898	5.42271e-08
YDR238C	-0.475807	7.03215e-13
YDR239C	-0.0229559	0.866147
YDR240C	-0.21935	0.137825
YDR243C	-0.0270626	0.838654
YDR248C	0.117594	0.438817
YDR249C	0.478903	0.00990271
YDR253C	0.106796	0.742456
YDR255C	0.251821	0.103242
YDR256C	0.834961	0.0355677
YDR257C	0.338329	0.000249782
YDR258C	1.6606	2.9883e-76
YDR259C	0.0196911	0.940346
YDR260C	-0.0932252	0.522959
YDR261C	-0.269989	0.00366539
YDR263C	0.613348	0.00157163
YDR264C	-0.301038	0.00022824
YDR266C	-0.338487	8.80766e-05
YDR267C	0.0429097	0.724277
YDR276C	-2.04092	1.38711e-149
YDR277C	1.58515	2.16281e-41
YDR281C	-4.667	9.50859e-43
YDR282C	0.348449	0.0309596
YDR283C	0.33221	0.000458786
YDR284C	0.013314	0.916299
YDR286C	-0.117479	0.576606
YDR289C	0.0194175	0.879112
YDR292C	-0.667675	2.72395e-15
YDR293C	0.702735	6.54703e-22
YDR294C	0.112169	0.193766
YDR295C	0.0112588	0.931732
YDR298C	-0.323941	0.000196821
YDR300C	-1.05921	7.01644e-27
YDR303C	-0.737954	1.01315e-16
YDR304C	-0.397418	4.22287e-05
YDR305C	0.191477	0.197241
YDR306C	0.68161	7.77164e-08
YDR308C	-0.299318	0.0254067
YDR309C	0.758537	4.24422e-21
YDR310C	-0.749453	4.64964e-19
YDR313C	0.41943	0.00537489
YDR314C	0.83303	2.79623e-08
YDR315C	0.55771	0.00559121
YDR319C	0.78942	1.14768e-07
YDR320C	0.291849	0.00191009
YDR320C-A	0.353095	0.0731317
YDR322C-A	-0.23015	0.0318582
YDR323C	0.37648	0.0452158
YDR324C	-0.51768	1.29815e-10
YDR326C	-0.285361	0.00561205
YDR328C	-0.487209	7.04221e-10
YDR329C	0.208392	0.0609886
YDR333C	-0.174322	0.0588722
YDR338C	0.0741307	0.602151
YDR339C	-0.225726	0.028422
YDR341C	-0.677334	5.54892e-25
YDR342C	2.55255	1.71887e-37
YDR343C	2.56782	1.94913e-38
YDR345C	-0.4844	3.59079e-06
YDR346C	-1.03338	2.74763e-45
YDR348C	-0.267331	0.00318441
YDR349C	0.556083	9.0432e-10
YDR350C	1.3741	8.48409e-36
YDR357C	0.551748	8.62151e-05
YDR359C	-0.143961	0.266408
YDR361C	-0.613738	1.03507e-11
YDR362C	0.0104403	0.939929
YDR364C	0.615958	8.15162e-08
YDR365C	-0.490037	1.61428e-08
YDR366C	1.42162	0.0383392
YDR369C	0.277843	0.0303688
YDR370C	0.746276	4.44021e-08
YDR372C	-0.353814	4.26453e-06
YDR375C	0.290465	0.0127602
YDR378C	-0.686309	3.05825e-11
YDR379C-A	1.35384	1.21641e-07
YDR381C-A	0.902438	1.9827e-06
YDR383C	1.08742	3.89072e-08
YDR384C	0.511267	1.69775e-07
YDR387C	0.702098	2.86951e-07
YDR390C	0.151756	0.15
YDR391C	2.48915	1.67005e-99
YDR397C	-0.271492	0.009553
YDR402C	1.47029	0.00135442
YDR404C	-0.519565	5.42808e-08
YDR407C	0.171806	0.0717748
YDR408C	-0.24015	0.0162741
YDR410C	-0.879831	8.05421e-11
YDR411C	0.23942	0.0181759
YDR414C	-0.915503	6.66119e-11
YDR415C	0.183972	0.110943
YDR422C	-0.511897	2.17618e-07
YDR423C	0.239636	0.0429453
YDR424C	-0.514821	3.05571e-05
YDR428C	-1.11506	1.81596e-18
YDR429C	-0.653014	3.35227e-20
YDR430C	0.171694	0.0522669
YDR435C	0.798336	2.68617e-09
YDR441C	-1.51821	8.74635e-44
YDR443C	0.0807867	0.484194
YDR445C	-0.107649	0.911075
YDR447C	-0.511295	6.8459e-15
YDR449C	-0.276927	0.00167998
YDR451C	0.418656	0.000117955
YDR453C	0.854978	0.000679725
YDR454C	-1.27041	1.93574e-54
YDR458C	0.180546	0.0733061
YDR459C	1.06569	1.11974e-13
YDR461C-A	-0.0777858	0.779952
YDR465C	-0.534034	5.97057e-09
YDR468C	-0.355675	0.00433182
YDR470C	0.00530055	0.969089
YDR473C	0.261236	0.0664378
YDR475C	0.377448	0.00255364
YDR476C	-0.404875	0.000507093
YDR479C	1.15617	2.89021e-22
YDR481C	-0.467783	1.64415e-09
YDR482C	-0.482971	0.016473
YDR485C	0.342222	0.00540286
YDR486C	-0.295419	0.00846287
YDR487C	-0.509834	3.21112e-07
YDR488C	-0.202653	0.212553
YDR490C	0.698243	1.43183e-10
YDR495C	0.232654	0.106229
YDR496C	-0.423303	1.06769e-07
YDR497C	0.637631	1.42889e-14
YDR498C	-0.153287	0.217869
YDR500C	-1.19287	4.68965e-40
YDR502C	-0.501312	3.86848e-08
YDR503C	0.118006	0.463316
YDR504C	-0.357632	0.195907
YDR505C	0.0698834	0.434902
YDR506C	-0.433048	0.0209703
YDR507C	0.0451719	0.601763
YDR508C	0.226437	0.00134097
YDR512C	-0.246909	0.0701446
YDR514C	-0.0752842	0.559
YDR516C	1.18889	5.85075e-31
YDR520C	-0.0128211	0.94208
YDR523C	0.969992	0.018675
YDR524C	-0.352606	0.00156073
YDR524C-B	-1.50679	4.73073e-60
YDR524C-A	-2.72644	0.00682318
YDR529C	-0.0562582	0.511635
YDR530C	1.31394	1.18955e-28
YDR532C	0.677564	1.70757e-05
YDR533C	0.229361	0.0869724
YDR534C	1.73891	3.17674e-11
YDR535C	-0.37183	0.29357
YDR540C	-1.28096	1.65013e-06
YDR541C	0.608505	0.000314554
YDL248W	0.65711	2.79302e-14
YDL244W	2.06594	8.40232e-25
YDL242W	-0.262278	0.748656
YDL241W	-0.237323	0.128835
YDL240W	-0.254687	0.0238732
YDL237W	-0.093951	0.403104
YDL236W	-0.355838	1.21596e-05
YDL233W	0.755414	1.4667e-09
YDL232W	-2.21221	1.40388e-44
YDL230W	0.491107	0.00153852
YDL229W	-1.09035	1.39624e-76
YDL225W	-0.278385	0.00819222
YDL221W	2.5829	0.00295867
YDL219W	-0.810854	2.8163e-13
YDL218W	0.417743	0.357018
YDL212W	-0.582839	4.9089e-13
YDL210W	0.786376	0.017646
YDL208W	-0.722814	5.21952e-18
YDL207W	-0.247702	0.0503959
YDL206W	0.538459	0.00211929
YDL204W	2.2299	8.92359e-73
YDL202W	0.14781	0.161524
YDL201W	-0.895128	1.84926e-23
YDL195W	-0.760347	8.21908e-29
YDL194W	0.730361	4.45348e-06
YDL193W	-0.111883	0.360241
YDL192W	-0.575821	8.9154e-12
YDL191W	-1.15555	1.50117e-49
YDL189W	-0.292712	0.00883569
YDL185W	-0.529111	1.07122e-15
YDL182W	-0.412753	1.12104e-08
YDL181W	-0.973274	1.06092e-16
YDL180W	-0.0900661	0.541038
YDL179W	0.160462	0.166053
YDL178W	0.0716046	0.422565
YDL176W	0.902293	3.5133e-12
YDL173W	0.502007	1.5328e-07
YDL170W	0.478425	0.000160712
YDL168W	-0.0220853	0.798126
YDL165W	-0.604599	2.08415e-06
YDL161W	-0.0681034	0.498226
YDL159W	0.197483	0.123433
YDL156W	0.0352457	0.840429
YDL155W	-0.255388	0.0389682
YDL154W	1.13615	5.82334e-07
YDL150W	-0.697883	2.13021e-10
YDL149W	0.515458	0.0022792
YDL147W	0.225615	0.00240376
YDL146W	-0.571419	0.00262338
YDL143W	-0.498872	4.22001e-12
YDL141W	-0.436036	8.90087e-07
YDL138W	0.0307066	0.865912
YDL137W	-0.306097	0.000514675
YDL136W	-1.02847	2.49375e-39
YDL133W	0.471295	0.000107509
YDL132W	-0.153586	0.0655604
YDL131W	-0.291236	3.83488e-05
YDL130W-A	1.18203	2.69184e-14
YDL130W	-1.30871	1.85788e-65
YDL129W	-1.34166	1.13434e-09
YDL128W	-0.425513	2.4357e-07
YDL127W	-0.912489	2.46394e-09
YDL124W	1.46565	2.45731e-89
YDL123W	-0.810759	2.25983e-08
YDL122W	-0.302408	0.000608644
YDL120W	-0.186292	0.0833886
YDL117W	-0.0784612	0.440133
YDL116W	-0.270537	0.00260031
YDL112W	-0.60249	3.9183e-12
YDL108W	0.23519	0.0654038
YDL107W	1.00017	1.53386e-10
YDL105W	0.273634	0.0890296
YDL102W	-0.157133	0.0890296
YDL099W	-0.232168	0.0241338
YDL095W	-1.13251	4.73073e-60
YDL093W	-0.296694	0.0070982
YDL092W	-0.651319	1.52029e-09
YDL089W	-0.378975	0.0101752
YDL086W	0.210371	0.0468908
YDL085W	2.05677	5.09153e-07
YDL084W	-1.02356	2.05206e-60
YDL082W	-1.22829	1.21534e-56
YDL075W	-1.24106	7.17888e-70
YDL073W	0.0493468	0.677242
YDL070W	-0.479343	7.40763e-07
YDL066W	-1.67834	2.76212e-111
YDL064W	-0.972675	1.34634e-23
YDL060W	-0.50975	9.58161e-11
YDL058W	-0.957161	2.41747e-27
YDL057W	0.812437	6.16717e-06
YDL056W	0.417016	0.00011363
YDL051W	-0.810267	1.94845e-28
YDL046W	-0.602392	2.30978e-14
YDL045W-A	-0.163936	0.281605
YDL031W	-0.740686	4.65714e-20
YDL030W	-0.465683	0.000977181
YDL029W	0.270928	0.00182893
YDL022W	1.46487	1.20135e-50
YDL021W	2.64835	2.63023e-25
YDL017W	0.72132	1.42394e-07
YDL014W	-1.17339	6.16547e-41
YDL013W	-0.150771	0.24739
YDL010W	-0.0941746	0.485317
YDL008W	-0.337239	0.0309596
YDL007W	-0.196943	0.0105608
YDL006W	-0.615928	2.96577e-07
YDL004W	-0.577614	6.26286e-13
YDL003W	-0.158326	0.0953728
YDL001W	0.3404	0.00411776
YDR002W	-0.737163	2.51543e-20
YDR003W-A	-0.593954	0.105119
YDR004W	0.674482	8.71734e-07
YDR007W	1.86117	2.63513e-22
YDR009W	1.66312	8.29967e-15
YDR011W	0.695697	1.07983e-12
YDR012W	-1.07362	1.40439e-51
YDR013W	0.739863	6.67675e-08
YDR014W	0.667176	1.48977e-05
YDR014W-A	0.191525	0.809135
YDR021W	-0.0721428	0.697313
YDR023W	-0.357048	4.95554e-08
YDR024W	2.59872	0.00012197
YDR025W	-0.96277	3.07801e-35
YDR031W	0.750757	1.10271e-05
YDR033W	-0.887773	6.73135e-43
YDR034W-B	2.61704	4.62081e-17
YDR035W	-0.482557	3.77623e-10
YDR037W	-0.544077	1.89277e-16
YDR041W	0.534389	1.2312e-07
YDR044W	-0.461933	3.5077e-05
YDR047W	0.307715	0.000435533
YDR049W	0.0603485	0.596754
YDR055W	1.79681	1.59989e-171
YDR057W	0.164929	0.205075
YDR060W	-0.77882	6.55297e-29
YDR061W	0.355982	0.000325835
YDR062W	-0.883984	1.29872e-33
YDR063W	-0.363103	0.010123
YDR064W	-1.06005	1.0685e-41
YDR065W	0.228155	0.197617
YDR068W	-0.0904234	0.4824
YDR073W	0.325802	0.0133252
YDR074W	1.54111	6.3427e-89
YDR075W	-0.535529	3.36467e-05
YDR076W	0.36631	0.028974
YDR077W	1.80451	6.43845e-196
YDR079W	-0.437764	0.014067
YDR080W	0.272197	0.0100625
YDR082W	2.12015	1.30903e-48
YDR083W	-0.71572	1.6294e-13
YDR089W	0.267158	0.0127621
YDR092W	-0.151452	0.177329
YDR093W	-0.613146	1.30532e-13
YDR096W	0.477055	1.84795e-06
YDR099W	-0.471086	5.56494e-11
YDR100W	0.270472	0.0853441
YDR103W	0.0994664	0.354362
YDR106W	1.14334	0.00985903
YDR108W	0.392499	0.00348526
YDR110W	-0.506311	1.04399e-05
YDR115W	0.278898	0.0407775
YDR118W	0.332234	0.0159525
YDR119W	-0.738806	1.29331e-25
YDR119W-A	0.958664	0.0288506
YDR121W	-0.393482	0.00108828
YDR122W	0.450864	7.65146e-05
YDR124W	1.32887	2.59603e-09
YDR126W	0.560618	0.00781585
YDR127W	0.0671718	0.343685
YDR128W	0.160016	0.135155
YDR137W	0.599317	2.70622e-08
YDR138W	-0.0296488	0.812355
YDR140W	0.117715	0.326321
YDR145W	-0.150894	0.0894631
YDR147W	0.965097	2.0226e-18
YDR150W	0.029122	0.738467
YDR152W	-0.23929	0.011995
YDR158W	-0.342038	3.01004e-06
YDR159W	-0.464072	1.92046e-05
YDR160W	1.01031	1.0143e-12
YDR161W	-0.693022	8.94507e-16
YDR163W	-0.167167	0.334608
YDR165W	-0.368871	4.37823e-06
YDR167W	-0.295296	0.00582856
YDR168W	-0.264037	0.0010285
YDR171W	1.90175	1.09556e-12
YDR172W	-0.608769	1.43666e-17
YDR174W	0.294681	0.000105791
YDR176W	0.00175683	0.990271
YDR177W	0.0608585	0.516432
YDR178W	0.100552	0.31969
YDR179W-A	0.180133	0.308187
YDR180W	-0.990369	7.81112e-20
YDR182W	-0.104343	0.285592
YDR183W	0.343194	0.0191654
YDR188W	-0.680063	1.93459e-25
YDR189W	-0.28356	0.0025607
YDR191W	0.806881	1.04901e-06
YDR195W	0.0297237	0.806146
YDR197W	0.288886	0.0287937
YDR201W	-0.243353	0.142638
YDR204W	0.4534	0.00050779
YDR205W	0.0288547	0.826407
YDR206W	0.475921	2.35631e-07
YDR208W	-0.263006	0.00610154
YDR210W	-1.17554	3.47981e-36
YDR211W	-0.202411	0.0105365
YDR212W	-0.721575	2.17409e-25
YDR213W	0.356098	0.00169545
YDR214W	0.527848	7.37068e-11
YDR216W	2.95087	6.64924e-195
YDR221W	-0.219432	0.0328307
YDR222W	0.177861	0.224158
YDR223W	0.835999	0.0807563
YDR225W	-0.422945	7.22315e-09
YDR226W	-1.35468	1.21253e-63
YDR227W	0.483537	3.64327e-06
YDR229W	-0.283979	0.0181759
YDR232W	-0.964385	1.35486e-38
YDR234W	-0.33626	8.45919e-06
YDR235W	0.368875	0.00210907
YDR237W	-0.101069	0.38426
YDR241W	-1.07287	0.00411776
YDR242W	2.45795	7.22745e-66
YDR244W	0.13338	0.226368
YDR245W	-0.795019	3.66778e-19
YDR246W	0.233724	0.0745239
YDR247W	0.484229	0.00326424
YDR251W	0.141437	0.119656
YDR252W	-0.42582	0.0212097
YDR254W	0.753905	3.48523e-06
YDR262W	0.390337	0.000191072
YDR265W	0.979042	3.59097e-12
YDR268W	0.621265	1.17725e-06
YDR270W	-0.53019	0.00013725
YDR272W	0.332251	0.000216142
YDR273W	0.459149	0.240428
YDR275W	0.122648	0.450188
YDR279W	-0.404454	0.00137488
YDR280W	-0.249933	0.00819222
YDR285W	1.19363	2.3948e-08
YDR287W	0.209845	0.122527
YDR288W	0.230774	0.0973032
YDR291W	0.482578	0.000102726
YDR296W	0.437634	2.58958e-05
YDR297W	-0.11933	0.167696
YDR299W	-0.33802	0.000281416
YDR301W	-0.476007	2.4493e-05
YDR302W	-0.283579	0.0355306
YDR307W	0.129857	0.268597
YDR311W	-0.389205	0.000119366
YDR312W	-0.332324	0.000848144
YDR316W	0.868894	6.89075e-13
YDR317W	-0.338738	0.302897
YDR318W	1.2112	9.70965e-13
YDR321W	-0.716726	1.83657e-23
YDR322W	0.198766	0.050968
YDR325W	-0.0307353	0.817162
YDR330W	-0.168523	0.177894
YDR331W	0.166422	0.0926033
YDR332W	1.34012	5.08269e-23
YDR334W	-0.703543	5.26761e-11
YDR335W	0.0111687	0.91714
YDR336W	0.863566	5.47872e-07
YDR337W	0.119293	0.298303
YDR347W	-0.246065	0.00693643
YDR351W	0.385791	0.000443138
YDR352W	-0.929148	1.2605e-19
YDR353W	-0.463175	1.76184e-11
YDR354W	-0.117611	0.207762
YDR356W	-0.464218	7.71383e-06
YDR358W	1.19087	6.57187e-26
YDR363W	0.113247	0.41553
YDR363W-A	-0.473672	2.62195e-05
YDR367W	-0.500037	9.80091e-07
YDR368W	-0.301198	0.000402011
YDR371W	0.778913	3.86843e-11
YDR374W-A	0.38931	0.0499846
YDR376W	0.111399	0.33171
YDR377W	-0.283575	0.000804249
YDR379W	0.986122	2.48065e-20
YDR380W	1.73534	1.29072e-13
YDR381W	-0.0324997	0.673122
YDR382W	-1.41063	9.78751e-93
YDR385W	-1.11081	2.69558e-80
YDR386W	1.39463	1.90528e-23
YDR388W	-0.151099	0.0712741
YDR389W	-0.369024	0.00282219
YDR392W	0.0898551	0.524103
YDR393W	-0.0033988	0.984337
YDR394W	-0.375666	2.36088e-05
YDR395W	-0.533561	5.89437e-15
YDR398W	-0.417247	3.07252e-07
YDR399W	-0.535001	2.72608e-10
YDR401W	0.0322433	0.948915
YDR403W	2.09467	2.94535e-19
YDR405W	0.275759	0.0152902
YDR406W	1.8312	1.02857e-54
YDR409W	0.312056	0.00937383
YDR412W	-0.926612	2.28579e-19
YDR416W	-0.255959	0.0216944
YDR418W	-1.18303	2.51455e-57
YDR419W	0.0992089	0.487293
YDR420W	-0.369699	0.000173231
YDR421W	1.37411	1.27101e-26
YDR425W	0.185952	0.194851
YDR427W	0.0508033	0.532638
YDR434W	-0.206042	0.0203555
YDR436W	0.485925	4.01982e-05
YDR438W	1.21591	3.7195e-09
YDR439W	0.012005	0.943594
YDR440W	-0.226092	0.0570477
YDR444W	0.61719	4.33671e-07
YDR448W	1.11929	1.86109e-27
YDR450W	-1.21761	1.6125e-43
YDR452W	0.239293	0.00547114
YDR456W	-0.0941961	0.312049
YDR457W	0.0984046	0.316877
YDR460W	-0.349176	0.00776815
YDR461W	-7.80788	4.51159e-43
YDR462W	0.290387	0.0179633
YDR463W	-0.0373254	0.707433
YDR464W	-0.557758	4.26195e-08
YDR466W	0.434549	1.89669e-05
YDR469W	0.0066746	0.970824
YDR471W	-0.726983	1.03036e-25
YDR472W	-0.268397	0.0273786
YDR477W	-0.00394815	0.969659
YDR478W	0.221912	0.23463
YDR483W	-0.846851	4.54061e-30
YDR484W	0.161537	0.181228
YDR489W	-0.0921596	0.546424
YDR492W	0.0720737	0.483063
YDR493W	0.259385	0.0983873
YDR494W	0.246069	0.0153032
YDR499W	0.702225	4.54038e-07
YDR501W	-0.530357	0.00294776
YDR510W	-0.74901	5.15177e-16
YDR511W	0.606485	5.85722e-07
YDR513W	0.754174	2.36559e-17
YDR515W	-0.0176598	0.899373
YDR517W	-0.588901	1.40343e-08
YDR518W	-0.580743	4.18805e-08
YDR519W	-0.639729	2.85921e-11
YDR525W-A	0.815964	7.06163e-15
YDR527W	-0.482026	5.28468e-05
YDR528W	-0.530808	0.000257063
YDR531W	-0.509743	3.6588e-06
YDR536W	2.70353	0.00031989
YDR538W	-0.250728	0.0406996
YDR539W	0.302063	0.000352484
YEL073C	3.24455	7.16537e-52
YEL068C	-0.592144	0.00663592
YEL064C	0.0759558	0.679642
YEL063C	1.40252	3.61399e-35
YEL061C	-0.0458424	0.719109
YEL060C	1.18139	3.46468e-56
YEL059C-A	-0.184311	0.416163
YEL057C	1.54472	0.000687933
YEL055C	-0.839562	9.47814e-31
YEL054C	-1.45329	6.30867e-93
YEL053C	-0.06663	0.544218
YEL050C	-0.197641	0.0341721
YEL048C	-0.345914	0.0137826
YEL047C	-0.371352	6.75869e-05
YEL046C	-0.255413	0.000339303
YEL039C	2.06496	6.40147e-39
YEL037C	-1.02058	2.18807e-40
YEL036C	-0.321471	0.000232951
YEL029C	-0.131628	0.347687
YEL025C	0.726437	0.00167944
YEL023C	1.10903	1.20947e-07
YEL017C-A	-4.15705	5.32887e-285
YEL016C	0.810756	1.30752e-07
YEL009C-A	0.702633	0.423123
YEL009C	-0.282851	0.000647598
YEL008C-A	-2.59748	0.00149235
YEL005C	1.26024	1.10148e-11
YEL002C	-0.635681	7.3279e-16
YEL001C	-0.476949	1.6336e-09
YER003C	-0.744755	3.14376e-22
YER007C-A	-0.61412	9.51326e-12
YER008C	-0.013701	0.902519
YER010C	0.159002	0.296793
YER017C	0.358127	2.21389e-06
YER018C	0.319568	0.0228279
YER019C-A	-1.71786	7.01924e-44
YER026C	0.948723	7.74178e-37
YER027C	-0.722078	2.42538e-15
YER028C	-0.48148	0.0221242
YER029C	-0.422966	0.00146681
YER031C	-0.419552	3.21112e-07
YER033C	0.837068	2.11187e-11
YER036C	-0.951193	2.3006e-49
YER038C	0.137206	0.474259
YER039C	1.7429	8.15938e-07
YER043C	-0.58733	3.64376e-23
YER044C	-0.527133	3.02459e-06
YER044C-A	2.60295	3.31008e-14
YER045C	0.496764	8.22567e-05
YER047C	0.155611	0.207762
YER048C	-0.4955	1.22171e-09
YER050C	0.413742	0.000469119
YER052C	-0.0740745	0.305626
YER053C	2.16576	9.71167e-75
YER053C-A	0.69204	8.32863e-10
YER054C	3.54387	5.12358e-63
YER055C	-0.349074	2.81532e-06
YER056C	0.106461	0.160159
YER056C-A	-0.652801	1.16742e-15
YER057C	-0.607976	1.66877e-13
YER061C	0.427832	0.0025676
YER062C	0.662918	3.62468e-13
YER064C	0.61851	7.04054e-15
YER065C	0.269199	0.204888
YER071C	0.000564917	0.997122
YER075C	-0.176963	0.173486
YER076C	1.03687	4.07026e-09
YER077C	1.36551	6.20595e-51
YER078C	-0.124344	0.312201
YER082C	-0.321426	0.00104271
YER083C	-0.127485	0.192785
YER087C-B	-2.017	3.83232e-120
YER088C	0.701951	5.45634e-16
YER088C-A	-1.23024	6.05817e-15
YER089C	-0.606888	2.96231e-16
YER091C	-0.698241	5.66338e-13
YER093C	0.204244	0.0604283
YER093C-A	-0.135971	0.537442
YER094C	-0.221057	0.00319811
YER099C	0.0446852	0.645411
YER101C	1.13599	1.03525e-18
YER105C	-0.107507	0.175524
YER107C	-0.550009	5.89077e-10
YER109C	0.890408	3.9303e-10
YER110C	-1.92732	3.38497e-199
YER111C	-0.244407	0.0204302
YER113C	-0.293798	0.0111679
YER114C	-0.398971	2.37159e-05
YER115C	-0.323995	0.104814
YER116C	0.51053	0.000492896
YER118C	-0.666234	2.8428e-14
YER119C	0.101538	0.441266
YER122C	-0.445874	2.15197e-09
YER124C	0.105429	0.183639
YER126C	-0.428123	3.81495e-06
YER130C	1.00046	8.84075e-18
YER132C	-0.332954	0.00300315
YER134C	-0.117169	0.322821
YER137C	0.0350796	0.891674
YER139C	0.335964	0.0448586
YER142C	0.366469	0.0703132
YER144C	0.449265	5.10594e-05
YER145C	-1.79353	5.10253e-75
YER147C	0.275953	0.0559359
YER149C	-0.509811	5.051e-05
YER151C	-0.224599	0.0037979
YER152C	-0.338978	0.00213092
YER155C	-0.225585	0.00338947
YER156C	-0.861079	4.96827e-29
YER158C	1.17242	1.88729e-10
YER159C	0.556865	1.14337e-06
YER161C	-0.702936	6.70275e-09
YER162C	0.782802	2.78901e-07
YER163C	0.637303	1.52721e-05
YER168C	0.101385	0.275695
YER172C	0.171956	0.0584075
YER174C	-0.308518	0.0122695
YER175C	0.963603	8.24974e-16
YER180C	0.74937	5.90354e-05
YER180C-A	0.00253152	0.992566
YER183C	-0.37508	0.00408054
YER184C	1.81791	2.0842e-30
YER186C	0.403743	0.00514091
YER188C-A	-0.017916	0.9808
YEL072W	1.24972	2.58228e-12
YEL071W	-0.296756	0.000423088
YEL070W	3.30798	8.56664e-22
YEL066W	-0.30681	0.0193232
YEL065W	0.135475	0.701238
YEL062W	0.35439	0.00927315
YEL058W	-0.0784589	0.308248
YEL056W	-0.151072	0.194816
YEL052W	0.157374	0.123771
YEL051W	-0.811242	2.81025e-24
YEL049W	1.47397	3.90639e-06
YEL044W	-0.37168	0.00265306
YEL043W	-0.0755294	0.483153
YEL042W	-1.29165	2.29286e-68
YEL041W	1.83576	1.67566e-21
YEL040W	-0.640369	3.76686e-22
YEL038W	-0.586221	9.32258e-08
YEL034W	-1.25837	2.1512e-87
YEL033W	-1.54935	3.24188e-43
YEL032W	-0.219247	0.012068
YEL031W	-0.82406	9.92864e-28
YEL030W	1.20768	1.16331e-13
YEL028W	0.587204	0.0485964
YEL027W	-1.1582	1.48991e-47
YEL026W	-1.75169	9.47561e-128
YEL024W	0.073795	0.432576
YEL022W	-0.524797	3.51771e-10
YEL021W	-0.934467	3.04203e-19
YEL020W-A	-0.257435	0.0204302
YEL018W	-0.118154	0.451243
YEL017W	-0.0970667	0.466861
YEL015W	0.119902	0.16775
YEL013W	-0.485142	2.82672e-10
YEL012W	0.234721	0.130553
YEL011W	2.81578	1.09278e-164
YEL008W	1.04344	0.272748
YEL007W	-0.161473	0.071939
YEL006W	0.106174	0.416335
YEL004W	0.339832	0.0611897
YEL003W	0.143716	0.239732
YER001W	-0.466614	1.85077e-10
YER002W	-0.684554	2.8523e-13
YER004W	-0.875208	1.48886e-23
YER005W	-0.0246699	0.846603
YER006W	-0.773365	2.03651e-22
YER007W	0.518621	0.00614362
YER009W	-1.011	1.9616e-33
YER011W	-1.1515	5.68382e-08
YER012W	-0.602808	4.97515e-14
YER013W	-0.0652063	0.596754
YER014W	-0.068993	0.574907
YER015W	1.29951	3.16289e-20
YER016W	-0.369856	0.000323412
YER019W	-0.560889	5.44847e-09
YER020W	-0.0290399	0.829967
YER021W	0.141618	0.0869922
YER022W	0.021686	0.861021
YER023W	-1.08633	1.49957e-55
YER024W	1.62366	5.04605e-23
YER025W	-0.921485	2.18551e-38
YER030W	-0.90942	3.52581e-14
YER032W	0.0212821	0.865863
YER034W	0.100426	0.548989
YER035W	0.878588	3.1698e-11
YER037W	0.736523	1.47471e-11
YER038W-A	-0.59192	0.3147
YER040W	0.0503714	0.68512
YER041W	1.21361	7.26833e-17
YER042W	-0.87012	1.67434e-23
YER046W	0.0663708	0.775162
YER048W-A	-0.944558	5.04673e-19
YER049W	-0.524102	3.58048e-14
YER051W	0.512568	0.00115691
YER058W	0.131962	0.562142
YER059W	0.0310932	0.822241
YER060W	-2.24133	3.0473e-58
YER060W-A	0.297977	0.00380014
YER063W	-0.19756	0.0397244
YER066W	0.880148	6.65374e-06
YER067W	2.25448	2.07285e-21
YER068W	-0.0673617	0.486733
YER069W	0.228044	0.00339682
YER070W	0.238977	0.00058121
YER072W	-1.2495	4.69128e-67
YER073W	0.307866	7.39217e-06
YER074W	-1.11764	1.80836e-62
YER074W-A	-0.44183	0.000692383
YER076W-A	-0.579939	0.386724
YER079W	1.24814	1.3763e-12
YER080W	-0.656773	4.67338e-15
YER081W	0.590398	2.66656e-11
YER084W	0.530391	0.434155
YER086W	-0.682108	7.63418e-24
YER087W	0.362261	0.00411772
YER088W-B	-6.48718	5.33715e-05
YER090W	-0.294398	0.000157462
YER092W	0.50003	4.94506e-05
YER095W	0.0943715	0.354667
YER096W	-0.0737204	0.792786
YER098W	0.91093	3.75826e-08
YER100W	-0.626461	1.55217e-10
YER102W	-1.06748	1.09352e-55
YER103W	1.85835	1.13955e-15
YER104W	0.22733	0.168411
YER106W	0.86127	0.307221
YER112W	-0.932235	6.01132e-21
YER117W	-0.83343	2.87187e-25
YER120W	-1.18289	5.55296e-54
YER121W	2.71749	4.7699e-09
YER123W	-0.489782	2.40598e-06
YER125W	-0.565698	4.59711e-14
YER127W	-0.562222	7.59628e-08
YER128W	0.0285211	0.894045
YER129W	0.0367446	0.792965
YER131W	-1.60443	3.49861e-120
YER133W	-0.417536	5.57363e-09
YER136W	-0.724732	7.10008e-22
YER138W-A	-1.0673	4.44867e-20
YER140W	-0.342343	0.0172126
YER141W	-0.0623893	0.509179
YER143W	-0.156987	0.123302
YER146W	-0.811712	1.47705e-12
YER148W	-0.992104	9.58134e-34
YER150W	2.18881	1.64452e-27
YER154W	-0.459906	6.41916e-07
YER157W	-0.21331	0.0330573
YER164W	-0.343421	9.30187e-05
YER165W	-1.89646	1.25795e-173
YER166W	0.0177785	0.864182
YER167W	0.095886	0.419554
YER169W	0.200413	0.114006
YER170W	-0.123912	0.463316
YER171W	0.0232721	0.823822
YER173W	1.12054	2.58674e-16
YER175W-A	-0.932376	0.164127
YER176W	-0.296563	0.00410767
YER177W	-0.221367	0.0127361
YER178W	-0.891064	1.00482e-28
YER179W	0.662695	0.0747481
YER182W	0.360684	0.00610469
YER187W	-0.817681	0.187609
YER188W	0.7277	0.0532557
YFL057C	3.02891	2.37886e-60
YFL054C	1.85121	2.67438e-36
YFL050C	1.8267	2.15734e-41
YFL048C	0.0454052	0.592014
YFL045C	-1.13747	1.177e-60
YFL044C	0.605831	1.41289e-09
YFL042C	0.672401	1.65921e-08
YFL039C	-0.967651	2.9778e-54
YFL038C	-0.190553	0.0206648
YFL034C-B	-0.307797	0.00765723
YFL034C-A	0.460121	2.00033e-05
YFL033C	0.490657	1.09689e-07
YFL029C	0.359967	0.0151465
YFL028C	0.297368	0.00421084
YFL027C	-0.0972166	0.5089
YFL025C	-0.567458	2.85432e-07
YFL024C	0.525337	3.08289e-05
YFL022C	-0.890249	8.95702e-39
YFL021C-A	1.76835	0.0716834
YFL020C	2.42766	1.28642e-06
YFL018C	-0.0586767	0.457746
YFL017C	0.361212	0.0018522
YFL016C	0.171435	0.066257
YFL013C	0.32162	0.00151992
YFL010C	-0.561777	5.24564e-11
YFL003C	-0.283274	0.571764
YFL002C	-0.0472301	0.648637
YFR003C	0.578608	1.31319e-06
YFR005C	0.701949	1.126e-11
YFR011C	0.0473354	0.705487
YFR014C	0.848463	7.27135e-15
YFR015C	2.72416	2.54935e-31
YFR016C	0.141135	0.135817
YFR017C	2.66494	6.09117e-46
YFR018C	0.0381454	0.75014
YFR024C-A	-0.332141	0.000209147
YFR025C	-0.327347	0.00827864
YFR026C	0.433435	0.183072
YFR028C	-0.389968	4.10743e-05
YFR031C	0.207107	0.109179
YFR031C-A	-0.97468	3.6837e-36
YFR032C-A	-1.19581	1.44746e-48
YFR033C	-0.544459	3.20566e-09
YFR034C	0.173988	0.159976
YFR037C	-0.221593	0.00469996
YFR039C	-0.525736	1.25492e-06
YFR041C	0.359527	0.000732098
YFR043C	0.131462	0.477387
YFR044C	-0.387166	6.53184e-07
YFR046C	1.08405	1.13677e-11
YFR047C	-0.542962	9.29796e-08
YFR050C	-0.233312	0.00629507
YFR051C	-0.437877	1.26893e-08
YFR053C	3.19131	1.1847e-37
YFL055W	1.63149	2.52642e-14
YFL053W	1.58983	0.011085
YFL052W	2.90729	2.10372e-37
YFL049W	1.18789	2.30592e-29
YFL047W	-0.08499	0.408869
YFL046W	-0.116204	0.421996
YFL041W-A	-0.807045	0.136409
YFL041W	-0.772105	3.3695e-17
YFL037W	-1.1247	2.54155e-67
YFL036W	-0.0724349	0.384391
YFL034W	-0.0308269	0.80241
YFL031W	-1.19084	2.41163e-45
YFL030W	2.16779	1.16435e-23
YFL026W	-4.8633	0
YFL023W	-0.651509	4.07026e-09
YFL021W	-0.112824	0.306283
YFL017W-A	-0.436864	0.00788547
YFL014W	5.58853	0
YFL011W	-0.568318	0.434845
YFL009W	-0.18324	0.0629209
YFL008W	0.0201099	0.849568
YFL007W	-0.19844	0.0130704
YFL005W	-0.751603	2.5073e-19
YFL004W	-1.12346	9.3219e-57
YFL001W	-0.355204	0.00872597
YFR001W	-0.581293	4.6766e-09
YFR002W	-0.194252	0.0144856
YFR004W	-0.119508	0.165021
YFR006W	0.0921172	0.270655
YFR007W	0.534536	0.000151812
YFR008W	0.389152	0.0270471
YFR009W	-0.30082	2.72688e-05
YFR010W	0.160069	0.0400696
YFR013W	-0.157968	0.119537
YFR019W	0.652292	3.95584e-13
YFR020W	0.395364	0.102962
YFR021W	-0.480393	0.000139999
YFR022W	1.30117	8.07127e-18
YFR023W	0.45041	0.580721
YFR027W	0.356073	0.0716565
YFR029W	-0.00345936	0.984413
YFR030W	-0.558844	2.25424e-14
YFR034W-A	-2.69892	1.46595e-22
YFR038W	0.0806515	0.485326
YFR040W	0.0436268	0.671641
YFR042W	0.182074	0.238767
YFR045W	0.614893	0.000164614
YFR048W	0.0817188	0.51988
YFR049W	-0.650757	5.11401e-08
YFR052W	-0.0486094	0.595887
YFR055W	-0.275714	0.00871644
YGL257C	-0.105231	0.421859
YGL252C	0.141214	0.12987
YGL251C	1.67929	8.87505e-37
YGL246C	0.114565	0.36221
YGL242C	-0.148099	0.156591
YGL237C	0.0454757	0.775171
YGL236C	-0.229131	0.115453
YGL231C	-0.00803399	0.951527
YGL230C	0.840838	0.213114
YGL229C	0.181895	0.293683
YGL226C-A	-1.38335	4.38001e-09
YGL224C	0.19193	0.110774
YGL223C	0.713711	2.17054e-10
YGL222C	1.22152	2.08263e-31
YGL221C	-0.162465	0.13287
YGL219C	0.332112	0.000909294
YGL213C	-0.32241	0.000924088
YGL206C	-0.815096	6.41677e-39
YGL204C	-3.83669	2.48326e-75
YGL203C	-0.27489	0.00225208
YGL201C	-0.10391	0.225149
YGL200C	-1.19737	5.41034e-43
YGL199C	0.810955	0.391809
YGL194C-A	-0.0915884	0.707433
YGL194C	0.260848	0.0269032
YGL193C	2.14502	2.28794e-13
YGL190C	-0.467461	8.0873e-07
YGL189C	-1.15732	3.92239e-50
YGL187C	-0.225619	0.00211583
YGL186C	-0.588337	1.19291e-10
YGL185C	0.788003	3.32764e-08
YGL184C	0.172186	0.231574
YGL179C	0.123345	0.583013
YGL176C	0.128699	0.466383
YGL175C	0.55704	0.0274913
YGL173C	-0.160232	0.0205073
YGL167C	-0.479781	1.00201e-10
YGL165C	-0.457009	0.658424
YGL164C	0.102959	0.497081
YGL163C	0.421301	7.20295e-05
YGL161C	0.0968816	0.329414
YGL154C	1.16298	1.64496e-07
YGL150C	-0.103191	0.210543
YGL147C	-0.95735	5.69143e-36
YGL146C	1.63644	3.92524e-07
YGL144C	-0.0666159	0.728134
YGL143C	0.113502	0.419591
YGL142C	-0.255992	0.0142687
YGL140C	-0.148741	0.0799005
YGL136C	0.646858	0.00185785
YGL131C	0.821075	4.97487e-14
YGL129C	-0.19957	0.0670644
YGL128C	0.946127	1.10679e-07
YGL127C	-0.44968	0.0102143
YGL124C	0.65121	3.39193e-07
YGL122C	-0.821247	1.71419e-26
YGL121C	2.80632	5.38221e-30
YGL120C	-0.855122	7.53771e-32
YGL112C	0.0225975	0.847757
YGL110C	0.482637	0.000296752
YGL108C	-0.257009	0.151229
YGL107C	0.090901	0.354513
YGL104C	1.31171	1.41669e-14
YGL095C	0.526727	1.18152e-06
YGL094C	-0.259537	0.00608145
YGL091C	0.428511	0.000135564
YGL089C	4.54891	1.86085e-23
YGL087C	0.15247	0.227119
YGL084C	-0.348588	0.000669058
YGL078C	-0.952788	3.57107e-37
YGL077C	-0.590653	1.00573e-10
YGL076C	-1.10944	6.87192e-50
YGL075C	-0.244985	0.183283
YGL072C	-1.60768	0.00017882
YGL070C	-0.376555	0.000301377
YGL065C	-0.11746	0.238037
YGL064C	0.296915	0.0144715
YGL061C	-0.280126	0.0570714
YGL057C	0.186019	0.217205
YGL056C	0.585266	1.22768e-12
YGL054C	-0.957143	7.15915e-30
YGL049C	-0.337822	1.05708e-05
YGL048C	-0.0899598	0.226728
YGL044C	-0.387597	0.00100389
YGL040C	-0.713914	9.1719e-15
YGL038C	0.296274	0.0029342
YGL037C	1.65411	6.81611e-62
YGL035C	-0.000954353	0.993478
YGL032C	-6.94289	2.56343e-29
YGL031C	-1.15267	9.81308e-65
YGL028C	-0.041694	0.635968
YGL027C	-0.603428	1.58776e-15
YGL026C	-0.0976795	0.198369
YGL025C	-0.0799241	0.569198
YGL023C	-0.229072	0.0385983
YGL020C	-0.334097	0.000775964
YGL018C	0.342861	0.0281449
YGL013C	0.265909	0.00352077
YGL011C	-0.274363	0.000378776
YGL009C	0.0717475	0.750489
YGL008C	-0.744015	1.74997e-19
YGL007C-A	-6.50279	1.75546e-48
YGL005C	0.165411	0.270616
YGL004C	0.109221	0.466861
YGL003C	0.346186	0.0108959
YGL001C	-0.21301	0.0138028
YGR001C	-0.203668	0.0196834
YGR002C	0.12278	0.302897
YGR005C	-0.239086	0.0180694
YGR008C	1.47562	1.27951e-35
YGR009C	0.181387	0.0553235
YGR015C	0.821822	2.51329e-06
YGR020C	-1.42313	1.06523e-51
YGR024C	0.395979	0.00133026
YGR027C	-0.962096	6.22872e-32
YGR030C	0.437248	0.00267089
YGR033C	-0.298211	0.00328649
YGR035C	-1.63013	3.4191e-15
YGR036C	-0.816303	5.47726e-10
YGR037C	-1.44237	9.07293e-82
YGR043C	2.95624	2.45685e-29
YGR044C	-0.132939	0.224501
YGR045C	1.39566	0.0134163
YGR047C	0.177924	0.111163
YGR050C	-0.0697971	0.903897
YGR053C	1.33706	0.00139571
YGR057C	0.818347	7.05805e-09
YGR061C	-0.912348	5.24699e-48
YGR062C	-0.383704	0.025636
YGR063C	0.232731	0.0384974
YGR065C	0.312047	0.00697946
YGR067C	2.01162	3.99305e-13
YGR068C	0.494245	3.16118e-05
YGR071C	0.0815751	0.528224
YGR073C	0.699367	0.141777
YGR075C	1.10182	4.04472e-10
YGR076C	0.354328	0.0109847
YGR077C	0.0935147	0.434984
YGR078C	-0.753137	2.96947e-15
YGR081C	-0.0724853	0.551324
YGR083C	-0.303286	5.57888e-05
YGR084C	0.458938	0.00012943
YGR085C	-0.881161	5.98335e-29
YGR086C	-0.0760199	0.330069
YGR087C	1.13191	0.0146844
YGR095C	-0.456251	3.59197e-05
YGR098C	-0.0315725	0.805348
YGR102C	0.339303	0.0190908
YGR104C	0.115727	0.465282
YGR106C	-1.0892	1.27451e-39
YGR109C	0.941306	9.0347e-09
YGR117C	0.238522	0.0811737
YGR119C	-0.45026	3.20551e-06
YGR120C	0.0140089	0.927729
YGR121C	-0.340616	0.0136571
YGR122C-A	-0.201963	0.558612
YGR123C	-1.42214	7.34201e-71
YGR128C	-0.596338	2.22044e-10
YGR130C	0.377401	2.41388e-05
YGR132C	-0.234968	0.02105
YGR138C	0.316848	0.0079924
YGR146C	-0.239547	0.069332
YGR146C-A	-3.49964	0.00494861
YGR147C	-0.454571	0.000165796
YGR148C	-1.08589	4.34681e-60
YGR150C	0.0416135	0.739315
YGR154C	2.11138	2.02292e-34
YGR158C	-0.781647	2.54626e-14
YGR159C	-1.01509	1.44333e-32
YGR161C	1.88907	6.63731e-94
YGR168C	1.76499	1.71325e-30
YGR169C	0.167095	0.346256
YGR169C-A	-1.23632	5.4887e-24
YGR171C	0.14941	0.305339
YGR172C	-0.0770174	0.484357
YGR174C	1.05434	1.65166e-12
YGR175C	-0.417756	5.7578e-09
YGR177C	-0.804121	1.28238e-15
YGR178C	-0.443617	4.35618e-09
YGR179C	0.505263	0.00114604
YGR180C	-0.839221	2.53444e-25
YGR182C	0.154836	0.341444
YGR183C	-0.182302	0.157677
YGR184C	-0.0746045	0.378053
YGR185C	-0.309361	1.73504e-05
YGR187C	-0.718634	3.08298e-17
YGR188C	0.00976089	0.959436
YGR189C	0.875985	1.72598e-40
YGR192C	-1.04277	1.55168e-31
YGR193C	-0.150625	0.0822161
YGR194C	1.46946	2.70843e-29
YGR196C	0.13997	0.230233
YGR197C	0.206522	0.157883
YGR200C	-0.397284	2.32907e-06
YGR201C	-0.0393298	0.842638
YGR202C	-0.167897	0.0926725
YGR207C	0.650945	5.89235e-11
YGR209C	-0.120564	0.170157
YGR210C	-0.345245	0.000106992
YGR213C	2.18397	1.43965e-20
YGR216C	0.173334	0.210543
YGR220C	0.279794	0.0035261
YGR221C	0.497033	0.0057085
YGR223C	0.921979	4.62608e-11
YGR229C	-0.303522	0.00159014
YGR231C	-0.279014	0.000329713
YGR233C	-0.257701	0.00151095
YGR235C	0.726173	3.23855e-11
YGR236C	0.982761	0.237636
YGR237C	0.475788	4.32163e-05
YGR238C	0.914069	4.3076e-12
YGR239C	1.06304	3.59379e-17
YGR240C	-0.959616	4.26741e-43
YGR241C	-0.335589	0.000214753
YGR244C	0.518761	3.81456e-11
YGR245C	-0.771419	4.10948e-23
YGR246C	0.38708	0.000725929
YGR250C	0.154284	0.130418
YGR253C	0.370696	7.66482e-07
YGR255C	0.0847091	0.447885
YGR257C	0.0865558	0.522374
YGR258C	0.763703	6.46621e-11
YGR259C	4.40027	5.11767e-15
YGR261C	-0.126215	0.150923
YGR262C	0.031437	0.819984
YGR263C	0.185948	0.295189
YGR264C	-0.490945	2.30454e-13
YGR267C	-0.539231	7.10699e-11
YGR268C	-0.09333	0.535158
YGR271C-A	-0.52834	3.09122e-06
YGR274C	-0.0378408	0.754072
YGR276C	-0.555464	4.13881e-08
YGR277C	-0.402384	0.00187441
YGR279C	-0.624334	3.29987e-21
YGR280C	-0.742607	6.54836e-11
YGR282C	0.350216	6.78708e-07
YGR283C	-0.587885	2.73828e-06
YGR284C	-0.341586	2.55673e-05
YGR285C	-0.969229	4.43232e-36
YGR286C	-1.36482	4.71851e-28
YGR287C	0.856187	1.17317e-06
YGR289C	2.22565	2.50249e-34
YGL258W	-3.68501	0.0014238
YGL256W	0.413541	0.000443368
YGL255W	-0.48625	4.8832e-05
YGL254W	0.160342	0.266232
YGL253W	-1.22034	2.67279e-88
YGL250W	0.602784	0.0023168
YGL248W	1.49727	7.64631e-37
YGL247W	0.854926	8.05835e-07
YGL245W	-0.801183	8.91628e-36
YGL244W	-0.28812	0.000361037
YGL243W	1.24924	1.06568e-18
YGL241W	0.0319428	0.754382
YGL240W	0.845807	0.00026325
YGL238W	-0.185568	0.0107076
YGL234W	-0.637209	4.09711e-14
YGL233W	-0.121078	0.194171
YGL232W	-0.559893	3.72774e-08
YGL228W	-0.349762	7.14661e-06
YGL227W	0.499332	2.8467e-06
YGL226W	0.606787	0.00285143
YGL225W	-0.893345	3.10565e-32
YGL220W	-0.767342	3.64072e-13
YGL216W	-0.136694	0.21416
YGL215W	-1.38438	1.01468e-55
YGL212W	0.733349	2.07938e-06
YGL211W	0.52206	6.54929e-07
YGL210W	-0.374205	0.00190078
YGL209W	-0.468289	0.00194139
YGL208W	0.477768	0.000741364
YGL207W	-0.298543	0.000106011
YGL205W	3.45586	1.15013e-16
YGL202W	-1.00733	7.90171e-40
YGL198W	0.285652	0.00629423
YGL197W	0.35785	9.32807e-05
YGL196W	-0.326228	0.0025575
YGL195W	-0.324597	9.85377e-07
YGL191W	0.444117	4.43408e-09
YGL181W	0.118259	0.210543
YGL180W	0.0571122	0.700985
YGL178W	-0.0105008	0.923824
YGL174W	0.0194414	0.919373
YGL172W	-0.475757	1.04026e-07
YGL171W	-0.71666	2.3009e-14
YGL169W	-0.315246	0.00330781
YGL166W	-0.0690696	0.68207
YGL162W	0.360743	0.0187582
YGL160W	-0.104335	0.343353
YGL159W	0.114251	0.431054
YGL158W	1.24599	0.0256088
YGL157W	0.0888579	0.34926
YGL156W	2.41211	4.89706e-94
YGL155W	-0.124257	0.27771
YGL153W	-0.255335	0.0484049
YGL151W	0.285627	0.00601862
YGL148W	-0.791354	5.31233e-22
YGL145W	0.00567283	0.963845
YGL141W	0.759953	2.12735e-12
YGL139W	-0.430664	1.34192e-06
YGL137W	-0.605409	8.65422e-19
YGL135W	-1.13726	3.48503e-41
YGL134W	0.949909	4.82968e-08
YGL133W	0.126401	0.223228
YGL130W	0.155382	0.150448
YGL125W	1.63683	1.11592e-68
YGL123W	-1.3352	4.7649e-80
YGL119W	-0.339153	0.00359334
YGL117W	0.683744	2.72394e-06
YGL116W	0.323827	0.00131945
[truncated: 3,487 more rows]

## Sheet: mRNA_up and mRNA_dn
mRNA_up_dcp2	gene_ID	log2FC mRNA dcp2 vs WT		mRNA_dn	gene_ID	log2FC mRNA dcp2 vs WT
FDR < 0.1	YPL187W	10.9468		FDR < 0.1	YNL145W	-13.9318
FC > 1.4	YKL178C	5.71682		FC < 1.4	YJL047C-A	-11.3483
n=1376	YFL014W	5.58853		n=1281	YCR097W	-10.8477
	YOR178C	4.96367			YOR041C	-10.7749
	YGL089C	4.54891			YAL004W	-10.7475
	YGR248W	4.4372			YOR121C	-10.1686
	YGR259C	4.40027			YPR087W	-8.70584
	YBL043W	4.3619			YOR102W	-8.69203
	YPR160W	4.34846			YDL009C	-7.82247
	YLR327C	4.33611			YDR461W	-7.80788
	YHL024W	4.27609			YPL135C-A	-7.62698
	YCR021C	4.19703			YJL170C	-7.46524
	YIL160C	4.08005			YOR053W	-7.25799
	YKL217W	3.90505			YGL032C	-6.94289
	YBL048W	3.78148			YGL007C-A	-6.50279
	YIL101C	3.75714			YER088W-B	-6.48718
	YPR007C	3.75494			YIL015W	-6.30643
	YOR120W	3.73298			YLR342W-A	-6.22262
	YJL161W	3.67634			YOR218C	-6.15775
	YOL052C-A	3.65917			YIR018C-A	-5.72661
	YNR073C	3.57879			YLR412C-A	-5.49367
	YGR224W	3.55875			YLR120W-A	-5.17544
	YER054C	3.54387			YFL026W	-4.8633
	YBR033W	3.52921			YJL028W	-4.85654
	YOR202W	3.51067			YNL097C-B	-4.82317
	YGL205W	3.45586			YKR047W	-4.6931
	YDR018C	3.41802			YDR281C	-4.667
	YIL099W	3.32972			YBL070C	-4.53516
	YLR312C	3.32717			YMR182W-A	-4.38318
	YHR087W	3.32563			YEL017C-A	-4.15705
	YEL070W	3.30798			YDL184C	-4.11706
	YEL073C	3.24455			YGL204C	-3.83669
	YOR100C	3.24194			YGR139W	-3.73746
	YCL040W	3.21627			YGL258W	-3.68501
	YLR031W	3.19276			YDL133C-A	-3.6459
	YFR053C	3.19131			YAR019W-A	-3.58134
	YJR095W	3.15702			YGR146C-A	-3.49964
	YMR105C	3.15307			YNL146C-A	-3.49195
	YBR072W	3.13196			YJL077W-B	-3.4283
	YPL171C	3.06854			YBR292C	-3.33398
	YPL186C	3.06378			YKL209C	-3.27432
	YHL016C	3.0356			YLR349W	-3.27367
	YFL057C	3.02891			YHR049C-A	-3.25442
	YJR008W	2.9944			YOR384W	-3.24617
	YGR043C	2.95624			YGL006W-A	-3.17165
	YDR216W	2.95087			YOR381W-A	-3.13906
	YCR007C	2.95064			YJL077W-A	-2.96827
	YMR250W	2.93217			YLR041W	-2.91283
	YNR034W-A	2.92855			YLR271W	-2.89113
	YPR030W	2.92746			YKL106C-A	-2.83482
	YNR002C	2.9099			YNR060W	-2.75051
	YAL061W	2.90986			YHR215W	-2.73212
	YFL052W	2.90729			YDR524C-A	-2.72644
	YLR149C	2.9065			YFR034W-A	-2.69892
	YML128C	2.90585			YMR058W	-2.69018
	YJR004C	2.89536			YLR285C-A	-2.6831
	YGR070W	2.89398			YLR214W	-2.67891
	YML042W	2.88246			YAR071W	-2.65653
	YJL116C	2.87559			YEL008C-A	-2.59748
	YGR032W	2.87394			YML007C-A	-2.55851
	YJL106W	2.8223			YKL084W	-2.5144
	YEL011W	2.81578			YBR263W	-2.44182
	YGL121C	2.80632			YDL061C	-2.42184
	YCR089W	2.79098			YOL038C-A	-2.40365
	YMR196W	2.77426			YMR266W	-2.32196
	YGR243W	2.77326			YKL044W	-2.28768
	YGR088W	2.76627			YER060W	-2.24133
	YCR091W	2.75248			YLR264W	-2.21781
	YCL048W	2.74378			YDL232W	-2.21221
	YFR015C	2.72416			YKL043W	-2.20815
	YBR298C	2.72326			YHR094C	-2.18252
	YER121W	2.71749			YJL152W	-2.12596
	YML054C	2.70929			YHR007C-A	-2.11547
	YKR061W	2.70559			YMR006C	-2.11282
	YMR118C	2.70437			YJL189W	-2.09862
	YDR536W	2.70353			YDR086C	-2.07686
	YKR097W	2.6775			YPR124W	-2.06131
	YNL202W	2.67541			YLR213C	-2.06097
	YHL012W	2.67289			YJR120W	-2.04151
	YFR017C	2.66494			YDR276C	-2.04092
	YGR292W	2.66188			YOL150C	-2.0403
	YLR311C	2.65767			YOR309C	-2.0243
	YHR022C	2.65363			YER087C-B	-2.017
	YKR058W	2.65197			YIL100W	-1.97961
	YDL021W	2.64835			YLR388W	-1.96437
	YMR007W	2.63007			YKL169C	-1.94406
	YDR034W-B	2.61704			YJR018W	-1.93121
	YBR186W	2.61572			YER110C	-1.92732
	YML100W	2.61514			YHL002C-A	-1.92353
	YER044C-A	2.60295			YOR236W	-1.91469
	YJL153C	2.59978			YLR402W	-1.91354
	YDR024W	2.59872			YER165W	-1.89646
	YIR039C	2.59316			YBR085W	-1.89579
	YDL221W	2.5829			YLR262C-A	-1.87539
	YBR299W	2.57388			YOL039W	-1.85651
	YKL071W	2.57284			YOR032W-A	-1.85573
	YDR343C	2.56782			YDL085C-A	-1.85356
	YOR348C	2.5642			YJL043W	-1.85
	YDR342C	2.55255			YGR105W	-1.82233
	YDL094C	2.54542			YPR054W	-1.81161
	YCL018W	2.54198			YML089C	-1.80804
	YPL017C	2.5382			YLR325C	-1.80565
	YPR002W	2.52905			YIL114C	-1.79666
	YKL188C	2.52175			YER145C	-1.79353
	YLR040C	2.51785			YIR030C	-1.79126
	YCL049C	2.51234			YMR086C-A	-1.77974
	YNL117W	2.50764			YLR179C	-1.76097
	YCR073C	2.50742			YNL277W-A	-1.7604
	YMR291W	2.50655			YIL163C	-1.75731
	YMR081C	2.49413			YEL026W	-1.75169
	YMR090W	2.4905			YKL036C	-1.74852
	YDR391C	2.48915			YML058W-A	-1.73846
	YMR107W	2.46094			YIL008W	-1.71816
	YLR267W	2.46083			YER019C-A	-1.71786
	YDR242W	2.45795			YNL162W-A	-1.71009
	YCR014C	2.45048			YOL013W-A	-1.70835
	YCR020C	2.4461			YBR099C	-1.70668
	YBR043C	2.44581			YJL121C	-1.69757
	YFL020C	2.42766			YDL081C	-1.69012
	YGL156W	2.41211			YBR011C	-1.68714
	YCR106W	2.4079			YPR150W	-1.68069
	YHR209W	2.40311			YKL004W	-1.68003
	YOL126C	2.39805			YDL066W	-1.67834
	YIL136W	2.39553			YOR095C	-1.67245
	YOR062C	2.39285			YMR217W	-1.67211
	YKL086W	2.3883			YKL056C	-1.65662
	YKL026C	2.38658			YLR124W	-1.65504
	YGR052W	2.38419			YPL056C	-1.65182
	YCR107W	2.36505			YOR235W	-1.64132
	YMR065W	2.36355			YGR035C	-1.63013
	YJR155W	2.35931			YOR293W	-1.6205
	YNL014W	2.35227			YOL152W	-1.61677
	YOR009W	2.34746			YLR029C	-1.60996
	YDL243C	2.34594			YGL072C	-1.60768
	YOR374W	2.32958			YER131W	-1.60443
	YMR189W	2.31858			YCL064C	-1.59199
	YKL220C	2.30328			YNL095C	-1.5895
	YLR258W	2.28799			YLR287C-A	-1.5816
	YLR010C	2.28422			YLR354C	-1.58079
	YCR037C	2.28416			YLR048W	-1.56618
	YPL230W	2.27823			YOR071C	-1.5661
	YNL160W	2.27256			YLR043C	-1.56084
	YMR175W	2.26207			YML106W	-1.56019
	YMR180C	2.26054			YOR186W	-1.55473
	YMR085W	2.25545			YJL177W	-1.55002
	YER067W	2.25448			YEL033W	-1.54935
	YMR169C	2.25264			YBR106W	-1.54814
	YOR173W	2.25016			YKL053W	-1.54799
	YKL161C	2.23051			YKL080W	-1.53749
	YDL204W	2.2299			YHL015W	-1.5247
	YGR289C	2.22565			YMR013W-A	-1.51991
	YBR018C	2.22539			YDR441C	-1.51821
	YIR031C	2.22021			YHR193C	-1.51588
	YOR289W	2.20006			YNL066W	-1.51436
	YNL093W	2.19468			YJL080C	-1.51405
	YER150W	2.18881			YNL070W	-1.51299
	YLR178C	2.18482			YLR150W	-1.50698
	YGR213C	2.18397			YDR524C-B	-1.50679
	YNL274C	2.17281			YIL053W	-1.48983
	YFL030W	2.16779			YNL087W	-1.48895
	YER053C	2.16576			YOL040C	-1.48099
	YIL066C	2.16404			YLR112W	-1.47953
	YMR251W	2.15716			YBL081W	-1.47639
	YPL148C	2.15504			YBR048W	-1.45709
	YKR091W	2.15474			YLR448W	-1.45389
	YCR015C	2.14523			YEL054C	-1.45329
	YGL193C	2.14502			YDR008C	-1.44617
	YNR058W	2.12018			YHR072W-A	-1.44439
	YDR082W	2.12015			YKL214C	-1.44381
	YJL110C	2.11481			YBR213W	-1.44274
	YGR154C	2.11138			YGR037C	-1.44237
	YDL169C	2.10984			YOR210W	-1.43325
	YDR403W	2.09467			YJL190C	-1.43121
	YOR128C	2.09413			YKL060C	-1.42477
	YIR028W	2.09316			YLR126C	-1.42353
	YCR036W	2.09279			YGR020C	-1.42313
	YCL004W	2.09271			YGR123C	-1.42214
	YMR206W	2.08895			YKL180W	-1.42125
	YBL064C	2.08252			YCL021W-A	-1.41428
	YBR183W	2.07102			YDL171C	-1.41176
	YMR017W	2.06903			YDR382W	-1.41063
	YLL060C	2.06888			YAL003W	-1.38878
	YDL244W	2.06594			YGL215W	-1.38438
	YEL039C	2.06496			YGL226C-A	-1.38335
	YDL085W	2.05677			YLR378C	-1.38243
	YCR005C	2.04266			YJL205C	-1.38046
	YKL107W	2.0342			YNL067W	-1.37986
	YOL157C	2.02945			YPR086W	-1.3765
	YHR033W	2.02445			YKR059W	-1.37228
	YMR103C	2.02143			YKR057W	-1.36993
	YKL163W	2.01806			YGR286C	-1.36482
	YGR067C	2.01162			YGR260W	-1.3628
	YDR019C	2.00712			YPL249C-A	-1.35762
	YKL221W	2.00073			YDR226W	-1.35468
	YDL215C	1.98987			YNL244C	-1.35464
	YNL109W	1.97797			YDL227C	-1.35179
	YML050W	1.96458			YJR010C-A	-1.34688
	YOR208W	1.96442			YHR143W-A	-1.34553
	YJR154W	1.95624			YBL092W	-1.34538
	YML118W	1.94975			YKL127W	-1.34518
	YNR068C	1.94522			YBR058C-A	-1.34404
	YPR005C	1.93494			YDL129W	-1.34166
	YHR211W	1.92884			YLR136C	-1.34117
	YIR029W	1.92051			YNL024C-A	-1.3378
	YOR328W	1.91956			YPR074C	-1.33672
	YGR064W	1.91129			YGL123W	-1.3352
	YJR156C	1.90633			YPR069C	-1.3345
	YBR284W	1.90496			YLR413W	-1.33388
	YDR171W	1.90175			YOR159C	-1.33361
	YNL144C	1.89581			YHR042W	-1.3334
	YGR161C	1.88907			YPR009W	-1.33272
	YPR184W	1.88792			YJL138C	-1.33048
	YCR098C	1.88437			YHR021C	-1.32835
	YCL010C	1.88389			YNL079C	-1.32683
	YJL216C	1.87824			YLR180W	-1.32669
	YLR318W	1.87522			YJR147W	-1.31931
	YBR169C	1.87351			YCR024C-B	-1.31662
	YLR174W	1.86326			YPL106C	-1.31654
	YDR007W	1.86117			YML126C	-1.31008
	YER103W	1.85835			YDL130W	-1.30871
	YIL013C	1.85767			YHR174W	-1.30574
	YOR273C	1.85511			YHR029C	-1.30517
	YLR152C	1.85305			YOL120C	-1.30496
	YIR042C	1.85183			YML074C	-1.3034
	YFL054C	1.85121			YJR025C	-1.2969
	YOR019W	1.84863			YKL138C-A	-1.29674
	YMR271C	1.84441			YJR070C	-1.29608
	YOL164W	1.84433			YNL190W	-1.29555
	YEL041W	1.83576			YNL175C	-1.29296
	YDR406W	1.8312			YEL042W	-1.29165
	YFL050C	1.8267			YPL037C	-1.29021
	YER184C	1.81791			YPL019C	-1.29021
	YHL021C	1.81268			YGL030W	-1.28764
	YNR069C	1.80892			YLR406C	-1.28563
	YDR077W	1.80451			YMR230W	-1.28471
	YCR068W	1.80331			YJL217W	-1.2838
	YPR001W	1.80005			YBR187W	-1.28371
	YCL039W	1.79861			YOL052C	-1.28107
	YDR055W	1.79681			YDR540C	-1.28096
	YIL029C	1.79676			YBR162W-A	-1.28011
	YBR019C	1.78221			YGR162W	-1.27944
	YBR270C	1.77606			YLR110C	-1.27598
	YPL223C	1.77264			YBL087C	-1.27312
	YFL021C-A	1.76835			YMR241W	-1.27219
	YPR026W	1.76693			YDR454C	-1.27041
	YPL113C	1.76617			YOR332W	-1.26586
	YGR168C	1.76499			YJL022W	-1.26018
	YAL028W	1.76128			YEL034W	-1.25837
	YGR256W	1.75942			YIL069C	-1.25019
	YJL132W	1.75542			YPL131W	-1.24999
	YLR165C	1.74806			YER072W	-1.2495
	YLR263W	1.74511			YGR060W	-1.24907
	YER039C	1.7429			YBL028C	-1.24866
	YCR076C	1.7422			YHR216W	-1.24847
	YBR147W	1.74071			YJR137C	-1.24649
	YAL063C	1.74038			YNR004W	-1.24552
	YKL187C	1.73971			YGR034W	-1.24156
	YDR534C	1.73891			YDL075W	-1.24106
	YDR380W	1.73534			YGR169C-A	-1.23632
	YNL289W	1.72432			YBR084W	-1.2352
	YLR151C	1.72326			YKL191W	-1.23387
	YMR018W	1.70913			YLR363W-A	-1.23248
	YLR142W	1.70741			YJL148W	-1.232
	YHL035C	1.70531			YMR215W	-1.23169
	YCL056C	1.70191			YHR020W	-1.23142
	YDL197C	1.70111			YOR369C	-1.23042
	YIL165C	1.69784			YER088C-A	-1.23024
	YNR059W	1.69419			YDL082W	-1.22829
	YPL088W	1.69409			YGR214W	-1.22751
	YCR038C	1.69236			YMR303C	-1.22595
	YOR381W	1.68788			YNL302C	-1.22593
	YOL159C	1.68518			YMR042W	-1.22277
	YIL111W	1.68499			YOL064C	-1.22257
	YOR380W	1.68351			YHR089C	-1.2217
	YGL251C	1.67929			YGL253W	-1.22034
	YJL199C	1.67465			YKL001C	-1.22007
	YCL038C	1.67327			YML051W	-1.219
	YLL057C	1.66969			YGL099W	-1.21888
	YOR365C	1.6692			YDR450W	-1.21761
	YBL075C	1.6676			YDR144C	-1.21653
	YMR114C	1.6669			YLL045C	-1.21486
	YKL050C	1.6661			YOR294W	-1.21116
	YDL199C	1.66559			YNL292W	-1.20321
	YDR009W	1.66312			YPL192C	-1.20321
	YCR105W	1.66289			YLR061W	-1.19832
	YDR258C	1.6606			YGL200C	-1.19737
	YDL109C	1.65938			YOR099W	-1.19604
	YGL037C	1.65411			YFR032C-A	-1.19581
	YAR050W	1.65332			YNL259C	-1.19346
	YBR293W	1.65172			YDR500C	-1.19287
	YBR008C	1.64955			YOR085W	-1.19186
	YIR019C	1.64856			YFL031W	-1.19084
	YPL066W	1.64768			YAR029W	-1.1905
	YDR058C	1.64595			YNL178W	-1.18977
	YOR060C	1.64018			YOR167C	-1.18788
	YNL279W	1.63835			YDL083C	-1.18763
	YGL125W	1.63683			YDR418W	-1.18303
	YGL146C	1.63644			YER120W	-1.18289
	YMR170C	1.63586			YBR084C-A	-1.18283
	YLL039C	1.63358			YMR274C	-1.17978
	YHR137W	1.63244			YDR210W	-1.17554
	YFL055W	1.63149			YLR249W	-1.17424
	YPL258C	1.62959			YJR017C	-1.17376
	YJL133C-A	1.62893			YDL014W	-1.17339
	YOL091W	1.6256			YLR340W	-1.17031
	YCL016C	1.62427			YIL052C	-1.17016
	YER024W	1.62366			YNL300W	-1.16973
	YHL036W	1.62319			YNL069C	-1.16813
	YNL065W	1.62107			YOR101W	-1.16795
	YGR225W	1.61125			YGL029W	-1.16501
	YKR076W	1.61121			YPL252C	-1.16206
	YJR151C	1.60462			YMR246W	-1.16156
	YOR059C	1.60321			YAL038W	-1.16012
	YML002W	1.59868			YPL114W	-1.16001
	YDR001C	1.59726			YEL027W	-1.1582
	YLR173W	1.59615			YNL111C	-1.15755
	YFL053W	1.58983			YGL189C	-1.15732
	YPL250C	1.58628			YLR208W	-1.15689
	YDR277C	1.58515			YDL191W	-1.15555
	YLR453C	1.57832			YLR372W	-1.15476
	YLL063C	1.57689			YGL031C	-1.15267
	YIL155C	1.5757			YHR128W	-1.15242
	YCR023C	1.57498			YOR007C	-1.15199
	YCR075C	1.57307			YER011W	-1.1515
	YIL073C	1.57233			YLR075W	-1.14989
	YIL169C	1.57088			YBR189W	-1.14744
	YAL054C	1.57042			YDL160C-A	-1.14507
	YJR073C	1.5675			YBL072C	-1.14426
	YCL024W	1.56291			YNL301C	-1.14348
	YHL037C	1.56043			YMR142C	-1.14124
	YLR266C	1.55868			YFL045C	-1.13747
	YLR376C	1.55295			YML022W	-1.13733
	YHL047C	1.55159			YGL135W	-1.13726
	YDL238C	1.54662			YDL095W	-1.13251
	YDL079C	1.54581			YCR095W-A	-1.13223
	YEL057C	1.54472			YPL143W	-1.13172
	YGL096W	1.54465			YKR092C	-1.12748
	YOR010C	1.54451			YNL154C	-1.12646
	YBL074C	1.54138			YFL037W	-1.1247
	YDR074W	1.54111			YJL026W	-1.12462
	YKL051W	1.54081			YFL004W	-1.12346
	YMR052W	1.54012			YPR133W-A	-1.12331
	YOR366W	1.53942			YLR017W	-1.12021
	YNR064C	1.53845			YMR121C	-1.11851
	YMR056C	1.53494			YER074W	-1.11764
	YMR101C	1.52869			YHR179W	-1.11617
	YCR066W	1.52603			YNL016W	-1.11586
	YKL222C	1.52343			YDR428C	-1.11506
	YNR056C	1.52197			YOR133W	-1.1125
	YNL125C	1.51702			YOR063W	-1.11218
	YPL092W	1.51652			YMR242C	-1.11218
	YDL231C	1.51547			YBR025C	-1.1115
	YLL059C	1.51492			YIL133C	-1.11141
	YHR180W	1.51315			YOR335C	-1.11117
	YJR130C	1.51261			YOL086C	-1.11095
	YKL150W	1.51223			YDR385W	-1.11081
	YIL120W	1.5117			YGL076C	-1.10944
	YGR019W	1.51123			YGR249W	-1.10794
	YCR024C	1.50865			YHR047C	-1.10787
	YCR063W	1.50655			YPR163C	-1.10779
	YKL096W	1.5042			YHR010W	-1.10726
	YBR020W	1.50306			YPR063C	-1.10648
	YGL248W	1.49727			YMR209C	-1.1052
	YCR032W	1.4896			YMR243C	-1.10361
	YOR005C	1.48609			YLR432W	-1.10254
	YCR010C	1.48606			YLR192C	-1.09988
	YCL012C	1.4759			YJR047C	-1.09945
	YGR008C	1.47562			YLR293C	-1.09844
	YEL049W	1.47397			YGR181W	-1.09475
	YIL028W	1.47228			YDL229W	-1.09035
	YJR153W	1.47123			YGR106C	-1.0892
	YDR402C	1.47029			YMR269W	-1.08832
	YGR194C	1.46946			YBL027W	-1.08728
	YKL133C	1.46702			YER023W	-1.08633
	YDL124W	1.46565			YGR148C	-1.08589
	YDL022W	1.46487			YML026C	-1.08587
	YCR003W	1.4624			YLR344W	-1.08503
	YNR014W	1.45858			YNL112W	-1.08484
	YNL046W	1.4493			YLR435W	-1.08406
	YOR177C	1.44804			YPR043W	-1.07929
	YOR318C	1.44761			YJR048W	-1.07917
	YNL092W	1.44198			YML018C	-1.07699
	YJR036C	1.43384			YDR012W	-1.07362
	YCR081W	1.43329			YJL218W	-1.0735
	YJR127C	1.4301			YDR241W	-1.07287
	YGR149W	1.42845			YMR205C	-1.07206
	YAR023C	1.42703			YNL209W	-1.07078
	YBR214W	1.42695			YJL130C	-1.07039
	YPR085C	1.42222			YPR132W	-1.06995
	YDR366C	1.42162			YER102W	-1.06748
	YNL331C	1.41966			YJR123W	-1.06734
	YCL025C	1.41922			YER138W-A	-1.0673
	YCR054C	1.41755			YLR200W	-1.0667
	YKL109W	1.41494			YPR102C	-1.06575
	YGR153W	1.41151			YPL220W	-1.06431
	YIR014W	1.41082			YLR333C	-1.06069
	YEL063C	1.40252			YAL023C	-1.06008
	YCR019W	1.40177			YDR064W	-1.06005
	YBR184W	1.40026			YDR300C	-1.05921
	YIR007W	1.39653			YMR186W	-1.05842
	YGR045C	1.39566			YOR276W	-1.05836
	YDR386W	1.39463			YOR096W	-1.05675
	YMR055C	1.39084			YBR031W	-1.05398
	YHR075C	1.38739			YLR167W	-1.05194
	YKL151C	1.38722			YBL098W	-1.04724
	YDR231C	1.38395			YHR145C	-1.04651
	YOR363C	1.3804			YPL145C	-1.0447
	YBR006W	1.37979			YJL122W	-1.04427
	YOL048C	1.37734			YGR192C	-1.04277
	YDR059C	1.37549			YPL061W	-1.04204
	YDR421W	1.37411			YOL014W	-1.04035
	YDR350C	1.3741			YNL010W	-1.03988
	YHR104W	1.37373			YOL080C	-1.03723
	YCL061C	1.37212			YNL217W	-1.03504
	YMR023C	1.37153			YPL079W	-1.03348
	YCL035C	1.37053			YDR346C	-1.03338
	YHL042W	1.37039			YPL146C	-1.03312
	YMR040W	1.36589			YBR155W	-1.03101
	YER077C	1.36551			YGR118W	-1.03087
	YGR016W	1.36428			YGL103W	-1.03051
	YBR076W	1.36026			YML063W	-1.03001
	YCR026C	1.3598			YMR260C	-1.0296
	YDR379C-A	1.35384			YDL136W	-1.02847
	YJR152W	1.35331			YPR182W	-1.02625
	YLR346C	1.35149			YNL248C	-1.02428
	YHR210C	1.34968			YDR139C	-1.02381
	YPR121W	1.34878			YDL084W	-1.02356
	YLR446W	1.34654			YIL043C	-1.02251
	YIR016W	1.34579			YLR441C	-1.02238
	YLR284C	1.34448			YMR153C-A	-1.02229
	YDR332W	1.34012			YDL039C	-1.0222
	YCR042C	1.34002			YHR068W	-1.02211
	YJR021C	1.33781			YEL037C	-1.02058
	YGR053C	1.33706			YKL192C	-1.02034
	YCL033C	1.33673			YBL067C	-1.02026
	YKL091C	1.33576			YKR081C	-1.01995
	YMR030W	1.33373			YIL016W	-1.01985
	YDR085C	1.33231			YBR093C	-1.01633
	YOL082W	1.33211			YPL226W	-1.01631
	YPL111W	1.33139			YGR159C	-1.01509
	YCL032W	1.33036			YMR116C	-1.01491
	YLR317W	1.32969			YER009W	-1.011
	YDR124W	1.32887			YIL020C	-1.00895
	YIL077C	1.32862			YGL202W	-1.00733
	YBR132C	1.32252			YLR452C	-1.00676
	YLR345W	1.3223			YPL160W	-1.00587
	YJR096W	1.32161			YBR015C	-1.00472
	YOR350C	1.32156			YOR182C	-1.00315
	YGR110W	1.3161			YPR172W	-1.00006
	YKL201C	1.31602			YGL016W	-1.00002
	YDR530C	1.31394			YOR116C	-0.995473
	YPR153W	1.31354			YBL004W	-0.99367
	YGL104C	1.31171			YER148W	-0.992104
	YDL222C	1.30954			YML028W	-0.990767
	YDL234C	1.30465			YDR180W	-0.990369
	YPL119C	1.30451			YNR032C-A	-0.99027
	YFR022W	1.30117			YKR094C	-0.989585
	YER015W	1.29951			YJL191W	-0.987292
	YBR065C	1.29424			YKL128C	-0.98728
	YML107C	1.29319			YBL020W	-0.984332
	YLR246W	1.29098			YOR091W	-0.984276
	YMR025W	1.29074			YAL007C	-0.98375
	YOR386W	1.2881			YPR128C	-0.981864
	YNR001C	1.2843			YJR064W	-0.98176
	YOR162C	1.28049			YMR308C	-0.980346
	YOR303W	1.2798			YOR315W	-0.976973
	YMR063W	1.27422			YPL090C	-0.975022
	YJL023C	1.27362			YFR031C-A	-0.97468
	YMR096W	1.2736			YHR064C	-0.973543
	YLR393W	1.27316			YDL181W	-0.973274
	YKL093W	1.27141			YDL064W	-0.972675
	YBR223C	1.27108			YMR229C	-0.971439
	YNL294C	1.26605			YOR312C	-0.969716
	YJR039W	1.2654			YPR181C	-0.969323
	YOL015W	1.26447			YGR285C	-0.969229
	YLR233C	1.2627			YHR143W	-0.968666
	YJL144W	1.26074			YHR039C-A	-0.96827
	YBL019W	1.26045			YFL039C	-0.967651
	YML091C	1.26026			YKL054C	-0.965981
	YEL005C	1.26024			YBL002W	-0.965972
	YNR066C	1.2594			YOR247W	-0.965043
	YIL097W	1.25893			YDR232W	-0.964385
	YLR177W	1.25854			YPR116W	-0.96396
	YNL328C	1.25648			YPL217C	-0.963018
	YEL072W	1.24972			YDR025W	-0.96277
	YPL214C	1.2494			YNL135C	-0.962225
	YGL243W	1.24924			YGR027C	-0.962096
	YER079W	1.24814			YOR198C	-0.962005
	YCR011C	1.24712			YGR240C	-0.959616
	YCR079W	1.24645			YOL124C	-0.958921
	YGL158W	1.24599			YOL127W	-0.957885
	YKL162C	1.24444			YGL147C	-0.95735
	YHR134W	1.24437			YDL058W	-0.957161
	YNL187W	1.24325			YGL054C	-0.957143
	YPL167C	1.24134			YPL227C	-0.955572
	YLL026W	1.23816			YBR104W	-0.955272
	YGR222W	1.23775			YHR141C	-0.954057
	YLR168C	1.23622			YGL078C	-0.952788
	YPL089C	1.23308			YOR253W	-0.952299
	YBR050C	1.2281			YMR012W	-0.952247
	YJR135C	1.22341			YER036C	-0.951193
	YGL090W	1.22304			YLL014W	-0.951185
	YGL222C	1.22152			YNR051C	-0.950194
	YOL155C	1.21975			YOR355W	-0.949219
	YPL072W	1.21932			YMR079W	-0.948978
	YHL022C	1.21812			YML094W	-0.94755
	YOR227W	1.21801			YER048W-A	-0.944558
	YPL134C	1.21737			YHR203C	-0.944507
	YDR438W	1.21591			YBR283C	-0.940807
	YBR149W	1.21537			YLR301W	-0.939668
	YOL043C	1.21444			YBR181C	-0.937148
	YPL123C	1.21397			YNL162W	-0.936054
	YER041W	1.21361			YEL021W	-0.934467
	YCR095C	1.21256			YLR380W	-0.933524
	YDR318W	1.2112			YIL138C	-0.933489
	YBR063C	1.20855			YER112W	-0.932235
	YEL030W	1.20768			YJR145C	-0.932011
	YCR030C	1.20324			YPR170W-B	-0.931852
	YHR124W	1.19807			YGR091W	-0.931219
	YMR316W	1.1973			YHL033C	-0.930773
	YIL113W	1.19368			YDR352W	-0.929148
	YDR285W	1.19363			YPR073C	-0.928154
	YDR358W	1.19087			YLR056W	-0.927435
	YPL164C	1.19009			YDR412W	-0.926612
	YBL060W	1.18944			YLR328W	-0.926438
	YDR516C	1.18889			YJL078C	-0.926063
	YKR009C	1.18815			YLR083C	-0.925183
	YFL049W	1.18789			YNR016C	-0.924173
	YLL056C	1.18417			YIL018W	-0.922942
	YDL130W-A	1.18203			YHR005C-A	-0.921526
	YOL117W	1.18165			YER025W	-0.921485
	YEL060C	1.18139			YKL106W	-0.921223
	YLL055W	1.18131			YGL014W	-0.9206
	YNL270C	1.17863			YBR127C	-0.919992
	YNL011C	1.17844			YKL172W	-0.918384
	YER158C	1.17242			YLR395C	-0.918098
	YOR349W	1.17227			YJR060W	-0.917742
	YCL030C	1.16936			YDR414C	-0.915503
	YBR105C	1.16928			YOR311C	-0.914689
	YBR295W	1.16799			YNL142W	-0.913855
	YMR293C	1.16797			YLR175W	-0.91375
	YKL168C	1.1658			YDL127W	-0.912489
	YGL154C	1.16298			YGR061C	-0.912348
	YLR394W	1.15993			YOR224C	-0.910713
	YDR479C	1.15617			YJR044C	-0.910273
	YKL208W	1.15563			YMR143W	-0.910121
	YKL124W	1.15484			YER030W	-0.90942
	YLR381W	1.15311			YML108W	-0.906642
	YGL059W	1.15184			YJR105W	-0.904645
	YLR164W	1.14951			YHR025W	-0.904591
	YKL159C	1.14932			YGR094W	-0.903653
	YPR081C	1.14807			YKL096W-A	-0.902888
	YLR227C	1.14493			YMR088C	-0.902345
	YJL057C	1.14448			YPL198W	-0.901269
	YLR289W	1.14413			YPL032C	-0.900826
	YDR106W	1.14334			YBR042C	-0.900445
	YOR037W	1.14273			YJR069C	-0.899331
	YLR004C	1.14138			YHR019C	-0.898385
	YBR297W	1.14097			YGR204W	-0.896957
	YBR054W	1.13949			YDL201W	-0.895128
	YDL110C	1.13714			YOR051C	-0.895029
	YKL142W	1.13683			YJR009C	-0.894998
	YIL107C	1.13674			YGL225W	-0.893345
	YPL064C	1.13638			YLR059C	-0.891632
	YDL154W	1.13615			YER178W	-0.891064
	YER101C	1.13599			YFL022C	-0.890249
	YGR087C	1.13191			YJL136C	-0.889245
	YMR262W	1.12599			YDR033W	-0.887773
	YLL019C	1.12594			YNL153C	-0.887591
	YLR042C	1.12168			YBR286W	-0.88558
	YER173W	1.12054			YML085C	-0.884527
	YDR448W	1.11929			YNL080C	-0.884139
	YPL174C	1.11851			YDR062W	-0.883984
	YNL305C	1.1184			YPR041W	-0.883748
	YPL216W	1.11737			YGR085C	-0.881161
	YIL017C	1.11439			YIL148W	-0.880043
	YCL057C-A	1.1141			YDR120C	-0.880002
	YPL095C	1.11225			YDR410C	-0.879831
	YHR153C	1.11045			YJR118C	-0.878866
	YEL023C	1.10903			YHR133C	-0.878109
	YJL185C	1.10797			YJR124C	-0.876802
	YGR042W	1.10641			YDL205C	-0.875553
	YPL024W	1.10345			YER004W	-0.875208
	YIL162W	1.10285			YIL123W	-0.875138
	YNL063W	1.10276			YDR233C	-0.874965
	YKR049C	1.10242			YAL012W	-0.870742
	YGR075C	1.10182			YGR054W	-0.870557
	YKL164C	1.10033			YPL048W	-0.870489
	YMR053C	1.09885			YBR082C	-0.870208
	YCR002C	1.09634			YER042W	-0.87012
	YMR278W	1.0961			YDL153C	-0.867895
	YPL054W	1.0961			YNL216W	-0.865074
	YLR414C	1.09601			YER156C	-0.861079
	YKR104W	1.09276			YLL008W	-0.860404
	YDR383C	1.08742			YNL147W	-0.859315
	YDR133C	1.08707			YKL160W	-0.85684
	YHR030C	1.08494			YNL201C	-0.856392
	YFR046C	1.08405			YGL120C	-0.855122
	YCL055W	1.08352			YPL063W	-0.854945
	YOR364W	1.08222			YPL237W	-0.854276
	YIL117C	1.08022			YPL082C	-0.853208
	YIL023C	1.07974			YNR017W	-0.852351
	YNL134C	1.07915			YNR043W	-0.851494
	YLR283W	1.07724			YDR042C	-0.850235
	YOR028C	1.07671			YKL081W	-0.849489
	YDR131C	1.07535			YLR437C	-0.848983
	YJL163C	1.07339			YOL125W	-0.848903
	YIL071C	1.07295			YMR309C	-0.847784
	YHR018C	1.07287			YIL121W	-0.847024
	YHR157W	1.06898			YDR483W	-0.846851
	YLR097C	1.06895			YHL039W	-0.846349
	YDL024C	1.06852			YNL121C	-0.84551
	YIL050W	1.06699			YBR243C	-0.842638
	YPL175W	1.06674			YBR296C	-0.841088
	YDR459C	1.06569			YJL014W	-0.841008
	YBR056W	1.06512			YLR025W	-0.840285
	YAL037W	1.06464			YKL009W	-0.840195
	YOL083W	1.06368			YPR052C	-0.840129
	YGR131W	1.06317			YOL097C	-0.840118
	YGR239C	1.06304			YHR041C	-0.840027
	YCL034W	1.06149			YEL055C	-0.839562
	YLR460C	1.06086			YGR180C	-0.839221
	YDL025C	1.0576			YOL092W	-0.837297
	YCL051W	1.05712			YML036W	-0.834846
	YOL112W	1.05582			YER117W	-0.83343
	YGR174C	1.05434			YJR085C	-0.832954
	YJL079C	1.05375			YOL121C	-0.831083
	YOR205C	1.0536			YJL117W	-0.830682
	YLR037C	1.05186			YHR007C	-0.827506
	YKR046C	1.04854			YKL152C	-0.827469
	YMR041C	1.0476			YKR025W	-0.826816
	YCR102C	1.04665			YKL073W	-0.826726
	YIR005W	1.04638			YMR286W	-0.8263
	YLL025W	1.04487			YLR050C	-0.825929
	YLR304C	1.04325			YEL031W	-0.82406
	YLL041C	1.04142			YHR032W-A	-0.823966
	YMR284W	1.04041			YJR143C	-0.823642
	YJL155C	1.03975			YLR074C	-0.823506
	YER076C	1.03687			YNL090W	-0.823375
	YLR194C	1.03594			YGL050W	-0.822908
	YIL055C	1.03587			YKL117W	-0.821406
	YCR086W	1.03432			YGL122C	-0.821247
	YIL045W	1.03302			YBR162C	-0.820359
	YOR305W	1.02832			YML073C	-0.819955
	YBL088C	1.02795			YLR185W	-0.819136
	YBR237W	1.02457			YOR145C	-0.818239
	YKR004C	1.02078			YMR296C	-0.817826
	YHR176W	1.01952			YMR001C-A	-0.817387
	YOL009C	1.0177			YIL064W	-0.81677
	YPL022W	1.01751			YGR036C	-0.816303
	YKR102W	1.01742			YGL206C	-0.815096
	YOL154W	1.01731			YMR183C	-0.814553
	YMR306W	1.0151			YML080W	-0.814321
	YBR053C	1.01471			YLR449W	-0.813779
	YCR073W-A	1.0135			YPR143W	-0.813562
	YOL100W	1.01288			YER146W	-0.811712
	YBR085C-A	1.01037			YML048W	-0.811474
	YDR160W	1.01031			YEL051W	-0.811242
	YLR408C	1.00907			YDL219W	-0.810854
	YOR292C	1.00781			YDL123W	-0.810759
	YCR017C	1.00729			YOR336W	-0.810714
	YLR315W	1.00613			YDL051W	-0.810267
	YLR431C	1.0038			YOL077W-A	-0.809835
	YOR077W	1.00114			YPL128C	-0.809797
	YER130C	1.00046			YPR114W	-0.807936
	YDL107W	1.00017			YIL074C	-0.807928
	YMR280C	0.997685			YJR077C	-0.807769
	YMR135C	0.997419			YBR079C	-0.806925
	YLR288C	0.997392			YOR341W	-0.806107
	YPL233W	0.997042			YHR172W	-0.805863
	YOR185C	0.995256			YGR177C	-0.804121
	YCR083W	0.993055			YKL165C	-0.803342
	YCL052C	0.986582			YPR183W	-0.803322
	YDR379W	0.986122			YGR116W	-0.802125
	YHR150W	0.984671			YGL245W	-0.801183
	YBR005W	0.983268			YKL082C	-0.801067
	YDR078C	0.983146			YNL245C	-0.800343
	YOR036W	0.98297			YJL012C	-0.800165
	YCR071C	0.979091			YGR103W	-0.798769
	YDR265W	0.979042			YGR041W	-0.79783
	YMR137C	0.976157			YDL063C	-0.797418
	YGR133W	0.973834			YKL014C	-0.797276
	YMR315W	0.973324			YPL239W	-0.797226
	YLR225C	0.971272			YNL031C	-0.796454
	YCR082W	0.970789			YBL003C	-0.795417
	YDR523C	0.969992			YOR045W	-0.795225
	YLR125W	0.96783			YDR245W	-0.795019
	YJL013C	0.967628			YHL034C	-0.794454
	YDR147W	0.965097			YKR042W	-0.793635
	YNL329C	0.964981			YKL181W	-0.793432
	YBL078C	0.964726			YJL145W	-0.793206
	YER175C	0.963603			YGL067W	-0.791623
	YML099C	0.963485			YGL148W	-0.791354
	YCL005W	0.962408			YMR292W	-0.790861
	YPR196W	0.961742			YBR252W	-0.790484
	YMR299C	0.961554			YHL011C	-0.790368
	YGR108W	0.959201			YLR044C	-0.789243
	YDR119W-A	0.958664			YLR409C	-0.788641
	YNR065C	0.950477			YOR056C	-0.788477
	YGL134W	0.949909			YPL211W	-0.788098
	YER026C	0.948723			YNL132W	-0.78728
	YOR389W	0.948614			YLR292C	-0.787231
	YPL264C	0.947174			YAL030W	-0.785722
	YNL200C	0.947069			YJR007W	-0.78238
	YOR192C	0.946674			YGR158C	-0.781647
	YGL128C	0.946127			YOR209C	-0.78152
	YBR203W	0.944273			YNL061W	-0.779451
	YCR065W	0.943493			YPR062W	-0.778854
	YLL003W	0.943101			YDR060W	-0.77882
	YNL036W	0.941904			YLR134W	-0.778389
	YGR109C	0.941306			YNR046W	-0.777411
	YGR111W	0.939581			YDL012C	-0.776433
	YLR300W	0.939205			YJL001W	-0.776099
	YJL048C	0.937074			YDR050C	-0.774033
	YCL047C	0.934037			YER006W	-0.773365
	YBR216C	0.928162			YMR123W	-0.772917
	YCR046C	0.92772			YFL041W	-0.772105
	YJL005W	0.926502			YGR245C	-0.771419
	YLR245C	0.923035			YKL068W	-0.770422
	YBR047W	0.92302			YKR043C	-0.770229
	YPL052W	0.92245			YDL067C	-0.770182
	YGR223C	0.921979			YBR118W	-0.76975
	YKL017C	0.919987			YIL039W	-0.768841
	YHL048W	0.919539			YGL220W	-0.767342
	YMR199W	0.917986			YBR221C	-0.766842
	YOR035C	0.917862			YOL061W	-0.765865
	YGR238C	0.914069			YJL002C	-0.764011
	YBR139W	0.913062			YOR327C	-0.763669
	YER098W	0.91093			YNR018W	-0.763647
	YKL121W	0.908554			YBR171W	-0.763276
	YHR006W	0.908093			YMR131C	-0.762623
	YOL119C	0.907877			YMR290C	-0.762056
	YKR078W	0.906918			YKL032C	-0.761906
	YOR219C	0.906319			YJL062W-A	-0.761822
	YMR294W	0.904749			YDL195W	-0.760347
	YHR048W	0.904155			YPR080W	-0.760022
	YML117W	0.904091			YBL039C	-0.759844
	YPL149W	0.902702			YJL124C	-0.759825
	YDR381C-A	0.902438			YNL313C	-0.758552
	YDL176W	0.902293			YML125C	-0.758311
	YMR204C	0.901798			YKL006W	-0.757504
	YOR383C	0.90084			YKL024C	-0.757389
	YOR026W	0.900671			YBL071W-A	-0.757172
	YOR161C	0.900055			YLR229C	-0.756333
	YAR035W	0.896469			YNL307C	-0.755815
	YOR127W	0.896075			YNL110C	-0.755675
	YBR138C	0.895447			YPL030W	-0.754299
	YML068W	0.895159			YGR078C	-0.753137
	YHR080C	0.894908			YLR073C	-0.75298
	YJL159W	0.894152			YLR303W	-0.752516
	YPL109C	0.893665			YPL012W	-0.751922
	YHR142W	0.893549			YFL005W	-0.751603
	YJL065C	0.890525			YNL084C	-0.75159
	YER109C	0.890408			YDR310C	-0.749453
	YPL003W	0.889674			YHR088W	-0.749098
	YOR220W	0.889667			YDR510W	-0.74901
	YOR066W	0.887807			YNR021W	-0.746402
	YKL098W	0.886739			YER003C	-0.744755
	YCR067C	0.885676			YGL008C	-0.744015
	YAL053W	0.882527			YLL018C	-0.743822
	YOL055C	0.881711			YJR139C	-0.743483
	YKR022C	0.881644			YGR280C	-0.742607
	YNL314W	0.881127			YLR009W	-0.741502
	YBR228W	0.881088			YIL038C	-0.74121
	YER066W	0.880148			YAR002C-A	-0.741115
	YMR124W	0.879516			YDL031W	-0.740686
	YER035W	0.878588			YLR002C	-0.739402
	YCR077C	0.878082			YNL078W	-0.739169
	YBR217W	0.878074			YDR119W	-0.738806
	YJL049W	0.876617			YMR256C	-0.738413
	YGR189C	0.875985			YDR303C	-0.737954
	YOR136W	0.873734			YIL011W	-0.737556
	YCL014W	0.871618			YLR347C	-0.737189
	YPL247C	0.869882			YDR002W	-0.737163
	YBR241C	0.86903			YPL254W	-0.73439
	YDR316W	0.868894			YBR154C	-0.733364
	YMR064W	0.868747			YBR142W	-0.733076
	YPL248C	0.868346			YPL096C-A	-0.733012
	YIL009C-A	0.868014			YLL061W	-0.732955
	YDL216C	0.867444			YML012W	-0.731856
	YJR107W	0.867443			YNL149C	-0.730283
	YPL151C	0.866022			YLR154C	-0.729688
	YDR336W	0.863566			YBR049C	-0.729071
	YOL016C	0.862713			YNL308C	-0.728423
	YMR167W	0.861613			YIL126W	-0.727975
	YPL026C	0.859557			YMR177W	-0.727179
	YOL011W	0.857529			YDR471W	-0.726983
	YGR287C	0.856187			YMR061W	-0.726975
	YPR046W	0.855698			YML024W	-0.725597
	YDR453C	0.854978			YER136W	-0.724732
	YGL247W	0.854926			YBR247C	-0.724455
	YKR080W	0.852655			YGL039W	-0.724216
	YCR020C-A	0.849431			YKL216W	-0.723957
	YPR134W	0.849026			YDL002C	-0.7236
	YFR014C	0.848463			YJL111W	-0.723195
	YKR077W	0.847897			YDL208W	-0.722814
	YCL008C	0.847433			YHR163W	-0.722671
	YBR126C	0.847079			YER027C	-0.722078
	YHR194W	0.846972			YMR049C	-0.721954
	YPR201W	0.846456			YDR212W	-0.721575
	YDR130C	0.846242			YBR078W	-0.720926
	YJL103C	0.846242			YKL210W	-0.720465
	YBL029C-A	0.845856			YGR187C	-0.718634
	YGL240W	0.845807			YMR318C	-0.717309
	YOR018W	0.843419			YJR010W	-0.716944
	YMR156C	0.843283			YDR321W	-0.716726
	YOL032W	0.842439			YGL171W	-0.71666
	YLR270W	0.84167			YLR188W	-0.716654
	YDR022C	0.840772			YDR083W	-0.71572
	YCR004C	0.840233			YGR082W	-0.715517
	YLL051C	0.839914			YGL040C	-0.713914
	YAL017W	0.837259			YPL234C	-0.712701
	YER033C	0.837068			YMR038C	-0.712249
	YKR027W	0.836227			YAR003W	-0.70987
	YNL037C	0.836179			YHL001W	-0.708982
	YDR223W	0.835999			YOR359W	-0.708712
	YOL138C	0.835572			YLR221C	-0.708438
	YJL213W	0.835407			YHR100C	-0.708011
	YNL143C	0.835129			YLL024C	-0.707095
	YDR256C	0.834961			YIL030C	-0.705938
	YDL049C	0.834516			YPL086C	-0.704152
	YOL071W	0.834473			YDL042C	-0.703764
	YDR125C	0.83357			YDR334W	-0.703543
	YBR256C	0.833459			YOL123W	-0.703118
	YCR009C	0.833445			YER161C	-0.702936
	YDR314C	0.83303			YOL139C	-0.702212
	YGR288W	0.832888			YAL067C	-0.702002
	YGR278W	0.829631			YLR138W	-0.701226
	YKL062W	0.828956			YLR447C	-0.700853
	YJL107C	0.828086			YGL092W	-0.70039
	YJR136C	0.827517			YJL127C-B	-0.699546
	YLR457C	0.827264			YER091C	-0.698241
	YNL249C	0.826785			YDL150W	-0.697883
	YBR262C	0.824996			YPL169C	-0.696024
	YBR068C	0.823324			YIR006C	-0.695664
	YML005W	0.821905			YBL054W	-0.694774
	YGR015C	0.821822			YAL042W	-0.69393
	YGR092W	0.821756			YBR233W-A	-0.693787
	YJR106W	0.821398			YOR098C	-0.693558
	YGL131C	0.821075			YDR161W	-0.693022
	YML076C	0.819896			YOL025W	-0.692272
	YIL124W	0.819523			YHR169W	-0.692204
	YJL108C	0.818878			YPL117C	-0.691964
	YGR057C	0.818347			YOL012C	-0.691521
	YPL222W	0.818221			YGR208W	-0.691034
	YBL080C	0.81798			YOR106W	-0.690618
	YOR137C	0.81774			YLL034C	-0.690247
	YOR031W	0.817179			YPR137W	-0.68864
	YLR247C	0.816806			YBR271W	-0.688168
	YCR075W-A	0.816353			YPR187W	-0.687861
	YDR525W-A	0.815964			YDR378C	-0.686309
	YMR154C	0.815887			YIL142W	-0.68596
	YML120C	0.815248			YOR232W	-0.684815
	YOR080W	0.81519			YER002W	-0.684554
	YPL189C-A	0.814608			YJL050W	-0.684269
	YLR273C	0.813506			YJL173C	-0.683844
	YKL087C	0.813046			YLR003C	-0.682233
	YHL032C	0.812842			YER086W	-0.682108
	YDL057W	0.812437			YDR170C	-0.68177
	YNL012W	0.811851			YHR085W	-0.680857
	YEL016C	0.810756			YAR002W	-0.680817
	YHR067W	0.809398			YDR188W	-0.680063
	YBL113C	0.809305			YPL043W	-0.679834
	YKR075C	0.808693			YHR136C	-0.677826
	YDR005C	0.807195			YPL028W	-0.677752
	YBR037C	0.807084			YPL016W	-0.67765
	YDR191W	0.806881			YDR341C	-0.677334
	YHR198C	0.805812			YOR323C	-0.677154
	YLR307W	0.804802			YHR188C	-0.676269
	YKR101W	0.804622			YJL129C	-0.675483
	YAL062W	0.802451			YDR091C	-0.674539
	YPL213W	0.801921			YNL023C	-0.672129
	YDR435C	0.798336			YNL131W	-0.671602
	YMR316C-B	0.79778			YGL022W	-0.67139
	YJL082W	0.795649			YOR270C	-0.670775
	YOR003W	0.793217			YLR172C	-0.670356
	YPL144W	0.792005			YJL010C	-0.669733
	YCR088W	0.791142			YOR346W	-0.668535
	YCR090C	0.790972			YNL035C	-0.66825
	YOR357C	0.790962			YBR157C	-0.668221
	YJL066C	0.790083			YNR030W	-0.667701
	YDR319C	0.78942			YDR292C	-0.667675
	YOR155C	0.789329			YDL140C	-0.667314
	YOL158C	0.789224			YPR110C	-0.667186
	YNL223W	0.789109			YJL133W	-0.6668
	YDL072C	0.788219			YER118C	-0.666234
	YGL185C	0.788003			YOR271C	-0.666001
	YDL210W	0.786376			YNL247W	-0.665735
	YLR098C	0.785599			YPL093W	-0.664774
	YOR368W	0.784801			YML058W	-0.664369
	YAL002W	0.784642			YKR056W	-0.663758
	YDR069C	0.784425			YOR176W	-0.663508
	YBR098W	0.784033			YPL218W	-0.663464
	YER162C	0.782802			YNL251C	-0.663198
	YCR028C	0.781814			YGR211W	-0.662456
	YCR094W	0.781186			YMR310C	-0.661702
	YDR109C	0.780713			YLR068W	-0.660874
	YJL093C	0.779856			YBL076C	-0.659775
	YPL219W	0.779181			YPR118W	-0.659737
	YDR371W	0.778913			YOL059W	-0.658924
	YPR082C	0.7781			YIL044C	-0.658807
	YBL091C-A	0.777746			YJL052W	-0.658695
	YGL006W	0.775758			YNL255C	-0.657576
	YJL162C	0.77563			YOR239W	-0.657052
	YNL115C	0.775051			YER080W	-0.656773
	YLR035C	0.771604			YKL205W	-0.65658
	YOL122C	0.770966			YOL076W	-0.656421
	YKL090W	0.770764			YOR143C	-0.655289
	YIL087C	0.77061			YAL035W	-0.654648
	YMR068W	0.770459			YOR301W	-0.654074
	YHL014C	0.769993			YDR429C	-0.653014
	YDL113C	0.769157			YER056C-A	-0.652801
	YLR080W	0.76652			YFL023W	-0.651509
	YMR253C	0.766325			YDL092W	-0.651319
	YOR030W	0.765006			YIL019W	-0.65129
	YPR157W	0.764523			YFR049W	-0.650757
	YDR030C	0.76452			YOR122C	-0.650186
	YGL045W	0.764506			YML077W	-0.649802
	YDR185C	0.764418			YJR076C	-0.649284
	YGR258C	0.763703			YHR052W	-0.648559
	YDL020C	0.763578			YOR344C	-0.648158
	YPL236C	0.760514			YOL022C	-0.648136
	YGL141W	0.759953			YDL157C	-0.647735
	YDR309C	0.758537			YBR159W	-0.646303
	YKL045W	0.758374			YJL125C	-0.64422
	YHL046C	0.75832			YGL106W	-0.642869
	YCL057W	0.758276			YML031W	-0.642652
	YCR092C	0.757423			YHR036W	-0.642514
	YDL233W	0.755414			YNL278W	-0.640742
	YOL107W	0.755237			YEL040W	-0.640369
	YOL023W	0.754836			YNR067C	-0.639953
	YHR105W	0.754538			YDR519W	-0.639729
	YPL150W	0.754362			YOR016C	-0.639412
	YDR513W	0.754174			YML115C	-0.639304
	YIL084C	0.754143			YBR034C	-0.639042
	YDR254W	0.753905			YNL151C	-0.638626
	YDL183C	0.75259			YGL234W	-0.637209
	YLR360W	0.752349			YHR013C	-0.63622
	YAL015C	0.750783			YNR038W	-0.636114
	YDR031W	0.750757			YEL002C	-0.635681
	YPL133C	0.749445			YOR175C	-0.633831
	YER180C	0.74937			YHR070W	-0.633345
	YAL034C	0.749346			YBR267W	-0.63334
	YDR179C	0.748046			YOR197W	-0.632277
	YBR258C	0.746618			YGR090W	-0.631982
	YDR370C	0.746276			YGR254W	-0.630234
	YKR103W	0.746198			YPL050C	-0.6296
	YGL010W	0.745179			YPL199C	-0.629519
	YJR108W	0.745059			YML093W	-0.629466
	YMR066W	0.743636			YLR099W-A	-0.628465
	YKR011C	0.742678			YIL078W	-0.627649
	YOR148C	0.742313			YJL008C	-0.62725
	YKR069W	0.741758			YOR272W	-0.627146
	YHR171W	0.741108			YER100W	-0.626461
	YMR251W-A	0.740078			YGR279C	-0.624334
	YDR013W	0.739863			YAL024C	-0.623952
	YBR182C	0.739245			YML017W	-0.623847
	YIL092W	0.737071			YJR116W	-0.622893
	YER037W	0.736523			YBR089C-A	-0.622742
	YBR024W	0.736152			YNL072W	-0.62213
	YLR201C	0.734796			YIL022W	-0.621871
	YJR109C	0.734501			YMR277W	-0.62107
	YBR001C	0.733891			YLR244C	-0.620135
	YGL212W	0.733349			YJL033W	-0.61986
	YJR100C	0.73234			YDL055C	-0.619404
	YLR254C	0.731324			YDL235C	-0.619263
	YIR023W	0.731283			YNL288W	-0.618867
	YCL011C	0.730834			YOL028C	-0.618369
	YGL081W	0.730622			YGR017W	-0.61771
	YDL194W	0.730361			YDL006W	-0.615928
	YKL219W	0.72917			YPR010C	-0.615625
	YBL106C	0.729152			YER007C-A	-0.61412
	YNL009W	0.728184			YDR361C	-0.613738
	YER188W	0.7277			YDR093W	-0.613146
	YPL272C	0.727331			YPL207W	-0.611829
	YEL025C	0.726437			YJL143W	-0.610942
	YGR235C	0.726173			YBR135W	-0.610926
	YOR052C	0.72446			YML081C-A	-0.610657
	YDL017W	0.72132			YLR065C	-0.609503
	YJL058C	0.721012			YPR035W	-0.609291
	YPR061C	0.720862			YDR172W	-0.608769
	YOR317W	0.719469			YER057C	-0.607976
	YIR025W	0.719041			YER089C	-0.606888
	YPR200C	0.718048			YPR037C	-0.606567
	YOL113W	0.717474			YNL197C	-0.606492
	YPL068C	0.715704			YIR037W	-0.605846
	YHR097C	0.714339			YJL109C	-0.605796
	YJL070C	0.714276			YBL011W	-0.605696
	YGL223C	0.713711			YGL137W	-0.605409
	YNR034W	0.713514			YGL071W	-0.605394
	YJR110W	0.712978			YOR321W	-0.604817
	YGR161W-C	0.712253			YDL165W	-0.604599
	YIL161W	0.711459			YHR148W	-0.604254
	YMR194C-B	0.710161			YPL245W	-0.603588
	YJR035W	0.710095			YGL027C	-0.603428
	YLR054C	0.707594			YBR143C	-0.60337
	YJL126W	0.706764			YJL183W	-0.603286
	YMR174C	0.706151			YER012W	-0.602808
	YPL004C	0.703756			YDL112W	-0.60249
	YMR110C	0.703357			YDL046W	-0.602392
	YMR073C	0.703285			YLL031C	-0.602133
	YPR015C	0.702764			YHR121W	-0.602047
	YDR293C	0.702735			YAL036C	-0.601027
	YOL053W	0.702242			YBL093C	-0.599228
	YDR499W	0.702225			YBR125C	-0.599202
	YDR387C	0.702098			YNR028W	-0.598892
	YER088C	0.701951			YPR165W	-0.597856
	YFR005C	0.701949			YOL109W	-0.597683
	YOR223W	0.701378			YMR202W	-0.597552
	YBR280C	0.700889			YNL052W	-0.597132
	YHR016C	0.699769			YOR067C	-0.596822
	YKR021W	0.69971			YJR002W	-0.596736
	YDR490C	0.698243			YGR128C	-0.596338
	YAR027W	0.697506			YBR146W	-0.595762
	YIL152W	0.696959			YHR197W	-0.595536
	YHR204W	0.696653			YNL168C	-0.595345
	YDR011W	0.695697			YMR010W	-0.5949
	YNL094W	0.695381			YOR313C	-0.594586
	YDL214C	0.694663			YAL021C	-0.594234
	YER053C-A	0.69204			YLR129W	-0.593425
	YMR097C	0.691164			YJL034W	-0.593288
	YGR006W	0.690539			YEL068C	-0.592144
	YHR156C	0.690112			YNL002C	-0.591539
	YDR236C	0.688898			YML072C	-0.591049
	YMR019W	0.688621			YOR168W	-0.590847
	YGR127W	0.688472			YGL077C	-0.590653
	YIL049W	0.688171			YHR206W	-0.589478
	YBR076C-A	0.684777			YPL094C	-0.589173
	YOR023C	0.683826			YDR517W	-0.588901
	YGL117W	0.683744			YBR249C	-0.588899
	YLR166C	0.681895			YGL186C	-0.588337
	YBR259W	0.681826			YGR283C	-0.587885
	YDR306C	0.68161			YOR254C	-0.587825
	YBR291C	0.681383			YER043C	-0.58733
	YHR090C	0.68123			YOR361C	-0.586938
	YML041C	0.681149			YJR072C	-0.58667
	YHR129C	0.679958			YBL036C	-0.586388
	YDR532C	0.677564			YEL038W	-0.586221
	YOL058W	0.676874			YHR099W	-0.586008
	YPL008W	0.676733			YDL074C	-0.585102
	YNL325C	0.676498			YNL085W	-0.583375
	YOR064C	0.676238			YJL069C	-0.583167
	YMR155W	0.675327			YMR265C	-0.583062
	YOL086W-A	0.674868			YKL196C	-0.582841
	YDR004W	0.674482			YDL212W	-0.582839
	YOR347C	0.67387			YOR046C	-0.582771
	YJR161C	0.67279			YKL112W	-0.582662
	YFL042C	0.672401			YMR214W	-0.582419
	YOR377W	0.672384			YHR108W	-0.582308
	YLL006W	0.672119			YNL108C	-0.58221
	YIL116W	0.671611			YBR121C	-0.581597
	YPR066W	0.67048			YFR001W	-0.581293
	YLR355C	0.66891			YMR014W	-0.581003
	YIL108W	0.668102			YDR518W	-0.580743
	YDR014W	0.667176			YPL212C	-0.579219
	YPL221W	0.667119			YMR044W	-0.578723
	YML087C	0.665919			YIL127C	-0.578213
	YPL154C	0.664423			YDL004W	-0.577614
	YKL218C	0.663492			YJL171C	-0.576854
	YER062C	0.662918			YNL238W	-0.575916
	YER179W	0.662695			YNL256W	-0.575858
	YPL147W	0.662586			YDL192W	-0.575821
	YOR152C	0.662455			YOL115W	-0.57506
	YHL019C	0.662056			YJR090C	-0.574635
	YNL195C	0.661367			YMR276W	-0.574237
	YPR155C	0.661309			YMR122W-A	-0.573259
	YKL189W	0.660696			YKL212W	-0.573244
	YLR312W-A	0.660063			YDL146W	-0.571419
	YLR189C	0.658891			YDR045C	-0.570999
	YOR226C	0.658825			YKL078W	-0.569366
	YOR104W	0.658209			YBR205W	-0.567654
	YNL053W	0.657373			YFL025C	-0.567458
	YDL248W	0.65711			YBL032W	-0.566786
	YHR161C	0.656425			YLL036C	-0.566663
	YLR306W	0.655402			YJR063W	-0.565887
	YLR049C	0.65484			YER125W	-0.565698
	YCL031C	0.654765			YMR203W	-0.565567
	YHR038W	0.652721			YOR340C	-0.564054
	YBR107C	0.652536			YPL184C	-0.563891
	YJR052W	0.652526			YDL098C	-0.562777
	YFR019W	0.652292			YER127W	-0.562222
	YDL200C	0.651791			YFL010C	-0.561777
	YKL065C	0.651344			YMR288W	-0.561678
	YGL124C	0.65121			YER019W	-0.560889
	YGR207C	0.650945			YNL064C	-0.560754
	YLR320W	0.649991			YPR033C	-0.560739
	YPL005W	0.647925			YKR084C	-0.560652
	YLR144C	0.647796			YOR039W	-0.560307
	YGL136C	0.646858			YGL232W	-0.559893
	YMR176W	0.646664			YOL077C	-0.559867
	YPL110C	0.644838			YFR030W	-0.558844
	YLR014C	0.643677			YLL062C	-0.558467
	YOR244W	0.641513			YDR464W	-0.557758
	YOR385W	0.640755			YDL145C	-0.556539
	YMR201C	0.640283			YGR276C	-0.555464
	YNL083W	0.639728			YHR170W	-0.554698
	YJL090C	0.638583			YKR003W	-0.554041
	YDL080C	0.638029			YDR020C	-0.553591
	YDL027C	0.637806			YOL103W	-0.552623
	YDR497C	0.637631			YNL246W	-0.551703
	YER163C	0.637303			YLL035W	-0.551565
	YBR255W	0.636996			YNR044W	-0.551218
	YCR069W	0.636395			YGL019W	-0.551187
	YPL206C	0.63577			YBL057C	-0.550691
	YDL119C	0.635668			YOL133W	-0.550436
	YIL006W	0.634956			YER107C	-0.550009
	YLR383W	0.633694			YJL123C	-0.549713
	YOR180C	0.631814			YML014W	-0.549087
	YIL106W	0.631588			YMR182C	-0.548779
	YOR275C	0.631434			YOL135C	-0.548687
	YPR111W	0.630184			YGR227W	-0.547834
	YLR205C	0.628533			YDL135C	-0.546196
	YBR269C	0.627846			YBR016W	-0.546104
	YMR111C	0.62497			YDR143C	-0.546088
	YOR375C	0.62492			YPL266W	-0.545306
	YJL059W	0.624685			YBR086C	-0.544888
	YBL059W	0.624337			YFR033C	-0.544459
	YAL060W	0.622514			YDR037W	-0.544077
	YPL152W	0.621949			YPL085W	-0.54387
	YDR268W	0.621265			YAL034W-A	-0.543725
	YCR027C	0.620078			YJR075W	-0.543109
	YIR032C	0.619357			YIR022W	-0.543077
	YML131W	0.619018			YDR194C	-0.543025
	YER064C	0.61851			YFR047C	-0.542962
	YPR036W-A	0.618364			YMR043W	-0.542908
	YJR112W-A	0.618241			YIL079C	-0.542145
	YBR114W	0.617497			YOR356W	-0.541754
	YDR444W	0.61719			YKR060W	-0.5417
	YLR343W	0.616312			YBL055C	-0.541462
	YBR230C	0.616159			YJL097W	-0.541109
	YDR364C	0.615958			YNL113W	-0.540363
	YBR225W	0.615899			YOR204W	-0.54006
	YNL159C	0.615854			YJR078W	-0.539591
	YJR006W	0.61558			YGR267C	-0.539231
	YFR045W	0.614893			YNL024C	-0.539164
	YIR038C	0.613901			YMR213W	-0.538918
	YDR263C	0.613348			YPL081W	-0.5384
	YCR035C	0.61224			YMR305C	-0.53831
	YJR122W	0.612034			YOR206W	-0.536525
	YDL139C	0.611932			YDR075W	-0.535529
	YNL261W	0.611716			YJR094W-A	-0.535337
	YLR120C	0.611583			YDR399W	-0.535001
	YPL060W	0.611549			YPR133C	-0.534699
	YLR412W	0.611317			YOL143C	-0.534218
	YBR294W	0.610772			YDR465C	-0.534034
	YNL157W	0.61074			YOR021C	-0.533955
	YLR423C	0.610719			YDR395W	-0.533561
	YPR093C	0.610065			YOL057W	-0.532148
	YNL100W	0.608755			YPL127C	-0.531859
	YPL067C	0.608561			YLR342W	-0.531319
	YDR541C	0.608505			YLR186W	-0.53119
	YDL048C	0.607857			YIL090W	-0.530919
	YPL071C	0.607718			YDR528W	-0.530808
	YMR100W	0.607629			YIL005W	-0.530668
	YGL226W	0.606787			YPR075C	-0.530536
	YDR511W	0.606485			YDR501W	-0.530357
	YFL044C	0.605831			YDR270W	-0.53019
	YJR033C	0.605012			YLR268W	-0.529819
	YBR278W	0.603898			YJL198W	-0.529144
	YLR121C	0.603728			YPR190C	-0.529117
	YGL250W	0.602784			YDL185W	-0.529111
	YGL079W	0.6024			YOR217W	-0.528702
	YJL100W	0.601304			YKL063C	-0.528626
	YPL087W	0.600765			YJR117W	-0.528604
	YDR137W	0.599317			YGR271C-A	-0.52834
	YNR035C	0.599159			YMR301C	-0.527957
	YJL046W	0.598542			YPL098C	-0.527728
	YLR046C	0.596814			YDL052C	-0.527609
	YGL021W	0.595731			YOR243C	-0.527567
	YMR197C	0.594696			YPL273W	-0.527174
	YMR136W	0.593367			YER044C	-0.527133
	YOR353C	0.592269			YNL096C	-0.526264
	YDR038C	0.591655			YFR039C	-0.525736
	YML129C	0.590739			YEL022W	-0.524797
	YGL073W	0.59045			YOL041C	-0.524418
	YER081W	0.590398			YLR190W	-0.524243
	YPL176C	0.589749			YER049W	-0.524102
	YEL028W	0.587204			YBR201W	-0.523854
	YLL027W	0.586671			YGL043W	-0.522927
	YJR062C	0.58647			YLR196W	-0.522632
	YDR196C	0.58598			YDR079C-A	-0.522508
	YNL056W	0.585679			YGL105W	-0.522161
	YKL085W	0.585388			YKR026C	-0.521641
	YGL056C	0.585266			YGL083W	-0.521394
	YLR007W	0.584887			YMR194W	-0.521071
	YJL084C	0.584522			YJL076W	-0.520523
	YJL151C	0.584043			YPL263C	-0.52024
	YDL115C	0.582012			YAL026C-A	-0.52015
	YOR354C	0.58155			YDL053C	-0.519846
	YPL014W	0.581328			YDR404C	-0.519565
	YPL267W	0.580972			YML113W	-0.518838
	YJR149W	0.580874			YKL058W	-0.518759
	YLR456W	0.579969			YNL141W	-0.517777
	YJR059W	0.579431			YDR324C	-0.51768
	YNR006W	0.57874			YNL241C	-0.517019
	YFR003C	0.578608			YLR197W	-0.516865
	YML023C	0.578605			YIL051C	-0.516793
	YBR108W	0.577894			YHR200W	-0.516367
	YLR313C	0.577868			YML065W	-0.515959
	YBR071W	0.576136			YDR424C	-0.514821
	YBR077C	0.575821			YNL191W	-0.514772
	YOR367W	0.575123			YBL068W	-0.514475
	YBR145W	0.574578			YLR020C	-0.514429
	YKL023W	0.572886			YAL059W	-0.51384
	YMR172W	0.570965			YAL064W-B	-0.513488
	YGL036W	0.570849			YLR034C	-0.512361
	YNL015W	0.569433			YDR422C	-0.511897
	YKL141W	0.568979			YOL094C	-0.511389
	YOR378W	0.568912			YDR447C	-0.511295
	YGR023W	0.568605			YDR487C	-0.509834
	YCL036W	0.566586			YER149C	-0.509811
	YPL274W	0.56621			YDL060W	-0.50975
	YLR454W	0.564901			YDR531W	-0.509743
	YKL148C	0.563496			YIL149C	-0.508562
	YCL002C	0.562667			YKR099W	-0.508505
	YHR106W	0.560998			YOR234C	-0.508236
	YDR126W	0.560618			YLR410W	-0.507984
	YLR016C	0.560516			YMR307W	-0.507752
	YNL146W	0.558815			YOR008C	-0.506844
	YDR315C	0.55771			YJL087C	-0.50682
	YAR033W	0.557571			YKR090W	-0.506629
	YGL175C	0.55704			YBL026W	-0.506318
	YER159C	0.556865			YDR110W	-0.506311
	YOR238W	0.556762			YPL137C	-0.506235
	YNL222W	0.556216			YDR054C	-0.504212
	YDR349C	0.556083			YNL007C	-0.503653
	YNL118C	0.55608			YML095C	-0.503309
	YOR215C	0.556044			YOR164C	-0.502782
	YPL007C	0.555548			YML008C	-0.50255
	YBR046C	0.554415			YLR018C	-0.502347
	YCR061W	0.552978			YOR265W	-0.502135
	YLR093C	0.551844			YBR192W	-0.501873
	YDR357C	0.551748			YDR502C	-0.501312
	YGR205W	0.551377			YLL038C	-0.50077
	YLR206W	0.551197			YNR054C	-0.500707
	YHR119W	0.550981			YDR367W	-0.500037
	YML057W	0.550264			YPR060C	-0.499288
	YOL017W	0.550195			YAL025C	-0.498954
	YCL029C	0.549748			YGL012W	-0.498946
	YMR164C	0.54884			YDL143W	-0.498872
	YOL148C	0.548323			YDR087C	-0.497995
	YPR199C	0.547426			YBR176W	-0.497783
	YBR251W	0.54674			YIL110W	-0.4971
	YNR040W	0.545746			YBL031W	-0.497077
	YKL033W	0.544935			YNL277W	-0.496289
	YIL007C	0.544569			YOR118W	-0.495746
	YPL241C	0.544246			YER048C	-0.4955
	YNL172W	0.540964			YLR291C	-0.494045
	YBR274W	0.54089			YLR066W	-0.493739
	YKL149C	0.539934			YHR196W	-0.493048
	YNL254C	0.539363			YOR156C	-0.491692
	YDL206W	0.538459			YNL075W	-0.491233
	YPL163C	0.537888			YGR264C	-0.490945
	YHL023C	0.537587			YHR144C	-0.490738
	YOR319W	0.536378			YLR008C	-0.490589
	YHR138C	0.536366			YDR365C	-0.490037
	YIL089W	0.535476			YER123W	-0.489782
	YFR007W	0.534536			YBL024W	-0.489745
	YAL027W	0.534482			YIL048W	-0.489372
	YDR041W	0.534389			YPR016C	-0.488996
	YJL204C	0.532509			YHR107C	-0.487734
	YDL077C	0.53219			YKL204W	-0.487624
	YJR131W	0.531402			YDR328C	-0.487209
	YDR104C	0.530372			YNL280C	-0.487097
	YJL210W	0.529692			YNL182C	-0.48688
	YLR417W	0.529339			YMR161W	-0.486573
	YDL087C	0.528475			YMR235C	-0.486296
	YGR021W	0.528383			YGL255W	-0.48625
	YNL230C	0.527975			YDR090C	-0.485778
	YDR214W	0.527848			YEL013W	-0.485142
	YCR053W	0.527269			YDR345C	-0.4844
	YMR020W	0.527002			YLR285W	-0.483439
	YHR159W	0.526734			YDR482C	-0.482971
	YGL095C	0.526727			YDR035W	-0.482557
	YBL038W	0.526508			YLR351C	-0.482414
	YFL024C	0.525337			YDR527W	-0.482026
	YLR204W	0.525143			YER028C	-0.48148
	YDR181C	0.524384			YBR151W	-0.48106
	YIL042C	0.524006			YOR140W	-0.480904
	YLR132C	0.522716			YFR021W	-0.480393
	YLR299W	0.522703			YLR055C	-0.480011
	YMR127C	0.522376
	YGL211W	0.52206
	YLR438W	0.521125
	YOR245C	0.521009
	YMR120C	0.5207
	YGR143W	0.520663
	YPL107W	0.520016
	YJR119C	0.519683
	YGR244C	0.518761
	YER007W	0.518621
	YIR034C	0.517825
	YMR022W	0.51778
	YJL044C	0.517662
	YBR004C	0.517395
	YKL003C	0.516836
	YGR080W	0.516002
	YIL130W	0.515943
	YDL149W	0.515458
	YOR022C	0.514728
	YLR382C	0.51463
	YNL006W	0.513681
	YER051W	0.512568
	YOR172W	0.512553
	YMR152W	0.51243
	YHR199C	0.512244
	YLR085C	0.512094
	YOL108C	0.511898
	YPR115W	0.51184
	YDR384C	0.511267
	YLR362W	0.511061
	YMR304W	0.510845
	YKR029C	0.51069
	YER116C	0.51053
	YGR170W	0.510341
	YPL177C	0.509831
	YBR188C	0.509538
	YOL003C	0.508751
	YBR204C	0.508741
	YNL020C	0.507752
	YJL099W	0.507292
	YDL044C	0.505594
	YGR179C	0.505263
	YNL025C	0.504298
	YLR094C	0.504197
	YGR270W	0.502419
	YMR219W	0.502414
	YDL173W	0.502007
	YPR127W	0.501653
	YDR046C	0.501584
	YKL048C	0.50131
	YOR125C	0.501159
	YIL125W	0.501036
	YDR202C	0.500287
	YER092W	0.50003
	YPL269W	0.500029
	YNL104C	0.499445
	YGL227W	0.499332
	YJL016W	0.498843
	YGR046W	0.498279
	YLR392C	0.498112
	YMR158W	0.497774
	YGR221C	0.497033
	YDL174C	0.496887
	YER045C	0.496764
	YOL146W	0.495628
	YMR031C	0.495268
	YIL098C	0.494625
	YGR068C	0.494245
	YLR451W	0.494237
	YAL047C	0.493592
	YHR091C	0.492914
	YNL257C	0.492125
	YDL230W	0.491107
	YPL155C	0.491044
	YBR156C	0.490845
	YFL033C	0.490657
	YCR044C	0.489264
	YGR048W	0.488799
	YMR008C	0.488274
	YJL147C	0.486292
	YDR436W	0.485925
	YML027W	0.48559
	YML119W	0.484265
	YDR247W	0.484229
	YDR227W	0.483537
	YMR069W	0.483158
	YAL055W	0.482795
	YMR267W	0.482645
	YGL110C	0.482637
	YDR291W	0.482578
	YMR224C	0.482472
	YCL063W	0.482143
	YHR147C	0.481581
	YMR302C	0.48155
	YLL023C	0.480019
