# Supplementary material for: Decapping factor Dcp2 controls mRNA abundance and translation to adjust metabolism and filamentation to nutrient availability
Source: eLife journal article supplement (doi:10.7554/elife.85545), 2023-06-02
Supplement: fig1-data2 [file Figure 1 – source data 2.xlsx]

## Sheet: Sheet1
	log2FC dcp2 vs WT
	Replicate 1	Replicate 2	Replicate 3	Avg	SD	SD/2
YOR178C	3.115	2.75	3	2.955	0.186615	0.0933073
YHL024W	2.235	1.925	2.38	2.18	0.232433	0.116216
YJL153C	2.825	2.3	2.615	2.58	0.264244	0.132122
YBL043W	0.565	0.155	0.36	0.36	0.205	0.1025
YGL189C	-0.495	-1.01	-0.765	-0.756667	0.257601	0.128801
YMR116	0.585	-1.03	-0.67	-0.371667	0.847826	0.423913
YJL130C	-0.565	-0.88	-1.07	-0.838333	0.255065	0.127533
YNR062C	1.82	1.635	1.47	1.64167	0.175095	0.0875476
YBL077W	-0.18	-0.145	1.1725	0.2825	0.770961	0.385481
YHR216W	-0.89	-1.485	-1.215	-1.19667	0.297923	0.148962
YBR263	-0.56	-2.16	-1.885	-1.535	0.855497	0.427748
RNA-Seq vs RT-PCR
	dcp2_RNA-seq	dcp2_RT-PCR
YOR178C	3.60622	2.9325
YHL024W	3.20131	2.08
YJL153C	2.19909	2.5625
YBL043W	0.929611	0.36
YGL189C	-0.350546	-0.7525
YMR116	-0.462934	-0.2225
YJL130C	-0.624217	-0.7225
YNR062C	-0.628683	1.7275
YBL077W	-0.678063	-0.1625
YHR216W	-0.72932	-1.1875
YBR263	-1.57029	-1.36
