# Supplementary material for: Decapping factor Dcp2 controls mRNA abundance and translation to adjust metabolism and filamentation to nutrient availability
Source: eLife journal article supplement (doi:10.7554/elife.85545), 2023-06-02
Supplement: fig1-data3 [file Figure 1 – source data 3.xlsx]

## Sheet: dcp2 vs dcp2-EE RNA-Seq
gene_ID	log2FC_mRNA	pvalue
YAL063C	0.375255	0.12828
YAL054C	-0.221721	0.583533
YAL049C	0.121343	0.592048
YAL047C	0.0661612	0.866793
YAL046C	-0.498912	0.130501
YAL044C	-0.00321002	0.987684
YAL043C	0.0505688	0.824391
YAL040C	0.197097	0.33926
YAL039C	0.273909	0.264704
YAL036C	-0.0867706	0.674629
YAL034C	0.226932	0.429861
YAL032C	0.339225	0.30183
YAL031C	0.295031	0.324427
YAL029C	0.19211	0.473506
YAL026C-A	0.168551	0.781754
YAL026C	-0.0128734	0.95365
YAL025C	-0.175782	0.515142
YAL024C	0.217006	0.542941
YAL023C	-0.00575571	0.977326
YAL022C	-0.175461	0.44356
YAL021C	-0.0824242	0.691423
YAL020C	0.254459	0.449994
YAL015C	0.0623692	0.834927
YAL014C	0.0971392	0.74359
YAL010C	0.117761	0.699902
YAL007C	-0.162356	0.49052
YAL005C	-0.0801041	0.725665
YAL001C	0.206084	0.549291
YAR002C-A	-0.104529	0.627055
YAR007C	-0.158439	0.413888
YAR014C	0.252434	0.258063
YAR018C	-0.157958	0.531261
YAR019C	0.19786	0.483154
YAR023C	-0.0618841	0.91481
YAL064W-B	0.200293	0.792872
YAL062W	-0.527231	0.245856
YAL061W	0.235181	0.524799
YAL060W	-0.0241585	0.911593
YAL059W	-0.355835	0.205142
YAL058W	0.0915512	0.747511
YAL056W	0.110228	0.69717
YAL055W	-0.460797	0.338754
YAL053W	0.0112909	0.956123
YAL051W	-0.116712	0.645569
YAL044W-A	0.120579	0.683004
YAL042W	-0.214289	0.356985
YAL041W	0.126075	0.5823
YAL038W	-0.0370213	0.894967
YAL037W	0.877899	0.285173
YAL035W	0.0666143	0.720813
YAL034W-A	0.0481215	0.911319
YAL033W	0.0614822	0.841726
YAL030W	-0.232645	0.453317
YAL028W	0.650603	0.129114
YAL027W	-0.229838	0.518377
YAL019W	0.0899386	0.675343
YAL017W	0.165863	0.421756
YAL016W	-0.0598627	0.743485
YAL013W	0.123697	0.6698
YAL012W	-0.0138858	0.944254
YAL011W	0.160023	0.628943
YAL009W	0.160567	0.671677
YAL008W	0.112819	0.740277
YAL003W	-0.0150559	0.947779
YAL002W	0.483643	0.0634608
YAR002W	0.0290872	0.892615
YAR003W	-0.148173	0.639335
YAR008W	0.268283	0.49587
YAR015W	-0.212202	0.341219
YAR027W	0.122289	0.62599
YAR028W	-0.107926	0.742638
YAR031W	-0.235019	0.533432
YAR033W	0.0201893	0.962183
YAR035W	-0.0720026	0.878756
YAR042W	0.161914	0.436061
YAR050W	0.308578	0.189117
YAR071W	0.0179318	0.948326
YBL113C	0.366951	0.0406854
YBL107C	0.297921	0.335261
YBL106C	-0.190821	0.59176
YBL105C	0.287823	0.268078
YBL104C	0.146942	0.564172
YBL103C	0.2123	0.458473
YBL101C	0.335596	0.179686
YBL093C	0.194093	0.497592
YBL091C-A	0.0772285	0.842198
YBL091C	0.131349	0.561213
YBL088C	0.235808	0.460579
YBL087C	-0.142207	0.55691
YBL086C	0.355784	0.302231
YBL084C	0.232596	0.561304
YBL080C	0.0430494	0.902399
YBL078C	0.215712	0.541468
YBL076C	-0.115791	0.512074
YBL075C	0.037996	0.89541
YBL074C	0.124772	0.734578
YBL072C	-0.0732482	0.759838
YBL067C	0.183825	0.477004
YBL066C	0.24248	0.354738
YBL064C	-0.03714	0.877032
YBL061C	0.0660784	0.792377
YBL059C-A	-0.0419459	0.893347
YBL057C	-0.0835282	0.779796
YBL055C	-0.0441611	0.872505
YBL052C	0.0986718	0.803482
YBL051C	0.248294	0.211922
YBL047C	0.299026	0.0863439
YBL045C	0.0132982	0.947505
YBL042C	-0.0911041	0.674007
YBL040C	-0.0702782	0.765175
YBL039C	-0.252437	0.182068
YBL036C	-0.223759	0.345281
YBL035C	0.0944577	0.722428
YBL034C	0.188359	0.539222
YBL033C	-0.218786	0.360935
YBL030C	-0.028572	0.888482
YBL029C-A	0.134179	0.679876
YBL028C	-0.543475	0.0875841
YBL023C	-0.186951	0.379484
YBL022C	0.13989	0.47817
YBL021C	0.120671	0.76593
YBL018C	-0.0864777	0.794055
YBL017C	-0.0254211	0.895968
YBL014C	0.00412921	0.989105
YBL010C	0.228549	0.506958
YBL007C	0.136988	0.449429
YBL006C	-0.0139149	0.958121
YBL003C	0.0203059	0.924827
YBL001C	0.153575	0.509196
YBR001C	-0.117867	0.607809
YBR002C	-0.291488	0.361715
YBR004C	0.0223312	0.939129
YBR007C	0.289314	0.251073
YBR008C	-0.0232686	0.933985
YBR009C	0.225192	0.24415
YBR011C	-0.18383	0.412062
YBR014C	0.123827	0.624798
YBR015C	-0.0775444	0.713507
YBR017C	-0.160129	0.423212
YBR023C	0.00467867	0.981522
YBR025C	0.0664423	0.703563
YBR026C	-0.0232651	0.912648
YBR028C	-0.0263922	0.916949
YBR029C	-0.202139	0.306063
YBR034C	-0.217403	0.326338
YBR035C	0.00976836	0.963809
YBR036C	-0.154185	0.442262
YBR037C	-0.0189786	0.94082
YBR042C	-0.403295	0.194179
YBR043C	0.0422878	0.845603
YBR044C	-0.00947483	0.974546
YBR045C	0.127816	0.790852
YBR046C	-0.0883612	0.751628
YBR049C	0.126426	0.625495
YBR050C	0.328936	0.724049
YBR052C	-0.191513	0.372106
YBR053C	-0.0331898	0.880584
YBR055C	0.156712	0.585178
YBR057C	0.0717664	0.791054
YBR058C	0.0278287	0.892327
YBR058C-A	0.122245	0.701334
YBR059C	0.208697	0.289128
YBR060C	0.0541287	0.834992
YBR061C	-0.253726	0.273134
YBR062C	0.174335	0.574319
YBR063C	0.309736	0.419658
YBR065C	0.166157	0.563218
YBR066C	-0.160417	0.665704
YBR067C	0.110874	0.690725
YBR068C	-0.0857962	0.629701
YBR069C	-0.197165	0.321697
YBR070C	-0.0800245	0.809287
YBR076C-A	0.172117	0.741123
YBR077C	-0.14774	0.551032
YBR079C	0.0351379	0.838833
YBR080C	0.0332503	0.862822
YBR081C	0.215447	0.517326
YBR082C	0.0157377	0.945959
YBR084C-A	-0.0546141	0.801644
YBR085C-A	-0.239744	0.224695
YBR086C	-0.00721849	0.967361
YBR088C	-0.123088	0.544601
YBR089C-A	0.00564798	0.981088
YBR091C	0.0640899	0.842094
YBR092C	-0.0885361	0.688766
YBR093C	-0.0914294	0.694706
YBR095C	0.0159572	0.95242
YBR101C	-0.151004	0.477846
YBR102C	0.115987	0.618342
YBR105C	-0.0276048	0.930338
YBR107C	0.193302	0.719593
YBR109C	0.00419038	0.983507
YBR111C	-0.0063875	0.974438
YBR112C	0.294256	0.214766
YBR115C	-0.0907057	0.609074
YBR120C	-0.0434007	0.880529
YBR121C	-0.19572	0.272356
YBR122C	-0.117968	0.623652
YBR123C	0.0409429	0.874737
YBR125C	-0.117573	0.694391
YBR126C	0.0401594	0.821508
YBR127C	-0.0218819	0.915135
YBR128C	0.556619	0.452757
YBR129C	-0.0800468	0.781605
YBR130C	-0.000539293	0.998272
YBR132C	0.0980166	0.703719
YBR133C	0.145409	0.532188
YBR138C	0.108249	0.698767
YBR140C	0.166859	0.42999
YBR141C	0.0451324	0.900288
YBR143C	-0.062741	0.730403
YBR150C	0.456073	0.207844
YBR154C	-0.0195171	0.930124
YBR156C	0.240651	0.434866
YBR157C	0.52535	0.357747
YBR162C	-0.0165947	0.93005
YBR164C	-0.171145	0.461796
YBR166C	-0.180929	0.391751
YBR167C	-0.308721	0.440171
YBR169C	-0.0162956	0.940735
YBR170C	-0.0553635	0.806443
YBR172C	0.213167	0.358531
YBR173C	-0.112714	0.653194
YBR177C	-0.160447	0.393171
YBR179C	-0.104944	0.678435
YBR181C	-0.123803	0.592975
YBR182C	0.135304	0.707826
YBR185C	-0.00604639	0.980853
YBR188C	-0.269534	0.391629
YBR193C	-0.0554782	0.850601
YBR195C	-0.165455	0.611876
YBR196C	-0.121762	0.576914
YBR197C	0.119396	0.700624
YBR198C	0.169179	0.446341
YBR204C	0.339323	0.256877
YBR208C	0.178292	0.409427
YBR211C	-0.105949	0.772172
YBR216C	-0.0417994	0.881873
YBR218C	-0.035203	0.856102
YBR221C	-0.0993236	0.594761
YBR222C	0.035618	0.868904
YBR223C	0.339277	0.322747
YBR229C	0.0340667	0.869043
YBR230C	-0.066707	0.762179
YBR231C	-0.0634445	0.866727
YBR234C	-0.248996	0.195858
YBR236C	-0.131485	0.567762
YBR238C	-0.0664222	0.785513
YBR239C	0.243924	0.396549
YBR240C	-0.289265	0.586723
YBR241C	-0.0184314	0.956148
YBR243C	-0.0990745	0.710566
YBR245C	-0.0390806	0.842294
YBR247C	0.051687	0.809187
YBR248C	-0.159517	0.453936
YBR249C	-0.143704	0.530287
YBR254C	-0.148365	0.647204
YBR255C-A	-0.305024	0.459174
YBR256C	-0.017322	0.938597
YBR258C	-0.447417	0.355677
YBR260C	0.0730961	0.775402
YBR261C	-0.161888	0.525517
YBR262C	-0.44413	0.123783
YBR264C	0.0722018	0.831617
YBR269C	-0.290256	0.243481
YBR270C	0.403164	0.347199
YBR272C	-0.143748	0.584618
YBR273C	0.186256	0.435534
YBR275C	0.0695203	0.789042
YBR276C	0.247279	0.341253
YBR280C	-0.103782	0.749756
YBR281C	-0.0750434	0.762411
YBR283C	-0.170006	0.364845
YBR288C	-0.115835	0.605198
YBR291C	-0.009773	0.970821
YBR296C	0.0364667	0.962347
YBR298C	0.187397	0.567706
YBL102W	0.139983	0.555357
YBL099W	0.0190271	0.919045
YBL098W	0.233571	0.419495
YBL097W	0.17102	0.676182
YBL095W	0.00854271	0.981649
YBL092W	-0.0143201	0.953726
YBL090W	0.00300774	0.990439
YBL089W	-0.16108	0.569801
YBL085W	0.229332	0.374668
YBL081W	0.196143	0.456277
YBL079W	0.0815261	0.667289
YBL071W-A	-0.184792	0.534785
YBL068W	-0.168943	0.467057
YBL063W	-0.173766	0.679226
YBL060W	0.287326	0.406164
YBL059W	-0.157598	0.661943
YBL058W	-0.100818	0.600969
YBL056W	0.052796	0.797217
YBL054W	0.198043	0.457898
YBL050W	-0.168856	0.424341
YBL048W	-0.144102	0.894572
YBL046W	0.0102615	0.971517
YBL043W	0.00212871	0.996383
YBL041W	-0.178423	0.375184
YBL039W-B	0.0774623	0.908489
YBL038W	-0.0747706	0.738616
YBL037W	-0.0262603	0.914743
YBL032W	0.0723089	0.743042
YBL031W	0.316136	0.437682
YBL029W	0.360771	0.404196
YBL027W	0.00832887	0.971385
YBL026W	-0.0576222	0.839833
YBL025W	-0.221319	0.569419
YBL024W	-0.165283	0.418827
YBL020W	-0.113851	0.709367
YBL019W	0.103561	0.777236
YBL016W	0.0521502	0.833881
YBL015W	0.126213	0.642303
YBL011W	0.0847528	0.712296
YBL009W	-0.0194252	0.937715
YBL008W	-0.0570246	0.839023
YBL005W	0.215205	0.4868
YBL004W	0.0517687	0.814902
YBL002W	-0.0121213	0.948572
YBR003W	0.0471314	0.84843
YBR005W	-0.0790551	0.781337
YBR006W	-0.34676	0.264272
YBR010W	-0.0664075	0.770286
YBR016W	-0.137177	0.587279
YBR020W	0.413073	0.432863
YBR021W	-0.05282	0.817336
YBR022W	-0.0598002	0.857118
YBR024W	0.0572951	0.854166
YBR030W	0.0374468	0.890078
YBR031W	-0.034211	0.891756
YBR033W	0.30448	0.445317
YBR038W	-0.103794	0.62059
YBR039W	-0.109215	0.634282
YBR041W	-0.0347702	0.880943
YBR047W	0.11616	0.873029
YBR048W	-0.0374457	0.882639
YBR054W	0.0743012	0.720612
YBR056W	0.172205	0.457123
YBR056W-A	0.058928	0.874689
YBR071W	0.0413436	0.84082
YBR072W	0.267349	0.391613
YBR073W	0.154069	0.462152
YBR074W	0.0340099	0.86948
YBR078W	-0.0166197	0.927305
YBR083W	0.0747224	0.77138
YBR084W	-0.0740915	0.701776
YBR087W	0.0168193	0.94382
YBR094W	0.122757	0.643408
YBR096W	-0.0949796	0.695328
YBR097W	0.104298	0.709455
YBR098W	0.228102	0.636699
YBR103W	-0.128629	0.620852
YBR104W	-0.332591	0.254648
YBR106W	-0.15881	0.426055
YBR108W	0.438787	0.0510987
YBR110W	-0.141397	0.571074
YBR111W-A	-0.252979	0.438406
YBR114W	0.105187	0.698131
YBR118W	-0.0854886	0.762573
YBR119W	-0.067413	0.834206
YBR131W	-0.282734	0.40689
YBR135W	0.0732526	0.769686
YBR136W	0.0619979	0.809332
YBR137W	0.119508	0.661931
YBR139W	0.00951463	0.962022
YBR142W	0.0814606	0.753412
YBR145W	-0.0900892	0.779442
YBR146W	0.00565159	0.980417
YBR147W	-0.00316107	0.994747
YBR148W	0.112256	0.871451
YBR149W	-0.0687269	0.711497
YBR151W	0.209522	0.374886
YBR152W	0.0948464	0.839024
YBR153W	-0.0632363	0.842754
YBR155W	0.055613	0.835192
YBR158W	-0.114713	0.567127
YBR159W	0.0512341	0.799385
YBR160W	0.00435992	0.983976
YBR161W	-0.0831364	0.766311
YBR162W-A	-0.19383	0.502407
YBR163W	0.180342	0.584022
YBR165W	-0.0909303	0.771053
YBR168W	0.304137	0.405506
YBR171W	-0.0420787	0.862047
YBR175W	-0.115923	0.722879
YBR176W	-0.446165	0.184842
YBR183W	0.0866028	0.730368
YBR184W	0.254352	0.61683
YBR187W	-0.207113	0.411667
YBR189W	-0.0598266	0.804557
YBR192W	0.0399654	0.894484
YBR194W	-0.483499	0.202667
YBR199W	-0.125373	0.557195
YBR200W	0.225299	0.408349
YBR201W	0.138606	0.731646
YBR202W	-0.120702	0.594659
YBR203W	0.269719	0.320805
YBR205W	-0.13741	0.543505
YBR207W	0.0439581	0.850342
YBR210W	-0.194321	0.576912
YBR212W	0.0253811	0.903683
YBR213W	-0.505971	0.250776
YBR214W	0.340669	0.105682
YBR215W	0.135627	0.632971
YBR217W	-0.163994	0.711988
YBR225W	0.0861334	0.738743
YBR228W	-0.242019	0.582887
YBR230W-A	0.304857	0.370035
YBR233W	0.147927	0.606062
YBR233W-A	-0.309458	0.544366
YBR235W	-0.0684415	0.762829
YBR237W	0.107833	0.731223
YBR242W	-0.324868	0.227381
YBR244W	-0.0977723	0.827749
YBR246W	-0.0165798	0.949917
YBR251W	-0.057264	0.815395
YBR252W	-0.489052	0.0849506
YBR253W	0.221333	0.511822
YBR255W	0.148475	0.682059
YBR257W	-0.00264138	0.994016
YBR259W	-0.205293	0.507876
YBR263W	-0.216674	0.315795
YBR265W	0.035307	0.888305
YBR267W	-0.100461	0.704277
YBR268W	-0.123899	0.676143
YBR271W	-0.0731509	0.810835
YBR274W	-0.0737831	0.786428
YBR278W	0.174746	0.617424
YBR279W	0.116612	0.629523
YBR282W	-0.122753	0.624763
YBR284W	0.133846	0.741798
YBR286W	-0.127624	0.48855
YBR287W	-0.0552623	0.791903
YBR289W	0.0740663	0.764292
YBR290W	0.188068	0.522695
YBR293W	0.0213488	0.94212
YBR294W	0.00471883	0.995896
YBR295W	0.425647	0.157247
YBR297W	-0.0436535	0.886399
YBR299W	0.0420521	0.910881
YCL064C	-0.147033	0.672209
YCL061C	0.0682239	0.80823
YCL059C	-0.114386	0.554168
YCL057C-A	-0.017231	0.935858
YCL056C	0.100961	0.77669
YCL052C	0.0533173	0.794323
YCL050C	-0.0153257	0.940513
YCL049C	0.148707	0.523879
YCL047C	-0.124579	0.64874
YCL045C	0.00012144	0.999452
YCL044C	0.072599	0.757489
YCL043C	-0.0145851	0.949141
YCL041C	-0.0174692	0.945037
YCL038C	-0.0187241	0.937143
YCL037C	0.0900002	0.682709
YCL035C	-0.155132	0.443564
YCL033C	-0.0420705	0.851689
YCL031C	-0.0468072	0.857766
YCL030C	-0.104509	0.560572
YCL029C	0.0477583	0.868999
YCL026C-B	-0.194641	0.582943
YCL025C	-0.0266555	0.882897
YCL017C	-0.0181218	0.926181
YCL016C	0.0238867	0.92814
YCL012C	0.27664	0.294143
YCL011C	0.0395042	0.846019
YCL010C	0.0346708	0.875646
YCL009C	0.053806	0.823592
YCL008C	-0.117125	0.629083
YCL002C	0.0433745	0.879158
YCR002C	-0.0588894	0.753553
YCR004C	0.0320629	0.859956
YCR005C	0.0400038	0.814503
YCR007C	-0.00998452	0.977284
YCR009C	-0.0144978	0.93597
YCR011C	-0.0545336	0.775335
YCR014C	0.179586	0.675876
YCR015C	-0.160081	0.554919
YCR017C	0.00764143	0.968202
YCR020C	-0.0896798	0.800136
YCR020C-A	-0.220344	0.39879
YCR021C	0.4443	0.199373
YCR023C	-0.0693858	0.745738
YCR024C	0.00771807	0.973689
YCR024C-B	0.362262	0.0759969
YCR024C-A	0.371042	0.209539
YCR026C	0.0477583	0.800394
YCR027C	-0.122315	0.64202
YCR028C	-0.133825	0.556019
YCR028C-A	-0.159932	0.423077
YCR030C	0.159195	0.366442
YCR031C	-0.131306	0.635164
YCR035C	0.0685603	0.759683
YCR037C	-0.0985754	0.605667
YCR038C	0.150343	0.608659
YCR042C	0.143006	0.528098
YCR043C	-0.162001	0.467413
YCR044C	0.117498	0.630315
YCR046C	-0.0341802	0.872483
YCR047C	-0.249093	0.297218
YCR054C	-0.0251512	0.905514
YCR057C	-0.155721	0.439814
YCR059C	0.0798189	0.720651
YCR067C	0.013155	0.942814
YCR071C	-0.154201	0.483559
YCR072C	-0.207867	0.374397
YCR073C	0.285945	0.219082
YCR075C	-0.0492654	0.868274
YCR076C	0.0717734	0.779313
YCR077C	0.0325275	0.852732
YCR084C	0.178204	0.338898
YCR087C-A	-0.493658	0.0476628
YCR090C	-0.198532	0.387799
YCR092C	-0.0796134	0.739089
YCR095C	0.160094	0.540408
YCR098C	9.26818e-05	0.999772
YCR102C	-0.128952	0.838652
YCL063W	-0.187934	0.419296
YCL058W-A	-0.531003	0.100057
YCL057W	-0.0673458	0.718509
YCL055W	0.0755664	0.761304
YCL054W	-0.026965	0.898678
YCL051W	0.195095	0.362616
YCL048W	-0.351022	0.64308
YCL040W	-0.0304684	0.875135
YCL039W	0.096826	0.641696
YCL036W	-0.157988	0.550468
YCL034W	-0.052257	0.793235
YCL032W	0.168185	0.472455
YCL028W	-0.060545	0.767451
YCL027W	0.490591	0.309611
YCL024W	0.214344	0.338404
YCL021W-A	-0.421273	0.589851
YCL018W	0.1849	0.47562
YCL014W	0.206416	0.356454
YCL005W-A	0.0664874	0.767707
YCL005W	-0.143482	0.609238
YCL004W	0.236488	0.341129
YCL001W	-0.12365	0.549024
YCR003W	-0.142625	0.508544
YCR008W	0.152274	0.475964
YCR012W	-0.124375	0.666914
YCR016W	-0.0713249	0.807804
YCR019W	0.0370977	0.89046
YCR020W-B	-0.0200205	0.956648
YCR032W	0.0692578	0.81369
YCR033W	0.313191	0.278482
YCR034W	-0.207348	0.282653
YCR036W	-0.181772	0.360047
YCR045W-A	0.205895	0.662994
YCR048W	-0.0510288	0.846962
YCR051W	-0.185912	0.429945
YCR052W	0.0478311	0.81101
YCR053W	-0.0569526	0.789312
YCR061W	0.113448	0.594887
YCR063W	0.293312	0.283129
YCR065W	0.0882911	0.664948
YCR066W	0.215617	0.450171
YCR068W	0.128067	0.581416
YCR069W	0.212155	0.290562
YCR073W-A	0.0544299	0.802516
YCR075W-A	-0.125372	0.695223
YCR079W	0.169901	0.556042
YCR081W	0.172969	0.527467
YCR082W	-0.069663	0.771037
YCR083W	-0.223812	0.358441
YCR086W	0.0706715	0.784616
YCR088W	0.0364219	0.85323
YCR089W	0.309017	0.165612
YCR091W	0.264425	0.379372
YCR093W	0.18959	0.317658
YCR094W	-0.0673159	0.739489
YCR095W-A	0.0616804	0.941565
YCR105W	-0.167152	0.793467
YCR106W	-0.0485714	0.838242
YCR107W	0.1437	0.651445
YDL243C	0.210208	0.568701
YDL239C	0.237631	0.691233
YDL238C	-0.00656628	0.984896
YDL235C	-0.241783	0.349266
YDL234C	0.281675	0.264843
YDL231C	0.177111	0.486881
YDL227C	-0.420834	0.169459
YDL226C	-0.0517235	0.805495
YDL224C	0.146293	0.472309
YDL222C	-0.165965	0.661597
YDL220C	0.218425	0.456166
YDL217C	-0.298342	0.243434
YDL216C	-0.0907715	0.815083
YDL215C	0.094358	0.657193
YDL214C	0.520143	0.407156
YDL213C	-0.133375	0.583586
YDL211C	-0.232779	0.551944
YDL209C	-0.147851	0.656758
YDL205C	-0.0399669	0.90099
YDL203C	-0.0378009	0.869706
YDL200C	-0.232507	0.600734
YDL199C	0.111892	0.782251
YDL198C	-0.0989038	0.627179
YDL197C	0.312176	0.272483
YDL190C	0.0316865	0.87495
YDL188C	-0.193455	0.359458
YDL187C	-0.0472932	0.962145
YDL184C	-0.00772538	0.978163
YDL183C	-0.0501657	0.903818
YDL177C	0.198238	0.678002
YDL175C	-0.108708	0.699408
YDL174C	-0.00993525	0.984991
YDL171C	0.0546002	0.753121
YDL169C	-0.195373	0.720639
YDL167C	0.0170827	0.938989
YDL166C	0.127641	0.64989
YDL164C	-0.0901154	0.700113
YDL160C-A	-0.218982	0.668113
YDL160C	-0.129407	0.494402
YDL157C	-0.31653	0.23768
YDL153C	-0.111116	0.734479
YDL148C	0.0492738	0.85993
YDL145C	-0.0097754	0.955629
YDL144C	0.0961556	0.736011
YDL142C	-0.0116995	0.970706
YDL140C	0.176474	0.34737
YDL139C	-0.316826	0.481913
YDL135C	0.044176	0.860491
YDL134C	-0.0309372	0.876854
YDL133C-A	-0.00772538	0.978163
YDL126C	-0.0439239	0.811646
YDL125C	0.0505503	0.812346
YDL121C	-0.155075	0.542133
YDL119C	-0.066553	0.822653
YDL115C	-0.192473	0.565048
YDL113C	0.11161	0.692251
YDL111C	-0.098247	0.683122
YDL110C	0.0898956	0.691914
YDL109C	0.109572	0.723825
YDL106C	0.318361	0.213753
YDL104C	0.0276708	0.945536
YDL103C	-0.164362	0.421707
YDL101C	0.0844134	0.73882
YDL100C	-0.0249926	0.894456
YDL098C	-0.529761	0.301737
YDL097C	-0.060747	0.741206
YDL091C	-0.0409292	0.898712
YDL090C	0.31858	0.339934
YDL088C	0.141008	0.534277
YDL087C	0.297665	0.426364
YDL085C-A	-0.191951	0.662869
YDL083C	-0.113212	0.611326
YDL081C	-0.258077	0.236217
YDL080C	0.22508	0.396245
YDL079C	-0.475163	0.408069
YDL078C	0.0150214	0.941252
YDL077C	0.143018	0.579709
YDL076C	0.114855	0.689912
YDL074C	-0.00629737	0.982047
YDL072C	-0.170003	0.399124
YDL069C	-0.325646	0.527716
YDL067C	-0.165615	0.49498
YDL065C	-0.100241	0.782656
YDL063C	-0.188235	0.43066
YDL061C	-0.066569	0.783601
YDL059C	0.139848	0.791329
YDL055C	-0.00678515	0.971104
YDL054C	-0.286056	0.350628
YDL053C	-0.107412	0.680849
YDL052C	-0.122233	0.602587
YDL049C	0.0188005	0.968682
YDL048C	0.339146	0.292631
YDL045C	0.414741	0.197327
YDL044C	0.158207	0.693623
YDL043C	-0.0522253	0.885909
YDL042C	-0.185185	0.48982
YDL040C	-0.0180016	0.923065
YDL039C	0.186185	0.691975
YDL036C	0.0930824	0.765029
YDL035C	-0.0401081	0.907541
YDL033C	0.103069	0.792088
YDL028C	-0.0273345	0.929048
YDL027C	0.15376	0.660024
YDL025C	0.27056	0.278828
YDL024C	0.10882	0.881252
YDL020C	-0.0526065	0.810668
YDL019C	0.137475	0.542037
YDL018C	-0.280244	0.293147
YDL015C	0.0134793	0.947267
YDL012C	0.106947	0.680079
YDL005C	0.0798196	0.764145
YDL002C	-0.175905	0.634089
YDR001C	0.0775368	0.679584
YDR005C	0.208645	0.42017
YDR006C	0.0818138	0.715351
YDR008C	-0.359947	0.678353
YDR016C	-0.381416	0.32374
YDR017C	0.158964	0.501161
YDR018C	0.136339	0.758951
YDR019C	-0.191635	0.445489
YDR020C	0.211498	0.535063
YDR022C	-0.239094	0.512
YDR026C	0.214354	0.492533
YDR027C	0.11943	0.70364
YDR028C	0.225603	0.375515
YDR030C	-0.0135612	0.973309
YDR032C	-0.0946086	0.624863
YDR034C	0.0701447	0.788331
YDR036C	-0.152153	0.55133
YDR038C	-0.14274	0.501775
YDR045C	-0.335453	0.283428
YDR046C	-0.0838776	0.680877
YDR050C	-0.0927704	0.701814
YDR051C	-0.0830512	0.751708
YDR052C	0.103764	0.717269
YDR054C	0.0716045	0.740202
YDR056C	-0.148622	0.552638
YDR058C	-0.465409	0.275223
YDR059C	0.0231519	0.937003
YDR066C	0.394084	0.422892
YDR067C	0.0143155	0.964498
YDR069C	0.0428553	0.885964
YDR071C	-0.194958	0.354618
YDR072C	0.0446901	0.82565
YDR078C	-0.210087	0.658613
YDR079C-A	-0.51598	0.241723
YDR081C	0.0066352	0.980969
YDR084C	-0.0468611	0.865938
YDR085C	0.189284	0.526152
YDR086C	-0.0855462	0.709481
YDR087C	-0.322192	0.187808
YDR088C	-0.0854509	0.828771
YDR090C	-0.0949164	0.749671
YDR091C	-0.175401	0.345246
YDR097C	0.123205	0.624118
YDR098C	-0.161005	0.458492
YDR101C	-0.180818	0.330727
YDR104C	0.358575	0.313569
YDR105C	-0.121027	0.650449
YDR107C	-0.0889187	0.787368
YDR109C	0.136606	0.621579
YDR111C	-0.211316	0.454374
YDR113C	0.10864	0.689809
YDR116C	-0.0365735	0.875729
YDR117C	0.0576132	0.822209
YDR120C	-0.233592	0.326026
YDR123C	0.0110023	0.972346
YDR125C	0.0512007	0.906927
YDR129C	-0.128215	0.488355
YDR130C	0.330467	0.29119
YDR131C	0.284433	0.372896
YDR132C	0.0237179	0.952619
YDR133C	0.25174	0.251814
YDR135C	0.0312194	0.865912
YDR139C	0.292043	0.360943
YDR141C	0.0760415	0.708875
YDR142C	-0.1302	0.69371
YDR143C	-0.0261678	0.917727
YDR144C	-0.0765858	0.735704
YDR146C	0.229633	0.282256
YDR148C	-0.084185	0.691752
YDR151C	0.0319904	0.899246
YDR153C	0.190071	0.393693
YDR162C	-0.0379834	0.899836
YDR164C	-0.0725762	0.767565
YDR166C	0.0518065	0.853965
YDR169C	0.293696	0.218619
YDR170C	0.117777	0.541559
YDR173C	0.291212	0.394469
YDR175C	-0.0105248	0.965031
YDR179C	-0.154836	0.761945
YDR181C	0.0371206	0.90471
YDR185C	-0.500188	0.3172
YDR186C	0.175567	0.477548
YDR190C	-0.0580914	0.760744
YDR192C	-0.326433	0.269486
YDR194C	0.0602816	0.786546
YDR196C	-0.0377346	0.890973
YDR198C	-0.173933	0.619954
YDR200C	0.247735	0.46025
YDR202C	-0.0567833	0.848509
YDR207C	0.0991566	0.704997
YDR217C	-0.0108173	0.974281
YDR219C	0.249555	0.431544
YDR224C	0.173619	0.372966
YDR228C	0.289036	0.27644
YDR231C	-0.0372339	0.886327
YDR233C	0.0529317	0.787859
YDR236C	-0.197637	0.533476
YDR238C	0.000206009	0.999077
YDR239C	0.0390618	0.883069
YDR240C	-0.0780675	0.830749
YDR243C	0.172483	0.542145
YDR248C	0.132286	0.671127
YDR249C	-0.308738	0.432691
YDR255C	0.0800129	0.81608
YDR256C	-0.212724	0.789648
YDR257C	0.0848781	0.727735
YDR258C	0.0112186	0.950934
YDR259C	0.478931	0.328182
YDR260C	-0.320998	0.328052
YDR261C	0.213477	0.339199
YDR263C	0.440008	0.365279
YDR264C	-0.00985413	0.963008
YDR266C	0.066006	0.760559
YDR267C	-0.189421	0.540845
YDR276C	0.103715	0.683718
YDR277C	0.190862	0.44347
YDR282C	0.107996	0.788079
YDR283C	0.129399	0.628658
YDR284C	0.0316378	0.893255
YDR286C	-0.191024	0.653603
YDR289C	0.221222	0.462757
YDR292C	0.00291531	0.990536
YDR293C	0.204869	0.274972
YDR294C	-0.0232524	0.908716
YDR295C	0.225616	0.438859
YDR298C	-0.0605864	0.765379
YDR300C	-0.246742	0.34442
YDR303C	0.0606519	0.80566
YDR304C	-0.214809	0.295209
YDR305C	-0.187386	0.531963
YDR306C	0.0772921	0.78615
YDR308C	0.214714	0.463576
YDR309C	0.227201	0.258779
YDR310C	0.292593	0.250091
YDR313C	0.0131128	0.970294
YDR314C	0.0889716	0.811866
YDR315C	0.469884	0.289043
YDR319C	-0.268792	0.377923
YDR320C	0.0499258	0.821659
YDR320C-A	-0.278351	0.420408
YDR322C-A	0.0731035	0.749566
YDR323C	-0.104201	0.808718
YDR324C	0.00713515	0.973119
YDR326C	0.234626	0.337547
YDR328C	-0.118628	0.568607
YDR329C	0.137809	0.617415
YDR333C	-0.150998	0.48692
YDR338C	0.0986862	0.756736
YDR339C	-0.0295189	0.904298
YDR341C	-0.197677	0.282314
YDR342C	0.133665	0.446595
YDR343C	0.133512	0.446454
YDR345C	-0.0715266	0.689104
YDR346C	-0.101594	0.626965
YDR348C	0.01436	0.948193
YDR349C	-0.00309278	0.98999
YDR350C	0.0816757	0.755102
YDR357C	0.0377956	0.904948
YDR359C	0.227754	0.357888
YDR361C	-0.283292	0.259915
YDR362C	0.0772807	0.808449
YDR364C	0.260185	0.379114
YDR365C	0.0169802	0.945922
YDR366C	0.136073	0.538043
YDR369C	0.0230355	0.951241
YDR370C	0.0119839	0.967622
YDR372C	-0.0525039	0.804641
YDR375C	0.193804	0.453814
YDR378C	0.0690485	0.804407
YDR379C-A	-0.192299	0.625284
YDR381C-A	0.231702	0.489288
YDR383C	-0.118153	0.771139
YDR384C	-0.103827	0.862794
YDR387C	0.111272	0.716901
YDR390C	0.0485118	0.832103
YDR391C	0.086591	0.718763
YDR397C	-0.0708083	0.788704
YDR402C	0.0868514	0.918036
YDR404C	-0.239504	0.369396
YDR407C	0.301666	0.217136
YDR408C	-0.112986	0.63689
YDR410C	-0.426146	0.229394
YDR411C	-0.11621	0.618488
YDR414C	-0.103113	0.767374
YDR415C	-0.235256	0.384096
YDR422C	0.260187	0.276072
YDR423C	0.182748	0.542163
YDR424C	-0.212306	0.517423
YDR428C	0.0541944	0.863026
YDR429C	-0.0503701	0.781672
YDR430C	0.0277948	0.902761
YDR435C	-0.195291	0.494264
YDR441C	0.258235	0.409511
YDR443C	0.235997	0.397768
YDR445C	-0.0100604	0.990229
YDR447C	-0.147042	0.540893
YDR449C	-0.191791	0.447879
YDR451C	-0.0843354	0.712983
YDR453C	0.0786764	0.85974
YDR454C	-0.0966369	0.660734
YDR458C	0.099079	0.721715
YDR459C	0.0316407	0.919851
YDR461C-A	-0.294923	0.601823
YDR465C	-0.100555	0.655796
YDR468C	-0.230848	0.405246
YDR470C	-0.267781	0.330121
YDR473C	-0.0354624	0.920658
YDR475C	0.199721	0.471217
YDR476C	-0.170584	0.588084
YDR479C	-0.0885814	0.760832
YDR481C	-0.194247	0.392932
YDR482C	0.283922	0.576583
YDR485C	0.245609	0.452989
YDR486C	-0.188243	0.447847
YDR487C	-0.0469474	0.822528
YDR488C	-0.299796	0.470648
YDR490C	0.0823415	0.750819
YDR495C	-0.0549777	0.881164
YDR496C	-0.112154	0.567125
YDR497C	-0.0962654	0.622281
YDR498C	0.0304553	0.913715
YDR500C	0.0181169	0.938161
YDR502C	-0.0408687	0.828462
YDR503C	-0.0334374	0.929915
YDR504C	-0.489697	0.34957
YDR505C	0.248717	0.311074
YDR506C	0.029588	0.935105
YDR507C	0.142631	0.536196
YDR508C	-0.0173495	0.921408
YDR512C	-0.410346	0.255964
YDR514C	-0.379518	0.221322
YDR516C	-0.0130168	0.952138
YDR520C	-0.0332004	0.921782
YDR524C	0.00268014	0.992467
YDR524C-B	0.0634235	0.806848
YDR529C	0.0689411	0.729737
YDR530C	0.0511113	0.864539
YDR532C	0.226844	0.572336
YDR533C	0.371848	0.165874
YDR534C	0.515598	0.222136
YDR535C	0.0373106	0.963612
YDR541C	0.104608	0.790324
YDL248W	-0.033062	0.860618
YDL244W	-0.149763	0.684852
YDL241W	-0.0543443	0.909825
YDL240W	0.238447	0.382937
YDL237W	-0.0683456	0.789428
YDL236W	-0.163995	0.479095
YDL233W	0.00520549	0.985701
YDL232W	0.334903	0.483866
YDL230W	0.232324	0.496027
YDL229W	-0.0353764	0.878322
YDL225W	-0.123538	0.606653
YDL219W	-0.227288	0.468512
YDL218W	-0.470841	0.570781
YDL212W	0.00713289	0.972575
YDL210W	0.1471	0.857086
YDL208W	-0.159998	0.432715
YDL207W	0.321426	0.294107
YDL206W	-0.0195598	0.954765
YDL204W	0.167598	0.513949
YDL202W	0.0845146	0.713212
YDL201W	-0.281159	0.286389
YDL195W	0.18547	0.292124
YDL194W	-0.130701	0.713458
YDL193W	-0.164481	0.521712
YDL192W	-0.0404083	0.837714
YDL191W	-0.26856	0.302333
YDL189W	0.295519	0.269106
YDL185W	-0.131993	0.491337
YDL182W	-0.177904	0.379235
YDL181W	0.0611034	0.820796
YDL180W	-0.0978806	0.758895
YDL179W	0.222034	0.350071
YDL178W	-0.154476	0.442022
YDL176W	0.0590069	0.841441
YDL173W	-0.0907911	0.662221
YDL170W	0.136772	0.617524
YDL168W	-0.277963	0.179313
YDL165W	-0.0935758	0.742277
YDL161W	0.148191	0.576305
YDL159W	-0.182431	0.535109
YDL156W	0.0823712	0.815399
YDL155W	0.00840504	0.974158
YDL154W	0.127225	0.726861
YDL150W	0.212607	0.379665
YDL149W	0.147328	0.638537
YDL147W	0.00209585	0.993286
YDL146W	0.0887922	0.825652
YDL143W	-0.0750704	0.689309
YDL141W	-0.0758643	0.749917
YDL138W	0.0273642	0.927939
YDL137W	0.0573095	0.769026
YDL136W	-0.256992	0.32536
YDL133W	0.292286	0.347098
YDL132W	0.117477	0.601893
YDL131W	-0.212357	0.294193
YDL130W-A	0.120834	0.637565
YDL130W	-0.137739	0.578583
YDL129W	-0.152974	0.830428
YDL128W	-0.0533337	0.798208
YDL127W	-0.301439	0.402208
YDL124W	0.012321	0.954683
YDL123W	0.0334549	0.928022
YDL122W	0.108262	0.650835
YDL120W	0.100573	0.686363
YDL117W	-0.00627083	0.978758
YDL116W	0.0437959	0.844709
YDL112W	-0.0759968	0.705862
YDL108W	0.217366	0.481955
YDL107W	0.132752	0.691724
YDL105W	0.109177	0.77004
YDL102W	-0.351557	0.136123
YDL099W	0.0594798	0.846011
YDL095W	0.0199124	0.913262
YDL093W	-0.126998	0.619799
YDL092W	-0.319626	0.227202
YDL089W	0.0844767	0.792357
YDL086W	0.0109461	0.959853
YDL085W	0.996958	0.23811
YDL084W	-0.0893037	0.631039
YDL082W	0.112283	0.622015
YDL075W	0.0259328	0.911654
YDL073W	0.310987	0.352239
YDL070W	0.147321	0.55358
YDL066W	0.096371	0.606213
YDL064W	-0.242446	0.37638
YDL060W	-0.0405191	0.84759
YDL058W	-0.135441	0.680585
YDL057W	0.0219098	0.952305
YDL056W	0.139417	0.63102
YDL051W	-0.19916	0.316476
YDL046W	-0.107047	0.655505
YDL045W-A	-0.0950202	0.734193
YDL031W	-0.119189	0.570709
YDL030W	0.0437747	0.896468
YDL029W	-0.147157	0.430576
YDL022W	0.11233	0.561141
YDL021W	0.213581	0.500905
YDL017W	-0.261656	0.421752
YDL014W	0.0481649	0.834479
YDL013W	0.232256	0.477003
YDL010W	0.123523	0.667282
YDL008W	-0.181423	0.562678
YDL007W	-0.114853	0.559777
YDL006W	-0.102241	0.777078
YDL004W	-0.128166	0.570031
YDL003W	0.0819656	0.773971
YDL001W	-0.0618613	0.833025
YDR002W	-0.0725917	0.698165
YDR003W-A	-0.141576	0.882649
YDR004W	-0.0260657	0.938113
YDR007W	0.105018	0.75948
YDR009W	-0.215536	0.620626
YDR011W	0.0972977	0.607934
YDR012W	-0.0310315	0.901714
YDR013W	0.0379583	0.908432
YDR014W	-0.0860526	0.822988
YDR021W	-0.184361	0.593078
YDR023W	-0.0775009	0.684157
YDR025W	-0.0125504	0.961302
YDR031W	0.0912285	0.765568
YDR033W	0.000304948	0.998768
YDR034W-B	-0.111312	0.794683
YDR035W	-0.0733196	0.716096
YDR037W	-0.0802313	0.676017
YDR041W	-0.0706236	0.764939
YDR044W	0.169356	0.573699
YDR047W	-0.0634946	0.768231
YDR049W	0.122393	0.639791
YDR055W	0.0132135	0.944957
YDR057W	0.0496151	0.885577
YDR060W	0.139423	0.537322
YDR061W	-0.056063	0.831982
YDR062W	0.0434186	0.822732
YDR063W	0.104719	0.71691
YDR064W	-0.0276322	0.91273
YDR065W	-0.100468	0.808958
YDR068W	-0.310366	0.646233
YDR073W	0.0395526	0.90135
YDR074W	0.0827645	0.641606
YDR075W	-0.027407	0.934676
YDR076W	-0.108804	0.78035
YDR077W	0.146945	0.595633
YDR079W	-0.110535	0.754517
YDR080W	0.0786059	0.776593
YDR082W	0.0641509	0.857655
YDR083W	-0.147386	0.617766
YDR089W	0.170975	0.474115
YDR092W	-0.220245	0.373496
YDR093W	0.107898	0.615836
YDR096W	0.206938	0.344876
YDR099W	-0.0416671	0.826276
YDR100W	-0.10925	0.679078
YDR103W	0.13602	0.562114
YDR106W	0.308202	0.66211
YDR108W	0.110616	0.705437
YDR110W	0.178733	0.618856
YDR115W	0.0768537	0.767558
YDR118W	0.0968272	0.778794
YDR119W	-0.239397	0.238132
YDR119W-A	0.449249	0.442373
YDR121W	-0.104181	0.742775
YDR122W	0.320093	0.13031
YDR124W	-0.339936	0.482815
YDR126W	0.0439424	0.916413
YDR127W	-0.085185	0.624091
YDR128W	0.0963552	0.708644
YDR137W	0.0776904	0.814081
YDR138W	0.0151451	0.953824
YDR140W	-0.171614	0.566162
YDR145W	0.233914	0.287167
YDR147W	-0.127668	0.637554
YDR150W	0.281227	0.626618
YDR152W	-0.0597821	0.802031
YDR158W	-0.01918	0.924717
YDR159W	0.0285227	0.927992
YDR160W	0.0659084	0.944259
YDR161W	-0.143135	0.538848
YDR163W	-0.0466509	0.891556
YDR165W	-0.185068	0.390302
YDR167W	0.39335	0.157643
YDR168W	-0.00736888	0.978793
YDR171W	0.18502	0.363476
YDR172W	0.00607473	0.974629
YDR174W	0.0635168	0.730905
YDR176W	0.358279	0.308355
YDR177W	-0.0707914	0.724116
YDR178W	-0.0786449	0.750787
YDR179W-A	-0.201168	0.570702
YDR180W	0.0226139	0.943225
YDR182W	-0.0583223	0.795257
YDR183W	-0.398114	0.250179
YDR188W	0.00673698	0.972468
YDR189W	-0.0173015	0.935019
YDR191W	0.0544858	0.874919
YDR195W	0.0553052	0.825617
YDR197W	-0.192543	0.539621
YDR201W	-0.102218	0.815525
YDR204W	-0.150321	0.608856
YDR205W	-0.0684777	0.798489
YDR206W	0.153244	0.541208
YDR208W	0.0345506	0.871076
YDR210W	0.164207	0.516053
YDR211W	0.0866561	0.658026
YDR212W	-0.189211	0.332661
YDR213W	0.0425309	0.863978
YDR214W	-0.122602	0.532353
YDR216W	0.0823371	0.66714
YDR221W	-0.0882737	0.716461
YDR222W	-0.404039	0.147739
YDR223W	0.235025	0.762325
YDR225W	0.0308216	0.8857
YDR226W	-0.0540511	0.777337
YDR227W	0.201215	0.527542
YDR229W	0.229074	0.442737
YDR232W	0.122333	0.546866
YDR234W	-0.157145	0.48896
YDR235W	-0.0108421	0.974212
YDR237W	-0.0643404	0.799817
YDR241W	0.06602	0.930259
YDR242W	0.287371	0.333597
YDR244W	-0.0887803	0.721414
YDR245W	-0.214973	0.322113
YDR246W	-0.116293	0.711116
YDR247W	0.398441	0.2201
YDR251W	0.131784	0.537016
YDR252W	0.194998	0.636171
YDR254W	0.0619831	0.87553
YDR262W	0.0294577	0.906015
YDR265W	-0.0312317	0.923299
YDR268W	-0.327748	0.268058
YDR270W	0.0483267	0.884505
YDR272W	-0.0759452	0.732567
YDR273W	0.361817	0.647331
YDR275W	0.0986133	0.806249
YDR279W	-0.0484882	0.889909
YDR280W	-0.221181	0.372481
YDR285W	0.107341	0.828309
YDR287W	-0.0354821	0.913814
YDR288W	0.176235	0.623489
YDR291W	0.233907	0.415023
YDR296W	-0.0261487	0.91336
YDR297W	-0.0313766	0.888814
YDR299W	-0.004937	0.983602
YDR301W	0.138711	0.560911
YDR302W	-0.00511168	0.985994
YDR307W	-0.118921	0.609861
YDR311W	0.261987	0.393168
YDR312W	-0.139497	0.576749
YDR316W	0.00748621	0.982872
YDR317W	-0.0385009	0.955465
YDR318W	0.173752	0.672924
YDR321W	-0.186593	0.391018
YDR322W	-0.00166562	0.993971
YDR325W	0.157086	0.589086
YDR330W	0.275714	0.280922
YDR331W	-0.176342	0.439961
YDR332W	0.0885383	0.782547
YDR334W	0.113955	0.763852
YDR335W	0.125544	0.544301
YDR336W	-0.10756	0.781898
YDR337W	0.112346	0.657479
YDR347W	-0.0855793	0.710537
YDR351W	0.167517	0.540189
YDR352W	-0.400943	0.135407
YDR353W	-0.0724088	0.720347
YDR354W	-0.0578933	0.792151
YDR356W	-0.0789088	0.819824
YDR358W	0.0482811	0.846637
YDR363W	0.235346	0.588976
YDR363W-A	0.185967	0.512002
YDR367W	-0.127445	0.621804
YDR368W	0.0532112	0.803076
YDR371W	-0.0134012	0.965386
YDR374W-A	-0.249411	0.588567
YDR376W	-0.129629	0.610184
YDR377W	-0.0061287	0.980099
YDR379W	0.288583	0.305488
YDR380W	-0.271231	0.242119
YDR381W	-0.0391572	0.837143
YDR382W	-0.0589719	0.791001
YDR385W	-0.110099	0.614303
YDR386W	0.0329473	0.922247
YDR388W	0.00131006	0.994627
YDR389W	0.192398	0.437606
YDR392W	-0.162344	0.652877
YDR393W	0.121802	0.708435
YDR394W	0.0340325	0.867285
YDR395W	-0.00329369	0.9853
YDR398W	-0.0433968	0.839186
YDR399W	0.0119233	0.955961
YDR401W	-0.234863	0.813446
YDR403W	0.15544	0.788001
YDR405W	-0.0822572	0.745899
YDR406W	0.155563	0.557813
YDR409W	0.243425	0.400884
YDR412W	-0.0839075	0.781204
YDR416W	0.0118006	0.968586
YDR418W	-0.142103	0.538167
YDR419W	-0.00541565	0.987021
YDR420W	0.416649	0.0299278
YDR421W	0.297831	0.323679
YDR425W	0.204286	0.54156
YDR427W	-0.202733	0.328681
YDR434W	-0.0657514	0.761124
YDR436W	0.0936098	0.720521
YDR438W	0.0108745	0.979049
YDR439W	0.253654	0.525038
YDR440W	0.172612	0.555138
YDR444W	0.0592021	0.837634
YDR448W	0.0227862	0.926405
YDR450W	-0.044202	0.849625
YDR452W	-0.0616462	0.799898
YDR456W	-0.136985	0.576482
YDR457W	0.131088	0.473197
YDR460W	-0.156531	0.642514
YDR462W	-0.198249	0.429256
YDR463W	0.0859916	0.683119
YDR464W	0.264903	0.405567
YDR466W	0.322141	0.240793
YDR469W	0.0322256	0.909492
YDR471W	-0.0289386	0.891305
YDR472W	0.177626	0.522059
YDR477W	-0.114341	0.566695
YDR478W	0.0633908	0.870771
YDR483W	-0.0594462	0.760236
YDR484W	0.0785091	0.801093
YDR489W	-0.0479547	0.880481
YDR492W	-0.0424649	0.867554
YDR493W	-0.307297	0.306905
YDR494W	0.0704487	0.786774
YDR499W	0.150081	0.691229
YDR501W	-0.275364	0.486809
YDR510W	-0.29179	0.210911
YDR511W	-0.278616	0.296
YDR513W	0.0409708	0.851163
YDR515W	-0.0910071	0.767131
YDR517W	0.124091	0.614351
YDR518W	-0.136179	0.606681
YDR519W	-0.24923	0.333873
YDR525W-A	-0.2087	0.382086
YDR527W	-0.00346449	0.990227
YDR528W	0.0883317	0.778974
YDR531W	-0.251986	0.31742
YDR536W	0.494734	0.435378
YDR538W	0.155182	0.603843
YDR539W	-0.20348	0.384074
YEL073C	0.0646724	0.837576
YEL068C	-0.367545	0.446282
YEL064C	-0.0120647	0.971663
YEL063C	0.0528932	0.812352
YEL061C	0.0134223	0.97115
YEL060C	0.0770842	0.721469
YEL059C-A	-0.115378	0.791057
YEL055C	-0.0581947	0.802208
YEL054C	-0.0627543	0.78339
YEL053C	0.140586	0.577735
YEL050C	-0.101325	0.659522
YEL048C	-0.353473	0.377204
YEL047C	0.0635992	0.78244
YEL046C	0.0778177	0.705295
YEL039C	-0.237465	0.420737
YEL037C	-0.0196498	0.926642
YEL036C	0.16732	0.411464
YEL029C	-0.261763	0.411852
YEL025C	0.108654	0.677591
YEL023C	0.270846	0.537009
YEL017C-A	0.33969	0.607852
YEL016C	-0.276591	0.373812
YEL009C	0.2628	0.155271
YEL005C	-0.243102	0.499138
YEL002C	-0.0577728	0.75931
YEL001C	-0.222426	0.309625
YER003C	-0.082399	0.692792
YER007C-A	0.0680699	0.781059
YER008C	0.11315	0.645847
YER010C	0.140896	0.620235
YER017C	0.00644296	0.973211
YER018C	0.263458	0.441903
YER019C-A	-0.148185	0.508914
YER026C	-0.274727	0.150767
YER027C	-0.0887943	0.693403
YER028C	0.00856181	0.986261
YER029C	-0.321125	0.326426
YER031C	0.0202784	0.92246
YER033C	0.397189	0.163741
YER036C	-0.129337	0.504158
YER038C	-0.161934	0.68952
YER039C	0.21869	0.748225
YER043C	-0.167091	0.505
YER044C	0.0985321	0.673557
YER044C-A	-0.598723	0.329028
YER045C	0.766621	0.0113828
YER047C	0.21016	0.407098
YER048C	0.174716	0.425616
YER050C	0.106519	0.674037
YER052C	-0.137676	0.461453
YER053C	0.199717	0.332596
YER053C-A	0.0266928	0.914161
YER054C	0.54155	0.112015
YER055C	-0.176404	0.365762
YER056C	-0.169044	0.365336
YER056C-A	-0.0733285	0.741166
YER057C	-0.0842274	0.718943
YER061C	0.131988	0.676129
YER062C	-0.120244	0.587206
YER064C	0.0253127	0.90416
YER065C	0.0666982	0.882243
YER071C	-0.101233	0.764558
YER075C	0.15013	0.57091
YER076C	-0.0640264	0.886128
YER077C	-0.0741674	0.742759
YER078C	-0.0766136	0.777708
YER082C	0.0246657	0.908727
YER083C	0.103796	0.637618
YER087C-B	0.0544503	0.83899
YER088C	0.210406	0.317516
YER088C-A	-0.1433	0.742424
YER089C	0.0279977	0.90208
YER091C	-0.137636	0.460715
YER093C	0.230552	0.423688
YER093C-A	0.166194	0.692734
YER094C	-0.150911	0.466244
YER099C	-0.139482	0.581644
YER101C	0.209834	0.463779
YER105C	0.164267	0.418599
YER107C	-0.020465	0.936349
YER109C	0.488784	0.105834
YER110C	-0.0462245	0.812784
YER111C	0.147967	0.654133
YER113C	0.033759	0.890797
YER114C	0.068939	0.751437
YER115C	0.289129	0.544698
YER116C	0.342029	0.289388
YER118C	0.0181613	0.935769
YER119C	0.104241	0.694272
YER122C	-0.0059923	0.975428
YER124C	0.0853931	0.683488
YER126C	-0.111434	0.605429
YER130C	0.173087	0.493591
YER132C	0.29421	0.258523
YER134C	-0.0264174	0.918267
YER137C	-0.00577667	0.990015
YER139C	-0.275814	0.378328
YER142C	-0.0269989	0.955707
YER144C	0.194801	0.395662
YER145C	0.151956	0.630066
YER147C	-0.171417	0.57605
YER149C	0.0202204	0.943783
YER151C	0.0738641	0.71632
YER152C	-0.0356852	0.897971
YER155C	0.255544	0.282841
YER156C	-0.100893	0.645636
YER158C	0.104178	0.767952
YER159C	0.338578	0.287711
YER161C	0.166747	0.58618
YER162C	0.330506	0.363435
YER163C	-0.133609	0.608449
YER168C	0.0830051	0.71304
YER172C	0.103026	0.645311
YER174C	-0.0549511	0.849265
YER175C	-0.080844	0.752962
YER180C	0.0852026	0.846127
YER180C-A	0.14306	0.770191
YER183C	-0.127431	0.677001
YER184C	0.193936	0.561195
YER186C	-0.0560606	0.871042
YER188C-A	0.25772	0.781175
YEL072W	-0.0528714	0.906121
YEL071W	-0.0192973	0.918925
YEL070W	0.284285	0.639823
YEL066W	0.183693	0.466278
YEL065W	0.000494581	0.999359
YEL062W	0.0324097	0.911123
YEL058W	-0.0547607	0.80631
YEL056W	-0.0675143	0.789387
YEL052W	-0.0273988	0.910544
YEL051W	-0.072136	0.740243
YEL049W	0.262287	0.650793
YEL044W	-0.00687122	0.98162
YEL043W	0.244158	0.284585
YEL042W	-0.0655984	0.774311
YEL041W	0.0945607	0.819718
YEL040W	-0.0762083	0.685324
YEL038W	-0.0857207	0.745848
YEL034W	-0.133041	0.587497
YEL033W	-0.365215	0.0996744
YEL032W	-0.183826	0.421125
YEL031W	-0.118653	0.572468
YEL030W	0.18389	0.554703
YEL028W	0.137187	0.835677
YEL027W	-0.065183	0.761949
YEL026W	-0.0653718	0.759787
YEL024W	0.0665515	0.757521
YEL022W	0.0666804	0.760697
YEL021W	0.00746973	0.974234
YEL020W-A	-0.0158874	0.942901
YEL018W	-0.0817953	0.821489
YEL017W	0.0325853	0.895542
YEL015W	-0.00853385	0.969755
YEL013W	-0.03285	0.870988
YEL012W	-0.00766972	0.981409
YEL011W	0.123498	0.662747
YEL007W	0.247479	0.331935
YEL006W	-0.00397063	0.988124
YEL004W	-0.0768625	0.841455
YEL003W	-0.196116	0.6198
YER001W	0.0461572	0.807332
YER002W	-0.0550924	0.868479
YER004W	0.144727	0.545211
YER005W	0.110147	0.688506
YER006W	-0.239492	0.231446
YER007W	-0.0200081	0.961861
YER009W	-0.144861	0.493731
YER011W	0.108107	0.83585
YER012W	-0.116889	0.581588
YER013W	-0.0492455	0.858555
YER014W	0.0182329	0.947095
YER015W	-0.0343131	0.91227
YER016W	-0.0786405	0.79386
YER019W	0.0357909	0.892673
YER020W	0.0257464	0.915549
YER021W	-0.0614282	0.736374
YER022W	0.14009	0.613306
YER023W	-0.187692	0.388946
YER024W	0.184734	0.52956
YER025W	-0.11311	0.573639
YER030W	0.058179	0.862713
YER032W	0.239409	0.314529
YER034W	0.118742	0.72916
YER035W	0.0753456	0.740968
YER037W	0.827186	0.169398
YER040W	0.131443	0.622671
YER041W	0.135379	0.665806
YER042W	0.039694	0.90185
YER046W	-0.14906	0.733472
YER048W-A	-0.138473	0.62157
YER049W	-0.00550636	0.976713
YER051W	-0.22283	0.565588
YER058W	-0.391256	0.339431
YER059W	0.249925	0.385066
YER060W	0.0239164	0.956417
YER060W-A	-0.236312	0.317008
YER063W	-0.0361517	0.888171
YER066W	0.0275619	0.953437
YER067W	-0.0739007	0.737114
YER068W	0.0977866	0.676334
YER069W	-0.162735	0.3971
YER070W	-0.0608755	0.743064
YER072W	-0.169123	0.468072
YER073W	0.00845891	0.965678
YER074W	-0.0614956	0.791154
YER074W-A	-0.28338	0.357698
YER079W	0.327358	0.308005
YER080W	0.0561047	0.78691
YER081W	-0.0874884	0.664939
YER086W	0.0849091	0.684491
YER087W	-0.0558204	0.848607
YER090W	-0.121285	0.521368
YER092W	-0.249557	0.362723
YER095W	-0.188969	0.400558
YER096W	-0.487125	0.486867
YER098W	0.516066	0.194306
YER100W	-0.00834853	0.972204
YER102W	-0.0732597	0.759925
YER103W	0.0116629	0.962011
YER104W	-0.0935818	0.807418
YER112W	-0.200059	0.49772
YER117W	-0.126418	0.60316
YER120W	-0.0110008	0.961247
YER121W	0.420305	0.492804
YER123W	0.0409552	0.884339
YER125W	0.128146	0.472442
YER127W	-0.150003	0.529773
YER128W	0.0727206	0.833347
YER129W	0.138436	0.637544
YER131W	-0.0325223	0.884895
YER133W	0.0390034	0.8536
YER136W	-0.0503997	0.798807
YER138W-A	-0.184012	0.476913
YER140W	-0.118371	0.738368
YER141W	0.026597	0.896075
YER143W	-0.0941332	0.695429
YER146W	0.133953	0.630167
YER148W	-0.0044318	0.984795
YER150W	0.124801	0.6888
YER154W	0.180391	0.420559
YER157W	0.0918024	0.735627
YER164W	0.202067	0.364792
YER165W	-0.00709144	0.970458
YER166W	0.153855	0.444669
YER167W	0.267193	0.243876
YER169W	0.158097	0.531502
YER170W	0.0776031	0.825422
YER171W	-0.0664296	0.774783
YER173W	0.121186	0.672692
YER176W	0.209948	0.426013
YER177W	0.0516813	0.814796
YER178W	-0.0118568	0.953895
YER182W	-0.311855	0.228898
YER188W	0.0441831	0.958594
YFL057C	0.180474	0.646046
YFL054C	0.181879	0.530043
YFL050C	0.218537	0.494008
YFL048C	-0.0327256	0.877848
YFL045C	-0.180357	0.36992
YFL044C	-0.165133	0.526126
YFL042C	0.219803	0.410728
YFL039C	-0.0339881	0.884108
YFL038C	-0.231685	0.232204
YFL034C-B	0.264274	0.330524
YFL034C-A	-0.189619	0.390833
YFL033C	0.379664	0.123997
YFL029C	0.209526	0.553529
YFL028C	-0.0446396	0.85337
YFL027C	0.0745464	0.839428
YFL025C	-0.0571389	0.81608
YFL024C	0.350995	0.224167
YFL022C	-0.0408781	0.836679
YFL020C	0.376394	0.535965
YFL018C	-0.185552	0.311989
YFL017C	0.0686548	0.796413
YFL016C	0.0434531	0.821566
YFL013C	0.170653	0.481958
YFL010C	0.0662604	0.751222
YFL002C	-0.0425243	0.847532
YFR003C	0.140952	0.572007
YFR005C	-0.0031383	0.990896
YFR011C	-0.0281301	0.919453
YFR014C	-0.0799937	0.760892
YFR015C	0.157585	0.486349
YFR016C	0.170843	0.57205
YFR017C	0.244079	0.389857
YFR018C	-0.0953401	0.739172
YFR024C-A	0.0791965	0.718595
YFR025C	0.127191	0.625354
YFR026C	-0.189313	0.761433
YFR028C	0.110689	0.618534
YFR031C	-0.0470996	0.890343
YFR031C-A	-0.122664	0.614847
YFR032C-A	0.0586763	0.816624
YFR033C	0.199012	0.367738
YFR034C	0.283858	0.259103
YFR037C	0.0841598	0.675752
YFR039C	-0.0607211	0.814087
YFR041C	-0.0222277	0.938713
YFR043C	-0.0753881	0.833638
YFR044C	-0.156217	0.454065
YFR046C	0.0309717	0.932745
YFR047C	-0.169813	0.503983
YFR050C	-0.0911976	0.637533
YFR051C	-0.084757	0.684841
YFR053C	-0.0386168	0.855044
YFL055W	0.209734	0.659901
YFL052W	0.313261	0.461104
YFL049W	0.226542	0.403477
YFL047W	-0.0380018	0.877351
YFL046W	-0.155764	0.623824
YFL041W	-0.0410244	0.876074
YFL037W	-0.00728576	0.969026
YFL036W	0.0170045	0.936343
YFL034W	0.0680335	0.809896
YFL031W	0.0633579	0.78759
YFL030W	0.053262	0.894774
YFL026W	0.142664	0.791415
YFL023W	0.067482	0.807695
YFL021W	0.18705	0.382581
YFL017W-A	-0.0159002	0.964938
YFL014W	-0.0834047	0.687709
YFL009W	-0.0211506	0.922632
YFL008W	0.056246	0.860197
YFL007W	-0.0227584	0.912479
YFL005W	-0.0734461	0.725214
YFL004W	0.0540981	0.812051
YFL001W	0.10024	0.729998
YFR001W	-0.0722107	0.84441
YFR002W	0.0659115	0.760247
YFR004W	-0.0236552	0.905677
YFR006W	-0.0660595	0.74177
YFR007W	0.0412542	0.901939
YFR008W	0.181991	0.536153
YFR009W	-0.00395633	0.983402
YFR010W	-0.060386	0.765096
YFR013W	-0.114545	0.621584
YFR019W	0.325268	0.210438
YFR020W	0.0170313	0.971025
YFR021W	-0.0405817	0.895563
YFR022W	0.179564	0.525137
YFR027W	0.0187959	0.967534
YFR029W	0.311028	0.296235
YFR030W	0.166351	0.444089
YFR034W-A	-0.786578	0.167273
YFR038W	0.0660006	0.796065
YFR040W	0.232162	0.364528
YFR042W	-0.2147	0.497133
YFR045W	-0.0962228	0.752094
YFR048W	0.143239	0.569152
YFR049W	-0.279262	0.340184
YFR052W	0.000226672	0.999063
YFR055W	-0.0461282	0.842223
YGL257C	-0.025386	0.928769
YGL252C	-0.0844768	0.699808
YGL251C	0.118782	0.706514
YGL246C	-0.264459	0.309247
YGL242C	-0.0153211	0.951684
YGL237C	0.0550286	0.854429
YGL236C	-0.0612316	0.813407
YGL231C	-0.102357	0.636516
YGL229C	0.0882957	0.832894
YGL226C-A	0.110421	0.702512
YGL224C	0.0144983	0.957791
YGL223C	0.0575609	0.821374
YGL222C	-0.0746726	0.737974
YGL221C	-0.0880194	0.709285
YGL219C	0.192455	0.39456
YGL213C	-0.164744	0.477031
YGL206C	0.0891337	0.636542
YGL204C	-0.215914	0.712714
YGL203C	-0.281644	0.201162
YGL201C	-0.0279687	0.898401
YGL200C	-0.046366	0.818907
YGL194C-A	0.472997	0.368043
YGL194C	-0.0577912	0.832527
YGL190C	-0.115471	0.66178
YGL189C	-0.063211	0.804741
YGL187C	0.0437169	0.842031
YGL186C	-0.183887	0.431941
YGL185C	-0.190267	0.533006
YGL184C	0.454689	0.378737
YGL179C	-0.139332	0.760848
YGL176C	0.19065	0.58809
YGL175C	0.490082	0.337189
YGL173C	0.00900858	0.958882
YGL167C	0.113762	0.548452
YGL164C	0.113751	0.762492
YGL163C	-0.00213867	0.99387
YGL161C	-0.221996	0.35764
YGL154C	-0.14776	0.735814
YGL150C	0.188822	0.437645
YGL147C	-0.268355	0.280802
YGL146C	-0.143785	0.817775
YGL144C	-0.0904971	0.820937
YGL143C	-0.165051	0.57632
YGL142C	-0.254189	0.388889
YGL140C	0.173787	0.421095
YGL136C	0.139232	0.687627
YGL131C	0.343241	0.299236
YGL129C	-0.130846	0.581595
YGL128C	0.282156	0.430137
YGL127C	0.18768	0.585082
YGL124C	0.0195167	0.951679
YGL122C	-0.0327119	0.884031
YGL121C	0.301605	0.324031
YGL120C	-0.0286862	0.894793
YGL112C	-0.0374104	0.876984
YGL110C	-0.283106	0.345453
YGL108C	0.434567	0.24799
YGL107C	-0.130297	0.57702
YGL104C	0.0786448	0.793077
YGL095C	0.101917	0.679125
YGL094C	0.186384	0.495376
YGL091C	-0.21381	0.436132
YGL087C	0.0762051	0.745704
YGL084C	0.0543399	0.80488
YGL078C	-0.0542997	0.791454
YGL077C	-0.0936587	0.626484
YGL076C	-0.170518	0.487239
YGL075C	-0.059573	0.899321
YGL072C	0.852932	0.394629
YGL070C	-0.151219	0.559757
YGL065C	-0.131574	0.605614
YGL064C	0.207713	0.445996
YGL061C	-0.0765238	0.820803
YGL057C	0.0163192	0.962091
YGL056C	0.0568022	0.791772
YGL054C	-0.202937	0.341525
YGL049C	0.144325	0.470553
YGL048C	-0.0328864	0.859241
YGL044C	-0.124814	0.669552
YGL040C	-0.0925947	0.664285
YGL038C	-0.130543	0.596638
YGL037C	0.014821	0.936548
YGL035C	0.150692	0.522613
YGL031C	-0.0338963	0.884009
YGL028C	0.128248	0.551485
YGL027C	0.0681157	0.777494
YGL026C	-0.0246019	0.900233
YGL025C	0.377927	0.159626
YGL023C	0.161699	0.491829
YGL020C	0.0522246	0.839604
YGL018C	0.0026483	0.993307
YGL013C	0.0927077	0.685591
YGL011C	-0.274143	0.199061
YGL009C	-0.0973938	0.648603
YGL008C	-0.0341238	0.865059
YGL005C	0.0954287	0.755436
YGL004C	-0.200494	0.55506
YGL003C	0.0482649	0.871531
YGL001C	-0.176565	0.399018
YGR001C	-0.0977805	0.679318
YGR002C	0.124507	0.600557
YGR005C	-0.0353307	0.902689
YGR008C	0.0430621	0.861988
YGR009C	0.0299031	0.894198
YGR015C	-0.137116	0.708513
YGR020C	0.047757	0.831087
YGR024C	-0.0777776	0.769598
YGR027C	-0.10094	0.672165
YGR030C	-0.283573	0.356425
YGR033C	0.0451702	0.870203
YGR036C	0.0667126	0.83274
YGR037C	-0.166304	0.492732
YGR043C	-0.338117	0.370895
YGR044C	0.015944	0.950178
YGR045C	0.217462	0.81422
YGR047C	-0.136618	0.574768
YGR050C	0.817204	0.275927
YGR053C	0.293661	0.639684
YGR057C	0.166051	0.679762
YGR061C	-0.0259332	0.883797
YGR062C	-0.113729	0.742109
YGR063C	-0.242976	0.384694
YGR065C	-0.215276	0.38208
YGR067C	0.576049	0.290971
YGR068C	-0.0372336	0.905938
YGR071C	0.339472	0.336728
YGR073C	0.142414	0.860469
YGR075C	-0.264024	0.473401
YGR076C	-0.284562	0.275099
YGR077C	0.27798	0.294219
YGR078C	-0.139262	0.592357
YGR081C	-0.0213374	0.932716
YGR083C	-0.0178675	0.926946
YGR084C	0.047973	0.820725
YGR085C	-0.0317496	0.888284
YGR086C	0.0812882	0.641046
YGR087C	-0.626073	0.591236
YGR095C	-0.0921822	0.730225
YGR098C	0.180725	0.529782
YGR102C	-0.00448087	0.988995
YGR104C	0.172534	0.562204
YGR106C	-0.0770237	0.707633
YGR109C	-0.0941489	0.751584
YGR117C	0.127237	0.638554
YGR119C	0.0213307	0.922011
YGR120C	-0.0439948	0.885905
YGR121C	-0.101052	0.744813
YGR122C-A	-0.00508585	0.988103
YGR123C	-0.249372	0.280678
YGR128C	0.0461158	0.827775
YGR130C	0.115793	0.593195
YGR132C	-0.159054	0.442415
YGR138C	0.274762	0.210031
YGR146C	0.0345727	0.913638
YGR147C	-0.173982	0.533542
YGR148C	0.00739131	0.97464
YGR150C	-0.0827983	0.789952
YGR154C	0.24075	0.520257
YGR158C	0.0789515	0.760684
YGR159C	-0.207576	0.331055
YGR161C	0.274854	0.199419
YGR168C	0.307564	0.373401
YGR169C	0.00842907	0.980826
YGR169C-A	0.272445	0.427355
YGR171C	0.180909	0.545052
YGR172C	-0.173903	0.433328
YGR174C	-0.363707	0.267145
YGR175C	-0.13957	0.497047
YGR177C	-0.179525	0.514493
YGR178C	0.034027	0.852621
YGR179C	0.14369	0.658384
YGR180C	-0.0438454	0.824904
YGR182C	0.0539113	0.86887
YGR183C	-0.100121	0.688951
YGR184C	0.0999441	0.635567
YGR185C	-0.230794	0.265323
YGR187C	-0.196949	0.384426
YGR188C	0.239703	0.615218
YGR189C	0.0650578	0.738818
YGR192C	-0.0445378	0.877677
YGR193C	0.11477	0.58048
YGR194C	0.0143718	0.955806
YGR196C	-0.010086	0.97458
YGR197C	-0.0923284	0.774458
YGR200C	-0.249788	0.216701
YGR201C	-0.374997	0.423589
YGR202C	0.0313928	0.889908
YGR207C	-0.129714	0.542981
YGR209C	-0.165746	0.435167
YGR210C	-0.0797647	0.719407
YGR213C	0.0176293	0.978063
YGR216C	-0.0989101	0.718691
YGR220C	-0.281119	0.211707
YGR221C	0.469846	0.223449
YGR223C	0.0171488	0.952186
YGR229C	-0.0394987	0.868858
YGR231C	0.00645632	0.975205
YGR233C	0.165583	0.560468
YGR235C	0.0382284	0.863448
YGR237C	0.0684836	0.804261
YGR238C	0.171627	0.62803
YGR239C	-0.0911803	0.750822
YGR240C	5.85084e-05	0.999758
YGR241C	0.1622	0.518565
YGR244C	-0.0876357	0.65881
YGR245C	-0.134615	0.51663
YGR246C	0.00566642	0.982986
YGR250C	0.174302	0.468074
YGR253C	-0.140466	0.473032
YGR255C	-0.0619346	0.800788
YGR257C	-0.0957968	0.743936
YGR258C	0.0326519	0.919591
YGR259C	0.000249784	0.999738
YGR261C	-0.160411	0.423889
YGR262C	0.127023	0.625537
YGR263C	0.0608705	0.880127
YGR264C	-0.136078	0.46196
YGR267C	-0.126499	0.551113
YGR268C	0.120064	0.681595
YGR271C-A	-0.082402	0.83277
YGR274C	0.0486305	0.870334
YGR276C	-0.0493706	0.849666
YGR277C	0.0983629	0.712766
YGR279C	0.0674886	0.726859
YGR280C	-0.24447	0.369178
YGR282C	0.0472949	0.80538
YGR283C	-0.00606013	0.984945
YGR284C	-0.14542	0.507385
YGR285C	-0.0190158	0.924609
YGR286C	-0.0355183	0.920428
YGR287C	-0.114417	0.756614
YGR289C	0.146159	0.676723
YGL256W	0.227107	0.26272
YGL255W	0.436159	0.531671
YGL254W	0.021454	0.948329
YGL253W	-0.135171	0.515215
YGL250W	-0.266208	0.491307
YGL248W	0.178462	0.565841
YGL247W	-0.282784	0.539043
YGL245W	-0.0914201	0.629739
YGL244W	0.00136886	0.995537
YGL243W	0.00521948	0.985434
YGL241W	0.0528052	0.830401
YGL240W	0.274192	0.60002
YGL238W	-0.0475441	0.79802
YGL234W	-0.149082	0.440042
YGL233W	0.17299	0.586013
YGL232W	0.236535	0.394801
YGL228W	-0.045287	0.82113
YGL227W	0.0815045	0.768752
YGL226W	0.154135	0.675452
YGL225W	-0.0598038	0.760861
YGL220W	0.175992	0.54859
YGL216W	0.136422	0.611329
YGL215W	0.196604	0.403803
YGL212W	0.318208	0.353016
YGL211W	-0.138399	0.57919
YGL210W	-0.0815965	0.775257
YGL209W	-0.0307844	0.915617
YGL208W	0.0648113	0.829396
YGL207W	0.0152008	0.934769
YGL205W	-0.0405418	0.954378
YGL202W	-0.0112982	0.955505
YGL198W	0.0280425	0.902362
YGL197W	0.197956	0.329473
YGL196W	-0.0653392	0.821383
YGL195W	-0.0182298	0.917566
YGL191W	-0.0753616	0.726281
YGL181W	0.0547574	0.81036
YGL180W	0.254385	0.417218
YGL178W	0.308465	0.180957
YGL174W	-0.0750417	0.835409
YGL172W	-0.044034	0.836685
YGL171W	-0.230313	0.294676
YGL169W	-0.250322	0.375162
YGL166W	-0.130149	0.70203
YGL162W	0.131347	0.741846
YGL160W	-0.0709242	0.794224
YGL159W	-0.00740325	0.980583
YGL157W	-0.271191	0.172923
YGL156W	-0.104726	0.676996
YGL155W	-0.0501072	0.858343
YGL153W	0.12302	0.708598
YGL151W	0.230961	0.28961
YGL148W	0.0144659	0.948642
YGL145W	-0.0392265	0.88236
YGL141W	-0.0926198	0.701516
YGL139W	-0.24847	0.288668
YGL137W	-0.17589	0.371546
YGL135W	-0.149164	0.530168
YGL134W	0.0769748	0.841874
YGL133W	0.00174801	0.995534
YGL130W	-0.0207112	0.934829
YGL125W	-0.112563	0.575602
YGL123W	-0.105822	0.647738
YGL119W	-0.241913	0.390211
YGL117W	0.0682502	0.796772
YGL116W	-0.21869	0.35182
YGL115W	-0.26536	0.21648
YGL114W	0.134197	0.581765
YGL113W	0.0157806	0.965862
YGL111W	0.09323	0.683827
YGL106W	0.123654	0.56096
YGL105W	-0.188255	0.394895
YGL103W	-0.0706392	0.778141
YGL101W	-0.413364	0.153782
YGL100W	-0.157481	0.513768
YGL099W	-0.192528	0.405945
YGL098W	-0.073473	0.821096
YGL097W	-0.112391	0.582508
YGL096W	0.545202	0.157572
YGL093W	0.0736369	0.805658
YGL092W	-0.0768819	0.679296
YGL090W	-0.0317168	0.932283
YGL088W	-0.223653	0.560025
YGL086W	-0.260572	0.679044
YGL085W	0.155802	0.688716
YGL083W	-0.0466028	0.866068
YGL082W	-0.0171463	0.945187
YGL081W	0.238893	0.542223
YGL080W	0.00698573	0.978788
YGL079W	0.058474	0.857561
YGL073W	0.390346	0.128527
YGL071W	0.351797	0.232868
YGL068W	-0.0838367	0.674841
YGL067W	-0.0516904	0.846663
YGL066W	0.332834	0.199145
YGL063W	0.117343	0.761739
YGL062W	-0.273894	0.629542
YGL060W	-0.120909	0.651001
YGL059W	-0.04473	0.891297
YGL058W	-0.089047	0.69601
YGL055W	-0.120943	0.517719
YGL050W	-0.0144594	0.966993
YGL047W	0.324572	0.334534
YGL045W	0.160851	0.581164
YGL043W	-0.119335	0.561039
YGL041W-A	-0.169404	0.541729
YGL039W	0.103584	0.754899
YGL036W	0.202629	0.409741
YGL030W	-0.200657	0.442095
YGL029W	-0.628673	0.152423
YGL022W	-0.0247913	0.91039
YGL021W	0.26141	0.218762
YGL019W	-0.0853003	0.738297
YGL017W	0.0573636	0.869062
YGL016W	-0.171964	0.481367
YGL014W	0.0912812	0.651945
YGL012W	-0.145267	0.471926
YGL010W	0.0437849	0.901407
YGL006W	0.0321546	0.891508
YGL002W	0.0219414	0.946158
YGR003W	-0.16992	0.511849
YGR004W	-0.246953	0.445552
YGR006W	0.244358	0.539164
YGR007W	-0.312358	0.215867
YGR012W	-0.248088	0.37358
YGR013W	0.194875	0.516953
YGR014W	0.115219	0.54792
YGR016W	-0.349077	0.451039
YGR017W	0.0545042	0.848393
YGR019W	-0.100287	0.654048
YGR021W	0.0842408	0.759297
YGR023W	0.319394	0.239455
YGR026W	-0.0482703	0.825182
YGR028W	-0.193674	0.460145
YGR029W	0.0836485	0.737079
YGR031W	-0.0457698	0.865675
[truncated: 3,292 more rows]
