# Supplementary material for: Decapping factor Dcp2 controls mRNA abundance and translation to adjust metabolism and filamentation to nutrient availability
Source: eLife journal article supplement (doi:10.7554/elife.85545), 2023-06-02
Supplement: fig1-data4 [file Figure 1 – source data 4.xlsx]

## Sheet: RNA-Seq mut vs WT
gene_ID	dcp2_mRNA	gene_ID	dhh1 mRNA	gene_ID	dcp2dhh1 vs WT			FDR < 0.1	gene_ID	dcp2_mRNA	dhh1 mRNA	dcp2dhh1 vs WT			Dhh1-dep 752	Dhh1-indep 607
YPL187W	10.9468	YJL153C	4.57783	YOR041C	-10.5523			FC > 1.4	YPL187W	10.9468	#N/A	10.9775			YFL014W	YPL014W
YKL178C	5.71682	YDL160C	-3.64293	YIL015W	-6.21078			mRNA up	YGL089C	4.54891	#N/A	4.52314			YKL178C	YGL081W
YFL014W	5.58853	YBR072W	5.45627	YFL026W	-4.7577			n=1376	YHL012W	2.67289	#N/A	2.68979			YLR327C	YLR054C
YOR178C	4.96367	YLR142W	2.5955	YEL017C-A	-4.42811				YLR311C	2.65767	#N/A	2.52264			YBL043W	YFL033C
YGL089C	4.54891	YLR194C	2.03561	YKL209C	-3.40835				YMR007W	2.63007	#N/A	2.90016			YOR178C	YGR023W
YGR248W	4.4372	YJR137C	-1.99905	YHR215W	-2.88568				YBR186W	2.61572	#N/A	1.8773			YGR259C	YNL036W
YGR259C	4.40027	YCR021C	4.5396	YAR071W	-2.81783				YDR024W	2.59872	#N/A	2.55784			YGR248W	YPR015C
YBL043W	4.3619	YOL155C	3.00787	YBR263W	-2.46391				YDL221W	2.5829	#N/A	1.4253			YHL024W	YNR040W
YPR160W	4.34846	YPR160W	4.28885	YNL160W	2.45482				YDL094C	2.54542	#N/A	2.34626			YCR021C	YOL086W-A
YLR327C	4.33611	YCR005C	2.23027	YHL024W	4.32222				YMR251W	2.15716	#N/A	1.78229			YPR160W	YOR023C
YHL024W	4.27609	YDR055W	1.94446	YER110C	-1.97583				YNL109W	1.97797	#N/A	1.78446			YGR224W	YLL060C
YCR021C	4.19703	YNL289W	1.88972	YDL061C	-2.32452				YGR064W	1.91129	#N/A	1.77552			YOL052C-A	YDL107W
YIL160C	4.08005	YGR032W	2.51451	YHR094C	-3.06907				YFL021C-A	1.76835	#N/A	1.65645			YGR243W	YDL244W
YKL217W	3.90505	YGL156W	2.77216	YOR120W	3.75616				YHL037C	1.56043	#N/A	1.05747			YKL217W	YLR417W
YBL048W	3.78148	YGL222C	2.53906	YOR202W	3.62497				YOR366W	1.53942	#N/A	1.19904			YIL160C	YCR095C
YIL101C	3.75714	YEL060C	1.90843	YER165W	-1.92239				YCR010C	1.48606	#N/A	1.9819			YOR120W	YHR161C
YPR007C	3.75494	YOL058W	-1.89626	YLR264W	-2.28107				YBR076W	1.36026	#N/A	1.2636			YIL101C	YPL144W
YOR120W	3.73298	YGL121C	3.72553	YMR291W	2.81841				YFL014W	5.58853	6.30701	5.01355			YBL048W	YCL034W
YJL161W	3.67634	YIL169C	2.9327	YGR032W	2.73879				YKL178C	5.71682	0.364592	5.52436			YPR007C	YKR009C
YOL052C-A	3.65917	YFR030W	-1.68594	YMR189W	2.50194				YLR327C	4.33611	4.86878	5.03042			YNR073C	YLR355C
YNR073C	3.57879	YHR209W	2.65532	YDR055W	1.83197				YBL043W	4.3619	3.39742	4.90094			YLR312C	YDR379W
YGR224W	3.55875	YKL163W	2.46733	YBR043C	2.59748				YOR178C	4.96367	4.43989	4.64887			YDR536W	YKL168C
YER054C	3.54387	YJL088W	-2.05549	YKL163W	2.31948				YGR259C	4.40027	2.49575	4.50639			YER054C	YFL049W
YBR033W	3.52921	YDR001C	1.84217	YLR325C	-1.69698				YGR248W	4.4372	4.52057	4.38238			YJL161W	YNL009W
YOR202W	3.51067	YER124C	1.29767	YBR011C	-1.70087				YHL024W	4.27609	2.71029	4.32222			YJR095W	YDR315C
YGL205W	3.45586	YPL110C	1.44382	YDR276C	-2.31803				YCR021C	4.19703	4.5396	4.29523			YDR018C	YIR005W
YDR018C	3.41802	YER069W	-1.52904	YOR374W	2.39927				YPR160W	4.34846	4.28885	4.08265			YGL205W	YOR354C
YIL099W	3.32972	YOL126C	1.946	YOL039W	-1.83495				YGR224W	3.55875	2.13772	3.99104			YFR053C	YCR066W
YLR312C	3.32717	YDR034W-B	4.45383	YDR216W	2.91228				YOL052C-A	3.65917	5.73911	3.93773			YEL070W	YMR155W
YHR087W	3.32563	YER053C-A	2.71738	YMR217W	-1.62441				YGR243W	2.77326	3.45303	3.92128			YHR087W	YMR293C
YEL070W	3.30798	YGR008C	3.10526	YJL080C	-1.5286				YKL217W	3.90505	2.01196	3.9142			YCL040W	YNL011C
YEL073C	3.24455	YLR414C	1.41239	YJL047C-A	-11.0481				YIL160C	4.08005	3.87215	3.77466			YBR072W	YOL117W
YOR100C	3.24194	YHR030C	1.26376	YLR354C	-1.67481				YOR120W	3.73298	3.21637	3.75616			YBR033W	YOL119C
YCL040W	3.21627	YGL028C	1.29272	YLR048W	-1.49882				YIL101C	3.75714	3.32023	3.71133			YOR100C	YGR223C
YLR031W	3.19276	YML128C	3.45172	YKL164C	1.71906				YBL048W	3.78148	4.11139	3.60391			YPL186C	YGL021W
YFR053C	3.19131	YKL096W	1.93753	YDR077W	1.85908				YPR007C	3.75494	1.37524	3.59141			YMR105C	YPL111W
YJR095W	3.15702	YDL234C	1.61294	YMR266W	-2.18707				YNR073C	3.57879	2.55715	3.58958			YJL116C	YGR045C
YMR105C	3.15307	YBR056W-A	2.63999	YKR059W	-1.43636				YLR312C	3.32717	2.21239	3.4779			YEL073C	YGL036W
YBR072W	3.13196	YFL014W	6.30701	YCL049C	2.56689				YDR536W	2.70353	3.48259	3.4463			YCR007C	YIR042C
YPL171C	3.06854	YKR091W	2.51955	YJL138C	-1.39072				YER054C	3.54387	2.69774	3.41415			YNR034W-A	YBR108W
YPL186C	3.06378	YLR179C	-1.48227	YDL066W	-1.72812				YJL161W	3.67634	3.19633	3.38013			YJR008W	YPL164C
YHL016C	3.0356	YPR030W	2.84352	YMR006C	-2.45587				YJR095W	3.15702	3.09634	3.29223			YJL106W	YML076C
YFL057C	3.02891	YPL088W	1.91682	YJL189W	-1.85468				YDR018C	3.41802	2.51864	3.28165			YHL016C	YJL005W
YJR008W	2.9944	YEL011W	3.20417	YCL018W	2.49536				YGL205W	3.45586	2.79499	3.27539			YDR216W	YOR292C
YGR043C	2.95624	YGR260W	-1.37605	YNL289W	2.04133				YFR053C	3.19131	2.69744	3.22572			YAL061W	YOR064C
YDR216W	2.95087	YIL043C	-1.28647	YCR036W	2.09209				YEL070W	3.30798	2.29191	3.21616			YLR031W	YJL147C
YCR007C	2.95064	YDR454C	-1.23707	YJL177W	-1.54794				YHR087W	3.32563	4.84085	3.17748			YFL052W	YPR127W
YMR250W	2.93217	YDL227C	-1.75454	YPR074C	-1.46314				YCL040W	3.21627	2.29923	3.17249			YPR030W	YHR119W
YNR034W-A	2.92855	YDL072C	1.46654	YER131W	-1.54078				YBR072W	3.13196	5.45627	3.17081			YMR291W	YIL120W
YPR030W	2.92746	YGR243W	3.45303	YOR293W	-1.56				YBR033W	3.52921	1.81371	3.13927			YGL121C	YKL219W
YNR002C	2.9099	YPL250C	1.95517	YKL056C	-1.79161				YOR100C	3.24194	1.9864	3.10896			YPL171C	YGL124C
YAL061W	2.90986	YBR054W	1.42973	YLR388W	-1.82142				YPL186C	3.06378	3.00652	3.09289			YEL011W	YCR086W
YFL052W	2.90729	YFL053W	5.01774	YFL014W	5.01355				YMR105C	3.15307	3.09327	3.08101			YML042W	YIR016W
YLR149C	2.9065	YMR096W	2.349	YBR106W	-1.61746				YJL116C	2.87559	0.688586	3.02039			YLR149C	YOR357C
YML128C	2.90585	YDR216W	2.56466	YHR193C	-1.52769				YEL073C	3.24455	0.916191	3.01718			YNR002C	YBR188C
YJR004C	2.89536	YDL215C	1.73286	YKL178C	5.52436				YCR007C	2.95064	0.851132	3.00794			YNL202W	YDL200C
YGR070W	2.89398	YLL039C	2.00265	YCR037C	2.11111				YNR034W-A	2.92855	5.03913	2.98423			YFR017C	YDL214C
YML042W	2.88246	YDL066W	-1.16794	YER087C-B	-2.10344				YJR008W	2.9944	2.29702	2.98339			YGR032W	YKR080W
YJL116C	2.87559	YEL039C	2.94793	YKL060C	-1.51472				YJL106W	2.8223	0.936993	2.97823			YIL099W	YCR024C
YGR032W	2.87394	YAL003W	-1.25373	YDL081C	-1.74966				YHL016C	3.0356	0.40667	2.91585			YGR043C	YDR131C
YJL106W	2.8223	YKL164C	1.59929	YLR179C	-1.95585				YDR216W	2.95087	2.56466	2.91228			YML054C	YDR319C
YEL011W	2.81578	YHR094C	-2.09752	YAL003W	-1.39343				YAL061W	2.90986	3.91621	2.89792			YML128C	YNL294C
YGL121C	2.80632	YMR250W	3.20586	YKL080W	-1.5452				YLR031W	3.19276	0.709502	2.8934			YMR196W	YIR025W
YCR089W	2.79098	YBR006W	1.82802	YLR029C	-1.56466				YFL052W	2.90729	0.88771	2.89109			YER121W	YPR199C
YMR196W	2.77426	YGL194C	1.4092	YOL126C	2.58637				YPR030W	2.92746	2.84352	2.84347			YMR250W	YIL130W
YGR243W	2.77326	YOL016C	1.43542	YMR250W	2.65951				YMR291W	2.50655	2.2264	2.81841			YGR070W	YJR127C
YGR088W	2.76627	YGR149W	1.65535	YPL019C	-1.39599				YGL121C	2.80632	3.72553	2.80475			YFR015C	YMR299C
YCR091W	2.75248	YNR001C	1.56075	YEL011W	2.7847				YPL171C	3.06854	1.80867	2.79898			YMR107W	YDR384C
YCL048W	2.74378	YAL062W	2.1309	YJL130C	-1.31003				YEL011W	2.81578	3.20417	2.7847			YJL153C	YBR077C
YFR015C	2.72416	YNL244C	-1.27603	YDR019C	2.19508				YML042W	2.88246	0.990922	2.77844			YOL126C	YHR159W
YBR298C	2.72326	YIL117C	1.28476	YDL229W	-1.19624				YLR149C	2.9065	2.97415	2.7684			YCR091W	YCR061W
YER121W	2.71749	YJL133C-A	1.99229	YDL171C	-1.62641				YNR002C	2.9099	2.40708	2.74295			YCL049C	YLR085C
YML054C	2.70929	YOL064C	-1.24286	YMR196W	2.67461				YNL202W	2.67541	1.40479	2.73975			YPR002W	YGL095C
YKR061W	2.70559	YHR087W	4.84085	YML106W	-1.58734				YFR017C	2.66494	2.31905	2.7395			YKR058W	YBR114W
YMR118C	2.70437	YJL159W	1.53204	YPR069C	-1.49569				YGR032W	2.87394	2.51451	2.73879			YGR292W	YOR244W
YDR536W	2.70353	YBR169C	1.95465	YPL187W	10.9775				YIL099W	3.32972	0.82679	2.73505			YPL017C	YDL230W
YKR097W	2.6775	YMR107W	5.45447	YDR086C	-1.88994				YGR043C	2.95624	3.2859	2.7264			YKR097W	YJR156C
YNL202W	2.67541	YDR077W	2.06174	YGR070W	2.65003				YML054C	2.70929	2.90809	2.72573			YGR088W	YJR059W
YHL012W	2.67289	YLR120C	1.10249	YKL180W	-1.41589				YML128C	2.90585	3.45172	2.70771			YML100W	YBR156C
YFR017C	2.66494	YJL177W	-0.986837	YOR178C	4.64887				YMR196W	2.77426	2.41276	2.67461			YMR189W	YBR237W
YGR292W	2.66188	YLR258W	2.24956	YCR005C	2.12573				YER121W	2.71749	2.52454	2.66597			YBR299W	YJL204C
YLR311C	2.65767	YOL052C-A	5.73911	YOL040C	-1.38465				YMR250W	2.93217	3.20586	2.65951			YKR061W	YKR101W
YHR022C	2.65363	YPL223C	4.33239	YNL209W	-1.15894				YGR070W	2.89398	0.772375	2.65003			YKL086W	YEL028W
YKR058W	2.65197	YJR152W	2.0669	YLR448W	-1.45176				YFR015C	2.72416	2.39676	2.63628			YMR090W	YHR180W
YDL021W	2.64835	YLR149C	2.97415	YLR150W	-1.42165				YMR107W	2.46094	5.45447	2.59431			YNL160W	YIR014W
YMR007W	2.63007	YBR011C	-1.04116	YGL123W	-1.33098				YJL153C	2.59978	4.57783	2.59345			YDR391C	YMR056C
YDR034W-B	2.61704	YDR309C	1.15816	YCR073C	2.31849				YOL126C	2.39805	1.946	2.58637			YEL039C	YCR027C
YBR186W	2.61572	YGL039W	-1.60425	YNL066W	-1.51179				YCR091W	2.75248	1.18736	2.57538			YIR039C	YLL025W
YML100W	2.61514	YKL024C	-1.21516	YML126C	-1.42815				YCL049C	2.51234	0.736075	2.56689			YDL021W	YGR046W
YER044C-A	2.60295	YBR071W	1.40546	YLR249W	-1.22823				YPR002W	2.52905	1.95193	2.55596			YOR374W	YHR067W
YJL153C	2.59978	YNR034W-A	5.03913	YEL054C	-1.34963				YKR058W	2.65197	0.838956	2.55585			YCL048W	YER184C
YDR024W	2.59872	YLR286C	1.0223	YBR048W	-1.39299				YGR292W	2.66188	1.28023	2.54805			YDR343C	YDR371W
YIR039C	2.59316	YMR006C	-1.42435	YHR042W	-1.53258				YPL017C	2.5382	0.770718	2.54733			YLR267W	YMR199W
YDL221W	2.5829	YBL098W	-1.69507	YJL190C	-1.41274				YKR097W	2.6775	0.581776	2.54028			YGL156W	YDR530C
YBR299W	2.57388	YPR184W	2.23162	YAL038W	-1.21396				YGR088W	2.76627	2.71157	2.52135			YDR342C	YFL055W
YKL071W	2.57284	YHL021C	2.65776	YLR342W-A	-5.50156				YML100W	2.61514	2.67257	2.50278			YDR242W	YMR020W
YDR343C	2.56782	YBR263W	-1.11164	YHL015W	-1.46809				YMR189W	2.31858	0.694401	2.50194			YKL026C	YHL023C
YOR348C	2.5642	YNL305C	1.44649	YNL067W	-1.38701				YBR299W	2.57388	1.21191	2.49061			YKL163W	YIL071C
YDR342C	2.55255	YPR002W	1.95193	YGR214W	-1.23989				YKR061W	2.70559	1.34184	2.4884			YCR073C	YJR106W
YDL094C	2.54542	YMR291W	2.2264	YLR043C	-1.5458				YKL086W	2.3883	3.01746	2.4868			YHR209W	YOR152C
YCL018W	2.54198	YBR183W	2.18933	YLR271W	-2.74646				YMR090W	2.4905	1.85484	2.48039			YER067W	YDR137W
YPL017C	2.5382	YGR043C	3.2859	YGR037C	-1.58891				YNL160W	2.27256	1.55277	2.45482			YMR180C	YNL104C
YPR002W	2.52905	YHR029C	-1.78202	YLR378C	-1.40176				YDR391C	2.48915	1.60978	2.45067			YIL136W	YMR201C
YKL188C	2.52175	YIL101C	3.32023	YCR106W	2.13248				YEL039C	2.06496	2.94793	2.43641			YNL117W	YJL108C
YLR040C	2.51785	YOR374W	2.48551	YHR216W	-1.54133				YIR039C	2.59316	1.10063	2.43322			YNL065W	YLR246W
YCL049C	2.51234	YDL130W-A	2.50525	YPL106C	-1.23072				YDL021W	2.64835	2.44978	2.42979			YMR081C	YKR078W
YNL117W	2.50764	YKL001C	-1.56902	YLL039C	1.6085				YOR374W	2.32958	2.48551	2.39927			YDR034W-B	YJR021C
YCR073C	2.50742	YGR210C	-1.29084	YDR524C-B	-1.57128				YCL048W	2.74378	0.968856	2.37622			YMR118C	YLR382C
YMR291W	2.50655	YGR248W	4.52057	YGR243W	3.92128				YDR343C	2.56782	2.42406	2.37193			YOR348C	YDR196C
YMR081C	2.49413	YCR098C	2.36461	YDR385W	-1.13865				YLR267W	2.46083	2.48131	2.36885			YDR019C	YDL087C
YMR090W	2.4905	YML054C	2.90809	YOR133W	-1.13988				YGL156W	2.41211	2.77216	2.36329			YHR022C	YCR054C
YDR391C	2.48915	YLR300W	0.867291	YLR110C	-1.29998				YDR342C	2.55255	2.45442	2.3624			YIR031C	YCL051W
YMR107W	2.46094	YNR060W	-2.6558	YBR084W	-1.24071				YDR242W	2.45795	1.68497	2.32888			YGR052W	YDR499W
YLR267W	2.46083	YOR303W	-1.37911	YNL302C	-1.16161				YKL026C	2.38658	1.57746	2.32097			YNL014W	YLR451W
YDR242W	2.45795	YER165W	-1.06356	YDR391C	2.45067				YKL163W	2.01806	2.46733	2.31948			YER053C	YJR100C
YCR014C	2.45048	YBL043W	3.39742	YJR004C	2.78792				YCR073C	2.50742	0.714974	2.31849			YDL169C	YLR454W
YCR020C	2.4461	YDR525W-A	1.29922	YDR226W	-1.35453				YHR209W	2.40311	2.65532	2.31158			YPL230W	YCR076C
YBR043C	2.44581	YPR036W-A	1.46535	YEL034W	-1.36432				YER067W	2.25448	3.40615	2.27689			YOR289W	YLR010C
YFL020C	2.42766	YMR170C	1.90577	YBL092W	-1.33169				YMR180C	2.26054	0.756311	2.27671			YOR062C	YGL059W
YGL156W	2.41211	YMR169C	2.58725	YGR060W	-1.43761				YIL136W	2.39553	2.56704	2.27372			YJR155W	YCR046C
YCR106W	2.4079	YDR391C	1.60978	YLR340W	-1.20588				YNL117W	2.50764	2.9634	2.26994			YCR005C	YDR357C
YHR209W	2.40311	YMR062C	-1.19045	YCL035C	1.49258				YNL065W	1.62107	1.29318	2.26383			YFL020C	YOR383C
YOL126C	2.39805	YNL277W	-1.68685	YHR209W	2.31158				YMR081C	2.49413	2.44643	2.25668			YCR015C	YDR350C
YIL136W	2.39553	YJR010W	-1.52287	YHR021C	-1.28968				YDR034W-B	2.61704	4.45383	2.24844			YNL274C	YMR164C
YOR062C	2.39285	YOR289W	2.69424	YKL043W	-2.46547				YMR118C	2.70437	3.77444	2.2475			YKL161C	YMR167W
YKL086W	2.3883	YCL009C	-1.08336	YLR413W	-1.64027				YOR348C	2.5642	1.88712	2.21529			YCR036W	YDL020C
YKL026C	2.38658	YJR008W	2.29702	YNL111C	-1.40378				YDR019C	2.00712	1.21652	2.19508			YLR258W	YMR253C
YGR052W	2.38419	YGL248W	1.34072	YKL096W	1.3394				YHR022C	2.65363	1.72413	2.19192			YBL064C	YML068W
YCR107W	2.36505	YLR327C	4.86878	YJR008W	2.98339				YIR031C	2.22021	0.322859	2.18466			YMR169C	YOR328W
YMR065W	2.36355	YNL015W	1.4898	YNL178W	-1.11163				YGR052W	2.38419	1.48392	2.1666			YNL289W	YCR038C
YJR155W	2.35931	YJL161W	3.19633	YOL120C	-1.33051				YNL014W	2.35227	0.77467	2.15862			YKR091W	YGL131C
YNL014W	2.35227	YHL024W	2.71029	YLL045C	-1.19744				YER053C	2.16576	1.97257	2.1501			YKL071W	YPR111W
YOR009W	2.34746	YLR092W	-2.05422	YMR241W	-1.46763				YDL169C	2.10984	2.52608	2.14784			YMR085W	YOR005C
YDL243C	2.34594	YJR073C	1.45681	YCR089W	2.56729				YPL230W	2.27823	2.70303	2.14563			YDL204W	YIL066C
YOR374W	2.32958	YPL026C	1.1213	YKL161C	2.09222				YOR289W	2.20006	2.69424	2.14196			YBR019C	YCL016C
YMR189W	2.31858	YML126C	-0.979493	YFL031W	-1.4755				YOR062C	2.39285	1.35274	2.14006			YOR173W	YJR136C
YKL220C	2.30328	YKL056C	-0.994694	YPL111W	1.36308				YJR155W	2.35931	0.950779	2.1373			YMR206W	YPL177C
YLR258W	2.28799	YDR158W	-0.948264	YOL155C	1.58308				YCR005C	2.04266	2.23027	2.12573			YLR178C	YAL027W
YLR010C	2.28422	YMR219W	0.961492	YNL301C	-1.11098				YFL020C	2.42766	0.867736	2.12035			YMR017W	YKR027W
YCR037C	2.28416	YBR106W	-0.970244	YHR020W	-1.25029				YCR015C	2.14523	0.351442	2.10825			YML050W	YAL037W
YPL230W	2.27823	YPR069C	-0.838253	YFL045C	-1.2191				YNL274C	2.17281	2.36503	2.09851			YHL021C	YDR406W
YNL160W	2.27256	YGL215W	-1.49082	YLR432W	-1.13476				YKL161C	2.23051	1.11502	2.09222			YGR067C	YGR222W
YMR175W	2.26207	YFL045C	-0.801574	YBR025C	-1.1465				YCR036W	2.09279	0.562109	2.09209			YDR171W	YOR127W
YMR180C	2.26054	YPL143W	-0.823124	YMR230W	-1.20041				YLR258W	2.28799	2.24956	2.08998			YDL215C	YLR453C
YMR085W	2.25545	YPR074C	-1.18838	YGR034W	-1.20446				YBL064C	2.08252	1.65644	2.08385			YNR068C	YFR007W
YER067W	2.25448	YML091C	1.09602	YLR180W	-1.3288				YMR169C	2.25264	2.58725	2.0753			YMR103C	YLR245C
YMR169C	2.25264	YJL155C	1.39846	YPL250C	1.74288				YNL289W	1.72432	1.88972	2.04133			YDL085W	YDR268W
YOR173W	2.25016	YNL274C	2.36503	YHR087W	3.17748				YKR091W	2.15474	2.51955	2.03376			YJR154W	YER044C-A
YKL161C	2.23051	YDR461W	1.20634	YDR382W	-1.44224				YKL071W	2.57284	0.63695	2.01711			YOR019W	YJL107C
YDL204W	2.2299	YMR241W	-0.956566	YNL065W	2.26383				YMR085W	2.25545	1.99013	2.00006			YIL169C	YCR032W
YGR289C	2.22565	YGR213C	2.50049	YOR095C	-1.82865				YDL204W	2.2299	3.11631	1.98911			YPL088W	YDR005C
YBR018C	2.22539	YIL052C	-0.944229	YHR128W	-1.16478				YBR019C	1.78221	0.796871	1.98276			YHR033W	YBL019W
YIR031C	2.22021	YML106W	-0.927895	YDL215C	1.92865				YOR173W	2.25016	2.8155	1.9733			YJL199C	YGL146C
YOR289W	2.20006	YJR025C	-1.2297	YGR192C	-1.07516				YMR206W	2.08895	2.64596	1.97196			YFL030W	YDR130C
YNL093W	2.19468	YPR167C	-1.53186	YEL042W	-1.25359				YLR178C	2.18482	2.79948	1.96237			YDR077W	YER039C
YER150W	2.18881	YOR317W	1.161	YKL127W	-1.44182				YMR017W	2.06903	1.35544	1.95412			YOR273C	YCR037C
YLR178C	2.18482	YGL123W	-0.84082	YDR258C	1.81853				YML050W	1.96458	0.840213	1.94935			YBR183W	YKL187C
YGR213C	2.18397	YPR132W	-0.778552	YDL082W	-1.18619				YHL021C	1.81268	2.65776	1.94101			YOL157C	YNL172W
YNL274C	2.17281	YER053C	1.97257	YMR215W	-1.44035				YGR067C	2.01162	0.911773	1.94056			YIR029W	YMR302C
YFL030W	2.16779	YBR048W	-0.809035	YNL244C	-1.34105				YDR171W	1.90175	1.90306	1.9302			YDR055W	YJR108W
YER053C	2.16576	YIR030C	-2.2117	YGR162W	-1.19725				YDL215C	1.98987	1.73286	1.92865			YDR258C	YDR124W
YIL066C	2.16404	YDR059C	1.68807	YLR040C	2.45643				YNR068C	1.94522	0.27627	1.92797			YNL093W	YPL066W
YMR251W	2.15716	YOL140W	-1.37958	YIL101C	3.71133				YMR103C	2.02143	1.37478	1.92761			YNL144C	YNL083W
YPL148C	2.15504	YMR315W	1.54421	YDL130W	-1.20602				YDL085W	2.05677	3.11109	1.92631			YLR152C	YPL241C
YKR091W	2.15474	YGR088W	2.71157	YDL083C	-1.14639				YJR154W	1.95624	0.795724	1.92019			YBR169C	YIL152W
YCR015C	2.14523	YAL053W	0.977411	YNL069C	-1.16325				YOR019W	1.84863	0.395357	1.91726			YBR147W	YDR314C
YGL193C	2.14502	YBR295W	1.24188	YFL039C	-1.05334				YIL169C	1.57088	2.9327	1.90601			YER103W	YFL057C
YNR058W	2.12018	YDR247W	1.57777	YLR258W	2.08998				YPL088W	1.69409	1.91682	1.88841			YNR058W	YPL148C
YDR082W	2.12015	YOR208W	1.172	YEL026W	-1.67802				YHR033W	2.02445	0.991479	1.87677			YCR098C	YCR019W
YJL110C	2.11481	YNR016C	-0.762314	YOR099W	-1.29876				YJL199C	1.67465	0.702682	1.87526			YIL013C	YCR073W-A
YGR154C	2.11138	YER148W	-1.01797	YPL131W	-1.15259				YFL030W	2.16779	0.989624	1.86299			YGR213C	YIL116W
YDL169C	2.10984	YLR180W	-0.933956	YDR450W	-1.14959				YDR077W	1.80451	2.06174	1.85908			YEL041W	YOR365C
YDR403W	2.09467	YLR061W	-0.83106	YPL226W	-1.1109				YOR273C	1.85511	1.77284	1.85337			YMR271C	YGL073W
YOR128C	2.09413	YDL130W	-0.773235	YGR161C	1.70698				YBR183W	2.07102	2.18933	1.8505			YDL199C	YKR075C
YIR028W	2.09316	YHR042W	-1.17927	YOR335C	-1.02273				YOL157C	2.02945	0.552412	1.84987			YPR184W	YLR360W
YCR036W	2.09279	YLL026W	1.82704	YMR242C	-1.12352				YIR029W	1.92051	0.548906	1.83282			YFL054C	YAL063C
YCL004W	2.09271	YIL050W	1.38178	YDR454C	-1.30872				YDR055W	1.79681	1.94446	1.83197			YMR114C	YCL031C
YMR206W	2.08895	YMR196W	2.41276	YGL189C	-1.04604				YDR258C	1.6606	1.2648	1.81853			YDR058C	YOR350C
YBL064C	2.08252	YPL252C	-1.17618	YPL088W	1.88841				YNL093W	2.19468	2.70256	1.81669			YPL250C	YDR236C
YBR183W	2.07102	YLR446W	1.62091	YOR007C	-1.26023				YNL144C	1.89581	0.794928	1.81666			YER150W	YKR021W
YMR017W	2.06903	YCL064C	1.1762	YDL124W	1.4539				YLR152C	1.85305	0.346114	1.81441			YBR284W	YKR029C
YLL060C	2.06888	YLR267W	2.48131	YMR205C	-1.09286				YBR169C	1.87351	1.95465	1.81285			YOR208W	YER116C
YDL244W	2.06594	YGR138C	1.67322	YBR298C	2.73183				YBR147W	1.74071	1.27227	1.8075			YLR174W	YBR184W
YEL039C	2.06496	YOR167C	-0.759729	YJL121C	-1.62855				YER103W	1.85835	2.22254	1.80734			YKL164C	YOL148C
YDL085W	2.05677	YMR186W	-0.789385	YGL215W	-1.50891				YNR058W	2.12018	0.348332	1.79775			YCL039W	YCR067C
YCR005C	2.04266	YNL192W	0.988122	YOR369C	-1.17556				YCR098C	1.88437	2.36461	1.79367			YAL028W	YOL023W
YKL107W	2.0342	YOR071C	-1.42988	YDR418W	-1.08532				YIL013C	1.85767	0.315705	1.7893			YGR161C	YJR035W
YOL157C	2.02945	YDL222C	2.48771	YJR137C	-1.34089				YGR213C	2.18397	2.50049	1.78903			YPR026W	YER179W
YHR033W	2.02445	YDR382W	-0.72953	YLR293C	-1.13495				YEL041W	1.83576	0.529747	1.78385			YBR018C	YIR023W
YMR103C	2.02143	YLR225C	1.26494	YGL076C	-1.09977				YMR271C	1.84441	1.53799	1.76212			YLL057C	YIR034C
YKL163W	2.01806	YER103W	2.22254	YIR031C	2.18466				YDL199C	1.66559	1.91113	1.7606			YKL221W	YDR125C
YGR067C	2.01162	YDL171C	-1.497	YPL143W	-1.13898				YPR184W	1.88792	2.23162	1.75761			YPR005C	YOR180C
YDR019C	2.00712	YGR034W	-0.844875	YML063W	-0.998805				YFL054C	1.85121	0.398381	1.749			YHR137W	YOR319W
YKL221W	2.00073	YDR242W	1.68497	YIL053W	-1.4877				YMR114C	1.6669	0.415068	1.74899			YML118W	YPL269W
YDL215C	1.98987	YOR185C	1.87395	YPL037C	-1.28507				YDR058C	1.64595	1.66484	1.74464			YDR277C	YNL329C
YNL109W	1.97797	YER024W	1.70506	YIL069C	-1.17612				YPL250C	1.58628	1.95517	1.74288			YDR380W	YMR137C
YML050W	1.96458	YGR282C	0.736908	YGL253W	-1.11478				YER150W	2.18881	2.37137	1.73785			YER024W	YBR020W
YOR208W	1.96442	YOR298C-A	1.30921	YCR026C	1.40057				YBR284W	1.90496	0.813268	1.73267			YPL092W	YDR147W
YJR154W	1.95624	YOR336W	-1.04211	YNL190W	-1.38828				YOR208W	1.96442	1.172	1.72311			YPR001W	YMR097C
YML118W	1.94975	YOR096W	-0.845957	YGL204C	-4.23588				YLR174W	1.86326	0.761027	1.71948			YLL039C	YPL024W
YNR068C	1.94522	YNL327W	0.754832	YJL159W	1.27049				YKL164C	1.10033	1.59929	1.71906			YJR073C	YCR017C
YPR005C	1.93494	YLR390W-A	0.829671	YNL087W	-1.35808				YCL039W	1.79861	0.386016	1.71618			YLR151C	YMR066W
YHR211W	1.92884	YPL163C	0.89623	YBR084C-A	-1.13				YAL028W	1.76128	0.600952	1.70881			YLR346C	YGR270W
YIR029W	1.92051	YGL135W	-0.797821	YBL064C	2.08385				YGR161C	1.88907	1.46368	1.70698			YDR059C	YOL003C
YOR328W	1.91956	YHR068W	-0.77163	YML074C	-1.18873				YPR026W	1.76693	0.796385	1.70498			YIL029C	YDR227W
YGR064W	1.91129	YBR285W	3.38018	YER060W	-2.63663				YBR018C	2.22539	0.845322	1.70481			YOL155C	YJR153W
YJR156C	1.90633	YGR286C	-1.17283	YHR174W	-1.36549				YLL057C	1.66969	1.68721	1.70351			YHL036W	YIR032C
YBR284W	1.90496	YDL124W	1.32049	YDL191W	-1.09772				YKL221W	2.00073	1.19699	1.69999			YHR157W	YOL011W
YDR171W	1.90175	YJL121C	-0.807634	YOR063W	-1.14857				YPR005C	1.93494	1.82094	1.69664			YHL042W	YLR288C
YNL144C	1.89581	YJL130C	-1.10177	YLR287C-A	-1.39078				YHR137W	1.63244	1.07453	1.6925			YCR003W	YGL247W
YGR161C	1.88907	YOR161C	1.8076	YJR123W	-1.03686				YML118W	1.94975	0.682505	1.68918			YMR052W	YOR363C
YPR184W	1.88792	YNL160W	1.55277	YCL061C	1.44083				YDR277C	1.58515	1.31261	1.68673			YOR380W	YBR278W
YCR098C	1.88437	YKR077W	1.09536	YLR262C-A	-1.74509				YDR380W	1.73534	1.34816	1.66786			YKL133C	YDL173W
YCL010C	1.88389	YHR163W	-1.08454	YML028W	-1.21038				YER024W	1.62366	1.70506	1.65411			YGR008C	YDL077C
YJL216C	1.87824	YBL078C	1.89531	YER072W	-1.21122				YPL092W	1.51652	1.04075	1.62539			YIL155C	YOR162C
YLR318W	1.87522	YMR008C	0.862339	YBR189W	-1.03195				YPR001W	1.80005	1.56115	1.60885			YDR009W	YPL274W
YBR169C	1.87351	YDR074W	1.49131	YMR116C	-1.12558				YLL039C	1.63358	2.00265	1.6085			YJR130C	YJR135C
YLR174W	1.86326	YER077C	0.986337	YCR091W	2.57538				YJR073C	1.5675	1.45681	1.60743			YLR173W	YHR106W
YDR007W	1.86117	YKL185W	1.01558	YGL135W	-1.20028				YLR151C	1.72326	1.45947	1.60424			YIL073C	YMR278W
YER103W	1.85835	YKL068W-A	1.21654	YHR010W	-1.1024				YLR346C	1.35149	1.81127	1.60274			YBL075C	YOR031W
YIL013C	1.85767	YML117W	0.802108	YMR246W	-1.23393				YDR059C	1.37549	1.68807	1.58713			YIL162W	YLR306W
YOR273C	1.85511	YLL045C	-0.762262	YIR039C	2.43322				YIL029C	1.79676	0.515703	1.58488			YGL037C	YHL035C
YLR152C	1.85305	YJL190C	-0.795248	YGR118W	-0.999396				YOL155C	1.21975	3.00787	1.58308			YDR001C	YDR293C
YIR042C	1.85183	YDL085W	3.11109	YNL079C	-1.18557				YHL036W	1.62319	1.08908	1.58237			YCR075C	YKL220C
YFL054C	1.85121	YER086W	-1.04899	YIL133C	-1.04986				YHR157W	1.06898	0.263153	1.57381			YGR256W	YER159C
YOR019W	1.84863	YER091C	-1.13264	YMR142C	-1.13361				YHL042W	1.37039	0.636418	1.56451			YCL038C	YML005W
YMR271C	1.84441	YGR108W	1.08492	YGL031C	-1.06016				YCR003W	1.4624	0.65537	1.5635			YOL159C	YDR490C
YOL164W	1.84433	YLR303W	-1.05812	YIL162W	1.51785				YMR052W	1.54012	0.680738	1.56183			YDL022W	YOL112W
YEL041W	1.83576	YPL079W	-0.759665	YER053C	2.1501				YOR380W	1.68351	0.265977	1.56056			YGR194C	YOR030W
YDR406W	1.8312	YLR121C	1.06405	YLR061W	-1.17942				YKL133C	1.46702	1.24665	1.55851			YOR177C	YCL052C
YFL050C	1.8267	YMR280C	2.18675	YLR304C	1.17962				YGR008C	1.47562	3.10526	1.54781			YCL035C	YLL063C
YER184C	1.81791	YDR448W	1.05143	YJL110C	2.09279				YIL155C	1.5757	1.10347	1.53562			YNL046W	YNL125C
YHL021C	1.81268	YGR247W	1.19278	YDL184C	-3.90318				YDR009W	1.66312	0.99343	1.53392			YAL054C	YOL100W
YNR069C	1.80892	YGL245W	-0.809842	YPR102C	-1.01984				YJR130C	1.51261	0.318514	1.5333			YCL032W	YBR004C
YDR077W	1.80451	YDR428C	-1.37654	YLR075W	-1.11409				YLR173W	1.59615	0.513427	1.52391			YLR168C	YPL007C
YCR068W	1.80331	YER150W	2.37137	YKR091W	2.03376				YIL073C	1.57233	0.548275	1.52333			YPL113C	YDR126W
YPR001W	1.80005	YMR238W	0.856538	YFL037W	-1.05118				YBL075C	1.6676	0.425368	1.52194			YDR379C-A	YDR403W
YCL039W	1.79861	YCR051W	-0.931148	YOL086C	-1.15658				YIL162W	1.10285	1.13981	1.51785			YMR170C	YOR059C
YDR055W	1.79681	YGL030W	-0.721525	YCL039W	1.71618				YGL037C	1.65411	1.85712	1.51721			YJL132W	YDR263C
YIL029C	1.79676	YER028C	-2.33403	YBR169C	1.81285				YDR001C	1.59726	1.84217	1.51708			YDL079C	YCR089W
YBR019C	1.78221	YER062C	1.44607	YGL156W	2.36329				YCR075C	1.57307	0.284201	1.516			YDL124W	YDR421W
YBR270C	1.77606	YAR035W	1.98206	YKR061W	2.4884				YGR256W	1.75942	1.56197	1.51462			YDR119W-A	YCR068W
YPL223C	1.77264	YLR150W	-0.831978	YOL052C-A	3.93773				YCL038C	1.67327	1.08575	1.51271			YPL134C	YNL314W
YFL021C-A	1.76835	YPR005C	1.82094	YML054C	2.72573				YOL159C	1.68518	0.983038	1.50845			YJL144W	YDR223W
YPR026W	1.76693	YKR042W	-0.711436	YLR208W	-1.14954				YDL022W	1.46487	1.20516	1.50293			YNL279W	YOR219C
YPL113C	1.76617	YOR385W	1.39676	YCR011C	1.12333				YGR194C	1.46946	1.37211	1.49466			YGL222C	YLR376C
YGR168C	1.76499	YPR009W	-1.39183	YPL160W	-1.00189				YOR177C	1.44804	1.06271	1.49315			YOL048C	YER173W
YAL028W	1.76128	YPL220W	-0.762795	YER019C-A	-1.62209				YCL035C	1.37053	1.38624	1.49258			YKL051W	YJR062C
YGR256W	1.75942	YGL148W	-0.831143	YKL004W	-1.67387				YNL046W	1.4493	0.641206	1.49052			YIL028W	YLR313C
YJL132W	1.75542	YDL198C	-0.825437	YMR090W	2.48039				YAL054C	1.57042	1.21173	1.4839			YKL150W	YGR168C
YLR165C	1.74806	YLR244C	-0.775672	YOL052C	-1.46736				YCL032W	1.33036	0.357432	1.48177			YGR149W	YOR026W
YLR263W	1.74511	YPR118W	-0.825054	YPL249C-A	-1.22092				YLR168C	1.23622	0.833312	1.48016			YBR105C	YCL024W
YER039C	1.7429	YBR189W	-0.745853	YPR132W	-1.02946				YPL113C	1.76617	0.980064	1.477			YDR074W	YJL210W
YCR076C	1.7422	YGL032C	1.07068	YER036C	-1.02652				YDR379C-A	1.35384	1.79901	1.46413			YCL012C	YBR098W
YBR147W	1.74071	YJL144W	2.25912	YBL072C	-1.07411				YMR170C	1.63586	1.90577	1.46048			YCR026C	YGR154C
YAL063C	1.74038	YGL147C	-0.705793	YDR074W	1.40437				YJL132W	1.75542	0.539014	1.45706			YLR142W	YMR156C
YKL187C	1.73971	YLR214W	-1.43385	YMR180C	2.27671				YDL079C	1.54581	0.957197	1.45626			YKR076W	YDR181C
YDR534C	1.73891	YDL081C	-0.75089	YHR137W	1.6925				YDL124W	1.46565	1.32049	1.4539			YLR345W	YCR092C
YDR380W	1.73534	YBR139W	1.18595	YGR240C	-0.947823				YDR119W-A	0.958664	2.48393	1.45113			YBR006W	YOR375C
YNL289W	1.72432	YKL161C	1.11502	YOR332W	-1.22055				YPL134C	1.21737	0.388164	1.4377			YAR023C	YJL126W
YLR151C	1.72326	YHR010W	-0.731136	YGL030W	-1.20271				YJL144W	1.26074	2.25912	1.42338			YGR019W	YMR267W
YMR018W	1.70913	YOR347C	1.48523	YML022W	-1.255				YNL279W	1.63835	0.750002	1.42136			YJL133C-A	YKL188C
YLR142W	1.70741	YDR038C	0.716082	YER074W	-1.03505				YGL222C	1.22152	2.53906	1.42067			YCL025C	YCL004W
YHL035C	1.70531	YKL103C	1.44153	YOR096W	-1.15168				YOL048C	1.37734	1.10579	1.41911			YIL111W	YGL136C
YCL056C	1.70191	YMR202W	-0.849684	YNL016W	-1.0267				YKL051W	1.54081	0.471561	1.4132			YMR096W	YMR306W
YDL197C	1.70111	YKL065C	1.09523	YBR286W	-1.01641				YIL028W	1.47228	0.594502	1.41085			YDL238C	YDR109C
YIL165C	1.69784	YGL037C	1.85712	YIL123W	-1.00681				YKL150W	1.51223	0.776561	1.40967			YCR063W	YAR050W
YNR059W	1.69419	YML063W	-0.744301	YDR001C	1.51708				YGR149W	1.42845	1.65535	1.40889			YDL130W-A	YLR431C
YPL088W	1.69409	YLR213C	-1.904	YDR033W	-1.021				YBR105C	1.16928	1.41629	1.40826			YIL077C	YMR023C
YCR038C	1.69236	YMR120C	1.08195	YOR309C	-1.8603				YDR074W	1.54111	1.49131	1.40437			YHR075C	YPL233W
YOR381W	1.68788	YNR050C	-0.833583	YBL087C	-1.18618				YCL012C	1.4759	0.354613	1.40403			YKL107W	YCR079W
YOL159C	1.68518	YJL002C	-0.853567	YKR057W	-1.31556				YCR026C	1.3598	0.494435	1.40057			YKL096W	YCR035C
YIL111W	1.68499	YLR304C	0.719188	YGR148C	-1.01811				YLR142W	1.70741	2.5955	1.3995			YML091C	YDR022C
YOR380W	1.68351	YJR139C	-0.716682	YLR441C	-1.00187				YKR076W	1.61121	1.43354	1.39495			YNR001C	YGR238C
YGL251C	1.67929	YDL169C	2.52608	YPL220W	-1.12691				YLR345W	1.3223	0.957727	1.39346			YKL201C	YDR438W
YJL199C	1.67465	YKL159C	1.25262	YLR372W	-1.14926				YBR006W	1.37979	1.82802	1.39198			YGR225W	YKL017C
YCL038C	1.67327	YHR216W	-0.952979	YDR144C	-1.30485				YAR023C	1.42703	0.683304	1.3827			YNL092W	YPL264C
YLL057C	1.66969	YGR189C	0.754703	YMR229C	-0.938003				YGR019W	1.51123	0.773787	1.37965			YKL091C	YOL154W
YOR365C	1.6692	YDR171W	1.90306	YNL175C	-1.30651				YJL133C-A	1.62893	1.99229	1.37832			YGR110W	YDR014W
YBL075C	1.6676	YHR215W	-0.947087	YJR009C	-0.929095				YCL025C	1.41922	0.407306	1.37567			YDR106W	YHR176W
YMR114C	1.6669	YOR306C	1.37722	YKL217W	3.9142				YIL111W	1.68499	1.29498	1.37543			YLR284C	YGR221C
YKL050C	1.6661	YLR167W	-0.711618	YDL084W	-0.963807				YMR096W	1.2736	2.349	1.37484			YMR175W	YDR046C
YDL199C	1.66559	YIL108W	0.860909	YJR130C	1.5333				YDL238C	1.54662	0.388743	1.37155			YKL151C	YNL063W
YDR009W	1.66312	YDR321W	-0.774178	YGR123C	-1.22161				YCR063W	1.50655	0.317622	1.36241			YGL104C	YHL014C
YCR105W	1.66289	YOL130W	-1.01873	YLR344W	-1.03169				YDL130W-A	1.18203	2.50525	1.35681			YCR071C	YAL047C
YDR258C	1.6606	YHR104W	1.43903	YCL010C	1.74765				YIL077C	1.32862	0.79431	1.34793			YCR042C	YNL025C
YDL109C	1.65938	YGL076C	-0.704469	YJL106W	2.97823				YHR075C	1.38739	0.704709	1.34651			YGR053C	YKR004C
YGL037C	1.65411	YLR048W	-0.831699	YGR020C	-1.39154				YKL107W	2.0342	2.1058	1.33968			YKL109W	YNL328C
YAR050W	1.65332	YMR011W	0.702362	YDL075W	-1.05591				YKL096W	1.5042	1.93753	1.3394			YML107C	YPL068C
YBR293W	1.65172	YBR221C	-0.713735	YOR128C	2.14677				YML091C	1.26026	1.09602	1.3381			YGL158W	YHR048W
YBR008C	1.64955	YHR141C	-0.741676	YEL027W	-1.21017				YNR001C	1.2843	1.56075	1.33693			YDR318W	YOR128C
YIR019C	1.64856	YDR500C	-0.719013	YLR044C	-0.931871				YKL201C	1.31602	0.820144	1.33519			YGR153W	YDL206W
YPL066W	1.64768	YGR192C	-0.729323	YJL026W	-1.25711				YGR225W	1.61125	1.09821	1.33104			YGL096W	YNL006W
YDR058C	1.64595	YKL181W	-1.12952	YGR094W	-0.888854				YNL092W	1.44198	0.594546	1.3221			YIR007W	YJL213W
YOR060C	1.64018	YLR270W	1.42017	YPR002W	2.55596				YKL091C	1.33576	1.46443	1.31972			YJL159W	YJL100W
YNL279W	1.63835	YER035W	1.46337	YGL125W	1.58937				YGR110W	1.3161	1.18943	1.31971			YJR036C	YNL257C
YGL125W	1.63683	YDR119W-A	2.48393	YCR002C	1.11443				YDR106W	1.14334	0.7712	1.31567			YHR104W	YOR172W
YGL146C	1.63644	YOR120W	3.21637	YER102W	-0.999985				YLR284C	1.34448	1.0404	1.31082			YCL033C	YDR082W
YMR170C	1.63586	YHR043C	1.21216	YFL004W	-1.10074				YMR175W	2.26207	2.54394	1.30675			YKL093W	YOR367W
YLL039C	1.63358	YOR348C	1.88712	YBL027W	-1.03836				YKL151C	1.38722	1.23643	1.30638			YBR050C	YEL049W
YHR137W	1.63244	YER037W	1.09647	YGR260W	-1.46225				YGL104C	1.31171	0.748704	1.30483			YLR289W	YJL093C
YFL055W	1.63149	YCR043C	-0.859047	YPL198W	-0.940112				YCR071C	0.979091	0.330553	1.30082			YDR448W	YCR105W
YPL258C	1.62959	YIL148W	-0.683445	YOR312C	-0.910793				YCR042C	1.34002	0.311784	1.29739			YLR317W	YGL117W
YJL133C-A	1.62893	YOR253W	-0.941548	YPR163C	-1.04551				YGR053C	1.33706	1.20299	1.29271			YEL005C	YDR254W
YOL091W	1.6256	YBR249C	-0.771148	YCR014C	2.40302				YKL109W	1.41494	0.875029	1.28894			YOR037W	YLL051C
YCL016C	1.62427	YNL069C	-0.708127	YNR043W	-1.00821				YML107C	1.29319	0.415179	1.28842			YBR149W	YMR154C
YER024W	1.62366	YGL157W	0.735875	YAL023C	-1.11577				YGL158W	1.24599	0.32043	1.28073			YBR214W	YHR156C
YHL036W	1.62319	YER110C	-1.05044	YPR030W	2.84347				YDR318W	1.2112	0.545103	1.27782			YCR075W-A	YDR386W
YNL065W	1.62107	YMR316W	1.33402	YJR025C	-1.52726				YGR153W	1.41151	1.21696	1.2775			YGR239C	YGR131W
YGR225W	1.61125	YGR177C	-0.995254	YPR160W	4.08265				YGL096W	1.54465	1.94412	1.27336			YPL223C	YGL212W
YKR076W	1.61121	YBR105C	1.41629	YDL095W	-1.17808				YIR007W	1.39653	0.665632	1.27086			YDR231C	YGR288W
YJR151C	1.60462	YPL230W	2.70303	YCL004W	2.04009				YJL159W	0.894152	1.53204	1.27049			YBR132C	YBR270C
YOR059C	1.60321	YDR226W	-0.920823	YKR094C	-0.988823				YJR036C	1.43384	0.439341	1.25669			YER079W	YPL216W
YML002W	1.59868	YMR217W	-1.25576	YCR015C	2.10825				YHR104W	1.37373	1.43903	1.25645			YNR064C	YFL050C
YDR001C	1.59726	YAL038W	-0.736302	YLR406C	-1.10441				YCL033C	1.33673	0.382245	1.25485			YBR297W	YDL080C
YLR173W	1.59615	YCL035C	1.38624	YJR070C	-1.17561				YKL093W	1.27141	1.27708	1.25436			YLL026W	YIL009C-A
YFL053W	1.58983	YOR273C	1.77284	YHR179W	-1.25465				YBR050C	1.2281	0.788824	1.25292			YDR516C	YGL251C
YPL250C	1.58628	YLL019C	1.15873	YCR023C	1.53861				YLR289W	1.14413	0.427949	1.25163			YDL234C	YIL092W
YDR277C	1.58515	YDR232W	-0.910103	YBR187W	-1.32625				YDR448W	1.11929	1.05143	1.24402			YOL082W	YPL151C
YLR453C	1.57832	YLR438W	0.830026	YCR042C	1.29739				YLR317W	1.32969	0.36334	1.24268			YBL078C	YPL214C
YLL063C	1.57689	YPL189C-A	1.41146	YOR208W	1.72311				YEL005C	1.26024	0.545564	1.23553			YLL019C	YBR223C
YIL155C	1.5757	YLR299W	0.848267	YER023W	-1.09106				YOR037W	1.14273	0.433875	1.22962			YLR446W	YER076C
YCR023C	1.57498	YBL092W	-0.660207	YBL043W	4.90094				YBR149W	1.21537	1.22638	1.22906			YER077C	YGR289C
YCR075C	1.57307	YPL186C	3.00652	YHR064C	-0.938275				YBR214W	1.42695	1.47332	1.22724			YMR262W	YBR293W
YIL073C	1.57233	YKL191W	-1.34413	YCL025C	1.37567				YCR075W-A	0.816353	0.283226	1.22698			YGR174C	YHR080C
YIL169C	1.57088	YOL039W	-0.644881	YNL010W	-1.00955				YGR239C	1.06304	0.527013	1.22417			YMR101C	YAL015C
YAL054C	1.57042	YGL056C	0.813981	YDR012W	-1.09823				YPL223C	1.77264	4.33239	1.22112			YJR152W	YGR170W
YJR073C	1.5675	YOR220W	1.40589	YML026C	-1.04509				YDR231C	1.38395	0.93628	1.2181			YKL124W	YGR015C
YCL024W	1.56291	YJL080C	-0.898077	YDL133C-A	-3.41548				YBR132C	1.32252	1.52866	1.2159			YNL305C	YPL174C
YHL037C	1.56043	YOL121C	-0.629537	YMR308C	-0.957868				YER079W	1.24814	1.62699	1.21376			YCL057C-A	YOR275C
YLR266C	1.55868	YCR031C	-0.695734	YIL155C	1.53562				YNR064C	1.53845	2.54209	1.21311			YGL248W	YPL003W
YLR376C	1.55295	YBL087C	-0.692965	YDR500C	-1.02551				YBR297W	1.14097	0.357378	1.2128			YGL128C	YLR456W
YHL047C	1.55159	YOR346W	-1.18773	YDR232W	-1.10112				YLL026W	1.23816	1.82704	1.21135			YCR030C	YDR534C
YDL238C	1.54662	YDR019C	1.21652	YHR029C	-1.60363				YDR516C	1.18889	1.03604	1.20821			YLR304C	YDR366C
YDL079C	1.54581	YBR241C	1.14045	YCR054C	1.47468				YDL234C	1.30465	1.61294	1.20356			YFL053W	YCL014W
YEL057C	1.54472	YHR120W	-1.22787	YHL033C	-1.01595				YOL082W	1.33211	0.860265	1.20317			YIR028W	YCL056C
YGL096W	1.54465	YER026C	1.02387	YKL081W	-0.849501				YBL078C	0.964726	1.89531	1.20316			YKL162C	YOR349W
YOR010C	1.54451	YLL023C	1.00115	YDL136W	-0.965724				YLL019C	1.12594	1.15873	1.20241			YHR124W	YJL023C
YBL074C	1.54138	YNL302C	-0.647937	YGL200C	-1.13186				YLR446W	1.34654	1.62091	1.20237			YCL055W	YNR059W
YDR074W	1.54111	YNR043W	-0.724327	YDR346C	-1.10527				YER077C	1.36551	0.986337	1.20233			YJL049W	YHR194W
YKL051W	1.54081	YDR450W	-0.680904	YBR031W	-1.09502				YMR262W	1.12599	0.564678	1.20143			YER101C	YJR006W
YMR052W	1.54012	YKL043W	-1.19357	YDR064W	-0.97412				YGR174C	1.05434	0.974186	1.19563			YPR081C	YJL090C
YOR366W	1.53942	YGL189C	-0.61384	YBR149W	1.22906				YMR101C	1.52869	1.08578	1.19473			YLR408C	YGR287C
YNR064C	1.53845	YBR084C-A	-0.755582	YHR203C	-0.871092				YJR152W	1.35331	2.0669	1.19376			YJR039W	YPR153W
YMR056C	1.53494	YGR161C	1.46368	YOR136W	0.99106				YKL124W	1.15484	0.644261	1.19294			YDR358W	YHR018C
YMR101C	1.52869	YAR071W	-0.899653	YCL024W	1.46152				YNL305C	1.1184	1.44649	1.18941			YDL110C	YJR107W
YCR066W	1.52603	YDL083C	-0.654266	YEL039C	2.43641				YCL057C-A	1.1141	0.300433	1.18616			YKL159C	YPL022W
YKL222C	1.52343	YHR006W	0.881512	YHR211W	1.72046				YGL248W	1.49727	1.34072	1.18422			YJR151C	YOL138C
YNR056C	1.52197	YCL018W	-0.839793	YGR105W	-1.9801				YGL128C	0.946127	0.633402	1.18299			YJR096W	YDR011W
YNL125C	1.51702	YHR019C	-0.713543	YPL145C	-0.982968				YCR030C	1.20324	0.428038	1.18072			YDR085C	YKR102W
YPL092W	1.51652	YAL017W	0.938625	YGR061C	-0.906862				YLR304C	1.04325	0.719188	1.17962			YKR077W	YDR013W
YDL231C	1.51547	YOL127W	-0.688267	YKL054C	-0.994512				YFL053W	1.58983	5.01774	1.17805			YKL142W	YHL048W
YLL059C	1.51492	YOL040C	-0.64769	YHR033W	1.87677				YIR028W	2.09316	1.21878	1.17336			YOR386W	YHR150W
YHR180W	1.51315	YOL120C	-0.680539	YNR016C	-1.0361				YKL162C	1.24444	1.00859	1.17271			YGR016W	YPR066W
YJR130C	1.51261	YJR105W	-0.735199	YJR145C	-0.868606				YHR124W	1.19807	0.743845	1.17031			YDR265W	YGL079W
YKL150W	1.51223	YNL301C	-0.63422	YOR303W	1.2083				YCL055W	1.08352	0.748166	1.15684			YCR011C	YPR085C
YIL120W	1.5117	YGR148C	-0.757057	YFR032C-A	-1.1234				YJL049W	0.876617	0.861793	1.15408			YIL097W	YOR080W
YGR019W	1.51123	YDL204W	3.11631	YIL052C	-1.15545				YER101C	1.13599	0.560876	1.15224			YMR030W	YMR294W
YCR024C	1.50865	YDL084W	-0.723238	YPL066W	1.68042				YPR081C	1.14807	0.385942	1.15179			YIL045W	YCR014C
YCR063W	1.50655	YML024W	-0.645079	YPR181C	-1.01901				YLR408C	1.00907	1.17036	1.15171			YIL050W	YER163C
YKL096W	1.5042	YCL038C	1.08575	YER009W	-1.00723				YJR039W	1.2654	0.559505	1.1497			YPL123C	YLR266C
YBR020W	1.50306	YHR138C	1.42186	YER054C	3.41415				YDR358W	1.19087	1.07786	1.14818			YLR177W	YHL047C
YGL248W	1.49727	YKR061W	1.34184	YGR285C	-0.87946				YDL110C	1.13714	1.39129	1.14594			YMR040W	YJL013C
YCR032W	1.4896	YMR251W-A	1.38935	YGR019W	1.37965				YKL159C	1.14932	1.25262	1.14334			YCR002C	YLR189C
YOR005C	1.48609	YPL123C	1.36674	YLR194C	1.07215				YJR151C	1.60462	0.326564	1.13699			YPL219W	YCL029C
YCR010C	1.48606	YKR076W	1.43354	YLR167W	-1.07327				YJR096W	1.32161	1.46924	1.1349			YMR135C	YCL057W
YCL012C	1.4759	YER067W	3.40615	YOL064C	-1.26559				YDR085C	1.33231	1.18919	1.1345			YDR133C	YPL147W
YGR008C	1.47562	YLR340W	-0.721077	YLR149C	2.7684				YKR077W	0.847897	1.09536	1.1341			YLR414C	YOL091W
YEL049W	1.47397	YDL021W	2.44978	YGL037C	1.51721				YKL142W	1.13683	1.10435	1.12887			YLL041C	YDR523C
YIL028W	1.47228	YKR059W	-0.666157	YDR277C	1.68673				YOR386W	1.2881	0.793835	1.12692			YMR055C	YMR316C-B
YJR153W	1.47123	YPL158C	0.724462	YLR168C	1.48016				YGR016W	1.36428	0.292477	1.12449			YMR041C	YMR224C
YDR402C	1.47029	YMR142C	-0.790907	YDR242W	2.32888				YDR265W	0.979042	0.399959	1.12338			YPL089C	YDR291W
YGR194C	1.46946	YOR178C	4.43989	YPL090C	-0.910204				YCR011C	1.24712	0.45235	1.12333			YDR479C	YOR205C
YKL133C	1.46702	YBL011W	-0.739313	YCR030C	1.18072				YIL097W	1.25893	0.97493	1.12198			YMR280C	YLL055W
YDL124W	1.46565	YNL058C	0.877629	YCR003W	1.5635				YMR030W	1.33373	0.382928	1.12156			YLR194C	YCR069W
YDL022W	1.46487	YGR091W	-1.16432	YBR127C	-0.870676				YIL045W	1.03302	1.07442	1.12097			YOR227W	YHL032C
YCR003W	1.4624	YBR149W	1.22638	YGL147C	-1.03292				YIL050W	1.06699	1.38178	1.11851			YBR053C	YNL230C
YNR014W	1.45858	YJR096W	1.46924	YHR068W	-0.995777				YPL123C	1.21397	1.36674	1.1164			YJL057C	YOR238W
YNL046W	1.4493	YPR043W	-0.685202	YMR186W	-0.996132				YLR177W	1.25854	0.969048	1.11631			YOR036W	YIL049W
YOR177C	1.44804	YDR085C	1.18919	YKL142W	1.12887				YMR040W	1.36589	1.15311	1.11537			YMR204C	YLL006W
YOR318C	1.44761	YIR011C	0.758402	YPR086W	-1.38064				YCR002C	1.09634	0.312363	1.11443			YPL248C	YFL044C
YNL092W	1.44198	YBR132C	1.52866	YGR189C	0.888176				YPL219W	0.779181	1.01563	1.10479			YPL119C	YCR090C
YJR036C	1.43384	YJL138C	-0.654045	YGL008C	-0.833953				YMR135C	0.997419	0.978102	1.09852			YBR262C	YNL056W
YCR081W	1.43329	YOR095C	-1.06695	YHR141C	-0.938156				YDR133C	1.08707	0.419579	1.09831			YMR025W	YLL059C
YJR127C	1.4301	YOR293W	-0.634476	YOL127W	-0.914756				YLR414C	1.09601	1.41239	1.0939			YLR225C	YCL063W
YGR149W	1.42845	YDR037W	-0.825989	YCR068W	1.71226				YLL041C	1.04142	0.582529	1.08533			YDR316W	YEL023C
YAR023C	1.42703	YGR180C	-0.740249	YOR198C	-0.922774				YMR055C	1.39084	0.92704	1.07848			YEL060C	YMR127C
YBR214W	1.42695	YER117W	-0.665587	YGL103W	-0.995989				YMR041C	1.0476	0.811378	1.07814			YDR381C-A	YGR075C
YPR085C	1.42222	YBR084W	-0.979835	YMR169C	2.0753				YPL089C	1.23308	0.675982	1.07672			YMR315W	YLR263W
YDR366C	1.42162	YNL208W	0.969301	YFR017C	2.7395				YDR479C	1.15617	0.675481	1.07581			YKR046C	YDR370C
YNL331C	1.41966	YHL033C	-0.632641	YGL099W	-1.25117				YMR280C	0.997685	2.18675	1.07546			YJL185C	YMR064W
YCL025C	1.41922	YIL014W	-0.939905	YBR078W	-0.842313				YLR194C	1.03594	2.03561	1.07215			YDR309C	YBL060W
YCR054C	1.41755	YGR030C	1.01839	YCR007C	3.00794				YOR227W	1.21801	0.632251	1.06538			YPL109C	YBR063C
YKL109W	1.41494	YNL178W	-0.643268	YMR079W	-1.00668				YBR053C	1.01471	1.27525	1.0631			YKL087C	YLR315W
YGR153W	1.41151	YNL162W	-0.686105	YBR015C	-1.06259				YJL057C	1.14448	0.85016	1.05228			YIL113W	YGL125W
YIR014W	1.41082	YBR053C	1.27525	YMR121C	-1.03045				YOR036W	0.98297	1.24158	1.04908			YJL079C	YMR065W
YEL063C	1.40252	YML057W	0.790405	YNL037C	0.957675				YMR204C	0.901798	1.00671	1.03425			YOR136W	YJL046W
YCR019W	1.40177	YHR203C	-0.632996	YDR210W	-1.35757				YPL248C	0.868346	0.901691	1.034			YIL055C	YML099C
YBR184W	1.40026	YML073C	-0.705616	YPR184W	1.75761				YPL119C	1.30451	1.3633	1.0329			YGR109C	YDL243C
YIR007W	1.39653	YDR070C	2.57339	YDR133C	1.09831				YBR262C	0.824996	0.4908	1.03164			YNL200C	YMR018W
YGR045C	1.39566	YBL027W	-0.718247	YKL150W	1.40967				YMR025W	1.29074	0.3391	1.03007			YJL065C	YPL272C
YDR386W	1.39463	YHL015W	-0.673392	YEL033W	-1.63447				YLR225C	0.971272	1.26494	1.02709			YBR056W	YKL098W
YMR055C	1.39084	YBR155W	-0.982428	YJL148W	-1.1691				YDR316W	0.868894	0.795816	1.02323			YCR077C	YBR298C
YHR075C	1.38739	YMR081C	2.44643	YKL096W-A	-0.850965				YEL060C	1.18139	1.90843	1.01936			YDL216C	YGR068C
YKL151C	1.38722	YDL199C	1.91113	YGR180C	-1.00754				YDR381C-A	0.902438	0.810169	1.01444			YIL107C	YLR273C
YDR231C	1.38395	YER138W-A	-1.09468	YHR072W-A	-1.38439				YMR315W	0.973324	1.54421	1.00666			YBR139W	YIL161W
YOR363C	1.3804	YPL245W	-1.10256	YGL202W	-0.951807				YKR046C	1.04854	0.817315	1.00593			YPL054W	YJL058C
YBR006W	1.37979	YBL064C	1.65644	YCR077C	0.988238				YJL185C	1.10797	0.566382	1.00575			YMR316W	YBR216C
YOL048C	1.37734	YBR031W	-0.704564	YOR101W	-1.45727				YDR309C	0.758537	1.15816	1.0046			YER130C	YFR046C
YDR059C	1.37549	YOR052C	1.29127	YOR276W	-1.01346				YPL109C	0.893665	0.663953	1.00236			YIL017C	YBR065C
YDR421W	1.37411	YBR015C	-0.85876	YLR327C	5.03042				YKL087C	0.813046	0.898943	1.00134			YHR030C	YER109C
YDR350C	1.3741	YDR064W	-0.620842	YCR024C-B	-1.34123				YIL113W	1.19368	1.57471	0.998107			YEL057C	YCL061C
YHR104W	1.37373	YOR133W	-0.871833	YGL222C	1.42067				YJL079C	1.05375	0.72395	0.996537			YPR046W	YCR081W
YCL061C	1.37212	YFR032C-A	-0.724396	YNL154C	-1.08372				YOR136W	0.873734	0.566321	0.99106			YKL208W	YCR020C
YMR023C	1.37153	YNL117W	2.9634	YKL084W	-2.44726				YIL055C	1.03587	0.812921	0.990238			YER158C	YNL143C
YCL035C	1.37053	YDL210W	2.11159	YBR162C	-0.915139				YGR109C	0.941306	0.704608	0.989399			YOR185C	YDL197C
YHL042W	1.37039	YLR029C	-0.639305	YMR243C	-1.12088				YNL200C	0.947069	1.27785	0.989396			YPL213W	YMR284W
YMR040W	1.36589	YPL090C	-0.615209	YOR167C	-1.13216				YJL065C	0.890525	0.390092	0.989384			YJL066C	YLR007W
YER077C	1.36551	YPL198W	-0.606924	YOR116C	-1.05846				YBR056W	1.06512	0.973386	0.988238			YNL037C	YDR007W
YGR016W	1.36428	YER081W	0.708493	YOR085W	-1.22096				YCR077C	0.878082	0.274251	0.988238			YCR088W	YIL084C
YBR076W	1.36026	YMR304W	0.715936	YAL061W	2.89792				YDL216C	0.867444	0.758198	0.981503			YML041C	YDR402C
YCR026C	1.3598	YEL042W	-0.84522	YEL063C	1.49083				YIL107C	1.13674	1.21561	0.977859			YOL009C	YLR247C
YDR379C-A	1.35384	YIL094C	-0.691177	YMR303C	-1.14518				YBR139W	0.913062	1.18595	0.975521			YJL163C	YCR082W
YJR152W	1.35331	YKL081W	-0.793874	YBR181C	-0.877865				YPL054W	1.0961	2.12952	0.975409			YPL175W	YOL158C
YLR346C	1.35149	YEL006W	-1.02461	YKL188C	2.50565				YMR316W	1.1973	1.33402	0.974426			YLR164W	YER066W
YHR210C	1.34968	YDL233W	1.01368	YDR082W	2.17967				YER130C	1.00046	0.937919	0.973934			YML087C	YHR105W
YPR121W	1.34878	YML019W	-0.887506	YBL004W	-1.05573				YIL017C	1.11439	0.754624	0.971077			YDR179C	YOR022C
YLR446W	1.34654	YOR356W	-0.821574	YGR204W	-0.951555				YHR030C	1.08494	1.26376	0.969808			YDL222C	YNL261W
YIR016W	1.34579	YOR063W	-0.661674	YGR106C	-1.065				YEL057C	1.54472	0.90777	0.967531			YIL087C	YLR381W
YLR284C	1.34448	YKR011C	1.18686	YNL070W	-1.47993				YPR046W	0.855698	0.424432	0.965937			YDR383C	YGL211W
YDR332W	1.34012	YHR025W	-0.695834	YOR341W	-0.787606				YKL208W	1.15563	0.667784	0.964922			YMR053C	YBR274W
YCR042C	1.34002	YLR178C	2.79948	YDL231C	1.33759				YER158C	1.17242	1.23392	0.962337			YAL055W	YJL110C
YJR021C	1.33781	YKL184W	-0.620395	YGR292W	2.54805				YOR185C	0.995256	1.87395	0.962133			YBL091C-A	YHR091C
YGR053C	1.33706	YMR090W	1.85484	YOR210W	-1.24745				YPL213W	0.801921	0.643562	0.960297			YHR038W	YHR134W
YCL033C	1.33673	YEL054C	-0.609178	YNL125C	1.37431				YJL066C	0.790083	0.985971	0.960234			YOL071W	YCR094W
YKL091C	1.33576	YJR124C	-1.13457	YEL055C	-0.96547				YNL037C	0.836179	0.409769	0.957675			YIL117C	YOR077W
YMR030W	1.33373	YDR206W	-1.09651	YER120W	-1.07555				YCR088W	0.791142	0.284316	0.956474			YNR014W	YGL134W
YDR085C	1.33231	YDR385W	-0.859401	YML042W	2.77844				YML041C	0.681149	0.762008	0.955012			YER026C	YOL146W
YOL082W	1.33211	YAR027W	0.865468	YDL232W	-2.34665				YOL009C	1.0177	0.492518	0.954706			YOR220W	YBR291C
YPL111W	1.33139	YDR058C	1.66484	YPL079W	-0.97755				YJL163C	1.07339	0.65318	0.951013			YGR189C	YCR044C
YCL032W	1.33036	YOL031C	0.742894	YBR283C	-0.97222				YPL175W	1.06674	0.82631	0.948283			YDR191W	YDL176W
YLR317W	1.32969	YGR205W	1.37156	YOR328W	1.73859				YLR164W	1.14951	1.04054	0.947936			YCR009C	YPL258C
YDR124W	1.32887	YHR137W	1.07453	YDR441C	-1.47915				YML087C	0.665919	0.350944	0.943307			YLR283W	YBR008C
YIL077C	1.32862	YDL075W	-0.651479	YDR483W	-0.926903				YDR179C	0.748046	0.476344	0.938273			YBL080C	YHR211W
YBR132C	1.32252	YML119W	0.85272	YJR064W	-0.922786				YDL222C	1.30954	2.48771	0.936374			YGR108W	YLR394W
YLR345W	1.3223	YPR102C	-0.614259	YDR406W	1.57687				YIL087C	0.77061	1.09422	0.93341			YKR049C	YBL106C
YJR096W	1.32161	YER054C	2.69774	YGR085C	-0.831868				YDR383C	1.08742	0.790882	0.933247			YPR201W	YIL165C
YOR350C	1.32156	YGR285C	-0.637279	YLL019C	1.20241				YMR053C	1.09885	1.28802	0.931489			YCR083W	YBR259W
YGR110W	1.3161	YDR380W	1.34816	YIL148W	-0.868719				YAL055W	0.482795	0.432948	0.916891			YBR138C	YLR035C
YKL201C	1.31602	YMR116C	-0.674931	YJR105W	-0.926952				YBL091C-A	0.777746	1.00188	0.904806			YER175C	YPL133C
YDR530C	1.31394	YHR020W	-0.912712	YGL014W	-1.02607				YHR038W	0.652721	0.571537	0.900421			YBR295W	YOR381W
YPR153W	1.31354	YIL069C	-0.637924	YLR300W	0.808361				YOL071W	0.834473	0.780151	0.897748			YGR111W	YDR444W
YGL104C	1.31171	YOL097C	-0.698715	YMR105C	3.08101				YIL117C	1.08022	1.28476	0.895922			YDL027C	YDR214W
YDL222C	1.30954	YOR224C	-0.675563	YMR309C	-0.83253				YNR014W	1.45858	1.02266	0.893354			YOL083W	YCL030C
YDL234C	1.30465	YFR017C	2.31905	YLR056W	-1.02025				YER026C	0.948723	1.02387	0.889558			YDL025C	YPL071C
YPL119C	1.30451	YGR267C	-0.682462	YLR152C	1.81441				YOR220W	0.889667	1.40589	0.888241			YML120C	YGR057C
YFR022W	1.30117	YJL145W	-0.737884	YHR018C	1.05204				YGR189C	0.875985	0.754703	0.888176			YDR031W	YKL222C
YER015W	1.29951	YER023W	-0.611303	YER025W	-0.786573				YDR191W	0.806881	1.14714	0.888173			YGR235C	YPL072W
YBR065C	1.29424	YBR181C	-0.588278	YCL034W	1.12567				YCR009C	0.833445	0.462481	0.885469			YHR006W	YMR019W
YML107C	1.29319	YML100W	2.67257	YMR012W	-0.954103				YLR283W	1.07724	0.398147	0.884968			YER162C	YKL050C
YLR246W	1.29098	YDR144C	-1.11417	YNL014W	2.15862				YBL080C	0.81798	0.425226	0.880068			YPL236C	YHR153C
YMR025W	1.29074	YDR191W	1.14714	YGL225W	-0.994463				YGR108W	0.959201	1.08492	0.878585			YLR080W	YPR115W
YOR386W	1.2881	YKL006W	-0.67093	YHL016C	2.91585				YKR049C	1.10242	0.98753	0.876488			YNL115C	YCR020C-A
YNR001C	1.2843	YGL234W	-0.636107	YHR007C	-0.901369				YPR201W	0.846456	0.427894	0.875379			YNL270C	YLR320W
YOR162C	1.28049	YJL071W	-1.04909	YGL206C	-0.803633				YCR083W	0.993055	0.553569	0.874431			YLR037C	YEL063C
YOR303W	1.2798	YKR046C	0.817315	YOR236W	-2.19913				YBR138C	0.895447	0.785591	0.869567			YBR024W	YDR459C
YMR063W	1.27422	YGL026C	-0.584183	YDR025W	-0.870661				YER175C	0.963603	0.662703	0.867601			YDL119C	YBL088C
YJL023C	1.27362	YHR044C	1.0728	YOR247W	-0.885305				YBR295W	1.16799	1.24188	0.867291			YLR042C	YLR004C
YMR096W	1.2736	YPR114W	-0.878475	YEL037C	-1.04017				YGR111W	0.939581	0.309352	0.865672			YDR453C	YCL005W
YLR393W	1.27316	YJL171C	0.581012	YML085C	-0.853114				YDL027C	0.637806	0.453165	0.863945			YPL189C-A	YPL149W
YKL093W	1.27141	YDR538W	-0.941829	YKR058W	2.55585				YOL083W	1.06368	0.833909	0.862465			YOR003W	YCL008C
YBR223C	1.27108	YPL249C-A	-0.660973	YNR001C	1.33693				YDL025C	1.0576	0.572691	0.860018			YGL185C	YBR294W
YNL294C	1.26605	YGL067W	-0.842916	YBR299W	2.49061				YML120C	0.815248	0.709489	0.855008			YLR204W	YLR125W
YJR039W	1.2654	YOR036W	1.24158	YCL032W	1.48177				YDR031W	0.750757	1.17651	0.854812			YAL034C	YER051W
YOL015W	1.26447	YOR223W	1.19506	YOR059C	1.52257				YGR235C	0.726173	0.971034	0.854143			YBR126C	YOR148C
YLR233C	1.2627	YML056C	-1.23773	YCR081W	1.27392				YHR006W	0.908093	0.881512	0.851684			YJL048C	YDR541C
YJL144W	1.26074	YIL018W	-0.614701	YFL022C	-0.838391				YER162C	0.782802	0.846577	0.851012			YGR278W	YDR256C
YBL019W	1.26045	YFR031C-A	-0.633873	YCR076C	1.70265				YPL236C	0.760514	0.437671	0.850064			YBL059W	YDR078C
YML091C	1.26026	YKL218C	0.808631	YNL162W	-0.902716				YLR080W	0.76652	0.889536	0.848323			YHR198C	YDL231C
YEL005C	1.26024	YPL131W	-0.64567	YKL191W	-1.16172				YNL115C	0.775051	0.602487	0.84762			YOR368W	YDR349C
YNR066C	1.2594	YDL191W	-0.672193	YJR143C	-0.884919				YNL270C	1.17863	0.474366	0.845107			YFR045W	YJR131W
YIL097W	1.25893	YER074W	-0.619524	YCR021C	4.29523				YLR037C	1.05186	0.423328	0.842962			YKL045W	YBL074C
YLR177W	1.25854	YDL229W	-0.858321	YJR139C	-0.796825				YBR024W	0.736152	0.6114	0.840016			YJL155C	YER007W
YNL328C	1.25648	YOR335C	-0.763913	YJL052W	-0.750014				YDL119C	0.635668	0.938886	0.838935			YBR068C	YPL167C
YEL072W	1.24972	YOR011W	-1.22219	YKR092C	-1.1189				YLR042C	1.12168	0.620748	0.837375			YLR457C	YCL047C
YPL214C	1.2494	YER130C	0.937919	YBR079C	-0.773499				YDR453C	0.854978	1.29417	0.837373			YLR300W	YPR082C
YGL243W	1.24924	YMR297W	0.655287	YJL161W	3.38013				YPL189C-A	0.814608	1.41146	0.836464			YHR090C	YGL090W
YER079W	1.24814	YJR064W	-0.553067	YMR260C	-0.852308				YOR003W	0.793217	0.29643	0.835686			YBR076C-A	YLR016C
YCR011C	1.24712	YKL060C	-0.569734	YBR118W	-0.811046				YGL185C	0.788003	0.290642	0.834714			YPL052W	YMR172W
YCR079W	1.24645	YMR121C	-0.620262	YHR104W	1.25645				YLR204W	0.525143	0.955785	0.83263			YPR061C	YGR006W
YGL158W	1.24599	YLR388W	-0.605349	YDL197C	1.70687				YAL034C	0.749346	0.503746	0.832273			YDR030C	YDR364C
YKL162C	1.24444	YLR079W	0.782525	YFR031C-A	-0.928893				YBR126C	0.847079	1.02697	0.831794			YOL055C	YAL002W
YHR134W	1.24437	YPR033C	-0.737985	YDR281C	-4.81444				YJL048C	0.937074	0.429736	0.830977			YIL007C	YLR343W
YNL187W	1.24325	YHR021C	-0.663125	YIL043C	-0.992227				YGR278W	0.829631	0.313426	0.830959			YJL103C	YHR210C
YPL167C	1.24134	YJL076W	-0.760491	YKL109W	1.28894				YBL059W	0.624337	0.472459	0.830263			YDL113C	YNL187W
YLL026W	1.23816	YLR448W	-0.645278	YDR309C	1.0046				YHR198C	0.805812	0.313035	0.828366			YDR532C	YGR133W
YGR222W	1.23775	YBR213W	-1.17732	YML128C	2.70771				YOR368W	0.784801	0.403494	0.827977			YOR223W	YLL003W
YLR168C	1.23622	YNL291C	-1.02542	YOR051C	-1.07842				YFR045W	0.614893	0.648588	0.821823			YMR120C	YDR387C
YPL089C	1.23308	YBL072C	-0.614628	YER004W	-1.14476				YKL045W	0.758374	0.426472	0.815839			YBR280C	YLR318W
YBR050C	1.2281	YNL029C	-1.28787	YKL152C	-0.863524				YJL155C	1.03975	1.39846	0.814753			YHR142W	YCL036W
YJR135C	1.22341	YIL065C	0.953427	YIL018W	-0.901613				YBR068C	0.823324	0.521156	0.814748			YGL010W	YCR107W
YGL090W	1.22304	YJL062W	-0.734989	YPR080W	-0.802145				YLR457C	0.827264	0.378803	0.809159			YGL045W	YEL072W
YGL222C	1.22152	YCR024C-A	-0.607194	YGR248W	4.38238				YLR300W	0.939205	0.867291	0.808361			YGR161W-C	YFR022W
YOL155C	1.21975	YCL011C	-0.687901	YPL048W	-0.896607				YHR090C	0.68123	0.518301	0.807651			YOL053W	YLR233C
YPL072W	1.21932	YER158C	1.23392	YOL121C	-0.748659				YBR076C-A	0.684777	0.333766	0.806941			YCR004C	YMR069W
YHL022C	1.21812	YKR093W	0.723441	YPR041W	-0.814386				YPL052W	0.92245	0.768969	0.806029			YCR065W	YLR393W
YOR227W	1.21801	YMR215W	-0.589419	YNL300W	-1.08207				YPR061C	0.720862	0.803425	0.805997			YLR312W-A	YJR109C
YPL134C	1.21737	YHR026W	-0.585605	YJL136C	-0.84672				YDR030C	0.76452	0.407069	0.804848			YER098W	YOR060C
YDR438W	1.21591	YHR015W	-2.15138	YCL040W	3.17249				YOL055C	0.881711	0.488084	0.804714			YIL023C	YCR023C
YBR149W	1.21537	YAL061W	3.91621	YCL038C	1.51271				YIL007C	0.544569	0.635015	0.804409			YPL107W	YHR199C
YOL043C	1.21444	YDR345C	-1.0589	YJL116C	3.02039				YJL103C	0.846242	0.551128	0.804058			YGR207C	YLR412W
YPL123C	1.21397	YHR174W	-0.569395	YHR030C	0.969808				YDL113C	0.769157	0.336333	0.803738			YLR166C	YPL095C
YER041W	1.21361	YPL092W	1.04075	YLR178C	1.96237				YDR532C	0.677564	0.447782	0.800561			YAL053W	YHL022C
YCR095C	1.21256	YMR242C	-0.582583	YJL077W-B	-3.96339				YOR223W	0.701378	1.19506	0.795688			YDR435C	YMR063W
YDR318W	1.2112	YOR312C	-0.557545	YER026C	0.889558				YMR120C	0.5207	1.08195	0.794775			YNL223W	YHR129C
YBR063C	1.20855	YMR235C	-0.574561	YJR120W	-1.92436				YBR280C	0.700889	0.888673	0.794018			YOR035C	YBR256C
YEL030W	1.20768	YDL051W	-0.782042	YMR143W	-0.818864				YHR142W	0.893549	0.620652	0.790623			YKL121W	YGL154C
YCR030C	1.20324	YKL091C	1.46443	YLR414C	1.0939				YGL010W	0.745179	0.79927	0.789207			YPL026C	YLR014C
YHR124W	1.19807	YGR204W	-0.565339	YGL007C-A	-7.18313				YGL045W	0.764506	0.50468	0.784461			YGL141W	YLR097C
YMR316W	1.1973	YJR047C	-1.4435	YDR233C	-0.952628				YGR161W-C	0.712253	0.505926	0.783553			YML117W	YEL016C
YIL113W	1.19368	YGR094W	-0.78788	YMR065W	2.47982				YOL053W	0.702242	0.427115	0.783472			YOR028C	YBR043C
YDR285W	1.19363	YDR418W	-0.574144	YCL057C-A	1.18616				YCR004C	0.840233	0.261365	0.781353			YGR127W	YML002W
YDR358W	1.19087	YOR108W	-0.949704	YFL050C	1.69632				YCR065W	0.943493	0.486746	0.778401			YBR047W	YER015W
YPL164C	1.19009	YKL180W	-0.579921	YJL217W	-1.40271				YLR312W-A	0.660063	0.452337	0.778336			YDL072C	YNL249C
YBL060W	1.18944	YJL189W	-0.582137	YBR033W	3.13927				YER098W	0.91093	0.442722	0.77654			YBR241C	YEL025C
YDR516C	1.18889	YJL151C	0.901278	YPL082C	-0.986805				YIL023C	1.07974	0.450817	0.775401			YBR269C	YJR149W
YKR009C	1.18815	YPL171C	1.80867	YLR342W	-0.768953				YPL107W	0.520016	0.425363	0.775262			YOR104W	YJR122W
YFL049W	1.18789	YLR053C	5.00226	YPL217C	-0.868896				YGR207C	0.650945	0.430777	0.773987			YLR098C	YDL109C
YLL056C	1.18417	YGR235C	0.971034	YBL002W	-0.906028				YLR166C	0.681895	0.669711	0.773211			YAR033W	YCR053W
YDL130W-A	1.18203	YMR174C	2.27438	YCR088W	0.956474				YAL053W	0.882527	0.977411	0.772768			YBR085C-A	YLR046C
YOL117W	1.18165	YLR130C	-0.87015	YMR202W	-0.857747				YDR435C	0.798336	0.602641	0.771237			YAL017W	YDR160W
YEL060C	1.18139	YCL050C	-0.602687	YHR019C	-0.793798				YNL223W	0.789109	1.07736	0.771208			YBR203W	YBR107C
YLL055W	1.18131	YDR258C	1.2648	YER077C	1.20233				YOR035C	0.917862	0.6392	0.766766			YIL098C	YNL331C
YNL270C	1.17863	YKL129C	0.762689	YCR032W	1.31364				YKL121W	0.908554	0.65325	0.765394			YPR036W-A	YOR389W
YNL011C	1.17844	YEL034W	-0.597531	YHR089C	-1.07654				YPL026C	0.859557	1.1213	0.763945			YGR258C	YJL162C
YER158C	1.17242	YPL273W	-0.931556	YNR034W-A	2.98423				YGL141W	0.759953	0.774854	0.754087			YDL233W	YLR383W
YOR349W	1.17227	YGR019W	0.773787	YDR062W	-0.846291				YML117W	0.904091	0.802108	0.752123			YLR270W	YCR102C
YCL030C	1.16936	YLR297W	1.29017	YGL016W	-1.07261				YOR028C	1.07671	0.547953	0.751582			YER092W	YJR004C
YBR105C	1.16928	YER079W	1.62699	YMR170C	1.46048				YGR127W	0.688472	0.340829	0.751352			YGL223C	YNL254C
YBR295W	1.16799	YJR070C	-0.896863	YOR227W	1.06538				YBR047W	0.92302	0.30529	0.751316			YNL159C	YLR460C
YMR293C	1.16797	YLR350W	0.731851	YPR026W	1.70498				YDL072C	0.788219	1.46654	0.750943			YOR066W	YOL043C
YKL168C	1.1658	YLR406C	-0.614506	YGR286C	-1.46505				YBR241C	0.86903	1.14045	0.75083			YMR124W	YBR228W
YGL154C	1.16298	YPR075C	0.748184	YIL008W	-1.58479				YBR269C	0.627846	1.18334	0.748889			YDL049C	YOR305W
YLR394W	1.15993	YGR202C	-0.796557	YKR046C	1.00593				YOR104W	0.658209	0.275212	0.747651			YBR258C	YCL010C
YDR479C	1.15617	YLR168C	0.833312	YJL153C	2.59345				YLR098C	0.785599	0.27839	0.747464			YKL023W	YOR318C
YKL208W	1.15563	YHR061C	0.925931	YEL073C	3.01718				YAR033W	0.557571	0.358581	0.745548			YIL124W	YLR165C
YKL124W	1.15484	YHR139C	2.52118	YNL031C	-0.803787				YBR085C-A	1.01037	0.694296	0.744444			YPL206C	YKR022C
YLR381W	1.15311	YGR214W	-0.637128	YCR073W-A	1.11862				YAL017W	0.837259	0.938625	0.744354			YER037W	YNR056C
YGL059W	1.15184	YMR301C	-0.914222	YLR192C	-0.942898				YBR203W	0.944273	0.694313	0.744277			YOR155C	YCL002C
YLR164W	1.14951	YLR250W	0.664419	YER148W	-0.971945				YIL098C	0.494625	0.668765	0.743581			YNR034W	YDR004W
YKL159C	1.14932	YNR007C	0.881305	YNL307C	-0.846481				YPR036W-A	0.618364	1.46535	0.743287			YBR037C	YBR217W
YPR081C	1.14807	YMR105C	3.09327	YJL012C	-0.793714				YGR258C	0.763703	0.618191	0.741972			YGR092W	YFR005C
YLR227C	1.14493	YBR296C	1.21093	YML091C	1.3381				YDL233W	0.755414	1.01368	0.741132			YPR134W	YKR103W
YJL057C	1.14448	YIL133C	-0.537761	YCL033C	1.25485				YLR270W	0.84167	1.42017	0.739182			YOR018W	YDR285W
YLR289W	1.14413	YMR012W	-0.559929	YOR009W	2.04033				YER092W	0.50003	0.409685	0.737156			YGL226W	YBL113C
YDR106W	1.14334	YHR057C	-0.922347	YCL016C	1.61291				YGL223C	0.713711	0.285052	0.735349			YGL006W	YJL216C
YOR037W	1.14273	YMR135C	0.978102	YMR122W-A	-0.774628				YNL159C	0.615854	0.543037	0.734949			YNL157W	YCL011C
YLR004C	1.14138	YDR012W	-0.611778	YHR025W	-0.833595				YOR066W	0.887807	0.522583	0.731548			YDL210W	YNL094W
YBR297W	1.14097	YIL085C	-0.869978	YMR315W	1.00666				YMR124W	0.879516	0.640707	0.729215			YLL027W	YOR010C
YBR054W	1.13949	YGL103W	-0.624476	YPR043W	-0.940347				YDL049C	0.834516	0.43539	0.728388			YFR014C	YKL033W
YDL110C	1.13714	YHR064C	-0.58764	YLR333C	-0.980913				YBR258C	0.746618	0.824573	0.724884			YMR197C	YNL118C
YKL142W	1.13683	YLR040C	-1.31592	YJL191W	-0.835673				YKL023W	0.572886	0.56519	0.723384			YOL016C	YLL056C
YIL107C	1.13674	YLR043C	-0.829083	YBR183W	1.8505				YIL124W	0.819523	0.649241	0.723197			YNL134C	YCR106W
YPL064C	1.13638	YML124C	-0.667846	YDL058W	-1.0273				YPL206C	0.63577	0.328162	0.719775			YPL247C	YGR042W
YDL154W	1.13615	YDR379C-A	1.79901	YLR142W	1.3995				YER037W	0.736523	1.09647	0.71904			YBR071W	YHL046C
YER101C	1.13599	YER102W	-0.582437	YLR175W	-0.874577				YOR155C	0.789329	0.534264	0.719			YKL218C	YGL240W
YGR087C	1.13191	YNL118C	-0.703452	YNL248C	-0.952101				YNR034W	0.713514	0.674448	0.716664			YML129C	YGL175C
YMR262W	1.12599	YOL052C	-0.834811	YFL054C	1.749				YBR037C	0.807084	0.446603	0.71563			YMR068W	YER180C
YLL019C	1.12594	YBR214W	1.47332	YLR312C	3.4779				YGR092W	0.821756	0.607219	0.714806			YKL065C	YCR028C
YLR042C	1.12168	YBL057C	-0.774272	YDR212W	-0.738895				YPR134W	0.849026	1.04212	0.71463			YGR244C	YER041W
YER173W	1.12054	YPL119C	1.3633	YDR050C	-0.845218				YOR018W	0.843419	0.539744	0.711153			YLR201C	YJL044C
YDR448W	1.11929	YHL011C	-0.817687	YLR347C	-0.843508				YGL226W	0.606787	0.620615	0.708611			YNL100W	YMR176W
YPL174C	1.11851	YJL101C	-0.737847	YDR448W	1.24402				YGL006W	0.775758	0.562928	0.707648			YBL038W	YKL149C
YNL305C	1.1184	YEL017C-A	-0.709485	YCR017C	1.06116				YNL157W	0.61074	0.607218	0.707442			YDL017W	YOR192C
YPL216W	1.11737	YKL090W	-1.14774	YPL028W	-0.865825				YDL210W	0.786376	2.11159	0.706934			YOR226C	YPR121W
YIL017C	1.11439	YLR256W	-0.830193	YFL052W	2.89109				YLL027W	0.586671	0.490604	0.705845			YJL082W	YPR196W
YCL057C-A	1.1141	YLR249W	-0.766402	YMR318C	-0.834175				YFR014C	0.848463	0.905914	0.702303			YER035W	YCL018W
YPL095C	1.11225	YMR080C	-0.792764	YGR116W	-0.777447				YMR197C	0.594696	0.853439	0.701351			YBR005W	YPL064C
YHR153C	1.11045	YBR056W	0.973386	YGR149W	1.40889				YOL016C	0.862713	1.43542	0.700082			YDL183C	YOL164W
YEL023C	1.10903	YPL175W	0.82631	YOR355W	-0.99761				YNL134C	1.07915	0.349411	0.698263			YNR035C	YPL008W
YJL185C	1.10797	YEL026W	-0.647834	YAL012W	-0.835724				YPL247C	0.869882	0.726816	0.696358			YNL015W	YOR202W
YGR042W	1.10641	YGR194C	1.37211	YGL245W	-0.736553				YBR071W	0.576136	1.40546	0.696294			YPL222W	YDL154W
YPL024W	1.10345	YJL084C	0.690965	YML123C	-0.693925				YKL218C	0.663492	0.808631	0.695703			YML119W	YOR009W
YIL162W	1.10285	YGL014W	-0.673392	YNL024C-A	-1.36477				YML129C	0.590739	0.738389	0.694693			YIL108W	YJR112W-A
YNL063W	1.10276	YKL151C	1.23643	YCR071C	1.30082				YMR068W	0.770459	0.599069	0.694619			YKR011C	YBR145W
YKR049C	1.10242	YPL227C	-0.744571	YMR182W-A	-4.1923				YKL065C	0.651344	1.09523	0.69445			YPL154C	YML023C
YGR075C	1.10182	YCL055W	0.748166	YML018C	-1.1943				YGR244C	0.518761	0.74704	0.693097			YBL029C-A	YIR019C
YKL164C	1.10033	YMR118C	3.77444	YCR004C	0.781353				YLR201C	0.734796	0.458018	0.692003			YOL107W	YHR204W
YMR053C	1.09885	YJL081C	-0.761845	YJR048W	-0.982377				YNL100W	0.608755	0.685768	0.68673			YGR179C	YOL015W
YCR002C	1.09634	YBR205W	-0.662417	YLR173W	1.52391				YBL038W	0.526508	0.595958	0.686228			YNL222W	YOR378W
YMR278W	1.0961	YNL307C	-0.56276	YLR083C	-0.96779				YDL017W	0.72132	0.451723	0.684412			YKL141W	YKR069W
YPL054W	1.0961	YDL136W	-0.634822	YNL112W	-0.973972				YOR226C	0.658825	0.765772	0.683154			YJR161C	YLR227C
YLR414C	1.09601	YOL125W	-0.970479	YNL135C	-0.882207				YJL082W	0.795649	0.453957	0.679928			YNR066C	YEL030W
YKR104W	1.09276	YNL209W	-0.778782	YNL046W	1.49052				YER035W	0.878588	1.46337	0.678861			YAR027W	YDR332W
YDR383C	1.08742	YGL227W	0.811672	YPL032C	-1.00328				YBR005W	0.983268	0.657802	0.678767			YOL122C	YGL193C
YDR133C	1.08707	YGR092W	0.607219	YPR036W-A	0.743287				YDL183C	0.75259	0.615199	0.6768			YMR100W	YGL243W
YHR030C	1.08494	YPR045C	0.788609	YGL054C	-0.963355				YNR035C	0.599159	0.35162	0.675362			YER053C-A	YOR364W
YFR046C	1.08405	YDR354W	-0.620044	YHR039C-A	-0.764315				YNL015W	0.569433	1.4898	0.6752			YOL032W	YKL090W
YCL055W	1.08352	YBR085W	-1.46136	YGL120C	-0.81245				YPL222W	0.818221	0.42335	0.674119			YHR016C	YDR336W
YOR364W	1.08222	YLR204W	0.955785	YER136W	-0.855838				YML119W	0.484265	0.85272	0.669629			YPL087W	YKR104W
YIL117C	1.08022	YIR039C	1.10063	YLR355C	0.724807				YIL108W	0.668102	0.860909	0.667616			YMR073C	YLR040C
YIL023C	1.07974	YKL214C	-0.761653	YHL011C	-0.81322				YKR011C	0.742678	1.18686	0.667041			YPL152W	YOR377W
YNL134C	1.07915	YOR338W	2.27257	YGR027C	-0.896909				YPL154C	0.664423	0.643888	0.664704			YBR251W	YIL089W
YLR283W	1.07724	YNL223W	1.07736	YHR047C	-0.983986				YBL029C-A	0.845856	1.20348	0.663504			YNL012W	YOR303W
YOR028C	1.07671	YML027W	0.828268	YGR054W	-0.833269				YOL107W	0.755237	0.638734	0.66265			YOL017W	YNR069C
YDR131C	1.07535	YBR289W	0.657918	YDL234C	1.20356				YGR179C	0.505263	0.579539	0.662641			YHR147C	YER188W
YJL163C	1.07339	YER090W	-0.543576	YGL078C	-0.840847				YNL222W	0.556216	0.529379	0.662061			YBR054W	YOL058W
YIL071C	1.07295	YBR095C	0.759145	YER178W	-0.771916				YKL141W	0.568979	0.533716	0.660429			YMR194C-B
YHR018C	1.07287	YBR046C	0.990523	YLR134W	-0.923213				YJR161C	0.67279	0.321499	0.658969			YDL248W
YHR157W	1.06898	YKL086W	3.01746	YGR154C	2.1119				YNR066C	1.2594	0.635536	0.658582			YPL150W
YLR097C	1.06895	YKL148C	0.724607	YEL031W	-0.801234				YAR027W	0.697506	0.865468	0.656943			YER033C
YDL024C	1.06852	YIL160C	3.87215	YBR093C	-1.02907				YOL122C	0.770966	0.515952	0.655387			YDR185C
YIL050W	1.06699	YOR369C	-0.580388	YIL114C	-1.84889				YMR100W	0.607629	0.642019	0.653805			YIR038C
YPL175W	1.06674	YPL135W	1.00273	YGL226C-A	-1.45354				YER053C-A	0.69204	2.71738	0.651125			YPR155C
YDR459C	1.06569	YNL067W	-0.501385	YBL067C	-1.11316				YOL032W	0.842439	0.608167	0.650162			YLR205C
YBR056W	1.06512	YIL107C	1.21561	YPL186C	3.09289				YHR016C	0.699769	1.02095	0.650111			YFL042C
YAL037W	1.06464	YBR068C	0.521156	YDL140C	-0.767296				YPL087W	0.600765	0.762118	0.649102			YDL115C
YOL083W	1.06368	YOR173W	2.8155	YML073C	-0.778211				YMR073C	0.703285	0.476675	0.648552			YLR132C
YGR131W	1.06317	YGL204C	-1.03494	YPR063C	-1.02304				YPL152W	0.621949	0.506075	0.645343			YJL070C
YGR239C	1.06304	YNR064C	2.54209	YNR060W	-2.65549				YBR251W	0.54674	0.421297	0.644859			YIL106W
YCL034W	1.06149	YBR269C	1.18334	YPR183W	-0.849081				YNL012W	0.811851	0.296625	0.64383			YDR525W-A
YLR460C	1.06086	YMR038C	-0.648323	YNL305C	1.18941				YOL017W	0.550195	0.408937	0.643211			YFR003C
YDL025C	1.0576	YKL080W	-0.510337	YJR109C	0.733719				YHR147C	0.481581	0.573204	0.643192			YDR247W
YCL051W	1.05712	YCL040W	2.29923	YJL133C-A	1.37832				YBR054W	1.13949	1.42973	0.641598			YPL004C
YOL112W	1.05582	YDR342C	2.45442	YNR051C	-0.910131				YMR194C-B	0.710161	0.55372	0.639903			YDL044C
YGR174C	1.05434	YLR264W	-0.667971	YML048W	-0.863209				YDL248W	0.65711	0.343378	0.638635			YMR111C
YJL079C	1.05375	YLR192C	-0.622232	YCL052C	0.980455				YPL150W	0.754362	0.266884	0.634886			YOR215C
YOR205C	1.0536	YGR063C	0.766705	YGR008C	1.54781				YER033C	0.837068	0.347585	0.633297			YHR171W
YLR037C	1.05186	YIL039W	-0.769254	YCL055W	1.15684				YDR185C	0.764418	0.574402	0.632849			YJL059W
YKR046C	1.04854	YML116W	-1.19799	YLL018C	-0.700921				YIR038C	0.613901	0.84535	0.632108			YMR110C
YMR041C	1.0476	YIL136W	2.56704	YCR009C	0.885469				YPR155C	0.661309	0.295366	0.629803			YOR137C
YCR102C	1.04665	YDR277C	1.31261	YBL003C	-0.79393				YLR205C	0.628533	0.856326	0.628874			YOR385W
YIR005W	1.04638	YJL049W	0.861793	YGL040C	-0.9626				YFL042C	0.672401	0.336873	0.628132			YLR049C
YLL025W	1.04487	YPR058W	-0.835535	YHR143W-A	-1.23061				YDL115C	0.582012	0.479155	0.627884			YML131W
YLR304C	1.04325	YDL082W	-0.647907	YBR249C	-0.715511				YLR132C	0.522716	0.301853	0.627271			YLR438W
YLL041C	1.04142	YOL159C	0.983038	YHR143W	-0.866296				YJL070C	0.714276	0.62795	0.626202			YNL325C
YMR284W	1.04041	YLR356W	1.06856	YBR068C	0.814748				YIL106W	0.631588	0.275583	0.625936			YDL048C
YJL155C	1.03975	YNR019W	0.593223	YCL064C	-1.17973				YDR525W-A	0.815964	1.29922	0.625489			YLR254C
YER076C	1.03687	YER045C	0.764286	YKL181W	-0.808844				YFR003C	0.578608	0.735851	0.624932			YBR255W
YLR194C	1.03594	YMR271C	1.53799	YML024W	-0.783965				YDR247W	0.484229	1.57777	0.624618			YHL019C
YIL055C	1.03587	YGR105W	-0.774626	YDR119W	-0.839677				YPL004C	0.703756	0.731016	0.623737			YGR021W
YCR086W	1.03432	YGR153W	1.21696	YFR053C	3.22572				YDL044C	0.505594	0.422415	0.622284			YKL085W
YIL045W	1.03302	YHR145C	-1.06384	YJR077C	-0.8187				YMR111C	0.62497	0.437577	0.621212			YBR182C
YOR305W	1.02832	YJR145C	-0.507377	YJL014W	-0.737349				YOR215C	0.556044	0.303682	0.620606			YLR121C
YBL088C	1.02795	YPL219W	1.01563	YMR296C	-0.797792				YHR171W	0.741108	0.970445	0.61933			YKL062W
YBR237W	1.02457	YOL048C	1.10579	YKL117W	-0.776894				YJL059W	0.624685	0.271115	0.61761			YDR497C
YKR004C	1.02078	YGL232W	-0.698851	YNL121C	-0.721597				YMR110C	0.703357	0.682274	0.616236			YLR362W
YHR176W	1.01952	YDR343C	2.42406	YCR075C	1.516				YOR137C	0.81774	0.828623	0.616201			YBR046C
YOL009C	1.0177	YHR001W-A	1.05406	YDR321W	-0.724518				YOR385W	0.640755	1.39676	0.615678			YKL148C
YPL022W	1.01751	YOR262W	-0.822814	YML012W	-0.802185				YLR049C	0.65484	0.616169	0.615654			YDR511W
YKR102W	1.01742	YKR094C	-0.509306	YOR224C	-0.891964				YML131W	0.619018	0.347531	0.615189			YKL003C
YOL154W	1.01731	YER052C	-0.832535	YDR188W	-0.68411				YLR438W	0.521125	0.830026	0.611721			YBR225W
YMR306W	1.0151	YGR087C	2.50741	YCR095C	1.30864				YNL325C	0.676498	0.561007	0.6101			YLR094C
YBR053C	1.01471	YGL253W	-0.523863	YCR020C	2.50106				YDL048C	0.607857	0.401954	0.608258			YDL194W
YCR073W-A	1.0135	YCR034W	-0.719669	YCL056C	1.88612				YLR254C	0.731324	0.960807	0.60588			YGL056C
YOL100W	1.01288	YKL142W	1.10435	YDR350C	1.23891				YBR255W	0.636996	0.531195	0.605308			YOR161C
YBR085C-A	1.01037	YPR138C	-0.972304	YCL014W	0.843588				YHL019C	0.662056	0.408933	0.605264			YAR035W
YDR160W	1.01031	YPL106C	-0.530797	YPR085C	1.47528				YGR021W	0.528383	0.438644	0.604584			YDL024C
YLR408C	1.00907	YPL159C	0.831147	YOL097C	-0.780659				YKL085W	0.585388	0.413414	0.602335			YLR144C
YOR292C	1.00781	YBL048W	4.11139	YLR452C	-1.06804				YBR182C	0.739245	0.972458	0.601657			YDL057W
YCR017C	1.00729	YBR025C	-0.516063	YEL040W	-0.775726				YLR121C	0.603728	1.06405	0.599145			YGL250W
YLR315W	1.00613	YPL054W	2.12952	YBL098W	-1.44765				YKL062W	0.828956	0.779931	0.599055			YPL005W
YLR431C	1.0038	YBR028C	-0.745297	YGR168C	1.78029				YDR497C	0.637631	0.268919	0.59644			YMR008C
YOR077W	1.00114	YLL018C	-0.497936	YDR007W	1.97745				YLR362W	0.511061	0.605639	0.59493			YPL060W
YER130C	1.00046	YIR002C	-0.757902	YDL195W	-0.734932				YBR046C	0.554415	0.990523	0.59482			YHR097C
YDL107W	1.00017	YOR377W	-1.31652	YCR067C	0.845469				YKL148C	0.563496	0.724607	0.592119			YOR347C
YMR280C	0.997685	YDR100W	1.04089	YCR066W	1.458				YDR511W	0.606485	0.752453	0.590763			YDR513W
YMR135C	0.997419	YCR053W	-0.58537	YER043C	-0.661721				YKL003C	0.516836	0.273996	0.590144			YLR206W
YLR288C	0.997392	YIL110W	-0.772063	YBR139W	0.975521				YBR225W	0.615899	0.705022	0.58981			YPL163C
YPL233W	0.997042	YOR201C	-0.761365	YCR024C	1.3729				YLR094C	0.504197	0.505774	0.586952			YDR306C
YOR185C	0.995256	YDL119C	0.938886	YOL139C	-0.660421				YDL194W	0.730361	0.486074	0.585592			YDR069C
YCR083W	0.993055	YPR163C	-0.526161	YDL055C	-0.638786				YGL056C	0.585266	0.813981	0.584107			YMR022W
YCL052C	0.986582	YNL247W	-0.701262	YDR343C	2.37193				YOR161C	0.900055	1.8076	0.583387			YOL108C
YDR379W	0.986122	YDR462W	0.88455	YLL060C	1.81043				YAR035W	0.896469	1.98206	0.58114			YJR110W
YHR150W	0.984671	YIL155C	1.10347	YBL039C	-0.722452				YDL024C	1.06852	1.29329	0.579867			YOR317W
YBR005W	0.983268	YMR230W	-0.513514	YPL092W	1.62539				YLR144C	0.647796	0.551824	0.578381			YKL048C
YDR078C	0.983146	YIL074C	-0.566074	YKL006W	-0.689168				YDL057W	0.812437	0.664336	0.577633			YJR052W
YOR036W	0.98297	YOR209C	-0.59018	YDR341C	-0.656914				YGL250W	0.602784	0.965592	0.575693			YMR158W
YCR071C	0.979091	YBR218C	-0.736679	YJL034W	-0.697531				YPL005W	0.647925	0.281113	0.574696			YOR125C
YDR265W	0.979042	YML088W	0.633618	YOR071C	-1.71489				YMR008C	0.488274	0.862339	0.57282			YOR052C
YMR137C	0.976157	YDR310C	-0.603629	YDR180W	-1.23256				YPL060W	0.611549	0.674154	0.572745			YPL110C
YGR133W	0.973834	YNR075W	-1.43214	YDL014W	-0.8833				YHR097C	0.714339	0.79556	0.570246			YER062C
YMR315W	0.973324	YFR015C	2.39676	YGR194C	1.49466				YOR347C	0.67387	1.48523	0.566606			YJL151C
YLR225C	0.971272	YLR172C	-0.565639	YDR342C	2.3624				YDR513W	0.754174	0.77235	0.566105			YAL060W
YCR082W	0.970789	YGR211W	-0.589076	YBR082C	-0.818466				YLR206W	0.551197	0.43975	0.565655			YPR093C
YDR523C	0.969992	YBR033W	1.81371	YML058W	-0.786249				YPL163C	0.537888	0.89623	0.565477			YDR041W
YLR125W	0.96783	YOR099W	-0.569088	YKL073W	-0.842539				YDR306C	0.68161	0.305828	0.558904			YMR152W
YJL013C	0.967628	YLR019W	0.692861	YLR017W	-1.11202				YDR069C	0.784425	0.290657	0.558823			YNR065C
YDR147W	0.965097	YPL229W	1.03735	YER138W-A	-1.30639				YMR022W	0.51778	0.666624	0.558308			YML057W
YNL329C	0.964981	YHL036W	1.08908	YPL134C	1.4377				YOL108C	0.511898	0.701985	0.555293			YGR205W
YBL078C	0.964726	YMR103C	1.37478	YER003C	-0.699673				YJR110W	0.712978	0.36748	0.548271			YDL149W
YER175C	0.963603	YOR323C	-0.486887	YPR114W	-0.976612				YOR317W	0.719469	1.161	0.546987			YER064C
YML099C	0.963485	YBR074W	-0.680303	YJR127C	1.1577				YKL048C	0.50131	0.609911	0.543687			YLR299W
YCL005W	0.962408	YFL037W	-0.542455	YGR289C	2.05135				YJR052W	0.652526	0.692071	0.541943			YLR093C
YPR196W	0.961742	YJL136C	-0.511062	YPR005C	1.69664				YMR158W	0.497774	0.484755	0.540928			YPL267W
YMR299C	0.961554	YJR143C	-0.634627	YLR395C	-1.00242				YOR125C	0.501159	0.442193	0.540546			YFR019W
YGR108W	0.959201	YPR042C	0.640363	YJL078C	-0.950633				YOR052C	0.72446	1.29127	0.539334			YGL110C
YDR119W-A	0.958664	YIL009W	-0.904635	YML100W	2.50278				YPL110C	0.644838	1.44382	0.538399			YHR138C
YNR065C	0.950477	YAL023C	-0.682226	YEL060C	1.01936				YER062C	0.662918	1.44607	0.535834			YPL176C
YGL134W	0.949909	YKL127W	-0.53768	YLL024C	-0.649133				YJL151C	0.584043	0.901278	0.534995			YLL023C
YER026C	0.948723	YML051W	-0.770122	YOR363C	1.32674				YAL060W	0.622514	0.76124	0.533814			YIL125W
YOR389W	0.948614	YDR127W	-0.647856	YOR350C	1.32537				YPR093C	0.610065	0.50269	0.532636			YGL227W
YPL264C	0.947174	YKL109W	0.875029	YKR077W	1.1341				YDR041W	0.534389	0.334688	0.532517			YMR031C
YNL200C	0.947069	YLR429W	-0.538822	YML050W	1.94935				YMR152W	0.51243	0.517394	0.53126			YLR423C
YOR192C	0.946674	YDR316W	0.795816	YOR253W	-1.10381				YNR065C	0.950477	0.331185	0.52731			YDL174C
YGL128C	0.946127	YPL244C	-0.946053	YHR188C	-0.835626				YML057W	0.550264	0.790405	0.522303			YFL024C
YBR203W	0.944273	YBR173C	0.664384	YFL049W	1.17891				YGR205W	0.551377	1.37156	0.521439			YJL084C
YCR065W	0.943493	YKL007W	0.74038	YPL237W	-0.800721				YDL149W	0.515458	0.877629	0.521348			YIL006W
YLL003W	0.943101	YDR516C	1.03604	YCL057W	0.707985				YER064C	0.61851	0.592389	0.51953			YGR080W
YNL036W	0.941904	YDL110C	1.39129	YKL220C	2.09665				YLR299W	0.522703	0.848267	0.518944			YBR001C
YGR109C	0.941306	YML026C	-0.503771	YNL241C	-0.716984				YLR093C	0.551844	0.418426	0.513951			YIL042C
YGR111W	0.939581	YHR132W-A	0.987905	YBR293W	1.48466				YPL267W	0.580972	0.718621	0.507776			YOR353C
YLR300W	0.939205	YGL141W	0.774854	YJR017C	-1.02766				YFR019W	0.652292	0.567344	0.507039			YER045C
YJL048C	0.937074	YER089C	-0.553722	YLR172C	-0.762767				YGL110C	0.482637	0.309205	0.504964			YNR006W
YCL047C	0.934037	YPL063W	-0.535451	YOL119C	0.918433				YHR138C	0.536366	1.42186	0.504516			YKL189W
YBR216C	0.928162	YLR229C	-0.541388	YCR053W	0.612488				YPL176C	0.589749	0.389968	0.50421			YGR048W
YCR046C	0.92772	YKL152C	-0.459131	YGR090W	-0.780767				YLL023C	0.480019	1.00115	0.503941			YLR392C
YJL005W	0.926502	YER036C	-0.727085	YOR294W	-1.00603				YIL125W	0.501036	0.338449	0.503632			YOR245C
YLR245C	0.923035	YIL111W	1.29498	YOL061W	-0.778962				YGL227W	0.499332	0.811672	0.503442			YPR200C
YBR047W	0.92302	YGL243W	-1.11884	YOR336W	-1.01464				YMR031C	0.495268	0.73266	0.500126			YJR033C
YPL052W	0.92245	YDL185W	-0.499258	YKL051W	1.4132				YLR423C	0.610719	0.401729	0.498557			YDR436W
YGR223C	0.921979	YIR038C	0.84535	YPL154C	0.664704				YDL174C	0.496887	0.307364	0.496502			YMR219W
YKL017C	0.919987	YOR118W	-0.790023	YIL013C	1.7893				YFL024C	0.525337	0.83935	0.49616			YBR204C
YHL048W	0.919539	YFR034C	-0.789026	YHL036W	1.58237				YJL084C	0.584522	0.690965	0.493211			YBR230C
YMR199W	0.917986	YLR166C	0.669711	YDR059C	1.58713				YIL006W	0.634956	0.495688	0.491842			YDR202C
YOR035C	0.917862	YBR115C	-0.622259	YLR345W	1.39346				YGR080W	0.516002	0.659611	0.490151			YOL113W
YGR238C	0.914069	YMR246W	-0.681813	YKR080W	0.995466				YBR001C	0.733891	0.284009	0.488098			YMR304W
YBR139W	0.913062	YMR210W	0.863078	YHL034C	-0.737623				YIL042C	0.524006	0.329704	0.487486			YAL062W
YER098W	0.91093	YGL191W	0.685061	YBR065C	1.30675				YOR353C	0.592269	0.34583	0.4838			YMR174C
YKL121W	0.908554	YKL217W	2.01196	YCL011C	0.698188				YER045C	0.496764	0.764286	0.479368			YDL139C
YHR006W	0.908093	YBL101C	0.645972	YGL251C	1.51213				YNR006W	0.57874	0.312303	0.478151			YMR251W-A
YOL119C	0.907877	YCL021W-A	-1.46608	YLR318W	1.90198				YKL189W	0.660696	0.432154	0.477225			YDR038C
YKR078W	0.906918	YLR188W	-0.783086	YCR019W	1.48183				YGR048W	0.488799	0.580122	0.471583			YNL020C
YOR219C	0.906319	YKR050W	-0.867499	YHL035C	1.3709				YLR392C	0.498112	0.527523	0.471434			YER088C
YMR294W	0.904749	YHR016C	1.02095	YML056C	-0.591228				YOR245C	0.521009	0.341256	0.463438			YML027W
YHR048W	0.904155	YLL024C	-0.530928	YIL074C	-0.789079				YPR200C	0.718048	1.03869	0.461346			YPL155C
YML117W	0.904091	YFR020W	-1.80986	YBR221C	-0.703882				YJR033C	0.605012	0.269449	0.459623			YLR120C
YPL149W	0.902702	YGR244C	0.74704	YCR038C	1.71156				YDR436W	0.485925	0.502798	0.455857			YGR087C
YDR381C-A	0.902438	YML080W	-0.790343	YJL111W	-0.702956				YMR219W	0.502414	0.961492	0.44468			YPL221W
YDL176W	0.902293	YIL114C	-0.806334	YDR002W	-0.761064				YBR204C	0.508741	0.509362	0.442401			YJL016W
YMR204C	0.901798	YCR059C	-0.670353	YKL201C	1.33519				YBR230C	0.616159	1.0271	0.440582			YNL053W
YOR383C	0.90084	YJR123W	-0.508252	YIR042C	1.9074				YDR202C	0.500287	0.284146	0.435906			YER081W
YOR026W	0.900671	YOR101W	-0.775498	YBR132C	1.2159				YOL113W	0.717474	0.547287	0.43569			YDR104C
YOR161C	0.900055	YNL200C	1.27785	YKL014C	-0.803081				YMR304W	0.510845	0.715936	0.422149			YNL146W
YAR035W	0.896469	YOR136W	0.566321	YKL106W	-1.03231				YAL062W	0.802451	2.1309	0.420535			YPR157W
YOR127W	0.896075	YPL125W	-0.656932	YIL169C	1.90601				YMR174C	0.706151	2.27438	0.407748			YMR136W
YBR138C	0.895447	YER025W	-0.482274	YDL110C	1.14594				YDL139C	0.611932	0.670222	0.404838			YJL099W
YML068W	0.895159	YER019C-A	-0.636694	YOR270C	-0.68708				YMR251W-A	0.740078	1.38935	0.401517			YLR307W
YHR080C	0.894908	YLR432W	-0.687002	YOR204W	-0.623992				YDR038C	0.591655	0.716082	0.399497			YPL067C
YJL159W	0.894152	YCL049C	0.736075	YNL292W	-1.06416				YNL020C	0.507752	0.487008	0.394195			YJR119C
YPL109C	0.893665	YHR188C	-0.737489	YER117W	-0.789237				YER088C	0.701951	0.43073	0.393655			YNL195C
YHR142W	0.893549	YJL158C	0.56954	YNL097C-B	-5.43811				YML027W	0.48559	0.828268	0.391182			YGR143W
YJL065C	0.890525	YML104C	-0.898705	YKL192C	-0.82895				YPL155C	0.491044	0.275318	0.391068
YER109C	0.890408	YDR210W	-0.595587	YIL126W	-0.809235				YLR120C	0.611583	1.10249	0.38024
YPL003W	0.889674	YPL089C	0.675982	YDR421W	1.32032				YGR087C	1.13191	2.50741	0.377286
YOR220W	0.889667	YJL036W	0.689123	YML051W	-1.28639				YPL221W	0.667119	0.412135	0.372683
YOR066W	0.887807	YJL117W	-0.505864	YBL074C	1.64184				YJL016W	0.498843	0.266493	0.369947
YKL098W	0.886739	YLR078C	-0.729044	YGR159C	-0.926352				YNL053W	0.657373	0.723547	0.365778
YCR067C	0.885676	YBL015W	0.603249	YHR163W	-0.851364				YER081W	0.590398	0.708493	0.360916
YAL053W	0.882527	YCR008W	-0.635761	YIR006C	-0.689882				YDR104C	0.530372	0.31359	0.341919
YOL055C	0.881711	YMR216C	0.577779	YPL230W	2.14563				YNL146W	0.558815	0.818774	0.330642
YKR022C	0.881644	YFR053C	2.69744	YPR170W-B	-0.904168				YPR157W	0.764523	0.492682	0.312636
YNL314W	0.881127	YKL211C	-0.612063	YOR060C	1.50505				YMR136W	0.593367	0.801667	0.303257
YBR228W	0.881088	YIL083C	-0.645543	YOR005C	1.49832				YJL099W	0.507292	0.472619	0.296262
YER066W	0.880148	YGR123C	-0.773209	YLL041C	1.08533				YLR307W	0.804802	0.323444	0.293188
YMR124W	0.879516	YDL141W	-0.639255	YMR278W	0.997652				YPL067C	0.608561	0.37569	0.287024
YER035W	0.878588	YBR145W	-0.904773	YDR170C	-0.661002				YJR119C	0.519683	0.483763	0.284122
YCR077C	0.878082	YGL022W	-0.670716	YAL053W	0.772768				YNL195C	0.661367	0.990804	0.266967
YBR217W	0.878074	YOL103W	-0.779898	YDR530C	1.28946				YGR143W	0.520663	0.637563	0.262663
YJL049W	0.876617	YER044C	-0.665084	YBL020W	-1.10019				YPL014W	0.581328	0.463555	0.256494
YGR189C	0.875985	YIL020C	-0.691971	YOR182C	-0.774471				YGL081W	0.730622	0.340864	0.222122
YOR136W	0.873734	YPR154W	0.872964	YBL081W	-1.21915				YLR054C	0.707594	1.10438	0.201915
YCL014W	0.871618	YBR225W	0.705022	YNL145W	-11.636				YFL033C	0.490657	0.274148	0.188835
YPL247C	0.869882	YHR128W	-0.660252	YCR094W	0.909165				YGR023W	0.568605	0.805596	0.0480793
YBR241C	0.86903	YLR151C	1.45947	YDR060W	-0.722269				YNL036W	0.941904	1.39384	0.0146736
YDR316W	0.868894	YMR176W	-0.773503	YOR173W	1.9733				YPR015C	0.702764	0.752626	-0.107597
YMR064W	0.868747	YNL080C	-0.861942	YOL082W	1.20317				YNR040W	0.545746	0.258183	0.611826
YPL248C	0.868346	YFL024C	0.83935	YOL059W	-0.790212				YOL086W-A	0.674868	0.25807	0.572322
YIL009C-A	0.868014	YMR204C	1.00671	YER184C	1.66037				YOR023C	0.683826	0.258018	0.635214
YDL216C	0.867444	YPR001W	1.56115	YMR038C	-0.819051				YLL060C	2.06888	0.25767	1.81043
YJR107W	0.867443	YDR536W	3.48259	YLR447C	-0.692757				YDL107W	1.00017	0.256823	1.15261
YPL151C	0.866022	YLR108C	-1.11247	YCR082W	0.985669				YDL244W	2.06594	0.25641	1.90461
YDR336W	0.863566	YDR341C	-0.577757	YDR358W	1.14818				YLR417W	0.529339	0.256169	0.281799
YOL016C	0.862713	YER042W	-0.626523	YKL216W	-0.713362				YCR095C	1.21256	0.254699	1.30864
YMR167W	0.861613	YOR035C	0.6392	YJL002C	-0.742967				YHR161C	0.656425	0.253795	0.582833
YPL026C	0.859557	YMR197C	0.853439	YDR345C	-0.863551				YPL144W	0.792005	0.253158	0.968879
YOL011W	0.857529	YDR295C	0.611448	YDL109C	1.58907				YCL034W	1.06149	0.251964	1.12567
YGR287C	0.856187	YPL087W	0.762118	YER024W	1.65411				YKR009C	1.18815	0.251803	1.0762
YPR046W	0.855698	YDL131W	-0.629999	YDR471W	-0.665222				YLR355C	0.66891	0.249104	0.724807
YDR453C	0.854978	YGR256W	1.56197	YOL157C	1.84987				YDR379W	0.986122	0.243536	1.0358
YGL247W	0.854926	YBR016W	0.633484	YJR147W	-1.28414				YKL168C	1.1658	0.24253	1.11813
YKR080W	0.852655	YKL010C	0.558721	YDL130W-A	1.35681				YFL049W	1.18789	0.235074	1.17891
YCR020C-A	0.849431	YLR370C	0.568123	YNL255C	-0.67228				YNL009W	0.728184	0.234743	0.861971
YPR134W	0.849026	YBR230C	1.0271	YGL121C	2.80475				YDR315C	0.55771	0.234339	0.387198
YFR014C	0.848463	YMR220W	-0.54056	YGL039W	-1.09532				YIR005W	1.04638	0.233497	1.27009
YKR077W	0.847897	YJR097W	0.961749	YKL001C	-1.0768				YOR354C	0.58155	0.231343	0.694809
YCL008C	0.847433	YPL215W	0.648753	YDL201W	-0.90719				YCR066W	1.52603	0.228661	1.458
YBR126C	0.847079	YPL154C	0.643888	YHR145C	-1.33378				YMR155W	0.675327	0.22442	0.584154
YHR194W	0.846972	YNL053W	0.723547	YCR063W	1.36241				YMR293C	1.16797	0.223697	1.31417
YPR201W	0.846456	YLR002C	-0.802613	YNL294C	1.07836				YNL011C	1.17844	0.222843	1.19826
YDR130C	0.846242	YMR026C	-0.849101	YER156C	-0.78968				YOL117W	1.18165	0.221032	0.977953
YJL103C	0.846242	YAL012W	-0.502776	YKL165C	-0.87932				YOL119C	0.907877	0.219243	0.918433
YBL029C-A	0.845856	YMR303C	-0.426566	YKR097W	2.54028				YGR223C	0.921979	0.218169	0.669254
YGL240W	0.845807	YNL248C	-0.715696	YBR256C	0.84461				YGL021W	0.595731	0.21515	0.529343
YOR018W	0.843419	YMR053C	1.28802	YGL122C	-0.777282				YPL111W	1.33139	0.210665	1.36308
YMR156C	0.843283	YHR171W	0.970445	YDR310C	-0.866498				YGR045C	1.39566	0.208441	1.05311
YOL032W	0.842439	YPR086W	-0.614619	YOR289W	2.14196				YGL036W	0.570849	0.207657	0.397308
YLR270W	0.84167	YEL048C	-0.927019	YAL007C	-0.926482				YIR042C	1.85183	0.207602	1.9074
YDR022C	0.840772	YLL061W	-0.617144	YMR114C	1.74899				YBR108W	0.577894	0.206912	0.595735
YCR004C	0.840233	YER049W	-0.802259	YCR046C	1.0247				YPL164C	1.19009	0.205676	1.04349
YLL051C	0.839914	YBL061C	0.500514	YPR035W	-0.664226				YML076C	0.819896	0.204866	0.618687
YAL017W	0.837259	YMR100W	0.642019	YFR015C	2.63628				YJL005W	0.926502	0.203971	0.728994
YER033C	0.837068	YGL205W	2.79499	YBL075C	1.52194				YOR292C	1.00781	0.202663	1.06906
YKR027W	0.836227	YGR024C	-0.842162	YIR030C	-2.4022				YOR064C	0.676238	0.201826	0.892262
YNL037C	0.836179	YDR163W	0.849282	YIL117C	0.895922				YJL147C	0.486292	0.201516	0.430063
YDR223W	0.835999	YAL042W	-0.616959	YOR062C	2.14006				YPR127W	0.501653	0.2015	0.454568
YOL138C	0.835572	YGL006W	0.562928	YDL243C	1.85399				YHR119W	0.550981	0.200796	0.466801
YJL213W	0.835407	YDL073W	-0.763137	YHL039W	-0.86776				YIL120W	1.5117	0.19465	1.42641
YNL143C	0.835129	YGL142C	-0.784333	YPL089C	1.07672				YKL219W	0.72917	0.194338	0.848041
YDR256C	0.834961	YJL111W	-0.513888	YPR128C	-1.11499				YGL124C	0.65121	0.191533	0.546085
YDL049C	0.834516	YOR182C	-0.512327	YJR007W	-0.689347				YCR086W	1.03432	0.191173	1.16834
YOL071W	0.834473	YLL009C	0.885069	YKL024C	-0.807491				YIR016W	1.34579	0.190386	1.19232
YDR125C	0.83357	YNR010W	0.929961	YIL039W	-0.764157				YOR357C	0.790962	0.190276	0.853458
YBR256C	0.833459	YKL033W-A	-0.486101	YOR205C	1.11945				YBR188C	0.509538	0.18972	0.609031
YCR009C	0.833445	YLR325C	-0.460162	YBR006W	1.39198				YDL200C	0.651791	0.189472	0.724667
YDR314C	0.83303	YLR254C	0.960807	YGR239C	1.22417				YDL214C	0.694663	0.189149	0.395689
YGR288W	0.832888	YOL022C	-0.629095	YBR162W-A	-1.02173				YKR080W	0.852655	0.189112	0.995466
YGR278W	0.829631	YGR178C	-0.69888	YKL210W	-0.749972				YCR024C	1.50865	0.1885	1.3729
YKL062W	0.828956	YKL087C	0.898943	YGL092W	-0.730519				YDR131C	1.07535	0.187717	0.970135
YJL107C	0.828086	YDL090C	-0.953251	YLR266C	1.50267				YDR319C	0.78942	0.187568	0.797762
YJR136C	0.827517	YGL228W	-0.497666	YJL117W	-0.789358				YNL294C	1.26605	0.18506	1.07836
YLR457C	0.827264	YHR152W	0.77971	YGR181W	-1.13825				YIR025W	0.719041	0.183439	0.792794
YNL249C	0.826785	YMR189W	0.694401	YML117W	0.752123				YPR199C	0.547426	0.18316	0.506939
YBR262C	0.824996	YHR206W	-0.660178	YPR133W-A	-1.15258				YIL130W	0.515943	0.181964	0.393081
YBR068C	0.823324	YNR002C	2.40708	YBR270C	1.87542				YJR127C	1.4301	0.181111	1.1577
YML005W	0.821905	YOL086C	-0.437971	YJL001W	-0.75164				YMR299C	0.961554	0.17528	0.882124
YGR015C	0.821822	YPL064C	-0.842715	YLR449W	-0.673267				YDR384C	0.511267	0.172683	0.711629
YGR092W	0.821756	YIL064W	-0.85596	YNL216W	-0.774165				YBR077C	0.575821	0.171423	0.562272
YJR106W	0.821398	YFR055W	-0.470494	YMR209C	-1.18967				YHR159W	0.526734	0.163696	0.545072
YGL131C	0.821075	YER162C	0.846577	YDL072C	0.750943				YCR061W	0.552978	0.16367	0.324985
YML076C	0.819896	YDL022W	1.20516	YGL148W	-0.708608				YLR085C	0.512094	0.162851	0.460739
YIL124W	0.819523	YEL012W	0.878887	YOL058W	0.746994				YGL095C	0.526727	0.162445	0.522588
YJL108C	0.818878	YOR039W	-0.515525	YBR053C	1.0631				YBR114W	0.617497	0.161489	0.484902
YGR057C	0.818347	YMR243C	-0.720801	YGL022W	-0.643077				YOR244W	0.641513	0.160819	0.705906
YPL222W	0.818221	YNL190W	-0.566401	YOL109W	-0.541072				YDL230W	0.491107	0.158397	0.208023
YBL080C	0.81798	YMR227C	0.692897	YAR002C-A	-0.719779				YJR156C	1.90633	0.15795	1.78708
YOR137C	0.81774	YOR271C	-0.602212	YOR361C	-0.579221				YJR059W	0.579431	0.155707	0.429854
YOR031W	0.817179	YOL082W	0.860265	YIL050W	1.11851				YBR156C	0.490845	0.154709	0.415187
YLR247C	0.816806	YEL002C	-0.475781	YCL012C	1.40403				YBR237W	1.02457	0.153686	1.07246
YCR075W-A	0.816353	YJL197W	-0.598679	YFL005W	-0.716198				YJL204C	0.532509	0.151456	0.422584
YDR525W-A	0.815964	YGL099W	-0.802937	YKL151C	1.30638				YKR101W	0.804622	0.151162	0.764025
YMR154C	0.815887	YGR212W	-1.45439	YDR428C	-1.16159				YEL028W	0.587204	0.150703	0.253703
YML120C	0.815248	YBR007C	0.632906	YAL035W	-0.561274				YHR180W	1.51315	0.150477	1.37752
YOR080W	0.81519	YLL057C	1.68721	YOL164W	1.5561				YIR014W	1.41082	0.148756	1.26501
YPL189C-A	0.814608	YKL104C	0.5387	YJR156C	1.78708				YMR056C	1.53494	0.14874	1.36865
YLR273C	0.813506	YLR262C-A	-0.561093	YLR126C	-1.50741				YCR027C	0.620078	0.148394	0.552445
YKL087C	0.813046	YML022W	-0.582707	YHL001W	-0.601237				YLL025W	1.04487	0.146741	0.70871
YHL032C	0.812842	YMR055C	0.92704	YDL205C	-0.895211				YGR046W	0.498279	0.146193	0.504114
YDL057W	0.812437	YBR230W-A	1.18072	YKR043C	-0.642035				YHR067W	0.809398	0.143877	0.686252
YNL012W	0.811851	YHR179W	-0.557242	YLR380W	-0.857913				YER184C	1.81791	0.142661	1.66037
YEL016C	0.810756	YOR210W	-0.522188	YBR105C	1.40826				YDR371W	0.778913	0.13937	0.764855
YHR067W	0.809398	YDR336W	-1.15906	YNL329C	0.933193				YMR199W	0.917986	0.13909	0.812367
YBL113C	0.809305	YDR358W	1.07786	YLR120W-A	-5.84102				YDR530C	1.31394	0.138642	1.28946
YKR075C	0.808693	YPR145C-A	2.25711	YER044C	-0.950668				YFL055W	1.63149	0.138498	1.38805
YDR005C	0.807195	YMR139W	0.739405	YEL051W	-0.756332				YMR020W	0.527002	0.13823	0.354453
YBR037C	0.807084	YPR134W	1.04212	YLR185W	-0.725584				YHL023C	0.537587	0.134968	0.512246
YDR191W	0.806881	YGR142W	0.746548	YKL091C	1.31972				YIL071C	1.07295	0.134816	1.07476
YHR198C	0.805812	YGR143W	0.637563	YDR300C	-0.942519				YJR106W	0.821398	0.134111	0.872909
YLR307W	0.804802	YBR126C	1.02697	YLR225C	1.02709				YOR152C	0.662455	0.133962	0.589625
YKR101W	0.804622	YDR045C	-0.799955	YMR293C	1.31417				YDR137W	0.599317	0.132789	0.520679
YAL062W	0.802451	YDR170C	-0.435838	YOR168W	-0.555867				YNL104C	0.499445	0.132465	0.425673
YPL213W	0.801921	YDR296W	0.625427	YPR124W	-1.7864				YMR201C	0.640283	0.132421	0.629206
YDR435C	0.798336	YMR261C	0.606009	YOL048C	1.41911				YJL108C	0.818878	0.129893	0.449752
YMR316C-B	0.79778	YDL203C	-0.64732	YLR409C	-0.782332				YLR246W	1.29098	0.129382	1.27436
YJL082W	0.795649	YOR062C	1.35274	YPR009W	-1.6343				YKR078W	0.906918	0.128334	0.921189
YOR003W	0.793217	YLR372W	-0.689652	YIL121W	-1.4721				YJR021C	1.33781	0.127135	1.40797
YPL144W	0.792005	YGL096W	1.94412	YHL048W	0.921972				YLR382C	0.51463	0.126608	0.56984
YCR088W	0.791142	YML085C	-0.482932	YDR120C	-0.711413				YDR196C	0.58598	0.124765	0.599258
YCR090C	0.790972	YJL183W	-0.633194	YOL123W	-0.640766				YDL087C	0.528475	0.123521	0.477666
YOR357C	0.790962	YKL201C	0.820144	YCR065W	0.778401				YCR054C	1.41755	0.123139	1.47468
YJL066C	0.790083	YKL166C	-0.663541	YDL022W	1.50293				YCL051W	1.05712	0.122847	0.877679
YDR319C	0.78942	YFR028C	-0.561027	YDR379W	1.0358				YDR499W	0.702225	0.120292	0.730776
YOR155C	0.789329	YPL028W	-0.432417	YDR231C	1.2181				YLR451W	0.494237	0.120234	0.329293
YOL158C	0.789224	YBL029C-A	1.20348	YBR126C	0.831794				YJR100C	0.73234	0.118233	0.794644
YNL223W	0.789109	YPR048W	-0.771994	YNL313C	-0.743666				YLR454W	0.564901	0.117104	0.495363
YDL072C	0.788219	YDR080W	0.565728	YAL063C	1.53895				YCR076C	1.7422	0.116935	1.70265
YGL185C	0.788003	YEL037C	-0.59118	YKL050C	1.59417				YLR010C	2.28422	0.116541	2.28285
YDL210W	0.786376	YOR226C	0.765772	YKL128C	-1.01463				YGL059W	1.15184	0.113964	0.983066
YLR098C	0.785599	YGR085C	-0.442401	YOR037W	1.22962				YCR046C	0.92772	0.1136	1.0247
YOR368W	0.784801	YPR051W	0.624917	YDR093W	-0.673183				YDR357C	0.551748	0.113536	0.52439
YAL002W	0.784642	YDR361C	-0.654604	YDR245W	-0.779304				YOR383C	0.90084	0.112316	0.528395
YDR069C	0.784425	YIL017C	0.754624	YLR256W	-0.649427				YDR350C	1.3741	0.111993	1.23891
YBR098W	0.784033	YLR312C	2.21239	YDR147W	1.0775				YMR164C	0.54884	0.111949	0.459177
YER162C	0.782802	YDR461C-A	1.28583	YDR352W	-1.04228				YMR167W	0.861613	0.107504	0.65964
YCR028C	0.781814	YPR148C	0.502199	YKL205W	-0.816237				YDL020C	0.763578	0.106028	0.519775
YCR094W	0.781186	YOR198C	-0.57235	YPL022W	0.858999				YMR253C	0.766325	0.105844	0.62825
YDR109C	0.780713	YER078C	-0.654608	YER089C	-0.645939				YML068W	0.895159	0.101318	0.873013
YJL093C	0.779856	YGL257C	-0.774004	YPL148C	2.08492				YOR328W	1.91956	0.091856	1.73859
YPL219W	0.779181	YOR246C	-0.589938	YGL248W	1.18422				YCR038C	1.69236	0.0915662	1.71156
YDR371W	0.778913	YNL093W	2.70256	YNL011C	1.19826				YGL131C	0.821075	0.0910787	0.557294
YPR082C	0.7781	YMR041C	0.811378	YKL087C	1.00134				YPR111W	0.630184	0.090123	0.610936
YBL091C-A	0.777746	YGR097W	0.679665	YNL144C	1.81666				YOR005C	1.48609	0.086641	1.49832
YGL006W	0.775758	YJL019W	-0.679596	YDR091C	-0.646276				YIL066C	2.16404	0.0853191	1.83287
YJL162C	0.77563	YCR048W	-0.677858	YLR303W	-0.750851				YCL016C	1.62427	0.0851672	1.61291
YNL115C	0.775051	YJL066C	0.985971	YMR183C	-0.747228				YJR136C	0.827517	0.0802022	0.784197
YLR035C	0.771604	YLR362W	0.605639	YJR155W	2.1373				YPL177C	0.509831	0.0800306	0.483191
YOL122C	0.770966	YLR378C	-0.542678	YML115C	-0.757065				YAL027W	0.534482	0.0775477	0.361316
YKL090W	0.770764	YBR211C	0.835194	YJL145W	-0.855969				YKR027W	0.836227	0.0762506	0.807615
YIL087C	0.77061	YJL166W	0.703728	YHR136C	-1.02198				YAL037W	1.06464	0.0756224	1.18462
YMR068W	0.770459	YLR144C	0.551824	YKR081C	-0.817621				YDR406W	1.8312	0.0752243	1.57687
YHL014C	0.769993	YLR293C	-0.405	YJL132W	1.45706				YGR222W	1.23775	0.0732875	1.15018
YDL113C	0.769157	YMR022W	0.666624	YLR301W	-0.826337				YOR127W	0.896075	0.0718617	0.7918
YLR080W	0.76652	YAR003W	-0.694629	YPR052C	-0.848783				YLR453C	1.57832	0.0717284	1.48383
YMR253C	0.766325	YIL090W	-0.91151	YKL222C	1.44224				YFR007W	0.534536	0.0708428	0.554504
YOR030W	0.765006	YPR023C	-0.571784	YOL159C	1.50845				YLR245C	0.923035	0.0694301	0.616753
YPR157W	0.764523	YCR003W	0.65537	YEL021W	-0.780085				YDR268W	0.621265	0.068547	0.505342
YDR030C	0.76452	YBR158W	0.511824	YBR262C	1.03164				YER044C-A	2.60295	0.0665667	2.35486
YGL045W	0.764506	YER113C	-0.713877	YBL060W	1.23882				YJL107C	0.828086	0.0645962	0.622432
YDR185C	0.764418	YER095W	0.637665	YMR096W	1.37484				YCR032W	1.4896	0.062339	1.31364
YGR258C	0.763703	YBR203W	0.694313	YFR030W	-0.711107				YDR005C	0.807195	0.0603123	0.814562
YDL020C	0.763578	YJL003W	0.822701	YGR111W	0.865672				YBL019W	1.26045	0.0599833	1.23134
YPL236C	0.760514	YLR084C	-0.574869	YPL117C	-0.637472				YGL146C	1.63644	0.0566526	1.51683
YGL141W	0.759953	YLR064W	0.579427	YBR214W	1.22724				YDR130C	0.846242	0.0557982	0.92269
YDR309C	0.758537	YML041C	0.762008	YLR289W	1.25163				YER039C	1.7429	0.054166	1.54271
YKL045W	0.758374	YOR051C	-0.658422	YLR244C	-0.658086				YCR037C	2.28416	0.0537835	2.11111
YHL046C	0.75832	YBR030W	-0.918693	YDL085C-A	-1.69647				YKL187C	1.73971	0.051674	1.32247
YCL057W	0.758276	YDR425W	0.69995	YPL214C	1.09453				YNL172W	0.540964	0.0512902	0.374866
YCR092C	0.757423	YGR146C	0.648212	YPR010C	-0.556873				YMR302C	0.48155	0.0508275	0.527532
YDL233W	0.755414	YBR121C	-0.523067	YMR290C	-0.682304				YJR108W	0.745059	0.0489541	1.00077
YOL107W	0.755237	YMR256C	0.686635	YPL064C	1.13791				YDR124W	1.32887	0.0482379	1.24542
YOL023W	0.754836	YFL022C	-0.513743	YOR209C	-0.723081				YPL066W	1.64768	0.0472602	1.68042
YHR105W	0.754538	YHR072W-A	-0.584059	YPL218W	-0.638009				YNL083W	0.639728	0.0434846	0.708499
YPL150W	0.754362	YKL176C	-0.723939	YMR103C	1.92761				YPL241C	0.544246	0.0422345	0.522803
YDR513W	0.754174	YOL102C	-0.867434	YIL066C	1.83287				YIL152W	0.696959	0.0412671	0.797378
YIL084C	0.754143	YGL203C	-0.528998	YGL089C	4.52314				YDR314C	0.83303	0.0410735	0.719486
YDR254W	0.753905	YBR182C	0.972458	YIL077C	1.34793				YFL057C	3.02891	0.0395549	2.61437
YDL183C	0.75259	YDL052C	-0.55838	YOR091W	-0.82567				YPL148C	2.15504	0.0371622	2.08492
YLR360W	0.752349	YDR453C	1.29417	YNL247W	-0.602973				YCR019W	1.40177	0.0359889	1.48183
YAL015C	0.750783	YDR122W	0.649964	YHR049W	-0.754874				YCR073W-A	1.0135	0.0317243	1.11862
YDR031W	0.750757	YIL097W	0.97493	YBR143C	-0.60305				YIL116W	0.671611	0.0304289	0.656031
YPL133C	0.749445	YDR031W	1.17651	YGL243W	1.25685				YOR365C	1.6692	0.0276576	1.70747
YER180C	0.74937	YMR085W	1.99013	YNL061W	-0.649868				YGL073W	0.59045	0.0267046	0.527057
YAL034C	0.749346	YNR009W	0.678914	YLR267W	2.36885				YKR075C	0.808693	0.0262863	0.814907
YDR179C	0.748046	YDR508C	-0.412679	YNL280C	-0.749788				YLR360W	0.752349	0.0233898	0.67434
YBR258C	0.746618	YBL041W	0.598482	YJR060W	-0.834641				YAL063C	1.74038	0.0222408	1.53895
YDR370C	0.746276	YNL095C	-1.25473	YLR010C	2.28285				YCL031C	0.654765	0.0160496	0.662742
YKR103W	0.746198	YNR030W	-0.597333	YMR199W	0.812367				YOR350C	1.32156	0.0156044	1.32537
YGL010W	0.745179	YML004C	0.602536	YHR099W	-0.609523				YDR236C	0.688898	0.0154323	0.832063
YJR108W	0.745059	YER064C	0.592389	YBR049C	-0.724122				YKR021W	0.69971	0.00751469	0.67892
YMR066W	0.743636	YML129C	0.738389	YMR307W	-0.51921				YKR029C	0.51069	0.0069356	0.418212
YKR011C	0.742678	YER087C-B	-0.460348	YLL008W	-0.766083				YER116C	0.51053	0.00445989	0.531414
YOR148C	0.742313	YEL055C	-0.756558	YIR007W	1.27086				YBR184W	1.40026	0.00360518	1.4502
YKR069W	0.741758	YJL044C	-0.761435	YER173W	1.23255				YOL148C	0.548323	-0.00132968	0.574505
YHR171W	0.741108	YMR296C	-0.721325	YPL063W	-0.693538				YCR067C	0.885676	-0.00197098	0.845469
YMR251W-A	0.740078	YNL100W	0.685768	YLR200W	-1.00995				YOL023W	0.754836	-0.00240756	0.944068
YDR013W	0.739863	YPR080W	-0.414512	YIL111W	1.37543				YJR035W	0.710095	-0.00354279	0.62087
YBR182C	0.739245	YPL169C	-0.495204	YKL212W	-0.602613				YER179W	0.662695	-0.00415116	0.41626
YIL092W	0.737071	YDR441C	-0.812503	YBR218C	-0.562481				YIR023W	0.731283	-0.0044421	0.708944
YER037W	0.736523	YKL004W	-0.826595	YGR254W	-0.727174				YIR034C	0.517825	-0.00571526	0.64778
YBR024W	0.736152	YPL070W	0.636979	YAL042W	-0.662148				YDR125C	0.83357	-0.00831309	0.718242
YLR201C	0.734796	YKL013C	0.589008	YLR002C	-0.747026				YOR180C	0.631814	-0.00879192	0.582254
YJR109C	0.734501	YBR283C	-0.495229	YNL095C	-1.54196				YOR319W	0.536378	-0.0103777	0.524204
YBR001C	0.733891	YPL086C	-0.634334	YDR386W	1.4444				YPL269W	0.500029	-0.0130571	0.526492
YGL212W	0.733349	YHL001W	-0.458073	YDR316W	1.02323				YNL329C	0.964981	-0.0131453	0.933193
YJR100C	0.73234	YBR118W	-0.411681	YOR162C	1.18214				YMR137C	0.976157	-0.0133096	1.08333
YLR254C	0.731324	YML086C	-0.42275	YOR381W	1.59375				YBR020W	1.50306	-0.0171579	1.40661
YIR023W	0.731283	YIL045W	1.07442	YBL076C	-0.592723				YDR147W	0.965097	-0.0207381	1.0775
YCL011C	0.730834	YBR104W	-0.811617	YPL085W	-0.595071				YMR097C	0.691164	-0.0221562	0.599755
YGL081W	0.730622	YHR142W	0.620652	YDL051W	-0.705518				YPL024W	1.10345	-0.0253363	0.941528
YDL194W	0.730361	YOR047C	0.606145	YGR108W	0.878585				YCR017C	1.00729	-0.0256248	1.06116
YKL219W	0.72917	YLR332W	0.565367	YOR056C	-0.771534				YMR066W	0.743636	-0.0266696	0.82949
YBL106C	0.729152	YPR151C	1.24023	YPL227C	-0.996335				YGR270W	0.502419	-0.0274729	0.412831
YNL009W	0.728184	YBR290W	0.737829	YKL068W	-0.710677				YOL003C	0.508751	-0.0285028	0.534634
YER188W	0.7277	YCR012W	-0.46254	YDL145C	-0.560237				YDR227W	0.483537	-0.0350097	0.412683
YPL272C	0.727331	YDR279W	-0.658519	YBL088C	0.820982				YJR153W	1.47123	-0.035532	1.66434
YEL025C	0.726437	YDR381W	-0.629741	YIL038C	-0.681294				YIR032C	0.619357	-0.0380225	0.555581
YGR235C	0.726173	YKL107W	2.1058	YDR085C	1.1345				YOL011W	0.857529	-0.0388672	0.721092
YOR052C	0.72446	YOR002W	-0.577662	YLR263W	1.84624				YLR288C	0.997392	-0.0402113	1.05499
YDL017W	0.72132	YIL139C	-1.19385	YOR323C	-0.569482				YGL247W	0.854926	-0.0431312	0.999318
YJL058C	0.721012	YPR016C	0.564981	YKL172W	-0.712618				YOR363C	1.3804	-0.0443226	1.32674
YPR061C	0.720862	YLR205C	0.856326	YGL027C	-0.671996				YBR278W	0.603898	-0.0465129	0.704606
YOR317W	0.719469	YBR052C	0.845636	YER086W	-0.603244				YDL173W	0.502007	-0.0481721	0.735629
YIR025W	0.719041	YOR222W	-0.947802	YJL171C	-0.635746				YDL077C	0.53219	-0.0503462	0.557938
YPR200C	0.718048	YBR280C	0.888673	YGR235C	0.854143				YOR162C	1.28049	-0.0507769	1.18214
YOL113W	0.717474	YBR078W	-0.378358	YNR021W	-0.723345				YPL274W	0.56621	-0.0512001	0.399556
YPL068C	0.715704	YCR011C	0.45235	YGR177C	-0.845221				YJR135C	1.22341	-0.0514622	1.25436
YHR097C	0.714339	YPL193W	-0.756204	YPR007C	3.59141				YHR106W	0.560998	-0.0519785	0.435037
YJL070C	0.714276	YLR228C	-0.710533	YPR073C	-1.04618				YMR278W	1.0961	-0.0520567	0.997652
YGL223C	0.713711	YHR089C	-0.557988	YFR034W-A	-2.56478				YOR031W	0.817179	-0.0551852	0.694992
YNR034W	0.713514	YIL162W	1.13981	YKR042W	-0.711569				YLR306W	0.655402	-0.0556166	0.757932
YJR110W	0.712978	YJL192C	-0.586686	YEL070W	3.21616				YHL035C	1.70531	-0.0567949	1.3709
YGR161W-C	0.712253	YLR399C	-0.737101	YJR010C-A	-1.27408				YDR293C	0.702735	-0.0621049	0.512911
YIL161W	0.711459	YDR062W	-0.563777	YBR058C-A	-1.21986				YKL220C	2.30328	-0.0632874	2.09665
YMR194C-B	0.710161	YMR307W	-0.428687	YCL021W-A	-1.98676				YER159C	0.556865	-0.0639965	0.800562
YJR035W	0.710095	YDL106C	0.754494	YJR154W	1.92019				YML005W	0.821905	-0.0642273	0.696034
YLR054C	0.707594	YBR276C	-0.694325	YJL172W	-0.615002				YDR490C	0.698243	-0.064905	0.651234
YJL126W	0.706764	YBR187W	-0.5794	YNR018W	-0.703904				YOL112W	1.05582	-0.0660984	0.959958
YMR174C	0.706151	YJR147W	-1.15165	YIL078W	-0.521168				YOR030W	0.765006	-0.0677214	0.621505
YPL004C	0.703756	YLR441C	-0.427672	YER006W	-0.692286				YCL052C	0.986582	-0.073506	0.980455
YMR110C	0.703357	YKR049C	0.98753	YMR305C	-0.61341				YLL063C	1.57689	-0.0787463	1.34761
YMR073C	0.703285	YCR091W	1.18736	YHR133C	-0.833109				YNL125C	1.51702	-0.0801371	1.37431
YPR015C	0.702764	YGR110W	1.18943	YJL065C	0.989384				YOL100W	1.01288	-0.0812781	0.638134
YDR293C	0.702735	YNL149C	-0.53705	YPL252C	-1.01475				YBR004C	0.517395	-0.0822143	0.304896
YOL053W	0.702242	YFR038W	-0.576917	YDL031W	-0.679683				YPL007C	0.555548	-0.0832589	0.589855
YDR499W	0.702225	YDR018C	2.51864	YBR104W	-0.94643				YDR126W	0.560618	-0.0835115	0.669092
YDR387C	0.702098	YDR284C	0.578682	YHR006W	0.851684				YDR403W	2.09467	-0.0852021	1.27197
YER088C	0.701951	YDR533C	0.729251	YJL079C	0.996537				YOR059C	1.60321	-0.0866436	1.52257
YFR005C	0.701949	YDL067C	0.631039	YKL214C	-1.11036				YDR263C	0.613348	-0.0866747	0.798415
YOR223W	0.701378	YGR250C	0.508884	YER057C	-0.667647				YCR089W	2.79098	-0.087936	2.56729
YBR280C	0.700889	YEL044W	-0.646887	YLR328W	-0.991064				YDR421W	1.37411	-0.0889652	1.32032
YHR016C	0.699769	YFR014C	0.905914	YGL137W	-0.592598				YCR068W	1.80331	-0.0903944	1.71226
YKR021W	0.69971	YKL150W	0.776561	YOR176W	-0.730622				YNL314W	0.881127	-0.090624	0.823035
YDR490C	0.698243	YEL038W	-0.578195	YER145C	-1.8088				YDR223W	0.835999	-0.0914157	1.2089
YAR027W	0.697506	YDR198C	-0.716475	YDL064W	-0.844328				YOR219C	0.906319	-0.0922664	0.862499
YIL152W	0.696959	YBR010W	0.424983	YOR122C	-0.66589				YLR376C	1.55295	-0.0933187	1.56143
YHR204W	0.696653	YKL062W	0.779931	YML008C	-0.518019				YER173W	1.12054	-0.0941954	1.23255
YDR011W	0.695697	YHR078W	-0.668056	YOR380W	1.56056				YJR062C	0.58647	-0.094372	0.612258
YNL094W	0.695381	YOR227W	0.632251	YJL129C	-0.836678				YLR313C	0.577868	-0.0946441	0.453585
YDL214C	0.694663	YGL087C	0.731508	YDL244W	1.90461				YGR168C	1.76499	-0.0949824	1.78029
YER053C-A	0.69204	YKL126W	0.460355	YDR332W	1.24452				YOR026W	0.900671	-0.0951923	0.88165
YMR097C	0.691164	YAL036C	-0.593635	YGL234W	-0.586222				YCL024W	1.56291	-0.0954119	1.46152
YGR006W	0.690539	YER154W	-0.511947	YIL142W	-0.589138				YJL210W	0.529692	-0.0957699	0.641588
YHR156C	0.690112	YBR138C	0.785591	YDL185W	-0.530755				YBR098W	0.784033	-0.0958097	0.689908
YDR236C	0.688898	YGL027C	-0.461859	YPR172W	-1.14997				YGR154C	2.11138	-0.0962671	2.1119
YMR019W	0.688621	YOL059W	-0.610313	YIL138C	-0.743922				YMR156C	0.843283	-0.0972518	1.07598
YGR127W	0.688472	YBL067C	-0.610675	YHL047C	1.43955				YDR181C	0.524384	-0.0972891	0.483662
YIL049W	0.688171	YBR256C	-0.554335	YDR172W	-0.53333				YCR092C	0.757423	-0.0985063	0.668993
YBR076C-A	0.684777	YOR137C	0.828623	YER048W-A	-0.893694				YOR375C	0.62492	-0.098961	0.416036
YOR023C	0.683826	YLR361C-A	0.786824	YNL274C	2.09851				YJL126W	0.706764	-0.0989683	0.672615
YGL117W	0.683744	YDR138W	-0.664191	YER001W	-0.623628				YMR267W	0.482645	-0.101469	0.564194
YLR166C	0.681895	YJR049C	-0.607645	YNL132W	-0.676111				YKL188C	2.52175	-0.103474	2.50565
YBR259W	0.681826	YGL094C	-0.60447	YPR062W	-0.651538				YCL004W	2.09271	-0.104246	2.04009
YDR306C	0.68161	YNL044W	0.436369	YOR305W	1.16781				YGL136C	0.646858	-0.104596	0.824648
YBR291C	0.681383	YPL267W	0.718621	YNL149C	-0.790841				YMR306W	1.0151	-0.104967	0.753857
YHR090C	0.68123	YDL149W	0.877629	YJL008C	-0.536577				YDR109C	0.780713	-0.106082	0.658446
YML041C	0.681149	YJL050W	-0.731647	YEL041W	1.78385				YAR050W	1.65332	-0.106973	1.41887
YHR129C	0.679958	YOR020W-A	0.898856	YDR461W	-9.76121				YLR431C	1.0038	-0.107464	1.01135
YDR532C	0.677564	YJR083C	0.712149	YPL146C	-0.82817				YMR023C	1.37153	-0.109372	1.23661
YOL058W	0.676874	YJL149W	0.637163	YML072C	-0.547754				YPL233W	0.997042	-0.110973	1.26551
YPL008W	0.676733	YER171W	-0.573008	YBR121C	-0.504648				YCR079W	1.24645	-0.111979	1.13182
YNL325C	0.676498	YNL087W	-0.830266	YJR021C	1.40797				YCR035C	0.61224	-0.113614	0.589543
YOR064C	0.676238	YFR019W	0.567344	YGR211W	-0.603836				YDR022C	0.840772	-0.115613	0.907044
YMR155W	0.675327	YNL141W	-1.078	YPR110C	-0.579466				YGR238C	0.914069	-0.116181	0.956481
YOL086W-A	0.674868	YPL008W	-0.859078	YOR220W	0.888241				YDR438W	1.21591	-0.118927	1.27846
YDR004W	0.674482	YDR073W	-0.826854	YOL092W	-0.812944				YKL017C	0.919987	-0.121421	0.930812
YOR347C	0.67387	YFL026W	-0.495359	YDR037W	-0.491321				YPL264C	0.947174	-0.122557	0.826415
YJR161C	0.67279	YCR036W	0.562109	YJR161C	0.658969				YOL154W	1.01731	-0.122614	0.492991
YFL042C	0.672401	YLR384C	-0.776143	YBR056W	0.988238				YDR014W	0.667176	-0.122853	0.570321
YOR377W	0.672384	YKR057W	-0.501924	YKL032C	-0.741976				YHR176W	1.01952	-0.124051	0.891165
YLL006W	0.672119	YEL033W	-0.698108	YOR127W	0.7918				YGR221C	0.497033	-0.124548	0.25731
YIL116W	0.671611	YDL179W	0.575673	YJL010C	-0.673819				YDR046C	0.501584	-0.127998	0.57241
YPR066W	0.67048	YBL005W	-0.673995	YMR131C	-0.666595				YNL063W	1.10276	-0.132263	1.02522
YLR355C	0.66891	YKL193C	0.709028	YDR479C	1.07581				YHL014C	0.769993	-0.133254	0.772713
YIL108W	0.668102	YLR006C	0.648125	YDR139C	-1.18101				YAL047C	0.493592	-0.133636	0.313752
YDR014W	0.667176	YDR399W	-0.670093	YEL002C	-0.631129				YNL025C	0.504298	-0.13407	0.310854
YPL221W	0.667119	YLR435W	-0.580433	YLR153C	-0.569518				YKR004C	1.02078	-0.135387	1.02842
YML087C	0.665919	YJR088C	0.475671	YDR099W	-0.510722				YNL328C	1.25648	-0.137402	1.16943
YPL154C	0.664423	YER005W	-0.657953	YPL072W	1.30896				YPL068C	0.715704	-0.14173	0.373128
YKL218C	0.663492	YHR143W	0.495859	YJR073C	1.60743				YHR048W	0.904155	-0.145597	0.622942
YER062C	0.662918	YBR005W	0.657802	YKL026C	2.32097				YOR128C	2.09413	-0.146019	2.14677
YER179W	0.662695	YLR359W	-0.433163	YER011W	-2.14086				YDL206W	0.538459	-0.148638	0.430849
YPL147W	0.662586	YPL239W	-0.524628	YNL201C	-0.849153				YNL006W	0.513681	-0.149879	0.54886
YOR152C	0.662455	YOL141W	-1.11932	YPL258C	1.39948				YJL213W	0.835407	-0.151501	0.456518
YHL019C	0.662056	YEL070W	2.29191	YDL021W	2.42979				YJL100W	0.601304	-0.151539	0.535853
YNL195C	0.661367	YNR028W	-0.63447	YIL124W	0.723197				YNL257C	0.492125	-0.152996	0.50209
YPR155C	0.661309	YMR209C	-0.784558	YLR312W-A	0.778336				YOR172W	0.512553	-0.153091	0.358936
YKL189W	0.660696	YBL091C-A	1.00188	YHR134W	1.28602				YDR082W	2.12015	-0.15398	2.17967
YLR312W-A	0.660063	YGL040C	-0.519285	YGR092W	0.714806				YOR367W	0.575123	-0.158647	0.618865
YLR189C	0.658891	YGR159C	-0.850751	YJL049W	1.15408				YEL049W	1.47397	-0.158664	1.1364
YOR226C	0.658825	YKR069W	-0.986764	YKL124W	1.19294				YJL093C	0.779856	-0.159703	0.696091
YOR104W	0.658209	YDR411C	0.55154	YJR096W	1.1349				YCR105W	1.66289	-0.162329	1.59129
YNL053W	0.657373	YFR005C	-0.652637	YGR244C	0.693097				YGL117W	0.683744	-0.162676	0.735419
YDL248W	0.65711	YML115C	-0.488518	YNR017W	-0.794423				YDR254W	0.753905	-0.165517	0.717678
YHR161C	0.656425	YPL081W	-0.42268	YJL005W	0.728994				YLL051C	0.839914	-0.16574	0.725482
YLR306W	0.655402	YGR240C	-0.433236	YPL017C	2.54733				YMR154C	0.815887	-0.166831	0.87071
YLR049C	0.65484	YGR055W	-0.450956	YJL050W	-0.602294				YHR156C	0.690112	-0.168476	0.687906
YCL031C	0.654765	YLR287C	-0.510662	YML099C	0.907688				YDR386W	1.39463	-0.171729	1.4444
YHR038W	0.652721	YGR119C	-0.512457	YER125W	-0.571157				YGR131W	1.06317	-0.173604	0.773692
YBR107C	0.652536	YDR332W	-1.01998	YGR042W	1.21506				YGL212W	0.733349	-0.175464	0.900119
YJR052W	0.652526	YGR052W	1.48392	YGR245C	-0.624452				YGR288W	0.832888	-0.177369	0.649601
YFR019W	0.652292	YBR163W	-0.840982	YDR334W	-0.862362				YBR270C	1.77606	-0.178488	1.87542
YDL200C	0.651791	YKL068W	-0.484499	YPL004C	0.623737				YPL216W	1.11737	-0.179864	0.96784
YKL065C	0.651344	YFL041W	-0.553238	YOL043C	1.37266				YFL050C	1.8267	-0.187099	1.69632
YGL124C	0.65121	YOL019W	0.461663	YGR207C	0.773987				YDL080C	0.638029	-0.189301	0.599089
YGR207C	0.650945	YMR130W	-0.632602	YPR033C	-0.504499				YIL009C-A	0.868014	-0.190225	0.88263
YLR320W	0.649991	YHR204W	-0.919605	YBR142W	-0.704341				YGL251C	1.67929	-0.193102	1.51213
YPL005W	0.647925	YJL057C	0.85016	YOR232W	-0.642604				YIL092W	0.737071	-0.194023	0.625457
YLR144C	0.647796	YBR125C	-0.571732	YGR043C	2.7264				YPL151C	0.866022	-0.194246	0.893563
YGL136C	0.646858	YBR212W	0.603997	YDL173W	0.735629				YPL214C	1.2494	-0.194501	1.09453
YMR176W	0.646664	YIL030C	-0.614773	YBR086C	-0.576658				YBR223C	1.27108	-0.194743	1.1891
YPL110C	0.644838	YDR233C	-0.552137	YBL078C	1.20316				YER076C	1.03687	-0.197476	1.14033
YLR014C	0.643677	YNL265C	0.674439	YDL063C	-0.814922				YGR289C	2.22565	-0.197815	2.05135
YOR244W	0.641513	YLR049C	0.616169	YIR019C	1.3061				YBR293W	1.65172	-0.198591	1.48466
YOR385W	0.640755	YGL220W	-0.619027	YLR214W	-2.46314				YHR080C	0.894908	-0.200069	0.806161
YMR201C	0.640283	YDR120C	-0.821068	YIL020C	-1.04307				YAL015C	0.750783	-0.200599	0.694695
YNL083W	0.639728	YHR047C	-0.471849	YNL308C	-0.642605				YGR170W	0.510341	-0.203963	0.390564
YJL090C	0.638583	YMR234W	-0.794207	YPR165W	-0.645474				YGR015C	0.821822	-0.204728	0.879179
YDL080C	0.638029	YDL157C	-0.59768	YER067W	2.27689				YPL174C	1.11851	-0.205137	1.09973
YDL027C	0.637806	YHR092C	0.633542	YML075C	-0.589802				YOR275C	0.631434	-0.207481	0.60305
YDR497C	0.637631	YER056C-A	-0.435127	YJR085C	-0.75818				YPL003W	0.889674	-0.208975	0.702351
YER163C	0.637303	YDR032C	0.781479	YFL041W	-0.755619				YLR456W	0.579969	-0.209128	0.568825
YBR255W	0.636996	YOR007C	-0.441545	YLR151C	1.60424				YDR534C	1.73891	-0.209285	1.17027
YCR069W	0.636395	YNR073C	2.55715	YOR098C	-0.703977				YDR366C	1.42162	-0.210194	1.39911
YPL206C	0.63577	YGR121C	-0.757097	YDR303C	-0.745232				YCL014W	0.871618	-0.210828	0.843588
YDL119C	0.635668	YOR130C	-0.702839	YMR262W	1.20143				YCL056C	1.70191	-0.211713	1.88612
YIL006W	0.634956	YIR028W	1.21878	YKL009W	-0.750041				YOR349W	1.17227	-0.215345	1.11305
YLR383W	0.633694	YKR035W-A	0.641108	YLR069C	0.636694				YJL023C	1.27362	-0.217974	1.30567
YOR180C	0.631814	YLR044C	-0.389161	YNR035C	0.675362				YNR059W	1.69419	-0.222232	1.43159
YIL106W	0.631588	YNL112W	-0.948067	YJR039W	1.1497				YHR194W	0.846972	-0.226619	0.781732
YOR275C	0.631434	YOR390W	-0.680748	YFL057C	2.61437				YJR006W	0.61558	-0.229553	0.646374
YPR111W	0.630184	YBL113C	-0.682707	YMR135C	1.09852				YJL090C	0.638583	-0.229594	0.618763
YLR205C	0.628533	YJR009C	-0.525087	YER042W	-0.788897				YGR287C	0.856187	-0.230908	0.669403
YBR269C	0.627846	YMR266W	-1.00614	YER101C	1.15224				YPR153W	1.31354	-0.231056	1.15679
YMR111C	0.62497	YKL149C	-0.775622	YDR353W	-0.517867				YHR018C	1.07287	-0.231216	1.05204
YOR375C	0.62492	YCR106W	-0.714338	YKR076W	1.39495				YJR107W	0.867443	-0.231359	0.711124
YJL059W	0.624685	YDL192W	-0.368403	YBR196C	-0.497448				YPL022W	1.01751	-0.232565	0.858999
YBL059W	0.624337	YDR086C	-0.49826	YKL045W	0.815839				YOL138C	0.835572	-0.233534	0.726716
YAL060W	0.622514	YGR054W	-0.536162	YHR142W	0.790623				YDR011W	0.695697	-0.23702	0.506374
YPL152W	0.621949	YDL201W	-0.529428	YMR088C	-0.805956				YKR102W	1.01742	-0.239855	0.770964
YDR268W	0.621265	YML130C	0.587594	YDR395W	-0.551985				YDR013W	0.739863	-0.240204	0.722797
YCR027C	0.620078	YDL161W	0.556534	YPL123C	1.1164				YHL048W	0.919539	-0.245506	0.921972
YIR032C	0.619357	YDR352W	-0.573878	YBL028C	-1.11668				YHR150W	0.984671	-0.24788	1.06323
YML131W	0.619018	YNR004W	-1.15417	YER056C-A	-0.61351				YPR066W	0.67048	-0.247891	0.56603
YER064C	0.61851	YLR316C	-0.625288	YNL147W	-0.90023				YGL079W	0.6024	-0.24932	0.515104
YPR036W-A	0.618364	YJL054W	-0.585263	YOR273C	1.85337				YPR085C	1.42222	-0.249561	1.47528
YJR112W-A	0.618241	YGL180W	0.68887	YDL238C	1.37155				YOR080W	0.81519	-0.252204	0.663994
YBR114W	0.617497	YIL078W	-0.374708	YOR354C	0.694809				YMR294W	0.904749	-0.252625	0.92319
YDR444W	0.61719	YOR154W	-0.836719	YAR050W	1.41887				YCR014C	2.45048	-0.254065	2.40302
YLR343W	0.616312	YER060W	-0.885375	YGR224W	3.99104				YER163C	0.637303	-0.257322	0.806436
YBR230C	0.616159	YDL182W	-0.526958	YPL081W	-0.55346				YLR266C	1.55868	-0.258386	1.50267
YDR364C	0.615958	YER121W	2.52454	YOR349W	1.11305				YHL047C	1.55159	-0.262514	1.43955
YBR225W	0.615899	YCR009C	0.462481	YMR042W	-1.58227				YJL013C	0.967628	-0.263034	0.837328
YNL159C	0.615854	YIL019W	-0.786852	YOR271C	-0.68214				YLR189C	0.658891	-0.26307	0.497004
YJR006W	0.61558	YGR162W	-0.570242	YGR222W	1.15018				YCL029C	0.549748	-0.263746	0.510417
YFR045W	0.614893	YDR505C	0.460861	YGR103W	-0.647618				YCL057W	0.758276	-0.265933	0.707985
YIR038C	0.613901	YML031W	-0.706345	YNL197C	-0.680321				YPL147W	0.662586	-0.266216	0.702508
YDR263C	0.613348	YGR174C	0.974186	YFL030W	1.86299				YOL091W	1.6256	-0.266472	1.68927
YCR035C	0.61224	YBR150C	0.76116	YLR229C	-0.670594				YDR523C	0.969992	-0.27076	0.46866
YJR122W	0.612034	YLR326W	0.724315	YER049W	-0.541074				YMR316C-B	0.79778	-0.272507	0.569138
YDL139C	0.611932	YDR025W	-0.390041	YJL109C	-0.62313				YMR224C	0.482472	-0.272525	0.305977
YNL261W	0.611716	YCL045C	-0.417744	YDL212W	-0.629015				YDR291W	0.482578	-0.272647	0.451025
YLR120C	0.611583	YJL042W	0.4501	YDR160W	1.0183				YOR205C	1.0536	-0.273334	1.11945
YPL060W	0.611549	YDR231C	0.93628	YIL030C	-0.659955				YLL055W	1.18131	-0.275823	0.764551
YLR412W	0.611317	YLR115W	-0.589881	YMR203W	-0.50276				YCR069W	0.636395	-0.276111	0.564578
YBR294W	0.610772	YJL026W	-0.432823	YOR121C	-9.31031				YHL032C	0.812842	-0.277135	0.640038
YNL157W	0.61074	YGL013C	0.447425	YPL233W	1.26551				YNL230C	0.527975	-0.279862	0.496015
YLR423C	0.610719	YEL043W	-0.702043	YCR086W	1.16834				YOR238W	0.556762	-0.281771	0.319107
YPR093C	0.610065	YAL054C	1.21173	YBR237W	1.07246				YIL049W	0.688171	-0.282203	0.535048
YNL100W	0.608755	YJR046W	-0.59232	YCR079W	1.13182				YLL006W	0.672119	-0.284074	0.504371
YPL067C	0.608561	YPL061W	-0.641182	YPL175W	0.948283				YFL044C	0.605831	-0.285087	0.474031
YDR541C	0.608505	YJR095W	3.09634	YDL192W	-0.551848				YCR090C	0.790972	-0.286984	0.745323
YDL048C	0.607857	YDL220C	-0.633559	YIR029W	1.83282				YNL056W	0.585679	-0.287073	0.546708
YPL071C	0.607718	YAL060W	0.76124	YGL104C	1.30483				YLL059C	1.51492	-0.287405	1.81758
YMR100W	0.607629	YKL128C	-0.50834	YDL160C	-5.6202				YCL063W	0.482143	-0.28755	0.406326
YGL226W	0.606787	YLR017W	-0.497164	YOL011W	0.721092				YEL023C	1.10903	-0.287844	1.11374
YDR511W	0.606485	YBR299W	1.21191	YHR005C-A	-0.787405				YMR127C	0.522376	-0.291934	0.551825
YFL044C	0.605831	YJR141W	-0.89189	YJL066C	0.960234				YGR075C	1.10182	-0.292103	1.07375
YJR033C	0.605012	YGR080W	0.659611	YOR185C	0.962133				YLR263W	1.74511	-0.296859	1.84624
YBR278W	0.603898	YOR217W	-0.5206	YCL051W	0.877679				YDR370C	0.746276	-0.297379	0.593719
YLR121C	0.603728	YDL232W	-0.602236	YLR177W	1.11631				YMR064W	0.868747	-0.302888	0.882254
YGL250W	0.602784	YPL050C	-0.575948	YNL115C	0.84762				YBL060W	1.18944	-0.306347	1.23882
YGL079W	0.6024	YPL075W	-0.554235	YBR155W	-0.769497				YBR063C	1.20855	-0.306503	1.09147
YJL100W	0.601304	YGR169C	-0.95309	YIL107C	0.977859				YLR315W	1.00613	-0.30657	0.883118
YPL087W	0.600765	YNL094W	-0.688723	YGL006W	0.707648				YGL125W	1.63683	-0.307473	1.58937
YDR137W	0.599317	YMR290C	-0.694843	YLR190W	-0.653754				YMR065W	2.36355	-0.309574	2.47982
YNR035C	0.599159	YML120C	0.709489	YKL065C	0.69445				YJL046W	0.598542	-0.311707	0.574396
YJL046W	0.598542	YKL019W	-0.494065	YJR047C	-1.76817				YML099C	0.963485	-0.312619	0.907688
YLR046C	0.596814	YIL150C	-0.785801	YBR085W	-1.96442				YDL243C	2.34594	-0.313127	1.85399
YGL021W	0.595731	YGR023W	0.805596	YER112W	-0.794508				YMR018W	1.70913	-0.313207	1.46771
YMR197C	0.594696	YML125C	-0.660903	YOR197W	-0.558507				YPL272C	0.727331	-0.313887	0.718866
YMR136W	0.593367	YBR252W	-0.585162	YGL090W	1.25642				YKL098W	0.886739	-0.315551	0.944452
YOR353C	0.592269	YBR229C	-0.495952	YIR034C	0.64778				YBR298C	2.72326	-0.319789	2.73183
YDR038C	0.591655	YGL031C	-0.415696	YOL112W	0.959958				YGR068C	0.494245	-0.320782	0.259151
YML129C	0.590739	YBR127C	-0.362471	YBR171W	-0.783761				YLR273C	0.813506	-0.321446	0.832077
YGL073W	0.59045	YIL053W	-0.656105	YAL017W	0.744354				YIL161W	0.711459	-0.324018	0.798046
YER081W	0.590398	YPL052W	0.768969	YOR239W	-0.604437				YJL058C	0.721012	-0.32634	0.400275
YPL176C	0.589749	YDR408C	-0.518195	YPL213W	0.960297				YBR216C	0.928162	-0.327653	0.917561
YEL028W	0.587204	YDL061C	-0.405827	YNL277W	-0.884427				YFR046C	1.08405	-0.329207	1.07161
YLL027W	0.586671	YDR529C	0.546328	YDL199C	1.7606				YBR065C	1.29424	-0.330586	1.30675
YJR062C	0.58647	YKL121W	0.65325	YCL031C	0.662742				YER109C	0.890408	-0.33254	0.83237
YDR196C	0.58598	YDR261C	-0.482955	YPR081C	1.15179				YCL061C	1.37212	-0.333433	1.44083
YNL056W	0.585679	YDR139C	-0.597776	YOR175C	-0.678938				YCR081W	1.43329	-0.337873	1.27392
YKL085W	0.585388	YGR117C	-0.682115	YOR219C	0.862499				YCR020C	2.4461	-0.338819	2.50106
YGL056C	0.585266	YOR320C	-0.520996	YIL017C	0.971077				YNL143C	0.835129	-0.338836	1.01387
YLR007W	0.584887	YHR022C	1.72413	YNR073C	3.58958				YDL197C	1.70111	-0.339004	1.70687
YJL084C	0.584522	YEL058W	0.371977	YJR117W	-0.630559				YMR284W	1.04041	-0.340946	0.99576
YJL151C	0.584043	YIL034C	0.536008	YPL012W	-0.635494				YLR007W	0.584887	-0.343723	0.486503
YDL115C	0.582012	YBR192W	-0.549284	YPR118W	-0.64463				YDR007W	1.86117	-0.344369	1.97745
YOR354C	0.58155	YJR052W	0.692071	YDR005C	0.814562				YIL084C	0.754143	-0.345835	0.606189
YPL014W	0.581328	YAR002C-A	-0.4289	YLR174W	1.71948				YDR402C	1.47029	-0.352396	1.21639
YPL267W	0.580972	YGL009C	-0.518928	YIL108W	0.667616				YLR247C	0.816806	-0.354722	0.608799
YJR149W	0.580874	YFR018C	-0.642067	YOR344C	-0.946933				YCR082W	0.970789	-0.355079	0.985669
YLR456W	0.579969	YML023C	-0.906977	YLR213C	-1.91537				YOL158C	0.789224	-0.355105	0.641652
YJR059W	0.579431	YMR110C	0.682274	YDR046C	0.57241				YER066W	0.880148	-0.356884	0.880487
YNR006W	0.57874	YNR069C	-1.53601	YBL011W	-0.668412				YHR105W	0.754538	-0.357923	0.699868
YFR003C	0.578608	YLR075W	-0.369605	YDR318W	1.27782				YOR022C	0.514728	-0.362136	0.37242
YML023C	0.578605	YLR141W	-0.713159	YDR265W	1.12338				YNL261W	0.611716	-0.363792	0.202206
YBR108W	0.577894	YOR188W	-0.593411	YBR297W	1.2128				YLR381W	1.15311	-0.366687	1.09808
YLR313C	0.577868	YKL028W	-0.497336	YOL080C	-1.00663				YGL211W	0.52206	-0.367001	0.577142
YBR071W	0.576136	YKL033W	-0.697131	YDR361C	-0.624542				YBR274W	0.54089	-0.368422	0.416616
YBR077C	0.575821	YCR026C	0.494435	YML002W	1.43519				YJL110C	2.11481	-0.369586	2.09279
YOR367W	0.575123	YPR021C	-0.630185	YLR050C	-0.991082				YHR091C	0.492914	-0.370983	0.443807
YBR145W	0.574578	YMR124W	0.640707	YJL216C	1.84984				YHR134W	1.24437	-0.3731	1.28602
YKL023W	0.572886	YOL107W	0.638734	YMR008C	0.57282				YCR094W	0.781186	-0.373559	0.909165
YMR172W	0.570965	YKL015W	-0.539121	YDL235C	-0.813236				YOR077W	1.00114	-0.374653	1.06884
YGL036W	0.570849	YGL012W	-0.44694	YBR089C-A	-0.724818				YGL134W	0.949909	-0.375592	0.85278
YNL015W	0.569433	YPL279C	-0.6575	YDL046W	-0.636568				YOL146W	0.495628	-0.376296	0.550832
YKL141W	0.568979	YNL280C	-0.489854	YNL118C	0.542406				YBR291C	0.681383	-0.377107	0.676838
YOR378W	0.568912	YHR199C	-0.547112	YER130C	0.973934				YCR044C	0.489264	-0.378692	0.507481
YGR023W	0.568605	YPR187W	-0.448305	YDL248W	0.638635				YDL176W	0.902293	-0.380307	0.878503
YCL036W	0.566586	YPL037C	-0.400347	YLL034C	-0.652537				YPL258C	1.62959	-0.380483	1.39948
YPL274W	0.56621	YDL150W	-0.639629	YIL099W	2.73505				YBR008C	1.64955	-0.384854	1.54613
YLR454W	0.564901	YLR003C	-0.589563	YML125C	-0.756033				YHR211W	1.92884	-0.386282	1.72046
YKL148C	0.563496	YAL058W	-0.639816	YBR154C	-0.634603				YLR394W	1.15993	-0.389938	1.00572
YCL002C	0.562667	YOL061W	-0.473801	YLR138W	-0.737426				YBL106C	0.729152	-0.391425	0.479483
YHR106W	0.560998	YLR056W	-0.42046	YDL153C	-0.654925				YIL165C	1.69784	-0.39187	1.72269
YDR126W	0.560618	YER125W	-0.378016	YLR097C	1.01336				YBR259W	0.681826	-0.392595	0.599812
YLR016C	0.560516	YLR345W	0.957727	YPL206C	0.719775				YLR035C	0.771604	-0.394207	0.633141
YNL146W	0.558815	YDR090C	-0.625866	YNL052W	-0.582632				YPL133C	0.749445	-0.398226	0.653908
YDR315C	0.55771	YOR034C	-0.627135	YJR069C	-0.717238				YOR381W	1.68788	-0.399226	1.59375
YAR033W	0.557571	YDR479C	0.675481	YPL137C	-0.674376				YDR444W	0.61719	-0.401198	0.731735
YGL175C	0.55704	YDR097C	0.474182	YGR174C	1.19563				YDR214W	0.527848	-0.401257	0.398021
YER159C	0.556865	YMR205C	-0.389115	YPR137W	-0.626185				YCL030C	1.16936	-0.402011	1.40967
YOR238W	0.556762	YMR298W	0.461016	YGR259C	4.50639				YPL071C	0.607718	-0.402928	0.761434
YNL222W	0.556216	YGL255W	0.822184	YOR357C	0.853458				YGR057C	0.818347	-0.405098	0.754267
YDR349C	0.556083	YER018C	0.630877	YPL219W	1.10479				YKL222C	1.52343	-0.410513	1.44224
YNL118C	0.55608	YDR511W	0.752453	YOR035C	0.766766				YPL072W	1.21932	-0.412708	1.30896
YOR215C	0.556044	YMR136W	0.801667	YLR381W	1.09808				YMR019W	0.688621	-0.415176	0.544344
YPL007C	0.555548	YGR048W	0.580122	YDL107W	1.15261				YKL050C	1.6661	-0.416078	1.59417
YBR046C	0.554415	YGR292W	1.28023	YMR052W	1.56183				YHR153C	1.11045	-0.417514	1.3587
YCR061W	0.552978	YAR031W	0.777431	YMR124W	0.729215				YPR115W	0.51184	-0.418935	0.320691
YLR093C	0.551844	YIL002W-A	-0.612446	YJR044C	-0.882586				YCR020C-A	0.849431	-0.420328	0.926073
YDR357C	0.551748	YPL247C	0.726816	YMR188C	0.776371				YLR320W	0.649991	-0.421015	0.471281
YGR205W	0.551377	YKL167C	0.785022	YPL061W	-1.25816				YEL063C	1.40252	-0.421166	1.49083
YLR206W	0.551197	YML075C	-0.657196	YDR429C	-0.510527				YDR459C	1.06569	-0.423675	0.92975
YHR119W	0.550981	YOR116C	-0.767817	YOL012C	-0.733722				YBL088C	1.02795	-0.424738	0.820982
YML057W	0.550264	YOR234C	-0.430663	YNL259C	-1.36985				YLR004C	1.14138	-0.426819	0.970384
YOL017W	0.550195	YDR093W	-0.512868	YLR166C	0.773211				YCL005W	0.962408	-0.427828	0.994077
YCL029C	0.549748	YGR060W	-0.488345	YBL113C	0.568866				YPL149W	0.902702	-0.433141	0.832383
YMR164C	0.54884	YNL065W	1.29318	YER015W	1.14684				YCL008C	0.847433	-0.435569	0.768327
YOL148C	0.548323	YIL087C	1.09422	YOR145C	-0.707362				YBR294W	0.610772	-0.440033	1.03684
YPR199C	0.547426	YJR068W	-0.455421	YPL093W	-0.563534				YLR125W	0.96783	-0.44092	0.875371
YBR251W	0.54674	YNL115C	0.602487	YBL036C	-0.682596				YER051W	0.512568	-0.442433	0.568153
YNR040W	0.545746	YPR105C	-0.47003	YLR376C	1.56143				YOR148C	0.742313	-0.447844	0.757426
YKL033W	0.544935	YCR028C	-0.754296	YGL032C	-8.67317				YDR541C	0.608505	-0.448239	0.433094
YIL007C	0.544569	YPL048W	-0.439298	YLR197W	-0.461887				YDR256C	0.834961	-0.450209	0.8431
YPL241C	0.544246	YCL010C	-0.6149	YAL036C	-0.608683				YDR078C	0.983146	-0.451389	1.04565
YNL172W	0.540964	YBR246W	-0.492325	YMR277W	-0.646061				YDL231C	1.51547	-0.45436	1.33759
YBR274W	0.54089	YPR156C	0.532527	YIR037W	-0.601169				YDR349C	0.556083	-0.459469	0.535618
YKL149C	0.539934	YGL016W	-0.657867	YHR169W	-0.772018				YJR131W	0.531402	-0.466957	0.445748
YNL254C	0.539363	YNL148C	-0.926654	YLR410W	-0.533589				YBL074C	1.54138	-0.468035	1.64184
YDL206W	0.538459	YOR018W	0.539744	YMR041C	1.07814				YER007W	0.518621	-0.472171	0.442966
YPL163C	0.537888	YDR178W	0.749231	YCL045C	0.48544				YPL167C	1.24134	-0.472377	1.10317
YHL023C	0.537587	YJL139C	-0.754391	YKL196C	-0.594508				YCL047C	0.934037	-0.475135	0.812132
YOR319W	0.536378	YPL254W	-0.509517	YIL022W	-0.542323				YPR082C	0.7781	-0.475253	0.924196
YHR138C	0.536366	YJR002W	-0.697463	YPL169C	-0.691565				YGL090W	1.22304	-0.478786	1.25642
YIL089W	0.535476	YNR034W	0.674448	YOR386W	1.12692				YLR016C	0.560516	-0.47884	0.504909
YFR007W	0.534536	YLR191W	0.569592	YPL050C	-0.564779				YMR172W	0.570965	-0.479008	0.66783
YAL027W	0.534482	YIL077C	0.79431	YLR204W	0.83263				YGR006W	0.690539	-0.480616	0.656415
YDR041W	0.534389	YLR065C	-0.532596	YOR036W	1.04908				YDR364C	0.615958	-0.481873	0.622291
YJL204C	0.532509	YDR174W	-0.405518	YMR081C	2.25668				YAL002W	0.784642	-0.488091	0.651385
YDL077C	0.53219	YBR176W	-0.680032	YGL055W	-0.512023				YLR343W	0.616312	-0.497956	0.613579
YJR131W	0.531402	YPL213W	0.643562	YKL219W	0.848041				YHR210C	1.34968	-0.499288	1.17223
YDR104C	0.530372	YJL020C	0.719456	YDR497C	0.59644				YNL187W	1.24325	-0.499508	1.19343
YJL210W	0.529692	YPL117C	-0.403599	YCL005W	0.994077				YGR133W	0.973834	-0.504584	1.00359
YLR417W	0.529339	YMR079W	-0.368314	YMR049C	-0.585296				YLL003W	0.943101	-0.505612	0.869479
YDL087C	0.528475	YIL022W	-0.432313	YGR078C	-0.728745				YDR387C	0.702098	-0.51236	0.645284
YGR021W	0.528383	YMR177W	-0.786574	YOL013W-A	-1.29942				YLR318W	1.87522	-0.5128	1.90198
YNL230C	0.527975	YBR242W	-0.655322	YML120C	0.855008				YCL036W	0.566586	-0.518691	0.447953
YDR214W	0.527848	YHR077C	-0.518342	YLR402W	-2.32127				YCR107W	2.36505	-0.522833	2.11219
YCR053W	0.527269	YJR051W	-0.478783	YER159C	0.800562				YEL072W	1.24972	-0.523034	1.31294
YMR020W	0.527002	YEL030W	-1.01925	YJL122W	-0.758624				YFR022W	1.30117	-0.525044	0.962297
YHR159W	0.526734	YOL108C	0.701985	YGL167C	-0.513455				YLR233C	1.2627	-0.528242	1.12094
YGL095C	0.526727	YOR243C	-0.589603	YJL023C	1.30567				YMR069W	0.483158	-0.528474	0.0404418
YBL038W	0.526508	YHR007C	-0.620162	YGL012W	-0.634786				YLR393W	1.27316	-0.531375	1.18172
YFL024C	0.525337	YPL019C	-0.405093	YGR052W	2.1666				YJR109C	0.734501	-0.534067	0.733719
YLR204W	0.525143	YPL160W	-0.563935	YBR216C	0.917561				YOR060C	1.64018	-0.535181	1.50505
YDR181C	0.524384	YGR130C	0.832572	YGR041W	-0.957971				YCR023C	1.57498	-0.53926	1.53861
YIL042C	0.524006	YDR281C	-0.822718	YOR348C	2.21529				YHR199C	0.512244	-0.547112	0.433304
YLR132C	0.522716	YNL037C	0.409769	YKL159C	1.14334				YLR412W	0.611317	-0.548023	0.53616
YLR299W	0.522703	YER047C	0.596904	YCR090C	0.745323				YPL095C	1.11225	-0.551572	1.08725
YMR127C	0.522376	YGR155W	-0.380239	YIL109C	-0.443519				YHL022C	1.21812	-0.551576	1.19513
YGL211W	0.52206	YDR234W	-0.736694	YPL239W	-0.678033				YMR063W	1.27422	-0.552109	1.16482
YLR438W	0.521125	YGL256W	-0.830616	YDR293C	0.512911				YHR129C	0.679958	-0.553908	0.802954
YOR245C	0.521009	YDL093W	-0.578522	YML107C	1.28842				YBR256C	0.833459	-0.554335	0.84461
YMR120C	0.5207	YML046W	-0.539638	YLR246W	1.27436				YGL154C	1.16298	-0.555112	1.08721
YGR143W	0.520663	YGR118W	-0.332445	YLR393W	1.18172				YLR014C	0.643677	-0.557534	0.430418
YPL107W	0.520016	YGR028W	0.573414	YDL181W	-0.920313				YLR097C	1.06895	-0.557896	1.01336
YJR119C	0.519683	YBR042C	-0.69381	YNL153C	-0.774955				YEL016C	0.810756	-0.56398	0.766887
YGR244C	0.518761	YOL049W	-0.416093	YBR205W	-0.565746				YBR043C	2.44581	-0.566058	2.59748
YER007W	0.518621	YHR070W	-0.751776	YER019W	-0.744843				YML002W	1.59868	-0.567258	1.43519
YIR034C	0.517825	YMR108W	-0.52597	YDR447C	-0.493564				YER015W	1.29951	-0.573058	1.14684
YMR022W	0.51778	YKL106W	-0.585947	YPL167C	1.10317				YNL249C	0.826785	-0.576155	0.847844
YJL044C	0.517662	YNL293W	0.628316	YER088C-A	-1.26485				YEL025C	0.726437	-0.576317	0.541559
YBR004C	0.517395	YGL104C	0.748704	YOL023W	0.944068				YJR149W	0.580874	-0.578181	0.705292
YKL003C	0.516836	YCR023C	-0.53926	YNL202W	2.73975				YJR122W	0.612034	-0.584764	0.446468
YGR080W	0.516002	YOR372C	0.490424	YHR206W	-0.677486				YDL109C	1.65938	-0.585338	1.58907
YIL130W	0.515943	YPR107C	0.680526	YDR487C	-0.580217				YCR053W	0.527269	-0.58537	0.612488
YDL149W	0.515458	YDR107C	0.709574	YOR212W	-0.595973				YLR046C	0.596814	-0.586528	0.309323
YOR022C	0.514728	YER186C	-0.703648	YBR223C	1.1891				YDR160W	1.01031	-0.590137	1.0183
YLR382C	0.51463	YLL010C	0.548283	YJL057C	1.05228				YBR107C	0.652536	-0.590328	0.394479
YNL006W	0.513681	YNR027W	-0.694475	YAL028W	1.70881				YNL331C	1.41966	-0.591698	1.22226
YER051W	0.512568	YGR258C	0.618191	YLL061W	-0.70214				YOR389W	0.948614	-0.596141	0.824509
YOR172W	0.512553	YMR040W	1.15311	YOR217W	-0.586666				YJL162C	0.77563	-0.600195	0.727764
YMR152W	0.51243	YGL238W	-0.414485	YHR070W	-0.738185				YLR383W	0.633694	-0.603922	0.531479
YHR199C	0.512244	YOL014W	-1.24078	YIL136W	2.27372				YCR102C	1.04665	-0.604091	0.556245
YLR085C	0.512094	YLR242C	-1.03088	YBL054W	-0.796291				YJR004C	2.89536	-0.604298	2.78792
YOL108C	0.511898	YPL211W	-0.565267	YPL086C	-0.572996				YNL254C	0.539363	-0.60632	0.518745
YPR115W	0.51184	YCR024C-B	-0.536563	YNR058W	1.79775				YLR460C	1.06086	-0.610597	0.665542
YDR384C	0.511267	YOL028C	-0.741764	YPL174C	1.09973				YOL043C	1.21444	-0.612644	1.37266
YLR362W	0.511061	YLR094C	0.505774	YHR075C	1.34651				YBR228W	0.881088	-0.613316	0.914242
YMR304W	0.510845	YOR066W	0.522583	YOL076W	-0.650568				YOR305W	1.02832	-0.613736	1.16781
YKR029C	0.51069	YDR161W	-0.563525	YGR264C	-0.483418				YCL010C	1.88389	-0.6149	1.74765
YER116C	0.51053	YMR175W	2.54394	YMR271C	1.76212				YOR318C	1.44761	-0.615103	1.29771
YGR170W	0.510341	YLR148W	0.451958	YLR188W	-0.701429				YLR165C	1.74806	-0.620041	1.71206
YPL177C	0.509831	YER146W	-0.533518	YOR019W	1.91726				YKR022C	0.881644	-0.629125	0.977367
YBR188C	0.509538	YHR135C	-0.37108	YBR042C	-0.892768				YNR056C	1.52197	-0.629543	1.50944
YOL003C	0.508751	YPR128C	-0.473778	YER027C	-0.689454				YCL002C	0.562667	-0.636405	0.44592
YBR204C	0.508741	YDL195W	-0.42244	YOL122C	0.655387				YDR004W	0.674482	-0.642804	0.590971
YNL020C	0.507752	YBR133C	-0.515938	YNL131W	-0.518633				YBR217W	0.878074	-0.644912	0.931802
YJL099W	0.507292	YCR073C	0.714974	YPL036W	-0.595777				YFR005C	0.701949	-0.652637	0.680986
YDL044C	0.505594	YNR066C	0.635536	YNL064C	-0.444407				YKR103W	0.746198	-0.662519	0.620487
YGR179C	0.505263	YOL092W	-0.617959	YAL021C	-0.566406				YDR285W	1.19363	-0.672692	1.20299
YNL025C	0.504298	YOR294W	-0.601106	YPL234C	-0.626446				YBL113C	0.809305	-0.682707	0.568866
YLR094C	0.504197	YDR513W	0.77235	YBR213W	-1.27876				YJL216C	1.87824	-0.684209	1.84984
YGR270W	0.502419	YGR109C	0.704608	YBR072W	3.17081				YCL011C	0.730834	-0.687901	0.698188
YMR219W	0.502414	YPL004C	0.731016	YML080W	-0.734249				YNL094W	0.695381	-0.688723	0.568117
YDL173W	0.502007	YGL062W	0.432031	YGL255W	-0.710791				YOR010C	1.54451	-0.696966	0.97127
YPR127W	0.501653	YOL080C	-0.668875	YLR165C	1.71206				YKL033W	0.544935	-0.697131	0.467646
YDR046C	0.501584	YGR187C	-0.59469	YOR155C	0.719				YNL118C	0.55608	-0.703452	0.542406
YKL048C	0.50131	YHR177W	-0.890433	YNL015W	0.6752				YLL056C	1.18417	-0.711546	0.870762
YOR125C	0.501159	YOL071W	0.780151	YPL151C	0.893563				YCR106W	2.4079	-0.714338	2.13248
YIL125W	0.501036	YOR313C	-1.14244	YMR197C	0.701351				YGR042W	1.10641	-0.724657	1.21506
YDR202C	0.500287	YBR009C	0.378966	YLL063C	1.34761				YHL046C	0.75832	-0.73263	0.322931
YER092W	0.50003	YML096W	-0.70341	YPL273W	-0.464855				YGL240W	0.845807	-0.747631	0.796101
YPL269W	0.500029	YER050C	0.639863	YNL084C	-0.63923				YGL175C	0.55704	-0.749843	0.445756
YNL104C	0.499445	YEL046C	-0.554993	YBR292C	-3.10322				YER180C	0.74937	-0.751439	0.638199
YGL227W	0.499332	YCR047C	-0.673858	YCR075W-A	1.22698				YCR028C	0.781814	-0.754296	0.663845
YJL016W	0.498843	YER175C	0.662703	YIL116W	0.656031				YER041W	1.21361	-0.756107	1.13293
YGR046W	0.498279	YLR284C	1.0404	YDL204W	1.98911				YJL044C	0.517662	-0.761435	0.431983
YLR392C	0.498112	YIL113W	1.57471	YDL143W	-0.500489				YMR176W	0.646664	-0.773503	0.50748
YMR158W	0.497774	YPL047W	-0.804245	YHR098C	-0.498901				YKL149C	0.539934	-0.775622	0.456968
YGR221C	0.497033	YMR181C	1.02418	YBR243C	-0.714184				YOR192C	0.946674	-0.793694	0.847661
YDL174C	0.496887	YKL048C	0.609911	YKR071C	-0.524				YPR121W	1.34878	-0.799045	1.42173
YER045C	0.496764	YER136W	-0.352854	YJR072C	-0.563826				YPR196W	0.961742	-0.80763	0.740637
YOL146W	0.495628	YOR021C	-0.419451	YOR315W	-0.688075				YCL018W	2.54198	-0.839793	2.49536
YMR031C	0.495268	YER038C	-0.928683	YBR284W	1.73267				YPL064C	1.13638	-0.842715	1.13791
YIL098C	0.494625	YMR180C	0.756311	YHR172W	-0.851494				YOL164W	1.84433	-0.845414	1.5561
YGR068C	0.494245	YGR173W	-0.415841	YML086C	-0.481946				YPL008W	0.676733	-0.859078	0.62837
YLR451W	0.494237	YNR032C-A	-0.684731	YNL157W	0.707442				YOR202W	3.51067	-0.886232	3.62497
YAL047C	0.493592	YNL175C	-0.540801	YJR090C	-0.665665				YDL154W	1.13615	-0.886966	0.882734
YHR091C	0.492914	YER043C	-0.352297	YKL082C	-0.6549				YOR009W	2.34746	-0.887641	2.04033
YNL257C	0.492125	YNL046W	0.641206	YCL059C	0.540666				YJR112W-A	0.618241	-0.901601	0.73732
YDL230W	0.491107	YNL154C	-0.346941	YNR019W	-0.552446				YBR145W	0.574578	-0.904773	0.444123
YPL155C	0.491044	YDL143W	-0.403274	YMR064W	0.882254				YML023C	0.578605	-0.906977	0.351593
YBR156C	0.490845	YDR435C	0.602641	YKL112W	-0.636486				YIR019C	1.64856	-0.912569	1.3061
YFL033C	0.490657	YDR009W	0.99343	YKL168C	1.11813				YHR204W	0.696653	-0.919605	0.581538
YCR044C	0.489264	YHR167W	0.56698	YOR321W	-0.710057				YOL015W	1.26447	-0.923458	1.09128
YGR048W	0.488799	YBR258C	0.824573	YPR016C	-0.482986				YOR378W	0.568912	-0.968161	-0.148616
YMR008C	0.488274	YNL038W	-0.723464	YLR129W	-0.599086				YKR069W	0.741758	-0.986764	0.748887
YJL147C	0.486292	YFL039C	-0.327666	YPR138C	-0.755346				YLR227C	1.14493	-1.01328	1.22256
YDR436W	0.485925	YHR149C	-0.598574	YNL256W	-0.591164				YEL030W	1.20768	-1.01925	1.24916
YML027W	0.48559	YMR318C	-0.365253	YHR197W	-0.655779				YDR332W	1.34012	-1.01998	1.24452
YML119W	0.484265	YLR344W	-0.41633	YDR058C	1.74464				YGL193C	2.14502	-1.06703	1.9997
YDR247W	0.484229	YHR002W	0.779698	YBL019W	1.23134				YGL243W	1.24924	-1.11884	1.25685
YDR227W	0.483537	YGL041W-A	0.614846	YKR027W	0.807615				YOR364W	1.08222	-1.13125	1.17446
YMR069W	0.483158	YER007C-A	-0.443229	YGL205W	3.27539				YKL090W	0.770764	-1.14774	0.699607
YAL055W	0.482795	YLR105C	-0.6477	YER150W	1.73785				YDR336W	0.863566	-1.15906	0.803138
YMR267W	0.482645	YDR346C	-0.463009	YBR159W	-0.597929				YKR104W	1.09276	-1.3038	0.89767
YGL110C	0.482637	YIL055C	0.812921	YPL254W	-0.792299				YLR040C	2.51785	-1.31592	2.45643
YDR291W	0.482578	YNL157W	0.607218	YCR107W	2.11219				YOR377W	0.672384	-1.31652	0.569655
YMR224C	0.482472	YKL026C	1.57746	YKL085W	0.602335				YIL089W	0.535476	-1.33475	0.185588
YCL063W	0.482143	YOR079C	0.536325	YER100W	-0.682716				YOR303W	1.2798	-1.37911	1.2083
YHR147C	0.481581	YHR148W	-0.581661	YDL219W	-0.779522				YNR069C	1.80892	-1.53601	1.57011
YMR302C	0.48155	YLR114C	-0.468468	YBL032W	-0.630707				YER188W	0.7277	-1.6951	0.153474
YLL023C	0.480019	YGL169W	-0.616347	YJR094W-A	-0.493166				YOL058W	0.676874	-1.89626	0.746994
YLR176C	0.479762	YLR383W	-0.603922	YEL047C	-0.607953
YDR249C	0.478903	YGL114W	-0.53462	YNL044W	-0.625862
YNR075W	0.478866	YBL038W	0.595958	YPR060C	-0.606696
YLR238W	0.478642	YDR483W	-0.432494	YDL042C	-0.784573
YPR049C	0.478494	YDR475C	0.541624	YNL096C	-0.459723
YDL170W	0.478425	YJL038C	2.60592	YLR059C	-0.832259
YPR006C	0.477784	YGR158C	-0.48611	YLR438W	0.611721
YGL208W	0.477768	YOR113W	0.662419	YPL163C	0.565477
YDR096W	0.477055	YNL325C	0.561007	YDR384C	0.711629
YBR272C	0.476983	YOR100C	1.9864	YOR100C	3.10896
YDR206W	0.475921	YDR067C	0.584764	YMR256C	-0.746864
YGR237C	0.475788	YOR216C	-0.436661	YDR510W	-0.610136
YBL037W	0.474928	YOR168W	-0.379802	YGR256W	1.51462
YNL058C	0.474915	YHR033W	0.991479	YDR412W	-0.726277
YDR016C	0.474447	YFR040W	0.459063	YER175C	0.867601
YBR175W	0.473732	YOL090W	0.392179	YDR018C	3.28165
YPL103C	0.473655	YHR193C	-0.381438	YER103W	1.80734
YPR057W	0.472346	YOR386W	0.793835	YLR106C	-0.50549
YKR098C	0.472046	YAR028W	0.632762	YIR023W	0.708944
YAL001C	0.471309	YGR093W	-0.580759	YEL013W	-0.516879
YDL133W	0.471295	YPR026W	0.796385	YLL014W	-0.852638
YOR222W	0.470476	YNL222W	0.529379	YOR327C	-0.676758
YNL133C	0.470431	YML062C	0.503372	YNL238W	-0.642253
YNR010W	0.470411	YNL256W	-0.619327	YIL048W	-0.666228
YKL103C	0.468951	YML050W	0.840213	YMR235C	-0.46051
YNL211C	0.468381	YJL148W	-0.602583	YGR082W	-0.575306
YLR348C	0.467747	YKL032C	-0.394038	YKL133C	1.55851
YNL180C	0.466804	YMR076C	0.403205	YOR346W	-0.744029
YCL001W	0.465485	YPL271W	0.600169	YOR039W	-0.588454
YNL192W	0.464826	YMR295C	0.467438	YPL190C	-0.489929
YGR028W	0.463873	YIR024C	0.675578	YJR151C	1.13699
YKL186C	0.463691	YEL051W	-0.363616	YGL056C	0.584107
YOR266W	0.462948	YMR211W	-0.59663	YJR124C	-0.891718
YML020W	0.462935	YAL014C	-0.531355	YNR069C	1.57011
YOR285W	0.462508	YFR003C	0.735851	YBR295W	0.867291
YCR059C	0.460866	YHR144C	-0.615792	YLR453C	1.48383
YIR018W	0.460394	YLL013C	0.382319	YPL016W	-0.690254
YFL034C-A	0.460121	YMR206W	2.64596	YIL023C	0.775401
YGR084C	0.458938	YKL124W	0.644261	YBR034C	-0.570094
YDL239C	0.45888	YJL014W	-0.426483	YGL077C	-0.623117
YKL155C	0.458572	YGR245C	-0.773178	YJR152W	1.19376
YDR111C	0.457426	YPL237W	-0.402406	YEL030W	1.24916
YOL105C	0.456869	YDR488C	-0.620123	YLR390W-A	-0.478734
YGR166W	0.456626	YLL041C	0.582529	YPL212C	-0.548444
YLR191W	0.456443	YPL176C	0.389968	YER146W	-0.806302
YML111W	0.455564	YFR004W	0.414569	YGR035C	-1.40182
YPL242C	0.455112	YLR154C	-0.72782	YPL094C	-0.558619
YMR188C	0.454648	YKR081C	-0.578843	YGL067W	-0.748006
YKL035W	0.453822	YGL008C	-0.375465	YLR363W-A	-1.13144
YDR204W	0.4534	YOL109W	0.413116	YIL165C	1.72269
YJR103W	0.453242	YJL068C	0.567683	YIL064W	-0.731167
YIR021W	0.452135	YHR147C	0.573204	YLR435W	-0.780244
YLR290C	0.451991	YIL023C	0.450817	YNL100W	0.68673
YLR237W	0.451673	YPR068C	-0.884778	YPL179W	-0.596083
YDR122W	0.450864	YBR147W	1.27227	YOL057W	-0.52911
YPR109W	0.450478	YDL025C	0.572691	YBR151W	-0.655142
YLR297W	0.44998	YLR371W	0.382212	YOR026W	0.88165
YBR230W-A	0.449833	YPR124W	-0.64822	YGL050W	-0.880409
YBR255C-A	0.449295	YDR004W	-0.642804	YOR159C	-1.11232
YER144C	0.449265	YLR109W	-0.783867	YHR165C	-0.577351
YBR052C	0.449063	YGL200C	-0.354117	YOR272W	-0.56202
YPL191C	0.448793	YJR109C	-0.534067	YEL072W	1.31294
YMR240C	0.448396	YIL128W	-0.480052	YPR190C	-0.570485
YOR279C	0.448132	YPL221W	0.412135	YHR037W	0.485766
YJR098C	0.448086	YJL164C	0.837573	YJL167W	-0.477577
YLL007C	0.448081	YJR056C	0.583311	YPL199C	-0.631182
YHR195W	0.447024	YLR177W	0.969048	YKL098W	0.944452
YNL260C	0.446881	YMR270C	-0.700243	YBR063C	1.09147
YOR158W	0.445914	YLR185W	-0.366767	YNR059W	1.43159
YMR228W	0.445626	YFL028C	-0.462865	YGR084C	0.702434
YML104C	0.445606	YBR194W	0.707677	YNL217W	-0.667087
YBR152W	0.444772	YOR202W	-0.886232	YPL026C	0.763945
YBL010C	0.444542	YNL159C	0.543037	YNL251C	-0.596152
YGL191W	0.444117	YIR007W	0.665632	YAL024C	-0.831826
YOL067C	0.443895	YKL133C	1.24665	YGR175C	-0.478187
YBR168W	0.44369	YMR031C	0.73266	YJL124C	-0.621233
YOL137W	0.443516	YNL061W	-0.614215	YNR030W	-0.677644
YHR044C	0.442853	YAL019W	-0.512936	YNR031C	-0.592215
YBL089W	0.442701	YER059W	0.536674	YML093W	-0.538415
YAR018C	0.441316	YDR089W	0.46137	YDL067C	-0.66689
YOR249C	0.440767	YGL224C	-0.533287	YPL128C	-0.7206
YDL106C	0.440441	YOR382W	1.95205	YOL124C	-0.782852
YPR162C	0.440024	YPL210C	-0.360455	YML041C	0.955012
YAL010C	0.439425	YKR038C	-0.414731	YPL043W	-0.554682
YOR054C	0.439023	YMR024W	0.430763	YDR516C	1.20821
YOR337W	0.43894	YER115C	-0.963905	YCL008C	0.768327
YBR021W	0.438264	YDR079W	0.65804	YDR161W	-0.556939
YDR296W	0.437634	YNL252C	0.429073	YDR324C	-0.47743
YGR030C	0.437248	YPL029W	-0.511844	YOR143C	-0.915709
YPL158C	0.435999	YLR274W	0.379249	YPR121W	1.42173
YMR168C	0.435661	YHR107C	-0.368599	YPR159W	-0.459126
YDR466W	0.434549	YEL027W	-0.390031	YNL108C	-0.720664
YBR222C	0.433833	YPR034W	-0.382046	YCR097W	-10.9813
YKL005C	0.433467	YER118C	-0.460981	YJL170C	-5.02399
YOR278W	0.432724	YKR036C	-0.658929	YNL078W	-0.803952
YBR055C	0.432195	YER164W	-0.39087	YNL023C	-0.758643
YHR037W	0.429739	YDL095W	-0.423409	YJL076W	-0.512565
YLR011W	0.429553	YOR236W	-0.572164	YKL017C	0.930812
YOR065W	0.428608	YNR012W	-0.731529	YOR140W	-0.702011
YGL091C	0.428511	YDR146C	0.437597	YER064C	0.51953
YLR310C	0.428368	YER088C	0.43073	YGR158C	-0.721518
YOL096C	0.428045	YGL202W	-0.334247	YMR123W	-0.772439
YER061C	0.427832	YCR030C	0.428038	YER107C	-0.617548
YOL063C	0.426945	YBL036C	-0.377107	YJR106W	0.872909
YMR157C	0.426629	YKL216W	-0.408237	YJL125C	-0.692382
YPR173C	0.425802	YDR245W	-0.405838	YOL071W	0.897748
YJR019C	0.425745	YJR007W	-0.41316	YCR092C	0.668993
YOR166C	0.425169	YKL045W	0.426472	YOL125W	-0.82966
YKL119C	0.423565	YPL049C	-0.420701	YJL033W	-0.571407
YPL040C	0.423462	YNL003C	-0.597	YHR085W	-0.82969
YKL079W	0.423333	YBR255W	0.531195	YDL176W	0.878503
YOR075W	0.422574	YBR142W	-0.642191	YJL155C	0.814753
YNL082W	0.422448	YDL098C	-0.783928	YNR038W	-0.622404
YGL163C	0.421301	YDR262W	0.449486	YAL054C	1.4839
YBR026C	0.421067	YDR140W	-0.561285	YNL287W	-0.443651
YGL063W	0.420627	YGL250W	0.965592	YOR045W	-0.72655
YLR047C	0.419861	YBL008W	-0.468228	YKL160W	-0.706962
YDR313C	0.41943	YER001W	-0.497426	YPR082C	0.924196
YDR451C	0.418656	YOR291W	-0.462491	YBR252W	-0.721595
YPR179C	0.41858	YDL189W	-0.442844	YLR288C	1.05499
YKR087C	0.418517	YKL141W	0.533716	YDR009W	1.53392
YDL056W	0.417016	YLR083C	-0.503816	YJL197W	-0.609863
YPL215W	0.416153	YOR091W	-0.564625	YHR150W	1.06323
YPL257W	0.414763	YOR352W	0.732534	YNL288W	-0.654656
YLR090W	0.414466	YOL029C	-0.892376	YNL085W	-0.545013
YLR250W	0.414299	YJL106W	0.936993	YLR268W	-0.591194
YPL074W	0.413918	YBR157C	0.747889	YNL063W	1.02522
YER050C	0.413742	YOR171C	-0.447188	YIL097W	1.12198
YJR080C	0.413561	YPR110C	-0.530028	YAL004W	-10.8815
YGL256W	0.413541	YMR277W	-0.555965	YIL106W	0.625936
YIL065C	0.413275	YCR065W	0.486746	YOR359W	-0.714815
YKR052C	0.412342	YPL179W	0.39494	YDR054C	-0.523978
YMR163C	0.411441	YOL087C	0.473034	YKR022C	0.977367
YKL101W	0.410987	YJR039W	0.559505	YGR187C	-0.573652
YMR087W	0.410249	YGR095C	-0.466043	YGR213C	1.78903
YJR083C	0.409244	YPL146C	-0.512452	YJL198W	-0.55906
YNL116W	0.408733	YBL052C	-0.636872	YPL207W	-0.516213
YLR069C	0.407867	YKL171W	0.610555	YGR238C	0.956481
YOL033W	0.407741	YPL157W	-0.567374	YML057W	0.522303
YKL069W	0.407052	YOR155C	0.534264	YOR254C	-0.491682
YPR020W	0.406975	YHR041C	-0.514055	YDL208W	-0.548849
YPL077C	0.406206	YJR122W	-0.584764	YPL113C	1.477
YMR117C	0.405955	YBL071W-A	-0.581042	YOR102W	-7.83747
YDR132C	0.405445	YFL007W	-0.529216	YDR034W-B	2.24844
YIR003W	0.405166	YLR312W-A	0.452337	YCR020C-A	0.926073
YML049C	0.404742	YPL113C	0.980064	YBR251W	0.644859
YOR130C	0.404485	YGL172W	-0.405885	YAR015W	0.501264
YLR099C	0.404277	YLL062C	-0.601107	YNL080C	-0.852596
YER186C	0.403743	YKL212W	-0.315356	YJL048C	0.830977
YBR045C	0.403211	YNL014W	0.77467	YOR285W	0.524994
YIR024C	0.403032	YER041W	-0.756107	YHR198C	0.828366
YJR011C	0.402234	YPR181C	-0.388452	YGR208W	-0.620526
YBR095C	0.401482	YBL090W	0.613849	YGL220W	-0.745529
YBR166C	0.400118	YOR177C	1.06271	YHR038W	0.900421
YAL051W	0.399316	YIL007C	0.635015	YBR247C	-0.578683
YOR258W	0.397605	YOR355W	-0.456656	YDR502C	-0.562239
YCL045C	0.39727	YPL060W	0.674154	YGL141W	0.754087
YGL114W	0.396799	YGR174W-A	2.42557	YPL110C	0.538399
YPL255W	0.396476	YDR160W	-0.590137	YER118C	-0.659173
YGR024C	0.395979	YMR259C	-0.708799	YGL128C	1.18299
YBR030W	0.395747	YGL161C	0.455776	YPL024W	0.941528
YIL102C-A	0.395239	YBR026C	0.598451	YER080W	-0.52083
YOR334W	0.39476	YDL216C	0.758198	YBR071W	0.696294
YLR148W	0.394737	YBR060C	-0.496239	YGR278W	0.830959
YNL047C	0.39466	YJL191W	-0.332569	YGL223C	0.735349
YMR187C	0.394655	YNL225C	0.53076	YEL046C	-0.400537
YNL208W	0.394469	YFR039C	-0.441914	YIR018C-A	-6.62278
YLR319C	0.394455	YDL014W	-0.429869	YDL112W	-0.508576
YOR138C	0.394438	YKR070W	-0.469072	YCR028C	0.663845
YAL040C	0.393672	YLR008C	-0.430537	YER037W	0.71904
YDR067C	0.393095	YNL024C-A	-0.482523	YDR261C	-0.597155
YOR371C	0.393009	YIL062C	0.553413	YBR085C-A	0.744444
YMR059W	0.392968	YBL068W	-0.398771	YMR316W	0.974426
YLR079W	0.392833	YPL015C	-0.436579	YML094W	-0.673836
YDR141C	0.392806	YML008C	-0.292881	YGL006W-A	-3.58248
YDR108W	0.392499	YPL253C	0.556034	YNL200C	0.989396
YGR097W	0.392493	YPL094C	-0.363366	YOR356W	-0.567765
YBR111C	0.391079	YBL039C	-0.599334	YNR002C	2.74295
YPR140W	0.391008	YKL162C	1.00859	YLR292C	-0.653221
YBR140C	0.390656	YER009W	-0.301426	YFR005C	0.680986
YCR020W-B	0.390481	YGL105W	-0.345545	YGL029W	-0.928271
YDR262W	0.390337	YLL027W	0.490604	YDL025C	0.860018
YDR374W-A	0.38931	YJL031C	0.60611	YER041W	1.13293
YFR008W	0.389152	YOR115C	-0.462196	YCL030C	1.40967
YHR101C	0.389023	YDL057W	0.664336	YGL105W	-0.420783
YMR185W	0.388966	YLR452C	-0.626329	YGR169C-A	-0.746076
YMR021C	0.388927	YOL062C	-0.385587	YDL169C	2.14784
YBR185C	0.387714	YNR017W	-0.418375	YDR130C	0.92269
YMR160W	0.387347	YKL205W	-0.561668	YPL260W	0.474188
YGR246C	0.38708	YKL198C	-0.553416	YDR236C	0.832063
YKL011C	0.386582	YOR143C	-0.486724	YLR221C	-0.625417
YGR163W	0.386369	YOL164W	-0.845414	YER030W	-0.739526
YDR351W	0.385791	YOR321W	-0.430383	YBL038W	0.686228
YAR015W	0.385651	YBL009W	-0.432513	YKR025W	-0.72973
YPL070W	0.384206	YKL016C	0.516262	YHR052W	-0.499448
YMR028W	0.38409	YNL027W	0.51534	YML129C	0.694693
YLR006C	0.383379	YPR164W	-0.545358	YAL060W	0.533814
YKL193C	0.382676	YOR250C	0.414355	YPL184C	-0.57766
YJL036W	0.382225	YOL045W	0.496794	YEL022W	-0.600737
YLL058W	0.381732	YER149C	-0.530705	YFR046C	1.07161
YPL031C	0.380936	YML018C	-0.725178	YLR399C	-0.514647
YKL171W	0.38051	YIL124W	0.649241	YHR108W	-0.445382
YGL085W	0.378778	YDL248W	0.343378	YOR292C	1.06906
YPL209C	0.378276	YLR346C	1.81127	YJL173C	-0.687862
YDR219C	0.377888	YNL021W	-0.471938	YBR138C	0.869567
YNL038W	0.377623	YGL050W	-0.527027	YOL016C	0.700082
YDR475C	0.377448	YBR085C-A	0.694296	YOR311C	-0.764327
YGR130C	0.377401	YHR097C	0.79556	YDR171W	1.9302
YPL104W	0.377121	YGL077C	0.378184	YOR340C	-0.490676
YNR032W	0.376967	YOL095C	-0.605754	YJL098W	-0.52736
YJL206C	0.376661	YBR282W	0.645998	YCL001W	0.550377
YDR323C	0.37648	YDR383C	0.790882	YNL278W	-0.804047
YMR094W	0.376249	YOR043W	0.402765	YMR023C	1.23661
YPL196W	0.374738	YPL225W	0.461563	YDR518W	-0.665642
YBR194W	0.374179	YOL122C	0.515952	YML017W	-0.538737
YML059C	0.373854	YBR204C	0.509362	YLR049C	0.615654
YBR235W	0.373731	YBR159W	-0.342455	YHR103W	-0.526894
YLR324W	0.373345	YHR072W	-0.46071	YLR270W	0.739182
YCL017C	0.372625	YDL058W	-0.434539	YIL073C	1.52333
YKR067W	0.371626	YFR045W	0.648588	YDR378C	-0.680628
YOR280C	0.371507	YJL099W	0.472619	YIR005W	1.27009
YLL040C	0.37139	YPL248C	0.901691	YGL021W	0.529343
YJL112W	0.371008	YDL226C	-0.323042	YOL117W	0.977953
YOL062C	0.370791	YJL052W	-0.383009	YML118W	1.68918
YGR253C	0.370696	YKR067W	0.520156	YDR011W	0.506374
YHR109W	0.370516	YOL124C	-0.700419	YEL009C	-0.45192
YIL135C	0.370509	YNL317W	0.460513	YIL071C	1.07476
YBR129C	0.370354	YGR070W	0.772375	YER012W	-0.529069
YHL002W	0.369933	YLR112W	-1.17732	YOR301W	-0.74907
YKL137W	0.369731	YLR287C-A	-0.34197	YMR284W	0.99576
YBR102C	0.369123	YDL040C	-0.353551	YFL010C	-0.473032
YDR235W	0.368875	YBR103W	0.443378	YGR153W	1.2775
YAR031W	0.367567	YFL030W	0.989624	YBR269C	0.748889
YOL018C	0.366899	YEL025C	-0.576317	YLR087C	-0.615883
YER142C	0.366469	YNL151C	-0.464461	YMR302C	0.527532
YDR076W	0.36631	YMR223W	-0.464157	YDR131C	0.970135
YPR106W	0.366251	YHR056C	-0.407456	YDL174C	0.496502
YNL045W	0.365167	YPL152W	0.506075	YMR031C	0.500126
YBR073W	0.362934	YDL024C	1.29329	YIR038C	0.632108
YDR034C	0.362396	YJL070C	0.62795	YJL199C	1.87526
YER087W	0.362261	YJR131W	-0.466957	YIL045W	1.12097
YHR002W	0.3619	YBR271W	-0.628778	YDL113C	0.803738
YGR142W	0.361723	YDL117W	0.404755	YJL183W	-0.539457
YFL017C	0.361212	YPL031C	0.488226	YDR481C	-0.486769
YGL162W	0.360743	YJL010C	-0.554979	YBR291C	0.676838
YER182W	0.360684	YDL184C	-0.463803	YMR022W	0.558308
YPL124W	0.36058	YPR020W	0.465114	YMR226C	-0.403871
YML011C	0.360124	YDR349C	-0.459469	YLL012W	-0.968683
YFL029C	0.359967	YDR440W	-0.55474	YCR035C	0.589543
YFR041C	0.359527	YPL057C	0.387838	YER076C	1.14033
YCR057C	0.359341	YIL098C	0.668765	YER079W	1.21376
YMR270C	0.359253	YER129W	-0.519119	YLR206W	0.565655
YMR257C	0.358291	YMR195W	0.574712	YJL151C	0.534995
YER017C	0.358127	YDR060W	-0.61189	YHL021C	1.94101
YNR023W	0.358056	YGL231C	0.416445	YKL218C	0.695703
YKL104C	0.357969	YGR179C	0.579539	YCL047C	0.812132
YGL197W	0.35785	YBR177C	0.413476	YIL149C	-0.580931
YPR042C	0.356867	YJR017C	-0.388693	YPR187W	-0.527002
YNL265C	0.35638	YDR289C	0.420181	YLL031C	-0.552455
YOR193W	0.356294	YNR067C	0.360273	YGR067C	1.94056
YDR213W	0.356098	YGL023C	-0.4642	YLR454W	0.495363
YFR027W	0.356073	YIL125W	0.338449	YDR238C	-0.408
YIL140W	0.355985	YLR408C	1.17036	YGR161W-C	0.783553
YDR061W	0.355982	YJR003C	-0.56702	YDR513W	0.566105
YAR028W	0.355027	YLR153C	-0.317752	YMR061W	-0.625607
YOR174W	0.354964	YMR308C	-0.467364	YNL182C	-0.55348
YOR264W	0.35485	YBR120C	0.767348	YLR382C	0.56984
YEL062W	0.35439	YBR165W	0.500345	YDR349C	0.535618
YGR076C	0.354328	YDR517W	-0.430055	YJR010W	-0.629795
YPL099C	0.353534	YDR143C	-0.442933	YGL193C	1.9997
YDR320C-A	0.353095	YEL024W	0.424581	YGL117W	0.735419
YMR268C	0.352932	YGR042W	-0.724657	YJL039C	-0.46451
YPL166W	0.352253	YDR217C	-0.634913	YMR251W-A	0.401517
YMR193W	0.351733	YEL053C	-0.575068	YHR080C	0.806161
YJL149W	0.35168	YBR281C	-0.358954	YIR016W	1.19232
YCL041C	0.351635	YHR133C	-0.355959	YER017C	0.455626
YJR138W	0.351295	YHR116W	0.806065	YEL005C	1.23553
YIL095W	0.351197	YLR231C	-0.526821	YBR147W	1.8075
YBR264C	0.350967	YPR101W	0.646091	YMR177W	-0.849017
YOR033C	0.350734	YOR231W	-0.462702	YDL060W	-0.486967
YGR282C	0.350216	YBR179C	0.422325	YIL120W	1.42641
YPR135W	0.349641	YLR392C	0.527523	YDR292C	-0.506262
YJL088W	0.349562	YIL103W	-0.437081	YLR446W	1.20237
YNL225C	0.349446	YOR176W	0.429311	YHR090C	0.807651
YJR089W	0.349271	YMR152W	0.517394	YOR066W	0.731548
YGR247W	0.348654	YMR207C	-0.686856	YGL062W	-0.530545
YDR282C	0.348449	YER055C	-0.34115	YKL068W-A	0.774401
YCL059C	0.348258	YMR229C	-0.501912	YMR100W	0.653805
YBR103W	0.347722	YNL156C	0.358637	YLL027W	0.705845
YPL057C	0.346905	YNL292W	-0.455207	YPL109C	1.00236
YOL073C	0.34641	YKR043C	-0.301579	YMR055C	1.07848
YGL003C	0.346186	YLR020C	-0.597561	YER163C	0.806436
YLR363C	0.346181	YNL259C	-0.643666	YKR021W	0.67892
YHL025W	0.345334	YER070W	0.420572	YOR158W	0.626304
YNL051W	0.345183	YGL043W	-0.346977	YCR024C-A	-0.627344
YLR298C	0.345027	YJR155W	0.950779	YMR056C	1.36865
YLR107W	0.344415	YDR527W	-0.617313	YCR083W	0.874431
YIL134W	0.343846	YLL014W	-0.468088	YJL093C	0.696091
YJR057W	0.343695	YAL002W	-0.488091	YPL144W	0.968879
YDR183W	0.343194	YDR381C-A	0.810169	YNL141W	-0.547882
YGL018C	0.342861	YOR326W	-0.348648	YLR025W	-0.626367
YDR485C	0.342222	YER013W	0.38316	YLR060W	-0.378684
YCR072C	0.342168	YGR096W	-1.04991	YNR068C	1.92797
YLR145W	0.342127	YPR024W	-0.356424	YBR184W	1.4502
YGR003W	0.341473	YPR079W	0.595329	YER109C	0.83237
YOR081C	0.340912	YDR257C	-0.40187	YPL211W	-0.623618
YJL053W	0.340883	YPR054W	-3.2883	YLL051C	0.725482
YDL001W	0.3404	YDL177C	-0.812031	YPL087W	0.649102
YEL004W	0.339832	YHR110W	-0.446574	YPL216W	0.96784
YOL068C	0.339827	YNL020C	0.487008	YAR002W	-0.581126
YGR102C	0.339303	YGR201C	-0.769401	YLL003W	0.869479
YDR257C	0.338329	YNL064C	-0.294437	YBR037C	0.71563
YGL041W-A	0.337324	YBL076C	-0.48103	YCL017C	0.424664
YKL075C	0.337147	YMR262W	0.564678	YDR414C	-0.859558
YLR369W	0.336437	YCR002C	0.312363	YOL138C	0.726716
YBR179C	0.336188	YMR092C	0.396063	YNL110C	-0.489443
YIL002C	0.336007	YPR013C	-0.722902	YAR027W	0.656943
YER139C	0.335964	YOR305W	-0.613736	YMR194W	-0.471599
YBR207W	0.335317	YHR024C	-0.38852	YDR519W	-0.586625
YBR236C	0.333723	YGR004W	-0.556837	YGL171W	-0.578013
YIL122W	0.332941	YDR451C	0.571877	YBR238C	-0.576052
YNR020C	0.332778	YNL183C	0.377913	YDR371W	0.764855
YDR272W	0.332251	YPL270W	-0.353374	YNL035C	-0.757878
YDR118W	0.332234	YDL089W	-0.55528	YMR043W	-0.633859
YDR283C	0.33221	YKL077W	-0.355381	YOR164C	-0.485881
YGL219C	0.332112	YHR032W	-0.392998	YER092W	0.737156
YOL072W	0.331075	YEL029C	-0.604191	YMR013W-A	-1.6725
YKR017C	0.330515	YLR097C	-0.557896	YLR285W	-0.654693
YGR199W	0.330342	YLR080W	0.889536	YPL263C	-0.484344
YIL046W	0.330331	YMR194W	-0.364183	YLL026W	1.21135
YKR086W	0.328532	YAL020C	-0.579355	YDR158W	-0.39324
YPR084W	0.328204	YKL039W	0.332369	YDL070W	-0.567478
YBR120C	0.327379	YHR086W	0.465252	YJR002W	-0.495077
YLR326W	0.325992	YML028W	-0.376398	YJL082W	0.679928
YDR073W	0.325802	YDR026C	-0.538188	YDL092W	-0.606507
YGL116W	0.323827	YPL116W	0.451567	YKL063C	-0.643043
YOR079C	0.323679	YJR112W-A	-0.901601	YPL030W	-0.637727
YPL075W	0.322231	YNL023C	-0.548514	YDR410C	-0.909842
YBR062C	0.321674	YDR255C	0.514918	YPR020W	0.50665
YFL013C	0.32162	YHR075C	0.704709	YPL158C	0.513233
YPR051W	0.321551	YLR005W	-0.441026	YDR194C	-0.485999
YGR100W	0.321543	YOR174W	-0.529265	YJR006W	0.646374
YOR352W	0.321285	YHR051W	0.410909	YDL236W	-0.465227
YBR161W	0.319736	YHR045W	-0.580867	YPL176C	0.50421
YER018C	0.319568	YGR239C	0.527013	YLR205C	0.628874
YJR058C	0.318899	YDR486C	0.471486	YKR078W	0.921189
YBR023C	0.31856	YPR139C	-0.442575	YOR065W	0.49447
YOR286W	0.318364	YML042W	0.990922	YOL055C	0.804714
YGR138C	0.316848	YAL008W	0.673157	YLR394W	1.00572
YPR047W	0.316845	YKL093W	1.27708	YNL002C	-0.487937
YBR007C	0.316453	YAL007C	-0.30911	YDR038C	0.399497
YML025C	0.31561	YDL167C	-0.676005	YGL059W	0.983066
YHR059W	0.315561	YOR009W	-0.887641	YDR459C	0.92975
YDL091C	0.315048	YDR194C	-0.350861	YOR046C	-0.437072
YLR137W	0.314303	YCR020W-B	-0.605429	YMR274C	-1.14716
YLR127C	0.314107	YEL040W	-0.454451	YFR014C	0.702303
YKL129C	0.313559	YGR251W	-0.624917	YCR069W	0.564578
YMR184W	0.312428	YNL211C	-1.08613	YHR196W	-0.555447
YDR409W	0.312056	YIL157C	0.521322	YOR375C	0.416036
YGR065C	0.312047	YIL144W	0.489283	YMR294W	0.92319
YOL069W	0.311981	YML048W	-0.315151	YJR100C	0.794644
YPR164W	0.311941	YDR164C	-0.427293	YHR016C	0.650111
YIL119C	0.311279	YJL079C	0.72395	YJL028W	-5.5965
YBL090W	0.311035	YIL145C	-0.375365	YNR034W	0.716664
YLR117C	0.311014	YJR161C	0.321499	YHR041C	-0.86837
YAL020C	0.310932	YHR096C	0.539429	YLR227C	1.22256
YMR285C	0.310884	YOR309C	-0.563803	YER044C-A	2.35486
YLR425W	0.310869	YKL132C	-0.91991	YHR200W	-0.475638
YKR064W	0.310663	YPL207W	-0.628391	YPL164C	1.04349
YGR072W	0.310118	YDL115C	0.479155	YER062C	0.535834
YPL006W	0.310069	YDL153C	-0.568704	YGL083W	-0.638321
YMR145C	0.309552	YOR378W	-0.968161	YDR438W	1.27846
YCR093W	0.308648	YKR056W	-0.592355	YOL103W	-0.602783
YLR128W	0.308011	YKR022C	-0.629125	YGR279C	-0.381106
YER073W	0.307866	YIL142W	-0.307024	YDR301W	-0.569303
YOR228C	0.307791	YLR059C	-0.411411	YGR036C	-0.840639
YBR246W	0.307756	YOR153W	0.453507	YOR317W	0.546987
YDR047W	0.307715	YHR090C	0.518301	YNR067C	-0.507841
YKL185W	0.307397	YCL059C	-0.415573	YDL127W	-0.908519
YDR186C	0.307073	YGL128C	0.633402	YPL150W	0.634886
YBR083W	0.306864	YGL196W	0.377467	YNL271C	-0.487623
YDL160C	0.306793	YGR061C	-0.518188	YDR143C	-0.620092
YJR084W	0.306291	YMR183C	-0.352194	YOL077C	-0.447349
YGR029W	0.305967	YER107C	-0.359929	YMR120C	0.794775
YNL214W	0.305619	YPR145W	-0.544182	YIL160C	3.77466
YPL116W	0.305339	YBR251W	0.421297	YDR444W	0.731735
YNR049C	0.304374	YJL025W	-0.604705	YOR108W	-0.408272
YAR042W	0.304124	YKL210W	-0.287346	YGR109C	0.989399
YDR539W	0.302063	YLR173W	0.513427	YKL027W	-0.557202
YLR224W	0.301769	YHR059W	0.572568	YHR147C	0.643192
YLR146C	0.301442	YKL137W	0.5947	YER053C-A	0.651125
YLR442C	0.300796	YOL088C	-0.362672	YGL190C	-0.537021
YCR033W	0.300785	YJL077W-B	-0.680171	YOR008C	-0.527001
YPR180W	0.30003	YBR253W	-0.559971	YFL025C	-0.668246
YBL015W	0.299499	YPR115W	-0.418935	YPL010W	-0.491946
YOL087C	0.299361	YLR175W	-0.407744	YGL019W	-0.546581
YNL293W	0.299175	YBR154C	-0.332146	YJR135C	1.25436
YPR056W	0.298885	YPL109C	0.663953	YHR205W	-0.455291
YLR356W	0.298675	YMR122W-A	0.385125	YGL071W	-0.77581
YJL025W	0.298585	YKR103W	-0.662519	YLR009W	-0.509379
YNL008C	0.298361	YDR272W	0.4172	YOR018W	0.711153
YER060W-A	0.297977	YJL157C	0.385677	YJR153W	1.66434
YCR087C-A	0.297873	YJL162C	-0.600195	YPL056C	-2.0884
YPR010C-A	0.297754	YLR054C	1.10438	YNL187W	1.19343
YFL028C	0.297368	YOR298W	-1.68466	YAR003W	-0.765134
YLR294C	0.297014	YMR131C	-0.468847	YPL049C	-0.531356
YGL064C	0.296915	YNL242W	0.414283	YDL074C	-0.474562
YNL032W	0.296868	YGL198W	0.414096	YML119W	0.669629
YML004C	0.296488	YJR040W	-0.391793	YDR517W	-0.625423
YGL038C	0.296274	YIL008W	-0.416077	YGR220C	0.551583
YPL097W	0.296165	YER101C	0.560876	YNL159C	0.734949
YDL142C	0.295795	YDR292C	-0.382126	YGR088W	2.52135
YOR329C	0.29549	YKL110C	-0.478209	YLR186W	-0.496486
YOL081W	0.295019	YHR117W	-0.405443	YPL095C	1.08725
YIL003W	0.294854	YKL023W	0.56519	YKL208W	0.964922
YDR174W	0.294681	YMR172W	-0.479008	YNL123W	-0.414408
YNL136W	0.294042	YJL178C	-0.352673	YOR215C	0.620606
YNL158W	0.293961	YOR196C	-0.422536	YGL185C	0.834714
YNL127W	0.293914	YBR045C	-0.806489	YGR075C	1.07375
YPL096W	0.293026	YDR493W	0.588342	YOL053W	0.783472
YHR158C	0.292665	YLR174W	0.761027	YGR253C	0.402719
YJR142W	0.292059	YML014W	-0.466999	YHR117W	-0.473877
YDR320C	0.291849	YJL082W	0.453957	YGR133W	1.00359
YPL140C	0.291689	YOL113W	0.547287	YJR041C	-0.519442
YHR028C	0.29089	YOL055C	0.488084	YBL024W	-0.379472
YDR375C	0.290465	YPL265W	0.399694	YOR326W	-0.389453
YDR462W	0.290387	YIL038C	-0.317028	YKR084C	-0.527053
YPR107C	0.290307	YPL194W	-0.652586	YFL055W	1.38805
YOR087W	0.290213	YGL119W	-0.416258	YFR019W	0.507039
YJL091C	0.290075	YOR070C	0.386156	YPL189C-A	0.836464
YOR297C	0.289704	YNL290W	-0.376606	YDR435C	0.771237
YMR238W	0.289453	YGR001C	-0.344411	YLR299W	0.518944
YKR054C	0.28908	YMR094W	-0.703088	YDL233W	0.741132
YML109W	0.288948	YER145C	-0.618694	YMR063W	1.16482
YDR197W	0.288886	YPL115C	-0.367609	YMR301C	-0.546296
YKL047W	0.288734	YNL048W	-0.442607	YER050C	0.619438
YMR048W	0.288429	YJR085C	0.493371	YPL183C	-0.47242
YNL309W	0.288408	YBR024W	0.6114	YNL222W	0.662061
YBR131W	0.287256	YLR257W	0.444239	YER132C	-0.604897
YPL224C	0.286144	YBR044C	-0.438869	YOL094C	-0.63511
YGL198W	0.285652	YDL031W	-0.533332	YGL212W	0.900119
YGL151W	0.285627	YBL040C	0.333973	YOR104W	0.747651
YDL101C	0.28449	YIL129C	-0.389847	YLR284C	1.31082
YHR118C	0.2844	YLR197W	-0.450689	YNL168C	-0.56079
YKL197C	0.284343	YOL085C	3.15231	YMR267W	0.564194
YML121W	0.281573	YNL241C	-0.371534	YMR110C	0.616236
YLR118C	0.281458	YEL016C	-0.56398	YMR204C	1.03425
YLR370C	0.280668	YGR264C	-0.474006	YFR022W	0.962297
YJL068C	0.280327	YGR027C	-0.318055	YOR077W	1.06884
YGR220C	0.279794	YPR098C	0.546683	YPL215W	0.578114
YDR115W	0.278898	YNL144C	0.794928	YDR380W	1.66786
YHR076W	0.278775	YDR006C	0.419195	YJL144W	1.42338
YDR369C	0.277843	YKR079C	-0.563802	YOR023C	0.635214
YHR077C	0.277267	YGR224W	2.13772	YLR121C	0.599145
YGR099W	0.276573	YDR035W	-0.302044	YDL126C	-0.337919
YER147C	0.275953	YFL002C	-0.562183	YDR422C	-0.549615
YDR405W	0.275759	YDL085C-A	-0.551235	YOR244W	0.705906
YKR016W	0.275744	YDL208W	-0.371078	YNR032C-A	-0.988096
YLR078C	0.275699	YJR011C	0.642664	YPL171C	2.79898
YJL180C	0.27541	YPR159W	0.270822	YPR065W	-0.53594
YMR029C	0.27524	YIL089W	-1.33475	YDR296W	0.581342
YDL105W	0.273634	YNL016W	-0.300363	YNL006W	0.54886
YHR040W	0.273249	YPL018W	-0.417081	YPL245W	-0.721016
YKL034W	0.272239	YBR201W	0.558243	YLR084C	-0.503945
YDR080W	0.272197	YCL008C	-0.435569	YGL106W	-0.441841
YPL132W	0.271442	YPL196W	0.612001	YJR118C	-0.821835
YDL029W	0.270928	YNL202W	1.40479	YDL119C	0.838935
YMR037C	0.270924	YIR026C	-0.506394	YNL331C	1.22226
YOR113W	0.270566	YLR411W	-1.36145	YHR129C	0.802954
YDR100W	0.270472	YML012W	-0.304817	YKL044W	-2.43482
YDR089W	0.267158	YOL077C	-0.381031	YBR112C	-0.457792
YKL007W	0.266549	YCR045W-A	-0.738918	YMR030W	1.12156
YGL013C	0.265909	YNL030W	0.293399	YBR267W	-0.56092
YJR005W	0.265754	YNR035C	0.35162	YDR490C	0.651234
YMR036C	0.26546	YMR075W	-0.464467	YMR047C	-0.427504
YPL135W	0.265433	YHL030W	0.313725	YNL090W	-0.739715
YNL193W	0.265364	YJL127C	-0.541427	YHR022C	2.19192
YMR261C	0.264536	YGL171W	-0.507594	YDL198C	-0.436612
YDR026C	0.264258	YPL226W	-0.439305	YDL157C	-0.637111
YOR179C	0.263726	YDR165W	-0.567503	YOL025W	-0.973017
YOR126C	0.263013	YKL208W	0.667784	YDR525W-A	0.625489
YPR101W	0.262366	YGL173C	-0.257983	YOR052C	0.539334
YOR191W	0.261809	YLR089C	0.387126	YDL020C	0.519775
YDR473C	0.261236	YOR389W	-0.596141	YGR128C	-0.541816
YIL105C	0.261199	YLR069C	0.434802	YAL002W	0.651385
YGL194C	0.260848	YLR219W	0.435893	YKL148C	0.592119
YDR493W	0.259385	YLR227C	-1.01328	YFR051C	-0.406726
YLR375W	0.259116	YKL088W	0.431275	YDL227C	-1.2251
YGR165W	0.258487	YGL184C	0.513832	YAL034C	0.832273
YLR105C	0.258051	YOR371C	-0.501052	YGL247W	0.999318
YDR200C	0.257617	YER120W	-0.322226	YLR351C	-0.477495
YBR014C	0.256251	YFR027W	0.581646	YDL040C	-0.38426
YBL017C	0.255885	YHR038W	0.571537	YLR412C-A	-9.38543
YNL176C	0.255754	YKR071C	-0.322787	YPR173C	0.481137
YLR277C	0.254404	YLL022C	-0.398556	YLR055C	-0.601451
YPR178W	0.253943	YLR369W	0.362519	YMR276W	-0.421882
YOR043W	0.253747	YNL078W	0.399045	YBR109C	-0.376665
YKR063C	0.253472	YNR048W	-0.522939	YJR062C	0.612258
YKR093W	0.252579	YGR040W	-0.392883	YHR149C	-0.53521
YBR153W	0.252531	YMR193W	0.485248	YDL012C	-0.628418
YOR306C	0.252497	YIL132C	-0.889359	YDR540C	-1.67898
YNL221C	0.252353	YLL049W	-0.681504	YER162C	0.851012
YMR074C	0.251711	YMR239C	-0.668123	YOL152W	-1.19449
YNR007C	0.251168	YNL050C	-0.416722	YBR024W	0.840016
YKL167C	0.250269	YML077W	-0.465395	YIL125W	0.503632
YOR324C	0.249044	YAL001C	0.353741	YLR247C	0.608799
YOL140W	0.248598	YDR430C	0.327762	YHR036W	-0.783281
YLR253W	0.248573	YOR191W	-0.331908	YLR096W	-0.49737
YHR017W	0.248478	YDR339C	0.45069	YKR026C	-0.474445
YBL103C	0.246936	YPL118W	0.362772	YER091C	-0.818098
YKL116C	0.246761	YGR259C	2.49575	YOR275C	0.60305
YOL026C	0.246655	YDR436W	0.502798	YOR021C	-0.435921
YDR175C	0.246296	YEL017W	0.39578	YNL104C	0.425673
YGR112W	0.246281	YDR434W	-0.312816	YDR476C	-0.614201
YDR494W	0.246069	YNL195C	0.990804	YML025C	0.514453
YLR274W	0.24568	YFL038C	0.302791	YHL007C	-0.46996
YNL240C	0.245148	YPL138C	0.468742	YGL001C	-0.432138
YDL175C	0.243551	YLR410W	0.316419	YMR145C	0.444583
YJL085W	0.243103	YLR285W	-0.366124	YIL016W	-0.640163
YDR006C	0.242076	YPL218W	-0.27006	YDL123W	-0.85254
YKL105C	0.2418	YCR094W	-0.373559	YLR233C	1.12094
YPL202C	0.241019	YGR276C	-0.369244	YGR130C	0.490495
YGR056W	0.240989	YGR203W	0.413834	YDL002C	-0.663906
YIL034C	0.240709	YOR295W	-0.697995	YBR108W	0.595735
YPL260W	0.239965	YLR413W	-0.509916	YBL080C	0.880068
YLR021W	0.239844	YMR162C	-0.403276	YKR067W	0.564613
YDR423C	0.239636	YHL038C	-0.418988	YFR049W	-0.715661
YDR411C	0.23942	YJR140C	-0.412637	YJL069C	-0.464496
YDR452W	0.239293	YNL287W	-0.264298	YDL053C	-0.567741
YBR059C	0.239251	YGL044C	0.377131	YMR085W	2.00006
YER070W	0.238977	YER128W	-0.712054	YLR108C	-0.97083
YGR117C	0.238522	YCL025C	0.407306	YJR132W	-0.437283
YNR033W	0.238318	YPL166W	0.58709	YLR074C	-0.596071
YAR019C	0.238165	YJL172W	0.281059	YJR075W	-0.505857
YPL159C	0.237773	YPR055W	0.438715	YOL009C	0.954706
YJL102W	0.237717	YER188W	-1.6951	YHR084W	-0.525855
YNL306W	0.236877	YPR002C-A	-0.500275	YKR095W	-0.424098
YPR055W	0.236756	YBR079C	-0.371387	YGR110W	1.31971
YOR298C-A	0.236622	YPR129W	-0.394035	YJL073W	-0.643522
YNL103W	0.23651	YIL040W	0.466149	YBR203W	0.744277
YDR032C	0.236451	YLR294C	0.578417	YLR031W	2.8934
YMR211W	0.236245	YCL054W	-0.500375	YOR028C	0.751582
YBL005W	0.236213	YIL033C	0.346027	YML052W	-0.444731
YKL195W	0.235607	YJL006C	0.495058	YIR003W	0.485423
YDL108W	0.23519	YOR078W	-0.46309	YOL004W	-0.375273
YBR069C	0.234138	YPL249C	0.459062	YOR368W	0.827977
YDR246W	0.233724	YMR305C	-0.318559	YBR099C	-2.36381
YKL012W	0.233619	YDL219W	-0.350618	YBR054W	0.641598
YGR063C	0.232731	YGL010W	0.79927	YKL141W	0.660429
YPL256C	0.231877	YMR106C	-0.55871	YMR015C	-0.431558
YBL033C	0.231636	YIL140W	0.295308	YMR292W	-0.77032
YOR211C	0.23128	YGR037C	-0.321116	YPR046W	0.965937
YDR288W	0.230774	YJL048C	0.429736	YMR299C	0.882124
YGR157W	0.22988	YJR154W	0.795724	YIL055C	0.990238
YNL129W	0.22984	YPL260W	0.365454	YML077W	-0.762537
YDR533C	0.229361	YER131W	-0.247067	YGL211W	0.577142
YKL022C	0.229356	YOR001W	-0.478343	YMR137C	1.08333
YLR248W	0.229283	YJL087C	-0.423857	YKL187C	1.32247
YKL194C	0.228969	YMR212C	-0.365307	YLR389C	-0.471589
YER069W	0.228044	YMR233W	0.445483	YLR094C	0.586952
YHR078W	0.227988	YLL003W	-0.505612	YIL051C	-0.398937
YPL188W	0.227251	YJR113C	0.329547	YDL077C	0.557938
YOL075C	0.226816	YLL031C	-0.351518	YMR310C	-0.628576
YBR123C	0.226746	YNL121C	-0.324754	YFR041C	0.574266
YDR508C	0.226437	YMR052W	0.680738	YML058W-A	-2.78175
YMR024W	0.22631	YER180C	-0.751439	YMR288W	-0.626416
YDL147W	0.225615	YJL180C	0.447168	YBL055C	-0.627349
YBR058C	0.224383	YNL133C	0.65578	YOR360C	-0.543736
YOR124C	0.224227	YKL174C	-0.397207	YDR379C-A	1.46413
YNL297C	0.224158	YOR315W	-0.367631	YHR027C	-0.376274
YMR076C	0.223817	YDR324C	-0.514007	YPR155C	0.629803
YKL139W	0.223488	YBR023C	0.366845	YJL133W	-0.685656
YOR250C	0.223225	YNR049C	0.475193	YMR014W	-0.544257
YPL118W	0.222474	YKR019C	-0.617518	YMR044W	-0.64013
YNL317W	0.222327	YCR044C	-0.378692	YPR143W	-0.645135
YLR387C	0.221741	YBR197C	-0.458162	YHR107C	-0.425601
YLR187W	0.21905	YDR020C	-0.721016	YNR053C	-0.434861
YMR013C	0.21905	YDR129C	0.340226	YDR041W	0.532517
YLR350W	0.218118	YCR007C	0.851132	YGL191W	0.464811
YDR162C	0.21807	YDR405W	0.417102	YLR098C	0.747464
YKL126W	0.217021	YBR284W	0.813268	YMR214W	-0.497449
YHL038C	0.216276	YNL212W	0.309868	YPL247C	0.696358
YMR319C	0.215541	YPR196W	-0.80763	YER048C	-0.427699
YLR131C	0.214566	YFL013C	0.360405	YLR144C	0.578381
YBR170C	0.21452	YDL181W	0.611902	YER122C	-0.434929
YHR001W	0.214095	YCL039W	0.386016	YIL007C	0.804409
YHR112C	0.212986	YDL044C	0.422415	YBR192W	-0.613886
YLR163C	0.211242	YHR073W	-0.350662	YKL185W	0.413731
YDL086W	0.210371	YGR237C	0.546106	YER035W	0.678861
YNL252C	0.209745	YDR495C	0.428514	YDR304C	-0.40193
YOL089C	0.209007	YOL017W	0.408937	YBR166C	0.459373
YOR025W	0.208725	YPL085W	-0.307092	YOR223W	0.795688
YIR036C	0.208397	YLR133W	0.399337	YOR086C	-0.411296
YDR329C	0.208392	YLR337C	0.483933	YOL041C	-0.435913
YCR012W	0.207582	YPR106W	0.416443	YDR381C-A	1.01444
YCL054W	0.206651	YBR262C	0.4908	YKL077W	-0.405238
YBR200W	0.20519	YMR158W	0.484755	YML005W	0.696034
YNL081C	0.205185	YIL063C	-0.467954	YHR148W	-0.57299
YER093C	0.204244	YER156C	-0.342441	YGR155W	-0.326572
YLR257W	0.203367	YFL001W	-0.54874	YBR125C	-0.633902
YPR188C	0.202698	YGR076C	0.541879	YDL167C	-0.487746
YKL215C	0.202047	YIL056W	-0.393831	YDR272W	0.476969
YKL094W	0.201816	YIL143C	-0.342244	YHR161C	0.582833
YNR013C	0.201348	YER034W	0.432779	YJL013C	0.837328
YPR169W	0.199841	YOL094C	-0.357833	YKR049C	0.876488
YDR322W	0.198766	YMR049C	-0.484797	YGR091W	-0.78374
YML007W	0.198004	YIL088C	-0.328239	YDL027C	0.863945
YGR113W	0.197102	YCL030C	-0.402011	YPL115C	-0.490442
YCL044C	0.196508	YGL011C	0.277475	YDR214W	0.398021
YOL129W	0.196225	YPL084W	0.300803	YBL051C	-0.445951
YKL039W	0.195223	YPR108W-A	-1.47314	YCL048W	2.37622
YGR232W	0.195125	YCR042C	0.311784	YOR177C	1.49315
YLR115W	0.194756	YDR367W	-0.340454	YNL143C	1.01387
YLR100W	0.193767	YER092W	0.409685	YOL148C	0.574505
YNL166C	0.192863	YBL085W	-0.36453	YDR364C	0.622291
YNL231C	0.192446	YNL090W	-0.394749	YOR389W	0.824509
YLR130C	0.191108	YPR041W	-0.297167	YPL177C	0.483191
YML013W	0.190848	YER114C	-0.332294	YBL047C	-0.359403
YIL156W	0.190203	YKR048C	-0.290215	YBR016W	-0.580061
YMR115W	0.190053	YJR117W	-0.332479	YGL139W	-0.447508
YBL016W	0.189912	YMR052C-A	1.69949	YOL100W	0.638134
YPR154W	0.187936	YGL226C-A	-0.389878	YNL249C	0.847844
YHR208W	0.187695	YPL242C	0.302709	YPL266W	-0.448586
[truncated: 3,494 more rows]
