# Supplementary material for: Decapping factor Dcp2 controls mRNA abundance and translation to adjust metabolism and filamentation to nutrient availability
Source: eLife journal article supplement (doi:10.7554/elife.85545), 2023-06-02
Supplement: fig1-figsupp2-data1 [file Figure 1 – figure supplement 2 – source data 1.xlsx]

## Sheet: data reproducability
gene_ID	ribo_dcp2_1_fp_count.txt	ribo_dcp2_2_fp_count.txt	ribo_dcp2-EE_1_fp_count.txt	ribo_dcp2-EE_2_fp_count.txt	ribo_WT_1_fp_count.txt	ribo_WT_2_fp_count.txt	RNA_dcp2_1_count.txt	RNA_dcp2_2_count.txt	RNA_dcp2-EE_1_count.txt	RNA_dcp2-EE_2_count.txt	RNA_WT_1_count.txt	RNA_WT_2_count.txt
YAL067C	2.7904	1.89297	1.47921	0.661678	0	0.826392	1.84972	0.314722	1.34933	2.52776	5.58065	4.79147
YAL063C-A	0	0	0	0	0	0	2.21966	2.51777	2.24888	3.53886	1.74395	1.36899
YAL063C	2.7904	0	6.28664	3.30839	2.35809	6.61114	142.428	144.457	102.999	116.024	48.1331	46.2035
YAL054C	6.69697	1.89297	6.28664	3.97007	3.93015	6.61114	22.5665	23.2894	25.6372	27.2998	13.6028	18.1391
YAL049C	152.914	157.117	133.499	125.719	116.332	142.69	81.0175	98.8227	70.165	93.7797	86.1512	80.7705
YAL047C	20.0909	5.67892	23.2975	25.1438	35.3714	34.9839	29.5954	35.2488	18.8906	42.9718	28.252	22.5884
YAL046C	44.0884	30.2876	40.3084	29.7755	29.0831	39.9423	20.7168	20.4569	30.135	27.5525	30.3448	32.5136
YAL044C	282.389	253.659	272.914	274.596	255.46	242.684	118.012	154.843	126.387	144.082	140.911	151.958
YAL043C	121.103	111.686	144.223	125.719	139.913	165.554	169.434	171.209	178.561	144.335	134.284	146.824
YAL040C	80.9217	62.4682	34.0218	22.4971	49.5199	35.8103	252.671	288.915	217.242	250.248	178.232	223.488
YAL039C	240.533	276.374	174.916	131.674	164.28	165.829	61.7805	69.8682	55.7722	52.0718	87.1976	119.445
YAL037C-A	0	0	0	0	0	0	0	0	0	0	0	0
YAL036C	156.821	157.117	201.542	186.593	208.298	227.258	128.37	125.574	128.636	138.268	112.659	99.2519
YAL034C-B	0	0	0.369802	0	0	0.275464	0	0	0	0	0.34879	0.342248
YAL034C	12.8359	15.1438	25.5164	20.512	25.153	23.139	57.3412	58.2235	47.2264	50.5551	24.7641	35.5938
YAL032C	33.4848	26.5016	32.5426	22.4971	33.0133	31.9538	29.2255	28.9544	21.5892	24.0137	15.3468	24.9841
YAL031C	32.9268	17.0368	29.2144	21.1737	25.939	26.9955	54.7516	60.7413	36.8816	56.6217	51.2722	52.3639
YAL029C	73.6666	58.6822	61.3872	41.024	42.4456	67.7642	206.058	220.305	120.54	255.809	233.341	205.007
YAL026C-A	3.90656	0	2.95842	2.64671	1.57206	2.75464	9.24858	14.1625	6.29686	14.4082	14.998	15.7434
YAL026C	87.6186	51.1103	84.6847	72.1229	63.6684	85.1184	164.995	180.965	145.727	201.462	193.927	186.525
YAL025C	112.174	115.471	171.958	156.156	181.573	203.017	94.7054	73.9596	64.3179	126.893	61.7359	49.9682
YAL024C	33.4848	18.9297	22.9277	17.2036	22.7949	23.9654	39.214	56.0205	24.7377	57.1273	79.1754	57.1554
YAL023C	478.275	363.451	348.724	297.755	301.05	375.733	484.995	480.58	513.644	436.796	555.274	609.544
YAL022C	93.1995	87.0768	69.5228	71.4612	71.5287	84.0166	113.573	107.95	126.387	120.574	85.8024	102.674
YAL021C	268.995	221.478	253.315	203.797	263.32	279.045	224.185	210.864	239.73	213.595	261.593	267.638
YAL020C	14.5101	13.2508	16.2713	14.5569	15.7206	15.7015	33.6648	33.6752	27.8861	28.0581	17.4395	20.5349
YAL018C	1.11616	0	0.369802	0	0	0.826392	0	0.314722	1.34933	1.0111	0.697581	0.342248
YAL015C	23.4394	34.0735	40.6782	38.3773	33.7993	38.2895	40.3238	45.9494	36.8816	44.994	38.7157	31.4868
YAL014C	31.8106	18.9297	32.1728	38.3773	44.8037	43.2479	58.0811	51.6144	52.6237	48.7857	28.6008	33.8826
YAL010C	30.1364	18.9297	32.9124	30.4372	43.2317	32.2293	34.7746	45.3199	31.9341	41.2024	26.8569	28.0643
YAL007C	183.609	168.475	112.05	97.2667	113.188	131.947	94.7054	72.0713	91.7542	93.0214	106.73	107.124
YAL005C	4831.3	5692.18	4929.46	5943.85	5255.4	4709.89	5267.99	5189.76	5815.6	5007.74	5116.75	5539.63
YAL001C	51.3434	41.6454	52.1421	46.3175	51.092	57.2965	71.7689	89.381	34.6327	106.671	77.4315	66.3961
YAR002C-A	239.975	191.19	154.208	172.036	123.407	170.237	136.139	128.721	138.981	142.565	170.21	167.017
YAR007C	228.813	196.869	257.752	236.219	253.888	264.721	146.127	147.919	143.029	182.757	130.796	121.84
YAR014C	95.9899	90.8628	87.2733	64.1828	84.8912	88.424	125.411	126.518	89.5053	120.574	103.591	94.1182
YAR018C	62.505	58.6822	61.0174	63.5211	78.603	68.3151	84.717	67.9799	83.2085	85.4381	88.5927	62.2891
YAR019C	19.5328	11.3578	23.2975	21.1737	23.5809	12.9468	61.7805	61.6855	51.7242	54.8523	42.5524	66.7384
YAR023C	0.558081	0	1.47921	0	0.78603	0.826392	10.3584	14.4772	10.7946	14.9138	5.58065	4.10698
YAR047C	0	0	0	0	0	0	0	0	0	0.252776	0	0
YAL066W	0	0	0.369802	0	0	0	0	0	0	0	0.34879	0
YAL064W-B	0	0	0.369802	0	0	0	7.39886	7.2386	6.29686	6.31939	3.83669	4.10698
YAL062W	7.25505	18.9297	34.3916	29.1138	22.0088	28.9237	15.1677	50.0408	50.8246	40.6969	39.7621	39.3585
YAL061W	23.9975	9.46487	31.0634	26.4671	22.0088	20.1089	20.7168	29.8986	19.3404	23.2553	12.9052	18.8236
YAL060W	172.447	140.08	213.376	231.587	250.744	229.186	203.469	174.041	192.504	186.548	118.589	149.22
YAL059W	60.8308	79.5049	82.0961	79.4014	64.4545	99.1671	38.1041	42.1727	53.0735	48.5329	26.1593	29.4333
YAL058W	32.3687	28.3946	24.0371	23.8204	20.4368	25.0672	58.0811	54.4469	54.8726	49.544	51.9698	56.4709
YAL056W	23.4394	9.46487	44.3763	25.1438	35.3714	24.7918	91.3759	108.894	74.213	110.463	90.6855	71.1876
YAL055W	13.3939	5.67892	14.4223	11.9102	16.5066	14.3241	8.13875	10.3858	10.3448	14.9138	8.02218	4.44922
YAL053W	296.341	198.762	350.942	273.273	245.241	324.772	477.966	575.941	532.984	492.912	329.607	363.81
YAL051W	42.9722	34.0735	56.5797	39.039	47.1618	52.6136	71.0291	95.046	80.9596	97.3186	64.5262	55.7864
YAL047W-A	0	0	0	0	0	0.275464	0.369943	0.314722	0	0.505551	0.34879	0
YAL044W-A	61.3889	34.0735	49.1837	51.6109	54.2361	52.3382	38.844	38.0813	33.7332	36.3997	33.1351	49.626
YAL042W	196.444	164.689	155.687	148.216	155.634	171.063	173.133	166.488	218.591	167.337	185.905	226.568
YAL041W	71.4343	60.5752	78.3981	63.5211	77.817	85.1184	105.434	107.635	80.0601	114.002	101.149	96.8562
YAL038W	6887.83	9374.01	4756.4	6252.2	5801.69	5017.3	7503.92	6289.09	8146.79	5611.36	10218.9	10563.5
YAL037W	3.34848	1.89297	1.47921	0.661678	2.35809	1.92825	5.91909	5.35027	2.24888	3.79163	3.13911	5.13372
YAL035W	735.55	798.835	990.7	901.867	1024.2	1038.78	617.805	636.997	510.495	682.241	688.512	589.009
YAL034W-A	17.8586	18.9297	19.5995	25.1438	16.5066	24.2408	11.0983	12.9036	8.99551	13.9027	11.5101	8.89845
YAL033W	39.0656	47.3244	41.7877	46.3175	43.2317	50.1345	32.9249	36.8225	26.5368	39.6858	30.6935	40.043
YAL030W	57.4823	49.2173	66.5644	52.2726	51.092	68.866	26.266	25.1777	33.7332	26.2887	34.5302	44.8345
YAL028W	8.92929	0	9.61486	4.63175	6.28824	9.36578	31.4452	32.7311	17.5412	23.0026	14.3004	17.7969
YAL027W	24.5555	22.7157	26.9956	21.1737	20.4368	25.3427	19.237	17.9391	18.8906	24.2665	16.3931	17.4546
YAL019W	119.429	117.364	157.536	125.719	150.918	170.788	206.428	183.798	148.876	216.881	162.885	138.953
YAL017W	126.684	75.719	151.619	137.629	132.839	133.325	232.324	266.255	200.6	239.631	187.3	202.269
YAL016W	327.035	289.625	417.137	365.246	393.015	424.49	274.128	274.752	276.612	288.67	226.365	236.151
YAL013W	51.3434	53.0033	68.0436	48.9642	64.4545	68.0396	49.5724	47.8377	49.4753	38.9274	41.8548	42.781
YAL012W	930.32	895.377	918.219	905.837	850.485	826.668	501.273	555.799	558.172	487.857	517.605	567.789
YAL011W	24.5555	18.9297	27.3654	16.542	25.153	31.6784	37.3642	33.3605	25.6372	37.158	19.1835	23.6151
YAL009W	10.0455	11.3578	11.4639	12.5719	12.5765	9.91671	29.9654	22.9747	20.6897	26.2887	26.5081	20.5349
YAL008W	57.4823	49.2173	48.4441	43.6708	44.0177	42.146	14.0578	21.0864	14.8426	17.4415	34.879	30.8023
YAL004W	0	0	0	0	0	0	0	0	0	0	0.34879	0
YAL003W	1445.43	1724.5	1112	1313.43	1226.21	1132.16	1014.01	949.516	1038.98	906.959	1450.27	1419.64
YAL002W	23.4394	18.9297	27.3654	19.1887	29.8691	26.1691	136.879	141.94	72.8636	126.388	76.7339	87.9577
YAR002W	158.495	134.401	171.588	142.261	217.73	172.716	93.2256	107.005	96.7018	97.3186	97.6613	82.1395
YAR003W	27.3459	22.7157	29.2144	17.8653	21.2228	26.1691	32.9249	33.99	35.5323	37.9163	33.4839	31.4868
YAR008W	10.6035	9.46487	19.5995	26.4671	21.2228	20.9353	24.0463	24.5483	13.943	26.0359	16.0444	11.6364
YAR015W	126.126	98.4347	154.208	152.848	158.778	196.406	95.8152	90.3252	107.496	105.66	83.7097	84.193
YAR019W-A	0	0	0.369802	0	0	0	0.739886	0	0.449776	0.505551	1.39516	0.342248
YAR027W	81.4798	53.0033	96.5184	93.9583	114.76	100.82	91.3759	71.4419	69.2654	79.1187	50.9234	67.4229
YAR028W	17.8586	24.6087	49.1837	37.054	37.7294	45.727	31.8151	25.8072	29.6852	31.8497	19.881	17.7969
YAR029W	0	0	0	0	0	0	2.5896	2.20305	0.899551	2.52776	2.44153	0
YAR031W	16.1843	24.6087	27.7352	21.1737	24.3669	26.4446	17.7573	17.6244	19.7901	21.4859	12.9052	11.9787
YAR033W	20.0909	7.5719	18.8599	19.8503	30.6552	25.6182	22.9365	15.7361	21.5892	16.1776	12.5565	13.3477
YAR035W	5.58081	3.78595	6.65644	5.29342	3.93015	3.58103	14.4278	14.4772	16.1919	13.9027	11.8589	15.0589
YAR042W	82.5959	64.3611	97.258	83.3714	101.398	109.91	168.324	167.432	129.985	168.096	156.258	161.541
YAR050W	3.90656	0	2.58862	0.661678	0.78603	2.20371	210.868	202.051	162.819	166.579	68.3629	73.2411
YAR053W	0	1.89297	0	0	1.57206	0.275464	1.47977	2.51777	0.899551	1.76943	2.09274	0.684496
YAR071W	31.2525	32.1806	14.0525	15.8803	24.3669	14.3241	59.1909	62.0002	58.0211	60.4134	53.3649	58.5244
YBL113C	76.457	71.933	66.5644	50.9492	57.3802	74.9262	1772.77	1865.36	1195.5	1614.48	1266.11	1299.86
YBL107C	51.9015	47.3244	51.0327	41.6857	33.7993	50.6854	32.555	35.2488	19.3404	35.1358	36.623	33.8826
YBL106C	11.7197	17.0368	2.58862	5.29342	11.0044	9.64124	41.0637	32.7311	40.9296	42.4663	33.4839	35.936
YBL105C	73.6666	60.5752	89.1223	74.1079	96.6817	85.1184	166.104	161.452	88.6058	181.24	151.724	131.765
YBL104C	39.6237	26.5016	36.9802	27.1288	37.7294	42.146	95.4453	83.0866	74.213	85.6909	70.1069	62.9736
YBL103C	44.0884	56.7892	80.6169	71.4612	92.7515	87.5976	59.9308	68.2946	38.6807	71.5355	33.8327	39.0163
YBL101C	78.6894	47.3244	62.1268	41.024	66.0265	55.3683	99.5147	118.965	75.1125	96.5603	143.004	157.434
YBL093C	63.0631	54.8963	68.0436	55.581	101.398	81.2619	48.4625	34.9341	32.8336	39.433	28.6008	32.1713
YBL091C-A	25.1136	15.1438	28.4748	23.8204	27.5111	31.4029	15.1677	20.4569	18.4408	15.1665	11.8589	11.6364
YBL091C	219.326	198.762	262.929	219.677	242.883	285.932	170.174	154.214	161.02	130.179	144.748	151.616
YBL088C	10.6035	13.2508	11.0941	7.27846	11.0044	15.9769	168.694	237.3	98.0511	251.006	112.31	88.9845
YBL087C	861.676	1088.46	782.502	1036.19	833.192	659.737	753.944	727.952	829.386	778.549	832.911	677.993
YBL086C	34.0429	28.3946	34.3916	27.1288	36.9434	38.014	29.5954	21.4011	17.991	21.4859	25.1129	15.7434
YBL084C	29.5783	18.9297	33.652	29.7755	29.8691	30.852	52.5319	128.721	39.5803	116.024	96.9637	69.8186
YBL080C	35.1591	11.3578	41.7877	24.4821	25.939	34.433	32.9249	40.9138	30.135	40.9496	37.6694	36.6205
YBL078C	63.0631	51.1103	80.6169	75.4313	75.4589	82.0883	20.3469	41.5433	16.6417	36.1469	18.8347	17.7969
YBL076C	829.308	711.759	845.368	820.481	885.856	955.585	1262.99	1169.82	1285.01	1316.96	1141.59	1163.64
YBL075C	10.6035	17.0368	37.35	22.4971	25.153	33.0557	71.399	79.6246	59.3704	86.9548	39.4133	46.2035
YBL074C	12.8359	5.67892	19.5995	17.8653	23.5809	24.7918	32.555	33.3605	20.2399	39.9385	12.2077	10.2674
YBL072C	1668.66	2084.17	1513.97	1770.65	1659.31	1550.04	2033.58	1892.11	2223.69	1814.93	2255.98	2325.23
YBL071C	0	0	0.369802	0	0	0	0.739886	0.314722	0.449776	0.252776	0	0
YBL070C	0	0	0	0.661678	0	0	0.369943	0.629444	0	0.252776	0.34879	0.342248
YBL067C	44.6464	43.5384	28.105	22.4971	30.6552	30.852	66.2198	79.6246	56.2219	71.0299	83.0121	103.359
YBL066C	18.4167	28.3946	35.501	26.4671	28.2971	29.4747	96.5551	122.427	84.5578	98.5825	77.0827	79.7438
YBL064C	204.257	147.652	241.111	179.315	163.494	197.783	105.804	170.894	133.583	146.357	102.196	144.771
YBL061C	103.803	100.328	96.8882	97.2667	77.817	104.125	82.8672	98.5079	62.9686	109.705	114.403	96.8562
YBL059C-A	67.5277	47.3244	69.153	53.5959	55.0221	63.9077	20.7168	26.4366	18.8906	29.0692	28.9496	37.6473
YBL057C	55.25	35.9665	49.5535	54.2576	59.7383	55.9192	40.6937	44.6905	49.9251	39.433	40.1109	43.4655
YBL055C	56.3661	60.5752	49.5535	52.9342	44.0177	63.9077	43.6533	44.6905	38.2309	52.0718	46.0403	42.781
YBL052C	10.0455	11.3578	9.61486	4.63175	8.64633	10.4676	54.7516	70.8124	28.7856	89.9881	63.8286	48.9415
YBL051C	189.189	168.475	179.724	140.937	216.158	196.13	187.561	188.204	136.282	177.954	159.048	149.22
YBL047C	698.717	577.357	620.528	554.486	656.335	625.854	539.747	545.413	374.213	503.782	549.345	542.805
YBL045C	655.745	471.351	899.729	785.412	606.029	767.443	425.804	604.895	493.404	510.859	435.639	466.142
YBL042C	167.982	159.01	258.862	254.746	270.394	322.018	420.995	351.544	433.134	375.624	197.764	196.793
YBL040C	136.73	94.6487	151.989	120.425	140.699	143.517	89.1563	130.61	103.898	124.366	100.8	93.7759
YBL039C	401.26	395.632	457.445	462.513	498.343	582.056	319.631	297.727	343.179	385.23	354.371	292.964
YBL036C	117.197	96.5417	102.435	99.9134	97.4677	93.1069	51.4221	55.391	54.8726	68.7549	75.6875	78.3748
YBL035C	79.8055	51.1103	96.8882	93.9583	103.756	96.6879	98.7748	68.2946	76.4618	78.6132	59.2944	58.8667
YBL034C	59.7146	56.7892	53.9911	41.024	50.3059	57.2965	73.2487	87.8074	41.8291	100.099	98.7077	81.7973
YBL033C	97.6641	90.8628	118.707	105.868	106.114	111.287	55.4915	59.4824	67.4663	64.9633	49.5282	54.0752
YBL030C	1155.23	1162.29	1269.53	1148.67	951.882	1045.66	633.342	914.896	772.714	777.538	769.431	939.471
YBL029C-A	37.3914	26.5016	62.4966	59.551	55.0221	53.44	25.896	25.8072	16.6417	29.8275	16.7419	19.1659
YBL028C	69.7601	88.9698	112.42	110.5	103.756	134.977	27.7457	26.1219	24.7377	53.3356	31.7399	27.0376
YBL023C	114.407	102.221	119.816	107.192	121.835	142.415	109.133	105.747	116.492	125.629	130.796	109.862
YBL022C	344.336	227.157	372.391	287.83	264.106	344.881	285.596	323.534	241.529	307.122	305.192	324.109
YBL021C	21.2071	7.5719	25.5164	26.4671	21.2228	31.9538	15.5376	19.8275	13.4933	18.7054	8.37097	8.89845
YBL018C	25.6717	26.5016	25.1466	28.4522	30.6552	36.3613	25.1561	36.193	32.3838	32.1025	36.623	39.0163
YBL017C	233.278	166.582	198.584	169.39	187.861	201.089	325.18	398.438	313.494	418.091	329.258	329.927
YBL014C	10.0455	13.2508	12.5733	13.2336	12.5765	13.4977	64.74	65.4621	47.6762	81.8993	69.7581	54.4174
YBL010C	32.3687	54.8963	44.0065	38.3773	47.9478	47.9308	31.0752	35.2488	20.2399	35.8941	17.7883	23.2729
YBL007C	395.679	376.702	407.892	369.216	460.614	452.037	474.267	453.199	404.798	428.96	460.752	445.265
YBL006C	50.7853	58.6822	78.7679	62.1977	77.0309	79.0582	51.792	53.188	52.6237	52.3245	39.4133	45.519
YBL003C	484.972	596.287	657.139	739.094	696.423	577.648	456.88	514.57	452.024	493.923	328.56	316.579
YBL001C	181.934	219.585	183.422	152.186	192.577	157.29	79.5377	91.8988	71.9641	80.6354	103.242	112.257
YBR001C	90.4091	56.7892	105.024	77.4163	68.3846	92.005	105.434	125.259	110.645	137.51	91.3831	109.519
YBR002C	24.5555	39.7525	32.5426	31.7605	40.0875	42.9724	37.7342	33.99	43.6282	43.2246	28.6008	24.2996
YBR004C	33.4848	24.6087	28.4748	23.1587	20.4368	26.72	58.8209	102.285	78.7107	77.3493	42.5524	48.5992
YBR007C	41.298	41.6454	55.1005	48.9642	60.5243	59.5002	67.6996	80.2541	53.9731	65.9744	56.504	45.1767
YBR008C	0.558081	1.89297	1.10941	1.98503	0	2.75464	76.5782	84.6602	69.7152	93.0214	25.1129	25.3264
YBR009C	465.997	497.852	658.618	712.627	612.317	491.153	571.932	636.997	464.168	560.909	390.994	287.488
YBR011C	1282.47	1425.41	840.93	954.801	928.301	848.705	522.729	473.027	595.953	513.893	951.151	939.471
YBR012C	0	0	0	0	0	0	0	0	0	0.252776	0	0
YBR013C	0	0	0	0	0	0	0	0	0	0	0	0
YBR014C	103.803	68.1471	107.612	95.2816	108.472	93.3823	53.2718	53.5027	40.4798	56.6217	52.6673	48.257
YBR015C	234.952	194.976	174.547	129.689	143.843	169.961	190.521	208.031	217.691	195.901	282.869	264.215
YBR017C	149.008	155.224	224.1	197.842	198.08	224.228	250.821	252.722	280.21	274.514	197.764	193.712
YBR018C	1.67424	0	0.369802	0.661678	0	0.275464	2.21966	2.51777	1.34933	3.28608	2.79032	1.36899
YBR019C	1.11616	0	1.10941	0	0	1.10186	4.06937	0.944166	2.24888	1.76943	2.79032	2.05349
YBR023C	239.975	164.689	187.12	138.952	176.857	196.13	332.949	341.788	334.183	328.608	364.486	377.157
YBR025C	870.606	849.946	818.372	771.517	829.262	810.415	561.943	570.905	505.998	564.448	721.298	611.255
YBR026C	243.323	160.903	186.38	168.066	182.359	192.825	105.804	115.503	103.448	119.31	116.147	115.68
YBR028C	42.9722	39.7525	61.0174	41.6857	57.3802	53.1646	69.9192	71.4419	63.4184	79.3715	61.0383	46.5457
YBR029C	183.609	143.866	139.046	131.012	135.983	149.026	158.336	173.726	179.91	197.923	168.815	148.536
YBR034C	152.356	109.793	208.938	168.066	153.276	220.647	133.549	141.31	167.766	146.61	120.681	106.781
YBR035C	271.785	242.301	272.174	245.483	247.599	287.585	170.544	137.533	154.723	147.621	144.05	155.381
YBR036C	240.533	196.869	215.595	183.285	181.573	206.598	204.948	197.96	227.137	214.859	183.813	181.391
YBR037C	98.2222	102.221	94.6694	86.0181	93.5376	82.6392	56.9712	66.0916	66.5668	56.6217	62.4335	67.7651
YBR042C	56.9242	51.1103	25.5164	35.0689	29.8691	31.4029	27.7457	31.4722	31.9341	45.7524	38.7157	45.1767
YBR043C	23.9975	20.8227	89.4921	71.4612	82.5332	111.012	271.908	238.559	250.075	238.873	77.4315	68.7918
YBR044C	34.0429	24.6087	36.2406	30.4372	22.0088	34.9839	39.9538	54.1322	36.8816	57.1273	50.2258	51.6794
YBR045C	12.2778	7.5719	8.13565	7.27846	8.64633	10.4676	10.3584	16.0508	8.99551	14.9138	15.3468	13.0054
YBR046C	86.5025	77.612	66.1946	68.8145	76.2449	67.4887	29.5954	29.8986	30.135	32.608	31.3911	34.2248
YBR049C	156.263	124.936	223.73	190.563	200.438	253.152	115.052	139.107	75.1125	158.49	127.308	103.701
YBR050C	0	1.89297	1.84901	0.661678	2.35809	0.275464	4.06937	4.40611	3.14843	3.53886	0.697581	2.39574
YBR052C	136.73	128.722	201.912	163.434	168.21	169.41	90.2661	103.229	107.496	110.968	79.1754	73.5833
YBR053C	156.263	107.9	151.249	131.012	136.769	160.871	97.295	100.082	99.8502	99.8463	91.0343	92.0647
YBR055C	59.7146	43.5384	66.9342	44.9941	58.9523	70.5188	74.7285	109.523	58.0211	106.924	62.4335	64.6849
YBR057C	54.1338	58.6822	81.7263	75.4313	98.2538	88.9749	44.3932	53.188	36.4318	55.6106	36.623	27.7221
YBR058C	115.523	92.7558	158.645	127.042	146.988	167.758	137.249	149.493	132.684	145.599	95.5685	100.621
YBR058C-A	60.2727	49.2173	46.5951	57.566	61.3103	53.1646	34.7746	25.8072	22.4888	32.608	38.7157	33.8826
YBR059C	159.611	136.294	167.89	127.704	174.499	162.524	258.59	250.833	189.356	248.984	235.433	229.648
YBR060C	39.6237	43.5384	44.0065	44.3324	55.8081	50.1345	69.1793	64.2033	56.6717	70.7772	48.1331	51.6794
YBR061C	87.0606	73.826	117.967	103.222	138.341	126.163	65.11	71.1271	80.0601	80.6354	50.2258	42.781
YBR062C	57.4823	56.7892	49.9233	44.3324	80.9611	67.2132	26.6359	25.1777	17.991	27.2998	29.996	25.6686
YBR063C	0.558081	0	0.739604	0	0	0.275464	52.162	67.0358	27.8861	68.7549	36.623	36.9628
YBR065C	35.1591	24.6087	89.4921	54.2576	67.5986	78.2318	64.3701	72.0713	44.5278	76.591	31.3911	30.4601
YBR066C	41.298	22.7157	19.9693	23.8204	22.0088	26.1691	16.2775	21.0864	17.0915	24.2665	13.9516	18.8236
YBR067C	416.886	499.745	330.973	397.007	498.343	423.113	297.804	190.092	247.826	196.154	291.938	224.857
YBR068C	288.528	238.515	704.103	606.759	598.955	615.938	807.956	816.388	856.822	840.731	354.371	344.301
YBR069C	186.957	160.903	281.05	216.369	241.311	296.95	351.076	392.458	436.732	400.396	229.504	245.05
YBR070C	40.1818	20.8227	25.8862	23.1587	23.5809	24.5163	29.5954	26.4366	26.087	32.608	28.252	24.9841
YBR072C-A	0	0	0	0	0	0	0.369943	0	0.449776	0	0.34879	0.684496
YBR076C-A	5.58081	3.78595	8.13565	2.64671	11.0044	6.33567	11.4682	16.0508	10.7946	13.3971	5.23185	8.5562
YBR077C	70.3182	73.826	96.1486	80.063	80.9611	93.9333	50.3123	56.3352	54.8726	62.1828	30.6935	33.5403
YBR079C	666.348	641.719	795.445	758.283	790.746	880.383	712.14	707.495	628.786	745.182	688.512	662.934
YBR080C	292.434	215.799	271.065	223.647	252.316	290.89	183.492	188.518	169.116	190.846	199.159	187.552
YBR081C	62.505	39.7525	78.7679	68.1528	70.7427	96.4124	95.4453	148.549	56.2219	156.215	102.196	97.1984
YBR082C	565.894	751.511	592.793	671.603	775.026	570.762	367.353	354.377	351.725	352.369	373.903	341.221
YBR084C-A	1122.86	1328.87	1069.1	1299.54	1071.36	994.15	990.707	980.359	987.707	1032.84	1219.02	1091.77
YBR085C-A	367.217	335.057	381.266	353.998	347.425	350.39	122.081	140.681	152.474	153.94	124.518	169.413
YBR086C	282.389	230.943	274.393	230.926	275.111	261.415	443.562	482.469	438.531	481.285	448.893	432.944
YBR088C	193.654	185.512	287.336	309.665	275.897	310.173	171.284	194.498	172.714	222.695	145.446	122.525
YBR089C-A	131.707	109.793	122.774	114.47	113.188	117.348	55.1215	50.6702	46.7767	57.6328	55.4577	49.9682
YBR091C	40.1818	30.2876	51.4025	33.0839	47.1618	34.433	26.6359	28.0102	26.087	25.7831	19.881	19.8504
YBR092C	572.033	528.14	459.664	442.663	542.361	566.079	607.816	442.499	581.11	518.695	590.851	544.174
YBR093C	164.634	193.083	117.227	107.192	143.843	120.929	169.064	135.96	161.469	159.754	211.018	181.734
YBR095C	45.7626	30.2876	80.9867	59.551	63.6684	86.2203	50.3123	51.9291	43.6282	56.6217	31.0423	28.0643
YBR099C	0	0	0	0	0	0	2.95954	2.20305	0	2.27498	1.39516	1.71124
YBR101C	149.008	106.007	202.282	205.12	226.377	209.353	104.694	108.264	108.396	125.882	76.0363	72.8988
YBR102C	71.4343	70.0401	84.3149	67.4912	85.6773	93.3823	95.8152	98.5079	73.7632	104.396	73.9435	70.8453
YBR103C-A	0	0	0	0	0	0	0	0	0	0.252776	0	0
YBR105C	31.2525	24.6087	42.5273	26.4671	42.4456	55.3683	52.162	41.858	52.6237	41.9607	22.6714	27.3798
YBR107C	3.90656	1.89297	5.91684	1.32336	3.93015	7.43753	12.5781	16.0508	12.1439	12.6388	5.23185	4.79147
YBR109C	404.05	450.528	404.933	383.773	418.954	389.506	212.717	229.432	215.892	219.156	259.849	256.686
YBR111C	207.606	202.548	226.319	206.444	207.512	235.522	130.96	143.198	126.387	146.357	135.679	143.744
YBR112C	405.725	603.859	376.828	311.65	586.378	360.583	420.995	415.433	289.655	389.78	450.288	382.975
YBR115C	396.237	369.13	544.349	506.845	592.667	582.331	523.839	511.423	528.037	561.414	459.357	424.73
YBR120C	71.9924	73.826	71.7416	71.4612	58.9523	78.5073	33.2949	32.1016	25.1874	41.4552	26.5081	35.2515
YBR121C	709.32	662.541	695.598	704.025	650.047	770.749	720.649	713.16	788.007	833.907	788.964	688.603
YBR122C	122.22	96.5417	122.774	111.162	117.118	129.193	55.4915	77.1069	68.8157	73.5577	74.2923	72.2143
YBR123C	58.0404	43.5384	81.3565	64.1828	83.3192	68.866	55.8614	59.4824	44.5278	66.7327	53.7137	52.3639
YBR125C	41.856	28.3946	36.6104	26.4671	31.4412	44.6252	40.6937	49.0966	52.174	43.9829	59.9919	53.3907
YBR126C	656.303	541.391	692.64	668.295	708.213	621.172	379.562	382.072	357.122	374.613	324.375	382.291
YBR127C	907.997	866.983	710.39	713.951	730.222	785.348	707.331	596.083	686.358	615.003	885.927	853.909
YBR128C	7.81313	1.89297	7.39604	3.30839	3.14412	4.40743	5.54915	6.29444	1.7991	6.06661	5.23185	6.84496
YBR129C	36.2752	20.8227	58.7986	39.039	67.5986	64.4586	53.2718	50.0408	44.078	64.4578	32.7863	28.4066
YBR130C	71.9924	68.1471	117.227	78.7397	110.044	114.042	75.0984	75.2185	60.7197	88.7242	60.3407	52.3639
YBR132C	63.0631	43.5384	59.5382	41.024	61.3103	49.5835	65.8499	74.9038	63.8681	66.2272	49.877	80.4283
YBR133C	62.505	45.4314	41.4179	28.4522	51.092	39.1159	155.376	140.051	130.885	133.213	128.006	139.637
YBR138C	71.4343	66.2541	77.6585	68.1528	77.817	91.1786	50.3123	61.3708	35.5323	67.4911	43.25	44.15
YBR140C	74.7828	47.3244	106.133	74.7696	80.9611	99.718	424.695	444.387	311.245	461.821	349.488	366.548
YBR141C	18.4167	15.1438	28.4748	30.4372	24.3669	34.7085	19.9769	21.0864	19.7901	19.7165	13.254	13.6899
YBR143C	421.351	389.953	515.135	497.582	473.19	496.937	374.012	382.387	334.633	451.71	352.278	306.996
YBR144C	0	1.89297	0	0	0	0	0.369943	0	0.449776	0	0	0
YBR150C	42.9722	39.7525	29.5842	31.7605	43.2317	42.146	75.4684	107.635	31.9341	103.132	79.873	71.5298
YBR154C	200.351	168.475	207.829	232.911	231.093	259.212	113.942	112.985	92.6538	136.246	104.288	85.2197
YBR156C	41.856	34.0735	37.35	36.3923	38.5155	41.0442	45.503	41.5433	25.6372	47.5218	34.1815	31.1446
YBR157C	7.81313	3.78595	2.95842	2.64671	3.14412	2.75464	12.948	9.44166	6.29686	9.09992	8.71976	11.9787
YBR162C	644.583	524.354	538.432	496.259	523.496	579.301	648.14	670.043	689.056	619.806	701.069	680.047
YBR164C	117.197	94.6487	133.868	132.336	95.8957	146.547	61.0406	76.4774	66.5668	86.9548	59.2944	70.5031
YBR166C	137.846	109.793	161.604	136.306	127.337	162.524	96.9251	112.67	103.448	132.202	93.127	97.5407
YBR167C	15.0682	15.1438	25.8862	31.0989	25.939	35.8103	17.7573	11.9594	16.1919	20.222	13.254	7.18721
YBR169C	196.444	126.829	216.704	174.021	159.564	212.658	141.688	175.3	159.221	156.721	107.079	148.878
YBR170C	92.6414	90.8628	139.785	109.839	113.188	119.827	81.3875	80.5688	78.261	88.4714	65.9214	60.9201
YBR172C	127.8	119.257	112.05	102.56	110.83	136.355	158.706	166.803	102.099	178.712	112.659	93.7759
YBR173C	150.682	172.261	194.516	193.872	178.429	196.957	84.717	78.051	95.8022	77.6021	72.8972	88.6422
YBR174C	0	0	0	0	0	0	0	0.314722	0	0.252776	0	0
YBR177C	375.03	340.735	357.599	338.117	323.844	344.606	210.868	219.046	233.883	240.642	250.083	285.435
YBR179C	83.7121	47.3244	111.68	82.0481	80.9611	112.94	75.0984	98.8227	79.1605	106.419	89.2903	83.8508
YBR181C	1821.57	2292.39	1707.38	2136.56	1873.11	1670.41	1902.62	1756.78	1975.41	1953.95	2128.32	2012.42
YBR182C	29.5783	26.5016	49.1837	21.1737	23.5809	34.9839	34.0348	48.7819	42.2789	31.8497	20.2298	22.9306
YBR182C-A	0	1.89297	0	0	0	0.275464	0.369943	0.629444	1.7991	0.252776	0.697581	0.342248
YBR185C	95.9899	77.612	101.326	83.3714	74.6729	84.5675	47.3527	65.1474	53.9731	57.8856	63.131	57.4977
YBR188C	32.3687	32.1806	55.4703	53.5959	63.6684	59.5002	28.4856	21.7158	26.5368	33.3664	17.7883	13.6899
YBR193C	53.5757	30.2876	60.2778	58.2277	47.9478	69.9679	35.8845	33.0458	31.0345	39.9385	19.881	27.7221
YBR195C	44.0884	20.8227	30.3238	23.8204	27.5111	34.7085	29.9654	29.8986	32.3838	34.1247	32.0887	27.0376
YBR196C	2620.19	2635.02	2282.42	2609.66	2341.58	2346.4	2418.32	2194.87	2688.76	2223.41	2488.62	2596.64
YBR197C	19.5328	13.2508	38.8292	35.0689	39.3015	41.3196	33.2949	37.4519	31.9341	32.608	19.1835	20.1926
YBR198C	113.848	104.114	134.978	96.605	138.341	130.019	150.937	130.61	108.846	140.038	114.752	93.7759
YBR201C-A	8.92929	5.67892	5.17723	5.29342	7.07427	4.68289	2.95954	2.20305	2.24888	2.78053	3.13911	4.44922
YBR204C	48.553	26.5016	49.5535	33.0839	45.5897	54.8174	45.8729	47.523	35.982	37.158	36.9718	36.9628
YBR208C	52.4596	45.4314	76.5491	50.9492	69.1706	70.7943	187.561	208.975	155.173	192.362	154.165	144.086
YBR211C	16.1843	9.46487	19.2297	23.8204	22.7949	27.8219	25.5261	22.66	21.5892	29.8275	12.5565	15.4012
YBR216C	24.5555	15.1438	41.7877	23.8204	37.7294	45.4516	68.0695	80.2541	62.5188	89.2298	46.7379	44.8345
YBR218C	479.949	348.307	418.246	351.351	363.932	424.215	672.556	636.368	686.807	631.939	750.946	846.379
YBR221C	527.944	439.17	438.955	439.354	418.954	452.312	388.07	374.519	403.449	402.419	409.131	425.072
YBR222C	277.366	212.013	176.026	131.674	159.564	169.686	132.81	155.787	143.478	133.971	170.21	201.584
YBR223C	21.2071	5.67892	22.9277	15.2186	21.2228	22.5881	44.3932	59.7971	42.2789	38.9274	23.369	35.5938
YBR229C	171.331	159.01	97.6278	80.063	102.184	100.82	147.237	167.117	129.535	175.426	214.506	195.081
YBR230C	183.609	130.615	169.739	166.081	129.695	165.278	81.3875	87.1779	85.0076	89.7353	91.7319	126.29
YBR231C	24.5555	32.1806	41.7877	30.4372	40.0875	38.8404	12.948	19.5128	14.3928	19.2109	15.6956	15.4012
YBR234C	267.879	234.729	323.577	291.138	306.552	335.24	180.162	180.336	210.945	212.079	201.95	224.857
YBR236C	83.7121	58.6822	105.024	87.3415	113.188	114.318	77.688	80.8835	76.4618	95.8019	57.5504	77.0058
YBR238C	41.856	49.2173	65.8248	54.9193	64.4545	83.4656	95.0754	85.2896	89.9551	97.0658	73.246	65.7116
YBR239C	24.5555	22.7157	37.7198	37.054	37.7294	43.2479	52.5319	46.5788	40.4798	42.4663	36.2742	35.936
YBR240C	6.13889	3.78595	5.54703	3.97007	5.50221	5.78475	8.50869	10.7005	12.1439	11.1221	8.37097	8.21395
YBR241C	53.0177	18.9297	57.6892	35.0689	32.2272	45.4516	45.133	51.9291	53.5233	43.2246	38.7157	40.043
YBR243C	59.7146	41.6454	46.2253	33.0839	34.5853	42.6969	51.4221	56.0205	55.7722	58.1384	69.7581	68.7918
YBR245C	184.167	149.545	220.032	188.578	235.023	255.906	176.833	165.544	155.173	194.132	153.468	148.878
YBR247C	117.755	100.328	168.26	172.698	170.569	204.945	128.74	120.538	103.898	134.982	105.335	82.1395
YBR248C	212.071	225.264	214.115	170.713	213.8	219.82	138.359	127.148	144.378	148.885	126.96	123.209
YBR249C	915.252	1010.85	822.07	876.062	857.559	859.448	566.383	478.377	622.04	509.09	692.349	620.496
YBR254C	32.3687	26.5016	33.652	36.3923	40.8736	44.6252	22.9365	25.1777	24.2879	28.5636	17.7883	22.9306
YBR255C-A	17.8586	15.1438	28.8446	19.1887	18.8647	20.6598	11.0983	12.9036	12.1439	17.1887	11.1613	13.0054
YBR256C	176.912	170.368	148.661	160.126	135.197	161.697	118.012	137.848	102.549	155.204	159.397	153.327
YBR258C	16.7424	20.8227	31.4332	15.2186	21.2228	28.9237	8.50869	10.7005	7.19641	18.7054	8.37097	6.84496
YBR260C	66.4116	90.8628	110.201	82.0481	102.184	104.125	85.8268	82.1424	77.3614	80.6354	79.873	74.9523
YBR261C	98.2222	88.9698	105.024	100.575	104.542	121.755	54.7516	54.4469	65.6672	55.1051	57.8992	58.5244
YBR262C	37.3914	39.7525	92.8204	83.3714	62.0964	78.5073	28.1157	46.2641	45.4273	54.8523	33.8327	22.5884
YBR264C	30.1364	32.1806	34.3916	31.7605	31.4412	30.5765	24.4162	21.4011	17.5412	25.5303	15.3468	17.4546
YBR269C	112.174	79.5049	127.212	123.072	102.97	106.88	47.3527	46.8936	58.0211	56.1162	40.8085	54.7597
YBR270C	1.67424	7.5719	5.91684	3.30839	4.71618	5.23382	28.1157	36.5077	17.991	30.5858	12.5565	12.3209
YBR272C	74.7828	45.4314	81.7263	51.6109	52.664	79.8846	68.0695	64.8327	68.3659	77.0965	54.7601	58.8667
YBR273C	121.103	111.686	112.42	95.2816	98.2538	110.737	52.9019	60.4266	44.078	54.5995	65.2238	69.8186
YBR275C	60.2727	56.7892	71.3718	61.5361	62.8824	69.9679	114.312	138.478	82.7587	158.49	129.75	103.701
YBR276C	24.5555	17.0368	19.5995	13.2336	19.6508	19.2825	117.642	125.574	77.8112	126.641	128.355	138.953
YBR277C	0	0	0	0	0	0	1.10983	0.314722	0.449776	1.26388	0	0
YBR280C	43.5303	20.8227	46.5951	25.8054	33.0133	44.6252	40.3238	37.1372	40.9296	41.4552	32.7863	36.6205
YBR281C	63.6212	34.0735	79.5075	69.4762	67.5986	77.4054	87.3066	87.8074	76.4618	106.924	93.8246	83.8508
YBR283C	339.313	314.234	311.743	273.935	268.036	299.154	298.914	288.285	324.738	327.344	315.306	311.446
YBR288C	81.4798	64.3611	119.076	98.59	92.7515	112.114	85.8268	94.7313	83.2085	110.968	83.0121	67.7651
YBR291C	35.1591	22.7157	32.1728	29.7755	38.5155	31.9538	57.7111	62.9444	54.4228	65.9744	26.5081	22.9306
YBR292C	0	0	0	0	0.78603	0	1.47977	1.25889	3.14843	4.04441	1.04637	3.08023
YBR296C	3.90656	1.89297	1.47921	1.98503	1.57206	1.92825	4.43932	4.72083	4.04798	4.80274	4.53427	4.79147
YBR298C	0	0	1.47921	0	0.78603	1.10186	60.3007	89.381	49.0255	81.8993	14.998	19.1659
YBL102W	80.3636	83.2909	80.2471	64.1828	71.5287	79.0582	84.347	96.3049	81.4094	80.6354	78.4778	74.6101
YBL100W-C	1.11616	0	0	0	0	0	0	0	0	0.505551	0	0
YBL099W	1368.41	1050.6	1532.83	1359.09	1150.75	1242.07	846.43	1095.86	948.577	933.753	923.946	1079.45
YBL098W	129.475	96.5417	44.0065	25.1438	35.3714	45.1761	34.0348	44.6905	31.4843	34.883	121.379	120.814
YBL097W	27.3459	20.8227	34.7614	22.4971	25.939	30.5765	28.4856	37.4519	13.4933	45.2468	35.2278	24.6419
YBL095W	23.9975	20.8227	28.4748	14.5569	11.7905	12.6713	24.4162	26.1219	17.991	31.8497	31.3911	30.4601
YBL092W	1217.73	1563.6	1018.81	1353.13	1186.91	890.851	1159.77	1087.05	1170.77	1057.36	1441.55	1365.91
YBL090W	71.9924	60.5752	101.326	89.3265	73.1008	109.635	45.503	50.0408	41.3794	53.0829	36.623	48.5992
YBL089W	20.649	17.0368	29.5842	25.8054	22.7949	33.3312	48.0926	51.9291	56.2219	54.3467	31.3911	30.4601
YBL085W	101.571	87.0768	79.5075	71.4612	95.8957	90.0768	127.26	121.797	71.5143	141.554	111.264	94.1182
YBL081W	86.5025	119.257	73.5906	57.566	151.704	77.6809	98.4048	81.8277	67.9161	88.4714	88.9415	64.3426
YBL079W	100.455	94.6487	122.774	109.839	111.616	127.54	324.07	333.92	268.516	349.589	296.123	284.066
YBL071W-A	36.2752	26.5016	56.5797	56.9043	66.8126	71.0697	27.3758	30.8427	29.6852	35.8941	14.998	13.6899
YBL068W	88.7348	83.2909	118.337	129.689	114.76	121.48	81.0175	90.6399	94.4529	96.3075	76.0363	70.5031
YBL063W	22.3232	9.46487	15.5317	13.8952	14.9346	22.5881	25.1561	40.2844	19.3404	54.8523	47.0867	32.1713
YBL060W	22.3232	18.9297	32.1728	25.1438	27.5111	30.3011	52.162	81.513	31.9341	77.8549	32.4375	28.7488
YBL059W	30.6944	26.5016	38.4594	37.7156	34.5853	36.9122	13.6879	24.863	18.8906	23.7609	13.9516	12.3209
YBL058W	265.088	247.98	326.905	314.959	341.923	341.025	201.249	185.686	190.705	220.673	148.585	173.52
YBL056W	141.752	104.114	193.407	171.375	156.42	179.052	186.821	201.422	152.024	220.673	166.024	158.461
YBL054W	61.9469	49.2173	65.8248	61.5361	84.1052	110.737	72.8788	81.1982	74.6627	57.6328	50.9234	49.9682
YBL050W	188.631	143.866	202.282	182.623	179.215	196.957	96.1852	103.229	110.645	110.968	84.756	73.2411
YBL048W	0	0	0	0	0	0	3.69943	3.14722	2.24888	5.30829	2.44153	4.44922
YBL046W	55.8081	47.3244	56.5797	43.0091	62.0964	66.3869	34.0348	33.3605	28.3359	37.9163	29.2984	25.3264
YBL043W	13.952	3.78595	25.8862	11.2485	7.8603	13.4977	17.3873	51.6144	35.982	31.3442	4.18548	12.3209
YBL041W	235.51	206.334	296.951	297.093	278.255	317.335	129.85	159.249	153.373	170.118	136.028	126.632
YBL039W-B	5.58081	1.89297	7.39604	3.30839	7.8603	5.78475	5.54915	6.29444	5.84708	5.30829	1.39516	3.08023
YBL038W	149.008	138.187	174.916	147.554	161.136	157.565	71.399	72.386	62.5188	87.7131	51.9698	61.6046
YBL037W	96.5479	54.8963	125.733	78.078	124.979	112.94	127.63	158.62	128.186	160.765	114.752	128.343
YBL032W	132.265	111.686	132.759	100.575	147.774	134.977	107.653	105.432	99.8502	100.605	109.171	120.129
YBL031W	14.5101	13.2508	21.8183	15.8803	18.8647	20.9353	22.5665	16.6803	11.6942	19.4637	17.7883	14.7167
YBL029W	24.5555	32.1806	23.2975	13.8952	20.4368	13.4977	17.7573	19.198	7.64618	20.7276	19.881	19.5081
YBL027W	1182.01	1567.38	1282.84	1290.93	1231.71	1142.35	1185.67	1149.36	1226.54	1047.25	1252.85	1150.98
YBL026W	69.7601	58.6822	73.5906	77.4163	70.7427	85.6693	27.7457	39.3402	31.0345	38.1691	41.1573	42.0965
YBL025W	21.7651	11.3578	29.5842	25.1438	29.8691	38.014	14.4278	14.7919	15.2924	18.4526	5.58065	9.92519
YBL024W	302.48	229.05	350.203	328.854	362.36	382.344	241.943	246.112	285.607	252.27	211.018	190.974
YBL020W	46.8788	26.5016	31.0634	17.2036	18.0787	28.9237	51.0521	52.2438	58.4708	51.819	61.3871	72.8988
YBL019W	16.1843	9.46487	14.0525	11.2485	16.5066	14.5996	34.4047	35.2488	21.1395	43.4774	21.2762	22.5884
YBL016W	68.6439	71.933	107.612	106.53	102.184	121.755	82.1273	83.716	85.0076	72.7994	60.3407	54.4174
YBL015W	135.055	88.9698	115.008	84.6948	75.4589	89.5258	54.3816	86.8632	65.6672	61.93	82.6633	80.4283
YBL011W	80.3636	45.4314	87.6431	60.8744	62.0964	80.1601	152.417	157.99	134.483	155.457	136.028	150.931
YBL009W	63.0631	71.933	62.4966	63.5211	77.0309	67.2132	70.6591	69.8682	63.8681	77.3493	60.3407	69.8186
YBL008W	37.3914	24.6087	30.3238	23.1587	36.9434	44.0743	49.5724	53.5027	44.9776	61.4245	56.8528	56.4709
YBL005W	22.3232	20.8227	14.7921	12.5719	16.5066	16.2524	50.3123	72.386	39.1305	65.9744	45.6915	40.043
YBL004W	149.008	157.117	210.417	172.698	180.001	238.552	436.163	440.611	308.546	541.445	477.145	381.606
YBL002W	400.702	372.916	520.312	526.034	569.872	499.692	343.307	372.945	354.873	357.172	257.058	215.274
YBR003W	95.9899	60.5752	107.243	74.1079	69.9567	95.3106	85.8268	107.95	78.7107	107.43	92.0806	108.15
YBR005W	32.9268	30.2876	54.7307	43.6708	34.5853	40.7687	38.1041	45.3199	44.5278	42.7191	24.7641	29.0911
YBR006W	54.6919	24.6087	45.1159	39.039	33.0133	38.8404	30.3353	35.8783	41.3794	41.9607	25.1129	31.1446
YBR010W	615.563	778.013	937.449	1150.66	980.965	872.946	819.054	967.14	896.403	946.644	592.595	600.987
YBR016W	156.263	168.475	170.109	190.563	249.958	189.795	48.0926	48.7819	53.9731	51.5662	42.9012	43.1232
YBR020W	0	0	0	1.32336	0	0.275464	16.2775	20.7716	12.1439	15.4193	6.97581	4.44922
YBR021W	81.4798	58.6822	122.035	87.3415	100.612	113.767	136.879	150.437	152.924	140.543	86.5	99.5942
YBR022W	44.6464	24.6087	46.9649	40.3624	45.5897	55.9192	25.896	22.9747	26.5368	24.0137	19.1835	21.5616
YBR024W	60.2727	37.8595	54.7307	36.3923	46.3758	50.9609	29.5954	28.325	24.2879	30.8386	31.0423	33.5403
YBR030W	12.2778	11.3578	17.0109	15.2186	14.9346	21.2107	79.5377	79.6246	61.6193	92.7686	38.0181	36.2783
YBR031W	2631.35	3257.81	2450.31	3177.38	2616.69	2354.39	2815.64	2570.65	3001.8	2386.45	2658.13	2663.72
YBR033W	9.48737	3.78595	32.1728	17.8653	8.64633	15.1505	24.0463	41.858	19.3404	33.6191	9.76613	10.9519
YBR038W	279.598	204.441	201.912	174.021	213.8	210.179	206.058	212.123	234.783	207.023	255.663	297.756
YBR039W	495.576	512.996	594.642	529.342	466.116	504.65	214.567	363.504	278.411	337.203	246.595	280.301
YBR041W	111.616	81.3979	87.2733	55.581	68.3846	90.0768	106.544	119.594	102.549	127.146	129.052	128.001
YBR047W	6.13889	5.67892	3.32822	1.98503	0.78603	4.40743	3.32949	5.66499	4.49776	3.79163	3.13911	4.10698
YBR048W	1129	1406.48	945.954	1211.53	1099.66	982.03	1201.2	988.856	1206.75	995.683	1206.12	1176.65
YBR051W	0	0	0	0	0	0	0.739886	0.314722	0.449776	0	0	1.02674
YBR054W	510.086	389.953	400.496	283.86	253.888	293.094	266.729	372.001	273.014	326.839	405.992	437.393
YBR056W	169.656	162.796	221.142	154.833	158.778	187.316	109.503	157.99	111.095	123.354	105.335	107.124
YBR056W-A	31.8106	35.9665	100.956	48.9642	77.0309	76.8545	17.3873	30.2133	24.2879	20.9804	7.67339	8.89845
YBR071W	166.866	147.652	249.986	198.503	209.87	230.288	132.44	153.899	136.282	138.521	75.6875	96.5139
YBR072W	108.826	51.1103	221.512	129.689	123.407	133.6	51.4221	91.2693	56.2219	60.6661	25.8105	38.674
YBR073W	190.305	136.294	234.085	189.902	215.372	255.906	248.972	276.955	184.408	287.406	219.04	218.354
YBR074W	93.7575	81.3979	89.1223	89.9882	84.8912	82.6392	167.584	185.371	148.876	193.373	175.442	155.038
YBR076W	4.46464	0	0.739604	0	0.78603	0.275464	1.84972	1.25889	0.449776	1.76943	3.13911	1.71124
YBR078W	1864.55	1743.43	1476.99	1465.62	1469.88	1327.46	1529.71	1682.19	1635.38	1555.83	1711.51	1670.85
YBR083W	87.0606	87.0768	72.1114	97.2667	141.485	106.605	122.451	99.1374	92.6538	116.53	87.8952	88.6422
YBR084W	355.497	340.735	312.853	328.854	347.425	378.488	368.833	331.087	343.179	386.999	433.895	393.927
YBR085W	4.46464	11.3578	2.21881	1.98503	4.71618	3.8565	2.5896	2.20305	4.49776	3.79163	5.92944	5.47597
YBR087W	84.8282	79.5049	91.3412	88.0032	72.3148	109.635	75.0984	71.1271	59.8202	83.6687	65.2238	79.7438
YBR094W	106.593	62.4682	83.2055	55.581	72.3148	93.3823	71.7689	91.2693	60.2699	88.4714	90.3367	102.332
YBR096W	145.101	90.8628	109.092	83.3714	113.188	107.156	92.8557	99.1374	107.047	95.0436	101.498	116.022
YBR097W	31.8106	24.6087	38.0896	27.7905	34.5853	40.2178	81.7574	80.2541	53.5233	97.0658	78.4778	76.6635
YBR098W	20.0909	15.1438	22.1881	11.9102	15.7206	20.3843	27.7457	34.9341	8.99551	45.2468	28.9496	14.3744
YBR103W	36.2752	32.1806	54.7307	51.6109	52.664	53.991	51.792	61.056	53.0735	69.2605	40.1109	35.936
YBR104W	47.4368	45.4314	41.4179	42.3474	44.0177	58.6739	32.555	29.8986	38.2309	39.6858	39.7621	36.2783
YBR106W	460.416	471.351	262.19	234.896	237.381	290.89	175.353	194.183	205.547	201.209	349.488	364.494
YBR108W	112.174	119.257	95.0392	80.063	135.983	88.424	132.07	124.315	92.6538	94.5381	106.73	123.552
YBR110W	62.505	53.0033	51.4025	48.3025	56.5942	54.5419	63.2603	67.3505	72.4139	70.0188	63.4798	77.6903
YBR111W-A	51.9015	43.5384	56.9495	64.8444	53.45	63.6322	18.4972	19.198	17.5412	26.7942	17.0907	20.5349
YBR114W	25.6717	34.0735	38.8292	41.024	40.0875	41.0442	67.3296	72.386	54.8726	74.0632	40.8085	44.8345
YBR118W	9157.54	13707	7893.8	10752.3	9323.1	7354.07	12346.8	11521.3	14212.9	10437.4	14256.8	14296.7
YBR119W	43.5303	43.5384	42.1575	28.4522	47.1618	44.9006	24.0463	23.6041	22.9386	26.5414	30.3448	18.8236
YBR131W	12.2778	7.5719	18.1203	25.1438	16.5066	24.7918	29.9654	36.5077	40.4798	39.433	21.9738	17.1124
YBR135W	105.477	117.364	88.3827	78.7397	94.3236	100.544	68.0695	58.2235	58.0211	60.9189	60.3407	58.5244
YBR136W	25.1136	26.5016	41.7877	33.0839	30.6552	39.1159	95.0754	115.503	77.3614	123.607	107.427	114.311
YBR137W	92.0833	87.0768	69.153	61.5361	62.0964	76.579	35.5145	36.193	33.7332	31.8497	41.8548	48.5992
YBR139W	240.533	155.224	275.503	262.025	298.691	234.42	220.856	253.981	213.643	253.534	168.117	193.712
YBR141W-A	0	0	1.47921	1.98503	0	0.275464	0	1.25889	1.34933	1.51665	0.34879	0.342248
YBR142W	108.268	73.826	134.978	126.381	139.127	168.584	118.382	123.056	76.4618	152.424	118.938	88.3
YBR145W	34.0429	35.9665	28.4748	31.7605	39.3015	53.7155	38.4741	34.3047	43.1785	33.3664	37.3206	30.8023
YBR146W	209.28	162.796	143.853	126.381	100.612	136.355	79.5377	110.467	77.3614	110.463	114.752	124.236
YBR147W	11.7197	13.2508	7.39604	5.29342	4.71618	8.53939	10.3584	11.6447	9.44529	12.386	17.7883	14.3744
YBR148W	8.92929	1.89297	2.58862	2.64671	1.57206	3.03011	8.50869	5.35027	3.5982	9.09992	14.3004	9.58294
YBR149W	439.209	325.592	500.342	513.462	440.177	504.375	297.434	315.666	289.206	348.325	243.107	287.831
YBR151W	121.103	98.4347	82.8357	55.581	79.389	85.1184	88.0464	93.7871	66.5668	89.4825	101.498	94.1182
YBR152W	15.6263	7.5719	26.6258	22.4971	29.0831	23.139	9.98846	16.6803	7.19641	17.4415	11.8589	6.50271
YBR153W	22.8813	30.2876	51.4025	43.6708	40.8736	48.7571	30.3353	33.99	25.1874	41.4552	18.8347	15.0589
YBR155W	67.5277	60.5752	79.5075	74.7696	88.8214	98.3407	36.2544	41.2286	32.3838	41.4552	34.5302	35.5938
YBR158W	108.826	77.612	119.076	119.102	137.555	167.758	238.613	230.691	238.831	264.15	134.982	128.001
YBR159W	193.096	151.438	164.562	144.907	148.56	173.267	150.197	160.508	146.177	150.149	150.677	181.391
YBR160W	165.192	134.401	183.792	142.261	161.136	170.788	95.0754	92.5282	90.8547	94.2853	80.9194	83.8508
YBR161W	41.298	32.1806	41.048	35.7306	39.3015	42.4215	47.7226	42.8022	40.03	55.1051	33.1351	42.781
YBR162W-A	127.242	157.117	119.816	107.192	121.049	110.737	28.1157	27.0661	23.3883	38.9274	42.5524	38.674
YBR163W	10.0455	3.78595	8.50545	5.29342	6.28824	6.33567	49.9423	59.1677	36.4318	59.4023	38.3669	39.0163
YBR165W	36.8333	18.9297	46.2253	37.054	58.9523	51.5118	29.2255	35.2488	30.135	37.9163	28.252	19.1659
YBR168W	10.6035	7.5719	17.0109	12.5719	13.3625	11.5695	25.896	34.9341	20.2399	28.5636	17.4395	19.5081
YBR171W	123.894	113.578	111.31	99.2517	127.337	117.348	49.2024	55.7058	53.9731	53.0829	48.8306	53.7329
YBR175W	17.3005	5.67892	22.1881	19.1887	20.4368	28.0973	38.1041	44.6905	45.8771	42.7191	16.0444	14.7167
YBR176W	42.9722	37.8595	32.5426	21.1737	28.2971	30.852	21.4567	18.5686	26.9865	27.047	28.9496	26.6953
YBR178W	0	0	0	0	0	0	1.10983	0.629444	0.899551	2.78053	1.39516	2.73798
YBR183W	65.2954	30.2876	96.5184	73.4463	77.817	95.3106	98.0349	100.711	87.2565	98.0769	50.5746	65.7116
YBR184W	7.81313	3.78595	7.39604	8.60181	14.9346	9.91671	10.7283	21.4011	8.99551	17.6943	5.58065	9.92519
YBR186W	2.7904	3.78595	0.739604	0	0	0.550928	1.10983	0.629444	0	1.0111	2.79032	2.73798
YBR187W	83.7121	60.5752	68.7832	67.4912	68.3846	59.5002	85.0869	69.2388	90.8547	85.1854	100.103	83.5085
YBR189W	1217.17	1686.64	1261.77	1368.35	1238.78	1259.15	1147.19	1147.79	1265.22	1076.32	1201.23	1193.76
YBR192W	91.5252	62.4682	78.0283	41.024	56.5942	64.4586	42.1735	42.1727	32.3838	49.0385	54.4113	58.8667
YBR194W	20.0909	20.8227	25.5164	18.527	22.7949	33.8821	15.9075	13.8478	20.2399	20.9804	13.6028	14.0322
YBR199W	129.475	104.114	169.739	113.147	155.634	163.075	160.555	164.285	168.666	181.746	123.821	122.183
YBR200W	61.3889	77.612	76.9189	72.1229	77.0309	80.9864	76.9481	94.7313	53.0735	93.2742	66.2702	58.5244
YBR201W	15.6263	20.8227	13.6827	14.5569	12.5765	19.2825	16.2775	20.4569	13.0435	19.9693	20.2298	22.5884
YBR202W	150.682	124.936	122.405	128.366	143.843	149.302	151.677	129.036	156.522	144.588	139.516	152.3
YBR203W	62.505	26.5016	59.1684	45.6558	35.3714	50.6854	106.544	131.868	77.3614	119.563	94.871	93.7759
YBR205W	171.889	113.578	129.801	111.824	103.756	132.774	125.041	122.112	140.33	127.652	161.141	173.177
YBR207W	74.7828	60.5752	89.8619	76.7547	73.1008	80.4355	87.3066	107.95	94.0031	93.0214	57.8992	61.2624
YBR210W	27.3459	24.6087	31.4332	21.1737	29.8691	29.1992	25.896	20.1422	21.5892	30.5858	21.625	19.8504
YBR212W	193.654	134.401	187.86	147.554	249.958	182.082	140.578	134.701	126.837	141.049	93.8246	112.942
YBR213W	24.5555	17.0368	17.0109	21.8354	24.3669	23.4144	13.3179	9.44166	18.8906	13.1443	19.881	16.0857
YBR214W	252.81	204.441	251.466	186.593	234.237	193.1	168.694	145.087	117.391	128.157	129.401	151.958
YBR215W	57.4823	60.5752	73.9604	63.5211	92.7515	93.3823	63.2603	55.0763	37.3314	70.0188	44.994	42.781
YBR217W	8.37121	11.3578	8.87525	11.2485	11.7905	11.0186	14.0578	23.6041	14.3928	27.5525	7.3246	9.92519
YBR225W	47.4368	47.3244	58.059	37.054	52.664	41.8705	75.4684	76.4774	60.7197	81.3937	61.0383	62.9736
YBR228W	11.1616	5.67892	8.50545	9.92517	12.5765	10.7431	15.9075	23.9189	14.8426	32.1025	12.9052	7.52946
YBR230W-A	55.8081	39.7525	54.3609	51.6109	44.8037	44.9006	16.6474	21.4011	12.1439	18.1998	10.8125	13.3477
YBR233W	42.9722	32.1806	58.4288	46.9791	44.8037	60.8776	38.1041	36.5077	30.5847	36.1469	31.7399	23.9574
YBR233W-A	17.3005	11.3578	19.5995	9.92517	10.2184	25.6182	7.39886	7.2386	6.74663	11.1221	10.8125	9.92519
YBR235W	53.5757	47.3244	36.9802	35.7306	29.0831	36.9122	109.133	109.523	102.999	124.366	91.0343	96.8562
YBR237W	21.7651	7.5719	26.256	28.4522	25.939	38.565	63.2603	73.6449	44.9776	81.8993	45.6915	37.9895
YBR242W	82.5959	88.9698	72.851	75.4313	71.5287	80.711	44.3932	41.858	42.2789	64.9633	58.9456	47.2302
YBR244W	11.7197	5.67892	12.5733	17.2036	15.7206	11.845	12.2081	15.1066	13.0435	15.9249	10.4637	7.8717
YBR246W	43.5303	24.6087	47.3347	39.039	51.092	55.0928	84.717	84.3455	89.9551	78.6132	48.4819	51.6794
YBR250W	2.23232	0	0.739604	0	0	0.550928	2.95954	2.8325	3.14843	3.28608	5.23185	4.10698
YBR251W	143.985	81.3979	152.728	140.276	132.053	161.697	63.2603	79.6246	68.8157	78.3604	66.9677	64.3426
YBR252W	80.3636	123.043	115.378	136.306	91.9655	122.857	54.3816	54.7616	76.4618	74.8216	54.4113	69.8186
YBR253W	22.3232	26.5016	31.4332	27.7905	27.5111	29.4747	36.2544	30.8427	20.6897	36.3997	22.6714	18.1391
YBR255W	15.6263	24.6087	33.652	30.4372	22.0088	33.6066	39.214	49.4113	23.3883	56.6217	27.5544	24.2996
YBR257W	35.1591	17.0368	39.199	39.039	34.5853	40.4932	20.7168	28.6397	18.8906	30.0803	15.6956	18.4814
YBR259W	13.952	17.0368	19.5995	10.5868	12.5765	22.0371	46.2429	45.9494	46.3269	59.1495	41.506	31.8291
YBR263W	258.949	219.585	136.457	112.485	124.979	150.679	109.133	114.559	134.933	121.332	213.808	239.916
YBR265W	68.0858	60.5752	103.914	75.4313	84.8912	93.9333	80.2776	76.4774	80.5098	70.5244	53.7137	58.5244
YBR267W	101.571	121.15	116.858	94.62	114.76	147.649	68.4395	53.188	66.5668	62.4356	55.1089	59.5511
YBR268W	59.1565	66.2541	67.304	66.8295	44.0177	75.7526	27.0058	27.0661	29.6852	28.8164	34.5302	35.936
YBR271W	28.4621	24.6087	28.8446	27.7905	32.2272	42.9724	35.8845	36.8225	39.5803	36.1469	28.9496	22.5884
YBR274W	34.0429	39.7525	40.6782	28.4522	23.5809	38.2895	54.0117	63.8885	56.6717	66.2272	49.1794	47.5725
YBR278W	17.3005	26.5016	31.4332	28.4522	25.153	29.7501	25.1561	28.0102	19.3404	27.2998	18.8347	15.7434
YBR279W	115.523	71.933	182.682	132.997	176.857	168.309	96.9251	107.635	73.7632	114.002	72.5484	56.1287
YBR282W	133.381	107.9	170.109	118.44	131.267	141.313	49.5724	45.3199	42.7287	59.655	42.2036	43.1232
YBR284W	4.46464	3.78595	6.28664	7.94014	7.07427	7.43753	21.4567	33.6752	20.2399	29.5747	20.5786	20.8771
YBR285W	12.8359	5.67892	4.80743	3.30839	7.07427	3.58103	0.369943	2.51777	2.69865	2.52776	3.13911	5.13372
YBR286W	842.144	717.438	668.602	649.106	677.558	638.526	546.036	537.23	596.402	568.492	670.724	713.245
YBR287W	151.24	111.686	157.536	116.455	110.83	120.378	162.775	178.762	173.613	176.69	125.565	161.541
YBR289W	135.055	202.548	139.046	117.779	235.023	134.426	147.977	148.234	122.339	157.226	145.097	119.102
YBR290W	73.6666	56.7892	95.409	69.4762	85.6773	95.8615	48.8325	64.8327	32.8336	66.48	41.8548	45.1767
YBR293W	6.13889	1.89297	5.17723	8.60181	3.93015	7.43753	68.4395	84.9749	64.3179	85.6909	25.8105	21.2194
YBR294W	0	0	1.10941	0.661678	0.78603	2.20371	5.54915	3.14722	4.04798	4.54996	1.39516	0.342248
YBR295W	25.6717	13.2508	26.6258	11.2485	14.9346	16.2524	90.636	134.701	75.1125	90.7464	69.0605	64.3426
YBR297W	19.5328	17.0368	28.4748	29.7755	29.0831	34.7085	36.2544	39.3402	38.2309	38.9274	23.7177	23.2729
YBR299W	40.1818	17.0368	18.4901	13.8952	14.9346	28.3728	23.6764	32.7311	30.5847	23.5081	33.4839	35.936
YCL064C	38.5076	24.6087	22.5579	22.4971	18.8647	30.3011	20.3469	22.0305	18.8906	27.5525	29.2984	35.936
YCL061C	115.523	96.5417	184.531	168.066	191.791	207.7	155.376	195.442	98.5009	239.631	138.121	99.2519
YCL059C	219.884	206.334	341.697	294.447	333.277	380.967	172.393	161.452	161.02	197.67	160.792	156.407
YCL057C-A	284.063	234.729	281.42	306.357	224.805	241.031	143.168	170.265	161.02	151.413	146.143	170.782
YCL056C	16.7424	5.67892	31.4332	23.1587	24.3669	31.1274	27.0058	34.9341	23.3883	33.8719	22.6714	19.8504
YCL052C	127.242	88.9698	119.816	104.545	98.2538	123.959	179.052	174.985	151.574	187.054	158.7	170.439
YCL050C	756.757	753.404	667.863	760.268	831.62	722.818	415.446	358.783	376.462	397.616	395.179	379.895
YCL049C	183.609	162.796	160.124	109.839	158.778	187.591	195.7	192.295	190.255	153.182	149.98	165.306
YCL047C	90.9671	107.9	68.7832	49.6259	55.8081	70.2433	40.6937	54.7616	49.9251	53.0829	84.0585	74.2678
YCL045C	566.452	469.458	432.669	378.48	438.605	456.444	423.585	451.311	425.937	437.049	537.137	553.415
YCL044C	136.73	104.114	110.201	92.6349	129.695	123.408	117.642	116.762	120.09	99.3408	117.542	138.61
YCL043C	2286.46	2029.27	1760.26	1595.31	1516.25	1798.23	1616.65	1668.34	1916.04	1302.55	1906.49	2457.34
YCL041C	116.081	87.0768	91.3412	91.9732	111.616	104.676	133.919	126.518	148.876	109.452	157.653	173.862
YCL038C	75.3409	64.3611	63.2362	64.1828	63.6684	60.0512	80.6476	90.9546	86.3569	85.4381	91.3831	103.701
YCL037C	534.083	577.357	576.152	626.609	756.947	773.779	610.776	490.337	526.687	492.912	402.853	383.318
YCL035C	435.303	494.066	498.863	494.274	507.775	432.479	198.289	208.031	213.643	233.817	212.413	222.119
YCL033C	180.818	151.438	145.332	124.395	108.472	157.29	92.1158	94.1018	100.3	88.977	114.403	153.327
YCL031C	162.96	176.047	250.356	234.234	242.097	242.133	172.024	180.965	116.042	251.764	155.212	134.846
YCL030C	593.798	550.856	796.554	813.864	672.842	766.892	634.822	673.505	679.161	708.53	498.073	539.725
YCL029C	69.7601	121.15	92.8204	76.093	77.0309	95.8615	69.9192	69.2388	56.2219	77.6021	67.3165	53.3907
YCL026C-B	145.659	132.508	55.8401	37.054	33.0133	37.7386	12.948	21.4011	24.7377	14.661	35.9254	56.1287
YCL026C-A	3.90656	0	1.47921	0.661678	1.57206	2.20371	0.739886	0	0.899551	0	1.74395	1.02674
YCL025C	493.343	469.458	820.591	719.906	817.471	747.885	867.886	865.485	883.809	854.129	565.738	530.827
YCL017C	439.767	386.167	461.513	371.863	372.578	468.84	281.157	322.905	313.044	288.164	370.415	392.901
YCL016C	65.2954	34.0735	50.2931	41.024	62.0964	54.8174	86.5667	73.9596	76.9116	79.3715	50.2258	53.0484
YCL012C	102.687	66.2541	83.2055	72.1229	71.5287	79.6091	58.8209	74.5891	58.0211	50.8079	72.5484	80.086
YCL011C	218.768	236.622	257.382	265.995	227.163	244.337	322.96	340.844	266.717	376.888	273.8	232.044
YCL010C	53.5757	47.3244	83.5753	61.5361	79.389	94.7597	128.37	130.61	110.195	140.796	56.8528	51.3372
YCL009C	782.429	921.879	619.419	541.253	658.693	615.387	700.302	608.672	710.645	519.454	982.891	1015.79
YCL008C	87.6186	88.9698	84.6847	77.4163	112.402	101.095	117.642	119.909	140.33	112.738	114.752	119.787
YCL002C	22.8813	20.8227	21.0787	11.2485	12.5765	23.139	61.0406	74.9038	63.8681	66.48	49.5282	44.8345
YCR002C	365.543	352.093	396.428	398.992	365.504	398.597	271.168	272.234	248.726	313.442	248.339	244.365
YCR004C	599.379	499.745	491.097	499.567	440.177	449.006	278.197	300.559	264.018	296	301.355	335.745
YCR005C	692.578	566	763.642	712.627	691.706	698.302	676.626	708.439	644.079	686.286	436.337	537.672
YCR007C	6.13889	5.67892	13.6827	13.8952	21.2228	18.4561	28.1157	32.7311	28.3359	32.3553	11.1613	14.3744
YCR009C	323.129	287.732	425.642	381.127	370.22	418.705	233.804	241.392	217.691	258.084	217.645	186.867
YCR010C	1.67424	0	1.10941	0.661678	1.57206	0.826392	1.10983	1.25889	0.899551	0.505551	0.697581	0
YCR011C	253.369	166.582	287.706	270.626	273.538	283.728	417.666	438.093	380.51	503.529	331.002	365.863
YCR014C	11.7197	5.67892	7.76585	3.97007	4.71618	6.8866	49.9423	88.4368	27.4363	96.5603	34.879	30.8023
YCR015C	31.8106	37.8595	71.3718	61.5361	58.1662	70.2433	60.3007	67.9799	53.5233	89.2298	35.2278	34.9093
YCR017C	308.619	259.338	299.54	232.249	328.561	307.418	568.972	530.306	550.525	526.531	504.002	497.286
YCR020C	5.02273	0	12.2035	9.26349	10.2184	12.9468	31.8151	45.3199	34.6327	46.7635	14.3004	15.4012
YCR020C-A	69.7601	64.3611	100.216	93.9583	76.2449	85.1184	41.4336	61.3708	51.7242	66.9855	45.3427	54.7597
YCR021C	16.1843	9.46487	52.8817	41.024	36.1574	31.9538	28.4856	52.8733	24.2879	34.883	13.254	12.6632
YCR022C	0	0	0	0	0	0	2.95954	2.8325	3.14843	1.76943	1.04637	1.36899
YCR023C	58.0404	39.7525	68.4134	52.2726	58.9523	65.285	168.324	180.336	157.871	205.507	122.077	125.263
YCR024C	133.939	92.7558	94.2996	74.7696	74.6729	87.0467	88.0464	113.929	98.5009	99.8463	101.847	127.658
YCR024C-B	2.7904	1.89297	1.10941	0.661678	0	1.92825	490.544	504.499	323.838	447.413	515.861	560.602
YCR024C-A	173.563	213.906	146.811	83.3714	152.49	65.5605	157.966	155.787	144.378	92.0103	187.649	108.835
YCR025C	0	0	0.369802	0.661678	0	0.550928	3.32949	1.57361	3.5982	3.53886	4.18548	1.71124
YCR026C	158.495	138.187	189.709	158.803	203.582	211.006	229.735	234.468	202.399	242.917	188.696	163.937
YCR027C	41.298	35.9665	77.2887	55.581	36.1574	66.6623	48.4625	59.1677	55.3224	60.6661	28.252	31.4868
YCR028C	61.9469	54.8963	95.409	65.5061	71.5287	83.1902	125.411	129.665	138.531	137.763	87.1976	97.5407
YCR028C-A	419.119	367.237	352.791	386.42	277.469	393.087	146.497	147.29	153.823	171.129	149.631	182.076
YCR030C	503.947	395.632	567.646	488.318	581.662	488.949	484.995	469.565	406.597	438.818	376.694	452.452
YCR031C	1403.01	2084.17	1349.04	1612.51	1458.09	1191.93	1657.34	1791.71	2158.92	1505.53	1972.41	1831.71
YCR035C	153.472	162.796	208.199	193.21	205.94	244.888	150.937	142.254	107.946	171.129	107.427	97.1984
YCR037C	202.025	176.047	190.078	150.863	187.861	203.843	195.33	213.696	198.351	235.587	234.387	221.092
YCR038C	13.3939	18.9297	17.3807	17.2036	12.5765	19.007	70.2892	59.1677	49.4753	66.48	41.506	47.5725
YCR042C	183.05	123.043	221.142	166.743	210.656	233.869	317.411	329.828	214.543	373.602	269.266	252.579
YCR043C	140.636	132.508	115.008	97.2667	95.8957	111.838	75.8383	78.9952	73.3134	98.5825	110.567	99.5942
YCR044C	74.7828	85.1839	61.0174	48.3025	51.878	57.572	81.3875	90.0104	77.3614	78.866	78.8266	80.7705
YCR045C	1.11616	0	1.10941	0.661678	0.78603	0	0.739886	0.944166	1.7991	1.0111	1.04637	1.02674
YCR046C	258.949	198.762	204.501	201.812	189.433	197.783	134.289	125.889	134.933	128.157	149.98	168.728
YCR047C	119.429	136.294	115.008	101.898	113.974	146.822	72.5088	63.2591	73.7632	86.1965	69.0605	70.1608
YCR054C	82.5959	73.826	136.087	119.764	128.909	157.015	111.723	119.28	102.999	130.179	62.4335	59.2089
YCR057C	197.002	174.154	249.617	242.174	231.879	311.825	404.718	370.113	444.378	404.694	334.141	296.387
YCR059C	108.826	87.0768	67.304	53.5959	62.8824	80.711	103.584	100.711	90.8547	100.605	118.589	132.108
YCR064C	0	0	1.10941	0	0	0.275464	2.21966	0.629444	2.24888	1.0111	2.44153	1.36899
YCR067C	299.131	251.766	198.954	177.991	210.656	215.137	398.059	400.011	387.257	393.066	360.998	378.869
YCR071C	149.008	153.331	165.302	154.833	152.49	175.195	77.688	92.5282	87.7062	99.8463	82.3145	81.455
YCR072C	162.96	166.582	181.573	181.961	180.001	236.073	140.208	126.833	165.967	137.257	138.47	116.707
YCR073C	42.4141	43.5384	45.1159	29.7755	33.0133	46.8289	149.087	172.782	111.095	151.16	155.212	139.637
YCR075C	43.5303	20.8227	35.501	33.7456	41.6596	31.9538	62.1504	57.5941	67.0166	55.1051	44.6452	43.4655
YCR076C	75.3409	54.8963	85.7941	72.7846	84.1052	80.1601	59.9308	63.5738	61.6193	54.5995	38.0181	45.8612
YCR077C	671.371	577.357	894.921	869.445	925.157	880.934	751.724	721.657	694.454	728.499	543.764	525.008
YCR084C	572.591	450.528	554.334	518.756	569.872	573.792	725.828	703.403	640.48	602.364	712.927	724.197
YCR087C-A	107.151	121.15	139.046	126.381	144.63	147.924	48.4625	41.5433	57.5713	67.9966	67.3165	46.2035
YCR090C	113.848	87.0768	87.6431	82.0481	85.6773	101.371	73.6187	76.7921	84.5578	86.1965	113.357	99.2519
YCR092C	79.8055	60.5752	82.0961	78.078	88.8214	93.1069	96.1852	106.376	81.8592	131.443	103.94	94.8027
YCR095C	50.7853	53.0033	62.8664	68.8145	51.092	65.8359	59.5608	69.5535	48.126	66.48	54.0625	48.9415
YCR098C	8.92929	7.5719	11.0941	10.5868	7.8603	8.53939	38.844	51.6144	35.982	53.8412	15.3468	14.3744
YCR102C	10.0455	3.78595	1.84901	2.64671	1.57206	1.65278	5.1792	18.5686	7.19641	18.7054	13.6028	20.5349
YCL063W	113.29	85.1839	110.941	89.9882	96.6817	126.438	81.3875	83.716	96.252	89.4825	92.7782	92.0647
YCL058W-A	55.25	62.4682	48.0743	55.581	60.5243	66.1114	20.7168	17.9391	23.3883	31.8497	26.1593	27.0376
YCL057W	493.901	389.953	429.34	359.291	376.508	429.724	375.492	398.753	408.396	390.033	405.294	495.233
YCL055W	88.1767	85.1839	91.711	84.6948	100.612	111.287	63.6302	58.5383	46.7767	68.2494	50.9234	45.1767
YCL054W	346.568	348.307	385.704	315.62	372.578	449.282	251.931	248.001	192.954	316.981	259.5	209.798
YCL051W	77.0151	71.933	80.6169	67.4912	107.686	91.1786	134.289	142.254	105.697	133.971	77.0827	89.669
YCL048W	7.25505	1.89297	4.43763	3.30839	1.57206	2.47918	4.80926	3.46194	7.19641	3.28608	4.18548	4.44922
YCL040W	1545.88	1219.08	1836.81	1808.37	1746.56	1649.48	1399.49	1517.59	1566.57	1348.81	982.891	1430.94
YCL039W	119.987	94.6487	124.993	113.809	144.63	115.97	183.862	173.726	165.517	164.81	141.609	137.926
YCL036W	44.0884	34.0735	61.0174	55.581	51.878	73.2735	96.9251	83.4013	110.645	87.2076	73.5948	67.7651
YCL034W	184.167	177.94	258.862	236.881	243.669	244.612	149.827	173.412	160.57	170.623	140.911	145.113
YCL032W	90.4091	88.9698	109.461	97.2667	99.0398	124.785	82.4973	84.9749	60.2699	87.7131	69.7581	64.3426
YCL028W	651.28	664.434	585.767	637.858	643.759	628.058	277.827	292.377	300.9	284.372	313.214	355.938
YCL027W	11.7197	11.3578	9.61486	5.29342	11.0044	10.1922	14.4278	12.2742	8.99551	9.85825	12.2077	9.2407
YCL024W	98.7803	71.933	157.536	105.207	134.411	138.283	238.243	237.93	161.919	247.973	168.117	139.979
YCL021W-A	1.67424	7.5719	1.84901	0.661678	0.78603	0.826392	7.02892	2.8325	6.74663	6.31939	12.9052	13.3477
YCL018W	49.1111	79.5049	119.446	95.2816	93.5376	80.4355	243.423	341.158	201.499	311.167	126.96	120.814
YCL014W	181.934	149.545	157.166	121.749	156.42	156.188	321.48	340.844	206.447	369.811	391.692	338.141
YCL005W-A	202.583	213.906	163.083	178.653	140.699	161.697	112.833	117.391	109.745	107.43	136.726	148.193
YCL005W	38.5076	22.7157	31.0634	18.527	21.2228	27.5464	64.74	69.5535	75.1125	71.2827	58.9456	52.0217
YCL004W	38.5076	20.8227	48.8139	46.9791	53.45	52.8891	95.0754	114.559	77.8112	98.5825	61.3871	61.9469
YCL001W	193.654	155.224	189.339	199.165	168.21	184.561	119.862	127.777	123.688	143.577	136.028	131.765
YCR003W	209.838	204.441	293.993	231.587	248.385	259.212	92.8557	117.391	97.1515	133.213	100.452	108.835
YCR008W	102.129	87.0768	69.5228	52.9342	70.7427	68.0396	227.145	249.574	169.565	258.337	220.784	209.114
YCR012W	7093.76	9750.71	5711.97	8131.36	7250.34	6015.86	9620.37	7813.28	10905.7	7582.51	9874.6	10976.9
YCR016W	152.914	143.866	177.875	189.24	192.577	209.353	59.1909	70.4977	39.5803	97.0658	74.6411	67.4229
YCR019W	36.8333	37.8595	61.3872	41.024	30.6552	57.572	60.3007	70.8124	64.3179	61.93	44.6452	34.567
YCR020W-B	42.4141	28.3946	105.394	100.575	111.616	117.623	28.1157	50.0408	20.2399	59.1495	16.0444	10.2674
YCR032W	43.5303	43.5384	63.606	44.9941	51.092	48.4817	210.868	269.402	133.583	330.125	199.508	159.488
YCR033W	112.732	119.257	79.5075	54.9193	77.817	75.4772	178.313	177.188	85.0076	204.495	246.246	186.525
YCR034W	556.964	478.923	479.264	465.16	492.841	492.805	411.747	383.331	468.216	435.279	550.391	518.506
YCR036W	208.164	166.582	235.564	193.21	206.726	236.899	223.076	255.554	273.014	261.37	142.655	160.857
YCR045W-A	0	0	0	0	0.78603	0.550928	24.0463	19.8275	17.991	19.7165	7.3246	11.6364
YCR048W	70.8762	81.3979	38.0896	33.7456	54.2361	44.9006	106.174	78.9952	97.6013	92.0103	118.24	102.674
YCR051W	180.26	193.083	215.595	172.698	191.005	197.232	126.89	97.249	128.636	123.354	105.335	118.418
YCR052W	237.742	217.692	244.439	197.18	243.669	255.355	194.22	199.219	191.155	184.273	226.365	235.467
YCR053W	1452.13	1593.88	1493.63	1697.2	1572.06	1536.81	1415.77	1288.16	1437.93	1327.32	1254.25	1207.11
YCR061W	234.952	181.726	155.687	125.719	166.638	144.894	167.214	137.533	134.033	145.093	177.883	216.643
YCR063W	23.4394	24.6087	66.5644	56.9043	81.7471	64.7341	58.8209	54.7616	46.3269	45.4996	23.0202	19.1659
YCR065W	107.71	96.5417	163.083	125.057	140.699	123.683	246.382	217.788	206.447	225.981	168.466	164.621
YCR066W	37.3914	49.2173	51.7723	51.6109	61.3103	65.285	54.0117	54.7616	36.8816	56.1162	40.8085	36.6205
YCR068W	45.7626	34.0735	62.4966	56.9043	62.0964	53.44	105.434	103.858	92.204	97.3186	63.131	69.4763
YCR069W	184.725	170.368	143.483	130.351	141.485	154.26	157.226	152.64	122.339	142.818	149.98	147.851
YCR073W-A	218.209	193.083	248.877	220.339	249.958	253.427	164.995	155.158	164.168	139.279	139.865	133.477
YCR075W-A	40.1818	51.1103	44.0065	39.039	30.6552	45.4516	24.4162	28.0102	22.4888	34.1247	25.4617	29.7756
YCR079W	32.3687	18.9297	18.1203	9.92517	21.2228	19.8334	68.4395	71.7566	50.8246	73.0521	64.5262	57.8399
YCR081W	43.5303	28.3946	61.3872	62.8594	47.1618	63.0813	156.486	186.945	98.9506	207.529	139.167	128.343
YCR082W	123.894	147.652	179.354	130.351	159.564	146.822	126.89	159.564	154.723	140.796	100.8	119.445
YCR083W	89.851	81.3979	84.3149	82.0481	89.6074	95.3106	51.792	62.0002	64.3179	67.2383	63.4798	62.9736
YCR085W	0	0	0	0	0	0.550928	1.10983	0.629444	0	0.758327	1.39516	1.36899
YCR086W	100.455	92.7558	102.805	84.6948	109.258	94.7597	39.5839	48.7819	42.2789	41.2024	43.9476	42.4387
YCR088W	1383.48	1372.41	1288.39	1122.87	1258.43	1246.48	590.059	580.347	598.651	520.97	645.262	776.561
YCR089W	2.7904	5.67892	11.0941	11.9102	7.07427	13.4977	305.573	317.554	201.05	301.056	116.496	113.626
YCR091W	42.9722	20.8227	59.908	48.3025	69.1706	53.991	90.636	66.721	47.6762	83.4159	41.506	42.781
YCR093W	587.101	448.635	461.883	385.758	446.465	482.062	925.227	1016.87	669.716	1033.6	1070.44	1046.59
YCR094W	116.081	104.114	117.597	96.605	104.542	115.419	151.307	155.158	148.426	169.612	116.147	133.819
YCR095W-A	0	0	0	0	0	0.275464	5.91909	5.97971	4.49776	6.82494	1.74395	1.36899
YCR097W	0	0	0	0	0	0	0	0	0	0	0	0
YCR105W	6.69697	9.46487	4.80743	11.2485	3.14412	4.40743	5.1792	5.35027	5.39731	6.31939	5.23185	7.8717
YCR106W	14.5101	11.3578	41.7877	25.8054	28.2971	38.2895	135.769	162.396	132.684	173.404	74.9899	67.0806
YCR107W	2.7904	1.89297	9.61486	3.97007	7.07427	7.43753	60.6707	86.8632	52.174	80.6354	36.623	33.1981
YDL243C	4.46464	1.89297	6.65644	3.30839	2.35809	4.40743	31.8151	46.5788	29.6852	37.4108	14.3004	14.7167
YDL239C	0.558081	3.78595	1.10941	1.32336	0	0.826392	13.6879	32.7311	8.09596	31.5969	26.8569	17.4546
YDL238C	16.7424	1.89297	26.9956	22.4971	16.5066	27.2709	36.9943	44.3758	39.1305	41.708	30.6935	30.8023
YDL235C	149.008	111.686	92.8204	61.5361	67.5986	93.9333	44.7631	62.9444	56.6717	69.5133	77.4315	99.5942
YDL234C	86.5025	60.5752	143.113	97.9284	105.328	111.563	99.1447	136.589	76.0121	116.782	80.2218	79.0593
YDL231C	3.90656	3.78595	5.54703	4.63175	7.07427	6.33567	218.266	268.772	153.823	278.053	84.4073	83.1663
YDL227C	75.3409	71.933	39.9386	52.2726	58.1662	78.5073	41.4336	33.0458	54.4228	43.9829	56.1552	56.8132
YDL226C	191.422	160.903	288.816	278.566	287.687	306.316	155.376	145.401	159.67	147.874	124.867	114.995
YDL224C	136.172	106.007	123.514	123.734	123.407	124.234	176.093	174.356	147.077	166.579	136.726	133.134
YDL222C	20.0909	3.78595	25.5164	25.8054	23.5809	26.1691	24.7862	28.325	30.5847	28.3109	5.23185	17.1124
YDL220C	20.649	15.1438	27.7352	13.8952	17.2927	29.1992	71.399	65.4621	54.4228	62.1828	41.8548	48.257
YDL217C	61.3889	51.1103	95.409	86.0181	73.8868	93.6578	41.4336	43.4316	50.8246	52.5773	38.0181	31.4868
YDL216C	13.952	13.2508	20.7089	16.542	22.0088	22.0371	19.237	26.4366	16.1919	32.1025	16.7419	12.6632
YDL215C	145.659	85.1839	200.063	150.201	164.28	197.508	266.729	320.387	239.73	305.858	133.238	154.696
YDL214C	6.13889	1.89297	2.21881	3.30839	1.57206	2.47918	6.65897	16.0508	6.29686	9.35269	8.37097	10.6097
YDL213C	119.429	117.364	125.363	132.997	165.852	172.716	62.5204	66.4063	55.7722	84.6798	70.4556	54.7597
YDL211C	11.7197	7.5719	11.0941	9.92517	13.3625	8.26392	19.237	19.198	20.2399	24.5192	17.0907	13.0054
YDL209C	23.9975	26.5016	30.3238	29.1138	38.5155	31.9538	23.6764	24.2336	22.4888	30.0803	17.7883	13.6899
YDL205C	43.5303	13.2508	61.757	37.054	55.0221	55.9192	55.1215	62.3149	48.5758	71.5355	36.2742	39.3585
YDL203C	56.9242	45.4314	62.4966	56.9043	61.3103	75.2017	98.4048	95.6754	95.8022	101.363	55.4577	57.4977
YDL200C	27.904	7.5719	18.4901	19.8503	14.9346	23.6899	15.1677	16.6803	12.1439	25.0248	14.998	22.5884
YDL199C	20.649	9.46487	22.5579	9.92517	15.7206	13.2223	24.7862	22.3453	17.991	25.2776	17.4395	26.0108
YDL198C	262.856	217.692	196.365	181.961	136.769	185.112	125.781	118.65	127.286	131.696	147.538	168.728
YDL197C	7.81313	5.67892	12.2035	5.9551	11.0044	12.1204	95.8152	99.4521	60.2699	96.5603	31.3911	28.4066
YDL190C	125.01	94.6487	189.709	146.231	143.843	200.262	192	196.701	163.718	214.101	156.258	148.536
YDL188C	125.568	111.686	119.446	107.192	107.686	119.551	109.133	111.726	121.889	127.904	119.984	133.819
YDL187C	0	0	0	0	0	0	5.54915	2.8325	4.04798	4.54996	1.04637	1.71124
YDL184C	176.912	282.053	208.199	253.423	232.665	200.813	128.37	100.082	106.147	121.838	138.121	132.792
YDL183C	21.2071	13.2508	21.0787	18.527	11.0044	19.007	12.948	13.533	14.3928	12.8916	10.1149	10.9519
YDL177C	8.37121	9.46487	8.87525	7.27846	11.0044	10.1922	15.1677	14.1625	8.09596	17.1887	11.1613	11.2942
YDL175C	49.1111	53.0033	73.2208	54.9193	72.3148	82.9147	33.2949	42.8022	37.3314	43.9829	30.6935	18.8236
YDL174C	196.444	119.257	203.761	161.449	356.072	334.138	392.14	211.178	383.209	205.254	158.351	174.204
YDL171C	692.02	564.107	319.879	283.198	320.7	321.191	732.117	679.799	639.131	706.76	1359.93	1374.81
YDL169C	9.48737	13.2508	11.4639	8.60181	11.0044	9.91671	5.1792	7.86805	6.74663	8.08882	11.1613	7.52946
YDL167C	59.7146	58.6822	85.4243	70.1379	91.9655	91.1786	112.093	126.203	99.8502	133.971	95.2198	74.2678
YDL166C	56.9242	39.7525	71.7416	66.1678	64.4545	84.292	34.7746	38.3961	32.8336	33.6191	42.2036	28.0643
YDL164C	88.7348	96.5417	104.654	76.093	104.542	113.491	82.1273	87.4927	81.8592	97.0658	80.5706	65.7116
YDL160C-A	9.48737	11.3578	17.7505	19.1887	9.43236	16.2524	6.28903	7.86805	5.84708	10.3638	8.02218	11.6364
YDL160C	251.694	212.013	657.878	627.271	695.637	699.128	441.342	429.281	482.159	455.249	154.863	162.226
YDL157C	88.7348	70.0401	87.6431	80.063	90.3935	90.3522	30.7053	30.528	36.4318	39.1802	45.3427	55.7864
YDL153C	119.987	115.471	153.838	142.922	144.63	184.285	78.7979	79.9393	41.8291	132.202	88.9415	62.2891
YDL148C	136.73	130.615	231.126	191.225	220.088	274.362	115.422	150.752	77.3614	181.746	120.681	88.9845
YDL145C	467.113	388.06	400.866	316.282	363.146	414.298	571.562	609.616	569.416	604.639	672.119	649.587
YDL144C	58.0404	32.1806	53.6213	35.7306	29.8691	50.9609	57.7111	55.0763	53.0735	51.3134	58.248	68.4496
YDL142C	31.2525	32.1806	28.8446	21.1737	29.8691	29.7501	27.3758	38.0813	29.2354	36.1469	33.4839	27.3798
YDL140C	397.911	253.659	276.982	240.189	249.958	296.399	658.499	661.86	541.98	614.75	685.373	731.384
YDL139C	17.8586	13.2508	24.7768	16.542	16.5066	26.1691	9.24858	10.0711	8.54574	15.1665	11.5101	10.2674
YDL135C	121.662	111.686	119.446	134.321	111.616	145.721	62.5204	64.2033	47.2264	74.8216	65.2238	70.5031
YDL134C	147.891	143.866	175.286	157.479	155.634	174.644	147.977	160.193	141.23	170.876	132.54	143.06
YDL133C-A	176.912	282.053	208.199	253.423	232.665	200.813	128.37	100.082	106.147	121.838	138.121	132.792
YDL126C	1310.37	1099.82	1251.41	1159.26	1245.07	1321.68	934.106	968.399	1010.65	914.036	1045.67	1117.1
YDL125C	213.187	187.405	179.724	175.345	175.285	190.07	212.717	223.453	222.639	191.098	129.401	136.899
YDL121C	78.6894	64.3611	86.9035	76.093	56.5942	88.6994	47.3527	44.6905	43.1785	58.3911	40.1109	45.1767
YDL119C	52.4596	45.4314	47.3347	27.7905	34.5853	47.6553	34.7746	42.4874	38.6807	41.4552	29.2984	31.8291
YDL115C	35.1591	39.7525	48.4441	38.3773	52.664	46.278	29.2255	39.9697	25.1874	53.5884	24.0665	19.1659
YDL113C	59.7146	43.5384	67.304	50.2875	52.664	59.7757	65.11	73.0155	43.6282	83.9215	44.2964	36.9628
YDL111C	66.9697	68.1471	93.56	88.6649	113.974	117.348	97.295	96.6196	109.295	95.2964	65.2238	64.3426
YDL110C	184.725	138.187	186.011	144.246	146.988	140.487	62.1504	70.183	56.2219	66.9855	51.621	46.2035
YDL109C	1.67424	5.67892	7.39604	3.97007	0.78603	2.47918	59.1909	68.9241	50.3749	67.4911	19.5323	19.1659
YDL106C	63.6212	66.2541	86.5337	97.2667	98.2538	94.7597	78.7979	89.6957	52.6237	81.6465	61.3871	50.9949
YDL104C	25.6717	13.2508	24.0371	14.5569	13.3625	24.7918	16.2775	16.3655	13.4933	18.1998	10.4637	12.3209
YDL103C	250.578	191.19	232.975	211.737	228.735	225.054	109.873	102.285	109.745	125.882	118.938	104.728
YDL101C	83.154	77.612	77.2887	64.1828	69.1706	85.6693	57.7111	73.0155	49.0255	73.3049	65.2238	71.5298
YDL100C	411.863	403.204	454.117	438.031	427.6	473.523	305.943	279.473	277.062	313.189	292.984	290.911
YDL098C	10.0455	11.3578	19.2297	9.26349	14.9346	19.558	5.91909	10.0711	8.99551	13.9027	12.9052	14.7167
YDL097C	309.177	304.769	470.388	414.21	406.378	472.696	248.602	277.585	253.673	289.428	233.69	225.541
YDL094C	0	0	0	0	0	0	4.43932	2.51777	1.7991	2.27498	1.39516	1.02674
YDL091C	45.7626	32.1806	45.1159	41.024	43.2317	41.8705	27.7457	47.2083	29.2354	47.269	33.8327	40.043
YDL090C	38.5076	17.0368	24.4069	27.1288	27.5111	41.5951	44.3932	36.193	26.9865	37.158	27.5544	31.8291
YDL088C	102.129	96.5417	102.435	100.575	103.756	121.204	120.601	112.985	85.4574	125.377	87.8952	85.2197
YDL087C	17.8586	5.67892	28.8446	27.1288	18.0787	26.9955	28.1157	23.6041	20.2399	21.4859	11.8589	14.3744
YDL086C-A	0	0	0	0	0	0.275464	1.47977	2.20305	2.24888	1.0111	1.39516	0.342248
YDL085C-A	36.2752	30.2876	34.7614	15.8803	30.6552	31.1274	10.7283	8.49749	8.99551	12.6388	9.41734	17.1124
YDL083C	766.245	866.983	672.3	733.801	712.929	622.549	764.672	719.769	854.574	718.135	889.067	712.903
YDL081C	663.558	768.548	590.204	678.22	582.448	503.273	452.81	428.966	527.587	511.112	537.835	553.757
YDL080C	18.4167	13.2508	27.3654	22.4971	22.7949	28.6483	79.9077	74.9038	63.4184	67.7438	46.7379	42.0965
YDL079C	3.34848	1.89297	9.24506	3.30839	11.0044	6.61114	9.98846	7.86805	8.99551	15.6721	5.92944	8.21395
YDL078C	266.204	232.836	263.669	240.851	260.176	260.589	154.266	169.32	163.718	151.918	176.488	196.108
YDL077C	40.7399	26.5016	41.4179	35.0689	40.8736	55.0928	82.1273	98.1932	64.3179	98.0769	80.5706	72.8988
YDL076C	33.4848	41.6454	41.4179	37.054	47.1618	42.9724	45.133	43.4316	37.3314	43.7302	28.6008	31.1446
YDL074C	91.5252	79.5049	130.54	129.027	122.621	139.66	96.9251	131.239	71.9641	158.237	120.333	90.3535
YDL072C	267.879	200.655	292.883	245.483	260.962	279.045	209.758	230.691	253.224	234.323	171.954	209.456
YDL069C	11.1616	1.89297	13.3129	7.94014	11.7905	10.7431	9.24858	11.6447	10.7946	15.1665	14.6492	12.6632
YDL067C	126.684	123.043	148.661	134.982	109.258	98.0652	44.7631	60.4266	56.2219	60.6661	33.4839	37.9895
YDL065C	97.106	56.7892	148.661	102.56	127.337	128.642	28.4856	46.5788	20.2399	60.4134	45.6915	26.3531
YDL063C	68.6439	77.612	76.9189	84.6948	92.7515	113.216	90.636	95.3607	90.4049	120.068	112.31	80.086
YDL061C	239.417	261.231	259.601	294.447	227.163	263.068	250.451	192.924	244.228	212.837	249.734	253.948
YDL059C	12.2778	5.67892	10.3545	14.5569	8.64633	8.53939	8.13875	9.12693	7.19641	8.34159	7.3246	6.16046
YDL055C	1491.19	1493.56	1579.8	1725.66	1536.69	1521.11	1438.34	1445.52	1399.7	1459.27	1249.37	1236.2
YDL054C	58.0404	30.2876	39.199	37.054	29.8691	38.2895	46.9828	46.2641	63.8681	48.0274	56.8528	57.1554
YDL053C	137.846	162.796	105.763	74.7696	107.686	108.533	50.6822	69.5535	54.8726	73.5577	66.2702	78.717
YDL052C	118.871	111.686	90.9714	72.7846	85.6773	96.6879	96.9251	80.5688	95.3524	95.8019	91.0343	91.7225
YDL049C	8.37121	17.0368	11.8337	10.5868	4.71618	11.0186	12.5781	12.2742	13.4933	10.8693	13.6028	10.2674
YDL048C	34.601	22.7157	33.2822	25.8054	30.6552	25.8936	28.8556	36.5077	23.3883	27.8053	29.6472	26.3531
YDL045C	31.8106	34.0735	48.8139	23.1587	41.6596	43.7988	43.2833	50.0408	31.9341	37.4108	34.5302	32.5136
YDL044C	55.25	22.7157	57.3193	40.3624	44.8037	61.9794	30.7053	36.5077	14.3928	46.0051	28.252	24.2996
YDL043C	36.2752	34.0735	62.4966	61.5361	56.5942	57.2965	27.3758	35.5636	16.6417	48.5329	21.9738	15.0589
YDL042C	58.5985	47.3244	52.1421	54.9193	40.8736	48.2062	42.5434	56.9647	52.6237	59.4023	47.0867	45.1767
YDL040C	278.482	255.552	316.551	289.153	303.408	368.02	301.504	287.656	287.407	302.32	302.401	299.467
YDL039C	12.8359	15.1438	11.0941	8.60181	11.7905	14.3241	14.0578	10.3858	11.2444	10.111	12.9052	7.52946
YDL036C	27.904	32.1806	38.4594	39.7007	40.8736	51.7873	34.0348	41.2286	26.9865	42.9718	36.623	28.7488
YDL035C	56.9242	34.0735	36.2406	24.4821	29.0831	39.1159	65.4799	84.3455	41.3794	114.255	107.427	82.824
YDL033C	29.0202	7.5719	14.0525	17.8653	11.7905	17.3542	30.7053	29.5839	29.6852	25.7831	25.4617	19.8504
YDL028C	44.0884	39.7525	62.4966	39.7007	55.8081	56.1947	57.3412	62.3149	39.1305	82.9104	69.7581	50.3105
YDL027C	39.6237	13.2508	36.9802	19.1887	22.7949	44.0743	48.8325	79.3099	45.8771	68.5022	51.2722	63.6581
YDL025C	40.7399	47.3244	59.1684	43.6708	55.0221	56.7456	89.1563	92.8429	64.3179	85.4381	58.5968	58.1822
YDL024C	1.67424	3.78595	2.58862	1.98503	2.35809	2.20371	7.7688	5.66499	8.54574	3.79163	4.53427	5.47597
YDL020C	140.078	85.1839	171.588	141.599	163.494	159.769	153.896	173.726	139.43	198.682	112.31	94.4604
YDL019C	152.914	119.257	150.14	105.207	139.127	144.619	177.203	181.28	125.038	200.451	192.532	194.739
YDL018C	69.7601	53.0033	58.4288	54.9193	60.5243	63.9077	40.3238	38.0813	42.2789	52.0718	36.623	44.15
YDL015C	257.833	204.441	252.945	261.363	244.455	245.163	215.307	214.955	215.443	204.748	187.649	169.071
YDL012C	102.687	117.364	128.691	116.455	165.066	125.887	47.7226	41.5433	38.6807	43.4774	42.9012	39.7008
YDL009C	0	0	0	0	0	0	0.369943	1.88833	0.449776	0.758327	1.74395	2.05349
YDL005C	80.3636	79.5049	107.612	103.883	114.76	118.45	75.0984	84.3455	51.2744	99.3408	61.0383	52.3639
YDL002C	46.8788	13.2508	68.4134	48.3025	62.0964	67.2132	26.266	26.7514	21.1395	38.4219	19.881	21.2194
YDR001C	333.174	230.943	444.502	344.734	366.29	390.333	355.515	377.037	322.039	365.008	270.661	316.922
YDR005C	62.505	51.1103	67.6738	68.1528	74.6729	60.8776	73.9886	81.1982	49.9251	83.6687	48.1331	42.4387
YDR006C	61.9469	62.4682	91.3412	66.8295	78.603	89.5258	135.399	130.61	107.946	141.807	95.9173	104.386
YDR008C	3.90656	1.89297	3.32822	0.661678	2.35809	0	3.69943	2.51777	3.5982	4.29718	1.39516	0.684496
YDR010C	0	0	0	0	0	0	0.369943	2.51777	0.899551	2.78053	1.04637	1.36899
YDR016C	16.1843	13.2508	21.0787	17.8653	21.2228	19.8334	14.0578	22.3453	24.7377	22.2442	13.9516	16.4279
YDR017C	74.7828	53.0033	102.065	77.4163	99.8258	107.431	127.63	124	87.7062	137.004	101.847	89.3267
YDR018C	17.8586	13.2508	9.61486	7.27846	6.28824	6.06021	11.8382	18.5686	14.8426	12.6388	9.76613	14.7167
YDR019C	160.727	81.3979	288.446	256.069	176.857	220.922	128.37	196.386	155.173	212.837	92.0806	112.6
YDR020C	26.2298	22.7157	40.6782	32.4222	36.9434	34.433	20.7168	26.4366	20.2399	20.222	14.998	15.0589
YDR022C	25.6717	20.8227	17.3807	19.8503	18.0787	19.8334	19.9769	18.2539	22.4888	22.2442	12.5565	15.4012
YDR026C	31.2525	20.8227	22.1881	23.8204	40.0875	34.433	55.1215	72.386	37.3314	72.2938	38.0181	29.7756
YDR027C	38.5076	35.9665	49.1837	41.6857	44.0177	43.7988	65.8499	85.6043	41.3794	98.5825	65.5726	62.2891
YDR028C	193.654	164.689	266.627	205.12	249.172	299.98	253.781	310.316	154.723	331.642	295.077	244.365
YDR030C	14.5101	18.9297	13.6827	16.542	11.7905	23.139	18.8671	27.3808	15.2924	31.0914	23.7177	18.8236
YDR032C	477.159	416.454	419.356	383.773	357.644	396.393	198.289	186.63	205.547	200.198	228.109	253.264
YDR034C	56.3661	39.7525	55.8401	43.0091	44.0177	55.6437	107.653	95.6754	71.0645	122.596	72.1996	65.0271
YDR036C	104.361	83.2909	78.7679	64.1828	55.8081	65.0095	71.0291	66.721	83.2085	67.7438	69.0605	72.2143
YDR038C	166.308	151.438	210.048	174.021	205.94	271.883	435.793	369.169	466.867	406.463	313.563	331.638
YDR042C	1.11616	1.89297	0.739604	0.661678	0	0.550928	1.47977	1.25889	0.899551	2.78053	3.4879	2.73798
YDR045C	42.9722	41.6454	51.7723	35.7306	50.3059	58.9493	22.1966	24.5483	26.087	32.3553	28.252	19.1659
YDR046C	195.328	136.294	330.233	254.746	256.246	270.506	307.423	388.996	363.868	362.227	215.901	219.723
YDR048C	0	0	0	0	0	0	0.739886	0	0.449776	0.758327	0	0
YDR050C	2537.59	3045.8	2333.82	2923.29	2606.48	2250.82	2721.67	2266	2808.4	2409.46	2602.32	2640.79
YDR051C	71.9924	66.2541	72.1114	56.9043	69.9567	66.9378	45.133	47.2083	39.5803	57.38	56.504	44.4922
YDR052C	63.6212	56.7892	82.0961	60.8744	65.2405	75.4772	86.5667	88.7516	51.2744	112.485	74.2923	60.5779
YDR054C	128.359	113.578	185.641	137.629	183.145	160.32	97.665	108.264	89.9551	104.144	93.4758	70.5031
YDR056C	87.6186	77.612	82.4659	76.093	80.1751	70.7943	48.8325	48.4672	44.9776	61.93	59.2944	37.305
YDR058C	16.1843	22.7157	24.0371	10.5868	22.0088	26.9955	13.6879	13.8478	16.1919	21.4859	12.9052	10.9519
YDR059C	66.9697	51.1103	90.6015	60.8744	58.9523	73.8244	33.6648	49.7261	42.2789	38.9274	34.879	37.6473
YDR066C	11.1616	3.78595	13.3129	15.8803	9.43236	20.6598	12.2081	11.9594	8.09596	10.111	8.37097	8.5562
YDR067C	34.0429	18.9297	38.0896	31.0989	31.4412	34.433	33.2949	34.3047	25.1874	41.2024	24.0665	23.6151
YDR069C	51.3434	28.3946	61.3872	38.3773	57.3802	51.7873	80.2776	88.1221	54.8726	108.946	70.1069	66.3961
YDR070C	13.3939	3.78595	9.24506	5.29342	8.64633	7.43753	2.21966	2.20305	1.34933	3.28608	1.39516	4.44922
YDR071C	185.283	164.689	233.345	254.084	268.036	274.087	125.041	152.325	149.775	164.051	121.03	115.68
YDR072C	103.803	81.3979	129.431	115.794	136.769	131.121	150.937	165.229	141.23	162.282	112.659	121.84
YDR078C	4.46464	3.78595	8.13565	3.97007	7.8603	12.9468	15.1677	13.8478	17.5412	15.6721	5.58065	7.18721
YDR079C-A	23.4394	20.8227	17.3807	14.5569	17.2927	17.6297	6.65897	11.6447	12.1439	13.9027	11.8589	11.9787
YDR081C	59.7146	39.7525	57.3193	54.2576	57.3802	57.0211	69.5493	71.1271	48.5758	91.252	73.246	56.8132
YDR084C	70.3182	73.826	54.7307	55.581	59.7383	58.1229	37.3642	53.8174	44.9776	48.2801	36.623	46.888
YDR085C	56.3661	20.8227	52.5119	37.054	44.0177	42.4215	75.4684	82.1424	53.0735	84.6798	80.2218	78.0325
YDR086C	184.725	179.833	149.4	146.231	143.057	159.769	94.3355	84.3455	97.6013	89.7353	128.704	135.188
YDR087C	98.7803	126.829	174.916	173.36	172.141	206.323	66.2198	72.7007	85.0076	86.702	56.1552	43.1232
YDR088C	46.8788	49.2173	56.2099	40.3624	48.7339	58.9493	12.948	25.1777	11.2444	28.8164	20.5786	12.6632
YDR090C	33.4848	26.5016	35.1312	27.1288	35.3714	37.7386	36.2544	38.3961	40.03	38.9274	28.6008	21.9039
YDR091C	334.848	268.802	381.636	362.6	374.936	411.268	331.469	302.133	340.03	368.041	298.216	269.349
YDR097C	86.5025	92.7558	126.842	101.898	111.616	122.306	100.994	118.65	72.4139	128.916	102.893	87.9577
YDR098C	262.856	289.625	252.945	262.686	265.678	305.214	124.301	140.366	146.177	145.851	144.399	163.595
YDR101C	187.515	172.261	285.487	264.671	274.324	323.67	228.255	247.686	251.425	282.35	181.72	140.664
YDR104C	13.952	7.5719	17.7505	17.8653	13.3625	20.3843	42.5434	43.7463	21.5892	45.4996	44.6452	36.6205
YDR105C	50.7853	28.3946	61.3872	68.8145	68.3846	61.704	66.5897	70.183	75.1125	71.7883	64.875	62.6314
YDR107C	19.5328	17.0368	24.4069	15.8803	16.5066	20.6598	28.4856	33.3605	31.0345	34.1247	26.1593	33.1981
YDR109C	17.8586	18.9297	32.5426	31.7605	33.0133	38.8404	54.7516	61.056	46.7767	57.6328	37.6694	36.2783
YDR111C	25.6717	34.0735	55.8401	51.6109	70.7427	77.13	70.2892	67.3505	87.7062	69.0077	30.3448	42.4387
YDR113C	42.4141	45.4314	82.0961	75.4313	67.5986	73.5489	40.3238	44.0611	33.2834	44.2357	24.0665	23.6151
YDR116C	176.912	119.257	156.057	129.027	129.695	138.834	71.7689	89.6957	82.7587	80.8882	80.5706	82.1395
YDR117C	85.9444	73.826	89.1223	72.1229	86.4633	98.3407	58.0811	67.6652	45.4273	74.5688	57.5504	65.7116
YDR120C	108.826	136.294	158.275	152.848	144.63	195.855	133.179	106.691	132.234	147.368	128.355	105.07
YDR123C	22.3232	15.1438	37.35	41.6857	36.1574	46.0025	44.7631	34.3047	40.03	37.6636	19.1835	12.6632
YDR125C	8.92929	3.78595	10.7243	9.26349	4.71618	10.4676	18.1272	23.9189	13.0435	27.2998	9.06855	13.6899
YDR129C	660.209	511.103	813.935	739.756	778.956	804.631	388.07	434.946	451.575	433.257	334.49	351.831
YDR130C	40.7399	30.2876	65.455	46.9791	58.1662	55.6437	38.1041	43.7463	22.039	42.4663	27.2056	24.2996
YDR131C	23.4394	15.1438	22.9277	17.8653	16.5066	22.0371	39.214	52.2438	29.2354	45.2468	35.2278	34.567
YDR132C	23.4394	9.46487	13.6827	13.2336	13.3625	11.5695	17.7573	22.66	16.6417	22.7498	16.7419	16.4279
YDR133C	6.69697	1.89297	4.43763	1.32336	2.35809	5.50928	438.752	373.26	295.503	383.966	165.675	158.461
YDR135C	264.53	217.692	285.857	205.12	220.874	260.314	446.521	459.494	408.396	469.657	453.427	445.949
YDR139C	45.2045	43.5384	37.35	32.4222	36.1574	55.3683	27.3758	24.863	18.4408	23.7609	31.0423	23.6151
YDR141C	91.5252	88.9698	146.811	106.53	146.202	155.913	255.261	295.524	223.089	296	215.901	233.755
YDR142C	20.0909	13.2508	17.7505	13.2336	15.7206	19.558	32.555	31.7869	35.0825	34.6302	28.6008	29.0911
YDR143C	87.0606	62.4682	99.4768	83.3714	92.7515	103.299	99.5147	100.711	113.343	86.9548	82.3145	94.4604
YDR144C	106.035	81.3979	66.9342	56.9043	67.5986	65.0095	98.4048	97.249	102.099	101.869	114.403	104.728
YDR146C	190.305	206.334	196.735	164.758	200.438	189.795	124.671	138.478	95.3524	127.399	144.748	139.637
YDR148C	396.795	318.02	463.362	391.713	373.364	397.77	166.104	240.762	213.643	210.562	179.278	214.589
YDR151C	69.202	49.2173	79.1377	74.7696	91.1795	88.6994	61.7805	55.0763	52.6237	60.6661	53.0161	46.888
YDR153C	143.427	149.545	213.376	176.006	195.721	226.156	107.283	99.4521	74.6627	105.407	84.0585	70.5031
YDR162C	48.553	43.5384	87.6431	68.1528	77.0309	85.9448	28.8556	33.3605	22.4888	40.6969	27.2056	21.5616
YDR164C	58.0404	41.6454	60.6476	46.3175	59.7383	70.2433	94.3355	79.3099	80.9596	100.352	70.8044	64.6849
YDR166C	73.6666	53.0033	116.118	105.868	88.8214	115.97	94.3355	111.097	61.6193	137.51	93.8246	81.7973
YDR169C	95.4318	64.3611	103.545	84.6948	113.974	112.94	88.0464	84.6602	69.7152	69.766	64.875	58.1822
YDR170C	341.545	302.876	436.367	298.417	410.308	452.588	546.036	605.21	447.077	608.936	663.748	616.046
YDR173C	26.2298	18.9297	26.6258	27.1288	28.2971	31.4029	28.4856	34.3047	18.4408	32.3553	23.0202	23.9574
YDR175C	139.52	85.1839	154.577	122.41	121.049	148.475	65.11	79.9393	66.117	78.6132	62.7823	71.8721
YDR179C	19.5328	13.2508	24.7768	25.8054	29.0831	27.2709	6.65897	15.4214	5.39731	18.9582	10.8125	9.92519
YDR181C	34.601	28.3946	45.8555	36.3923	46.3758	47.1044	36.2544	47.523	28.7856	52.3245	33.4839	25.6686
YDR185C	13.952	13.2508	14.0525	9.26349	12.5765	12.1204	7.39886	6.92388	10.7946	9.35269	8.02218	6.16046
YDR186C	85.3863	43.5384	87.2733	62.8594	80.1751	97.7898	161.295	180.65	118.291	183.768	149.631	131.765
YDR190C	274.018	257.445	329.864	312.974	332.491	351.217	200.509	201.107	179.91	235.587	169.861	154.012
YDR192C	55.25	54.8963	69.8926	66.1678	75.4589	75.4772	31.0752	35.5636	46.7767	35.8941	37.3206	35.2515
YDR194C	304.712	223.371	257.752	197.842	202.796	246.265	218.636	277.585	179.011	296.506	276.591	274.141
YDR196C	47.9949	41.6454	64.3456	54.2576	58.1662	61.704	43.6533	42.4874	35.0825	52.5773	21.625	34.9093
YDR198C	22.8813	9.46487	33.2822	22.4971	23.5809	37.4631	32.185	38.0813	27.4363	51.5662	34.5302	26.0108
YDR200C	38.5076	41.6454	32.9124	26.4671	43.2317	36.3613	53.6417	52.2438	25.6372	63.6994	53.0161	43.8077
YDR202C	27.904	26.5016	42.5273	39.7007	36.9434	41.5951	38.4741	48.4672	34.1829	55.6106	29.996	27.0376
YDR207C	54.1338	49.2173	42.1575	36.3923	55.0221	58.1229	64.3701	58.853	47.2264	66.9855	47.7843	46.5457
YDR215C	0	0	1.10941	0	1.57206	0	0.739886	0.944166	0.899551	0.758327	0.697581	0.342248
YDR217C	56.3661	35.9665	50.2931	42.3474	44.8037	52.0627	49.9423	71.4419	34.6327	88.2187	86.8488	54.4174
YDR218C	6.13889	3.78595	0.739604	1.32336	1.57206	3.30557	1.47977	3.14722	2.69865	2.0222	3.4879	3.42248
YDR219C	50.7853	37.8595	82.4659	64.8444	71.5287	86.2203	61.4105	64.8327	30.135	76.3382	41.8548	33.5403
YDR224C	493.901	501.638	739.974	658.37	820.615	691.415	560.834	599.86	530.735	479.515	337.28	333.35
YDR228C	78.1313	83.2909	72.1114	74.7696	101.398	93.9333	91.006	92.2135	52.6237	97.0658	59.9919	52.0217
YDR231C	61.3889	60.5752	86.1639	81.3864	64.4545	76.8545	54.7516	54.1322	43.1785	67.7438	43.25	41.412
YDR233C	695.368	696.615	523.64	510.815	524.282	546.521	493.874	464.529	470.915	438.313	516.558	573.608
YDR236C	36.2752	20.8227	34.7614	24.4821	53.45	31.4029	31.4452	40.5991	42.7287	38.9274	27.2056	29.4333
YDR238C	540.78	393.739	621.268	569.705	544.719	699.679	526.799	508.59	484.408	540.434	513.419	518.848
YDR239C	60.8308	56.7892	51.7723	39.039	33.0133	52.8891	48.8325	54.7616	41.8291	58.1384	50.9234	48.257
YDR240C	19.5328	15.1438	25.1466	31.7605	26.725	36.6367	29.5954	22.0305	20.2399	33.8719	26.8569	23.9574
YDR243C	35.7172	30.2876	50.6629	45.6558	50.3059	55.3683	39.5839	42.1727	31.9341	39.9385	26.1593	21.9039
YDR248C	47.4368	34.0735	46.5951	37.054	30.6552	46.8289	32.185	40.5991	23.8381	41.9607	42.2036	37.9895
YDR249C	7.25505	3.78595	9.98466	7.27846	7.07427	10.1922	22.5665	25.8072	33.2834	25.7831	15.6956	13.0054
YDR253C	1.67424	0	5.54703	3.30839	0.78603	1.65278	1.10983	3.77666	1.34933	2.27498	3.4879	1.71124
YDR255C	27.3459	15.1438	31.803	22.4971	25.939	24.5163	31.4452	38.3961	22.9386	42.7191	21.9738	30.4601
YDR256C	1.11616	1.89297	2.58862	1.98503	1.57206	1.10186	3.69943	4.72083	3.5982	6.06661	2.44153	2.39574
YDR257C	64.7373	39.7525	90.2317	76.7547	77.817	95.3106	84.717	95.046	68.8157	99.5936	53.0161	50.3105
YDR258C	511.202	437.277	882.718	676.897	723.148	697.475	444.672	511.108	399.85	543.467	309.726	337.799
YDR259C	19.5328	7.5719	8.87525	8.60181	10.2184	15.426	10.7283	18.8833	8.09596	12.8916	16.3931	19.1659
YDR260C	31.8106	24.6087	63.2362	49.6259	62.8824	62.5304	24.4162	21.4011	31.4843	25.2776	13.9516	15.0589
YDR261C	157.379	119.257	61.0174	53.5959	51.878	60.6021	110.983	104.173	90.4049	93.2742	161.141	147.509
YDR263C	11.1616	0	10.3545	7.94014	7.8603	10.7431	18.8671	21.4011	11.2444	18.1998	12.9052	13.0054
YDR264C	93.7575	94.6487	148.661	103.883	121.049	160.32	184.232	216.843	191.155	207.781	143.353	150.247
YDR266C	120.545	126.829	164.192	119.102	211.442	177.399	164.255	150.122	140.33	157.226	118.938	109.519
YDR267C	30.1364	24.6087	38.4594	43.0091	38.5155	48.7571	42.9134	38.7108	33.2834	59.4023	30.6935	23.6151
YDR271C	0.558081	1.89297	2.58862	0.661678	1.57206	1.65278	1.10983	1.57361	1.34933	2.78053	0.697581	0.342248
YDR274C	0	0	0	0	0	0	0	0	0	0	0	0
YDR276C	229.929	276.374	190.078	257.393	227.163	175.195	120.231	108.894	93.5533	118.299	113.706	130.054
YDR277C	51.3434	28.3946	97.258	85.3565	99.0398	84.0166	75.8383	87.8074	69.2654	72.5466	33.4839	32.8558
YDR281C	1.11616	0	0	0	0	0	1.10983	0	0	0.758327	0.34879	0.342248
YDR282C	13.952	13.2508	22.9277	15.2186	17.2927	22.8635	18.1272	28.0102	14.3928	28.0581	18.4859	20.8771
YDR283C	48.553	51.1103	69.153	64.1828	80.1751	90.0768	146.867	172.468	95.8022	197.67	153.468	119.787
YDR284C	143.985	106.007	101.696	84.6948	88.8214	100.544	93.2256	100.396	100.3	86.4492	102.196	134.161
YDR286C	20.649	15.1438	15.5317	16.542	15.7206	18.7316	10.7283	12.2742	12.1439	13.9027	14.6492	10.2674
YDR289C	67.5277	77.612	93.9298	74.7696	73.1008	96.137	45.133	50.6702	26.087	55.6106	42.9012	38.674
YDR292C	118.313	85.1839	110.201	113.147	110.044	122.031	97.295	98.8227	71.9641	123.354	95.9173	86.5887
YDR293C	247.788	200.655	330.973	234.896	304.194	307.142	484.625	554.855	402.099	491.901	328.909	348.408
YDR294C	186.957	141.973	190.448	153.509	157.992	184.01	177.203	184.112	182.159	180.229	173	187.894
YDR295C	35.1591	39.7525	57.3193	46.9791	56.5942	63.6322	51.4221	48.1524	31.4843	53.0829	49.877	45.1767
YDR298C	323.129	265.016	366.474	326.869	237.381	301.909	144.278	198.904	161.02	193.121	136.028	185.841
YDR300C	84.2702	96.5417	73.5906	51.6109	43.2317	88.6994	55.4915	67.0358	73.3134	70.2716	79.5242	73.2411
YDR303C	88.1767	68.1471	76.5491	76.093	82.5332	74.6508	98.0349	111.726	74.213	126.388	100.452	105.07
YDR304C	253.927	247.98	261.08	239.527	237.381	240.48	141.318	145.401	168.216	160.007	174.046	173.177
YDR305C	53.5757	39.7525	48.0743	44.3324	33.7993	43.7988	24.4162	28.325	27.4363	32.1025	28.9496	27.3798
YDR306C	39.0656	18.9297	40.3084	34.4073	40.8736	48.7571	53.6417	56.6499	44.078	59.655	36.623	44.15
YDR308C	42.9722	35.9665	60.6476	56.2426	58.9523	65.5605	35.5145	37.7666	24.2879	38.1691	20.5786	19.8504
YDR309C	150.124	153.331	296.212	267.98	312.054	296.675	201.249	200.163	168.666	170.118	89.9879	78.3748
YDR310C	95.4318	60.5752	86.9035	60.2127	88.0354	79.8846	137.989	122.427	80.0601	132.454	169.512	115.338
YDR313C	18.4167	3.78595	25.5164	21.8354	30.6552	26.1691	31.0752	39.3402	31.9341	37.158	26.1593	21.9039
YDR314C	8.37121	3.78595	11.8337	7.94014	6.28824	11.845	30.7053	41.2286	23.8381	43.4774	26.5081	19.1659
YDR315C	14.5101	11.3578	9.98466	6.61678	7.07427	11.5695	17.3873	24.863	9.44529	20.7276	19.5323	19.1659
YDR319C	21.7651	20.8227	32.5426	22.4971	24.3669	33.6066	35.8845	34.9341	37.3314	47.269	22.3226	19.1659
YDR320C	100.455	102.221	149.03	127.704	167.424	142.69	112.093	105.432	103.448	104.396	81.9657	68.7918
YDR320C-A	24.5555	17.0368	35.1312	24.4821	24.3669	31.9538	19.607	22.66	22.4888	28.3109	16.7419	23.6151
YDR322C-A	130.033	117.364	185.641	148.878	120.263	133.6	64.3701	79.3099	58.0211	77.3493	61.3871	56.8132
YDR323C	17.3005	13.2508	15.9015	9.92517	20.4368	17.0788	17.7573	12.9036	12.1439	20.4748	17.4395	13.6899
YDR324C	175.795	149.545	220.402	200.488	221.66	269.404	190.521	164.914	142.129	210.815	175.442	139.979
YDR326C	96.5479	64.3611	94.6694	72.7846	135.197	93.1069	173.503	174.356	106.147	190.087	184.859	160.857
YDR328C	157.379	159.01	236.673	217.03	209.084	235.797	129.11	124.945	134.483	138.268	109.869	124.921
YDR329C	53.5757	62.4682	69.5228	56.9043	44.8037	60.3266	61.0406	68.9241	42.7287	74.8216	54.4113	45.8612
YDR333C	80.9217	75.719	106.873	94.62	97.4677	111.287	95.4453	102.599	99.8502	118.046	83.7097	84.5353
YDR338C	27.904	17.0368	26.9956	17.8653	28.2971	21.4862	37.7342	53.188	34.1829	50.0496	36.623	35.2515
YDR339C	100.455	85.1839	109.831	126.381	128.909	117.899	72.1389	64.2033	66.5668	71.2827	56.504	43.4655
YDR341C	613.331	543.284	600.189	612.714	558.081	643.76	421.735	402.215	457.422	475.976	484.121	440.473
YDR342C	1319.3	1152.82	2282.42	2238.46	2538.88	1923.57	2645.09	2335.24	2162.07	2329.58	1171.24	1281.03
YDR343C	1284.14	1130.11	2233.61	2183.54	2496.43	1876.46	2555.57	2271.03	2102.7	2249.2	1126.59	1229.01
YDR345C	1298.65	1183.11	1157.85	1061.33	1197.12	1053.93	1127.59	1094.92	1172.56	1125.86	1223.56	1236.88
YDR346C	223.79	141.973	183.052	168.728	183.931	222.575	169.434	158.935	160.57	188.823	154.514	149.562
YDR348C	127.8	111.686	121.295	102.56	157.206	131.672	85.4568	86.5485	72.4139	96.5603	76.3851	73.2411
YDR349C	82.5959	75.719	77.2887	48.3025	77.0309	89.2504	228.995	213.067	242.879	191.098	155.56	171.466
YDR350C	21.7651	17.0368	31.803	29.1138	24.3669	38.2895	93.5956	121.483	77.3614	125.124	62.4335	53.3907
YDR357C	55.8081	32.1806	41.048	35.7306	33.0133	46.278	27.0058	40.9138	27.8861	37.6636	50.5746	47.5725
YDR359C	42.4141	30.2876	44.7461	28.4522	49.5199	46.278	113.203	107.635	80.9596	106.419	96.9637	93.4337
YDR361C	79.2474	75.719	121.665	142.922	115.546	150.128	79.9077	64.518	75.1125	99.5936	50.9234	42.4387
YDR362C	22.3232	28.3946	38.0896	32.4222	39.3015	41.3196	43.6533	41.858	28.3359	52.3245	35.5766	29.0911
YDR364C	19.5328	18.9297	34.0218	27.1288	34.5853	39.1159	64.74	79.3099	41.8291	78.1076	30.6935	28.7488
YDR365C	143.427	176.047	230.757	231.587	268.822	288.962	115.792	135.96	89.9551	158.743	102.196	63.6581
YDR366C	2.7904	1.89297	1.84901	0	3.14412	1.92825	215.677	231.006	189.356	212.837	147.538	116.364
YDR369C	36.8333	17.0368	24.7768	27.7905	37.7294	44.0743	33.6648	38.7108	20.2399	51.0607	34.5302	34.2248
YDR370C	25.1136	30.2876	20.7089	28.4522	25.153	25.3427	52.9019	58.2235	48.126	61.1717	25.8105	34.9093
YDR372C	141.752	106.007	159.755	136.306	139.913	163.626	106.544	112.356	96.7018	128.663	116.496	109.862
YDR375C	107.71	62.4682	52.1421	58.2277	49.5199	65.285	75.0984	97.8785	69.2654	80.3826	89.9879	99.2519
YDR378C	79.2474	73.826	55.4703	53.5959	55.8081	59.5002	39.214	32.7311	31.0345	36.9052	46.3891	43.1232
YDR379C-A	26.2298	24.6087	25.1466	16.542	25.153	25.3427	12.2081	18.8833	13.943	21.2331	11.8589	14.0322
YDR381C-A	44.0884	35.9665	47.7045	44.3324	46.3758	46.8289	24.7862	18.8833	15.7421	20.9804	17.7883	18.4814
YDR383C	15.6263	17.0368	22.9277	16.542	23.5809	25.3427	14.4278	16.6803	12.1439	21.2331	10.8125	10.6097
YDR384C	97.6641	81.3979	83.9451	142.261	202.796	183.459	156.116	61.6855	124.588	106.924	60.6895	55.4442
YDR387C	11.7197	3.78595	10.7243	10.5868	14.1485	15.426	52.5319	59.4824	49.0255	53.5884	43.25	32.8558
YDR390C	71.4343	47.3244	112.79	95.9433	82.5332	108.257	100.994	112.67	85.9071	119.31	98.3589	75.6368
YDR391C	60.8308	35.9665	93.9298	84.0331	85.6773	92.5559	90.636	101.97	89.9551	89.2298	35.9254	39.3585
YDR397C	55.25	35.9665	83.5753	60.8744	84.8912	77.9563	52.162	51.9291	52.174	56.1162	43.25	44.8345
YDR402C	1.67424	1.89297	0.739604	0.661678	0	1.10186	3.69943	5.03555	3.5982	4.54996	1.74395	1.71124
YDR404C	64.7373	56.7892	69.5228	47.6408	57.3802	71.6207	56.2313	61.3708	73.7632	63.1939	41.1573	43.1232
YDR407C	46.8788	49.2173	60.6476	35.0689	52.664	60.3266	156.486	162.396	105.697	151.918	120.333	107.124
YDR408C	87.0606	73.826	99.8466	81.3864	69.9567	87.8731	71.399	65.7769	73.7632	73.0521	57.2016	46.888
YDR410C	27.3459	20.8227	18.1203	21.8354	19.6508	19.558	24.7862	19.198	29.6852	28.8164	23.7177	27.0376
YDR411C	107.71	77.612	116.858	104.545	94.3236	122.582	122.451	102.599	124.588	116.277	68.0141	91.038
YDR414C	25.1136	17.0368	24.7768	15.2186	24.3669	17.9052	26.266	24.2336	25.1874	28.5636	29.2984	28.4066
YDR415C	51.9015	43.5384	65.0852	50.2875	63.6684	57.2965	38.4741	44.6905	47.6762	49.2912	31.0423	36.2783
YDR422C	63.0631	70.0401	68.0436	64.8444	73.1008	70.5188	98.4048	92.8429	76.0121	82.1521	91.0343	75.2946
YDR423C	43.5303	51.1103	73.2208	37.7156	62.8824	62.2549	60.3007	63.5738	56.6717	51.0607	41.8548	42.781
YDR424C	66.9697	41.6454	56.9495	47.6408	47.9478	44.3497	16.6474	18.2539	18.8906	21.2331	27.9032	26.3531
YDR426C	0	0	0.369802	0	0	0.275464	0.369943	0	0.899551	0.758327	0	1.02674
YDR428C	54.6919	58.6822	31.0634	29.1138	31.4412	33.0557	24.7862	24.863	21.5892	25.7831	42.9012	43.4655
YDR429C	325.919	261.231	469.279	449.941	444.107	484.266	260.07	266.255	254.123	285.384	218.343	201.242
YDR430C	179.144	107.9	179.724	117.779	147.774	168.309	185.711	186.001	156.072	206.518	167.419	197.477
YDR435C	34.0429	30.2876	32.9124	28.4522	29.0831	39.6668	38.4741	39.655	39.1305	49.544	33.8327	39.3585
YDR441C	61.9469	43.5384	40.3084	23.8204	26.725	25.6182	38.1041	33.3605	29.6852	29.5747	43.9476	40.3853
YDR443C	42.4141	17.0368	26.6258	35.0689	39.3015	29.1992	110.983	129.351	82.7587	120.321	121.379	110.204
YDR445C	6.69697	30.2876	8.50545	3.97007	18.0787	8.26392	496.094	429.595	556.372	346.05	623.288	689.63
YDR447C	792.474	1020.31	904.536	1149.33	1034.42	907.654	1112.42	1067.85	1239.58	1131.17	1101.48	1031.19
YDR449C	70.8762	79.5049	120.186	103.222	113.188	133.049	77.3181	67.6652	63.8681	101.11	61.0383	44.4922
YDR451C	101.571	90.8628	166.411	143.584	138.341	161.422	90.636	98.5079	105.247	92.5158	50.2258	47.2302
YDR453C	10.6035	7.5719	9.61486	12.5719	19.6508	19.558	15.5376	20.1422	19.7901	13.6499	10.1149	12.3209
YDR454C	337.639	321.806	232.606	216.369	216.158	272.709	158.706	127.462	156.972	145.093	228.806	235.467
YDR458C	83.7121	41.6454	110.201	82.7098	95.1096	119.827	71.0291	82.7718	52.6237	90.4936	59.6431	54.4174
YDR459C	6.13889	3.78595	7.39604	6.61678	4.71618	9.36578	44.3932	54.7616	45.4273	50.5551	21.9738	25.6686
YDR461C-A	21.2071	5.67892	22.1881	11.9102	20.4368	15.1505	6.65897	5.35027	8.09596	6.57216	7.3246	8.89845
YDR465C	80.3636	83.2909	123.514	107.192	102.97	161.422	84.717	86.5485	87.2565	94.5381	72.5484	54.0752
YDR468C	59.1565	43.5384	79.5075	62.1977	77.0309	77.6809	31.0752	34.6194	35.982	40.4441	37.3206	36.6205
YDR470C	68.0858	47.3244	69.8926	48.3025	58.1662	58.1229	39.9538	44.6905	50.8246	50.0496	45.6915	53.3907
YDR473C	32.3687	28.3946	47.3347	33.7456	70.7427	52.0627	21.4567	35.5636	19.3404	38.6747	21.9738	17.7969
YDR475C	32.9268	39.7525	37.7198	33.0839	47.1618	37.7386	66.5897	67.6652	44.9776	71.2827	65.9214	74.9523
YDR476C	70.3182	32.1806	69.8926	61.5361	68.3846	71.8961	58.8209	56.3352	76.4618	50.5551	48.1331	46.888
YDR479C	31.2525	37.8595	46.9649	41.6857	38.5155	42.146	63.2603	70.4977	80.9596	58.6439	38.3669	47.9147
YDR481C	134.497	85.1839	102.435	97.9284	91.9655	93.6578	110.983	125.259	135.382	131.191	154.165	154.012
YDR482C	15.0682	7.5719	14.0525	17.2036	14.9346	17.3542	7.7688	11.6447	5.84708	9.85825	11.1613	8.5562
YDR485C	56.9242	45.4314	78.0283	69.4762	66.8126	65.8359	55.4915	64.2033	26.9865	74.316	48.1331	38.674
YDR486C	115.523	113.578	93.56	93.2966	106.114	111.838	43.6533	49.4113	45.4273	59.655	49.5282	56.4709
YDR487C	269.553	225.264	201.542	207.767	209.87	221.473	120.971	115.818	120.09	121.838	183.115	172.493
YDR488C	7.81313	20.8227	17.7505	15.8803	17.2927	18.1806	21.4567	18.5686	24.7377	24.0137	22.3226	31.1446
YDR490C	74.7828	41.6454	66.5644	52.9342	58.1662	53.1646	90.2661	80.5688	81.8592	77.6021	72.8972	79.4015
YDR495C	26.2298	17.0368	46.2253	34.4073	40.8736	48.4817	44.3932	53.188	25.6372	76.591	39.4133	41.7543
YDR496C	221.558	232.836	352.422	322.237	351.355	415.951	204.578	216.529	193.853	258.589	171.954	133.819
YDR497C	526.828	427.812	564.688	486.995	511.706	619.519	1230.43	1130.48	1324.59	1150.89	875.464	975.407
YDR498C	36.8333	39.7525	50.6629	39.039	45.5897	52.3382	41.4336	45.6347	40.4798	43.9829	26.5081	28.0643
YDR500C	534.641	681.471	443.763	473.761	496.771	463.331	576.371	520.235	568.067	494.935	616.313	604.41
YDR502C	905.765	912.414	869.775	850.918	852.057	828.045	615.585	592.936	618.891	606.156	657.819	594.827
YDR503C	34.601	18.9297	23.2975	31.7605	26.725	27.5464	36.6244	23.6041	35.0825	25.7831	26.8569	22.9306
YDR504C	0	0	0.369802	0	0	0.275464	11.4682	15.4214	15.7421	21.7387	20.9274	19.1659
YDR505C	162.96	107.9	184.901	133.659	183.931	168.033	176.833	231.006	124.588	218.651	179.627	197.135
YDR506C	21.2071	26.5016	22.9277	15.2186	18.0787	19.8334	20.3469	23.9189	20.2399	22.7498	20.2298	21.2194
YDR507C	204.257	147.652	261.82	245.483	268.036	272.985	194.96	213.067	131.334	239.126	171.256	154.354
YDR508C	599.937	458.1	713.718	674.912	663.409	692.241	700.672	693.017	679.161	713.838	573.76	577.372
YDR510C-A	0	0	0	0	0	0	0	0	0	0	0	0
YDR512C	39.6237	64.3611	36.9802	30.4372	49.5199	38.8404	15.1677	17.9391	19.3404	24.2665	29.996	29.0911
YDR514C	44.6464	26.5016	55.4703	33.7456	65.2405	57.0211	37.3642	30.528	40.03	47.5218	30.3448	29.4333
YDR516C	256.159	202.548	194.146	212.399	231.879	226.431	155.376	135.016	143.928	145.851	123.123	152.985
YDR520C	21.2071	17.0368	21.0787	12.5719	21.2228	19.2825	27.7457	34.6194	30.5847	32.608	31.0423	22.9306
YDR522C	0	0	0.369802	0	0	0.550928	0.739886	0.629444	2.24888	2.52776	1.74395	0.684496
YDR523C	3.34848	1.89297	0.739604	1.98503	0	3.30557	4.06937	2.51777	2.24888	3.28608	4.18548	3.42248
YDR524C	39.6237	18.9297	28.8446	27.1288	22.7949	38.2895	70.6591	67.0358	53.9731	82.9104	80.5706	68.4496
YDR524C-B	724.947	1027.89	660.467	925.026	793.104	596.931	713.25	657.139	638.681	655.953	662.353	688.603
YDR524C-A	0	0	0	0	0	0	0.369943	0.944166	0	0.758327	0.34879	0.684496
YDR529C	283.505	261.231	385.334	373.848	349.783	300.256	206.058	275.696	205.098	249.489	198.462	188.579
YDR530C	21.2071	18.9297	26.6258	25.8054	22.0088	24.5163	42.1735	65.4621	48.126	54.5995	19.881	23.6151
YDR532C	22.3232	18.9297	32.1728	28.4522	30.6552	40.2178	21.0868	35.8783	13.0435	35.3886	19.881	14.3744
YDR533C	295.783	202.548	191.188	127.042	97.4677	117.623	70.6591	122.742	62.069	85.9437	136.726	183.787
YDR534C	0.558081	0	0	0	0	0	28.1157	42.8022	18.8906	30.3331	15.6956	16.0857
YDR535C	0	0	0	0.661678	0.78603	1.10186	4.06937	9.12693	5.39731	7.33049	1.39516	3.42248
YDR540C	17.3005	15.1438	5.17723	3.97007	2.35809	2.75464	2.5896	3.14722	2.24888	4.04441	9.76613	7.18721
YDR541C	15.0682	5.67892	7.02624	3.30839	9.43236	8.81485	25.896	34.6194	22.4888	33.3664	23.369	24.6419
YDL248W	198.119	147.652	211.897	174.683	215.372	212.658	258.96	262.163	244.678	283.614	193.23	218.354
YDL244W	27.904	13.2508	15.1619	13.8952	16.5066	21.2107	21.8266	22.3453	24.2879	24.2665	19.1835	23.6151
YDL242W	0	0	0	0.661678	0.78603	0.275464	2.21966	1.25889	0.449776	2.0222	1.39516	0.342248
YDL241W	49.6692	58.6822	18.8599	21.8354	25.939	26.1691	7.7688	5.66499	9.44529	4.80274	6.27823	13.6899
YDL240W	29.0202	26.5016	28.8446	30.4372	28.2971	33.3312	63.6302	73.6449	46.7767	68.7549	56.1552	61.9469
YDL237W	104.361	64.3611	76.5491	56.2426	65.2405	82.3638	91.006	93.4724	103.448	86.9548	96.9637	106.439
YDL236W	200.909	128.722	192.297	188.578	172.141	200.813	105.434	100.082	119.191	107.935	101.498	101.305
YDL233W	34.0429	45.4314	57.3193	39.039	45.5897	55.0928	44.7631	49.7261	45.4273	47.7746	32.4375	41.0698
YDL232W	15.6263	1.89297	12.9431	11.9102	11.0044	13.4977	17.3873	16.6803	14.3928	12.386	12.2077	14.7167
YDL230W	35.7172	28.3946	22.1881	23.8204	20.4368	22.3126	25.5261	27.6955	24.2879	20.7276	34.879	35.2515
YDL229W	3576.18	4056.65	2898.14	3287.22	3108.75	2726.27	4284.68	3932.76	4593.11	3631.12	5096.18	4572.43
YDL225W	154.03	141.973	167.52	165.42	158.778	187.591	75.8383	96.3049	70.165	116.53	86.1512	70.1608
YDL221W	0	0	0	0	0	0	1.84972	0.629444	0.899551	0.758327	0.697581	0.342248
YDL219W	64.7373	88.9698	70.2624	62.8594	73.1008	69.9679	21.0868	31.7869	26.9865	34.3775	48.8306	36.2783
YDL218W	3.90656	1.89297	2.58862	3.97007	0	2.47918	2.21966	3.46194	4.04798	3.79163	3.13911	6.84496
YDL212W	202.025	206.334	186.75	165.42	168.21	181.255	129.48	144.772	133.134	136.499	146.143	156.407
YDL210W	4.46464	0	2.95842	1.32336	0.78603	1.10186	2.95954	8.18277	5.39731	4.54996	6.27823	5.81822
YDL208W	186.957	200.655	259.601	256.731	240.525	287.585	162.775	158.935	163.269	193.121	127.308	127.658
YDL207W	47.9949	45.4314	31.0634	32.4222	40.0875	44.9006	58.0811	58.5383	30.135	62.9411	53.3649	45.519
YDL206W	10.0455	0	9.61486	6.61678	7.8603	9.64124	56.6013	61.3708	42.7287	76.8438	38.3669	47.9147
YDL204W	69.202	24.6087	173.067	152.186	180.001	168.584	134.289	122.742	102.099	125.124	30.3448	49.626
YDL202W	133.939	117.364	117.967	91.9732	114.76	118.45	67.6996	79.3099	59.8202	77.6021	68.7117	59.8934
YDL201W	93.7575	119.257	105.394	94.62	86.4633	105.227	41.4336	54.4469	53.9731	61.4245	47.7843	45.8612
YDL195W	739.457	634.147	545.089	482.363	620.964	602.991	625.944	600.489	526.237	538.412	678.397	738.229
YDL194W	6.69697	3.78595	8.50545	9.26349	7.07427	11.294	30.7053	32.1016	34.6327	33.3664	28.9496	23.9574
YDL193W	92.0833	54.8963	90.6015	82.0481	110.044	102.197	58.0811	62.0002	68.8157	64.205	48.4819	49.626
YDL192W	620.028	649.29	538.062	576.322	538.431	527.238	468.718	502.296	492.504	491.143	581.782	584.56
YDL191W	829.866	1272.08	842.04	1100.37	903.935	875.7	839.031	789.952	950.826	986.33	1019.17	1065.42
YDL189W	52.4596	43.5384	54.3609	42.3474	57.3802	50.4099	68.8094	68.9241	42.2789	69.2605	63.131	49.2837
YDL185W	1991.23	2053.88	1869.72	1868.58	1880.18	1899.33	1582.99	1578.33	1760.87	1642.54	1995.43	1956.63
YDL182W	438.651	389.953	433.038	447.956	458.256	437.437	337.758	280.102	344.978	345.544	308.331	279.617
YDL181W	112.174	106.007	140.155	116.455	84.1052	93.6578	31.8151	51.2997	35.982	42.9718	29.996	36.6205
YDL180W	30.6944	11.3578	19.5995	15.8803	24.3669	19.2825	40.3238	48.4672	44.9776	49.0385	39.4133	48.9415
YDL179W	68.0858	58.6822	78.7679	73.4463	84.8912	86.7712	74.3585	76.4774	56.6717	71.5355	43.9476	48.9415
YDL178W	171.889	147.652	173.807	154.833	130.481	164.177	118.012	133.127	128.186	148.632	114.054	151.274
YDL176W	13.952	5.67892	19.2297	23.1587	22.0088	26.9955	66.5897	63.8885	51.2744	73.3049	38.7157	35.936
YDL173W	143.985	124.936	220.402	195.857	203.582	218.443	119.492	147.605	120.54	161.776	85.4536	100.279
YDL170W	21.2071	28.3946	31.803	28.4522	33.0133	41.3196	63.2603	67.6652	56.2219	61.6772	46.7379	41.412
YDL168W	287.411	244.194	319.139	280.551	219.302	287.309	111.353	144.772	153.373	152.929	106.73	144.771
YDL165W	58.0404	83.2909	78.7679	72.1229	77.817	73.8244	43.6533	40.5991	39.5803	49.544	34.5302	40.7275
YDL161W	121.662	113.578	174.547	144.246	207.512	184.285	91.3759	91.2693	53.0735	111.98	83.3609	64.3426
YDL159W	39.0656	22.7157	41.7877	39.7007	41.6596	40.7687	35.1446	45.9494	44.078	47.0163	34.1815	29.0911
YDL156W	15.6263	13.2508	24.4069	17.8653	35.3714	26.4446	27.3758	23.9189	22.4888	25.5303	26.1593	18.1391
YDL155W	40.1818	43.5384	57.3193	53.5959	40.8736	56.7456	60.6707	62.3149	50.8246	70.5244	47.7843	46.888
YDL154W	2.7904	0	2.58862	2.64671	3.14412	4.40743	43.6533	37.7666	29.2354	44.994	16.3931	13.6899
YDL150W	70.3182	71.933	109.461	99.9134	95.1096	122.031	69.1793	64.2033	52.174	61.93	66.2702	59.8934
YDL149W	33.4848	20.8227	31.803	29.1138	24.3669	25.6182	30.7053	39.9697	28.3359	34.883	37.6694	35.2515
YDL147W	314.757	295.304	505.52	405.609	455.111	453.414	216.047	250.833	149.775	320.267	200.206	191.317
YDL146W	11.7197	13.2508	11.0941	7.94014	9.43236	9.09032	17.3873	23.6041	16.1919	21.9915	27.2056	30.4601
YDL143W	387.866	344.521	425.273	410.24	382.797	487.571	324.81	300.245	320.69	329.872	303.448	288.515
YDL141W	75.899	53.0033	77.6585	56.9043	62.0964	76.0281	101.734	96.3049	103.898	102.374	91.7319	100.963
YDL138W	11.7197	13.2508	7.02624	5.9551	8.64633	9.09032	60.6707	50.9849	48.126	60.6661	38.7157	53.3907
YDL137W	380.053	329.378	291.404	290.477	249.172	299.98	234.544	240.447	228.936	221.179	305.192	343.959
YDL136W	790.8	1220.97	815.784	1063.98	882.712	857.52	824.603	772.957	924.739	960.041	996.843	1039.75
YDL133W	17.8586	26.5016	40.6782	23.1587	38.5155	41.8705	57.7111	76.4774	43.6282	65.2161	32.0887	36.6205
YDL132W	145.659	134.401	190.818	155.494	139.913	166.38	149.457	162.082	106.597	180.229	143.004	132.45
YDL131W	529.06	528.14	528.447	576.983	579.304	564.15	389.18	344.62	416.942	422.641	401.806	361.414
YDL130W-A	115.523	109.793	138.306	115.132	125.765	128.642	47.7226	54.1322	34.6327	58.1384	41.1573	51.3372
YDL130W	726.621	893.484	634.95	852.241	665.767	676.264	649.25	546.987	670.615	625.114	723.042	734.464
YDL129W	3.34848	5.67892	4.43763	2.64671	5.50221	6.06021	4.43932	4.72083	5.84708	4.29718	5.58065	4.10698
YDL128W	237.742	213.906	212.636	192.548	218.516	193.651	157.226	171.209	176.762	158.743	163.931	175.573
YDL127W	20.0909	22.7157	34.0218	31.7605	35.3714	34.7085	25.896	26.1219	38.6807	24.5192	19.881	18.1391
YDL124W	620.586	395.632	623.856	578.307	652.405	631.639	489.805	451.626	496.102	419.355	349.837	461.008
YDL123W	27.3459	17.0368	28.4748	26.4671	37.7294	35.8103	31.4452	24.5483	32.8336	21.2331	13.9516	19.5081
YDL122W	150.124	96.5417	177.505	154.833	180.787	203.293	181.272	205.199	127.736	231.542	169.861	142.717
YDL120W	85.9444	75.719	91.3412	82.0481	85.6773	93.3823	56.9712	56.9647	53.9731	51.3134	57.8992	49.626
YDL117W	69.7601	53.0033	85.0545	74.7696	84.8912	88.6994	101.734	104.802	80.9596	125.629	98.3589	97.8829
YDL116W	92.6414	71.933	106.503	100.575	78.603	101.922	109.133	124.63	92.204	133.213	97.3125	86.931
YDL114W	1.11616	1.89297	0.369802	0	0	0.826392	0.739886	0.944166	0	1.0111	0	1.71124
YDL112W	113.848	81.3979	172.698	164.758	163.494	212.658	204.578	216.214	187.107	254.039	226.714	171.808
YDL108W	31.8106	13.2508	42.8971	31.0989	43.2317	43.5233	42.9134	50.6702	38.2309	41.4552	28.9496	27.7221
YDL107W	35.1591	22.7157	44.7461	33.0839	25.153	39.1159	26.266	33.99	19.7901	34.6302	22.6714	21.9039
YDL105W	8.92929	11.3578	23.6673	19.1887	19.6508	24.5163	24.0463	22.0305	17.5412	24.772	15.6956	11.6364
YDL102W	82.5959	68.1471	103.175	114.47	92.7515	127.54	71.7689	90.9546	96.252	109.199	93.4758	92.407
YDL099W	97.106	77.612	127.212	113.809	133.625	134.151	38.844	53.5027	26.087	62.1828	54.7601	43.8077
YDL095W	422.467	369.13	322.837	267.98	291.617	341.3	436.903	423.93	417.392	420.366	537.137	578.741
YDL093W	47.4368	41.6454	39.9386	32.4222	55.8081	41.5951	59.9308	72.386	60.7197	82.6576	62.0847	60.2356
YDL092W	75.899	87.0768	123.514	134.321	114.76	128.366	47.3527	49.0966	46.7767	72.7994	46.0403	40.3853
YDL089W	39.6237	20.8227	27.3654	19.1887	22.7949	27.2709	35.1446	38.3961	28.3359	40.4441	35.5766	44.4922
YDL086W	249.462	234.729	328.754	283.86	347.425	288.411	254.151	216.529	247.826	211.573	211.367	214.247
YDL085W	10.0455	0	3.32822	5.29342	3.93015	4.68289	3.69943	7.86805	1.34933	4.29718	2.79032	9.2407
YDL084W	671.929	630.361	636.43	701.379	636.684	639.077	507.192	529.362	515.893	574.812	607.244	585.586
YDL082W	963.805	1152.82	851.655	883.34	938.52	753.67	912.649	895.069	903.599	731.28	1034.16	750.892
YDL075W	798.055	1014.63	740.344	942.891	821.401	649.82	733.227	656.51	613.494	742.907	855.583	731.726
YDL073W	20.649	7.5719	20.3391	18.527	15.7206	23.4144	91.7459	107.32	46.7767	115.013	76.0363	59.8934
YDL070W	104.361	68.1471	103.545	76.7547	98.2538	111.838	91.3759	128.092	80.9596	115.771	144.748	137.926
YDL068W	0	0	0.739604	1.32336	0.78603	0.550928	0	0	0.899551	0.252776	0.34879	1.02674
YDL066W	375.03	338.843	257.752	217.692	218.516	223.952	188.671	208.661	173.164	194.637	358.905	359.36
YDL064W	78.1313	90.8628	89.4921	99.9134	107.686	101.095	40.3238	55.7058	56.2219	56.1162	48.1331	48.257
YDL060W	146.217	113.578	157.906	153.509	165.852	190.346	163.515	145.716	134.483	181.998	137.075	116.022
YDL058W	78.6894	30.2876	86.5337	56.9043	63.6684	89.2504	81.3875	102.599	62.9686	140.543	157.653	106.439
YDL057W	29.0202	34.0735	22.5579	19.8503	19.6508	28.9237	16.2775	28.0102	20.2399	23.0026	17.7883	24.9841
YDL056W	50.7853	51.1103	62.1268	48.9642	72.3148	68.866	79.1678	86.5485	47.6762	103.132	67.6653	52.0217
YDL051W	228.255	185.512	228.168	234.896	215.372	242.408	154.266	160.193	156.522	201.968	160.792	159.488
YDL046W	197.561	153.331	170.849	134.982	152.49	172.991	105.064	103.858	124.588	96.5603	105.335	141.348
YDL045W-A	56.9242	54.8963	74.7001	62.1977	56.5942	80.4355	31.0752	42.8022	37.7811	40.4441	30.6935	32.1713
YDL041W	0.558081	0	0	0	0	0	0.739886	0.314722	0.899551	0.252776	0.34879	0
YDL032W	0	0	0	0	0	0	0.369943	1.57361	0.449776	1.26388	0	0
YDL031W	177.47	141.973	163.453	155.494	208.298	235.246	141.688	135.016	122.789	176.437	163.583	141.006
YDL030W	22.3232	15.1438	28.4748	32.4222	36.9434	39.1159	27.0058	27.6955	22.4888	30.0803	20.5786	27.0376
YDL029W	300.247	240.408	373.87	308.342	307.338	368.846	273.018	264.681	288.756	299.539	205.438	231.017
YDL025W-A	0	0	0	0	0	0	0	0	0	0	0	0.342248
YDL022W	993.941	914.307	1322.78	1188.37	976.249	957.513	576.371	827.404	594.154	687.549	460.752	595.854
YDL021W	64.7373	43.5384	36.9802	34.4073	46.3758	44.0743	27.7457	25.4925	23.3883	22.2442	34.5302	33.8826
YDL017W	29.0202	24.6087	45.4857	33.7456	40.8736	48.2062	22.5665	31.1575	25.1874	38.6747	23.0202	24.9841
YDL014W	636.77	736.367	888.635	887.31	888.214	959.992	502.753	474.601	519.491	404.441	389.948	355.938
YDL013W	38.5076	37.8595	40.3084	19.1887	28.2971	29.7501	47.3527	37.7666	31.4843	40.4441	34.1815	37.9895
YDL010W	67.5277	68.1471	86.9035	72.7846	66.8126	84.0166	45.8729	42.4874	27.8861	52.5773	32.4375	27.3798
YDL008W	26.2298	34.0735	55.8401	46.9791	32.2272	51.7873	28.1157	34.6194	37.3314	33.1136	21.625	26.0108
YDL007W	297.457	251.766	343.916	318.267	336.421	350.115	155.376	188.518	156.072	213.848	164.28	163.252
YDL006W	39.0656	13.2508	47.3347	35.7306	41.6596	50.1345	23.3064	27.6955	20.6897	33.6191	27.2056	22.5884
YDL004W	277.924	270.695	298.8	288.492	243.669	260.314	130.59	206.143	165.967	197.67	162.536	151.274
YDL003W	77.5732	70.0401	101.696	84.0331	89.6074	89.2504	75.8383	79.9393	45.4273	102.121	60.3407	54.0752
YDL001W	34.601	30.2876	71.002	46.3175	54.2361	59.7757	39.5839	41.858	33.2834	51.0607	27.9032	32.1713
YDR002W	546.361	569.785	581.329	565.735	541.575	597.206	279.677	292.691	275.263	321.025	381.228	390.163
YDR003W-A	0	0	0	0	0	0	5.54915	3.14722	4.94753	4.54996	1.39516	1.36899
YDR004W	10.0455	15.1438	15.9015	15.2186	14.9346	17.6297	52.5319	43.1169	34.6327	62.6883	26.8569	24.6419
YDR007W	3.34848	3.78595	11.4639	12.5719	15.7206	13.7732	33.6648	41.2286	30.5847	38.4219	10.1149	11.2942
YDR009W	7.81313	5.67892	12.2035	7.94014	14.9346	12.9468	16.6474	14.4772	14.8426	20.9804	10.4637	15.7434
YDR011W	162.401	124.936	230.387	189.24	222.447	207.975	378.082	429.595	315.742	435.532	297.867	284.408
YDR012W	2638.6	3225.63	2513.92	3258.76	2747.18	2431.52	2891.1	2616.91	3072.87	2423.86	2702.43	2714.37
YDR013W	20.0909	26.5016	33.2822	26.4671	28.2971	30.3011	28.4856	30.528	23.8381	33.1136	22.3226	18.8236
YDR014W	19.5328	13.2508	24.4069	29.1138	24.3669	27.2709	25.896	37.1372	19.3404	47.5218	27.5544	19.8504
YDR014W-A	5.02273	3.78595	0.739604	0.661678	1.57206	1.37732	2.95954	0.629444	0.449776	1.51665	2.44153	3.42248
YDR021W	31.2525	30.2876	32.5426	44.9941	28.2971	48.7571	24.4162	22.66	21.1395	31.8497	21.2762	14.7167
YDR023W	842.144	764.762	940.037	1028.91	931.446	1059.99	680.325	603.636	588.756	760.602	563.296	553.757
YDR024W	0	0	0.739604	0.661678	0	1.10186	1.47977	1.57361	2.24888	1.76943	1.39516	0
YDR025W	1202.11	1556.03	1151.19	1522.52	1309.53	1196.07	1440.56	1149.99	1378.56	1187.03	1221.11	1267.34
YDR031W	47.4368	30.2876	85.7941	60.8744	60.5243	72.4471	25.5261	33.6752	24.7377	30.3331	19.5323	18.8236
YDR033W	1404.69	1455.7	1134.92	1168.52	1094.94	1100.2	1282.22	1235.6	1286.81	1186.53	1478.52	1617.46
YDR034W-B	30.6944	18.9297	46.2253	34.4073	36.9434	36.9122	6.65897	14.7919	11.2444	11.8805	5.58065	8.21395
YDR035W	415.212	414.562	412.699	352.013	403.233	423.939	247.122	201.737	223.089	244.939	263.337	243.681
YDR037W	1145.18	1213.4	1376.03	1392.83	1333.89	1368.23	880.094	901.363	939.131	914.289	926.038	791.62
YDR041W	127.242	87.0768	96.1486	85.3565	72.3148	101.095	71.7689	73.0155	62.9686	87.9659	60.6895	93.4337
YDR044W	95.4318	83.2909	66.1946	74.1079	82.5332	87.8731	59.9308	40.2844	49.4753	38.6747	59.2944	75.2946
YDR047W	108.826	75.719	117.967	95.2816	99.8258	132.774	114.312	123.056	114.693	130.938	78.129	76.6635
YDR049W	61.9469	66.2541	69.5228	64.1828	74.6729	79.0582	56.6013	65.7769	44.078	67.4911	43.25	37.9895
YDR055W	1068.72	774.227	1168.58	1010.38	940.878	1017.84	780.58	994.836	877.512	849.326	572.365	754.999
YDR057W	48.553	32.1806	46.2253	42.3474	32.2272	46.8289	37.3642	34.3047	19.7901	49.2912	40.8085	28.0643
YDR060W	218.209	183.619	313.962	261.363	310.482	390.333	332.579	340.844	213.643	401.408	303.448	220.75
YDR061W	71.9924	62.4682	82.0961	51.6109	67.5986	87.0467	56.6013	79.3099	65.2175	74.5688	73.246	74.6101
YDR062W	203.699	179.833	207.459	164.758	204.368	206.874	189.411	219.361	177.212	215.87	209.623	201.242
YDR063W	72.5505	54.8963	58.4288	54.2576	77.817	69.9679	33.2949	32.7311	31.9341	29.0692	31.7399	36.9628
YDR064W	1092.16	1448.13	1034.34	1232.04	1247.43	1036.02	1169.39	1124.19	1280.06	1002	1227.39	1265.63
YDR065W	12.8359	9.46487	15.5317	13.2336	14.9346	19.007	15.1677	22.66	13.943	26.2887	13.6028	16.0857
YDR068W	59.1565	45.4314	78.7679	72.1229	70.7427	83.7411	21.4567	33.99	12.5937	57.8856	31.3911	20.5349
YDR073W	34.0429	20.8227	36.2406	23.1587	33.7993	31.9538	40.6937	53.5027	33.2834	57.8856	27.5544	32.8558
YDR074W	433.629	310.448	606.106	533.313	573.016	537.43	598.198	573.108	501.5	595.792	320.538	427.468
YDR075W	20.649	18.9297	28.105	25.8054	22.7949	35.5349	23.3064	28.6397	25.1874	27.2998	16.7419	16.7702
YDR076W	6.13889	5.67892	17.3807	13.2336	15.7206	20.6598	22.1966	21.0864	17.991	28.3109	11.5101	11.6364
YDR077W	6406.76	8817.48	7207.08	9292.61	9813.59	6811.95	11270.7	10232.6	11177.4	7683.37	7581.31	8283.77
YDR079W	51.9015	39.7525	45.8555	43.0091	54.2361	48.7571	12.948	16.0508	12.1439	18.7054	13.9516	18.4814
YDR080W	41.298	39.7525	73.9604	60.2127	63.6684	71.0697	61.7805	80.8835	48.126	86.4492	74.6411	59.2089
YDR082W	1.11616	0	3.32822	2.64671	3.14412	4.40743	52.5319	59.7971	33.7332	74.0632	13.254	14.0322
YDR083W	72.5505	113.578	129.431	125.719	145.416	161.422	64.74	68.2946	50.8246	96.5603	63.4798	48.9415
YDR089W	74.2247	49.2173	91.3412	71.4612	69.9567	69.6924	94.7054	111.097	74.6627	106.924	83.3609	64.3426
YDR092W	114.407	141.973	132.759	132.336	158.778	131.947	61.0406	60.7413	67.9161	72.5466	61.0383	48.257
YDR093W	101.013	87.0768	69.5228	48.3025	69.1706	74.6508	183.122	167.432	145.727	177.196	216.599	212.194
YDR096W	88.7348	73.826	107.612	85.3565	106.114	84.292	135.029	138.792	97.1515	138.774	90.3367	87.6155
YDR099W	740.573	768.548	610.174	626.609	712.929	644.035	430.984	464.215	443.929	465.36	470.867	512.687
YDR100W	49.1111	35.9665	82.4659	84.0331	62.8824	78.7827	55.8614	47.8377	54.4228	56.3689	31.3911	35.2515
YDR103W	60.8308	45.4314	66.5644	71.4612	66.8126	75.7526	105.064	103.543	91.3044	96.5603	77.0827	76.6635
YDR106W	2.23232	1.89297	5.17723	5.9551	3.14412	4.68289	5.1792	5.66499	3.5982	5.05551	4.53427	4.79147
YDR108W	21.2071	24.6087	39.5688	26.4671	32.2272	33.0557	54.3816	56.3352	40.4798	61.4245	40.1109	39.0163
YDR110W	37.3914	32.1806	32.1728	35.7306	46.3758	48.2062	31.4452	41.2286	17.991	46.0051	35.9254	31.1446
YDR115W	116.081	73.826	89.4921	84.6948	80.9611	90.9032	44.0232	45.6347	40.03	44.2357	40.1109	50.3105
YDR118W	27.3459	24.6087	25.1466	17.2036	14.9346	27.2709	34.7746	36.5077	21.5892	44.7413	30.3448	27.7221
YDR119W	145.101	98.4347	150.879	136.967	172.927	167.758	165.734	184.112	195.203	213.09	178.929	167.702
YDR119W-A	6.69697	18.9297	36.6104	29.7755	40.0875	11.294	9.61852	5.03555	2.24888	8.08882	3.13911	1.36899
YDR121W	34.0429	24.6087	73.5906	48.9642	66.0265	83.4656	25.5261	34.6194	33.7332	30.3331	23.0202	18.8236
YDR122W	116.639	77.612	120.925	113.809	125.765	122.857	192.37	193.869	129.985	177.701	161.49	186.183
YDR124W	2.23232	0	2.58862	4.63175	3.14412	3.03011	14.4278	16.3655	16.1919	22.497	8.02218	6.84496
YDR126W	10.0455	18.9297	9.98466	6.61678	5.50221	13.2223	19.9769	20.1422	19.3404	19.2109	13.6028	10.6097
YDR127W	1036.91	959.738	918.219	803.939	896.074	944.842	1005.51	1000.5	1046.18	1051.29	1262.62	1240.65
YDR128W	34.601	18.9297	32.9124	26.4671	25.939	42.6969	117.272	99.4521	83.2085	118.805	100.452	105.412
YDR137W	37.3914	32.1806	42.5273	34.4073	47.1618	55.6437	56.6013	69.8682	33.7332	86.702	51.9698	42.0965
YDR138W	51.9015	35.9665	53.9911	48.9642	48.7339	52.0627	64.3701	72.386	52.6237	81.8993	54.0625	49.2837
YDR140W	33.4848	24.6087	44.3763	33.7456	42.4456	57.572	34.0348	34.6194	38.6807	37.9163	24.4153	28.7488
YDR145W	189.747	229.05	224.84	193.872	320.7	230.013	191.261	197.331	134.033	195.143	161.141	127.658
YDR147W	26.2298	18.9297	46.5951	35.7306	35.3714	47.6553	66.9597	66.721	56.2219	89.2298	37.6694	34.2248
YDR150W	409.631	111.686	431.189	331.501	355.286	504.65	694.013	693.647	395.803	758.327	936.153	603.041
YDR152W	82.5959	51.1103	135.717	125.057	121.835	134.702	78.4279	79.9393	67.9161	96.0547	53.7137	53.3907
YDR158W	1010.68	1175.54	703.364	763.576	750.659	741.549	596.718	612.449	575.713	635.983	861.163	936.39
YDR159W	40.7399	30.2876	30.3238	29.7755	32.2272	45.1761	69.9192	69.5535	40.9296	96.5603	93.127	73.5833
YDR160W	8.92929	0	12.2035	2.64671	9.43236	5.50928	64.74	76.4774	45.8771	90.2409	38.3669	38.3318
YDR161W	98.7803	102.221	133.499	122.41	141.485	159.769	69.5493	64.8327	70.165	76.8438	71.1532	56.1287
YDR163W	64.1793	54.8963	52.8817	51.6109	58.1662	52.8891	17.3873	21.4011	12.5937	26.7942	25.4617	18.8236
YDR165W	103.245	92.7558	166.041	154.171	165.066	196.681	141.688	137.533	126.387	190.087	105.335	97.5407
YDR167W	78.6894	45.4314	83.2055	56.9043	80.9611	69.9679	52.162	51.6144	35.0825	43.2246	43.9476	39.7008
YDR168W	277.924	213.906	324.686	269.303	294.761	321.742	98.4048	150.437	77.8112	173.404	139.865	112.942
YDR171W	202.583	149.545	315.441	239.527	249.958	242.133	157.226	174.985	125.038	165.062	103.242	118.76
YDR172W	620.028	637.933	783.611	860.843	819.829	859.448	494.614	517.717	457.872	541.192	469.472	407.617
YDR174W	267.321	246.087	352.791	347.381	323.058	353.971	315.931	315.037	284.258	313.189	187.998	200.215
YDR176W	49.1111	73.826	60.6476	66.8295	67.5986	67.2132	62.1504	81.513	30.135	82.6576	66.619	43.8077
YDR177W	213.745	200.655	255.164	216.369	245.241	247.367	114.312	118.021	114.243	127.399	98.3589	97.1984
YDR178W	204.816	147.652	162.343	116.455	128.909	135.804	61.4105	92.8429	78.261	82.6576	86.5	108.835
YDR179W-A	14.5101	17.0368	19.5995	14.5569	15.7206	17.6297	27.7457	24.863	23.3883	36.6525	28.252	17.7969
YDR180W	37.3914	41.6454	27.3654	25.1438	18.8647	25.6182	51.0521	47.523	31.4843	65.4689	82.6633	79.4015
YDR182W	116.639	90.8628	101.326	82.7098	124.979	115.144	108.763	94.1018	100.3	108.946	100.8	104.728
YDR183W	21.2071	20.8227	35.8708	31.7605	39.3015	39.6668	17.7573	17.9391	21.5892	25.0248	20.2298	20.5349
YDR188W	314.199	316.127	318.4	307.68	301.05	373.805	309.272	308.113	305.847	300.045	318.794	301.178
YDR189W	137.846	107.9	150.51	152.186	137.555	156.188	131.33	131.239	129.985	132.707	138.121	129.027
YDR191W	28.4621	20.8227	26.9956	19.1887	23.5809	31.6784	23.6764	23.2894	21.5892	23.2553	16.3931	20.8771
YDR195W	69.7601	75.719	103.175	80.7247	112.402	110.737	64.74	64.2033	50.3749	72.7994	44.2964	41.0698
YDR197W	40.7399	20.8227	48.4441	29.7755	43.2317	44.0743	34.0348	46.5788	40.4798	50.8079	41.1573	46.888
YDR201W	21.2071	15.1438	29.954	15.8803	17.2927	23.139	13.6879	10.7005	9.89506	15.9249	16.7419	9.2407
YDR204W	54.1338	20.8227	69.8926	52.2726	64.4545	66.6623	58.0811	53.8174	61.6193	61.1717	48.1331	50.9949
YDR205W	34.601	37.8595	44.7461	40.3624	35.3714	43.7988	67.3296	73.6449	78.7107	66.9855	63.4798	70.1608
YDR206W	73.6666	37.8595	111.68	93.9583	110.83	116.521	212.347	246.427	147.526	266.173	128.355	124.921
YDR208W	104.919	83.2909	123.144	107.192	123.407	130.845	162.405	154.214	126.387	181.493	138.121	124.236
YDR210W	135.614	138.187	150.879	183.946	198.866	162.248	85.0869	69.8682	67.4663	69.5133	51.9698	48.257
YDR211W	157.937	132.508	170.849	154.833	166.638	195.855	207.168	226.914	172.264	234.07	209.972	169.755
YDR212W	347.126	299.09	340.958	376.495	312.054	363.888	256.001	283.879	295.952	311.672	301.704	297.756
YDR213W	26.7879	18.9297	69.153	64.1828	71.5287	64.7341	75.8383	73.9596	63.4184	80.8882	31.7399	32.8558
YDR214W	498.924	503.531	626.075	631.903	645.331	617.315	406.197	404.418	446.627	421.882	340.071	317.948
YDR216W	142.311	96.5417	241.481	206.444	253.888	255.355	361.434	360.986	292.804	385.988	190.44	210.14
YDR221W	55.25	45.4314	71.7416	54.9193	58.1662	78.5073	70.2892	77.4216	76.4618	78.866	61.7359	63.3159
YDR222W	31.2525	20.8227	48.0743	43.6708	55.0221	68.866	41.0637	40.2844	51.7242	54.8523	23.7177	23.2729
YDR223W	1.11616	1.89297	0	0	0.78603	0.275464	8.13875	5.97971	3.5982	8.34159	3.83669	2.39574
YDR225W	467.672	524.354	725.552	882.017	733.366	644.035	591.169	603.322	570.765	582.142	359.254	309.392
YDR226W	689.788	709.866	583.918	569.043	581.662	552.581	325.55	334.235	337.332	338.214	447.498	465.115
YDR227W	63.6212	41.6454	78.3981	67.4912	98.2538	81.2619	104.694	114.873	51.2744	142.06	87.8952	70.5031
YDR229W	45.7626	54.8963	72.1114	56.9043	48.7339	60.3266	42.1735	45.9494	26.5368	48.0274	36.9718	32.1713
YDR232W	255.043	208.227	204.501	185.932	199.652	192.549	223.816	241.706	220.84	199.945	215.901	230.675
YDR234W	158.495	159.01	130.54	160.126	180.001	152.607	178.682	174.041	197.451	190.34	186.254	175.915
YDR235W	34.601	15.1438	49.9233	41.6857	42.4456	53.44	47.7226	64.2033	35.0825	77.8549	42.2036	32.1713
YDR237W	136.73	98.4347	101.326	65.5061	97.4677	107.706	67.6996	65.1474	70.6148	66.7327	75.3387	85.9042
YDR241W	0.558081	0	4.43763	2.64671	6.28824	4.95835	4.06937	7.2386	5.39731	5.30829	5.92944	4.10698
YDR242W	7.25505	7.5719	14.4223	11.9102	11.7905	10.7431	59.5608	82.1424	47.2264	67.9966	27.9032	32.5136
YDR244W	64.7373	71.933	109.092	91.3116	93.5376	111.838	56.2313	72.0713	58.9206	76.3382	68.0141	61.2624
YDR245W	112.732	98.4347	107.982	84.6948	86.4633	104.401	92.4858	95.9902	97.6013	119.31	111.962	91.3802
YDR246W	46.3207	34.0735	49.1837	53.5959	43.2317	61.153	26.6359	45.3199	38.2309	38.9274	31.3911	28.0643
YDR247W	15.0682	7.5719	26.256	19.1887	26.725	24.2408	48.8325	46.5788	27.4363	44.4885	20.9274	16.7702
YDR251W	121.662	81.3979	116.858	84.6948	102.97	98.0652	173.503	193.554	147.526	184.779	162.536	150.931
YDR252W	12.2778	9.46487	22.5579	25.1438	25.939	25.0672	15.9075	14.4772	12.1439	14.1554	4.88306	5.13372
YDR254W	13.3939	9.46487	20.3391	12.5719	14.1485	18.7316	22.5665	27.6955	15.7421	32.1025	19.1835	17.1124
YDR262W	69.7601	58.6822	106.133	82.0481	75.4589	94.2087	75.0984	60.4266	58.4708	73.3049	33.4839	43.8077
YDR265W	16.7424	5.67892	21.0787	17.8653	13.3625	20.9353	39.5839	39.9697	37.3314	43.2246	14.6492	18.1391
YDR268W	55.8081	30.2876	48.4441	41.6857	33.7993	45.1761	32.555	46.5788	47.2264	51.0607	35.9254	39.0163
YDR270W	27.3459	11.3578	34.0218	20.512	18.0787	25.3427	36.9943	48.4672	33.7332	48.2801	36.9718	39.0163
YDR272W	157.937	130.615	182.682	183.946	166.638	183.184	78.058	83.716	70.165	99.088	58.9456	71.8721
YDR273W	3.34848	1.89297	1.47921	2.64671	1.57206	2.47918	4.43932	5.66499	2.69865	5.05551	3.4879	4.79147
YDR275W	6.69697	11.3578	9.98466	9.26349	10.2184	11.294	20.7168	34.9341	20.6897	30.8386	18.1371	18.4814
YDR279W	30.6944	22.7157	32.9124	26.4671	40.0875	39.6668	24.7862	38.7108	22.039	43.2246	33.8327	29.7756
YDR280W	50.7853	56.7892	93.1902	82.7098	84.8912	108.257	58.0811	58.2235	59.3704	75.0743	31.0423	31.8291
YDR285W	8.37121	3.78595	11.0941	10.5868	13.3625	10.4676	12.948	24.863	9.44529	25.5303	14.6492	8.5562
YDR287W	40.1818	22.7157	45.8555	32.4222	41.6596	41.5951	26.6359	28.6397	22.4888	33.6191	25.4617	29.7756
YDR288W	21.7651	9.46487	33.652	27.1288	35.3714	31.6784	27.7457	36.5077	19.7901	36.6525	29.996	21.5616
YDR291W	29.0202	20.8227	26.9956	25.8054	27.5111	29.1992	89.8962	120.853	61.1695	118.046	76.7339	65.3694
YDR296W	161.843	145.759	144.223	138.291	128.909	129.193	68.8094	89.0663	85.0076	73.5577	78.8266	71.5298
YDR297W	99.8964	96.5417	113.159	94.62	117.905	103.575	116.532	102.285	109.295	111.98	91.7319	89.669
YDR299W	101.571	92.7558	176.396	158.803	192.577	208.251	99.8846	88.1221	70.165	118.046	70.8044	50.9949
YDR301W	41.856	34.0735	51.4025	55.581	54.2361	57.572	105.064	111.097	81.8592	113.243	95.9173	95.1449
YDR302W	39.6237	39.7525	52.1421	41.6857	37.7294	53.7155	31.8151	40.9138	32.3838	39.9385	27.5544	33.1981
YDR307W	78.1313	70.0401	86.1639	65.5061	69.1706	79.3337	78.4279	83.716	85.4574	88.7242	88.9415	84.193
YDR311W	56.9242	39.7525	63.9758	56.2426	72.3148	62.5304	43.6533	62.3149	29.2354	58.6439	49.877	40.043
YDR312W	71.9924	81.3979	107.612	95.2816	117.118	125.887	54.7516	71.1271	59.3704	78.1076	68.0141	57.8399
YDR316W	98.7803	71.933	107.612	85.3565	86.4633	106.054	41.8036	72.0713	29.2354	84.6798	65.2238	65.7116
YDR317W	12.2778	13.2508	4.06782	1.98503	1.57206	6.61114	5.1792	2.51777	4.04798	3.79163	8.71976	9.58294
YDR318W	16.1843	11.3578	17.7505	15.8803	19.6508	22.5881	19.237	26.7514	12.1439	28.3109	19.1835	15.0589
YDR320W-B	0	0	0	0	0	0	0.739886	0.629444	0.449776	0.758327	0.34879	0.342248
YDR321W	288.528	323.699	305.826	280.551	288.473	312.376	223.446	196.701	245.128	225.981	209.274	206.376
YDR322W	159.053	115.471	173.067	148.216	126.551	183.735	87.3066	97.5638	91.7542	91.252	106.73	87.9577
YDR325W	35.1591	26.5016	42.1575	45.6558	35.3714	36.3613	66.2198	78.6805	44.5278	85.1854	77.4315	63.6581
YDR330W	66.9697	64.3611	77.2887	67.4912	62.0964	70.2433	51.792	62.0002	40.03	53.0829	54.0625	49.626
YDR331W	53.5757	58.6822	101.696	96.605	97.4677	111.838	101.734	99.7668	110.195	115.013	71.1532	65.0271
YDR332W	9.48737	5.67892	7.39604	5.9551	9.43236	8.53939	49.2024	56.0205	37.3314	61.1717	31.0423	26.0108
YDR334W	25.6717	11.3578	24.0371	26.4671	28.2971	30.5765	63.6302	104.173	39.5803	117.288	99.0565	75.2946
YDR335W	124.452	92.7558	157.536	124.395	134.411	146.822	240.093	284.509	195.203	283.614	217.645	211.167
YDR336W	9.48737	3.78595	11.0941	8.60181	8.64633	7.98846	24.4162	30.2133	21.1395	37.4108	19.1835	12.6632
YDR337W	142.311	102.221	103.914	108.515	90.3935	132.774	63.6302	73.0155	47.2264	78.3604	53.3649	68.7918
YDR347W	135.055	100.328	118.337	86.0181	93.5376	105.503	81.7574	104.802	92.204	103.638	118.24	146.824
YDR351W	87.0606	92.7558	95.0392	79.4014	86.4633	106.605	129.48	149.493	78.7107	171.129	117.891	112.942
YDR352W	71.4343	66.2541	62.8664	55.581	55.0221	53.44	41.0637	45.0052	60.2699	52.0718	50.9234	47.5725
YDR353W	531.851	583.036	465.581	449.279	473.19	433.03	310.012	315.351	331.485	315.969	296.472	296.387
YDR354W	130.033	107.9	97.6278	97.9284	100.612	113.767	102.844	102.599	104.348	107.177	108.474	109.862
YDR356W	58.5985	56.7892	99.107	74.7696	90.3935	92.005	32.185	64.518	30.5847	71.5355	59.6431	41.7543
YDR358W	123.336	77.612	152.359	125.719	143.057	134.702	65.4799	77.1069	53.0735	83.9215	60.6895	58.1822
YDR363W	21.2071	7.5719	32.9124	13.2336	25.153	38.565	33.6648	43.4316	17.5412	48.2801	23.369	21.2194
YDR363W-A	111.616	92.7558	118.707	129.027	113.974	144.068	38.4741	42.1727	23.8381	46.2579	33.8327	47.2302
YDR367W	72.5505	43.5384	49.5535	50.9492	55.0221	51.7873	60.6707	64.2033	64.7677	70.2716	78.129	58.8667
YDR368W	286.295	238.515	226.689	161.449	161.922	213.209	102.844	108.264	99.4004	101.869	152.77	140.322
YDR371W	34.601	20.8227	39.5688	27.7905	33.0133	37.4631	42.1735	49.0966	33.7332	57.8856	46.7379	37.9895
YDR374W-A	23.4394	3.78595	36.6104	17.8653	24.3669	26.9955	17.7573	27.0661	31.9341	20.222	22.3226	22.2461
YDR376W	61.9469	41.6454	47.3347	41.024	43.2317	57.2965	59.1909	60.1119	59.8202	69.5133	64.5262	63.3159
YDR377W	167.982	160.903	226.689	219.677	176.857	177.674	79.1678	134.386	97.6013	114.255	75.3387	105.755
YDR379W	55.8081	49.2173	74.3303	66.1678	88.8214	93.6578	100.994	126.203	58.9206	127.652	75.6875	56.8132
YDR380W	118.871	64.3611	228.168	181.961	176.857	236.073	138.359	190.721	183.958	208.287	71.1532	80.7705
YDR381W	469.346	514.889	445.612	389.067	393.801	452.588	305.573	336.438	305.847	346.808	199.857	235.124
YDR382W	728.853	865.09	714.458	867.46	771.095	641.831	601.527	574.053	602.699	604.892	626.427	571.896
YDR385W	4811.21	5105.35	3567.11	4090.49	3592.16	3511.34	5786.28	5365.69	6403.45	5377.55	7834.53	7918.25
YDR386W	21.7651	24.6087	37.35	19.8503	36.9434	33.6066	36.6244	45.9494	29.2354	51.0607	26.1593	24.2996
YDR388W	374.472	310.448	458.185	398.992	437.819	478.206	293.365	285.767	296.852	272.745	278.335	272.429
YDR389W	66.4116	70.0401	66.9342	41.6857	55.8081	62.2549	91.3759	98.8227	73.3134	91.7575	69.7581	79.7438
YDR392W	26.7879	18.9297	42.1575	24.4821	30.6552	31.9538	23.3064	29.8986	20.2399	38.9274	25.4617	21.2194
YDR393W	30.6944	37.8595	36.2406	24.4821	22.7949	32.7802	36.9943	55.391	31.0345	53.3356	40.1109	35.936
YDR394W	244.997	181.726	251.466	244.159	214.586	258.936	168.324	198.589	176.762	176.69	161.49	161.883
YDR395W	256.717	234.729	330.233	295.108	309.696	378.212	316.301	339.27	300.45	350.347	292.635	270.376
YDR396W	0	0	0	0	0	0	0	0	0	0.758327	0.34879	0.342248
YDR398W	106.035	104.114	170.479	139.614	167.424	222.024	160.185	152.325	162.369	155.457	91.3831	84.5353
YDR399W	105.477	94.6487	125.363	93.9583	99.0398	139.936	114.682	133.757	115.592	128.157	64.1774	54.0752
YDR401W	0.558081	0	0.369802	0.661678	0	1.92825	3.32949	3.14722	4.49776	3.03331	1.39516	3.42248
YDR403W	10.6035	3.78595	6.28664	9.26349	9.43236	3.03011	5.91909	13.8478	8.99551	8.59437	11.8589	14.7167
YDR405W	118.871	85.1839	138.676	128.366	94.3236	148.2	51.0521	67.9799	66.117	58.3911	42.9012	47.5725
YDR406W	35.1591	9.46487	49.9233	32.4222	29.0831	24.5163	157.596	190.721	147.976	160.765	84.0585	120.129
YDR409W	37.9495	37.8595	24.4069	20.512	41.6596	31.4029	56.2313	72.386	40.03	67.9966	51.621	44.8345
YDR412W	83.7121	60.5752	82.8357	96.605	95.1096	104.676	34.7746	33.99	24.7377	47.5218	40.1109	26.3531
YDR416W	44.0884	41.6454	37.35	33.0839	44.0177	44.6252	40.6937	41.858	29.2354	52.0718	52.6673	42.4387
YDR418W	935.901	1105.5	969.621	1246.6	1057.21	948.698	1131.29	975.008	1138.38	1156.7	1145.78	1132.5
YDR419W	20.0909	22.7157	24.7768	17.8653	28.2971	26.4446	44.7631	32.7311	30.135	47.269	36.2742	30.4601
YDR420W	171.889	149.545	114.639	78.7397	135.197	111.287	441.712	481.21	305.847	380.174	486.911	499.682
YDR421W	16.7424	22.7157	26.6258	23.1587	20.4368	31.6784	76.2083	94.7313	47.2264	91.7575	57.2016	48.5992
YDR425W	36.2752	13.2508	39.5688	32.4222	44.8037	42.146	35.8845	45.3199	26.9865	42.9718	39.4133	38.3318
YDR427W	217.651	230.943	289.925	303.049	280.613	308.244	169.804	203.94	186.207	240.642	167.071	156.75
YDR434W	121.103	96.5417	82.4659	71.4612	67.5986	85.9448	107.283	117.706	114.243	118.552	114.403	116.707
YDR436W	53.0177	43.5384	74.7001	52.2726	58.9523	64.1831	57.3412	70.8124	59.3704	59.4023	48.4819	60.5779
YDR438W	0	0	0	0.661678	0	0.550928	25.5261	29.2691	23.8381	30.0803	11.5101	11.6364
YDR439W	21.7651	17.0368	20.3391	9.92517	14.1485	22.5881	26.266	23.2894	13.943	27.2998	24.4153	19.5081
YDR440W	32.9268	28.3946	33.2822	26.4671	36.1574	31.4029	45.8729	51.9291	33.2834	52.8301	40.1109	30.8023
YDR442W	0	0	0	0	0	0	0	0	0	0.252776	0	0
YDR444W	18.4167	13.2508	27.7352	17.2036	15.7206	26.1691	58.8209	57.5941	53.9731	56.6217	35.9254	31.8291
YDR446W	2.23232	7.5719	0.739604	1.32336	0	0.550928	1.10983	0.629444	0.449776	0.758327	2.09274	0.342248
YDR448W	36.2752	37.8595	85.7941	56.9043	84.1052	95.0351	85.4568	90.9546	81.4094	90.4936	32.7863	26.6953
YDR450W	1030.22	1198.25	929.683	1247.26	897.646	975.694	1021.78	896.013	959.371	994.419	917.667	1012.37
YDR452W	97.6641	96.5417	109.461	74.7696	102.184	129.744	132.44	156.731	111.994	189.582	139.865	143.06
YDR456W	93.7575	45.4314	80.6169	69.4762	62.8824	74.3753	119.862	140.051	142.129	139.532	119.635	116.364
YDR457W	121.662	113.578	229.277	178.653	178.429	244.061	617.065	679.484	507.347	669.855	536.091	519.19
YDR460W	41.856	35.9665	62.1268	45.6558	51.092	57.0211	22.5665	23.2894	16.6417	33.8719	26.1593	25.3264
YDR461W	0	0	0.369802	0	0	0.275464	0	0.314722	0.449776	0	0.34879	0
YDR462W	99.8964	104.114	139.415	127.704	143.843	154.26	47.3527	42.4874	50.8246	51.3134	29.996	32.8558
YDR463W	149.008	104.114	209.678	175.345	202.01	204.394	111.723	116.132	99.4004	113.243	81.6169	85.9042
YDR464W	49.6692	35.9665	54.7307	38.3773	57.3802	58.9493	72.5088	65.7769	34.1829	81.3937	95.5685	65.0271
YDR466W	43.5303	34.0735	49.1837	41.6857	47.1618	49.0326	102.474	114.559	58.0211	115.771	79.5242	70.5031
YDR469W	47.9949	41.6454	59.1684	45.6558	51.092	61.9794	35.1446	38.7108	30.5847	40.9496	36.2742	34.2248
YDR471W	557.522	543.284	611.653	770.855	605.243	633.017	599.678	582.865	595.953	593.264	462.845	462.719
YDR472W	51.3434	43.5384	53.6213	55.581	54.2361	57.2965	45.503	44.0611	39.5803	38.9274	41.8548	40.043
YDR477W	191.98	160.903	234.455	179.976	209.87	247.367	137.989	156.417	145.727	169.865	129.75	136.215
YDR478W	17.8586	28.3946	24.4069	21.8354	36.9434	26.72	19.237	16.3655	15.2924	18.4526	10.1149	11.2942
YDR483W	286.853	287.732	188.969	152.848	176.857	172.716	195.7	223.453	203.748	228.256	278.683	292.622
YDR484W	39.6237	43.5384	54.3609	48.9642	49.5199	68.0396	41.0637	58.5383	31.4843	62.4356	49.5282	46.2035
YDR489W	26.2298	24.6087	35.8708	39.039	45.5897	35.5349	32.555	27.0661	29.2354	31.8497	20.5786	19.1659
YDR492W	87.0606	64.3611	68.0436	61.5361	65.2405	71.6207	68.8094	62.6296	70.6148	63.1939	55.8065	68.7918
YDR493W	69.202	43.5384	77.6585	62.1977	60.5243	69.417	25.1561	33.99	38.6807	33.8719	26.8569	37.9895
YDR494W	189.747	113.578	175.656	136.306	147.774	191.723	90.2661	119.28	71.5143	127.652	98.7077	111.231
YDR499W	15.0682	11.3578	21.4485	15.2186	18.8647	17.3542	37.3642	55.391	23.3883	60.4134	30.3448	24.6419
YDR501W	15.6263	15.1438	18.4901	15.8803	16.5066	18.7316	15.1677	14.4772	15.2924	20.222	10.4637	10.6097
YDR510W	177.47	215.799	184.162	187.917	188.647	192.274	82.4973	95.9902	105.247	110.716	121.03	119.445
YDR511W	66.4116	47.3244	74.7001	70.7996	74.6729	89.2504	42.9134	41.2286	51.2744	49.7968	47.4355	46.888
YDR513W	229.371	153.331	205.61	224.309	250.744	209.353	116.162	123.056	103.898	126.641	113.357	123.552
YDR515W	78.1313	70.0401	80.2471	78.078	73.8868	96.137	34.7746	44.6905	26.087	58.1384	42.5524	37.6473
YDR517W	109.942	88.9698	65.455	57.566	64.4545	74.6508	85.8268	86.5485	85.0076	71.0299	102.544	106.781
YDR518W	126.684	119.257	82.4659	72.1229	85.6773	78.2318	76.9481	49.7261	63.8681	74.316	94.5222	85.562
YDR519W	116.081	124.936	102.805	76.093	94.3236	112.94	55.4915	56.3352	70.6148	60.6661	59.2944	67.7651
YDR525W-A	84.2702	85.1839	136.827	130.351	144.63	120.653	76.5782	77.1069	92.6538	82.6576	41.8548	49.9682
YDR527W	39.6237	41.6454	44.7461	40.3624	29.0831	53.991	54.3816	42.8022	41.8291	54.8523	54.7601	35.5938
YDR528W	18.4167	17.0368	15.9015	17.8653	18.0787	20.1089	40.3238	49.7261	33.2834	50.8079	25.4617	28.4066
YDR531W	59.1565	60.5752	61.757	70.1379	63.6684	74.0998	61.4105	66.0916	72.4139	77.8549	81.2681	70.1608
YDR536W	1.11616	0	25.1466	10.5868	3.93015	8.26392	4.80926	24.863	7.64618	13.1443	1.74395	1.02674
YDR538W	25.6717	24.6087	19.5995	14.5569	22.0088	21.7617	44.3932	52.2438	43.6282	42.2135	19.881	27.7221
YDR539W	114.407	83.2909	127.952	109.177	120.263	128.917	93.2256	79.9393	100.3	96.813	93.8246	88.3
YEL073C	15.6263	9.46487	36.9802	48.3025	49.5199	53.1646	43.2833	39.3402	34.6327	43.7302	13.254	10.9519
YEL068C	12.8359	5.67892	12.9431	11.2485	7.07427	14.3241	8.50869	11.6447	13.943	11.8805	9.06855	10.2674
YEL064C	18.9747	11.3578	22.1881	21.1737	23.5809	20.9353	27.0058	28.6397	26.5368	29.0692	30.3448	21.5616
YEL063C	10.6035	13.2508	19.2297	13.8952	13.3625	22.0371	175.353	193.869	159.221	193.626	64.5262	62.6314
YEL061C	36.2752	26.5016	54.7307	41.6857	44.8037	58.3984	46.6128	84.3455	33.2834	97.5714	56.8528	44.4922
YEL060C	870.606	806.407	1186.7	842.316	886.642	1015.36	621.874	836.531	727.287	622.839	582.131	688.261
YEL059C-A	23.9975	24.6087	13.6827	13.2336	15.7206	15.7015	8.87863	11.9594	9.44529	12.8916	13.6028	16.0857
YEL057C	1.67424	0	2.21881	1.32336	0.78603	1.65278	3.32949	2.51777	2.69865	1.76943	0.697581	3.08023
YEL055C	189.189	160.903	167.151	160.126	140.699	184.561	192	192.924	141.23	261.117	227.063	184.814
YEL054C	859.444	1056.28	833.904	1023.62	879.568	858.346	958.892	846.916	918.442	944.369	936.851	894.294
YEL053C	30.6944	22.7157	39.199	30.4372	40.0875	38.565	85.8268	87.4927	65.2175	90.9992	63.8286	50.9949
YEL050C	205.932	136.294	181.203	126.381	172.927	179.878	118.752	118.335	129.086	121.838	134.982	157.776
YEL048C	15.0682	3.78595	22.5579	27.1288	14.9346	27.8219	20.3469	16.995	22.4888	24.772	12.9052	16.0857
YEL047C	193.654	162.796	200.803	209.09	206.726	212.658	134.289	104.173	114.243	111.474	116.845	120.129
YEL046C	543.012	477.03	799.143	711.966	674.414	753.67	613.366	661.231	655.323	524.509	386.111	392.901
YEL039C	89.851	83.2909	71.002	80.7247	122.621	77.4054	37.3642	26.7514	30.135	44.7413	28.9496	33.1981
YEL037C	247.23	223.371	245.918	236.219	246.027	255.631	135.399	126.833	137.182	125.124	127.657	117.049
YEL036C	140.078	121.15	110.571	98.59	146.202	117.348	170.544	191.036	157.421	160.512	159.048	141.006
YEL034C-A	0	0	0	0	0	0	0.739886	0	0.899551	0.252776	0	0
YEL029C	32.9268	17.0368	35.8708	28.4522	38.5155	40.4932	29.2255	29.8986	30.5847	39.6858	26.8569	26.3531
YEL025C	16.1843	9.46487	13.6827	13.8952	18.0787	12.1204	137.989	147.29	96.252	168.601	86.8488	101.305
YEL023C	0	0	1.10941	0.661678	0	1.10186	27.3758	29.2691	16.1919	30.5858	13.6028	11.9787
YEL017C-A	108.826	126.829	87.2733	33.0839	98.2538	28.6483	88.4164	88.7516	94.4529	39.433	119.286	50.9949
YEL016C	11.7197	11.3578	11.8337	9.26349	9.43236	13.2223	36.9943	43.7463	44.078	52.8301	26.1593	28.0643
YEL009C-A	1.11616	0	1.10941	0	0.78603	0.550928	0	1.57361	2.69865	1.76943	2.09274	0.684496
YEL009C	102.129	94.6487	72.851	50.2875	91.1795	76.579	964.811	1051.49	727.737	942.6	751.643	729.33
YEL008C-A	0.558081	0	0	0	0	0.550928	0.369943	0.629444	1.34933	0.505551	0.697581	0.342248
YEL005C	15.6263	7.5719	20.3391	13.8952	17.2927	16.2524	22.9365	31.1575	31.4843	31.8497	16.3931	17.7969
YEL002C	280.715	219.585	261.82	220.339	202.01	234.695	192.74	192.924	184.408	213.343	196.369	236.493
YEL001C	186.957	124.936	178.245	171.375	146.202	186.489	131.7	116.447	141.23	145.093	129.401	139.979
YER003C	584.868	469.458	471.498	447.294	514.85	470.493	276.347	259.96	303.599	253.787	350.185	347.724
YER007C-A	161.285	194.976	170.479	174.021	175.285	190.07	102.474	86.2338	73.7632	105.407	101.498	88.3
YER008C	95.4318	87.0768	107.243	96.605	128.909	119	134.289	157.046	94.0031	175.679	151.724	113.284
YER010C	39.6237	41.6454	41.4179	36.3923	39.3015	41.3196	45.8729	45.6347	42.2789	39.9385	35.9254	47.2302
YER017C	154.03	140.08	152.728	149.539	148.56	162.248	237.503	244.539	223.988	251.006	201.601	226.226
YER018C	24.5555	22.7157	38.8292	18.527	26.725	31.4029	34.4047	36.5077	29.6852	28.8164	26.1593	26.6953
YER019C-A	154.588	145.759	113.159	107.854	125.765	115.144	94.7054	82.1424	94.4529	99.5936	119.984	118.76
YER023C-A	0.558081	0	0	0	0	0	0	0	0.449776	0.252776	0	0
YER026C	410.189	350.2	493.316	529.342	476.334	527.514	340.718	316.295	380.51	405.452	259.151	274.141
YER027C	157.937	143.866	144.962	142.922	149.346	147.649	72.5088	74.9038	77.8112	77.3493	84.4073	75.9791
YER028C	10.0455	15.1438	2.21881	3.30839	2.35809	1.37732	12.2081	11.6447	12.1439	11.3749	13.6028	16.0857
YER029C	46.8788	26.5016	62.1268	44.3324	51.878	72.4471	26.6359	21.4011	24.2879	35.1358	26.8569	23.9574
YER031C	193.654	183.619	200.803	174.021	174.499	203.293	126.89	112.356	106.147	127.904	136.726	132.45
YER033C	29.5783	24.6087	24.7768	24.4821	36.9434	32.2293	85.8268	79.6246	44.5278	80.8882	65.9214	64.6849
YER036C	487.204	363.451	519.942	510.815	493.627	579.576	482.776	502.611	551.425	507.573	462.496	440.815
YER038C	2.7904	5.67892	5.91684	8.60181	3.93015	7.713	25.5261	22.3453	24.2879	28.8164	13.9516	12.6632
YER039C	0	0	0.369802	0.661678	0	0.275464	7.7688	14.4772	5.39731	13.6499	4.18548	6.50271
YER043C	2514.15	2763.74	1971.42	2454.83	2171.01	2315.28	2117.18	1865.99	2529.54	1825.04	2625.69	2720.53
YER044C	183.609	177.94	102.065	105.207	126.551	101.922	104.324	83.716	85.0076	88.977	126.262	131.765
YER044C-A	1.11616	1.89297	1.10941	0	0.78603	0.550928	6.65897	10.0711	11.6942	13.3971	3.4879	5.13372
YER045C	36.8333	45.4314	45.1159	32.4222	32.2272	29.4747	42.9134	54.7616	26.5368	30.3331	33.1351	38.674
YER047C	46.8788	30.2876	58.4288	50.9492	58.1662	59.7757	74.7285	71.4419	55.3224	70.0188	64.1774	50.6527
YER048C	208.164	166.582	242.96	170.051	202.796	207.424	113.203	106.691	82.7587	110.716	139.516	116.022
YER050C	90.4091	87.0768	150.879	123.734	165.852	134.702	63.6302	61.056	42.7287	72.2938	48.4819	43.4655
YER052C	406.841	327.485	371.281	354.659	331.705	411.819	261.55	284.823	295.503	297.264	272.754	304.943
YER053C	120.545	102.221	187.12	146.231	183.931	143.517	140.208	160.193	122.789	135.993	79.873	85.9042
YER053C-A	60.2727	41.6454	95.409	86.0181	97.4677	77.4054	58.0811	61.3708	51.2744	64.9633	25.8105	29.0911
YER054C	20.0909	3.78595	44.7461	30.4372	52.664	35.8103	58.8209	51.9291	29.2354	46.5107	18.8347	22.9306
YER055C	254.485	206.334	348.724	374.51	319.914	392.812	319.631	293.321	329.236	356.161	227.76	257.713
YER056C	299.131	287.732	508.478	469.13	499.915	552.03	580.811	556.113	638.681	620.564	261.942	260.793
YER056C-A	734.434	836.695	742.933	924.364	779.742	707.392	738.776	693.017	747.527	737.093	731.065	633.501
YER057C	184.725	179.833	152.728	147.554	159.564	171.614	66.2198	69.5535	75.1125	67.2383	92.0806	109.519
YER061C	28.4621	20.8227	24.7768	25.8054	30.6552	29.4747	35.1446	32.7311	28.7856	32.608	32.4375	34.2248
YER062C	354.381	308.555	411.22	334.809	284.543	385.925	144.278	223.138	196.102	196.659	179.627	233.413
YER064C	135.055	123.043	205.61	168.066	222.447	220.922	207.908	197.96	205.547	187.307	108.823	100.963
YER065C	7.25505	1.89297	3.32822	1.32336	0.78603	3.30557	18.1272	28.0102	22.4888	20.9804	9.76613	17.1124
YER071C	43.5303	45.4314	46.5951	36.3923	41.6596	58.9493	21.8266	19.8275	24.7377	19.7165	25.1129	18.8236
YER075C	35.1591	22.7157	38.8292	33.0839	33.0133	44.9006	69.5493	78.051	53.5233	78.6132	64.875	48.5992
YER076C	7.81313	1.89297	8.50545	4.63175	6.28824	7.713	15.9075	25.8072	18.4408	24.772	11.1613	10.6097
YER077C	88.7348	66.2541	151.989	114.47	99.0398	147.373	106.174	131.239	103.448	144.84	83.0121	73.2411
YER078C	41.298	45.4314	46.2253	34.4073	41.6596	44.0743	52.9019	53.188	54.8726	55.8634	55.8065	54.7597
YER082C	102.687	90.8628	159.385	144.246	126.551	184.285	114.682	127.777	97.6013	139.279	121.03	80.4283
YER083C	145.101	113.578	172.698	136.306	143.843	161.422	105.434	104.173	98.0511	94.7908	90.3367	99.9364
YER085C	1.67424	0	0	0	0.78603	0.826392	0	0	0	0.505551	0.34879	0
YER087C-B	90.4091	92.7558	72.851	58.2277	66.0265	67.7642	38.844	39.655	37.3314	37.6636	57.5504	67.7651
YER088C	111.616	100.328	143.853	108.515	128.909	119.827	257.11	212.752	183.508	219.915	151.026	145.113
YER088C-A	3.90656	9.46487	5.91684	5.29342	5.50221	4.68289	27.0058	24.5483	34.6327	21.2331	21.2762	21.2194
YER089C	121.103	92.7558	158.645	130.351	141.485	180.98	187.931	175.615	192.054	158.237	144.05	176.258
YER091C	2051.5	1892.97	1368.27	1456.35	1293.81	1470.15	1188.26	1337.25	1387.56	1342.49	1837.08	1905.98
YER093C	32.9268	26.5016	35.8708	26.4671	36.9434	41.8705	73.6187	79.6246	44.9776	85.4381	78.8266	71.1876
YER093C-A	32.9268	22.7157	21.0787	20.512	15.7206	20.9353	11.4682	11.0153	8.09596	11.6277	14.998	21.2194
YER094C	214.303	147.652	202.652	204.459	195.721	221.473	136.139	156.102	150.225	170.876	117.194	130.396
YER099C	73.6666	98.4347	124.254	127.704	114.76	123.408	66.2198	68.6094	69.7152	77.3493	49.877	43.4655
YER101C	47.4368	41.6454	62.4966	54.2576	69.9567	65.5605	34.0348	47.2083	30.135	39.433	23.7177	21.9039
YER105C	121.103	75.719	134.978	101.898	129.695	148.751	294.105	306.539	250.075	280.328	267.871	246.076
YER107C	104.361	56.7892	78.0283	64.1828	87.2493	88.1485	73.6187	70.183	71.5143	72.7994	74.9899	68.1073
YER109C	8.37121	9.46487	19.2297	14.5569	29.8691	14.8751	91.006	86.5485	43.1785	83.4159	43.25	46.5457
YER110C	260.624	251.766	287.706	250.776	303.408	326.425	400.648	400.956	423.239	390.791	356.813	306.654
YER111C	68.6439	47.3244	63.9758	48.9642	64.4545	61.704	73.2487	101.97	42.7287	116.782	112.659	86.931
YER113C	49.6692	35.9665	30.3238	26.4671	25.939	36.3613	83.6071	100.396	76.0121	102.374	93.8246	81.7973
YER114C	126.684	136.294	121.295	96.605	140.699	128.366	135.399	128.721	109.295	140.796	116.496	110.204
YER115C	2.23232	0	2.58862	3.97007	4.71618	4.13196	21.4567	19.5128	12.5937	20.7276	18.4859	15.7434
YER116C	32.3687	15.1438	44.7461	33.0839	47.1618	46.5534	33.6648	37.7666	24.7377	31.0914	19.881	20.1926
YER118C	101.013	92.7558	85.7941	66.8295	84.8912	101.095	86.5667	89.381	79.1605	93.0214	89.6391	81.1128
YER119C	71.4343	60.5752	56.9495	45.6558	57.3802	45.4516	78.7979	70.183	75.5623	61.1717	66.2702	72.8988
YER122C	267.321	223.371	284.378	224.309	272.752	258.661	183.122	184.112	156.522	210.056	201.95	171.466
YER124C	221	183.619	362.406	379.803	408.736	405.208	338.868	302.762	237.931	367.283	196.02	180.365
YER126C	140.078	138.187	209.678	196.518	182.359	242.408	99.1447	97.8785	88.6058	122.849	93.127	59.8934
YER130C	56.9242	51.1103	85.4243	55.581	58.1662	89.8013	85.8268	104.802	67.9161	100.099	53.3649	51.6794
YER132C	30.1364	18.9297	19.5995	18.527	25.939	21.7617	118.752	108.579	71.9641	112.991	127.308	117.733
YER134C	81.4798	66.2541	89.8619	70.1379	79.389	77.13	41.8036	45.0052	41.3794	46.2579	36.2742	32.5136
YER137C	10.0455	9.46487	20.7089	21.8354	24.3669	28.6483	9.24858	12.2742	7.64618	13.6499	6.97581	6.16046
YER139C	34.0429	26.5016	50.6629	41.024	47.1618	60.6021	22.9365	24.5483	27.4363	29.5747	16.0444	15.0589
YER142C	22.8813	17.0368	10.3545	7.94014	7.07427	13.4977	7.39886	12.9036	6.74663	13.6499	18.8347	20.1926
YER144C	41.298	45.4314	31.4332	26.4671	36.9434	39.1159	127.63	133.442	102.999	123.102	95.5685	98.2252
YER145C	107.151	138.187	112.05	59.551	80.9611	105.503	96.5551	124.63	118.291	75.3271	80.9194	93.7759
YER147C	22.8813	20.8227	34.7614	27.1288	36.1574	34.433	34.4047	32.1016	35.5323	38.6747	32.0887	28.7488
YER149C	41.856	34.0735	38.4594	29.1138	40.8736	46.278	43.6533	39.3402	36.8816	44.2357	45.6915	40.7275
YER151C	170.215	157.117	195.256	180.638	230.307	218.443	169.064	156.417	131.784	175.679	147.887	125.605
YER152C	51.3434	77.612	46.2253	34.4073	37.7294	49.0326	89.8962	78.6805	87.2565	83.4159	93.127	94.8027
YER155C	127.8	104.114	147.181	114.47	144.63	168.033	410.267	441.555	241.529	477.746	456.567	392.558
YER156C	208.722	240.408	229.647	234.896	205.94	241.031	133.549	123.371	128.636	144.335	135.331	126.974
YER158C	26.7879	20.8227	18.4901	11.2485	8.64633	10.7431	27.7457	24.863	20.6897	27.8053	21.9738	33.8826
YER159C	96.5479	98.4347	110.571	103.222	113.188	99.4425	56.9712	83.0866	30.5847	80.3826	69.0605	32.5136
YER161C	46.3207	22.7157	56.5797	55.581	73.1008	68.0396	40.3238	35.5636	28.3359	38.6747	23.0202	28.4066
YER162C	20.0909	22.7157	45.8555	28.4522	42.4456	29.4747	24.4162	35.8783	16.6417	30.8386	15.6956	15.7434
YER163C	45.7626	32.1806	68.4134	53.5959	62.0964	75.2017	49.9423	59.4824	56.6717	62.1828	44.994	41.0698
YER168C	88.7348	83.2909	106.133	96.605	110.83	133.049	91.3759	97.5638	74.213	102.88	76.3851	76.3213
YER172C	102.129	64.3611	171.958	147.554	191.791	177.674	252.671	284.509	188.456	311.925	213.111	184.472
YER174C	62.505	39.7525	56.9495	39.039	46.3758	48.7571	37.3642	47.8377	43.6282	43.9829	43.9476	45.1767
YER175C	66.9697	60.5752	80.9867	66.8295	79.389	75.2017	48.0926	44.6905	45.4273	51.819	34.879	42.0965
YER180C	0	0	0	0	0	0	23.3064	28.9544	18.8906	30.0803	17.4395	9.58294
YER180C-A	8.37121	11.3578	21.8183	12.5719	24.3669	19.558	11.0983	9.12693	8.54574	9.60547	4.88306	2.05349
YER181C	0	0	0.369802	0	0	0	1.84972	2.51777	1.34933	2.27498	0.697581	0.342248
YER183C	36.2752	35.9665	37.35	30.4372	42.4456	45.4516	31.4452	34.3047	37.7811	33.3664	42.9012	40.3853
YER184C	7.25505	5.67892	8.13565	6.61678	7.8603	12.1204	45.133	60.7413	33.7332	58.3911	16.0444	18.8236
YER186C	1.67424	0	1.10941	0.661678	0.78603	0.550928	38.4741	43.7463	38.6807	46.0051	17.7883	21.5616
YER188C-A	1.11616	0	0	0.661678	0.78603	0	5.54915	4.09138	4.94753	3.03331	2.09274	1.02674
YEL072W	1.11616	0	2.21881	3.30839	4.71618	2.20371	19.237	22.3453	17.5412	25.2776	7.3246	6.50271
YEL071W	630.073	613.324	558.401	485.01	535.286	571.863	473.527	434.001	459.671	447.16	456.915	486.334
YEL070W	3.90656	7.5719	9.24506	1.32336	7.8603	8.53939	10.7283	12.2742	10.3448	8.34159	6.97581	9.2407
YEL066W	110.5	90.8628	77.2887	76.7547	69.1706	85.3939	57.7111	51.9291	47.6762	48.0274	64.875	70.1608
YEL065W	22.8813	17.0368	146.072	52.2726	87.2493	137.181	96.1852	166.173	156.972	95.0436	13.6028	24.9841
YEL062W	23.4394	22.7157	24.7768	19.8503	31.4412	26.1691	43.2833	50.3555	40.9296	49.7968	39.4133	42.781
YEL058W	333.174	291.518	296.212	208.429	214.586	295.573	251.561	319.128	316.192	263.645	321.933	368.943
YEL056W	54.1338	56.7892	58.059	47.6408	59.7383	64.1831	67.6996	68.6094	71.9641	69.2605	56.1552	52.0217
YEL052W	63.0631	62.4682	67.304	47.6408	49.5199	59.7757	75.8383	90.0104	80.9596	86.1965	71.1532	71.1876
YEL051W	301.922	302.876	232.606	238.204	242.883	244.888	134.289	131.554	109.745	168.854	210.669	183.787
YEL049W	3.34848	0	1.47921	0.661678	1.57206	1.10186	10.7283	16.0508	11.6942	10.3638	7.3246	11.2942
YEL044W	54.6919	60.5752	37.35	29.7755	40.0875	42.6969	28.8556	33.3605	28.3359	33.6191	38.0181	37.6473
YEL043W	53.5757	37.8595	50.2931	41.6857	62.8824	53.991	170.174	159.564	112.444	165.062	138.819	123.209
YEL042W	200.351	181.726	126.842	130.351	156.42	142.139	166.104	141.625	170.015	147.115	212.065	189.948
YEL041W	15.6263	1.89297	26.256	14.5569	23.5809	18.7316	28.8556	25.4925	19.7901	30.8386	12.5565	18.8236
YEL040W	434.745	389.953	417.877	379.803	471.618	478.481	452.81	445.331	480.36	451.457	395.528	347.382
YEL038W	91.5252	70.0401	62.8664	61.5361	62.8824	62.8058	48.8325	43.4316	49.4753	47.5218	55.1089	68.1073
YEL034W	1747.91	2248.85	1323.52	1722.35	1494.24	1274.02	1304.05	1180.84	1401.95	1275.25	1725.12	1822.81
YEL033W	1.67424	1.89297	1.84901	0.661678	0.78603	2.47918	320.001	262.163	357.572	384.977	520.744	559.233
YEL032W	90.9671	66.2541	109.092	99.2517	91.9655	118.45	155.006	168.691	196.552	164.304	153.468	152.985
YEL031W	425.257	335.057	386.443	346.058	371.792	429.999	585.25	576.57	686.807	546.248	575.853	597.907
YEL030W	3.90656	3.78595	11.0941	6.61678	12.5765	6.06021	51.0521	58.5383	45.4273	50.0496	29.6472	23.2729
YEL028W	0	0	0	0.661678	0	0.550928	9.61852	10.0711	7.64618	10.111	1.39516	2.05349
YEL027W	677.51	838.588	619.419	648.444	595.025	536.604	418.036	402.215	419.641	427.191	497.375	460.666
YEL026W	274.018	251.766	271.435	236.219	268.036	263.619	179.422	167.432	192.054	165.062	250.083	181.391
YEL024W	342.661	265.016	444.872	443.324	350.569	353.696	196.44	286.712	191.604	266.425	157.653	180.022
YEL022W	92.6414	71.933	120.925	89.9882	110.044	125.061	179.422	200.478	143.478	218.145	193.579	178.311
YEL021W	601.053	620.896	935.23	949.508	684.632	674.061	483.146	681.058	421.889	738.61	393.784	324.109
YEL020W-A	165.192	117.364	173.067	173.36	135.983	153.434	97.665	112.041	87.2565	123.354	106.73	95.8294
YEL018W	22.8813	13.2508	32.1728	19.8503	31.4412	34.9839	22.5665	22.3453	19.7901	27.2998	21.9738	11.6364
YEL017W	78.6894	60.5752	83.9451	80.7247	87.2493	90.0768	80.6476	68.2946	73.3134	70.7772	54.0625	54.0752
YEL015W	127.8	102.221	197.474	181.3	176.071	189.795	112.463	145.401	101.649	156.468	92.0806	92.7492
YEL013W	236.626	159.01	240.371	187.917	196.508	244.061	197.55	204.569	176.762	232.048	208.577	216.643
YEL012W	35.1591	32.1806	41.4179	42.3474	33.0133	51.2363	22.5665	23.2894	17.991	27.5525	21.625	22.2461
YEL011W	109.384	43.5384	144.223	131.012	132.839	114.042	109.503	138.792	83.2085	144.588	67.6653	96.1717
YEL008W	0	0	0	0.661678	0	1.10186	0.739886	0.944166	1.7991	0.252776	0.34879	0.342248
YEL007W	120.545	73.826	110.201	102.56	114.76	101.095	194.22	208.975	115.143	226.234	190.788	154.354
YEL006W	24.5555	22.7157	30.6936	27.1288	27.5111	26.72	69.1793	72.0713	72.8636	66.9855	48.4819	44.4922
YEL004W	15.6263	30.2876	22.9277	13.2336	25.939	23.6899	22.5665	27.3808	23.3883	28.8164	18.1371	18.1391
YEL003W	74.2247	75.719	89.8619	89.9882	73.8868	104.676	29.2255	38.3961	14.8426	63.4467	42.5524	34.9093
YER001W	193.654	183.619	269.586	230.926	222.447	249.02	240.463	285.138	229.386	274.767	235.433	229.991
YER002W	114.407	143.866	195.995	162.111	204.368	201.089	45.503	41.2286	22.9386	67.4911	43.5988	28.4066
YER004W	173.005	159.01	113.529	101.898	89.6074	97.2388	66.9597	66.721	63.8681	55.8634	82.6633	113.626
YER005W	26.2298	13.2508	30.3238	21.8354	31.4412	33.0557	72.8788	74.5891	57.1215	78.6132	53.0161	45.1767
YER006W	292.434	318.02	303.608	290.477	323.844	388.955	193.11	201.737	224.438	236.092	225.319	191.659
YER007W	13.3939	7.5719	12.9431	8.60181	12.5765	13.7732	15.1677	20.4569	17.0915	18.7054	13.9516	15.7434
YER009W	436.419	490.281	362.406	398.33	349.783	379.039	254.521	244.854	268.966	276.284	349.488	357.649
YER011W	14.5101	28.3946	1.84901	5.29342	3.93015	2.47918	15.5376	19.8275	22.039	10.111	13.254	7.18721
YER012W	200.909	141.973	192.297	186.593	180.001	211.006	107.653	124	107.496	141.807	108.125	126.974
YER013W	61.3889	35.9665	62.8664	60.2127	56.5942	64.4586	56.2313	63.8885	46.3269	77.3493	53.3649	47.9147
YER014W	51.9015	41.6454	49.9233	40.3624	46.3758	51.2363	41.0637	42.1727	38.2309	43.2246	51.9698	62.2891
YER015W	13.952	17.0368	24.0371	15.2186	18.0787	19.558	41.4336	48.1524	44.9776	45.7524	23.7177	19.8504
YER016W	51.3434	49.2173	61.0174	56.9043	48.7339	60.3266	34.7746	39.0255	26.5368	50.8079	35.9254	27.7221
YER019W	73.1086	54.8963	62.1268	40.3624	55.8081	67.7642	73.6187	73.6449	76.0121	65.7216	75.6875	82.1395
YER020W	82.0378	60.5752	76.1793	70.7996	70.7427	71.0697	65.4799	80.8835	61.1695	81.3937	66.619	60.5779
YER021W	271.227	253.659	354.271	303.71	300.263	371.877	260.81	292.062	257.721	314.2	218.692	231.36
YER022W	79.8055	47.3244	88.3827	76.093	85.6773	102.473	67.3296	71.1271	43.6282	81.6465	72.8972	51.3372
YER023W	450.929	439.17	269.956	236.881	238.953	291.992	164.255	153.584	194.303	161.524	292.286	301.863
YER024W	21.7651	18.9297	17.7505	17.8653	10.2184	16.5278	55.4915	73.3302	43.6282	69.0077	35.9254	43.1232
YER025W	620.586	613.324	650.852	709.319	635.898	720.614	445.781	381.758	430.885	454.49	400.411	395.296
YER030W	103.803	128.722	120.186	106.53	119.477	126.438	28.4856	38.3961	17.0915	46.7635	48.4819	42.781
YER032W	67.5277	62.4682	86.1639	64.8444	99.0398	84.0166	96.5551	92.5282	66.117	93.0214	80.2218	78.0325
YER034W	40.1818	39.7525	60.2778	33.0839	49.5199	53.991	21.0868	23.6041	19.3404	21.4859	17.4395	18.1391
YER035W	98.7803	94.6487	204.131	178.653	197.294	165.554	64.3701	75.848	64.3179	67.4911	35.2278	30.8023
YER037W	11.1616	13.2508	15.5317	7.27846	4.71618	6.61114	5.1792	13.8478	3.14843	7.33049	6.97581	6.16046
YER038W-A	1.11616	0	0	0.661678	0	0.550928	2.5896	1.88833	2.24888	2.0222	0.34879	0.342248
YER040W	40.1818	43.5384	49.1837	35.0689	61.3103	50.6854	66.5897	71.4419	50.3749	74.8216	49.877	45.519
YER041W	6.13889	9.46487	8.13565	8.60181	7.8603	8.26392	52.9019	58.853	40.4798	60.6661	24.4153	23.6151
YER042W	72.5505	77.612	63.9758	67.4912	43.2317	46.8289	18.1272	28.9544	17.991	27.2998	30.6935	25.6686
YER046W	14.5101	11.3578	16.6411	12.5719	23.5809	18.1806	14.0578	10.7005	13.0435	14.1554	9.76613	12.3209
YER048W-A	56.3661	45.4314	61.3872	49.6259	58.9523	57.0211	31.8151	36.8225	32.3838	42.4663	34.879	32.5136
YER049W	236.068	183.619	238.153	222.986	246.027	287.585	231.214	242.336	206.447	265.667	249.385	207.745
YER051W	14.5101	5.67892	24.4069	13.2336	22.0088	19.8334	27.3758	21.0864	24.2879	31.8497	16.7419	16.4279
YER058W	42.9722	34.0735	32.1728	29.7755	23.5809	30.852	7.39886	8.81221	9.44529	11.6277	10.1149	15.4012
YER059W	51.9015	47.3244	63.606	56.9043	73.8868	72.7225	51.4221	46.8936	29.2354	52.8301	34.5302	26.6953
YER060W	25.6717	5.67892	9.61486	6.61678	7.07427	6.06021	19.237	21.0864	19.7901	19.4637	38.3669	43.8077
YER060W-A	41.298	45.4314	74.3303	66.1678	73.8868	77.6809	89.8962	92.5282	106.147	106.166	50.5746	57.4977
YER063W	111.058	140.08	163.453	146.231	143.057	159.769	82.8672	90.6399	97.1515	77.8549	70.1069	74.2678
YER066W	1.11616	5.67892	2.95842	2.64671	7.07427	4.40743	15.9075	30.2133	20.6897	24.0137	12.9052	10.6097
YER067W	79.8055	53.0033	296.212	263.348	273.538	272.159	154.636	125.574	141.679	150.401	30.3448	52.3639
YER068W	184.167	126.829	156.057	144.907	190.219	165.554	121.341	112.985	116.942	98.8352	91.0343	94.1182
YER069W	616.121	651.183	508.848	505.522	504.631	502.722	443.932	459.179	497.002	499.484	705.952	618.442
YER070W	395.121	369.13	732.208	691.454	638.256	728.052	975.17	939.13	1011.1	952.964	522.837	508.58
YER072W	158.495	151.438	178.245	191.887	182.359	181.531	70.2892	72.7007	81.8592	77.0965	74.9899	71.1876
YER073W	176.912	170.368	303.608	273.273	260.962	290.064	214.197	269.717	209.595	267.437	202.298	168.386
YER074W	1077.1	1351.58	949.652	1225.43	1113.8	781.216	860.118	863.597	875.263	898.617	993.355	860.411
YER074W-A	41.856	49.2173	54.7307	46.3175	45.5897	47.3798	22.9365	30.528	31.9341	32.608	31.0423	43.4655
YER076W-A	0.558081	0	1.10941	1.98503	0.78603	0.826392	0	0.944166	0.899551	0.505551	0.34879	1.02674
YER079W	35.1591	26.5016	56.5797	59.551	89.6074	53.991	24.7862	26.4366	17.0915	23.2553	15.3468	14.0322
YER080W	207.606	166.582	147.921	119.764	143.843	143.517	112.463	120.538	96.252	126.135	155.56	144.086
YER081W	190.864	172.261	185.271	150.863	207.512	187.04	144.278	135.33	130.885	164.051	151.724	130.054
YER084W	0.558081	0	2.95842	3.30839	3.93015	1.65278	5.54915	2.51777	3.14843	1.76943	2.79032	3.08023
YER086W	342.661	283.946	271.065	230.926	240.525	295.298	356.255	343.991	353.973	293.472	423.78	418.227
YER087W	60.8308	39.7525	51.4025	44.9941	42.4456	55.6437	34.4047	38.3961	29.2354	45.7524	52.6673	49.9682
YER088W-B	0	0	0	0	0	0	0.369943	0	0	0	0	0
YER090W	415.77	340.735	418.246	383.773	385.941	438.814	302.243	279.158	313.044	311.167	269.964	273.456
YER092W	39.6237	32.1806	80.9867	82.0481	95.8957	78.2318	35.8845	40.2844	44.9776	44.7413	21.9738	27.0376
YER095W	161.285	132.508	160.864	127.042	138.341	134.151	79.1678	91.5841	98.9506	93.2742	89.9879	86.2465
YER096W	6.69697	5.67892	3.32822	1.98503	1.57206	4.13196	3.32949	4.40611	4.94753	5.81384	8.37097	8.5562
YER098W	16.1843	9.46487	25.8862	13.2336	19.6508	19.007	43.2833	51.2997	17.5412	48.7857	33.4839	26.3531
YER100W	147.333	147.652	150.14	142.922	161.136	163.075	52.9019	58.2235	56.6717	54.094	56.1552	57.4977
YER102W	1610.62	2012.23	1475.88	1751.46	1629.44	1544.8	1967.73	1890.53	2183.21	1784.85	2193.89	2249.6
YER103W	107.151	64.3611	116.488	93.2966	102.184	103.575	71.7689	73.6449	60.2699	82.9104	43.5988	51.6794
YER104W	12.8359	22.7157	40.3084	31.0989	39.3015	41.3196	15.1677	22.0305	18.8906	20.4748	11.5101	9.58294
YER106W	1.67424	0	1.10941	0.661678	0.78603	0.550928	0.739886	0.629444	0.449776	0.758327	1.39516	1.36899
YER112W	129.475	92.7558	129.061	106.53	138.341	139.66	42.1735	43.1169	29.6852	67.9966	51.2722	45.8612
YER117W	997.848	1281.54	916.37	1146.03	933.018	790.307	900.071	942.592	1059.67	908.981	970.683	838.165
YER120W	424.699	384.274	344.656	346.058	371.792	351.492	220.486	190.721	226.687	179.976	250.78	262.504
YER121W	5.58081	3.78595	6.28664	6.61678	7.07427	3.58103	6.65897	7.86805	4.94753	5.81384	2.09274	2.39574
YER123W	67.5277	58.6822	79.1377	76.093	68.3846	78.2318	69.5493	70.183	44.078	91.7575	62.0847	54.4174
YER125W	315.874	280.16	340.218	305.695	322.272	351.492	316.671	338.955	266.267	328.861	324.375	319.317
YER127W	74.2247	56.7892	120.186	113.809	141.485	163.626	68.8094	62.6296	62.069	82.6576	52.3185	36.9628
YER128W	38.5076	34.0735	36.9802	32.4222	41.6596	41.5951	17.3873	19.198	14.3928	19.9693	17.4395	18.4814
YER129W	25.1136	24.6087	30.3238	17.8653	22.7949	21.2107	97.665	111.726	63.4184	127.399	93.4758	76.6635
YER131W	452.045	552.749	490.728	587.57	553.365	533.574	518.66	457.92	465.068	525.015	573.76	527.746
YER133W	355.497	316.127	372.761	331.501	335.635	388.68	203.099	272.864	181.26	280.328	221.482	211.509
YER136W	275.134	255.552	236.304	193.872	205.94	241.307	166.844	158.62	143.928	191.098	207.879	213.563
YER138W-A	1.67424	1.89297	0	1.98503	1.57206	0.275464	119.862	118.965	109.745	160.765	234.736	216.985
YER140W	23.9975	41.6454	14.7921	22.4971	16.5066	18.1806	33.6648	34.9341	31.9341	41.9607	30.3448	28.7488
YER141W	246.672	234.729	257.752	195.857	264.892	218.719	184.602	162.082	155.173	182.504	190.091	186.867
YER143W	138.962	104.114	129.431	107.192	99.8258	119.827	51.792	67.9799	61.6193	64.9633	55.4577	65.3694
YER146W	66.4116	77.612	70.6322	67.4912	63.6684	68.0396	43.6533	41.5433	39.5803	37.4108	38.7157	41.412
YER148W	110.5	90.8628	97.9976	95.2816	96.6817	110.737	78.058	91.2693	68.8157	99.8463	102.196	87.2732
YER150W	37.3914	20.8227	61.3872	74.7696	87.2493	77.6809	33.6648	33.6752	30.135	31.0914	12.2077	12.6632
YER154W	121.103	100.328	74.7001	60.2127	91.9655	79.8846	130.96	123.686	113.793	108.188	139.516	142.033
YER157W	65.2954	37.8595	63.2362	47.6408	61.3103	65.8359	72.1389	83.716	54.4228	91.252	67.6653	62.6314
YER158W-A	0	0	0.739604	0	0.78603	0	0	0.314722	0	0	0	0
YER164W	146.217	109.793	146.442	102.56	140.699	156.464	172.024	181.909	120.99	185.79	166.373	161.883
YER165W	1374.55	1404.59	965.923	946.861	1011.62	1007.92	620.394	623.149	631.935	597.309	996.145	973.696
YER166W	149.566	115.471	179.354	119.764	143.843	179.878	302.243	333.605	255.922	310.661	269.615	278.59
YER167W	79.2474	53.0033	94.2996	71.4612	80.1751	82.6392	129.48	124.945	89.0556	121.079	102.893	104.386
YER169W	55.25	45.4314	53.2515	41.6857	54.2361	51.5118	69.1793	76.7921	65.6672	63.6994	63.131	57.8399
YER170W	29.0202	18.9297	38.0896	33.7456	45.5897	44.0743	18.4972	27.6955	17.5412	25.7831	16.3931	18.4814
YER171W	58.5985	45.4314	74.3303	63.5211	81.7471	83.1902	105.434	103.543	88.6058	129.168	78.8266	67.0806
YER173W	15.6263	15.1438	18.4901	11.9102	17.2927	20.3843	63.2603	67.3505	48.5758	70.7772	29.6472	28.7488
YER175W-A	0	0	1.10941	0	0	1.10186	0	0.629444	0	0.758327	0.34879	0
YER176W	56.9242	43.5384	75.8095	67.4912	83.3192	86.2203	88.7863	86.8632	53.5233	98.0769	72.5484	62.2891
YER177W	1371.76	1497.34	1167.84	1229.4	1384.2	1270.72	1071.72	1006.48	1083.96	876.878	1055.79	1222.85
YER178W	770.151	664.434	568.756	494.274	474.762	567.456	514.221	498.519	551.425	448.171	705.603	771.769
YER179W	5.02273	5.67892	2.21881	2.64671	3.93015	3.8565	2.21966	1.57361	2.69865	3.79163	3.4879	4.79147
YER182W	90.9671	90.8628	90.2317	72.7846	76.2449	77.13	34.7746	39.0255	40.4798	50.3023	51.621	54.0752
YER187W	0	0	0.739604	0	0.78603	0.550928	0.369943	0.629444	0.449776	1.0111	1.39516	1.36899
YER188W	2.7904	9.46487	2.58862	1.98503	1.57206	1.92825	1.84972	4.72083	2.24888	4.04441	6.27823	6.50271
YFL057C	3.34848	1.89297	2.58862	2.64671	0	1.65278	31.0752	30.2133	21.1395	32.608	10.1149	9.92519
YFL054C	13.952	15.1438	32.5426	21.1737	22.7949	28.0973	54.0117	61.6855	44.9776	56.1162	40.4597	40.3853
YFL050C	1.11616	1.89297	0.739604	0	2.35809	4.13196	77.688	87.1779	48.126	93.7797	22.3226	24.2996
YFL048C	221	157.117	221.142	159.464	187.075	204.119	134.659	164.914	135.832	167.843	140.563	130.054
YFL045C	712.111	751.511	536.583	595.51	554.937	566.354	377.342	414.174	438.081	445.896	520.046	486.677
YFL044C	57.4823	37.8595	90.9714	67.4912	84.1052	92.8314	64.0001	61.3708	72.4139	66.48	41.506	48.9415
YFL042C	47.9949	30.2876	47.7045	43.0091	44.8037	60.8776	60.3007	70.4977	56.2219	54.8523	49.1794	49.9682
YFL039C	2535.92	2977.65	1789.84	1967.83	1795.29	1839.55	1953.67	1809.65	2107.2	1655.17	2707.31	3221.58
YFL038C	356.055	321.806	431.559	415.534	358.43	398.046	284.486	269.087	327.437	313.189	249.036	249.157
YFL034C-B	72.5505	79.5049	71.3718	82.0481	90.3935	83.4656	45.503	50.3555	36.8816	42.2135	34.1815	34.2248
YFL034C-A	83.7121	92.7558	94.2996	86.6798	99.8258	101.646	137.249	180.965	161.919	197.418	79.1754	51.3372
YFL033C	94.8737	56.7892	70.6322	51.6109	65.2405	58.1229	157.596	172.153	94.9026	158.237	161.839	145.113
YFL029C	34.601	17.0368	36.6104	19.1887	27.5111	30.3011	28.4856	32.7311	23.3883	29.0692	26.8569	25.6686
YFL028C	89.851	73.826	84.3149	80.7247	64.4545	90.9032	75.4684	63.2591	64.3179	77.6021	64.5262	65.0271
YFL027C	22.3232	20.8227	19.5995	25.1438	20.4368	25.8936	30.3353	25.1777	17.991	34.3775	22.6714	20.1926
YFL025C	55.8081	35.9665	48.0743	40.3624	28.2971	38.014	74.7285	79.3099	72.8636	85.9437	87.8952	86.5887
YFL024C	60.8308	41.6454	45.8555	35.7306	52.664	48.4817	88.4164	103.543	48.5758	102.121	75.6875	55.1019
YFL022C	584.31	605.752	493.686	483.687	489.697	542.389	373.273	340.529	365.668	358.688	408.085	391.532
YFL021C-A	0	0	0	0	0	0	1.47977	4.09138	1.34933	2.52776	1.74395	3.08023
YFL020C	0	0	0.739604	0	0	0.826392	11.4682	13.8478	9.44529	9.85825	5.92944	5.81822
YFL018C	655.745	518.675	692.27	580.292	551.007	637.148	321.85	354.377	382.759	374.613	389.948	429.521
YFL017C	63.6212	71.933	72.4812	71.4612	86.4633	76.8545	47.7226	52.2438	39.1305	55.3578	46.7379	45.519
YFL016C	234.952	189.297	290.665	256.069	269.608	260.038	168.694	197.645	156.072	196.407	156.956	158.461
YFL013C	77.0151	90.8628	150.51	118.44	143.057	138.283	97.665	96.9343	67.9161	104.144	70.4556	54.0752
YFL010C	502.831	503.531	525.489	487.657	591.095	491.703	206.058	180.336	190.255	173.657	209.972	212.536
YFL003C	3.34848	1.89297	0.369802	0	1.57206	0.550928	0.739886	2.51777	0.449776	5.56106	5.92944	6.84496
YFL002C	73.1086	58.6822	103.175	80.7247	99.8258	107.706	104.694	103.543	98.0511	114.507	74.9899	64.0004
YFR003C	94.8737	71.933	93.56	89.3265	101.398	96.4124	51.4221	50.6702	42.7287	49.0385	33.8327	35.2515
YFR005C	29.5783	13.2508	34.7614	26.4671	36.9434	35.2594	64.74	76.7921	62.9686	77.6021	32.4375	30.4601
YFR011C	104.361	85.1839	119.076	113.147	95.8957	108.533	38.4741	69.2388	45.8771	62.9411	47.4355	41.412
YFR014C	66.9697	35.9665	73.9604	63.5211	61.3103	61.704	65.8499	63.2591	56.2219	79.3715	37.3206	45.1767
YFR015C	102.687	58.6822	188.229	168.066	187.075	157.29	206.058	166.488	154.273	177.196	97.6613	99.5942
YFR016C	155.704	141.973	169.369	146.231	189.433	196.957	93.9655	122.112	52.174	141.554	142.655	111.573
YFR017C	37.9495	20.8227	66.5644	58.8893	64.4545	56.4701	44.3932	46.2641	36.4318	39.433	18.1371	26.3531
YFR018C	52.4596	28.3946	35.1312	29.1138	26.725	35.8103	63.6302	58.2235	69.2654	59.1495	67.6653	77.6903
YFR024C-A	157.379	136.294	153.468	108.515	121.835	135.804	108.763	129.98	108.846	114.507	123.821	133.477
YFR025C	73.1086	51.1103	48.4441	46.3175	43.2317	55.9192	68.0695	74.5891	68.8157	60.1606	81.2681	73.2411
YFR026C	2.7904	1.89297	2.95842	1.98503	3.93015	3.58103	8.50869	7.55332	6.29686	11.8805	3.83669	4.44922
YFR028C	75.3409	62.4682	82.8357	75.4313	59.7383	73.8244	105.434	113.615	86.3569	115.013	94.5222	84.5353
YFR031C	40.1818	34.0735	45.4857	35.0689	51.878	50.6854	71.399	90.9546	43.1785	126.641	82.3145	68.1073
YFR031C-A	1704.38	2152.31	1613.82	2022.09	1663.24	1614.5	1956.26	1916.03	2251.13	1871.8	2061.35	2096.27
YFR032C-A	546.919	719.33	446.721	607.42	528.212	485.643	489.435	415.118	425.038	433.004	470.169	467.511
YFR033C	229.929	155.224	327.645	250.776	232.665	252.876	113.942	152.64	101.649	128.41	116.845	112.257
YFR034C	66.9697	70.0401	80.9867	80.7247	77.0309	85.3939	65.4799	67.0358	53.9731	53.8412	44.994	42.781
YFR037C	220.442	170.368	280.68	226.956	293.189	319.263	164.255	160.823	150.675	152.424	134.982	119.445
YFR039C	56.3661	49.2173	40.3084	39.7007	44.8037	48.7571	59.1909	56.6499	58.4708	61.1717	72.1996	60.9201
YFR041C	60.2727	56.7892	98.3674	82.0481	92.7515	93.9333	52.162	61.056	36.8816	77.8549	35.9254	37.6473
YFR043C	25.1136	30.2876	32.1728	41.024	32.2272	44.0743	19.607	19.198	17.991	22.497	13.6028	18.1391
YFR044C	565.894	463.779	557.292	520.079	543.933	560.569	401.758	372.316	464.618	380.68	374.95	394.612
YFR046C	9.48737	3.78595	30.3238	23.8204	29.8691	22.0371	23.3064	29.8986	19.7901	31.8497	14.998	14.0322
YFR047C	166.866	124.936	90.9714	78.7397	88.8214	102.473	53.2718	49.0966	61.6193	52.3245	94.871	85.562
YFR050C	244.997	198.762	283.638	249.453	276.683	267.476	150.567	178.762	156.072	191.604	153.817	144.429
YFR051C	288.528	223.371	232.606	238.204	251.53	274.913	286.336	282.62	315.742	277.042	255.663	287.146
YFR053C	1141.27	800.728	1549.1	1639.64	1732.41	1636.26	1252.63	1133.31	1298.95	1102.86	591.2	775.192
YFR054C	0	0	0	0	0	0	1.47977	0.629444	0	0.252776	1.04637	0.342248
YFL055W	4.46464	1.89297	3.69802	3.30839	1.57206	2.47918	14.0578	25.4925	14.3928	19.4637	9.06855	12.3209
YFL053W	0	1.89297	2.21881	2.64671	1.57206	2.75464	1.84972	2.20305	2.24888	3.79163	2.09274	1.02674
YFL052W	7.81313	11.3578	24.4069	12.5719	11.0044	20.9353	16.6474	26.1219	16.6417	17.4415	7.67339	5.47597
YFL049W	68.0858	41.6454	75.0699	55.581	79.389	66.6623	102.844	117.706	65.2175	123.354	59.9919	76.3213
YFL047W	61.3889	41.6454	62.1268	44.9941	52.664	73.5489	73.6187	82.1424	71.0645	87.4603	88.5927	80.7705
YFL046W	39.6237	39.7525	38.8292	26.4671	27.5111	37.1877	27.0058	26.1219	24.7377	33.8719	30.6935	30.8023
YFL041W-A	0	0	0	0	0	0	2.5896	2.51777	1.34933	2.78053	0.697581	1.02674
YFL041W	112.732	73.826	86.5337	56.9043	59.7383	75.2017	56.6013	73.3302	66.117	65.9744	70.8044	77.6903
YFL037W	464.323	406.99	353.901	285.183	296.333	342.953	311.862	289.229	294.603	302.32	436.685	462.719
YFL036W	203.141	130.615	208.199	157.479	146.202	174.644	183.122	221.879	171.364	225.981	219.389	236.493
YFL034W	33.4848	24.6087	48.4441	36.3923	39.3015	45.727	61.4105	59.1677	42.7287	71.7883	54.0625	50.9949
YFL031W	124.452	71.933	118.707	76.093	128.123	125.612	544.556	511.108	536.132	454.238	382.274	470.249
YFL030W	14.5101	13.2508	23.2975	11.2485	11.7905	12.3959	19.237	31.7869	26.5368	21.9915	13.9516	22.9306
YFL026W	0.558081	0	0	0.661678	0	1.10186	13.3179	18.2539	14.8426	13.3971	6.62702	10.2674
YFL023W	61.9469	75.719	76.5491	73.4463	88.0354	96.9634	51.4221	50.9849	36.8816	60.1606	45.3427	39.7008
YFL021W	166.308	174.154	185.641	144.907	221.66	181.806	261.55	210.234	186.207	225.729	190.44	180.707
YFL017W-A	36.8333	39.7525	48.8139	33.7456	40.0875	39.6668	15.1677	14.7919	14.3928	15.6721	17.0907	12.3209
YFL014W	899.626	685.257	1026.94	1179.11	1022.63	932.997	684.395	755.332	794.304	700.188	393.087	579.768
YFL012W-A	0	0	0	0	0	0	0	0.314722	0	0.252776	0	0
YFL012W	2.7904	1.89297	0.369802	0	0.78603	0.275464	0	0.314722	0	0.252776	2.79032	3.42248
YFL011W	1.67424	1.89297	0	0	0.78603	0.826392	2.21966	2.51777	4.04798	2.0222	3.83669	3.76473
YFL010W-A	0	0	0	0	0	0	0	0	0	0.505551	0	0.342248
YFL009W	75.899	51.1103	97.6278	87.3415	108.472	98.8916	120.971	140.366	119.64	143.071	110.567	100.621
YFL008W	118.871	83.2909	200.063	148.216	175.285	189.244	108.393	145.087	63.4184	183.768	134.284	98.9097
YFL007W	94.8737	85.1839	156.057	100.575	120.263	164.452	290.405	341.788	295.952	339.225	264.034	289.2
YFL005W	253.927	189.297	231.866	184.608	189.433	212.107	89.5262	100.396	91.3044	106.671	120.681	115.68
YFL004W	205.374	159.01	182.682	140.276	150.918	162.524	132.07	165.544	108.846	176.943	198.462	189.263
YFL001W	39.0656	28.3946	41.7877	33.7456	35.3714	49.5835	39.5839	45.3199	40.03	38.4219	28.6008	33.1981
YFR001W	90.4091	81.3979	131.28	111.824	123.407	130.019	42.1735	50.9849	20.2399	78.866	45.3427	27.7221
YFR002W	157.937	145.759	201.172	187.255	161.922	231.39	188.671	206.458	143.029	234.07	154.514	164.279
YFR004W	192.538	164.689	240.002	207.767	204.368	258.385	134.659	131.554	129.086	138.774	106.032	116.364
YFR006W	178.586	140.08	212.636	176.668	184.717	207.975	125.041	136.589	126.387	144.84	119.984	121.156
YFR007W	34.601	15.1438	41.048	44.3324	33.0133	44.9006	30.3353	36.193	34.6327	29.322	33.8327	31.4868
YFR008W	39.6237	43.5384	52.1421	50.9492	77.0309	60.3266	36.2544	34.6194	26.9865	34.883	20.2298	20.8771
YFR009W	202.583	193.083	319.879	275.92	278.255	346.534	263.399	243.28	223.538	281.339	187.998	177.627
YFR010W	238.3	223.371	303.238	297.755	263.32	311.825	163.515	188.204	150.675	214.101	153.468	144.429
YFR010W-A	0	0	0	0	0	0	0	0	0	0	0	0
YFR013W	83.7121	60.5752	82.4659	60.2127	81.7471	102.473	85.8268	89.381	86.3569	101.616	82.3145	78.0325
YFR019W	80.3636	70.0401	92.8204	69.4762	98.2538	85.1184	198.289	257.128	120.99	244.181	230.202	228.279
YFR020W	6.69697	0	1.10941	1.32336	0	1.92825	24.4162	18.8833	21.1395	21.2331	7.67339	6.50271
YFR021W	40.7399	39.7525	22.5579	25.8054	24.3669	34.9839	38.844	31.7869	35.0825	36.9052	34.879	37.305
YFR022W	8.92929	11.3578	21.4485	15.2186	11.7905	13.7732	65.4799	68.2946	55.7722	61.1717	37.3206	44.15
YFR023W	8.92929	13.2508	0.739604	0	0.78603	0.826392	1.10983	0.944166	1.7991	2.0222	10.1149	12.6632
YFR027W	15.0682	7.5719	23.2975	15.2186	18.8647	27.8219	8.87863	18.2539	12.1439	14.4082	9.76613	8.89845
YFR029W	27.3459	18.9297	34.3916	23.8204	35.3714	25.8936	55.1215	52.8733	45.4273	40.6969	39.4133	42.0965
YFR030W	49.1111	34.0735	32.5426	30.4372	26.725	33.6066	167.214	181.28	147.077	160.007	99.754	114.995
YFR034W-A	3.34848	5.67892	6.65644	4.63175	4.71618	4.13196	7.7688	5.66499	10.7946	12.1332	8.02218	5.13372
YFR038W	40.1818	34.0735	62.8664	50.2875	57.3802	56.1947	86.5667	88.4368	62.9686	103.638	82.6633	60.2356
YFR040W	50.7853	62.4682	79.1377	56.2426	64.4545	88.9749	145.388	133.442	89.0556	148.379	116.496	102.332
YFR042W	42.9722	37.8595	24.0371	29.1138	29.8691	28.3728	26.6359	27.6955	30.135	32.3553	28.252	35.2515
YFR045W	51.9015	34.0735	41.7877	39.039	36.1574	36.6367	31.4452	31.4722	35.0825	31.5969	26.5081	25.3264
YFR048W	34.0429	32.1806	54.3609	46.3175	44.0177	61.4285	67.6996	71.1271	57.5713	66.9855	52.3185	47.5725
YFR049W	94.3156	51.1103	80.9867	70.1379	69.1706	77.13	28.1157	28.325	33.2834	34.6302	36.2742	43.8077
YFR052W	229.929	193.083	289.185	246.144	249.172	252.325	150.197	165.858	149.325	163.293	149.98	145.455
YFR055W	51.3434	41.6454	107.612	117.779	131.267	123.683	106.174	97.8785	93.1035	116.024	40.4597	35.936
YGL257C	25.1136	13.2508	19.5995	17.2036	11.7905	17.0788	56.9712	64.518	51.7242	71.0299	68.7117	59.5511
YGL252C	118.313	94.6487	130.91	102.56	116.332	143.241	122.821	138.163	111.095	164.304	128.704	111.573
YGL251C	6.69697	3.78595	11.4639	7.94014	10.2184	9.36578	55.4915	66.721	41.3794	70.7772	35.9254	24.9841
YGL246C	43.5303	47.3244	61.757	56.2426	58.1662	71.6207	55.4915	54.7616	54.4228	77.0965	32.4375	30.4601
YGL242C	113.848	92.7558	128.691	99.9134	102.184	132.774	44.3932	41.5433	36.4318	49.544	54.4113	44.8345
YGL237C	42.9722	28.3946	61.757	42.3474	44.0177	43.2479	35.5145	42.4874	29.6852	44.7413	29.2984	34.2248
YGL236C	67.5277	70.0401	58.4288	41.6857	33.7993	66.3869	62.1504	74.5891	72.8636	67.9966	81.9657	100.279
YGL231C	183.05	149.545	186.75	176.668	177.643	196.406	108.393	110.782	120.99	111.221	116.845	123.894
YGL230C	6.13889	1.89297	2.21881	3.97007	0.78603	1.92825	0.369943	0.629444	3.5982	1.0111	3.13911	3.76473
YGL229C	8.92929	7.5719	4.43763	5.9551	5.50221	3.58103	26.266	20.7716	16.1919	27.8053	28.9496	29.0911
YGL226C-A	89.2929	83.2909	55.8401	55.581	70.7427	74.3753	36.9943	28.0102	28.3359	31.3442	48.8306	50.9949
YGL224C	50.7853	35.9665	45.4857	35.7306	44.8037	53.1646	49.2024	53.188	51.2744	49.0385	51.621	44.15
YGL223C	45.2045	26.5016	46.9649	42.3474	44.0177	49.3081	73.2487	74.2744	62.9686	77.6021	39.7621	37.305
YGL222C	95.4318	77.612	254.424	268.641	290.831	273.536	133.549	114.873	130.435	128.157	41.8548	41.412
YGL221C	138.404	179.833	200.803	173.36	170.569	198.61	142.798	148.234	160.12	144.335	117.891	108.15
YGL219C	84.2702	92.7558	110.201	84.0331	100.612	107.982	109.133	114.559	88.6058	105.407	83.3609	91.038
YGL213C	77.5732	81.3979	102.435	88.0032	82.5332	101.922	77.688	75.2185	80.0601	89.7353	50.9234	62.6314
YGL206C	845.492	552.749	685.983	523.387	639.828	723.92	621.504	654.621	540.63	648.875	845.119	917.225
YGL204C	24.5555	11.3578	11.0941	7.27846	6.28824	10.7431	3.32949	6.29444	4.49776	6.57216	9.41734	11.2942
YGL203C	99.8964	96.5417	100.956	80.063	94.3236	112.94	92.4858	94.7313	107.946	117.288	98.0101	102.332
YGL201C	98.2222	73.826	130.54	107.854	111.616	146.822	140.578	125.574	133.583	134.729	115.798	109.519
YGL200C	242.765	219.585	164.192	138.952	144.63	166.105	133.179	146.66	142.129	143.324	181.022	214.247
YGL199C	0	0	0	0	0	0	2.5896	0.629444	0.899551	1.26388	0.34879	0.342248
YGL194C-A	10.6035	13.2508	8.87525	7.27846	7.07427	7.43753	10.7283	10.3858	9.44529	5.81384	5.58065	10.9519
YGL194C	37.3914	20.8227	57.3193	48.3025	48.7339	60.3266	58.451	51.9291	54.4228	59.4023	36.2742	36.9628
YGL193C	0	0	0	0	0	0	0	0	0	0	0	0
YGL190C	71.4343	56.7892	103.545	74.1079	73.8868	87.0467	92.8557	112.356	76.9116	145.599	92.4294	89.669
YGL189C	809.775	1120.64	770.668	988.547	922.013	806.283	1128.33	966.825	1132.09	1019.19	1287.39	1287.19
YGL187C	248.904	210.12	344.286	265.995	242.883	272.985	125.781	178.762	146.177	144.84	128.006	163.595
YGL186C	92.0833	81.3979	86.1639	81.3864	75.4589	91.7295	66.5897	69.2388	75.1125	77.6021	69.0605	81.7973
YGL185C	34.601	32.1806	44.7461	36.3923	42.4456	55.9192	31.0752	30.528	27.4363	42.2135	27.2056	29.7756
YGL184C	15.6263	15.1438	11.0941	5.9551	16.5066	7.713	9.98846	8.49749	6.29686	7.07772	7.67339	5.47597
YGL182C	0	1.89297	0.369802	0.661678	0	0.826392	0.739886	0.314722	0.899551	0.252776	0.34879	0
YGL179C	9.48737	3.78595	8.87525	7.27846	5.50221	10.7431	15.9075	16.995	21.1395	14.661	14.998	18.8236
YGL176C	10.0455	9.46487	8.87525	7.94014	5.50221	6.06021	37.3642	41.2286	24.2879	44.2357	31.3911	29.0911
YGL175C	6.69697	3.78595	6.65644	5.9551	7.8603	7.16207	15.5376	14.1625	6.74663	14.1554	6.27823	8.5562
YGL173C	385.076	314.234	662.316	567.72	634.326	666.899	607.076	700.256	557.272	733.807	489.004	457.928
YGL167C	189.189	155.224	173.437	136.306	148.56	178.776	297.434	349.027	279.76	310.661	321.933	346.355
YGL165C	0	0	0	0	0	0.275464	4.06937	2.51777	2.69865	1.76943	2.44153	1.71124
YGL164C	31.8106	45.4314	60.6476	37.7156	52.664	61.153	31.4452	38.7108	17.5412	47.269	32.7863	32.8558
YGL163C	40.1818	43.5384	36.9802	27.1288	36.1574	42.6969	57.3412	60.1119	45.4273	71.5355	54.0625	48.9415
YGL161C	122.22	85.1839	112.79	101.237	143.057	118.725	90.2661	71.4419	93.1035	93.5269	71.502	75.6368
YGL154C	12.8359	3.78595	8.87525	9.26349	7.8603	9.91671	17.7573	21.4011	14.8426	28.3109	13.9516	13.3477
YGL152C	0	0	0.369802	0	0	0	0.739886	0.629444	0.449776	0	0.34879	0
YGL150C	94.8737	56.7892	108.352	78.078	114.76	122.306	200.879	207.087	131.784	226.74	187.998	187.894
YGL147C	992.267	1338.33	1118.28	1569.5	1138.17	1188.08	1064.7	1232.14	1292.66	1439.3	1346.33	1302.25
YGL146C	0.558081	3.78595	1.10941	0.661678	1.57206	1.37732	7.02892	14.1625	11.2444	11.8805	2.79032	3.42248
YGL144C	10.0455	5.67892	13.3129	6.61678	11.0044	12.9468	22.9365	23.2894	25.1874	23.5081	14.998	24.2996
YGL143C	58.0404	35.9665	39.199	30.4372	32.2272	45.1761	34.4047	46.8936	45.4273	44.7413	53.0161	71.8721
YGL142C	49.6692	18.9297	35.1312	43.0091	27.5111	38.8404	72.8788	68.2946	84.5578	81.6465	71.502	64.3426
YGL140C	87.0606	56.7892	93.56	68.1528	102.184	99.4425	221.226	254.61	175.412	244.181	196.718	173.862
YGL136C	8.37121	7.5719	15.1619	10.5868	14.1485	10.1922	31.4452	35.8783	29.6852	30.8386	18.4859	20.1926
YGL131C	20.0909	26.5016	29.954	19.8503	18.0787	25.6182	94.7054	108.579	45.8771	115.771	76.7339	68.4496
YGL129C	160.169	90.8628	119.076	105.868	94.3236	134.426	84.347	86.8632	90.4049	95.0436	103.242	121.84
YGL128C	15.0682	13.2508	24.0371	19.8503	21.2228	28.3728	30.7053	26.7514	25.6372	21.2331	17.4395	11.9787
YGL127C	36.8333	32.1806	32.5426	32.4222	44.0177	40.2178	24.7862	23.6041	23.8381	18.4526	18.4859	19.5081
YGL124C	33.4848	18.9297	42.5273	39.039	48.7339	41.5951	39.5839	70.4977	40.9296	66.9855	40.1109	44.8345
YGL122C	363.869	429.705	395.688	368.555	525.854	429.724	162.775	183.483	185.308	162.787	144.399	145.455
YGL121C	50.2273	32.1806	59.908	38.3773	34.5853	46.8289	34.0348	42.1727	29.6852	31.5969	23.369	37.9895
YGL120C	204.816	153.331	231.126	213.722	260.176	261.966	213.827	177.503	204.648	189.076	172.302	147.167
YGL112C	83.7121	56.7892	111.68	89.3265	109.258	128.366	123.561	94.7313	108.396	113.496	80.5706	78.0325
YGL110C	39.6237	35.9665	65.8248	57.566	55.0221	66.9378	40.3238	50.6702	36.8816	73.5577	43.9476	34.9093
YGL108C	34.601	22.7157	48.8139	34.4073	37.7294	52.6136	22.1966	18.5686	9.89506	19.7165	9.41734	17.1124
YGL107C	130.033	96.5417	134.238	99.2517	101.398	128.091	88.7863	124.945	102.099	129.674	109.869	121.156
YGL104C	24.5555	20.8227	21.8183	24.4821	25.153	34.1575	41.0637	48.1524	35.982	47.7746	25.1129	31.8291
YGL095C	63.6212	43.5384	80.6169	67.4912	86.4633	92.2805	107.283	95.6754	73.7632	114.76	71.502	68.4496
YGL094C	30.6944	17.0368	32.9124	25.8054	24.3669	36.9122	134.289	140.681	82.7587	159.754	130.448	111.915
YGL091C	64.7373	68.1471	100.956	113.809	116.332	99.9935	50.6822	52.8733	65.6672	52.8301	40.1109	44.8345
YGL089C	13.3939	1.89297	2.21881	3.30839	4.71618	5.23382	2.21966	1.88833	3.5982	3.28608	6.27823	13.3477
YGL087C	146.775	157.117	156.796	136.967	198.866	153.434	68.8094	61.3708	54.4228	67.9966	54.0625	64.3426
YGL084C	107.71	79.5049	88.7525	78.7397	77.0309	87.3221	104.694	119.909	103.448	110.463	111.264	117.391
YGL078C	259.507	242.301	277.352	295.108	312.84	334.964	169.064	153.899	145.727	187.559	183.464	139.295
YGL077C	217.093	196.869	215.595	204.459	195.721	217.617	250.821	239.503	253.673	263.392	262.988	266.269
YGL076C	1859.52	2296.18	1758.04	2428.36	1957.21	1690.8	1780.54	1698.87	2013.2	1831.36	1939.62	1763.6
YGL075C	7.25505	7.5719	11.8337	6.61678	17.2927	12.6713	12.948	15.4214	10.3448	18.9582	11.8589	7.52946
YGL072C	0.558081	0	0	0	0	0.275464	4.43932	5.66499	2.24888	3.28608	2.44153	2.39574
YGL070C	61.9469	71.933	98.3674	90.6499	106.114	113.216	44.0232	46.2641	46.7767	52.5773	25.4617	21.9039
YGL065C	73.6666	73.826	99.107	65.5061	73.1008	97.5143	70.2892	62.3149	61.6193	82.6576	56.1552	65.7116
YGL064C	60.8308	37.8595	70.2624	51.6109	65.2405	82.9147	52.9019	51.9291	38.6807	51.3134	36.623	42.0965
YGL063C-A	0	0	0	0	0	0	0	0	0	0.252776	0	0
YGL061C	30.1364	39.7525	56.5797	39.7007	47.9478	54.8174	22.9365	23.2894	18.8906	29.322	22.6714	17.7969
YGL057C	34.0429	22.7157	48.4441	31.7605	30.6552	42.146	20.7168	32.7311	26.087	26.2887	19.881	19.1659
YGL056C	139.52	124.936	228.908	183.946	196.508	244.337	195.33	154.214	160.12	172.898	93.4758	103.017
YGL054C	179.702	187.405	179.354	181.961	160.35	182.908	108.023	128.407	124.588	144.84	111.962	117.049
YGL049C	333.174	327.485	341.697	293.123	355.286	352.319	204.209	210.234	150.675	222.948	225.319	208.087
YGL048C	269.553	217.692	379.787	322.237	309.696	402.729	220.856	213.381	204.198	236.092	171.605	178.996
YGL044C	76.457	79.5049	98.7372	68.1528	111.616	94.7597	29.5954	32.4163	25.1874	41.708	27.2056	25.6686
YGL040C	229.371	159.01	222.991	187.255	200.438	201.915	113.573	124.315	126.837	123.607	145.446	157.434
YGL038C	69.202	53.0033	72.4812	72.1229	67.5986	72.998	64.74	79.9393	65.2175	92.0103	50.5746	52.7062
YGL037C	710.995	573.571	750.699	747.696	714.501	693.343	396.209	411.971	400.75	386.999	318.794	458.955
YGL035C	106.593	83.2909	98.7372	74.1079	132.053	96.9634	116.532	96.3049	94.0031	95.8019	71.502	68.7918
YGL032C	2.23232	1.89297	0	0.661678	0	0.275464	0	0.314722	0	0.252776	0.34879	0.684496
YGL031C	1058.68	1450.02	1024.35	1141.39	1105.94	960.543	1024	928.115	976.013	996.694	1123.8	1041.12
YGL028C	224.906	162.796	299.91	280.551	374.936	374.08	408.047	309.686	326.537	322.542	155.212	134.161
YGL027C	155.146	134.401	120.186	65.5061	94.3236	118.174	130.96	126.833	116.492	126.893	154.863	148.536
YGL026C	935.343	882.126	859.051	809.232	829.262	827.219	640.001	543.525	611.695	574.306	683.629	661.908
YGL025C	48.553	60.5752	79.5075	71.4612	69.1706	80.9864	52.5319	59.1677	36.8816	48.2801	50.5746	43.1232
YGL023C	80.3636	60.5752	61.0174	44.9941	66.8126	57.2965	96.1852	91.8988	76.4618	90.2409	78.4778	87.6155
YGL020C	75.899	47.3244	85.7941	77.4163	77.817	94.2087	60.3007	70.4977	49.9251	75.3271	47.0867	51.6794
YGL018C	29.0202	30.2876	55.4703	44.3324	58.1662	48.7571	26.6359	27.0661	27.4363	25.7831	20.9274	15.4012
YGL015C	0	0	0	0	0.78603	0	0.739886	0.944166	0	1.0111	0.697581	0.342248
YGL013C	65.8535	45.4314	86.1639	72.1229	62.0964	87.3221	125.411	138.478	98.9506	147.368	111.613	109.177
YGL011C	214.861	145.759	288.446	283.86	269.608	308.244	174.243	161.767	205.997	194.637	131.494	141.691
YGL009C	1197.64	1308.05	1215.91	1261.16	980.179	983.682	755.054	1028.2	765.518	1135.97	1226	1065.42
YGL008C	5725.91	6095.38	5224.2	5057.87	4852.16	4749.28	7630.07	7887.24	8359.08	7186.66	8687.67	9152.05
YGL007C-A	0	0	0.369802	0	0	0.275464	0.739886	0	0.449776	0.505551	1.04637	0.684496
YGL005C	32.3687	17.0368	42.8971	47.6408	43.2317	46.0025	40.6937	38.7108	31.4843	42.2135	32.0887	28.4066
YGL004C	47.4368	20.8227	28.4748	25.8054	23.5809	31.4029	29.2255	26.1219	32.3838	30.5858	27.5544	22.2461
YGL003C	34.601	18.9297	22.1881	21.1737	27.5111	32.2293	42.5434	50.6702	42.7287	46.5107	35.2278	32.1713
YGL001C	264.53	242.301	204.501	210.414	207.512	231.941	152.786	135.33	159.67	162.282	168.466	155.381
YGR001C	128.359	98.4347	149.4	163.434	159.564	172.716	87.6765	89.381	98.5009	88.4714	76.7339	86.931
YGR002C	64.1793	53.0033	102.805	81.3864	91.1795	102.197	68.4395	74.5891	60.7197	69.2605	48.1331	50.6527
YGR005C	146.217	111.686	149.03	133.659	137.555	162.799	55.1215	56.0205	33.7332	80.1298	62.0847	56.1287
YGR008C	121.103	70.0401	179.354	166.743	183.931	191.723	58.0811	60.7413	48.126	66.2272	23.7177	36.2783
YGR009C	143.985	128.722	206.35	181.961	220.088	227.258	89.8962	113.3	78.7107	119.057	82.6633	74.2678
YGR015C	10.0455	3.78595	15.9015	13.2336	14.9346	13.4977	32.185	24.5483	29.2354	32.608	13.6028	15.4012
YGR018C	0	0	0.369802	1.98503	0.78603	2.20371	0.369943	0	0.449776	0.252776	0	0.342248
YGR020C	158.495	176.047	172.328	174.683	183.145	163.35	92.1158	99.7668	87.7062	96.0547	128.006	108.15
YGR024C	34.601	32.1806	26.9956	22.4971	21.2228	34.9839	59.1909	72.7007	58.0211	80.1298	45.3427	53.3907
YGR027C	692.578	810.193	664.165	799.307	693.278	539.359	843.47	744.317	913.044	754.788	937.548	700.582
YGR030C	41.298	34.0735	68.0436	62.1977	47.1618	80.711	20.3469	23.9189	22.4888	30.8386	17.4395	13.6899
YGR033C	70.3182	43.5384	84.3149	68.1528	67.5986	84.8429	64.74	63.5738	44.078	79.8771	53.0161	54.7597
YGR035C	1.67424	1.89297	1.84901	0.661678	0.78603	1.37732	0.369943	0	0	1.0111	1.04637	0.342248
YGR036C	22.8813	22.7157	38.0896	31.7605	29.8691	31.9538	33.2949	30.2133	25.1874	34.883	10.8125	18.8236
YGR037C	297.457	353.986	198.214	214.384	199.652	196.957	77.688	86.5485	95.3524	86.4492	151.724	151.274
YGR043C	42.4141	24.6087	22.5579	19.1887	8.64633	22.0371	12.5781	15.7361	17.0915	18.4526	15.3468	26.6953
YGR044C	121.103	124.936	110.571	107.192	113.188	111.287	112.463	82.7718	101.649	88.977	98.3589	103.017
YGR045C	0	0	0	0.661678	0.78603	0.550928	4.06937	5.97971	4.49776	4.04441	4.18548	3.76473
YGR047C	80.3636	70.0401	68.0436	58.2277	59.7383	73.8244	60.6707	67.3505	58.0211	81.6465	80.9194	76.6635
YGR050C	1.11616	1.89297	4.06782	5.29342	0	3.8565	7.7688	5.35027	2.24888	5.05551	4.88306	2.39574
YGR053C	7.25505	9.46487	3.32822	1.32336	3.14412	4.95835	6.28903	7.55332	5.39731	5.81384	5.92944	7.18721
YGR057C	10.6035	7.5719	20.7089	6.61678	8.64633	19.2825	29.5954	39.3402	22.9386	38.1691	23.7177	21.2194
YGR061C	492.227	363.451	411.59	355.983	361.574	432.754	530.868	559.89	531.635	564.953	722.345	731.042
YGR062C	23.9975	13.2508	15.9015	11.2485	14.9346	22.0371	26.6359	33.3605	32.3838	31.8497	28.6008	39.0163
YGR063C	60.8308	77.612	98.7372	91.3116	91.9655	96.9634	36.2544	41.5433	47.6762	43.4774	40.4597	35.2515
YGR065C	74.2247	54.8963	64.3456	46.3175	38.5155	55.6437	77.688	109.208	101.649	112.738	79.1754	90.6957
YGR067C	9.48737	7.5719	4.80743	3.97007	5.50221	4.68289	10.7283	11.33	4.94753	9.60547	11.5101	10.2674
YGR068C	25.1136	45.4314	33.652	39.039	30.6552	39.3914	69.5493	64.518	74.213	61.1717	58.5968	59.8934
YGR071C	24.5555	18.9297	25.1466	26.4671	22.7949	33.0557	60.6707	66.0916	26.5368	74.316	50.2258	44.15
YGR073C	0	0	0	0	0	0	5.1792	8.81221	4.49776	8.08882	5.92944	3.42248
YGR075C	21.7651	17.0368	28.8446	25.1438	29.0831	31.6784	14.4278	18.5686	17.5412	21.7387	12.5565	11.2942
YGR076C	133.381	106.007	113.529	95.9433	98.2538	101.646	31.0752	38.3961	33.7332	50.0496	33.1351	29.7756
YGR077C	35.7172	26.5016	32.9124	26.4671	29.0831	35.2594	70.6591	77.4216	49.4753	71.7883	72.1996	74.6101
YGR078C	102.687	126.829	129.801	125.719	132.839	139.385	52.5319	54.4469	61.1695	55.3578	52.6673	49.9682
YGR081C	77.5732	64.3611	100.586	98.59	99.8258	109.084	53.6417	52.5585	43.1785	63.6994	49.5282	24.9841
YGR083C	230.487	198.762	270.695	269.965	285.329	278.219	181.642	192.924	161.919	214.859	173	154.012
YGR084C	212.629	189.297	151.989	143.584	147.774	169.686	95.8152	114.244	97.6013	103.385	117.891	116.707
YGR085C	1261.26	1531.42	1191.87	1424.59	1255.29	1181.47	1382.11	1274.31	1372.72	1299.01	1409.11	1328.95
YGR086C	1115.6	1014.63	998.466	1004.43	1006.12	920.05	685.504	698.682	622.04	670.866	795.242	933.31
YGR087C	3.90656	30.2876	14.0525	15.2186	7.8603	11.845	17.3873	88.7516	90.4049	66.48	98.0101	101.99
YGR095C	64.7373	53.0033	61.757	60.2127	49.5199	71.0697	38.4741	40.9138	39.1305	44.7413	45.3427	42.781
YGR098C	24.5555	32.1806	25.8862	25.8054	20.4368	22.0371	100.255	114.873	64.3179	125.882	138.121	108.15
YGR102C	47.9949	26.5016	44.0065	24.4821	46.3758	39.1159	36.2544	32.7311	31.9341	36.6525	33.1351	27.7221
YGR104C	36.8333	32.1806	45.1159	28.4522	33.7993	42.6969	43.2833	39.9697	33.2834	39.9385	29.2984	31.4868
YGR106C	290.202	187.405	197.844	177.991	186.289	209.353	160.185	157.676	153.823	178.46	211.367	241.627
YGR109C	35.1591	32.1806	41.048	46.9791	58.1662	64.1831	37.7342	33.99	36.4318	39.433	16.0444	18.1391
YGR117C	40.7399	43.5384	48.0743	40.3624	49.5199	51.5118	78.7979	75.848	51.7242	89.4825	58.9456	50.6527
YGR119C	179.702	164.689	218.553	204.459	210.656	211.556	143.168	148.234	109.295	177.196	111.264	109.862
YGR120C	33.4848	43.5384	43.2669	33.0839	45.5897	49.3081	37.7342	33.6752	31.0345	41.9607	29.2984	30.4601
YGR121C	22.3232	24.6087	20.3391	14.5569	14.9346	12.3959	37.3642	36.8225	36.8816	41.9607	37.6694	33.1981
YGR122C-A	5.58081	1.89297	2.21881	3.30839	7.07427	4.95835	39.5839	47.2083	36.8816	49.544	28.6008	21.5616
YGR123C	130.033	141.973	128.691	126.381	106.9	135.253	78.4279	77.1069	90.8547	92.0103	114.752	93.4337
YGR128C	108.268	83.2909	130.54	135.644	157.206	168.584	148.347	148.863	123.688	162.282	138.47	112.257
YGR130C	434.745	340.735	502.931	448.618	475.548	436.611	221.226	245.483	155.622	275.778	217.296	210.14
YGR132C	246.114	200.655	217.814	168.066	159.564	185.663	120.601	152.955	144.378	157.479	184.161	176.6
YGR138C	169.656	179.833	150.879	112.485	113.974	131.396	150.197	196.701	129.535	154.193	159.746	164.621
YGR146C	57.4823	37.8595	38.0896	21.1737	40.0875	32.2293	29.9654	39.3402	32.3838	34.6302	32.0887	39.0163
YGR146C-A	0.558081	1.89297	0.369802	0	0	0.275464	0.739886	0.629444	0.899551	0.252776	0.34879	0.342248
YGR147C	77.5732	39.7525	72.851	58.8893	45.5897	66.9378	60.3007	48.4672	59.8202	61.6772	57.2016	57.8399
YGR148C	945.388	1332.65	870.145	981.93	929.874	802.427	859.748	832.754	779.461	888.506	980.101	837.823
YGR150C	42.9722	24.6087	48.8139	44.9941	37.7294	51.5118	58.8209	88.7516	51.2744	105.155	84.0585	79.4015
YGR154C	0	1.89297	1.10941	1.32336	0	1.10186	34.7746	42.1727	27.4363	37.158	8.02218	6.84496
YGR158C	69.7601	60.5752	89.1223	97.9284	90.3935	104.125	50.3123	49.4113	40.4798	53.0829	33.1351	39.7008
YGR159C	524.038	603.859	578.371	632.564	553.365	708.769	426.914	395.605	473.164	463.085	398.667	344.986
YGR161C	220.442	162.796	328.754	244.821	320.7	303.011	169.434	202.366	156.522	146.104	88.9415	100.963
YGR168C	13.952	9.46487	11.4639	10.5868	10.2184	19.2825	48.4625	77.1069	33.2834	67.9966	30.6935	36.6205
YGR169C	21.7651	15.1438	21.0787	24.4821	21.2228	21.2107	28.4856	28.0102	30.5847	25.0248	25.8105	21.9039
YGR169C-A	59.1565	73.826	105.763	91.3116	115.546	81.5374	23.3064	31.1575	12.5937	31.8497	18.4859	11.9787
YGR171C	30.6944	24.6087	25.8862	17.8653	25.153	29.4747	46.9828	42.4874	35.5323	42.7191	43.9476	45.1767
YGR172C	124.452	109.793	139.046	119.102	148.56	121.755	91.006	87.4927	100.75	98.3297	71.502	75.6368
YGR174C	52.4596	83.2909	61.757	58.8893	60.5243	66.6623	21.4567	33.6752	32.3838	37.9163	31.3911	30.8023
YGR175C	806.426	849.946	839.451	799.307	912.581	819.781	640.371	540.063	663.869	616.52	601.315	529.115
YGR177C	36.2752	37.8595	50.6629	45.6558	46.3758	68.3151	66.9597	54.1322	71.5143	63.9522	52.3185	46.888
YGR178C	363.869	359.665	379.047	318.267	422.884	402.453	297.804	335.179	280.66	331.642	304.145	313.841
YGR179C	30.6944	18.9297	50.2931	38.3773	54.2361	42.146	27.7457	31.4722	20.6897	32.3553	20.2298	19.8504
YGR180C	743.921	821.551	555.813	553.163	496.771	565.252	308.902	352.488	329.236	343.269	574.109	549.65
YGR182C	0.558081	0	0.369802	0	0	0.550928	55.1215	71.4419	45.4273	76.0854	55.1089	64.6849
YGR183C	114.407	136.294	173.437	138.291	152.49	125.061	56.9712	79.6246	69.7152	75.0743	49.1794	63.3159
YGR184C	91.5252	85.1839	127.952	97.9284	99.0398	134.426	301.504	323.219	226.687	355.908	323.677	276.879
YGR185C	469.346	505.424	631.992	633.226	672.842	624.477	457.989	417.636	527.587	483.054	365.881	301.863
YGR187C	120.545	128.722	151.249	150.201	151.704	185.663	76.2083	80.2541	77.8112	100.099	84.756	70.1608
YGR188C	10.6035	3.78595	9.61486	9.92517	7.07427	9.91671	18.8671	22.0305	8.99551	25.5303	25.4617	19.1659
YGR189C	1242.85	1012.74	1568.33	1348.5	1424.29	1478.69	1294.43	1496.82	1412.75	1194.62	960.917	1078.08
YGR192C	8301.45	11361.6	6037.02	7969.25	7625.28	5752.52	11994.3	9798.86	13232.8	8572.38	12918.1	13154.3
YGR193C	211.513	174.154	200.803	183.946	216.158	215.688	112.833	107.005	87.2565	114.255	115.798	107.808
YGR194C	51.9015	30.2876	64.7154	49.6259	58.1662	64.1831	71.7689	70.183	69.2654	69.766	48.1331	57.4977
YGR196C	70.3182	68.1471	87.6431	77.4163	84.8912	88.9749	47.7226	47.523	26.9865	69.0077	56.504	45.1767
YGR197C	17.8586	24.6087	21.8183	18.527	18.0787	26.1691	31.8151	37.1372	34.6327	38.1691	31.0423	30.8023
YGR200C	116.639	100.328	151.989	130.351	139.127	167.207	132.44	155.158	155.622	183.009	121.379	128.685
YGR201C	16.1843	7.5719	9.61486	8.60181	4.71618	11.294	9.61852	11.33	13.0435	13.9027	16.7419	20.1926
YGR202C	135.055	124.936	106.133	81.3864	82.5332	86.7712	73.9886	86.5485	72.4139	83.1632	89.6391	77.0058
YGR204C-A	0	0	0	0	0	0	0.369943	1.25889	0.899551	1.0111	1.39516	0.684496
YGR207C	186.957	130.615	249.247	206.444	227.163	253.152	93.2256	104.802	104.348	109.957	77.7802	78.0325
YGR209C	248.346	255.552	213.376	222.986	168.996	181.806	99.8846	109.838	108.846	124.113	118.24	138.61
YGR210C	120.545	79.5049	105.394	91.3116	103.756	125.061	109.503	114.873	115.592	118.805	91.7319	98.2252
YGR213C	7.81313	0	4.43763	1.98503	3.14412	6.8866	7.7688	9.75638	8.54574	8.59437	6.62702	8.5562
YGR216C	39.0656	22.7157	34.3916	40.3624	35.3714	33.6066	60.6707	70.8124	58.9206	80.8882	60.3407	57.4977
YGR220C	126.126	83.2909	108.352	82.7098	95.1096	113.216	90.2661	95.9902	104.348	119.816	82.3145	87.9577
YGR221C	4.46464	3.78595	4.80743	5.9551	3.93015	7.713	33.6648	31.4722	23.8381	22.7498	19.1835	26.0108
YGR223C	22.8813	20.8227	27.7352	21.8354	34.5853	26.1691	48.8325	54.1322	41.8291	59.1495	44.6452	31.8291
YGR229C	183.05	183.619	244.809	197.18	238.953	244.061	147.607	195.128	126.387	225.981	165.675	145.798
YGR231C	264.53	189.297	195.995	206.444	157.206	214.036	139.099	158.62	138.531	154.699	177.883	183.787
YGR233C	47.4368	39.7525	40.6782	29.7755	24.3669	39.9423	90.636	117.391	61.6193	124.113	93.4758	78.0325
YGR235C	146.217	117.364	189.339	160.788	169.782	172.716	81.0175	103.543	87.7062	89.9881	55.4577	66.7384
YGR236C	0.558081	0	2.21881	1.32336	1.57206	1.37732	0.739886	0.629444	0	0.758327	0	0
YGR237C	78.1313	39.7525	60.2778	51.6109	70.7427	57.2965	66.9597	62.3149	48.5758	74.0632	54.0625	59.5511
YGR238C	16.7424	26.5016	25.5164	19.1887	26.725	18.1806	46.2429	53.5027	26.9865	61.6772	36.2742	33.8826
YGR239C	29.0202	32.1806	61.3872	58.8893	52.664	67.7642	39.214	38.0813	41.3794	40.1913	22.3226	19.1659
YGR240C	1882.96	1582.53	1659.3	1500.69	1770.14	1767.93	1733.18	1499.65	1678.56	1497.19	1859.75	1836.5
YGR241C	83.154	100.328	80.2471	58.8893	88.8214	94.7597	115.052	107.005	103.448	92.2631	106.032	108.493
YGR244C	401.818	280.16	378.677	294.447	291.617	388.404	179.052	188.204	188.456	197.165	209.274	228.622
YGR245C	111.616	83.2909	164.562	155.494	181.573	211.281	172.393	154.528	156.072	200.704	176.139	116.022
YGR246C	69.7601	85.1839	94.6694	64.1828	69.1706	99.1671	58.8209	66.4063	51.2744	72.5466	59.6431	47.9147
YGR250C	156.263	119.257	177.875	132.336	117.905	168.033	104.324	155.473	93.1035	135.488	143.702	141.691
YGR253C	253.369	206.334	335.041	324.884	283.757	356.726	197.18	233.209	197.901	273.756	149.98	146.14
YGR255C	69.202	58.6822	58.7986	41.024	54.2361	56.1947	88.7863	90.3252	95.8022	88.7242	92.4294	103.359
YGR257C	22.8813	13.2508	20.7089	15.2186	18.0787	23.139	51.4221	60.7413	61.1695	57.1273	38.0181	51.3372
YGR258C	39.0656	39.7525	47.7045	27.1288	37.7294	38.565	51.792	57.5941	34.1829	72.7994	59.2944	44.4922
YGR259C	0	0	0	0	0.78603	0	8.50869	5.97971	6.29686	8.08882	0.697581	0
YGR261C	104.919	85.1839	140.155	123.734	140.699	165.554	147.237	161.138	159.67	181.493	137.075	136.215
YGR262C	42.4141	35.9665	70.2624	54.9193	55.0221	72.4471	52.162	63.2591	48.5758	56.1162	29.996	36.2783
YGR263C	22.8813	30.2876	17.3807	13.8952	19.6508	18.7316	18.1272	22.66	23.8381	14.9138	25.8105	24.9841
YGR264C	380.611	388.06	499.973	492.288	484.195	562.222	532.348	509.22	541.08	591.242	438.778	387.425
YGR267C	156.821	128.722	142.744	113.147	157.206	150.679	96.1852	112.041	105.697	119.31	114.403	108.15
YGR268C	42.9722	37.8595	61.757	56.2426	64.4545	55.0928	38.1041	39.9697	39.1305	32.1025	19.1835	21.5616
YGR271C-A	50.2273	53.0033	85.4243	79.4014	108.472	112.389	17.7573	35.8783	13.943	42.7191	34.879	27.0376
YGR274C	60.8308	43.5384	44.3763	41.6857	45.5897	49.3081	66.5897	70.8124	41.8291	91.252	72.8972	53.0484
YGR276C	84.8282	79.5049	76.1793	58.2277	76.2449	92.005	44.3932	46.5788	38.6807	54.5995	52.6673	56.1287
YGR277C	65.8535	41.6454	63.606	56.2426	47.9478	62.5304	46.6128	54.1322	40.9296	52.3245	54.7601	49.2837
YGR279C	1092.72	984.347	1050.61	1073.24	1024.2	919.499	917.089	920.247	909.896	810.398	835.702	854.935
YGR280C	82.0378	75.719	121.665	112.485	128.909	153.434	44.3932	39.9697	35.5323	63.6994	49.877	29.4333
YGR282C	1521.89	1485.99	1354.59	1349.16	1353.54	1191.93	1265.58	1394.85	1326.39	1197.4	1295.41	1368.65
YGR283C	37.3914	26.5016	49.5535	29.1138	51.878	58.1229	48.0926	34.3047	33.7332	48.5329	31.0423	26.3531
YGR284C	244.997	170.368	235.194	198.503	238.167	227.809	143.538	159.249	176.312	152.929	167.419	179.338
YGR285C	998.964	959.738	770.668	839.008	818.257	856.418	491.284	475.545	501.95	461.315	592.246	606.463
YGR286C	54.1338	32.1806	22.5579	17.2036	18.8647	26.72	19.9769	19.8275	21.5892	18.9582	34.879	39.0163
YGR287C	25.6717	17.0368	9.98466	7.94014	12.5765	14.5996	19.9769	23.9189	19.7901	27.2998	20.9274	22.9306
YGR289C	3.34848	1.89297	1.47921	0	0	1.37732	41.0637	50.6702	32.8336	49.544	8.71976	13.3477
YGL263W	0	0	0	0	0	0	0	0	0.899551	0.758327	0	0
YGL258W	189.747	56.7892	0.369802	0	0	0.275464	0.369943	0.629444	0.449776	0	44.6452	118.418
YGL256W	2327.75	1847.54	7.02624	8.60181	9.43236	8.53939	89.5262	107.32	72.8636	93.7797	1177.17	2039.8
YGL255W	1407.48	1480.31	159.755	46.9791	54.2361	78.2318	64.74	172.468	92.204	77.6021	1481.66	1682.49
YGL254W	16.1843	15.1438	40.6782	31.7605	58.1662	48.2062	41.4336	33.0458	40.9296	31.5969	12.5565	14.0322
YGL253W	1385.71	1379.98	1023.24	956.786	918.869	1047.04	706.961	748.409	864.918	696.397	1192.17	1165.7
YGL250W	26.2298	13.2508	36.6104	26.4671	18.8647	24.5163	12.5781	20.4569	18.4408	20.9804	13.254	15.0589
YGL248W	95.9899	32.1806	94.6694	58.2277	59.7383	71.8961	99.8846	129.036	106.147	92.2631	84.4073	88.3
YGL247W	13.952	0	11.0941	8.60181	14.1485	15.426	22.5665	21.4011	30.5847	21.9915	16.3931	16.7702
YGL245W	1368.97	1306.15	1218.5	1264.47	1206.56	1337.1	941.505	882.165	974.214	939.061	1098.34	1127.71
YGL244W	185.283	155.224	251.466	220.339	253.102	238.276	94.3355	101.655	66.5668	129.168	118.938	99.2519
YGL243W	20.649	24.6087	24.4069	19.8503	17.2927	23.9654	49.9423	57.9088	51.7242	54.5995	39.0645	32.5136
YGL241W	69.202	70.0401	78.3981	64.1828	87.2493	96.137	93.9655	126.203	82.7587	128.41	99.754	77.0058
YGL240W	5.02273	9.46487	16.2713	7.27846	9.43236	13.4977	12.5781	11.33	10.7946	8.84714	6.97581	5.81822
YGL238W	212.629	160.903	264.039	220.339	257.818	287.034	324.07	371.372	311.694	401.913	283.567	293.991
[truncated: 3,648 more rows]

## Sheet: dcp2 vs dcp2-EE RNA-Seq
Gene_ID	dcp2 AVG	dcp2-EE AVG
YAL067C	1.08222	1.93854
YAL063C-A	2.36872	2.89387
YAL063C	143.443	109.511
YAL054C	22.928	26.4685
YAL049C	89.9201	81.9724
YAL047C	32.4221	30.9312
YAL046C	20.5869	28.8437
YAL044C	136.427	135.234
YAL043C	170.321	161.448
YAL040C	270.793	233.745
YAL039C	65.8244	53.922
YAL037C-A	0	0
YAL036C	126.972	133.452
YAL034C-B	0	0
YAL034C	57.7824	48.8908
YAL032C	29.09	22.8015
YAL031C	57.7464	46.7517
YAL029C	213.182	188.174
YAL026C-A	11.7055	10.3525
YAL026C	172.98	173.595
YAL025C	84.3325	95.6056
YAL024C	47.6172	40.9325
YAL023C	482.788	475.22
YAL022C	110.761	123.48
YAL021C	217.525	226.663
YAL020C	33.67	27.9721
YAL018C	0.157361	1.18021
YAL015C	43.1366	40.9378
YAL014C	54.8477	50.7047
YAL010C	40.0473	36.5682
YAL007C	83.3884	92.3878
YAL005C	5228.88	5411.67
YAL001C	80.575	70.652
YAR002C-A	132.43	140.773
YAR007C	147.023	162.893
YAR014C	125.964	105.04
YAR018C	76.3484	84.3233
YAR019C	61.733	53.2882
YAR023C	12.4178	12.8542
YAR047C	0	0.126388
YAL066W	0	0
YAL064W-B	7.31873	6.30812
YAL062W	32.6042	45.7608
YAL061W	25.3077	21.2978
YAL060W	188.755	189.526
YAL059W	40.1384	50.8032
YAL058W	56.264	52.2083
YAL056W	100.135	92.3379
YAL055W	9.26228	12.6293
YAL053W	526.954	512.948
YAL051W	83.0375	89.1391
YAL047W-A	0.342332	0.252776
YAL044W-A	38.4627	35.0664
YAL042W	169.811	192.964
YAL041W	106.534	97.0309
YAL038W	6896.51	6879.07
YAL037W	5.63468	3.02026
YAL035W	627.401	596.368
YAL034W-A	12.0009	11.4491
YAL033W	34.8737	33.1113
YAL030W	25.7219	30.0109
YAL028W	32.0881	20.2719
YAL027W	18.5881	21.5785
YAL019W	195.113	182.879
YAL017W	249.289	220.116
YAL016W	274.44	282.641
YAL013W	48.705	44.2014
YAL012W	528.536	523.014
YAL011W	35.3624	31.3976
YAL009W	26.47	23.4892
YAL008W	17.5721	16.1421
YAL004W	0	0
YAL003W	981.765	972.97
YAL002W	139.409	99.6257
YAR002W	100.116	97.0102
YAR003W	33.4574	36.7243
YAR008W	24.2973	19.9895
YAR015W	93.0702	106.578
YAR019W-A	0.369943	0.477663
YAR027W	81.4089	74.1921
YAR028W	28.8111	30.7675
YAR029W	2.39633	1.71365
YAR031W	17.6908	20.638
YAR033W	19.3363	18.8834
YAR035W	14.4525	15.0473
YAR042W	167.878	149.04
YAR050W	206.459	164.699
YAR053W	1.99877	1.33449
YAR071W	60.5955	59.2172
YBL113C	1819.06	1404.99
YBL107C	33.9019	27.2381
YBL106C	36.8974	41.6979
YBL105C	163.778	134.923
YBL104C	89.2659	79.9519
YBL103C	64.1127	55.1081
YBL101C	109.24	85.8364
YBL093C	41.6983	36.1333
YBL091C-A	17.8123	16.8037
YBL091C	162.194	145.6
YBL088C	202.997	174.529
YBL087C	740.948	803.967
YBL086C	25.4983	19.7385
YBL084C	90.6266	77.8021
YBL080C	36.9194	35.5423
YBL078C	30.9451	26.3943
YBL076C	1216.4	1300.98
YBL075C	75.5118	73.1626
YBL074C	32.9578	30.0892
YBL072C	1962.84	2019.31
YBL071C	0.527304	0.351276
YBL070C	0.499693	0.126388
YBL067C	72.9222	63.6259
YBL066C	109.491	91.5701
YBL064C	138.349	139.97
YBL061C	90.6876	86.3366
YBL059C-A	23.5767	23.9799
YBL057C	42.6921	44.679
YBL055C	44.1719	45.1513
YBL052C	62.782	59.3869
YBL051C	187.882	157.118
YBL047C	542.58	438.997
YBL045C	515.35	502.132
YBL042C	386.27	404.379
YBL040C	109.883	114.132
YBL039C	308.679	364.204
YBL036C	53.4066	61.8138
YBL035C	83.5347	77.5375
YBL034C	80.5281	70.9641
YBL033C	57.4869	66.2148
YBL030C	774.119	775.126
YBL029C-A	25.8516	23.2346
YBL028C	26.9338	39.0366
YBL023C	107.44	121.061
YBL022C	304.565	274.326
YBL021C	17.6825	16.0993
YBL018C	30.6746	32.2432
YBL017C	361.809	365.792
YBL014C	65.1011	64.7877
YBL010C	33.162	28.067
YBL007C	463.733	416.879
YBL006C	52.49	52.4741
YBL003C	485.725	472.974
YBL001C	85.7183	76.2997
YBR001C	115.347	124.077
YBR002C	35.8621	43.4264
YBR004C	80.5528	78.03
YBR007C	73.9768	59.9737
YBR008C	80.6192	81.3683
YBR009C	604.464	512.539
YBR011C	497.878	554.923
YBR012C	0	0.126388
YBR013C	0	0
YBR014C	53.3873	48.5508
YBR015C	199.276	206.796
YBR017C	251.772	277.362
YBR018C	2.36872	2.3177
YBR019C	2.50677	2.00915
YBR023C	337.368	331.396
YBR025C	566.424	535.223
YBR026C	110.653	111.379
YBR028C	70.6805	71.3949
YBR029C	166.031	188.917
YBR034C	137.43	157.188
YBR035C	154.039	151.172
YBR036C	201.454	220.998
YBR037C	61.5314	61.5943
YBR042C	29.609	38.8432
YBR043C	255.234	244.474
YBR044C	47.043	47.0044
YBR045C	13.2046	11.9546
YBR046C	29.747	31.3715
YBR049C	127.08	116.801
YBR050C	4.23774	3.34364
YBR052C	96.7474	109.232
YBR053C	98.6883	99.8483
YBR055C	92.1258	82.4726
YBR057C	48.7906	46.0212
YBR058C	143.371	139.141
YBR058C-A	30.2909	27.5484
YBR059C	254.712	219.17
YBR060C	66.6913	63.7244
YBR061C	68.1186	80.3477
YBR062C	25.9068	22.6454
YBR063C	59.5989	48.3205
YBR065C	68.2207	60.5594
YBR066C	18.6819	20.679
YBR067C	243.948	221.99
YBR068C	812.172	848.777
YBR069C	371.767	418.564
YBR070C	28.016	29.3475
YBR072C-A	0.184972	0.224888
YBR076C-A	13.7595	12.0959
YBR077C	53.3237	58.5277
YBR079C	709.818	686.984
YBR080C	186.005	179.981
YBR081C	121.997	106.219
YBR082C	360.865	352.047
YBR084C-A	985.533	1010.27
YBR085C-A	131.381	153.207
YBR086C	463.015	459.908
YBR088C	182.891	197.705
YBR089C-A	52.8959	52.2047
YBR091C	27.3231	25.935
YBR092C	525.158	549.903
YBR093C	152.512	160.612
YBR095C	51.1207	50.125
YBR099C	2.5813	1.13749
YBR101C	106.479	117.139
YBR102C	97.1616	89.0797
YBR103C-A	0	0.126388
YBR105C	47.01	47.2922
YBR107C	14.3144	12.3914
YBR109C	221.075	217.524
YBR111C	137.079	136.372
YBR112C	418.214	339.718
YBR115C	517.631	544.726
YBR120C	32.6982	33.3213
YBR121C	716.904	810.957
YBR122C	66.2992	71.1867
YBR123C	57.6719	55.6303
YBR125C	44.8952	48.0785
YBR126C	380.817	365.868
YBR127C	651.707	650.68
YBR128C	5.92179	3.93286
YBR129C	51.6563	54.2679
YBR130C	75.1585	74.722
YBR132C	70.3768	65.0477
YBR133C	147.714	132.049
YBR138C	55.8415	51.5117
YBR140C	434.541	386.533
YBR141C	20.5316	19.7533
YBR143C	378.2	393.171
YBR144C	0.184972	0.224888
YBR150C	91.5516	67.5332
YBR154C	113.464	114.45
YBR156C	43.5231	36.5795
YBR157C	11.1948	7.69839
YBR162C	659.091	654.431
YBR164C	68.759	76.7608
YBR166C	104.798	117.825
YBR167C	14.8583	18.207
YBR169C	158.494	157.971
YBR170C	80.9781	83.3662
YBR172C	162.754	140.406
YBR173C	81.384	86.7021
YBR174C	0.157361	0.126388
YBR177C	214.957	237.263
YBR179C	86.9605	92.7895
YBR181C	1829.7	1964.68
YBR182C	41.4083	37.0643
YBR182C-A	0.499693	1.02594
YBR185C	56.2501	55.9293
YBR188C	25.1007	29.9516
YBR193C	34.4651	35.4865
YBR195C	29.932	33.2543
YBR196C	2306.59	2456.09
YBR197C	35.3734	32.2711
YBR198C	140.773	124.442
YBR201C-A	2.5813	2.5147
YBR204C	46.698	36.57
YBR208C	198.268	173.767
YBR211C	24.093	25.7084
YBR216C	74.1618	75.8743
YBR218C	654.462	659.373
YBR221C	381.295	402.934
YBR222C	144.298	138.725
YBR223C	52.0952	40.6032
YBR229C	157.177	152.481
YBR230C	84.2827	87.3715
YBR231C	16.2304	16.8019
YBR234C	180.249	211.512
YBR236C	79.2858	86.1319
YBR238C	90.1825	93.5105
YBR239C	49.5554	41.473
YBR240C	9.60462	11.633
YBR241C	48.5311	48.374
YBR243C	53.7213	56.9553
YBR245C	171.188	174.652
YBR247C	124.639	119.44
YBR248C	132.753	146.631
YBR249C	522.38	565.565
YBR254C	24.0571	26.4258
YBR255C-A	12.0009	14.6663
YBR256C	127.93	128.877
YBR258C	9.60462	12.9509
YBR260C	83.9846	78.9984
YBR261C	54.5992	60.3862
YBR262C	37.1899	50.1398
YBR264C	22.9087	21.5358
YBR269C	47.1231	57.0686
YBR270C	32.3117	24.2884
YBR272C	66.4511	72.7312
YBR273C	56.6642	49.3388
YBR275C	126.395	120.624
YBR276C	121.608	102.226
YBR277C	0.712275	0.856827
YBR280C	38.7305	41.1924
YBR281C	87.557	91.693
YBR283C	293.6	326.041
YBR288C	90.279	97.0885
YBR291C	60.3277	60.1986
YBR292C	1.36933	3.59642
YBR296C	4.58007	4.42536
YBR298C	74.8409	65.4624
YBL102W	90.3259	81.0224
YBL100W-C	0	0.252776
YBL099W	971.146	941.165
YBL098W	39.3626	33.1837
YBL097W	32.9688	29.37
YBL095W	25.2691	24.9204
YBL092W	1123.41	1114.06
YBL090W	47.7719	47.2311
YBL089W	50.0108	55.2843
YBL085W	124.529	106.534
YBL081W	90.1163	78.1938
YBL079W	328.995	309.052
YBL071W-A	29.1093	32.7897
YBL068W	85.8287	95.3802
YBL063W	32.7203	37.0963
YBL060W	66.8375	54.8945
YBL059W	19.2755	21.3257
YBL058W	193.467	205.689
YBL056W	194.122	186.349
YBL054W	77.0385	66.1478
YBL050W	99.707	110.807
YBL048W	3.42332	3.77858
YBL046W	33.6976	33.1261
YBL043W	34.5009	33.6631
YBL041W	144.55	161.746
YBL039W-B	5.92179	5.57768
YBL038W	71.8925	75.116
YBL037W	143.125	144.476
YBL032W	106.543	100.227
YBL031W	19.6234	15.5789
YBL029W	18.4776	14.1869
YBL027W	1167.52	1136.89
YBL026W	33.543	34.6018
YBL025W	14.6099	16.8725
YBL024W	244.028	268.939
YBL020W	51.648	55.1449
YBL019W	34.8268	32.3084
YBL016W	82.9217	78.9035
YBL015W	70.6224	63.7986
YBL011W	155.203	144.97
YBL009W	70.2637	70.6087
YBL008W	51.5375	53.201
YBL005W	61.3491	52.5524
YBL004W	438.387	424.996
YBL002W	358.126	356.022
YBR003W	96.8882	93.0702
YBR005W	41.712	43.6234
YBR006W	33.1068	41.67
YBR010W	893.097	921.524
YBR016W	48.4372	52.7696
YBR020W	18.5246	13.7816
YBR021W	143.658	146.733
YBR022W	24.4354	25.2752
YBR024W	28.9602	27.5632
YBR030W	79.5812	77.1939
YBR031W	2693.14	2694.13
YBR033W	32.9522	26.4797
YBR038W	209.09	220.903
YBR039W	289.035	307.807
YBR041W	113.069	114.847
YBR047W	4.49724	4.14469
YBR048W	1095.03	1101.22
YBR051W	0.527304	0.224888
YBR054W	319.365	299.926
YBR056W	133.747	117.225
YBR056W-A	23.8003	22.6341
YBR071W	143.169	137.401
YBR072W	71.3457	58.444
YBR073W	262.963	235.907
YBR074W	176.478	171.125
YBR076W	1.5543	1.1096
YBR078W	1605.95	1595.61
YBR083W	110.794	104.592
YBR084W	349.96	365.089
YBR085W	2.39633	4.14469
YBR087W	73.1128	71.7444
YBR094W	81.5191	74.3707
YBR096W	95.9965	101.045
YBR097W	81.0057	75.2946
YBR098W	31.3399	27.1212
YBR103W	56.424	61.167
YBR104W	31.2268	38.9583
YBR106W	184.768	203.378
YBR108W	128.192	93.5959
YBR110W	65.3054	71.2163
YBR111W-A	18.8476	22.1677
YBR114W	69.8578	64.4679
YBR118W	11934.1	12325.1
YBR119W	23.8252	24.74
YBR131W	33.2366	39.9564
YBR135W	63.1465	59.47
YBR136W	105.289	100.484
YBR137W	35.8538	32.7914
YBR139W	237.418	233.589
YBR141W-A	0.629444	1.43299
YBR142W	120.719	114.443
YBR145W	36.3894	38.2724
YBR146W	95.0026	93.9122
YBR147W	11.0016	10.9156
YBR148W	6.92948	6.34906
YBR149W	306.55	318.765
YBR151W	90.9168	78.0247
YBR152W	13.3344	12.319
YBR153W	32.1626	33.3213
YBR155W	38.7415	36.9195
YBR158W	234.652	251.491
YBR159W	155.353	148.163
YBR160W	93.8018	92.57
YBR161W	45.2624	47.5675
YBR162W-A	27.5909	31.1579
YBR163W	54.555	47.917
YBR165W	32.2372	34.0256
YBR168W	30.4151	24.4018
YBR171W	52.4541	53.528
YBR175W	41.3973	44.2981
YBR176W	20.0126	27.0168
YBR178W	0.869636	1.84004
YBR183W	99.3729	92.6667
YBR184W	16.0647	13.3449
YBR186W	0.869636	0.505551
YBR187W	77.1628	88.02
YBR189W	1147.49	1170.77
YBR192W	42.1731	40.7111
YBR194W	14.8777	20.6101
YBR199W	162.42	175.206
YBR200W	85.8397	73.1738
YBR201W	18.3672	16.5064
YBR202W	140.356	150.555
YBR203W	119.206	98.4621
YBR205W	123.576	133.991
YBR207W	97.6281	93.5122
YBR210W	23.0191	26.0875
YBR212W	137.64	133.943
YBR213W	11.3798	16.0175
YBR214W	156.89	122.774
YBR215W	59.1683	53.6751
YBR217W	18.831	20.9727
YBR225W	75.9729	71.0567
YBR228W	19.9132	23.4725
YBR230W-A	19.0243	15.1719
YBR233W	37.3059	33.3658
YBR233W-A	7.31873	8.93438
YBR235W	109.328	113.682
YBR237W	68.4526	63.4384
YBR242W	43.1256	53.6211
YBR244W	13.6574	14.4842
YBR246W	84.5312	84.2842
YBR250W	2.89602	3.21726
YBR251W	71.4424	73.588
YBR252W	54.5716	75.6417
YBR253W	33.5486	28.5447
YBR255W	44.3126	40.005
YBR257W	24.6782	24.4854
YBR259W	46.0961	52.7382
YBR263W	111.846	128.132
YBR265W	78.3775	75.5171
YBR267W	60.8137	64.5012
YBR268W	27.036	29.2508
YBR271W	36.3535	37.8636
YBR274W	58.9501	61.4495
YBR278W	26.5832	23.3201
YBR279W	102.28	93.8825
YBR282W	47.4462	51.1919
YBR284W	27.566	24.9073
YBR285W	1.44386	2.6132
YBR286W	541.633	582.447
YBR287W	170.768	175.152
YBR289W	148.106	139.783
YBR290W	56.8326	49.6568
YBR293W	76.7072	75.0044
YBR294W	4.34818	4.29897
YBR295W	112.668	82.9295
YBR297W	37.7973	38.5792
YBR299W	28.2037	27.0464
YCL064C	21.1887	23.2216
YCL061C	175.409	169.066
YCL059C	166.923	179.345
YCL057C-A	156.716	156.216
YCL056C	30.97	28.6301
YCL052C	177.019	169.314
YCL050C	387.114	387.039
YCL049C	193.997	171.719
YCL047C	47.7277	51.504
YCL045C	437.448	431.493
YCL044C	117.202	109.715
YCL043C	1642.5	1609.3
YCL041C	130.219	129.164
YCL038C	85.8011	85.8975
YCL037C	550.556	509.8
YCL035C	203.16	223.73
YCL033C	93.1088	94.6385
YCL031C	176.494	183.903
YCL030C	654.163	693.845
YCL029C	69.579	66.912
YCL026C-B	17.1745	19.6993
YCL026C-A	0.369943	0.449776
YCL025C	866.686	868.969
YCL017C	302.031	300.604
YCL016C	80.2631	78.1416
YCL012C	66.705	54.4145
YCL011C	331.902	321.803
YCL010C	129.49	125.495
YCL009C	654.487	615.05
YCL008C	118.775	126.534
YCL002C	67.9722	65.174
YCR002C	271.701	281.084
YCR004C	289.378	280.009
YCR005C	692.532	665.182
YCR007C	30.4234	30.3456
YCR009C	237.598	237.888
YCR010C	1.18436	0.702551
YCR011C	427.879	442.02
YCR014C	69.1896	61.9983
YCR015C	64.1403	71.3765
YCR017C	549.639	538.528
YCR020C	38.5675	40.6981
YCR020C-A	51.4022	59.3549
YCR021C	40.6794	29.5855
YCR022C	2.89602	2.45893
YCR023C	174.33	181.689
YCR024C	100.988	99.1736
YCR024C-B	497.522	385.626
YCR024C-A	156.876	118.194
YCR025C	2.45155	3.56853
YCR026C	232.101	222.658
YCR027C	53.8151	57.9943
YCR028C	127.538	138.147
YCR028C-A	146.894	162.476
YCR030C	477.28	422.708
YCR031C	1724.53	1832.23
YCR035C	146.596	139.538
YCR037C	204.513	216.969
YCR038C	64.7284	57.9776
YCR042C	323.62	294.073
YCR043C	77.4167	85.9479
YCR044C	85.699	78.1137
YCR045C	0.842026	1.4051
YCR046C	130.089	131.545
YCR047C	67.884	79.9798
YCR054C	115.501	116.589
YCR057C	387.415	424.536
YCR059C	102.148	95.7297
YCR064C	1.42455	1.62999
YCR067C	399.035	390.161
YCR071C	85.1081	93.7763
YCR072C	133.521	151.612
YCR073C	160.935	131.127
YCR075C	59.8723	61.0608
YCR076C	61.7523	58.1094
YCR077C	736.691	711.476
YCR084C	714.616	621.422
YCR087C-A	45.0029	62.7839
YCR090C	75.2054	85.3771
YCR092C	101.281	106.651
YCR095C	64.5572	57.303
YCR098C	45.2292	44.9116
YCR102C	11.8739	12.9509
YCL063W	82.5517	92.8673
YCL058W-A	19.328	27.619
YCL057W	387.122	399.214
YCL055W	61.0842	57.513
YCL054W	249.966	254.967
YCL051W	138.272	119.834
YCL048W	4.1356	5.24125
YCL040W	1458.54	1457.69
YCL039W	178.794	165.164
YCL036W	90.1632	98.9262
YCL034W	161.619	165.597
YCL032W	83.7361	73.9915
YCL028W	285.102	292.636
YCL027W	13.351	9.42688
YCL024W	238.087	204.946
YCL021W-A	4.93071	6.53301
YCL018W	292.29	256.333
YCL014W	331.162	288.129
YCL005W-A	115.112	108.587
YCL005W	67.1468	73.1976
YCL004W	104.817	88.1968
YCL001W	123.819	133.632
YCR003W	105.123	115.182
YCR008W	238.36	213.951
YCR012W	8716.83	9244.11
YCR016W	64.8443	68.323
YCR019W	65.5566	63.124
YCR020W-B	39.0782	39.6947
YCR032W	240.135	231.854
YCR033W	177.75	144.751
YCR034W	397.539	451.748
YCR036W	239.315	267.192
YCR045W-A	21.9369	18.8538
YCR048W	92.5844	94.8058
YCR051W	112.07	125.995
YCR052W	196.72	187.714
YCR053W	1351.96	1382.63
YCR061W	152.374	139.563
YCR063W	56.7913	45.9132
YCR065W	232.085	216.214
YCR066W	54.3866	46.4989
YCR068W	104.646	94.7613
YCR069W	154.933	132.579
YCR073W-A	160.076	151.724
YCR075W-A	26.2132	28.3067
YCR079W	70.098	61.9384
YCR081W	171.715	153.24
YCR082W	143.227	147.759
YCR083W	56.8961	65.7781
YCR085W	0.869636	0.379163
YCR086W	44.1829	41.7407
YCR088W	585.203	559.811
YCR089W	311.564	251.053
YCR091W	78.6785	65.5461
YCR093W	971.047	851.658
YCR094W	153.232	159.019
YCR095W-A	5.9494	5.66135
YCR097W	0	0
YCR105W	5.26474	5.85835
YCR106W	149.083	153.044
YCR107W	73.7669	66.4047
YDL243C	39.197	33.548
YDL239C	23.2095	19.8465
YDL238C	40.685	40.4192
YDL235C	53.8537	63.0925
YDL234C	117.867	96.3972
YDL231C	243.519	215.938
YDL227C	37.2397	49.2029
YDL226C	150.389	153.772
YDL224C	175.224	156.828
YDL222C	26.5556	29.4478
YDL220C	68.4306	58.3028
YDL217C	42.4326	51.701
YDL216C	22.8368	24.1472
YDL215C	293.558	272.794
YDL214C	11.3549	7.82478
YDL213C	64.4633	70.226
YDL211C	19.2175	22.3796
YDL209C	23.955	26.2845
YDL205C	58.7182	60.0556
YDL203C	97.0401	98.5826
YDL200C	15.924	18.5844
YDL199C	23.5657	21.6343
YDL198C	122.215	129.491
YDL197C	97.6337	78.4151
YDL190C	194.351	188.91
YDL188C	110.43	124.897
YDL187C	4.19082	4.29897
YDL184C	114.226	113.992
YDL183C	13.2405	13.6422
YDL177C	14.6651	12.6423
YDL175C	38.0485	40.6572
YDL174C	301.659	294.231
YDL171C	705.958	672.946
YDL169C	6.52362	7.41773
YDL167C	119.148	116.911
YDL166C	36.5854	33.2264
YDL164C	84.81	89.4625
YDL160C-A	7.07854	8.10544
YDL160C	435.311	468.704
YDL157C	30.6166	37.806
YDL153C	79.3686	87.0154
YDL148C	133.087	129.554
YDL145C	590.589	587.027
YDL144C	56.3937	52.1935
YDL142C	32.7286	32.6912
YDL140C	660.179	578.365
YDL139C	9.65984	11.8561
YDL135C	63.3618	61.024
YDL134C	154.085	156.053
YDL133C-A	114.226	113.992
YDL126C	951.253	962.341
YDL125C	218.085	206.869
YDL121C	46.0216	50.7848
YDL119C	38.631	40.0679
YDL115C	34.5976	39.3879
YDL113C	69.0627	63.7749
YDL111C	96.9573	102.296
YDL110C	66.1667	61.6037
YDL109C	64.0575	58.933
YDL106C	84.2468	67.1351
YDL104C	16.3215	15.8466
YDL103C	106.079	117.814
YDL101C	65.3633	61.1652
YDL100C	292.708	295.125
YDL098C	7.99509	11.4491
YDL097C	263.093	271.551
YDL094C	3.47855	2.03704
YDL091C	37.477	38.2522
YDL090C	40.2931	32.0723
YDL088C	116.793	105.417
YDL087C	25.8599	20.8629
YDL086C-A	1.84141	1.62999
YDL085C-A	9.61292	10.8171
YDL083C	742.221	786.354
YDL081C	440.888	519.349
YDL080C	77.4057	65.5811
YDL079C	8.92825	12.3338
YDL078C	161.793	157.818
YDL077C	90.1603	81.1974
YDL076C	44.2823	40.5308
YDL074C	114.082	115.101
YDL072C	220.224	243.773
YDL069C	10.4466	12.9806
YDL067C	52.5948	58.444
YDL065C	37.5322	40.3266
YDL063C	92.9984	105.237
YDL061C	221.688	228.533
YDL059C	8.63284	7.769
YDL055C	1441.93	1429.49
YDL054C	46.6234	55.9477
YDL053C	60.1179	64.2152
YDL052C	88.7469	95.5772
YDL049C	12.4261	12.1813
YDL048C	32.6816	25.5968
YDL045C	46.6621	34.6724
YDL044C	33.6065	30.199
YDL043C	31.4697	32.5873
YDL042C	49.754	56.013
YDL040C	294.58	294.863
YDL039C	12.2218	10.6777
YDL036C	37.6317	34.9792
YDL035C	74.9127	77.8169
YDL033C	30.1446	27.7341
YDL028C	59.828	61.0204
YDL027C	64.0712	57.1896
YDL025C	90.9996	74.878
YDL024C	6.7169	6.16868
YDL020C	163.811	169.056
YDL019C	179.241	162.744
YDL018C	39.2026	47.1753
YDL015C	215.131	210.095
YDL012C	44.633	41.079
YDL009C	1.12914	0.604051
YDL005C	79.7219	75.3076
YDL002C	26.5087	29.7807
YDR001C	366.276	343.524
YDR005C	77.5934	66.7969
YDR006C	133.004	124.877
YDR008C	3.1086	3.94769
YDR010C	1.44386	1.84004
YDR016C	18.2015	23.491
YDR017C	125.815	112.355
YDR018C	15.2034	13.7407
YDR019C	162.378	184.005
YDR020C	23.5767	20.231
YDR022C	19.1154	22.3665
YDR026C	63.7538	54.8126
YDR027C	75.7271	69.9809
YDR028C	282.048	243.182
YDR030C	23.1239	23.1919
YDR032C	192.46	202.873
YDR034C	101.664	96.8303
YDR036C	68.875	75.4762
YDR038C	402.481	436.665
YDR042C	1.36933	1.84004
YDR045C	23.3724	29.2211
YDR046C	348.209	363.048
YDR048C	0.369943	0.604051
YDR050C	2493.83	2608.93
YDR051C	46.1707	48.4801
YDR052C	87.6591	81.8798
YDR054C	102.965	97.0493
YDR056C	48.6498	53.4538
YDR058C	13.7678	18.8389
YDR059C	41.6954	40.6032
YDR066C	12.0838	9.10349
YDR067C	33.7998	33.1949
YDR069C	84.1999	81.9094
YDR070C	2.21136	2.3177
YDR071C	138.683	156.913
YDR072C	158.083	151.756
YDR078C	14.5077	16.6067
YDR079C-A	9.15184	13.0233
YDR081C	70.3382	69.9139
YDR084C	45.5908	46.6288
YDR085C	78.8054	68.8767
YDR086C	89.3405	93.6683
YDR087C	69.4603	85.8548
YDR088C	19.0629	20.0304
YDR090C	37.3252	39.4787
YDR091C	316.801	354.036
YDR097C	109.822	100.665
YDR098C	132.333	146.014
YDR101C	237.97	266.887
YDR104C	43.1449	33.5444
YDR105C	68.3864	73.4504
YDR107C	30.9231	32.5796
YDR109C	57.9038	52.2047
YDR111C	68.8198	78.357
YDR113C	42.1924	38.7596
YDR116C	80.7323	81.8234
YDR117C	62.8731	59.9981
YDR120C	119.935	139.801
YDR123C	39.5339	38.8468
YDR125C	21.023	20.1716
YDR129C	411.508	442.416
YDR130C	40.9252	32.2526
YDR131C	45.7289	37.2411
YDR132C	20.2086	19.6957
YDR133C	406.006	339.734
YDR135C	453.008	439.027
YDR139C	26.1194	21.1008
YDR141C	275.392	259.544
YDR142C	32.1709	34.8564
YDR143C	100.113	100.149
YDR144C	97.8269	101.984
YDR146C	131.574	111.376
YDR148C	203.433	212.103
YDR151C	58.4284	56.6449
YDR153C	103.368	90.0351
YDR162C	31.108	31.5928
YDR164C	86.8227	90.6557
YDR166C	102.716	99.5646
YDR169C	86.3533	69.7406
YDR170C	575.623	528.007
YDR173C	31.3951	25.398
YDR175C	72.5247	72.3651
YDR179C	11.0402	12.1777
YDR181C	41.8887	40.5551
YDR185C	7.16137	10.0737
YDR186C	170.973	151.029
YDR190C	200.808	207.749
YDR192C	33.3194	41.3354
YDR194C	248.11	237.758
YDR196C	43.0704	43.8299
YDR198C	35.1332	39.5013
YDR200C	52.9428	44.6683
YDR202C	43.4706	44.8968
YDR207C	61.6115	57.106
YDR215C	0.842026	0.828939
YDR217C	60.6921	61.4257
YDR218C	2.3135	2.36043
YDR219C	63.1216	53.2366
YDR224C	580.347	505.125
YDR228C	91.6097	74.8448
YDR231C	54.4419	55.4612
YDR233C	479.202	454.614
YDR236C	36.0221	40.8281
YDR238C	517.695	512.421
YDR239C	51.797	49.9838
YDR240C	25.813	27.0559
YDR243C	40.8783	35.9363
YDR248C	36.3921	32.8994
YDR249C	24.1869	29.5332
YDR253C	2.44325	1.81215
YDR255C	34.9206	32.8288
YDR256C	4.21013	4.83241
YDR257C	89.8815	84.2046
YDR258C	477.89	471.659
YDR259C	14.8058	10.4938
YDR260C	22.9087	28.3809
YDR261C	107.578	91.8395
YDR263C	20.1341	14.7221
YDR264C	200.537	199.468
YDR266C	157.189	148.778
YDR267C	40.8121	46.3428
YDR271C	1.34172	2.06493
YDR274C	0	0
YDR276C	114.563	105.926
YDR277C	81.8229	70.906
YDR281C	0.554915	0.379163
YDR282C	23.0687	21.2255
YDR283C	159.667	146.736
YDR284C	96.811	93.3746
YDR286C	11.5012	13.0233
YDR289C	47.9016	40.8488
YDR292C	98.0588	97.6593
YDR293C	519.74	447
YDR294C	180.657	181.194
YDR295C	49.7873	42.2836
YDR298C	171.591	177.07
YDR300C	61.2636	71.7925
YDR303C	104.881	100.3
YDR304C	143.36	164.111
YDR305C	26.3706	29.7694
YDR306C	55.1458	51.8665
YDR308C	36.6406	31.2285
YDR309C	200.706	169.392
YDR310C	130.208	106.257
YDR313C	35.2077	34.546
YDR314C	35.9669	33.6577
YDR315C	21.1252	15.0864
YDR319C	35.4093	42.3002
YDR320C	108.762	103.922
YDR320C-A	21.1335	25.3998
YDR322C-A	71.84	67.6852
YDR323C	15.3304	16.3094
YDR324C	177.717	176.472
YDR326C	173.93	148.117
YDR328C	127.027	136.376
YDR329C	64.9823	58.7751
YDR333C	99.0223	108.948
YDR338C	45.4611	42.1163
YDR339C	68.1711	68.9247
YDR341C	411.975	466.699
YDR342C	2490.16	2245.83
YDR343C	2413.3	2175.95
YDR345C	1111.25	1149.21
YDR346C	164.184	174.697
YDR348C	86.0027	84.4871
YDR349C	221.031	216.989
YDR350C	107.539	101.243
YDR357C	33.9598	32.7748
YDR359C	110.419	93.6891
YDR361C	72.2128	87.353
YDR362C	42.7556	40.3302
YDR364C	72.025	59.9684
YDR365C	125.876	124.349
YDR366C	223.341	201.096
YDR369C	36.1878	35.6503
YDR370C	55.5627	54.6488
YDR372C	109.45	112.682
YDR375C	86.4885	74.824
YDR378C	35.9725	33.9699
YDR379C-A	15.5457	17.5881
YDR381C-A	21.8347	18.3613
YDR383C	15.554	16.6885
YDR384C	108.901	115.756
YDR387C	56.0072	51.307
YDR390C	106.832	102.609
YDR391C	96.303	89.5924
YDR397C	52.0455	54.1451
YDR402C	4.36749	4.07408
YDR404C	58.801	68.4785
YDR407C	159.441	128.808
YDR408C	68.5879	73.4077
YDR410C	21.9921	29.2508
YDR411C	112.525	120.432
YDR414C	25.2498	26.8755
YDR415C	41.5823	48.4837
YDR422C	95.6239	79.0821
YDR423C	61.9373	53.8662
YDR424C	17.4507	20.0619
YDR426C	0.184972	0.828939
YDR428C	24.8246	23.6862
YDR429C	263.162	269.753
YDR430C	185.856	181.295
YDR435C	39.0645	44.3372
YDR441C	35.7323	29.63
YDR443C	120.167	101.54
YDR445C	462.844	451.211
YDR447C	1090.13	1185.38
YDR449C	72.4916	82.4892
YDR451C	94.572	98.8817
YDR453C	17.8399	16.72
YDR454C	143.084	151.032
YDR458C	76.9005	71.5587
YDR459C	49.5774	47.9912
YDR461C-A	6.00462	7.33406
YDR465C	85.6327	90.8973
YDR468C	32.8473	38.2131
YDR470C	42.3222	50.4371
YDR473C	28.5101	29.0075
YDR475C	67.1275	58.1301
YDR476C	57.5781	63.5085
YDR479C	66.879	69.8018
YDR481C	118.121	133.286
YDR482C	9.70676	7.85266
YDR485C	59.8474	50.6513
YDR486C	46.5323	52.5412
YDR487C	118.395	120.964
YDR488C	20.0126	24.3757
YDR490C	85.4174	79.7306
YDR495C	48.7906	51.1141
YDR496C	210.554	226.221
YDR497C	1180.46	1237.74
YDR498C	43.5341	42.2314
YDR500C	548.303	531.501
YDR502C	604.261	612.523
YDR503C	30.1142	30.4328
YDR504C	13.4448	18.7404
YDR505C	203.919	171.619
YDR506C	22.1329	21.4948
YDR507C	204.013	185.23
YDR508C	696.845	696.5
YDR510C-A	0	0
YDR512C	16.5534	21.8034
YDR514C	33.9461	43.7759
YDR516C	145.196	144.89
YDR520C	31.1826	31.5964
YDR522C	0.684665	2.38832
YDR523C	3.29357	2.76748
YDR524C	68.8474	68.4417
YDR524C-B	685.195	647.317
YDR524C-A	0.657054	0.379163
YDR529C	240.877	227.294
YDR530C	53.8178	51.3628
YDR532C	28.4825	24.216
YDR533C	96.7003	74.0064
YDR534C	35.4589	24.6118
YDR535C	6.59815	6.3639
YDR540C	2.86841	3.14664
YDR541C	30.2577	27.9276
YDL248W	260.562	264.146
YDL244W	22.0859	24.2772
YDL242W	1.73927	1.23599
YDL241W	6.7169	7.12401
YDL240W	68.6376	57.7658
YDL237W	92.2392	95.2016
YDL236W	102.758	113.563
YDL233W	47.2446	46.601
YDL232W	17.0338	13.3894
YDL230W	26.6108	22.5077
YDL229W	4108.72	4112.11
YDL225W	86.0716	93.3473
YDL221W	1.23958	0.828939
YDL219W	26.4368	30.682
YDL218W	2.8408	3.91981
YDL212W	137.126	134.816
YDL210W	5.57116	4.97363
YDL208W	160.855	178.195
YDL207W	58.3097	46.538
YDL206W	58.986	59.7862
YDL204W	128.515	113.611
YDL202W	73.5047	68.7111
YDL201W	47.9402	57.6988
YDL195W	613.216	532.325
YDL194W	31.4034	33.9995
YDL193W	60.0406	66.5103
YDL192W	485.507	491.824
YDL191W	814.491	968.578
YDL189W	68.8667	55.7697
YDL185W	1580.66	1701.7
YDL182W	308.93	345.261
YDL181W	41.5574	39.4769
YDL180W	44.3955	47.008
YDL179W	75.418	64.1036
YDL178W	125.57	138.409
YDL176W	65.2391	62.2897
YDL173W	133.548	141.158
YDL170W	65.4627	58.9496
YDL168W	128.062	153.151
YDL165W	42.1262	44.5621
YDL161W	91.3226	82.5265
YDL159W	40.547	45.5471
YDL156W	25.6473	24.0096
YDL155W	61.4928	60.6745
YDL154W	40.7099	37.1147
YDL150W	66.6913	57.052
YDL149W	35.3375	31.6094
YDL147W	233.44	235.021
YDL146W	20.4957	19.0917
YDL143W	312.527	325.281
YDL141W	99.0196	103.136
YDL138W	55.8278	54.3961
YDL137W	237.496	225.057
YDL136W	798.78	942.39
YDL133W	67.0943	54.4222
YDL132W	155.769	143.413
YDL131W	366.9	419.791
YDL130W-A	50.9274	46.3855
YDL130W	598.118	647.865
YDL129W	4.58007	5.07213
YDL128W	164.217	167.752
YDL127W	26.009	31.6
YDL124W	470.715	457.729
YDL123W	27.9967	27.0334
YDL122W	193.235	179.639
YDL120W	56.9679	52.6433
YDL117W	103.268	103.295
YDL116W	116.882	112.708
YDL114W	0.842026	0.505551
YDL112W	210.396	220.573
YDL108W	46.7918	39.8431
YDL107W	30.128	27.2102
YDL105W	23.0384	21.1566
YDL102W	81.3618	102.726
YDL099W	46.1734	44.1349
YDL095W	430.417	418.879
YDL093W	66.1584	71.6887
YDL092W	48.2247	59.788
YDL089W	36.7703	34.39
YDL086W	235.34	229.7
YDL085W	5.78374	2.82326
YDL084W	518.277	545.352
YDL082W	903.859	817.439
YDL075W	694.868	678.201
YDL073W	99.533	80.8948
YDL070W	109.734	98.3654
YDL068W	0	0.576163
YDL066W	198.666	183.9
YDL064W	48.0148	56.1691
YDL060W	154.616	158.241
YDL058W	91.9934	101.756
YDL057W	22.1439	21.6212
YDL056W	82.8582	75.4043
YDL051W	157.23	179.245
YDL046W	104.461	110.574
YDL045W-A	36.9387	39.1126
YDL041W	0.527304	0.576163
YDL032W	0.971776	0.856827
YDL031W	138.352	149.613
YDL030W	27.3507	26.2845
YDL029W	268.85	294.147
YDL025W-A	0	0
YDL022W	701.887	640.852
YDL021W	26.6191	22.8163
YDL017W	26.862	31.931
YDL014W	488.677	461.966
YDL013W	42.5597	35.9642
YDL010W	44.1802	40.2317
YDL008W	31.3675	35.2225
YDL007W	171.947	184.96
YDL006W	25.501	27.1544
YDL004W	168.366	181.819
YDL003W	77.8888	73.7743
YDL001W	40.721	42.172
YDR002W	286.184	298.144
YDR003W-A	4.34818	4.74875
YDR004W	47.8244	48.6605
YDR007W	37.4467	34.5033
YDR009W	15.5623	17.9115
YDR011W	403.839	375.637
YDR012W	2754.01	2748.37
YDR013W	29.5068	28.4759
YDR014W	31.5166	33.4311
YDR014W-A	1.79449	0.983214
YDR021W	23.5381	26.4946
YDR023W	641.981	674.679
YDR024W	1.52669	2.00915
YDR025W	1295.28	1282.8
YDR031W	29.6007	27.5354
YDR033W	1258.91	1236.67
YDR034W-B	10.7255	11.5624
YDR035W	224.429	234.014
YDR037W	890.729	926.71
YDR041W	72.3922	75.4672
YDR044W	50.1076	44.075
YDR047W	118.684	122.815
YDR049W	61.1891	55.7845
YDR055W	887.708	863.419
YDR057W	35.8345	34.5407
YDR060W	336.711	307.525
YDR061W	67.9556	69.8931
YDR062W	204.386	196.541
YDR063W	33.013	30.5016
YDR064W	1146.79	1141.03
YDR065W	18.9138	20.1158
YDR068W	27.7233	35.2397
YDR073W	47.0982	45.5845
YDR074W	585.653	548.646
YDR075W	25.973	26.2436
YDR076W	21.6415	23.1509
YDR077W	10751.6	9430.37
YDR079W	14.4994	15.4247
YDR080W	71.332	67.2876
YDR082W	56.1645	53.8982
YDR083W	66.5173	73.6924
YDR089W	102.901	90.7934
YDR092W	60.891	70.2313
YDR093W	175.277	161.461
YDR096W	136.911	117.963
YDR099W	447.599	454.644
YDR100W	51.8496	55.3959
YDR103W	104.304	93.9323
YDR106W	5.4221	4.32686
YDR108W	55.3584	50.9521
YDR110W	36.3369	31.9981
YDR115W	44.8289	42.1329
YDR118W	35.6412	33.1652
YDR119W	174.923	204.146
YDR119W-A	7.32703	5.16885
YDR121W	30.0727	32.0331
YDR122W	193.12	153.843
YDR124W	15.3967	19.3445
YDR126W	20.0596	19.2756
YDR127W	1003	1048.74
YDR128W	108.362	101.006
YDR137W	63.2348	60.2176
YDR138W	68.3781	67.2615
YDR140W	34.3271	38.2985
YDR145W	194.296	164.588
YDR147W	66.8404	72.7259
YDR150W	693.83	577.065
YDR152W	79.1836	81.9854
YDR158W	604.583	605.848
YDR159W	69.7364	68.7449
YDR160W	70.6087	68.059
YDR161W	67.191	73.5044
YDR163W	19.3942	19.694
YDR165W	139.611	158.237
YDR167W	51.8882	39.1536
YDR168W	124.421	125.608
YDR171W	166.106	145.05
YDR172W	506.166	499.532
YDR174W	315.484	298.724
YDR176W	71.8317	56.3963
YDR177W	116.167	120.821
YDR178W	77.1267	80.4593
YDR179W-A	26.3044	30.0204
YDR180W	49.2876	48.4766
YDR182W	101.433	104.623
YDR183W	17.8482	23.307
YDR188W	308.693	302.946
YDR189W	131.284	131.346
YDR191W	23.4829	22.4223
YDR195W	64.4716	61.5871
YDR197W	40.3068	45.6438
YDR201W	12.1942	12.91
YDR204W	55.9492	61.3955
YDR205W	70.4873	72.8481
YDR206W	229.387	206.85
YDR208W	158.309	153.94
YDR210W	77.4776	68.4898
YDR211W	217.041	203.167
YDR212W	269.94	303.812
YDR213W	74.899	72.1533
YDR214W	405.307	434.255
YDR216W	361.21	339.396
YDR221W	73.8554	77.6639
YDR222W	40.674	53.2882
YDR223W	7.05923	5.9699
YDR225W	597.245	576.454
YDR226W	329.892	337.773
YDR227W	109.784	96.6671
YDR229W	44.0614	37.2821
YDR232W	232.761	210.393
YDR234W	176.362	193.896
YDR235W	55.963	56.4687
YDR237W	66.4235	68.6738
YDR241W	5.65399	5.3528
YDR242W	70.8516	57.6115
YDR244W	64.1513	67.6294
YDR245W	94.238	108.456
YDR246W	35.9779	38.5792
YDR247W	47.7057	35.9624
YDR251W	183.529	166.153
YDR252W	15.1924	13.1497
YDR254W	25.131	23.9223
YDR262W	67.7625	65.8879
YDR265W	39.7768	40.278
YDR268W	39.5669	49.1435
YDR270W	42.7307	41.0066
YDR272W	80.887	84.6265
YDR273W	5.05215	3.87708
YDR275W	27.8255	25.7641
YDR279W	31.7485	32.6318
YDR280W	58.1523	67.2224
YDR285W	18.9055	17.4878
YDR287W	27.6378	28.054
YDR288W	32.1267	28.2213
YDR291W	105.375	89.6078
YDR296W	78.9378	79.2826
YDR297W	109.408	110.638
YDR299W	94.0034	94.1056
YDR301W	108.08	97.5513
YDR302W	36.3645	36.1612
YDR307W	81.072	87.0908
YDR311W	52.9841	43.9397
YDR312W	62.9394	68.739
YDR316W	56.9374	56.9576
YDR317W	3.84849	3.91981
YDR318W	22.9942	20.2274
YDR320W-B	0.684665	0.604051
YDR321W	210.073	235.555
YDR322W	92.4352	91.5031
YDR325W	72.4501	64.8566
YDR330W	56.8961	46.5564
YDR331W	100.751	112.604
YDR332W	52.6115	49.2515
YDR334W	83.9016	78.4341
YDR335W	262.301	239.408
YDR336W	27.3148	29.2751
YDR337W	68.3228	62.7934
YDR347W	93.2799	97.921
YDR351W	139.486	124.92
YDR352W	43.0344	56.1708
YDR353W	312.682	323.727
YDR354W	102.722	105.762
YDR356W	48.3515	51.0601
YDR358W	71.2934	68.4975
YDR363W	38.5482	32.9107
YDR363W-A	40.3234	35.048
YDR367W	62.437	67.5196
YDR368W	105.554	100.634
YDR371W	45.6351	45.8094
YDR374W-A	22.4117	26.0781
YDR376W	59.6514	64.6667
YDR377W	106.777	105.928
YDR379W	113.599	93.2861
YDR380W	164.54	196.123
YDR381W	321.005	326.328
YDR382W	587.79	603.796
YDR385W	5575.99	5890.5
YDR386W	41.2869	40.148
YDR388W	289.566	284.798
YDR389W	95.0993	82.5355
YDR392W	26.6025	29.5837
YDR393W	46.1927	42.1851
YDR394W	183.457	176.726
YDR395W	327.786	325.398
YDR396W	0	0.379163
YDR398W	156.255	158.913
YDR399W	124.22	121.875
YDR401W	3.23835	3.76553
YDR403W	9.88342	8.79494
YDR405W	59.516	62.2541
YDR406W	174.159	154.371
YDR409W	64.3087	54.0133
YDR412W	34.3823	36.1297
YDR416W	41.2759	40.6536
YDR418W	1053.15	1147.54
YDR419W	38.7471	38.702
YDR420W	461.461	343.011
YDR421W	85.4698	69.492
YDR425W	40.6022	34.9792
YDR427W	186.872	213.425
YDR434W	112.495	116.397
YDR436W	64.0768	59.3863
YDR438W	27.3976	26.9592
YDR439W	24.7777	20.6214
YDR440W	48.901	43.0567
YDR442W	0	0.126388
YDR444W	58.2075	55.2974
YDR446W	0.869636	0.604051
YDR448W	88.2057	85.9515
YDR450W	958.898	976.895
YDR452W	144.586	150.788
YDR456W	129.956	140.831
YDR457W	648.275	588.601
YDR460W	22.928	25.2568
YDR461W	0.157361	0.224888
YDR462W	44.9201	51.069
YDR463W	113.928	106.322
YDR464W	69.1428	57.7883
YDR466W	108.516	86.8961
YDR469W	36.9277	35.7672
YDR471W	591.271	594.608
YDR472W	44.782	39.2538
YDR477W	147.203	157.796
YDR478W	17.8013	16.8725
YDR483W	209.576	216.002
YDR484W	49.801	46.9599
YDR489W	29.8105	30.5426
YDR492W	65.7195	66.9043
YDR493W	29.573	36.2763
YDR494W	104.773	99.583
YDR499W	46.3776	41.9008
YDR501W	14.8224	17.7572
YDR510W	89.2437	107.982
YDR511W	42.071	50.5356
YDR513W	119.609	115.269
YDR515W	39.7326	42.1127
YDR517W	86.1876	78.0188
YDR518W	63.3371	69.0921
YDR519W	55.9133	65.6404
YDR525W-A	76.8425	87.6557
YDR527W	48.5919	48.3407
YDR528W	45.0249	42.0456
YDR531W	63.7511	75.1344
YDR536W	14.8361	10.3953
YDR538W	48.3185	42.9209
YDR539W	86.5825	98.5565
YEL073C	41.3118	39.1814
YEL068C	10.0767	12.9117
YEL064C	27.8228	27.803
YEL063C	184.611	176.423
YEL061C	65.4791	65.4274
YEL060C	729.202	675.063
YEL059C-A	10.419	11.1684
YEL057C	2.92363	2.23404
YEL055C	192.462	201.173
YEL054C	902.904	931.406
YEL053C	86.6597	78.1083
YEL050C	118.544	125.462
YEL048C	18.6709	23.6304
YEL047C	119.231	112.859
YEL046C	637.298	589.916
YEL039C	32.0578	37.4381
YEL037C	131.116	131.153
YEL036C	180.79	158.967
YEL034C-A	0.369943	0.576163
YEL029C	29.562	35.1352
YEL025C	142.639	132.427
YEL023C	28.3225	23.3889
YEL017C-A	88.584	66.9429
YEL016C	40.3703	48.454
YEL009C-A	0.786805	2.23404
YEL009C	1008.15	835.168
YEL008C-A	0.499693	0.927439
YEL005C	27.047	31.667
YEL002C	192.832	198.875
YEL001C	124.073	143.161
YER003C	268.154	278.693
YER007C-A	94.354	89.5853
YER008C	145.668	134.841
YER010C	45.7538	41.1087
YER017C	241.021	237.497
YER018C	35.4562	29.2508
YER019C-A	88.4239	97.0232
YER023C-A	0	0.351276
YER026C	328.506	392.981
YER027C	73.7063	77.5802
YER028C	11.9264	11.7594
YER029C	24.0185	29.7118
YER031C	119.623	117.026
YER033C	82.7257	62.708
YER036C	492.693	529.499
YER038C	23.9357	26.5521
YER039C	11.123	9.52359
YER043C	1991.58	2177.29
YER044C	94.02	86.9923
YER044C-A	8.36504	12.5456
YER045C	48.8375	28.4349
YER047C	73.0852	62.6706
YER048C	109.947	96.7372
YER050C	62.3431	57.5112
YER052C	273.186	296.383
YER053C	150.201	129.391
YER053C-A	59.7259	58.1189
YER054C	55.375	37.8731
YER055C	306.476	342.698
YER056C	568.462	629.623
YER056C-A	715.897	742.31
YER057C	67.8867	71.1754
YER061C	33.9378	30.6968
YER062C	183.708	196.381
YER064C	202.934	196.427
YER065C	23.0687	21.7346
YER071C	20.8271	22.2271
YER075C	73.8002	66.0682
YER076C	20.8574	21.6064
YER077C	118.706	124.144
YER078C	53.0449	55.368
YER082C	121.23	118.44
YER083C	104.803	96.421
YER085C	0	0.252776
YER087C-B	39.2495	37.4975
YER088C	234.931	201.712
YER088C-A	25.7771	27.9329
YER089C	181.773	175.146
YER091C	1262.76	1365.02
YER093C	76.6216	65.2078
YER093C-A	11.2417	9.86182
YER094C	146.121	160.551
YER099C	67.4146	73.5323
YER101C	40.6215	34.784
YER105C	300.322	265.202
YER107C	71.9008	72.1568
YER109C	88.7772	63.2972
YER110C	400.802	407.015
YER111C	87.6093	79.7555
YER113C	92.0017	89.1931
YER114C	132.06	125.046
YER115C	20.4847	16.6607
YER116C	35.7157	27.9145
YER118C	87.9738	86.091
YER119C	74.4904	68.367
YER122C	183.617	183.289
YER124C	320.815	302.607
YER126C	98.5116	105.727
YER130C	95.3146	84.0076
YER132C	113.665	92.4774
YER134C	43.4044	43.8186
YER137C	10.7614	10.648
YER139C	23.7424	28.5055
YER142C	10.1512	10.1983
YER144C	130.536	113.05
YER145C	110.592	96.809
YER147C	33.2532	37.1035
YER149C	41.4968	40.5587
YER151C	162.74	153.732
YER152C	84.2883	85.3362
YER155C	425.911	359.638
YER156C	128.46	136.485
YER158C	26.3044	24.2475
YER159C	70.0289	55.4837
YER161C	37.9437	33.5053
YER162C	30.1473	23.7402
YER163C	54.7124	59.4273
YER168C	94.4698	88.5463
YER172C	268.59	250.19
YER174C	42.601	43.8056
YER175C	46.3915	48.6232
YER180C	26.1304	24.4854
YER180C-A	10.1126	9.0756
YER181C	2.18374	1.81215
YER183C	32.8749	35.5738
YER184C	52.9372	46.0622
YER186C	41.1102	42.3429
YER188C-A	4.82026	3.99042
YEL072W	20.7911	21.4094
YEL071W	453.764	453.415
YEL070W	11.5012	9.34322
YEL066W	54.8201	47.8518
YEL065W	131.179	126.008
YEL062W	46.8194	45.3632
YEL058W	285.345	289.919
YEL056W	68.1545	70.6123
YEL052W	82.9244	83.578
YEL051W	132.922	139.3
YEL049W	13.3896	11.029
YEL044W	31.108	30.9775
YEL043W	164.869	138.753
YEL042W	153.865	158.565
YEL041W	27.174	25.3144
YEL040W	449.071	465.909
YEL038W	46.132	48.4986
YEL034W	1242.44	1338.6
YEL033W	291.082	371.274
YEL032W	161.849	180.428
YEL031W	580.91	616.528
YEL030W	54.7952	47.7384
YEL028W	9.84481	8.8786
YEL027W	410.125	423.416
YEL026W	173.427	178.558
YEL024W	241.576	229.015
YEL022W	189.95	180.812
YEL021W	582.102	580.25
YEL020W-A	104.853	105.305
YEL018W	22.4559	23.5449
YEL017W	74.4711	72.0453
YEL015W	128.932	129.059
YEL013W	201.059	204.405
YEL012W	22.928	22.7718
YEL011W	124.148	113.898
YEL008W	0.842026	1.02594
YEL007W	201.598	170.688
YEL006W	70.6253	69.9246
YEL004W	24.9737	26.1024
YEL003W	33.8108	39.1446
YER001W	262.8	252.076
YER002W	43.3658	45.2148
YER004W	66.8404	59.8658
YER005W	73.7339	67.8673
YER006W	197.423	230.265
YER007W	17.8123	17.8984
YER009W	249.687	272.625
YER011W	17.6825	16.075
YER012W	115.827	124.652
YER013W	60.0599	61.8381
YER014W	41.6182	40.7278
YER015W	44.793	45.365
YER016W	36.9001	38.6723
YER019W	73.6318	70.8669
YER020W	73.1817	71.2816
YER021W	276.436	285.961
YER022W	69.2284	62.6374
YER023W	158.919	177.913
YER024W	64.4108	56.318
YER025W	413.769	442.688
YER030W	33.4408	31.9275
YER032W	94.5417	79.5692
YER034W	22.3454	20.4131
YER035W	70.109	65.9045
YER037W	9.51348	5.23946
YER038W-A	2.23897	2.13554
YER040W	69.0158	62.5982
YER041W	55.8774	50.573
YER042W	23.5408	22.6454
YER046W	12.3792	13.5995
YER048W-A	34.3188	37.4251
YER049W	236.775	236.057
YER051W	24.2311	28.0688
YER058W	8.10554	10.5365
YER059W	49.1578	41.0328
YER060W	20.1617	19.6269
YER060W-A	91.2122	106.156
YER063W	86.7536	87.5032
YER066W	23.0604	22.3517
YER067W	140.105	146.04
YER068W	117.163	107.888
YER069W	451.555	498.243
YER070W	957.15	982.03
YER072W	71.495	79.4778
YER073W	241.957	238.516
YER074W	861.857	886.94
YER074W-A	26.7322	32.2711
YER076W-A	0.472083	0.702551
YER079W	25.6114	20.1734
YER080W	116.501	111.193
YER081W	139.804	147.468
YER084W	4.03346	2.45893
YER086W	350.123	323.723
YER087W	36.4004	37.4939
YER088W-B	0.184972	0
YER090W	290.701	312.105
YER092W	38.0844	44.8594
YER095W	85.3759	96.1124
YER096W	3.8678	5.38068
YER098W	47.2915	33.1635
YER100W	55.5627	55.3828
YER102W	1929.13	1984.03
YER103W	72.7069	71.5902
YER104W	18.5991	19.6827
YER106W	0.684665	0.604051
YER112W	42.6452	48.8409
YER117W	921.332	984.326
YER120W	205.604	203.332
YER121W	7.26351	5.38068
YER123W	69.8661	67.9178
YER125W	327.813	297.564
YER127W	65.7195	72.3633
YER128W	18.2927	17.181
YER129W	104.696	95.4086
YER131W	488.29	495.041
YER133W	237.981	230.794
YER136W	162.732	167.513
YER138W-A	119.413	135.255
YER140W	34.2995	36.9474
YER141W	173.342	168.838
YER143W	59.886	63.2913
YER146W	42.5983	38.4955
YER148W	84.6637	84.331
YER150W	33.67	30.6132
YER154W	127.323	110.991
YER157W	77.9274	72.8374
YER158W-A	0.157361	0
YER164W	176.966	153.39
YER165W	621.772	614.622
YER166W	317.924	283.292
YER167W	127.212	105.068
YER169W	72.9857	64.6833
YER170W	23.0963	21.6622
YER171W	104.489	108.887
YER173W	65.3054	59.6765
YER175W-A	0.314722	0.379163
YER176W	87.8248	75.8001
YER177W	1039.1	980.419
YER178W	506.37	499.798
YER179W	1.89663	3.24514
YER182W	36.9001	45.3911
YER187W	0.499693	0.730439
YER188W	3.28527	3.14664
YFL057C	30.6443	26.8737
YFL054C	57.8486	50.5469
YFL050C	82.433	70.9529
YFL048C	149.787	151.838
YFL045C	395.758	441.989
YFL044C	62.6855	69.4469
YFL042C	65.3992	55.5371
YFL039C	1881.66	1881.19
YFL038C	276.787	320.313
YFL034C-B	47.9292	39.5476
YFL034C-A	159.107	179.668
YFL033C	164.874	126.57
YFL029C	30.6083	26.2288
YFL028C	69.3637	70.96
YFL027C	27.7565	26.1842
YFL025C	77.0192	79.4037
YFL024C	95.9799	75.3485
YFL022C	356.901	362.178
YFL021C-A	2.78558	1.93854
YFL020C	12.658	9.65177
YFL018C	338.114	378.686
YFL017C	49.9832	47.2442
YFL016C	183.17	176.239
YFL013C	97.2996	86.0298
YFL010C	193.197	181.956
YFL003C	1.62883	3.00542
YFL002C	104.119	106.279
YFR003C	51.0461	45.8836
YFR005C	70.7661	70.2853
YFR011C	53.8564	54.4091
YFR014C	64.5545	67.7967
YFR015C	186.273	165.734
YFR016C	108.039	96.8641
YFR017C	45.3286	37.9324
YFR018C	60.9269	64.2075
YFR024C-A	119.372	111.677
YFR025C	71.3293	64.4881
YFR026C	8.03101	9.08865
YFR028C	109.524	100.685
YFR031C	81.1768	84.9095
YFR031C-A	1936.14	2061.46
YFR032C-A	452.276	429.021
YFR033C	133.291	115.03
YFR034C	66.2578	53.9071
YFR037C	162.539	151.549
YFR039C	57.9204	59.8213
YFR041C	56.609	57.3682
YFR043C	19.4025	20.244
YFR044C	387.037	422.649
YFR046C	26.6025	25.8199
YFR047C	51.1842	56.9719
YFR050C	164.664	173.838
YFR051C	284.478	296.392
YFR053C	1192.97	1200.91
YFR054C	1.05461	0.126388
YFL055W	19.7752	16.9283
YFL053W	2.02638	3.02026
YFL052W	21.3847	17.0416
YFL049W	110.275	94.286
YFL047W	77.8805	79.2624
YFL046W	26.5639	29.3048
YFL041W-A	2.55369	2.06493
YFL041W	64.9657	66.0457
YFL037W	300.546	298.461
YFL036W	202.5	198.673
YFL034W	60.2891	57.2585
YFL031W	527.832	495.185
YFL030W	25.512	24.2641
YFL026W	15.7859	14.1198
YFL023W	51.2035	48.5211
YFL021W	235.892	205.968
YFL017W-A	14.9798	15.0325
YFL014W	719.863	747.246
YFL012W-A	0.157361	0.126388
YFL012W	0.157361	0.126388
YFL011W	2.36872	3.03509
YFL010W-A	0	0.252776
YFL009W	130.669	131.356
YFL008W	126.74	123.593
YFL007W	316.097	317.589
YFL005W	94.9612	98.9879
YFL004W	148.807	142.894
YFL001W	42.4519	39.226
YFR001W	46.5792	49.5529
YFR002W	197.564	188.549
YFR004W	133.106	133.93
YFR006W	130.815	135.614
YFR007W	33.2642	31.9773
YFR008W	35.4369	30.9348
YFR009W	253.34	252.439
YFR010W	175.859	182.388
YFR010W-A	0	0
YFR013W	87.6039	93.9863
YFR019W	227.709	182.585
YFR020W	21.6498	21.1863
YFR021W	35.3155	35.9939
YFR022W	66.8873	58.4719
YFR023W	1.027	1.91065
YFR027W	13.5662	13.2761
YFR029W	53.9974	43.0621
YFR030W	174.247	153.542
YFR034W-A	6.7169	11.4639
YFR038W	87.5018	83.3033
YFR040W	139.415	118.717
YFR042W	27.1657	31.2451
YFR045W	31.4587	33.3397
YFR048W	69.4134	62.2784
YFR049W	28.2203	33.9568
YFR052W	158.028	156.309
YFR055W	102.026	104.564
YGL257C	60.7446	61.3771
YGL252C	130.492	137.699
YGL251C	61.1062	56.0783
YGL246C	55.1265	65.7597
YGL242C	42.9682	42.9879
YGL237C	39.001	37.2132
YGL236C	68.3698	70.4301
YGL231C	109.588	116.105
YGL230C	0.499693	2.30465
YGL229C	23.5188	21.9986
YGL226C-A	32.5023	29.84
YGL224C	51.1952	50.1564
YGL223C	73.7615	70.2853
YGL222C	124.211	129.296
YGL221C	145.516	152.227
YGL219C	111.846	97.0066
YGL213C	76.4533	84.8977
YGL206C	638.063	594.753
YGL204C	4.81196	5.53496
YGL203C	93.6085	112.617
YGL201C	133.076	134.156
YGL200C	139.92	142.726
YGL199C	1.60952	1.08171
YGL194C-A	10.5571	7.62956
YGL194C	55.1901	56.9125
YGL193C	0	0
YGL190C	102.606	111.255
YGL189C	1047.58	1075.64
YGL187C	152.271	145.509
YGL186C	67.9143	76.3573
YGL185C	30.8016	34.8249
YGL184C	9.24298	6.68729
YGL182C	0.527304	0.576163
YGL179C	16.4513	17.9002
YGL176C	39.2964	34.2618
YGL175C	14.85	10.451
YGL173C	653.666	645.54
YGL167C	323.23	295.211
YGL165C	3.29357	2.23404
YGL164C	35.078	32.4051
YGL163C	58.7265	58.4814
YGL161C	80.854	93.3152
YGL154C	19.5792	21.5767
YGL152C	0.684665	0.224888
YGL150C	203.983	179.262
YGL147C	1148.42	1365.98
YGL146C	10.5957	11.5624
YGL144C	23.1129	24.3478
YGL143C	40.6491	45.0843
YGL142C	70.5867	83.1022
YGL140C	237.918	209.797
YGL136C	33.6617	30.2619
YGL131C	101.642	80.8242
YGL129C	85.6051	92.7242
YGL128C	28.7283	23.4352
YGL127C	24.1952	21.1454
YGL124C	55.0408	53.9575
YGL122C	173.129	174.047
YGL121C	38.1037	30.6411
YGL120C	195.665	196.862
YGL112C	109.146	110.946
YGL110C	45.497	55.2196
YGL108C	20.3826	14.8058
YGL107C	106.865	115.886
YGL104C	44.6081	41.8783
YGL095C	101.479	94.2616
YGL094C	137.485	121.256
YGL091C	51.7777	59.2487
YGL089C	2.05399	3.44214
YGL087C	65.0901	61.2097
YGL084C	112.301	106.956
YGL078C	161.481	166.643
YGL077C	245.162	258.533
YGL076C	1739.7	1922.28
YGL075C	14.1847	14.6515
YGL072C	5.05215	2.76748
YGL070C	45.1437	49.677
YGL065C	66.302	72.1384
YGL064C	52.4155	44.9971
YGL063C-A	0	0.126388
YGL061C	23.1129	24.1063
YGL057C	26.7239	26.1878
YGL056C	174.772	166.509
YGL054C	118.215	134.714
YGL049C	207.221	186.811
YGL048C	217.119	220.145
YGL044C	31.0059	33.4477
YGL040C	118.944	125.222
YGL038C	72.3397	78.6139
YGL037C	404.09	393.875
YGL035C	106.418	94.9025
YGL032C	0.157361	0.126388
YGL031C	976.058	986.353
YGL028C	358.867	324.539
YGL027C	128.896	121.693
YGL026C	591.763	593
YGL025C	55.8498	42.5809
YGL023C	94.042	83.3514
YGL020C	65.3992	62.6261
YGL018C	26.851	26.6097
YGL015C	0.842026	0.505551
YGL013C	131.944	123.159
YGL011C	168.005	200.317
YGL009C	891.625	950.746
YGL008C	7758.66	7772.87
YGL007C-A	0.369943	0.477663
YGL005C	39.7023	36.8489
YGL004C	27.6737	31.4848
YGL003C	46.6068	44.6197
YGL001C	144.058	160.976
YGR001C	88.5287	93.4861
YGR002C	71.5143	64.9901
YGR005C	55.571	56.9315
YGR008C	59.4112	57.1766
YGR009C	101.598	98.884
YGR015C	28.3667	30.9217
YGR018C	0.184972	0.351276
YGR020C	95.9413	91.8805
YGR024C	65.9458	69.0754
YGR027C	793.894	833.916
YGR030C	22.1329	26.6637
YGR033C	64.1569	61.9775
YGR035C	0.184972	0.505551
YGR036C	31.7541	30.0352
YGR037C	82.1183	90.9008
YGR043C	14.1571	17.772
YGR044C	97.6173	95.3131
YGR045C	5.02454	4.27108
YGR047C	64.0106	69.8338
YGR050C	6.55954	3.65219
YGR053C	6.92118	5.60557
YGR057C	34.4678	30.5538
YGR061C	545.379	548.294
YGR062C	29.9982	32.1168
YGR063C	38.8988	45.5768
YGR065C	93.4483	107.194
YGR067C	11.0292	7.2765
YGR068C	67.0336	67.6923
YGR071C	63.3811	50.4264
YGR073C	6.99571	6.29329
YGR075C	16.4982	19.64
YGR076C	34.7356	41.8914
YGR077C	74.0403	60.6318
YGR078C	53.4894	58.2637
YGR081C	53.1001	53.4389
YGR083C	187.283	188.389
YGR084C	105.03	100.493
YGR085C	1328.21	1335.86
YGR086C	692.093	646.453
YGR087C	53.0694	78.4424
YGR095C	39.694	41.9359
YGR098C	107.564	95.1001
YGR102C	34.4927	34.2933
YGR104C	41.6265	36.611
YGR106C	158.93	166.141
YGR109C	35.8621	37.9324
YGR117C	77.3229	70.6034
YGR119C	145.701	143.246
YGR120C	35.7047	36.4976
YGR121C	37.0933	39.4212
YGR122C-A	43.3961	43.2128
YGR123C	77.7674	91.4325
YGR128C	148.605	142.985
YGR130C	233.354	215.7
YGR132C	136.778	150.929
YGR138C	173.449	141.864
YGR146C	34.6528	33.507
YGR146C-A	0.684665	0.576163
YGR147C	54.3839	60.7487
YGR148C	846.251	833.984
YGR150C	73.7862	78.2145
YGR154C	38.4737	32.2972
YGR158C	49.8618	46.7813
YGR159C	411.26	468.124
YGR161C	185.9	151.313
YGR168C	62.7847	50.64
YGR169C	28.2479	27.8048
YGR169C-A	27.2319	22.2217
YGR171C	44.7351	39.1257
YGR172C	89.2493	99.5397
YGR174C	27.566	35.1501
YGR175C	590.217	640.194
YGR177C	60.5459	67.7333
YGR178C	316.491	306.151
YGR179C	29.609	26.5225
YGR180C	330.695	336.252
YGR182C	63.2817	60.7564
YGR183C	68.2979	72.3948
YGR184C	312.361	291.297
YGR185C	437.813	505.32
YGR187C	78.2312	88.9551
YGR188C	20.4488	17.2629
YGR189C	1395.62	1303.68
YGR192C	10896.6	10902.6
YGR193C	109.919	100.756
YGR194C	70.976	69.5157
YGR196C	47.6228	47.9971
YGR197C	34.4761	36.4009
YGR200C	143.799	169.316
YGR201C	10.4743	13.4731
YGR202C	80.2686	77.7885
YGR204C-A	0.814415	0.955327
YGR207C	99.014	107.153
YGR209C	104.861	116.479
YGR210C	112.188	117.198
YGR213C	8.76259	8.57005
YGR216C	65.7415	69.9044
YGR220C	93.1281	112.082
YGR221C	32.5685	23.294
YGR223C	51.4823	50.4893
YGR229C	171.367	176.184
YGR231C	148.859	146.615
YGR233C	104.014	92.866
YGR235C	92.2805	88.8472
YGR236C	0.684665	0.379163
YGR237C	64.6373	61.3195
YGR238C	49.8728	44.3319
YGR239C	38.6477	40.7853
YGR240C	1616.42	1587.88
YGR241C	111.029	97.8557
YGR244C	183.628	192.81
YGR245C	163.461	178.388
YGR246C	62.6136	61.9105
YGR250C	129.898	114.296
YGR253C	215.194	235.829
YGR255C	89.5557	92.2632
YGR257C	56.0817	59.1484
YGR258C	54.6931	53.4911
YGR259C	7.2442	7.19284
YGR261C	154.187	170.582
YGR262C	57.7105	52.346
YGR263C	20.3936	19.3759
YGR264C	520.784	566.161
YGR267C	104.113	112.504
YGR268C	39.0369	35.6165
YGR271C-A	26.8178	28.3311
YGR274C	68.7011	66.5405
YGR276C	45.486	46.6401
YGR277C	50.3725	46.6271
YGR279C	918.668	860.147
YGR280C	42.1814	49.6159
YGR282C	1330.21	1261.89
YGR283C	41.1986	41.133
YGR284C	151.394	164.621
YGR285C	483.415	481.632
YGR286C	19.9022	20.2737
YGR287C	21.9479	23.5449
YGR289C	45.8669	41.1888
YGL263W	0	0.828939
YGL258W	0.499693	0.224888
YGL256W	98.4232	83.3217
YGL255W	118.604	84.903
YGL254W	37.2397	36.2633
YGL253W	727.685	780.658
YGL250W	16.5175	19.7106
YGL248W	114.46	99.2051
YGL247W	21.9838	26.2881
YGL245W	911.835	956.638
YGL244W	97.9953	97.8675
YGL243W	53.9256	53.1619
YGL241W	110.084	105.584
YGL240W	11.954	9.82088
YGL238W	347.721	356.804
[truncated: 3,648 more rows]
