# Supplementary material for: Decapping factor Dcp2 controls mRNA abundance and translation to adjust metabolism and filamentation to nutrient availability
Source: eLife journal article supplement (doi:10.7554/elife.85545), 2023-06-02
Supplement: fig2-data1 [file Figure 2 – source data 1.xlsx]

## Sheet: Sheet1
Gene_ID	mRNA_pat1	Gene_ID	mRNA_pat1dhh1	Gene_ID	mRNA_scd6edc3	Gene_ID	mRNA_upf1
YAL067C	0.719564	YPL187W	10.3935	YFL014W	7.03352	ETS1-1	-0.801003
YAL063C	1.44703	YMR107W	8.65307	YOR178C	5.25397	ETS1-2	-0.801003
YAL054C	2.31778	YGL089C	7.85146	YOL052C-A	5.24829	ETS2-1	NA
YAL049C	1.27621	YJL153C	7.06544	YBL048W	5.15061	ETS2-2	NA
YAL047C	1.15353	YDR034W-B	6.87818	YHR087W	4.87285	HRA1	1.53448
YAL046C	1.63896	YFL014W	6.63748	YNR034W-A	4.80851	ICR1	2.85034
YAL044C	1.48819	YCR021C	6.57196	YBR072W	4.69953	IRT1	1.63873
YAL043C	0.692449	YHR139C	6.44246	YMR107W	4.64699	ITS1-1	-1.21463
YAL040C	0.486464	YBR072W	6.33422	YPL223C	4.49187	ITS1-2	-1.21463
YAL039C	1.66769	YOL052C-A	6.3075	YPR160W	4.27427	ITS2-1	-1.03327
YAL036C	1.31535	YFL053W	6.20184	YIL160C	4.17929	ITS2-2	-1.03327
YAL034C	1.65183	YNR064C	6.09692	YGR248W	4.14934	LSR1	-0.442415
YAL032C	0.648802	YPL223C	5.78529	YLR327C	3.95072	NME1	-0.568235
YAL031C	0.71681	YPR145C-A	5.75309	YDR034W-B	3.71336	NTS1-2	-0.452696
YAL029C	0.357368	YLR327C	5.66657	YIL101C	3.59841	NTS2-1	-0.816819
YAL026C-A	0.519888	YIL160C	5.62171	YER054C	3.55815	NTS2-2	-0.816819
YAL026C	0.545566	YBR056W-A	5.51713	YKL163W	3.54676	PWR1	0.887868
YAL025C	0.89668	YKL178C	5.43641	YGL121C	3.4517	Q0010	0.0171211
YAL024C	0.326739	YMR175W	5.43146	YJL153C	3.41235	Q0017	0.221007
YAL023C	0.431235	YLL057C	5.20391	YDL021W	3.39881	Q0020	-0.751134
YAL022C	0.806053	YKL071W	5.2005	YGR259C	3.38525	Q0032	-1.51118
YAL021C	0.774331	YNR034W-A	5.18505	YML128C	3.3805	Q0045	-0.252965
YAL020C	0.976433	YOR178C	5.08953	YER067W	3.35637	Q0045	-0.263926
YAL015C	1.45816	YLR142W	5.08013	YPL186C	3.35452	Q0050	-0.0538764
YAL014C	0.79765	YHL024W	5.05287	YHR139C	3.34538	Q0055	-0.0970329
YAL010C	1.13014	YHR087W	4.95535	YEL011W	3.3387	Q0055	-0.190914
YAL007C	0.956759	YGR043C	4.77944	YDL204W	3.32903	Q0060	-2.08245
YAL005C	0.186356	YGR213C	4.62319	YOR120W	3.31118	Q0060	-0.239539
YAL001C	0.527692	YHR209W	4.56513	YCR021C	3.22782	Q0065	0.0555781
YAR002C-A	0.795156	YGL121C	4.50973	YJL161W	3.21967	Q0065	0.147724
YAR007C	0.870842	YDL218W	4.47256	YBL043W	3.21679	Q0070	NA
YAR014C	0.684166	YEL070W	4.44671	YMR250W	3.15571	Q0070	NA
YAR018C	1.105	YGR248W	4.33935	YDL085W	3.15089	Q0075	NA
YAR019C	1.16985	YMR096W	4.2984	YDR119W-A	3.14481	Q0075	NA
YAL062W	4.04243	YDL204W	4.28534	YPL230W	3.14362	Q0080	-0.412502
YAL061W	3.82889	YAL061W	4.24174	YHL024W	3.13757	Q0085	-0.154246
YAL060W	1.76504	YNL117W	4.23986	YAL061W	3.08892	Q0092	NA
YAL059W	1.65892	YIL101C	4.20416	YOR173W	3.05253	Q0105	-0.300432
YAL058W	0.534924	YBL043W	4.1481	YML054C	3.04756	Q0105	-0.454883
YAL056W	0.749944	YDL222C	4.1371	YMR206W	3.03732	Q0110	0.255353
YAL055W	1.63157	YIL169C	4.1113	YMR169C	3.0285	Q0110	-0.365473
YAL053W	2.22105	YMR169C	4.08677	YMR105C	2.99315	Q0115	NA
YAL051W	0.681833	YJL144W	4.03923	YGR088W	2.9854	Q0115	NA
YAL044W-A	1.3924	YLR267W	4.02332	YJR150C	2.96849	Q0120	-0.244302
YAL042W	0.753391	YPL186C	4.01171	YOL085C	2.93739	Q0120	NA
YAL041W	0.546992	YDL085W	3.97659	YER150W	2.92325	Q0130	-0.603763
YAL038W	0.0683863	YOR120W	3.96383	YEL070W	2.91413	Q0140	-1.00326
YAL037W	1.81983	YBR285W	3.95561	YIL136W	2.90994	Q0142	0.133581
YAL035W	0.888919	YLR040C	3.94639	YNR073C	2.9094	Q0143	-0.0530797
YAL034W-A	0.716326	YLR346C	3.9366	YFR053C	2.81572	Q0144	#NAME?
YAL033W	1.24812	YKL163W	3.93185	YHR209W	2.812	Q0158	-0.631495
YAL030W	1.31657	YML128C	3.93122	YBR285W	2.80919	Q0158	-0.711472
YAL028W	2.19851	YEL039C	3.92009	YDR342C	2.78415	Q0160	-0.733428
YAL027W	1.22478	YMR174C	3.90818	YDR216W	2.73252	Q0182	-0.625049
YAL019W	0.501219	YKL107W	3.86	YML100W	2.71222	Q0250	-0.227387
YAL017W	0.673052	YJR004C	3.85277	YDR343C	2.7031	Q0255	NA
YAL016W	0.933226	YDR070C	3.83639	YFR015C	2.70274	Q0255	-0.411954
YAL013W	0.901084	YGR243W	3.77068	YER121W	2.69265	Q0275	-0.479084
YAL012W	0.156485	YOR385W	3.6776	YGR043C	2.66103	Q0285	-0.299859
YAL011W	0.379155	YPL171C	3.663	YHR022C	2.6528	Q0297	-0.575436
YAL009W	1.27035	YER150W	3.64121	YMR118C	2.64958	R0010W	-1.35276
YAL008W	1.86992	YER067W	3.63941	YJR095W	2.647	R0020C	-0.706489
YAL003W	0.289069	YGR161C	3.61401	YBR033W	2.64483	R0030W	1.63049
YAL002W	0.415652	YGR256W	3.6063	YMR081C	2.62462	R0040C	0.147935
YAR002W	0.667651	YNL036W	3.60527	YIL054W	2.61644	RDN18-1	0.495353
YAR003W	0.892802	YOR173W	3.58046	YLR258W	2.60762	RDN18-2	0.495353
YAR008W	1.27365	YJL161W	3.57985	YLR178C	2.59384	RDN25-1	1.75201
YAR015W	1.39461	YHR138C	3.56932	YGR032W	2.58676	RDN25-2	1.75201
YAR027W	1.44912	YMR316W	3.5425	YNL093W	2.57138	RDN37-1	-0.811077
YAR028W	1.84296	YPR160W	3.50563	YBR183W	2.56882	RDN37-1	-1.13573
YAR031W	1.4895	YPL230W	3.49297	YDR077W	2.55017	RDN37-2	-0.811077
YAR033W	1.12226	YGR088W	3.41519	YDR536W	2.53631	RDN37-2	-1.13573
YAR035W	3.24726	YCR007C	3.40886	YOR348C	2.50178	RDN5-1	-1.83533
YAR042W	0.195789	YIL099W	3.4044	YGL205W	2.48783	RDN5-2	-0.838508
YAR050W	1.26795	YLR194C	3.38519	YKR091W	2.47636	RDN5-3	-0.838508
YAR071W	-0.759951	YNR002C	3.35525	YGR008C	2.45458	RDN5-4	-0.838508
YBL113C	-0.403459	YGR008C	3.34827	YPR030W	2.42149	RDN5-5	-0.838508
YBL107C	-0.457225	YOL155C	3.33666	YLR053C	2.42113	RDN5-6	-1.83533
YBL106C	-0.0669177	YER053C-A	3.29724	YMR196W	2.41347	RDN58-1	-0.812354
YBL105C	-0.550158	YPR030W	3.29599	YLR149C	2.41026	RDN58-2	-0.812354
YBL104C	-0.488752	YPL088W	3.29353	YPR184W	2.38512	RME2	3.03529
YBL103C	-0.276935	YDR453C	3.29149	YGL156W	2.37781	RME3	2.61177
YBL101C	-0.213123	YKR091W	3.29101	YER053C-A	2.3713	RNA170	-0.0229007
YBL093C	0.357026	YIL136W	3.28813	YFR017C	2.32876	RPR1	-0.456656
YBL091C-A	0.734716	YJL133C-A	3.27962	YEL039C	2.32625	RUF20	0.127596
YBL091C	0.24776	YDL024C	3.27019	YNL274C	2.32453	RUF21	1.32545
YBL088C	-0.497228	YBR296C	3.2585	YDL130W-A	2.31848	RUF22	1.25108
YBL087C	-0.575316	YGL156W	3.24015	YER053C	2.29667	RUF23	1.04469
YBL086C	0.21966	YPL250C	3.23125	YOR374W	2.2869	RUF5-1	1.31356
YBL084C	-0.227561	YLR178C	3.23123	YPL171C	2.23272	RUF5-2	1.31356
YBL080C	-0.264804	YKL159C	3.21644	YDL222C	2.20937	SCR1	-0.559928
YBL078C	1.88072	YEL060C	3.20179	YMR174C	2.20118	SRG1	1.18329
YBL076C	-0.335046	YDL234C	3.20116	YDL221W	2.19105	TLC1	-0.551364
YBL075C	1.43045	YMR085W	3.19179	YLR428C	2.18586	YAL001C	0.263326
YBL074C	0.0713742	YDR077W	3.15268	YDR018C	2.17077	YAL001C	1.35382
YBL072C	-0.696844	YBL078C	3.148	YCL040W	2.16877	YAL002W	0.98372
YBL067C	-0.266272	YLR312C	3.1363	YGR243W	2.11304	YAL003W	-0.39724
YBL066C	-0.445137	YMR170C	3.11959	YDR171W	2.11103	YAL003W	-0.314078
YBL064C	1.08743	YMR250W	3.10378	YJR008W	2.08978	YAL004W	-0.174295
YBL061C	0.0446178	YHR096C	3.09363	YKL026C	2.08173	YAL005C	0.0941637
YBL059C-A	0.454854	YJR008W	3.06777	YDL169C	2.07976	YAL007C	-0.498082
YBL057C	-0.0641495	YEL073C	3.06307	YGR213C	2.07936	YAL008W	-0.163316
YBL055C	-0.232615	YMR271C	3.05687	YMR280C	2.07623	YAL009W	-0.042985
YBL052C	-0.721922	YLR414C	3.0459	YKL086W	2.07251	YAL010C	-0.0877826
YBL051C	-0.0435009	YOR289W	3.03539	YMR291W	2.05854	YAL011W	-0.0254253
YBL047C	-0.336583	YLR054C	3.03086	YGL222C	2.04889	YAL012W	-0.450586
YBL045C	0.117906	YBR284W	3.02379	YKL096W	2.04659	YAL013W	-0.162925
YBL042C	-0.339553	YGL255W	3.02307	YLR142W	2.04633	YAL014C	0.878255
YBL040C	0.585638	YEL011W	3.00374	YGR236C	2.04409	YAL015C	0.337844
YBL039C	-0.325159	YKL093W	2.97499	YLR312C	2.0397	YAL016C-A	0.0735171
YBL036C	0.116298	YOR338W	2.95116	YCR098C	2.01558	YAL016C-B	#NAME?
YBL035C	-0.836784	YAL062W	2.94929	YDR070C	1.99874	YAL016W	-0.344575
YBL034C	-0.545764	YAL054C	2.9375	YER103W	1.99738	YAL017W	-0.121034
YBL033C	-0.163784	YBR006W	2.929	YLR267W	1.9697	YAL018C	-0.194127
YBL030C	0.0322999	YOL016C	2.9228	YPR005C	1.96944	YAL019W-A	1.78186
YBL029C-A	0.448073	YJL106W	2.91557	YIR028W	1.94949	YAL019W	-0.27727
YBL028C	0.439314	YDL130W-A	2.90238	YKL161C	1.9244	YAL020C	0.495179
YBL023C	-0.238984	YBL075C	2.9013	YOR289W	1.92287	YAL021C	-0.329077
YBL022C	-0.772322	YKL026C	2.89539	YBL078C	1.90718	YAL022C	0.194548
YBL021C	0.320066	YBR085C-A	2.88904	YHL021C	1.89953	YAL023C	-0.442562
YBL018C	-0.618379	YPL054W	2.8419	YPL054W	1.8723	YAL024C	-0.406209
YBL017C	-0.430429	YGL222C	2.83971	YMR090W	1.8667	YAL025C	-0.347456
YBL014C	-0.450225	YMR040W	2.82007	YIR041W	1.86319	YAL026C-A	-0.249074
YBL010C	0.233454	YPR036W-A	2.80246	YBR169C	1.85834	YAL026C	-0.290908
YBL007C	0.0427034	YDL169C	2.79563	YGL037C	1.83474	YAL027W	0.266641
YBL006C	0.620656	YKL096W	2.78515	YNR002C	1.83323	YAL028W	1.3988
YBL003C	0.611233	YMR181C	2.78055	YKR058W	1.82925	YAL029C	-0.179811
YBL001C	0.364594	YDR216W	2.77462	YDR085C	1.82432	YAL030W	-0.25277
YBR001C	-0.400106	YOR374W	2.7721	YLR311C	1.81962	YAL030W	1.132
YBR002C	-0.182401	YDL210W	2.76068	YJL144W	1.795	YAL031C	-0.0692894
YBR004C	0.448648	YIL121W	2.71938	YPL088W	1.77444	YAL031W-A	1.28457
YBR007C	0.258682	YOL126C	2.71189	YOR100C	1.77019	YAL032C	-0.0711641
YBR008C	-0.619259	YFR017C	2.71128	YOR273C	1.75529	YAL033W	-0.289963
YBR009C	0.684879	YBR182C	2.70543	YLR151C	1.7501	YAL034C-B	1.85709
YBR011C	-1.06742	YDR533C	2.68631	YGR174W-A	1.7316	YAL034C	0.62743
YBR014C	0.0784052	YGR292W	2.68614	YGR256W	1.7227	YAL034W-A	-0.347503
YBR015C	-0.607488	YOR382W	2.67401	YIL117C	1.71568	YAL035W	-0.279759
YBR017C	-0.450588	YKL164C	2.65637	YJL038C	1.71433	YAL036C	-0.197049
YBR023C	0.373383	YJR073C	2.65377	YOR347C	1.71371	YAL037C-A	0.40373
YBR025C	-0.478801	YDL244W	2.64568	YBR132C	1.71184	YAL037C-B	-0.266936
YBR026C	0.644384	YDR055W	2.64525	YDR055W	1.71097	YAL037W	1.91787
YBR028C	-1.35413	YLR149C	2.64517	YLR194C	1.70606	YAL038W	-0.387351
YBR029C	0.394924	YAR035W	2.61008	YIL099W	1.69952	YAL039C	-0.299417
YBR034C	0.212784	YER054C	2.60647	YOR185C	1.69661	YAL040C	-0.267718
YBR035C	0.484129	YBR299W	2.59931	YFL052W	1.6958	YAL041W	-0.235807
YBR036C	0.324163	YER103W	2.58951	YCR091W	1.69037	YAL042C-A	1.7349
YBR037C	0.365065	YPR002W	2.58361	YMR103C	1.65749	YAL042W	-0.407081
YBR042C	-0.439798	YGR153W	2.55235	YOL155C	1.6518	YAL043C	-0.244061
YBR043C	0.14201	YBR071W	2.54974	YLL039C	1.64637	YAL044C	-0.298371
YBR044C	-0.541332	YOR306C	2.54346	YER062C	1.64239	YAL044W-A	0.193408
YBR045C	0.21923	YDR391C	2.54212	YMR170C	1.64131	YAL045C	1.07423
YBR046C	0.213417	YJR096W	2.53927	YIL111W	1.63394	YAL046C	-0.286344
YBR049C	-0.566674	YJR156C	2.52216	YOR161C	1.62865	YAL047C	0.590426
YBR052C	0.596815	YFR026C	2.51923	YDR001C	1.61566	YAL047W-A	2.55645
YBR053C	0.618075	YNL274C	2.5065	YNR064C	1.60483	YAL048C	1.1538
YBR055C	-0.752579	YPL017C	2.4827	YDR059C	1.60454	YAL049C	0.0530496
YBR057C	-0.49105	YJR094C	2.46166	YLR297W	1.60384	YAL051W	0.23974
YBR058C	-0.398189	YKL217W	2.44642	YKL133C	1.59645	YAL053W	-0.265911
YBR058C-A	0.607727	YPL272C	2.44298	YPL250C	1.59268	YAL054C	0.0850578
YBR059C	0.032472	YMR105C	2.41494	YPL189C-A	1.59124	YAL055W	-0.127713
YBR060C	-0.531616	YOR220W	2.39927	YER079W	1.57735	YAL056C-A	2.20059
YBR061C	0.266242	YOR202W	2.39919	YJL155C	1.5756	YAL056W	-0.102268
YBR062C	0.169046	YHL021C	2.37604	YGR087C	1.56279	YAL058W	0.384607
YBR065C	-0.0712681	YIL117C	2.36933	YBL064C	1.55906	YAL059C-A	0.458232
YBR066C	0.156941	YBR033W	2.36433	YGR161C	1.55798	YAL059W	-0.377147
YBR067C	-0.390057	YBR147W	2.36361	YBR076W	1.55784	YAL060W	-0.0347665
YBR068C	-0.173431	YKL065C	2.35919	YLL026W	1.55402	YAL061W	-0.441274
YBR069C	-0.617775	YNL289W	2.35756	YMR096W	1.55112	YAL062W	0.550397
YBR070C	0.151576	YDR171W	2.34575	YBR214W	1.54808	YAL063C-A	1.62855
YBR077C	0.0408726	YDR525W-A	2.33077	YPL110C	1.54683	YAL063C	2.14109
YBR079C	-0.289826	YCL064C	2.32918	YBR056W-A	1.54338	YAL064C-A	2.35388
YBR080C	-0.352668	YOR185C	2.32695	YNR066C	1.53806	YAL064W-B	1.15731
YBR081C	-0.499579	YGR032W	2.30751	YMR251W-A	1.52448	YAL064W	2.7953
YBR082C	-0.164377	YOR036W	2.30381	YIL169C	1.51565	YAL065C	2.04995
YBR084C-A	-0.703044	YOL055C	2.30333	YKR061W	1.51564	YAL066W	4.2332
YBR085C-A	1.49552	YML054C	2.30176	YER077C	1.5127	YAL067C	1.0687
YBR086C	-0.752465	YMR196W	2.29987	YGL194C	1.50868	YAL067W-A	-1.5391
YBR088C	0.399746	YKL151C	2.28553	YOL126C	1.50847	YAL068C	1.21773
YBR089C-A	-0.0396553	YGR052W	2.25462	YNR001C	1.5047	YAL068W-A	Inf
YBR091C	0.447345	YPR005C	2.24683	YHR104W	1.50357	YAL069W	1.5864
YBR092C	0.122794	YCR098C	2.24505	YGR205W	1.49104	YAR002C-A	-0.380622
YBR093C	-0.544353	YIL073C	2.23951	YIL155C	1.48363	YAR002W	-0.236475
YBR095C	0.301276	YER079W	2.23787	YNL160W	1.4727	YAR003W	0.857227
YBR101C	-0.243298	YPR001W	2.23497	YGR070W	1.46704	YAR007C	-0.4099
YBR102C	-0.323036	YLL039C	2.23118	YMR135C	1.46686	YAR008W	0.0721525
YBR105C	1.12901	YJL159W	2.2238	YOR036W	1.45471	YAR009C	0.661809
YBR107C	0.0613337	YOR052C	2.22024	YOR062C	1.45077	YAR010C	-0.445143
YBR109C	0.468432	YDL241W	2.21007	YDR391C	1.44825	YAR014C	-0.237674
YBR111C	0.321064	YKR097W	2.17041	YDR074W	1.44051	YAR015W	-0.249494
YBR112C	-0.343102	YLR225C	2.15158	YDR277C	1.43176	YAR018C	0.520711
YBR115C	-0.523789	YDL021W	2.13976	YER035W	1.42988	YAR019C	-0.263303
YBR120C	0.154863	YDR059C	2.13889	YGR153W	1.42863	YAR019W-A	0.415037
YBR121C	-0.397178	YPR151C	2.13844	YKR076W	1.42827	YAR020C	2.68173
YBR122C	0.153735	YLR438W	2.13818	YIL113W	1.42512	YAR023C	2.81938
YBR123C	-0.487032	YNR066C	2.13406	YDL024C	1.41449	YAR027W	-0.107387
YBR125C	-0.35358	YGR138C	2.12332	YDL234C	1.40954	YAR028W	0.0823789
YBR126C	0.817977	YCL035C	2.11827	YNL200C	1.40202	YAR029W	1.2555
YBR127C	-0.378946	YDR119W-A	2.10764	YDL218W	1.39713	YAR030C	1.21777
YBR128C	0.219528	YDR343C	2.09438	YHR033W	1.39526	YAR031W	-0.0844181
YBR129C	-0.567697	YOR273C	2.09161	YIL107C	1.39423	YAR033W	0.202713
YBR130C	-0.0830714	YLR151C	2.08913	YLR270W	1.39029	YAR035C-A	Inf
YBR132C	0.820664	YBR214W	2.08561	YNL289W	1.38424	YAR035W	-0.359526
YBR133C	-0.748648	YMR251W-A	2.0846	YGR149W	1.38257	YAR042W	-0.245524
YBR138C	0.270581	YDR342C	2.08425	YKL217W	1.37133	YAR047C	NA
YBR140C	-0.53819	YAL034C	2.08078	YLR446W	1.36801	YAR050W	0.94491
YBR141C	-0.153105	YMR291W	2.0646	YEL060C	1.36431	YAR053W	1.23819
YBR143C	0.0120625	YKL068W-A	2.05751	YGR052W	1.36061	YAR060C	2.44083
YBR150C	-0.127982	YPL119C	2.04672	YJL133C-A	1.36028	YAR061W	2.15858
YBR154C	0.0984447	YLL026W	2.04656	YMR271C	1.3549	YAR064W	3.95273
YBR156C	0.0629595	YPL052W	2.03746	YNL100W	1.34843	YAR066W	NA
YBR157C	-0.891291	YBR169C	2.0321	YMR315W	1.34827	YAR068W	2.44924
YBR162C	0.321623	YLR121C	2.02724	YPR151C	1.33976	YAR069C	-0.169358
YBR164C	0.125288	YDR001C	2.02712	YDL199C	1.33779	YAR070C	-1.90995
YBR166C	0.269004	YOR177C	2.02383	YOL113W	1.33634	YAR071W	-1.04341
YBR167C	0.714066	YNL305C	1.99729	YDR379C-A	1.33113	YAR073W	0.442852
YBR169C	1.05185	YCR005C	1.99387	YCL035C	1.32576	YAR075W	0.772447
YBR170C	-0.199078	YMR090W	1.9924	YKL093W	1.32429	YBL001C	-0.365033
YBR172C	-0.662859	YHR030C	1.96093	YGL248W	1.31682	YBL002W	-0.461251
YBR173C	0.720017	YNL015W	1.95729	YGR292W	1.31283	YBL003C	-0.773481
YBR177C	0.761331	YML042W	1.95129	YLR345W	1.29581	YBL004W	-0.321888
YBR179C	-0.332671	YER096W	1.95004	YOR298C-A	1.29521	YBL005W-B	-0.024103
YBR181C	-0.549944	YDL072C	1.94466	YMR175W	1.29409	YBL005W	0.710246
YBR182C	2.25276	YFL030W	1.93866	YDR058C	1.29184	YBL006C	-0.104269
YBR185C	0.191179	YPL189C-A	1.92942	YKL065C	1.29131	YBL006W-A	1.11793
YBR188C	0.71153	YGR189C	1.92655	YFL020C	1.28902	YBL007C	-0.456525
YBR193C	0.277322	YNL200C	1.92577	YLR414C	1.2862	YBL008W-A	1.35215
YBR195C	-0.477496	YMR136W	1.92472	YEL049W	1.28233	YBL008W	-0.0441036
YBR196C	0.176867	YMR011W	1.92402	YNL015W	1.2812	YBL009W	-0.33506
YBR197C	-0.253167	YCL012C	1.91904	YBR006W	1.27739	YBL010C	0.715583
YBR198C	-0.46501	YPL111W	1.91875	YFL053W	1.27468	YBL011W	-0.0283824
YBR204C	0.443243	YDL110C	1.91541	YGR194C	1.26439	YBL012C	-1.65715
YBR208C	1.46087	YOR208W	1.91529	YJL057C	1.26241	YBL013W	0.722767
YBR211C	-0.0720875	YOR019W	1.91075	YOR220W	1.26131	YBL014C	0.29308
YBR216C	-0.389862	YDL199C	1.9062	YDL110C	1.25879	YBL015W	0.0753228
YBR218C	-0.0282887	YDR497C	1.89319	YOR338W	1.25864	YBL016W	-0.367015
YBR221C	-0.477236	YIL107C	1.88983	YDL215C	1.25399	YBL017C	0.519801
YBR222C	0.346413	YJL155C	1.88565	YJR096W	1.25264	YBL018C	0.124569
YBR223C	-0.0818877	YNL009W	1.88329	YGR138C	1.25156	YBL018C	-0.765713
YBR229C	-0.399382	YJL217W	1.88167	YML091C	1.24913	YBL019W	1.31102
YBR230C	0.843238	YBR005W	1.876	YMR053C	1.24495	YBL020W	0.487189
YBR231C	0.245683	YGL037C	1.86996	YBR105C	1.24307	YBL021C	0.0757023
YBR234C	0.346485	YKR046C	1.86838	YPR026W	1.24123	YBL022C	-0.321174
YBR236C	0.0318369	YOR223W	1.85668	YDL022W	1.24093	YBL023C	-0.31941
YBR238C	0.192879	YMR120C	1.85348	YOR208W	1.23888	YBL024W	-0.405533
YBR239C	-0.104267	YLR080W	1.84326	YKL107W	1.22732	YBL025W	1.62672
YBR240C	1.01171	YGR146C	1.84025	YBR054W	1.22438	YBL026W	-0.141635
YBR241C	1.07484	YKR049C	1.83751	YIL045W	1.22208	YBL026W	0.551995
YBR243C	-0.37537	YKL161C	1.79908	YGR174C	1.22023	YBL027W	-0.491253
YBR245C	-0.45943	YPR154W	1.79731	YDL124W	1.21896	YBL027W	0.476454
YBR247C	-0.228364	YLR270W	1.79549	YLR177W	1.21218	YBL028C	-0.314128
YBR248C	-0.20189	YPL092W	1.7866	YBR149W	1.21218	YBL029C-A	-0.0367905
YBR249C	-0.539088	YDR242W	1.78437	YHR138C	1.20857	YBL029W	0.028531
YBR254C	0.605675	YDR019C	1.78045	YJR073C	1.20614	YBL030C	-0.215955
YBR255C-A	-0.131647	YBL064C	1.78008	YGR108W	1.20154	YBL031W	-0.0495411
YBR256C	0.638495	YLR174W	1.77825	YJL106W	1.1963	YBL032W	-0.547295
YBR258C	1.59583	YER011W	1.77788	YGR110W	1.19133	YBL033C	-0.304856
YBR260C	-0.219445	YCR083W	1.76932	YPL070W	1.18402	YBL034C	-0.436715
YBR261C	0.252366	YLR356W	1.76795	YHR030C	1.18366	YBL035C	-0.0346997
YBR262C	1.25165	YKL133C	1.76714	YBR230W-A	1.18246	YBL036C	-0.0166253
YBR264C	0.0828799	YGL248W	1.73533	YIR039C	1.18166	YBL037W	-0.12722
YBR269C	1.01255	YLR258W	1.73506	YKL091C	1.17264	YBL038W	-0.558042
YBR270C	-0.0131692	YPL163C	1.73475	YDR019C	1.17216	YBL039C-A	NA
YBR272C	0.131104	YBL015W	1.73279	YBR085C-A	1.17169	YBL039C	-0.347353
YBR273C	0.410896	YKL142W	1.73165	YKL062W	1.16608	YBL039W-B	0.595288
YBR275C	-0.703134	YHR097C	1.72992	YDR231C	1.1633	YBL040C	-0.304055
YBR276C	-0.402672	YIL045W	1.724	YIL050W	1.16276	YBL040C	0.701902
YBR280C	0.691194	YER026C	1.72344	YML089C	1.16174	YBL041W	-0.170725
YBR281C	-0.317815	YPR184W	1.71793	YLR225C	1.1615	YBL042C	-0.189781
YBR283C	-0.435455	YIR028W	1.71763	YOL159C	1.15532	YBL043W	-0.335073
YBR288C	0.162416	YDL124W	1.71612	YIL087C	1.15526	YBL044W	1.26912
YBR291C	0.811673	YNL065W	1.70451	YOR052C	1.15458	YBL045C	-0.276287
YBR296C	2.00234	YLR120C	1.70326	YPL123C	1.15306	YBL046W	-0.115014
YBL102W	0.463199	YGR247W	1.69961	YNL293W	1.1527	YBL047C	-0.413484
YBL099W	-0.20764	YPR127W	1.69578	YKL142W	1.15066	YBL048W	0.0837889
YBL098W	-0.805843	YLR300W	1.68187	YML117W	1.14933	YBL049W	-0.271146
YBL097W	-0.812073	YMR135C	1.68099	YBR295W	1.14552	YBL050W	-0.412646
YBL095W	-0.614344	YPL159C	1.68057	YPL113C	1.14343	YBL050W	0.583822
YBL092W	-0.732063	YDR247W	1.68038	YDR448W	1.14106	YBL051C	-0.256331
YBL090W	0.803417	YER035W	1.66821	YJL079C	1.14099	YBL052C	0.198374
YBL089W	-0.276471	YNL195C	1.66798	YER084W	1.13942	YBL053W	1.54005
YBL085W	-0.656767	YPL135W	1.65883	YLR121C	1.13579	YBL054W	-0.180956
YBL081W	-0.556731	YIL066C	1.65784	YOR177C	1.12893	YBL055C	-0.139043
YBL079W	-0.829673	YER045C	1.6577	YDL079C	1.12746	YBL056W	-0.284308
YBL071W-A	0.178558	YLR271W	1.65758	YOL082W	1.12743	YBL057C	-0.278862
YBL068W	-0.0571672	YGR282C	1.64821	YGR224W	1.12627	YBL058W	-0.222518
YBL063W	-0.62221	YHR104W	1.64714	YGL032C	1.12609	YBL059C-A	-0.085565
YBL060W	-0.204521	YLR390W-A	1.64318	YJL159W	1.12274	YBL059C-A	0.283882
YBL059W	0.350146	YPR149W	1.63779	YGR230W	1.11867	YBL059W	-0.376361
YBL058W	-0.0436953	YJR097W	1.63432	YML042W	1.11688	YBL059W	0.642168
YBL056W	0.0104708	YLR297W	1.62911	YCL038C	1.11661	YBL060W	1.68736
YBL054W	0.0440888	YER024W	1.62585	YGL081W	1.1158	YBL061C	-0.370527
YBL050W	0.350088	YKL091C	1.61911	YBR241C	1.10956	YBL062W	-0.644659
YBL046W	0.20257	YJL171C	1.61782	YOR223W	1.10864	YBL063W	-0.104646
YBL041W	0.701826	YLR136C	1.61657	YDR258C	1.10583	YBL064C	0.593591
YBL038W	0.083191	YJR152W	1.61329	YOL048C	1.09996	YBL065W	0.633986
YBL037W	-0.475337	YLR361C-A	1.61186	YDL072C	1.09478	YBL066C	-0.148026
YBL032W	-0.0970871	YKR061W	1.61022	YBR071W	1.09472	YBL067C	-0.355208
YBL031W	-0.239528	YNR007C	1.60933	YLL060C	1.09231	YBL068W-A	-0.491243
YBL029W	-0.674408	YJR161C	1.59762	YFL024C	1.09061	YBL068W	-0.424738
YBL027W	-0.665877	YOR062C	1.59748	YEL041W	1.08859	YBL069W	-0.345627
YBL026W	0.317766	YOL159C	1.59654	YBR296C	1.08798	YBL070C	2.6748
YBL024W	-0.00862546	YLR408C	1.59645	YDR358W	1.08455	YBL071C-B	1.36436
YBL020W	-0.134117	YLR350W	1.58832	YIL097W	1.08187	YBL071C	0.575484
YBL019W	-0.204559	YBL029C-A	1.58643	YFL030W	1.0795	YBL071W-A	1.23963
YBL016W	-0.425503	YDR163W	1.58363	YKL150W	1.07721	YBL072C	-0.488937
YBL015W	0.831324	YAL053W	1.57154	YOL016C	1.07579	YBL072C	0.0179542
YBL011W	-0.573231	YCL049C	1.57101	YKR049C	1.07461	YBL073W	-0.361706
YBL009W	-0.157922	YDL248W	1.57035	YBR138C	1.07456	YBL074C	2.3177
YBL008W	-0.47094	YJL166W	1.57008	YIL065C	1.06922	YBL075C	2.16653
YBL005W	-0.259152	YBR132C	1.56364	YDL119C	1.06893	YBL076C	-0.315907
YBL004W	-0.981327	YPL110C	1.56258	YDR163W	1.06852	YBL077W	-1.28296
YBL002W	-0.0624214	YDR258C	1.55399	YDR461W	1.06706	YBL078C	0.193314
YBR003W	0.0128621	YHR033W	1.55236	YGR030C	1.06643	YBL079W	-0.215706
YBR005W	1.61106	YMR034C	1.55129	YKL151C	1.06428	YBL080C	-0.196578
YBR006W	2.65154	YIR034C	1.54829	YDR453C	1.05645	YBL081W	-0.205544
YBR010W	0.69914	YNR058W	1.5456	YDR461C-A	1.05147	YBL082C	0.671369
YBR016W	0.622631	YOL147C	1.54019	YER162C	1.05074	YBL083C	0.709564
YBR021W	-0.491888	YPL123C	1.53949	YHR096C	1.05022	YBL084C	-0.359432
YBR022W	0.233915	YNL014W	1.53527	YOR306C	1.04953	YBL085W	-0.226501
YBR024W	1.00142	YMR315W	1.5212	YER045C	1.0494	YBL086C	-0.0682383
YBR030W	-0.721818	YBR295W	1.52054	YKL121W	1.04867	YBL087C	-0.518686
YBR031W	-0.725118	YGR019W	1.51786	YMR181C	1.04856	YBL087C	0.413772
YBR033W	1.51407	YOL071W	1.51539	YDL160C	1.04814	YBL088C	1.51284
YBR038W	-0.391464	YIR038C	1.51513	YOR028C	1.04414	YBL089W	0.172172
YBR039W	0.332969	YDR406W	1.50734	YHR001W-A	1.03309	YBL090W	-0.584394
YBR041W	-0.0602813	YNR001C	1.50664	YKL109W	1.03219	YBL091C-A	0.0715173
YBR047W	0.229344	YOL109W	1.50649	YPL119C	1.03093	YBL091C-A	0.796415
YBR048W	-0.877138	YKR076W	1.50643	YJL052W	1.03084	YBL091C	-0.291891
YBR054W	-0.128368	YBR183W	1.49308	YOR020W-A	1.02846	YBL092W	-0.434648
YBR056W	0.512344	YBR258C	1.4919	YMR101C	1.02773	YBL092W	-0.0263244
YBR056W-A	4.01632	YOR032C	1.49032	YLR254C	1.02391	YBL093C	-0.113091
YBR071W	1.22732	YGL010W	1.48634	YHR152W	1.02373	YBL094C	0.833493
YBR072W	3.98835	YGR161W-C	1.48626	YOR137C	1.02215	YBL095W	-0.292691
YBR073W	0.0238858	YOR020W-A	1.48592	YDR031W	1.02005	YBL096C	1.86547
YBR074W	-0.818716	YMR053C	1.48384	YER124C	1.01991	YBL097W	-0.464479
YBR078W	-0.342972	YDR179C	1.48145	YKL162C	1.01818	YBL098W	-0.301598
YBR083W	-0.209243	YIR019C	1.47277	YMR197C	1.0155	YBL099W	-0.381759
YBR084W	-0.976102	YDL233W	1.47271	YPL017C	1.0069	YBL100C	1.4324
YBR085W	0.748682	YOL108C	1.47256	YML118W	1.005	YBL100W-B	0.851772
YBR087W	0.198753	YBR105C	1.46839	YDR381C-A	1.004	YBL100W-C	-0.0306511
YBR094W	-0.305424	YBR230W-A	1.46554	YMR219W	1.00207	YBL101C	-0.123742
YBR096W	0.560669	YMR122W-A	1.46436	YEL073C	1.00022	YBL102W	-0.286202
YBR097W	-0.642263	YER053C	1.46407	YAL062W	0.997682	YBL103C	-0.22195
YBR098W	-0.238976	YPL170W	1.46391	YGR235C	0.996896	YBL104C	0.109904
YBR103W	-0.170673	YFR003C	1.4598	YLR205C	0.996484	YBL105C	-0.332652
YBR104W	-0.219645	YHR001W-A	1.45785	YNR065C	0.996335	YBL106C	0.152518
YBR106W	-0.636673	YNR065C	1.45612	YPR036W-A	0.995799	YBL107C	0.413468
YBR108W	0.100285	YGL045W	1.45369	YLR168C	0.995699	YBL107W-A	0.372786
YBR110W	-0.0749895	YML100W	1.45287	YER158C	0.994841	YBL108C-A	1.38656
YBR111W-A	0.412668	YBR016W	1.44868	YLL057C	0.994479	YBL108W	NA
YBR114W	0.285692	YCL040W	1.44685	YPL089C	0.991984	YBL109W	2.36493
YBR118W	-0.505613	YDR358W	1.44043	YBL029C-A	0.991328	YBL111C	NA
YBR119W	-0.451999	YBR076C-A	1.43952	YBR299W	0.987486	YBL111C	2.31786
YBR131W	-0.430917	YIL087C	1.42969	YNL117W	0.987286	YBL112C	2.54358
YBR135W	0.235686	YGR023W	1.42866	YIL023C	0.986364	YBL113C	1.48118
YBR136W	-0.763406	YKL193C	1.42534	YJR056C	0.982864	YBL113W-A	2.7334
YBR137W	0.258362	YLR068W	1.42497	YNL305C	0.981418	YBR001C	-0.2388
YBR139W	1.03652	YKL087C	1.42209	YBR147W	0.98133	YBR002C	-0.403044
YBR142W	-0.33722	YGR142W	1.41807	YGR225W	0.978992	YBR003W	-0.223192
YBR145W	0.275009	YOR328W	1.41394	YPL168W	0.975666	YBR004C	0.698847
YBR146W	-0.0691618	YDL067C	1.41108	YLR356W	0.974046	YBR005W	-0.130745
YBR147W	2.09178	YOR161C	1.40949	YFR014C	0.973031	YBR006W	0.0447626
YBR148W	0.0668013	YBR269C	1.40635	YNL058C	0.96831	YBR007C	-0.0514027
YBR149W	1.12583	YHL036W	1.40102	YOR343C	0.96793	YBR008C	1.82526
YBR151W	-0.0104396	YMR197C	1.39971	YOL071W	0.967928	YBR009C	-0.440948
YBR152W	-0.7183	YFR015C	1.39956	YMR056C	0.967562	YBR010W	-0.804552
YBR153W	-0.461585	YGR035C	1.39781	YDL181W	0.964678	YBR011C	-0.414297
YBR155W	-0.0468811	YIL097W	1.39715	YDR516C	0.96205	YBR012C	NA
YBR158W	-0.925846	YHR043C	1.38014	YBL063W	0.960931	YBR012W-B	-3.14827
YBR159W	-0.0111639	YKL049C	1.37695	YGR053C	0.960031	YBR013C	NA
YBR160W	-0.00029312	YIR039C	1.37229	YHR097C	0.959954	YBR014C	-0.11319
YBR161W	0.117408	YMR008C	1.35293	YNL265C	0.959837	YBR015C	-0.324389
YBR162W-A	0.287688	YDR085C	1.35275	YIL055C	0.958208	YBR016W	-0.497146
YBR163W	-0.291145	YDR379C-A	1.35191	YML119W	0.956699	YBR017C	-0.293942
YBR165W	0.137755	YPL271W	1.3495	YMR100W	0.956469	YBR018C	1.71903
YBR168W	-0.358118	YIL108W	1.34946	YOL083W	0.955167	YBR019C	0.582733
YBR171W	0.127399	YBR280C	1.34697	YAL028W	0.950786	YBR020W	1.74153
YBR175W	0.220831	YMR295C	1.3411	YNL277W-A	0.946948	YBR021W	-0.0785191
YBR176W	0.0232326	YKL124W	1.33749	YMR194C-B	0.946452	YBR022W	-0.306665
YBR183W	1.54815	YIL011W	1.33471	YBR269C	0.94409	YBR023C	-0.301306
YBR184W	-0.142929	YJR154W	1.33235	YBL091C-A	0.940454	YBR024W	-0.288339
YBR187W	-0.298957	YBR139W	1.33088	YPL026C	0.939377	YBR025C	-0.28655
YBR189W	-0.556976	YHR142W	1.32591	YNR007C	0.93884	YBR026C	-0.421442
YBR192W	-0.52245	YGR149W	1.32178	YBR139W	0.93867	YBR027C	0.744758
YBR194W	0.129186	YNL192W	1.32152	YAL054C	0.938562	YBR028C	0.267424
YBR199W	0.263908	YNL208W	1.31557	YDL139C	0.937579	YBR029C	-0.361568
YBR200W	-0.251518	YNL012W	1.30325	YKR077W	0.933617	YBR030W	1.42871
YBR201W	0.786422	YNL058C	1.30243	YGR023W	0.933058	YBR031W	-0.396259
YBR202W	-0.396338	YGL194C	1.29939	YAL017W	0.929017	YBR032W	#NAME?
YBR203W	0.803526	YML118W	1.29647	YPR045C	0.928757	YBR033W	0.787137
YBR205W	-0.493237	YLR107W	1.29347	YHR016C	0.926409	YBR034C	-0.291708
YBR207W	0.21189	YNL157W	1.29338	YER111C	0.925476	YBR035C	-0.440024
YBR210W	0.208678	YDL119C	1.29282	YIL108W	0.924362	YBR036C	-0.28303
YBR212W	-0.184664	YBR241C	1.29227	YPR002W	0.923311	YBR037C	-0.484558
YBR213W	-0.587393	YDR031W	1.28271	YPR075C	0.922703	YBR038W	-0.323113
YBR214W	1.38124	YOL014W	1.28175	YHR132W-A	0.922304	YBR039W	-0.461975
YBR215W	-0.103689	YLR168C	1.28076	YDR247W	0.919049	YBR040W	1.17767
YBR217W	-0.0872479	YLL023C	1.27818	YNL223W	0.918623	YBR041W	-0.345316
YBR225W	0.103946	YMR184W	1.27817	YGR247W	0.91859	YBR042C	-0.225534
YBR228W	-0.0965309	YIL050W	1.27685	YGR254W	0.916152	YBR043C	2.15202
YBR230W-A	1.03111	YLR298C	1.27634	YKL164C	0.916009	YBR044C	0.204155
YBR233W	-0.0658249	YKL162C	1.27444	YLR284C	0.914726	YBR045C	1.92807
YBR233W-A	-0.0981531	YIR011C	1.27023	YNL237W	0.914045	YBR046C	-0.27745
YBR235W	-0.0198342	YGL180W	1.26881	YJL132W	0.913756	YBR047W	0.215321
YBR237W	0.031913	YJL016W	1.26597	YKL071W	0.912239	YBR048W	-0.351309
YBR242W	-0.0976592	YBR054W	1.26232	YGR146C	0.911566	YBR048W	0.859795
YBR244W	0.323006	YKL104C	1.25923	YOR386W	0.907698	YBR049C	-0.279171
YBR246W	-0.144045	YDL215C	1.25729	YLR300W	0.903649	YBR050C	1.058
YBR251W	0.0741908	YER158C	1.25518	YMR040W	0.901684	YBR051W	1.96923
YBR252W	-0.120867	YBR208C	1.25478	YBR056W	0.899496	YBR052C	-0.506312
YBR253W	-0.166463	YJL132W	1.25271	YBL075C	0.897281	YBR053C	0.03449
YBR255W	-0.0474776	YHR071W	1.25265	YGL096W	0.896603	YBR054W	-0.0930974
YBR257W	0.223592	YLR204W	1.25233	YBL059W	0.896258	YBR055C	1.28662
YBR259W	-0.342389	YDL079C	1.24891	YBR150C	0.894976	YBR056C-B	0.508478
YBR263W	-0.531365	YHR006W	1.24102	YPR001W	0.893184	YBR056W-A	-0.0669878
YBR265W	-0.256995	YNL133C	1.23771	YBR126C	0.891266	YBR056W	-0.0571649
YBR267W	0.0507027	YOL054W	1.23744	YDR309C	0.890874	YBR057C	-0.172219
YBR268W	0.445202	YJR085C	1.23044	YGR244C	0.888093	YBR058C-A	-0.46755
YBR271W	-0.0309492	YMR030W	1.22766	YIL144W	0.887439	YBR058C	0.375873
YBR274W	-0.270446	YJL103C	1.22499	YOR317W	0.88596	YBR059C	-0.248088
YBR278W	0.324539	YEL012W	1.2226	YMR204C	0.885161	YBR060C	-0.161507
YBR279W	-0.0945144	YNL037C	1.21832	YNL144C	0.884393	YBR061C	0.0762371
YBR282W	0.617053	YIR024C	1.2146	YLR346C	0.8826	YBR062C	0.130852
YBR284W	1.80079	YBR009C	1.21422	YMR210W	0.880861	YBR062C	1.7019
YBR286W	0.0675294	YOL048C	1.20647	YLR390W-A	0.88072	YBR063C	1.28008
YBR287W	0.511657	YIL155C	1.20089	YDR242W	0.880449	YBR064W	3.16244
YBR289W	-0.336375	YHR152W	1.19984	YKL103C	0.879615	YBR065C	1.21733
YBR290W	0.407542	YNR010W	1.19901	YBR203W	0.879611	YBR066C	0.0299338
YBR293W	-0.00961999	YMR020W	1.19744	YER130C	0.877559	YBR067C	-0.214592
YBR295W	1.19209	YKL187C	1.19648	YAL060W	0.877392	YBR068C	-0.267492
YBR297W	0.533265	YIL059C	1.19417	YDR100W	0.874334	YBR069C	-0.273843
YBR299W	2.80188	YDR058C	1.19179	YIL119C	0.873615	YBR070C	0.273668
YCL064C	3.41403	YHR140W	1.1911	YML120C	0.87191	YBR071W	-0.46513
YCL061C	-0.620814	YDR277C	1.19008	YLR006C	0.871543	YBR072C-A	-1.60739
YCL059C	0.309407	YBR149W	1.18973	YJL066C	0.865926	YBR072W	-0.68493
YCL057C-A	0.143241	YER077C	1.18808	YPL196W	0.864982	YBR073W	0.0521084
YCL056C	0.284379	YMR056C	1.18697	YBR052C	0.863527	YBR074W	0.588285
YCL052C	0.0996431	YDR178W	1.18352	YPL166W	0.862875	YBR076C-A	1.30049
YCL050C	-0.169125	YPR075C	1.18297	YOR385W	0.861166	YBR076W	-0.00483501
YCL049C	1.42497	YHL048W	1.18124	YKR046C	0.858486	YBR077C	0.696467
YCL047C	-0.232789	YHR061C	1.17867	YMR031C	0.854763	YBR078W	-0.370513
YCL045C	-0.303655	YIL065C	1.17766	YJR052W	0.854371	YBR078W	-0.356953
YCL044C	-0.205446	YNL030W	1.17583	YNR014W	0.854163	YBR079C	-0.304738
YCL043C	-0.058195	YJR052W	1.17535	YHL036W	0.853982	YBR080C	-0.417232
YCL041C	-0.0880643	YJL163C	1.1748	YGR130C	0.850473	YBR081C	-0.390774
YCL038C	1.08681	YLR275W	1.17381	YGL087C	0.850045	YBR082C	-0.242696
YCL037C	-0.00354282	YFL057C	1.17031	YIL017C	0.84922	YBR082C	-0.514371
YCL035C	1.11834	YLR446W	1.16956	YDL115C	0.84813	YBR083W	0.339626
YCL033C	1.04476	YER034W	1.16703	YJL166W	0.847028	YBR084C-A	-0.345866
YCL031C	0.310981	YGR097W	1.16685	YDR525W-A	0.846661	YBR084C-A	1.08059
YCL030C	-0.0248709	YOL113W	1.16646	YML062C	0.844735	YBR084W	-0.305831
YCL029C	-0.0174964	YGL184C	1.16612	YBR262C	0.842667	YBR085C-A	0.610335
YCL026C-B	-0.434318	YHR146W	1.16391	YIR038C	0.842105	YBR085W	0.8746
YCL025C	0.807693	YOR298C-A	1.16203	YBR211C	0.84187	YBR086C	-0.229118
YCL017C	0.00853949	YMR280C	1.16144	YKL185W	0.84172	YBR087W	0.0275376
YCL016C	0.0127021	YCR020C	1.15996	YNL133C	0.837339	YBR088C	-0.53163
YCL012C	1.3583	YGR137W	1.15977	YBR230C	0.836586	YBR089C-A	-0.300375
YCL011C	-0.250733	YHR018C	1.1569	YIL077C	0.836498	YBR089C-A	0.788417
YCL010C	-0.284521	YPL089C	1.15478	YPR061C	0.836012	YBR089W	1.89611
YCL009C	-0.293385	YGR244C	1.15366	YKR011C	0.835255	YBR090C	-1.08185
YCL008C	-0.332399	YMR180C	1.15136	YLR204W	0.835021	YBR090C	1.14033
YCL002C	-0.387136	YLL055W	1.14814	YMR120C	0.833917	YBR091C	-0.420308
YCR002C	0.216737	YMR311C	1.14677	YMR041C	0.833236	YBR092C	0.0789911
YCR004C	0.0444871	YJL066C	1.14564	YJL099W	0.828965	YBR093C	-0.758148
YCR005C	1.432	YBR010W	1.14528	YLR120C	0.828098	YBR094W	0.326071
YCR007C	1.06953	YMR238W	1.14491	YBR284W	0.827867	YBR095C	-0.306075
YCR009C	0.365007	YDR030C	1.14261	YHR043C	0.827427	YBR096W	-0.34951
YCR011C	-0.276045	YKL041W	1.14207	YGR097W	0.827083	YBR097W	-0.254954
YCR014C	-0.0158248	YKR011C	1.13754	YBR290W	0.82675	YBR098W	1.17681
YCR015C	0.203723	YDR224C	1.12921	YIL066C	0.823697	YBR099C	1.00312
YCR017C	-0.310752	YMR114C	1.12914	YDR513W	0.822238	YBR101C	-0.170275
YCR020C	1.26078	YBR262C	1.1264	YPL222W	0.821292	YBR102C	0.513179
YCR020C-A	0.298591	YLR370C	1.1246	YDL113C	0.818542	YBR103C-A	0.727746
YCR021C	4.08919	YDR461C-A	1.12408	YDR351W	0.818427	YBR103W	0.215574
YCR023C	-0.684732	YJL082W	1.12101	YGL191W	0.815522	YBR104W	-0.149103
YCR024C	-0.16078	YKR080W	1.11667	YBR280C	0.814773	YBR105C	-0.553988
YCR024C-A	-0.745805	YGR063C	1.11461	YPR193C	0.814302	YBR106W	-0.508797
YCR026C	-0.365554	YJL151C	1.11419	YFR019W	0.813623	YBR107C	0.93677
YCR027C	0.0399678	YDR074W	1.11371	YPL067C	0.81004	YBR108W	-0.0666544
YCR028C	-0.363293	YPL175W	1.11256	YDR104C	0.809473	YBR109C	-0.110171
YCR028C-A	-0.110136	YLR147C	1.11016	YHR023W	0.805744	YBR109W-A	0.66721
YCR030C	0.0323756	YKR009C	1.11013	YLL019C	0.804833	YBR110W	-0.109923
YCR031C	-0.667536	YGL191W	1.1086	YPL159C	0.803036	YBR111C	-0.2246
YCR035C	-0.0743922	YLR284C	1.10796	YDR014W-A	0.802797	YBR111W-A	-0.192932
YCR037C	-0.0699902	YLR299W	1.10427	YER098W	0.802397	YBR111W-A	1.14092
YCR038C	-0.160224	YLR250W	1.10206	YDL216C	0.802024	YBR112C	-0.421052
YCR042C	-0.418161	YBR201W	1.102	YJL003W	0.80181	YBR113W	0.137338
YCR043C	-0.171232	YLL041C	1.10136	YGL157W	0.801747	YBR114W	0.499048
YCR044C	0.13814	YHR132W-A	1.10103	YJL082W	0.801739	YBR115C	-0.408751
YCR046C	0.578104	YNL044W	1.10033	YPL014W	0.800948	YBR116C	0.65572
YCR047C	-0.133892	YPR049C	1.09809	YOR227W	0.800884	YBR117C	0.338365
YCR054C	-0.458046	YLL019C	1.09752	YDR529C	0.800638	YBR118W	-0.438183
YCR057C	-0.562414	YER092W	1.09667	YFR008W	0.800503	YBR119W	0.434728
YCR059C	0.0133688	YBR290W	1.0921	YHL010C	0.799802	YBR119W	-0.364755
YCR067C	-0.368532	YPR156C	1.09205	YJL084C	0.798867	YBR120C	-0.541946
YCR071C	0.562138	YGR235C	1.0915	YEL012W	0.798418	YBR121C-A	NA
YCR072C	-0.526933	YBR046C	1.09088	YLL041C	0.797855	YBR121C	-0.416169
YCR073C	1.9242	YOR317W	1.08919	YNL192W	0.797575	YBR122C	-0.479
YCR075C	0.121436	YOL083W	1.08918	YOR114W	0.796735	YBR123C	-0.0833217
YCR076C	0.776377	YDR262W	1.08861	YIR011C	0.796692	YBR124W	5.16406
YCR077C	-0.73983	YCR073C	1.08625	YBR053C	0.794815	YBR125C	-0.155253
YCR084C	-0.217892	YHR044C	1.08108	YFR003C	0.793851	YBR126C	-0.241689
YCR087C-A	0.127574	YCL038C	1.081	YDR289C	0.791528	YBR126W-A	-0.557819
YCR090C	0.265069	YBR230C	1.08075	YBR282W	0.790222	YBR126W-B	-0.155077
YCR092C	-0.719061	YML004C	1.07739	YPL175W	0.784061	YBR127C	-0.424701
YCR095C	0.0525209	YBR024W	1.07379	YLR132C	0.783709	YBR128C	-0.287411
YCR098C	2.16661	YDR275W	1.07203	YBR240C	0.783015	YBR129C	-0.424014
YCR102C	1.12587	YAR027W	1.07163	YGR161W-C	0.781996	YBR130C	-0.444053
YCL063W	-0.54711	YBR056W	1.0714	YLR152C	0.781689	YBR131C-A	NA
YCL058W-A	0.522597	YBR167C	1.07064	YDL044C	0.781412	YBR131W	-0.0601144
YCL057W	-0.47226	YLR460C	1.06913	YPL247C	0.780956	YBR132C	-0.437476
YCL055W	0.39201	YIL023C	1.06868	YBR201C-A	0.7784	YBR133C	0.090327
YCL054W	-0.022631	YPL057C	1.06803	YKL016C	0.7783	YBR134W	1.38623
YCL051W	-0.0226304	YPL213W	1.06079	YJL103C	0.777873	YBR135W	-0.426637
YCL040W	1.17967	YJL049W	1.05955	YGL164C	0.77681	YBR136W	0.365494
YCL039W	0.117706	YLR205C	1.0585	YDL161W	0.776794	YBR137W	-0.328941
YCL036W	-0.619989	YDL065C	1.0556	YLR174W	0.775491	YBR138C	-0.279683
YCL034W	0.238596	YDL129W	1.05549	YCR073C	0.774001	YBR139W	0.0108594
YCL032W	0.546474	YPL225W	1.05291	YDR380W	0.773897	YBR140C	-0.160283
YCL028W	-0.117386	YNL115C	1.0525	YLR408C	0.773178	YBR141C	0.0188451
YCL027W	-0.0120161	YNL223W	1.05151	YMR316W	0.772823	YBR141W-A	4.12474
YCL024W	-0.173958	YER037W	1.04965	YOR290C	0.772713	YBR142W	-0.34841
YCL018W	-1.38746	YOR089C	1.04533	YBR255W	0.770662	YBR143C	-0.270806
YCL014W	-0.743983	YGR110W	1.04484	YMR136W	0.770439	YBR144C	-0.384047
YCL005W-A	0.395385	YOR044W	1.04267	YDR030C	0.76832	YBR145W	-0.0499696
YCL005W	-0.323728	YPL070W	1.04209	YOR107W	0.768103	YBR146W	-0.518688
YCL004W	0.179151	YJR130C	1.04196	YGL010W	0.767185	YBR147W	-0.506967
YCL001W	0.133253	YBL041W	1.037	YMR304W	0.766334	YBR148W	1.49151
YCR003W	0.39568	YKL062W	1.03486	YDR316W	0.766197	YBR149W	-0.332571
YCR008W	-0.573872	YMR077C	1.03045	YER175C	0.763818	YBR150C	-0.312973
YCR012W	-0.668357	YJL036W	1.02731	YJL164C	0.763236	YBR151W	-0.102737
YCR016W	-0.20859	YGR230W	1.02724	YLR271W	0.762552	YBR152W	0.846635
YCR019W	0.196783	YOR357C	1.02492	YNL086W	0.762218	YBR153W	0.127857
YCR020W-B	0.430301	YCL025C	1.0221	YOR104W	0.761396	YBR154C	-0.47436
YCR032W	-0.701821	YFR053C	1.02186	YPL219W	0.760616	YBR155W	-0.139093
YCR033W	-0.653946	YKL219W	1.02089	YOR054C	0.75917	YBR156C	0.658027
YCR034W	-0.576115	YOR003W	1.01979	YOR066W	0.759031	YBR157C	-0.254673
YCR036W	0.783577	YDL123W	1.01947	YOR031W	0.757758	YBR158W	-0.236544
YCR048W	0.0213307	YJL149W	1.01893	YPR154W	0.75766	YBR159W	-0.289956
YCR051W	-0.0127758	YNL092W	1.0153	YDR028C	0.755632	YBR160W	-0.313982
YCR052W	-0.128087	YDL243C	1.01494	YKL012W	0.755268	YBR161W	-0.017527
YCR053W	0.078342	YMR256C	1.01472	YHR006W	0.754561	YBR162C	-0.479137
YCR061W	-0.519298	YNL237W	1.0144	YBR157C	0.754433	YBR162W-A	0.0584053
YCR063W	0.196736	YHR016C	1.0134	YPL267W	0.754385	YBR163W	1.1629
YCR065W	-0.44272	YHL016C	1.0118	YDL233W	0.754311	YBR164C	-0.0669985
YCR066W	-0.487367	YER101C	1.00977	YPL229W	0.754293	YBR165W	-0.33765
YCR068W	-0.350799	YER175C	1.00905	YPR015C	0.751473	YBR166C	-0.276837
YCR069W	0.0153087	YBR203W	1.00694	YGL250W	0.750353	YBR167C	0.478164
YCR073W-A	0.455516	YDL139C	1.0068	YGR067C	0.75	YBR168W	0.859962
YCR075W-A	0.663426	YPL152W	1.00652	YDR383C	0.747742	YBR169C	-0.108234
YCR079W	0.760743	YOR285W	1.00565	YLR294C	0.745976	YBR170C	-0.0471013
YCR081W	-0.639515	YLR381W	1.00476	YLR054C	0.745284	YBR171W	-0.327245
YCR082W	-0.019108	YLR218C	1.00438	YGR189C	0.745231	YBR172C	-0.44038
YCR083W	1.0501	YLR237W	1.00365	YML057W	0.744785	YBR173C	-0.170348
YCR086W	0.120622	YMR052W	1.00239	YBR194W	0.744764	YBR174C	3.12243
YCR088W	0.142455	YKR077W	1.00202	YLL010C	0.744419	YBR175W	0.48107
YCR089W	0.354146	YIL055C	1.00149	YMR184W	0.744112	YBR176W	-0.412094
YCR091W	0.674417	YLR326W	1.00078	YMR122W-A	0.741816	YBR177C	-0.096588
YCR093W	-0.848786	YBR095C	0.999616	YPR020W	0.741411	YBR178W	-0.128042
YCR094W	-0.341601	YMR189W	0.998849	YOL032W	0.738133	YBR179C	-0.0343429
YCR097W	0.2731	YJL057C	0.998317	YHR090C	0.737283	YBR180W	1.93964
YCR106W	-1.05791	YJR103W	0.998208	YDR337W	0.734209	YBR181C	-0.431444
YCR107W	-0.14946	YHR187W	0.99749	YKL167C	0.731907	YBR181C	0.829112
YDL243C	0.572902	YOR252W	0.997205	YDR486C	0.731818	YBR182C-A	1.17875
YDL238C	0.489931	YGR201C	0.994069	YBR120C	0.731639	YBR182C	0.56806
YDL235C	0.374478	YOL031C	0.989015	YGR142W	0.73111	YBR183W	-0.467035
YDL234C	1.44902	YPR079W	0.987286	YHL028W	0.730754	YBR184W	2.17561
YDL231C	-0.319514	YNL265C	0.986766	YDR511W	0.730736	YBR185C	-0.266273
YDL227C	-2.24762	YKL088W	0.986446	YLR079W	0.730276	YBR186W	0.847995
YDL226C	-0.0475348	YPL264C	0.98337	YML027W	0.72994	YBR186W	0.664853
YDL224C	-0.759032	YHR090C	0.981669	YMR052W	0.729491	YBR187W	-0.180971
YDL222C	2.09423	YLR437C	0.976858	YBR007C	0.729338	YBR188C	0.203273
YDL220C	-0.136713	YDL057W	0.973147	YLR042C	0.729235	YBR189W	-0.579892
YDL217C	-0.224841	YLL028W	0.972889	YCL049C	0.727434	YBR189W	0.81589
YDL216C	0.104907	YBR188C	0.969012	YBR258C	0.726045	YBR190W	1.06047
YDL215C	-0.207786	YLR362W	0.968977	YOL069W	0.72521	YBR191W-A	-1.00417
YDL213C	0.227673	YMR041C	0.968973	YLR326W	0.724826	YBR191W	-0.606706
YDL211C	-0.179289	YCL033C	0.961877	YPL242C	0.724662	YBR191W	0.876374
YDL209C	0.0294835	YDL010W	0.960975	YJL070C	0.724439	YBR192W	-0.269371
YDL205C	-0.321599	YLR025W	0.960853	YML129C	0.722683	YBR193C	0.529644
YDL203C	-0.459499	YPR107C	0.958448	YLR392C	0.721791	YBR194W	-0.330614
YDL200C	0.330516	YER029C	0.954747	YLL009C	0.720805	YBR195C	0.91149
YDL199C	1.10393	YKL122C	0.953334	YKL051W	0.720479	YBR196C-A	1.30059
YDL198C	-0.355002	YIL013C	0.952996	YKL159C	0.720259	YBR196C-B	0.894751
YDL197C	-0.0278539	YPR098C	0.952294	YDL179W	0.720061	YBR196C	-0.400821
YDL190C	-0.44657	YPL166W	0.951657	YPR107C	0.718456	YBR197C	1.49127
YDL188C	0.0727374	YER002W	0.951116	YLR135W	0.718128	YBR198C	-0.356903
YDL184C	0.0121035	YER130C	0.949502	YNL134C	0.717848	YBR199W	-0.210021
YDL183C	0.273936	YJL158C	0.948252	YAL053W	0.71637	YBR200W-A	NA
YDL177C	0.167459	YER159C	0.947331	YIL098C	0.715974	YBR200W	-0.0265965
YDL175C	-0.502373	YDR276C	0.945953	YFR027W	0.715212	YBR201C-A	0.119995
YDL174C	-0.0591833	YHR088W	0.94592	YKL089W	0.714367	YBR201W	-0.248898
YDL171C	-1.37509	YFR008W	0.945596	YFR011C	0.71345	YBR202W	-0.123474
YDL169C	1.96449	YBR173C	0.94558	YFL054C	0.712143	YBR203W	0.0921307
YDL167C	-0.760835	YKL061W	0.945316	YLR371W	0.711284	YBR204C	-0.0496825
YDL166C	0.598516	YGL226W	0.942737	YDR146C	0.711133	YBR205W	-0.356823
YDL164C	-0.141057	YGR268C	0.937831	YGR021W	0.709225	YBR206W	-0.327889
YDL160C-A	-0.625171	YLR363W-A	0.937391	YEL005C	0.70755	YBR207W	-0.420586
YDL160C	-0.341629	YER050C	0.937252	YNL053W	0.707481	YBR208C	0.65519
YDL157C	-0.166831	YOL045W	0.932919	YMR163C	0.70627	YBR209W	1.17508
YDL153C	-0.381928	YER046W	0.932441	YLR442C	0.706105	YBR210W	-0.0564045
YDL148C	-0.489469	YMR227C	0.928684	YOR353C	0.705369	YBR211C	-0.516818
YDL145C	-0.495498	YDR486C	0.928244	YLR093C	0.704817	YBR212W	-0.45039
YDL144C	0.079481	YGR076C	0.921514	YFR045W	0.704142	YBR213W	-0.293336
YDL142C	0.0911105	YDR225W	0.921341	YGL227W	0.704077	YBR214W	-0.0247947
YDL140C	-0.884806	YIL152W	0.92057	YOR064C	0.703811	YBR215W	0.0160008
YDL139C	0.503493	YGR127W	0.919728	YKL013C	0.703259	YBR215W	0.971862
YDL135C	0.0420939	YKL013C	0.91816	YNL276C	0.702288	YBR216C	1.13427
YDL134C	-0.0904466	YPR148C	0.9174	YML030W	0.701902	YBR217W	1.71962
YDL133C-A	0.0421049	YKR035W-A	0.915049	YDR462W	0.701284	YBR218C	-0.254439
YDL126C	-0.168343	YDR259C	0.914756	YMR256C	0.701144	YBR219C	NA
YDL125C	0.0603062	YDL020C	0.91389	YDR122W	0.700076	YBR219C	0.0495468
YDL121C	0.439465	YAL008W	0.913664	YPL004C	0.698555	YBR220C	-0.0149975
YDL119C	1.12648	YPR020W	0.910977	YPR158W	0.6985	YBR221C	-0.0809932
YDL115C	0.0374862	YGL087C	0.910756	YML088W	0.698253	YBR221W-A	-1.77068
YDL113C	0.0280222	YBR225W	0.910659	YLR298C	0.69761	YBR222C	-0.0676061
YDL111C	0.075446	YIL098C	0.909559	YGL028C	0.695743	YBR223C	1.41163
YDL110C	1.20491	YDR425W	0.909221	YLR362W	0.695489	YBR223W-A	NA
YDL109C	-0.166735	YDR448W	0.908981	YPL135W	0.695289	YBR224W	-1.20002
YDL106C	0.0868928	YOR215C	0.908388	YBL101C	0.692794	YBR225W	-0.293678
YDL104C	-0.137576	YDR133C	0.908124	YHR137W	0.692182	YBR226C	0.159375
YDL103C	0.325084	YPL154C	0.908083	YHR075C	0.692119	YBR227C	0.0144793
YDL101C	0.201362	YIL146C	0.906925	YDR255C	0.691117	YBR228W	1.63322
YDL100C	0.20316	YDR246W	0.901353	YMR124W	0.689941	YBR229C	-0.157206
YDL098C	0.0333204	YBR053C	0.89984	YOR352W	0.687522	YBR230C	-0.309002
YDL097C	-0.120998	YPR006C	0.896762	YKL087C	0.684335	YBR230C	0.375098
YDL091C	0.195622	YJL003W	0.895497	YDR009W	0.681731	YBR230W-A	-0.786859
YDL090C	0.143044	YGR086C	0.894498	YMR055C	0.681022	YBR231C	-0.356969
YDL088C	-0.269304	YCR075W-A	0.89412	YHR002W	0.68093	YBR232C	2.5251
YDL087C	-0.0863685	YDL181W	0.893439	YAR035W	0.680563	YBR233W-A	-0.351734
YDL085C-A	0.211947	YGL018C	0.892903	YAL034C	0.680563	YBR233W	-0.241855
YDL083C	-0.69629	YPL124W	0.892245	YKL171W	0.680244	YBR234C	-0.365974
YDL081C	-0.780799	YLR173W	0.889754	YGR143W	0.677098	YBR235W	0.0838607
YDL080C	-0.319298	YBR126C	0.887569	YMR227C	0.677044	YBR236C	-0.155984
YDL079C	1.35975	YDL022W	0.886148	YDR133C	0.676367	YBR237W	1.14511
YDL078C	0.145419	YBR238C	0.886021	YJL036W	0.675354	YBR238C	-0.121516
YDL077C	-0.656426	YKR014C	0.885194	YBR050C	0.674585	YBR239C	-0.261285
YDL076C	0.288901	YGR070W	0.884154	YLR454W	0.672051	YBR240C	-0.125087
YDL074C	-0.3904	YPL267W	0.881902	YNR010W	0.671423	YBR241C	0.206529
YDL072C	1.37384	YLL009C	0.881552	YJR083C	0.669317	YBR242W	0.266029
YDL069C	0.00662867	YCR076C	0.879657	YLR395C	0.668632	YBR243C	-0.229912
YDL067C	1.17511	YLR257W	0.879491	YDR162C	0.666944	YBR244W	0.599509
YDL065C	0.444593	YLR006C	0.878033	YKL061W	0.666556	YBR245C	-0.180606
YDL063C	-0.686385	YKL051W	0.878017	YPL087W	0.665968	YBR246W	0.373272
YDL061C	-0.291406	YGR183C	0.874831	YGR282C	0.6657	YBR247C	-0.0902458
YDL059C	-0.10387	YDR287W	0.873629	YJR119C	0.665128	YBR248C	-0.457539
YDL055C	-0.327179	YNL160W	0.873377	YKL218C	0.664842	YBR249C	-0.395432
YDL054C	-0.023799	YDR231C	0.872482	YKL048C	0.664691	YBR250W	2.16395
YDL053C	0.0860911	YHR116W	0.871117	YGL108C	0.664253	YBR251W	-0.442439
YDL052C	-0.167744	YOR152C	0.869265	YJL042W	0.663271	YBR252W	-0.428528
YDL049C	0.780281	YOL107W	0.868903	YJL151C	0.663097	YBR253W	0.571466
YDL048C	0.226334	YHR122W	0.866065	YOL122C	0.661599	YBR254C	-0.313303
YDL045C	0.102275	YBR194W	0.865232	YLR299W	0.661064	YBR255C-A	-0.125159
YDL044C	-0.190821	YKL218C	0.864051	YPR042C	0.660874	YBR255C-A	-0.105456
YDL043C	-0.475781	YDR167W	0.863811	YKL124W	0.660806	YBR255W	0.0116098
YDL042C	-1.07557	YKL150W	0.862826	YBR067C	0.660428	YBR256C	-0.240664
YDL040C	-0.750635	YLR438C-A	0.862349	YIL124W	0.660172	YBR257W	0.378855
YDL036C	-0.812984	YDR529C	0.861837	YDR191W	0.659219	YBR258C	0.497326
YDL035C	-0.0370419	YLR423C	0.861455	YOR226C	0.659122	YBR259W	0.810226
YDL033C	-0.548843	YDR213W	0.857387	YDL025C	0.659035	YBR260C	-0.315577
YDL028C	-0.252579	YOR257W	0.853223	YKL068W-A	0.656751	YBR261C	-0.307049
YDL027C	0.277119	YDR513W	0.850899	YDR185C	0.654888	YBR262C	-0.4486
YDL025C	0.325612	YML130C	0.849334	YER047C	0.654193	YBR263W	-0.393071
YDL024C	2.548	YIR025W	0.848949	YDR178W	0.653907	YBR264C	0.666673
YDL020C	0.164376	YNL027W	0.848558	YDL027C	0.652461	YBR265W	-0.456383
YDL019C	-0.401019	YDR210W	0.847208	YOL108C	0.652103	YBR266C	-0.0482328
YDL018C	0.223039	YKL023W	0.846931	YDL049C	0.650418	YBR267W	-0.215175
YDL015C	-0.194126	YKL138C	0.845892	YHR051W	0.648618	YBR268W	-0.346272
YDL012C	0.438032	YKL074C	0.843542	YMR238W	0.644566	YBR269C	-0.359733
YDL005C	0.0958403	YKL085W	0.840906	YNL065W	0.64451	YBR270C	2.30834
YDL002C	-0.278818	YGR207C	0.840592	YKL208W	0.64405	YBR271W	-0.0145307
YDR001C	1.28366	YOR352W	0.839133	YAR027W	0.643729	YBR272C	0.186841
YDR005C	-0.334115	YBR138C	0.835196	YPL092W	0.643645	YBR273C	-0.241361
YDR006C	-0.348248	YLR079W	0.835051	YJL005W	0.643551	YBR274W	0.312747
YDR016C	-0.0919008	YHR038W	0.83384	YKL141W	0.64284	YBR275C	-0.332056
YDR017C	-0.586199	YGR129W	0.83235	YNR022C	0.641876	YBR276C	0.0653618
YDR019C	1.5877	YGL006W	0.830763	YNL279W	0.641634	YBR277C	1.04841
YDR020C	-0.632065	YGL098W	0.830506	YGL036W	0.641308	YBR278W	0.951115
YDR022C	0.10291	YJR074W	0.82943	YDL106C	0.641107	YBR279W	-0.345542
YDR026C	-0.26382	YPL219W	0.828681	YIL156W	0.640731	YBR280C	0.270418
YDR027C	-0.509866	YDL216C	0.824309	YDL244W	0.64069	YBR281C	-0.125638
YDR028C	-0.477581	YML129C	0.824026	YPL163C	0.640625	YBR282W	-0.366
YDR030C	0.466	YHR162W	0.823956	YBR225W	0.640619	YBR283C	-0.300823
YDR032C	0.321492	YJL137C	0.823455	YBR037C	0.640192	YBR284W	2.52331
YDR034C	-0.25406	YGL250W	0.823004	YPR134W	0.637359	YBR285W	-0.426763
YDR036C	-0.0780702	YER162C	0.822308	YLL023C	0.63619	YBR286W	-0.448644
YDR038C	0.25358	YOR028C	0.818121	YHR116W	0.63298	YBR287W	-0.0718797
YDR045C	-0.101716	YOR292C	0.816602	YOR113W	0.632494	YBR288C	-0.406799
YDR046C	-0.781665	YGL056C	0.810096	YPL109C	0.632357	YBR289W	-0.257793
YDR050C	-0.200121	YLR304C	0.808381	YNL208W	0.632037	YBR290W	-0.422975
YDR051C	0.0179772	YAL063C	0.808306	YLR238W	0.632029	YBR291C	0.830292
YDR052C	-0.535669	YIL062C	0.808018	YER050C	0.630685	YBR292C	0.505112
YDR054C	0.119593	YGR239C	0.80472	YMR268C	0.629666	YBR293W	2.00105
YDR056C	0.58597	YBR282W	0.804602	YDR494W	0.627468	YBR294W	-1.24209
YDR058C	0.965633	YGR130C	0.80357	YOR136W	0.627442	YBR295W	1.07116
YDR059C	1.09967	YAR050W	0.802607	YJL149W	0.627267	YBR296C-A	-0.553393
YDR066C	-0.121484	YDR079W	0.80116	YML111W	0.624807	YBR296C	-1.10598
YDR067C	0.357274	YMR110C	0.80069	YPL107W	0.623656	YBR297W	0.351028
YDR069C	-0.457528	YLR323C	0.799123	YEL024W	0.622321	YBR298C-A	2.01978
YDR071C	0.191197	YMR022W	0.799037	YJL152W	0.621188	YBR298C	3.31113
YDR072C	-0.257778	YMR068W	0.798421	YPL215W	0.620442	YBR299W	1.79776
YDR078C	-0.0142477	YBL090W	0.797648	YML050W	0.620113	YBR300C	1.04927
YDR079C-A	0.12386	YLR019W	0.794196	YNL092W	0.619916	YBR301W	1.04274
YDR081C	-0.480219	YPL004C	0.793853	YFL049W	0.619743	YBR302C	0.320987
YDR084C	0.352026	YGL029W	0.792659	YCR042C	0.619658	YCL001W-A	1.52432
YDR085C	0.923867	YML088W	0.791777	YPL138C	0.618505	YCL001W-B	0.684589
YDR086C	0.0214645	YAL055W	0.790012	YML107C	0.617064	YCL001W	-0.486547
YDR087C	0.0375791	YPL209C	0.789222	YMR158W	0.616888	YCL002C	-0.285361
YDR088C	-0.127686	YIL111W	0.789166	YJR089W	0.616535	YCL002C	1.34488
YDR090C	0.0187698	YKL039W	0.788989	YMR144W	0.616452	YCL004W	1.7799
YDR091C	-0.261026	YER182W	0.785206	YHR195W	0.615816	YCL005W-A	-0.490593
YDR097C	-0.853646	YBL091C-A	0.7852	YCL012C	0.615558	YCL005W-A	-0.569685
YDR098C	-0.0733059	YDR255C	0.784501	YPR055W	0.615512	YCL005W	-0.0560629
YDR101C	0.133562	YLR332W	0.784415	YDR295C	0.615354	YCL007C	1.8702
YDR104C	-0.344063	YEL005C	0.782824	YDR479C	0.615226	YCL008C	0.203364
YDR105C	-0.112508	YDR202C	0.782076	YKR016W	0.614221	YCL009C	-0.345518
YDR107C	0.919939	YKL047W	0.78201	YLR425W	0.612682	YCL010C	2.13617
YDR109C	0.0653437	YPL222W	0.781488	YGR207C	0.611684	YCL011C	0.855681
YDR111C	-0.635503	YEL059C-A	0.781376	YLR145W	0.605561	YCL012C	-0.265194
YDR113C	-0.510842	YIL007C	0.77715	YPL118W	0.60491	YCL012C	0.623929
YDR116C	0.237266	YDR511W	0.775671	YGR250C	0.604043	YCL014W	-0.0786235
YDR117C	-0.419589	YHR191C	0.775476	YGR239C	0.6039	YCL016C	1.11326
YDR120C	-0.063133	YPL041C	0.775186	YLR283W	0.603687	YCL017C	-0.416773
YDR123C	-0.311785	YCR091W	0.774933	YOR073W	0.603417	YCL018W	1.67219
YDR125C	0.143479	YDL183C	0.773419	YOL055C	0.603297	YCL019W	0.618788
YDR129C	0.388163	YHR171W	0.773391	YDR535C	0.601453	YCL021W-A	-0.186771
YDR130C	-0.472868	YGL058W	0.772852	YLR049C	0.601441	YCL022C	-0.000924167
YDR131C	0.0269847	YDR162C	0.772717	YJR034W	0.601266	YCL023C	2.70418
YDR132C	-1.13514	YJR109C	0.772284	YLR201C	0.600783	YCL024W	-0.216515
YDR133C	0.719954	YIL156W-B	0.771522	YKR035W-A	0.600549	YCL025C	-0.298245
YDR135C	-0.718036	YPR010C-A	0.769097	YML053C	0.600515	YCL026C-A	-0.28588
YDR139C	0.175944	YAL028W	0.767205	YBR160W	0.599802	YCL026C-B	-0.6369
YDR141C	-0.564389	YAL039C	0.766953	YOL031C	0.59967	YCL027W	-0.183859
YDR142C	-0.0886093	YGR048W	0.76682	YHR167W	0.599252	YCL028W	-0.369512
YDR143C	-0.475745	YLR058C	0.766481	YCR005C	0.598603	YCL029C	-0.0089927
YDR144C	-0.321016	YGR209C	0.766344	YMR028W	0.598407	YCL030C	-0.452547
YDR146C	-0.474393	YFR004W	0.765705	YBR289W	0.598332	YCL031C	-0.425313
YDR148C	0.128465	YGR205W	0.764628	YKL023W	0.597606	YCL032W	-0.00702161
YDR151C	-0.131763	YLR376C	0.763404	YLR257W	0.597216	YCL033C	-0.357258
YDR153C	-0.364392	YLR345W	0.762664	YDR436W	0.596122	YCL034W	-0.269341
YDR162C	0.255612	YPL014W	0.761698	YBR024W	0.595771	YCL035C	-0.279024
YDR164C	-0.47074	YLR119W	0.761467	YBR057C	0.595735	YCL036W	0.111315
YDR166C	-0.297558	YDR383C	0.761213	YPR148C	0.59469	YCL037C	-0.103731
YDR169C	-0.0842255	YKL007W	0.760379	YHR171W	0.594311	YCL038C	-0.0869418
YDR170C	-1.11038	YDR272W	0.759841	YDL149W	0.594226	YCL039W	0.956685
YDR173C	-0.593215	YOR035C	0.758676	YDR473C	0.594043	YCL040W	-0.335947
YDR175C	0.018159	YER062C	0.757621	YMR139W	0.592617	YCL041C	0.0508665
YDR179C	1.119	YGL041W-A	0.757061	YGR046W	0.591906	YCL042W	0.591317
YDR181C	0.0355477	YGR287C	0.755762	YER167W	0.591309	YCL043C	-0.243663
YDR186C	-0.0440828	YHR059W	0.755485	YML041C	0.591152	YCL044C	0.129183
YDR190C	0.0899724	YGL141W	0.753972	YMR192W	0.590871	YCL045C	-0.25197
YDR192C	-0.0504911	YOR104W	0.753895	YDR219C	0.590858	YCL046W	-0.194504
YDR194C	-0.169192	YPL229W	0.75232	YMR225C	0.59054	YCL047C	-0.230603
YDR196C	0.251187	YHR008C	0.749112	YPL170W	0.590326	YCL048W-A	-1.18243
YDR198C	-0.266653	YHR156C	0.748228	YMR068W	0.590232	YCL048W	1.19413
YDR200C	0.1705	YHR081W	0.748024	YJL146W	0.586565	YCL049C	-0.164594
YDR202C	0.539571	YJL179W	0.747207	YHR142W	0.586518	YCL050C	-0.113895
YDR207C	-0.416666	YBR244W	0.746687	YKL007W	0.586285	YCL051W	-0.276736
YDR217C	-0.372993	YHL027W	0.746223	YKL137W	0.586095	YCL052C	-0.122054
YDR219C	-0.255439	YGR250C	0.745086	YER064C	0.585426	YCL054W-A	0.875302
YDR224C	0.726802	YMR028W	0.744101	YGR183C	0.585221	YCL054W	-0.2207
YDR228C	-0.103622	YDR532C	0.74348	YGL133W	0.583675	YCL055W	-0.577752
YDR231C	0.960446	YML062C	0.743285	YPL271W	0.582988	YCL056C	1.7566
YDR233C	-0.283735	YBR273C	0.743016	YLR019W	0.582843	YCL057C-A	-0.468953
YDR236C	0.0730406	YDR315C	0.742006	YOR179C	0.582357	YCL057W	-0.260947
YDR238C	-0.324596	YLR201C	0.741003	YKR014C	0.581885	YCL058C	-0.182932
YDR239C	-0.206493	YLR038C	0.739858	YHR080C	0.581884	YCL058W-A	-0.346475
YDR240C	-0.254413	YKL208W	0.737902	YDR451C	0.581651	YCL059C	-0.210861
YDR243C	-0.255648	YDL115C	0.737615	YPL248C	0.581565	YCL061C	0.418516
YDR248C	0.158987	YCR020C-A	0.737541	YCR036W	0.581147	YCL063W	-0.328476
YDR249C	0.363027	YOR114W	0.735991	YGR080W	0.579969	YCL064C	0.247138
YDR255C	0.453988	YDL045C	0.73425	YJL185C	0.579904	YCL065W	NA
YDR257C	-0.0659107	YKL103C	0.734112	YER026C	0.578974	YCL066W	1.10832
YDR258C	0.26313	YGL157W	0.733415	YBL080C	0.577663	YCL067C	1.40407
YDR259C	1.09779	YDL017W	0.733143	YFL008W	0.576639	YCL068C	NA
YDR260C	0.302558	YDR067C	0.732882	YDL028C	0.576306	YCL069W	-1.42088
YDR261C	0.0388157	YOR136W	0.732668	YOR376W-A	0.576093	YCL073C	0.6039
YDR263C	-0.405139	YDL106C	0.73159	YDL211C	0.575449	YCL074W	Inf
YDR264C	-0.410092	YOL044W	0.730613	YDL142C	0.575277	YCL075W	1.78572
YDR266C	-0.395496	YHR143W-A	0.730183	YOL017W	0.574764	YCL076W	-0.512025
YDR267C	-0.184435	YGR102C	0.728987	YDR200C	0.57431	YCR001W	0.353652
YDR276C	0.424597	YDL147W	0.728632	YGR163W	0.573728	YCR002C	-0.490924
YDR277C	0.0330204	YLR093C	0.728513	YMR003W	0.57171	YCR003W	-0.560094
YDR281C	-2.53117	YNL142W	0.728077	YHR161C	0.571129	YCR004C	-0.379219
YDR282C	-0.070682	YDL092W	0.727864	YDR032C	0.571107	YCR005C	-0.192757
YDR283C	-0.372236	YKL016C	0.726838	YKL045W	0.571089	YCR006C	1.42304
YDR284C	0.186782	YKL137W	0.726519	YJL150W	0.569507	YCR007C	1.02056
YDR286C	0.59072	YDR462W	0.725226	YNL103W	0.568968	YCR008W	-0.32331
YDR289C	-0.212879	YMR036C	0.725191	YDR379W	0.568623	YCR009C	-0.220611
YDR292C	-0.748575	YCR009C	0.724967	YAR019C	0.566724	YCR010C	0.361967
YDR293C	-0.269667	YMR062C	0.724368	YNL325C	0.566027	YCR011C	-0.0647005
YDR294C	0.366061	YDR308C	0.723559	YDL056W	0.566018	YCR012W	-0.450139
YDR295C	-0.234465	YJL026W	0.723049	YGR092W	0.565231	YCR013C	-0.60122
YDR298C	0.325909	YLR254C	0.720044	YDL057W	0.564963	YCR014C	1.32788
YDR300C	-0.00591061	YDL012C	0.718706	YGR076C	0.564955	YCR015C	0.772469
YDR303C	-0.543123	YHR167W	0.718061	YIL105C	0.563965	YCR016W	-0.269337
YDR304C	0.105853	YCR102C	0.71782	YGR019W	0.561941	YCR017C	0.159543
YDR305C	0.37844	YDR289C	0.717741	YPR155C	0.561569	YCR018C-A	0.559308
YDR306C	-0.0122199	YOL157C	0.717688	YBR179C	0.561447	YCR018C	0.506874
YDR308C	0.690081	YIL033C	0.717406	YOR153W	0.561143	YCR019W	0.311733
YDR309C	-0.536839	YOR327C	0.715664	YMR199W	0.561125	YCR020C-A	1.05038
YDR310C	-1.12843	YHR075C	0.713549	YNL224C	0.560848	YCR020C	3.6718
YDR313C	0.162839	YDL070W	0.713081	YHR059W	0.559776	YCR020W-B	2.15746
YDR314C	-0.034455	YLR290C	0.712201	YER137C	0.559772	YCR021C	-0.519476
YDR315C	1.11473	YNL074C	0.71198	YKL049C	0.55885	YCR022C	1.61348
YDR319C	-0.0140877	YDR309C	0.710534	YBR165W	0.558371	YCR023C	0.404945
YDR320C	-0.185882	YOL129W	0.709161	YER182W	0.556451	YCR024C-A	-0.16558
YDR320C-A	0.385892	YGR030C	0.708856	YBL041W	0.556384	YCR024C-B	-0.0955822
YDR322C-A	0.396709	YFR041C	0.70881	YPR104C	0.55605	YCR024C	-0.136928
YDR323C	-0.037924	YMR297W	0.707238	YOL045W	0.555817	YCR025C	1.09669
YDR324C	-0.380347	YKR039W	0.707145	YJL157C	0.555122	YCR026C	-0.0414573
YDR326C	-0.2922	YJR088C	0.707104	YIL162W	0.554985	YCR027C	0.150241
YDR328C	0.309491	YKL148C	0.705502	YLR370C	0.554699	YCR028C-A	-0.515037
YDR329C	0.182702	YFR001W	0.705447	YHR086W	0.553163	YCR028C-A	0.366004
YDR333C	-0.227715	YBR062C	0.704181	YMR198W	0.550901	YCR028C	1.222
YDR338C	-0.278962	YMR112C	0.703815	YHR198C	0.550417	YCR030C	-0.33271
YDR339C	0.251134	YBL028C	0.700887	YOR269W	0.548562	YCR031C	-0.351847
YDR341C	-0.468522	YKL125W	0.7003	YLR223C	0.548019	YCR031C	0.572824
YDR342C	2.18237	YFL024C	0.698747	YER088C	0.547911	YCR032W	0.550852
YDR343C	2.18112	YDR100W	0.697944	YGR166W	0.547875	YCR033W	-0.174357
YDR345C	-0.0583225	YMR219W	0.697438	YGR063C	0.547473	YCR034W	-0.308493
YDR346C	-0.119772	YML117W	0.6962	YIR016W	0.547195	YCR035C	-0.207591
YDR348C	-0.2715	YGR174C	0.695639	YBL084C	0.546881	YCR036W	0.673967
YDR349C	0.12112	YJL107C	0.695193	YJL180C	0.546197	YCR037C	1.73627
YDR350C	0.444213	YIL154C	0.69465	YPR186C	0.545336	YCR038C	0.736286
YDR357C	-0.715389	YLR417W	0.694093	YCL055W	0.544547	YCR038W-A	0.102523
YDR359C	-0.598621	YNL134C	0.693662	YKL129C	0.542087	YCR039C	1.40407
YDR361C	-0.276629	YOL009C	0.693656	YPL144W	0.541157	YCR040W	1.10832
YDR362C	-0.493319	YDR032C	0.693147	YGR179C	0.541097	YCR041W	0.127563
YDR364C	-0.334773	YLR392C	0.692684	YKL148C	0.540209	YCR042C	-0.142828
YDR365C	-0.00402227	YLR219W	0.692463	YPL176C	0.54016	YCR043C	-0.127632
YDR369C	-0.28334	YLR407W	0.691754	YOL053W	0.539209	YCR044C	-0.187424
YDR370C	-0.41218	YJR135W-A	0.691371	YGL141W	0.539188	YCR045C	0.836819
YDR372C	0.242041	YBR204C	0.690773	YBL038W	0.538722	YCR045W-A	2.80916
YDR375C	-0.212442	YIL140W	0.690193	YMR110C	0.537113	YCR046C	-0.407163
YDR378C	0.125417	YER095W	0.689498	YIL062C	0.535962	YCR047C	-0.260704
YDR379C-A	0.611431	YNL159C	0.687762	YBR095C	0.535571	YCR047W-A	0.94659
YDR381C-A	0.736379	YCL032W	0.687097	YNL081C	0.535513	YCR048W	-0.229079
YDR383C	0.44265	YHR179W	0.686962	YOR245C	0.535138	YCR049C	1.9551
YDR384C	-0.0961576	YOL032W	0.686512	YLR310C	0.534761	YCR050C	0.904461
YDR387C	-0.0794849	YBR026C	0.686297	YOR215C	0.534494	YCR051W	-0.220966
YDR390C	-0.20861	YPL053C	0.685509	YIL004C	0.534376	YCR052W	-0.275775
YDR391C	1.74474	YKL099C	0.684241	YDR118W	0.533921	YCR053W	-0.406465
YDR397C	0.411019	YBR287W	0.682708	YDR425W	0.533916	YCR054C	-0.202042
YDR404C	0.333028	YPR026W	0.681996	YMR193W	0.533352	YCR057C	-0.263231
YDR407C	-0.721921	YLR199C	0.677274	YGR109C	0.533083	YCR059C	0.260633
YDR408C	-0.0518823	YPL067C	0.677241	YOR324C	0.532839	YCR060W	-0.11928
YDR410C	-0.165633	YDR068W	0.676918	YIL042C	0.532824	YCR061W	-0.199912
YDR411C	0.175615	YMR262W	0.676819	YGR044C	0.532329	YCR063W	1.26535
YDR414C	-0.759302	YGR092W	0.676541	YMR216C	0.531486	YCR064C	-0.192486
YDR415C	0.203236	YNL293W	0.675924	YPL011C	0.531218	YCR065W	0.488314
YDR422C	-0.360623	YKL117W	0.674729	YDR096W	0.529822	YCR066W	0.33535
YDR423C	0.0925797	YGL117W	0.673248	YKL195W	0.529653	YCR067C	-0.214021
YDR424C	0.0900463	YPL113C	0.673066	YOR065W	0.529649	YCR068W	1.12287
YDR428C	-1.21247	YJL035C	0.673049	YGL056C	0.529375	YCR069W	0.121649
YDR429C	0.133558	YDR249C	0.672155	YNL253W	0.529364	YCR071C	-0.456914
YDR430C	-0.713764	YER020W	0.67193	YNL115C	0.528368	YCR072C	-0.237733
YDR435C	0.776065	YJR067C	0.671621	YPL116W	0.528243	YCR073C	0.518241
YDR441C	-0.177481	YMR200W	0.671192	YLR117C	0.52735	YCR073W-A	-0.211447
YDR443C	-0.418605	YKL109W	0.670195	YPR016C	0.52732	YCR075C	-0.0283686
YDR445C	-0.300702	YOR245C	0.669449	YPR079W	0.525942	YCR075W-A	-0.220978
YDR447C	-0.0757385	YPL138C	0.669196	YIL007C	0.525497	YCR076C	0.60165
YDR449C	-0.316896	YPR094W	0.669065	YPR149W	0.525397	YCR077C	-0.389281
YDR451C	-0.235484	YNR049C	0.667074	YDL067C	0.524666	YCR079W	-0.122562
YDR453C	1.80843	YPL087W	0.667021	YGL021W	0.524574	YCR081C-A	-0.0621968
YDR454C	-1.02321	YJL146W	0.666923	YGL237C	0.524088	YCR081W	0.298187
YDR458C	-0.161462	YJR034W	0.66602	YLR128W	0.523862	YCR082W	0.0358039
YDR459C	-0.275381	YOR386W	0.665082	YKR093W	0.523782	YCR083W	-0.371035
YDR461C-A	0.579	YBR162W-A	0.664838	YDR088C	0.523221	YCR084C	-0.394256
YDR465C	-0.228329	YGR067C	0.659701	YGR223C	0.52227	YCR085W	1.11263
YDR468C	0.230149	YJL099W	0.658471	YDR296W	0.521463	YCR086W	-0.108465
YDR470C	0.0551095	YLR260W	0.658372	YMR076C	0.521333	YCR087C-A	0.114046
YDR473C	0.145967	YKL121W	0.658333	YKL035W	0.519918	YCR087W	-0.18897
YDR475C	0.104813	YPL107W	0.658165	YBR185C	0.519201	YCR088W	0.0472378
YDR476C	0.0595141	YKL126W	0.657666	YIL095W	0.518899	YCR089W	2.34481
YDR479C	0.197002	YJR083C	0.656674	YMR111C	0.517586	YCR090C	-0.324272
YDR481C	-0.29569	YBR120C	0.655714	YDL238C	0.516945	YCR091W	1.51229
YDR482C	0.557544	YKL048C	0.654568	YGR271W	0.516583	YCR092C	0.531104
YDR485C	0.10137	YOL149W	0.653602	YLR250W	0.516516	YCR093W	-0.265733
YDR486C	0.870339	YDR204W	0.652743	YIL034C	0.515165	YCR094W	-0.210257
YDR487C	0.315735	YBR004C	0.652244	YCR032W	0.514257	YCR095C	-0.361065
YDR488C	-0.342177	YBR008C	0.651131	YDL020C	0.51356	YCR095W-A	3.17963
YDR490C	0.196149	YER184C	0.650067	YHR038W	0.513205	YCR096C	1.69826
YDR495C	-0.239482	YBR052C	0.647806	YDL117W	0.512898	YCR097W-A	NA
YDR496C	-0.254435	YNR022C	0.646191	YDR089W	0.512428	YCR097W	-0.371139
YDR497C	2.04971	YMR031C	0.645559	YHR118C	0.51207	YCR097W	-0.357443
YDR498C	-0.394569	YMR263W	0.643782	YDL091C	0.511714	YCR098C	0.101268
YDR500C	-0.477185	YLR200W	0.643477	YJL147C	0.51024	YCR099C	1.33996
YDR502C	0.950713	YCR036W	0.643155	YLR455W	0.510188	YCR100C	1.33609
YDR503C	0.302076	YJL030W	0.642951	YER046W	0.510071	YCR101C	1.13596
YDR505C	-0.145829	YER047C	0.640869	YGR237C	0.509045	YCR102C	1.93342
YDR506C	0.232288	YJR061W	0.640788	YLR396C	0.508478	YCR102W-A	2.76809
YDR507C	-0.234928	YNR061C	0.640603	YDR512C	0.507952	YCR104W	2.73642
YDR508C	-0.0160104	YGL061C	0.640204	YBR273C	0.507827	YCR105W	-0.101486
YDR512C	0.289847	YGL208W	0.639379	YPL213W	0.507385	YCR106W	1.8113
YDR514C	-0.251926	YLR009W	0.639108	YPL183W-A	0.507303	YCR107W	1.71007
YDR516C	0.542522	YNL097C	0.637228	YNL027W	0.506258	YCR108C	1.27922
YDR520C	-0.320022	YIR014W	0.636396	YER095W	0.506206	YDL001W	0.0877629
YDR524C	-0.322404	YMR306W	0.635849	YLR337C	0.505393	YDL002C	0.125536
YDR524C-B	-0.431811	YMR178W	0.635764	YGL041W-A	0.50535	YDL003W	-0.395731
YDR529C	0.900911	YKR007W	0.63512	YNL157W	0.50516	YDL004W	-0.346857
YDR530C	0.344489	YMR124W	0.635111	YGR278W	0.503766	YDL005C	-0.184426
YDR532C	0.295965	YKR074W	0.634857	YNL039W	0.503754	YDL006W	-0.299769
YDR533C	1.64084	YIL122W	0.634749	YMR244C-A	0.501379	YDL007C-A	-0.817269
YDR534C	0.311564	YHR112C	0.63466	YMR137C	0.500314	YDL007W	-0.309524
YDR540C	0.667317	YHR195W	0.634127	YGL184C	0.498567	YDL008W	-0.462732
YDR541C	-0.724731	YDL149W	0.634093	YOR035C	0.498488	YDL009C	1.11184
YDL248W	0.500103	YGR194C	0.633074	YMR022W	0.498266	YDL010W	0.532845
YDL244W	1.98298	YGR180C	0.632373	YIL157C	0.49796	YDL011C	1.38158
YDL241W	2.32598	YMR140W	0.631809	YDL003W	0.497632	YDL012C	-0.242419
YDL240W	-0.747485	YBL059C-A	0.631805	YBR005W	0.497602	YDL012C	1.54975
YDL237W	0.115874	YDR129C	0.631334	YPL052W	0.496891	YDL013W	-0.148002
YDL236W	0.356167	YPR016C	0.630821	YLR350W	0.496736	YDL014W	-0.424504
YDL233W	1.05971	YGL044C	0.630081	YBR212W	0.496199	YDL015C	-0.112294
YDL232W	-0.115146	YPR134W	0.629842	YGR089W	0.495598	YDL016C	-0.0112893
YDL230W	0.643797	YDL173W	0.627071	YLR312W-A	0.495463	YDL017W	-0.229646
YDL229W	-0.806831	YDR107C	0.626761	YDL048C	0.494529	YDL018C	-0.0923992
YDL225W	0.263934	YMR039C	0.625211	YKL193C	0.493769	YDL019C	-0.137821
YDL219W	-0.00466779	YDR381C-A	0.625026	YLR390W	0.49372	YDL020C	-0.178837
YDL212W	0.393331	YPL100W	0.624943	YOL018C	0.493036	YDL021W	-0.347174
YDL210W	3.57267	YKL143W	0.624814	YLL007C	0.4929	YDL022C-A	2.20681
YDL208W	0.582063	YAR015W	0.624143	YGL093W	0.492466	YDL022W	-0.209211
YDL207W	-0.186394	YIL116W	0.623896	YER059W	0.492278	YDL023C	1.55625
YDL206W	0.0494837	YIL027C	0.623412	YKL003C	0.492228	YDL024C	1.20513
YDL204W	3.36278	YBR212W	0.623118	YDR251W	0.491463	YDL025C	0.0345183
YDL202W	0.208803	YBR297W	0.622048	YNR023W	0.491214	YDL025W-A	0.173267
YDL201W	-0.17408	YJR104C	0.621896	YPL100W	0.490913	YDL026W	1.57409
YDL195W	-0.677952	YLR456W	0.621089	YBR098W	0.490775	YDL027C	0.0268272
YDL194W	0.0327121	YFR049W	0.620476	YPR010C-A	0.490597	YDL028C	-0.225675
YDL193W	0.144206	YMR255W	0.620276	YLR286C	0.490194	YDL029W	-0.236641
YDL192W	-0.168309	YCL058W-A	0.619115	YDR318W	0.490012	YDL029W	-0.0736513
YDL191W	-0.330693	YDL053C	0.618657	YDR298C	0.489366	YDL030W	-0.020381
YDL189W	-0.356675	YBL059W	0.61787	YNL242W	0.489333	YDL031W	-0.255637
YDL185W	-0.606234	YGL080W	0.617523	YKR095W	0.488747	YDL032W	1.58137
YDL182W	0.13588	YHR192W	0.617184	YNR009W	0.488676	YDL033C	0.842261
YDL181W	0.223634	YJL200C	0.616748	YKR097W	0.488311	YDL034W	1.36288
YDL180W	-0.707723	YGL130W	0.616544	YNL177C	0.488299	YDL035C	-0.418045
YDL179W	-0.430465	YER030W	0.616433	YHL027W	0.48829	YDL036C	0.139773
YDL178W	-0.111262	YBR254C	0.614811	YBL061C	0.487664	YDL037C	-0.105343
YDL176W	-0.225868	YGL174W	0.613152	YKL053C-A	0.487156	YDL039C	-0.0914394
YDL173W	0.804515	YHR051W	0.612689	YBR026C	0.486827	YDL040C	-0.345307
YDL170W	0.337229	YGL055W	0.612575	YLR289W	0.4863	YDL041W	0.791532
YDL168W	0.0900549	YDL025C	0.611766	YLR119W	0.48614	YDL042C	-0.388475
YDL165W	0.502587	YGR141W	0.610312	YJR039W	0.48602	YDL043C	-0.0715031
YDL161W	0.438816	YPR065W	0.609691	YLR304C	0.485489	YDL044C	0.434593
YDL159W	0.224148	YGL185C	0.609166	YER081W	0.485351	YDL045C	-0.301743
YDL156W	-0.469412	YFR052W	0.60904	YMR030W	0.485342	YDL045W-A	-0.481535
YDL155W	-0.456626	YDR322C-A	0.606434	YKL189W	0.48476	YDL046W	-0.435974
YDL150W	-0.121997	YPR188C	0.605405	YEL062W	0.484662	YDL047W	0.0928735
YDL149W	0.0789023	YCR002C	0.605288	YHR147C	0.484166	YDL048C	-0.103012
YDL147W	0.281465	YJL048C	0.60232	YDR262W	0.483711	YDL049C	-0.06104
YDL146W	-0.311715	YOR279C	0.601882	YMR008C	0.483579	YDL050C	-1.54064
YDL143W	-0.103365	YLR177W	0.601465	YCR066W	0.481484	YDL051W	-0.122542
YDL141W	-0.358836	YDR405W	0.601446	YHR061C	0.481423	YDL052C	-0.328144
YDL138W	-0.253554	YBR058C-A	0.601368	YJR110W	0.481213	YDL053C	-0.0898327
YDL137W	0.182528	YBR109C	0.59963	YML131W	0.479984	YDL054C	-0.0348319
YDL136W	-0.299947	YMR188C	0.599331	YMR236W	0.479476	YDL055C	-0.419916
YDL133W	0.156253	YOR125C	0.598959	YLR069C	0.479007	YDL056W	-0.161811
YDL132W	-0.341107	YKR058W	0.598123	YGL180W	0.478876	YDL057W	0.15974
YDL131W	0.128783	YKL063C	0.597505	YJL068C	0.478744	YDL058W	-0.366351
YDL130W-A	2.03051	YOL082W	0.597087	YGL045W	0.478423	YDL059C	-0.167743
YDL130W	-0.512005	YAL044C	0.5966	YGL208W	0.475749	YDL060W	-0.109619
YDL129W	-0.010347	YDR115W	0.596429	YOL096C	0.474973	YDL061C	-0.406961
YDL128W	0.00631967	YJR010C-A	0.596288	YGL131C	0.474697	YDL061C	1.35836
YDL127W	-0.73202	YML081C-A	0.596171	YLR387C	0.474602	YDL062W	2.23422
YDL124W	0.760069	YGR080W	0.596005	YCR083W	0.474301	YDL063C	-0.293914
YDL123W	0.340909	YBL001C	0.595075	YDR069C	0.472719	YDL064W	-0.314667
YDL122W	-0.504961	YAR031W	0.593998	YNL020C	0.472487	YDL064W	0.290849
YDL120W	0.111656	YGL059W	0.593917	YFR031C	0.472435	YDL065C	-0.182262
YDL117W	-0.330309	YBR222C	0.592548	YJR033C	0.471612	YDL066W	-0.352537
YDL116W	-0.398731	YKL188C	0.59249	YKR013W	0.471326	YDL067C	-0.235215
YDL112W	-0.970294	YLR221C	0.592278	YNL252C	0.471024	YDL068W	-0.168015
YDL108W	-0.190863	YOR137C	0.590392	YBR083W	0.470882	YDL069C	0.376096
YDL107W	0.121725	YNL002C	0.590207	YLR144C	0.470333	YDL070W	-0.398286
YDL105W	-0.0359484	YLR128W	0.589977	YKL101W	0.470014	YDL071C	0.904987
YDL102W	-0.288623	YLL027W	0.589498	YJL131C	0.469718	YDL072C	-0.214696
YDL099W	0.212786	YBR096W	0.588589	YOL090W	0.469141	YDL073W	0.316451
YDL095W	-0.368442	YPL046C	0.587701	YCL032W	0.467964	YDL074C	-0.234907
YDL093W	-0.147294	YPR172W	0.586202	YMR311C	0.46789	YDL075W	-0.437462
YDL092W	0.821674	YPL060W	0.586103	YLR453C	0.467524	YDL075W	0.0115271
YDL089W	0.0128042	YKL053C-A	0.583776	YOL081W	0.466277	YDL076C	0.21862
YDL086W	0.850043	YNL215W	0.583756	YPL221W	0.466177	YDL077C	0.500653
YDL085W	2.84891	YDL161W	0.581029	YNL180C	0.466174	YDL078C	-0.377995
YDL084W	-0.488858	YNL113W	0.580484	YDR038C	0.465365	YDL079C	0.0600802
YDL082W	-0.588306	YLR324W	0.580347	YGL226W	0.465065	YDL079C	-0.225288
YDL075W	-0.631814	YPL196W	0.579628	YDR202C	0.464742	YDL080C	0.603548
YDL073W	-0.460751	YFR011C	0.579402	YMR152W	0.463893	YDL081C	-0.565641
YDL070W	0.29841	YBR211C	0.579259	YIL093C	0.462673	YDL082W	-0.548306
YDL066W	-0.303606	YNL020C	0.579031	YBR140C	0.462027	YDL082W	0.354089
YDL064W	0.144588	YER042W	0.578895	YNL052W	0.461875	YDL083C	-0.472112
YDL060W	-0.47124	YOR145C	0.578833	YOR089C	0.459737	YDL083C	0.464612
YDL058W	-0.844625	YML120C	0.577966	YDL005C	0.459027	YDL084W	-0.460262
YDL057W	0.732663	YLR049C	0.577608	YDR197W	0.458361	YDL085C-A	-0.043935
YDL056W	-0.505646	YJL185C	0.57744	YOL157C	0.45818	YDL085W	0.022002
YDL051W	-0.0145722	YKR023W	0.577119	YMR295C	0.458143	YDL086C-A	0.254051
YDL046W	0.443611	YBR199W	0.577102	YCL051W	0.45679	YDL086W	-0.13709
YDL045W-A	0.558226	YJR078W	0.5769	YKR101W	0.454107	YDL087C	0.962729
YDL031W	-0.3493	YNR034W	0.576681	YDR175C	0.454065	YDL088C	0.363071
YDL030W	-0.511105	YHR137W	0.576011	YMR073C	0.453498	YDL089W	-0.160224
YDL029W	0.375838	YHL013C	0.574989	YKL179C	0.452581	YDL090C	0.0986968
YDL022W	0.607661	YPL127C	0.574045	YGL007C-A	0.451387	YDL091C	-0.0335626
YDL021W	1.43615	YIL144W	0.573215	YGL242C	0.451199	YDL092W	-0.522151
YDL017W	0.218477	YER048W-A	0.572082	YNR036C	0.451129	YDL093W	0.420974
YDL014W	-0.0182901	YKL141W	0.572075	YAL044C	0.450479	YDL094C	2.97606
YDL013W	-0.298773	YJR125C	0.571787	YDR151C	0.450191	YDL095W	-0.502116
YDL010W	0.0823829	YCR003W	0.571706	YMR293C	0.450144	YDL096C	2.09376
YDL008W	-0.00517744	YPL096W	0.570965	YOR285W	0.450032	YDL097C	-0.306893
YDL007W	-0.134721	YNL116W	0.570778	YBR251W	0.449774	YDL098C	0.00124121
YDL006W	-0.296963	YGL077C	0.57067	YLR086W	0.44901	YDL099W	0.1918
YDL004W	0.343646	YML131W	0.570222	YPL174C	0.448237	YDL100C	-0.433253
YDL003W	-0.517732	YNL031C	0.569993	YEL061C	0.447911	YDL101C	0.136966
YDL001W	-0.28107	YGL047W	0.568939	YKL092C	0.44744	YDL102W	-0.303693
YDR002W	0.217722	YPR093C	0.568784	YPL253C	0.447396	YDL103C	-0.398282
YDR004W	-0.318416	YMR152W	0.568707	YLR332W	0.446652	YDL104C	0.127543
YDR007W	0.208748	YAL030W	0.568513	YCL057C-A	0.44617	YDL105W	0.839655
YDR009W	0.162137	YBR108W	0.568387	YER101C	0.445997	YDL106C	-0.0994584
YDR011W	-0.559105	YER071C	0.567202	YFR040W	0.444871	YDL107W	0.367753
YDR012W	-0.697339	YHR037W	0.567	YPR119W	0.444461	YDL108W	0.477393
YDR013W	0.137529	YMR252C	0.566159	YCL039W	0.443972	YDL108W	1.25509
YDR014W	-0.028204	YKL018C-A	0.565372	YML130C	0.443924	YDL109C	2.50922
YDR021W	-0.0694869	YDL005C	0.565369	YCR024C	0.443608	YDL110C	0.718093
YDR023W	-0.216439	YDR503C	0.565311	YGL124C	0.443312	YDL111C	-0.272449
YDR025W	-0.506603	YEL071W	0.565282	YER058W	0.44329	YDL112W	-0.343392
YDR031W	1.22987	YOR195W	0.565057	YGR196C	0.441808	YDL113C	0.153078
YDR033W	-1.42682	YBR160W	0.565056	YDR493W	0.441622	YDL114W-A	1.31264
YDR035W	0.192849	YKL170W	0.564913	YOL072W	0.441235	YDL114W	1.99447
YDR037W	-0.497	YHL002W	0.564762	YLL040C	0.441198	YDL115C	0.176983
YDR041W	0.505448	YBL040C	0.563007	YPR049C	0.4405	YDL115C	2.8846
YDR044W	1.47449	YOL058W	0.562634	YOR372C	0.440263	YDL116W	-0.328
YDR047W	-0.642944	YLR051C	0.562351	YKL085W	0.439977	YDL117W	-0.322484
YDR049W	-0.244631	YML119W	0.562199	YJR130C	0.439094	YDL118W	1.54946
YDR055W	1.95237	YPL249C	0.562186	YGL066W	0.438669	YDL119C	-0.132914
YDR057W	-0.12407	YMR204C	0.560375	YMR261C	0.43822	YDL120W	-0.396867
YDR060W	-0.520423	YKL089W	0.560092	YOR279C	0.435869	YDL121C	-0.186112
YDR061W	-0.596813	YBR177C	0.558828	YML071C	0.434862	YDL122W	-0.262735
YDR062W	-0.386924	YBL026W	0.558698	YBR254C	0.434139	YDL123W	0.847884
YDR063W	0.312056	YLR248W	0.55851	YBL086C	0.434015	YDL124W	0.18237
YDR064W	-0.507062	YGL125W	0.557764	YJR138W	0.430714	YDL125C	0.328005
YDR065W	-0.595429	YGL179C	0.557106	YDR003W-A	0.430198	YDL125C	0.609709
YDR068W	0.28534	YER116C	0.556644	YLR191W	0.429641	YDL126C	-0.262417
YDR073W	-0.369375	YOR287C	0.555659	YGL006W	0.429155	YDL127W	-0.650112
YDR074W	0.267007	YKL040C	0.554559	YOR124C	0.428395	YDL128W	-0.440017
YDR075W	-0.354545	YJL004C	0.554536	YKL096W-A	0.427363	YDL129W	-0.175566
YDR076W	-0.263708	YPR081C	0.554532	YOL117W	0.425806	YDL130W-A	-0.144835
YDR077W	1.65543	YKR037C	0.554297	YJR035W	0.424886	YDL130W	-0.502799
YDR079W	0.589311	YNL122C	0.553046	YDR311W	0.423367	YDL130W	1.30289
YDR080W	-0.405451	YBR161W	0.552821	YDR131C	0.422681	YDL131W	-0.376354
YDR082W	-0.0549466	YNL306W	0.551705	YPL124W	0.422349	YDL132W	-0.260072
YDR083W	-0.371462	YLR211C	0.550363	YAL039C	0.420716	YDL133C-A	-0.574678
YDR089W	-0.597445	YGL227W	0.549917	YER022W	0.420258	YDL133W	0.641447
YDR092W	0.204185	YBL086C	0.549436	YKL201C	0.419546	YDL134C	-0.307194
YDR093W	-1.08416	YDL105W	0.548203	YOL054W	0.41934	YDL135C	-0.151719
YDR096W	-0.0076153	YNL214W	0.548027	YPL191C	0.418485	YDL136W	-0.449002
YDR099W	-0.0971119	YMR139W	0.547459	YDR057W	0.417996	YDL136W	1.0653
YDR100W	0.718791	YDR502C	0.547108	YOR228C	0.417145	YDL137W	-0.443549
YDR103W	-0.450549	YPL247C	0.546823	YBR068C	0.417126	YDL137W	-0.159379
YDR108W	-0.0134908	YHL010C	0.546114	YKR067W	0.416367	YDL138W	-0.0471742
YDR110W	-0.528735	YNR024W	0.545247	YLR274W	0.416042	YDL139C	0.600906
YDR115W	0.775029	YGL011C	0.545093	YBR275C	0.415434	YDL140C	-0.356254
YDR118W	-0.15416	YNL250W	0.544342	YLR436C	0.414718	YDL141W	0.0411386
YDR119W	-0.736491	YKL006C-A	0.544176	YPL236C	0.414257	YDL142C	-0.283373
YDR119W-A	1.50695	YLR443W	0.543917	YDR204W	0.413088	YDL143W	-0.346768
YDR121W	0.0970017	YDR411C	0.543796	YOR043W	0.412172	YDL144C	-0.301254
YDR122W	-0.0303346	YBL093C	0.543005	YNL233W	0.41187	YDL145C	-0.300485
YDR126W	0.0706468	YML091C	0.542817	YDR533C	0.411108	YDL146W	0.195649
YDR127W	-0.832729	YMR269W	0.542798	YDR484W	0.411023	YDL147W	-0.184328
YDR128W	-0.627964	YJL203W	0.542007	YPR141C	0.410188	YDL148C	-0.0924989
YDR137W	-0.0687387	YLR170C	0.541932	YJR019C	0.409894	YDL149W	0.311198
YDR138W	-0.552092	YLR369W	0.540508	YOR181W	0.409806	YDL150W	-0.100378
YDR140W	0.413894	YLR395C	0.540361	YOL013C	0.409473	YDL151C	0.481471
YDR145W	-0.0138673	YHR147C	0.540152	YMR148W	0.409387	YDL152W	Inf
YDR147W	0.0462107	YIL124W	0.53923	YJR142W	0.409178	YDL153C	-0.303833
YDR150W	-0.811403	YDL238C	0.538076	YJR080C	0.40894	YDL154W	1.83371
YDR152W	0.226101	YLL012W	0.537971	YPL154C	0.407969	YDL155W	-0.0139287
YDR158W	-0.55816	YDR201W	0.537757	YNL074C	0.407535	YDL156W	0.214716
YDR159W	-0.469416	YKL002W	0.536866	YDR166C	0.407404	YDL157C	-0.259494
YDR160W	-0.57063	YIL077C	0.536545	YNL084C	0.405278	YDL158C	-0.125575
YDR161W	0.018241	YKL082C	0.535333	YOR047C	0.405093	YDL159C-B	1.12818
YDR163W	0.703089	YOL019W	0.533211	YOR058C	0.405058	YDL159W-A	Inf
YDR165W	-0.581301	YLR431C	0.532993	YKR017C	0.40496	YDL159W	-0.0718103
YDR167W	0.823801	YKR068C	0.531632	YCR071C	0.404446	YDL160C-A	0.446055
YDR168W	0.0743442	YML112W	0.529609	YBR255C-A	0.403536	YDL160C	-0.354457
YDR171W	1.20431	YLR145W	0.529389	YGR274C	0.40265	YDL161W	-0.305611
YDR172W	-0.242889	YLR355C	0.527497	YCR009C	0.402533	YDL162C	1.94962
YDR174W	-0.366311	YMR073C	0.527302	YDR499W	0.402291	YDL163W	-1.07107
YDR176W	-0.606625	YPR158W	0.527204	YGL116W	0.40057	YDL164C	-0.0534755
YDR177W	0.258435	YCL039W	0.527183	YER172C	0.400562	YDL165W	-0.368248
YDR178W	0.913594	YPR051W	0.526414	YMR160W	0.400312	YDL166C	-0.51628
YDR179W-A	0.0750186	YJL023C	0.526241	YPL152W	0.400171	YDL167C	-0.180311
YDR180W	-0.687366	YDL200C	0.525788	YKL104C	0.39951	YDL168W	-0.282752
YDR182W	0.059667	YOR226C	0.525376	YMR240C	0.397795	YDL169C	-0.529407
YDR183W	0.045559	YDR436W	0.525249	YDR325W	0.396782	YDL170W	1.05475
YDR188W	0.168034	YDR374W-A	0.525139	YOL151W	0.396118	YDL171C	-0.241855
YDR189W	-0.428754	YKR083C	0.52463	YOR069W	0.395698	YDL172C	2.01135
YDR191W	-0.248317	YGR028W	0.524285	YDL209C	0.395589	YDL173W	-0.426933
YDR195W	-0.0224935	YPL051W	0.522949	YJL171C	0.393565	YDL174C	-0.0446575
YDR197W	0.0259098	YBR278W	0.522673	YNR031C	0.393399	YDL175C	0.0842109
YDR201W	0.557579	YJL143W	0.521764	YDR306C	0.391866	YDL176W	0.572586
YDR204W	0.613989	YGR003W	0.521756	YPR047W	0.391113	YDL177C	0.925132
YDR205W	-0.0729627	YJL006C	0.521573	YER093C-A	0.391052	YDL178W	-0.31064
YDR206W	-0.860047	YJL053W	0.520579	YCR027C	0.390872	YDL179W	0.0311962
YDR208W	-0.342423	YBL010C	0.519249	YLL013C	0.390074	YDL180W	-0.183359
YDR210W	0.305896	YDL048C	0.5192	YLR094C	0.38824	YDL181W	-0.452206
YDR211W	-0.324363	YPR040W	0.519107	YAR031W	0.387692	YDL182W	-0.352505
YDR212W	0.184979	YDL091C	0.518621	YCR086W	0.387522	YDL183C	0.938593
YDR213W	0.360691	YGL242C	0.518286	YKR031C	0.387244	YDL184C	-0.588838
YDR214W	-0.796427	YNL251C	0.518267	YCR004C	0.386733	YDL185C-A	0.659984
YDR216W	1.20342	YDL046W	0.517153	YCL027W	0.386251	YDL185W	-0.26569
YDR221W	-0.412972	YIL017C	0.516647	YIL156W-B	0.384988	YDL186W	0.835115
YDR222W	-0.801595	YIL157C	0.514772	YOL100W	0.384404	YDL187C	1.49312
YDR225W	0.426006	YDR350C	0.513758	YGL110C	0.382597	YDL188C	-0.399441
YDR226W	-0.498176	YJL034W	0.513676	YJL163C	0.381994	YDL189W	-0.343567
YDR227W	-0.669631	YML095C	0.513019	YBR016W	0.38195	YDL189W	-0.294395
YDR229W	-0.234998	YJL174W	0.511722	YDR322W	0.381398	YDL190C	-0.176606
YDR232W	-0.252685	YPL020C	0.510314	YDR287W	0.381295	YDL191W	-0.46639
YDR234W	0.3514	YKL167C	0.51019	YBR188C	0.381023	YDL191W	0.759528
YDR235W	-0.612202	YER104W	0.50908	YJL047C	0.379655	YDL192W	-0.466457
YDR237W	0.00053642	YKL096W-A	0.508904	YNL037C	0.379116	YDL193W	-0.16745
YDR242W	2.04332	YGL108C	0.508898	YPL134C	0.379093	YDL194W	-0.140308
YDR244W	0.042725	YJL031C	0.50772	YML015C	0.376712	YDL195W	-0.331313
YDR245W	-0.253998	YPL099C	0.505805	YNL310C	0.375515	YDL196W	1.49937
YDR246W	0.66391	YDR479C	0.505367	YNR019W	0.375456	YDL197C	2.26308
YDR247W	-0.178931	YDR286C	0.505326	YOR275C	0.375145	YDL198C	-0.508366
YDR251W	-0.263496	YER100W	0.504562	YBR287W	0.37455	YDL199C	0.0400447
YDR252W	-0.819782	YPR165W	0.503552	YGL018C	0.374133	YDL200C	0.246482
YDR254W	-0.413824	YBR257W	0.502845	YPL031C	0.37409	YDL201W	-0.267109
YDR262W	0.312985	YBR114W	0.502514	YBL059C-A	0.37351	YDL202W	-0.547449
YDR265W	-0.04095	YLR216C	0.502292	YPR159W	0.373131	YDL203C	0.195292
YDR268W	0.128761	YNR006W	0.502173	YDR390C	0.372683	YDL204W	1.67983
YDR270W	-0.518129	YDL054C	0.501719	YDR411C	0.372279	YDL205C	-0.373387
YDR272W	0.459402	YDR148C	0.501548	YDR463W	0.372033	YDL206W	0.61133
YDR275W	0.516497	YJL020C	0.501471	YMR189W	0.371382	YDL207W	0.185882
YDR279W	-0.337509	YBR298C	0.501436	YBR272C	0.371103	YDL208W	-0.412287
YDR280W	0.0171485	YMR192W	0.500533	YBL010C	0.369413	YDL209C	-0.0578002
YDR285W	-0.0266659	YKL186C	0.500204	YKL010C	0.369193	YDL210W	0.176587
YDR287W	0.723053	YER098W	0.499237	YOL019W	0.368601	YDL211C	-0.405755
YDR288W	-0.238912	YMR055C	0.496609	YPL057C	0.368329	YDL212W	-0.409659
YDR291W	-0.0570661	YNL164C	0.495795	YDR052C	0.368122	YDL213C	-0.0519587
YDR296W	0.402624	YNL110C	0.494281	YGR048W	0.368118	YDL214C	2.1704
YDR297W	0.781537	YOR155C	0.494235	YPR018W	0.36623	YDL215C	1.72601
YDR299W	-0.100427	YOR258W	0.49423	YPL206C	0.366218	YDL216C	0.839156
YDR301W	-0.65754	YBR007C	0.492052	YGR086C	0.365906	YDL217C	0.264181
YDR302W	0.281819	YPL183W-A	0.49162	YOR018W	0.365851	YDL218W	1.23303
YDR307W	-0.11811	YBR089C-A	0.490452	YLR319C	0.365254	YDL219W	0.22408
YDR311W	-0.263615	YBR029C	0.490396	YKL206C	0.364851	YDL219W	0.242922
YDR312W	-0.0372796	YGL110C	0.489441	YGL044C	0.36483	YDL220C	0.307558
YDR316W	0.415644	YGR002C	0.48836	YGL013C	0.364535	YDL221W	0.339379
YDR317W	-0.611081	YML041C	0.487616	YOR155C	0.363371	YDL222C	0.100528
YDR318W	0.264014	YDR044W	0.485443	YPL097W	0.362578	YDL223C	1.42553
YDR321W	-0.515844	YDR339C	0.485074	YPR111W	0.360496	YDL224C	-0.365932
YDR322W	0.177879	YJL165C	0.48462	YIR036C	0.359779	YDL225W	-0.48477
YDR325W	-0.496903	YPL108W	0.483551	YPL120W	0.359325	YDL226C	-0.129087
YDR330W	-0.455493	YBR291C	0.482158	YOL026C	0.359214	YDL227C	-0.341037
YDR331W	-0.163097	YKL046C	0.482114	YGL006W-A	0.358864	YDL228C	-0.174908
YDR332W	-0.63918	YJL104W	0.481143	YDL099W	0.358649	YDL229W	-0.373176
YDR334W	-0.865134	YHR161C	0.480714	YBR081C	0.358414	YDL230W	-0.0440215
YDR335W	-0.662645	YOR286W	0.480637	YNR049C	0.357747	YDL231C	1.70504
YDR336W	-0.843938	YER058W	0.479976	YKL069W	0.357465	YDL232W	-0.54789
YDR337W	0.297996	YPR045C	0.479748	YPL020C	0.357313	YDL233W	-0.176045
YDR347W	0.0331526	YDR329C	0.479528	YDR407C	0.357083	YDL234C	0.0350923
YDR351W	-0.0117504	YHR176W	0.479333	YPL260W	0.35602	YDL235C	-0.489834
YDR352W	-0.689005	YFL038C	0.479254	YOR142W	0.355262	YDL236W	-0.41553
YDR353W	-0.136534	YNL099C	0.477998	YJL158C	0.354781	YDL237W	-0.00724585
YDR354W	-0.230441	YDR512C	0.477153	YDR097C	0.354657	YDL238C	0.854566
YDR356W	-0.433539	YNR037C	0.476501	YDR520C	0.354375	YDL239C	1.44736
YDR358W	0.707868	YLR314C	0.475902	YNL102W	0.354226	YDL240C-A	Inf
YDR363W	-0.0711403	YFL013C	0.474849	YAL001C	0.354095	YDL240W	-0.434789
YDR363W-A	0.0527814	YBR166C	0.47243	YFR016C	0.351845	YDL241W	0.536695
YDR367W	-0.286599	YOR123C	0.472196	YNL262W	0.351798	YDL242W	2.01092
YDR368W	-0.423957	YLR449W	0.471503	YLR369W	0.350003	YDL243C	2.15133
YDR371W	-0.199579	YPL248C	0.471256	YKL139W	0.349867	YDL244W	0.758543
YDR374W-A	0.0266463	YFL017W-A	0.471177	YGL095C	0.349796	YDL245C	1.50921
YDR376W	-0.11635	YPL214C	0.471064	YMR145C	0.34942	YDL246C	#NAME?
YDR377W	0.120664	YDR463W	0.470731	YPL024W	0.348746	YDL247W-A	1.1142
YDR379W	-0.130612	YFR045W	0.470154	YNR034W	0.348562	YDL247W	1.58104
YDR380W	-0.0855153	YJL164C	0.469999	YOR280C	0.347788	YDL248W	1.06351
YDR381W	-0.206717	YDR397C	0.469713	YIR004W	0.347425	YDR001C	0.192496
YDR382W	-0.604511	YML057W	0.469094	YDR507C	0.346582	YDR002W	-0.321376
YDR385W	-1.02147	YOR288C	0.468991	YNR040W	0.346474	YDR003W-A	0.597443
YDR386W	0.37819	YJL096W	0.468499	YNL173C	0.34571	YDR003W	0.543589
YDR388W	-0.0031487	YDR054C	0.467893	YML103C	0.345316	YDR004W	1.61753
YDR389W	-0.554586	YNL107W	0.467873	YCR038C	0.345117	YDR005C	0.846691
YDR392W	0.204878	YGR246C	0.466822	YLR064W	0.343718	YDR005C	0.281859
YDR393W	-0.323115	YPL059W	0.466704	YBR039W	0.343221	YDR006C	-0.14108
YDR394W	-0.196377	YPR159W	0.465918	YDL105W	0.342738	YDR007W	2.01111
YDR395W	-1.03417	YNL166C	0.46551	YGL091C	0.341965	YDR008C	2.36802
YDR398W	-0.243528	YGL164C	0.465327	YDR054C	0.341711	YDR009W	1.24716
YDR399W	-0.0699591	YDR505C	0.464798	YNL126W	0.341647	YDR010C	-0.295663
YDR403W	0.713645	YAL059W	0.464204	YPL099C	0.341391	YDR011W	-0.15268
YDR405W	0.377175	YNL052W	0.464095	YBR046C	0.341384	YDR012W	-0.380437
YDR406W	1.14479	YLR309C	0.463511	YML095C	0.341245	YDR013W	0.932617
YDR409W	-0.102179	YJL115W	0.463109	YKR100C	0.340476	YDR014W-A	0.253167
YDR412W	0.376589	YDR337W	0.463096	YBL045C	0.340407	YDR014W	0.934891
YDR416W	-0.456015	YMR244C-A	0.46233	YPL173W	0.34	YDR015C	#NAME?
YDR418W	-0.61887	YHL019C	0.462066	YER073W	0.339886	YDR016C	0.00412953
YDR419W	-0.0035395	YDL121C	0.461997	YAR033W	0.338747	YDR017C	0.457858
YDR420W	-0.327976	YLR152C	0.461791	YML064C	0.33718	YDR018C	0.857762
YDR421W	-0.0939164	YGR132C	0.459455	YNL055C	0.33644	YDR019C	0.43165
YDR425W	0.356378	YER143W	0.456109	YAL024C	0.335538	YDR020C	0.838907
YDR427W	0.151367	YMR115W	0.455867	YBR023C	0.33426	YDR021W	0.208671
YDR434W	0.0461512	YKR065C	0.45578	YHR082C	0.333506	YDR022C	1.57362
YDR436W	0.385902	YDL113C	0.45498	YNR041C	0.331487	YDR023W	-0.232417
YDR439W	-0.0574069	YDR041W	0.453804	YJL194W	0.331106	YDR024W	0.933707
YDR440W	-0.425778	YOR176W	0.453062	YFR004W	0.330469	YDR025W	-0.40157
YDR444W	-0.493736	YER014W	0.452781	YGL151W	0.330309	YDR025W	-0.0450694
YDR448W	-0.598574	YGR232W	0.452754	YDR458C	0.329471	YDR026C	0.742032
YDR450W	-0.640889	YJL206C	0.452024	YJL055W	0.32882	YDR027C	-0.240719
YDR452W	-0.365766	YOR075W	0.451944	YLR246W	0.326451	YDR028C	-0.086622
YDR456W	-0.134985	YKR030W	0.450413	YOR003W	0.32596	YDR029W	0.666008
YDR457W	-0.892804	YDR313C	0.450009	YNL116W	0.325912	YDR030C	-0.0229968
YDR460W	-0.0585134	YDL166C	0.449495	YMR262W	0.324308	YDR031W	-0.524898
YDR461W	0.59333	YDR485C	0.449438	YBR158W	0.323626	YDR032C	-0.211011
YDR462W	0.432708	YGL091C	0.448999	YDR283C	0.321728	YDR033W	-0.257519
YDR463W	0.0310638	YGR167W	0.448268	YPL158C	0.3207	YDR034C-A	0.412657
YDR464W	-0.534061	YLR421C	0.447165	YOR147W	0.317894	YDR034C-D	1.73289
YDR466W	-0.252327	YDL027C	0.446909	YJR121W	0.317311	YDR034C	0.655832
YDR469W	0.0246023	YHR072W-A	0.446677	YDR244W	0.315539	YDR034W-B	0.0463311
YDR471W	-0.0910244	YLR135W	0.445894	YDR485C	0.31516	YDR035W	-0.37915
YDR472W	0.0122736	YKR067W	0.445746	YER141W	0.31493	YDR036C	0.0926487
YDR477W	-0.287454	YGL166W	0.445657	YKL126W	0.314791	YDR037W	-0.325234
YDR478W	-0.134549	YNL046W	0.445412	YLR373C	0.313822	YDR038C	0.085631
YDR483W	-0.344539	YAL027W	0.44476	YPL150W	0.313731	YDR039C	-0.0907611
YDR484W	-0.385628	YPR196W	0.443098	YPL240C	0.313401	YDR040C	-0.102513
YDR489W	0.0773877	YDR151C	0.442818	YJR076C	0.311865	YDR041W	-0.102384
YDR492W	0.921703	YDR002W	0.442587	YGR100W	0.310905	YDR042C	0.00299696
YDR493W	0.0470748	YJR119C	0.442257	YIL063C	0.310125	YDR043C	-0.507947
YDR494W	0.203684	YBR193C	0.441691	YOR281C	0.309147	YDR044W	-0.23316
YDR499W	-0.396202	YPR191W	0.441061	YCR002C	0.30876	YDR045C	0.194868
YDR501W	-0.432878	YNL011C	0.441032	YNL300W	0.307006	YDR046C	-0.251692
YDR510W	-0.112337	YML071C	0.440584	YDR240C	0.305869	YDR047W	1.04945
YDR511W	0.636893	YGL161C	0.440531	YGR098C	0.304978	YDR048C	0.904942
YDR513W	0.699503	YLR457C	0.438435	YLL001W	0.30446	YDR049W	0.18534
YDR515W	-0.271466	YJL084C	0.438044	YIL068C	0.304366	YDR050C	-0.478316
YDR517W	-0.0696221	YLR191W	0.43787	YGL161C	0.303178	YDR051C	-0.172732
YDR518W	0.52418	YBR035C	0.437358	YLR067C	0.302887	YDR052C	-0.316943
YDR519W	-0.227451	YGL231C	0.436764	YDL029W	0.301511	YDR053W	-1.22218
YDR525W-A	1.61128	YOR189W	0.436334	YGR084C	0.301307	YDR054C	0.0461001
YDR527W	-0.8449	YOL030W	0.436166	YNL229C	0.300928	YDR055W	-0.459971
YDR528W	-0.6393	YGR237C	0.435869	YNL046W	0.29998	YDR056C	-0.418352
YDR531W	-0.211882	YCL057C-A	0.435572	YJR161C	0.299052	YDR057W	0.18843
YDR538W	-0.762178	YDR316W	0.43445	YKR065C	0.295489	YDR058C	-0.143024
YDR539W	-0.813992	YAL017W	0.434053	YJL065C	0.29491	YDR059C	-0.365008
YEL073C	3.19698	YBR077C	0.433799	YDR460W	0.293808	YDR059C	-0.713642
YEL068C	0.119748	YHR002W	0.433673	YLL027W	0.293078	YDR060W	-0.143702
YEL064C	-0.100423	YKL042W	0.433507	YBR193C	0.291485	YDR061W	0.013583
YEL063C	-0.126563	YNL239W	0.433415	YHR192W	0.287651	YDR062W	-0.296434
YEL061C	-0.7999	YGR169C-A	0.433283	YLR103C	0.287596	YDR063W	0.377159
YEL060C	1.8572	YER094C	0.432937	YMR001C	0.286078	YDR064W	-0.535226
YEL059C-A	0.463856	YBL061C	0.432687	YKR006C	0.284411	YDR064W	2.03419
YEL055C	-0.969055	YDR495C	0.432445	YIL116W	0.284236	YDR065W	1.11029
YEL054C	-0.591554	YJR076C	0.430935	YNL260C	0.282928	YDR066C	0.13817
YEL053C	-0.517479	YIL138C	0.430494	YOR123C	0.282694	YDR067C	0.0465275
YEL050C	-0.145376	YDR468C	0.428767	YCR019W	0.281279	YDR068W	0.112108
YEL048C	-0.509887	YMR003W	0.428485	YOL030W	0.280804	YDR069C	0.00354904
YEL047C	0.704086	YLR337C	0.428252	YLR199C	0.280255	YDR070C	0.416034
YEL046C	-1.24788	YJL024C	0.427341	YPL181W	0.279904	YDR071C	-0.518313
YEL039C	3.80797	YPR152C	0.426007	YGR253C	0.278877	YDR072C	-0.260844
YEL037C	-0.0434189	YOL007C	0.424492	YGR071C	0.278313	YDR073W	1.27898
YEL036C	0.0068437	YPL134C	0.422415	YFR009W	0.275862	YDR074W	-0.291058
YEL029C	-0.107157	YHL031C	0.422295	YOR163W	0.274956	YDR075W	-0.463093
YEL025C	-0.534083	YMR144W	0.421553	YML007W	0.274647	YDR076W	1.31188
YEL017C-A	-0.936297	YDL133W	0.421443	YNL156C	0.274025	YDR077W	-0.218734
YEL016C	-0.671528	YGR288W	0.421044	YIL106W	0.272134	YDR078C	1.71478
YEL009C	0.117401	YHR086W	0.421042	YLR355C	0.27202	YDR079C-A	-0.0307073
YEL005C	0.664554	YOR113W	0.420984	YBR136W	0.271908	YDR079W	-0.617087
YEL002C	-0.221828	YGR005C	0.419783	YDR489W	0.271713	YDR080W	0.20022
YEL001C	0.0321813	YNL224C	0.419247	YBR073W	0.271637	YDR081C	-0.16003
YER003C	-0.162128	YIL004C	0.419233	YDR130C	0.271192	YDR082W	2.80399
YER007C-A	-0.216982	YDR392W	0.4191	YOL136C	0.269376	YDR083W	-0.183557
YER008C	-0.619142	YDL133C-A	0.418923	YDR116C	0.268961	YDR084C	-0.389391
YER010C	0.137451	YCL041C	0.418531	YPL177C	0.267206	YDR085C	0.171724
YER017C	-0.332108	YNL136W	0.418029	YHR012W	0.266165	YDR086C	-0.124589
YER018C	-0.219686	YOL073C	0.41802	YMR179W	0.265894	YDR087C	-0.560124
YER019C-A	-0.548532	YNL222W	0.416193	YAL047C	0.264206	YDR088C	-0.478509
YER026C	1.32807	YDR121W	0.414682	YBL052C	0.263593	YDR089W	-0.0143412
YER027C	-0.532642	YOR042W	0.414664	YNL183C	0.263266	YDR090C	0.137198
YER028C	-1.13611	YOR262W	0.413344	YBR161W	0.261825	YDR091C	-0.258958
YER029C	0.614658	YEL047C	0.412899	YLR348C	0.261279	YDR092W	-0.358298
YER031C	0.185854	YKL201C	0.412849	YPR006C	0.257722	YDR092W	0.138462
YER033C	0.342778	YKL129C	0.412369	YPL084W	0.257405	YDR093W	-0.381935
YER036C	-0.381885	YGR258C	0.41127	YMR200W	0.257127	YDR094W	-0.477146
YER038C	-0.211153	YJL172W	0.410855	YOL073C	0.252384	YDR095C	1.1398
YER043C	0.330724	YDR435C	0.410435	YPL074W	0.249641	YDR096W	-0.151668
YER044C	0.527058	YDR219C	0.409802	YBL034C	0.244039	YDR097C	0.0811606
YER045C	1.07681	YDR320C-A	0.409703	YKR008W	0.242016	YDR098C-B	0.105297
YER047C	-0.0700282	YPR101W	0.408084	YDR081C	0.241415	YDR098C	-0.391354
YER048C	0.00113116	YML069W	0.407098	YKR096W	0.238843	YDR099W	-0.221364
YER050C	0.931146	YOL142W	0.406794	YDR141C	0.237837	YDR099W	-0.0961178
YER052C	-0.602908	YNL253W	0.406277	YER155C	0.235608	YDR100W	-0.154055
YER053C	1.2556	YML094W	0.40627	YGR261C	0.226754	YDR101C	-0.213034
YER053C-A	1.92375	YOR283W	0.405502	YGR281W	0.22539	YDR102C	1.87132
YER054C	1.77177	YDR493W	0.405188	YDL077C	0.222782	YDR103W	0.413628
YER055C	0.123527	YDR181C	0.404099	YOR076C	0.217992	YDR104C	-0.0835665
YER056C	-0.358472	YBR231C	0.403855	YKL209C	0.2115	YDR105C	-0.136561
YER056C-A	-0.332288	YMR009W	0.403589	YBR207W	0.20921	YDR106W	-0.17943
YER057C	-0.252051	YBL101C	0.403459	YCL052C	0.199863	YDR107C	-0.0850994
YER061C	-0.0468474	YLL060C	0.403111	YHR143W	0.194831	YDR108W	0.683832
YER062C	0.563976	YGR168C	0.402534	YPR156C	0.191608	YDR109C	1.01597
YER064C	-0.486524	YOR074C	0.402477	YLR099C	0.190915	YDR110W	0.147303
YER065C	-0.00343661	YCL056C	0.402211	YDL174C	0.182101	YDR111C	0.216636
YER071C	0.221458	YPR166C	0.402199	YGR218W	-0.175366	YDR112W	2.85014
YER075C	-0.813524	YPL260W	0.401256	YJL001W	-0.186951	YDR113C	-0.202343
YER076C	0.23197	YLR387C	0.401082	YKR001C	-0.192819	YDR114C	1.46691
YER077C	0.00830484	YOL038W	0.399585	YIL047C	-0.199079	YDR115W	-0.410426
YER078C	-0.234203	YFR014C	0.399382	YKL157W	-0.208692	YDR116C	-0.319948
YER082C	-0.25119	YDR038C	0.399378	YNL288W	-0.213219	YDR117C	-0.146431
YER083C	0.163273	YGR135W	0.398755	YPL193W	-0.214156	YDR118W-A	0.195529
YER087C-B	-0.131382	YJR142W	0.398466	YLR208W	-0.214984	YDR118W	0.591268
YER088C	0.167418	YOR259C	0.398038	YGR082W	-0.215164	YDR119W-A	-0.243325
YER088C-A	-0.0395843	YDR451C	0.397029	YER107C	-0.216803	YDR119W	-0.327337
YER089C	-0.537534	YLR110C	0.396095	YNR018W	-0.217522	YDR120C	-0.300403
YER091C	0.039426	YOR023C	0.395798	YER080W	-0.218539	YDR121W	-0.360234
YER093C	-0.254852	YAL010C	0.395785	YNL072W	-0.220099	YDR122W	-0.18175
YER093C-A	-0.135913	YOR111W	0.395458	YKR026C	-0.221437	YDR123C	0.872853
YER094C	0.657971	YDL007W	0.394811	YFL010C	-0.224205	YDR124W	1.57042
YER099C	0.20663	YDL135C	0.394271	YBR151W	-0.224575	YDR125C	1.61081
YER101C	0.584748	YMR158W	0.393583	YFL018C	-0.224636	YDR126W	0.802577
YER105C	-0.864728	YGR065C	0.39329	YLR129W	-0.227235	YDR127W	-0.306797
YER107C	-0.314248	YML027W	0.39252	YML012W	-0.227789	YDR128W	0.225598
YER109C	0.0646976	YJR039W	0.392026	YNL048W	-0.227933	YDR129C	-0.219751
YER110C	-1.13233	YKL010C	0.391786	YMR300C	-0.236692	YDR129C	0.3626
YER111C	-0.203896	YGR072W	0.390498	YGR191W	-0.239353	YDR130C	1.03222
YER113C	-0.673175	YIL076W	0.389829	YER171W	-0.23936	YDR131C	1.4357
YER114C	-0.610418	YGL144C	0.389522	YCL063W	-0.241318	YDR132C	0.203835
YER115C	-1.02198	YMR298W	0.38926	YKL014C	-0.243992	YDR133C	1.10341
YER116C	0.498377	YPR100W	0.388778	YDL126C	-0.247921	YDR134C	1.08691
YER118C	-0.246424	YML053C	0.388528	YMR203W	-0.248997	YDR135C	-0.355519
YER119C	0.325453	YHL025W	0.388457	YLL051C	-0.250353	YDR136C	0.87515
YER122C	-0.303601	YAR028W	0.388289	YDR395W	-0.250572	YDR137W	0.560898
YER124C	-0.632697	YMR185W	0.387303	YBL032W	-0.251041	YDR138W	0.465479
YER126C	0.206086	YKL206C	0.387044	YDR164C	-0.253381	YDR139C	-0.158642
YER130C	0.354004	YPL013C	0.387035	YDR172W	-0.255051	YDR139C	1.26012
YER132C	-0.701129	YDR035W	0.386918	YNL207W	-0.256706	YDR140W	0.33849
YER134C	0.176322	YHL009C	0.385471	YOR260W	-0.25674	YDR141C	-0.144877
YER137C	0.930268	YPR133C	0.385263	YOR342C	-0.257409	YDR142C	-0.337788
YER139C	0.12972	YJL059W	0.384929	YBR110W	-0.257937	YDR143C	-0.224149
YER142C	-0.0890808	YDR415C	0.384917	YEL053C	-0.258535	YDR144C	-0.215598
YER144C	0.15855	YMR233W	0.38476	YDL111C	-0.260933	YDR145W	-0.0771599
YER145C	-0.192435	YLR133W	0.38443	YMR319C	-0.261371	YDR146C	-0.0791088
YER147C	-0.0894232	YDL165W	0.384378	YBR196C	-0.2631	YDR147W	2.49517
YER149C	-0.438853	YCL059C	0.384272	YDR264C	-0.263216	YDR148C	-0.244847
YER151C	-0.551362	YJL052W	0.382323	YER003C	-0.263333	YDR149C	-0.375303
YER152C	-0.803853	YKL156W	0.382271	YCR069W	-0.263709	YDR150W	-0.21884
YER155C	-0.978751	YOR045W	0.381964	YJL078C	-0.264568	YDR151C	-0.142645
YER156C	-0.0502715	YFL034C-B	0.381517	YHR148W	-0.265458	YDR152W	-0.0741969
YER158C	0.908678	YBR256C	0.380483	YEL001C	-0.266088	YDR153C	-0.389787
YER159C	0.73846	YKR055W	0.380474	YDR212W	-0.266698	YDR154C	-0.122813
YER161C	0.00898028	YNL310C	0.379319	YFR051C	-0.267459	YDR155C	-0.139997
YER162C	0.0726742	YDL045W-A	0.378587	YGR173W	-0.26809	YDR156W	-0.498154
YER163C	0.129716	YNL260C	0.378353	YJL186W	-0.269195	YDR157W	-0.27457
YER168C	0.197436	YNR035C	0.378138	YHR106W	-0.269309	YDR158W	-0.42272
YER172C	-0.896556	YGR215W	0.37787	YOR184W	-0.26931	YDR159W	0.0932157
YER174C	-0.0636999	YLR144C	0.377718	YCR052W	-0.270941	YDR160W	1.21983
YER175C	0.959159	YOL086W-A	0.37758	YDR303C	-0.272008	YDR161W	-0.359752
YER183C	0.277182	YPL206C	0.377074	YIL041W	-0.274267	YDR162C	-0.0288978
YER184C	0.288715	YDR363W-A	0.376558	YFR021W	-0.276311	YDR163W	0.099012
YER186C	-0.524257	YCL043C	0.376467	YDR119W	-0.277614	YDR164C	-0.0714652
YEL072W	-0.122859	YLR118C	0.375416	YIL091C	-0.278115	YDR165W	0.021244
YEL071W	0.628759	YNL231C	0.37531	YLR450W	-0.279628	YDR166C	-0.00155736
YEL070W	4.3666	YBR165W	0.375302	YCR072C	-0.280562	YDR167W	-0.152251
YEL066W	0.181552	YER006W	0.374487	YNL268W	-0.280946	YDR168W	-0.280225
YEL065W	1.4575	YIR037W	0.374372	YOR056C	-0.28123	YDR169C-A	2.20172
YEL062W	-0.193067	YJR065C	0.372798	YDR510W	-0.281284	YDR169C	0.0464263
YEL058W	0.780404	YMR021C	0.372627	YPR125W	-0.281973	YDR170C	-0.34571
YEL056W	-0.532025	YMR210W	0.370535	YMR276W	-0.282529	YDR170W-A	0.350845
YEL052W	-0.116489	YKL045W	0.370332	YCR017C	-0.283368	YDR171W	-0.192156
YEL051W	-0.062954	YMR240C	0.37017	YGL012W	-0.283828	YDR172W	-0.364486
YEL044W	0.0849139	YKL075C	0.370106	YNR017W	-0.284182	YDR173C	0.0565626
YEL043W	-0.419942	YDR284C	0.368722	YDR279W	-0.284581	YDR174W	0.791889
YEL042W	-0.671098	YDR299W	0.368506	YBR291C	-0.285997	YDR175C	-0.235432
YEL041W	0.0844184	YJL068C	0.368262	YKL027W	-0.286718	YDR176W	0.0438122
YEL040W	0.744723	YBR045C	0.36817	YPL266W	-0.287258	YDR177W	-0.421637
YEL038W	0.570712	YIL008W	0.367961	YBL067C	-0.287443	YDR178W	-0.295932
YEL034W	0.0332229	YOR117W	0.367451	YLR359W	-0.28809	YDR179C	0.129119
YEL032W	-0.596523	YNL081C	0.366435	YPL265W	-0.288791	YDR179W-A	0.25405
YEL031W	-0.414972	YHR166C	0.365818	YGR199W	-0.289078	YDR180W	-0.215134
YEL030W	-0.0404013	YJL122W	0.365673	YNL163C	-0.289196	YDR181C	0.419602
YEL027W	-0.48819	YMR268C	0.365573	YOR151C	-0.289241	YDR182W-A	0.849677
YEL026W	-0.419828	YFL054C	0.365515	YLR186W	-0.291107	YDR182W	-0.210517
YEL024W	0.155744	YOL096C	0.363495	YGL055W	-0.292138	YDR183C-A	-0.0301247
YEL022W	-0.827423	YBR255W	0.363451	YER031C	-0.294492	YDR183W	0.378062
YEL021W	0.289157	YGR156W	0.363069	YPL029W	-0.294628	YDR184C	-0.198605
YEL020W-A	0.326369	YLR210W	0.362299	YDR456W	-0.295858	YDR185C	-0.801466
YEL018W	-0.144787	YLR193C	0.362158	YHR190W	-0.296137	YDR186C	-0.190527
YEL017W	0.173039	YJR047C	0.36164	YMR235C	-0.296404	YDR187C	0.0998794
YEL015W	-0.368196	YJR056C	0.361472	YLR073C	-0.296865	YDR188W	-0.354796
YEL013W	-0.113078	YDR295C	0.361154	YGL019W	-0.299398	YDR189W	0.00458024
YEL012W	0.535442	YCR071C	0.360814	YBR078W	-0.300515	YDR190C	-0.333328
YEL011W	2.22224	YPL176C	0.360523	YOL062C	-0.302005	YDR191W	-0.0731376
YEL007W	-0.62812	YGL181W	0.360404	YNL108C	-0.302453	YDR192C	-0.274671
YEL006W	-0.412585	YIL127C	0.360329	YBL042C	-0.303716	YDR193W	3.26457
YEL004W	-0.0739674	YGR278W	0.359838	YDR188W	-0.304232	YDR194C	-0.293155
YEL003W	0.226944	YPL240C	0.359521	YOL041C	-0.304371	YDR194W-A	Inf
YER001W	-0.626779	YBR111C	0.358114	YBL009W	-0.305439	YDR195W	-0.0516898
YER002W	0.507954	YDR196C	0.357099	YOR046C	-0.305523	YDR196C	0.666859
YER004W	0.165045	YDL230W	0.356269	YDR205W	-0.306425	YDR197W	-0.274539
YER005W	-0.628361	YDR056C	0.356106	YBR086C	-0.307803	YDR198C	0.445656
YER006W	0.193557	YOR157C	0.356076	YBL057C	-0.309989	YDR199W	0.924488
YER007W	-0.510552	YBR272C	0.354547	YNL085W	-0.310789	YDR200C	-0.281395
YER009W	-0.22179	YDR122W	0.354376	YNL275W	-0.311261	YDR201W	-0.184894
YER011W	1.78513	YML015C	0.352757	YPL235W	-0.312172	YDR202C	-0.123235
YER012W	0.287011	YLR363C	0.352104	YMR305C	-0.312452	YDR203W	2.27132
YER013W	-0.498766	YDR515W	0.351023	YBR248C	-0.312582	YDR204W	-0.00207387
YER014W	0.68386	YDR057W	0.350969	YPL263C	-0.313189	YDR205W	0.380028
YER015W	0.450636	YDL029W	0.350242	YJR045C	-0.314337	YDR206W	1.10908
YER016W	0.162101	YMR111C	0.35024	YDR408C	-0.314784	YDR207C	-0.0440707
YER019W	-0.359675	YLR223C	0.350144	YNL290W	-0.316177	YDR208W	-0.347516
YER020W	0.220291	YMR312W	0.350118	YPR003C	-0.316751	YDR209C	0.669703
YER021W	-0.0469845	YKL216W	0.347986	YPL050C	-0.316787	YDR210C-D	0.0962226
YER022W	-0.393055	YDR320C	0.347614	YLR088W	-0.318407	YDR210W-B	0.743242
YER023W	-0.382995	YDL225W	0.347255	YPR137W	-0.318897	YDR210W	1.29212
YER024W	1.1109	YDR244W	0.345503	YKR043C	-0.319594	YDR211W	0.0452685
YER025W	-0.247903	YER088C	0.344195	YDR353W	-0.319994	YDR212W	-0.424948
YER030W	0.519566	YDR306C	0.343911	YJL205C	-0.319998	YDR213W	-0.303134
YER032W	-0.694526	YPL118W	0.343658	YPR063C	-0.320893	YDR214W	-0.0875428
YER034W	0.862025	YBR215W	0.343399	YKL098W	-0.321009	YDR215C	2.41371
YER035W	0.502589	YMR123W	0.343113	YER089C	-0.321021	YDR216W	0.66958
YER037W	0.815196	YLL063C	0.342799	YBR281C	-0.322807	YDR217C	-0.157021
YER040W	-0.0744172	YMR029C	0.342227	YCR094W	-0.323277	YDR218C	0.603665
YER041W	-0.557471	YJL011C	0.341077	YOR332W	-0.323497	YDR219C	-0.286995
YER042W	-0.602207	YLR187W	0.341037	YDR502C	-0.325326	YDR220C	1.14726
YER046W	0.887344	YCR095C	0.339465	YLR059C	-0.325982	YDR221W	0.673283
YER048W-A	0.293298	YGL128C	0.339163	YOR085W	-0.326108	YDR222W	-0.19865
YER049W	-0.330147	YKR100C	0.338829	YPL111W	-0.32749	YDR223W	1.55688
YER051W	0.0133411	YJR050W	0.33859	YOL123W	-0.328863	YDR224C	-0.53266
YER058W	0.183347	YKL012W	0.33854	YNL066W	-0.329287	YDR225W	-0.522835
YER059W	-0.635601	YPR143W	0.338499	YBR142W	-0.329445	YDR226W	-0.54879
YER060W	0.0236378	YIL034C	0.338157	YNR021W	-0.329708	YDR227W	-0.0492746
YER060W-A	-0.308942	YDR377W	0.337602	YDR050C	-0.329767	YDR228C	0.809963
YER063W	0.234086	YDR473C	0.336679	YER183C	-0.330009	YDR229W	-0.255776
YER066W	-0.346772	YKL185W	0.336528	YJR072C	-0.330611	YDR230W	1.46597
YER067W	2.78044	YHR118C	0.336477	YDR439W	-0.332782	YDR231C	0.133437
YER068W	-0.358577	YLR292C	0.336101	YLR058C	-0.333789	YDR232W	-0.362204
YER069W	-0.987808	YER139C	0.335786	YIR002C	-0.334249	YDR233C	0.110301
YER070W	-0.170861	YGR277C	0.335358	YAL007C	-0.335162	YDR234W	-0.0691701
YER072W	-0.143223	YDR177W	0.334375	YGL211W	-0.336293	YDR235W	0.305155
YER073W	-0.452019	YBL046W	0.334187	YJL133W	-0.336606	YDR236C	1.10898
YER074W	-0.50989	YDR169C	0.333924	YMR129W	-0.337245	YDR237W	-0.581728
YER074W-A	0.22042	YDL076C	0.333713	YAL035W	-0.339811	YDR238C	-0.391769
YER079W	1.48714	YML108W	0.333639	YDR111C	-0.339997	YDR239C	0.0094441
YER080W	-0.28897	YDR297W	0.333043	YML013W	-0.340039	YDR240C	-0.178728
YER081W	-0.127636	YLR117C	0.332971	YJR117W	-0.340237	YDR241W	1.72889
YER086W	-0.512035	YCR015C	0.33271	YGL040C	-0.340574	YDR242W	1.81621
YER087W	-0.345878	YOR213C	0.332027	YDR135C	-0.341817	YDR243C	0.556184
YER090W	0.000629246	YPL232W	0.332001	YOL061W	-0.343454	YDR244W	-0.342357
YER092W	0.746732	YBL006C	0.331191	YDR047W	-0.344018	YDR245W	-0.367239
YER095W	0.207494	YHR106W	0.330906	YDR257C	-0.345025	YDR246W-A	1.29542
YER096W	1.09461	YKL189W	0.330676	YLR397C	-0.345412	YDR246W	0.28614
YER098W	0.466934	YOL053W	0.329786	YBR061C	-0.34561	YDR247W	-0.258513
YER100W	0.0886311	YOR021C	0.32958	YOR251C	-0.347188	YDR248C	-0.282116
YER102W	-0.677405	YEL024W	0.329325	YLR146C	-0.348172	YDR249C	0.677267
YER103W	1.54112	YDR412W	0.329169	YDR138W	-0.348439	YDR250C	1.77914
YER104W	0.225985	YIL105C	0.32867	YLR336C	-0.350302	YDR251W	-0.243273
YER112W	-0.31014	YKR062W	0.328624	YNL022C	-0.35085	YDR252W	1.23184
YER117W	-0.632979	YDL193W	0.328562	YNL121C	-0.352606	YDR253C	-0.47579
YER120W	-0.115918	YMR002W	0.327316	YNL189W	-0.352786	YDR254W	0.234526
YER123W	-0.539457	YER081W	0.326407	YOR166C	-0.353171	YDR255C	0.311804
YER125W	-0.636586	YGR081C	0.325806	YDR073W	-0.354761	YDR256C	0.618852
YER127W	-0.225042	YOR227W	0.325064	YDL144C	-0.355438	YDR257C	1.34965
YER128W	-0.439872	YLR176C	0.324411	YLR347C	-0.355619	YDR258C	0.0154926
YER129W	-0.706943	YDR318W	0.324018	YFL041W	-0.355661	YDR259C	0.665488
YER131W	-0.220758	YDR145W	0.322985	YPL043W	-0.355775	YDR260C	0.763236
YER133W	-0.0458328	YOL111C	0.321843	YPL145C	-0.357089	YDR261C-D	0.477193
YER136W	-0.572406	YDR372C	0.321348	YBR235W	-0.357167	YDR261C	0.1579
YER140W	-0.445591	YPR003C	0.320993	YMR318C	-0.357995	YDR261W-B	0.468031
YER141W	-0.391049	YKR017C	0.319519	YBR243C	-0.358709	YDR262W	-0.100843
YER143W	-0.157362	YNL173C	0.318887	YAL026C-A	-0.358851	YDR263C	0.913034
YER146W	0.0273624	YOR058C	0.318444	YMR079W	-0.359001	YDR264C	-0.022549
YER148W	-0.497238	YDL120W	0.317263	YKL174C	-0.360451	YDR265W	1.7618
YER150W	2.13834	YBR088C	0.316747	YNL246W	-0.361089	YDR266C	-0.230887
YER154W	-0.459643	YBR162C	0.316492	YCR023C	-0.361313	YDR267C	0.249467
YER157W	-0.24445	YNL079C	0.316219	YOL066C	-0.363045	YDR268W	0.581536
YER164W	-0.818564	YNR003C	0.315386	YMR208W	-0.363272	YDR269C	3.99682
YER165W	-1.05747	YJR019C	0.315299	YGL097W	-0.364438	YDR270W	-0.623038
YER166W	-1.01885	YIL125W	0.315181	YDL167C	-0.364727	YDR271C	2.79422
YER167W	-0.428749	YPR141C	0.31452	YLR389C	-0.365291	YDR272W	-0.386648
YER169W	0.0153118	YIL161W	0.314245	YPL126W	-0.365456	YDR273W	1.1145
YER170W	-0.202703	YHR111W	0.312562	YGL137W	-0.366006	YDR274C	-0.100678
YER171W	-0.713408	YJR063W	0.312027	YGR083C	-0.366293	YDR275W	0.499764
YER173W	0.0291533	YJR062C	0.311891	YNL062C	-0.366685	YDR276C	-0.205918
YER176W	-0.221544	YOL002C	0.311428	YJR017C	-0.366749	YDR277C	0.611993
YER177W	-0.100026	YLR082C	0.311011	YGR007W	-0.367071	YDR278C	-1.56537
YER178W	-0.122231	YGL036W	0.310638	YKL021C	-0.367113	YDR279W	0.249199
YER182W	0.756725	YAL015C	0.310431	YDL123W	-0.367797	YDR280W	-0.174545
YFL057C	0.666228	YHR017W	0.309719	YBR041W	-0.368278	YDR281C	-1.40022
YFL054C	0.308925	YMR193W	0.309125	YKL175W	-0.369331	YDR282C	0.453689
YFL048C	0.343335	YPR025C	0.309005	YGR263C	-0.369985	YDR283C	0.0306962
YFL045C	-0.439958	YLR439W	0.308721	YKL190W	-0.370031	YDR284C	-0.239555
YFL044C	-0.460114	YMR319C	0.304528	YPL183C	-0.370152	YDR285W	2.27462
YFL042C	-0.125204	YDR088C	0.304404	YEL021W	-0.372213	YDR286C	0.0818287
YFL039C	-0.361421	YLR442C	0.302981	YGR060W	-0.373191	YDR287W	0.521991
YFL038C	0.600708	YDR080W	0.301993	YLR091W	-0.37333	YDR288W	0.246608
YFL034C-B	0.257006	YJR100C	0.301888	YBL024W	-0.375549	YDR289C	-0.282268
YFL034C-A	-0.201511	YAL046C	0.301798	YPR140W	-0.376227	YDR290W	NA
YFL033C	-0.192493	YLR243W	0.301615	YGL119W	-0.376558	YDR291W	1.07805
YFL029C	-0.0397738	YDL213C	0.301577	YDR300C	-0.377457	YDR292C	-0.354765
YFL028C	0.48441	YNL217W	0.300846	YJR075W	-0.378153	YDR293C	0.220061
YFL027C	-0.039246	YMR087W	0.29956	YKL166C	-0.379266	YDR294C	-0.256292
YFL025C	-0.283982	YLR396C	0.298356	YHR132C	-0.379327	YDR295C	-0.279051
YFL024C	0.307716	YLR206W	0.298179	YKR024C	-0.379757	YDR296W	-0.425409
YFL022C	-0.547401	YML021C	0.297716	YIR012W	-0.379885	YDR297W	-0.265274
YFL018C	0.0393544	YDL004W	0.295575	YLL048C	-0.380851	YDR298C	-0.382345
YFL017C	0.0296764	YMR027W	0.295351	YGL215W	-0.382046	YDR299W	-0.0964825
YFL016C	-0.305184	YJL184W	0.295248	YNR003C	-0.382147	YDR300C	-0.395191
YFL013C	-0.291042	YGR009C	0.293681	YER120W	-0.382198	YDR301W	-0.219278
YFL010C	0.224765	YLR209C	0.2932	YPR013C	-0.383377	YDR302W	-0.455468
YFL002C	-0.120513	YDR386W	0.292582	YJL212C	-0.383477	YDR303C	-0.413784
YFR003C	1.01869	YBR170C	0.292376	YMR307W	-0.383566	YDR304C	-0.323597
YFR005C	-0.363616	YBL050W	0.291991	YOR175C	-0.384026	YDR305C	-0.248813
YFR011C	0.902947	YKL195W	0.291733	YKL073W	-0.38488	YDR305C	0.91921
YFR014C	0.0638445	YMR153W	0.289762	YOR361C	-0.385859	YDR306C	0.0893709
YFR015C	1.36064	YOR294W	0.289375	YNL292W	-0.387143	YDR307W	0.224534
YFR016C	-0.112456	YLR166C	0.289243	YGL236C	-0.387892	YDR308C	-0.20529
YFR017C	2.14337	YJL204C	0.285846	YFL002C	-0.388504	YDR309C	-0.34822
YFR018C	0.509105	YHR076W	0.285575	YLL034C	-0.389089	YDR310C	-0.283597
YFR024C-A	-0.194028	YHR181W	0.28523	YIR032C	-0.389154	YDR311W	-0.12317
YFR025C	0.360616	YIR007W	0.284647	YER090W	-0.389595	YDR312W	-0.362466
YFR028C	-0.546672	YER133W	0.284444	YML115C	-0.392352	YDR313C	0.242419
YFR031C	-0.388254	YOR131C	0.283988	YGR267C	-0.392815	YDR314C	0.965623
YFR031C-A	-0.732089	YMR072W	0.283779	YKL205W	-0.392897	YDR315C	0.582463
YFR032C-A	-0.5529	YDR427W	0.283212	YJL197W	-0.393275	YDR316W-B	#NAME?
YFR033C	-0.0387525	YGR193C	0.283099	YPL076W	-0.393309	YDR316W	-0.0633015
YFR034C	-1.0584	YKL113C	0.282678	YKL212W	-0.39387	YDR317W	0.30434
YFR037C	0.074362	YLR319C	0.282566	YGL063W	-0.394016	YDR318W	1.4807
YFR039C	-0.277774	YNL155W	0.281959	YDR245W	-0.394389	YDR318W	2.13969
YFR041C	0.198078	YOL018C	0.281698	YDL243C	-0.395494	YDR319C	0.471499
YFR043C	-0.0285984	YCR046C	0.281374	YJR078W	-0.396598	YDR320C-A	-0.565527
YFR044C	-0.322695	YKR016W	0.281317	YIL145C	-0.39727	YDR320C	0.338269
YFR046C	0.234371	YNL153C	0.281004	YOR254C	-0.398297	YDR320W-B	2.44731
YFR047C	0.214306	YPL262W	0.280768	YDL040C	-0.398764	YDR321W	-0.136684
YFR050C	0.252773	YPL026C	0.279406	YLR285W	-0.399061	YDR322C-A	-0.0934004
YFR051C	-0.243448	YMR300C	0.278901	YBR162C	-0.399279	YDR322W	-0.496441
YFR053C	1.57633	YPR180W	0.278802	YPL082C	-0.399406	YDR323C	0.0788385
YFL055W	0.0295891	YAL060W	0.277392	YGL139W	-0.400778	YDR324C	-0.365895
YFL053W	5.70496	YJR084W	0.276993	YNL220W	-0.401009	YDR325W	0.740061
YFL049W	0.0896606	YHR150W	0.276324	YLR433C	-0.401324	YDR326C	-0.328797
YFL047W	-0.203196	YBL033C	0.276136	YLR074C	-0.401385	YDR327W	0.488476
YFL046W	0.529293	YDL137W	0.273921	YHR107C	-0.401635	YDR328C	-0.0256514
YFL041W	0.265586	YHR159W	0.273739	YJL008C	-0.401663	YDR329C	-0.311137
YFL037W	-0.407425	YDL035C	0.273515	YNL016W	-0.403123	YDR330W	-0.00960198
YFL036W	-0.580536	YFL049W	0.27312	YJL208C	-0.403201	YDR331W	-0.547372
YFL034W	-0.499292	YPR103W	0.272208	YNL307C	-0.403538	YDR332W	1.38717
YFL031W	-0.196554	YDL208W	0.271491	YER149C	-0.403806	YDR333C	-0.0616345
YFL030W	0.806994	YCR004C	0.270852	YLR126C	-0.404107	YDR334W	-0.119187
YFL026W	-0.538	YOL008W	0.269804	YLL006W	-0.404653	YDR335W	-0.382182
YFL023W	-0.0805738	YFL046W	0.268946	YKL184W	-0.405756	YDR336W	1.11151
YFL021W	-0.328743	YML092C	0.267892	YCL054W	-0.406554	YDR337W	-0.493785
YFL017W-A	0.705104	YBR289W	0.267808	YLR409C	-0.406642	YDR338C	0.326259
YFL014W	5.07604	YMR260C	0.267627	YMR215W	-0.409028	YDR339C	-0.52219
YFL009W	-0.468989	YDR092W	0.267209	YCL005W-A	-0.409521	YDR340W	-0.0444949
YFL008W	-0.591803	YER126C	0.266439	YDR518W	-0.409946	YDR341C	-0.428241
YFL007W	-1.20199	YGL095C	0.266146	YNR054C	-0.410235	YDR342C	0.0705116
YFL005W	0.130258	YJL140W	0.265291	YBR229C	-0.410357	YDR343C	0.882686
YFL004W	-0.692469	YDR099W	0.264892	YBR274W	-0.410907	YDR344C	1.07323
YFL001W	-0.192538	YMR074C	0.263931	YNL118C	-0.411378	YDR345C	-0.129287
YFR001W	0.570931	YNR023W	0.263056	YDR123C	-0.41153	YDR346C	-0.310373
YFR002W	-0.302647	YNL207W	0.262873	YBR034C	-0.412264	YDR347W	-0.372304
YFR004W	0.686881	YLR241W	0.26137	YPL270W	-0.412344	YDR348C	-0.485299
YFR006W	-0.0743379	YOR353C	0.260905	YGL202W	-0.41266	YDR349C	0.408719
YFR007W	0.116663	YBR082C	0.260811	YFR018C	-0.41302	YDR350C	0.419478
YFR008W	0.354915	YNL075W	0.25881	YBL107C	-0.413212	YDR351W	-0.323761
YFR009W	-0.669315	YOR256C	0.257566	YNL090W	-0.413328	YDR352W	0.00776723
YFR010W	0.0787481	YPR133W-A	0.257528	YJL173C	-0.413388	YDR353W	-0.351251
YFR013W	-0.712756	YGR234W	0.255387	YOR165W	-0.413485	YDR354C-A	3.41769
YFR019W	-0.554775	YOL072W	0.255227	YPL254W	-0.413747	YDR354W	0.145057
YFR021W	-0.100164	YNR019W	0.254814	YJR015W	-0.41396	YDR355C	Inf
YFR022W	0.175985	YOL070C	0.249557	YDR365C	-0.414838	YDR356W	-0.316267
YFR027W	0.285088	YOR194C	0.248595	YBL036C	-0.414982	YDR357C	0.0729178
YFR029W	-0.0244042	YNL024C-A	0.24765	YJR068W	-0.415523	YDR358W	-0.108323
YFR030W	-0.90835	YBR068C	0.244596	YML008C	-0.417304	YDR359C	-0.255818
YFR038W	-0.591186	YBR251W	0.244458	YGR145W	-0.418071	YDR360W	2.0547
YFR040W	-0.548487	YPL098C	0.24322	YER056C	-0.419309	YDR361C	0.155277
YFR042W	0.394095	YOR280C	0.242897	YOR149C	-0.419322	YDR362C	0.322594
YFR045W	0.341377	YNL300W	0.242647	YGL203C	-0.42063	YDR363W-A	-0.0370535
YFR048W	-0.461297	YKR018C	0.242439	YOR204W	-0.420808	YDR363W	0.761714
YFR049W	0.379291	YPL173W	0.241817	YJR046W	-0.420847	YDR364C	1.55882
YFR052W	0.327005	YOL100W	0.24154	YDR036C	-0.420937	YDR365C	-0.203485
YFR055W	0.195441	YCR082W	0.241031	YHR026W	-0.421985	YDR365W-B	-0.697763
YGL257C	-0.668482	YML105C	0.238616	YHR169W	-0.422628	YDR366C	0.709168
YGL252C	0.213419	YJR035W	0.238251	YDL031W	-0.423438	YDR367W	-0.365473
YGL251C	0.0186858	YBR101C	0.237981	YOR198C	-0.423514	YDR367W	0.0786847
YGL246C	-0.0345694	YER012W	0.236017	YOL101C	-0.424818	YDR368W	-0.400439
YGL242C	0.742406	YDR087C	0.234669	YJL111W	-0.425156	YDR369C	0.699532
YGL237C	-0.0559937	YBR036C	0.234191	YDR508C	-0.425399	YDR370C	1.07008
YGL236C	-0.549937	YHR183W	0.232418	YNL245C	-0.427086	YDR371C-A	1.30987
YGL231C	0.454989	YFR010W	0.232402	YCL026C-B	-0.427183	YDR371W	0.545938
YGL229C	-0.781302	YFR050C	0.23226	YGL228W	-0.42847	YDR372C	-0.331293
YGL226C-A	-0.139913	YJL001W	0.231219	YPR164W	-0.428802	YDR373W	-0.238186
YGL224C	0.124901	YGL043W	0.23034	YER154W	-0.4289	YDR374C	-0.159148
YGL223C	-0.249918	YKL192C	0.23028	YDL112W	-0.428925	YDR374W-A	0.746395
YGL222C	0.906386	YBR279W	0.229843	YPL194W	-0.429534	YDR375C	0.173162
YGL221C	0.232311	YOR281C	0.225307	YNL280C	-0.429784	YDR376W	-0.163952
YGL219C	0.318766	YDR492W	0.225157	YOR272W	-0.430504	YDR377W	-0.0338536
YGL213C	0.166322	YOR261C	0.224959	YKL033W	-0.430773	YDR378C	0.000408073
YGL206C	-0.698753	YOR274W	0.22481	YKL110C	-0.430923	YDR379C-A	0.611334
YGL204C	-0.594741	YOL005C	0.224421	YNL264C	-0.431596	YDR379W	1.03693
YGL203C	-0.332483	YGL086W	0.222898	YJL101C	-0.432155	YDR380W	-0.594947
YGL201C	-0.535639	YNR008W	0.222139	YPR088C	-0.432519	YDR381C-A	-0.0597065
YGL200C	-0.0564129	YBR288C	0.221951	YML077W	-0.432669	YDR381C-A	0.23073
YGL194C-A	-0.833422	YCR035C	0.220554	YLR056W	-0.432977	YDR381W	-0.561276
YGL194C	-0.315948	YOL123W	0.220522	YOR118W	-0.433067	YDR381W	-0.553206
YGL190C	-0.406462	YLR026C	0.219561	YDR090C	-0.43312	YDR382W	-0.474012
YGL189C	-0.824163	YLR181C	0.218903	YGL122C	-0.433128	YDR383C	0.79789
YGL187C	-0.400717	YPR178W	0.217842	YMR042W	-0.433287	YDR384C	0.0469664
YGL186C	-0.360864	YDR071C	0.215558	YFL039C	-0.433623	YDR385W	-0.338217
YGL185C	0.49331	YGR143W	0.214198	YOR207C	-0.434643	YDR386W	1.57966
YGL184C	-0.600802	YER119C	0.213062	YJL014W	-0.434659	YDR387C	1.70411
YGL179C	0.376557	YLR276C	0.212102	YLR196W	-0.434834	YDR388W	-0.474557
YGL176C	-0.272824	YJL191W	0.20868	YLR034C	-0.435525	YDR389W	-0.270658
YGL175C	-0.25812	YML058W	0.208333	YKL216W	-0.436768	YDR390C	-0.158567
YGL173C	-1.32293	YPR018W	0.207524	YBL014C	-0.437155	YDR391C	0.888498
YGL167C	-0.527645	YGR026W	0.206575	YBR127C	-0.437738	YDR392W	0.228758
YGL164C	-0.208079	YBL045C	0.205128	YLR175W	-0.438156	YDR393W	-0.0577894
YGL163C	-0.069967	YCR030C	0.204856	YGR079W	-0.439293	YDR394W	-0.354127
YGL161C	0.570851	YGR253C	0.204269	YHR133C	-0.439363	YDR395W	-0.439842
YGL154C	0.21418	YPL178W	0.203947	YGR185C	-0.439465	YDR396W	-0.933754
YGL150C	-0.610822	YDR328C	0.201949	YKL210W	-0.439908	YDR397C	-0.272353
YGL147C	-0.689319	YPL215W	0.201585	YNR030W	-0.440206	YDR397C	0.207362
YGL144C	0.0268017	YOR372C	0.200315	YGL240W	-0.440766	YDR398W	-0.138624
YGL143C	-0.4237	YLR148W	0.199556	YEL031W	-0.44117	YDR399W	0.245819
YGL142C	-0.413171	YPR086W	0.198822	YDL121C	-0.443424	YDR400W	-0.0345664
YGL140C	-0.396555	YDR388W	0.197713	YDR483W	-0.443696	YDR401W	1.2225
YGL136C	-0.380632	YOR132W	0.196303	YDR165W	-0.444245	YDR402C	3.2561
YGL131C	-0.0797347	YOR230W	0.193215	YPL162C	-0.444767	YDR403W	1.38609
YGL129C	-0.0789772	YPL266W	0.190383	YOR262W	-0.447714	YDR404C	-0.229187
YGL128C	0.479621	YNL312W	0.189339	YOR174W	-0.447725	YDR405W	-0.219406
YGL127C	0.36129	YLR274W	0.187721	YCR093W	-0.44777	YDR406W-A	0.584722
YGL124C	-0.00564398	YBL051C	0.187092	YDR140W	-0.449279	YDR406W	1.22207
YGL122C	-0.0997723	YNL161W	0.186833	YER178W	-0.449292	YDR407C	-0.384522
YGL121C	3.27124	YDR182W	0.185096	YBR069C	-0.449426	YDR408C	0.253623
YGL120C	-0.417482	YLL050C	0.184296	YGL171W	-0.44986	YDR409W	-0.100068
YGL112C	-0.0493509	YJR014W	0.180228	YOR356W	-0.451078	YDR410C	-0.303601
YGL110C	0.130023	YLR287C-A	0.179078	YGL014W	-0.451387	YDR411C	-0.191909
YGL108C	0.342294	YLR301W	0.177149	YLR020C	-0.451598	YDR412W	-0.380059
YGL107C	-0.211169	YLR420W	0.176657	YPL093W	-0.451874	YDR413C	-0.335585
YGL104C	-0.183806	YOR061W	0.169218	YGL238W	-0.451961	YDR414C	-0.12526
YGL095C	-0.0407248	YOR247W	0.167771	YLR075W	-0.45266	YDR415C	-0.110624
YGL094C	-0.498752	YNL322C	0.166918	YNL313C	-0.453029	YDR416W	-0.275039
YGL091C	0.136383	YNL084C	0.166816	YOL164W	-0.453335	YDR417C	-0.177741
YGL087C	0.72919	YDR168W	0.16341	YDR324C	-0.453787	YDR418W	-0.543606
YGL084C	-0.206471	YJL123C	0.156594	YPL125W	-0.454112	YDR419W	0.55658
YGL078C	-0.143752	YOL006C	-0.154449	YOR321W	-0.454373	YDR420W	-0.330748
YGL077C	1.00402	YMR079W	-0.161111	YNL286W	-0.454944	YDR421W	1.04415
YGL076C	-0.643945	YGR027C	-0.16382	YMR264W	-0.454962	YDR422C	-0.176138
YGL075C	-0.174666	YGR083C	-0.164926	YFL001W	-0.456804	YDR423C	0.199561
YGL070C	0.142129	YDR186C	-0.168826	YDR035W	-0.456886	YDR424C	-0.240716
YGL065C	-0.147863	YNL064C	-0.170691	YNL241C	-0.456911	YDR424C	0.837539
YGL064C	-0.163218	YPL242C	-0.172753	YML072C	-0.45723	YDR425W	-0.0305916
YGL061C	0.574743	YLR045C	-0.176937	YHR193C	-0.457345	YDR426C	0.26816
YGL057C	0.0031198	YBL056W	-0.178006	YDR399W	-0.457665	YDR427W	-0.38461
YGL056C	-0.451059	YHR107C	-0.179246	YGL114W	-0.459016	YDR428C	0.0667553
YGL054C	0.106831	YGL145W	-0.17953	YOR067C	-0.459142	YDR429C	-0.384719
YGL049C	-0.189171	YNL045W	-0.179634	YPL048W	-0.459403	YDR430C	-0.252217
YGL048C	0.019027	YGL093W	-0.184707	YDR488C	-0.459429	YDR431W	1.27383
YGL044C	0.20388	YKR008W	-0.188863	YLR380W	-0.459576	YDR432W	-0.268361
YGL040C	-0.47162	YGR124W	-0.190223	YKR044W	-0.459744	YDR433W	-0.349355
YGL038C	-0.932652	YHR200W	-0.191829	YIL142W	-0.460115	YDR434W	-0.349884
YGL037C	1.33813	YMR276W	-0.192232	YOR346W	-0.461169	YDR435C	0.264997
YGL035C	-0.367024	YCR037C	-0.193666	YHR117W	-0.461644	YDR436W	-0.0769912
YGL032C	0.774997	YPL218W	-0.193697	YBR079C	-0.461661	YDR437W	0.848982
YGL031C	-0.547718	YBL024W	-0.195867	YGL105W	-0.46244	YDR438W	0.774546
YGL028C	-0.965364	YOR066W	-0.197343	YER174C	-0.462533	YDR439W	0.39435
YGL027C	-0.454144	YBR058C	-0.197809	YGR216C	-0.462569	YDR440W	-0.369362
YGL026C	0.0196805	YLR028C	-0.197913	YGL193C	-0.46399	YDR441C	-0.0638597
YGL025C	-0.143099	YBR260C	-0.198007	YER005W	-0.464697	YDR442W	2.3632
YGL023C	0.192488	YFR002W	-0.198367	YHR079C	-0.464862	YDR443C	0.00705293
YGL020C	0.317146	YGL019W	-0.20108	YLR401C	-0.465369	YDR444W	0.689917
YGL018C	0.842722	YJR001W	-0.20213	YEL030W	-0.465412	YDR445C	-0.576484
YGL013C	-0.767065	YMR275C	-0.202854	YGR204W	-0.465448	YDR446W	0.0783123
YGL011C	0.396001	YOR046C	-0.203368	YMR063W	-0.465602	YDR447C	-0.596793
YGL009C	-0.754164	YOR311C	-0.203837	YJL117W	-0.467591	YDR447C	0.757547
YGL008C	-0.964926	YNL071W	-0.203936	YJL109C	-0.468272	YDR448W	0.0235812
YGL005C	0.291369	YCR011C	-0.204293	YLR137W	-0.468601	YDR449C	-0.20681
YGL004C	-0.0580073	YLR008C	-0.205465	YDR045C	-0.468943	YDR450W	-0.565124
YGL003C	-0.376329	YOR198C	-0.206617	YHR197W	-0.469536	YDR450W	-0.0247715
YGL001C	0.120862	YNR047W	-0.206901	YNL003C	-0.469816	YDR451C	-0.424192
YGR001C	-0.0808301	YOR224C	-0.207121	YOR002W	-0.470517	YDR452W	0.0456516
YGR002C	0.150752	YDL192W	-0.207137	YOL115W	-0.470539	YDR453C	0.48384
YGR005C	0.127536	YPL228W	-0.207141	YDL052C	-0.471002	YDR454C	-0.427062
YGR008C	2.4832	YEL015W	-0.211438	YML048W	-0.471191	YDR455C	3.05854
YGR009C	-0.0618635	YGR100W	-0.211973	YLL061W	-0.471401	YDR456W	0.0663103
YGR015C	0.0885272	YER087C-B	-0.213468	YBR208C	-0.472114	YDR457W	-0.319348
YGR020C	0.0626442	YDR083W	-0.213902	YHR062C	-0.472645	YDR458C	0.0927349
YGR024C	-0.199421	YML067C	-0.214571	YCR107W	-0.472832	YDR459C	1.3037
YGR027C	-0.234	YEL037C	-0.21461	YDR044W	-0.473007	YDR460W	-0.184794
YGR030C	0.264611	YGL106W	-0.215016	YDL143W	-0.47338	YDR461C-A	-0.536315
YGR033C	-0.0384368	YNL290W	-0.215112	YCR059C	-0.473884	YDR461W	-1.02037
YGR035C	0.86372	YDR261C	-0.215397	YNL151C	-0.4758	YDR462W	-0.477811
YGR036C	-0.522024	YER055C	-0.216798	YJL122W	-0.476352	YDR463W	-0.399745
YGR037C	-0.399811	YOR290C	-0.217366	YLR044C	-0.476986	YDR464C-A	NA
YGR043C	3.13202	YPL204W	-0.218094	YLR412W	-0.477697	YDR464W	-0.271363
YGR044C	0.293961	YFR037C	-0.218217	YGL200C	-0.478072	YDR465C	0.108297
YGR047C	-0.056793	YMR091C	-0.21916	YPR062W	-0.47869	YDR466W	0.232147
YGR057C	-0.0296281	YBL034C	-0.220413	YBL068W	-0.479252	YDR467C	0.407893
YGR061C	-0.652177	YLR403W	-0.220658	YNL190W	-0.48287	YDR468C	-0.195647
YGR062C	-0.267001	YNL181W	-0.221847	YCL036W	-0.483477	YDR469W	0.294754
YGR063C	0.847277	YCR053W	-0.222429	YDR198C	-0.483479	YDR470C	-0.135977
YGR065C	0.256788	YML034W	-0.222521	YDR332W	-0.484461	YDR471W	-0.473135
YGR067C	0.617087	YOR187W	-0.222559	YPR181C	-0.48468	YDR471W	1.21305
YGR068C	-0.565709	YPR088C	-0.222825	YMR146C	-0.484849	YDR472W	-0.22774
YGR071C	-0.312747	YPL139C	-0.223511	YLL053C	-0.485183	YDR473C	0.546917
YGR075C	-0.0881402	YNL242W	-0.22368	YER001W	-0.485485	YDR475C	-0.0758339
YGR076C	0.298215	YML114C	-0.224329	YOR299W	-0.486426	YDR476C	-0.0833574
YGR077C	-0.231166	YDR399W	-0.22544	YCR008W	-0.486619	YDR477W	-0.344256
YGR078C	0.272543	YBR097W	-0.225659	YCL045C	-0.48773	YDR478W	0.805547
YGR081C	0.292499	YPR019W	-0.226837	YER060W-A	-0.488144	YDR479C	0.486893
YGR083C	-0.357322	YPL256C	-0.226854	YBR176W	-0.488523	YDR480W	0.620848
YGR084C	-0.059108	YFR009W	-0.227653	YLR432W	-0.489014	YDR481C	-0.564847
YGR085C	-0.458761	YDR307W	-0.228096	YDL195W	-0.489462	YDR482C	-0.0527267
YGR086C	0.392365	YPR155C	-0.228834	YGR124W	-0.49041	YDR483W	-0.0832334
YGR095C	0.118527	YKL146W	-0.229299	YLR413W	-0.490952	YDR484W	-0.0685218
YGR098C	-0.844585	YDR304C	-0.230187	YNR028W	-0.49099	YDR485C	0.0786523
YGR102C	0.774967	YDL224C	-0.231276	YKL009W	-0.491251	YDR486C	-0.232783
YGR104C	0.220206	YML110C	-0.231787	YML080W	-0.491264	YDR487C	-0.321293
YGR106C	-0.122681	YIR012W	-0.231826	YPL047W	-0.491502	YDR488C	0.268381
YGR109C	-0.293581	YKL025C	-0.233239	YPL019C	-0.491522	YDR489W	0.0196827
YGR117C	-0.433223	YER019C-A	-0.233246	YPR041W	-0.491591	YDR490C	0.453977
YGR119C	-0.352005	YPL161C	-0.233475	YDR004W	-0.492345	YDR491C	1.43891
YGR120C	-0.0104964	YMR226C	-0.233843	YOL015W	-0.49288	YDR492W	-0.165042
YGR121C	-1.16826	YEL021W	-0.233895	YJL198W	-0.49332	YDR493W	-0.579176
YGR123C	-0.901054	YDR238C	-0.23455	YPR144C	-0.493845	YDR494W	-0.405411
YGR128C	-0.579193	YCL051W	-0.235226	YPL037C	-0.49434	YDR495C	-0.0167101
YGR130C	0.457045	YKR088C	-0.236224	YCL030C	-0.495134	YDR496C	-0.350588
YGR132C	0.584115	YLR371W	-0.236318	YDL036C	-0.495326	YDR497C	-0.0817532
YGR138C	1.73449	YLL043W	-0.23634	YDR346C	-0.496106	YDR498C	-0.205841
YGR146C	-0.307989	YMR061W	-0.236436	YIR035C	-0.496836	YDR499W	1.39811
YGR147C	0.357051	YPR173C	-0.236498	YPR052C	-0.496843	YDR500C	-0.4099
YGR148C	-0.521589	YPL234C	-0.237191	YPR170W-B	-0.499481	YDR500C	1.06562
YGR150C	-0.452266	YNL280C	-0.238048	YNL301C	-0.500175	YDR501W	0.0518334
YGR154C	0.334269	YEL001C	-0.238189	YHR170W	-0.500532	YDR502C	-0.348222
YGR158C	-0.18566	YGR106C	-0.238339	YPR196W	-0.500841	YDR503C	-0.395959
YGR159C	-0.179933	YDL051W	-0.238834	YGL088W	-0.50087	YDR504C	-0.098722
YGR161C	1.92643	YGR267C	-0.238934	YLR109W	-0.500894	YDR505C	-0.222161
YGR168C	0.143515	YPR129W	-0.239355	YMR259C	-0.501658	YDR506C	0.707887
YGR169C	-0.89648	YOR150W	-0.23966	YJL178C	-0.502816	YDR507C	-0.482321
YGR169C-A	0.15772	YDR105C	-0.239713	YFL007W	-0.50283	YDR508C	-0.124972
YGR171C	-0.415076	YOR184W	-0.24046	YDR174W	-0.503948	YDR509W	2.47926
YGR172C	0.313301	YLR088W	-0.240482	YOR154W	-0.503959	YDR510C-A	NA
YGR174C	0.777215	YJL097W	-0.24088	YMR012W	-0.504272	YDR510W	-0.4953
YGR175C	0.560316	YEL066W	-0.241757	YPL030W	-0.504282	YDR511W	-0.50096
YGR177C	-1.03581	YHR007C	-0.241836	YDL095W	-0.504335	YDR512C	-0.545512
YGR178C	-0.342136	YER141W	-0.24207	YIL110W	-0.504524	YDR513W	-0.452074
YGR179C	-0.181585	YEL033W	-0.242316	YKL029C	-0.504951	YDR514C	-0.29881
YGR180C	0.121538	YDR283C	-0.242967	YGR155W	-0.505175	YDR515W	-0.392554
YGR183C	0.381955	YER083C	-0.243301	YLR378C	-0.505351	YDR516C	-0.408581
YGR184C	-0.846522	YLR182W	-0.24368	YLR172C	-0.505423	YDR517W	-0.228281
YGR185C	0.287568	YOL034W	-0.243832	YBL004W	-0.505724	YDR518W	-0.23087
YGR187C	-0.124098	YLR023C	-0.243952	YDR062W	-0.505998	YDR519W	0.0970058
YGR188C	-0.272413	YDL100C	-0.244082	YKL176C	-0.507142	YDR520C	-0.0998222
YGR189C	1.37956	YPL246C	-0.244928	YOR246C	-0.507763	YDR521W	0.537462
YGR192C	-0.441914	YDL128W	-0.245	YHR145C	-0.508333	YDR522C	-0.876472
YGR193C	0.332204	YDL055C	-0.24564	YHR072W	-0.508461	YDR523C	0.885772
YGR194C	0.542189	YCL044C	-0.245651	YDR414C	-0.509173	YDR524C-A	1.47131
YGR196C	-0.38281	YGR284C	-0.246102	YMR177W	-0.509175	YDR524C-B	-0.249091
YGR197C	-0.275347	YEL036C	-0.246309	YKL090W	-0.50953	YDR524C	0.0670119
YGR200C	-0.640304	YNL091W	-0.246904	YEL040W	-0.509533	YDR524W-C	0.737863
YGR201C	0.269989	YGR227W	-0.246982	YBR125C	-0.511646	YDR525W-A	-0.403988
YGR202C	-0.384132	YDL061C	-0.247154	YGR276C	-0.512319	YDR525W	0.575674
YGR207C	0.690739	YBR041W	-0.247304	YDR517W	-0.513049	YDR526C	0.347211
YGR209C	0.256586	YGL023C	-0.247565	YDR060W	-0.513512	YDR527W	0.568983
YGR210C	-0.941403	YBR081C	-0.247637	YJL044C	-0.513746	YDR528W	-0.395936
YGR213C	3.97611	YDR447C	-0.24849	YMR310C	-0.51526	YDR529C	-0.277619
YGR216C	-0.226931	YDR142C	-0.250316	YJL062W	-0.515653	YDR530C	1.80832
YGR220C	0.378854	YOR254C	-0.250676	YLR002C	-0.51585	YDR531W	-0.0566619
YGR221C	-0.333543	YMR102C	-0.250827	YDL063C	-0.517159	YDR532C	0.503516
YGR223C	0.0817625	YDR268W	-0.251754	YEL002C	-0.517319	YDR533C	-0.291186
YGR229C	-0.499147	YER157W	-0.251996	YOR168W	-0.517793	YDR534C	1.69516
YGR231C	0.228068	YBR261C	-0.252126	YDR091C	-0.517821	YDR535C	#NAME?
YGR233C	-1.14246	YLR229C	-0.252727	YGR103W	-0.517823	YDR535C	2.26089
YGR235C	0.871476	YJR002W	-0.252889	YHR182W	-0.518359	YDR536W	-0.334132
YGR237C	-0.0472891	YPL235W	-0.253164	YEL068C	-0.518385	YDR537C	1.71029
YGR238C	-0.0103542	YKR072C	-0.253533	YKL055C	-0.518614	YDR538W	0.638498
YGR239C	0.00625504	YIL123W	-0.254299	YBR271W	-0.51881	YDR539W	0.35232
YGR240C	-0.659508	YDL030W	-0.254743	YNL094W	-0.519248	YDR540C	0.767033
YGR241C	-0.227018	YJR144W	-0.254992	YDR008C	-0.51993	YDR541C	0.829053
YGR244C	0.570714	YGL253W	-0.255076	YLR153C	-0.520264	YDR542W	2.82899
YGR245C	-0.827669	YPL006W	-0.256551	YDL177C	-0.521035	YDR543C	1.01694
YGR246C	0.124705	YLR406C	-0.256998	YDL170W	-0.522049	YDR544C	1.44002
YGR250C	-0.0686452	YLR372W	-0.257085	YDR492W	-0.522538	YDR545C-A	-1.1048
YGR253C	0.406295	YPL231W	-0.257126	YER007C-A	-0.522999	YDR545W	1.04397
YGR255C	0.401794	YOR070C	-0.25718	YJR132W	-0.524532	YEL001C	-0.607732
YGR257C	-0.349385	YGL116W	-0.25743	YLR185W	-0.524823	YEL002C	-0.270482
YGR258C	-0.183061	YNL206C	-0.257572	YLR429W	-0.525658	YEL003W	-0.361919
YGR261C	0.0156773	YGL129C	-0.257788	YDL145C	-0.526043	YEL003W	0.548252
YGR262C	0.171296	YDR006C	-0.257882	YHL039W	-0.526281	YEL004W	0.294677
YGR263C	-0.0138161	YPR023C	-0.258412	YOR243C	-0.527518	YEL005C	1.04521
YGR264C	-0.350076	YGL216W	-0.259	YNL219C	-0.528499	YEL006W	1.19324
YGR267C	0.0748117	YGR140W	-0.25946	YGL008C	-0.528678	YEL007W	-0.210908
YGR268C	0.606271	YML074C	-0.259521	YJR109C	-0.52972	YEL008C-A	0.436395
YGR271C-A	0.0115937	YNR029C	-0.259795	YPL028W	-0.530267	YEL008W	0.0710193
YGR274C	-0.470859	YIL156W	-0.260051	YOR201C	-0.531431	YEL009C-A	2.94049
YGR276C	-0.115995	YOR231W	-0.260274	YOR270C	-0.531955	YEL009C	0.424255
YGR277C	0.641112	YLL034C	-0.26053	YEL038W	-0.532528	YEL010W	-1.07085
YGR279C	-0.734421	YLR017W	-0.260611	YCR045W-A	-0.533209	YEL011W	0.0986547
YGR280C	0.174688	YPR170W-B	-0.262588	YER156C	-0.533214	YEL012W	-0.241407
YGR282C	0.91051	YFL029C	-0.262728	YBL020W	-0.533502	YEL012W	0.840475
YGR283C	-0.286343	YMR146C	-0.263374	YMR130W	-0.533868	YEL013W	-0.251802
YGR284C	-0.131869	YNL125C	-0.263458	YDR354W	-0.53494	YEL014C	Inf
YGR285C	-0.307916	YJR051W	-0.263652	YGR175C	-0.536352	YEL015W	-0.0332838
YGR286C	0.26277	YDR379W	-0.263803	YNL248C	-0.537392	YEL016C	1.39439
YGR287C	0.949901	YPL194W	-0.26421	YOR121C	-0.537713	YEL017C-A	-0.224876
YGR289C	1.09872	YLR197W	-0.264228	YBR107C	-0.538693	YEL017W	-0.0244974
YGL256W	-0.772501	YIL047C	-0.264487	YKR081C	-0.539493	YEL018C-A	1.11667
YGL255W	2.56915	YIL143C	-0.264631	YAL012W	-0.53983	YEL018W	0.338077
YGL254W	-0.366854	YNL246W	-0.265159	YKR056W	-0.539921	YEL019C	1.16183
YGL253W	-0.235373	YPR120C	-0.265218	YOR001W	-0.540755	YEL020C-B	-1.13408
YGL250W	0.240495	YFL016C	-0.265235	YOR315W	-0.541177	YEL020C	0.636254
YGL248W	1.41252	YDR477W	-0.265387	YDR160W	-0.5413	YEL020W-A	-0.659805
YGL247W	-0.0704094	YKR098C	-0.265572	YGL009C	-0.541627	YEL021W	-0.23539
YGL245W	-0.607077	YBR112C	-0.266598	YIL083C	-0.541688	YEL022W	-0.423139
YGL244W	0.109334	YOR260W	-0.266711	YER006W	-0.541893	YEL023C	2.118
YGL243W	-0.341693	YDL003W	-0.267243	YFR034C	-0.54203	YEL024W	-0.00982173
YGL241W	-0.444868	YER040W	-0.26752	YOR381W	-0.542188	YEL025C	1.3162
YGL238W	-0.255344	YPL157W	-0.268319	YJL134W	-0.542422	YEL026W	-0.372579
YGL234W	-0.277894	YIL096C	-0.268552	YGR001C	-0.54319	YEL027W	-0.25587
YGL233W	-0.543654	YBR125C	-0.269973	YGL169W	-0.545783	YEL028W	2.00605
YGL232W	-0.330025	YBR198C	-0.27005	YJL145W	-0.545876	YEL029C	0.0198464
YGL228W	-0.059917	YKL211C	-0.270906	YKL182W	-0.545898	YEL030C-A	2.91901
YGL227W	0.21434	YJR033C	-0.271942	YMR143W	-0.545957	YEL030W	1.77927
YGL226W	0.868446	YDL116W	-0.27209	YML014W	-0.54742	YEL031W	-0.268223
YGL225W	-0.0645707	YER183C	-0.272235	YNL149C	-0.54762	YEL032C-A	#NAME?
YGL220W	0.286953	YDL014W	-0.272246	YHL001W	-0.547992	YEL032W	-0.180499
YGL216W	-0.442101	YJL136C	-0.272793	YEL034W	-0.548333	YEL033W	-0.305064
YGL215W	-0.714878	YER022W	-0.273116	YGR054W	-0.548598	YEL034C-A	-0.37582
YGL212W	-0.228655	YPL210C	-0.273258	YOL095C	-0.548645	YEL034W	-0.321226
YGL211W	-0.313747	YAL005C	-0.273337	YNR027W	-0.548713	YEL035C	1.36037
YGL210W	-0.0771006	YER124C	-0.27388	YOR004W	-0.549802	YEL036C	-0.168652
YGL209W	-0.886298	YHR201C	-0.274339	YBR015C	-0.550659	YEL037C	-0.470506
YGL208W	0.0320279	YCR069W	-0.274443	YJR129C	-0.550844	YEL038W	-0.139449
YGL207W	-0.240368	YDR291W	-0.274452	YCL059C	-0.550894	YEL039C	0.0931996
YGL202W	-0.311417	YOR171C	-0.274831	YOL022C	-0.551042	YEL040W	-0.106292
YGL198W	0.432811	YJR017C	-0.274997	YML075C	-0.551105	YEL041W	0.865021
YGL197W	-0.484701	YHR056C	-0.275553	YJR002W	-0.55179	YEL042W	-0.374287
YGL196W	0.20672	YGL021W	-0.275599	YPL237W	-0.551942	YEL043W	0.112225
YGL195W	-1.23432	YBL068W	-0.275616	YLL031C	-0.552185	YEL044W	0.339833
YGL191W	0.936114	YLL004W	-0.276441	YML096W	-0.553018	YEL045C	1.4585
YGL181W	0.381338	YLR386W	-0.276454	YLR192C	-0.553613	YEL046C	-0.129409
YGL180W	0.109315	YBL063W	-0.277006	YJR007W	-0.553996	YEL047C	-0.224714
YGL178W	-0.199854	YGL200C	-0.277053	YGR004W	-0.555424	YEL048C	2.68256
YGL174W	0.323625	YLR426W	-0.277375	YKR053C	-0.555492	YEL049W	2.29904
YGL172W	-0.11949	YOR112W	-0.277742	YOR389W	-0.555666	YEL050C	-0.511428
YGL171W	-0.698221	YKL054C	-0.277804	YKL198C	-0.556124	YEL050W-A	-1.52563
YGL169W	-0.324113	YNL108C	-0.278079	YBL070C	-0.55621	YEL051W	-0.44183
YGL166W	0.275728	YER176W	-0.279581	YJL192C	-0.556286	YEL052W	0.309516
YGL162W	-0.387696	YER173W	-0.279776	YER145C	-0.556681	YEL053C	0.131841
YGL160W	-0.0930518	YKL135C	-0.280815	YPL095C	-0.557106	YEL053W-A	-0.333614
YGL159W	-0.340472	YDL197C	-0.281155	YDL141W	-0.557115	YEL054C	-0.441328
YGL157W	0.934636	YGR261C	-0.281236	YOR119C	-0.557596	YEL055C	-0.269498
YGL156W	1.94904	YOL069W	-0.2814	YDR161W	-0.557947	YEL056W	-0.0474149
YGL155W	-0.344546	YBR115C	-0.281457	YDR384C	-0.559068	YEL057C	0.855708
YGL153W	0.0940417	YOR238W	-0.282493	YKL080W	-0.559631	YEL058W	-0.387196
YGL151W	-0.429499	YNL047C	-0.282816	YGR037C	-0.560263	YEL059C-A	0.0210782
YGL148W	-0.256606	YDL176W	-0.282965	YHR208W	-0.562115	YEL059W	0.0736279
YGL145W	-0.233919	YNL261W	-0.283496	YHR188C	-0.562326	YEL060C	-0.23086
YGL141W	-0.165571	YHR199C	-0.284493	YDL093W	-0.562893	YEL061C	-0.263119
YGL139W	-0.0191796	YOR039W	-0.284713	YJL081C	-0.563078	YEL062W	0.91245
YGL137W	-0.197519	YNL083W	-0.285009	YDR243C	-0.563758	YEL063C	2.79996
YGL135W	-0.625535	YDR233C	-0.285412	YKR042W	-0.563817	YEL064C	0.0810369
YGL134W	-0.0485349	YER009W	-0.285618	YGR202C	-0.56512	YEL065W	0.671718
YGL133W	-0.244689	YOL093W	-0.28591	YML085C	-0.565433	YEL066W	-0.0616729
YGL130W	0.391456	YCL029C	-0.285948	YPL086C	-0.566168	YEL067C	1.40587
YGL125W	1.01161	YCR065W	-0.286104	YER078C	-0.567815	YEL068C	0.475243
YGL123W	-0.824507	YNL329C	-0.286536	YML086C	-0.568496	YEL069C	0.689029
YGL119W	-0.134903	YFL044C	-0.287525	YMR229C	-0.568597	YEL070W	0.00208748
YGL117W	0.218016	YML032C	-0.287981	YDR398W	-0.568601	YEL071W	-0.190041
YGL116W	-0.128994	YLR375W	-0.28897	YOR222W	-0.568832	YEL072W	1.30894
YGL115W	0.137445	YNL288W	-0.29001	YDR025W	-0.569504	YEL073C	2.28483
YGL114W	-0.468226	YHR063C	-0.290634	YNL024C-A	-0.569626	YEL074W	1.52609
YGL113W	-0.334996	YKR090W	-0.2913	YBR025C	-0.569761	YEL075C	NA
YGL111W	-0.164241	YDR192C	-0.291744	YOR006C	-0.571123	YEL075W-A	0.375127
YGL106W	0.326861	YBR242W	-0.292273	YOR234C	-0.571296	YEL076C-A	NA
YGL105W	-0.19972	YOR128C	-0.292285	YBR118W	-0.571314	YEL076C-A	#NAME?
YGL103W	-0.620424	YOR078W	-0.292765	YGL243W	-0.571665	YEL076C	2.97405
YGL101W	-0.277385	YOR276W	-0.292929	YPR080W	-0.571809	YEL077C	1.5697
YGL100W	0.373113	YDR326C	-0.293057	YDR012W	-0.573044	YEL077W-A	-1.32356
YGL099W	-0.403035	YNR038W	-0.293196	YFR005C	-0.573194	YER001W	-0.310278
YGL098W	0.291197	YGL225W	-0.294968	YGR178C	-0.573582	YER002W	-0.455243
YGL097W	0.117939	YGR208W	-0.295153	YKR070W	-0.573991	YER003C	-0.424629
YGL093W	-0.4111	YGR099W	-0.295283	YDR127W	-0.574402	YER003C	0.235293
YGL092W	-0.781272	YDR288W	-0.295643	YGR133W	-0.574651	YER004W	0.12217
YGL090W	-0.147268	YJL192C	-0.29665	YAL067C	-0.574821	YER005W	0.519922
YGL088W	0.512738	YGL035C	-0.296741	YIR026C	-0.57548	YER006C-A	2.45169
YGL086W	-0.364248	YDR353W	-0.297022	YDR086C	-0.575769	YER006W	-0.385199
YGL085W	0.0680278	YHR039C	-0.297141	YLR316C	-0.576527	YER007C-A	-0.259326
YGL083W	-0.494391	YDR416W	-0.297724	YGR105W	-0.576651	YER007C-A	-0.414481
YGL082W	0.0538206	YOR196C	-0.298078	YKR005C	-0.578014	YER007W	0.83941
YGL080W	0.26905	YCR024C	-0.298284	YMR080C	-0.578137	YER008C	-0.208274
YGL079W	0.0526523	YDR514C	-0.299443	YGR211W	-0.578416	YER009W	-0.315654
YGL073W	-0.442106	YOR193W	-0.300092	YHR199C	-0.578754	YER010C	-0.116642
YGL071W	-0.74008	YIL061C	-0.300324	YGR096W	-0.580096	YER011W	-0.691588
YGL068W	0.380875	YHR133C	-0.300393	YMR088C	-0.581986	YER012W	-0.319379
YGL067W	-0.529244	YKR026C	-0.300409	YLR046C	-0.582251	YER013W	-0.280123
YGL066W	-0.467132	YJL008C	-0.300607	YKL019W	-0.584824	YER014C-A	NA
YGL063W	-0.32335	YKL173W	-0.300759	YBR252W	-0.586904	YER014C-A	2.81717
YGL062W	0.372155	YDR130C	-0.300942	YDR387C	-0.586971	YER014W	-0.398638
YGL060W	-0.0264936	YBR102C	-0.301333	YDL042C	-0.587677	YER015W	0.729963
YGL059W	0.363342	YLR224W	-0.301339	YDL014W	-0.588255	YER016W	0.0609557
YGL058W	0.67782	YGR108W	-0.302484	YMR108W	-0.58922	YER017C	-0.354123
YGL055W	0.799661	YGR191W	-0.304016	YLR105C	-0.59002	YER018C	0.0510688
YGL050W	-0.580235	YNR017W	-0.30411	YLR301W	-0.590089	YER019C-A	-0.301142
YGL047W	0.443581	YCR067C	-0.304167	YEL046C	-0.591625	YER019W	-0.192852
YGL045W	0.65805	YDR333C	-0.305494	YGL142C	-0.591786	YER020W	0.191716
YGL043W	0.212452	YOR241W	-0.305859	YGL031C	-0.591879	YER021W	-0.349961
YGL041W-A	0.817177	YMR183C	-0.306033	YIL094C	-0.592425	YER022W	-0.122157
YGL039W	-0.0488392	YLR116W	-0.306697	YDR139C	-0.592806	YER023C-A	0.609734
YGL036W	-0.0348929	YOR211C	-0.30725	YNL021W	-0.593375	YER023W	-0.440686
YGL030W	-0.520588	YFL039C	-0.307456	YIL074C	-0.593539	YER024W	2.21539
YGL029W	0.479904	YLR440C	-0.307516	YKL211C	-0.593933	YER025W	-0.271518
YGL022W	-0.371998	YEL038W	-0.308144	YCR057C	-0.594557	YER026C	-0.224625
YGL021W	-0.359833	YOR059C	-0.308189	YOR323C	-0.595397	YER027C	-0.397095
YGL019W	0.270569	YGR175C	-0.308724	YOR041C	-0.595632	YER028C	1.25768
YGL017W	0.199808	YDR109C	-0.309321	YPL211W	-0.597262	YER029C	-0.305024
YGL016W	-0.447683	YPL015C	-0.309893	YMR035W	-0.59871	YER030W	-0.164413
YGL014W	-0.741168	YER131W	-0.310037	YHR007C	-0.598916	YER031C	-0.271766
YGL012W	-0.0342292	YBL016W	-0.310682	YJL217W	-0.599714	YER032W	-0.182796
YGL010W	0.988774	YPL091W	-0.310833	YBR246W	-0.600187	YER033C	0.0213593
YGL006W	-0.0203157	YJL181W	-0.311234	YGL022W	-0.600395	YER034W	-0.00413402
YGL002W	-0.0177464	YJL162C	-0.311678	YEL033W	-0.600779	YER035W	-0.256411
YGR003W	0.0475895	YNL062C	-0.311999	YNL259C	-0.601283	YER036C	-0.403436
YGR004W	-0.372293	YOL136C	-0.31208	YLR287C-A	-0.601393	YER037W	-0.354861
YGR006W	-0.159887	YPL153C	-0.313298	YOL158C	-0.6017	YER038C	1.96592
YGR007W	-0.0832431	YNL040W	-0.314129	YLR233C	-0.604092	YER038W-A	1.74423
YGR012W	-0.359339	YLR447C	-0.314965	YLR293C	-0.604703	YER039C-A	0.971399
YGR013W	0.155458	YDR419W	-0.315105	YGR162W	-0.605947	YER039C	1.48475
YGR014W	-0.805118	YBR248C	-0.31518	YLR197W	-0.606003	YER040W	-0.148161
YGR016W	0.144483	YFR039C	-0.315586	YJL026W	-0.606159	YER041W	2.06243
YGR017W	-1.04887	YLR016C	-0.315658	YCR048W	-0.6063	YER042W	-0.641376
YGR019W	1.3217	YOL105C	-0.316035	YOR236W	-0.60665	YER043C	-0.342945
YGR021W	0.156293	YLR342W	-0.316108	YLL049W	-0.60714	YER044C-A	1.71534
YGR023W	0.847159	YMR194W	-0.316126	YLL008W	-0.608553	YER044C-A	Inf
YGR026W	-0.0425115	YPL151C	-0.316534	YOR313C	-0.608629	YER044C	-0.181521
YGR028W	0.223032	YLR057W	-0.31721	YDR441C	-0.609798	YER045C	0.350801
YGR029W	0.0794219	YBR267W	-0.317606	YDL201W	-0.61033	YER046W-A	0.456188
YGR031W	-0.417276	YFR047C	-0.318068	YHR144C	-0.610484	YER046W	0.64879
YGR032W	1.04748	YIL112W	-0.318483	YAL036C	-0.610673	YER047C	-0.362841
YGR034W	-0.67163	YHR058C	-0.318624	YJL193W	-0.611392	YER048C	-0.140315
YGR038W	0.119772	YOR309C	-0.318681	YGR036C	-0.612156	YER048W-A	0.499523
YGR040W	-0.80113	YAR002C-A	-0.319148	YOR091W	-0.613077	YER049W	-0.351902
YGR041W	-1.57541	YDR227W	-0.320472	YGR245C	-0.613147	YER050C	-0.443159
YGR042W	-0.0816194	YNR041C	-0.3205	YNL162W	-0.614692	YER051W	0.337173
YGR046W	0.0930953	YGR029W	-0.320944	YOL102C	-0.615332	YER052C	-0.407829
YGR048W	0.235136	YMR289W	-0.321131	YJL121C	-0.615483	YER053C-A	-0.0418018
YGR049W	0.45322	YER057C	-0.321274	YHR072W-A	-0.615704	YER053C	0.1559
YGR052W	1.59935	YLR052W	-0.322624	YJL033W	-0.616543	YER054C	0.964357
YGR054W	-0.434628	YFL018C	-0.322733	YIL090W	-0.617485	YER055C	-0.581687
YGR055W	-0.978123	YJR013W	-0.32277	YDL060W	-0.617572	YER056C-A	-0.465135
YGR056W	-0.541615	YER080W	-0.323073	YKL180W	-0.617716	YER056C-A	0.363557
YGR058W	-0.0737261	YBR098W	-0.323788	YKR094C	-0.617966	YER056C	-0.148555
YGR060W	-0.000106815	YNL149C	-0.324041	YCL050C	-0.619602	YER057C	-0.332974
YGR070W	0.450486	YGL209W	-0.324056	YML018C	-0.619828	YER058W	-0.267067
YGR072W	-0.00122735	YMR222C	-0.324557	YNL217W	-0.620382	YER059W	-0.362002
YGR074W	0.119988	YGL160W	-0.325534	YNR063W	-0.620548	YER060W-A	0.69465
YGR079W	-0.521322	YGL151W	-0.325673	YML125C	-0.620938	YER060W	-0.249079
YGR080W	0.220539	YBR080C	-0.326117	YOR021C	-0.621286	YER061C	0.554582
YGR082W	0.112163	YIL109C	-0.326338	YER043C	-0.621618	YER062C	-0.613447
YGR088W	3.52188	YNL026W	-0.326592	YDL085C-A	-0.62237	YER063W	-0.150335
YGR089W	-0.647678	YPR004C	-0.326821	YNR032C-A	-0.622437	YER064C	-0.304832
YGR090W	-0.793201	YPR144C	-0.326938	YER025W	-0.624317	YER065C	1.51036
YGR091W	-1.0084	YML080W	-0.327144	YGL026C	-0.624445	YER066C-A	1.19603
YGR092W	0.45554	YPL245W	-0.328498	YCR024C-B	-0.624613	YER066W	2.69814
YGR093W	-0.543262	YFL034C-A	-0.328661	YEL063C	-0.626074	YER067C-A	1.68442
YGR094W	-0.935198	YLR113W	-0.329611	YAL058W	-0.628421	YER067W	-0.101162
YGR096W	-0.693041	YPL184C	-0.329932	YIL002W-A	-0.628687	YER068C-A	2.2842
YGR097W	1.00516	YDR464W	-0.329954	YHR071W	-0.630129	YER068W	-0.372376
YGR099W	-0.441182	YGR283C	-0.330366	YML124C	-0.630624	YER069W	0.320174
YGR100W	-0.246287	YFR007W	-0.330689	YLR406C	-0.631019	YER070W	-0.301967
YGR101W	-0.216425	YMR218C	-0.331214	YML031W	-0.631276	YER071C	0.207576
YGR103W	-0.0419351	YIL130W	-0.332046	YAL042W	-0.631369	YER072W	-0.851071
YGR105W	-0.26431	YMR258C	-0.332475	YJL010C	-0.631834	YER073W	-0.435842
YGR108W	-0.434695	YPR008W	-0.334416	YHR057C	-0.63263	YER074W-A	-0.180922
YGR110W	0.342778	YOR355W	-0.33462	YPR048W	-0.632802	YER074W-A	-0.168064
YGR111W	0.0266551	YDL236W	-0.33483	YER023W	-0.634185	YER074W	-0.458443
YGR112W	0.111451	YDR361C	-0.33498	YGL120C	-0.63513	YER074W	1.03577
YGR113W	-0.423118	YOL115W	-0.335207	YBR181C	-0.63557	YER075C	0.0814357
YGR116W	-0.523438	YCR024C-A	-0.335535	YLR017W	-0.635659	YER076C	2.02821
YGR118W	-0.438611	YKL179C	-0.336212	YEL055C	-0.636189	YER076W-A	1.2202
YGR122W	-0.279907	YJR009C	-0.336383	YKL106W	-0.636456	YER077C	-0.345176
YGR124W	-0.240646	YNL090W	-0.337344	YJL183W	-0.636663	YER078C	-0.136454
YGR125W	-0.187911	YGL171W	-0.338383	YPL279C	-0.637329	YER078W-A	2.80545
YGR127W	0.39928	YPL068C	-0.338445	YDR438W	-0.638152	YER079C-A	2.24584
YGR129W	0.415994	YDL088C	-0.338708	YNL069C	-0.63817	YER079W	-0.714581
YGR133W	0.326766	YKR096W	-0.339799	YOR099W	-0.638518	YER080W	-0.509848
YGR134W	-0.62126	YPR017C	-0.33984	YNL175C	-0.638803	YER081W	0.217446
YGR135W	0.295724	YGR105W	-0.340343	YDL039C	-0.639731	YER082C	-0.219603
YGR137W	0.60204	YER090W	-0.340438	YMR202W	-0.641082	YER083C	-0.238215
YGR140W	-0.336132	YOL148C	-0.342054	YHR004C	-0.641737	YER084W-A	0.460901
YGR141W	0.53276	YBL023C	-0.342134	YHL033C	-0.64193	YER084W	-0.00503005
YGR142W	0.412961	YKL182W	-0.343237	YPR110C	-0.642762	YER085C	1.29085
YGR143W	-0.0594386	YOL078W	-0.343387	YLR441C	-0.643286	YER086W	-0.332706
YGR145W	-0.0546492	YDR387C	-0.34339	YLR325C	-0.644208	YER087C-A	1.55146
YGR149W	1.0074	YLR185W	-0.343457	YDR078C	-0.645236	YER087C-B	-0.0678416
YGR153W	1.82374	YLL015W	-0.343708	YPL063W	-0.646729	YER087W	-0.0125983
YGR155W	-0.459831	YHR028C	-0.344047	YDR352W	-0.647473	YER088C-A	0.231549
YGR156W	-0.225012	YGR082W	-0.34418	YPR071W	-0.648995	YER088C	-0.181459
YGR157W	-0.0276534	YPL253C	-0.34438	YJR145C	-0.649007	YER088W-B	-0.363536
YGR161W-C	0.70224	YMR013C	-0.344546	YGL078C	-0.650566	YER089C	-0.126133
YGR162W	-0.786329	YER151C	-0.345	YNL148C	-0.651861	YER090C-A	Inf
YGR163W	0.111216	YLR398C	-0.345115	YER113C	-0.65192	YER090W	-0.435422
YGR165W	-0.0995371	YCL063W	-0.345316	YPL090C	-0.652187	YER091C-A	0.284262
[truncated: 5,474 more rows]
