# Supplementary material for: Decapping factor Dcp2 controls mRNA abundance and translation to adjust metabolism and filamentation to nutrient availability
Source: eLife journal article supplement (doi:10.7554/elife.85545), 2023-06-02
Supplement: fig2-data2 [file Figure 2 – source data 2.xlsx]

## Sheet: Sheet1
Gene ID	TE in WT (form dcp2 data)		Gene ID	stAI			gene_id	Chan et al, half-lives		YORF	CDS_length		Gene_ID	mRNA molecules in pgDW
YAL067C	0.129943		YCR087W	0.165673			Q0017	#DIV/0!		YAL001C	3573		R0010W	4.90766
YAL063C-A	-3.85782		YJL136W-A	0.166991			Q0032	#DIV/0!		YAL002W	3825		R0030W	6.50999
YAL063C	-3.10911		YBR103C-A	0.1693			Q0045	#DIV/0!		YAL003W	987		YAL001C	0.512189
YAL054C	-2.4353		YOR248W	0.179491			Q0050	2.33812		YAL004W	648		YAL002W	0.437646
YAL049C	0.560131		YBR223W-A	0.180818			Q0055	2.89726		YAL005C	1929		YAL003W	4.01518
YAL047C	-0.278713		YNR075C-A	0.187625			Q0060	#DIV/0!		YAL007C	648		YAL007C	0.580046
YAL046C	0.246634		YGL041C-B	0.188423			Q0065	#DIV/0!		YAL008W	597		YAL008W	0.660202
YAL044C	1.44609		YLR279W	0.18925			Q0070	#DIV/0!		YAL009W	780		YAL009W	0.317043
YAL043C	-0.000895715		YML116W-A	0.190147			Q0080	#DIV/0!		YAL010C	1482		YAL010C	0.325938
YAL040C	-1.87894		YHR022C-A	0.190998			Q0085	#DIV/0!		YAL011W	1878		YAL011W	0.332235
YAL039C	1.10507		YOR335W-A	0.191402			Q0092	#DIV/0!		YAL012W	1185		YAL012W	1.45824
YAL036C	0.84218		YMR086C-A	0.192611			Q0105	#DIV/0!		YAL013W	1218		YAL013W	0.408782
YAL034C	-3.28737		YKR047W	0.193674			Q0110	#DIV/0!		YAL014C	768		YAL014C	0.363097
YAL032C	0.132727		YGR176W	0.194316			Q0115	#DIV/0!		YAL015C	1200		YAL015C	0.367951
YAL031C	-0.341244		YML007C-A	0.195299			Q0120	#DIV/0!		YAL016W	1908		YAL016W	1.2927
YAL029C	-1.6306		YAR035C-A	0.195986			Q0130	#DIV/0!		YAL017W	4071		YAL017W	0.66319
YAL026C-A	-1.87766		YCR022C	0.196556			Q0140	#DIV/0!		YAL018C	978		YAL018C	0.0388128
YAL026C	-1.10814		YIL100C-A	0.197089			Q0142	#DIV/0!		YAL019W	3396		YAL019W	0.402855
YAL025C	0.659784		YFL010W-A	0.197348			Q0143	#DIV/0!		YAL020C	1002		YAL020C	0.186434
YAL024C	-1.42153		YNL130C-A	0.197488			Q0144	#DIV/0!		YAL021C	2514		YAL021C	0.661826
YAL023C	0.0822994		YHR086W-A	0.200443			Q0160	#DIV/0!		YAL022C	1554		YAL022C	0.375363
YAL022C	0.129826		YJL028W	0.201239			Q0182	#DIV/0!		YAL023C	2280		YAL023C	1.20712
YAL021C	-0.106228		YLR154W-B	0.201964			Q0250	#DIV/0!		YAL024C	4308		YAL024C	0.223878
YAL020C	-0.0421665		YKL145W-A	0.202032			Q0255	#DIV/0!		YAL025C	921		YAL025C	0.575386
YAL015C	-0.149641		YMR182W-A	0.202516			Q0275	#DIV/0!		YAL026C	4068		YAL026C	0.490712
YAL014C	-0.503795		YOR231C-A	0.203209			Q0297	#DIV/0!		YAL026C-A	438		YAL027W	0.369007
YAL010C	-0.183217		YOR343C	0.205417			YAL001C	2.93293		YAL027W	786		YAL028W	0.152541
YAL007C	0.55056		YML009W-B	0.206048			YAL002W	2.06987		YAL028W	1587		YAL029C	0.422973
YAL005C	0.780547		YOR072W-A	0.206544			YAL003W	10.5466		YAL029C	4416		YAL030W	0.617243
YAL001C	-0.595928		YEL032C-A	0.207546			YAL004W	#DIV/0!		YAL030W	467		YAL031C	0.423107
YAR002C-A	0.673381		YLR285C-A	0.209191			YAL005C	11.5765		YAL031C	2283		YAL032C	0.350745
YAR007C	0.792889		YHR071C-A	0.210052			YAL007C	7.57189		YAL032C	1140		YAL033W	0.201297
YAR014C	-0.55247		YJR128W	0.211231			YAL008W	6.62665		YAL033W	522		YAL034C	0.637368
YAR018C	-0.192286		YBR131C-A	0.211542			YAL009W	4.37053		YAL034C	1242		YAL034W-A	0.213493
YAR019C	-1.11136		YBR191W-A	0.213087			YAL010C	3.63713		YAL034C-B	354		YAL035W	1.49293
YAR023C	-1.82979		YKL202W	0.213489			YAL011W	1.20266		YAL034W-A	870		YAL036C	0.510489
YAL064W-B	-3.30341		YDR133C	0.214425			YAL012W	9.80889		YAL035W	3009		YAL037W	0.144001
YAL062W	0.940765		YOR053W	0.21453			YAL013W	4.51803		YAL036C	1110		YAL038W	9.02477
YAL061W	-0.491706		YLR169W	0.215691			YAL014C	4.47738		YAL037C-A	93		YAL039C	0.581024
YAL060W	0.553576		YPL222C-A	0.215782			YAL015C	7.34838		YAL037W	804		YAL040C	0.418283
YAL059W	0.773944		YBR221W-A	0.216199			YAL016C-A	5.85623		YAL038W	1503		YAL041W	0.512215
YAL058W	-0.436386		YNL097W-A	0.217751			YAL016C-B	#DIV/0!		YAL039C	810		YAL042W	0.950173
YAL056W	-1.42426		YER152W-A	0.21825			YAL016W	4.48274		YAL040C	1743		YAL043C	0.53912
YAL055W	0.632474		YER158W-A	0.218958			YAL017W	4.10548		YAL041W	2565		YAL044C	1.19912
YAL053W	-0.00508518		YDL247W-A	0.219429			YAL018C	#DIV/0!		YAL042W	1248		YAL044W-A	0.432666
YAL051W	-0.495213		YAR068W	0.220053			YAL019W	3.05032		YAL043C	2358		YAL046C	0.354613
YAL044W-A	0.568054		YHR214W-A	0.222278			YAL019W-A	6.02229		YAL044C	513		YAL047C	0.222387
YAL042W	0.276311		YOR050C	0.223129			YAL020C	8.95596		YAL044W-A	333		YAL048C	0.36394
YAL041W	-0.383666		YDR136C	0.223718			YAL021C	4.12127		YAL046C	357		YAL049C	0.752773
YAL038W	0.539537		YKL106C-A	0.224298			YAL022C	4.58197		YAL047C	1869		YAL051W	0.43895
YAL037W	-1.21311		YLR112W	0.2246			YAL023C	5.54674		YAL047W-A	330		YAL053W	1.36759
YAL035W	0.247764		YHR032W-A	0.225438			YAL024C	1.86		YAL049C	741		YAL054C	6.60077
YAL034W-A	0.53954		YNL277W-A	0.225881			YAL025C	2.37021		YAL051W	3144		YAL055W	0.227088
YAL033W	0.525936		YOR024W	0.227191			YAL026C	3.94627		YAL053W	2352		YAL056W	0.544984
YAL030W	0.290773		YPL152W-A	0.227217			YAL026C-A	5.0581		YAL054C	2142		YAL058W	0.315198
YAL028W	-1.27551		YNL296W	0.228214			YAL027W	2.53748		YAL055W	543		YAL059W	0.332079
YAL027W	0.0215148		YPR146C	0.228228			YAL028W	#DIV/0!		YAL056W	2643		YAL060W	1.32538
YAL019W	-0.374779		YGL149W	0.2287			YAL029C	2.92373		YAL058W	1509		YAL061W	1.11439
YAL017W	-0.948294		YFR052C-A	0.228779			YAL030W	10.0077		YAL059W	639		YAL062W	0.610102
YAL016W	0.476196		YOR282W	0.229506			YAL031C	2.68369		YAL060W	1149		YAL068C	0.0381315
YAL013W	0.543516		YAL067W-A	0.229564			YAL031W-A	2.53104		YAL061W	1254		YAR002C-A	0.995621
YAL012W	1.19624		YDR482C	0.229975			YAL032C	2.89436		YAL062W	1374		YAR002W	0.475552
YAL011W	-0.594103		YPL261C	0.231424			YAL033W	5.9695		YAL063C	3969		YAR003W	0.337743
YAL009W	-0.810244		YML047W-A	0.231596			YAL034C	1.54082		YAL063C-A	291		YAR007C	0.824705
YAL008W	1.41872		YJL220W	0.23186			YAL034C-B	#DIV/0!		YAL064W-B	381		YAR008W	0.268962
YAL004W	-5.19344		YIL171W-A	0.23186			YAL034W-A	2.29595		YAL066W	309		YAR014C	0.622459
YAL003W	0.94479		YLR230W	0.232517			YAL035W	8.74843		YAL067C	1782		YAR015W	1.62435
YAL002W	-1.54166		YLR120W-A	0.232529			YAL036C	5.44046		YAR002C-A	660		YAR018C	0.249214
YAR002W	0.282246		YLR311C	0.232547			YAL037C-A	#DIV/0!		YAR002W	1620		YAR019C	0.249375
YAR003W	-0.956559		YER181C	0.232691			YAL037C-B	25.9858		YAR003W	1281		YAR023C	0.107736
YAR008W	0.0692209		YBR091C	0.232876			YAL037W	1.70797		YAR007C	1866		YAR027W	0.613499
YAR015W	0.643731		YMR013W-A	0.233058			YAL038W	26.2374		YAR008W	828		YAR028W	0.0871803
YAR019W-A	-2.38225		YJL022W	0.233062			YAL039C	7.22954		YAR014C	2130		YAR029W	0.0185221
YAR027W	0.602929		YOR394C-A	0.233151			YAL040C	1.0948		YAR015W	921		YAR033W	0.119229
YAR028W	0.745609		YLR235C	0.234253			YAL041W	2.05674		YAR018C	1308		YAR042W	0.549741
YAR029W	-4.29757		YOR029W	0.235261			YAL042C-A	#DIV/0!		YAR019C	2925		YBL001C	1.29821
YAR031W	0.231282		YGR107W	0.235486			YAL042W	7.66996		YAR019W-A	333		YBL002W	1.95144
YAR033W	0.733744		YDR360W	0.236083			YAL043C	2.61487		YAR023C	540		YBL003C	1.313
YAR035W	-1.32848		YGL074C	0.236156			YAL044C	11.1032		YAR027W	708		YBL004W	0.498062
YAR042W	-0.791842		YNL179C	0.236352			YAL044W-A	9.71835		YAR028W	705		YBL005W	0.343496
YAR050W	-3.77786		YGL193C	0.236855			YAL045C	#DIV/0!		YAR029W	225		YBL006C	0.393883
YAR071W	0.774631		YNL226W	0.23688			YAL046C	6.40435		YAR031W	897		YBL007C	1.15779
YBL113C	-3.76559		YPR064W	0.236987			YAL047C	2.65793		YAR033W	705		YBL008W	0.372948
YBL107C	-0.0543798		YBL100C	0.237344			YAL047W-A	#DIV/0!		YAR035W	2064		YBL009W	0.45869
YBL106C	-1.80632		YER078W-A	0.237357			YAL048C	1.80959		YAR042W	3567		YBL010C	0.229252
YBL105C	-1.13077		YOL110W	0.237534			YAL049C	9.57422		YAR047C	321		YBL011W	0.631219
YBL104C	-0.986446		YHL050W-A	0.238035			YAL051W	1.7903		YAR050W	4614		YBL013W	0.081002
YBL103C	-0.297245		YGL072C	0.238137			YAL053W	2.96072		YAR053W	297		YBL014C	0.290913
YBL101C	-1.01075		YCR097W-A	0.23826			YAL054C	7.15778		YAR071W	1404		YBL015W	2.34503
YBL093C	0.562184		YGR151C	0.238403			YAL055W	2.39348		YBL001C	315		YBL016W	0.499456
YBL091C-A	0.139061		YDR545C-A	0.238605			YAL056C-A	#DIV/0!		YBL002W	396		YBL017C	0.720475
YBL091C	0.402968		YOR161C-C	0.238936			YAL056W	2.68117		YBL003C	399		YBL018C	0.33251
YBL088C	-3.09734		YMR103C	0.238964			YAL058W	5.17312		YBL004W	7482		YBL019W	0.329542
YBL087C	1.09984		YKR012C	0.239124			YAL059C-A	3.52811		YBL005W	2931		YBL020W	0.475233
YBL086C	0.183456		YFL068W	0.23935			YAL059W	3.27166		YBL006C	543		YBL021C	0.286587
YBL084C	-0.702228		YLL066W-A	0.23935			YAL060W	7.50589		YBL007C	3735		YBL022C	1.35808
YBL080C	-0.310664		YLL067W-A	0.23935			YAL061W	5.04596		YBL008W	2523		YBL023C	0.414414
YBL078C	0.731565		YLR198C	0.239605			YAL062W	4.24994		YBL009W	2031		YBL024W	0.681497
YBL076C	-0.22678		YJL127W-A	0.239755			YAL063C-A	3.95605		YBL010C	843		YBL025W	0.192695
YBL075C	-4.14978		YLR467C-A	0.240032			YAL064C-A	#DIV/0!		YBL011W	2280		YBL026W	0.550248
YBL074C	-0.403623		YOR396C-A	0.240032			YAL064W	#DIV/0!		YBL014C	2685		YBL028C	0.350229
YBL072C	0.561525		YLR466C-A	0.240032			YAL064W-B	1.68325		YBL015W	1581		YBL029C-A	0.609748
YBL070C	-2.16974		YER079C-A	0.241053			YAL065C	6.50731		YBL016W	1062		YBL029W	0.361133
YBL067C	-1.60026		YDR095C	0.241087			YAL066W	#DIV/0!		YBL017C	4740		YBL030C	4.6403
YBL066C	-1.73054		YML009C-A	0.241186			YAL067C	6.82394		YBL018C	477		YBL031W	0.159883
YBL064C	0.824285		YOR199W	0.241262			YAL067W-A	#DIV/0!		YBL019W	1563		YBL032W	0.510416
YBL061C	-0.180008		YOR379C	0.241286			YAL068C	2.64571		YBL020W	1725		YBL033C	0.96723
YBL059C-A	0.703379		YDL068W	0.24139			YAL068W-A	#DIV/0!		YBL021C	435		YBL034C	0.341901
YBL057C	0.408012		YER133W-A	0.241929			YAL069W	#DIV/0!		YBL022C	3402		YBL035C	0.366512
YBL055C	0.0804696		YEL077W-A	0.242196			YAR002C-A	10.5566		YBL023C	2607		YBL036C	0.527983
YBL052C	-2.65694		YLR154C-G	0.242392			YAR002W	3.30803		YBL024W	2055		YBL037W	0.410521
YBL051C	-0.207513		YGR137W	0.242601			YAR003W	2.9613		YBL025W	438		YBL038W	0.670036
YBL047C	0.0525769		YML133W-B	0.242841			YAR007C	5.17833		YBL026W	416		YBL039C	0.746473
YBL045C	0.535316		YNL339W-B	0.242841			YAR008W	3.23158		YBL027W	954		YBL039W-B	0.258684
YBL042C	0.3631		YHR219C-A	0.242841			YAR014C	3.47728		YBL028C	321		YBL040C	0.676521
YBL040C	0.63727		YGL260W	0.243183			YAR015W	7.81227		YBL029C-A	285		YBL041W	1.21864
YBL039C	0.510428		YHL006C	0.243393			YAR018C	2.81087		YBL029W	1131		YBL042C	0.812634
YBL036C	0.421383		YPR204C-A	0.243533			YAR019C	2.67241		YBL030C	957		YBL043W	0.581576
YBL035C	0.161328		YGR296C-B	0.243533			YAR019W-A	#DIV/0!		YBL031W	1017		YBL045C	3.58473
YBL034C	-0.722573		YER190C-B	0.243533			YAR020C	#DIV/0!		YBL032W	1146		YBL046W	0.364005
YBL033C	1.29059		YPL283W-B	0.243533			YAR023C	5.39118		YBL033C	1038		YBL047C	1.22385
YBL030C	0.843539		YBR126W-B	0.243564			YAR027W	4.90809		YBL034C	4542		YBL049W	0.780288
YBL029C-A	1.34707		YJL225W-A	0.243579			YAR028W	5.48964		YBL035C	2118		YBL050W	0.882113
YBL028C	0.772792		YIL177W-A	0.243579			YAR029W	#DIV/0!		YBL036C	774		YBL051C	0.534511
YBL023C	0.200962		YMR194C-B	0.243587			YAR030C	#DIV/0!		YBL037W	3078		YBL052C	0.403438
YBL022C	0.0273795		YER090C-A	0.243736			YAR031W	5.30717		YBL038W	699		YBL054W	0.465218
YBL021C	0.314245		YHR189W	0.24381			YAR033W	5.94838		YBL039C	1740		YBL055C	0.337235
YBL018C	0.561128		YBL113W-A	0.243923			YAR035C-A	#DIV/0!		YBL039W-B	180		YBL056W	1.05149
YBL017C	-0.463032		YKL083W	0.244358			YAR035W	11.7666		YBL040C	757		YBL057C	0.390164
YBL014C	-1.99634		YER153C	0.244528			YAR042W	1.82619		YBL041W	726		YBL058W	1.33064
YBL010C	0.332541		YEL059W	0.24453			YAR053W	3.48342		YBL042C	1920		YBL059C-A	0.43384
YBL007C	-0.350307		YHL005C	0.244707			YAR068W	7.16281		YBL043W	774		YBL059W	0.26223
YBL006C	0.364846		YPR145C-A	0.244715			YBL001C	11.4151		YBL045C	1374		YBL060W	0.354798
YBL003C	0.840768		YBL012C	0.245003			YBL002W	3.91726		YBL046W	1326		YBL061C	0.435583
YBL001C	1.16909		YER067C-A	0.245166			YBL003C	6.47395		YBL047C	4146		YBL063W	0.27903
YBR001C	-0.196064		YGR293C	0.245358			YBL004W	3.23568		YBL048W	312		YBL064C	1.79072
YBR002C	0.0423765		YDR024W	0.245385			YBL005W	1.89563		YBL050W	995		YBL066C	0.485749
YBR004C	-0.081265		YEL045C	0.245525			YBL005W-A	#DIV/0!		YBL051C	2007		YBL067C	0.769435
YBR007C	-0.492044		YJR038C	0.245541			YBL006C	5.54151		YBL052C	2496		YBL068W	0.338446
YBR008C	-2.65278		YLR317W	0.245613			YBL006W-A	#DIV/0!		YBL054W	1578		YBL069W	0.279
YBR009C	1.08945		YPL080C	0.245682			YBL007C	6.80204		YBL055C	1257		YBL071W-A	0.23326
YBR011C	1.08851		YJL156W-A	0.245683			YBL008W	2.54835		YBL056W	1407		YBL074C	0.155998
YBR014C	1.26738		YIL142C-A	0.245759			YBL008W-A	#DIV/0!		YBL057C	627		YBL075C	6.20514
YBR015C	0.374007		YMR013C-A	0.24616			YBL009W	2.73273		YBL058W	1272		YBL076C	1.86111
YBR017C	-0.0940683		YIL046W-A	0.246238			YBL010C	2.27821		YBL059C-A	415		YBL078C	0.591618
YBR018C	-2.42575		YLR281C	0.246239			YBL011W	4.03123		YBL059W	651		YBL079W	0.559607
YBR019C	-0.746742		YBR201C-A	0.246411			YBL012C	3.8736		YBL060W	2064		YBL080C	0.357376
YBR023C	-0.741795		YKR073C	0.246673			YBL013W	1.73811		YBL061C	2091		YBL081W	0.240827
YBR025C	0.506439		YJL150W	0.246756			YBL014C	1.85212		YBL063W	3336		YBL082C	0.383483
YBR026C	0.696773		YMR057C	0.246816			YBL015W	6.67677		YBL064C	786		YBL084C	0.424426
YBR028C	-0.338891		YBL008W-A	0.247561			YBL016W	3.40313		YBL066C	3447		YBL085W	0.559962
YBR029C	0.336829		YMR306C-A	0.247627			YBL017C	5.0545		YBL067C	2244		YBL086C	0.363749
YBR034C	0.668712		YLR280C	0.247737			YBL018C	5.80924		YBL068W	981		YBL088C	0.391047
YBR035C	0.963155		YDR246W-A	0.247941			YBL019W	3.15669		YBL070C	321		YBL089W	0.297015
YBR036C	0.222821		YHR199C-A	0.248419			YBL020W	2.81996		YBL071C	309		YBL090W	0.552678
YBR037C	0.894756		YHR056W-A	0.24912			YBL021C	3.37045		YBL071W-A	249		YBL091C	0.820026
YBR042C	0.0807909		YGR069W	0.249478			YBL022C	6.36639		YBL072C	603		YBL091C-A	0.227301
YBR043C	-2.05969		YNR042W	0.24964			YBL023C	3.06864		YBL074C	1068		YBL092W	3.85245
YBR044C	-0.455196		YDR491C	0.249655			YBL024W	3.90983		YBL075C	1950		YBL093C	0.516164
YBR045C	-0.812123		YJL077C	0.249965			YBL025W	3.09414		YBL076C	3219		YBL095W	0.38288
YBR046C	1.04392		YNL144W-A	0.250085			YBL026W	7.07719		YBL078C	354		YBL097W	0.11534
YBR049C	-0.0510651		YBR300C	0.250476			YBL027W	17.5206		YBL079W	4509		YBL098W	0.583252
YBR050C	-0.571874		YKL111C	0.250548			YBL028C	1.9434		YBL080C	1626		YBL099W	5.48744
YBR052C	0.688819		YLR444C	0.250558			YBL029C-A	3.56246		YBL081W	1107		YBL101C	0.85535
YBR053C	0.873437		YFL012W-A	0.250615			YBL029W	#DIV/0!		YBL084C	2277		YBL102W	0.738223
YBR055C	-0.746279		YDR048C	0.251202			YBL030C	11.2527		YBL085W	2943		YBL103C	0.462814
YBR057C	0.187388		YPL102C	0.251372			YBL031W	1.37851		YBL086C	1401		YBL104C	0.335559
YBR058C	0.114841		YIL032C	0.251434			YBL032W	6.42262		YBL087C	918		YBL105C	0.697832
YBR058C-A	0.834477		YKL053W	0.251554			YBL033C	4.50353		YBL088C	8364		YBL106C	0.413968
YBR059C	-0.585424		YDL159W-A	0.251579			YBL034C	2.58259		YBL089W	1380		YBL107C	0.473776
YBR060C	-0.543384		YFL015W-A	0.251684			YBL035C	2.62555		YBL090W	534		YBR001C	0.5559
YBR061C	0.807279		YIL071W-A	0.2522			YBL036C	7.31211		YBL091C	1266		YBR002C	0.325375
YBR062C	1.10623		YLR437C-A	0.252202			YBL037W	2.02553		YBL091C-A	616		YBR003W	0.490669
YBR063C	-6.00029		YDR431W	0.252249			YBL038W	4.35695		YBL092W	393		YBR004C	0.347864
YBR065C	-0.169784		YGR064W	0.252441			YBL039C	4.65072		YBL093C	663		YBR005W	0.504997
YBR066C	0.316369		YHR180W-A	0.252631			YBL039C-A	#DIV/0!		YBL095W	813		YBR006W	0.666773
YBR067C	1.27025		YDR467C	0.253028			YBL039W-B	2.93215		YBL097W	2265		YBR007C	0.27579
YBR068C	-0.21482		YBL006C	0.253107			YBL040C	5.24202		YBL098W	1383		YBR008C	0.685594
YBR069C	-0.254171		YDR320C-A	0.253146			YBL041W	5.86151		YBL099W	1638		YBR011C	3.87326
YBR070C	0.0564411		YML094C-A	0.253171			YBL042C	1.63225		YBL100W-C	120		YBR014C	0.487838
YBR076C-A	-3.73761		YOR316C-A	0.253333			YBL043W	#DIV/0!		YBL101C	3354		YBR015C	1.1476
YBR077C	0.120338		YFL031C-A	0.253341			YBL044W	#DIV/0!		YBL102W	648		YBR016W	0.771349
YBR079C	0.139857		YDL062W	0.253559			YBL045C	5.93374		YBL103C	1461		YBR017C	0.554475
YBR080C	0.216986		YEL067C	0.253611			YBL046W	2.33264		YBL104C	3117		YBR018C	0.074482
YBR081C	-0.777037		YPR074W-A	0.253667			YBL047C	6.30276		YBL105C	3456		YBR019C	0.214351
YBR082C	1.1475		YJR120W	0.2537			YBL048W	#DIV/0!		YBL106C	3033		YBR020W	0.12883
YBR084C-A	0.833821		YGR050C	0.253722			YBL049W	6.56364		YBL107C	591		YBR021W	0.386205
YBR085C-A	0.533404		YLL044W	0.253864			YBL050W	7.16654		YBL113C	2379		YBR022W	0.357894
YBR086C	-0.660305		YOL085C	0.254112			YBL051C	3.98469		YBR001C	2343		YBR023C	0.839744
YBR088C	0.982453		YPR159C-A	0.254171			YBL052C	3.32698		YBR002C	861		YBR024W	0.392016
YBR089C-A	0.970577		YGR062C	0.254333			YBL053W	2.60941		YBR003W	1422		YBR025C	2.2523
YBR091C	0.637799		YJL047C-A	0.254598			YBL054W	1.67073		YBR004C	1302		YBR026C	1.25543
YBR092C	0.655978		YEL010W	0.254673			YBL055C	4.18995		YBR005W	642		YBR028C	0.416528
YBR093C	0.782874		YKL066W	0.254974			YBL056W	5.81375		YBR006W	1494		YBR029C	1.12314
YBR095C	0.22045		YGL063W	0.255247			YBL057C	6.44891		YBR007C	2211		YBR030W	0.282865
YBR099C	-3.8012		YAL069W	0.255341			YBL058W	5.45288		YBR008C	1647		YBR033W	0.346644
YBR101C	0.709384		YOR314W-A	0.255479			YBL059C-A	5.2274		YBR009C	312		YBR034C	0.631673
YBR102C	-0.0960233		YKL037W	0.255681			YBL059W	3.60301		YBR010W	411		YBR035C	0.957239
YBR105C	-0.0687503		YIL047C-A	0.255892			YBL060W	1.81711		YBR011C	864		YBR036C	1.25154
YBR107C	-1.15152		YER084W	0.256163			YBL061C	2.75233		YBR012C	420		YBR037C	0.452175
YBR109C	1.00114		YGL007W	0.256193			YBL062W	2.93664		YBR013C	390		YBR038W	0.56341
YBR111C	1.01479		YDR278C	0.256395			YBL063W	2.51556		YBR014C	612		YBR039W	2.53095
YBR112C	0.198589		YDL187C	0.256626			YBL064C	#DIV/0!		YBR015C	1794		YBR040W	0.0251485
YBR115C	-0.0606408		YOR293C-A	0.256685			YBL065W	#DIV/0!		YBR016W	387		YBR041W	0.45843
YBR120C	1.34517		YOR072W	0.256811			YBL066C	1.74951		YBR017C	2757		YBR042C	0.31012
YBR121C	0.452218		YGR242W	0.257252			YBL067C	3.11042		YBR018C	1101		YBR043C	0.736141
YBR122C	0.271382		YEL050W-A	0.25729			YBL068W	5.62219		YBR019C	2100		YBR044C	0.467967
YBR123C	-0.101585		YKR032W	0.257393			YBL068W-A	#DIV/0!		YBR020W	1587		YBR045C	0.243663
YBR125C	-0.275249		YHR105W	0.257418			YBL069W	3.3085		YBR021W	1902		YBR046C	1.18612
YBR126C	0.805705		YPL114W	0.257632			YBL070C	3.82216		YBR022W	534		YBR047W	0.383228
YBR127C	0.465481		YJL222W-A	0.257891			YBL071C	2.52176		YBR023C	3498		YBR048W	2.68642
YBR128C	-0.946577		YAL026C-A	0.257901			YBL071C-B	#DIV/0!		YBR024W	906		YBR049C	0.734762
YBR129C	-0.314131		YMR247W-A	0.258125			YBL071W-A	2.85741		YBR025C	1185		YBR050C	0.411494
YBR130C	-0.277576		YGL034C	0.258232			YBL072C	18.1241		YBR026C	1143		YBR052C	0.65068
YBR132C	-0.585096		YHL006W-A	0.258283			YBL073W	#DIV/0!		YBR028C	1578		YBR053C	0.828044
YBR133C	-1.24816		YEL018C-A	0.258336			YBL074C	1.06273		YBR029C	1374		YBR054W	4.40084
YBR138C	0.0748677		YCR006C	0.25837			YBL075C	7.9818		YBR030W	1659		YBR055C	0.371956
YBR140C	-2.27469		YJL020W-A	0.258382			YBL076C	9.69625		YBR031W	1089		YBR056W	1.11878
YBR141C	0.185891		YNL138W-A	0.258777			YBL077W	10.7474		YBR033W	2760		YBR057C	0.624762
YBR143C	0.393963		YJL142C	0.259046			YBL078C	#DIV/0!		YBR034C	1047		YBR059C	0.680404
YBR150C	-0.507121		YCR038W-A	0.259092			YBL079W	3.44718		YBR035C	687		YBR060C	0.374883
YBR154C	1.09187		YDR230W	0.259292			YBL080C	2.78369		YBR036C	1233		YBR061C	0.337437
YBR156C	-0.500158		YER087C-A	0.259318			YBL081W	1.57862		YBR037C	888		YBR062C	0.653023
YBR157C	0.0347769		YBR032W	0.259321			YBL082C	6.93649		YBR038W	2892		YBR063C	0.259739
YBR162C	0.343001		YKL097C	0.259533			YBL083C	5.48441		YBR039W	936		YBR065C	0.189556
YBR164C	0.785936		YML089C	0.259654			YBL084C	1.62322		YBR041W	2010		YBR066C	1.14053
YBR166C	0.516715		YOR011W-A	0.259874			YBL085W	2.6496		YBR042C	1194		YBR067C	7.21481
YBR167C	0.614949		YJL211C	0.259909			YBL086C	3.2295		YBR043C	2070		YBR068C	0.908433
YBR169C	0.133022		YCR025C	0.259965			YBL087C	20.0803		YBR044C	1719		YBR069C	0.142425
YBR170C	0.60439		YML084W	0.260191			YBL088C	2.50369		YBR045C	1920		YBR070C	0.391493
YBR172C	-0.0740289		YPR108W-A	0.260227			YBL089W	1.3553		YBR046C	1005		YBR071W	0.955556
YBR173C	1.001		YKL223W	0.260295			YBL090W	5.13049		YBR047W	528		YBR072W	26.2879
YBR177C	0.748933		YIL068W-A	0.260307			YBL091C	11.3498		YBR048W	982		YBR073W	0.62524
YBR179C	-0.364554		YFR056C	0.260377			YBL091C-A	10.1427		YBR049C	2433		YBR074W	0.462205
YBR181C	0.798796		YGR182C	0.260715			YBL092W	20.8683		YBR050C	1017		YBR076W	0.136498
YBR182C	-0.376404		YGR164W	0.260941			YBL093C	3.10193		YBR051W	351		YBR077C	0.541003
YBR185C	0.660544		YFR035C	0.261054			YBL094C	#DIV/0!		YBR052C	633		YBR078W	4.19678
YBR188C	0.419448		YNL184C	0.261118			YBL095W	2.36357		YBR053C	1077		YBR079C	1.43875
YBR193C	0.531764		YLR154W-F	0.261121			YBL096C	2.8469		YBR054W	1035		YBR080C	0.679368
YBR195C	0.317313		YHR073W-A	0.261158			YBL097W	1.37193		YBR055C	2700		YBR081C	0.534632
YBR196C	0.751311		YDL026W	0.261214			YBL098W	8.02933		YBR056W	1506		YBR082C	1.12377
YBR197C	-0.850886		YHR175W-A	0.261313			YBL099W	9.44912		YBR056W-A	201		YBR083W	0.761052
YBR198C	0.00996936		YEL035C	0.261507			YBL100C	8.30704		YBR057C	1101		YBR084C-A	3.82425
YBR201C-A	-0.0923335		YIL141W	0.261581			YBL100W-C	#DIV/0!		YBR058C	2346		YBR084W	0.661138
YBR204C	-0.170046		YOL001W	0.261644			YBL101C	2.13672		YBR058C-A	243		YBR085C-A	2.42795
YBR208C	-0.810355		YIR014W	0.261697			YBL102W	6.71688		YBR059C	3327		YBR085W	0.0231687
YBR211C	0.249038		YHR131W-A	0.261932			YBL103C	2.14589		YBR060C	1863		YBR086C	1.19179
YBR216C	-1.02864		YIL122W	0.262355			YBL104C	2.24956		YBR061C	933		YBR087W	0.370308
YBR218C	-0.284611		YLR154W-A	0.262641			YBL105C	2.8655		YBR062C	625		YBR088C	0.848606
YBR221C	0.262667		YEL008C-A	0.262682			YBL106C	1.88105		YBR063C	1215		YBR089C-A	1.2385
YBR222C	0.24186		YJL118W	0.262726			YBL107C	4.76019		YBR065C	1095		YBR091C	0.184933
YBR223C	-0.738333		YPL035C	0.262784			YBL107W-A	#DIV/0!		YBR066C	663		YBR092C	0.224313
YBR229C	-0.0854877		YGL052W	0.262844			YBL108C-A	3.02881		YBR067C	633		YBR094W	0.549206
YBR230C	1.24565		YKL225W	0.262903			YBL108W	1.4762		YBR068C	1830		YBR095C	0.355085
YBR231C	0.551757		YDR442W	0.263029			YBL109W	5.21871		YBR069C	1860		YBR096W	0.479722
YBR234C	0.590627		YOR146W	0.263102			YBR001C	3.05517		YBR070C	714		YBR097W	0.294088
YBR236C	0.355737		YGL226W	0.263297			YBR002C	1.9927		YBR071W	636		YBR098W	0.456251
YBR238C	-0.468334		YMR304C-A	0.263348			YBR003W	5.0196		YBR072C-A	162		YBR101C	1.51249
YBR239C	-0.856002		YOR183W	0.263377			YBR004C	2.51526		YBR072W	645		YBR102C	0.40345
YBR240C	-0.507594		YIL113W	0.263423			YBR005W	3.24368		YBR073W	2877		YBR103W	0.43154
YBR241C	0.353583		YMR230W-A	0.263601			YBR006W	9.33656		YBR074W	2931		YBR104W	0.326523
YBR243C	-0.0631477		YLR315W	0.26404			YBR007C	1.79459		YBR076C-A	267		YBR105C	0.462196
YBR245C	0.0341309		YLR458W	0.264103			YBR008C	6.00847		YBR076W	1065		YBR106W	1.89567
YBR247C	0.665832		YNL103W-A	0.264257			YBR009C	3.09382		YBR077C	489		YBR107C	0.235196
YBR248C	0.617555		YKR045C	0.264289			YBR010W	2.83754		YBR078W	1620		YBR108W	0.420813
YBR249C	0.9405		YFR057W	0.264308			YBR011C	33.6505		YBR079C	2895		YBR109C	1.48374
YBR254C	0.554039		YCR041W	0.264485			YBR014C	6.16776		YBR080C	2277		YBR110W	0.613853
YBR255C-A	0.196171		YPR087W	0.264498			YBR015C	5.73483		YBR081C	3999		YBR111C	0.946651
YBR256C	0.165898		YDR535C	0.264664			YBR016W	8.52842		YBR082C	542		YBR111W-A	0.437988
YBR258C	0.668156		YGR068W-A	0.264696			YBR017C	4.29924		YBR083W	1461		YBR112C	0.746809
YBR260C	0.281046		YLR366W	0.264715			YBR018C	#DIV/0!		YBR084C-A	1076		YBR114W	0.25471
YBR261C	0.83964		YLL038C	0.264786			YBR019C	4.63625		YBR084W	2928		YBR115C	1.57395
YBR262C	0.354683		YOL166C	0.264861			YBR020W	#DIV/0!		YBR085C-A	258		YBR117C	1.93561
YBR264C	0.488789		YCL041C	0.265024			YBR021W	1.55022		YBR085W	924		YBR119W	0.489714
YBR269C	0.74786		YDR241W	0.265043			YBR022W	5.01075		YBR086C	2841		YBR120C	0.460014
YBR270C	-1.83665		YDR029W	0.265055			YBR023C	2.50963		YBR087W	1065		YBR121C	1.84082
YBR272C	-0.0337906		YFR018C	0.265095			YBR024W	5.87648		YBR088C	777		YBR122C	0.675162
YBR273C	0.638516		YGR146C-A	0.265108			YBR025C	15.1912		YBR089C-A	300		YBR123C	0.216446
YBR275C	-1.32829		YNL235C	0.265323			YBR026C	9.88929		YBR091C	330		YBR125C	0.413978
YBR276C	-2.42198		YML099W-A	0.265717			YBR027C	#DIV/0!		YBR092C	1404		YBR126C	2.26074
YBR280C	-0.0174785		YDR464C-A	0.26586			YBR028C	3.2843		YBR093C	1404		YBR127C	2.08794
YBR281C	-0.397335		YHR157W	0.265895			YBR029C	2.23488		YBR094W	2262		YBR128C	0.223142
YBR283C	0.375757		YMR254C	0.265898			YBR030W	2.60922		YBR095C	1293		YBR129C	0.42048
YBR288C	0.252487		YDR274C	0.265958			YBR031W	9.56368		YBR096W	693		YBR130C	0.343537
YBR291C	0.470644		YIR040C	0.266014			YBR032W	#DIV/0!		YBR097W	4365		YBR131W	0.184344
YBR292C	-2.70911		YFL052W	0.266274			YBR033W	3.43184		YBR098W	2076		YBR132C	0.393787
YBR296C	0.373562		YNR025C	0.266296			YBR034C	2.57485		YBR099C	384		YBR133C	0.497523
YBR298C	-4.80187		YIR009W	0.266434			YBR035C	12.0528		YBR101C	873		YBR135W	0.394966
YBL102W	-0.168478		YNL114C	0.266449			YBR036C	3.95175		YBR102C	2262		YBR136W	0.224781
YBL099W	0.554941		YNL205C	0.266739			YBR037C	5.5948		YBR103C-A	144		YBR137W	0.527884
YBL098W	0.454205		YPR142C	0.26678			YBR038W	2.35459		YBR103W	1608		YBR138C	0.266458
YBL097W	-0.699348		YLR157C-C	0.266866			YBR039W	7.90175		YBR104W	990		YBR139W	0.927453
YBL095W	-0.793631		YLR156C-A	0.266866			YBR040W	#DIV/0!		YBR105C	1089		YBR140C	0.615613
YBL092W	0.907976		YLR154C-H	0.266866			YBR041W	3.64677		YBR106W	567		YBR141C	0.188135
YBL090W	0.943292		YLR159C-A	0.266866			YBR042C	3.04164		YBR107C	738		YBR142W	0.391378
YBL089W	-0.131879		YDR199W	0.266901			YBR043C	2.72761		YBR108W	2844		YBR143C	1.53529
YBL085W	-0.637704		YDR114C	0.266978			YBR044C	3.14101		YBR109C	444		YBR145W	0.563063
YBL081W	-0.133513		YOR082C	0.267065			YBR045C	3.89152		YBR110W	1350		YBR146W	0.842069
YBL079W	-1.23241		YAL066W	0.267176			YBR046C	5.58901		YBR111C	696		YBR147W	0.747068
YBL071W-A	0.410834		YBR141W-A	0.267178			YBR047W	#DIV/0!		YBR111W-A	441		YBR148W	0.0551073
YBL068W	0.18842		YJR151W-A	0.267656			YBR048W	20.6929		YBR112C	2901		YBR149W	2.39934
YBL063W	-0.988289		YJL182C	0.267762			YBR049C	2.84103		YBR114W	2373		YBR150C	0.426395
YBL060W	-0.572956		YBR012C	0.268005			YBR050C	#DIV/0!		YBR115C	4179		YBR151W	0.733516
YBL059W	0.12208		YPR044C	0.268008			YBR051W	#DIV/0!		YBR118W	1377		YBR152W	0.155594
YBL058W	0.491859		YCL042W	0.268102			YBR052C	18.5348		YBR119W	986		YBR153W	0.271108
YBL056W	-0.228795		YJR146W	0.26816			YBR053C	8.87888		YBR120C	489		YBR154C	0.671825
YBL054W	-0.0820302		YDR355C	0.268416			YBR054W	6.69982		YBR121C	2004		YBR155W	0.39108
YBL050W	1.13963		YJR115W	0.268657			YBR055C	2.86404		YBR122C	534		YBR156C	0.108808
YBL048W	-1.4426		YJL120W	0.26882			YBR056C-B	#DIV/0!		YBR123C	1950		YBR157C	1.65705
YBL046W	0.467901		YGL165C	0.268835			YBR056W	7.4741		YBR125C	1182		YBR158W	1.1133
YBL043W	-0.147129		YCL065W	0.268884			YBR056W-A	#DIV/0!		YBR126C	1488		YBR159W	0.815866
YBL041W	0.871938		YLR202C	0.268946			YBR057C	1.97281		YBR127C	1554		YBR160W	0.548504
YBL039W-B	-0.988856		YIL030W-A	0.268966			YBR058C	4.1888		YBR128C	1035		YBR161W	0.227832
YBL038W	0.751453		YDL071C	0.268993			YBR058C-A	4.48869		YBR129C	987		YBR162C	2.69724
YBL037W	-0.222556		YER091C-A	0.269107			YBR059C	3.57917		YBR130C	1278		YBR162W-A	0.530614
YBL032W	0.507838		YNL171C	0.269157			YBR060C	2.37122		YBR131W	2115		YBR163W	0.340453
YBL031W	-0.410225		YML034C-A	0.269274			YBR061C	3.7309		YBR132C	1791		YBR164C	0.475483
YBL029W	0.532966		YLL042C	0.269393			YBR062C	7.24764		YBR133C	2484		YBR165W	0.300817
YBL027W	0.833065		YBL044W	0.269484			YBR063C	1.88737		YBR135W	453		YBR166C	0.532544
YBL026W	0.952253		YLR466C-B	0.269503			YBR064W	2.51362		YBR136W	7107		YBR167C	0.284118
YBL025W	0.936236		YOL079W	0.269734			YBR065C	2.15249		YBR137W	540		YBR168W	0.36013
YBL024W	0.494192		YPR170W-A	0.269785			YBR066C	3.52905		YBR138C	1575		YBR169C	2.60451
YBL020W	-0.126117		YGR045C	0.26984			YBR067C	10.6384		YBR139W	1527		YBR170C	0.67629
YBL019W	-0.46799		YHR095W	0.269905			YBR068C	1.30978		YBR140C	9279		YBR171W	0.583839
YBL016W	0.586183		YBL070C	0.269942			YBR069C	2.54428		YBR141C	1014		YBR172C	0.595444
YBL015W	0.58781		YJL052C-A	0.270099			YBR070C	4.95244		YBR141W-A	96		YBR173C	1.02429
YBL011W	-0.824608		YLR140W	0.270418			YBR071W	2.47543		YBR142W	2322		YBR175W	0.222138
YBL009W	-0.126488		YAR047C	0.270553			YBR072C-A	#DIV/0!		YBR143C	1314		YBR176W	0.314516
YBL008W	-0.728586		YJL027C	0.270671			YBR072W	#DIV/0!		YBR144C	315		YBR177C	1.33622
YBL005W	-1.24497		YGR051C	0.270691			YBR073W	3.39665		YBR145W	1056		YBR179C	0.66666
YBL004W	-1.11799		YER175W-A	0.270864			YBR074W	4.50787		YBR146W	837		YBR180W	0.078601
YBL002W	0.862236		YDR269C	0.270993			YBR076C-A	2.11388		YBR147W	891		YBR182C	0.122077
YBR003W	0.0530474		YKR095W-A	0.271136			YBR076W	7.15434		YBR148W	1830		YBR183W	0.322388
YBR005W	0.430579		YKL030W	0.271214			YBR077C	3.83619		YBR149W	1035		YBR184W	0.135074
YBR006W	0.1613		YHR049C-A	0.271509			YBR078W	9.30219		YBR150C	3285		YBR185C	0.542915
YBR010W	1.0976		YBL073W	0.271551			YBR079C	6.15104		YBR151W	951		YBR186W	0.133642
YBR016W	1.50231		YIR016W	0.271604			YBR080C	6.25515		YBR152W	876		YBR187W	0.662294
YBR020W	-4.93513		YLR428C	0.27164			YBR081C	2.81093		YBR153W	735		YBR188C	0.257191
YBR021W	-0.267084		YNL285W	0.271656			YBR082C	12.7189		YBR154C	648		YBR189W	3.13815
YBR022W	0.413653		YAL059C-A	0.271861			YBR083W	1.62342		YBR155W	1158		YBR191W	2.39198
YBR024W	0.783413		YBL053W	0.27195			YBR084C-A	15.9501		YBR156C	2097		YBR192W	0.4026
YBR030W	-0.44378		YLL020C	0.272045			YBR084W	7.6101		YBR157C	768		YBR193C	0.312127
YBR031W	0.89036		YMR105W-A	0.272293			YBR085C-A	11.8388		YBR158W	1650		YBR194W	0.178462
YBR033W	-1.20112		YLR349W	0.272403			YBR085W	5.30175		YBR159W	1044		YBR195C	0.359404
YBR038W	-0.122425		YHR213W-B	0.272552			YBR086C	4.36498		YBR160W	897		YBR196C	3.63544
YBR039W	0.50915		YMR069W	0.272589			YBR087W	4.06431		YBR161W	1131		YBR197C	0.332495
YBR041W	0.0119949		YOL155W-A	0.272672			YBR088C	4.42802		YBR162C	1368		YBR198C	0.60752
YBR047W	0.480813		YNL013C	0.27273			YBR089C-A	8.41938		YBR162W-A	198		YBR199W	1.20489
YBR048W	0.652842		YLR406C-A	0.272777			YBR089W	4.42091		YBR163W	1758		YBR200W	0.49298
YBR054W	0.174245		YHR214C-E	0.272794			YBR091C	2.69894		YBR164C	552		YBR201C-A	0.124944
YBR056W	0.489993		YPL119C-A	0.272844			YBR092C	6.30821		YBR165W	834		YBR201W	0.251931
YBR056W-A	-0.210776		YGL146C	0.272907			YBR093C	9.37359		YBR166C	1359		YBR202W	0.713388
YBR071W	0.602827		YCL005W	0.272946			YBR094W	4.14317		YBR167C	423		YBR203W	0.442
YBR072W	1.02093		YCR001W	0.272955			YBR095C	1.5067		YBR168W	1242		YBR204C	0.483155
YBR073W	-0.350893		YIR017W-A	0.272961			YBR096W	4.88046		YBR169C	2082		YBR207W	0.952171
YBR074W	-0.352728		YMR138W	0.273069			YBR097W	2.93317		YBR170C	1743		YBR208C	0.556759
YBR076W	-0.740791		YBR027C	0.27308			YBR098W	2.96922		YBR171W	621		YBR210W	0.220277
YBR078W	0.468921		YIL152W	0.273307			YBR099C	6.76052		YBR172C	2223		YBR211C	0.247154
YBR083W	0.13427		YAR053W	0.273407			YBR101C	4.77168		YBR173C	447		YBR212W	1.5661
YBR084W	-0.214835		YBL108W	0.273633			YBR102C	3.18702		YBR174C	315		YBR213W	0.27822
YBR085W	0.880849		YAR064W	0.273729			YBR103C-A	#DIV/0!		YBR175W	948		YBR214W	1.51243
YBR087W	0.528876		YER028C	0.273758			YBR103W	2.63046		YBR176W	939		YBR215W	0.476867
YBR094W	0.0631316		YDR413C	0.273832			YBR104W	2.93342		YBR177C	1356		YBR216C	0.203237
YBR096W	0.716297		YKL147C	0.274178			YBR105C	1.5368		YBR178W	375		YBR217W	0.192769
YBR097W	-1.22805		YKL044W	0.274336			YBR106W	10.1319		YBR179C	2568		YBR218C	0.595692
YBR098W	-0.631687		YGR203W	0.274422			YBR107C	3.5568		YBR181C	1063		YBR220C	0.459107
YBR103W	0.179123		YNL203C	0.274672			YBR108W	4.39119		YBR182C	1359		YBR221C	2.34922
YBR104W	0.267476		YNL324W	0.274685			YBR109C	18.7666		YBR182C-A	195		YBR222C	1.60518
YBR106W	0.779581		YPR038W	0.274698			YBR109W-A	#DIV/0!		YBR183W	951		YBR223C	0.240022
YBR108W	-0.153963		YOR364W	0.274788			YBR110W	3.4763		YBR184W	1572		YBR225W	0.39924
YBR110W	-0.115657		YEL004W	0.274797			YBR111C	13.786		YBR185C	837		YBR227C	0.479345
YBR111W-A	0.881235		YHL034W-A	0.274807			YBR111W-A	3.67758		YBR186W	1808		YBR228W	0.274495
YBR114W	-0.581922		YOR345C	0.27484			YBR112C	2.26719		YBR187W	843		YBR229C	0.571734
YBR118W	0.809521		YOR329W-A	0.27486			YBR113W	2.56267		YBR188C	423		YBR230C	2.46664
YBR119W	0.332226		YGL063C-A	0.275237			YBR114W	1.99313		YBR189W	1001		YBR230W-A	0.177889
YBR131W	-0.57167		YGL168W	0.27538			YBR115C	4.94276		YBR192W	1134		YBR231C	0.431601
YBR135W	0.660133		YHR063W-A	0.275387			YBR116C	#DIV/0!		YBR193C	672		YBR233W	0.378041
YBR136W	-1.68811		YLR091W	0.275449			YBR117C	4.50206		YBR194W	372		YBR233W-A	0.234376
YBR137W	1.0753		YEL075W-A	0.275452			YBR118W	25.3467		YBR195C	1269		YBR234C	1.13606
YBR139W	0.600699		YER084W-A	0.275525			YBR119W	3.40888		YBR196C	1665		YBR235W	0.416662
YBR141W-A	-2.76855		YHR214C-D	0.275526			YBR120C	3.14808		YBR197C	654		YBR236C	0.482944
YBR142W	0.0239429		YAR069C	0.275526			YBR121C	11.4412		YBR198C	2397		YBR237W	0.450183
YBR145W	0.607551		YJR087W	0.275664			YBR121C-A	#DIV/0!		YBR199W	1395		YBR238C	0.143761
YBR146W	-0.116345		YLR302C	0.275888			YBR122C	5.79204		YBR200W	1656		YBR239C	0.172898
YBR147W	-0.0608775		YMR031W-A	0.275898			YBR123C	1.45371		YBR201C-A	204		YBR240C	0.177113
YBR148W	-0.630751		YJL067W	0.275938			YBR124W	#DIV/0!		YBR201W	636		YBR241C	1.07787
YBR149W	0.806985		YGL051W	0.275956			YBR125C	3.4676		YBR202W	2538		YBR242W	0.482672
YBR151W	-0.318364		YDL221W	0.276068			YBR126C	11.1582		YBR203W	2775		YBR243C	0.488125
YBR152W	0.0207494		YFR010W-A	0.27609			YBR126W-A	4.49651		YBR204C	1128		YBR244W	0.187309
YBR153W	-0.418588		YBL062W	0.276227			YBR126W-B	7.28821		YBR205W	1215		YBR245C	0.474258
YBR155W	0.594141		YBR178W	0.276684			YBR127C	20.5086		YBR207W	1398		YBR246W	0.340833
YBR158W	-0.592181		YMR194C-A	0.276851			YBR128C	5.58111		YBR208C	5508		YBR247C	0.474594
YBR159W	0.342773		YMR141C	0.276877			YBR129C	2.8718		YBR210W	429		YBR248C	1.03852
YBR160W	0.606039		YAR030C	0.276895			YBR130C	3.04064		YBR211C	975		YBR249C	2.30269
YBR161W	-0.116787		YAR070C	0.277089			YBR131C-A	#DIV/0!		YBR212W	2019		YBR250W	0.0856918
YBR162W-A	0.877198		YHR193C-A	0.277427			YBR131W	1.19032		YBR213W	825		YBR251W	0.480702
YBR163W	-1.90755		YEL076C	0.277608			YBR132C	3.58422		YBR214W	1584		YBR252W	0.367217
YBR165W	0.350378		YLR123C	0.277612			YBR133C	3.327		YBR215W	1962		YBR253W	0.256428
YBR168W	-1.22991		YBR226C	0.277692			YBR134W	#DIV/0!		YBR216C	2025		YBR254C	0.187744
YBR171W	0.771791		YOL083C-A	0.277823			YBR135W	4.59149		YBR217W	561		YBR255C-A	0.571084
YBR175W	-0.11053		YBL096C	0.277842			YBR136W	2.34989		YBR218C	3543		YBR255W	0.362057
YBR176W	0.670211		YJL144W	0.277952			YBR137W	8.62841		YBR221C	1101		YBR256C	1.29021
YBR183W	0.236542		YHR159W	0.278017			YBR138C	2.49905		YBR222C	1632		YBR257W	0.322908
YBR184W	-0.912236		YOR083W	0.278035			YBR139W	5.73216		YBR223C	1635		YBR259W	0.257509
YBR186W	-0.635116		YML090W	0.278077			YBR140C	4.17091		YBR225W	2703		YBR260C	0.400231
YBR187W	0.0570653		YOL035C	0.278121			YBR141C	1.9213		YBR228W	915		YBR261C	0.36175
YBR189W	1.05598		YOR235W	0.278291			YBR141W-A	2.28168		YBR229C	2865		YBR262C	0.621075
YBR192W	0.15861		YLR400W	0.278406			YBR142W	4.63404		YBR230C	502		YBR263W	1.10814
YBR194W	0.2928		YLR269C	0.278417			YBR143C	6.12105		YBR230W-A	201		YBR264C	0.263203
YBR199W	0.0723678		YOR008C-A	0.278498			YBR144C	#DIV/0!		YBR231C	912		YBR265W	0.632218
YBR200W	-0.117637		YOL037C	0.278585			YBR145W	5.31921		YBR233W	1242		YBR267W	0.557223
YBR201W	0.2061		YJL197C-A	0.278585			YBR146W	6.94133		YBR233W-A	285		YBR268W	0.322908
YBR202W	-0.00875884		YGL177W	0.278608			YBR147W	3.35791		YBR234C	1155		YBR269C	0.884584
YBR203W	-0.822798		YFL021C-A	0.278681			YBR148W	6.10085		YBR235W	3363		YBR270C	0.222672
YBR205W	0.381798		YPR053C	0.278769			YBR149W	13.7812		YBR236C	1311		YBR271W	0.231815
YBR207W	0.381156		YBR072C-A	0.278795			YBR150C	2.84967		YBR237W	2550		YBR272C	0.43445
YBR210W	0.369005		YPL096C-A	0.278891			YBR151W	6.2464		YBR238C	2196		YBR273C	0.690223
YBR212W	0.362363		YGL123C-A	0.278919			YBR152W	1.49674		YBR239C	1590		YBR274W	0.343103
YBR213W	0.537262		YEL076C-A	0.278959			YBR153W	1.63827		YBR240C	1353		YBR275C	0.48239
YBR214W	0.821575		YLR464W	0.278959			YBR154C	3.60485		YBR241C	1467		YBR276C	0.587156
YBR215W	-0.121135		YBL029C-A	0.278989			YBR155W	4.67987		YBR242W	717		YBR278W	0.426813
YBR217W	-1.01737		YBR200W-A	0.279031			YBR156C	2.03286		YBR243C	1347		YBR279W	0.609011
YBR225W	-0.673478		YOR318C	0.279122			YBR157C	1.60855		YBR244W	489		YBR280C	0.691289
YBR228W	-0.751999		YAL033W	0.279429			YBR158W	1.32179		YBR245C	3390		YBR281C	0.441956
YBR230W-A	1.2127		YNL314W	0.279585			YBR159W	5.66106		YBR246W	1164		YBR282W	0.403246
YBR233W	0.770279		YNL146W	0.279605			YBR160W	3.64159		YBR247C	1452		YBR283C	1.27007
YBR233W-A	0.451902		YGL088W	0.279631			YBR161W	2.96768		YBR248C	1659		YBR284W	0.231899
YBR235W	-0.517717		YGR226C	0.279716			YBR162C	8.4683		YBR249C	1113		YBR285W	0.394209
YBR237W	-0.864739		YDL016C	0.279863			YBR162W-A	8.61847		YBR250W	1572		YBR286W	3.2103
YBR242W	0.643499		YAL031W-A	0.279896			YBR163W	2.29511		YBR251W	924		YBR287W	0.70421
YBR244W	0.744289		YGL182C	0.279962			YBR164C	7.8244		YBR252W	444		YBR288C	0.334672
YBR246W	-0.613736		YPR195C	0.279985			YBR165W	2.59648		YBR253W	366		YBR289W	0.386267
YBR250W	-2.51273		YMR035W	0.280245			YBR166C	4.53323		YBR254C	528		YBR290W	0.672959
YBR251W	1.07644		YDR187C	0.280313			YBR167C	3.15638		YBR255C-A	457		YBR291C	0.892423
YBR252W	1.29478		YDR524W-C	0.280321			YBR168W	2.24395		YBR255W	2085		YBR293W	0.35408
YBR253W	-0.0702791		YLR163W-A	0.280345			YBR169C	9.50167		YBR256C	717		YBR294W	3.39861
YBR255W	-0.936035		YLR438C-A	0.280428			YBR170C	4.90738		YBR257W	840		YBR295W	0.848648
YBR257W	0.65499		YNL198C	0.28044			YBR171W	4.4889		YBR258C	429		YBR296C	0.39431
YBR259W	-1.38841		YBR268W	0.280449			YBR172C	0.918064		YBR259W	2067		YBR297W	0.758279
YBR263W	0.436834		YPL025C	0.280526			YBR173C	10.7777		YBR260C	2001		YBR298C	1.25729
YBR265W	0.331159		YLR426W	0.28053			YBR174C	#DIV/0!		YBR261C	699		YBR299W	1.58854
YBR267W	0.7752		YPL124W	0.280565			YBR175W	3.28618		YBR262C	321		YCL001W	0.693417
YBR268W	0.581019		YPL046C	0.280565			YBR176W	4.78766		YBR263W	1473		YCL001W-A	0.0546977
YBR271W	-0.0662894		YDR066C	0.280862			YBR177C	8.27688		YBR264C	600		YCL001W-B	0.0681075
YBR274W	-0.554253		YGL198W	0.280881			YBR178W	#DIV/0!		YBR265W	963		YCL002C	0.297348
YBR278W	0.915494		YLR338W	0.281088			YBR179C	2.71742		YBR267W	1182		YCL004W	0.262124
YBR279W	0.495081		YOR200W	0.281106			YBR180W	#DIV/0!		YBR268W	318		YCL005W	0.289025
YBR282W	1.1771		YBR224W	0.281165			YBR181C	14.9665		YBR269C	417		YCL008C	0.272192
YBR284W	-1.73598		YLR415C	0.281212			YBR182C	#DIV/0!		YBR270C	1638		YCL009C	1.78584
YBR285W	0.978892		YFR034C	0.281254			YBR182C-A	#DIV/0!		YBR271W	1260		YCL010C	0.394198
YBR286W	0.485286		YPL073C	0.281336			YBR183W	6.12157		YBR272C	1443		YCL011C	0.869857
YBR287W	-0.0354196		YJL152W	0.281423			YBR184W	#DIV/0!		YBR273C	1311		YCL012C	0.400952
YBR289W	0.00567012		YNL338W	0.281512			YBR185C	4.96331		YBR274W	1584		YCL014W	0.383598
YBR290W	0.483647		YKL136W	0.281551			YBR186W	2.83445		YBR275C	5751		YCL016C	0.296802
YBR293W	-2.41689		YPR126C	0.281596			YBR187W	4.69883		YBR276C	2424		YCL017C	0.993494
YBR294W	-0.126554		YMR175W-A	0.281675			YBR188C	5.1125		YBR277C	402		YCL018W	1.04608
YBR295W	-2.0325		YPR039W	0.281701			YBR189W	11.0612		YBR278W	606		YCL021W-A	0.0551527
YBR297W	-0.293984		YLL059C	0.281746			YBR190W	#DIV/0!		YBR279W	1338		YCL024W	0.39373
YBR299W	0.0776619		YDL123W	0.281787			YBR191W	17.8673		YBR280C	1914		YCL025C	0.33705
YCL064C	0.679916		YER172C-A	0.281843			YBR191W-A	14.9938		YBR281C	2637		YCL026C-A	0.0222086
YCL061C	-0.709387		YGL204C	0.28192			YBR192W	3.62012		YBR282W	441		YCL026C-B	0.27038
YCL059C	0.628103		YKL115C	0.282065			YBR193C	4.61444		YBR283C	1473		YCL027W	0.177055
YCL057C-A	1.10467		YHR070C-A	0.282212			YBR194W	3.73325		YBR284W	2394		YCL028W	0.983599
YCL056C	-0.845975		YLL019W-A	0.282232			YBR195C	2.10454		YBR285W	435		YCL029C	0.379872
YCL052C	-0.461177		YFL063W	0.282238			YBR196C	13.949		YBR286W	1614		YCL030C	2.76035
YCL050C	0.984027		YMR272W-B	0.282565			YBR196C-A	#DIV/0!		YBR287W	1284		YCL031C	0.555957
YCL049C	0.482232		YER138W-A	0.282579			YBR196C-B	3.64624		YBR288C	1452		YCL032W	0.47272
YCL047C	0.533597		YGR240C-A	0.282633			YBR197C	3.05504		YBR289W	2718		YCL033C	0.479382
YCL045C	0.206203		YNL038W	0.282684			YBR198C	2.8098		YBR290W	966		YCL034W	0.617199
YCL044C	0.151716		YFL032W	0.282766			YBR199W	4.14321		YBR291C	900		YCL035C	1.33276
YCL043C	0.578103		YGL126W	0.282786			YBR200W	3.46694		YBR292C	372		YCL036W	0.113253
YCL041C	0.831449		YCR075C	0.282883			YBR200W-A	3.64625		YBR293W	1425		YCL037C	0.0341699
YCL038C	-0.161162		YDR327W	0.282917			YBR201C-A	1.67235		YBR294W	2580		YCL038C	0.482147
YCL037C	0.700048		YBL109W	0.282918			YBR201W	2.95755		YBR295W	3651		YCL039W	0.61992
YCL035C	1.54219		YOR060C	0.282949			YBR202W	2.27902		YBR296C	1725		YCL040W	4.69894
YCL033C	1.04339		YIL049W	0.282958			YBR203W	1.40525		YBR297W	1407		YCL043C	2.91754
YCL031C	0.276646		YFL015C	0.282997			YBR204C	4.49752		YBR298C	1845		YCL044C	0.391102
YCL030C	0.608827		YOR384W	0.283022			YBR205W	8.24701		YBR299W	1755		YCL045C	1.06092
YCL029C	-0.0295009		YLR463C	0.283168			YBR206W	7.29241		YCL001W	567		YCL047C	0.269559
YCL026C-B	1.61655		YCR024C-B	0.283198			YBR207W	2.86218		YCL002C	868		YCL048W	0.0799783
YCL026C-A	0.840036		YMR315W-A	0.283317			YBR208C	5.55829		YCL004W	1566		YCL048W-A	0.68045
YCL025C	0.28697		YLR184W	0.283337			YBR209W	#DIV/0!		YCL005W	771		YCL049C	0.546203
YCL017C	0.381283		YPL038W	0.283357			YBR210W	4.50506		YCL005W-A	395		YCL050C	1.00325
YCL016C	0.374345		YPL021W	0.283387			YBR211C	1.94152		YCL008C	1158		YCL051W	0.343779
YCL012C	0.421714		YPL056C	0.283405			YBR212W	4.0429		YCL009C	930		YCL052C	0.7325
YCL011C	0.285428		YAR060C	0.283405			YBR213W	2.76096		YCL010C	780		YCL054W	0.617421
YCL010C	-0.2856		YHR212C	0.283405			YBR214W	8.0811		YCL011C	1284		YCL055W	0.531062
YCL009C	-0.0589444		YNL063W	0.28369			YBR215W	3.2673		YCL012C	472		YCL056C	0.321422
YCL008C	-0.0294935		YDR102C	0.283754			YBR216C	2.43286		YCL014W	4911		YCL057C-A	1.09189
YCL002C	-1.24179		YDR073W	0.283783			YBR217W	3.22393		YCL016C	1143		YCL057W	1.30209
YCR002C	0.634917		YKR035C	0.283812			YBR218C	8.36137		YCL017C	1494		YCL058W-A	0.221913
YCR004C	1.07868		YMR055C	0.283825			YBR219C	#DIV/0!		YCL018W	1095		YCL059C	0.46749
YCR005C	0.512894		YKL165C-A	0.283901			YBR220C	3.67598		YCL021W-A	378		YCL061C	0.350204
YCR007C	-0.748761		YER137W-A	0.28395			YBR221C	18.9736		YCL024W	3114		YCL063W	0.366686
YCR009C	1.01169		YBL071C-B	0.283985			YBR221W-A	#DIV/0!		YCL025C	1902		YCL064C	0.237808
YCR010C	-0.933158		YAL042C-A	0.284023			YBR222C	6.53501		YCL026C-A	582		YCL067C	0.483867
YCR011C	-0.35817		YDR203W	0.28416			YBR223C	3.18432		YCL026C-B	582		YCL073C	0.152363
YCR014C	-4.66533		YBL094C	0.284211			YBR223W-A	#DIV/0!		YCL027W	1539		YCR002C	0.779794
YCR015C	-0.433482		YOL150C	0.284287			YBR224W	#DIV/0!		YCL028W	1218		YCR003W	0.439029
YCR017C	-0.182029		YNL067W-A	0.284346			YBR225W	1.17619		YCL029C	1323		YCR004C	2.04934
YCR020C	-2.03341		YPL062W	0.284404			YBR226C	1.87228		YCL030C	2400		YCR005C	1.15916
YCR020C-A	0.771876		YGR230W	0.284484			YBR227C	3.97559		YCL031C	894		YCR007C	0.189751
YCR021C	0.400985		YKL036C	0.284491			YBR228W	3.91603		YCL032W	1041		YCR008W	0.590164
YCR022C	-3.83865		YLL051C	0.284527			YBR229C	5.20399		YCL033C	507		YCR009C	0.834897
YCR023C	-1.06898		YML102W	0.284644			YBR230C	19.4438		YCL034W	1065		YCR010C	2.20211
YCR024C	-0.494498		YGR011W	0.284647			YBR230W-A	#DIV/0!		YCL035C	333		YCR011C	0.82085
YCR024C-B	-8.63062		YEL033W	0.284666			YBR231C	2.62925		YCL036W	1701		YCR012W	14.431
YCR024C-A	0.610362		YML031C-A	0.284696			YBR232C	#DIV/0!		YCL037C	1305		YCR014C	0.380093
YCR025C	-5.03453		YHL028W	0.284705			YBR233W	3.51268		YCL038C	1587		YCR015C	0.223323
YCR026C	-0.43679		YNL176C	0.284864			YBR233W-A	4.29942		YCL039W	2238		YCR016W	0.273326
YCR027C	-0.362914		YER097W	0.284898			YBR234C	9.16426		YCL040W	1503		YCR017C	1.0926
YCR028C	-0.519748		YLR124W	0.284906			YBR235W	3.11996		YCL041C	495		YCR019W	0.313498
YCR028C-A	1.05543		YBR116C	0.285007			YBR236C	4.70629		YCL043C	1569		YCR020C	0.191617
YCR030C	0.313815		YBR293W	0.285045			YBR237W	1.93105		YCL044C	1254		YCR020C-A	0.299878
YCR031C	0.89466		YOL073C	0.285132			YBR238C	3.39701		YCL045C	2283		YCR020W-B	0.206864
YCR035C	0.49113		YMR068W	0.285505			YBR239C	1.04344		YCL047C	777		YCR021C	3.94325
YCR037C	-1.34996		YER068C-A	0.285512			YBR240C	#DIV/0!		YCL048W	1392		YCR023C	0.494115
YCR038C	-1.01736		YPL144W	0.285531			YBR241C	4.52246		YCL049C	939		YCR024C	0.394987
YCR042C	-0.805649		YMR274C	0.285561			YBR242W	4.08942		YCL050C	966		YCR024C-A	2.08331
YCR043C	0.0878675		YJR018W	0.285563			YBR243C	4.23416		YCL051W	1752		YCR026C	0.570904
YCR044C	-0.246435		YIR020C-B	0.285572			YBR244W	8.32655		YCL052C	1251		YCR027C	0.228278
YCR046C	0.745891		YBR264C	0.285644			YBR245C	4.46828		YCL054W	2526		YCR028C	0.409149
YCR047C	1.03924		YBR051W	0.285735			YBR246W	4.44143		YCL055W	1008		YCR028C-A	1.19352
YCR054C	0.289297		YHR021W-A	0.285737			YBR247C	3.31237		YCL056C	435		YCR030C	0.752758
YCR057C	-0.186576		YOR031W	0.285863			YBR248C	4.35051		YCL057C-A	294		YCR031C	2.79655
YCR059C	-0.340128		YJR140W-A	0.285871			YBR249C	15.0091		YCL057W	2139		YCR032W	0.262945
YCR064C	-2.77256		YMR316C-B	0.285886			YBR250W	#DIV/0!		YCL058W-A	342		YCR033W	0.556051
YCR067C	-0.481265		YBR013C	0.285895			YBR251W	3.23293		YCL059C	951		YCR034W	0.820776
YCR071C	0.901502		YGL042C	0.285904			YBR252W	6.2809		YCL061C	3291		YCR035C	0.431189
YCR072C	0.705018		YML101C	0.286019			YBR253W	5.44782		YCL063W	1272		YCR036W	0.641967
YCR073C	-1.48093		YOL106W	0.286314			YBR254C	3.75834		YCL064C	1083		YCR037C	0.582622
YCR075C	-0.285705		YBR197C	0.286314			YBR255C-A	2.13471		YCR002C	969		YCR038C	0.231836
YCR076C	0.899241		YBR232C	0.286353			YBR255W	1.39825		YCR003W	552		YCR042C	0.508393
YCR077C	0.19162		YJL205C	0.286422			YBR256C	7.56884		YCR004C	744		YCR043C	0.268217
YCR084C	-0.393224		YCL002C	0.286495			YBR257W	1.86692		YCR005C	1383		YCR044C	0.348624
YCR087C-A	1.41357		YHR213W-A	0.286582			YBR258C	4.94577		YCR007C	720		YCR045C	0.216817
YCR090C	0.33433		YDR537C	0.286607			YBR259W	1.5275		YCR008W	1812		YCR046C	0.531826
YCR092C	-0.623845		YDR094W	0.286653			YBR260C	3.41833		YCR009C	798		YCR047C	0.300861
YCR095C	-0.0768036		YLR408C	0.286731			YBR261C	8.20082		YCR010C	852		YCR048W	0.385336
YCR098C	0.252788		YCR045W-A	0.28679			YBR262C	6.08095		YCR011C	3150		YCR051W	0.514252
YCR102C	-0.976368		YLR101C	0.286891			YBR263W	14.5234		YCR012W	1251		YCR052W	0.484687
YCL063W	0.223678		YGR161W-C	0.286965			YBR264C	5.28558		YCR014C	1749		YCR053W	1.5927
YCL058W-A	1.43497		YDR194W-A	0.286988			YBR265W	4.38051		YCR015C	954		YCR054C	0.256161
YCL057W	0.112952		YIL023C	0.286989			YBR266C	#DIV/0!		YCR016W	873		YCR057C	0.449164
YCL055W	0.650605		YER018C	0.286999			YBR267W	1.62		YCR017C	2862		YCR059C	0.325101
YCL054W	0.389632		YBL071C	0.287023			YBR268W	4.51222		YCR019W	1092		YCR060W	0.2711
YCL051W	-0.636075		YAL020C	0.287054			YBR269C	5.80355		YCR020C	648		YCR061W	0.320334
YCL048W	0.209344		YHR130C	0.287111			YBR270C	1.12626		YCR020C-A	267		YCR063W	0.0820473
YCL040W	0.690388		YGR190C	0.287207			YBR271W	3.19177		YCR020W-B	237		YCR065W	0.351731
YCL039W	-0.234376		YOR032W-A	0.287267			YBR272C	3.82197		YCR021C	999		YCR066W	0.230969
YCL036W	-0.353268		YLR011W	0.287321			YBR273C	6.32854		YCR022C	345		YCR067C	0.633295
YCL034W	0.787461		YGL239C	0.287395			YBR274W	4.08778		YCR023C	1836		YCR068W	0.527018
YCL032W	0.269106		YOL085W-A	0.287395			YBR275C	2.70042		YCR024C	1479		YCR069W	1.20013
YCL028W	1.02319		YFR032C-B	0.28742			YBR276C	4.86827		YCR024C-A	123		YCR071C	0.440179
YCL027W	0.0969715		YAR033W	0.287427			YBR277C	2.82242		YCR024C-B	267		YCR072C	0.289199
YCL024W	-0.824596		YER170W	0.287444			YBR278W	4.36675		YCR025C	411		YCR073C	0.2892
YCL021W-A	-6.55883		YEL009C-A	0.287485			YBR279W	3.24906		YCR026C	2229		YCR073W-A	0.568773
YCL018W	-0.712245		YDR130C	0.287694			YBR280C	7.41481		YCR027C	630		YCR075C	0.247097
YCL014W	-1.16925		YLR342W-A	0.287696			YBR281C	4.49987		YCR028C	1539		YCR075W-A	0.202752
YCL005W-A	1.11158		YIL029W-A	0.287697			YBR282W	6.20739		YCR028C-A	491		YCR076C	0.504721
YCL005W	-0.576793		YCL022C	0.287715			YBR283C	6.18561		YCR030C	2613		YCR079W	0.499207
YCL004W	-1.02696		YLR329W	0.28775			YBR284W	#DIV/0!		YCR031C	721		YCR081W	0.28027
YCL001W	1.0849		YOL013W-B	0.28776			YBR285W	#DIV/0!		YCR032W	6504		YCR082W	0.984608
YCR003W	1.31536		YDL069C	0.287763			YBR286W	11.4744		YCR033W	3681		YCR083W	0.47029
YCR008W	-1.74494		YLR132C	0.287772			YBR287W	3.57866		YCR034W	1044		YCR084C	1.2442
YCR012W	0.70967		YJL004C	0.287794			YBR288C	4.26962		YCR035C	1185		YCR086W	0.303391
YCR016W	0.787579		YGL007C-A	0.287797			YBR289W	2.419		YCR036W	1002		YCR087C-A	0.243561
YCR019W	-0.42014		YCR064C	0.287861			YBR290W	2.4308		YCR037C	2772		YCR088W	0.810709
YCR020W-B	-0.567368		YOR186W	0.287917			YBR291C	3.41109		YCR038C	1929		YCR090C	0.342532
YCR032W	-2.09838		YNL240C	0.287928			YBR292C	#DIV/0!		YCR042C	4224		YCR091W	0.379082
YCR033W	-1.30206		YKL086W	0.28826			YBR293W	3.86819		YCR043C	384		YCR092C	0.268618
YCR034W	0.710592		YGR073C	0.288459			YBR294W	2.66733		YCR044C	1074		YCR093W	0.765518
YCR036W	0.501969		YER145C-A	0.288535			YBR295W	2.84578		YCR045C	1476		YCR094W	0.439824
YCR045W-A	-4.01974		YJL133W	0.288628			YBR296C	3.05473		YCR045W-A	351		YCR095C	0.284203
YCR048W	-0.3875		YHR028W-A	0.288655			YBR296C-A	#DIV/0!		YCR046C	510		YCR098C	0.14115
YCR051W	0.505658		YBR153W	0.288824			YBR297W	3.03331		YCR047C	828		YCR099C	0.056419
YCR052W	0.119408		YPL013C	0.288878			YBR298C	#DIV/0!		YCR048W	1833		YCR100C	0.167962
YCR053W	0.872346		YPL044C	0.288931			YBR298C-A	#DIV/0!		YCR051W	669		YDL001W	0.339307
YCR061W	0.515694		YMR151W	0.288931			YBR299W	#DIV/0!		YCR052W	1452		YDL002C	0.396931
YCR063W	-0.204088		YDL185C-A	0.289059			YBR300C	#DIV/0!		YCR053W	1545		YDL003W	0.479457
YCR065W	-0.874758		YAL045C	0.289091			YBR301W	#DIV/0!		YCR054C	1692		YDL004W	2.07077
YCR066W	0.301875		YLR252W	0.289367			YCL001W	5.54911		YCR057C	2772		YDL005C	0.515448
YCR068W	-0.32502		YKL169C	0.289386			YCL001W-A	#DIV/0!		YCR059C	777		YDL006W	0.294934
YCR069W	0.254258		YPR196W	0.289496			YCL001W-B	#DIV/0!		YCR061W	1896		YDL007C-A	0.0005
YCR073W-A	0.661137		YJL015C	0.289577			YCL002C	3.42749		YCR063W	474		YDL007W	1.90844
YCR075W-A	1.3038		YPL136W	0.289643			YCL004W	3.19872		YCR064C	411		YDL008W	0.357944
YCR079W	-1.57115		YHR041C	0.289754			YCL005W	3.01914		YCR065W	1695		YDL010W	0.563169
YCR081W	-1.20692		YNL080C	0.289784			YCL005W-A	14.838		YCR066W	1464		YDL012C	0.384873
YCR082W	0.0869005		YOL032W	0.289862			YCL007C	#DIV/0!		YCR067C	3198		YDL013W	0.377724
YCR083W	0.901092		YPR077C	0.289942			YCL008C	7.30003		YCR068W	1563		YDL014W	1.2248
YCR086W	1.4477		YEL030C-A	0.289981			YCL009C	19.1536		YCR069W	957		YDL015C	1.07832
YCR088W	1.3513		YDR478W	0.290015			YCL010C	4.7746		YCR071C	441		YDL017W	0.26452
YCR089W	-4.97011		YBR206W	0.290052			YCL011C	8.15051		YCR072C	1548		YDL019C	0.738337
YCR091W	-0.73919		YCL056C	0.290143			YCL012C	5.57372		YCR073C	3996		YDL020C	1.82642
YCR093W	-0.820807		YLR299C-A	0.290163			YCL014W	3.21817		YCR073W-A	948		YDL021W	0.405436
YCR094W	-0.058034		YLR255C	0.290187			YCL016C	2.63733		YCR075C	783		YDL022W	2.20077
YCR095W-A	-3.86889		YNL187W	0.290188			YCL017C	8.71517		YCR075W-A	228		YDL024C	0.173176
YCR097W	0.498983		YER148W-A	0.290226			YCL018W	1.5789		YCR076C	753		YDL025C	0.875404
YCR105W	0.811746		YNL120C	0.290292			YCL021W-A	7.88492		YCR077C	2391		YDL027C	0.829903
YCR106W	-1.52867		YKL123W	0.290359			YCL022C	3.10604		YCR079W	1329		YDL028C	0.371375
YCR107W	-3.51259		YBR219C	0.290372			YCL023C	#DIV/0!		YCR081W	4284		YDL029W	1.18577
YDL243C	-2.2381		YGL217C	0.290392			YCL024W	1.82988		YCR082W	387		YDL030W	0.277845
YDL239C	-3.52882		YDL142C	0.290435			YCL025C	1.53942		YCR083W	384		YDL031W	0.72773
YDL238C	-1.11461		YKL018C-A	0.290553			YCL026C-A	#DIV/0!		YCR084C	2142		YDL033C	0.286361
YDL235C	0.493303		YDL022C-A	0.290572			YCL026C-B	#DIV/0!		YCR085W	354		YDL035C	0.613027
YDL234C	0.0933307		YDL054C	0.290574			YCL027W	7.59376		YCR086W	573		YDL036C	0.223576
YDL231C	-3.68778		YHR125W	0.290585			YCL028W	10.3904		YCR087C-A	462		YDL037C	0.12236
YDL227C	0.572939		YCR081C-A	0.290643			YCL029C	2.67088		YCR088W	1779		YDL039C	0.289928
YDL226C	0.582185		YOR105W	0.290708			YCL030C	6.24985		YCR089W	4830		YDL040C	0.720364
YDL224C	-0.584046		YIR030W-A	0.290749			YCL031C	2.10154		YCR090C	549		YDL042C	0.3656
YDL222C	-3.64842		YIL066W-A	0.290754			YCL032W	3.22848		YCR091W	2163		YDL043C	0.247351
YDL220C	-1.3076		YNL017C	0.290763			YCL033C	12.1673		YCR092C	3057		YDL044C	0.303297
YDL217C	0.511326		YPL182C	0.290781			YCL034W	6.50725		YCR093W	6327		YDL045C	0.430378
YDL216C	-0.536853		YMR155W	0.290862			YCL035C	11.2037		YCR094W	1176		YDL045W-A	0.397822
YDL215C	-0.607395		YOR366W	0.290952			YCL036W	1.31668		YCR095C	1089		YDL046W	2.00022
YDL214C	-3.84048		YBR175W	0.291081			YCL037C	3.41599		YCR095W-A	159		YDL047W	0.662437
YDL213C	1.03551		YBR056W-A	0.291135			YCL038C	4.02409		YCR097W	487		YDL048C	0.489193
YDL211C	-0.823213		YPR109W	0.291148			YCL039W	3.92523		YCR098C	1557		YDL049C	0.83069
YDL209C	-0.158422		YLR111W	0.291275			YCL040W	11.7904		YCR102C	1107		YDL051W	0.890659
YDL205C	-0.0546451		YML122C	0.291346			YCL042W	#DIV/0!		YCR105W	1086		YDL052C	0.626679
YDL203C	-0.528955		YOL008W	0.291351			YCL043C	#DIV/0!		YCR106W	2499		YDL053C	0.494592
YDL200C	0.343147		YNL086W	0.291406			YCL044C	2.19628		YCR107W	1092		YDL054C	0.774788
YDL199C	-0.492874		YLR364C-A	0.291557			YCL045C	5.3504		YDL001W	1293		YDL055C	3.00278
YDL198C	0.830728		YJR084W	0.291587			YCL046W	6.04459		YDL002C	612		YDL056W	0.433996
YDL197C	-1.28055		YOR102W	0.291607			YCL047C	5.58488		YDL003W	1701		YDL057W	0.272488
YDL190C	-0.285613		YCL023C	0.29175			YCL048W	#DIV/0!		YDL004W	483		YDL058W	0.206474
YDL188C	0.0862074		YLR236C	0.291792			YCL048W-A	#DIV/0!		YDL005C	1296		YDL059C	0.295097
YDL187C	-2.46262		YOR161W-B	0.291824			YCL049C	6.82618		YDL006W	846		YDL060W	0.590224
YDL184C	0.509938		YOR203W	0.291913			YCL050C	11.3561		YDL007W	1314		YDL061C	1.82696
YDL183C	0.145753		YFR012W	0.292027			YCL051W	3.02874		YDL008W	498		YDL063C	0.410677
YDL177C	-0.483431		YGR039W	0.292101			YCL052C	5.50779		YDL009C	324		YDL064W	0.45079
YDL175C	0.412161		YGL132W	0.292239			YCL054W	2.22338		YDL010W	696		YDL065C	0.637474
YDL174C	0.12598		YOR292C	0.292271			YCL055W	2.93077		YDL012C	410		YDL066W	0.997579
YDL171C	-0.948138		YBL107W-A	0.292323			YCL056C	5.65715		YDL013W	1860		YDL067C	1.28816
YDL169C	-0.374947		YHR048W	0.292476			YCL057C-A	8.61719		YDL014W	984		YDL069C	0.201763
YDL167C	-0.506377		YFL012W	0.292489			YCL057W	8.12866		YDL015C	933		YDL070W	1.48355
YDL166C	0.700659		YDR488C	0.292572			YCL058C	8.15546		YDL017W	1524		YDL072C	1.14484
YDL164C	-0.00216019		YOR392W	0.29264			YCL058W-A	1.23678		YDL018C	678		YDL073W	0.408068
YDL160C-A	0.281415		YER147C-A	0.292832			YCL059C	7.39261		YDL019C	3852		YDL074C	0.661621
YDL160C	0.478477		YGR035W-A	0.292857			YCL061C	2.55787		YDL020C	1596		YDL075W	2.73622
YDL157C	0.775407		YAL064W	0.292943			YCL063W	2.34016		YDL021W	936		YDL076C	0.362894
YDL153C	0.450197		YAL037W	0.293096			YCL064C	1.70296		YDL022W	1176		YDL077C	0.32493
YDL148C	0.425581		YGR031C-A	0.293098			YCL065W	1.63871		YDL024C	1407		YDL078C	1.9727
YDL145C	-0.384943		YGR115C	0.293274			YCL068C	#DIV/0!		YDL025C	1863		YDL079C	0.572729
YDL144C	-0.355096		YJR023C	0.293316			YCL069W	#DIV/0!		YDL025W-A	105		YDL080C	0.451264
YDL142C	0.0233041		YJR056C	0.293342			YCL073C	#DIV/0!		YDL027C	1263		YDL081C	2.37473
YDL140C	-0.891084		YHR212W-A	0.2934			YCL074W	#DIV/0!		YDL028C	2295		YDL082W	1.66997
YDL139C	0.249534		YIR023C-A	0.293446			YCL075W	#DIV/0!		YDL029W	1299		YDL083C	2.51742
YDL135C	0.634919		YER046W-A	0.293449			YCL076W	#DIV/0!		YDL030W	1593		YDL084W	1.74213
YDL134C	0.0447401		YIR018C-A	0.293456			YCR001W	#DIV/0!		YDL031W	2988		YDL085C-A	0.220822
YDL133C-A	0.811582		YIL060W	0.293497			YCR002C	7.2857		YDL032W	312		YDL085W	1.3386
YDL126C	0.458204		YMR040W	0.293597			YCR003W	3.63099		YDL033C	1254		YDL086W	1.04028
YDL125C	0.986717		YOL135C	0.2936			YCR004C	13.3328		YDL035C	2886		YDL087C	0.165425
YDL121C	0.687456		YPR015C	0.29368			YCR005C	2.02597		YDL036C	1389		YDL088C	0.518804
YDL119C	0.530604		YGR031W	0.293754			YCR006C	#DIV/0!		YDL039C	2097		YDL089W	0.382165
YDL115C	0.369988		YLR322W	0.293771			YCR007C	3.39794		YDL040C	2565		YDL090C	0.326268
YDL113C	-0.366096		YAL056C-A	0.293811			YCR008W	3.57769		YDL041W	354		YDL091C	0.561176
YDL111C	0.2838		YLR261C	0.293898			YCR009C	8.37911		YDL042C	1689		YDL092W	0.432816
YDL110C	1.11187		YGR139W	0.294075			YCR010C	#DIV/0!		YDL043C	801		YDL093W	0.40505
YDL109C	-3.21122		YIL020C-A	0.294203			YCR011C	4.03659		YDL044C	1323		YDL095W	1.05551
YDL106C	-0.0152416		YML057C-A	0.294223			YCR012W	16.527		YDL045C	921		YDL097C	1.86817
YDL104C	0.367452		YGR268C	0.294237			YCR013C	14.8085		YDL045W-A	288		YDL098C	0.149026
YDL103C	1.0365		YMR245W	0.294307			YCR014C	1.57316		YDL046W	522		YDL099W	0.804792
YDL101C	0.205684		YKL006C-A	0.294398			YCR015C	4.27249		YDL048C	1473		YDL100C	1.27516
YDL100C	0.70295		YJL202C	0.294468			YCR016W	4.0153		YDL049C	807		YDL101C	0.411548
YDL098C	0.185417		YMR262W	0.294642			YCR017C	6.22512		YDL051W	828		YDL102W	0.325798
YDL097C	0.462037		YNL078W	0.294663			YCR019W	3.67776		YDL052C	912		YDL103C	0.553317
YDL094C	-4.12255		YPR076W	0.294698			YCR020C	3.30609		YDL053C	558		YDL104C	0.237837
YDL091C	0.0473576		YOL159C-A	0.294718			YCR020C-A	14.5869		YDL054C	1461		YDL105W	0.144502
YDL090C	-0.192205		YPR106W	0.294746			YCR020W-B	3.54514		YDL055C	1086		YDL106C	0.419563
YDL088C	0.135851		YML012C-A	0.294748			YCR021C	2.05268		YDL056W	2502		YDL107W	0.330938
YDL087C	-0.0165039		YMR030W-A	0.294776			YCR022C	#DIV/0!		YDL057W	987		YDL108W	0.349352
YDL086C-A	-3.61894		YER085C	0.294964			YCR023C	3.48271		YDL058W	5373		YDL109C	0.231357
YDL085C-A	0.318655		YBR269C	0.294989			YCR024C	3.39762		YDL059C	717		YDL110C	1.43878
YDL083C	0.739778		YER039C-A	0.29508			YCR024C-A	8.50043		YDL060W	2367		YDL111C	0.436209
YDL081C	0.693754		YMR059W	0.295115			YCR024C-B	8.47371		YDL061C	171		YDL112W	0.487978
YDL080C	-1.31261		YLL037W	0.295121			YCR025C	1.1995		YDL063C	1863		YDL113C	0.503932
YDL079C	-2.07906		YDR126W	0.295223			YCR026C	2.36696		YDL064W	584		YDL114W	0.037033
YDL078C	0.712227		YJL215C	0.295245			YCR027C	2.45593		YDL065C	1029		YDL115C	0.657935
YDL077C	-1.05102		YAR019W-A	0.29528			YCR028C	2.84297		YDL066W	1287		YDL116W	0.471389
YDL076C	0.146993		YER058W	0.295314			YCR028C-A	12.5141		YDL067C	180		YDL117W	0.420399
YDL074C	-0.304506		YMR326C	0.295382			YCR030C	5.42811		YDL068W	330		YDL119C	0.196043
YDL072C	0.929701		YHR218W	0.295399			YCR031C	19.2186		YDL069C	690		YDL120W	0.535628
YDL069C	-0.570663		YDR459C	0.29545			YCR032W	2.86515		YDL070W	1917		YDL121C	0.458213
YDL067C	0.904532		YAL019W-A	0.295462			YCR033W	1.95081		YDL072C	612		YDL122W	0.649748
YDL065C	0.876545		YDR526C	0.29553			YCR034W	6.54329		YDL073W	2955		YDL123W	0.425573
YDL063C	-0.0957899		YGL237C	0.295579			YCR035C	2.74928		YDL074C	2103		YDL124W	3.11427
YDL061C	1.09011		YGL247W	0.29559			YCR036W	5.69513		YDL075W	763		YDL125C	1.60626
YDL059C	0.364001		YDL032W	0.295612			YCR037C	3.27927		YDL076C	885		YDL126C	3.49278
YDL055C	0.806866		YBL013W	0.295811			YCR041W	#DIV/0!		YDL077C	3150		YDL127W	0.230299
YDL054C	0.343766		YNL162W-A	0.295832			YCR042C	2.34031		YDL078C	1032		YDL128W	1.14444
YDL053C	0.520415		YPR012W	0.295834			YCR043C	4.81211		YDL079C	1798		YDL129W	0.240353
YDL052C	0.64104		YDR043C	0.29588			YCR044C	4.76662		YDL080C	1830		YDL130W	1.79013
YDL049C	-0.413597		YPR094W	0.29598			YCR045C	3.63318		YDL081C	321		YDL130W-A	0.843579
YDL048C	-0.107127		YEL008W	0.296011			YCR045W-A	6.75012		YDL082W	965		YDL131W	2.30399
YDL045C	0.198145		YJR112W-A	0.296022			YCR046C	5.80935		YDL083C	864		YDL132W	0.836559
YDL044C	0.337596		YBR277C	0.296031			YCR047C	3.29618		YDL084W	1341		YDL133W	0.4758
YDL043C	0.501527		YNL046W	0.29605			YCR047W-A	2.27737		YDL085C-A	207		YDL134C	0.82702
YDL042C	0.0204213		YBR109W-A	0.296059			YCR048W	4.50775		YDL085W	1638		YDL135C	0.699348
YDL040C	0.338932		YHR145C	0.296084			YCR049C	3.09134		YDL086C-A	435		YDL136W	3.32723
YDL039C	-3.50203		YNR045W	0.296094			YCR050C	5.26227		YDL086W	822		YDL137W	2.32024
YDL036C	-0.344659		YCR108C	0.296119			YCR051W	8.19064		YDL087C	786		YDL138W	0.471835
YDL035C	-0.979757		YOL047C	0.296219			YCR052W	4.94683		YDL088C	1587		YDL139C	0.139478
YDL033C	-0.36985		YJR136C	0.296324			YCR053W	9.4605		YDL089W	1455		YDL140C	1.28772
YDL028C	-0.831864		YLL033W	0.296326			YCR054C	1.87494		YDL090C	1296		YDL141W	0.399294
YDL027C	-0.677111		YOR301W	0.296334			YCR057C	2.28112		YDL091C	1368		YDL142C	0.298612
YDL025C	-0.490519		YNL303W	0.296344			YCR059C	9.36609		YDL092W	441		YDL143W	1.29228
YDL024C	-0.998525		YBR005W	0.296464			YCR060W	6.64828		YDL093W	2232		YDL144C	0.67313
YDL020C	-0.321721		YKR055W	0.29653			YCR061W	8.45615		YDL094C	510		YDL145C	1.28747
YDL019C	-0.636594		YCR050C	0.296609			YCR063W	#DIV/0!		YDL095W	2454		YDL146W	0.181061
YDL018C	0.547135		YJL199C	0.296651			YCR064C	#DIV/0!		YDL097C	1305		YDL147W	1.68919
YDL015C	0.694488		YOR130C	0.296677			YCR065W	1.57472		YDL098C	585		YDL148C	0.449377
YDL012C	1.14428		YLR217W	0.29672			YCR066W	2.14233		YDL099W	1026		YDL149W	0.408315
YDL009C	-6.34333		YEL059C-A	0.296802			YCR067C	3.12304		YDL100C	1065		YDL150W	0.421414
YDL005C	0.0596178		YLR141W	0.296825			YCR068W	2.87961		YDL101C	1542		YDL153C	0.594966
YDL002C	0.31393		YPR068C	0.296977			YCR069W	5.67488		YDL102W	3294		YDL154W	0.252412
YDR001C	0.0665289		YGR022C	0.296986			YCR071C	4.70064		YDL103C	1434		YDL155W	0.478207
YDR005C	0.0862409		YER147C	0.297062			YCR072C	1.49325		YDL104C	1224		YDL156W	0.207373
YDR006C	-0.68534		YML041C	0.297128			YCR073C	2.01327		YDL105W	1209		YDL157C	0.456623
YDR008C	-2.15967		YDR525W	0.297148			YCR073W-A	8.61532		YDL106C	1680		YDL159W	0.327163
YDR016C	0.22732		YIL006W	0.297169			YCR075C	4.13593		YDL107W	1056		YDL160C	0.262185
YDR017C	-0.752606		YJL161W	0.297193			YCR075W-A	2.56382		YDL108W	1002		YDL160C-A	0.130638
YDR018C	-0.359602		YKL131W	0.297527			YCR076C	7.24557		YDL109C	1944		YDL161W	0.690338
YDR019C	0.779869		YDR223W	0.297577			YCR077C	4.59689		YDL110C	453		YDL164C	0.440001
YDR020C	-0.195539		YBL059W	0.297599			YCR079W	3.33986		YDL111C	798		YDL165W	0.363907
YDR022C	-0.592618		YJR058C	0.297614			YCR081C-A	6.94827		YDL112W	4311		YDL166C	0.363019
YDR026C	-0.671747		YIL054W	0.297651			YCR081W	1.79914		YDL113C	1923		YDL167C	0.361046
YDR027C	-0.853778		YDL151C	0.297676			YCR082W	6.43166		YDL114W	927		YDL168W	0.882091
YDR028C	-0.927216		YNL188W	0.297684			YCR083W	13.7569		YDL115C	1132		YDL169C	0.442891
YDR030C	-0.665826		YOR097C	0.297727			YCR084C	4.90794		YDL116W	2181		YDL170W	0.565251
YDR032C	1.43023		YML064C	0.29774			YCR085W	#DIV/0!		YDL117W	2658		YDL171C	2.11835
YDR034C	-0.878649		YAL068W-A	0.297745			YCR086W	2.79584		YDL119C	924		YDL173W	1.00364
YDR036C	0.160714		YLR162W	0.297776			YCR087C-A	5.3977		YDL120W	525		YDL174C	1.6232
YDR038C	-0.709285		YDR045C	0.297798			YCR087W	7.62603		YDL121C	450		YDL175C	0.305644
YDR042C	-0.0679479		YLR368W	0.297822			YCR088W	13.4512		YDL122W	2430		YDL176W	0.259733
YDR045C	0.446742		YNR005C	0.29785			YCR089W	2.09662		YDL123W	423		YDL177C	0.178792
YDR046C	-0.132546		YJL083W	0.297934			YCR090C	5.91815		YDL124W	939		YDL178W	0.965895
YDR048C	-0.786147		YBL021C	0.297952			YCR091W	2.81687		YDL125C	588		YDL179W	0.33146
YDR050C	1.06055		YOR231W	0.297981			YCR092C	1.7957		YDL126C	2508		YDL180W	0.434655
YDR051C	0.472243		YHR173C	0.298004			YCR093W	2.41275		YDL127W	927		YDL181W	1.0028
YDR052C	-0.692937		YDR185C	0.298103			YCR094W	5.75848		YDL128W	1236		YDL182W	2.33242
YDR054C	0.150342		YBR099C	0.29836			YCR095C	1.83536		YDL129W	876		YDL183C	0.330859
YDR056C	0.680204		YJL110C	0.29842			YCR095W-A	#DIV/0!		YDL130W	622		YDL185W	1.86882
YDR058C	-0.106036		YNR049C	0.29844			YCR096C	5.22323		YDL130W-A	261		YDL186W	0.0611731
YDR059C	0.361032		YIL102C-A	0.298447			YCR097W	8.78443		YDL131W	1323		YDL188C	0.606074
YDR066C	0.571407		YLR102C	0.298461			YCR097W-A	#DIV/0!		YDL132W	2448		YDL189W	0.451274
YDR067C	-0.0633035		YOR380W	0.29854			YCR098C	3.92789		YDL133C-A	78		YDL190C	0.585177
YDR069C	-1.21291		YDL196W	0.298552			YCR099C	3.17091		YDL133W	1314		YDL192W	1.92858
YDR070C	-0.436644		YER186C	0.298589			YCR100C	1.862		YDL134C	1110		YDL193W	0.493563
YDR071C	1.04004		YBR064W	0.29859			YCR101C	#DIV/0!		YDL135C	609		YDL194W	0.411449
YDR072C	0.0801011		YER006C-A	0.298749			YCR102C	#DIV/0!		YDL136W	768		YDL195W	1.40521
YDR078C	-1.31684		YGR133W	0.298771			YCR102W-A	#DIV/0!		YDL137W	546		YDL197C	0.768552
YDR079C-A	-0.087492		YOR266W	0.298774			YCR104W	6.04102		YDL138W	2292		YDL198C	1.17639
YDR081C	-0.559941		YOR295W	0.298779			YCR105W	#DIV/0!		YDL139C	672		YDL199C	0.566653
YDR084C	0.371648		YML003W	0.298858			YCR106W	2.34845		YDL140C	5202		YDL200C	0.483407
YDR085C	-1.38262		YBL102W	0.298947			YCR107W	9.34639		YDL141W	2073		YDL201W	0.410167
YDR086C	0.607808		YCR095W-A	0.298993			YDL001W	2.3419		YDL142C	852		YDL202W	0.597484
YDR087C	1.13549		YDR250C	0.29907			YDL002C	1.86084		YDL143W	1587		YDL203C	0.386622
YDR088C	0.515064		YDR209C	0.299364			YDL003W	2.01542		YDL144C	1071		YDL204W	2.11601
YDR090C	0.0234421		YMR187C	0.2994			YDL004W	12.314		YDL145C	3606		YDL205C	0.471399
YDR091C	0.148388		YPL041C	0.299533			YDL005C	3.45075		YDL146W	1476		YDL206W	0.314642
YDR097C	-0.303563		YLR374C	0.299672			YDL006W	2.28881		YDL147W	1338		YDL207W	0.563725
YDR098C	1.06798		YDL176W	0.299697			YDL007C-A	#DIV/0!		YDL148C	2433		YDL208W	0.856517
YDR101C	0.351653		YMR082C	0.299719			YDL007W	8.00975		YDL149W	2994		YDL209C	0.249103
YDR104C	-1.53518		YMR320W	0.299789			YDL008W	6.51417		YDL150W	1269		YDL210W	0.126166
YDR105C	0.132203		YER119C-A	0.299826			YDL009C	3.89726		YDL153C	1833		YDL211C	0.15981
YDR107C	-0.354462		YPL097W	0.299833			YDL010W	3.74295		YDL154W	2706		YDL212W	1.04618
YDR109C	-0.549007		YJR114W	0.299869			YDL011C	5.48153		YDL155W	1284		YDL213C	0.582139
YDR111C	-0.0952963		YLR416C	0.299905			YDL012C	6.22146		YDL156W	1569		YDL214C	0.773635
YDR113C	0.546306		YMR172C-A	0.299921			YDL013W	1.88298		YDL157C	357		YDL215C	1.84738
YDR116C	0.422522		YNR020C	0.300032			YDL014W	7.09706		YDL159W	1548		YDL216C	0.215426
YDR117C	0.479701		YKL206C	0.300056			YDL015C	6.62781		YDL160C	1521		YDL217C	0.369034
YDR120C	0.20785		YGR101W	0.300102			YDL016C	5.38413		YDL160C-A	243		YDL218W	1.43994
YDR123C	-0.772667		YJL075C	0.300116			YDL017W	2.34347		YDL161W	1365		YDL219W	0.248069
YDR125C	-2.005		YDR157W	0.300118			YDL018C	4.20148		YDL164C	2268		YDL220C	0.193515
YDR129C	0.885907		YGL166W	0.300189			YDL019C	4.67332		YDL165W	576		YDL222C	1.50689
YDR130C	0.231836		YDL114W	0.300246			YDL020C	2.25117		YDL166C	594		YDL223C	1.85797
YDR131C	-0.415461		YNL109W	0.300275			YDL021W	2.87548		YDL167C	2160		YDL224C	0.804717
YDR132C	0.120413		YIL012W	0.300348			YDL022C-A	#DIV/0!		YDL168W	1161		YDL225W	0.608669
YDR133C	-0.270311		YLR041W	0.300363			YDL022W	7.3959		YDL169C	672		YDL226C	0.627261
YDR135C	-0.305331		YMR052C-A	0.300422			YDL023C	6.57637		YDL170W	1587		YDL227C	0.558812
YDR139C	0.218482		YEL028W	0.300442			YDL024C	#DIV/0!		YDL171C	6438		YDL230W	0.276674
YDR141C	-0.713394		YGL003C	0.300545			YDL025C	5.06177		YDL173W	888		YDL231C	0.596916
YDR142C	-0.212856		YPR170C	0.300613			YDL025W-A	4.94902		YDL174C	1764		YDL232W	0.342979
YDR143C	-0.375299		YCR102W-A	0.300661			YDL026W	#DIV/0!		YDL175C	1035		YDL233W	0.251792
YDR144C	-0.382828		YBR196C-A	0.300691			YDL027C	4.95886		YDL176W	2127		YDL234C	0.835684
YDR146C	-0.0354778		YLR365W	0.300701			YDL028C	1.88425		YDL177C	513		YDL235C	0.529766
YDR148C	0.818028		YBL077W	0.300781			YDL029W	7.14314		YDL178W	1593		YDL236W	0.674
YDR151C	0.0893918		YBR062C	0.30083			YDL030W	2.35903		YDL179W	915		YDL237W	0.572025
YDR153C	0.8188		YOL146W	0.300854			YDL031W	3.27389		YDL180W	1644		YDL238C	0.223175
YDR162C	0.766728		YPR093C	0.300872			YDL032W	#DIV/0!		YDL181W	258		YDL239C	0.198523
YDR164C	-0.53005		YOL072W	0.300935			YDL033C	2.92443		YDL182W	1287		YDL240W	0.328802
YDR166C	-0.305396		YMR007W	0.300949			YDL034W	#DIV/0!		YDL183C	963		YDL241W	0.0324587
YDR169C	-0.203107		YKL048C	0.30097			YDL035C	2.5089		YDL184C	78		YDL243C	0.212668
YDR170C	-0.849472		YER076W-A	0.301212			YDL036C	3.55724		YDL185W	3216		YDL245C	0.314034
YDR173C	-0.177973		YHL046W-A	0.301296			YDL040C	7.43971		YDL187C	330		YDL246C	0.298067
YDR175C	0.746214		YPL149W	0.301305			YDL041W	#DIV/0!		YDL188C	1134		YDR001C	1.26784
YDR179C	0.3267		YMR052W	0.301367			YDL042C	2.54312		YDL189W	1374		YDR002W	1.31335
YDR181C	-0.633363		YKL221W	0.30137			YDL043C	2.64451		YDL190C	2886		YDR003W	0.651636
YDR185C	0.792761		YMR283C	0.30139			YDL044C	1.27083		YDL191W	854		YDR004W	0.502771
YDR186C	-1.03786		YDR124W	0.301402			YDL045C	4.13257		YDL192W	546		YDR005C	0.754865
YDR190C	0.651874		YDR053W	0.30142			YDL045W-A	5.58114		YDL193W	1128		YDR006C	0.553695
YDR192C	0.607646		YBL100W-C	0.301456			YDL046W	9.75474		YDL194W	2655		YDR007W	0.507239
YDR194C	-0.182785		YMR290W-A	0.301659			YDL047W	3.37204		YDL195W	3822		YDR009W	0.277052
YDR196C	-0.0782704		YPR136C	0.301684			YDL048C	1.3289		YDL197C	1578		YDR011W	1.13083
YDR198C	0.0525872		YLR296W	0.301691			YDL049C	2.67402		YDL198C	903		YDR012W	4.76292
YDR200C	-0.730576		YPL060W	0.301738			YDL050C	6.21623		YDL199C	2064		YDR013W	0.227041
YDR202C	-0.215665		YDL199C	0.30176			YDL051W	6.85869		YDL200C	567		YDR014W	0.196291
YDR207C	-0.239618		YML100W-A	0.301785			YDL052C	3.89469		YDL201W	861		YDR014W-A	0.0588311
YDR217C	-0.849802		YPR182W	0.301811			YDL053C	4.25757		YDL202W	750		YDR016C	0.236857
YDR218C	-0.67415		YER129W	0.301821			YDL054C	3.94908		YDL203C	1872		YDR017C	0.522191
YDR219C	-0.107525		YBL111C	0.301893			YDL055C	7.66884		YDL204W	1182		YDR018C	0.411639
YDR224C	1.09998		YMR316C-A	0.301901			YDL056W	1.26151		YDL205C	984		YDR019C	1.18757
YDR228C	0.106501		YER190W	0.30191			YDL057W	#DIV/0!		YDL206W	2289		YDR020C	0.1676
YDR231C	0.579307		YML066C	0.301912			YDL058W	3.61749		YDL207W	1617		YDR021W	0.160608
YDR233C	0.609067		YDR034W-B	0.301952			YDL059C	7.32094		YDL208W	471		YDR022C	0.263657
YDR236C	-0.22203		YDR438W	0.301992			YDL060W	3.08541		YDL209C	1020		YDR023W	1.42827
YDR238C	-0.00619044		YJL043W	0.301994			YDL061C	16.4662		YDL210W	1716		YDR026C	0.401281
YDR239C	-0.36127		YKL102C	0.302055			YDL062W	#DIV/0!		YDL211C	1119		YDR028C	0.924462
YDR240C	0.0445894		YOR073W-A	0.302055			YDL063C	2.63255		YDL212W	633		YDR030C	0.262222
YDR243C	-0.41933		YMR144W	0.302101			YDL064W	6.47977		YDL213C	678		YDR031W	0.350597
YDR248C	0.448641		YDR411C	0.302138			YDL065C	3.47922		YDL214C	2100		YDR032C	2.31576
YDR249C	-0.779002		YAL055W	0.30214			YDL066W	12.283		YDL215C	3279		YDR033W	2.53882
YDR253C	-0.720058		YCL008C	0.302211			YDL067C	6.32596		YDL216C	1323		YDR034C	0.719805
YDR255C	-1.18076		YBR284W	0.302212			YDL068W	#DIV/0!		YDL217C	624		YDR035W	1.69194
YDR256C	-2.63907		YJR157W	0.302221			YDL069C	4.50518		YDL218W	954		YDR036C	1.17081
YDR257C	-0.275947		YOL009C	0.302224			YDL070W	2.13191		YDL219W	524		YDR037W	1.46456
YDR258C	0.32716		YDL183C	0.302239			YDL071C	#DIV/0!		YDL220C	2775		YDR040C	0.974503
YDR259C	-1.16494		YFR036W-A	0.30233			YDL072C	7.07524		YDL221W	552		YDR041W	0.6935
YDR260C	0.0143054		YJR034W	0.302341			YDL073W	2.73208		YDL222C	930		YDR042C	0.0499828
YDR261C	-0.257322		YLR466W	0.302356			YDL074C	2.44142		YDL224C	1950		YDR043C	0.739889
YDR263C	-1.80291		YNL157W	0.302356			YDL075W	19.9606		YDL225W	1656		YDR044W	0.503449
YDR264C	-0.519547		YIR036W-A	0.302366			YDL076C	3.65143		YDL226C	1059		YDR045C	0.227526
YDR266C	-0.328936		YCR079W	0.302383			YDL077C	2.67157		YDL227C	1761		YDR046C	0.105568
YDR267C	0.289616		YMR282C	0.302384			YDL078C	13.4887		YDL229W	1842		YDR047W	0.583796
YDR276C	0.854909		YJL119C	0.302412			YDL079C	4.26901		YDL230W	1008		YDR049W	0.314795
YDR277C	-0.257691		YGR099W	0.302494			YDL080C	2.18574		YDL231C	3378		YDR050C	6.20786
YDR281C	0.174138		YCL066W	0.302496			YDL081C	16.2877		YDL232W	111		YDR051C	0.497452
YDR282C	-0.303266		YCR040W	0.302496			YDL082W	11.2636		YDL233W	1377		YDR052C	0.552426
YDR283C	-1.27642		YBR298C-A	0.30252			YDL083C	16.7612		YDL234C	2241		YDR054C	0.793998
YDR284C	0.305485		YDR004W	0.30252			YDL084W	11.1519		YDL235C	504		YDR055W	2.5411
YDR286C	0.405404		YDR320W-B	0.302556			YDL085C-A	11.9917		YDL236W	939		YDR056C	0.696108
YDR289C	0.653717		YLL060C	0.30257			YDL085W	#DIV/0!		YDL237W	1173		YDR057W	0.478348
YDR292C	0.0325104		YNL326C	0.302592			YDL086C-A	10.8693		YDL238C	1470		YDR058C	0.247313
YDR293C	-1.16021		YBR076C-A	0.302631			YDL086W	11.7505		YDL239C	2373		YDR059C	1.06029
YDR294C	0.185904		YPR014C	0.302681			YDL087C	3.4234		YDL240W	3054		YDR060W	0.821262
YDR295C	-0.00731855		YNL150W	0.302701			YDL088C	2.16923		YDL241W	372		YDR061W	0.568411
YDR298C	0.512016		YGR018C	0.302725			YDL089W	2.56439		YDL242W	354		YDR062W	1.02029
YDR300C	0.513036		YGR247W	0.302761			YDL090C	5.5372		YDL243C	990		YDR063W	0.546379
YDR303C	-0.478183		YPL151C	0.302816			YDL091C	2.27502		YDL244W	1023		YDR064W	3.69447
YDR304C	1.07919		YOR186C-A	0.302874			YDL092W	5.03286		YDL248W	1152		YDR065W	0.232176
YDR305C	0.706249		YNL165W	0.302878			YDL093W	3.95662		YDR001C	2256		YDR066C	0.193947
YDR306C	-0.734859		YKL138C-A	0.302901			YDL094C	6.01985		YDR002W	606		YDR067C	0.341298
YDR308C	1.12441		YML133W-A	0.302911			YDL095W	5.95285		YDR003W-A	123		YDR068W	0.4947
YDR309C	0.585347		YPL283W-A	0.302911			YDL096C	5.8034		YDR004W	1383		YDR069C	0.326229
YDR310C	-1.01296		YGR296C-A	0.302911			YDL097C	6.10151		YDR005C	1268		YDR070C	2.53426
YDR313C	-0.77655		YNL339W-A	0.302911			YDL098C	4.32819		YDR006C	2706		YDR071C	0.953673
YDR314C	-2.09798		YER190C-A	0.302911			YDL099W	3.82485		YDR007W	675		YDR072C	0.801204
YDR315C	-1.0185		YJL218W	0.302916			YDL100C	14.59		YDR008C	351		YDR073W	0.366938
YDR319C	0.0302466		YLL065W	0.302979			YDL101C	3.97039		YDR009W	1563		YDR074W	2.48852
YDR320C	0.0503259		YLR339C	0.303129			YDL102W	3.14283		YDR010C	333		YDR075W	0.487571
YDR320C-A	0.337083		YDR405W	0.303386			YDL103C	7.509		YDR011W	4506		YDR076W	0.263016
YDR322C-A	0.96408		YPR199C	0.303388			YDL104C	2.98436		YDR012W	1089		YDR077W	15.4526
YDR323C	-0.461964		YBR128C	0.303405			YDL105W	2.52108		YDR013W	627		YDR078C	0.30291
YDR324C	0.108205		YLR099W-A	0.303427			YDL106C	2.67868		YDR014W	1944		YDR079C-A	0.182126
YDR326C	-1.19408		YPR107C	0.303437			YDL107W	4.33878		YDR014W-A	489		YDR079W	0.335949
YDR328C	0.695626		YER066W	0.303459			YDL108W	4.59925		YDR016C	285		YDR080W	0.411178
YDR329C	0.0544504		YER187W	0.303498			YDL109C	1.69202		YDR017C	3153		YDR081C	0.464136
YDR333C	-0.32023		YJL188C	0.303516			YDL110C	14.6002		YDR018C	1191		YDR082W	0.320595
YDR338C	-0.492946		YBR266C	0.303527			YDL111C	3.75046		YDR019C	1203		YDR083W	0.347276
YDR339C	0.889449		YOR315W	0.303541			YDL112W	4.53804		YDR020C	699		YDR084C	0.408787
YDR341C	0.501446		YJL023C	0.303577			YDL113C	3.80757		YDR021W	1200		YDR085C	0.595927
YDR342C	0.982218		YPR011C	0.303694			YDL114W	#DIV/0!		YDR022C	591		YDR086C	0.929216
YDR343C	1.01909		YHR007C-A	0.303704			YDL114W-A	#DIV/0!		YDR023W	1389		YDR087C	0.411019
YDR345C	0.487446		YHL019W-A	0.303716			YDL115C	4.21526		YDR024W	486		YDR088C	0.253775
YDR346C	0.139306		YGL214W	0.303726			YDL116W	2.52226		YDR025W	810		YDR089W	0.401834
YDR348C	0.414375		YBR113W	0.303728			YDL117W	1.66226		YDR026C	1713		YDR090C	0.409992
YDR349C	-0.926992		YJR037W	0.303758			YDL118W	#DIV/0!		YDR027C	2670		YDR091C	1.02215
YDR350C	-1.18138		YOL160W	0.303777			YDL119C	2.42935		YDR028C	3045		YDR092W	0.856681
YDR357C	-0.447881		YLR381W	0.303812			YDL120W	6.95049		YDR030C	1521		YDR093W	0.375817
YDR359C	-1.6793		YDR067C	0.303874			YDL121C	4.15153		YDR031W	366		YDR096W	0.530839
YDR361C	0.543786		YLR085C	0.303901			YDL122W	3.15821		YDR032C	597		YDR097C	0.520857
YDR362C	-0.300455		YDR015C	0.303915			YDL123W	4.49823		YDR033W	963		YDR098C	0.594117
YDR364C	-0.784668		YDR401W	0.303944			YDL124W	13.7112		YDR034C	2373		YDR099W	2.82256
YDR365C	0.439669		YDR512C	0.304032			YDL125C	8.41137		YDR034W-B	156		YDR100W	0.648707
YDR366C	-4.88536		YCR085W	0.304048			YDL126C	10.3196		YDR035W	1113		YDR101C	0.685457
YDR369C	-0.376284		YBR070C	0.304057			YDL127W	2.85746		YDR036C	1503		YDR103W	0.375506
YDR370C	-0.880746		YIL001W	0.30406			YDL128W	4.34015		YDR037W	1776		YDR104C	0.362373
YDR372C	0.0325222		YGL188C	0.304157			YDL129W	2.22712		YDR038C	3276		YDR105C	0.617128
YDR375C	-0.173468		YIL059C	0.304178			YDL130W	20.991		YDR041W	612		YDR106W	0.091731
YDR378C	-0.0330716		YLR122C	0.30418			YDL130W-A	12.9252		YDR042C	603		YDR107C	0.209378
YDR379C-A	0.230081		YDL175C	0.304259			YDL131W	6.25013		YDR044W	987		YDR108W	0.319425
YDR381C-A	0.78154		YHL048C-A	0.304273			YDL132W	3.78886		YDR045C	333		YDR109C	0.471726
YDR383C	0.681416		YBR098W	0.304282			YDL133C-A	15.9209		YDR046C	1815		YDR110W	0.372543
YDR384C	0.878251		YIL058W	0.304318			YDL133W	2.32686		YDR047W	1089		YDR111C	0.533359
YDR387C	-1.29224		YDL013W	0.304342			YDL134C	3.91541		YDR048C	315		YDR113C	0.406208
YDR390C	0.0850275		YGR222W	0.304373			YDL135C	7.74166		YDR049W	1899		YDR115W	0.508351
YDR391C	0.415658		YMR141W-A	0.304379			YDL136W	17.2298		YDR050C	747		YDR116C	0.563484
YDR397C	0.286518		YLR332W	0.304437			YDL137W	15.6431		YDR051C	1005		YDR117C	0.353755
YDR402C	-1.84508		YDR350C	0.304468			YDL138W	1.78329		YDR052C	2115		YDR118W	0.278804
YDR404C	0.309858		YHR217C	0.30447			YDL139C	6.07965		YDR054C	888		YDR119W	0.580233
YDR407C	-1.45709		YDL028C	0.30452			YDL140C	3.3344		YDR055W	1335		YDR119W-A	1.57521
YDR408C	0.463538		YLR313C	0.304541			YDL141W	4.53331		YDR056C	618		YDR120C	0.698158
YDR410C	0.0889561		YPR130C	0.304544			YDL142C	4.08915		YDR057W	1629		YDR121W	0.289761
YDR411C	0.644392		YML119W	0.304583			YDL143W	7.6214		YDR058C	981		YDR122W	0.748321
YDR414C	-0.594102		YPL251W	0.304593			YDL144C	8.3853		YDR059C	537		YDR123C	0.364342
YDR415C	0.741427		YPL236C	0.304608			YDL145C	7.23962		YDR060W	3078		YDR124W	0.193979
YDR422C	-0.566648		YBR210W	0.304794			YDL146W	3.50295		YDR061W	1620		YDR125C	0.202115
YDR423C	0.228362		YDR544C	0.304822			YDL147W	4.37359		YDR062W	1686		YDR126W	0.267857
YDR424C	1.00798		YPR160C-A	0.304848			YDL148C	3.99366		YDR063W	450		YDR127W	1.68241
YDR428C	-0.0109833		YOR005C	0.304872			YDL149W	4.69125		YDR064W	995		YDR128W	0.467092
YDR429C	0.872651		YCR027C	0.304901			YDL150W	3.15823		YDR065W	1098		YDR129C	1.37173
YDR430C	-0.373819		YJR079W	0.30499			YDL151C	2.61839		YDR066C	591		YDR130C	0.314387
YDR435C	0.0894654		YDR410C	0.304991			YDL152W	#DIV/0!		YDR067C	675		YDR131C	0.2499
YDR441C	-0.371848		YNR027W	0.304996			YDL153C	5.08021		YDR068W	933		YDR132C	0.332201
YDR443C	-1.52392		YGR131W	0.304999			YDL154W	1.05379		YDR069C	2781		YDR135C	0.826452
YDR445C	-6.34853		YLL066W-B	0.305025			YDL155W	1.3234		YDR070C	282		YDR137W	0.440848
YDR447C	0.878785		YLR171W	0.305057			YDL156W	1.20764		YDR071C	576		YDR138W	0.346999
YDR449C	0.280216		YPR186C	0.305085			YDL157C	13.6357		YDR072C	1584		YDR139C	0.485042
YDR451C	0.679328		YDL162C	0.305101			YDL158C	#DIV/0!		YDR073W	510		YDR140W	0.308024
YDR453C	-0.407363		YIL153W	0.305149			YDL159C-B	2.29801		YDR074W	2691		YDR141C	0.490768
YDR454C	0.666191		YER107W-A	0.305171			YDL159W	2.6908		YDR075W	927		YDR142C	0.428871
YDR458C	-0.143552		YPR099C	0.305229			YDL159W-A	#DIV/0!		YDR076W	1221		YDR143C	0.414345
YDR459C	-1.68901		YKL084W	0.305231			YDL160C	5.11486		YDR077W	1017		YDR144C	0.305359
YDR461C-A	0.96984		YLL010C	0.305234			YDL160C-A	5.84495		YDR078C	672		YDR145W	0.778334
YDR465C	0.324094		YNL053W	0.30533			YDL161W	4.68206		YDR079C-A	219		YDR146C	0.465974
YDR468C	0.536432		YLR353W	0.30535			YDL162C	#DIV/0!		YDR079W	336		YDR147W	0.336811
YDR470C	0.180868		YCR049C	0.305352			YDL163W	#DIV/0!		YDR080W	2979		YDR148C	2.40414
YDR473C	0.10824		YER140W	0.305415			YDL164C	3.18035		YDR081C	2778		YDR151C	0.387889
YDR475C	-0.884807		YPL189W	0.305438			YDL165W	6.18761		YDR082W	1485		YDR152W	0.530075
YDR476C	0.489838		YMR087W	0.305475			YDL166C	4.21326		YDR083W	1179		YDR153C	0.68762
YDR479C	-0.429953		YGL109W	0.305491			YDL167C	1.78886		YDR084C	600		YDR155C	8.58251
YDR481C	0.128919		YBR270C	0.305524			YDL168W	8.82789		YDR085C	1863		YDR156W	0.240036
YDR482C	0.20765		YGR015C	0.305561			YDL169C	#DIV/0!		YDR086C	243		YDR158W	2.58772
YDR485C	-0.166809		YOR225W	0.305574			YDL170W	2.50363		YDR087C	837		YDR159W	0.313353
YDR486C	0.968559		YPR003C	0.305631			YDL171C	5.55185		YDR088C	1149		YDR160W	0.376944
YDR487C	0.86356		YHR002W	0.305636			YDL172C	#DIV/0!		YDR089W	2610		YDR161W	0.425584
YDR488C	-1.05194		YFL003C	0.305639			YDL173W	4.2058		YDR090C	933		YDR162C	0.413474
YDR490C	-0.452938		YGL096W	0.305661			YDL174C	6.61953		YDR091C	1827		YDR163W	0.389674
YDR495C	-0.819926		YMR204C	0.305667			YDL175C	2.28984		YDR092W	730		YDR164C	0.57699
YDR496C	0.64121		YNL304W	0.305672			YDL176W	1.62757		YDR093W	4839		YDR165W	0.381632
YDR497C	-0.233303		YDL241W	0.305698			YDL177C	2.06269		YDR096W	2685		YDR166C	0.546586
YDR498C	-0.0964183		YNL269W	0.305702			YDL178W	5.36864		YDR097C	3729		YDR167W	0.563594
YDR500C	0.989761		YDL216C	0.305703			YDL179W	1.49017		YDR098C	858		YDR168W	0.943362
YDR502C	0.704044		YNL199C	0.305747			YDL180W	3.70881		YDR099W	822		YDR169C	0.607427
YDR503C	0.202252		YNL276C	0.305837			YDL181W	6.78594		YDR100W	432		YDR169C-A	0.037557
YDR504C	-5.15392		YOR161W-A	0.305858			YDL182W	5.98702		YDR101C	1782		YDR170C	0.707829
YDR505C	-0.456755		YDR281C	0.305888			YDL183C	1.24622		YDR103W	2754		YDR171W	3.44859
YDR506C	-0.829668		YLR437C	0.305938			YDL184C	11.8449		YDR104C	3738		YDR172W	1.50735
YDR507C	-1.08016e-05		YPL172C	0.305981			YDL185C-A	11.471		YDR105C	1422		YDR173C	0.343058
YDR508C	0.0501038		YHR067W	0.305989			YDL185W	14.0577		YDR106W	855		YDR174W	1.00746
YDR512C	0.364965		YDR344C	0.305997			YDL186W	1.23551		YDR107C	2019		YDR175C	0.607593
YDR514C	0.478281		YNL305C	0.306004			YDL187C	#DIV/0!		YDR108W	2097		YDR176W	0.598312
YDR516C	0.79821		YML068W	0.306036			YDL188C	6.2282		YDR109C	2148		YDR177W	1.03371
YDR520C	-0.56299		YBL083C	0.306049			YDL189W	2.82903		YDR110W	1701		YDR178W	1.94162
YDR523C	-1.31868		YMR127C	0.30608			YDL190C	4.2622		YDR111C	1524		YDR179C	0.271311
YDR524C	-1.32754		YIR025W	0.306084			YDL191W	17.3334		YDR113C	1122		YDR179W-A	0.254435
YDR524C-B	0.731697		YOR258W	0.306137			YDL192W	15.831		YDR115W	318		YDR180W	0.246168
YDR524C-A	-1.5192		YJL134W	0.306153			YDL193W	4.53535		YDR116C	858		YDR181C	0.415822
YDR529C	1.16142		YGR041W	0.306162			YDL194W	2.30118		YDR117C	1698		YDR182W	0.632964
YDR530C	0.289022		YJR112W	0.306199			YDL195W	6.54285		YDR118W	1959		YDR183W	0.254327
YDR532C	0.0630802		YDR420W	0.306222			YDL196W	#DIV/0!		YDR119W	2307		YDR184C	0.225563
YDR533C	0.714116		YGL085W	0.306233			YDL197C	4.94068		YDR119W-A	201		YDR185C	0.116277
YDR534C	-4.59365		YFR009W-A	0.306244			YDL198C	8.453		YDR120C	1713		YDR186C	1.34759
YDR535C	-6.21133		YLR414C	0.306369			YDL199C	3.95179		YDR121W	591		YDR188W	1.84407
YDR540C	-0.0634703		YPR169W-A	0.306372			YDL200C	6.57407		YDR122W	3195		YDR189W	0.761687
YDR541C	-1.3647		YDR282C	0.306393			YDL201W	4.13877		YDR123C	915		YDR190C	0.924976
YDL248W	0.301799		YCL034W	0.306394			YDL202W	3.9726		YDR124W	975		YDR191W	0.159329
YDL244W	-0.102063		YDR112W	0.306419			YDL203C	2.36003		YDR125C	1362		YDR192C	0.291881
YDL242W	-3.02994		YFR027W	0.306527			YDL204W	#DIV/0!		YDR126W	1011		YDR194C	1.10631
YDL241W	0.931775		YBR184W	0.306534			YDL205C	3.87171		YDR127W	4767		YDR195W	0.467882
YDL240W	-1.25473		YJR030C	0.306588			YDL206W	2.50091		YDR128W	3447		YDR196C	0.570267
YDL237W	0.206233		YHR073C-B	0.306621			YDL207W	3.91741		YDR129C	2040		YDR197W	0.340318
YDL236W	0.915814		YOR202W	0.306645			YDL208W	4.77107		YDR130C	876		YDR198C	0.290478
YDL233W	0.107095		YIR021W	0.306697			YDL209C	1.28408		YDR131C	1671		YDR200C	0.401026
YDL232W	-0.78432		YOL166W-A	0.306752			YDL210W	3.41996		YDR132C	1488		YDR201W	0.280811
YDL230W	0.3519		YNL148C	0.306764			YDL211C	1.22739		YDR133C	336		YDR202C	0.526841
YDL229W	0.413698		YKL208W	0.306785			YDL212W	6.7582		YDR135C	4548		YDR204W	0.542249
YDL225W	0.688455		YOL164W-A	0.30679			YDL213C	7.16586		YDR137W	1992		YDR205W	0.380703
YDL221W	-4.83878		YOL044W	0.306792			YDL214C	#DIV/0!		YDR138W	2259		YDR206W	0.623658
YDL219W	0.346085		YNR001W-A	0.306798			YDL215C	5.52596		YDR139C	307		YDR207C	0.461224
YDL218W	-1.72915		YLR467W	0.306814			YDL216C	5.24926		YDR140W	666		YDR208W	0.680816
YDL212W	0.685641		YOR396W	0.306814			YDL217C	4.59531		YDR141C	5097		YDR211W	0.712602
YDL210W	-0.985521		YDR545W	0.306814			YDL218W	6.19307		YDR142C	1128		YDR212W	1.10968
YDL208W	0.823966		YEL074W	0.306906			YDL219W	9.80617		YDR143C	1833		YDR213W	0.308915
YDL207W	-0.471582		YDR179C	0.306915			YDL220C	2.886		YDR144C	1791		YDR214W	2.49665
YDL206W	-2.03393		YMR286W	0.306945			YDL221W	4.76823		YDR145W	1620		YDR216W	0.985264
YDL204W	-1.32637		YDR524C-A	0.306986			YDL222C	#DIV/0!		YDR146C	2130		YDR217C	0.395148
YDL202W	0.736117		YNL140C	0.307035			YDL223C	7.78256		YDR147W	1605		YDR218C	0.22633
YDL201W	0.891866		YJL163C	0.30706			YDL224C	1.97287		YDR148C	1392		YDR219C	0.427822
YDL195W	-0.0175109		YNR077C	0.307064			YDL225W	3.97714		YDR150W	8247		YDR221W	0.479297
YDL194W	-1.83164		YDR319C	0.307085			YDL226C	7.18239		YDR151C	978		YDR222W	0.430309
YDL193W	0.511033		YOR070C	0.307108			YDL228C	13.1124		YDR152W	798		YDR223W	0.573084
YDL192W	0.595984		YOR376W	0.307203			YDL229W	12.7124		YDR153C	1236		YDR224C	3.5547
YDL191W	0.838308		YOR044W	0.307204			YDL230W	4.32702		YDR158W	1098		YDR225W	2.89751
YDL189W	-0.272804		YHR085W	0.307213			YDL231C	3.15332		YDR159W	3906		YDR226W	1.98623
YDL185W	0.43449		YBR134W	0.30729			YDL232W	#DIV/0!		YDR160W	2559		YDR227W	0.52761
YDL182W	0.64489		YAL064W-B	0.307298			YDL233W	2.99253		YDR161W	1164		YDR228C	0.440124
YDL181W	1.07309		YCL068C	0.307393			YDL234C	3.36241		YDR162C	711		YDR229W	0.433786
YDL180W	-0.421561		YPL003W	0.30743			YDL235C	5.34059		YDR163W	528		YDR231C	0.795806
YDL179W	0.35211		YPL248C	0.307445			YDL236W	6.73025		YDR164C	2175		YDR232W	0.665395
YDL178W	0.29416		YMR013C	0.307471			YDL237W	7.43166		YDR165W	1335		YDR233C	2.71711
YDL176W	-1.64048		YPR134W	0.307503			YDL238C	6.17438		YDR166C	2916		YDR234W	1.69008
YDL173W	0.524319		YHR166C	0.307508			YDL239C	#DIV/0!		YDR167W	621		YDR235W	0.32191
YDL170W	-0.711086		YAL056W	0.307523			YDL240C-A	#DIV/0!		YDR168W	1521		YDR236C	0.371712
YDL168W	1.02044		YGR259C	0.307561			YDL240W	1.14933		YDR169C	1542		YDR237W	0.612503
YDL165W	1.00981		YMR163C	0.307565			YDL241W	4.89144		YDR170C	6030		YDR238C	1.0969
YDL161W	0.569848		YPL200W	0.307591			YDL242W	#DIV/0!		YDR171W	1128		YDR239C	0.345666
YDL159W	-0.0268948		YBR228W	0.307594			YDL244W	#DIV/0!		YDR172W	2058		YDR240C	0.228645
YDL156W	-0.14356		YMR193C-A	0.30762			YDR001C	6.76378		YDR173C	1068		YDR242W	0.371972
YDL155W	-0.598326		YBR297W	0.307667			YDR002W	17.7595		YDR174W	741		YDR243C	0.210581
YDL154W	-4.05902		YPR203W	0.307702			YDR003W	5.16076		YDR175C	960		YDR244W	0.610543
YDL150W	0.444313		YBL039C-A	0.307719			YDR003W-A	1.64982		YDR176W	2109		YDR245W	0.840198
YDL149W	-0.665738		YDR142C	0.307774			YDR004W	4.40131		YDR177W	648		YDR246W	0.479483
YDL147W	0.62425		YJL007C	0.307777			YDR005C	2.29367		YDR178W	546		YDR247W	0.437257
YDL146W	-0.873742		YAR031W	0.307795			YDR006C	1.71795		YDR179C	489		YDR248C	0.496741
YDL143W	0.424348		YGL152C	0.30789			YDR007W	#DIV/0!		YDR179W-A	1392		YDR249C	0.148972
YDL141W	-0.474611		YML054C-A	0.307914			YDR008C	3.53504		YDR180W	4482		YDR251W	0.698206
YDL138W	-2.32942		YGR288W	0.307929			YDR009W	#DIV/0!		YDR181C	1446		YDR252W	0.126081
YDL137W	0.743686		YOL024W	0.30796			YDR010C	#DIV/0!		YDR182W	1476		YDR253C	0.438835
YDL136W	0.910874		YDR167W	0.307964			YDR011W	5.98718		YDR183W	693		YDR254W	0.345031
YDL133W	-1.16213		YPL157W	0.307979			YDR012W	9.38457		YDR185C	540		YDR255C	0.359298
YDL132W	-0.17818		YBL065W	0.307992			YDR013W	4.03776		YDR186C	2634		YDR256C	2.81598
YDL131W	0.703469		YAL004W	0.308027			YDR014W	1.87402		YDR188W	1641		YDR257C	0.29869
YDL130W-A	1.00445		YHR129C	0.308031			YDR014W-A	#DIV/0!		YDR189W	2001		YDR258C	3.26084
YDL130W	1.27492		YER165C-A	0.308041			YDR015C	#DIV/0!		YDR190C	1392		YDR259C	0.162843
YDL129W	-0.243573		YER088W-B	0.308064			YDR016C	5.20866		YDR191W	1113		YDR260C	0.355242
YDL128W	0.597246		YPL185W	0.308066			YDR017C	1.47443		YDR192C	1293		YDR261C	0.262693
YDL127W	-0.256072		YPR174C	0.308067			YDR018C	#DIV/0!		YDR194C	1995		YDR262W	1.54955
YDL124W	0.513606		YIL029C	0.308074			YDR019C	5.80648		YDR195W	1602		YDR263C	0.209068
YDL123W	-0.512883		YPR054W	0.308076			YDR020C	3.02477		YDR196C	726		YDR264C	0.856175
YDL122W	-0.294621		YOL014W	0.308086			YDR021W	1.57189		YDR197W	1170		YDR265W	0.345239
YDL120W	0.359051		YHR069C-A	0.308134			YDR022C	6.97944		YDR198C	1440		YDR266C	0.386259
YDL117W	-0.858846		YLR242C	0.308176			YDR023W	11.1864		YDR200C	1815		YDR267C	0.326581
YDL116W	-0.146864		YER173W	0.308203			YDR024W	#DIV/0!		YDR201W	498		YDR268W	0.23121
YDL112W	-0.51017		YDL119C	0.308231			YDR025W	13.2294		YDR202C	1056		YDR270W	0.495713
YDL108W	0.349359		YPR177C	0.308246			YDR026C	2.53038		YDR204W	1008		YDR272W	0.910323
YDL107W	0.12914		YGR269W	0.308274			YDR027C	2.40631		YDR205W	2175		YDR273W	0.130783
YDL105W	-0.283315		YGR265W	0.308544			YDR028C	4.07883		YDR206W	2655		YDR275W	0.929065
YDL102W	-0.145236		YMR071C	0.308564			YDR029W	3.51443		YDR207C	2511		YDR276C	2.53622
YDL099W	0.609359		YLL066C	0.30862			YDR030C	2.35597		YDR208W	2340		YDR277C	0.69867
YDL095W	0.301917		YDR173C	0.308624			YDR031W	6.64783		YDR210W	228		YDR279W	0.34271
YDL093W	-0.235534		YNL024C-A	0.308656			YDR032C	27.0804		YDR211W	2139		YDR280W	0.415846
YDL092W	0.409701		YDL180W	0.308664			YDR033W	6.24714		YDR212W	1680		YDR281C	0.048534
YDL089W	-0.270507		YLR394W	0.308678			YDR034C	1.79335		YDR213W	2742		YDR282C	0.326256
YDL086W	0.61152		YBR240C	0.308681			YDR034C-A	6.50937		YDR214W	1053		YDR283C	0.403641
YDL085W	-0.39878		YMR119W-A	0.308684			YDR034W-B	#DIV/0!		YDR215C	414		YDR284C	0.558325
YDL084W	0.379442		YOR378W	0.308696			YDR035W	8.38012		YDR216W	3972		YDR285W	0.219706
YDL082W	1.11955		YPL075W	0.3087			YDR036C	8.07663		YDR217C	3930		YDR286C	0.263817
YDL075W	0.977671		YPL238C	0.308722			YDR037W	10.8925		YDR218C	1272		YDR287W	0.489511
YDL073W	-1.83984		YPL257W	0.308759			YDR041W	5.57043		YDR219C	1398		YDR288W	0.282114
YDL070W	-0.662946		YOR008C	0.308763			YDR042C	#DIV/0!		YDR221W	2109		YDR289C	0.386623
YDL066W	0.57337		YMR209C	0.308765			YDR043C	2.23391		YDR222W	1248		YDR291W	0.325484
YDL064W	0.579309		YCR096C	0.308824			YDR044W	5.17287		YDR223W	1404		YDR292C	0.763624
YDL060W	0.0953225		YFR003C	0.308836			YDR045C	4.26224		YDR224C	396		YDR293C	1.7222
YDL058W	-0.705437		YLR456W	0.308839			YDR046C	2.54251		YDR225W	399		YDR294C	1.12701
YDL057W	0.422347		YDR455C	0.308855			YDR047W	5.26464		YDR226W	669		YDR295C	0.388155
YDL056W	-0.377971		YMR153C-A	0.308874			YDR048C	#DIV/0!		YDR227W	4077		YDR296W	0.625977
YDL051W	0.531487		YBR276C	0.308879			YDR049W	2.70586		YDR228C	1881		YDR297W	0.634251
YDL046W	0.563695		YDR476C	0.308931			YDR050C	14.748		YDR229W	1362		YDR298C	1.97967
YDL045W-A	0.851119		YJL100W	0.308947			YDR051C	4.27678		YDR231C	618		YDR299W	0.435306
YDL031W	0.0393265		YJR086W	0.308947			YDR052C	1.81517		YDR232W	1647		YDR300C	0.46448
YDL030W	0.0317207		YHR132W-A	0.308953			YDR053W	1.52094		YDR233C	888		YDR301W	0.284991
YDL029W	0.54244		YMR026C	0.308972			YDR054C	3.96608		YDR234W	2082		YDR302W	0.299192
YDL022W	1.04096		YDR338C	0.309031			YDR055W	3.26924		YDR235W	1635		YDR303C	0.45296
YDL021W	0.984897		YGR204C-A	0.309082			YDR056C	6.92207		YDR236C	657		YDR304C	0.87987
YDL017W	0.352341		YBL048W	0.309099			YDR057W	3.55037		YDR237W	879		YDR305C	0.379213
YDL014W	0.98363		YKL185W	0.309131			YDR058C	2.30925		YDR238C	2922		YDR306C	0.396061
YDL013W	-0.426091		YGR296W	0.309168			YDR059C	17.8032		YDR239C	2364		YDR307W	0.53252
YDL010W	1.04687		YPL283C	0.309168			YDR060W	3.6802		YDR240C	1479		YDR308C	0.313795
YDL008W	0.674195		YNL339C	0.309203			YDR061W	4.45906		YDR241W	288		YDR309C	0.42909
YDL007W	0.99487		YPL135C-A	0.309221			YDR062W	5.39012		YDR242W	1650		YDR310C	0.79016
YDL006W	0.273648		YNL275W	0.309239			YDR063W	6.79054		YDR243C	1767		YDR311W	0.323428
YDL004W	0.625931		YBL089W	0.309261			YDR064W	22.1625		YDR244W	1839		YDR312W	0.428688
YDL003W	0.350782		YGR249W	0.309284			YDR065W	2.40338		YDR245W	1182		YDR313C	0.646847
YDL001W	0.283215		YMR094W	0.309314			YDR066C	2.85105		YDR246W	660		YDR314C	0.21956
YDR002W	0.935408		YNL089C	0.309363			YDR067C	3.7357		YDR247W	1386		YDR315C	0.197647
YDR003W-A	-4.4323		YIR020C	0.309391			YDR068W	5.2653		YDR248C	582		YDR316W	0.469634
YDR004W	-1.36135		YGL212W	0.309411			YDR069C	2.17847		YDR249C	1122		YDR317W	0.206362
YDR007W	-2.15918		YER163C	0.309411			YDR070C	#DIV/0!		YDR251W	2493		YDR318W	0.299933
YDR009W	-1.2152		YGL179C	0.309426			YDR071C	8.25236		YDR252W	450		YDR319C	0.459109
YDR011W	-0.867984		YGR174W-A	0.309428			YDR072C	2.00831		YDR253C	576		YDR320C	0.353938
YDR012W	0.913369		YHL037C	0.309458			YDR073W	2.58049		YDR254W	1377		YDR320C-A	0.425585
YDR013W	0.28398		YIL067C	0.309493			YDR074W	6.48684		YDR255C	1266		YDR321W	0.43268
YDR014W	-0.716472		YBR271W	0.309537			YDR075W	1.64079		YDR256C	1548		YDR322C-A	1.23295
YDR014W-A	-0.00264402		YCR086W	0.309552			YDR076W	1.62105		YDR257C	1485		YDR322W	0.600799
YDR021W	0.517492		YDR313C	0.309553			YDR077W	9.97943		YDR258C	2436		YDR323C	0.2423
YDR023W	0.669293		YDL080C	0.309619			YDR078C	4.49908		YDR259C	1152		YDR324C	0.578337
YDR024W	-3.8771		YLR246W	0.30964			YDR079C-A	5.80663		YDR260C	513		YDR325W	0.403626
YDR025W	0.89931		YIL163C	0.309652			YDR079W	4.90584		YDR261C	1689		YDR326C	0.369069
YDR031W	0.72144		YNL317W	0.309654			YDR080W	2.58825		YDR262W	819		YDR328C	1.11593
YDR033W	0.345508		YOR228C	0.309666			YDR081C	1.80563		YDR263C	1293		YDR329C	0.883392
YDR034W-B	1.17275		YNR010W	0.309677			YDR082W	1.92948		YDR264C	2295		YDR330W	0.69787
YDR035W	0.752408		YPR123C	0.309688			YDR083W	4.50219		YDR265W	1014		YDR331W	0.357571
YDR037W	0.627131		YDR462W	0.309726			YDR084C	5.834		YDR266C	1920		YDR332W	0.347577
YDR041W	0.460533		YFL065C	0.309747			YDR085C	4.37619		YDR267C	993		YDR333C	0.464769
YDR044W	0.621606		YDR374W-A	0.309775			YDR086C	9.28152		YDR268W	1140		YDR334W	0.396284
YDR047W	0.254188		YLR062C	0.309785			YDR087C	3.85824		YDR270W	3015		YDR335W	0.802073
YDR049W	0.030541		YLR288C	0.309786			YDR088C	2.51863		YDR271C	372		YDR336W	0.238445
YDR055W	0.701979		YDL211C	0.30984			YDR089W	2.74168		YDR272W	825		YDR337W	0.536811
YDR057W	0.381708		YLR006C	0.309864			YDR090C	2.87528		YDR273W	1098		YDR338C	0.327334
YDR060W	-0.20084		YJR036C	0.309891			YDR091C	4.0961		YDR274C	372		YDR339C	0.467435
YDR061W	0.109236		YLL063C	0.309909			YDR092W	8.20449		YDR275W	708		YDR341C	1.41847
YDR062W	-0.288549		YEL014C	0.309996			YDR093W	3.41251		YDR276C	168		YDR345C	0.567524
YDR063W	0.670745		YER066C-A	0.310063			YDR094W	4.46812		YDR277C	1302		YDR346C	1.07136
YDR064W	0.996479		YNL170W	0.310077			YDR095C	#DIV/0!		YDR279W	1053		YDR347W	0.624898
YDR065W	-1.10811		YBR065C	0.310163			YDR096W	3.07882		YDR280W	918		YDR348C	0.644377
YDR068W	0.676354		YDL090C	0.310182			YDR097C	4.11		YDR281C	315		YDR349C	0.728247
YDR073W	-0.37776		YDR423C	0.310245			YDR098C	10.2143		YDR282C	1245		YDR350C	0.468084
YDR074W	0.0401422		YDR352W	0.310314			YDR099W	9.49415		YDR283C	4980		YDR351W	0.536976
YDR075W	-0.168005		YPR178W	0.310344			YDR100W	6.10329		YDR284C	870		YDR352W	0.382121
YDR076W	-1.13444		YGL254W	0.310424			YDR101C	3.59122		YDR285W	2628		YDR353W	1.06577
YDR077W	1.06548		YGR221C	0.310462			YDR102C	#DIV/0!		YDR286C	345		YDR354W	0.978825
YDR079W	1.11165		YKL132C	0.310506			YDR103W	1.9271		YDR287W	879		YDR356W	0.344574
YDR080W	-0.104983		YGR228W	0.310593			YDR104C	1.33194		YDR288W	912		YDR357C	0.683336
YDR082W	-2.98514		YLR443W	0.310628			YDR105C	3.31748		YDR289C	1230		YDR358W	0.609373
YDR083W	0.40693		YPL034W	0.310655			YDR106W	#DIV/0!		YDR291W	3234		YDR359C	0.602297
YDR089W	-0.34493		YGL155W	0.310665			YDR107C	5.28776		YDR292C	1866		YDR361C	0.448637
YDR092W	1.33632		YHL025W	0.310667			YDR108W	2.30495		YDR293C	3753		YDR362C	0.43213
YDR093W	-1.15109		YKL218C	0.310715			YDR109C	1.67332		YDR294C	1770		YDR363W	0.263979
YDR096W	-0.547782		YFL031W	0.310737			YDR110W	1.97375		YDR295C	2025		YDR363W-A	0.986226
YDR099W	0.836838		YBR201W	0.310756			YDR111C	3.7248		YDR296W	681		YDR364C	0.307803
YDR100W	0.97588		YJR135C	0.310763			YDR112W	3.8103		YDR297W	1050		YDR365C	1.74467
YDR103W	-0.465115		YGR216C	0.310771			YDR113C	3.11321		YDR298C	639		YDR367W	0.351006
YDR106W	0.667474		YDR220C	0.310817			YDR114C	#DIV/0!		YDR299W	1605		YDR368W	0.565467
YDR108W	-0.65525		YOL131W	0.310839			YDR115W	7.31824		YDR300C	1287		YDR369C	0.268337
YDR110W	-0.257371		YCL058C	0.310847			YDR116C	5.11875		YDR301W	4074		YDR370C	0.351895
YDR115W	0.684599		YMR236W	0.310878			YDR117C	3.38594		YDR302W	660		YDR371W	0.341191
YDR118W	-0.45075		YDR076W	0.310903			YDR118W	2.02875		YDR303C	2658		YDR372C	0.721331
YDR119W	-0.165524		YNL076W	0.310912			YDR118W-A	#DIV/0!		YDR304C	678		YDR373W	0.557722
YDR119W-A	0.828181		YHR050W	0.310956			YDR119W	3.86112		YDR305C	743		YDR374C	0.0538887
YDR121W	0.913223		YOL036W	0.310967			YDR119W-A	1.10946		YDR306C	1437		YDR374W-A	0.319035
YDR122W	-0.800157		YFR054C	0.311013			YDR120C	4.21868		YDR307W	1989		YDR375C	0.534413
YDR124W	-2.17144		YML023C	0.311014			YDR121W	3.10996		YDR308C	423		YDR376W	0.383389
YDR126W	-0.373606		YAL047W-A	0.311038			YDR122W	3.18932		YDR309C	1152		YDR377W	1.77641
YDR127W	-0.152756		YGR016W	0.311064			YDR123C	1.27618		YDR310C	3189		YDR378C	0.432798
YDR128W	-1.75913		YJR013W	0.311106			YDR124W	2.28942		YDR311W	1929		YDR379C-A	0.428538
YDR137W	-0.498478		YGR291C	0.311161			YDR125C	3.13868		YDR312W	1362		YDR379W	0.537257
YDR138W	-0.481608		YER144C	0.311165			YDR126W	2.27547		YDR313C	861		YDR380W	1.05094
YDR140W	-0.0260787		YDL220C	0.311207			YDR127W	7.15252		YDR314C	2079		YDR381C-A	0.367226
YDR145W	0.158436		YOR314W	0.31121			YDR128W	4.06398		YDR315C	846		YDR382W	2.20974
YDR147W	-0.148985		YIL117C	0.311234			YDR129C	10.21		YDR316W	1416		YDR383C	0.217372
YDR150W	-0.452603		YLR316C	0.311337			YDR130C	2.95536		YDR317W	1245		YDR384C	3.6915
YDR152W	0.451492		YOR127W	0.31136			YDR131C	3.05145		YDR318W	1190		YDR385W	8.54971
YDR158W	0.720822		YIR005W	0.311391			YDR132C	3.71506		YDR319C	825		YDR386W	0.284671
YDR159W	-1.42652		YBR194W	0.311396			YDR133C	2.66313		YDR320C	2007		YDR387C	0.369222
YDR160W	-1.97581		YIL025C	0.311397			YDR134C	4.26007		YDR320C-A	219		YDR389W	0.4936
YDR161W	0.564933		YKR004C	0.311467			YDR135C	6.32359		YDR320W-B	138		YDR390C	0.558686
YDR163W	1.15504		YJL077W-B	0.311478			YDR136C	#DIV/0!		YDR321W	1146		YDR391C	0.261034
YDR165W	0.329084		YCL027W	0.311487			YDR137W	2.65646		YDR322C-A	291		YDR392W	0.440412
YDR167W	0.886609		YKL168C	0.311525			YDR138W	1.81214		YDR322W	1104		YDR393W	0.342162
YDR168W	0.909447		YKR091W	0.311541			YDR139C	10.9992		YDR323C	1548		YDR394W	1.65409
YDR171W	0.6339		YKL116C	0.311544			YDR140W	6.26795		YDR324C	2331		YDR395W	0.600537
YDR172W	0.649967		YHR177W	0.311548			YDR141C	3.52359		YDR325W	3108		YDR397C	0.586806
YDR174W	0.485812		YER088C-A	0.311594			YDR142C	2.71892		YDR326C	4317		YDR398W	0.50284
YDR176W	-0.279801		YLR337C	0.311637			YDR143C	1.87635		YDR328C	585		YDR399W	2.05539
YDR177W	1.4658		YLR286W-A	0.311642			YDR144C	3.64269		YDR329C	1326		YDR400W	0.256073
YDR178W	0.490622		YJL210W	0.311715			YDR145W	4.5585		YDR330W	1503		YDR402C	0.142894
YDR179W-A	-0.85699		YER040W	0.311735			YDR146C	1.58864		YDR331W	1236		YDR403W	0.131034
YDR180W	-0.818963		YML096W	0.311855			YDR147W	2.82051		YDR332W	2070		YDR404C	0.329979
YDR182W	0.371101		YDL129W	0.31187			YDR148C	9.61722		YDR333C	2172		YDR405W	0.830562
YDR183W	0.774384		YER113C	0.311948			YDR149C	2.80236		YDR334W	4545		YDR406W	0.496569
YDR188W	0.399244		YLR334C	0.312001			YDR151C	2.77028		YDR335W	3675		YDR407C	0.388438
YDR189W	0.225459		YGR257C	0.312061			YDR152W	4.41652		YDR336W	945		YDR408C	0.495779
YDR191W	0.942449		YDR197W	0.312086			YDR153C	2.28394		YDR337W	861		YDR409W	0.418971
YDR195W	0.298825		YGR023W	0.312107			YDR154C	30.7999		YDR338C	2088		YDR410C	0.233738
YDR197W	-0.887688		YDR260C	0.312108			YDR155C	26.5039		YDR339C	570		YDR411C	0.639963
YDR201W	0.488598		YBR292C	0.312197			YDR156W	3.68245		YDR341C	1824		YDR412W	0.388126
YDR204W	0.201727		YOL128C	0.312212			YDR157W	3.92603		YDR342C	1713		YDR414C	0.334216
YDR205W	-0.325404		YOL112W	0.312233			YDR158W	18.236		YDR343C	1713		YDR415C	0.342485
YDR206W	-1.11969		YLL067C	0.312277			YDR159W	1.35947		YDR345C	1704		YDR416W	0.297805
YDR208W	-0.739099		YPR009W	0.312282			YDR160W	2.40168		YDR346C	1446		YDR419W	0.362685
YDR210W	0.844255		YJL099W	0.312363			YDR161W	5.41202		YDR347W	966		YDR420W	0.401109
YDR211W	-0.0999793		YLR224W	0.312367			YDR162C	3.4621		YDR348C	1500		YDR421W	0.366256
YDR212W	0.534953		YOL026C	0.312408			YDR163W	4.89669		YDR349C	1791		YDR422C	0.485508
YDR213W	-0.498283		YAL010C	0.312437			YDR164C	4.50224		YDR350C	2055		YDR423C	0.376642
YDR214W	0.623159		YDL186W	0.312465			YDR165W	4.25391		YDR351W	2595		YDR424C	0.386948
YDR216W	-2.40677		YEL077C	0.312478			YDR166C	2.69942		YDR352W	954		YDR425W	0.357681
YDR221W	-0.287106		YIL046W	0.312488			YDR167W	6.07866		YDR353W	960		YDR427W	1.32424
YDR222W	0.200606		YPL241C	0.3125			YDR168W	6.93167		YDR354W	1143		YDR428C	0.302979
YDR223W	-1.31278		YOR385W	0.312508			YDR169C	3.21895		YDR356W	2835		YDR429C	1.07944
YDR225W	0.929957		YIL156W-A	0.312532			YDR169C-A	#DIV/0!		YDR357C	369		YDR430C	0.65199
YDR226W	1.01716		YDL189W	0.312637			YDR170C	6.88622		YDR358W	1674		YDR432W	1.17591
YDR227W	-1.15684		YJR162C	0.312644			YDR170W-A	6.1691		YDR359C	2949		YDR434W	0.636178
YDR229W	0.450955		YKR051W	0.312644			YDR171W	5.57684		YDR361C	852		YDR435C	0.384754
YDR232W	-0.0804801		YPL230W	0.312654			YDR172W	4.75082		YDR362C	2019		YDR436W	0.499771
YDR234W	0.257965		YAL034W-A	0.312718			YDR173C	1.94315		YDR363W	1371		YDR437W	0.10417
YDR235W	-0.235707		YDR340W	0.312724			YDR174W	12.5459		YDR363W-A	270		YDR438W	0.307071
YDR237W	0.470088		YPL055C	0.31275			YDR175C	4.01136		YDR364C	1368		YDR439W	0.24648
YDR241W	-4.27455		YBR058C-A	0.312802			YDR176W	3.06333		YDR365C	1887		YDR440W	0.293541
YDR242W	-1.72654		YOL113W	0.31282			YDR177W	5.56463		YDR366C	399		YDR441C	0.56956
YDR244W	0.113254		YDL096C	0.312832			YDR178W	6.85131		YDR367W	767		YDR443C	0.358539
YDR245W	-0.220436		YCR019W	0.312851			YDR179C	1.47325		YDR368W	939		YDR444W	0.334179
YDR246W	0.353868		YIL177C	0.312891			YDR179W-A	2.29377		YDR369C	2565		YDR446W	0.0251363
YDR247W	-0.823575		YOR376W-A	0.312899			YDR180W	0.769956		YDR370C	1329		YDR447C	2.19115
YDR251W	-0.709457		YOR037W	0.312902			YDR181C	1.8755		YDR371W	1536		YDR448W	0.100139
YDR252W	-0.142245		YJR050W	0.312929			YDR182W	4.32296		YDR372C	1038		YDR449C	0.324078
YDR254W	-0.818555		YKL118W	0.312945			YDR182W-A	#DIV/0!		YDR374W-A	270		YDR450W	2.83991
YDR262W	0.296483		YER115C	0.312993			YDR183C-A	1.96406		YDR375C	1371		YDR451C	0.325775
YDR265W	-0.542835		YIL089W	0.313014			YDR183W	3.99328		YDR376W	1482		YDR452W	1.09988
YDR268W	0.1932		YCL010C	0.313022			YDR184C	1.53422		YDR377W	306		YDR453C	0.760395
YDR270W	-0.660805		YLR046C	0.313052			YDR185C	2.83745		YDR378C	261		YDR454C	0.82963
YDR272W	1.06491		YMR135W-A	0.313057			YDR186C	1.75188		YDR379C-A	240		YDR456W	0.684577
YDR273W	-1.12715		YMR272W-A	0.313073			YDR187C	2.84976		YDR379W	3030		YDR457W	0.551439
YDR275W	-2.10039		YBR182C-A	0.313084			YDR188W	4.82123		YDR380W	1908		YDR458C	0.603157
YDR279W	-0.135021		YJL225C	0.313108			YDR189W	4.30447		YDR381C-A	539		YDR459C	0.375484
YDR280W	0.489077		YOR179C	0.313108			YDR190C	4.47143		YDR381W	1447		YDR460W	0.376623
YDR285W	-1.75309		YIL055C	0.313121			YDR191W	0.906157		YDR382W	333		YDR461C-A	0.355723
YDR287W	0.444713		YOR193W	0.313201			YDR192C	2.9168		YDR383C	717		YDR461W	0.766551
YDR288W	-0.747816		YIL106W	0.313264			YDR193W	3.18539		YDR384C	828		YDR462W	0.483737
YDR291W	-1.25832		YGR068C	0.313275			YDR194C	5.32956		YDR385W	2529		YDR463W	0.940593
YDR296W	1.17592		YHR014W	0.3133			YDR194W-A	#DIV/0!		YDR386W	1899		YDR464W	0.457553
YDR297W	0.367589		YDR445C	0.313324			YDR195W	1.66386		YDR387C	1668		YDR465C	0.601101
YDR299W	0.467071		YAR003W	0.31336			YDR196C	5.69165		YDR388W	1449		YDR466W	0.524368
YDR301W	-0.947237		YIL071C	0.313413			YDR197W	2.70465		YDR389W	1965		YDR468C	0.499822
YDR302W	0.745959		YOR107W	0.313414			YDR198C	2.67263		YDR390C	1911		YDR469W	0.359944
YDR307W	0.436858		YDR193W	0.313444			YDR199W	3.63858		YDR391C	699		YDR470C	0.500988
YDR311W	-0.125706		YLR191W	0.31345			YDR200C	2.6489		YDR392W	1014		YDR472W	0.330814
YDR312W	0.507791		YDR409W	0.313454			YDR201W	4.82296		YDR393W	1371		YDR473C	0.359388
YDR316W	0.122471		YOR121C	0.313518			YDR202C	4.26516		YDR394W	1287		YDR475C	0.505819
YDR317W	-0.0553589		YLR154W-C	0.313569			YDR203W	3.54358		YDR395W	2835		YDR476C	0.458285
YDR318W	-0.228372		YER107C	0.313582			YDR204W	6.57033		YDR396W	501		YDR477W	0.928986
YDR321W	0.478957		YNR059W	0.313602			YDR205W	2.57349		YDR397C	533		YDR478W	0.167753
YDR322W	0.451998		YHR151C	0.313632			YDR206W	3.15062		YDR398W	1932		YDR479C	0.570761
YDR325W	-0.892825		YLR173W	0.313632			YDR207C	2.72735		YDR399W	666		YDR480W	0.295518
YDR330W	0.171495		YMR251W	0.313652			YDR208W	1.97627		YDR401W	564		YDR481C	0.947643
YDR331W	0.163388		YPR017C	0.313657			YDR209C	7.83945		YDR402C	1470		YDR482C	0.221433
YDR332W	-1.47758		YIL037C	0.313658			YDR210W	11.0823		YDR403W	1611		YDR483W	1.3523
YDR334W	-2.35529		YPL033C	0.31366			YDR211W	4.90224		YDR404C	516		YDR484W	0.310693
YDR335W	-0.752571		YBR223C	0.313669			YDR212W	7.37248		YDR405W	792		YDR485C	0.558465
YDR336W	-0.848717		YPL049C	0.313753			YDR213W	1.78303		YDR406W	4590		YDR486C	0.565492
YDR337W	0.658189		YLR070C	0.313781			YDR214W	11.1522		YDR407C	3870		YDR487C	0.796814
YDR347W	-0.222689		YDR543C	0.313876			YDR215C	#DIV/0!		YDR408C	645		YDR488C	0.171894
YDR351W	-0.481516		YGL142C	0.313948			YDR216W	3.30743		YDR409W	2715		YDR489W	0.203602
YDR352W	0.349351		YFL051C	0.313954			YDR217C	1.55691		YDR410C	720		YDR490C	0.548402
YDR353W	0.922219		YGL259W	0.313964			YDR218C	#DIV/0!		YDR411C	1026		YDR492W	0.800719
YDR354W	0.287341		YDL209C	0.31397			YDR219C	3.53153		YDR412W	708		YDR493W	0.298501
YDR356W	-0.374382		YPL108W	0.314012			YDR220C	#DIV/0!		YDR414C	1089		YDR494W	0.916935
YDR358W	0.593353		YPL267W	0.314053			YDR221W	4.17247		YDR415C	1125		YDR495C	0.256335
YDR363W	-1.19303		YJR019C	0.314077			YDR222W	4.44081		YDR416W	2580		YDR496C	0.598748
YDR363W-A	1.19674		YMR081C	0.314081			YDR223W	1.20847		YDR418W	498		YDR497C	3.64483
YDR367W	0.0963812		YPL077C	0.314269			YDR224C	2.76795		YDR419W	1899		YDR498C	0.426152
YDR368W	1.00566		YDR414C	0.314269			YDR225W	2.40159		YDR420W	5409		YDR499W	0.366808
YDR371W	-0.366605		YKL171W	0.314316			YDR226W	14.5881		YDR421W	2853		YDR500C	1.76238
YDR374W-A	-0.0887759		YLR399W-A	0.314378			YDR227W	2.08864		YDR422C	2448		YDR501W	0.261255
YDR376W	-0.101527		YDR003W	0.314387			YDR228C	1.90012		YDR423C	1230		YDR502C	3.80375
YDR377W	0.384012		YGR098C	0.314392			YDR229W	2.05192		YDR424C	455		YDR503C	0.310343
YDR379W	-0.707833		YJR055W	0.314403			YDR230W	2.64877		YDR425W	1878		YDR505C	0.789056
YDR380W	0.508739		YKL162C-A	0.31441			YDR231C	5.29683		YDR426C	378		YDR506C	0.264369
YDR381W	1.07009		YNL159C	0.314505			YDR232W	3.7597		YDR427W	1182		YDR507C	0.843984
YDR382W	1.09278		YNL033W	0.314511			YDR233C	7.40359		YDR428C	786		YDR508C	0.37531
YDR385W	0.194409		YDR315C	0.314533			YDR234W	5.60924		YDR429C	825		YDR510W	0.820146
YDR386W	-0.632723		YLR358C	0.314547			YDR235W	1.99264		YDR430C	2970		YDR511W	0.437652
YDR388W	0.438312		YGR044C	0.314613			YDR236C	5.54638		YDR434W	1605		YDR512C	0.567512
YDR389W	-0.672243		YDR030C	0.314618			YDR237W	5.94962		YDR435C	987		YDR514C	0.287787
YDR392W	0.214976		YJR106W	0.31462			YDR238C	6.57425		YDR436W	2133		YDR515W	0.378415
YDR393W	-0.383522		YNL043C	0.314631			YDR239C	3.39413		YDR438W	1113		YDR516C	0.939855
YDR394W	0.608691		YHR191C	0.314635			YDR240C	1.6757		YDR439W	1044		YDR517W	0.658659
YDR395W	0.169094		YGL199C	0.314645			YDR241W	#DIV/0!		YDR440W	1749		YDR518W	0.280964
YDR398W	0.154679		YML133C	0.314666			YDR242W	2.2697		YDR441C	546		YDR519W	0.563701
YDR399W	0.66649		YCR101C	0.314696			YDR243C	2.9395		YDR442W	393		YDR520C	0.325788
YDR401W	-3.55948		YBL029W	0.31471			YDR244W	3.2515		YDR443C	4263		YDR522C	0.0697588
YDR403W	-0.641495		YMR294W-A	0.314712			YDR245W	3.51611		YDR444W	2064		YDR523C	0.0736543
YDR405W	0.854651		YDL057W	0.314732			YDR246W	5.71834		YDR445C	408		YDR524C	0.485746
YDR406W	-2.46315		YLR036C	0.314809			YDR246W-A	#DIV/0!		YDR446W	909		YDR525W-A	0.282063
YDR409W	-0.939542		YMR265C	0.314842			YDR247W	1.39336		YDR447C	725		YDR527W	0.438158
YDR412W	0.46929		YOR012W	0.314877			YDR248C	4.4426		YDR448W	1305		YDR528W	0.258553
YDR416W	-0.321066		YHL030W-A	0.314889			YDR249C	1.73672		YDR449C	1323		YDR529C	2.753
YDR418W	1.18315		YKR040C	0.31491			YDR250C	#DIV/0!		YDR450W	876		YDR530C	0.316002
YDR419W	-0.745331		YNL214W	0.314934			YDR251W	4.37252		YDR451C	1062		YDR531W	0.883877
YDR420W	-2.1823		YJR090C	0.31498			YDR252W	2.3382		YDR452W	2025		YDR532C	0.27101
YDR421W	-1.2127		YEL006W	0.314983			YDR253C	4.54183		YDR453C	591		YDR533C	0.924448
YDR425W	-0.259987		YGL057C	0.315005			YDR254W	2.42667		YDR454C	564		YDR534C	0.0863799
YDR427W	0.557364		YDR042C	0.315023			YDR255C	3.85305		YDR456W	1902		YDR536W	0.395538
YDR434W	0.0691415		YJR147W	0.315053			YDR256C	4.62909		YDR457W	9807		YDR538W	0.139613
YDR436W	-0.325071		YGL208W	0.315065			YDR257C	4.01867		YDR458C	1992		YDR539W	0.251064
YDR438W	-4.74762		YAL009W	0.315078			YDR258C	6.27338		YDR459C	1125		YDR540C	0.037869
YDR439W	-0.41759		YOR213C	0.315105			YDR259C	1.50883		YDR460W	966		YDR541C	0.168108
YDR440W	-0.697553		YEL016C	0.315127			YDR260C	4.0794		YDR461C-A	243		YEL001C	0.802048
YDR444W	-1.06465		YAL030W	0.315148			YDR261C	4.88818		YDR461W	111		YEL002C	1.03299
YDR448W	0.0109314		YOR368W	0.315155			YDR262W	2.58332		YDR462W	444		YEL003W	0.55097
YDR450W	0.948411		YNL337W	0.315157			YDR263C	1.41457		YDR463W	1560		YEL004W	0.30287
YDR452W	-0.423381		YKL034W	0.315192			YDR264C	3.43326		YDR464W	4308		YEL005C	0.350629
YDR456W	-0.239779		YIL092W	0.315206			YDR265W	2.91056		YDR465C	1239		YEL006W	0.442224
YDR457W	-1.66943		YNL067W-B	0.315207			YDR266C	3.40752		YDR466W	2697		YEL007W	0.848078
YDR460W	0.272327		YDL120W	0.315222			YDR267C	4.31533		YDR468C	675		YEL009C	6.88167
YDR461W	0.443694		YPL277C	0.31524			YDR268W	6.60406		YDR469W	528		YEL011W	1.55035
YDR462W	1.33894		YKR033C	0.31525			YDR269C	#DIV/0!		YDR470C	1509		YEL012W	0.762892
YDR463W	0.675243		YNR040W	0.315255			YDR270W	2.75543		YDR471W	795		YEL013W	0.636323
YDR464W	-0.944983		YBR063C	0.31528			YDR271C	4.49819		YDR472W	852		YEL015W	0.679117
YDR466W	-1.09957		YDR010C	0.315317			YDR272W	7.0611		YDR473C	1410		YEL016C	0.343329
YDR469W	0.234329		YKL052C	0.315317			YDR273W	#DIV/0!		YDR475C	2631		YEL017C-A	0.537419
YDR471W	0.706335		YOR008W-B	0.315342			YDR274C	#DIV/0!		YDR476C	675		YEL017W	0.451975
YDR472W	0.665305		YPR092W	0.315348			YDR275W	1.86624		YDR477W	1902		YEL018W	0.300787
YDR477W	0.205808		YBR182C	0.31535			YDR276C	8.17501		YDR478W	597		YEL019C	0.11712
YDR478W	0.37141		YMR191W	0.315393			YDR277C	3.43425		YDR479C	1665		YEL020C	0.549484
YDR483W	0.107717		YMR063W	0.315402			YDR278C	#DIV/0!		YDR481C	1701		YEL020W-A	0.756527
YDR484W	-0.231121		YFR026C	0.315424			YDR279W	4.02616		YDR482C	408		YEL021W	0.51954
YDR489W	-0.00112281		YJL009W	0.315437			YDR280W	2.10639		YDR483W	1329		YEL022W	0.399952
YDR492W	0.626283		YPR002C-A	0.315468			YDR281C	0.711852		YDR484W	1926		YEL023C	0.26195
YDR493W	1.24406		YLR145W	0.315494			YDR282C	3.43841		YDR485C	2388		YEL024W	2.68054
YDR494W	0.298875		YGL044C	0.315508			YDR283C	2.85007		YDR486C	690		YEL025C	0.553568
YDR499W	-0.784327		YNL019C	0.315533			YDR284C	4.34562		YDR487C	627		YEL026W	0.641705
YDR501W	-0.0622077		YLR254C	0.315598			YDR285W	#DIV/0!		YDR488C	1602		YEL027W	1.62454
YDR510W	0.988966		YGR212W	0.315624			YDR286C	7.08004		YDR489W	885		YEL029C	0.277657
YDR511W	0.531662		YGR006W	0.315645			YDR287W	9.53336		YDR490C	2301		YEL030W	0.284228
YDR513W	0.711994		YFR022W	0.315649			YDR288W	2.6937		YDR492W	951		YEL031W	1.53935
YDR515W	0.188778		YDR154C	0.315652			YDR289C	3.48262		YDR493W	372		YEL032W	0.551538
YDR517W	0.389929		YPR071W	0.315656			YDR290W	#DIV/0!		YDR494W	1086		YEL034W	11.0985
YDR518W	0.507453		YER188C-A	0.315689			YDR291W	3.86407		YDR495C	3036		YEL036C	0.941681
YDR519W	0.64205		YOR002W	0.315697			YDR292C	5.18174		YDR496C	1971		YEL037C	1.18131
YDR525W-A	0.913157		YJL185C	0.315706			YDR293C	2.48479		YDR497C	1755		YEL038W	0.219383
YDR527W	-0.0102111		YDR525W-A	0.31574			YDR294C	5.52446		YDR498C	1152		YEL039C	0.299734
YDR528W	-1.14974		YGL032C	0.315849			YDR295C	2.32338		YDR499W	2244		YEL040W	0.676171
YDR531W	-0.184829		YHR079C	0.315886			YDR296W	6.09559		YDR500C	656		YEL041W	1.19641
YDR536W	-0.705193		YOL116W	0.315898			YDR297W	4.02001		YDR501W	1566		YEL042W	0.975198
YDR538W	-0.0695638		YKL162C	0.315917			YDR298C	8.75477		YDR502C	1155		YEL043W	0.49347
YDR539W	0.178675		YOR322C	0.315955			YDR299W	1.92486		YDR503C	825		YEL044W	0.564862
YEL073C	-0.495513		YDR351W	0.315987			YDR300C	3.52586		YDR504C	384		YEL046C	1.28549
YEL068C	-0.168766		YDR475C	0.31608			YDR301W	2.13218		YDR505C	2526		YEL047C	0.413563
YEL064C	-0.654658		YNL211C	0.316112			YDR302W	2.87137		YDR506C	1827		YEL048C	0.143619
YEL063C	-3.2304		YJL086C	0.316112			YDR303C	2.13137		YDR507C	3429		YEL049W	0.660982
YEL061C	-0.884574		YGL075C	0.316116			YDR304C	15.1639		YDR508C	1992		YEL050C	0.754444
YEL060C	0.499792		YJL146W	0.316143			YDR305C	4.40107		YDR510C-A	117		YEL051W	0.92351
YEL059C-A	0.658284		YMR154C	0.316146			YDR306C	3.31842		YDR510W	306		YEL052W	0.659628
YEL057C	-1.05694		YDR254W	0.316158			YDR307W	3.41924		YDR511W	402		YEL053C	0.396423
YEL055C	-0.191619		YPR197C	0.316165			YDR308C	4.20784		YDR512C	564		YEL054C	1.97091
YEL054C	1.00856		YLR156W	0.316204			YDR309C	1.50581		YDR513W	432		YEL055C	0.611428
YEL053C	-0.803084		YLR161W	0.316204			YDR310C	2.44		YDR514C	1452		YEL056W	0.424061
YEL050C	0.0131883		YLR159W	0.316204			YDR311W	2.26708		YDR515W	1344		YEL057C	0.205564
YEL048C	-0.920189		YNL279W	0.316214			YDR312W	3.02169		YDR516C	1503		YEL058W	0.990153
YEL047C	0.875042		YGR147C	0.316234			YDR313C	3.72235		YDR517W	1119		YEL059C-A	0.154288
YEL046C	0.482815		YOR298W	0.316299			YDR314C	1.71988		YDR518W	1554		YEL060C	4.71868
YEL039C	1.88649		YDL027C	0.316352			YDR315C	3.27797		YDR519W	408		YEL061C	0.411141
YEL037C	1.06477		YMR097C	0.316356			YDR316W	3.72714		YDR520C	2319		YEL062W	0.287688
YEL036C	-0.0410594		YMR173W-A	0.316367			YDR317W	2.81335		YDR522C	1509		YEL063C	0.900976
YEL029C	-0.0887015		YLR018C	0.316406			YDR318W	1.80929		YDR523C	1473		YEL064C	0.246135
YEL025C	-2.58295		YDR123C	0.31643			YDR319C	2.95272		YDR524C	1449		YEL065W	0.231461
YEL023C	-3.52513		YHR209W	0.316479			YDR320C	4.08166		YDR524C-A	120		YEL066W	0.531626
YEL017C-A	-0.300609		YDR421W	0.316598			YDR320C-A	1.86587		YDR524C-B	201		YEL069C	0.027917
YEL016C	-1.42799		YPL005W	0.316615			YDR320W-B	#DIV/0!		YDR525W-A	240		YEL070W	0.0945434
YEL009C-A	0.0325378		YIR021W-A	0.316634			YDR321W	10.9941		YDR527W	1320		YEL071W	1.95639
YEL009C	-3.06739		YML005W	0.316638			YDR322C-A	6.57137		YDR528W	1272		YEL072W	0.284767
YEL008C-A	-3.58006		YPL205C	0.316733			YDR322W	4.55596		YDR529C	384		YEL073C	0.128582
YEL005C	-0.616747		YMR317W	0.316733			YDR323C	1.94235		YDR530C	978		YER001W	0.660464
YEL002C	0.593081		YMR036C	0.31674			YDR324C	2.56428		YDR531W	1104		YER002W	0.658074
YEL001C	0.431175		YPR198W	0.316765			YDR325W	2.19266		YDR532C	1158		YER003C	1.20289
YER003C	0.7638		YPR122W	0.316766			YDR326C	2.4487		YDR533C	714		YER004W	2.08059
YER007C-A	1.06934		YLR379W	0.316811			YDR327W	12.3395		YDR534C	1587		YER005W	0.374264
YER008C	-0.765881		YIL150C	0.316828			YDR328C	13.1737		YDR535C	757		YER006W	0.783768
YER010C	0.280952		YGR036C	0.316839			YDR329C	3.3758		YDR536W	1710		YER007C-A	0.589086
YER017C	-0.363222		YMR158W-B	0.316854			YDR330W	6.27903		YDR538W	729		YER007W	0.23962
YER018C	0.100433		YNL174W	0.31686			YDR331W	2.02827		YDR539W	1512		YER008C	0.483435
YER019C-A	0.73531		YJR071W	0.316866			YDR332W	3.64723		YDR540C	540		YER009W	1.25911
YER026C	0.693148		YBL010C	0.316905			YDR333C	2.32371		YDR541C	1035		YER010C	0.619003
YER027C	0.651467		YPL133C	0.316922			YDR334W	1.61632		YEL001C	678		YER012W	1.45001
YER028C	-0.515364		YCL036W	0.316938			YDR335W	3.33202		YEL002C	1293		YER013W	0.298258
YER029C	0.653205		YHR167W	0.316939			YDR336W	3.56355		YEL003W	424		YER014W	0.549814
YER031C	0.338172		YMR073C	0.316948			YDR337W	5.86034		YEL004W	1029		YER015W	1.71607
YER033C	-1.47474		YJL059W	0.316955			YDR338C	1.64191		YEL005C	849		YER016W	0.298209
YER036C	0.350628		YNR023W	0.316959			YDR339C	2.79121		YEL006W	1008		YER017C	1.04465
YER038C	-1.60563		YPL068C	0.316984			YDR340W	4.53019		YEL007W	2001		YER018C	0.149612
YER039C	-4.01919		YPL164C	0.317012			YDR341C	10.387		YEL008C-A	93		YER019C-A	0.796075
YER043C	0.774086		YNL042W	0.317045			YDR344C	#DIV/0!		YEL008W	381		YER019W	0.374622
YER044C	0.78809		YLR014C	0.317073			YDR345C	4.20829		YEL009C	846		YER020W	1.12338
YER044C-A	-3.52849		YJL058C	0.317091			YDR346C	4.7961		YEL009C-A	408		YER021W	1.8002
YER045C	-0.646384		YOR300W	0.317184			YDR347W	6.7248		YEL011W	2115		YER022W	0.389925
YER047C	-0.559765		YHR116W	0.317191			YDR348C	2.70494		YEL012W	780		YER023W	1.12224
YER048C	0.800532		YDR349C	0.317216			YDR349C	4.87201		YEL013W	1737		YER024W	2.06578
YER050C	0.788397		YOR325W	0.31725			YDR350C	1.94462		YEL015W	1656		YER025W	1.10505
YER052C	0.72531		YGR014W	0.317326			YDR351W	1.66059		YEL016C	1482		YER026C	1.51583
YER053C	0.167102		YGR063C	0.317343			YDR352W	3.19799		YEL017C-A	132		YER027C	0.477488
YER053C-A	-0.123259		YCL073C	0.317356			YDR353W	11.2303		YEL017W	1014		YER028C	0.0961422
YER054C	-1.16777		YNL167C	0.317387			YDR354C-A	5.29521		YEL018W	840		YER029C	0.368185
YER055C	0.430825		YFL054C	0.31741			YDR354W	6.02952		YEL020W-A	264		YER030W	1.09642
YER056C	0.487409		YDL111C	0.317444			YDR355C	#DIV/0!		YEL021W	804		YER031C	0.704953
YER056C-A	1.0069		YNL003C	0.317483			YDR356W	2.65403		YEL022W	4380		YER032W	0.402774
YER057C	1.14274		YKR053C	0.317485			YDR357C	4.46905		YEL023C	2049		YER033C	0.227287
YER061C	0.00785347		YLR154W-E	0.317503			YDR358W	4.59585		YEL024W	648		YER034W	0.370352
YER062C	0.86118		YKR087C	0.317513			YDR359C	1.99502		YEL025C	3567		YER035W	0.417454
YER064C	-0.182101		YER152C	0.317521			YDR360W	2.00343		YEL026W	381		YER036C	1.24948
YER065C	-2.07893		YAR023C	0.317538			YDR361C	5.71532		YEL027W	483		YER037W	0.527123
YER071C	0.363512		YMR112C	0.317552			YDR362C	2.21231		YEL028W	462		YER039C	0.285502
YER075C	-0.860859		YPL255W	0.31758			YDR363W	2.86167		YEL029C	939		YER040W	0.372678
YER076C	-0.334151		YPL100W	0.317596			YDR363W-A	#DIV/0!		YEL030W	1935		YER041W	0.374218
YER077C	-0.298912		YOL164W	0.317606			YDR364C	1.9746		YEL031W	3648		YER042W	1.00766
YER078C	-0.285288		YOR305W	0.317672			YDR365C	4.48686		YEL032W	2916		YER043C	3.41858
YER082C	0.308867		YOR205C	0.317679			YDR367W	6.17527		YEL033W	420		YER044C	1.29657
YER083C	0.759042		YMR150C	0.317687			YDR368W	16.4406		YEL034C-A	603		YER044C-A	0.042566
YER087C-B	0.161452		YLR446W	0.317711			YDR369C	2.97382		YEL034W	474		YER045C	0.277613
YER088C	-0.203874		YCL038C	0.317736			YDR370C	1.37824		YEL036C	1503		YER046W	0.25232
YER088C-A	-1.78347		YDL034W	0.317773			YDR371C-A	3.8992		YEL037C	1197		YER047C	0.509934
YER089C	-0.110565		YDL033C	0.317788			YDR371W	4.0745		YEL038W	684		YER048C	0.785514
YER091C	0.504131		YGL169W	0.317794			YDR372C	5.64114		YEL039C	342		YER048W-A	0.539225
YER093C	-1.264		YPL168W	0.3178			YDR373W	6.21407		YEL040W	1404		YER049W	0.580925
YER093C-A	0.199186		YDL197C	0.317807			YDR374C	#DIV/0!		YEL041W	1488		YER050C	0.610527
YER094C	0.693137		YOL158C	0.317813			YDR374W-A	5.50863		YEL042W	1557		YER051W	0.315494
YER099C	0.608836		YLR131C	0.317829			YDR375C	8.12071		YEL043W	2871		YER052C	2.27382
YER101C	0.662398		YJL038C	0.317846			YDR376W	5.33017		YEL044W	501		YER053C	0.472272
YER105C	-1.11874		YKR077W	0.317894			YDR377W	9.41679		YEL046C	1164		YER054C	1.12812
YER107C	0.181816		YLR232W	0.317975			YDR378C	5.80522		YEL047C	1413		YER055C	1.89232
YER109C	-2.41282		YCR106W	0.317978			YDR379C-A	#DIV/0!		YEL048C	459		YER056C	1.95184
YER110C	0.328009		YOR381W	0.318018			YDR379W	1.869		YEL049W	363		YER056C-A	1.48456
YER111C	-1.08348		YNL028W	0.31806			YDR380W	5.80356		YEL050C	1182		YER057C	0.916812
YER113C	-0.941862		YPL216W	0.318128			YDR381C-A	4.78899		YEL051W	771		YER058W	0.400695
YER114C	-0.176137		YDR192C	0.318176			YDR381W	8.35488		YEL052W	1530		YER059W	0.388904
YER115C	-1.9284		YOR018W	0.318254			YDR382W	15.6645		YEL053C	2202		YER060W	0.27023
YER116C	-0.418929		YPL247C	0.318268			YDR383C	3.84132		YEL054C	498		YER060W-A	0.158677
YER118C	-0.044698		YLR451W	0.318282			YDR384C	3.23407		YEL055C	3069		YER061C	0.304532
YER119C	0.154813		YMR310C	0.318343			YDR386W	2.42848		YEL056W	1206		YER062C	0.659839
YER122C	0.468961		YGR238C	0.318385			YDR387C	3.18356		YEL057C	702		YER063W	0.641833
YER124C	-0.0290328		YNL092W	0.318399			YDR388W	11.2785		YEL058W	1674		YER064C	0.264509
YER126C	0.894663		YOL162W	0.318432			YDR389W	2.11805		YEL059C-A	225		YER065C	2.01929
YER130C	-0.251168		YGR121W-A	0.318489			YDR390C	3.35757		YEL060C	1908		YER067W	0.546256
YER132C	-2.24729		YCL069W	0.318504			YDR391C	13.4832		YEL061C	3003		YER068W	0.574734
YER134C	0.741613		YML107C	0.318505			YDR392W	4.10178		YEL062W	1848		YER069W	3.48889
YER137C	0.109256		YBR204C	0.318528			YDR393W	2.39988		YEL063C	1773		YER070W	1.36885
YER139C	0.0415492		YNL126W	0.318561			YDR394W	5.44665		YEL064C	1443		YER071C	0.263035
YER142C	0.453598		YDR179W-A	0.318564			YDR395W	4.97548		YEL065W	1887		YER072W	0.602394
YER144C	-1.67175		YDR404C	0.318573			YDR396W	3.25012		YEL066W	540		YER073W	1.89842
YER145C	0.491634		YBL049W	0.318619			YDR397C	6.04072		YEL068C	333		YER074W	3.52777
YER147C	0.0472222		YCL063W	0.318721			YDR398W	2.27791		YEL070W	1509		YER074W-A	0.444225
YER149C	-0.0243472		YNL309W	0.318757			YDR399W	3.32863		YEL071W	1491		YER075C	0.40367
YER151C	0.184426		YOL097W-A	0.31877			YDR400W	6.48232		YEL072W	696		YER076C	0.215106
YER152C	-0.687499		YLR001C	0.318845			YDR401W	#DIV/0!		YEL073C	324		YER077C	0.333926
YER155C	-1.85436		YNL032W	0.318845			YDR402C	#DIV/0!		YER001W	2289		YER078C	0.323267
YER156C	0.88721		YBR158W	0.318857			YDR403W	#DIV/0!		YER002W	696		YER079W	0.729446
YER158C	-0.207089		YNL223W	0.318902			YDR404C	3.69648		YER003C	1383		YER080W	0.922
YER159C	0.492845		YPR013C	0.318907			YDR405W	2.10805		YER004W	696		YER081W	1.32476
YER161C	-0.254036		YKR105C	0.318917			YDR406W	3.66324		YER005W	1893		YER082C	0.486572
YER162C	-0.0467287		YCR076C	0.318928			YDR406W-A	#DIV/0!		YER006W	1563		YER083C	0.514874
YER163C	-0.0404886		YER005W	0.31893			YDR407C	2.43699		YER007C-A	649		YER085C	0.0192337
YER168C	0.325658		YIL090W	0.318977			YDR408C	8.01675		YER007W	1557		YER086W	1.67764
YER172C	-1.29419		YMR268C	0.318979			YDR409W	2.7823		YER008C	4011		YER087C-B	0.620594
YER174C	0.375565		YNR032C-A	0.318983			YDR410C	3.04814		YER009W	378		YER087W	0.357981
YER175C	0.223375		YBL039W-B	0.318987			YDR411C	3.94237		YER010C	705		YER088C	0.843568
YER180C	-7.11737		YNL245C	0.318989			YDR412W	3.08767		YER011W	765		YER089C	0.700123
YER180C-A	0.0720075		YML095C	0.31899			YDR413C	4.59171		YER012W	597		YER090W	1.30587
YER183C	0.30829		YDR387C	0.319025			YDR414C	3.16303		YER013W	3438		YER091C	6.56024
YER184C	-1.39981		YDR118W	0.319104			YDR415C	4.07831		YER014W	1620		YER092W	0.485374
YER186C	-4.69393		YDR119W	0.319116			YDR416W	1.66036		YER015W	2235		YER093C	0.397968
YER188C-A	-2.75962		YBR089W	0.319121			YDR417C	#DIV/0!		YER016W	1035		YER093C-A	0.345402
YEL072W	-1.80493		YOR079C	0.319146			YDR418W	15.8225		YER017C	2286		YER094C	1.49104
YEL071W	0.529762		YBR007C	0.319161			YDR419W	2.53373		YER018C	666		YER095W	0.915538
YEL070W	-1.01235		YER093C-A	0.319189			YDR421W	3.5984		YER019C-A	267		YER096W	0.493636
YEL066W	0.999323		YNL295W	0.319197			YDR422C	1.89683		YER019W	1434		YER098W	0.291937
YEL065W	0.0196175		YMR158C-A	0.319238			YDR423C	5.60478		YER020W	1350		YER099C	0.515695
YEL062W	-0.607659		YFL021W	0.319301			YDR424C	17.0685		YER021W	1572		YER100W	0.731572
YEL058W	0.203601		YDR003W-A	0.319315			YDR425W	2.82458		YER022W	2064		YER101C	0.436106
YEL056W	-0.0253862		YOR296W	0.319335			YDR426C	#DIV/0!		YER023C-A	213		YER102W	4.88542
YEL052W	-0.0773182		YBR103W	0.319339			YDR427W	5.15228		YER023W	861		YER103W	2.64141
YEL051W	0.403818		YJL126W	0.319409			YDR428C	6.36119		YER024W	2772		YER104W	0.236659
YEL049W	-2.05553		YML113W	0.319465			YDR429C	7.96758		YER025W	1584		YER105C	0.633187
YEL044W	1.03858		YAL058W	0.319469			YDR430C	4.75827		YER026C	831		YER106W	0.048666
YEL043W	-1.37619		YGL220W	0.319477			YDR431W	#DIV/0!		YER027C	1254		YER107C	0.432687
YEL042W	0.0809588		YPL148C	0.319536			YDR432W	12.8396		YER028C	1185		YER109C	0.249479
YEL041W	-0.0570744		YOR064C	0.319539			YDR433W	#DIV/0!		YER029C	591		YER110C	1.19747
YEL040W	0.409762		YKR101W	0.319549			YDR434W	4.23844		YER030W	462		YER111C	0.390256
YEL038W	0.494936		YBR090C	0.319628			YDR435C	9.12229		YER031C	672		YER112W	0.626631
YEL034W	1.0841		YEL034C-A	0.319629			YDR436W	2.94399		YER032W	2631		YER113C	0.423509
YEL033W	-8.1375		YPR067W	0.319638			YDR437W	#DIV/0!		YER033C	3231		YER114C	0.565523
YEL032W	-0.421681		YDL104C	0.319658			YDR438W	1.80579		YER034W	558		YER115C	0.190496
YEL031W	-0.185417		YJL181W	0.319665			YDR439W	2.93742		YER035W	438		YER116C	0.313188
YEL030W	-1.43518		YGL114W	0.319713			YDR440W	2.30448		YER036C	1833		YER117W	2.6554
YEL028W	-4.17029		YDR118W-A	0.319761			YDR441C	3.68226		YER037W	966		YER118C	0.515723
YEL027W	0.793512		YMR018W	0.319763			YDR442W	3.10411		YER038C	1395		YER119C	0.639073
YEL026W	0.679947		YGR096W	0.319766			YDR443C	2.63766		YER038W-A	381		YER120W	1.18629
YEL024W	0.612443		YFR034W-A	0.319777			YDR444W	1.71535		YER039C	750		YER121W	0.601599
YEL022W	-0.83797		YDR521W	0.319793			YDR445C	2.90187		YER040W	2193		YER123W	0.412887
YEL021W	0.964775		YDL002C	0.319842			YDR446W	#DIV/0!		YER041W	2280		YER124C	0.652082
YEL020W-A	1.24761		YDR479C	0.319844			YDR447C	14.6224		YER042W	555		YER125W	1.18819
YEL018W	0.151631		YGR290W	0.319889			YDR448W	2.42469		YER043C	1350		YER126C	0.614783
YEL017W	0.258308		YGL131C	0.319913			YDR449C	1.67907		YER044C	447		YER127W	0.301298
YEL015W	0.0755885		YFL067W	0.319938			YDR450W	20.4734		YER044C-A	1315		YER128W	0.296754
YEL013W	-0.0910548		YPR005C	0.319993			YDR451C	1.19494		YER045C	1470		YER129W	0.517683
YEL012W	0.704827		YDR509W	0.32002			YDR452W	5.09748		YER046W	432		YER130C	0.36414
YEL011W	-0.0972276		YDR008C	0.32003			YDR453C	#DIV/0!		YER047C	2694		YER131W	1.91847
YEL008W	-5.2737		YER034W	0.320039			YDR454C	24.0813		YER048C	1176		YER132C	0.264277
YEL007W	-0.700946		YBR066C	0.320052			YDR455C	#DIV/0!		YER048W-A	285		YER133W	1.66105
YEL006W	-0.900333		YMR287C	0.320055			YDR456W	4.90585		YER049W	1935		YER134C	0.315063
YEL004W	0.0556672		YNL282W	0.320067			YDR457W	4.92748		YER050C	417		YER136W	1.41039
YEL003W	0.548318		YKR106W	0.320077			YDR458C	2.61864		YER051W	1479		YER137C	0.125297
YER001W	0.369371		YJL064W	0.320081			YDR459C	2.99355		YER052C	1584		YER139C	0.304703
YER002W	1.17155		YPR158W	0.320092			YDR460W	3.51422		YER053C	903		YER140W	0.238075
YER004W	0.305454		YNR062C	0.320144			YDR461C-A	#DIV/0!		YER053C-A	114		YER141W	1.22165
YER005W	-0.901373		YLR385C	0.320145			YDR461W	#DIV/0!		YER054C	1647		YER142C	0.498233
YER006W	0.653986		YDR105C	0.32015			YDR462W	4.7988		YER055C	894		YER143W	0.976703
YER007W	-0.187616		YBL091C-A	0.32015			YDR463W	2.04693		YER056C	1602		YER144C	0.60013
YER009W	1.04285		YPL039W	0.32016			YDR464C-A	1.65042		YER056C-A	763		YER145C	1.55858
YER011W	1.8323		YDR128W	0.320192			YDR464W	2.44201		YER057C	390		YER146W	0.375394
YER012W	0.482703		YOR249C	0.320199			YDR465C	6.66972		YER058W	324		YER147C	0.318366
YER013W	-0.442934		YHL050C	0.320209			YDR466W	1.51838		YER059W	1263		YER148W	0.778596
YER014W	0.346735		YJL195C	0.320223			YDR467C	2.25888		YER060W	1587		YER149C	0.358502
YER015W	-0.825916		YPR078C	0.320246			YDR468C	3.34066		YER060W-A	1593		YER150W	0.629303
YER016W	0.20976		YKR104W	0.320255			YDR469W	6.50736		YER061C	1329		YER151C	0.741853
YER019W	0.138179		YBR209W	0.320257			YDR470C	3.08355		YER062C	753		YER152C	0.423719
YER020W	0.48022		YER119C	0.320307			YDR471W	9.39975		YER063W	657		YER153C	0.0579012
YER021W	0.466385		YPL191C	0.320328			YDR472W	3.34652		YER064C	1518		YER154W	0.587473
YER022W	0.0466856		YDR347W	0.320342			YDR473C	3.84672		YER065C	1674		YER155C	0.616765
YER023W	0.742282		YFL064C	0.320369			YDR475C	3.60594		YER066W	558		YER156C	0.656858
YER024W	-1.8639		YDR131C	0.320375			YDR476C	9.55081		YER067W	486		YER157W	0.322618
YER025W	0.469243		YDL036C	0.320387			YDR477W	3.86968		YER068W	1764		YER158C	0.632956
YER030W	1.2298		YLR457C	0.320444			YDR478W	3.84434		YER069W	2592		YER159C	1.0012
YER032W	-0.650889		YGR179C	0.320469			YDR479C	2.92123		YER070W	2667		YER161C	0.497701
YER034W	0.723458		YPL002C	0.320534			YDR480W	4.41061		YER071C	381		YER162C	0.383302
YER035W	0.866078		YLR234W	0.320547			YDR481C	3.71239		YER072W	390		YER163C	0.297836
YER037W	0.637998		YLR147C	0.320565			YDR482C	6.1365		YER073W	1563		YER164W	0.557965
YER038W-A	-2.46031		YKL222C	0.320577			YDR483W	7.83141		YER074W	874		YER165W	2.91708
YER040W	-0.736116		YMR037C	0.320589			YDR484W	1.66699		YER074W-A	471		YER166W	0.631181
YER041W	-1.88158		YFR029W	0.320601			YDR485C	2.28097		YER075C	2787		YER167W	0.591979
YER042W	1.16349		YIL100W	0.320604			YDR486C	6.92545		YER076C	909		YER168C	0.369442
YER046W	-0.590835		YLR412W	0.320622			YDR487C	13.0822		YER076W-A	348		YER169W	0.539718
YER048W-A	-0.106896		YOL002C	0.320645			YDR488C	5.58075		YER077C	2067		YER170W	0.385311
YER049W	0.306747		YDL012C	0.320679			YDR489W	3.08277		YER078C	1536		YER171W	0.499608
YER051W	-0.819152		YJR083C	0.320691			YDR490C	3.74729		YER079W	633		YER172C	0.369528
YER058W	0.451076		YDR169C	0.320699			YDR491C	#DIV/0!		YER080W	1884		YER173W	0.362666
YER059W	0.323881		YBR121C-A	0.320702			YDR492W	1.46975		YER081W	1410		YER174C	0.529272
YER060W	-0.573929		YMR019W	0.320705			YDR493W	4.29008		YER082C	1665		YER175C	0.789721
YER060W-A	1.55689		YOR250C	0.320727			YDR494W	5.12974		YER083C	858		YER176W	0.543016
YER063W	0.492798		YMR160W	0.320749			YDR495C	1.55867		YER084W	387		YER177W	4.02795
YER066W	-1.26958		YHR175W	0.320786			YDR496C	3.06345		YER085C	522		YER178W	2.82994
YER067W	0.764734		YIR018W	0.320795			YDR497C	3.84988		YER086W	1731		YER179W	0.166896
YER068W	0.807962		YOR353C	0.32081			YDR498C	2.45435		YER087C-B	249		YER180C	0.195622
YER069W	0.123373		YJL105W	0.320832			YDR499W	1.89541		YER087W	1731		YER180C-A	0.0858799
YER070W	-0.112058		YIL134W	0.32085			YDR500C	15.1923		YER088C	2013		YER182W	0.879635
YER072W	1.16503		YOR015W	0.320859			YDR501W	3.24624		YER088C-A	324		YER183C	0.295539
YER073W	0.166535		YLR289W	0.320873			YDR502C	9.59621		YER088W-B	147		YER184C	0.191115
YER074W	1.25965		YNL158W	0.320883			YDR503C	2.53582		YER089C	1395		YER185W	0.104273
YER074W-A	0.877659		YLR350W	0.320883			YDR504C	7.19012		YER090W	1524		YER186C	0.392707
YER076W-A	0.127183		YLR241W	0.320894			YDR505C	3.57022		YER091C	2304		YER187W	0.0527122
YER079W	0.51882		YMR064W	0.320901			YDR506C	3.6282		YER092W	378		YER190W	0.194082
YER080W	0.15913		YER035W	0.320906			YDR507C	2.90563		YER093C	4293		YFL001W	0.295446
YER081W	0.32861		YKR027W	0.320923			YDR508C	2.68349		YER093C-A	489		YFL002C	0.400207
YER084W	0.342415		YHR165W-A	0.320926			YDR509W	2.78804		YER094C	618		YFL003C	0.0956568
YER086W	-0.0394232		YGL010W	0.320927			YDR510C-A	11.9873		YER095W	1203		YFL004W	0.72222
YER087W	0.232708		YGR166W	0.320933			YDR510W	9.45762		YER096W	1539		YFL005W	1.08832
YER088W-B	-3.29191		YER183C	0.320975			YDR511W	5.28452		YER098W	2265		YFL007W	1.11628
YER090W	0.511094		YBR033W	0.320985			YDR512C	20.4499		YER099C	957		YFL008W	0.479525
YER092W	0.236041		YDR329C	0.320994			YDR513W	#DIV/0!		YER100W	753		YFL009W	0.472303
YER095W	0.292765		YEL025C	0.320996			YDR514C	2.20207		YER101C	1293		YFL010C	0.515842
YER096W	-0.19201		YER044C-A	0.32101			YDR515W	2.55885		YER102W	603		YFL011W	0.138999
YER098W	-1.20717		YNR039C	0.32103			YDR516C	10.2829		YER103W	1929		YFL012W	0.0172841
YER100W	0.937361		YNL320W	0.321032			YDR517W	6.87198		YER104W	627		YFL013C	0.767285
YER102W	0.602398		YKR064W	0.321043			YDR518W	6.62945		YER105C	4176		YFL014W	12.7413
YER103W	-0.252045		YOR333C	0.32111			YDR519W	10.1809		YER106W	909		YFL016C	1.02771
YER104W	-0.0348625		YAL065C	0.321127			YDR520C	1.17478		YER107C	1098		YFL017C	0.290908
YER106W	0.0600151		YOR135C	0.321145			YDR521W	#DIV/0!		YER109C	2400		YFL017W-A	0.198867
YER112W	1.03869		YBR186W	0.321162			YDR522C	#DIV/0!		YER110C	3342		YFL018C	2.5562
YER117W	1.20008		YPR150W	0.321166			YDR523C	#DIV/0!		YER111C	3282		YFL021W	0.961964
YER120W	1.17817		YDL224C	0.32117			YDR524C	2.5901		YER112W	564		YFL022C	1.13774
YER121W	0.0368917		YLL007C	0.321183			YDR524C-A	#DIV/0!		YER113C	2121		YFL023W	0.390152
YER123W	-0.433661		YHR150W	0.321193			YDR524C-B	10.6442		YER114C	3123		YFL024C	0.686973
YER125W	-0.293424		YLR104W	0.321215			YDR524W-C	9.16245		YER115C	576		YFL025C	0.387242
YER127W	1.0438		YGL262W	0.321222			YDR525W	#DIV/0!		YER116C	825		YFL026W	1.14311
YER128W	0.879242		YKR099W	0.321235			YDR525W-A	5.58157		YER117W	885		YFL027C	0.267625
YER129W	-1.70465		YOR307C	0.32124			YDR526C	#DIV/0!		YER118C	1104		YFL028C	0.496574
YER131W	0.822272		YIL002C	0.321247			YDR527W	3.55703		YER119C	1347		YFL029C	0.392085
YER133W	0.54171		YDR183C-A	0.321252			YDR528W	1.41842		YER120W	735		YFL030W	2.3049
YER136W	0.366069		YLR116W	0.321274			YDR529C	6.36755		YER121W	345		YFL031W	0.741205
YER138W-A	-3.72302		YMR324C	0.321276			YDR530C	10.0763		YER122C	1482		YFL033C	0.512965
YER140W	-0.595142		YOR268C	0.32129			YDR531W	5.78842		YER123W	1575		YFL034C-A	0.827456
YER141W	0.464186		YPR085C	0.321368			YDR532C	3.07001		YER124C	1722		YFL034C-B	0.342804
YER143W	0.828544		YLR137W	0.321388			YDR533C	21.3278		YER125W	2430		YFL034W	0.377525
YER146W	1.111		YMR025W	0.321393			YDR534C	2.71571		YER126C	786		YFL036W	0.791899
YER148W	0.00428085		YLR199C	0.321402			YDR535C	#DIV/0!		YER127W	1074		YFL037W	1.76481
YER150W	-0.983689		YHR004C	0.321433			YDR536W	#DIV/0!		YER128W	612		YFL038C	2.00049
YER154W	-0.199798		YHL012W	0.321443			YDR537C	#DIV/0!		YER129W	3429		YFL039C	5.90723
YER157W	-0.491324		YBR022W	0.321516			YDR538W	6.83286		YER130C	1332		YFL040W	0.140869
YER164W	-0.399643		YDR106W	0.321519			YDR539W	5.61052		YER131W	360		YFL041W	0.761451
YER165W	0.583592		YGR035C	0.321525			YDR540C	1.78675		YER132C	5262		YFL041W-A	0.0694987
YER166W	-0.971973		YPL177C	0.321533			YDR541C	4.81575		YER133W	1464		YFL042C	0.63076
YER167W	-1.12745		YCR038C	0.32155			YDR542W	1.77652		YER134C	537		YFL044C	0.786218
YER169W	-0.596354		YBR254C	0.321559			YDR543C	1.96204		YER136W	1356		YFL045C	1.65504
YER170W	0.513739		YBL014C	0.32157			YDR544C	#DIV/0!		YER137C	447		YFL046W	0.511707
YER171W	-0.396906		YMR172W	0.321577			YDR545C-A	#DIV/0!		YER138W-A	105		YFL047W	0.509433
YER173W	-1.40498		YML011C	0.32159			YEL001C	12.4817		YER139C	681		YFL048C	0.730539
YER175W-A	-4.26237		YBR174C	0.321622			YEL002C	9.59016		YER140W	1671		YFL049W	0.432385
YER176W	-0.641398		YMR077C	0.321696			YEL003W	6.13666		YER141W	1461		YFL050C	0.232415
YER177W	1.01364		YNL228W	0.321774			YEL004W	4.0576		YER142C	891		YFL051C	0.0620881
YER178W	0.489475		YMR134W	0.321785			YEL005C	4.42015		YER143W	1287		YFL052W	0.115324
YER179W	0.238667		YDL118W	0.321846			YEL006W	3.621		YER144C	2418		YFL053W	0.108859
YER182W	0.915874		YKL090W	0.321851			YEL007W	1.84177		YER145C	1215		YFL054C	0.715697
YER187W	-2.07719		YKL156C-A	0.321874			YEL008C-A	#DIV/0!		YER146W	282		YFL055W	0.364107
YER188W	-0.829024		YCL001W-B	0.321875			YEL008W	#DIV/0!		YER147C	1875		YFL056C	0.161211
YFL057C	-3.84431		YJR100C	0.32188			YEL009C	5.99438		YER148W	723		YFL057C	0.127365
YFL054C	-1.57381		YKR063C	0.321893			YEL009C-A	#DIV/0!		YER149C	1263		YFL059W	0.372241
YFL050C	-3.58408		YDL160C-A	0.321938			YEL010W	#DIV/0!		YER150W	447		YFL060C	0.308055
YFL048C	0.504842		YLR407W	0.321948			YEL011W	8.05291		YER151C	2739		YFR001W	0.615617
YFL045C	0.909432		YPL007C	0.321952			YEL012W	5.68833		YER152C	1332		YFR002W	0.621362
YFL044C	0.365286		YBL016W	0.322005			YEL013W	5.14372		YER154W	1209		YFR003C	0.593051
YFL042C	-0.232871		YLR042C	0.322033			YEL014C	2.93182		YER155C	6504		YFR004W	1.27827
YFL039C	0.592905		YDL045W-A	0.322043			YEL015W	3.38607		YER156C	1017		YFR005C	0.210941
YFL038C	1.1039		YOR297C	0.322065			YEL016C	2.21514		YER157W	2406		YFR006W	0.914462
YFL034C-B	0.707692		YJL193W	0.322069			YEL017C-A	10.3401		YER158C	1722		YFR007W	0.322868
YFL034C-A	1.53689		YOR169C	0.322084			YEL017W	3.90884		YER158W-A	216		YFR008W	0.251517
YFL033C	-1.4586		YAR018C	0.32212			YEL018C-A	1.04924		YER159C	429		YFR009W	0.552918
YFL029C	0.199597		YOR339C	0.322145			YEL018W	2.78302		YER161C	1002		YFR010W	1.1534
YFL028C	0.552572		YOR156C	0.322175			YEL019C	2.86055		YER162C	2265		YFR011C	0.732666
YFL027C	-0.644574		YFL055W	0.322218			YEL020C	1.80198		YER163C	699		YFR012W	0.107364
YFL025C	-0.842905		YLR245C	0.32223			YEL020C-B	3.62368		YER164W	4407		YFR013W	0.441931
YFL024C	-0.951837		YOL148C	0.322231			YEL020W-A	3.29805		YER165W	1734		YFR014C	0.782074
YFL022C	0.705763		YEL072W	0.322265			YEL021W	4.92567		YER166W	4716		YFR015C	0.478804
YFL021C-A	-2.56137		YHR078W	0.322286			YEL022W	3.56399		YER167W	2556		YFR016C	0.288965
YFL020C	-0.583983		YIL102C	0.322315			YEL023C	4.23693		YER168C	1641		YFR017C	0.570977
YFL018C	0.759406		YPR066W	0.322379			YEL024W	4.52625		YER169W	2391		YFR019W	0.462344
YFL017C	0.931804		YDL087C	0.322473			YEL025C	3.77631		YER170W	678		YFR021W	0.299771
YFL016C	0.585197		YLR417W	0.32248			YEL026W	7.62113		YER171W	2337		YFR022W	0.294485
YFL013C	0.173516		YOR062C	0.322488			YEL027W	12.8358		YER172C	6492		YFR023W	0.0825862
YFL010C	1.54482		YJR101W	0.32249			YEL028W	#DIV/0!		YER173W	1980		YFR024C-A	1.12649
YFL003C	-0.828876		YNL023C	0.322495			YEL029C	3.14798		YER174C	735		YFR025C	0.507749
YFL002C	-0.00641234		YNL146C-A	0.322606			YEL030C-A	#DIV/0!		YER175C	900		YFR026C	0.119058
YFR003C	0.969986		YOL007C	0.322632			YEL030W	3.8009		YER175W-A	165		YFR027W	0.232114
YFR005C	-0.578631		YBR047W	0.322647			YEL031W	5.3821		YER176W	3366		YFR028C	0.504261
YFR011C	0.540551		YNL100W	0.322678			YEL032C-A	#DIV/0!		YER177W	804		YFR029W	0.38727
YFR014C	0.122963		YGL014C-A	0.322681			YEL032W	2.97301		YER178W	1263		YFR030W	2.60764
YFR015C	-0.0647505		YDL114W-A	0.322689			YEL033W	#DIV/0!		YER179W	1097		YFR031C	0.357958
YFR016C	-0.364136		YDR417C	0.322691			YEL034C-A	8.28193		YER180C	804		YFR031C-A	4.00833
YFR017C	-0.412482		YJL025W	0.322698			YEL034W	8.37889		YER180C-A	258		YFR032C	0.011244
YFR018C	-0.228584		YPL067C	0.322739			YEL035C	#DIV/0!		YER181C	324		YFR032C-A	1.58048
YFR024C-A	0.484478		YEL018W	0.322755			YEL036C	2.84586		YER182W	735		YFR033C	3.10848
YFR025C	-0.0290201		YGR270C-A	0.322831			YEL037C	7.0416		YER183C	636		YFR034C	0.351415
YFR026C	-2.60618		YGR077C	0.322914			YEL038W	9.95395		YER184C	2385		YFR036W	0.214934
YFR028C	-0.161901		YOL013C	0.322977			YEL039C	#DIV/0!		YER186C	921		YFR037C	1.14138
YFR031C	-1.10461		YDR275W	0.322981			YEL040W	2.36334		YER187W	426		YFR038W	0.460572
YFR031C-A	1.18854		YPL074W	0.322989			YEL041W	#DIV/0!		YER188C-A	300		YFR039C	0.515517
YFR032C-A	1.13539		YBL033C	0.323076			YEL042W	6.49994		YER188W	720		YFR040W	0.773299
YFR033C	0.372866		YLL005C	0.323086			YEL043W	2.72211		YFL001W	1329		YFR041C	0.472676
YFR034C	0.558646		YDR370C	0.3231			YEL044W	8.94939		YFL002C	1821		YFR042W	0.312118
YFR037C	0.515527		YJL006C	0.323129			YEL045C	#DIV/0!		YFL003C	2637		YFR043C	0.326829
YFR039C	-0.1071		YPR101W	0.323158			YEL046C	2.81275		YFL004W	2487		YFR044C	1.02401
YFR041C	0.984698		YMR065W	0.323159			YEL047C	9.74989		YFL005W	648		YFR045W	0.394256
YFR043C	0.528119		YJL127C	0.323161			YEL048C	2.40301		YFL007W	6432		YFR046C	0.277838
YFR044C	0.538091		YMR179W	0.323165			YEL049W	1.78021		YFL008W	3678		YFR047C	0.715166
YFR046C	-0.435425		YML116W	0.323193			YEL050C	6.6598		YFL009W	2340		YFR048W	0.281278
YFR047C	0.96747		YNL329C	0.323203			YEL050W-A	8.36089		YFL010C	636		YFR049W	0.860227
YFR050C	0.685293		YPL162C	0.323207			YEL051W	12.9829		YFL010W-A	285		YFR050C	1.78873
YFR051C	0.295736		YLL047W	0.323231			YEL052W	6.79185		YFL011W	1641		YFR051C	0.867122
YFR053C	0.932839		YKL119C	0.32326			YEL053C	4.45588		YFL012W	447		YFR052W	0.992802
YFL055W	-1.15596		YJR010C-A	0.323261			YEL053W-A	#DIV/0!		YFL012W-A	375		YFR053C	6.46759
YFL053W	-0.951784		YDL206W	0.323263			YEL054C	10.316		YFL013C	2079		YFR055W	0.121309
YFL052W	-0.555718		YHR017W	0.323268			YEL055C	5.59212		YFL014W	330		YGL001C	1.04511
YFL049W	-0.0690235		YDR306C	0.323268			YEL056W	4.93254		YFL016C	1536		YGL002W	0.418461
YFL047W	-0.426702		YNR063W	0.323296			YEL057C	#DIV/0!		YFL017C	480		YGL003C	0.461018
YFL046W	0.194723		YDR061W	0.32332			YEL058W	9.74485		YFL017W-A	234		YGL004C	0.34655
YFL041W-A	-4.39787		YDR249C	0.323364			YEL059C-A	8.20375		YFL018C	1500		YGL005C	0.58543
YFL041W	0.162003		YLL030C	0.323371			YEL059W	#DIV/0!		YFL020C	369		YGL006W	1.24827
YFL037W	0.368722		YDR240C	0.323374			YEL060C	9.99605		YFL021C-A	855		YGL008C	7.08723
YFL036W	-0.548823		YNL056W	0.323414			YEL061C	1.6746		YFL021W	1533		YGL009C	2.45503
YFL034W	-0.885792		YPL264C	0.323433			YEL062W	2.00461		YFL022C	1512		YGL010W	0.503733
YFL031W	-2.99563		YOR104W	0.323433			YEL063C	2.24601		YFL023W	2391		YGL011C	1.67711
YFL030W	-0.862126		YHR062C	0.323447			YEL064C	2.39742		YFL024C	2499		YGL012W	1.66253
YFL026W	0.0984783		YLR084C	0.323463			YEL065W	2.15239		YFL025C	3090		YGL013C	0.769241
YFL023W	0.128035		YOR030W	0.323511			YEL066W	13.1004		YFL026W	1296		YGL014W	0.72507
YFL021W	-0.261617		YHR102W	0.323512			YEL067C	#DIV/0!		YFL027C	1494		YGL015C	0.0190694
YFL017W-A	1.48371		YGL263W	0.323514			YEL068C	6.53796		YFL028C	870		YGL016W	0.294784
YFL014W	1.18659		YCR073W-A	0.323519			YEL069C	#DIV/0!		YFL029C	1107		YGL017W	0.236874
YFL011W	-0.331707		YOR055W	0.323527			YEL070W	#DIV/0!		YFL030W	1158		YGL018C	0.282757
YFL009W	-0.201016		YNL164C	0.323544			YEL071W	5.67603		YFL031W	969		YGL019W	0.698972
YFL008W	-0.384075		YIL009C-A	0.32356			YEL072W	6.15771		YFL033C	5313		YGL020C	0.512625
YFL007W	-1.27922		YOL068C	0.323582			YEL073C	3.74624		YFL034C-A	690		YGL021W	0.502037
YFL005W	0.783988		YKR100C	0.323596			YEL074W	4.09942		YFL034C-B	978		YGL022W	1.23433
YFL004W	-0.122349		YDL009C	0.323617			YEL075C	2.46261		YFL034W	3222		YGL023C	0.794077
YFL001W	0.128116		YCR018C-A	0.323634			YEL075W-A	3.06107		YFL036W	4056		YGL025C	0.351577
YFR001W	0.495554		YLR064W	0.323637			YEL076C	2.133		YFL037W	1374		YGL026C	1.7495
YFR002W	-0.105437		YKL068W	0.323641			YEL077C	3.46884		YFL038C	621		YGL027C	0.56495
YFR004W	0.943716		YDR436W	0.323648			YEL077W-A	3.4985		YFL039C	1437		YGL028C	0.576197
YFR006W	0.493646		YPL181W	0.323656			YER001W	2.7859		YFL041W	1869		YGL029W	0.290828
YFR007W	0.341399		YDR323C	0.323667			YER002W	2.9776		YFL041W-A	192		YGL030W	1.70303
YFR008W	0.512386		YHR195W	0.323716			YER003C	12.6927		YFL042C	2025		YGL031C	2.52239
YFR009W	0.234912		YLR127C	0.323731			YER004W	14.718		YFL044C	906		YGL032C	0.43553
YFR010W	0.639048		YGR217W	0.32374			YER005W	2.7526		YFL045C	765		YGL033W	0.0590538
YFR013W	-0.171809		YPL027W	0.323748			YER006C-A	#DIV/0!		YFL046W	624		YGL035C	0.871912
YFR019W	-1.76917		YDR110W	0.323822			YER006W	5.26791		YFL047W	2145		YGL036W	0.581339
YFR020W	-0.810956		YMR070W	0.323832			YER007C-A	10.1337		YFL048C	1338		YGL037C	2.92473
YFR021W	0.0711886		YDR286C	0.323834			YER007W	2.08961		YFL049W	1872		YGL038C	0.585489
YFR022W	-2.11563		YJL071W	0.323846			YER008C	3.12171		YFL050C	2577		YGL039W	0.217762
YFR023W	0.137204		YLR396C	0.323854			YER009W	21.9307		YFL052W	1398		YGL040C	0.987817
YFR027W	0.627222		YIR010W	0.323876			YER010C	8.49944		YFL053W	1776		YGL041W-A	0.389265
YFR029W	-0.838976		YGR183C	0.323878			YER011W	#DIV/0!		YFL054C	1941		YGL043W	0.512113
YFR030W	-0.382709		YBR230W-A	0.323903			YER012W	6.79483		YFL055W	1677		YGL044C	0.368867
YFR034W-A	-0.115567		YNL122C	0.323925			YER013W	1.78735		YFL057C	459		YGL045W	0.351696
YFR038W	-0.854814		YIR015W	0.323955			YER014C-A	#DIV/0!		YFR001W	615		YGL047W	0.353263
YFR040W	-0.612329		YJL065C	0.323982			YER014W	7.02302		YFR002W	2520		YGL048C	1.63915
YFR042W	0.638338		YIL042C	0.323991			YER015W	3.78225		YFR003C	468		YGL049C	0.410942
YFR045W	0.84905		YPR042C	0.32401			YER016W	3.97977		YFR004W	921		YGL050W	0.33945
YFR048W	-0.3121		YDL035C	0.324073			YER017C	4.7913		YFR005C	1347		YGL054C	0.870378
YFR049W	0.666176		YGR122W	0.32409			YER018C	6.34347		YFR006W	1608		YGL055W	8.30144
YFR052W	0.759059		YIL156W-B	0.324107			YER019C-A	10.3521		YFR007W	1062		YGL056C	0.924437
YFR055W	0.301297		YDR078C	0.324131			YER019W	4.85966		YFR008W	666		YGL057C	0.245983
YGL257C	-1.17355		YNR069C	0.324147			YER020W	4.42543		YFR009W	2259		YGL058W	0.433975
YGL252C	-0.23306		YOR113W	0.324165			YER021W	4.46503		YFR010W	1500		YGL059W	0.678427
YGL251C	-2.72327		YOL099C	0.324179			YER022W	3.0237		YFR010W-A	189		YGL060W	0.313718
YGL246C	0.00635623		YKL137W	0.324179			YER023C-A	#DIV/0!		YFR011C	513		YGL061C	0.287613
YGL242C	0.97574		YDR472W	0.324186			YER023W	17.0361		YFR013W	2364		YGL062W	2.36071
YGL237C	0.40301		YGL176C	0.324211			YER024W	6.69051		YFR014C	1341		YGL063W	0.178843
YGL236C	-0.434944		YGL102C	0.324212			YER025W	7.57493		YFR015C	2127		YGL064C	0.259295
YGL231C	0.733604		YNL128W	0.324212			YER026C	4.92338		YFR016C	3702		YGL065C	0.39814
YGL230C	0.301703		YLR128W	0.324216			YER027C	4.76657		YFR017C	588		YGL066W	0.506538
YGL229C	-1.56631		YER059W	0.324247			YER028C	4.10694		YFR018C	1092		YGL067W	0.327976
YGL226C-A	0.0287207		YHR181W	0.32426			YER029C	3.06001		YFR019W	6837		YGL068W	0.868811
YGL224C	-0.0902919		YGR109W-B	0.32428			YER030W	13.4762		YFR020W	699		YGL070C	0.304932
YGL223C	0.0535201		YPL250W-A	0.324286			YER031C	10.1044		YFR021W	1503		YGL071W	0.269842
YGL222C	0.900876		YDR493W	0.324302			YER032W	1.85916		YFR022W	2202		YGL073W	0.818819
YGL221C	0.575886		YOR013W	0.324303			YER033C	2.58545		YFR023W	1836		YGL075C	0.181299
YGL219C	-0.378143		YMR137C	0.32431			YER034W	2.93801		YFR024C-A	1474		YGL076C	3.26263
YGL213C	0.408047		YKL174C	0.324356			YER035W	5.32708		YFR025C	1008		YGL077C	1.36897
YGL206C	-0.107393		YGL127C	0.324386			YER036C	6.93137		YFR026C	510		YGL078C	0.711392
YGL204C	-1.90203		YER134C	0.324388			YER037W	4.83827		YFR027W	846		YGL079W	0.279283
YGL203C	0.310194		YDR149C	0.324401			YER038C	4.45932		YFR028C	1656		YGL080W	0.762905
YGL201C	-0.259503		YLR436C	0.324411			YER038W-A	#DIV/0!		YFR029W	2037		YGL081W	0.153685
YGL200C	0.691486		YDR104C	0.324437			YER039C	5.66508		YFR030W	3108		YGL082W	0.547505
YGL199C	-1.80768		YJR127C	0.324457			YER039C-A	3.31674		YFR031C	3513		YGL083W	0.321013
YGL194C-A	-0.29842		YOL105C	0.324468			YER040W	1.88987		YFR031C-A	912		YGL084C	0.610355
YGL194C	0.148582		YGR153W	0.324493			YER041W	2.82651		YFR032C-A	180		YGL085W	0.320467
YGL193C	-8.21942		YDR437W	0.324506			YER042W	#DIV/0!		YFR033C	444		YGL086W	0.413006
YGL190C	-0.676939		YKL146W	0.324522			YER043C	19.5946		YFR034C	939		YGL087C	0.558964
YGL189C	0.860186		YPR057W	0.324538			YER044C	6.6999		YFR034W-A	288		YGL089C	0.0815128
YGL187C	1.05333		YBR255W	0.324542			YER044C-A	#DIV/0!		YFR037C	1674		YGL090W	0.281813
YGL186C	0.776193		YDR439W	0.324576			YER045C	2.58489		YFR038W	2562		YGL091C	0.421877
YGL185C	0.127454		YBL082C	0.324613			YER046W	2.36286		YFR039C	1533		YGL092W	0.606476
YGL184C	0.784421		YOL053W	0.324625			YER046W-A	#DIV/0!		YFR040W	3009		YGL093W	0.518857
YGL179C	-0.319054		YBR125C	0.324633			YER047C	2.05794		YFR041C	888		YGL094C	0.466953
YGL176C	-2.28415		YLR157W-E	0.324641			YER048C	10.5281		YFR042W	603		YGL095C	0.457306
YGL175C	-0.933877		YJL051W	0.324656			YER048W-A	6.41156		YFR043C	714		YGL096W	0.488057
YGL173C	-0.348047		YJL089W	0.324671			YER049W	5.12789		YFR044C	1446		YGL097W	0.574185
YGL167C	-0.678309		YGR102C	0.324671			YER050C	8.57012		YFR045W	1002		YGL098W	0.350033
YGL165C	-6.36699		YOR269W	0.324727			YER051W	2.08404		YFR046C	1086		YGL099W	0.433361
YGL164C	0.50897		YBR211C	0.324738			YER052C	5.24242		YFR047C	888		YGL100W	0.594663
YGL163C	-0.677493		YML083C	0.324739			YER053C	5.50868		YFR048W	1989		YGL101W	0.325063
YGL161C	0.449018		YLR176C	0.32475			YER053C-A	#DIV/0!		YFR049W	372		YGL103W	4.35073
YGL154C	-0.203414		YDR511W	0.324896			YER054C	#DIV/0!		YFR050C	801		YGL104C	0.328657
YGL150C	-1.44569		YOL108C	0.324902			YER055C	7.94561		YFR051C	1641		YGL105W	1.25694
YGL147C	0.961895		YMR100W	0.324909			YER056C	1.83744		YFR052W	825		YGL106W	0.729958
YGL146C	-1.87446		YBR076W	0.324922			YER056C-A	13.8983		YFR053C	1458		YGL107C	0.582403
YGL144C	-1.31895		YGL258W-A	0.324935			YER057C	33.0997		YFR054C	579		YGL108C	0.297644
YGL143C	-0.325147		YDR520C	0.324958			YER058W	#DIV/0!		YFR055W	1023		YGL110C	0.443502
YGL142C	-0.598448		YPR170W-B	0.324978			YER059W	4.34808		YGL001C	1050		YGL111W	0.474057
YGL140C	-1.05225		YOR299W	0.324991			YER060W	4.13496		YGL002W	651		YGL112C	0.603544
YGL136C	-0.853054		YLR054C	0.325004			YER060W-A	1.96259		YGL003C	1701		YGL113W	0.269314
YGL131C	-2.02985		YIR020W-A	0.325059			YER061C	3.74104		YGL004C	1254		YGL114W	0.662509
YGL129C	0.180562		YFR042W	0.325063			YER062C	8.86221		YGL005C	840		YGL115W	0.565861
YGL128C	0.0958048		YKL093W	0.325078			YER063W	6.98747		YGL006W	3522		YGL116W	0.361965
YGL127C	0.72651		YOR017W	0.325091			YER064C	2.14831		YGL006W-A	111		YGL117W	0.903208
YGL124C	-0.934861		YLR016C	0.32511			YER065C	5.07529		YGL007C-A	87		YGL119W	0.348499
YGL122C	1.1366		YLR007W	0.325121			YER066C-A	#DIV/0!		YGL007W	378		YGL120C	0.627781
YGL121C	-0.241615		YNR068C	0.325143			YER066W	3.09937		YGL008C	2757		YGL121C	1.21952
YGL120C	0.23519		YJR046W	0.325144			YER067C-A	#DIV/0!		YGL009C	2340		YGL122C	0.737121
YGL112C	0.115774		YGL023C	0.32519			YER067W	20.2145		YGL010W	525		YGL123W	5.34402
YGL110C	0.203387		YDL217C	0.325199			YER068C-A	#DIV/0!		YGL011C	759		YGL124C	0.397143
YGL108C	0.0982766		YDR379W	0.325201			YER068W	2.55793		YGL012W	1422		YGL125W	1.10509
YGL107C	0.0462125		YMR053C	0.325212			YER069W	5.86623		YGL013C	3207		YGL126W	0.279312
YGL104C	-0.0980501		YDR239C	0.325224			YER070W	1.57306		YGL014W	2667		YGL127C	0.248998
YGL095C	-0.263699		YLR360W	0.325234			YER071C	5.7207		YGL015C	393		YGL128C	0.231219
YGL094C	-2.03506		YJL003W	0.325293			YER072W	9.64086		YGL016W	3246		YGL129C	0.582073
YGL091C	0.760689		YCR060W	0.325296			YER073W	1.69186		YGL017W	1512		YGL130W	0.508811
YGL089C	0.245654		YMR167W	0.325313			YER074W	18.5264		YGL018C	555		YGL131C	0.326555
YGL087C	1.24722		YGL194C	0.325317			YER074W-A	5.71473		YGL019W	837		YGL133W	0.531578
YGL084C	0.159224		YJL132W	0.325321			YER075C	1.48619		YGL020C	708		YGL134W	0.463784
YGL078C	0.657601		YMR017W	0.325326			YER076C	3.66839		YGL021W	2283		YGL136C	0.360909
YGL077C	-0.0628999		YLL014W	0.325343			YER076W-A	#DIV/0!		YGL022W	2157		YGL137W	1.18518
YGL076C	1.0559		YOR365C	0.325351			YER077C	2.37426		YGL023C	1908		YGL138C	0.00744673
YGL075C	-1.0152		YDL138W	0.325367			YER078C	6.12262		YGL025C	1194		YGL139W	0.772732
YGL072C	-3.29927		YMR088C	0.325383			YER078W-A	7.65938		YGL026C	2124		YGL140C	0.494095
YGL070C	0.616526		YCL024W	0.325402			YER079C-A	#DIV/0!		YGL027C	2502		YGL141W	0.519336
YGL065C	0.237602		YCL051W	0.325408			YER079W	7.70278		YGL028C	1629		YGL142C	0.410515
YGL064C	0.378951		YDL007C-A	0.325422			YER080W	6.80389		YGL029W	363		YGL143C	0.432135
YGL061C	0.646693		YKL011C	0.325456			YER081W	8.87899		YGL030W	548		YGL144C	0.265564
YGL057C	0.0904884		YLR157W-D	0.325479			YER082C	3.79105		YGL031C	468		YGL145W	0.473806
YGL056C	0.531245		YOR034C	0.325505			YER083C	6.776		YGL032C	264		YGL146C	0.271403
YGL054C	0.579831		YCL046W	0.325525			YER084W	#DIV/0!		YGL033W	727		YGL147C	1.749
YGL049C	0.202776		YER104W	0.325528			YER084W-A	#DIV/0!		YGL035C	1515		YGL148W	1.38319
YGL048C	0.466775		YCL007C	0.325539			YER085C	#DIV/0!		YGL036W	2730		YGL150C	0.706049
YGL044C	0.675957		YDR264C	0.325563			YER086W	9.165		YGL037C	651		YGL151W	0.450206
YGL040C	0.602191		YDR140W	0.32557			YER087C-A	0.905698		YGL038C	1443		YGL153W	0.494483
YGL038C	0.178368		YHR149C	0.32559			YER087C-B	12.6419		YGL039W	1047		YGL154C	0.373971
YGL037C	1.13243		YBR165W	0.325599			YER087W	4.38695		YGL040C	1029		YGL155W	0.341605
YGL035C	0.252761		YPL138C	0.325626			YER088C	3.57749		YGL041W-A	465		YGL156W	1.85859
YGL032C	0.797795		YHR185C	0.325644			YER088C-A	6.65514		YGL043W	930		YGL157W	0.103385
YGL031C	0.973838		YPL150W	0.325654			YER088W-B	#DIV/0!		YGL044C	891		YGL158W	0.0184514
YGL028C	0.285657		YLR459W	0.325665			YER089C	6.3337		YGL045W	1629		YGL159W	0.316162
YGL027C	0.0164833		YOL003C	0.325672			YER090C-A	#DIV/0!		YGL047W	609		YGL160W	0.789057
YGL026C	0.671503		YNR041C	0.325688			YER090W	9.32813		YGL048C	1218		YGL161C	0.756946
YGL025C	0.704168		YHL045W	0.325707			YER091C	9.40539		YGL049C	2745		YGL162W	0.142819
YGL023C	-0.613662		YKL220C	0.32571			YER091C-A	#DIV/0!		YGL050W	822		YGL163C	0.427872
YGL020C	0.727956		YOR218C	0.32571			YER092W	#DIV/0!		YGL054C	417		YGL164C	0.352026
YGL018C	0.522948		YPR116W	0.32575			YER093C	1.70009		YGL055W	1533		YGL166W	0.31875
YGL013C	-0.718911		YHL002C-A	0.325756			YER093C-A	5.63504		YGL056C	1584		YGL167C	0.956899
YGL011C	0.528821		YJL005W	0.325784			YER094C	8.20511		YGL057C	864		YGL169W	0.394168
YGL009C	0.29442		YDL152W	0.325784			YER095W	3.06411		YGL058W	519		YGL170C	0.0648665
YGL008C	0.0910346		YDR510C-A	0.325834			YER096W	6.96218		YGL059W	1476		YGL171W	0.396089
YGL007C-A	-4.92289		YMR206W	0.325834			YER097W	#DIV/0!		YGL060W	1926		YGL172W	0.507428
YGL005C	0.0336282		YOR025W	0.325853			YER098W	2.40005		YGL061C	744		YGL173C	1.25028
YGL004C	-0.0370889		YBR133C	0.325869			YER099C	5.34414		YGL062W	3537		YGL174W	0.223122
YGL003C	-0.299846		YLR151C	0.32588			YER100W	4.76887		YGL063C-A	150		YGL175C	0.103596
YGL001C	0.475149		YJL063C	0.325904			YER101C	3.84558		YGL063W	1113		YGL176C	0.262819
YGR001C	0.504568		YKR030W	0.325906			YER102W	17.5405		YGL064C	1686		YGL178W	0.44317
YGR002C	-0.0156109		YML031W	0.325913			YER103W	#DIV/0!		YGL065C	1512		YGL179C	0.181558
YGR005C	0.589289		YHR045W	0.325922			YER104W	2.77102		YGL066W	1974		YGL180W	0.687183
YGR008C	1.07336		YBR246W	0.325924			YER105C	4.40724		YGL067W	1155		YGL181W	0.543333
YGR009C	0.472358		YOL101C	0.325932			YER106W	#DIV/0!		YGL068W	585		YGL183C	0.0813339
YGR015C	-0.691561		YIR023W	0.325943			YER107C	4.23379		YGL070C	369		YGL184C	1.00114
YGR020C	0.445785		YIL004C	0.325997			YER107W-A	3.82253		YGL071W	2073		YGL185C	0.399261
YGR024C	-0.404402		YLR405W	0.326005			YER109C	1.96049		YGL072C	360		YGL186C	0.635529
YGR027C	0.497695		YOR003W	0.32601			YER110C	8.20857		YGL073W	2502		YGL187C	2.33781
YGR030C	0.884133		YPL161C	0.326017			YER111C	2.06343		YGL075C	1164		YGL189C	3.32699
YGR033C	-0.247158		YHL048W	0.326019			YER112W	4.48882		YGL076C	1662		YGL190C	0.600419
YGR035C	0.244764		YNL057W	0.326026			YER113C	1.82828		YGL077C	1692		YGL191W	2.45681
YGR036C	-0.380349		YEL052W	0.326059			YER114C	3.19201		YGL078C	1572		YGL192W	0.625509
YGR037C	1.01229		YGR141W	0.326062			YER115C	4.08281		YGL079W	657		YGL194C	0.178355
YGR043C	0.0515761		YDL076C	0.326091			YER116C	4.08657		YGL080W	393		YGL194C-A	0.171048
YGR044C	-0.0956487		YOR220W	0.326114			YER117W	15.2847		YGL081W	963		YGL195W	0.637618
YGR045C	-2.10197		YDL109C	0.326136			YER118C	4.43908		YGL082W	1146		YGL196W	0.762743
YGR047C	-0.121983		YBR044C	0.326187			YER119C	5.13161		YGL083W	2415		YGL197W	0.86158
YGR050C	-0.292521		YHL008C	0.326193			YER119C-A	#DIV/0!		YGL084C	1683		YGL198W	0.466493
YGR053C	0.225258		YKL098W	0.326236			YER120W	12.7694		YGL085W	825		YGL200C	1.25441
YGR057C	-1.44575		YCR023C	0.32626			YER121W	#DIV/0!		YGL086W	2250		YGL201C	0.547244
YGR061C	-0.383784		YIL082W-A	0.326271			YER122C	4.88493		YGL087C	499		YGL202W	1.79563
YGR062C	-0.59536		YOR026W	0.326279			YER123W	1.58803		YGL088W	366		YGL203C	0.576553
YGR063C	1.17096		YMR122C	0.326293			YER124C	2.18722		YGL089C	363		YGL205W	3.14345
YGR065C	-0.240221		YIR032C	0.326334			YER125W	5.76603		YGL090W	1266		YGL206C	0.889592
YGR067C	-1.04624		YAL028W	0.326351			YER126C	2.53619		YGL091C	987		YGL207W	1.35111
YGR068C	-0.985509		YPR023C	0.326362			YER127W	2.45166		YGL092W	3954		YGL208W	0.631855
YGR071C	-0.905363		YDR466W	0.326411			YER128W	4.74579		YGL093W	2754		YGL209W	0.243128
YGR073C	-7.749		YDR198C	0.326417			YER129W	1.67773		YGL094C	3348		YGL210W	0.506705
YGR075C	0.578565		YOR372C	0.326424			YER130C	1.93803		YGL095C	1734		YGL211W	0.430284
YGR076C	1.19697		YGL017W	0.326431			YER131W	12.6002		YGL096W	831		YGL212W	0.169166
YGR077C	-0.98641		YLR047C	0.326442			YER132C	1.74011		YGL097W	1449		YGL213C	0.498605
YGR078C	1.12229		YJL175W	0.326443			YER133W	5.0374		YGL098W	738		YGL215W	0.860224
YGR081C	0.633929		YLR035C	0.326452			YER133W-A	6.19198		YGL099W	1923		YGL216W	0.274378
YGR083C	0.217566		YPR204W	0.326453			YER134C	6.31826		YGL100W	1050		YGL219C	0.932112
YGR084C	0.472058		YKR061W	0.326466			YER135C	#DIV/0!		YGL101W	648		YGL220W	0.45055
YGR085C	1.12543		YBR168W	0.326471			YER136W	5.878		YGL103W	961		YGL221C	0.652274
YGR086C	0.802134		YNL180C	0.326474			YER137C	2.94817		YGL104C	1461		YGL222C	0.135206
YGR087C	5.67555		YOL129W	0.326477			YER137W-A	#DIV/0!		YGL105W	1131		YGL223C	0.438312
YGR095C	0.529935		YHR050W-A	0.326485			YER138W-A	5.90988		YGL106W	450		YGL224C	0.626387
YGR098C	-2.17714		YPL017C	0.326488			YER139C	3.80461		YGL107C	1941		YGL225W	0.380313
YGR102C	-0.21026		YOL017W	0.326493			YER140W	2.10875		YGL108C	423		YGL226C-A	0.491407
YGR104C	0.278661		YDR137W	0.326495			YER141W	5.31428		YGL109W	324		YGL226W	0.268563
YGR106C	0.43499		YBR217W	0.326495			YER142C	#DIV/0!		YGL110C	1875		YGL227W	0.55224
YGR109C	0.356504		YKL076C	0.326531			YER143W	6.26204		YGL111W	1392		YGL228W	1.08696
YGR117C	-0.227394		YCR047C	0.326573			YER144C	2.35268		YGL112C	1551		YGL229C	0.133936
YGR119C	0.343807		YPL213W	0.326575			YER145C	3.60767		YGL113W	2007		YGL230C	0.0632893
YGR120C	0.0511861		YPR200C	0.326578			YER145C-A	#DIV/0!		YGL114W	2178		YGL231C	0.564514
YGR121C	-0.345557		YER132C	0.326583			YER146W	4.8896		YGL115W	969		YGL232W	0.373886
YGR122C-A	-2.38514		YIL079C	0.326585			YER147C	2.02028		YGL116W	1833		YGL233W	0.372045
YGR123C	0.333001		YDR084C	0.326585			YER147C-A	4.08275		YGL117W	798		YGL234W	2.21248
YGR128C	0.111977		YDR259C	0.326612			YER148W	5.38462		YGL119W	1506		YGL236C	0.500412
YGR130C	0.777833		YJL103C	0.326637			YER148W-A	#DIV/0!		YGL120C	2304		YGL237C	0.380936
YGR132C	0.53199		YDR262W	0.326638			YER149C	3.73296		YGL121C	381		YGL238W	0.750658
YGR138C	0.55287		YGR295C	0.326638			YER150W	19.2359		YGL122C	1578		YGL240W	0.103835
YGR146C	-0.811625		YLR222C-A	0.326644			YER151C	3.54491		YGL123W	765		YGL241W	0.373878
YGR146C-A	-2.44328		YPL201C	0.326661			YER152C	10.0293		YGL124C	1935		YGL242C	0.424284
YGR147C	0.182858		YBR290W	0.326665			YER152W-A	#DIV/0!		YGL125W	1803		YGL243W	0.285374
YGR148C	0.983073		YIL062C	0.326689			YER153C	8.20673		YGL127C	384		YGL244W	0.842626
YGR150C	-1.14068		YBR083W	0.326692			YER154W	5.464		YGL128C	852		YGL245W	1.27337
YGR154C	-2.48988		YER010C	0.326706			YER155C	3.87495		YGL129C	1353		YGL246C	0.328952
YGR158C	0.508558		YJR039W	0.326709			YER156C	5.64731		YGL130W	1380		YGL247W	0.243894
YGR159C	0.786481		YJL141C	0.326728			YER157W	2.25633		YGL131C	4212		YGL248W	0.525694
YGR161C	1.2009		YER109C	0.326744			YER158C	3.38605		YGL133W	3795		YGL249W	0.257769
YGR168C	-0.758767		YFL066C	0.326751			YER158W-A	3.18324		YGL134W	1302		YGL250W	0.383247
YGR169C	-0.427832		YEL053W-A	0.326757			YER159C	2.20035		YGL135W	654		YGL251C	0.30244
YGR169C-A	0.31142		YOR308C	0.326765			YER161C	3.58471		YGL136C	963		YGL252C	0.753098
YGR171C	-0.509666		YCR047W-A	0.326786			YER162C	1.07682		YGL137W	2870		YGL253W	2.06371
YGR172C	0.492848		YPL008W	0.326798			YER163C	9.89963		YGL139W	2409		YGL254W	0.319187
YGR174C	0.802234		YAL013W	0.326798			YER164W	2.6291		YGL140C	3660		YGL255W	1.97057
YGR175C	0.803217		YPR095C	0.326803			YER165C-A	#DIV/0!		YGL141W	2733		YGL256W	0.360639
YGR177C	-0.000979553		YGL243W	0.326835			YER165W	12.9374		YGL142C	1851		YGL257C	0.518971
YGR178C	0.0174252		YPL083C	0.326845			YER166W	3.79275		YGL143C	1242		YGL258W	0.056831
YGR179C	0.0896669		YGL219C	0.326879			YER167W	2.01259		YGL144C	2058		YGL262W	0.0863744
YGR180C	1.14027		YOR084W	0.326883			YER168C	2.9956		YGL145W	2106		YGL263W	0.0365368
YGR182C	-9.01978		YFL033C	0.326929			YER169W	1.35082		YGL146C	936		YGR001C	0.600025
YGR183C	0.675527		YLR431C	0.326956			YER170W	4.43709		YGL147C	576		YGR002C	0.369251
YGR184C	-1.38096		YHR194W	0.326975			YER171W	3.28933		YGL148W	1131		YGR003W	0.380523
YGR185C	0.694098		YLR422W	0.326986			YER172C	2.86309		YGL150C	4470		YGR004W	0.210653
YGR187C	0.87995		YOR289W	0.327006			YER172C-A	#DIV/0!		YGL151W	3399		YGR005C	0.705248
YGR188C	-0.848854		YMR211W	0.32701			YER173W	2.12674		YGL152C	678		YGR006W	0.144869
YGR189C	0.722304		YBL025W	0.327045			YER174C	4.11184		YGL153W	1026		YGR007W	0.472963
YGR192C	0.900529		YDR205W	0.32706			YER175C	8.03452		YGL154C	819		YGR008C	2.33167
YGR193C	0.729399		YPR185W	0.327073			YER175W-A	#DIV/0!		YGL155W	1131		YGR009C	0.674979
YGR194C	-0.0629655		YOR149C	0.327087			YER176W	2.64176		YGL156W	3252		YGR010W	0.562396
YGR196C	0.123585		YPL103C	0.327144			YER177W	11.0365		YGL157W	1044		YGR012W	0.481533
YGR197C	-0.416654		YMR135C	0.327146			YER178W	17.3657		YGL158W	1539		YGR013W	0.418462
YGR200C	-0.183903		YHR032C-A	0.327147			YER179W	8.91022		YGL159W	1113		YGR014W	1.15602
YGR201C	-1.72776		YHR192W	0.327156			YER180C	1.62883		YGL160W	1713		YGR015C	0.273712
YGR202C	0.343818		YPR171W	0.327174			YER180C-A	#DIV/0!		YGL161C	933		YGR016W	0.146717
YGR207C	0.902233		YLR425W	0.327177			YER181C	#DIV/0!		YGL162W	900		YGR017W	0.576342
YGR209C	1.12862		YLR079W	0.327189			YER182W	5.52738		YGL163C	2697		YGR019W	0.959288
YGR210C	0.362441		YKL068W-A	0.327191			YER183C	6.22641		YGL164C	1323		YGR020C	0.75582
YGR213C	-0.629965		YDR005C	0.327237			YER184C	3.51741		YGL165C	579		YGR021W	0.381672
YGR216C	-0.859582		YBR190W	0.327254			YER185W	#DIV/0!		YGL166W	678		YGR023W	0.165924
YGR220C	0.152353		YNL008C	0.327279			YER186C	5.67403		YGL167C	2853		YGR026W	0.883721
YGR221C	-2.51041		YNL319W	0.327282			YER187W	#DIV/0!		YGL169W	1281		YGR027C	3.03605
YGR223C	-0.487632		YHR160C	0.327295			YER188C-A	#DIV/0!		YGL171W	1695		YGR028W	0.501439
YGR229C	0.111406		YKR034W	0.327298			YER188W	#DIV/0!		YGL172W	1419		YGR029W	0.57813
YGR231C	0.59419		YKR021W	0.327298			YER189W	2.54444		YGL173C	4587		YGR030C	0.258111
YGR233C	-0.664788		YDL203C	0.327317			YFL001W	2.03146		YGL174W	801		YGR031W	0.518759
YGR235C	0.876062		YOR068C	0.327332			YFL002C	3.43812		YGL175C	1038		YGR032W	2.28896
YGR236C	-2.92171		YGR074W	0.327338			YFL003C	#DIV/0!		YGL176C	1665		YGR033C	0.787447
YGR237C	-0.0435888		YJR067C	0.327369			YFL004W	6.73107		YGL178W	3220		YGR034W	2.38975
YGR238C	-1.35228		YOR329C	0.327374			YFL005W	8.50595		YGL179C	1683		YGR035C	0.0590688
YGR239C	0.224388		YDL141W	0.327389			YFL007W	5.76986		YGL180W	2694		YGR036C	0.197623
YGR240C	0.262042		YCR089W	0.327394			YFL008W	2.9759		YGL181W	1191		YGR037C	1.56241
YGR241C	-0.240911		YML047C	0.32741			YFL009W	3.26161		YGL182C	324		YGR038W	0.405253
YGR244C	0.713745		YHR006W	0.327416			YFL010C	18.712		YGL184C	1398		YGR040W	0.37122
YGR245C	0.0118179		YDR217C	0.327418			YFL010W-A	20.0338		YGL185C	1140		YGR041W	0.283799
YGR246C	0.400774		YJR154W	0.327456			YFL011W	#DIV/0!		YGL186C	1740		YGR042W	0.329013
YGR250C	-0.0586198		YNL233W	0.327478			YFL012W	#DIV/0!		YGL187C	468		YGR043C	2.06138
YGR253C	0.78267		YHR124W	0.327488			YFL012W-A	#DIV/0!		YGL189C	360		YGR046W	0.816067
YGR255C	-0.436112		YPR104C	0.327493			YFL013C	2.6061		YGL190C	1581		YGR047C	0.382696
YGR257C	-1.23573		YAL014C	0.327507			YFL013W-A	2.21269		YGL191W	390		YGR048W	0.717578
YGR258C	-0.670378		YNL311C	0.327517			YFL014W	#DIV/0!		YGL192W	1803		YGR049W	1.16711
YGR259C	-4.97678		YLL035W	0.327534			YFL015C	#DIV/0!		YGL193C	312		YGR052W	0.413339
YGR261C	-0.466446		YHR061C	0.327551			YFL015W-A	#DIV/0!		YGL194C	1359		YGR053C	0.172801
YGR262C	0.502772		YPL066W	0.327554			YFL016C	6.74257		YGL194C-A	243		YGR054W	0.780747
YGR263C	0.188016		YNL133C	0.327574			YFL017C	5.38939		YGL195W	8019		YGR055W	0.797112
YGR264C	0.127407		YGR188C	0.327631			YFL017W-A	2.99845		YGL196W	1287		YGR056W	0.373918
YGR267C	0.370945		YBL088C	0.327668			YFL018C	9.91368		YGL197W	4464		YGR057C	0.306037
YGR268C	-0.22673		YML087C	0.327678			YFL019C	#DIV/0!		YGL198W	708		YGR058W	0.302662
YGR271C-A	0.971507		YDR524C	0.32768			YFL020C	#DIV/0!		YGL199C	471		YGR059W	0.0911303
YGR274C	-0.579589		YJL011C	0.327711			YFL021C-A	2.10727		YGL200C	612		YGR060W	11.4566
YGR276C	0.386598		YGL174W	0.327721			YFL021W	2.1983		YGL201C	3054		YGR061C	1.67382
YGR277C	0.447776		YOL046C	0.327727			YFL022C	10.1546		YGL202W	1503		YGR062C	0.303018
YGR279C	0.839881		YMR232W	0.327732			YFL023W	2.25294		YGL203C	2190		YGR063C	0.335444
YGR280C	0.123019		YCR018C	0.327769			YFL024C	2.16764		YGL204C	306		YGR065C	0.727047
YGR282C	0.81659		YAL024C	0.327786			YFL025C	2.05668		YGL205W	2247		YGR066C	0.132062
YGR283C	0.270279		YBR262C	0.327788			YFL026W	2.70485		YGL206C	4962		YGR067C	1.07749
YGR284C	0.673969		YGL251C	0.327789			YFL027C	2.23203		YGL207W	3108		YGR068C	0.232878
YGR285C	0.835409		YFL013W-A	0.327791			YFL028C	8.59494		YGL208W	1248		YGR070W	0.528343
YGR286C	0.46546		YER093C	0.327811			YFL029C	5.11831		YGL209W	1149		YGR071C	0.312347
YGR287C	-0.352229		YNL249C	0.327812			YFL030W	6.14451		YGL210W	669		YGR072W	0.358575
YGR289C	-3.65345		YHR011W	0.327823			YFL031C-A	10.4601		YGL211W	1080		YGR075C	0.279347
YGL258W	-1.35474		YJL047C	0.327832			YFL031W	11.8219		YGL212W	951		YGR076C	0.470527
YGL256W	-1.32732		YLR214W	0.327849			YFL032W	#DIV/0!		YGL213C	1194		YGR077C	0.429571
YGL255W	0.322055		YPR008W	0.327866			YFL033C	3.00644		YGL215W	1359		YGR078C	0.242241
YGL254W	-0.22539		YOR080W	0.327892			YFL034C-A	4.12224		YGL216W	2418		YGR079W	0.220259
YGL253W	0.608108		YCR032W	0.327894			YFL034C-B	2.62447		YGL218W	651		YGR080W	0.758933
YGL250W	0.483687		YKL110C	0.327916			YFL034W	1.94527		YGL219C	1380		YGR081C	0.248838
YGL248W	-0.25968		YKR038C	0.327939			YFL036W	3.34681		YGL220W	363		YGR082W	0.687087
YGL247W	0.0118493		YPL011C	0.327958			YFL037W	11.4613		YGL221C	867		YGR083C	0.569962
YGL245W	0.536209		YER185W	0.327959			YFL038C	12.2862		YGL222C	528		YGR084C	0.607666
YGL244W	0.69227		YLR424W	0.327994			YFL039C	16.5241		YGL223C	1254		YGR085C	3.49965
YGL243W	-0.813308		YPL098C	0.327995			YFL040W	#DIV/0!		YGL224C	843		YGR086C	5.53969
YGL241W	-0.1182		YLR402W	0.328033			YFL041W	5.1038		YGL225W	1014		YGR087C	0.756254
YGL240W	-0.23875		YHR109W	0.328093			YFL041W-A	#DIV/0!		YGL226C-A	410		YGR088W	1.03059
YGL238W	-0.401777		YGR093W	0.3281			YFL042C	4.88528		YGL226W	372		YGR089W	0.550482
YGL234W	0.523451		YOR255W	0.328115			YFL044C	8.71763		YGL227W	2877		YGR090W	0.653078
YGL233W	-0.849792		YOR263C	0.328147			YFL045C	11.8124		YGL228W	1734		YGR091W	0.299412
YGL232W	0.325875		YDR277C	0.328161			YFL046W	4.74738		YGL229C	2457		YGR092W	0.490016
YGL228W	0.348708		YBR074W	0.328161			YFL047W	3.41225		YGL230C	444		YGR093W	0.372547
YGL227W	-0.42947		YDL194W	0.328178			YFL048C	5.48583		YGL231C	573		YGR094W	2.0788
YGL226W	0.905069		YLR162W-A	0.328199			YFL049W	1.98518		YGL232W	928		YGR095C	0.395434
YGL225W	0.553326		YDR444W	0.328209			YFL050C	2.3314		YGL233W	2733		YGR096W	0.157312
YGL220W	0.378589		YMR023C	0.328224			YFL051C	#DIV/0!		YGL234W	2409		YGR097W	0.538888
YGL216W	-0.663922		YDR163W	0.328227			YFL052W	#DIV/0!		YGL236C	2010		YGR098C	0.300502
YGL215W	-2.85746		YDL010W	0.32824			YFL053W	#DIV/0!		YGL237C	798		YGR099W	0.361686
YGL212W	0.801619		YOR077W	0.328294			YFL054C	5.00827		YGL238W	2883		YGR100W	0.552422
YGL211W	-0.283439		YGL136C	0.328306			YFL055W	7.0763		YGL240W	753		YGR101W	0.54216
YGL210W	0.632487		YMR293C	0.328307			YFL056C	6.25947		YGL241W	3015		YGR102C	0.414861
YGL209W	0.284131		YDL024C	0.32838			YFL057C	10.0311		YGL242C	546		YGR103W	0.930696
YGL208W	0.283134		YCR061W	0.328386			YFL058W	#DIV/0!		YGL243W	1203		YGR104C	0.305819
YGL207W	0.173965		YBR124W	0.328386			YFL059W	6.55863		YGL244W	1677		YGR105W	0.394208
YGL205W	-1.11712		YHR139C-A	0.328395			YFL060C	5.75507		YGL245W	2127		YGR106C	1.1275
YGL202W	0.663642		YPR117W	0.328397			YFL061W	#DIV/0!		YGL246C	1164		YGR108W	0.490153
YGL198W	0.534574		YIL086C	0.32841			YFL062W	5.26031		YGL247W	594		YGR109C	0.109132
YGL197W	-1.63485		YDR499W	0.328439			YFL063W	#DIV/0!		YGL248W	1110		YGR109W-A	0.322953
YGL196W	-0.243512		YGL160W	0.328448			YFL064C	2.8821		YGL250W	726		YGR110W	0.608058
YGL195W	-0.728206		YIL003W	0.328457			YFL065C	#DIV/0!		YGL251C	3716		YGR111W	0.579699
YGL191W	1.21665		YBR147W	0.328465			YFL066C	2.96535		YGL252C	1767		YGR112W	0.498927
YGL181W	0.720031		YOR244W	0.328476			YFR001W	5.36444		YGL253W	1461		YGR113W	0.397478
YGL180W	-1.10244		YPL018W	0.328495			YFR002W	3.21341		YGL254W	900		YGR116W	1.03547
YGL178W	-1.15368		YLR053C	0.328499			YFR003C	9.83558		YGL255W	1131		YGR117C	0.440944
YGL174W	0.206216		YNL172W	0.328508			YFR004W	5.49703		YGL256W	1149		YGR118W	3.37323
YGL172W	0.499333		YLL003W	0.32851			YFR005C	3.24511		YGL257C	1677		YGR119C	0.791202
YGL171W	0.544082		YLR146W-A	0.328565			YFR006W	7.31252		YGL258W	621		YGR120C	0.252065
YGL169W	0.090985		YPL167C	0.328573			YFR007W	5.70371		YGL263W	1143		YGR121C	1.1607
YGL166W	0.241658		YGL134W	0.328575			YFR008W	5.2522		YGR001C	902		YGR122W	0.404418
YGL162W	-0.682176		YDL155W	0.328589			YFR009W	6.31147		YGR002C	1431		YGR123C	0.310163
YGL160W	-0.310346		YDR503C	0.328665			YFR009W-A	#DIV/0!		YGR003W	2235		YGR124W	1.56974
YGL159W	0.201231		YLR260W	0.328674			YFR010W	5.95646		YGR004W	1389		YGR126W	0.0948527
YGL158W	-1.81596		YNL034W	0.328676			YFR010W-A	6.5246		YGR005C	1203		YGR127W	0.639091
YGL157W	0.718868		YOL029C	0.328773			YFR011C	5.61232		YGR006W	756		YGR128C	0.452363
YGL156W	-0.37217		YCR100C	0.328793			YFR012W	#DIV/0!		YGR007W	972		YGR129W	0.169958
YGL155W	-0.750901		YBR188C	0.328814			YFR012W-A	#DIV/0!		YGR008C	255		YGR130C	1.97348
YGL153W	0.901804		YER169W	0.328816			YFR013W	3.5493		YGR009C	1956		YGR131W	0.119432
YGL151W	-0.703248		YHR034C	0.328831			YFR014C	5.98515		YGR012W	1182		YGR132C	1.62251
YGL148W	0.590679		YBL084C	0.328862			YFR015C	4.52214		YGR013W	1863		YGR133W	0.309803
YGL145W	-0.130803		YBR239C	0.328877			YFR016C	3.86941		YGR014W	3921		YGR134W	0.318374
YGL141W	-0.175808		YOR036W	0.328916			YFR017C	#DIV/0!		YGR015C	987		YGR135W	1.39537
YGL139W	-0.380477		YPL180W	0.328928			YFR018C	7.06281		YGR016W	573		YGR136W	0.638025
YGL137W	0.149236		YGR215W	0.328935			YFR019W	3.35127		YGR017W	894		YGR140W	0.375575
YGL135W	0.599188		YJR097W	0.328967			YFR020W	4.1079		YGR018C	330		YGR141W	0.550365
YGL134W	-0.976624		YDR332W	0.328967			YFR021W	2.66343		YGR019W	1416		YGR142W	1.61558
YGL133W	-1.04106		YDR389W	0.329012			YFR022W	2.14624		YGR020C	357		YGR143W	0.974004
YGL130W	0.597562		YDR419W	0.329069			YFR023W	#DIV/0!		YGR021W	873		YGR144W	0.479024
YGL125W	-0.0404674		YFR005C	0.329112			YFR024C-A	8.40806		YGR023W	1656		YGR145W	0.485982
YGL123W	0.856592		YLR152C	0.329141			YFR025C	7.79938		YGR024C	714		YGR146C	0.928658
YGL119W	0.316272		YGL216W	0.329166			YFR026C	#DIV/0!		YGR026W	837		YGR147C	0.592698
YGL117W	0.178676		YLR253W	0.329172			YFR027W	2.24179		YGR027C	327		YGR148C	2.07688
YGL116W	0.0747266		YHR178W	0.329193			YFR028C	2.92257		YGR028W	1089		YGR149W	0.537196
[truncated: 4,665 more rows]
