# Supplementary material for: Decapping factor Dcp2 controls mRNA abundance and translation to adjust metabolism and filamentation to nutrient availability
Source: eLife journal article supplement (doi:10.7554/elife.85545), 2023-06-02
Supplement: fig2-figsupp1-data1 [file Figure 2 – figure supplement 1 – source data 1.xlsx]

## Sheet: Celik et al 2015
id	log2FoldChange_WT_upf1	log2FoldChange_WT_upf2	log2FoldChange_WT_upf3
ETS1-1_ETS1-1_unspliced	-0.801003	-0.99311	0.189785
ETS1-2_ETS1-2_unspliced	-0.801003	-0.99311	0.189785
ETS2-1_ETS2-1_unspliced	NA	NA	NA
ETS2-2_ETS2-2_unspliced	NA	NA	NA
HRA1_HRA1	1.53448	1.90974	1.77826
ICR1_ICR1	2.85034	2.66021	2.62602
IRT1_IRT1	1.63873	1.77702	1.66687
ITS1-1_ITS1-1_unspliced	-1.21463	-1.28424	-0.167553
ITS1-2_ITS1-2_unspliced	-1.21463	-1.28424	-0.167553
ITS2-1_ITS2-1_unspliced	-1.03327	-2.37467	-3.0867
ITS2-2_ITS2-2_unspliced	-1.03327	-2.37467	-3.0867
LSR1_LSR1	-0.442415	-0.507443	0.19676
NME1_NME1	-0.568235	-0.764164	0.300742
NTS1-2_NTS1-2_unspliced	-0.452696	-0.424403	0.376025
NTS2-1_NTS2-1_unspliced	-0.816819	-0.917866	0.0820782
NTS2-2_NTS2-2_unspliced	-0.816819	-0.917866	0.0820782
PWR1_PWR1	0.887868	0.507779	0.71215
Q0010_Q0010	0.0171211	-0.764357	0.945256
Q0017_Q0017	0.221007	0.909826	1.32626
Q0020_15S_RRNA	-0.751134	-0.794591	-0.123047
Q0032_Q0032	-1.51118	#NAME?	-0.554815
Q0045_COX1	-0.252965	-0.348386	-0.17413
Q0045_COX1_unspliced	-0.263926	-0.0331301	0.411632
Q0050_AI1	-0.0538764	0.207349	0.235648
Q0055_AI2	-0.0970329	-0.0423766	0.141291
Q0055_AI2_unspliced	-0.190914	0.080598	0.0241921
Q0060_AI3	-2.08245	-1.47387	-1.26584
Q0060_AI3_unspliced	-0.239539	-0.182101	-0.93376
Q0065_AI4	0.0555781	0.150168	-0.224724
Q0065_AI4_unspliced	0.147724	-0.0678276	-0.552125
Q0070_AI5_ALPHA	NA	NA	NA
Q0070_AI5_ALPHA_unspliced	NA	NA	NA
Q0075_AI5_BETA	NA	NA	NA
Q0075_AI5_BETA_unspliced	NA	NA	NA
Q0080_ATP8	-0.412502	0.760017	1.85678
Q0085_ATP6	-0.154246	-0.118886	-0.0476347
Q0092_Q0092	NA	NA	NA
Q0105_COB	-0.300432	-0.372159	-0.192805
Q0105_COB_unspliced	-0.454883	-0.372026	-0.0248928
Q0110_BI2	0.255353	0.10897	0.529999
Q0110_BI2_unspliced	-0.365473	-0.0949148	0.650013
Q0115_BI3	NA	NA	NA
Q0115_BI3_unspliced	NA	NA	NA
Q0120_BI4	-0.244302	-0.23644	-0.339651
Q0120_BI4_unspliced	NA	NA	NA
Q0130_OLI1	-0.603763	-0.511204	-0.0349643
Q0140_VAR1	-1.00326	-0.74885	0.0666943
Q0142_Q0142	0.133581	0.136821	1.19539
Q0143_Q0143	-0.0530797	-0.344027	1.12963
Q0144_Q0144	#NAME?	#NAME?	0.0644086
Q0158_21S_RRNA	-0.631495	-0.753257	-0.721796
Q0158_21S_RRNA_unspliced	-0.711472	-0.51536	0.375309
Q0160_SCEI	-0.733428	-0.438484	0.776148
Q0182_Q0182	-0.625049	-0.374793	0.378373
Q0250_COX2	-0.227387	-0.181627	0.0198369
Q0255_Q0255	NA	NA	NA
Q0255_Q0255_unspliced	-0.411954	-0.584055	-0.293928
Q0275_COX3	-0.479084	-0.43526	-0.0409671
Q0285_RPM1	-0.299859	-0.403327	0.665075
Q0297_Q0297	-0.575436	-0.678086	0.267183
R0010W_FLP1	-1.35276	-0.961505	-2.13334
R0020C_REP1	-0.706489	-0.540814	-1.70201
R0030W_RAF1	1.63049	2.29588	-0.0485605
R0040C_REP2	0.147935	0.749074	-1.51539
RDN18-1_RDN18-1	0.495353	0.895287	0.384291
RDN18-2_RDN18-2	0.495353	0.895287	0.384291
RDN25-1_RDN25-1	1.75201	2.15701	1.41976
RDN25-2_RDN25-2	1.75201	2.15701	1.41976
RDN37-1_RDN37-1	-0.811077	2.5269	#NAME?
RDN37-1_RDN37-1_unspliced	-1.13573	-1.55306	-0.571761
RDN37-2_RDN37-2	-0.811077	2.5269	#NAME?
RDN37-2_RDN37-2_unspliced	-1.13573	-1.55306	-0.571761
RDN5-1_RDN5-1	-1.83533	-0.52791	0.881419
RDN5-2_RDN5-2	-0.838508	-0.551386	-0.971833
RDN5-3_RDN5-3	-0.838508	-0.551386	-0.971833
RDN5-4_RDN5-4	-0.838508	-0.551386	-0.971833
RDN5-5_RDN5-5	-0.838508	-0.551386	-0.971833
RDN5-6_RDN5-6	-1.83533	-0.52791	0.881419
RDN58-1_RDN58-1	-0.812354	-2.65915	-2.78338
RDN58-2_RDN58-2	-0.812354	-2.65915	-2.78338
RME2_RME2	3.03529	2.84223	2.80602
RME3_RME3	2.61177	2.46667	2.52603
RNA170_RNA170	-0.0229007	0.00580683	0.142049
RPR1_RPR1	-0.456656	-0.617257	0.294812
RUF20_RUF20	0.127596	-0.0344557	-0.00154722
RUF21_RUF21	1.32545	1.80636	1.50297
RUF22_RUF22	1.25108	-0.267529	2.98539
RUF23_RUF23	1.04469	1.33891	0.906767
RUF5-1_RUF5-1	1.31356	0.870527	1.60334
RUF5-2_RUF5-2	1.31356	0.870527	1.60334
SCR1_SCR1	-0.559928	-0.723138	-0.192987
SRG1_SRG1	1.18329	1.07738	1.14075
TLC1_TLC1	-0.551364	-0.740859	-0.190594
YAL001C_TFC3	0.263326	0.448455	0.311889
YAL001C_TFC3_unspliced	1.35382	0.915731	1.18708
YAL002W_VPS8	0.98372	0.920985	0.913115
YAL003W_EFB1	-0.39724	-0.433829	-0.376149
YAL003W_EFB1_unspliced	-0.314078	-0.578371	-0.360214
YAL004W_YAL004W	-0.174295	-0.225563	-0.456813
YAL005C_SSA1	0.0941637	0.387906	0.348691
YAL007C_ERP2	-0.498082	-0.475218	-0.784959
YAL008W_FUN14	-0.163316	-0.153271	-0.230537
YAL009W_SPO7	-0.042985	-0.0738122	-0.0329399
YAL010C_MDM10	-0.0877826	-0.168623	-0.149953
YAL011W_SWC3	-0.0254253	0.189353	-0.039274
YAL012W_CYS3	-0.450586	-0.560982	-0.511266
YAL013W_DEP1	-0.162925	-0.272655	-0.26614
YAL014C_SYN8	0.878255	0.809003	0.863427
YAL015C_NTG1	0.337844	0.468374	0.396087
YAL016C-A_YAL016C-A	0.0735171	-0.11649	-0.154944
YAL016C-B_YAL016C-B	#NAME?	#NAME?	#NAME?
YAL016W_TPD3	-0.344575	-0.38093	-0.343087
YAL017W_PSK1	-0.121034	-0.0166732	0.0197497
YAL018C_LDS1	-0.194127	0.38841	0.807247
YAL019W-A_YAL019W-A	1.78186	1.3673	1.14188
YAL019W_FUN30	-0.27727	-0.255222	-0.408584
YAL020C_ATS1	0.495179	0.301458	0.406244
YAL021C_CCR4	-0.329077	-0.465351	-0.464805
YAL022C_FUN26	0.194548	0.130944	0.145569
YAL023C_PMT2	-0.442562	-0.475039	-0.457387
YAL024C_LTE1	-0.406209	-0.452527	-0.435739
YAL025C_MAK16	-0.347456	-0.24925	-0.529519
YAL026C-A_YAL026C-A	-0.249074	-0.18653	-0.327472
YAL026C_DRS2	-0.290908	-0.335341	-0.304381
YAL027W_SAW1	0.266641	0.320457	0.270821
YAL028W_FRT2	1.3988	1.43236	1.29873
YAL029C_MYO4	-0.179811	-0.262472	-0.299649
YAL030W_SNC1	-0.25277	-0.245326	-0.259595
YAL030W_SNC1_unspliced	1.132	0.912543	1.31587
YAL031C_GIP4	-0.0692894	-0.155577	-0.150475
YAL031W-A_YAL031W-A	1.28457	0.992398	1.30939
YAL032C_PRP45	-0.0711641	-0.0537319	-0.253536
YAL033W_POP5	-0.289963	-0.413795	-0.283327
YAL034C-B_YAL034C-B	1.85709	0.462615	1.68705
YAL034C_FUN19	0.62743	0.592414	0.488297
YAL034W-A_MTW1	-0.347503	-0.337961	-0.364936
YAL035W_FUN12	-0.279759	-0.261592	-0.354834
YAL036C_RBG1	-0.197049	-0.282653	-0.368387
YAL037C-A_YAL037C-A	0.40373	-1.89345	-0.00564736
YAL037C-B_YAL037C-B	-0.266936	-0.467023	-0.851355
YAL037W_YAL037W	1.91787	1.81903	1.88903
YAL038W_CDC19	-0.387351	-0.471628	-0.456166
YAL039C_CYC3	-0.299417	-0.238939	-0.354476
YAL040C_CLN3	-0.267718	-0.403193	-0.526808
YAL041W_CDC24	-0.235807	-0.302229	-0.289233
YAL042C-A_YAL042C-A	1.7349	1.74004	1.34605
YAL042W_ERV46	-0.407081	-0.504579	-0.433571
YAL043C_PTA1	-0.244061	-0.272324	-0.286587
YAL044C_GCV3	-0.298371	-0.0956167	-0.0188564
YAL044W-A_YAL044W-A	0.193408	0.206533	0.17512
YAL045C_YAL045C	1.07423	-0.637022	0.360959
YAL046C_AIM1	-0.286344	-0.332782	-0.239571
YAL047C_SPC72	0.590426	0.641956	0.518292
YAL047W-A_YAL047W-A	2.55645	2.01777	2.55655
YAL048C_GEM1	1.1538	1.10831	1.05478
YAL049C_AIM2	0.0530496	-0.0150572	0.0336286
YAL051W_OAF1	0.23974	0.266775	0.249476
YAL053W_FLC2	-0.265911	-0.246446	-0.376578
YAL054C_ACS1	0.0850578	0.175783	0.157718
YAL055W_PEX22	-0.127713	0.0459217	-0.041575
YAL056C-A_YAL056C-A	2.20059	1.31883	1.27675
YAL056W_GPB2	-0.102268	-0.115365	-0.151405
YAL058W_CNE1	0.384607	0.337335	0.335637
YAL059C-A_YAL059C-A	0.458232	0.318574	0.388738
YAL059W_ECM1	-0.377147	-0.440445	-0.66506
YAL060W_BDH1	-0.0347665	0.0552922	0.208285
YAL061W_BDH2	-0.441274	-0.261252	-0.186837
YAL062W_GDH3	0.550397	0.679658	0.540376
YAL063C-A_YAL063C-A	1.62855	1.57529	1.7839
YAL063C_FLO9	2.14109	2.05305	2.05416
YAL064C-A_TDA8	2.35388	2.19132	2.39682
YAL064W-B_YAL064W-B	1.15731	0.934182	0.920277
YAL064W_YAL064W	2.7953	2.68325	2.54287
YAL065C_YAL065C	2.04995	2.11636	1.98746
YAL066W_YAL066W	4.2332	3.7825	3.70461
YAL067C_SEO1	1.0687	1.25405	1.23042
YAL067W-A_YAL067W-A	-1.5391	#NAME?	#NAME?
YAL068C_PAU8	1.21773	1.2867	0.981113
YAL068W-A_YAL068W-A	Inf	NA	Inf
YAL069W_YAL069W	1.5864	1.58997	1.03953
YAR002C-A_ERP1	-0.380622	-0.353619	-0.332824
YAR002W_NUP60	-0.236475	-0.245211	-0.261894
YAR003W_SWD1	0.857227	0.837248	0.83013
YAR007C_RFA1	-0.4099	-0.347918	-0.291311
YAR008W_SEN34	0.0721525	0.136407	0.122037
YAR009C_YAR009C	0.661809	0.0968198	0.0859999
YAR010C_YAR010C	-0.445143	-0.824864	-0.801798
YAR014C_BUD14	-0.237674	-0.242046	-0.347921
YAR015W_ADE1	-0.249494	-0.191703	-0.170796
YAR018C_KIN3	0.520711	0.465743	0.441092
YAR019C_CDC15	-0.263303	-0.242612	-0.304208
YAR019W-A_YAR019W-A	0.415037	0.508927	0.423228
YAR020C_PAU7	2.68173	2.63397	2.49703
YAR023C_YAR023C	2.81938	2.66317	2.74862
YAR027W_UIP3	-0.107387	-0.0286167	0.0814276
YAR028W_YAR028W	0.0823789	-0.0356793	0.00854912
YAR029W_YAR029W	1.2555	1.12342	1.19305
YAR030C_YAR030C	1.21777	1.35404	1.2683
YAR031W_PRM9	-0.0844181	-0.0282105	-0.167735
YAR033W_MST28	0.202713	0.205059	0.167117
YAR035C-A_YAR035C-A	Inf	Inf	Inf
YAR035W_YAT1	-0.359526	-0.342941	-0.392308
YAR042W_SWH1	-0.245524	-0.157338	-0.285383
YAR047C_YAR047C	NA	NA	NA
YAR050W_FLO1	0.94491	1.14213	1.085
YAR053W_YAR053W	1.23819	1.30443	1.27613
YAR060C_YAR060C	2.44083	2.46081	2.26305
YAR061W_YAR061W	2.15858	1.46516	2.27886
YAR064W_YAR064W	3.95273	2.92817	3.34584
YAR066W_YAR066W	NA	NA	NA
YAR068W_YAR068W	2.44924	2.71465	3.23002
YAR069C_YAR069C	-0.169358	-0.508966	-0.321516
YAR070C_YAR070C	-1.90995	-1.95811	-1.36286
YAR071W_PHO11	-1.04341	-0.863374	-0.975413
YAR073W_IMD1	0.442852	0.341619	1.11975
YAR075W_YAR075W	0.772447	0.63262	1.46703
YBL001C_ECM15	-0.365033	-0.32751	-0.268288
YBL002W_HTB2	-0.461251	-0.702591	-0.495648
YBL003C_HTA2	-0.773481	-0.869113	-0.680111
YBL004W_UTP20	-0.321888	-0.421587	-0.453883
YBL005W-B_YBL005W-B_unspliced	-0.024103	-0.488172	-0.512955
YBL005W_PDR3	0.710246	0.562381	0.51837
YBL006C_LDB7	-0.104269	-0.272465	-0.142575
YBL006W-A_YBL006W-A	1.11793	0.9979	0.814328
YBL007C_SLA1	-0.456525	-0.417441	-0.420102
YBL008W-A_YBL008W-A	1.35215	1.77318	1.68983
YBL008W_HIR1	-0.0441036	0.0382958	-0.0652584
YBL009W_ALK2	-0.33506	-0.386937	-0.372921
YBL010C_YBL010C	0.715583	0.705418	0.698288
YBL011W_SCT1	-0.0283824	-0.0503818	-0.092545
YBL012C_YBL012C	-1.65715	-1.87777	-0.427
YBL013W_FMT1	0.722767	0.53924	0.62367
YBL014C_RRN6	0.29308	0.310492	0.171096
YBL015W_ACH1	0.0753228	0.101009	0.197212
YBL016W_FUS3	-0.367015	-0.40792	-0.47837
YBL017C_PEP1	0.519801	0.49822	0.418677
YBL018C_POP8	0.124569	0.0812245	0.0598737
YBL018C_POP8_unspliced	-0.765713	-0.693197	-1.21621
YBL019W_APN2	1.31102	1.37835	1.34789
YBL020W_RFT1	0.487189	0.410848	0.365018
YBL021C_HAP3	0.0757023	0.124136	0.0155355
YBL022C_PIM1	-0.321174	-0.123382	-0.148693
YBL023C_MCM2	-0.31941	-0.297016	-0.331559
YBL024W_NCL1	-0.405533	-0.424357	-0.540597
YBL025W_RRN10	1.62672	1.68133	1.64154
YBL026W_LSM2	-0.141635	-0.210257	-0.118137
YBL026W_LSM2_unspliced	0.551995	0.305173	0.474468
YBL027W_RPL19B	-0.491253	-0.502776	-0.472414
YBL027W_RPL19B_unspliced	0.476454	0.231439	0.308136
YBL028C_YBL028C	-0.314128	-0.381214	-0.613873
YBL029C-A_YBL029C-A	-0.0367905	-0.0113608	0.166695
YBL029W_YBL029W	0.028531	0.0504689	0.071222
YBL030C_PET9	-0.215955	-0.125657	-0.176271
YBL031W_SHE1	-0.0495411	-0.0947404	-0.166039
YBL032W_HEK2	-0.547295	-0.579417	-0.632415
YBL033C_RIB1	-0.304856	-0.207723	-0.480715
YBL034C_STU1	-0.436715	-0.443123	-0.387122
YBL035C_POL12	-0.0346997	-0.0218982	-0.0526895
YBL036C_YBL036C	-0.0166253	-0.0373574	-0.0641612
YBL037W_APL3	-0.12722	-0.00293815	-0.00848061
YBL038W_MRPL16	-0.558042	-0.389356	-0.534368
YBL039C-A_YBL039C-A	NA	NA	NA
YBL039C_URA7	-0.347353	-0.445696	-0.655073
YBL039W-B_YBL039W-B	0.595288	0.627393	0.691255
YBL040C_ERD2	-0.304055	-0.307447	-0.177761
YBL040C_ERD2_unspliced	0.701902	0.426539	0.618325
YBL041W_PRE7	-0.170725	-0.165392	-0.0954966
YBL042C_FUI1	-0.189781	-0.142724	-0.233137
YBL043W_ECM13	-0.335073	0.0626594	0.221343
YBL044W_YBL044W	1.26912	0.61734	1.97154
YBL045C_COR1	-0.276287	-0.250809	-0.189663
YBL046W_PSY4	-0.115014	-0.164899	-0.224839
YBL047C_EDE1	-0.413484	-0.322033	-0.335717
YBL048W_RRT1	0.0837889	0.123781	0.0459284
YBL049W_MOH1	-0.271146	-0.212374	-0.221475
YBL050W_SEC17	-0.412646	-0.316494	-0.327783
YBL050W_SEC17_unspliced	0.583822	0.485289	0.807864
YBL051C_PIN4	-0.256331	-0.278211	-0.3182
YBL052C_SAS3	0.198374	0.172972	0.123539
YBL053W_YBL053W	1.54005	0.454326	0.91273
YBL054W_TOD6	-0.180956	-0.125322	-0.47457
YBL055C_YBL055C	-0.139043	-0.129686	-0.217488
YBL056W_PTC3	-0.284308	-0.295901	-0.329454
YBL057C_PTH2	-0.278862	-0.329255	-0.258108
YBL058W_SHP1	-0.222518	-0.173764	-0.136835
YBL059C-A_CMC2	-0.085565	0.104541	0.0593928
YBL059C-A_CMC2_unspliced	0.283882	0.00182889	0.255286
YBL059W_YBL059W	-0.376361	-0.152827	0.0914936
YBL059W_YBL059W_unspliced	0.642168	-0.116999	0.200653
YBL060W_YEL1	1.68736	1.65222	1.50991
YBL061C_SKT5	-0.370527	-0.232982	-0.423824
YBL062W_YBL062W	-0.644659	-1.48042	-1.00087
YBL063W_KIP1	-0.104646	-0.103261	-0.102399
YBL064C_PRX1	0.593591	0.806898	0.867572
YBL065W_YBL065W	0.633986	0.771974	0.749098
YBL066C_SEF1	-0.148026	-0.22166	-0.225719
YBL067C_UBP13	-0.355208	-0.425351	-0.456673
YBL068W-A_YBL068W-A	-0.491243	-0.766185	-5.25057
YBL068W_PRS4	-0.424738	-0.424764	-0.415603
YBL069W_AST1	-0.345627	-0.367374	-0.344154
YBL070C_YBL070C	2.6748	2.20411	2.2407
YBL071C-B_YBL071C-B	1.36436	0.296942	1.52688
YBL071C_YBL071C	0.575484	-0.0436675	0.361936
YBL071W-A_KTI11	1.23963	0.982677	1.10697
YBL072C_RPS8A	-0.488937	-0.561082	-0.418201
YBL072C_RPS8A_5prime_unspliced	0.0179542	-0.105178	-0.054751
YBL073W_YBL073W	-0.361706	2.22958	#NAME?
YBL074C_AAR2	2.3177	2.35335	2.40653
YBL075C_SSA3	2.16653	2.21252	2.18739
YBL076C_ILS1	-0.315907	-0.379005	-0.366264
YBL077W_YBL077W	-1.28296	0.439496	0.0853274
YBL078C_ATG8	0.193314	0.292347	0.169251
YBL079W_NUP170	-0.215706	-0.236229	-0.277702
YBL080C_PET112	-0.196578	-0.0658819	0.0774465
YBL081W_YBL081W	-0.205544	-0.433616	-0.528066
YBL082C_ALG3	0.671369	0.578616	0.610642
YBL083C_YBL083C	0.709564	0.496942	0.555987
YBL084C_CDC27	-0.359432	-0.418492	-0.357596
YBL085W_BOI1	-0.226501	-0.297376	-0.271724
YBL086C_YBL086C	-0.0682383	-0.149539	-0.137864
YBL087C_RPL23A	-0.518686	-0.620642	-0.475864
YBL087C_RPL23A_unspliced	0.413772	0.270301	0.306083
YBL088C_TEL1	1.51284	1.31558	1.33429
YBL089W_AVT5	0.172172	0.0959977	0.0675248
YBL090W_MRP21	-0.584394	-0.382575	-0.39346
YBL091C-A_SCS22	0.0715173	0.22363	0.152151
YBL091C-A_SCS22_unspliced	0.796415	0.694353	0.850694
YBL091C_MAP2	-0.291891	-0.271412	-0.316734
YBL092W_RPL32	-0.434648	-0.537842	-0.462586
YBL092W_RPL32_5prime_unspliced	-0.0263244	-0.210147	-0.149574
YBL093C_ROX3	-0.113091	-0.259152	-0.287286
YBL094C_YBL094C	0.833493	0.734797	1.10594
YBL095W_YBL095W	-0.292691	-0.361822	-0.283666
YBL096C_YBL096C	1.86547	1.6723	1.7165
YBL097W_BRN1	-0.464479	-0.261631	-0.351329
YBL098W_BNA4	-0.301598	-0.210267	-0.0916197
YBL099W_ATP1	-0.381759	-0.355533	-0.346606
YBL100C_YBL100C	1.4324	0.406434	-1.77876
YBL100W-B_YBL100W-B_unspliced	0.851772	0.769707	0.31868
YBL100W-C_YBL100W-C	-0.0306511	-0.656622	-0.382329
YBL101C_ECM21	-0.123742	-0.00734953	-0.0518385
YBL102W_SFT2	-0.286202	-0.345741	-0.2775
YBL103C_RTG3	-0.22195	-0.173289	-0.250079
YBL104C_SEA4	0.109904	0.130815	0.098953
YBL105C_PKC1	-0.332652	-0.322054	-0.321337
YBL106C_SRO77	0.152518	0.192052	0.228635
YBL107C_MIX23	0.413468	0.598315	0.450698
YBL107W-A_YBL107W-A	0.372786	0.457594	0.646677
YBL108C-A_PAU9	1.38656	1.33876	1.20505
YBL108W_YBL108W	NA	NA	NA
YBL109W_YBL109W	2.36493	1.99226	1.95898
YBL111C_YBL111C	NA	NA	NA
YBL111C_YBL111C_unspliced	2.31786	2.80085	3.22346
YBL112C_YBL112C	2.54358	2.56823	2.42126
YBL113C_YBL113C	1.48118	1.55012	1.38709
YBL113W-A_YBL113W-A	2.7334	1.4966	#NAME?
YBR001C_NTH2	-0.2388	-0.161168	-0.0979811
YBR002C_RER2	-0.403044	-0.338844	-0.532169
YBR003W_COQ1	-0.223192	-0.0802825	-0.0500376
YBR004C_GPI18	0.698847	0.59526	0.551104
YBR005W_RCR1	-0.130745	-0.11273	0.0396759
YBR006W_UGA2	0.0447626	0.0859906	0.0152588
YBR007C_DSF2	-0.0514027	-0.0345254	-0.146281
YBR008C_FLR1	1.82526	1.84418	1.86588
YBR009C_HHF1	-0.440948	-0.620442	-0.591306
YBR010W_HHT1	-0.804552	-0.910486	-0.668783
YBR011C_IPP1	-0.414297	-0.460529	-0.45539
YBR012C_YBR012C	NA	NA	NA
YBR012W-B_YBR012W-B_unspliced	-3.14827	-1.14085	-1.35013
YBR013C_YBR013C	NA	NA	NA
YBR014C_GRX7	-0.11319	-0.0831137	-0.064371
YBR015C_MNN2	-0.324389	-0.387118	-0.387409
YBR016W_YBR016W	-0.497146	-0.599414	-0.535951
YBR017C_KAP104	-0.293942	-0.283373	-0.326844
YBR018C_GAL7	1.71903	1.86471	1.86809
YBR019C_GAL10	0.582733	0.573134	0.721575
YBR020W_GAL1	1.74153	1.85107	1.72281
YBR021W_FUR4	-0.0785191	-0.16462	-0.218198
YBR022W_POA1	-0.306665	-0.252354	-0.169711
YBR023C_CHS3	-0.301306	-0.298171	-0.435252
YBR024W_SCO2	-0.288339	-0.126308	0.035168
YBR025C_OLA1	-0.28655	-0.33886	-0.312302
YBR026C_ETR1	-0.421442	-0.266803	-0.286123
YBR027C_YBR027C	0.744758	0.753404	0.253108
YBR028C_YPK3	0.267424	0.305396	0.203071
YBR029C_CDS1	-0.361568	-0.505735	-0.430134
YBR030W_RKM3	1.42871	1.29117	1.2997
YBR031W_RPL4A	-0.396259	-0.483202	-0.386216
YBR032W_YBR032W	#NAME?	-1.18058	-1.94307
YBR033W_EDS1	0.787137	1.12721	1.00194
YBR034C_HMT1	-0.291708	-0.312771	-0.476566
YBR035C_PDX3	-0.440024	-0.334721	-0.285588
YBR036C_CSG2	-0.28303	-0.378106	-0.344157
YBR037C_SCO1	-0.484558	-0.366918	-0.413492
YBR038W_CHS2	-0.323113	-0.292077	-0.207541
YBR039W_ATP3	-0.461975	-0.39845	-0.394226
YBR040W_FIG1	1.17767	1.25186	1.01878
YBR041W_FAT1	-0.345316	-0.389735	-0.357459
YBR042C_CST26	-0.225534	-0.237568	-0.160452
YBR043C_QDR3	2.15202	2.17674	2.1445
YBR044C_TCM62	0.204155	0.321692	0.305674
YBR045C_GIP1	1.92807	2.07108	1.82785
YBR046C_ZTA1	-0.27745	-0.0741534	-0.0810525
YBR047W_FMP23	0.215321	0.390959	0.423801
YBR048W_RPS11B	-0.351309	-0.483684	-0.345125
YBR048W_RPS11B_unspliced	0.859795	0.684396	0.614097
YBR049C_REB1	-0.279171	-0.336636	-0.355117
YBR050C_REG2	1.058	1.18606	1.14982
YBR051W_YBR051W	1.96923	3.06365	2.22749
YBR052C_RFS1	-0.506312	-0.330408	-0.335286
YBR053C_YBR053C	0.03449	0.186256	0.186961
YBR054W_YRO2	-0.0930974	-0.152684	-0.13407
YBR055C_PRP6	1.28662	1.08437	1.01235
YBR056C-B_YBR056C-B	0.508478	0.887293	0.0474407
YBR056W-A_YBR056W-A	-0.0669878	-0.0628303	0.142911
YBR056W_YBR056W	-0.0571649	0.08825	0.132865
YBR057C_MUM2	-0.172219	-0.212085	-0.290866
YBR058C-A_TSC3	-0.46755	-0.505375	-0.483086
YBR058C_UBP14	0.375873	0.294279	0.338832
YBR059C_AKL1	-0.248088	-0.249333	-0.320538
YBR060C_ORC2	-0.161507	-0.211753	-0.174893
YBR061C_TRM7	0.0762371	-0.0315403	-0.0910747
YBR062C_YBR062C	0.130852	0.234057	0.25497
YBR062C_YBR062C_unspliced	1.7019	1.37589	1.25595
YBR063C_YBR063C	1.28008	1.18827	1.20969
YBR064W_YBR064W	3.16244	3.34419	2.89642
YBR065C_ECM2	1.21733	1.20456	1.19561
YBR066C_NRG2	0.0299338	0.0166486	0.101104
YBR067C_TIP1	-0.214592	-0.770681	-0.636669
YBR068C_BAP2	-0.267492	-0.320561	-0.301634
YBR069C_TAT1	-0.273843	-0.432528	-0.453488
YBR070C_ALG14	0.273668	0.164332	0.292665
YBR071W_YBR071W	-0.46513	-0.367338	-0.397952
YBR072C-A_YBR072C-A	-1.60739	#NAME?	#NAME?
YBR072W_HSP26	-0.68493	-0.484432	-0.697263
YBR073W_RDH54	0.0521084	0.0677632	-0.0100335
YBR074W_PFF1	0.588285	0.43127	0.455173
YBR076C-A_YBR076C-A	1.30049	1.08908	1.2635
YBR076W_ECM8	-0.00483501	0.241199	0.00407007
YBR077C_SLM4	0.696467	0.675795	0.773864
YBR078W_ECM33	-0.370513	-0.400543	-0.448964
YBR078W_ECM33_unspliced	-0.356953	-0.604984	-0.49346
YBR079C_RPG1	-0.304738	-0.380357	-0.439171
YBR080C_SEC18	-0.417232	-0.353449	-0.366785
YBR081C_SPT7	-0.390774	-0.271943	-0.293328
YBR082C_UBC4	-0.242696	-0.214014	-0.181621
YBR082C_UBC4_unspliced	-0.514371	-0.378834	-0.347469
YBR083W_TEC1	0.339626	0.231941	0.175832
YBR084C-A_RPL19A	-0.345866	-0.388275	-0.394988
YBR084C-A_RPL19A_unspliced	1.08059	1.00873	0.935306
YBR084W_MIS1	-0.305831	-0.382515	-0.409752
YBR085C-A_YBR085C-A	0.610335	0.787697	0.920054
YBR085W_AAC3	0.8746	0.497111	0.654116
YBR086C_IST2	-0.229118	-0.345362	-0.359332
YBR087W_RFC5	0.0275376	0.00379292	0.136524
YBR088C_POL30	-0.53163	-0.588653	-0.57269
YBR089C-A_NHP6B	-0.300375	-0.317587	-0.282708
YBR089C-A_NHP6B_5prime_unspliced	0.788417	0.607895	0.798152
YBR089W_YBR089W	1.89611	1.34389	1.77917
YBR090C_YBR090C	-1.08185	-1.71132	-1.1021
YBR090C_YBR090C_unspliced	1.14033	1.68432	1.44981
YBR091C_TIM12	-0.420308	-0.452922	-0.497049
YBR092C_PHO3	0.0789911	-0.0579039	-0.0854342
YBR093C_PHO5	-0.758148	-0.681002	-0.892484
YBR094W_PBY1	0.326071	0.437605	0.274365
YBR095C_RXT2	-0.306075	-0.207712	-0.332136
YBR096W_YBR096W	-0.34951	-0.387047	-0.325648
YBR097W_VPS15	-0.254954	-0.230736	-0.255624
YBR098W_MMS4	1.17681	1.19402	1.12663
YBR099C_YBR099C	1.00312	0.967161	1.30197
YBR101C_FES1	-0.170275	-0.148545	0.0687077
YBR102C_EXO84	0.513179	0.578623	0.523405
YBR103C-A_YBR103C-A	0.727746	-0.548922	1.13599
YBR103W_SIF2	0.215574	0.273299	0.159621
YBR104W_YMC2	-0.149103	-0.209487	-0.253569
YBR105C_VID24	-0.553988	-0.651552	-0.820971
YBR106W_PHO88	-0.508797	-0.536469	-0.334621
YBR107C_IML3	0.93677	0.870289	0.834152
YBR108W_AIM3	-0.0666544	0.0424858	-0.0633756
YBR109C_CMD1	-0.110171	-0.0991187	-0.0874846
YBR109W-A_YBR109W-A	0.66721	0.540657	0.6512
YBR110W_ALG1	-0.109923	-0.136353	-0.095293
YBR111C_YSA1	-0.2246	-0.0697961	-0.0530028
YBR111W-A_SUS1	-0.192932	-0.167369	0.0500148
YBR111W-A_SUS1_unspliced	1.14092	1.09839	1.22541
YBR112C_CYC8	-0.421052	-0.37888	-0.500939
YBR113W_YBR113W	0.137338	-0.15222	-0.264974
YBR114W_RAD16	0.499048	0.587019	0.410206
YBR115C_LYS2	-0.408751	-0.283851	-0.254034
YBR116C_YBR116C	0.65572	0.610633	0.738274
YBR117C_TKL2	0.338365	0.525322	0.256968
YBR118W_TEF2	-0.438183	-0.471599	-0.40435
YBR119W_MUD1	0.434728	0.469729	0.379806
YBR119W_MUD1_unspliced	-0.364755	0.376208	0.200746
YBR120C_CBP6	-0.541946	-0.354841	-0.380592
YBR121C-A_YBR121C-A	NA	NA	NA
YBR121C_GRS1	-0.416169	-0.451636	-0.475923
YBR122C_MRPL36	-0.479	-0.366747	-0.374068
YBR123C_TFC1	-0.0833217	-0.0261112	-0.0601815
YBR124W_YBR124W	5.16406	4.80904	5.12189
YBR125C_PTC4	-0.155253	-0.25818	-0.163441
YBR126C_TPS1	-0.241689	-0.153564	-0.165262
YBR126W-A_YBR126W-A	-0.557819	-0.569579	-0.497725
YBR126W-B_YBR126W-B	-0.155077	-0.222313	-0.173792
YBR127C_VMA2	-0.424701	-0.415047	-0.426185
YBR128C_ATG14	-0.287411	-0.0892405	-0.0674269
YBR129C_OPY1	-0.424014	-0.401398	-0.326279
YBR130C_SHE3	-0.444053	-0.459203	-0.498398
YBR131C-A_YBR131C-A	NA	NA	NA
YBR131W_CCZ1	-0.0601144	-0.00911498	-0.0280649
YBR132C_AGP2	-0.437476	-0.276573	-0.26931
YBR133C_HSL7	0.090327	-0.00735466	0.31104
YBR134W_YBR134W	1.38623	2.34782	1.93903
YBR135W_CKS1	-0.426637	-0.461824	-0.494873
YBR136W_MEC1	0.365494	0.207604	0.17858
YBR137W_YBR137W	-0.328941	-0.244203	-0.197292
YBR138C_YBR138C	-0.279683	-0.0658026	-0.0871741
YBR139W_YBR139W	0.0108594	0.114305	0.126291
YBR140C_IRA1	-0.160283	-0.180297	-0.171722
YBR141C_BMT2	0.0188451	-0.0492103	-0.204134
YBR141W-A_YBR141W-A	4.12474	3.22601	2.55526
YBR142W_MAK5	-0.34841	-0.358643	-0.574438
YBR143C_SUP45	-0.270806	-0.308331	-0.313096
YBR144C_YBR144C	-0.384047	-1.28107	-0.400327
YBR145W_ADH5	-0.0499696	0.0675203	0.154347
YBR146W_MRPS9	-0.518688	-0.381684	-0.42211
YBR147W_RTC2	-0.506967	-0.28573	-0.217373
YBR148W_YSW1	1.49151	1.71219	1.40699
YBR149W_ARA1	-0.332571	-0.161377	-0.14052
YBR150C_TBS1	-0.312973	-0.280511	-0.365554
YBR151W_APD1	-0.102737	-0.0818719	-0.149383
YBR152W_SPP381	0.846635	0.954126	0.707666
YBR153W_RIB7	0.127857	0.172955	0.0941171
YBR154C_RPB5	-0.47436	-0.507436	-0.475571
YBR155W_CNS1	-0.139093	-0.143538	-0.301711
YBR156C_SLI15	0.658027	0.524442	0.331068
YBR157C_ICS2	-0.254673	-0.111856	-0.217922
YBR158W_AMN1	-0.236544	-0.353077	-0.417148
YBR159W_IFA38	-0.289956	-0.296275	-0.277984
YBR160W_CDC28	-0.313982	-0.335965	-0.188749
YBR161W_CSH1	-0.017527	-0.208161	-0.0963244
YBR162C_TOS1	-0.479137	-0.576168	-0.587131
YBR162W-A_YSY6	0.0584053	-0.124941	-0.100311
YBR163W_EXO5	1.1629	1.08793	1.0437
YBR164C_ARL1	-0.0669985	-0.114733	-0.135795
YBR165W_UBS1	-0.33765	-0.503564	-0.54908
YBR166C_TYR1	-0.276837	-0.161027	-0.229721
YBR167C_POP7	0.478164	0.545541	0.42308
YBR168W_PEX32	0.859962	0.792811	0.834986
YBR169C_SSE2	-0.108234	0.158228	0.123396
YBR170C_NPL4	-0.0471013	0.0574807	0.0355483
YBR171W_SEC66	-0.327245	-0.401996	-0.440704
YBR172C_SMY2	-0.44038	-0.352022	-0.445481
YBR173C_UMP1	-0.170348	-0.251249	-0.271766
YBR174C_YBR174C	3.12243	2.53076	2.75119
YBR175W_SWD3	0.48107	0.391792	0.483686
YBR176W_ECM31	-0.412094	-0.292849	-0.314284
YBR177C_EHT1	-0.096588	-0.17194	0.0296859
YBR178W_YBR178W	-0.128042	0.346215	0.528499
YBR179C_FZO1	-0.0343429	0.0493618	-0.00503415
YBR180W_DTR1	1.93964	1.95728	1.53711
YBR181C_RPS6B	-0.431444	-0.426358	-0.439913
YBR181C_RPS6B_unspliced	0.829112	0.562686	0.574994
YBR182C-A_YBR182C-A	1.17875	1.03016	0.895864
YBR182C_SMP1	0.56806	0.562137	0.644177
YBR183W_YPC1	-0.467035	-0.514641	-0.269459
YBR184W_YBR184W	2.17561	2.15133	2.12881
YBR185C_MBA1	-0.266273	-0.153463	-0.180206
YBR186W_PCH2	0.847995	0.908268	0.958351
YBR186W_PCH2_unspliced	0.664853	1.74737	0.863536
YBR187W_GDT1	-0.180971	-0.264629	-0.270443
YBR188C_NTC20	0.203273	0.221348	0.290682
YBR189W_RPS9B	-0.579892	-0.578483	-0.48272
YBR189W_RPS9B_unspliced	0.81589	0.752367	0.805848
YBR190W_YBR190W	1.06047	0.97326	0.594617
YBR191W-A_YBR191W-A	-1.00417	-0.8964	-0.352349
YBR191W_RPL21A	-0.606706	-0.6122	-0.449507
YBR191W_RPL21A_unspliced	0.876374	0.651258	0.874566
YBR192W_RIM2	-0.269371	-0.149098	-0.236235
YBR193C_MED8	0.529644	0.543755	0.466173
YBR194W_AIM4	-0.330614	-0.154922	-0.247435
YBR195C_MSI1	0.91149	0.805174	0.815454
YBR196C-A_YBR196C-A	1.30059	1.14322	1.12393
YBR196C-B_YBR196C-B	0.894751	0.483123	0.760768
YBR196C_PGI1	-0.400821	-0.494806	-0.450167
YBR197C_YBR197C	1.49127	1.43486	1.38662
YBR198C_TAF5	-0.356903	-0.242859	-0.314492
YBR199W_KTR4	-0.210021	-0.251913	-0.203605
YBR200W-A_YBR200W-A	NA	NA	Inf
YBR200W_BEM1	-0.0265965	0.0512623	-0.0222745
YBR201C-A_YBR201C-A	0.119995	0.0726567	-0.333472
YBR201W_DER1	-0.248898	-0.222698	-0.219299
YBR202W_MCM7	-0.123474	-0.168562	-0.161885
YBR203W_COS111	0.0921307	0.0979831	-0.0134617
YBR204C_LDH1	-0.0496825	0.0265126	0.0342273
YBR205W_KTR3	-0.356823	-0.378635	-0.361099
YBR206W_YBR206W	-0.327889	-0.464615	-0.337856
YBR207W_FTH1	-0.420586	-0.423066	-0.381741
YBR208C_DUR1,2	0.65519	0.585649	0.643177
YBR209W_YBR209W	1.17508	1.18818	0.604327
YBR210W_ERV15	-0.0564045	-0.134509	-0.0138822
YBR211C_AME1	-0.516818	-0.620828	-0.616035
YBR212W_NGR1	-0.45039	-0.52517	-0.513831
YBR213W_MET8	-0.293336	0.0332206	-0.167849
YBR214W_SDS24	-0.0247947	-0.0267851	0.0415388
YBR215W_HPC2	0.0160008	0.143292	-0.0227128
YBR215W_HPC2_unspliced	0.971862	0.89012	0.739135
YBR216C_YBP1	1.13427	1.29685	1.25527
YBR217W_ATG12	1.71962	1.70778	1.59212
YBR218C_PYC2	-0.254439	-0.163703	-0.130764
YBR219C_YBR219C	NA	NA	NA
YBR219C_YBR219C_unspliced	0.0495468	-0.0911514	0.0882794
YBR220C_YBR220C	-0.0149975	-0.110688	-0.0517595
YBR221C_PDB1	-0.0809932	-0.1343	-0.0783503
YBR221W-A_YBR221W-A	-1.77068	1.1227	0.737078
YBR222C_PCS60	-0.0676061	-0.0888302	-0.0912922
YBR223C_TDP1	1.41163	1.36793	1.34034
YBR223W-A_YBR223W-A	NA	NA	NA
YBR224W_YBR224W	-1.20002	-0.793717	-0.750455
YBR225W_YBR225W	-0.293678	-0.198633	-0.281288
YBR226C_YBR226C	0.159375	-0.0906958	-0.0097459
YBR227C_MCX1	0.0144793	0.0833382	-0.00582953
YBR228W_SLX1	1.63322	1.64813	1.53635
YBR229C_ROT2	-0.157206	-0.167232	-0.195429
YBR230C_OM14	-0.309002	-0.189664	-0.0420661
YBR230C_OM14_unspliced	0.375098	-0.0768322	-0.063558
YBR230W-A_YBR230W-A	-0.786859	-0.493475	-0.725173
YBR231C_SWC5	-0.356969	-0.222191	-0.215475
YBR232C_YBR232C	2.5251	2.20978	1.42969
YBR233W-A_DAD3	-0.351734	-0.468009	-0.471189
YBR233W_PBP2	-0.241855	-0.211779	-0.205518
YBR234C_ARC40	-0.365974	-0.375981	-0.388438
YBR235W_VHC1	0.0838607	0.0307019	0.0283578
YBR236C_ABD1	-0.155984	-0.172841	-0.191362
YBR237W_PRP5	1.14511	0.944595	0.878885
YBR238C_YBR238C	-0.121516	-0.251431	-0.374119
YBR239C_ERT1	-0.261285	-0.174027	-0.216763
YBR240C_THI2	-0.125087	-0.219629	0.00263633
YBR241C_YBR241C	0.206529	0.179934	0.169955
YBR242W_YBR242W	0.266029	0.201051	0.131673
YBR243C_ALG7	-0.229912	-0.272793	-0.27922
YBR244W_GPX2	0.599509	0.723306	0.732592
YBR245C_ISW1	-0.180606	-0.126754	-0.197713
YBR246W_RRT2	0.373272	0.350718	0.388635
YBR247C_ENP1	-0.0902458	-0.0902788	-0.328491
YBR248C_HIS7	-0.457539	-0.304692	-0.374271
YBR249C_ARO4	-0.395432	-0.368966	-0.321899
YBR250W_SPO23	2.16395	2.14616	2.11201
YBR251W_MRPS5	-0.442439	-0.266851	-0.381431
YBR252W_DUT1	-0.428528	-0.651789	-0.469078
YBR253W_SRB6	0.571466	0.551451	0.564426
YBR254C_TRS20	-0.313303	-0.327101	-0.274053
YBR255C-A_YBR255C-A	-0.125159	-0.0334452	-0.0519517
YBR255C-A_YBR255C-A_unspliced	-0.105456	-0.381143	-0.388543
YBR255W_MTC4	0.0116098	0.166418	0.039248
YBR256C_RIB5	-0.240664	0.0179876	0.0611552
YBR257W_POP4	0.378855	0.391606	0.256489
YBR258C_SHG1	0.497326	0.546365	0.596049
YBR259W_YBR259W	0.810226	0.804501	0.806406
YBR260C_RGD1	-0.315577	-0.324039	-0.308757
YBR261C_TAE1	-0.307049	-0.3815	-0.327723
YBR262C_MIC12	-0.4486	-0.329873	-0.468013
YBR263W_SHM1	-0.393071	-0.432056	-0.308891
YBR264C_YPT10	0.666673	0.624126	0.559998
YBR265W_TSC10	-0.456383	-0.56754	-0.520175
YBR266C_SLM6	-0.0482328	-1.50696	1.25385
YBR267W_REI1	-0.215175	-0.223835	-0.469365
YBR268W_MRPL37	-0.346272	-0.242966	-0.35438
YBR269C_SDH8	-0.359733	-0.466408	-0.365384
YBR270C_BIT2	2.30834	2.31525	2.25649
YBR271W_EFM2	-0.0145307	-0.0805713	-0.0235106
YBR272C_HSM3	0.186841	0.312932	0.251781
YBR273C_UBX7	-0.241361	-0.227989	-0.182648
YBR274W_CHK1	0.312747	0.2389	0.351191
YBR275C_RIF1	-0.332056	-0.310449	-0.299315
YBR276C_PPS1	0.0653618	-0.0638218	-0.0181715
YBR277C_YBR277C	1.04841	0.789735	1.20144
YBR278W_DPB3	0.951115	0.970035	0.969262
YBR279W_PAF1	-0.345542	-0.269321	-0.369019
YBR280C_SAF1	0.270418	0.322649	0.407876
YBR281C_DUG2	-0.125638	-0.161837	-0.161135
YBR282W_MRPL27	-0.366	-0.15637	-0.218276
YBR283C_SSH1	-0.300823	-0.440484	-0.378776
YBR284W_YBR284W	2.52331	2.58546	2.51633
YBR285W_YBR285W	-0.426763	-0.104187	-0.409811
YBR286W_APE3	-0.448644	-0.493376	-0.424612
YBR287W_YBR287W	-0.0718797	-0.135505	-0.108726
YBR288C_APM3	-0.406799	-0.473506	-0.376799
YBR289W_SNF5	-0.257793	-0.261322	-0.373561
YBR290W_BSD2	-0.422975	-0.408056	-0.468967
YBR291C_CTP1	0.830292	0.780133	0.849617
YBR292C_YBR292C	0.505112	0.659795	0.662239
YBR293W_VBA2	2.00105	1.87836	1.88218
YBR294W_SUL1	-1.24209	-0.751767	-0.839597
YBR295W_PCA1	1.07116	1.23782	1.1006
YBR296C-A_YBR296C-A	-0.553393	1.41533	1.42354
YBR296C_PHO89	-1.10598	-0.768644	-1.31458
YBR297W_MAL33	0.351028	0.496134	0.479352
YBR298C-A_YBR298C-A	2.01978	1.10084	1.29738
YBR298C_MAL31	3.31113	3.23347	3.25961
YBR299W_MAL32	1.79776	2.05875	1.83574
YBR300C_YBR300C	1.04927	0.787151	0.724865
YBR301W_PAU24	1.04274	0.618034	1.27801
YBR302C_COS2	0.320987	0.392949	0.395554
YCL001W-A_YCL001W-A	1.52432	1.9156	1.86094
YCL001W-B_YCL001W-B	0.684589	0.721834	0.625774
YCL001W_RER1	-0.486547	-0.581555	-0.279817
YCL002C_YCL002C	-0.285361	-0.34809	-0.294134
YCL002C_YCL002C_unspliced	1.34488	0.968465	0.977079
YCL004W_PGS1	1.7799	1.66172	1.59117
YCL005W-A_VMA9	-0.490593	-0.576215	-0.533405
YCL005W-A_VMA9_unspliced	-0.569685	-1.00859	-0.655091
YCL005W_LDB16	-0.0560629	-0.177245	-0.189613
YCL007C_YCL007C	1.8702	1.66692	1.81026
YCL008C_STP22	0.203364	0.0739206	0.0513851
YCL009C_ILV6	-0.345518	-0.361011	-0.33423
YCL010C_SGF29	2.13617	2.06122	2.02413
YCL011C_GBP2	0.855681	0.78224	0.709083
YCL012C_YCL012C	-0.265194	-0.144387	-0.3586
YCL012C_YCL012C_unspliced	0.623929	0.140321	-0.0831795
YCL014W_BUD3	-0.0786235	-0.000277262	-0.0552039
YCL016C_DCC1	1.11326	1.1318	1.00892
YCL017C_NFS1	-0.416773	-0.364797	-0.402584
YCL018W_LEU2	1.67219	1.75527	1.77969
YCL019W_YCL019W_unspliced	0.618788	0.202835	0.0382601
YCL021W-A_YCL021W-A	-0.186771	-0.343755	-0.358421
YCL022C_YCL022C	-0.000924167	1.70112	-0.339736
YCL023C_YCL023C	2.70418	2.82563	2.51013
YCL024W_KCC4	-0.216515	-0.209838	-0.200494
YCL025C_AGP1	-0.298245	-0.380287	-0.349005
YCL026C-A_FRM2	-0.28588	-0.192465	-0.0297748
YCL026C-B_HBN1	-0.6369	-0.699893	-0.332865
YCL027W_FUS1	-0.183859	-0.0391944	-0.225157
YCL028W_RNQ1	-0.369512	-0.410043	-0.379515
YCL029C_BIK1	-0.0089927	0.0548693	-0.0594557
YCL030C_HIS4	-0.452547	-0.240885	-0.279036
YCL031C_RRP7	-0.425313	-0.491166	-0.555185
YCL032W_STE50	-0.00702161	0.0467861	-0.0693764
YCL033C_MXR2	-0.357258	-0.343224	-0.169051
YCL034W_LSB5	-0.269341	-0.248282	-0.205881
YCL035C_GRX1	-0.279024	-0.153214	-0.148078
YCL036W_GFD2	0.111315	0.20505	-0.0923417
YCL037C_SRO9	-0.103731	-0.173027	-0.291271
YCL038C_ATG22	-0.0869418	0.00280186	-0.205326
YCL039W_GID7	0.956685	0.927491	0.918922
YCL040W_GLK1	-0.335947	-0.218048	-0.168442
YCL041C_YCL041C	0.0508665	-0.0205194	0.288043
YCL042W_YCL042W	0.591317	0.518495	0.508696
YCL043C_PDI1	-0.243663	-0.180225	-0.260294
YCL044C_MGR1	0.129183	0.186611	0.0776671
YCL045C_EMC1	-0.25197	-0.30695	-0.303606
YCL046W_YCL046W	-0.194504	0.189921	0.641205
YCL047C_POF1	-0.230603	-0.0654669	-0.1064
YCL048W-A_YCL048W-A	-1.18243	-0.862933	-1.12084
YCL048W_SPS22	1.19413	1.28349	1.28194
YCL049C_YCL049C	-0.164594	-0.00305617	-0.0893102
YCL050C_APA1	-0.113895	-0.183977	-0.149664
YCL051W_LRE1	-0.276736	-0.347912	-0.358644
YCL052C_PBN1	-0.122054	-0.0708448	-0.00506987
YCL054W-A_RDT1	0.875302	0.791112	1.04074
YCL054W_SPB1	-0.2207	-0.153554	-0.399492
YCL055W_KAR4	-0.577752	-0.498997	-0.594781
YCL056C_PEX34	1.7566	1.62109	1.51448
YCL057C-A_MIC10	-0.468953	-0.534942	-0.55253
YCL057W_PRD1	-0.260947	-0.165057	-0.201026
YCL058C_FYV5	-0.182932	-0.190519	-0.248313
YCL058W-A_ADF1	-0.346475	-0.241946	-0.592488
YCL059C_KRR1	-0.210861	-0.351691	-0.475733
YCL061C_MRC1	0.418516	0.429561	0.258167
YCL063W_VAC17	-0.328476	-0.322192	-0.380896
YCL064C_CHA1	0.247138	0.00834678	-0.263361
YCL065W_YCL065W	NA	Inf	NA
YCL066W_HMLALPHA1	1.10832	0.760571	0.606515
YCL067C_HMLALPHA2	1.40407	1.40116	1.52236
YCL068C_YCL068C	NA	NA	NA
YCL069W_VBA3	-1.42088	-3.49714	-2.42308
YCL073C_GEX1	0.6039	1.45213	-0.352627
YCL074W_YCL074W	Inf	Inf	Inf
YCL075W_YCL075W	1.78572	3.60006	2.6651
YCL076W_YCL076W	-0.512025	1.33814	-0.102208
YCR001W_YCR001W	0.353652	1.01874	1.55467
YCR002C_CDC10	-0.490924	-0.444879	-0.434699
YCR003W_MRPL32	-0.560094	-0.325806	-0.497648
YCR004C_YCP4	-0.379219	-0.295222	-0.228194
YCR005C_CIT2	-0.192757	-0.302018	-0.174201
YCR006C_YCR006C	1.42304	1.34586	1.37039
YCR007C_YCR007C	1.02056	1.26321	1.32781
YCR008W_SAT4	-0.32331	-0.443286	-0.470337
YCR009C_RVS161	-0.220611	-0.14477	-0.180529
YCR010C_ADY2	0.361967	0.795799	0.452717
YCR011C_ADP1	-0.0647005	-0.0313337	-0.0786022
YCR012W_PGK1	-0.450139	-0.43378	-0.318639
YCR013C_YCR013C	-0.60122	-0.698858	-0.776998
YCR014C_POL4	1.32788	1.3144	1.17646
YCR015C_YCR015C	0.772469	0.798096	0.759701
YCR016W_YCR016W	-0.269337	-0.243515	-0.503062
YCR017C_CWH43	0.159543	0.0866339	0.0844387
YCR018C-A_YCR018C-A	0.559308	0.704864	0.789239
YCR018C_SRD1	0.506874	0.592062	0.484588
YCR019W_MAK32	0.311733	0.308232	0.315773
YCR020C-A_MAK31	1.05038	0.889606	0.998405
YCR020C_PET18	3.6718	3.52356	3.61345
YCR020W-B_HTL1	2.15746	2.12113	2.2517
YCR021C_HSP30	-0.519476	-0.625925	-0.515942
YCR022C_YCR022C	1.61348	0.947704	1.14097
YCR023C_YCR023C	0.404945	0.406187	0.376059
YCR024C-A_PMP1	-0.16558	-0.397463	-0.344304
YCR024C-B_YCR024C-B	-0.0955822	-0.272113	-0.363017
YCR024C_SLM5	-0.136928	0.052944	-0.0543464
YCR025C_YCR025C	1.09669	0.941507	0.801002
YCR026C_NPP1	-0.0414573	-0.0264616	-0.117557
YCR027C_RHB1	0.150241	0.0373022	0.0245653
YCR028C-A_RIM1	-0.515037	-0.583965	-0.419995
YCR028C-A_RIM1_unspliced	0.366004	-0.371149	0.442074
YCR028C_FEN2	1.222	1.1566	1.10978
YCR030C_SYP1	-0.33271	-0.261291	-0.247896
YCR031C_RPS14A	-0.351847	-0.482879	-0.420079
YCR031C_RPS14A_unspliced	0.572824	0.281199	0.596473
YCR032W_BPH1	0.550852	0.59459	0.486448
YCR033W_SNT1	-0.174357	-0.219949	-0.318421
YCR034W_ELO2	-0.308493	-0.537162	-0.446688
YCR035C_RRP43	-0.207591	-0.136496	-0.315207
YCR036W_RBK1	0.673967	0.781259	0.695597
YCR037C_PHO87	1.73627	1.67399	1.67392
YCR038C_BUD5	0.736286	0.70167	0.650739
YCR038W-A_YCR038W-A	0.102523	0.51221	-0.110611
YCR039C_MATALPHA2	1.40407	1.40116	1.52236
YCR040W_MATALPHA1	1.10832	0.760571	0.606515
YCR041W_YCR041W	0.127563	0.197135	0.314209
YCR042C_TAF2	-0.142828	-0.0173623	-0.109599
YCR043C_YCR043C	-0.127632	-0.274813	-0.215186
YCR044C_PER1	-0.187424	-0.229966	-0.0948628
YCR045C_RRT12	0.836819	0.381309	0.37479
YCR045W-A_YCR045W-A	2.80916	2.57483	2.60304
YCR046C_IMG1	-0.407163	-0.390869	-0.267519
YCR047C_BUD23	-0.260704	-0.378916	-0.579129
YCR047W-A_YCR047W-A	0.94659	0.10097	-0.00539163
YCR048W_ARE1	-0.229079	-0.290495	-0.216028
YCR049C_YCR049C	1.9551	-1.26013	-0.601468
YCR050C_YCR050C	0.904461	-0.346461	0.156041
YCR051W_YCR051W	-0.220966	-0.390173	-0.318444
YCR052W_RSC6	-0.275775	-0.290396	-0.286013
YCR053W_THR4	-0.406465	-0.460284	-0.395812
YCR054C_CTR86	-0.202042	-0.189462	-0.31387
YCR057C_PWP2	-0.263231	-0.328764	-0.510352
YCR059C_YIH1	0.260633	0.15904	0.258216
YCR060W_TAH1	-0.11928	-0.173996	-0.0336725
YCR061W_YCR061W	-0.199912	-0.188327	-0.0706692
YCR063W_BUD31	1.26535	1.1879	1.19513
YCR064C_YCR064C	-0.192486	-0.462774	-0.556014
YCR065W_HCM1	0.488314	0.483228	0.366342
YCR066W_RAD18	0.33535	0.375552	0.355351
YCR067C_SED4	-0.214021	-0.25008	-0.0296303
YCR068W_ATG15	1.12287	1.09881	1.07121
YCR069W_CPR4	0.121649	0.153049	0.118735
YCR071C_IMG2	-0.456914	-0.261542	-0.309146
YCR072C_RSA4	-0.237733	-0.256488	-0.453538
YCR073C_SSK22	0.518241	0.691929	0.657049
YCR073W-A_SOL2	-0.211447	-0.183119	-0.419951
YCR075C_ERS1	-0.0283686	-0.0830153	0.133028
YCR075W-A_YCR075W-A	-0.220978	-0.258763	-0.318168
YCR076C_FUB1	0.60165	0.539347	0.623057
YCR077C_PAT1	-0.389281	-0.281837	-0.339737
YCR079W_PTC6	-0.122562	-0.251411	-0.301957
YCR081C-A_YCR081C-A	-0.0621968	-0.393617	0.0754266
YCR081W_SRB8	0.298187	0.275655	0.243202
YCR082W_AHC2	0.0358039	0.0707877	0.121357
YCR083W_TRX3	-0.371035	-0.221526	-0.164246
YCR084C_TUP1	-0.394256	-0.421436	-0.484668
YCR085W_YCR085W	1.11263	0.500757	0.552014
YCR086W_CSM1	-0.108465	-0.0951537	0.182095
YCR087C-A_YCR087C-A	0.114046	-0.00402566	-0.194819
YCR087W_YCR087W	-0.18897	-0.306061	-0.663514
YCR088W_ABP1	0.0472378	0.0788255	-0.00792962
YCR089W_FIG2	2.34481	1.69836	1.58378
YCR090C_YCR090C	-0.324272	-0.390806	-0.268304
YCR091W_KIN82	1.51229	1.29698	1.2901
YCR092C_MSH3	0.531104	0.489065	0.477663
YCR093W_CDC39	-0.265733	-0.355411	-0.312115
YCR094W_CDC50	-0.210257	-0.168557	-0.101719
YCR095C_OCA4	-0.361065	-0.305207	-0.285926
YCR095W-A_YCR095W-A	3.17963	3.11359	3.18078
YCR096C_HMRA2	1.69826	1.60651	1.58888
YCR097W-A_YCR097W-A	NA	NA	NA
YCR097W_HMRA1	-0.371139	-0.379702	-0.317854
YCR097W_HMRA1_unspliced	-0.357443	-0.377129	-0.700226
YCR098C_GIT1	0.101268	0.410698	-0.118339
YCR099C_YCR099C	1.33996	1.35405	0.951779
YCR100C_YCR100C	1.33609	1.33972	0.998338
YCR101C_YCR101C	1.13596	1.16496	0.805546
YCR102C_YCR102C	1.93342	1.74693	2.02123
YCR102W-A_YCR102W-A	2.76809	2.63098	3.00837
YCR104W_PAU3	2.73642	2.901	2.85186
YCR105W_ADH7	-0.101486	0.0607553	-0.0535186
YCR106W_RDS1	1.8113	1.76338	1.73972
YCR107W_AAD3	1.71007	1.62677	1.54358
YCR108C_YCR108C	1.27922	1.2601	1.58164
YDL001W_RMD1	0.0877629	0.0353299	-0.0699494
YDL002C_NHP10	0.125536	0.181524	0.141098
YDL003W_MCD1	-0.395731	-0.384381	-0.470051
YDL004W_ATP16	-0.346857	-0.31216	-0.277415
YDL005C_MED2	-0.184426	-0.189705	-0.282239
YDL006W_PTC1	-0.299769	-0.379938	-0.335382
YDL007C-A_YDL007C-A	-0.817269	0.50124	0.0343724
YDL007W_RPT2	-0.309524	-0.16463	-0.249075
YDL008W_APC11	-0.462732	-0.346593	-0.376766
YDL009C_YDL009C	1.11184	0.761497	1.17956
YDL010W_GRX6	0.532845	0.494907	0.460773
YDL011C_YDL011C	1.38158	-0.321267	0.490026
YDL012C_YDL012C	-0.242419	-0.357159	-0.343834
YDL012C_YDL012C_unspliced	1.54975	1.45078	1.34323
YDL013W_SLX5	-0.148002	-0.0220588	-0.22765
YDL014W_NOP1	-0.424504	-0.540763	-0.634503
YDL015C_TSC13	-0.112294	-0.212526	-0.100802
YDL016C_YDL016C	-0.0112893	-0.233501	0.0647791
YDL017W_CDC7	-0.229646	-0.139546	-0.180051
YDL018C_ERP3	-0.0923992	-0.166321	-0.071184
YDL019C_OSH2	-0.137821	-0.111025	-0.0507644
YDL020C_RPN4	-0.178837	-0.196811	-0.119513
YDL021W_GPM2	-0.347174	0.263789	0.0324319
YDL022C-A_YDL022C-A	2.20681	2.41409	2.27731
YDL022W_GPD1	-0.209211	-0.247299	-0.240421
YDL023C_YDL023C	1.55625	0.922854	0.565811
YDL024C_DIA3	1.20513	1.42039	1.17467
YDL025C_RTK1	0.0345183	0.161088	0.189232
YDL025W-A_YDL025W-A	0.173267	-0.827221	0.0463616
YDL026W_YDL026W	1.57409	1.61246	1.52554
YDL027C_YDL027C	0.0268272	0.0685408	0.00743152
YDL028C_MPS1	-0.225675	-0.200338	-0.307036
YDL029W_ARP2	-0.236641	-0.226673	-0.186401
YDL029W_ARP2_unspliced	-0.0736513	-0.600159	-0.709436
YDL030W_PRP9	-0.020381	0.043577	-0.028279
YDL031W_DBP10	-0.255637	-0.260769	-0.524386
YDL032W_YDL032W	1.58137	1.49312	1.45929
YDL033C_SLM3	0.842261	0.782385	0.804824
YDL034W_YDL034W	1.36288	1.21521	-0.761497
YDL035C_GPR1	-0.418045	-0.328475	-0.420393
YDL036C_PUS9	0.139773	0.151349	0.13395
YDL037C_BSC1	-0.105343	-0.474294	-0.56562
YDL039C_PRM7	-0.0914394	-0.481067	-0.556698
YDL040C_NAT1	-0.345307	-0.295965	-0.31111
YDL041W_YDL041W	0.791532	0.85365	0.540535
YDL042C_SIR2	-0.388475	-0.572952	-0.44719
YDL043C_PRP11	-0.0715031	-0.0277742	-0.0697687
YDL044C_MTF2	0.434593	0.599848	0.481489
YDL045C_FAD1	-0.301743	-0.254129	-0.223326
YDL045W-A_MRP10	-0.481535	-0.375624	-0.424563
YDL046W_NPC2	-0.435974	-0.521576	-0.451846
YDL047W_SIT4	0.0928735	-0.00203462	0.0152906
YDL048C_STP4	-0.103012	-0.322411	-0.33867
YDL049C_KNH1	-0.06104	0.0261775	-0.108015
YDL050C_YDL050C	-1.54064	-0.949729	0.27783
YDL051W_LHP1	-0.122542	-0.21865	-0.301044
YDL052C_SLC1	-0.328144	-0.367972	-0.348505
YDL053C_PBP4	-0.0898327	-0.182316	-0.0800485
YDL054C_MCH1	-0.0348319	-0.045073	0.0461139
YDL055C_PSA1	-0.419916	-0.460929	-0.501699
YDL056W_MBP1	-0.161811	-0.121796	-0.18682
YDL057W_YDL057W	0.15974	0.275562	0.286834
YDL058W_USO1	-0.366351	-0.353597	-0.396638
YDL059C_RAD59	-0.167743	-0.178633	-0.131917
YDL060W_TSR1	-0.109619	-0.123242	-0.325166
YDL061C_RPS29B	-0.406961	-0.628797	-0.465723
YDL061C_RPS29B_5prime_unspliced	1.35836	1.20195	1.22836
YDL062W_YDL062W	2.23422	2.18203	2.20625
YDL063C_SYO1	-0.293914	-0.289952	-0.459645
YDL064W_UBC9	-0.314667	-0.301612	-0.249348
YDL064W_UBC9_unspliced	0.290849	-0.268712	0.144196
YDL065C_PEX19	-0.182262	-0.0849563	-0.299027
YDL066W_IDP1	-0.352537	-0.2062	-0.154646
YDL067C_COX9	-0.235215	-0.279919	-0.152949
YDL068W_YDL068W	-0.168015	-1.09974	0.322258
YDL069C_CBS1	0.376096	0.355797	0.251444
YDL070W_BDF2	-0.398286	-0.362339	-0.418271
YDL071C_YDL071C	0.904987	0.275483	0.806876
YDL072C_YET3	-0.214696	-0.16963	-0.12089
YDL073W_YDL073W	0.316451	0.301821	0.240168
YDL074C_BRE1	-0.234907	-0.214426	-0.256579
YDL075W_RPL31A	-0.437462	-0.46558	-0.459435
YDL075W_RPL31A_unspliced	0.0115271	-0.00190161	-0.0894663
YDL076C_RXT3	0.21862	0.0707602	0.07249
YDL077C_VAM6	0.500653	0.488291	0.501488
YDL078C_MDH3	-0.377995	-0.403243	-0.407981
YDL079C_MRK1	0.0600802	0.19443	-0.0152637
YDL079C_MRK1_unspliced	-0.225288	-0.268645	-0.30147
YDL080C_THI3	0.603548	0.552122	0.532807
YDL081C_RPP1A	-0.565641	-0.68943	-0.524105
YDL082W_RPL13A	-0.548306	-0.590304	-0.48741
YDL082W_RPL13A_unspliced	0.354089	-0.0766095	0.0618386
YDL083C_RPS16B	-0.472112	-0.591128	-0.408749
YDL083C_RPS16B_unspliced	0.464612	0.190958	0.333108
YDL084W_SUB2	-0.460262	-0.481714	-0.479634
YDL085C-A_YDL085C-A	-0.043935	-0.132481	-0.31984
YDL085W_NDE2	0.022002	0.607309	0.180521
YDL086C-A_YDL086C-A	0.254051	-0.0594802	-0.223523
YDL086W_YDL086W	-0.13709	-0.17282	-0.0748823
YDL087C_LUC7	0.962729	0.882207	0.858802
YDL088C_ASM4	0.363071	0.293661	0.283959
YDL089W_NUR1	-0.160224	-0.112326	-0.152189
YDL090C_RAM1	0.0986968	0.069439	0.0602528
YDL091C_UBX3	-0.0335626	-0.0564712	-0.0574308
YDL092W_SRP14	-0.522151	-0.509891	-0.523107
YDL093W_PMT5	0.420974	0.299052	0.304667
YDL094C_YDL094C	2.97606	3.0421	2.82133
YDL095W_PMT1	-0.502116	-0.525643	-0.529649
YDL096C_OPI6	2.09376	1.66711	1.2702
YDL097C_RPN6	-0.306893	-0.241009	-0.213575
YDL098C_SNU23	0.00124121	0.0709799	0.133397
YDL099W_BUG1	0.1918	0.248045	0.0693177
YDL100C_GET3	-0.433253	-0.373217	-0.363141
YDL101C_DUN1	0.136966	0.174274	0.204521
YDL102W_POL3	-0.303693	-0.291891	-0.361114
YDL103C_QRI1	-0.398282	-0.297428	-0.315013
YDL104C_QRI7	0.127543	0.252565	0.204715
YDL105W_NSE4	0.839655	0.851528	0.684215
YDL106C_PHO2	-0.0994584	-0.136438	-0.15187
YDL107W_MSS2	0.367753	0.564589	0.537339
YDL108W_KIN28	0.477393	0.513884	0.441667
YDL108W_KIN28_unspliced	1.25509	0.770823	0.805287
YDL109C_YDL109C	2.50922	2.34004	2.30262
YDL110C_TMA17	0.718093	0.676247	0.586997
YDL111C_RRP42	-0.272449	-0.385301	-0.343358
YDL112W_TRM3	-0.343392	-0.359086	-0.371981
YDL113C_ATG20	0.153078	0.25581	0.253456
YDL114W-A_YDL114W-A	1.31264	1.0636	-0.0249462
YDL114W_YDL114W	1.99447	2.23986	2.20775
YDL115C_IWR1	0.176983	0.193553	-0.068691
YDL115C_IWR1_unspliced	2.8846	2.94531	2.8841
YDL116W_NUP84	-0.328	-0.38407	-0.39758
YDL117W_CYK3	-0.322484	-0.243441	-0.299171
YDL118W_YDL118W	1.54946	1.18311	0.0487958
YDL119C_YDL119C	-0.132914	0.0646654	-0.0478975
YDL120W_YFH1	-0.396867	-0.420352	-0.36485
YDL121C_YDL121C	-0.186112	-0.261097	-0.255109
YDL122W_UBP1	-0.262735	-0.256059	-0.433909
YDL123W_SNA4	0.847884	0.69882	0.726937
YDL124W_YDL124W	0.18237	0.417084	0.332123
YDL125C_HNT1	0.328005	0.38257	0.351396
YDL125C_HNT1_unspliced	0.609709	0.903913	0.760035
YDL126C_CDC48	-0.262417	-0.173534	-0.240555
YDL127W_PCL2	-0.650112	-0.646371	-0.75599
YDL128W_VCX1	-0.440017	-0.554173	-0.477583
YDL129W_YDL129W	-0.175566	-0.268292	-0.332205
YDL130W-A_STF1	-0.144835	0.208963	0.0864774
YDL130W_RPP1B	-0.502799	-0.683607	-0.577932
YDL130W_RPP1B_unspliced	1.30289	1.18529	1.25665
YDL131W_LYS21	-0.376354	-0.330094	-0.365228
YDL132W_CDC53	-0.260072	-0.183722	-0.153425
YDL133C-A_RPL41B	-0.574678	-0.674703	-0.342255
YDL133W_SRF1	0.641447	0.587893	0.555538
YDL134C_PPH21	-0.307194	-0.351414	-0.32883
YDL135C_RDI1	-0.151719	-0.0949758	-0.100055
YDL136W_RPL35B	-0.449002	-0.501639	-0.504629
YDL136W_RPL35B_unspliced	1.0653	1.08324	1.0343
YDL137W_ARF2	-0.443549	-0.315627	-0.351907
YDL137W_ARF2_5prime_unspliced	-0.159379	-0.221008	-0.147761
YDL138W_RGT2	-0.0471742	-0.230929	-0.15287
YDL139C_SCM3	0.600906	0.606353	0.370054
YDL140C_RPO21	-0.356254	-0.40802	-0.417876
YDL141W_BPL1	0.0411386	0.00295569	0.0236541
YDL142C_CRD1	-0.283373	-0.25805	-0.134241
YDL143W_CCT4	-0.346768	-0.372658	-0.405505
YDL144C_YDL144C	-0.301254	-0.400678	-0.373957
YDL145C_COP1	-0.300485	-0.3444	-0.346996
YDL146W_LDB17	0.195649	0.090868	0.156784
YDL147W_RPN5	-0.184328	-0.116695	-0.171127
YDL148C_NOP14	-0.0924989	-0.0376028	-0.240178
YDL149W_ATG9	0.311198	0.321275	0.333029
YDL150W_RPC53	-0.100378	-0.144811	-0.340917
YDL151C_BUD30	0.481471	-0.538996	-1.56727
YDL152W_YDL152W	Inf	Inf	Inf
YDL153C_SAS10	-0.303833	-0.298434	-0.525286
YDL154W_MSH5	1.83371	1.70248	1.6956
YDL155W_CLB3	-0.0139287	-0.0454949	-0.102557
YDL156W_CMR1	0.214716	0.295233	0.304618
YDL157C_YDL157C	-0.259494	-0.28224	-0.182331
YDL158C_YDL158C	-0.125575	-0.0963155	-0.0262078
YDL159C-B_YDL159C-B	1.12818	1.88232	0.738507
YDL159W-A_YDL159W-A	Inf	Inf	Inf
YDL159W_STE7	-0.0718103	-0.0930014	-0.112478
YDL160C-A_MHF2	0.446055	0.206551	0.27054
YDL160C_DHH1	-0.354457	-0.266521	-0.314647
YDL161W_ENT1	-0.305611	-0.28179	-0.392093
YDL162C_YDL162C	1.94962	1.77008	2.00189
YDL163W_YDL163W	-1.07107	0.901292	-2.42014
YDL164C_CDC9	-0.0534755	-0.0334441	-0.0436415
YDL165W_CDC36	-0.368248	-0.446587	-0.219432
YDL166C_FAP7	-0.51628	-0.529327	-0.490836
YDL167C_NRP1	-0.180311	-0.205994	-0.343677
YDL168W_SFA1	-0.282752	-0.276232	-0.228161
YDL169C_UGX2	-0.529407	-0.014807	-0.12811
YDL170W_UGA3	1.05475	1.12733	0.972855
YDL171C_GLT1	-0.241855	-0.306169	-0.224081
YDL172C_YDL172C	2.01135	1.84118	1.7952
YDL173W_PAR32	-0.426933	-0.370862	-0.442186
YDL174C_DLD1	-0.0446575	0.0751499	0.00477529
YDL175C_AIR2	0.0842109	-0.0769084	0.0136068
YDL176W_YDL176W	0.572586	0.57254	0.470825
YDL177C_YDL177C	0.925132	0.847591	0.728001
YDL178W_DLD2	-0.31064	-0.200039	-0.205254
YDL179W_PCL9	0.0311962	0.118705	-0.0239211
YDL180W_YDL180W	-0.183359	-0.269902	-0.116424
YDL181W_INH1	-0.452206	-0.426776	-0.509081
YDL182W_LYS20	-0.352505	-0.441445	-0.344599
YDL183C_YDL183C	0.938593	0.921185	0.883348
YDL184C_RPL41A	-0.588838	-0.6371	-0.749307
YDL185C-A_YDL185C-A	0.659984	-0.771108	-1.00125
YDL185W_VMA1	-0.26569	-0.336499	-0.357758
YDL186W_YDL186W	0.835115	0.749901	0.216655
YDL187C_YDL187C	1.49312	1.34996	1.35076
YDL188C_PPH22	-0.399441	-0.408473	-0.34778
YDL189W_RBS1	-0.343567	-0.14984	-0.390308
YDL189W_RBS1_5prime_unspliced	-0.294395	-0.302344	-0.165599
YDL190C_UFD2	-0.176606	-0.156949	-0.165632
YDL191W_RPL35A	-0.46639	-0.528865	-0.43661
YDL191W_RPL35A_unspliced	0.759528	0.614621	0.667715
YDL192W_ARF1	-0.466457	-0.511587	-0.382401
YDL193W_NUS1	-0.16745	-0.0682911	-0.156542
YDL194W_SNF3	-0.140308	-0.247289	-0.373584
YDL195W_SEC31	-0.331313	-0.284615	-0.30519
YDL196W_YDL196W	1.49937	1.4725	1.08951
YDL197C_ASF2	2.26308	2.27446	2.11911
YDL198C_GGC1	-0.508366	-0.351299	-0.377608
YDL199C_YDL199C	0.0400447	0.0904241	0.0754704
YDL200C_MGT1	0.246482	0.217914	0.26052
YDL201W_TRM8	-0.267109	-0.336076	-0.438749
YDL202W_MRPL11	-0.547449	-0.343006	-0.32419
YDL203C_ACK1	0.195292	0.220389	0.266962
YDL204W_RTN2	1.67983	1.84095	1.71754
YDL205C_HEM3	-0.373387	-0.366254	-0.326032
YDL206W_YDL206W	0.61133	0.538036	0.543755
YDL207W_GLE1	0.185882	0.23375	0.0733379
YDL208W_NHP2	-0.412287	-0.504735	-0.591187
YDL209C_CWC2	-0.0578002	-0.0834126	-0.280765
YDL210W_UGA4	0.176587	0.222876	0.182056
YDL211C_YDL211C	-0.405755	-0.537804	-0.629952
YDL212W_SHR3	-0.409659	-0.483835	-0.420121
YDL213C_NOP6	-0.0519587	-0.0576554	-0.284512
YDL214C_PRR2	2.1704	2.06187	2.03382
YDL215C_GDH2	1.72601	1.62223	1.59088
YDL216C_RRI1	0.839156	0.875955	0.766
YDL217C_TIM22	0.264181	0.191811	0.213554
YDL218W_YDL218W	1.23303	1.03978	1.00973
YDL219W_DTD1	0.22408	0.2814	0.288357
YDL219W_DTD1_unspliced	0.242922	-1.51675	-0.535905
YDL220C_CDC13	0.307558	0.310271	0.280226
YDL221W_YDL221W	0.339379	0.694823	0.399417
YDL222C_FMP45	0.100528	-0.00820191	0.13513
YDL223C_HBT1	1.42553	1.46043	1.3563
YDL224C_WHI4	-0.365932	-0.40322	-0.442253
YDL225W_SHS1	-0.48477	-0.394008	-0.440668
YDL226C_GCS1	-0.129087	-0.171862	-0.0873216
YDL227C_HO	-0.341037	-0.431084	-0.485773
YDL228C_YDL228C	-0.174908	-0.237251	-0.492235
YDL229W_SSB1	-0.373176	-0.475328	-0.423639
YDL230W_PTP1	-0.0440215	-0.0656962	-0.112036
YDL231C_BRE4	1.70504	1.60152	1.59503
YDL232W_OST4	-0.54789	-0.708921	-0.506909
YDL233W_MFG1	-0.176045	-0.0896773	-0.130503
YDL234C_GYP7	0.0350923	0.266382	0.254875
YDL235C_YPD1	-0.489834	-0.431323	-0.472521
YDL236W_PHO13	-0.41553	-0.366185	-0.386661
YDL237W_AIM6	-0.00724585	-0.0164339	-0.0132368
YDL238C_GUD1	0.854566	0.873543	0.920763
YDL239C_ADY3	1.44736	1.42838	1.40043
YDL240C-A_YDL240C-A	Inf	NA	Inf
YDL240W_LRG1	-0.434789	-0.502006	-0.530502
YDL241W_YDL241W	0.536695	0.60301	0.807482
YDL242W_YDL242W	2.01092	2.03957	1.83953
YDL243C_AAD4	2.15133	2.19368	2.12225
YDL244W_THI13	0.758543	0.776801	1.03328
YDL245C_HXT15	1.50921	1.31817	1.57711
YDL246C_SOR2	#NAME?	#NAME?	#NAME?
YDL247W-A_YDL247W-A	1.1142	1.11041	1.73555
YDL247W_MPH2	1.58104	1.12886	1.17736
YDL248W_COS7	1.06351	1.13928	1.18009
YDR001C_NTH1	0.192496	0.278265	0.211638
YDR002W_YRB1	-0.321376	-0.272743	-0.391283
YDR003W-A_YDR003W-A	0.597443	0.682607	0.757134
YDR003W_RCR2	0.543589	0.578752	0.647438
YDR004W_RAD57	1.61753	1.63715	1.63628
YDR005C_MAF1	0.846691	0.898225	0.780026
YDR005C_MAF1_unspliced	0.281859	-0.371526	0.231678
YDR006C_SOK1	-0.14108	-0.192154	-0.312463
YDR007W_TRP1	2.01111	2.02208	1.91286
YDR008C_YDR008C	2.36802	2.24814	2.05712
YDR009W_GAL3	1.24716	1.32738	1.19456
YDR010C_YDR010C	-0.295663	-0.673305	-1.20452
YDR011W_SNQ2	-0.15268	-0.203509	-0.145399
YDR012W_RPL4B	-0.380437	-0.5454	-0.442144
YDR013W_PSF1	0.932617	0.860956	0.94803
YDR014W-A_HED1	0.253167	0.733413	0.446374
YDR014W_RAD61	0.934891	0.821711	0.885329
YDR015C_YDR015C	#NAME?	0.519352	#NAME?
YDR016C_DAD1	0.00412953	-0.035538	0.225806
YDR017C_KCS1	0.457858	0.524371	0.31698
YDR018C_YDR018C	0.857762	0.97927	0.914561
YDR019C_GCV1	0.43165	0.809616	0.781548
YDR020C_DAS2	0.838907	0.735868	0.700924
YDR021W_FAL1	0.208671	0.2313	0.0294683
YDR022C_ATG31	1.57362	1.60722	1.60065
YDR023W_SES1	-0.232417	-0.246201	-0.285701
YDR024W_FYV1	0.933707	-0.00922918	0.854825
YDR025W_RPS11A	-0.40157	-0.51386	-0.420504
YDR025W_RPS11A_unspliced	-0.0450694	-0.413512	-0.166096
YDR026C_NSI1	0.742032	0.759344	0.592346
YDR027C_VPS54	-0.240719	-0.250026	-0.246127
YDR028C_REG1	-0.086622	-0.0297494	-0.101875
YDR029W_YDR029W	0.666008	-0.257088	-1.52055
YDR030C_RAD28	-0.0229968	0.0729654	0.00621073
YDR031W_MIX14	-0.524898	-0.24257	-0.398538
YDR032C_PST2	-0.211011	-0.155431	-0.103678
YDR033W_MRH1	-0.257519	-0.349954	-0.391906
YDR034C-A_YDR034C-A	0.412657	0.319	0.427214
YDR034C-D_YDR034C-D_unspliced	1.73289	1.18798	0.929827
YDR034C_LYS14	0.655832	0.713098	0.662162
YDR034W-B_YDR034W-B	0.0463311	-0.0707577	-0.246957
YDR035W_ARO3	-0.37915	-0.210698	-0.270427
YDR036C_EHD3	0.0926487	0.0721722	0.0569104
YDR037W_KRS1	-0.325234	-0.278388	-0.360902
YDR038C_ENA5	0.085631	0.0275494	0.00751269
YDR039C_ENA2	-0.0907611	-0.121102	-0.116368
YDR040C_ENA1	-0.102513	-0.103212	-0.460752
YDR041W_RSM10	-0.102384	0.0293662	0.0303632
YDR042C_YDR042C	0.00299696	0.00842796	-0.095251
YDR043C_NRG1	-0.507947	-0.640603	-0.454571
YDR044W_HEM13	-0.23316	-0.296231	-0.289252
YDR045C_RPC11	0.194868	0.0909865	0.0102471
YDR046C_BAP3	-0.251692	-0.319446	-0.296328
YDR047W_HEM12	1.04945	0.965346	0.949301
YDR048C_YDR048C	0.904942	1.14475	1.07895
YDR049W_VMS1	0.18534	0.260436	0.140281
YDR050C_TPI1	-0.478316	-0.503039	-0.434903
YDR051C_DET1	-0.172732	-0.203477	-0.132379
YDR052C_DBF4	-0.316943	-0.327666	-0.497619
YDR053W_YDR053W	-1.22218	-0.420821	-0.556896
YDR054C_CDC34	0.0461001	-0.0174578	-0.0927759
YDR055W_PST1	-0.459971	-0.204403	-0.435216
YDR056C_YDR056C	-0.418352	-0.443123	-0.516073
YDR057W_YOS9	0.18843	0.182847	0.132074
YDR058C_TGL2	-0.143024	0.11148	0.0323879
YDR059C_UBC5	-0.365008	-0.284429	-0.23125
YDR059C_UBC5_unspliced	-0.713642	-1.10385	-0.677232
YDR060W_MAK21	-0.143702	-0.161264	-0.36005
YDR061W_YDR061W	0.013583	0.149035	0.077295
YDR062W_LCB2	-0.296434	-0.380821	-0.379288
YDR063W_AIM7	0.377159	0.433987	0.523411
YDR064W_RPS13	-0.535226	-0.609326	-0.455313
YDR064W_RPS13_unspliced	2.03419	1.8871	1.95324
YDR065W_RRG1	1.11029	1.1427	1.06031
YDR066C_RTR2	0.13817	0.0188092	0.194957
YDR067C_OCA6	0.0465275	0.0676894	0.0500887
YDR068W_DOS2	0.112108	0.132205	-0.014828
YDR069C_DOA4	0.00354904	0.0562268	-0.0121458
YDR070C_FMP16	0.416034	0.811218	0.527972
YDR071C_PAA1	-0.518313	-0.526388	-0.43472
YDR072C_IPT1	-0.260844	-0.37715	-0.385426
YDR073W_SNF11	1.27898	1.11813	1.10618
YDR074W_TPS2	-0.291058	-0.218723	-0.247256
YDR075W_PPH3	-0.463093	-0.532587	-0.581639
YDR076W_RAD55	1.31188	1.30405	1.20907
YDR077W_SED1	-0.218734	-0.0999226	-0.472812
YDR078C_SHU2	1.71478	1.45872	1.75371
YDR079C-A_TFB5	-0.0307073	0.13523	0.331974
YDR079W_PET100	-0.617087	-0.441261	-0.572746
YDR080W_VPS41	0.20022	0.291042	0.20062
YDR081C_PDC2	-0.16003	-0.175808	-0.222519
YDR082W_STN1	2.80399	2.78021	2.7475
YDR083W_RRP8	-0.183557	-0.194037	-0.432719
YDR084C_TVP23	-0.389391	-0.393503	-0.311806
YDR085C_AFR1	0.171724	0.364603	0.177302
YDR086C_SSS1	-0.124589	-0.187376	-0.2039
YDR087C_RRP1	-0.560124	-0.602892	-0.815828
YDR088C_SLU7	-0.478509	-0.235902	-0.408436
YDR089W_YDR089W	-0.0143412	0.0471963	0.139155
YDR090C_YDR090C	0.137198	0.0645283	0.11242
YDR091C_RLI1	-0.258958	-0.387596	-0.357414
YDR092W_UBC13	-0.358298	-0.233836	-0.292905
YDR092W_UBC13_unspliced	0.138462	0.0938849	0.206383
YDR093W_DNF2	-0.381935	-0.463664	-0.426739
YDR094W_YDR094W	-0.477146	-0.774054	-0.614665
YDR095C_YDR095C	1.1398	-0.416925	-0.229277
YDR096W_GIS1	-0.151668	-0.240461	-0.244848
YDR097C_MSH6	0.0811606	0.181844	0.077775
YDR098C-B_YDR098C-B_unspliced	0.105297	0.0676908	-0.504632
YDR098C_GRX3	-0.391354	-0.340174	-0.327527
YDR099W_BMH2	-0.221364	-0.149949	-0.152247
YDR099W_BMH2_5prime_unspliced	-0.0961178	-0.0817699	-0.0703152
YDR100W_TVP15	-0.154055	-0.191735	-0.0327972
YDR101C_ARX1	-0.213034	-0.315244	-0.463855
YDR102C_YDR102C	1.87132	1.95992	1.9959
YDR103W_STE5	0.413628	0.325489	0.792629
YDR104C_SPO71	-0.0835665	-0.0129491	-0.101965
YDR105C_TMS1	-0.136561	-0.206802	-0.158202
YDR106W_ARP10	-0.17943	-0.501695	-0.146554
YDR107C_TMN2	-0.0850994	0.00781314	-0.126732
YDR108W_TRS85	0.683832	0.579951	0.521501
YDR109C_YDR109C	1.01597	1.04281	1.01108
YDR110W_FOB1	0.147303	0.190325	0.0477401
YDR111C_ALT2	0.216636	0.0991004	0.179588
YDR112W_IRC2	2.85014	2.89183	2.82272
YDR113C_PDS1	-0.202343	-0.138643	-0.242751
YDR114C_YDR114C	1.46691	1.52208	1.44454
YDR115W_YDR115W	-0.410426	-0.326164	-0.274621
YDR116C_MRPL1	-0.319948	-0.228735	-0.193127
YDR117C_TMA64	-0.146431	-0.0107999	-0.0464466
YDR118W-A_YDR118W-A	0.195529	0.222804	0.35563
YDR118W_APC4	0.591268	0.523651	0.63814
YDR119W-A_COX26	-0.243325	-0.274838	-0.0748637
YDR119W_VBA4	-0.327337	-0.383153	-0.330426
YDR120C_TRM1	-0.300403	-0.427281	-0.547557
YDR121W_DPB4	-0.360234	-0.454698	-0.559211
YDR122W_KIN1	-0.18175	-0.112183	-0.180662
YDR123C_INO2	0.872853	0.822225	0.743035
YDR124W_YDR124W	1.57042	1.58892	1.46542
YDR125C_ECM18	1.61081	1.55439	1.528
YDR126W_SWF1	0.802577	0.583471	0.571858
YDR127W_ARO1	-0.306797	-0.147286	-0.164134
YDR128W_MTC5	0.225598	0.327384	0.148478
YDR129C_SAC6	-0.219751	-0.204471	-0.182376
YDR129C_SAC6_unspliced	0.3626	0.148597	0.699535
YDR130C_FIN1	1.03222	1.06896	1.01357
YDR131C_YDR131C	1.4357	1.43394	1.40172
YDR132C_YDR132C	0.203835	0.236269	0.217319
YDR133C_YDR133C	1.10341	1.19049	1.05531
YDR134C_YDR134C	1.08691	1.11652	0.948068
YDR135C_YCF1	-0.355519	-0.318648	-0.284958
YDR136C_VPS61	0.87515	0.924497	0.489082
YDR137W_RGP1	0.560898	0.54973	0.529262
YDR138W_HPR1	0.465479	0.478405	0.387505
YDR139C_RUB1	-0.158642	-0.139779	-0.11861
YDR139C_RUB1_unspliced	1.26012	1.1561	1.09749
YDR140W_MTQ2	0.33849	0.337452	0.34737
YDR141C_DOP1	-0.144877	-0.0936154	-0.103564
YDR142C_PEX7	-0.337788	-0.354446	-0.365632
YDR143C_SAN1	-0.224149	-0.391575	-0.394728
YDR144C_MKC7	-0.215598	-0.40892	-0.339203
YDR145W_TAF12	-0.0771599	-0.14333	-0.214778
YDR146C_SWI5	-0.0791088	-0.0764352	-0.058632
YDR147W_EKI1	2.49517	2.4054	2.3
YDR148C_KGD2	-0.244847	-0.203557	-0.180971
YDR149C_YDR149C	-0.375303	1.09797	0.0703537
YDR150W_NUM1	-0.21884	-0.217998	-0.241619
YDR151C_CTH1	-0.142645	-0.197272	-0.0165083
YDR152W_GIR2	-0.0741969	-0.108659	-0.0724375
YDR153C_ENT5	-0.389787	-0.415168	-0.529758
YDR154C_YDR154C	-0.122813	-0.175331	-0.139481
YDR155C_CPR1	-0.139997	-0.202557	-0.132709
YDR156W_RPA14	-0.498154	-0.568466	-0.560367
YDR157W_YDR157W	-0.27457	-0.500452	-0.307284
YDR158W_HOM2	-0.42272	-0.348105	-0.297193
YDR159W_SAC3	0.0932157	0.000385873	-0.0590447
YDR160W_SSY1	1.21983	1.16077	1.18345
YDR161W_YDR161W	-0.359752	-0.41683	-0.505833
YDR162C_NBP2	-0.0288978	-0.0242319	-0.101152
YDR163W_CWC15	0.099012	0.0569106	-0.0959776
YDR164C_SEC1	-0.0714652	-0.035229	-0.0980508
YDR165W_TRM82	0.021244	-0.0265397	-0.100045
YDR166C_SEC5	-0.00155736	-0.0145839	-0.0625184
YDR167W_TAF10	-0.152251	-0.253121	-0.317642
YDR168W_CDC37	-0.280225	-0.160938	-0.205102
YDR169C-A_YDR169C-A	2.20172	2.60007	2.0643
YDR169C_STB3	0.0464263	0.034654	-0.041916
YDR170C_SEC7	-0.34571	-0.29936	-0.327282
YDR170W-A_YDR170W-A	0.350845	0.0969348	0.0310439
YDR171W_HSP42	-0.192156	-0.109096	0.0945148
YDR172W_SUP35	-0.364486	-0.321807	-0.432533
YDR173C_ARG82	0.0565626	-0.0343268	0.0190242
YDR174W_HMO1	0.791889	0.722497	0.778489
YDR175C_RSM24	-0.235432	-0.133645	-0.198854
YDR176W_NGG1	0.0438122	0.0432517	-0.0228459
YDR177W_UBC1	-0.421637	-0.384701	-0.449449
YDR178W_SDH4	-0.295932	-0.348933	-0.257258
YDR179C_CSN9	0.129119	0.113753	0.0585412
YDR179W-A_YDR179W-A	0.25405	0.17805	0.148783
YDR180W_SCC2	-0.215134	-0.330215	-0.247243
YDR181C_SAS4	0.419602	0.515836	0.432439
YDR182W-A_YDR182W-A	0.849677	1.12832	1.11879
YDR182W_CDC1	-0.210517	-0.254251	-0.195055
YDR183C-A_YDR183C-A	-0.0301247	0.0236019	-0.127198
YDR183W_PLP1	0.378062	0.396655	0.318821
YDR184C_ATC1	-0.198605	-0.158403	-0.355816
YDR185C_UPS3	-0.801466	-0.733011	-0.81873
YDR186C_YDR186C	-0.190527	-0.256044	-0.328184
YDR187C_YDR187C	0.0998794	-0.967731	-0.563067
YDR188W_CCT6	-0.354796	-0.394489	-0.441732
YDR189W_SLY1	0.00458024	-0.0214416	-0.0488868
YDR190C_RVB1	-0.333328	-0.334357	-0.422235
YDR191W_HST4	-0.0731376	-0.0279597	-0.0433468
YDR192C_NUP42	-0.274671	-0.229832	-0.271549
YDR193W_YDR193W	3.26457	3.00776	2.8969
YDR194C_MSS116	-0.293155	-0.131248	-0.260286
YDR194W-A_YDR194W-A	Inf	Inf	Inf
YDR195W_REF2	-0.0516898	0.0684346	-0.0871522
YDR196C_CAB5	0.666859	0.695028	0.630223
YDR197W_CBS2	-0.274539	-0.324841	-0.216202
YDR198C_RKM2	0.445656	0.422669	0.304111
YDR199W_YDR199W	0.924488	0.353826	1.13117
YDR200C_VPS64	-0.281395	-0.270837	-0.318033
YDR201W_SPC19	-0.184894	-0.135633	-0.267284
YDR202C_RAV2	-0.123235	-0.106397	0.00452379
YDR203W_YDR203W	2.27132	2.14524	2.23642
YDR204W_COQ4	-0.00207387	0.0773108	0.115994
YDR205W_MSC2	0.380028	0.245149	0.285024
YDR206W_EBS1	1.10908	0.827849	0.879513
YDR207C_UME6	-0.0440707	-0.0949178	-0.184389
YDR208W_MSS4	-0.347516	-0.382252	-0.427512
YDR209C_YDR209C	0.669703	0.723277	0.712835
YDR210C-D_YDR210C-D_unspliced	0.0962226	-0.231338	-0.403542
YDR210W-B_YDR210W-B_unspliced	0.743242	0.830221	0.356567
YDR210W_YDR210W	1.29212	1.23476	1.35627
YDR211W_GCD6	0.0452685	0.0529355	-0.0840226
YDR212W_TCP1	-0.424948	-0.411093	-0.402709
YDR213W_UPC2	-0.303134	-0.397693	-0.364078
YDR214W_AHA1	-0.0875428	0.0819914	0.172794
YDR215C_YDR215C	2.41371	3.41909	3.16352
YDR216W_ADR1	0.66958	0.98305	0.90459
YDR217C_RAD9	-0.157021	-0.113387	-0.2334
YDR218C_SPR28	0.603665	0.679898	1.2103
YDR219C_MFB1	-0.286995	-0.284567	-0.313126
YDR220C_YDR220C	1.14726	1.43348	1.14145
YDR221W_GTB1	0.673283	0.801544	0.697677
YDR222W_YDR222W	-0.19865	-0.293109	-0.203961
YDR223W_CRF1	1.55688	1.40193	1.45765
YDR224C_HTB1	-0.53266	-0.679038	-0.712327
YDR225W_HTA1	-0.522835	-0.662139	-0.541508
YDR226W_ADK1	-0.54879	-0.540931	-0.40458
YDR227W_SIR4	-0.0492746	-0.0798953	-0.152444
YDR228C_PCF11	0.809963	0.750803	0.596732
YDR229W_IVY1	-0.255776	-0.259697	-0.380152
YDR230W_YDR230W	1.46597	1.78472	0.735899
YDR231C_COX20	0.133437	0.238294	0.273801
YDR232W_HEM1	-0.362204	-0.508821	-0.49471
YDR233C_RTN1	0.110301	-0.0564305	-0.0766642
YDR234W_LYS4	-0.0691701	-0.187976	-0.0814574
YDR235W_PRP42	0.305155	0.195447	0.281168
YDR236C_FMN1	1.10898	1.05514	1.17452
YDR237W_MRPL7	-0.581728	-0.378831	-0.426668
YDR238C_SEC26	-0.391769	-0.345506	-0.410706
YDR239C_YDR239C	0.0094441	0.0295196	-0.0384749
YDR240C_SNU56	-0.178728	-0.153651	-0.280207
YDR241W_BUD26	1.72889	2.01922	1.89822
YDR242W_AMD2	1.81621	1.81208	1.76621
YDR243C_PRP28	0.556184	0.553023	0.455261
YDR244W_PEX5	-0.342357	-0.178766	-0.253598
YDR245W_MNN10	-0.367239	-0.439525	-0.460383
YDR246W-A_YDR246W-A	1.29542	1.02307	1.43434
YDR246W_TRS23	0.28614	0.193587	0.168131
YDR247W_VHS1	-0.258513	-0.469695	-0.387611
YDR248C_YDR248C	-0.282116	-0.0808382	-0.108839
YDR249C_YDR249C	0.677267	0.686416	0.631974
YDR250C_YDR250C	1.77914	1.50119	1.42038
YDR251W_PAM1	-0.243273	-0.243329	-0.254687
YDR252W_BTT1	1.23184	0.991348	1.26005
YDR253C_MET32	-0.47579	-0.412845	-0.485175
YDR254W_CHL4	0.234526	0.264305	0.245953
YDR255C_RMD5	0.311804	0.396493	0.33674
YDR256C_CTA1	0.618852	0.757881	0.620706
YDR257C_RKM4	1.34965	1.28534	1.24108
YDR258C_HSP78	0.0154926	0.391989	0.52353
YDR259C_YAP6	0.665488	0.665692	0.570958
YDR260C_SWM1	0.763236	0.786091	0.700191
YDR261C-D_YDR261C-D_unspliced	0.477193	0.855181	-0.26687
YDR261C_EXG2	0.1579	0.1565	0.0290949
YDR261W-B_YDR261W-B_unspliced	0.468031	0.367461	0.0418864
YDR262W_YDR262W	-0.100843	-0.0588618	-0.171058
YDR263C_DIN7	0.913034	0.877128	1.00232
YDR264C_AKR1	-0.022549	-0.0308168	0.0561249
YDR265W_PEX10	1.7618	1.67124	1.69526
YDR266C_HEL2	-0.230887	-0.329241	-0.312129
YDR267C_CIA1	0.249467	0.195232	0.143381
YDR268W_MSW1	0.581536	0.631607	0.614601
YDR269C_YDR269C	3.99682	3.66148	3.28513
YDR270W_CCC2	-0.623038	-0.43171	-0.482299
YDR271C_YDR271C	2.79422	2.66267	2.16726
YDR272W_GLO2	-0.386648	-0.346459	-0.302077
YDR273W_DON1	1.1145	1.16485	1.08946
YDR274C_YDR274C	-0.100678	0.328804	-0.630985
YDR275W_BSC2	0.499764	0.427441	0.292057
YDR276C_PMP3	-0.205918	-0.330767	-0.275443
YDR277C_MTH1	0.611993	0.599512	0.255796
YDR278C_YDR278C	-1.56537	-1.18787	-0.0913013
YDR279W_RNH202	0.249199	0.228844	0.232805
YDR280W_RRP45	-0.174545	-0.230517	-0.303529
YDR281C_PHM6	-1.40022	-1.19134	-1.55217
YDR282C_YDR282C	0.453689	0.632122	0.596655
YDR283C_GCN2	0.0306962	0.0778011	-0.00627806
YDR284C_DPP1	-0.239555	-0.254295	-0.232922
YDR285W_ZIP1	2.27462	2.26506	2.14787
YDR286C_YDR286C	0.0818287	0.222851	0.29494
YDR287W_INM2	0.521991	0.599363	0.578058
YDR288W_NSE3	0.246608	0.298334	0.270268
YDR289C_RTT103	-0.282268	-0.204052	-0.312236
YDR290W_YDR290W	NA	NA	NA
YDR291W_HRQ1	1.07805	0.981905	0.974537
YDR292C_SRP101	-0.354765	-0.397699	-0.398764
YDR293C_SSD1	0.220061	0.258123	0.173846
YDR294C_DPL1	-0.256292	-0.233968	-0.229271
YDR295C_HDA2	-0.279051	-0.194729	-0.243655
YDR296W_MHR1	-0.425409	-0.287266	-0.363061
YDR297W_SUR2	-0.265274	-0.476838	-0.454743
YDR298C_ATP5	-0.382345	-0.369271	-0.392202
YDR299W_BFR2	-0.0964825	-0.0701204	-0.229736
YDR300C_PRO1	-0.395191	-0.442508	-0.477741
YDR301W_CFT1	-0.219278	-0.294651	-0.247365
YDR302W_GPI11	-0.455468	-0.538262	-0.505339
YDR303C_RSC3	-0.413784	-0.520022	-0.433961
YDR304C_CPR5	-0.323597	-0.346024	-0.276658
YDR305C_HNT2	-0.248813	-0.304913	-0.130788
YDR305C_HNT2_unspliced	0.91921	0.8914	0.836984
YDR306C_YDR306C	0.0893709	0.0781275	0.0593738
YDR307W_PMT7	0.224534	0.154822	0.176424
YDR308C_SRB7	-0.20529	-0.151231	-0.125022
YDR309C_GIC2	-0.34822	-0.392735	-0.40496
YDR310C_SUM1	-0.283597	-0.32587	-0.332856
YDR311W_TFB1	-0.12317	-0.0694668	-0.1523
YDR312W_SSF2	-0.362466	-0.27257	-0.486876
YDR313C_PIB1	0.242419	0.278971	0.240012
YDR314C_RAD34	0.965623	0.949603	0.809146
YDR315C_IPK1	0.582463	0.536139	0.728518
YDR316W-B_YDR316W-B_unspliced	#NAME?	7.31827	9.32603
YDR316W_OMS1	-0.0633015	0.15154	0.102218
YDR317W_HIM1	0.30434	0.387064	0.363665
YDR318W_MCM21	1.4807	1.4705	1.37692
YDR318W_MCM21_unspliced	2.13969	1.80017	2.00417
YDR319C_YFT2	0.471499	0.338333	0.44006
YDR320C-A_DAD4	-0.565527	-0.640729	-0.532583
YDR320C_SWA2	0.338269	0.482436	0.308017
YDR320W-B_YDR320W-B	2.44731	2.052	2.19965
YDR321W_ASP1	-0.136684	-0.269894	-0.091592
YDR322C-A_TIM11	-0.0934004	0.030024	-0.0671141
YDR322W_MRPL35	-0.496441	-0.412375	-0.382494
YDR323C_PEP7	0.0788385	0.0542581	0.155293
YDR324C_UTP4	-0.365895	-0.373922	-0.519667
YDR325W_YCG1	0.740061	0.755153	0.666854
YDR326C_YSP2	-0.328797	-0.46362	-0.497319
YDR327W_YDR327W	0.488476	-1.2381	0.322639
YDR328C_SKP1	-0.0256514	-0.0322091	-0.0497057
YDR329C_PEX3	-0.311137	-0.313212	-0.299829
YDR330W_UBX5	-0.00960198	-0.0346381	0.0165807
YDR331W_GPI8	-0.547372	-0.590317	-0.490424
YDR332W_IRC3	1.38717	1.3851	1.32908
YDR333C_RQC1	-0.0616345	-0.0666778	-0.0864881
YDR334W_SWR1	-0.119187	-0.142432	-0.189929
YDR335W_MSN5	-0.382182	-0.363279	-0.328707
YDR336W_YDR336W	1.11151	1.08558	1.0718
YDR337W_MRPS28	-0.493785	-0.347158	-0.418978
YDR338C_YDR338C	0.326259	0.291892	0.315651
YDR339C_FCF1	-0.52219	-0.52697	-0.615942
YDR340W_YDR340W	-0.0444949	-0.49267	-0.367025
YDR341C_YDR341C	-0.428241	-0.491641	-0.456983
YDR342C_HXT7	0.0705116	0.272684	0.00468541
YDR343C_HXT6	0.882686	0.736292	0.348346
YDR344C_YDR344C	1.07323	1.04341	1.17182
YDR345C_HXT3	-0.129287	-0.438256	-0.480002
YDR346C_SVF1	-0.310373	-0.283823	-0.410715
YDR347W_MRP1	-0.372304	-0.284012	-0.323625
YDR348C_PAL1	-0.485299	-0.425612	-0.505881
YDR349C_YPS7	0.408719	0.382687	0.318026
YDR350C_ATP22	0.419478	0.449775	0.388066
YDR351W_SBE2	-0.323761	-0.27581	-0.428823
YDR352W_YPQ2	0.00776723	-0.16557	-0.107095
YDR353W_TRR1	-0.351251	-0.389445	-0.341371
YDR354C-A_YDR354C-A	3.41769	2.09494	1.93256
YDR354W_TRP4	0.145057	0.106581	0.130368
YDR355C_YDR355C	Inf	NA	NA
YDR356W_SPC110	-0.316267	-0.292526	-0.393182
YDR357C_CNL1	0.0729178	0.150656	0.217417
YDR358W_GGA1	-0.108323	-0.0452408	-0.0454379
YDR359C_EAF1	-0.255818	-0.19459	-0.275228
YDR360W_OPI7	2.0547	1.14545	1.49477
YDR361C_BCP1	0.155277	0.058426	0.076713
YDR362C_TFC6	0.322594	0.31159	0.29399
YDR363W-A_SEM1	-0.0370535	-0.0822674	-0.0778033
YDR363W_ESC2	0.761714	0.763617	0.60852
YDR364C_CDC40	1.55882	1.53459	1.38646
YDR365C_ESF1	-0.203485	-0.213723	-0.466103
YDR365W-B_YDR365W-B_unspliced	-0.697763	-0.965091	-0.735679
YDR366C_YDR366C	0.709168	0.832546	0.715946
YDR367W_KEI1	-0.365473	-0.467236	-0.263701
YDR367W_KEI1_unspliced	0.0786847	-0.134008	-0.584949
YDR368W_YPR1	-0.400439	-0.439713	-0.351363
YDR369C_XRS2	0.699532	0.736579	0.641082
YDR370C_DXO1	1.07008	1.03389	1.01497
YDR371C-A_YDR371C-A	1.30987	1.10174	0.674332
YDR371W_CTS2	0.545938	0.541581	0.566188
YDR372C_VPS74	-0.331293	-0.317964	-0.364675
YDR373W_FRQ1	-0.238186	-0.187663	-0.200959
YDR374C_PHO92	-0.159148	0.0902606	0.167224
YDR374W-A_WIP1	0.746395	0.738802	0.835299
YDR375C_BCS1	0.173162	0.293135	0.318655
YDR376W_ARH1	-0.163952	-0.0450017	-0.149259
YDR377W_ATP17	-0.0338536	-0.0464148	0.0840846
YDR378C_LSM6	0.000408073	-0.0846736	-0.0167252
YDR379C-A_SDH6	0.611334	0.786618	0.775866
YDR379W_RGA2	1.03693	1.03057	0.865023
YDR380W_ARO10	-0.594947	-0.356915	-0.400755
YDR381C-A_YDR381C-A	-0.0597065	0.214466	0.150204
YDR381C-A_YDR381C-A_unspliced	0.23073	0.11058	0.291379
YDR381W_YRA1	-0.561276	-0.618138	-0.539658
YDR381W_YRA1_unspliced	-0.553206	-0.450282	-0.485438
YDR382W_RPP2B	-0.474012	-0.539876	-0.416269
YDR383C_NKP1	0.79789	0.910616	0.847884
YDR384C_ATO3	0.0469664	-0.288713	-0.317665
YDR385W_EFT2	-0.338217	-0.487976	-0.413915
YDR386W_MUS81	1.57966	1.58794	1.58892
YDR387C_YDR387C	1.70411	1.64556	1.69557
YDR388W_RVS167	-0.474557	-0.438009	-0.443842
YDR389W_SAC7	-0.270658	-0.283972	-0.422942
YDR390C_UBA2	-0.158567	-0.176863	-0.170713
YDR391C_YDR391C	0.888498	0.945054	0.993998
YDR392W_SPT3	0.228758	0.232599	0.165016
YDR393W_SHE9	-0.0577894	0.0211156	-0.0503527
YDR394W_RPT3	-0.354127	-0.288229	-0.268712
YDR395W_SXM1	-0.439842	-0.370789	-0.437208
YDR396W_YDR396W	-0.933754	-1.26947	-0.912392
YDR397C_NCB2	-0.272353	-0.250457	-0.227328
YDR397C_NCB2_unspliced	0.207362	-0.161716	-0.332599
YDR398W_UTP5	-0.138624	-0.144025	-0.311757
YDR399W_HPT1	0.245819	0.152889	0.107308
YDR400W_URH1	-0.0345664	-0.027224	-0.0973602
YDR401W_YDR401W	1.2225	1.03869	1.77897
YDR402C_DIT2	3.2561	3.01979	2.76799
YDR403W_DIT1	1.38609	1.39727	1.3831
YDR404C_RPB7	-0.229187	-0.416142	-0.297082
YDR405W_MRP20	-0.219406	-0.151367	-0.275866
YDR406W-A_YDR406W-A	0.584722	0.89866	0.810896
YDR406W_PDR15	1.22207	1.25658	1.27495
YDR407C_TRS120	-0.384522	-0.403599	-0.377188
YDR408C_ADE8	0.253623	0.272965	0.36498
YDR409W_SIZ1	-0.100068	-0.107314	-0.105248
YDR410C_STE14	-0.303601	-0.429095	-0.259509
YDR411C_DFM1	-0.191909	-0.125777	-0.0862853
YDR412W_RRP17	-0.380059	-0.444834	-0.627903
YDR413C_YDR413C	-0.335585	0.102042	-0.793875
YDR414C_ERD1	-0.12526	-0.284216	-0.176379
YDR415C_YDR415C	-0.110624	-0.133278	-0.0886348
YDR416W_SYF1	-0.275039	-0.219992	-0.286783
YDR417C_YDR417C	-0.177741	-0.106463	-0.429816
YDR418W_RPL12B	-0.543606	-0.599256	-0.504964
YDR419W_RAD30	0.55658	0.564983	0.542524
YDR420W_HKR1	-0.330748	-0.428558	-0.556599
YDR421W_ARO80	1.04415	1.04919	0.931638
YDR422C_SIP1	-0.176138	-0.21572	-0.249909
YDR423C_CAD1	0.199561	0.187106	0.265901
YDR424C_DYN2	-0.240716	-0.208837	-0.230183
YDR424C_DYN2_unspliced	0.837539	0.57122	0.170843
YDR425W_SNX41	-0.0305916	-0.00253903	0.0268312
YDR426C_YDR426C	0.26816	-0.140771	0.325537
YDR427W_RPN9	-0.38461	-0.312026	-0.251334
YDR428C_BNA7	0.0667553	-0.0577613	0.0762259
YDR429C_TIF35	-0.384719	-0.450162	-0.516273
YDR430C_CYM1	-0.252217	-0.0398818	-0.0879949
YDR431W_YDR431W	1.27383	1.22851	1.38094
YDR432W_NPL3	-0.268361	-0.329822	-0.39995
YDR433W_YDR433W	-0.349355	-0.460833	-0.814276
YDR434W_GPI17	-0.349884	-0.360365	-0.333616
YDR435C_PPM1	0.264997	0.326755	0.330082
YDR436W_PPZ2	-0.0769912	-0.128326	-0.145793
YDR437W_GPI19	0.848982	0.746012	0.782413
YDR438W_THI74	0.774546	0.638188	0.568393
YDR439W_LRS4	0.39435	0.377854	0.346203
YDR440W_DOT1	-0.369362	-0.428804	-0.432958
YDR441C_APT2	-0.0638597	-0.280241	-0.140364
YDR442W_YDR442W	2.3632	2.4242	1.83657
YDR443C_SSN2	0.00705293	-0.0167576	-0.0171033
YDR444W_YDR444W	0.689917	0.705089	0.59763
YDR445C_YDR445C	-0.576484	-1.31169	-0.692961
YDR446W_ECM11	0.0783123	-0.499139	-0.0860681
YDR447C_RPS17B	-0.596793	-0.612202	-0.36208
YDR447C_RPS17B_unspliced	0.757547	0.552078	0.620267
YDR448W_ADA2	0.0235812	0.0757556	0.00364768
YDR449C_UTP6	-0.20681	-0.154197	-0.309588
YDR450W_RPS18A	-0.565124	-0.589834	-0.439464
YDR450W_RPS18A_unspliced	-0.0247715	-0.27424	0.0531227
YDR451C_YHP1	-0.424192	-0.339186	-0.502902
YDR452W_PPN1	0.0456516	0.209073	0.170979
YDR453C_TSA2	0.48384	0.529994	0.648043
YDR454C_GUK1	-0.427062	-0.525064	-0.375636
YDR455C_YDR455C	3.05854	2.33758	2.72692
YDR456W_NHX1	0.0663103	-0.0209493	0.0273232
YDR457W_TOM1	-0.319348	-0.238859	-0.209779
YDR458C_HEH2	0.0927349	0.119436	0.0504818
YDR459C_PFA5	1.3037	1.21884	1.22286
YDR460W_TFB3	-0.184794	-0.218445	-0.318826
YDR461C-A_YDR461C-A	-0.536315	-0.336226	-0.24764
YDR461W_MFA1	-1.02037	-1.27635	-1.27521
YDR462W_MRPL28	-0.477811	-0.442446	-0.296753
YDR463W_STP1	-0.399745	-0.384587	-0.40299
YDR464C-A_YDR464C-A	NA	Inf	NA
YDR464W_SPP41	-0.271363	-0.29481	-0.390804
YDR465C_RMT2	0.108297	-0.0180606	-0.148518
YDR466W_PKH3	0.232147	0.18575	0.0329414
YDR467C_YDR467C	0.407893	0.240714	0.488765
YDR468C_TLG1	-0.195647	-0.247429	-0.218666
YDR469W_SDC1	0.294754	0.286697	0.207834
YDR470C_UGO1	-0.135977	-0.0523679	-0.156524
YDR471W_RPL27B	-0.473135	-0.597658	-0.554677
YDR471W_RPL27B_unspliced	1.21305	1.1149	1.09645
YDR472W_TRS31	-0.22774	-0.34436	-0.26478
YDR473C_PRP3	0.546917	0.592912	0.479854
YDR475C_JIP4	-0.0758339	-0.0843812	-0.0786508
YDR476C_YDR476C	-0.0833574	-0.0793568	0.0112578
YDR477W_SNF1	-0.344256	-0.287899	-0.319739
YDR478W_SNM1	0.805547	0.799022	0.732149
YDR479C_PEX29	0.486893	0.560401	0.56152
YDR480W_DIG2	0.620848	0.765029	0.710227
YDR481C_PHO8	-0.564847	-0.521951	-0.590077
YDR482C_CWC21	-0.0527267	-0.128028	-0.195353
YDR483W_KRE2	-0.0832334	-0.110996	-0.0890355
YDR484W_VPS52	-0.0685218	-0.0854744	-0.0314806
YDR485C_VPS72	0.0786523	0.143395	0.086512
YDR486C_VPS60	-0.232783	-0.253045	-0.220632
YDR487C_RIB3	-0.321293	-0.304852	-0.287006
YDR488C_PAC11	0.268381	0.320532	0.180682
YDR489W_SLD5	0.0196827	-0.132282	-0.0728819
YDR490C_PKH1	0.453977	0.484918	0.414896
YDR491C_YDR491C	1.43891	1.88493	1.85324
YDR492W_IZH1	-0.165042	-0.42725	-0.459751
YDR493W_MZM1	-0.579176	-0.536382	-0.437604
YDR494W_RSM28	-0.405411	-0.21275	-0.291982
YDR495C_VPS3	-0.0167101	0.0494375	0.0599852
YDR496C_PUF6	-0.350588	-0.326667	-0.554165
YDR497C_ITR1	-0.0817532	-0.204669	-0.0972647
YDR498C_SEC20	-0.205841	-0.301594	-0.309734
YDR499W_LCD1	1.39811	1.32229	1.22803
YDR500C_RPL37B	-0.4099	-0.556612	-0.449679
YDR500C_RPL37B_unspliced	1.06562	0.978865	0.912563
YDR501W_PLM2	0.0518334	-0.13474	-0.26823
YDR502C_SAM2	-0.348222	-0.351523	-0.156609
YDR503C_LPP1	-0.395959	-0.406469	-0.23984
YDR504C_SPG3	-0.098722	-0.145587	-0.0163963
YDR505C_PSP1	-0.222161	-0.235107	-0.239274
YDR506C_GMC1	0.707887	0.940969	0.811454
YDR507C_GIN4	-0.482321	-0.285318	-0.467829
YDR508C_GNP1	-0.124972	-0.252689	-0.199334
YDR509W_YDR509W	2.47926	-0.20276	1.59029
YDR510C-A_YDR510C-A	NA	NA	Inf
YDR510W_SMT3	-0.4953	-0.440256	-0.478579
YDR511W_SDH7	-0.50096	-0.304994	-0.271353
YDR512C_EMI1	-0.545512	-0.580069	-0.483517
YDR513W_GRX2	-0.452074	-0.357308	-0.181275
YDR514C_YDR514C	-0.29881	-0.335257	-0.395064
YDR515W_SLF1	-0.392554	-0.203901	-0.197007
YDR516C_EMI2	-0.408581	-0.154096	-0.0456239
YDR517W_GRH1	-0.228281	-0.265241	-0.184039
YDR518W_EUG1	-0.23087	-0.156215	-0.246725
YDR519W_FPR2	0.0970058	0.195126	0.0877507
YDR520C_URC2	-0.0998222	-0.110131	-0.142249
YDR521W_YDR521W	0.537462	0.430409	-0.539315
YDR522C_SPS2	-0.876472	-0.329151	-1.27986
YDR523C_SPS1	0.885772	1.1542	0.795578
YDR524C-A_YDR524C-A	1.47131	1.17786	0.398471
YDR524C-B_YDR524C-B	-0.249091	-0.441807	-0.385722
YDR524C_AGE1	0.0670119	-0.0336773	-0.111095
YDR524W-C_YDR524W-C	0.737863	0.577178	0.326168
YDR525W-A_SNA2	-0.403988	-0.538722	-0.291802
YDR525W_API2	0.575674	0.407597	1.7224
YDR526C_YDR526C	0.347211	0.865601	0.365743
YDR527W_RBA50	0.568983	0.553991	0.351582
YDR528W_HLR1	-0.395936	-0.279353	-0.447786
YDR529C_QCR7	-0.277619	-0.261031	-0.161569
YDR530C_APA2	1.80832	1.76969	1.78142
YDR531W_CAB1	-0.0566619	-0.0324955	0.059111
YDR532C_KRE28	0.503516	0.525615	0.483902
YDR533C_HSP31	-0.291186	-0.271039	-0.00622845
YDR534C_FIT1	1.69516	1.56258	1.10008
YDR535C_YDR535C	#NAME?	0.317433	#NAME?
YDR535C_YDR535C_unspliced	2.26089	1.96692	1.89485
YDR536W_STL1	-0.334132	-0.241766	-0.0925793
YDR537C_YDR537C	1.71029	1.205	0.773065
YDR538W_PAD1	0.638498	0.476041	0.526967
YDR539W_FDC1	0.35232	0.314357	0.311288
YDR540C_IRC4	0.767033	0.877727	0.683479
YDR541C_YDR541C	0.829053	0.78186	0.845866
YDR542W_PAU10	2.82899	2.91072	2.90172
YDR543C_YDR543C	1.01694	0.611575	0.405558
YDR544C_YDR544C	1.44002	1.36521	1.23935
YDR545C-A_YDR545C-A	-1.1048	#NAME?	-0.914179
YDR545W_YRF1-1	1.04397	1.87624	1.16042
YEL001C_IRC22	-0.607732	-0.586795	-0.558632
YEL002C_WBP1	-0.270482	-0.313797	-0.265201
YEL003W_GIM4	-0.361919	-0.460865	-0.413767
YEL003W_GIM4_unspliced	0.548252	0.524332	0.588683
YEL004W_YEA4	0.294677	0.251693	0.336042
YEL005C_VAB2	1.04521	1.05875	1.0573
YEL006W_YEA6	1.19324	1.11111	1.16958
YEL007W_MIT1	-0.210908	-0.271924	-0.219582
YEL008C-A_YEL008C-A	0.436395	0.28741	0.368334
YEL008W_YEL008W	0.0710193	-0.14124	0.0586335
YEL009C-A_YEL009C-A	2.94049	2.95416	2.49701
YEL009C_GCN4	0.424255	0.1529	0.17187
YEL010W_YEL010W	-1.07085	-0.966309	-0.00739212
YEL011W_GLC3	0.0986547	0.206507	0.206522
YEL012W_UBC8	-0.241407	-0.112663	-0.172476
YEL012W_UBC8_unspliced	0.840475	1.34316	0.925029
YEL013W_VAC8	-0.251802	-0.258865	-0.231177
YEL014C_YEL014C	Inf	NA	Inf
YEL015W_EDC3	-0.0332838	-0.133996	-0.129994
YEL016C_NPP2	1.39439	1.34356	1.3376
YEL017C-A_PMP2	-0.224876	-0.433874	-0.259587
YEL017W_GTT3	-0.0244974	-0.12781	-0.0274134
YEL018C-A_YEL018C-A	1.11667	1.41629	1.77015
YEL018W_EAF5	0.338077	0.414478	0.382853
YEL019C_MMS21	1.16183	1.1421	0.999314
YEL020C-B_YEL020C-B	-1.13408	-0.504216	-1.93805
YEL020C_YEL020C	0.636254	0.621535	0.593599
YEL020W-A_TIM9	-0.659805	-0.529661	-0.556068
YEL021W_URA3	-0.23539	-0.204231	-0.132739
YEL022W_GEA2	-0.423139	-0.447587	-0.397327
YEL023C_YEL023C	2.118	2.1888	2.04179
YEL024W_RIP1	-0.00982173	-0.0198817	0.0194041
YEL025C_YEL025C	1.3162	1.32196	1.31017
YEL026W_SNU13	-0.372579	-0.592033	-0.541496
YEL027W_VMA3	-0.25587	-0.325705	-0.339732
YEL028W_YEL028W	2.00605	1.83779	1.89822
YEL029C_BUD16	0.0198464	0.00676314	0.0398339
YEL030C-A_YEL030C-A	2.91901	2.84565	2.78375
YEL030W_ECM10	1.77927	1.77741	1.72136
YEL031W_SPF1	-0.268223	-0.238245	-0.281151
YEL032C-A_YEL032C-A	#NAME?	#NAME?	-0.201886
YEL032W_MCM3	-0.180499	-0.238044	-0.280039
YEL033W_MTC7	-0.305064	-0.440653	-0.403378
YEL034C-A_YEL034C-A	-0.37582	-0.51458	-0.978357
YEL034W_HYP2	-0.321226	-0.438061	-0.30017
YEL035C_UTR5	1.36037	1.69507	1.53652
YEL036C_ANP1	-0.168652	-0.233423	-0.324642
YEL037C_RAD23	-0.470506	-0.49314	-0.445065
YEL038W_UTR4	-0.139449	-0.22591	-0.142693
YEL039C_CYC7	0.0931996	0.394498	0.512407
YEL040W_UTR2	-0.106292	-0.23682	-0.25054
YEL041W_YEF1	0.865021	1.08158	1.01978
YEL042W_GDA1	-0.374287	-0.511007	-0.490711
YEL043W_YEL043W	0.112225	0.0898196	0.111098
YEL044W_IES6	0.339833	0.13762	0.1597
YEL045C_YEL045C	1.4585	0.998489	1.36284
YEL046C_GLY1	-0.129409	-0.204447	-0.242864
YEL047C_FRD1	-0.224714	-0.306361	-0.230868
YEL048C_TCA17	2.68256	2.57459	2.6818
YEL049W_PAU2	2.29904	2.6112	2.4296
YEL050C_RML2	-0.511428	-0.313548	-0.44115
YEL050W-A_YEL050W-A	-1.52563	-1.20031	0.0624107
YEL051W_VMA8	-0.44183	-0.355657	-0.376282
YEL052W_AFG1	0.309516	0.292898	0.342982
YEL053C_MAK10	0.131841	0.147144	0.142762
YEL053W-A_YEL053W-A	-0.333614	-0.556777	-0.386701
YEL054C_RPL12A	-0.441328	-0.586762	-0.376548
YEL055C_POL5	-0.269498	-0.287872	-0.404172
YEL056W_HAT2	-0.0474149	0.00766924	-0.0401312
YEL057C_YEL057C	0.855708	1.19127	0.796399
YEL058W_PCM1	-0.387196	-0.368152	-0.731429
YEL059C-A_SOM1	0.0210782	0.126955	-1.78728
YEL059W_HHY1	0.0736279	0.220515	-2.72352
YEL060C_PRB1	-0.23086	0.0106147	-0.0258882
YEL061C_CIN8	-0.263119	-0.345436	-0.447923
YEL062W_NPR2	0.91245	0.821996	0.790332
YEL063C_CAN1	2.79996	2.66033	2.55228
YEL064C_AVT2	0.0810369	-0.077551	-0.0447797
YEL065W_SIT1	0.671718	0.622497	0.556694
YEL066W_HPA3	-0.0616729	-0.0213871	0.111666
YEL067C_YEL067C	1.40587	1.31973	1.09097
YEL068C_YEL068C	0.475243	0.434141	0.381561
YEL069C_HXT13	0.689029	0.522142	1.52844
YEL070W_DSF1	0.00208748	0.819491	0.401314
YEL071W_DLD3	-0.190041	-0.182219	-0.165391
YEL072W_RMD6	1.30894	1.63348	1.59254
YEL073C_YEL073C	2.28483	2.39459	2.48999
YEL074W_YEL074W	1.52609	1.47679	1.20302
YEL075C_YEL075C	NA	NA	NA
YEL075W-A_YEL075W-A	0.375127	-0.147241	-0.394153
YEL076C-A_YEL076C-A	NA	Inf	Inf
YEL076C-A_YEL076C-A_unspliced	#NAME?	#NAME?	#NAME?
YEL076C_YEL076C	2.97405	3.16282	3.05843
YEL077C_YEL077C	1.5697	1.54272	1.48545
YEL077W-A_YEL077W-A	-1.32356	#NAME?	-0.858392
YER001W_MNN1	-0.310278	-0.231221	-0.325835
YER002W_NOP16	-0.455243	-0.427274	-0.607362
YER003C_PMI40	-0.424629	-0.381738	-0.351214
YER003C_PMI40_unspliced	0.235293	0.825318	0.545936
YER004W_FMP52	0.12217	0.0850386	0.16565
YER005W_YND1	0.519922	0.493936	0.492525
YER006C-A_YER006C-A	2.45169	2.02609	2.15596
YER006W_NUG1	-0.385199	-0.446472	-0.589173
YER007C-A_TMA20	-0.259326	-0.339901	-0.310862
YER007C-A_TMA20_unspliced	-0.414481	-0.401364	-0.458347
YER007W_PAC2	0.83941	0.984585	0.851281
YER008C_SEC3	-0.208274	-0.185019	-0.213065
YER009W_NTF2	-0.315654	-0.455022	-0.265167
YER010C_YER010C	-0.116642	-0.111269	-0.151428
YER011W_TIR1	-0.691588	-0.739853	-0.938456
YER012W_PRE1	-0.319379	-0.280262	-0.253517
YER013W_PRP22	-0.280123	-0.14668	-0.254163
YER014C-A_BUD25	NA	NA	NA
YER014C-A_BUD25_unspliced	2.81717	2.57243	2.485
YER014W_HEM14	-0.398638	-0.353021	-0.333497
YER015W_FAA2	0.729963	0.761307	0.874991
YER016W_BIM1	0.0609557	0.0186014	0.0108266
YER017C_AFG3	-0.354123	-0.276269	-0.323611
YER018C_SPC25	0.0510688	-0.173596	-0.0745156
YER019C-A_SBH2	-0.301142	-0.481453	-0.289092
YER019W_ISC1	-0.192852	-0.302904	-0.284242
YER020W_GPA2	0.191716	0.193076	0.259149
YER021W_RPN3	-0.349961	-0.327428	-0.256065
YER022W_SRB4	-0.122157	-0.0729948	-0.112139
YER023C-A_YER023C-A	0.609734	0.0370816	-1.36119
YER023W_PRO3	-0.440686	-0.45705	-0.428306
YER024W_YAT2	2.21539	2.09417	2.10005
YER025W_GCD11	-0.271518	-0.398205	-0.421478
YER026C_CHO1	-0.224625	-0.291607	-0.0890511
YER027C_GAL83	-0.397095	-0.350749	-0.373255
YER028C_MIG3	1.25768	1.21464	1.26123
YER029C_SMB1	-0.305024	-0.355211	-0.532959
YER030W_CHZ1	-0.164413	-0.0711947	-0.230863
YER031C_YPT31	-0.271766	-0.264748	-0.305949
YER032W_FIR1	-0.182796	-0.231444	-0.293662
YER033C_ZRG8	0.0213593	0.130056	0.0208885
YER034W_YER034W	-0.00413402	-0.0240304	-0.0587558
YER035W_EDC2	-0.256411	-0.392235	-0.249068
YER036C_ARB1	-0.403436	-0.516463	-0.512958
YER037W_PHM8	-0.354861	-0.288611	-0.388353
YER038C_KRE29	1.96592	1.85465	1.90568
YER038W-A_YER038W-A	1.74423	1.57426	1.6124
YER039C-A_YER039C-A	0.971399	0.889297	1.09756
YER039C_HVG1	1.48475	1.53647	1.44465
YER040W_GLN3	-0.148161	-0.0850965	-0.192681
YER041W_YEN1	2.06243	2.01991	1.95333
YER042W_MXR1	-0.641376	-0.637445	-0.610851
YER043C_SAH1	-0.342945	-0.448129	-0.363384
YER044C-A_MEI4	1.71534	1.63763	1.54589
YER044C-A_MEI4_unspliced	Inf	Inf	Inf
YER044C_ERG28	-0.181521	-0.34042	-0.142077
YER045C_ACA1	0.350801	0.382734	0.226374
YER046W-A_YER046W-A	0.456188	0.315735	-0.483493
YER046W_SPO73	0.64879	0.4746	0.574552
YER047C_SAP1	-0.362841	-0.420439	-0.500141
YER048C_CAJ1	-0.140315	-0.0986972	-0.14324
YER048W-A_ISD11	0.499523	0.50796	0.483388
YER049W_TPA1	-0.351902	-0.420173	-0.47155
YER050C_RSM18	-0.443159	-0.392204	-0.416753
YER051W_JHD1	0.337173	0.326264	0.326238
YER052C_HOM3	-0.407829	-0.310939	-0.286643
YER053C-A_YER053C-A	-0.0418018	-0.123486	0.306672
YER053C_PIC2	0.1559	0.266744	0.265825
YER054C_GIP2	0.964357	1.23925	1.08838
YER055C_HIS1	-0.581687	-0.490403	-0.476452
YER056C-A_RPL34A	-0.465135	-0.514256	-0.42661
YER056C-A_RPL34A_unspliced	0.363557	0.106063	0.253056
YER056C_FCY2	-0.148555	-0.207899	-0.326789
YER057C_HMF1	-0.332974	-0.37059	-0.264868
YER058W_PET117	-0.267067	0.127634	0.000699553
YER059W_PCL6	-0.362002	-0.446231	-0.3364
YER060W-A_FCY22	0.69465	0.42163	0.262238
YER060W_FCY21	-0.249079	-0.358042	-0.490616
YER061C_CEM1	0.554582	0.509748	0.512767
YER062C_GPP2	-0.613447	-0.417585	-0.465269
YER063W_THO1	-0.150335	-0.101701	-0.0495731
YER064C_VHR2	-0.304832	-0.178479	-0.373643
YER065C_ICL1	1.51036	1.40723	1.30659
YER066C-A_YER066C-A	1.19603	1.87864	0.865048
YER066W_RRT13	2.69814	2.66553	2.68044
YER067C-A_YER067C-A	1.68442	2.1943	2.48931
YER067W_RGI1	-0.101162	-0.00694686	-0.108027
YER068C-A_YER068C-A	2.2842	2.01243	2.26411
YER068W_MOT2	-0.372376	-0.419837	-0.481945
YER069W_ARG5,6	0.320174	0.420655	0.365033
YER070W_RNR1	-0.301967	-0.471387	-0.433732
YER071C_TDA2	0.207576	0.219912	0.181815
YER072W_VTC1	-0.851071	-0.908143	-0.873759
YER073W_ALD5	-0.435842	-0.306809	-0.307022
YER074W-A_YOS1	-0.180922	-0.207922	-0.0878552
YER074W-A_YOS1_unspliced	-0.168064	-0.263436	-0.29147
YER074W_RPS24A	-0.458443	-0.530945	-0.465817
YER074W_RPS24A_unspliced	1.03577	0.893502	0.840486
YER075C_PTP3	0.0814357	0.0108063	-0.0414918
YER076C_YER076C	2.02821	1.9672	1.91836
YER076W-A_YER076W-A	1.2202	1.07043	1.18467
YER077C_YER077C	-0.345176	-0.137814	-0.391321
YER078C_ICP55	-0.136454	-0.0728367	-0.0515025
YER078W-A_YER078W-A	2.80545	2.71442	2.54418
YER079C-A_YER079C-A	2.24584	0.753179	2.79391
YER079W_YER079W	-0.714581	-0.545951	-0.558325
YER080W_AIM9	-0.509848	-0.398786	-0.425398
YER081W_SER3	0.217446	0.296144	0.289708
YER082C_UTP7	-0.219603	-0.187259	-0.423474
YER083C_GET2	-0.238215	-0.37457	-0.271779
YER084W-A_YER084W-A	0.460901	0.732471	2.05371
YER084W_YER084W	-0.00503005	0.186	-0.119676
YER085C_YER085C	1.29085	1.32931	1.46794
YER086W_ILV1	-0.332706	-0.386897	-0.360175
YER087C-A_YER087C-A	1.55146	1.04268	1.34574
YER087C-B_SBH1	-0.0678416	-0.142634	-0.262879
YER087W_AIM10	-0.0125983	0.104822	0.0286078
YER088C-A_YER088C-A	0.231549	0.0661075	0.0658375
YER088C_DOT6	-0.181459	-0.229255	-0.32356
YER088W-B_YER088W-B	-0.363536	-0.869882	-0.374357
YER089C_PTC2	-0.126133	-0.147154	-0.130884
YER090C-A_YER090C-A	Inf	Inf	Inf
YER090W_TRP2	-0.435422	-0.364459	-0.371697
YER091C-A_YER091C-A	0.284262	-1.95843	-0.544032
[truncated: 5,474 more rows]
