# Supplementary material for: Decapping factor Dcp2 controls mRNA abundance and translation to adjust metabolism and filamentation to nutrient availability
Source: eLife journal article supplement (doi:10.7554/elife.85545), 2023-06-02
Supplement: fig3-data1 [file Figure 3 – source data 1.xlsx]

## Sheet: Sheet1
iESR (283)	rESR (585)
YAL061W	YKL144C
YBR072W	YML060W
YBR126C	YKL110C
YCL040W	YIL096C
YDL022W	YNL227C
YDL222C	YLR336C
YDR074W	YGR251W
YDR096W	YGR054W
YDR171W	YHR042W
YDR380W	YPR034W
YDR516C	YLL036C
YEL011W	YML082W
YER150W	YOR233W
YFL014W	YMR277W
YFR053C	YOR217W
YGR088W	YLL038C
YGR161C	YLR433C
YGR250C	YBL035C
YHR096C	YOR188W
YIL099W	YNL102W
YJR104C	YDR097C
YKL035W	YDR211W
YKL151C	YKL154W
YLL019C	YDR190C
YLL026W	YGR229C
YLL039C	YIL021W
YLR178C	YNL153C
YLR258W	YHR144C
YLR327C	YAL035W
YML100W	YKR079C
YML128C	YDR449C
YMR081C	YDR161W
YMR105C	YJR003C
YMR173W	YML018C
YMR251W-A	YLR405W
YNL241C	YGR195W
YOL084W	YGL070C
YOR317W	YJR043C
YOR374W	YIL110W
YPL230W	YNR009W
YPR149W	YBR089W
YBL049W	YLR183C
YBL064C	YER070W
YBL075C	YBR030W
YBL078C	YNL228W
YBR006W	YMR269W
YBR026C	YNR054C
YBR052C	YLR400W
YBR053C	YDL151C
YBR056W	YNL303W
YBR139W	YKR025W
YBR149W	YDR152W
YBR169C	YNL292W
YBR183W	YOL097C
YBR204C	YBR106W
YBR230C	YOR253W
YBR269C	YBL077W
YBR285W	YHR013C
YBR287W	YDR233C
YCL035C	YPR080W
YCL042W	YBR118W
YCR004C	YLR134W
YCR061W	YLR044C
YCR091W	YFL045C
YDL021W	YER009W
YDL023C	YHR133C
YDL027C	YLR447C
YDL110C	YHR026W
YDL124W	YKL080W
YDL199C	YOR209C
YDL204W	YMR079W
YDR001C	YAL038W
YDR003W	YBR249C
YDR032C	YPR060C
YDR059C	YGR151C
YDR070C	YGR152C
YDR085C	YGR228W
YDR169C	YGR081C
YDR204W	YIL079C
YDR254W	YIL104C
YDR255C	YDR440W
YDR258C	YNR024W
YDR272W	YOR252W
YDR286C	YKR060W
YDR287W	YHL013C
YDR350C	YOL124C
YDR358W	YPL043W
YDR368W	YAL025C
YDR453C	YBR266C
YDR512C	YLR017W
YDR513W	YPL207W
YDR533C	YBR252W
YEL005C	YGR078C
YEL012W	YGL148W
YEL039C	YOR271C
YEL060C	YKR043C
YER035W	YOL022C
YER037W	YNR003C
YER038C	YLR073C
YER053C	YLR146C
YER079W	YPR016C
YER103W	YNL255C
YER119C	YOR146W
YER141W	YIL019W
YER142C	YHR148W
YER158C	YLR074C
YFL044C	YPL044C
YGL006W	YPR137W
YGL010W	YDL060W
YGL037C	YAL059W
YGL059W	YER118C
YGL087C	YGL097W
YGL096W	YNL066W
YGL104C	YHR025W
YGL121C	YML106W
YGL156W	YGL008C
YGL180W	YEL042W
YGL208W	YBR283C
YGL248W	YCR034W
YGR008C	YMR215W
YGR019W	YDL084W
YGR023W	YBR154C
YGR043C	YDR023W
YGR127W	YDR429C
YGR149W	YLR150W
YGR194C	YNL010W
YGR201C	YPL037C
YGR209C	YHR193C
YGR237C	YJL208C
YGR248W	YOR277C
YGR256W	YGR285C
YHL021C	YHL011C
YHR087W	YPR041W
YHR097C	YPR136C
YHR104W	YPL217C
YHR112C	YMR128W
YHR137W	YPR112C
YHR138C	YLL034C
YHR171W	YPL263C
YIL045W	YKL205W
YIL097W	YPR010C
YIL101C	YJL050W
YIL107C	YJL080C
YIL113W	YOR361C
YIL120W	YGR265W
YIL124W	YGR162W
YIL136W	YBR079C
YIR037W	YOR287C
YIR038C	YER082C
YIR039C	YFL023W
YJL015C	YLR051C
YJL048C	YMR310C
YJL057C	YGR283C
YJL066C	YMR014W
YJL068C	YBR155W
YJL103C	YDL150W
YJL132W	YER127W
YJL141C	YMR239C
YJL142C	YGR280C
YJL144W	YHR088W
YJL155C	YNL186W
YJL161W	YBR267W
YJL163C	YNL299W
YJL164C	YDL062W
YJR008W	YKL143W
YJR025C	YDR120C
YJR059W	YGR173W
YJR066W	YML043C
YJR096W	YLR243W
YKL026C	YKR026C
YKL065C	YPL245W
YKL067W	YDL111C
YKL091C	YDR300C
YKL093W	YER049W
YKL100C	YNL163C
YKL103C	YJL198W
YKL121W	YER036C
YKL124W	YEL040W
YKL133C	YER043C
YKL142W	YAR075W
YKL150W	YAR073W
YKL188C	YLR432W
YKL193C	YHR216W
YKR009C	YML056C
YKR011C	YMR309C
YKR049C	YPR187W
YKR058W	YJR063W
YKR066C	YMR235C
YKR067W	YPR118W
YKR076W	YJR007W
YLL020C	YLR372W
YLR001C	YOR260W
YLR080W	YLR291C
YLR142W	YLR293C
YLR149C	YLR083C
YLR152C	YCR053W
YLR250W	YHR064C
YLR251W	YDR037W
YLR252W	YPL160W
YLR267W	YGR094W
YLR270W	YNL247W
YLR290C	YBR121C
YLR299W	YIL078W
YLR312C	YHR019C
YLR345W	YLR060W
YLR356W	YPR033C
YLR370C	YMR307W
YML004C	YPR074C
YML042W	YCL045C
YML110C	YJR143C
YML131W	YGR185C
YMR041C	YDR321W
YMR053C	YLR397C
YMR090W	YKR092C
YMR110C	YJR071W
YMR136W	YNL075W
YMR139W	YNL114C
YMR155W	YNL113W
YMR169C	YNL022C
YMR170C	YLR186W
YMR173W-A	YDR184C
YMR174C	YPL211W
YMR181C	YFL002C
YMR196W	YPR144C
YMR197C	YHR196W
YMR250W	YIR012W
YMR251W	YLR401C
YMR253C	YMR093W
YMR271C	YDL167C
YMR291W	YDR365C
YMR297W	YCL054W
YMR302C	YNL061W
YMR304W	YOR294W
YMR315W	YOR145C
YNL009W	YHR169W
YNL015W	YJL122W
YNL055C	YNL141W
YNL115C	YER110C
YNL134C	YJR041C
YNL160W	YDR341C
YNL183C	YOR168W
YNL194C	YMR308C
YNL195C	YDR385W
YNL200C	YGR264C
YNL208W	YPL226W
YNL274C	YDR091C
YNL305C	YLR249W
YNR001C	YGL120C
YNR002C	YMR217W
YOL048C	YPL183C
YOL082W	YNL313C
YOL083W	YJL109C
YOL150C	YCL037C
YOL151W	YMR229C
YOL153C	YBR084W
YOR052C	YHR020W
YOR152C	YMR049C
YOR161C	YDR412W
YOR173W	YDR312W
YOR185C	YKL078W
YOR220W	YOR243C
YOR285W	YDR465C
YOR289W	YFR001W
YPL004C	YDR361C
YPL054W	YKL099C
YPL087W	YBL028C
YPL152W	YIL127C
YPL154C	YHR066W
YPL165C	YHR197W
YPL166W	YOR272W
YPL186C	YJR070C
YPL196W	YLR222C
YPL203W	YGR123C
YPR026W	YKL181W
YPR067W	YCL059C
YPR098C	YKR081C
YPR150W	YKL021C
YPR151C	YNL110C
YPR184W	YLR221C
YCR062W	YDR413C
YDR474C	YJL148W
YJL017W	YCR016W
YJL021C	YLR003C
	YHR052W
	YKL009W
	YDR101C
	YDR324C
	YDR083W
	YGL099W
	YGL111W
	YDL051W
	YMR131C
	YPR110C
	YMR290C
	YBL039C
	YML093W
	YGL078C
	YLL008W
	YER006W
	YDR496C
	YGR145W
	YGR245C
	YNL175C
	YNL174W
	YLR196W
	YOR206W
	YGR103W
	YLR276C
	YGR160W
	YNL182C
	YLR409C
	YLR129W
	YLR002C
	YNL132W
	YNL248C
	YGR128C
	YNL062C
	YGL171W
	YKR056W
	YBR247C
	YJR002W
	YLR198C
	YOR309C
	YLR197W
	YLR175W
	YOR310C
	YLR449W
	YHR170W
	YBL024W
	YBR143C
	YDR165W
	YDR398W
	YPR190C
	YCR072C
	YJL069C
	YDL201W
	YHR065C
	YLL011W
	YER126C
	YDR087C
	YDL153C
	YPR142C
	YPR143W
	YPL146C
	YKL172W
	YNL308C
	YKL082C
	YGL029W
	YPL266W
	YOL077C
	YBR142W
	YBR034C
	YLR435W
	YGR187C
	YHR089C
	YCR057C
	YBL068W
	YPR163C
	YOR224C
	YLR413W
	YJR124C
	YPL212C
	YPL086C
	YNL256W
	YIR026C
	YGR200C
	YJL125C
	YNL120C
	YKR024C
	YBL054W
	YNL124W
	YBR061C
	YLR063W
	YML080W
	YGL169W
	YDL063C
	YGR158C
	YIL020C
	YHR143W-A
	YGR083C
	YER165W
	YAL036C
	YDL031W
	YJL188C
	YPL238C
	YPL237W
	YOR276W
	YNR043W
	YPR145W
	YGL213C
	YPL273W
	YMR321C
	YJL183W
	YHR068W
	YJR064W
	YDL143W
	YJL014W
	YJL002C
	YGR124W
	YMR212C
	YHL039W
	YMR243C
	YBR238C
	YDR346C
	YDR280W
	YCL031C
	YBR025C
	YOL041C
	YLL035W
	YOR004W
	YOR001W
	YOR210W
	YAL003W
	YJL033W
	YLR076C
	YNL151C
	YLR172C
	YFL022C
	YDR172W
	YOR169C
	YOR021C
	YDL050C
	YOR095C
	YLR065C
	YBR246W
	YGL225W
	YNR053C
	YPL235W
	YNL001W
	YDR339C
	YJR014W
	YLR412W
	YKL122C
	YMR234W
	YCR035C
	YPR169W
	YGR272C
	YNL302C
	YOR063W
	YLR340W
	YOL039W
	YOL120C
	YOR096W
	YOL040C
	YNL002C
	YLR009W
	YJL189W
	YDL136W
	YNL067W
	YMR143W
	YGL103W
	YOL121C
	YLR333C
	YOL127W
	YOR182C
	YHR021C
	YKL156W
	YLR167W
	YHR128W
	YJL191W
	YMR146C
	YDL081C
	YJL136C
	YML022W
	YLR367W
	YOR167C
	YMR121C
	YLR029C
	YMR116C
	YDR454C
	YJL138C
	YLR264W
	YKL180W
	YKR059W
	YOR234C
	YDL083C
	YLR325C
	YMR194W
	YMR230W
	YOR293W
	YBL072C
	YPL143W
	YML026C
	YGR085C
	YBL092W
	YBL027W
	YBR084C-A
	YBR181C
	YGL189C
	YGR027C
	YER131W
	YGR118W
	YKR094C
	YPR132W
	YIL052C
	YPL090C
	YER056C-A
	YNL162W
	YGR034W
	YML063W
	YNL209W
	YLL045C
	YGL030W
	YML073C
	YPL142C
	YKL006W
	YNL119W
	YLR448W
	YLR388W
	YHL033C
	YER074W
	YBR189W
	YBR191W
	YGL135W
	YPL220W
	YLR048W
	YLL044W
	YGL123W
	YIL018W
	YFR031C-A
	YDR025W
	YJR123W
	YDR417C
	YLR062C
	YNL301C
	YPL198W
	YGL076C
	YJL177W
	YER102W
	YPR102C
	YMR242C
	YGL147C
	YHR203C
	YBR048W
	YNL178W
	YGR148C
	YGL031C
	YGR214W
	YIL133C
	YOR369C
	YDL082W
	YEL054C
	YDR064W
	YLR344W
	YPR044C
	YGL102C
	YNL069C
	YJL190C
	YML024W
	YMR142C
	YPL079W
	YPL081W
	YNL096C
	YJR145C
	YLR061W
	YHR010W
	YDR450W
	YHR141C
	YPR043W
	YER117W
	YBL087C
	YHL001W
	YKR057W
	YDR471W
	YKL056C
	YLR441C
	YOR312C
	YDR447C
	YJR094W-A
	YLR185W
	YDR382W
	YDR418W
	YDR012W
	YCR031C
	YBR031W
	YEL026W
	YLR075W
	YIL148W
	YLR339C
	YKL081W
	YDL191W
	YDL061C
	YDR500C
	YDL075W
	YER025W
