# Supplementary material for: Decapping factor Dcp2 controls mRNA abundance and translation to adjust metabolism and filamentation to nutrient availability
Source: eLife journal article supplement (doi:10.7554/elife.85545), 2023-06-02
Supplement: fig3-data2 [file Figure 3 – source data 2.xlsx]

## Sheet: C to T ratios
gene_ID	C/T_WT	C/T_dcp2	C/T_dcp2 vs C/T_WT		gene_ID	C/T_WT	C/T_xrn1	C/T_xrn1 vs C/T_WT
YAL001C	0.390351	0.799297	2.04764		YAL001C	0.390351	0.356911	0.914335
YAL002W	0.442488	0.519839	1.17481		YAL002W	0.442488	0.259697	0.586902
YAL003W	1.51414	1.69096	1.11678		YAL003W	1.51414	2.75975	1.82265
YAL005C	0.586864	1.52745	2.60274		YAL005C	0.586864	1.77497	3.0245
YAL007C	0.798368	0.927118	1.16127		YAL007C	0.798368	0.905422	1.13409
YAL008W	0.448289	0.726171	1.61987		YAL008W	0.448289	0.60919	1.35892
YAL009W	0.278791	0.349849	1.25488		YAL009W	0.278791	0.20369	0.730617
YAL010C	0.317942	0.390773	1.22907		YAL010C	0.317942	0.171205	0.538479
YAL011W	0.377063	0.675758	1.79216		YAL011W	0.377063	0.2286	0.606265
YAL012W	1.16627	1.83758	1.5756		YAL012W	1.16627	1.84894	1.58535
YAL013W	0.164051	0.413996	2.52359		YAL013W	0.164051	0.172895	1.05391
YAL014C	0.435762	0.615177	1.41173		YAL014C	0.435762	0.335946	0.77094
YAL015C	0.159731	0.385349	2.41249		YAL015C	0.159731	0.212172	1.32831
YAL016W	1.17836	1.4403	1.22229		YAL016W	1.17836	1.2088	1.02583
YAL017W	0.311303	0.355056	1.14055		YAL017W	0.311303	0.233064	0.748673
YAL019W	0.583284	0.905153	1.55182		YAL019W	0.583284	0.492965	0.845154
YAL020C	0.333759	0.646721	1.93769		YAL020C	0.333759	0.445709	1.33542
YAL021C	0.165928	0.257013	1.54894		YAL021C	0.165928	0.168814	1.01739
YAL022C	0.198376	0.25787	1.29991		YAL022C	0.198376	0.218203	1.09995
YAL023C	0.137126	0.117499	0.856869		YAL023C	0.137126	0.0886397	0.64641
YAL024C	0.456142	0.814706	1.78608		YAL024C	0.456142	0.264849	0.580627
YAL025C	0.536368	0.744841	1.38868		YAL025C	0.536368	0.534654	0.996805
YAL026C	0.658465	0.770083	1.16951		YAL026C	0.658465	0.580529	0.881639
YAL027W	0.483678	0.73814	1.5261		YAL027W	0.483678	0.304853	0.63028
YAL028W	0.112722	0.382401	3.39243		YAL028W	0.112722	0.160135	1.42062
YAL029C	0.47281	0.770868	1.6304		YAL029C	0.47281	0.468239	0.990332
YAL030W	0.268139	0.228707	0.852941		YAL030W	0.268139	0.253777	0.946438
YAL031C	0.79488	1.61107	2.02681		YAL031C	0.79488	0.479778	0.603585
YAL032C	0.187509	0.266688	1.42227		YAL032C	0.187509	0.108749	0.579966
YAL033W	0.550549	0.627447	1.13967		YAL033W	0.550549	0.798917	1.45113
YAL034C	0.165759	0.3089	1.86355		YAL034C	0.165759	0.137	0.826505
YAL034W-A	0.491451	0.621167	1.26394		YAL034W-A	0.491451	0.244318	0.497136
YAL035W	0.671895	1.23068	1.83166		YAL035W	0.671895	1.33316	1.98417
YAL036C	0.813239	1.06684	1.31185		YAL036C	0.813239	0.996231	1.22502
YAL037W	0.333925	0.330696	0.990329		YAL037W	0.333925	0.124431	0.372632
YAL038W	2.03822	1.87491	0.919877		YAL038W	2.03822	3.5833	1.75806
YAL039C	0.229074	0.452748	1.97642		YAL039C	0.229074	0.25976	1.13395
YAL040C	0.80294	1.15484	1.43826		YAL040C	0.80294	0.593996	0.739777
YAL041W	0.249231	0.355126	1.42489		YAL041W	0.249231	0.17854	0.716364
YAL042W	0.671507	0.865337	1.28865		YAL042W	0.671507	0.89202	1.32839
YAL043C	0.1416	0.143414	1.01281		YAL043C	0.1416	0.154445	1.09071
YAL044C	0.297869	0.442217	1.4846		YAL044C	0.297869	0.586819	1.97006
YAL044W-A	1.13037	1.55964	1.37976		YAL044W-A	1.13037	1.39193	1.23139
YAL045C	3.79532	3.69054	0.972394		YAL046C	0.292822	0.263314	0.89923
YAL046C	0.292822	0.209686	0.716086		YAL047C	0.312012	0.264607	0.848067
YAL047C	0.312012	0.538017	1.72435		YAL048C	0.348102	0.249282	0.716118
YAL048C	0.348102	0.609028	1.74957		YAL049C	0.317379	0.38864	1.22453
YAL049C	0.317379	0.34161	1.07635		YAL051W	0.332002	0.156123	0.470248
YAL051W	0.332002	0.405285	1.22073		YAL053W	0.490793	0.437525	0.891466
YAL053W	0.490793	0.627134	1.2778		YAL055W	0.172097	0.132115	0.767679
YAL055W	0.172097	0.31609	1.8367		YAL056W	0.346859	0.227753	0.656615
YAL056W	0.346859	0.377026	1.08697		YAL058W	0.242043	0.179011	0.739584
YAL058W	0.242043	0.268375	1.10879		YAL059W	0.634468	0.515301	0.812177
YAL059W	0.634468	0.782179	1.23281		YAL060W	0.238471	0.290168	1.21679
YAL060W	0.238471	0.505912	2.12148		YAL061W	0.1476	0.0684675	0.463872
YAL061W	0.1476	0.130225	0.882281		YAL062W	2.19824	1.04785	0.476674
YAL062W	2.19824	1.28124	0.582846		YAL063C-A	0.417925	0.507392	1.21407
YAL063C-A	0.417925	1.69848	4.06409		YAL064W-B	0.125076	0.0853745	0.682582
YAL064W-B	0.125076	0.326642	2.61155		YAL067C	0.200112	0.224148	1.12011
YAL067C	0.200112	0.287662	1.43751		YAR002C-A	0.602338	0.753105	1.2503
YAR002C-A	0.602338	0.550046	0.913186		YAR002W	0.293469	0.194998	0.664459
YAR002W	0.293469	0.326359	1.11207		YAR003W	0.260556	0.350425	1.34491
YAR003W	0.260556	0.34106	1.30897		YAR007C	0.313979	0.2322	0.739542
YAR007C	0.313979	0.323708	1.03099		YAR008W	0.414571	0.312135	0.752912
YAR008W	0.414571	0.649585	1.56689		YAR014C	0.414921	0.459375	1.10714
YAR014C	0.414921	0.742671	1.78991		YAR015W	0.599295	1.06561	1.7781
YAR015W	0.599295	0.79866	1.33267		YAR018C	0.318557	0.201284	0.631864
YAR018C	0.318557	0.310988	0.97624		YAR019C	0.0654464	0.0492564	0.752622
YAR019C	0.0654464	0.0966067	1.47612		YAR023C	0.331924	0.147921	0.445646
YAR023C	0.331924	0.576941	1.73817		YAR027W	0.276512	0.155428	0.562103
YAR027W	0.276512	0.287923	1.04127		YAR028W	0.443604	0.352759	0.795212
YAR028W	0.443604	0.567509	1.27931		YAR033W	0.512823	0.334177	0.651641
YAR033W	0.512823	0.767192	1.49602		YAR042W	0.237919	0.183013	0.769224
YAR042W	0.237919	0.403263	1.69496		YBL001C	0.588882	0.610871	1.03734
YBL001C	0.588882	0.427098	0.725269		YBL002W	0.629191	0.721024	1.14595
YBL002W	0.629191	0.609299	0.968385		YBL003C	1.75357	1.5935	0.908715
YBL003C	1.75357	1.45393	0.829126		YBL004W	0.563618	0.54482	0.966649
YBL004W	0.563618	1.00609	1.78506		YBL005W	0.334705	0.1611	0.481318
YBL005W	0.334705	0.31882	0.95254		YBL006C	0.579359	0.598603	1.03322
YBL006C	0.579359	0.929124	1.60371		YBL007C	0.708448	0.898953	1.2689
YBL007C	0.708448	0.914224	1.29046		YBL008W	0.449699	0.375465	0.834925
YBL008W	0.449699	0.590094	1.3122		YBL009W	0.171829	0.0957712	0.557365
YBL009W	0.171829	0.167432	0.974414		YBL010C	0.224724	0.17573	0.781981
YBL010C	0.224724	0.476695	2.12125		YBL011W	0.471081	0.332781	0.706419
YBL011W	0.471081	0.556217	1.18072		YBL013W	0.177675	0.0856699	0.482172
YBL013W	0.177675	0.126278	0.710727		YBL014C	0.383493	0.214057	0.558176
YBL014C	0.383493	0.490512	1.27906		YBL015W	0.358643	0.300977	0.839212
YBL015W	0.358643	0.499515	1.39279		YBL016W	0.219189	0.150915	0.688517
YBL016W	0.219189	0.347623	1.58595		YBL017C	0.391506	0.320577	0.81883
YBL017C	0.391506	0.591142	1.50992		YBL018C	0.71375	0.861106	1.20645
YBL018C	0.71375	0.867682	1.21567		YBL019W	0.151396	0.0777272	0.513403
YBL019W	0.151396	0.146472	0.967476		YBL020W	0.502918	0.51872	1.03142
YBL020W	0.502918	0.658694	1.30974		YBL021C	0.34865	0.198973	0.570694
YBL021C	0.34865	0.413721	1.18664		YBL022C	0.35966	0.46468	1.292
YBL022C	0.35966	0.521722	1.4506		YBL023C	0.266222	0.214489	0.805674
YBL023C	0.266222	0.307687	1.15575		YBL024W	0.590732	0.691063	1.16984
YBL024W	0.590732	0.686393	1.16194		YBL025W	0.26481	0.222731	0.841095
YBL025W	0.26481	0.407196	1.53769		YBL026W	0.308334	0.227358	0.737377
YBL026W	0.308334	0.20139	0.653155		YBL027W	2.60318	4.59291	1.76434
YBL027W	2.60318	2.48652	0.955186		YBL028C	0.573392	0.653821	1.14027
YBL028C	0.573392	0.68485	1.19438		YBL029C-A	0.415305	0.434764	1.04685
YBL029C-A	0.415305	0.508705	1.22489		YBL029W	0.306363	0.155833	0.508655
YBL029W	0.306363	0.254073	0.82932		YBL030C	2.00944	3.24546	1.6151
YBL030C	2.00944	2.22811	1.10882		YBL031W	0.10038	0.046749	0.465719
YBL031W	0.10038	0.13368	1.33174		YBL032W	0.2039	0.238221	1.16832
YBL032W	0.2039	0.271871	1.33335		YBL033C	0.289311	0.171438	0.592573
YBL033C	0.289311	0.40504	1.40002		YBL034C	0.540105	0.417724	0.773412
YBL034C	0.540105	1.06747	1.97641		YBL035C	0.263301	0.183857	0.698276
YBL035C	0.263301	0.344966	1.31016		YBL036C	0.281037	0.273425	0.972912
YBL036C	0.281037	0.228399	0.812699		YBL037W	0.391207	0.291545	0.745246
YBL037W	0.391207	0.559853	1.43109		YBL038W	0.274428	0.214744	0.782514
YBL038W	0.274428	0.411023	1.49774		YBL039C	0.492264	0.870282	1.76792
YBL039C	0.492264	0.637933	1.29592		YBL039W-B	0.417883	0.326029	0.780194
YBL039W-B	0.417883	0.422564	1.0112		YBL040C	0.991057	1.12855	1.13873
YBL040C	0.991057	1.87471	1.89163		YBL041W	0.877636	0.884142	1.00741
YBL041W	0.877636	1.23126	1.40292		YBL042C	0.777492	0.674002	0.866892
YBL042C	0.777492	0.960405	1.23526		YBL043W	0.119216	0.0867542	0.727705
YBL043W	0.119216	0.21044	1.76519		YBL045C	0.844598	0.988038	1.16983
YBL045C	0.844598	1.10158	1.30426		YBL046W	0.256314	0.178531	0.696535
YBL046W	0.256314	0.368885	1.4392		YBL047C	0.435975	0.477104	1.09434
YBL047C	0.435975	0.463743	1.06369		YBL049W	0.166153	0.214022	1.2881
YBL049W	0.166153	0.399497	2.40439		YBL050W	0.712184	0.880572	1.23644
YBL050W	0.712184	0.878324	1.23328		YBL051C	0.453609	0.478496	1.05486
YBL051C	0.453609	0.719224	1.58556		YBL052C	0.396988	0.311558	0.784803
YBL052C	0.396988	0.523145	1.31778		YBL054W	0.159856	0.117893	0.737497
YBL054W	0.159856	0.204742	1.28079		YBL055C	0.274472	0.206035	0.750661
YBL055C	0.274472	0.355124	1.29385		YBL056W	0.493536	0.458882	0.929784
YBL056W	0.493536	0.440085	0.891698		YBL057C	0.435589	0.42671	0.979617
YBL057C	0.435589	0.45736	1.04998		YBL058W	0.429553	0.505852	1.17762
YBL058W	0.429553	0.570331	1.32773		YBL059C-A	0.471123	0.672513	1.42747
YBL059C-A	0.471123	0.703052	1.49229		YBL060W	0.295121	0.163043	0.552462
YBL060W	0.295121	0.442754	1.50025		YBL061C	0.271758	0.226877	0.834852
YBL061C	0.271758	0.387326	1.42526		YBL063W	0.337166	0.319007	0.946141
YBL063W	0.337166	0.54275	1.60974		YBL064C	1.46147	1.72278	1.1788
YBL064C	1.46147	1.89094	1.29386		YBL066C	0.470665	0.251476	0.534299
YBL066C	0.470665	0.863783	1.83524		YBL067C	0.404415	0.568048	1.40462
YBL067C	0.404415	0.488226	1.20724		YBL068W	0.870273	0.930064	1.0687
YBL068W	0.870273	1.0951	1.25834		YBL069W	0.624979	0.38363	0.613828
YBL069W	0.624979	0.718497	1.14963		YBL071W-A	0.46446	0.449596	0.967997
YBL071W-A	0.46446	0.740682	1.59472		YBL072C	1.44465	2.63164	1.82165
YBL072C	1.44465	1.45172	1.00489		YBL074C	0.241971	0.139677	0.577246
YBL074C	0.241971	0.438178	1.81087		YBL076C	0.598821	0.901961	1.50623
YBL076C	0.598821	0.709879	1.18546		YBL078C	0.30177	0.244219	0.80929
YBL078C	0.30177	0.430531	1.42669		YBL079W	0.652547	0.604611	0.92654
YBL079W	0.652547	0.808368	1.23879		YBL080C	0.334233	0.245419	0.734276
YBL080C	0.334233	0.542037	1.62174		YBL081W	0.299983	0.208543	0.695181
YBL081W	0.299983	0.34145	1.13823		YBL082C	0.523117	0.631213	1.20664
YBL082C	0.523117	0.925303	1.76883		YBL084C	0.38956	0.143334	0.367937
YBL084C	0.38956	0.548093	1.40695		YBL085W	0.413035	0.327438	0.792759
YBL085W	0.413035	0.8296	2.00854		YBL086C	0.166746	0.0325328	0.195104
YBL086C	0.166746	0.0981667	0.588719		YBL087C	0.711737	0.877276	1.23259
YBL087C	0.711737	0.466556	0.655517		YBL088C	0.381441	0.291772	0.764921
YBL088C	0.381441	0.726759	1.9053		YBL089W	0.406456	0.306697	0.754563
YBL089W	0.406456	0.578011	1.42208		YBL090W	1.08631	1.24055	1.14199
YBL090W	1.08631	1.609	1.48117		YBL091C	0.281106	0.465301	1.65525
YBL091C	0.281106	0.417154	1.48398		YBL091C-A	0.722471	1.03168	1.42799
YBL091C-A	0.722471	1.15255	1.59529		YBL092W	3.18362	4.57889	1.43827
YBL092W	3.18362	2.42709	0.762369		YBL093C	0.445071	0.36702	0.824633
YBL093C	0.445071	0.525938	1.1817		YBL095W	0.262037	0.145956	0.557008
YBL095W	0.262037	0.510126	1.94677		YBL097W	0.135838	0.0951178	0.700228
YBL097W	0.135838	0.38673	2.84699		YBL098W	0.682776	0.467954	0.68537
YBL098W	0.682776	0.55401	0.811409		YBL099W	0.99576	0.942663	0.946678
YBL099W	0.99576	1.04369	1.04813		YBL101C	0.315003	0.25604	0.812819
YBL101C	0.315003	0.411631	1.30675		YBL102W	0.080328	0.0896572	1.11614
YBL102W	0.080328	0.151413	1.88493		YBL103C	0.284119	0.149861	0.527458
YBL103C	0.284119	0.554569	1.95189		YBL104C	0.22625	0.138816	0.613551
YBL104C	0.22625	0.340567	1.50527		YBL105C	0.594837	0.62264	1.04674
YBL105C	0.594837	1.09513	1.84107		YBL107C	0.754199	0.769322	1.02005
YBL107C	0.754199	1.06344	1.41003		YBR001C	0.417395	0.257894	0.617864
YBR001C	0.417395	0.563282	1.34952		YBR002C	0.238384	0.225754	0.947016
YBR002C	0.238384	0.393695	1.65151		YBR003W	0.637665	0.888621	1.39355
YBR003W	0.637665	0.788844	1.23708		YBR004C	0.469699	0.451741	0.961767
YBR004C	0.469699	0.521572	1.11044		YBR005W	0.548846	0.470002	0.856347
YBR005W	0.548846	1.03951	1.89399		YBR006W	0.410412	0.243808	0.594057
YBR006W	0.410412	0.371684	0.905638		YBR007C	0.146796	0.116187	0.791487
YBR007C	0.146796	0.341761	2.32814		YBR008C	0.389	0.376567	0.96804
YBR008C	0.389	0.838446	2.15539		YBR009C	0.622198	0.669113	1.0754
YBR009C	0.622198	0.857121	1.37757		YBR010W	0.848976	0.548812	0.64644
YBR010W	0.848976	0.724233	0.853067		YBR011C	0.8837	1.71109	1.93628
YBR011C	0.8837	0.902342	1.0211		YBR014C	0.352863	0.394152	1.11701
YBR014C	0.352863	0.620475	1.7584		YBR015C	0.721414	1.06603	1.4777
YBR015C	0.721414	0.898384	1.24531		YBR016W	0.279518	0.308975	1.10539
YBR016W	0.279518	0.370322	1.32486		YBR017C	0.40885	0.371778	0.909326
YBR017C	0.40885	0.494195	1.20874		YBR021W	0.193315	0.123769	0.640249
YBR021W	0.193315	0.372616	1.92751		YBR022W	0.482399	0.58085	1.20409
YBR022W	0.482399	0.67882	1.40717		YBR023C	0.840088	0.925663	1.10186
YBR023C	0.840088	1.44314	1.71784		YBR024W	0.276955	0.229116	0.827267
YBR024W	0.276955	0.278117	1.0042		YBR025C	0.730615	1.13934	1.55942
YBR025C	0.730615	0.746519	1.02177		YBR026C	0.45788	0.613348	1.33954
YBR026C	0.45788	0.755713	1.65046		YBR028C	0.450276	0.377137	0.837568
YBR028C	0.450276	0.664408	1.47556		YBR029C	0.293652	0.181091	0.616686
YBR029C	0.293652	0.31071	1.05809		YBR030W	0.472306	0.362959	0.768484
YBR030W	0.472306	0.71947	1.52331		YBR031W	2.09991	3.40783	1.62284
YBR031W	2.09991	1.9261	0.917229		YBR034C	0.498146	0.542231	1.0885
YBR034C	0.498146	0.623032	1.2507		YBR035C	0.548921	0.830771	1.51346
YBR035C	0.548921	0.572842	1.04358		YBR036C	0.348881	0.428243	1.22747
YBR036C	0.348881	0.696057	1.99511		YBR037C	0.370758	0.331944	0.895311
YBR037C	0.370758	0.559228	1.50834		YBR038W	0.650455	0.665858	1.02368
YBR038W	0.650455	1.11473	1.71378		YBR039W	0.748002	1.02836	1.37481
YBR039W	0.748002	0.758184	1.01361		YBR041W	0.596723	0.423559	0.709809
YBR041W	0.596723	0.456726	0.765389		YBR042C	0.615914	0.493131	0.800649
YBR042C	0.615914	0.60276	0.978643		YBR043C	0.511238	0.400278	0.782957
YBR043C	0.511238	1.18642	2.32067		YBR044C	0.198227	0.138735	0.699881
YBR044C	0.198227	0.293042	1.47831		YBR046C	0.473579	0.433438	0.915238
YBR046C	0.473579	0.612544	1.29343		YBR047W	0.638211	0.304239	0.476706
YBR047W	0.638211	0.693932	1.08731		YBR048W	3.33252	4.37648	1.31327
YBR048W	3.33252	2.85393	0.856389		YBR049C	0.24383	0.28687	1.17652
YBR049C	0.24383	0.432737	1.77475		YBR051W	2.25132	0.711723	0.316136
YBR051W	2.25132	1.15429	0.512718		YBR052C	0.487519	0.687112	1.4094
YBR052C	0.487519	0.673128	1.38072		YBR053C	0.446916	0.709439	1.58741
YBR053C	0.446916	0.818555	1.83156		YBR054W	1.00148	0.946143	0.944745
YBR054W	1.00148	0.711333	0.710282		YBR055C	0.294885	0.319505	1.08349
YBR055C	0.294885	0.609045	2.06537		YBR056W	0.443903	0.403585	0.909175
YBR056W	0.443903	0.43152	0.972106		YBR056W-A	0.39705	0.305974	0.770617
YBR056W-A	0.39705	0.459653	1.15767		YBR057C	0.413605	0.288333	0.69712
YBR057C	0.413605	0.664765	1.60725		YBR058C	0.44815	0.411006	0.917116
YBR058C	0.44815	0.618889	1.38098		YBR058C-A	1.30866	1.4949	1.14232
YBR058C-A	1.30866	1.91089	1.46019		YBR059C	0.521928	0.517206	0.990953
YBR059C	0.521928	0.965449	1.84978		YBR060C	0.20755	0.150881	0.726964
YBR060C	0.20755	0.419619	2.02178		YBR061C	0.349829	0.223737	0.63956
YBR061C	0.349829	0.451511	1.29066		YBR062C	0.294668	0.209766	0.711873
YBR062C	0.294668	0.406187	1.37846		YBR065C	0.5468	0.489088	0.894456
YBR065C	0.5468	0.931552	1.70364		YBR066C	0.201578	0.0797718	0.395738
YBR066C	0.201578	0.488063	2.42122		YBR067C	0.598951	1.13984	1.90306
YBR067C	0.598951	1.05402	1.75977		YBR068C	0.407065	0.307167	0.75459
YBR068C	0.407065	0.482899	1.1863		YBR069C	0.755443	0.719621	0.95258
YBR069C	0.755443	1.23104	1.62956		YBR070C	0.840596	0.821364	0.977121
YBR070C	0.840596	1.31879	1.56887		YBR071W	0.262289	0.194511	0.74159
YBR071W	0.262289	0.611088	2.32983		YBR072W	0.302201	0.683257	2.26093
YBR072W	0.302201	0.577581	1.91125		YBR073W	0.501626	0.497786	0.992345
YBR073W	0.501626	0.886127	1.76651		YBR074W	0.668063	0.535762	0.801964
YBR074W	0.668063	0.730584	1.09359		YBR076C-A	0.0273017	0.00736811	0.269877
YBR076C-A	0.0273017	0.0192954	0.706746		YBR077C	0.49735	0.399978	0.804219
YBR077C	0.49735	0.759925	1.52795		YBR078W	0.852715	1.31811	1.54578
YBR078W	0.852715	0.842936	0.988533		YBR079C	0.173261	0.245168	1.41502
YBR079C	0.173261	0.1734	1.0008		YBR080C	0.672916	0.612676	0.910479
YBR080C	0.672916	0.794909	1.18129		YBR081C	0.268597	0.31691	1.17987
YBR081C	0.268597	0.749052	2.78876		YBR082C	0.42749	0.591709	1.38415
YBR082C	0.42749	0.520011	1.21643		YBR083W	0.179158	0.135502	0.756327
YBR083W	0.179158	0.368821	2.05864		YBR084C-A	1.81374	3.48653	1.92229
YBR084C-A	1.81374	1.47481	0.81313		YBR084W	0.538338	0.846217	1.57191
YBR084W	0.538338	0.564201	1.04804		YBR085C-A	0.594252	0.980661	1.65024
YBR085C-A	0.594252	1.35025	2.27218		YBR085W	0.780576	0.685043	0.877612
YBR085W	0.780576	0.732277	0.938124		YBR086C	0.437052	0.398931	0.912777
YBR086C	0.437052	0.35313	0.807981		YBR087W	0.335663	0.396266	1.18055
YBR087W	0.335663	0.531972	1.58484		YBR088C	0.707025	0.660375	0.93402
YBR088C	0.707025	1.05194	1.48784		YBR089C-A	0.349924	0.342098	0.977637
YBR089C-A	0.349924	0.499937	1.4287		YBR091C	0.832335	0.666706	0.801006
YBR091C	0.832335	1.00649	1.20924		YBR092C	0.327363	0.313513	0.957691
YBR092C	0.327363	0.376953	1.15148		YBR093C	0.265301	0.246481	0.92906
YBR093C	0.265301	0.199273	0.751119		YBR094W	0.256873	0.16597	0.646119
YBR094W	0.256873	0.199592	0.777007		YBR095C	0.291432	0.200694	0.688648
YBR095C	0.291432	0.596922	2.04824		YBR096W	0.428695	0.400341	0.933859
YBR096W	0.428695	0.572386	1.33518		YBR097W	0.598251	0.362518	0.605964
YBR097W	0.598251	0.9276	1.55052		YBR098W	0.261688	0.223909	0.855635
YBR098W	0.261688	0.797795	3.04866		YBR101C	0.142458	0.0736206	0.516789
YBR101C	0.142458	0.143993	1.01078		YBR102C	0.33819	0.265315	0.784515
YBR102C	0.33819	0.585614	1.73162		YBR103W	0.202743	0.0990077	0.488342
YBR103W	0.202743	0.181701	0.896216		YBR104W	0.600293	0.525192	0.874892
YBR104W	0.600293	0.677624	1.12882		YBR105C	0.209413	0.205959	0.983508
YBR105C	0.209413	0.326049	1.55697		YBR106W	0.778474	1.05935	1.36081
YBR106W	0.778474	0.876805	1.12631		YBR107C	0.264635	0.300384	1.13509
YBR107C	0.264635	0.591473	2.23505		YBR108W	0.17092	0.147393	0.862349
YBR108W	0.17092	0.510264	2.98539		YBR109C	1.54787	3.03045	1.95782
YBR109C	1.54787	2.53638	1.63863		YBR110W	0.691446	0.687747	0.99465
YBR110W	0.691446	1.22893	1.77733		YBR111C	0.961401	1.34206	1.39594
YBR111C	0.961401	1.19504	1.24302		YBR111W-A	0.529848	0.478708	0.903483
YBR111W-A	0.529848	0.500515	0.94464		YBR112C	0.13164	0.10568	0.802794
YBR112C	0.13164	0.21737	1.65125		YBR114W	0.359583	0.204829	0.569629
YBR114W	0.359583	0.474552	1.31973		YBR115C	0.485745	0.474408	0.97666
YBR115C	0.485745	0.576963	1.18779		YBR117C	0.239995	0.52108	2.17121
YBR117C	0.239995	0.867218	3.61349		YBR118W	3.68261	8.56659	2.32623
YBR118W	3.68261	3.6771	0.998505		YBR119W	0.1784	0.111086	0.62268
YBR119W	0.1784	0.27904	1.56412		YBR120C	0.648437	0.494445	0.762519
YBR120C	0.648437	0.877729	1.35361		YBR121C	1.12882	1.70004	1.50604
YBR121C	1.12882	1.46811	1.30057		YBR122C	0.337191	0.464358	1.37714
YBR122C	0.337191	0.545423	1.61755		YBR123C	0.195164	0.101146	0.518261
YBR123C	0.195164	0.210386	1.078		YBR125C	0.40762	0.302481	0.742068
YBR125C	0.40762	0.389651	0.955917		YBR126C	0.409796	0.324088	0.790854
YBR126C	0.409796	0.400369	0.976996		YBR126W-A	0.547303	0.469573	0.857975
YBR126W-A	0.547303	0.336665	0.615135		YBR127C	0.920014	1.44605	1.57177
YBR127C	0.920014	0.896806	0.974774		YBR128C	0.138618	0.0860722	0.62093
YBR128C	0.138618	0.171573	1.23774		YBR129C	0.184282	0.151602	0.822662
YBR129C	0.184282	0.223701	1.21391		YBR130C	0.34311	0.335419	0.977583
YBR130C	0.34311	0.528717	1.54095		YBR131W	0.262235	0.0726597	0.277079
YBR131W	0.262235	0.23036	0.878451		YBR132C	0.230613	0.141924	0.615419
YBR132C	0.230613	0.374619	1.62445		YBR133C	0.361547	0.26744	0.73971
YBR133C	0.361547	0.376002	1.03998		YBR135W	0.266725	0.296451	1.11145
YBR135W	0.266725	0.471743	1.76865		YBR136W	0.415927	0.325858	0.783449
YBR136W	0.415927	0.498301	1.19805		YBR137W	0.629246	0.788853	1.25365
YBR137W	0.629246	0.867089	1.37798		YBR138C	0.228507	0.139568	0.610782
YBR138C	0.228507	0.527738	2.30951		YBR139W	0.641304	0.746603	1.1642
YBR139W	0.641304	0.786908	1.22704		YBR140C	0.453395	0.411957	0.908605
YBR140C	0.453395	0.831636	1.83424		YBR141C	0.286436	0.178437	0.622957
YBR141C	0.286436	0.350117	1.22232		YBR141W-A	0.371088	0.2163	0.582879
YBR141W-A	0.371088	0.479151	1.29121		YBR142W	0.241862	0.29934	1.23765
YBR142W	0.241862	0.375864	1.55404		YBR143C	0.443219	0.542972	1.22507
YBR143C	0.443219	0.477337	1.07698		YBR145W	0.338826	0.288021	0.850057
YBR145W	0.338826	0.668288	1.97236		YBR146W	0.436342	0.564061	1.2927
YBR146W	0.436342	0.590577	1.35347		YBR149W	0.462204	0.822671	1.77989
YBR149W	0.462204	0.73478	1.58973		YBR150C	0.298259	0.118419	0.397033
YBR150C	0.298259	0.715425	2.39867		YBR151W	0.314068	0.280745	0.893899
YBR151W	0.314068	0.312664	0.995529		YBR152W	0.0446	0.0236608	0.530511
YBR152W	0.0446	0.105773	2.37158		YBR153W	0.249171	0.18287	0.733915
YBR153W	0.249171	0.484553	1.94466		YBR154C	0.6987	0.546513	0.782186
YBR154C	0.6987	0.692107	0.990563		YBR155W	0.419588	0.37249	0.887752
YBR155W	0.419588	0.421195	1.00383		YBR156C	0.116464	0.0716767	0.615443
YBR156C	0.116464	0.284396	2.44193		YBR157C	0.428283	0.239658	0.55958
YBR157C	0.428283	0.669559	1.56336		YBR158W	0.266434	0.188394	0.707095
YBR158W	0.266434	0.2833	1.0633		YBR159W	1.05851	1.34555	1.27118
YBR159W	1.05851	1.18884	1.12313		YBR160W	0.279354	0.196781	0.704413
YBR160W	0.279354	0.316113	1.13159		YBR161W	0.305767	0.139083	0.454867
YBR161W	0.305767	0.537318	1.75728		YBR162C	0.658937	0.772893	1.17294
YBR162C	0.658937	0.521647	0.791649		YBR162W-A	0.780303	0.748489	0.959229
YBR162W-A	0.780303	0.863299	1.10636		YBR163W	0.604567	0.413763	0.684396
YBR163W	0.604567	0.674819	1.1162		YBR164C	0.925176	1.23628	1.33626
YBR164C	0.925176	1.27584	1.37902		YBR165W	0.281698	0.138563	0.491885
YBR165W	0.281698	0.436971	1.5512		YBR166C	0.620283	0.494365	0.796999
YBR166C	0.620283	0.87991	1.41856		YBR167C	0.732526	0.524277	0.715711
YBR167C	0.732526	0.931606	1.27177		YBR168W	0.323072	0.216796	0.671044
YBR168W	0.323072	0.484916	1.50095		YBR169C	0.150719	0.0627608	0.416409
YBR169C	0.150719	0.128977	0.855744		YBR170C	0.563934	0.457775	0.811752
YBR170C	0.563934	0.928985	1.64733		YBR171W	0.282296	0.298186	1.05629
YBR171W	0.282296	0.329689	1.16788		YBR172C	0.174129	0.0980546	0.563114
YBR172C	0.174129	0.379808	2.18118		YBR173C	0.344754	0.387651	1.12443
YBR173C	0.344754	0.449732	1.3045		YBR175W	0.242013	0.214598	0.886721
YBR175W	0.242013	0.342829	1.41657		YBR176W	0.201746	0.139673	0.692325
YBR176W	0.201746	0.299475	1.48442		YBR177C	0.436492	0.433995	0.994281
YBR177C	0.436492	0.506394	1.16015		YBR179C	0.336713	0.247741	0.735764
YBR179C	0.336713	0.452788	1.34473		YBR181C	8.57282	17.1226	1.99731
YBR181C	8.57282	9.32495	1.08773		YBR182C	0.158862	0.120302	0.757272
YBR182C	0.158862	0.40065	2.522		YBR182C-A	0.310281	0.122326	0.394243
YBR182C-A	0.310281	0.222104	0.715817		YBR183W	0.560123	0.446214	0.796635
YBR183W	0.560123	0.676073	1.20701		YBR185C	0.308397	0.315687	1.02364
YBR185C	0.308397	0.30948	1.00351		YBR187W	0.602505	0.926277	1.53738
YBR187W	0.602505	0.93428	1.55066		YBR188C	0.421596	0.382972	0.908388
YBR188C	0.421596	0.634197	1.50428		YBR189W	1.68122	2.94475	1.75156
YBR189W	1.68122	1.57038	0.934076		YBR191W	2.18607	4.16993	1.9075
YBR191W	2.18607	2.19367	1.00348		YBR191W-A	0.00570861	0.0139616	2.4457
YBR192W	0.228012	0.259184	1.13671		YBR192W	0.228012	0.195223	0.856198
YBR193C	0.433554	0.758459	1.7494		YBR193C	0.433554	0.515885	1.1899
YBR194W	0.162313	0.317048	1.95331		YBR194W	0.162313	0.243001	1.49711
YBR195C	0.308195	0.462106	1.4994		YBR195C	0.308195	0.164046	0.532281
YBR196C	1.46302	1.71748	1.17392		YBR196C	1.46302	2.438	1.66641
YBR197C	0.392731	0.625039	1.59152		YBR197C	0.392731	0.450212	1.14636
YBR198C	0.553694	1.30154	2.35065		YBR198C	0.553694	0.404325	0.730231
YBR199W	0.47915	0.56253	1.17402		YBR199W	0.47915	0.412387	0.860664
YBR200W	0.306035	0.37087	1.21186		YBR200W	0.306035	0.221207	0.722817
YBR201C-A	0.030534	0.0330234	1.08153		YBR201C-A	0.030534	0.0138182	0.452553
YBR201W	0.181268	0.194848	1.07492		YBR201W	0.181268	0.182712	1.00797
YBR202W	0.205555	0.263073	1.27982		YBR202W	0.205555	0.192356	0.935788
YBR203W	0.0944103	0.189086	2.00281		YBR203W	0.0944103	0.120175	1.2729
YBR204C	0.256848	0.273752	1.06582		YBR204C	0.256848	0.16119	0.627569
YBR205W	0.678648	0.759703	1.11944		YBR205W	0.678648	0.735224	1.08337
YBR207W	0.35865	0.529127	1.47533		YBR207W	0.35865	0.22741	0.634071
YBR208C	0.566727	2.02487	3.57292		YBR208C	0.566727	0.677968	1.19629
YBR210W	0.465079	0.658345	1.41555		YBR210W	0.465079	0.517936	1.11365
YBR211C	0.438673	0.510823	1.16447		YBR211C	0.438673	0.168768	0.384724
YBR212W	0.0880572	0.199409	2.26454		YBR212W	0.0880572	0.0816947	0.927745
YBR213W	0.147777	0.121567	0.822636		YBR213W	0.147777	0.129974	0.879524
YBR214W	0.406677	0.329605	0.810483		YBR214W	0.406677	0.25841	0.635417
YBR215W	0.229688	0.449504	1.95702		YBR215W	0.229688	0.217922	0.948773
YBR216C	0.0804246	0.155944	1.93901		YBR216C	0.0804246	0.0815396	1.01386
YBR217W	0.252447	0.463826	1.83732		YBR217W	0.252447	0.304049	1.2044
YBR218C	0.208837	0.221166	1.05904		YBR218C	0.208837	0.262856	1.25867
YBR220C	0.141976	0.257888	1.81643		YBR220C	0.141976	0.118818	0.836893
YBR221C	1.16734	2.04904	1.75531		YBR221C	1.16734	2.59321	2.22147
YBR222C	0.360855	0.414152	1.1477		YBR222C	0.360855	0.336026	0.931192
YBR223C	0.16988	0.305206	1.7966		YBR223C	0.16988	0.100245	0.590094
YBR225W	0.145156	0.351175	2.4193		YBR225W	0.145156	0.0760954	0.524233
YBR227C	0.245398	0.315009	1.28367		YBR227C	0.245398	0.182727	0.744614
YBR228W	0.163528	0.104405	0.638451		YBR228W	0.163528	0.0284532	0.173996
YBR229C	0.735982	1.01838	1.3837		YBR229C	0.735982	0.910789	1.23752
YBR230C	0.314262	0.472141	1.50238		YBR230C	0.314262	0.533232	1.69678
YBR230W-A	0.125159	0.214056	1.71028		YBR230W-A	0.125159	0.162346	1.29712
YBR231C	0.278669	0.836737	3.00262		YBR231C	0.278669	0.340147	1.22061
YBR233W	0.0484619	0.0861104	1.77687		YBR233W	0.0484619	0.0316072	0.652206
YBR233W-A	0.347965	0.427118	1.22747		YBR233W-A	0.347965	0.255341	0.73381
YBR234C	0.42671	0.600421	1.40709		YBR234C	0.42671	0.612056	1.43436
YBR235W	1.15011	1.78288	1.55019		YBR235W	1.15011	1.35454	1.17775
YBR236C	0.177017	0.277542	1.56789		YBR236C	0.177017	0.203213	1.14799
YBR237W	0.330364	0.690553	2.09028		YBR237W	0.330364	0.381069	1.15348
YBR238C	0.434924	0.52646	1.21046		YBR238C	0.434924	0.495272	1.13876
YBR239C	0.0882587	0.183582	2.08005		YBR239C	0.0882587	0.0642727	0.728231
YBR240C	0.230112	0.186054	0.808537		YBR240C	0.230112	0.0969158	0.421167
YBR241C	0.289566	0.397834	1.3739		YBR241C	0.289566	0.317596	1.0968
YBR242W	0.327444	0.419797	1.28204		YBR242W	0.327444	0.27057	0.82631
YBR243C	0.135323	0.124957	0.923398		YBR243C	0.135323	0.134369	0.992949
YBR244W	0.466634	0.489988	1.05005		YBR244W	0.466634	0.25612	0.548867
YBR246W	0.198461	0.264086	1.33067		YBR246W	0.198461	0.264051	1.33049
YBR247C	0.239005	0.404121	1.69085		YBR247C	0.239005	0.25219	1.05517
YBR248C	0.461858	0.54105	1.17146		YBR248C	0.461858	0.460423	0.996892
YBR249C	0.592222	0.909994	1.53658		YBR249C	0.592222	1.12186	1.89432
YBR251W	0.397115	0.566603	1.4268		YBR251W	0.397115	0.311294	0.783889
YBR252W	1.26554	1.7549	1.38668		YBR252W	1.26554	1.5933	1.25898
YBR253W	0.45788	0.494112	1.07913		YBR253W	0.45788	0.372598	0.813747
YBR254C	0.327459	0.477684	1.45876		YBR254C	0.327459	0.308684	0.942663
YBR255C-A	0.872222	1.16636	1.33723		YBR255C-A	0.872222	0.765227	0.877331
YBR255W	0.499166	0.960561	1.92433		YBR255W	0.499166	0.310336	0.621709
YBR256C	0.653934	1.08402	1.6577		YBR256C	0.653934	0.799879	1.22318
YBR257W	0.344579	0.401142	1.16415		YBR257W	0.344579	0.209417	0.607749
YBR258C	0.338701	0.420022	1.2401		YBR258C	0.338701	0.215553	0.636411
YBR259W	0.198879	0.211788	1.06491		YBR259W	0.198879	0.138692	0.697368
YBR260C	0.408186	0.571462	1.4		YBR260C	0.408186	0.357645	0.876181
YBR261C	0.265355	0.342975	1.29251		YBR261C	0.265355	0.389975	1.46964
YBR262C	0.438373	0.582777	1.32941		YBR262C	0.438373	0.288143	0.657302
YBR263W	0.355037	0.28708	0.808592		YBR263W	0.355037	0.462294	1.3021
YBR264C	0.573288	0.954234	1.66449		YBR264C	0.573288	0.645663	1.12624
YBR265W	0.273256	0.355991	1.30277		YBR265W	0.273256	0.222363	0.813754
YBR267W	0.145216	0.247978	1.70765		YBR267W	0.145216	0.154227	1.06206
YBR268W	0.398163	0.399034	1.00219		YBR268W	0.398163	0.383182	0.962374
YBR269C	0.613256	0.587284	0.957648		YBR269C	0.613256	0.527782	0.860622
YBR271W	0.306413	0.406707	1.32732		YBR271W	0.306413	0.346281	1.13011
YBR272C	0.871051	1.59759	1.8341		YBR272C	0.871051	0.73317	0.841707
YBR273C	0.495503	0.571817	1.15401		YBR273C	0.495503	0.477658	0.963986
YBR274W	0.289502	0.349759	1.20814		YBR274W	0.289502	0.237953	0.821937
YBR275C	0.362801	0.761454	2.09882		YBR275C	0.362801	0.273884	0.754916
YBR276C	0.366006	0.444012	1.21313		YBR276C	0.366006	0.427702	1.16857
YBR278W	0.260103	0.447571	1.72074		YBR278W	0.260103	0.23359	0.898067
YBR279W	0.277729	0.352662	1.2698		YBR279W	0.277729	0.188696	0.679426
YBR280C	0.153514	0.145999	0.951045		YBR280C	0.153514	0.0545785	0.355528
YBR281C	0.686625	1.01612	1.47988		YBR281C	0.686625	0.600229	0.874173
YBR282W	0.350889	0.383104	1.09181		YBR282W	0.350889	0.298274	0.850053
YBR283C	0.22592	0.220844	0.977535		YBR283C	0.22592	0.246164	1.08961
YBR284W	0.511853	1.27947	2.49969		YBR284W	0.511853	0.249976	0.488375
YBR286W	0.114384	0.066691	0.583045		YBR286W	0.114384	0.125472	1.09694
YBR287W	0.958529	0.920128	0.959937		YBR287W	0.958529	1.06605	1.11217
YBR288C	0.663579	0.732574	1.10397		YBR288C	0.663579	0.496172	0.747721
YBR289W	0.0711167	0.103506	1.45544		YBR289W	0.0711167	0.0584739	0.822224
YBR290W	0.590242	0.882724	1.49553		YBR290W	0.590242	0.474986	0.804731
YBR291C	0.739339	1.36311	1.84369		YBR291C	0.739339	0.462276	0.625255
YBR292C	0.65265	1.23532	1.89278		YBR292C	0.65265	0.736651	1.12871
YBR293W	0.0964906	0.215753	2.23601		YBR293W	0.0964906	0.0779847	0.808211
YBR295W	0.347359	0.484558	1.39498		YBR295W	0.347359	0.188039	0.541339
YBR297W	0.493526	0.993751	2.01357		YBR296C	0.264363	0.0845431	0.319799
YBR298C	0.371802	0.750343	2.01813		YBR297W	0.493526	0.441731	0.895052
YCL001W	1.22324	1.80238	1.47345		YBR298C	0.371802	0.198206	0.533097
YCL002C	0.556736	0.939368	1.68728		YCL001W	1.22324	1.13594	0.928636
YCL004W	0.26355	0.403142	1.52966		YCL002C	0.556736	0.655192	1.17685
YCL005W	0.282237	0.691358	2.44956		YCL004W	0.26355	0.19103	0.724834
YCL005W-A	1.00317	0.838107	0.835457		YCL005W	0.282237	0.289336	1.02515
YCL007C	2.17933	0.408702	0.187536		YCL005W-A	1.00317	0.977696	0.974604
YCL008C	0.450412	0.845692	1.8776		YCL007C	2.17933	0.433769	0.199038
YCL009C	0.836302	1.09605	1.31059		YCL008C	0.450412	0.430953	0.956797
YCL010C	0.313261	0.732399	2.33798		YCL009C	0.836302	1.59564	1.90797
YCL011C	0.3135	0.397005	1.26636		YCL010C	0.313261	0.34845	1.11233
YCL012C	0.709153	1.2879	1.81611		YCL011C	0.3135	0.256705	0.818836
YCL014W	0.213085	0.500339	2.34807		YCL012C	0.709153	0.754028	1.06328
YCL016C	0.154345	0.386683	2.50532		YCL014W	0.213085	0.228329	1.07154
YCL017C	0.589532	1.0254	1.73934		YCL016C	0.154345	0.122415	0.793123
YCL018W	0.223568	0.283081	1.2662		YCL017C	0.589532	0.917651	1.55658
YCL024W	0.352611	0.697659	1.97855		YCL018W	0.223568	0.126947	0.567823
YCL025C	0.300126	0.483517	1.61104		YCL024W	0.352611	0.217879	0.617904
YCL026C-A	0.640601	0.835584	1.30438		YCL025C	0.300126	0.244553	0.814834
YCL026C-B	0.240841	0.243879	1.01262		YCL026C-A	0.640601	0.134362	0.209743
YCL027W	0.180807	0.24962	1.38059		YCL026C-B	0.240841	0.310547	1.28943
YCL028W	0.335779	0.440373	1.3115		YCL028W	0.335779	0.489161	1.45679
YCL029C	0.258358	0.481356	1.86313		YCL029C	0.258358	0.277447	1.07388
YCL030C	0.300627	0.33486	1.11387		YCL030C	0.300627	0.237618	0.790407
YCL031C	0.821589	1.29452	1.57562		YCL031C	0.821589	0.688308	0.837777
YCL032W	0.51241	0.785463	1.53288		YCL032W	0.51241	0.305941	0.597063
YCL033C	0.809427	0.991418	1.22484		YCL033C	0.809427	1.10442	1.36445
YCL034W	0.349142	0.538571	1.54256		YCL034W	0.349142	0.234769	0.672416
YCL035C	0.781366	1.59506	2.04137		YCL035C	0.781366	1.31183	1.67889
YCL036W	0.28487	0.500773	1.7579		YCL036W	0.28487	0.14788	0.519113
YCL037C	0.269454	0.638955	2.37129		YCL037C	0.269454	0.387487	1.43804
YCL038C	0.387761	0.73553	1.89686		YCL038C	0.387761	0.432436	1.11521
YCL039W	0.422436	0.690815	1.63531		YCL039W	0.422436	0.191859	0.454172
YCL040W	0.318119	0.433198	1.36175		YCL040W	0.318119	0.338361	1.06363
YCL042W	0.0290242	0.0420075	1.44733		YCL042W	0.0290242	0.0476684	1.64237
YCL043C	1.24961	1.62834	1.30308		YCL043C	1.24961	1.56672	1.25377
YCL044C	0.231662	0.411523	1.7764		YCL044C	0.231662	0.211272	0.911985
YCL045C	0.300385	0.370547	1.23358		YCL045C	0.300385	0.284211	0.946159
YCL047C	0.356463	0.557843	1.56494		YCL047C	0.356463	0.259244	0.727268
YCL049C	0.448646	0.848655	1.89159		YCL049C	0.448646	0.540568	1.20489
YCL050C	0.806069	1.69901	2.10777		YCL050C	0.806069	1.31025	1.62549
YCL051W	0.413739	0.580822	1.40384		YCL051W	0.413739	0.262491	0.634437
YCL052C	0.334114	0.45459	1.36059		YCL052C	0.334114	0.266021	0.796199
YCL054W	0.496475	0.703804	1.4176		YCL054W	0.496475	0.420173	0.846314
YCL055W	0.391031	0.433872	1.10956		YCL054W-A	#N/A	#N/A	#N/A
YCL056C	0.355579	0.946804	2.66271		YCL055W	0.391031	0.207274	0.530071
YCL057C-A	0.642548	0.790459	1.2302		YCL056C	0.355579	0.357475	1.00533
YCL057W	0.727097	1.14399	1.57337		YCL057C-A	0.642548	0.75534	1.17554
YCL058W-A	1.5667	2.75187	1.75647		YCL057W	0.727097	0.838005	1.15253
YCL059C	0.306266	0.415258	1.35587		YCL058W-A	1.5667	1.39936	0.893186
YCL061C	0.1723	0.317694	1.84384		YCL059C	0.306266	0.338938	1.10668
YCL063W	0.24846	0.358809	1.44413		YCL061C	0.1723	0.0910127	0.528223
YCL064C	0.618028	0.468721	0.758415		YCL063W	0.24846	0.155689	0.626615
YCR002C	0.262036	0.421136	1.60717		YCL064C	0.618028	0.874514	1.41501
YCR003W	0.616257	0.948098	1.53848		YCR002C	0.262036	0.338289	1.291
YCR004C	0.367073	0.656664	1.78892		YCR003W	0.616257	0.576465	0.935429
YCR005C	0.254919	0.35689	1.40001		YCR004C	0.367073	0.639019	1.74085
YCR006C	0.162972	0.471635	2.89397		YCR005C	0.254919	0.0993418	0.389699
YCR007C	0.175821	0.44904	2.55397		YCR006C	0.162972	0.0884223	0.542563
YCR008W	0.355952	0.576631	1.61997		YCR007C	0.175821	0.098102	0.557966
YCR009C	0.438909	0.822039	1.87291		YCR008W	0.355952	0.448168	1.25907
YCR011C	0.244926	0.344574	1.40685		YCR009C	0.438909	0.577046	1.31473
YCR012W	10.2954	14.9302	1.45018		YCR011C	0.244926	0.16577	0.676816
YCR015C	2.26881	1.38815	0.611841		YCR012W	10.2954	19.0117	1.84661
YCR016W	0.341248	0.466622	1.3674		YCR015C	2.26881	0.672963	0.296614
YCR017C	0.890876	1.30504	1.4649		YCR016W	0.341248	0.321195	0.941238
YCR018C-A	0.267812	0.372569	1.39116		YCR017C	0.890876	0.805444	0.904103
YCR019W	0.389526	0.651712	1.67309		YCR018C-A	0.267812	0.198727	0.742042
YCR020C-A	0.430331	0.645916	1.50098		YCR019W	0.389526	0.269172	0.691024
YCR020W-B	0.610809	1.16522	1.90767		YCR020C-A	0.430331	0.695297	1.61573
YCR021C	0.354507	0.159147	0.448926		YCR020W-B	0.610809	1.03517	1.69474
YCR023C	0.850161	1.54637	1.81891		YCR021C	0.354507	0.132402	0.373482
YCR024C	0.205152	0.356854	1.73946		YCR023C	0.850161	0.805252	0.947177
YCR024C-A	0.089002	0.123314	1.38552		YCR024C	0.205152	0.122805	0.598605
YCR026C	0.189642	0.263541	1.38967		YCR024C-A	0.089002	0.125463	1.40967
YCR027C	0.282384	0.46403	1.64326		YCR026C	0.189642	0.134611	0.709813
YCR028C	0.438484	0.667143	1.52148		YCR027C	0.282384	0.224584	0.795315
YCR028C-A	1.1036	1.93843	1.75645		YCR028C	0.438484	0.576028	1.31368
YCR030C	0.566697	1.27791	2.25502		YCR028C-A	1.1036	1.70038	1.54075
YCR031C	1.81442	2.57978	1.42182		YCR030C	0.566697	0.608038	1.07295
YCR032W	0.348506	0.869908	2.49611		YCR031C	1.81442	3.06203	1.68761
YCR033W	0.403935	0.99834	2.47154		YCR032W	0.348506	0.292756	0.840031
YCR034W	0.942232	1.08293	1.14932		YCR033W	0.403935	0.226004	0.559507
YCR035C	0.579453	0.925765	1.59765		YCR034W	0.942232	0.930272	0.987308
YCR036W	0.273147	0.495211	1.81298		YCR035C	0.579453	0.492186	0.849398
YCR037C	0.367811	0.958209	2.60517		YCR036W	0.273147	0.332803	1.2184
YCR042C	0.701289	1.5212	2.16914		YCR037C	0.367811	0.467561	1.2712
YCR043C	1.15314	1.97659	1.71409		YCR042C	0.701289	0.624114	0.889953
YCR044C	1.64932	2.71342	1.64518		YCR043C	1.15314	1.70985	1.48277
YCR046C	0.604015	0.956095	1.5829		YCR044C	1.64932	2.24601	1.36178
YCR047C	0.463245	0.717023	1.54783		YCR046C	0.604015	1.09427	1.81166
YCR048W	0.45202	0.800896	1.77181		YCR047C	0.463245	0.330086	0.712551
YCR051W	0.681957	1.39324	2.04301		YCR048W	0.45202	0.544076	1.20365
YCR052W	0.253165	0.304498	1.20276		YCR051W	0.681957	0.9443	1.38469
YCR053W	0.811763	1.39583	1.71951		YCR052W	0.253165	0.22361	0.883257
YCR054C	0.514116	0.820749	1.59643		YCR053W	0.811763	1.21315	1.49447
YCR057C	0.520089	0.704478	1.35453		YCR054C	0.514116	0.293799	0.571463
YCR059C	0.637367	0.949869	1.4903		YCR057C	0.520089	0.438812	0.843725
YCR060W	0.701741	0.762099	1.08601		YCR059C	0.637367	0.759451	1.19155
YCR061W	0.38755	0.501505	1.29404		YCR060W	0.701741	0.472007	0.672622
YCR063W	0.0953095	0.249664	2.61951		YCR061W	0.38755	0.353915	0.913211
YCR064C	0.659849	0.435679	0.66027		YCR063W	0.0953095	0.115255	1.20928
YCR065W	0.0564883	0.148795	2.63409		YCR065W	0.0564883	0.0424443	0.751383
YCR066W	0.235898	0.531495	2.25307		YCR066W	0.235898	0.103189	0.43743
YCR067C	0.368822	0.603715	1.63687		YCR067C	0.368822	0.387127	1.04963
YCR068W	0.400506	0.951823	2.37655		YCR068W	0.400506	0.591924	1.47794
YCR069W	0.377272	0.455778	1.20809		YCR069W	0.377272	0.382939	1.01502
YCR071C	0.239229	0.377153	1.57654		YCR071C	0.239229	0.190271	0.795353
YCR072C	0.143259	0.243034	1.69647		YCR072C	0.143259	0.14391	1.00454
YCR073C	0.425021	0.859778	2.02291		YCR073C	0.425021	0.38779	0.912403
YCR073W-A	0.617101	1.04127	1.68737		YCR073W-A	0.617101	0.817302	1.32442
YCR075C	0.583205	1.44834	2.48342		YCR075C	0.583205	0.807429	1.38447
YCR075W-A	0.778587	1.20096	1.54249		YCR075W-A	0.778587	0.53878	0.691997
YCR076C	0.352387	0.804438	2.28282		YCR076C	0.352387	0.361437	1.02568
YCR077C	0.442944	0.690983	1.55998		YCR077C	0.442944	0.477657	1.07837
YCR079W	0.226187	0.464581	2.05397		YCR079W	0.226187	0.180495	0.797989
YCR081W	0.555692	1.02146	1.83818		YCR081W	0.555692	0.40997	0.737764
YCR082W	0.423048	0.649911	1.53626		YCR082W	0.423048	0.63552	1.50224
YCR083W	0.372334	0.345384	0.927621		YCR083W	0.372334	0.426096	1.14439
YCR084C	0.216203	0.328289	1.51842		YCR084C	0.216203	0.235242	1.08806
YCR086W	0.152547	0.453383	2.97208		YCR086W	0.152547	0.146313	0.959129
YCR087C-A	0.536942	0.818984	1.52527		YCR087C-A	0.536942	0.632857	1.17863
YCR088W	0.151001	0.479651	3.17647		YCR088W	0.151001	0.312688	2.07076
YCR089W	0.313241	0.815546	2.60358		YCR089W	0.313241	0.15345	0.489878
YCR090C	0.574298	1.00235	1.74534		YCR090C	0.574298	0.808076	1.40707
YCR091W	0.177492	0.426039	2.40033		YCR091W	0.177492	0.143764	0.809972
YCR092C	0.406527	0.732929	1.8029		YCR092C	0.406527	0.271923	0.668892
YCR093W	1.04974	1.97776	1.88405		YCR093W	1.04974	0.803275	0.765216
YCR094W	0.630015	1.01102	1.60475		YCR094W	0.630015	0.695318	1.10365
YCR095C	0.5258	0.837165	1.59217		YCR095C	0.5258	0.396886	0.754824
YCR095W-A	0.114175	0.229762	2.01236		YCR095W-A	0.114175	0.042917	0.375887
YCR098C	0.527052	0.648703	1.23081		YCR096C	0.0131591	0.00980483	0.745098
YCR101C	0.306591	0.510506	1.66511		YCR097W	0.591356	0.603098	1.01986
YCR102C	0.15484	0.11576	0.747609		YCR098C	0.527052	0.391697	0.743183
YCR106W	0.580723	1.11714	1.9237		YCR101C	0.306591	0.263589	0.85974
YDL001W	0.179445	0.253778	1.41423		YCR106W	0.580723	0.303912	0.523334
YDL002C	0.379747	0.674636	1.77654		YDL001W	0.179445	0.0536275	0.298851
YDL003W	0.236309	0.48499	2.05236		YDL002C	0.379747	0.410278	1.0804
YDL004W	1.81141	2.41151	1.33129		YDL003W	0.236309	0.160175	0.67782
YDL005C	0.427364	0.669053	1.56553		YDL004W	1.81141	2.46153	1.35891
YDL006W	0.332435	0.39907	1.20045		YDL005C	0.427364	0.321987	0.753426
YDL007W	0.681608	0.922091	1.35282		YDL006W	0.332435	0.246034	0.740098
YDL008W	0.81976	1.37032	1.67162		YDL007W	0.681608	0.726538	1.06592
YDL009C	1.49551	4.13965	2.76805		YDL008W	0.81976	0.995199	1.21401
YDL010W	0.519204	0.713985	1.37515		YDL009C	1.49551	1.46653	0.98062
YDL012C	0.126059	0.183889	1.45875		YDL010W	0.519204	0.408729	0.787222
YDL013W	0.387637	0.686105	1.76997		YDL012C	0.126059	0.150029	1.19015
YDL014W	0.294569	0.373744	1.26878		YDL013W	0.387637	0.239095	0.616802
YDL015C	0.690941	0.7093	1.02657		YDL014W	0.294569	0.394019	1.33761
YDL017W	0.491047	0.691616	1.40845		YDL015C	0.690941	0.987348	1.42899
YDL018C	0.488622	0.748879	1.53264		YDL017W	0.491047	0.271161	0.552209
YDL019C	0.313797	0.473259	1.50817		YDL018C	0.488622	0.53331	1.09146
YDL020C	0.414796	0.796413	1.92001		YDL019C	0.313797	0.373856	1.1914
YDL022W	0.185795	0.428733	2.30756		YDL020C	0.414796	0.29594	0.713458
YDL025C	0.0814197	0.300438	3.68999		YDL022W	0.185795	0.262344	1.41201
YDL027C	0.211149	0.291805	1.38199		YDL025C	0.0814197	0.165072	2.02742
YDL028C	0.125017	0.276601	2.21251		YDL027C	0.211149	0.227815	1.07893
YDL029W	0.393136	0.576388	1.46613		YDL028C	0.125017	0.0751714	0.601291
YDL030W	0.218184	0.291517	1.33611		YDL029W	0.393136	0.418741	1.06513
YDL031W	0.102187	0.156333	1.52987		YDL030W	0.218184	0.141633	0.649147
YDL033C	0.310317	0.243491	0.78465		YDL031W	0.102187	0.0925634	0.905823
YDL035C	0.119793	0.154539	1.29005		YDL033C	0.310317	0.121459	0.391403
YDL036C	0.367658	0.445196	1.2109		YDL035C	0.119793	0.0377362	0.315012
YDL037C	0.109689	0.059222	0.539906		YDL036C	0.367658	0.30048	0.817281
YDL040C	0.784303	0.900458	1.1481		YDL037C	0.109689	0.179653	1.63783
YDL042C	0.154219	0.201699	1.30787		YDL040C	0.784303	0.901779	1.14978
YDL043C	0.576083	0.944011	1.63867		YDL042C	0.154219	0.125176	0.811677
YDL044C	0.181031	0.366637	2.02527		YDL043C	0.576083	0.461267	0.800695
YDL045C	0.321718	0.344755	1.07161		YDL044C	0.181031	0.115093	0.635765
YDL045W-A	0.772219	1.08536	1.40551		YDL045C	0.321718	0.22616	0.702976
YDL046W	1.04623	1.36771	1.30727		YDL045W-A	0.772219	0.644581	0.834713
YDL047W	0.343349	0.547793	1.59544		YDL046W	1.04623	1.37889	1.31795
YDL048C	0.328723	0.308051	0.937115		YDL047W	0.343349	0.255298	0.743552
YDL049C	0.0678704	0.224097	3.30184		YDL048C	0.328723	0.412889	1.25604
YDL051W	0.646227	0.627872	0.971597		YDL049C	0.0678704	0.0403674	0.594772
YDL052C	0.944461	1.25413	1.32787		YDL051W	0.646227	0.771539	1.19391
YDL053C	0.244402	0.368596	1.50815		YDL052C	0.944461	0.97011	1.02716
YDL054C	0.325402	0.423749	1.30223		YDL053C	0.244402	0.284249	1.16304
YDL055C	1.12545	1.08117	0.960656		YDL054C	0.325402	0.212619	0.653403
YDL056W	0.177522	0.290684	1.63745		YDL055C	1.12545	1.74171	1.54757
YDL057W	0.171725	0.160599	0.935206		YDL056W	0.177522	0.0853397	0.480726
YDL058W	0.482611	0.783072	1.62257		YDL057W	0.171725	0.0698396	0.406694
YDL059C	0.256779	0.315865	1.2301		YDL058W	0.482611	0.468491	0.970741
YDL060W	0.316151	0.380863	1.20469		YDL059C	0.256779	0.124626	0.485344
YDL061C	2.63302	2.12154	0.805742		YDL060W	0.316151	0.228445	0.722581
YDL063C	0.425204	0.570213	1.34103		YDL061C	2.63302	3.04764	1.15747
YDL064W	0.503527	0.495854	0.984761		YDL063C	0.425204	0.400992	0.943059
YDL065C	0.33718	0.504198	1.49534		YDL064W	0.503527	0.501933	0.996834
YDL066W	1.03011	1.19601	1.16106		YDL065C	0.33718	0.282865	0.838916
YDL067C	0.300733	0.258546	0.859718		YDL066W	1.03011	1.73426	1.68358
YDL069C	1.03022	1.14515	1.11156		YDL067C	0.300733	0.293263	0.975159
YDL070W	0.657944	0.652574	0.991838		YDL069C	1.03022	0.793708	0.770423
YDL072C	0.772219	1.22209	1.58257		YDL070W	0.657944	0.451759	0.686623
YDL073W	0.539466	0.705682	1.30811		YDL072C	0.772219	1.05735	1.36923
YDL074C	0.728503	1.1889	1.63198		YDL073W	0.539466	0.412266	0.764211
YDL075W	3.04502	2.0321	0.667352		YDL074C	0.728503	0.68179	0.935879
YDL076C	0.251093	0.253992	1.01155		YDL075W	3.04502	3.8079	1.25053
YDL077C	0.363991	0.470279	1.29201		YDL076C	0.251093	0.2435	0.969761
YDL078C	0.550701	0.665564	1.20857		YDL077C	0.363991	0.267369	0.734548
YDL080C	0.267989	0.341604	1.27469		YDL078C	0.550701	0.821485	1.49171
YDL081C	2.92265	1.93925	0.663523		YDL080C	0.267989	0.184174	0.687246
YDL082W	1.5987	2.19592	1.37357		YDL081C	2.92265	3.60368	1.23302
YDL083C	5.14003	5.04329	0.981179		YDL082W	1.5987	3.66944	2.29527
YDL084W	0.599718	0.691888	1.15369		YDL083C	5.14003	8.83939	1.71972
YDL085C-A	0.352154	0.316154	0.897773		YDL084W	0.599718	0.81919	1.36596
YDL086C-A	0.476889	0.632693	1.32671		YDL085C-A	0.352154	0.332983	0.945561
YDL086W	0.448454	0.670563	1.49528		YDL086C-A	0.476889	0.351553	0.737179
YDL087C	0.333622	0.545395	1.63477		YDL086W	0.448454	0.670895	1.49602
YDL088C	0.0865057	0.238452	2.75649		YDL087C	0.333622	0.245079	0.7346
YDL089W	0.61626	0.519428	0.842872		YDL088C	0.0865057	0.042473	0.490985
YDL090C	0.431535	0.713345	1.65304		YDL089W	0.61626	0.361031	0.585841
YDL091C	0.379766	0.491384	1.29391		YDL090C	0.431535	0.329998	0.764706
YDL092W	0.435607	0.670853	1.54004		YDL091C	0.379766	0.288176	0.758824
YDL093W	0.192676	0.0953788	0.495022		YDL092W	0.435607	0.525948	1.20739
YDL095W	0.1319	0.158766	1.20368		YDL093W	0.192676	0.0660641	0.342877
YDL097C	0.618079	0.73926	1.19606		YDL095W	0.1319	0.1367	1.03639
YDL098C	0.454728	0.491111	1.08001		YDL097C	0.618079	0.55479	0.897603
YDL099W	0.495647	0.907062	1.83006		YDL098C	0.454728	0.387504	0.852166
YDL100C	0.88105	1.30441	1.48052		YDL099W	0.495647	0.6562	1.32393
YDL101C	0.293512	0.374761	1.27682		YDL100C	0.88105	1.69435	1.9231
YDL102W	0.328475	0.611565	1.86183		YDL101C	0.293512	0.208593	0.71068
YDL103C	0.626159	0.924974	1.47722		YDL102W	0.328475	0.315178	0.959518
YDL104C	0.0736493	0.132302	1.79638		YDL103C	0.626159	0.771658	1.23237
YDL105W	0.102042	0.215538	2.11224		YDL104C	0.0736493	0.0815223	1.1069
YDL106C	0.216363	0.406539	1.87897		YDL105W	0.102042	0.0418237	0.409867
YDL107W	0.176703	0.195369	1.10563		YDL106C	0.216363	0.151421	0.699847
YDL108W	0.603673	0.931774	1.54351		YDL107W	0.176703	0.103669	0.586682
YDL109C	0.108398	0.329868	3.04312		YDL108W	0.603673	0.458445	0.759427
YDL110C	0.157378	0.217566	1.38244		YDL109C	0.108398	0.0497062	0.458553
YDL111C	0.613753	1.14393	1.86383		YDL110C	0.157378	0.10757	0.683515
YDL112W	0.217264	0.224622	1.03387		YDL111C	0.613753	0.841985	1.37186
YDL113C	0.564906	0.952973	1.68696		YDL112W	0.217264	0.175266	0.806696
YDL114W-A	0.359763	0.264648	0.735617		YDL113C	0.564906	0.459153	0.812795
YDL115C	0.554535	0.819863	1.47847		YDL114W-A	0.359763	0.129978	0.361289
YDL116W	0.397224	0.498333	1.25454		YDL115C	0.554535	0.478149	0.862253
YDL117W	0.37288	0.505646	1.35606		YDL116W	0.397224	0.276485	0.696042
YDL119C	0.209758	0.281914	1.344		YDL117W	0.37288	0.254711	0.683092
YDL120W	0.247655	0.323481	1.30618		YDL119C	0.209758	0.143625	0.684718
YDL121C	0.910319	1.51769	1.6672		YDL120W	0.247655	0.347026	1.40125
YDL122W	0.462147	0.522113	1.12976		YDL121C	0.910319	1.24708	1.36993
YDL123W	0.43538	0.544053	1.24961		YDL122W	0.462147	0.37572	0.812988
YDL124W	0.814464	1.33914	1.6442		YDL123W	0.43538	0.529971	1.21726
YDL125C	1.21509	1.59771	1.31488		YDL124W	0.814464	1.12371	1.3797
YDL126C	0.414225	0.345827	0.834877		YDL125C	1.21509	1.62404	1.33656
YDL127W	0.192377	0.268028	1.39324		YDL126C	0.414225	0.484287	1.16914
YDL128W	0.496695	0.493881	0.994333		YDL127W	0.192377	0.0880682	0.45779
YDL129W	0.146699	0.150305	1.02458		YDL128W	0.496695	0.530797	1.06866
YDL130W	1.95834	1.41678	0.723461		YDL129W	0.146699	0.0807905	0.550725
YDL130W-A	0.323916	0.530424	1.63754		YDL130W	1.95834	2.35426	1.20217
YDL131W	0.288305	0.347366	1.20486		YDL130W-A	0.323916	0.424212	1.30964
YDL132W	0.223131	0.27725	1.24254		YDL131W	0.288305	0.304718	1.05693
YDL133C-A	0.802791	0.748957	0.932942		YDL132W	0.223131	0.172588	0.773481
YDL133W	0.207118	0.493502	2.38271		YDL133C-A	0.802791	0.818173	1.01916
YDL134C	0.843711	0.977457	1.15852		YDL133W	0.207118	0.199535	0.963391
YDL135C	0.64117	0.733453	1.14393		YDL134C	0.843711	0.819153	0.970893
YDL136W	3.64943	4.3125	1.18169		YDL135C	0.64117	0.85131	1.32775
YDL137W	1.25811	1.80088	1.43141		YDL136W	3.64943	6.82083	1.86901
YDL138W	0.108276	0.298996	2.76143		YDL137W	1.25811	1.81163	1.43996
YDL139C	0.184637	0.354307	1.91893		YDL138W	0.108276	0.105829	0.977405
YDL140C	0.393179	0.611497	1.55526		YDL139C	0.184637	0.109634	0.59378
YDL141W	0.415628	0.721458	1.73583		YDL140C	0.393179	0.590156	1.50098
YDL142C	0.381093	0.416883	1.09391		YDL141W	0.415628	0.428346	1.0306
YDL143W	0.662849	0.984034	1.48455		YDL142C	0.381093	0.208216	0.546365
YDL144C	0.366701	0.465438	1.26926		YDL143W	0.662849	0.894158	1.34896
YDL145C	0.476446	0.499815	1.04905		YDL144C	0.366701	0.383503	1.04582
YDL146W	0.297713	0.148183	0.497739		YDL145C	0.476446	0.521824	1.09524
YDL147W	0.852832	1.2529	1.46911		YDL146W	0.297713	0.0846163	0.284221
YDL148C	0.473563	0.675565	1.42656		YDL147W	0.852832	0.987143	1.15749
YDL149W	0.240884	0.284237	1.17997		YDL148C	0.473563	0.416825	0.880189
YDL150W	0.332012	0.446888	1.346		YDL149W	0.240884	0.120496	0.500223
YDL153C	0.937517	1.49088	1.59024		YDL150W	0.332012	0.236989	0.713796
YDL155W	0.244804	0.421132	1.72028		YDL153C	0.937517	1.11462	1.18891
YDL157C	1.27516	1.31527	1.03145		YDL155W	0.244804	0.200194	0.817773
YDL159W	0.29422	0.43596	1.48175		YDL157C	1.27516	1.64093	1.28685
YDL160C	0.354282	0.348328	0.983194		YDL159W	0.29422	0.167076	0.567862
YDL160C-A	0.501156	0.433094	0.86419		YDL160C	0.354282	0.209077	0.590143
YDL161W	0.41038	0.544968	1.32796		YDL160C-A	0.501156	0.367361	0.733028
YDL164C	0.329839	0.469652	1.42388		YDL161W	0.41038	0.507772	1.23732
YDL165W	0.362604	0.474216	1.30781		YDL164C	0.329839	0.247622	0.750738
YDL166C	0.243488	0.288888	1.18646		YDL165W	0.362604	0.382044	1.05361
YDL167C	0.559186	0.735831	1.3159		YDL166C	0.243488	0.255738	1.05031
YDL168W	0.31896	0.453931	1.42316		YDL167C	0.559186	0.42277	0.756046
YDL169C	0.256002	0.273086	1.06674		YDL168W	0.31896	0.469403	1.47167
YDL170W	0.311132	0.549836	1.76721		YDL169C	0.256002	0.223081	0.871404
YDL171C	0.33041	0.561104	1.69821		YDL170W	0.311132	0.255158	0.820095
YDL173W	0.181691	0.192205	1.05786		YDL171C	0.33041	0.488205	1.47757
YDL174C	0.685253	0.909457	1.32718		YDL173W	0.181691	0.106461	0.585944
YDL175C	0.351881	0.518368	1.47313		YDL174C	0.685253	0.744888	1.08703
YDL176W	0.295004	0.611711	2.07357		YDL175C	0.351881	0.235914	0.670435
YDL177C	0.275061	0.448139	1.62923		YDL176W	0.295004	0.214379	0.726701
YDL178W	0.38377	0.309616	0.806775		YDL177C	0.275061	0.210672	0.765911
YDL179W	0.173878	0.275244	1.58298		YDL178W	0.38377	0.402842	1.0497
YDL180W	0.0760914	0.121003	1.59024		YDL179W	0.173878	0.0939932	0.540571
YDL181W	0.779101	0.771192	0.989848		YDL180W	0.0760914	0.057997	0.762202
YDL182W	0.474872	0.551513	1.16139		YDL181W	0.779101	0.983952	1.26293
YDL183C	0.163803	0.602493	3.67816		YDL182W	0.474872	0.36412	0.766774
YDL184C	0.772114	0.52729	0.682917		YDL183C	0.163803	0.136232	0.831684
YDL185W	0.228668	0.233126	1.01949		YDL184C	0.772114	1.02522	1.32781
YDL187C	0.265454	0.425669	1.60355		YDL185W	0.228668	0.370817	1.62164
YDL188C	0.542473	0.632487	1.16593		YDL187C	0.265454	0.338942	1.27684
YDL189W	0.227935	0.529606	2.32349		YDL188C	0.542473	0.531407	0.979599
YDL190C	0.365301	0.332559	0.91037		YDL189W	0.227935	0.114006	0.50017
YDL191W	4.84339	4.10973	0.848524		YDL190C	0.365301	0.28735	0.786611
YDL192W	2.28256	2.65963	1.1652		YDL191W	4.84339	6.66042	1.37516
YDL193W	0.668375	1.1025	1.64952		YDL192W	2.28256	3.51038	1.53791
YDL194W	0.283036	0.445873	1.57533		YDL193W	0.668375	0.647987	0.969496
YDL195W	0.358205	0.732171	2.044		YDL194W	0.283036	0.205497	0.726045
YDL196W	0.22789	0.408631	1.79311		YDL195W	0.358205	0.570702	1.59323
YDL197C	0.261258	0.577372	2.20997		YDL196W	0.22789	0.115359	0.506203
YDL198C	0.609236	0.709268	1.16419		YDL197C	0.261258	0.159256	0.609573
YDL199C	0.307107	0.473724	1.54253		YDL198C	0.609236	0.892358	1.46472
YDL200C	0.290667	0.463742	1.59544		YDL199C	0.307107	0.105789	0.344468
YDL201W	0.331558	0.382426	1.15342		YDL200C	0.290667	0.295404	1.0163
YDL202W	0.415005	0.643577	1.55077		YDL201W	0.331558	0.348835	1.05211
YDL203C	0.151195	0.218291	1.44377		YDL202W	0.415005	0.420426	1.01306
YDL204W	0.280712	0.368626	1.31318		YDL203C	0.151195	0.104877	0.693652
YDL205C	0.369846	0.387216	1.04696		YDL204W	0.280712	0.263317	0.938033
YDL206W	0.191279	0.133471	0.697781		YDL205C	0.369846	0.366064	0.989773
YDL207W	0.394479	0.678155	1.71912		YDL206W	0.191279	0.112534	0.588325
YDL208W	1.4949	2.17885	1.45752		YDL207W	0.394479	0.479954	1.21668
YDL209C	0.289259	0.480881	1.66246		YDL208W	1.4949	1.84613	1.23495
YDL211C	0.128977	0.232337	1.80138		YDL209C	0.289259	0.156663	0.5416
YDL212W	1.67043	2.45671	1.4707		YDL211C	0.128977	0.0629445	0.488029
YDL213C	0.673768	0.858741	1.27454		YDL212W	1.67043	2.34332	1.40283
YDL215C	0.136143	0.179751	1.32031		YDL213C	0.673768	0.661756	0.982173
YDL216C	0.220381	0.387507	1.75835		YDL215C	0.136143	0.0655001	0.481113
YDL217C	0.167481	0.178048	1.0631		YDL216C	0.220381	0.118452	0.537489
YDL219W	0.549258	0.538256	0.979971		YDL217C	0.167481	0.121159	0.723418
YDL220C	0.549265	0.744189	1.35488		YDL219W	0.549258	0.77404	1.40925
YDL224C	0.495145	0.899515	1.81667		YDL220C	0.549265	0.386945	0.704479
YDL225W	0.24985	0.299385	1.19826		YDL224C	0.495145	0.383657	0.774837
YDL226C	0.30092	0.36502	1.21302		YDL225W	0.24985	0.245364	0.982043
YDL227C	0.328052	0.328663	1.00186		YDL226C	0.30092	0.342716	1.1389
YDL229W	1.40089	1.28147	0.914757		YDL227C	0.328052	0.123781	0.377322
YDL230W	0.398864	0.659478	1.65339		YDL229W	1.40089	2.56914	1.83394
YDL231C	0.654657	1.32731	2.02748		YDL230W	0.398864	0.315383	0.790703
YDL232W	0.575938	0.368577	0.639958		YDL231C	0.654657	0.731346	1.11714
YDL233W	0.394611	0.354071	0.897265		YDL232W	0.575938	0.341927	0.593686
YDL234C	0.321332	0.240705	0.749087		YDL233W	0.394611	0.165884	0.420373
YDL235C	0.84219	1.06074	1.2595		YDL234C	0.321332	0.138976	0.432499
YDL236W	0.3691	0.486565	1.31825		YDL235C	0.84219	1.14642	1.36123
YDL237W	0.355215	0.337147	0.949136		YDL236W	0.3691	0.384618	1.04204
YDL238C	0.535201	0.437674	0.817775		YDL237W	0.355215	0.383359	1.07923
YDL240W	0.258051	0.46052	1.78461		YDL238C	0.535201	0.258994	0.483918
YDL241W	0.171609	0.1647	0.959739		YDL240W	0.258051	0.12888	0.499438
YDL243C	0.195009	0.646193	3.31365		YDL241W	0.171609	0.0909565	0.530021
YDR001C	0.581522	0.667672	1.14815		YDL243C	0.195009	0.15885	0.814578
YDR002W	0.987526	1.53015	1.54948		YDR001C	0.581522	0.523081	0.899504
YDR003W	0.702563	1.02352	1.45683		YDR002W	0.987526	2.22893	2.25708
YDR004W	0.296197	0.498729	1.68378		YDR003W	0.702563	0.452661	0.6443
YDR005C	0.474373	0.483491	1.01922		YDR004W	0.296197	0.25884	0.873878
YDR006C	0.308137	0.608364	1.97433		YDR005C	0.474373	0.246786	0.520237
YDR007W	0.427175	1.11085	2.60046		YDR006C	0.308137	0.261073	0.847262
YDR011W	0.25648	0.577183	2.2504		YDR007W	0.427175	0.419428	0.981867
YDR012W	0.706565	0.828856	1.17308		YDR011W	0.25648	0.2855	1.11315
YDR013W	0.521899	0.615857	1.18003		YDR012W	0.706565	1.53227	2.16862
YDR014W	0.4121	0.579902	1.40719		YDR013W	0.521899	0.34653	0.66398
YDR016C	0.524944	0.475535	0.905879		YDR014W	0.4121	0.262545	0.63709
YDR017C	0.203147	0.205983	1.01396		YDR016C	0.524944	0.342639	0.652717
YDR019C	0.295709	0.58372	1.97397		YDR017C	0.203147	0.123172	0.60632
YDR020C	0.260383	0.286914	1.10189		YDR019C	0.295709	0.604378	2.04383
YDR021W	0.134506	0.21276	1.58179		YDR020C	0.260383	0.214814	0.824992
YDR022C	0.651302	0.950745	1.45976		YDR021W	0.134506	0.108489	0.806572
YDR023W	1.00111	0.94675	0.945698		YDR022C	0.651302	0.546918	0.839731
YDR025W	1.73555	1.46974	0.846845		YDR023W	1.00111	1.10083	1.0996
YDR026C	0.248873	0.424053	1.70389		YDR025W	1.73555	2.87443	1.65621
YDR027C	0.169186	0.210641	1.24502		YDR026C	0.248873	0.228723	0.919032
YDR028C	0.574978	0.940569	1.63584		YDR027C	0.169186	0.123502	0.729978
YDR030C	0.494043	0.728856	1.47529		YDR028C	0.574978	0.650952	1.13213
YDR031W	0.840933	0.826237	0.982524		YDR030C	0.494043	0.305688	0.618746
YDR032C	0.655156	1.01631	1.55125		YDR031W	0.840933	0.973777	1.15797
YDR033W	1.84955	1.39868	0.756225		YDR032C	0.655156	1.11891	1.70785
YDR034C	0.36302	0.596941	1.64438		YDR033W	1.84955	1.87846	1.01563
YDR034W-B	2.32328	0.535992	0.230705		YDR034C	0.36302	0.239006	0.658382
YDR035W	0.2062	0.217528	1.05493		YDR034W-B	2.32328	0.928101	0.399478
YDR036C	0.403462	0.511036	1.26663		YDR035W	0.2062	0.211614	1.02626
YDR037W	0.890521	1.42063	1.59528		YDR036C	0.403462	0.326181	0.808454
YDR041W	0.499102	0.71013	1.42282		YDR037W	0.890521	1.74644	1.96114
YDR042C	0.655592	0.36153	0.551455		YDR041W	0.499102	0.456335	0.914312
YDR043C	0.240152	0.272141	1.1332		YDR042C	0.655592	0.38541	0.587881
YDR044W	0.202614	0.377729	1.86428		YDR043C	0.240152	0.0607726	0.253059
YDR045C	0.665046	0.867802	1.30488		YDR044W	0.202614	0.322218	1.59031
YDR046C	0.454228	1.02083	2.2474		YDR045C	0.665046	0.705538	1.06089
YDR047W	0.955343	1.4302	1.49706		YDR046C	0.454228	0.528642	1.16383
YDR049W	0.204403	0.255845	1.25167		YDR047W	0.955343	0.84426	0.883724
YDR050C	3.38904	4.29367	1.26693		YDR049W	0.204403	0.133376	0.652514
YDR051C	0.279223	0.324937	1.16372		YDR050C	3.38904	7.3269	2.16194
YDR052C	0.141411	0.208248	1.47265		YDR051C	0.279223	0.295096	1.05685
YDR054C	0.184404	0.194336	1.05386		YDR052C	0.141411	0.105378	0.745193
YDR055W	0.347963	0.5104	1.46682		YDR054C	0.184404	0.157314	0.853091
YDR056C	0.923943	1.1262	1.21891		YDR055W	0.347963	0.266928	0.767115
YDR057W	0.177087	0.254323	1.43615		YDR056C	0.923943	1.12269	1.21511
YDR058C	0.244228	0.628024	2.57147		YDR057W	0.177087	0.159131	0.898606
YDR059C	0.48592	0.819422	1.68633		YDR058C	0.244228	0.127475	0.521953
YDR060W	0.465093	0.8209	1.76502		YDR059C	0.48592	0.530539	1.09182
YDR061W	0.47685	0.456306	0.956917		YDR060W	0.465093	0.62429	1.34229
YDR062W	0.841548	0.949081	1.12778		YDR061W	0.47685	0.420645	0.882133
YDR063W	0.513601	0.821508	1.59951		YDR062W	0.841548	0.933941	1.10979
YDR064W	4.93282	5.17875	1.04986		YDR063W	0.513601	0.684296	1.33235
YDR065W	0.279773	0.311836	1.11461		YDR064W	4.93282	8.06846	1.63567
YDR066C	0.443968	0.44852	1.01025		YDR065W	0.279773	0.190731	0.681736
YDR067C	0.332602	0.431944	1.29868		YDR066C	0.443968	0.225014	0.506825
YDR068W	0.186863	0.322797	1.72745		YDR067C	0.332602	0.240227	0.722264
YDR069C	0.383451	0.645957	1.68459		YDR068W	0.186863	0.194707	1.04198
YDR070C	0.136671	0.174691	1.27818		YDR069C	0.383451	0.272815	0.711473
YDR071C	0.668098	0.999128	1.49548		YDR070C	0.136671	0.104537	0.764881
YDR072C	0.354191	0.348448	0.983786		YDR071C	0.668098	0.852621	1.27619
YDR073W	0.48393	0.724192	1.49648		YDR072C	0.354191	0.215899	0.609554
YDR074W	0.489716	0.812891	1.65992		YDR073W	0.48393	0.406691	0.840393
YDR075W	0.193252	0.186571	0.965429		YDR074W	0.489716	0.571011	1.166
YDR076W	0.491824	0.612762	1.2459		YDR075W	0.193252	0.0947473	0.490279
YDR077W	0.35233	1.62141	4.60196		YDR076W	0.491824	0.227682	0.462934
YDR078C	0.642067	1.35567	2.11142		YDR077W	0.35233	1.08831	3.08889
YDR079C-A	0.487933	0.657185	1.34687		YDR078C	0.642067	0.69717	1.08582
YDR079W	0.235183	0.232601	0.989024		YDR079C-A	0.487933	0.460583	0.943946
YDR080W	0.183342	0.288849	1.57547		YDR079W	0.235183	0.175208	0.744986
YDR081C	0.238143	0.278362	1.16889		YDR080W	0.183342	0.163051	0.88933
YDR082W	0.26837	0.310271	1.15613		YDR081C	0.238143	0.16992	0.713524
YDR083W	0.307275	0.380452	1.23815		YDR082W	0.26837	0.179436	0.668614
YDR084C	1.01958	1.3414	1.31565		YDR083W	0.307275	0.274792	0.894287
YDR085C	0.333496	0.706921	2.11973		YDR084C	1.01958	0.811878	0.796289
YDR086C	1.31007	1.59364	1.21646		YDR085C	0.333496	0.513348	1.5393
YDR087C	0.36339	0.42388	1.16646		YDR086C	1.31007	1.67475	1.27837
YDR088C	0.170077	0.274836	1.61596		YDR087C	0.36339	0.373811	1.02868
YDR089W	0.189499	0.289934	1.53		YDR088C	0.170077	0.0969902	0.570274
YDR090C	0.460338	0.64161	1.39378		YDR089W	0.189499	0.165166	0.871594
YDR091C	0.395998	0.417496	1.05429		YDR090C	0.460338	0.353164	0.767184
YDR092W	0.332607	0.331182	0.995716		YDR091C	0.395998	0.484274	1.22292
YDR093W	0.512094	0.831925	1.62456		YDR092W	0.332607	0.316442	0.9514
YDR096W	0.213854	0.339561	1.58782		YDR093W	0.512094	0.613168	1.19737
YDR097C	0.199885	0.302769	1.51472		YDR096W	0.213854	0.178221	0.83338
YDR098C	0.641772	0.787425	1.22696		YDR097C	0.199885	0.201697	1.00907
YDR099W	0.3666	0.386923	1.05544		YDR098C	0.641772	0.821981	1.2808
YDR100W	0.641861	0.905207	1.41028		YDR099W	0.3666	0.425841	1.1616
YDR101C	1.22218	2.051	1.67814		YDR100W	0.641861	0.872225	1.3589
YDR103W	0.420844	0.779526	1.85229		YDR101C	1.22218	1.05159	0.860417
YDR104C	0.338038	0.537889	1.59121		YDR103W	0.420844	0.357502	0.849488
YDR105C	0.179429	0.170734	0.951541		YDR104C	0.338038	0.191622	0.566866
YDR106W	0.353036	0.344352	0.9754		YDR105C	0.179429	0.108539	0.604915
YDR107C	0.73916	0.886255	1.199		YDR106W	0.353036	0.191968	0.543762
YDR108W	0.235735	0.22984	0.974993		YDR107C	0.73916	0.868076	1.17441
YDR109C	0.165092	0.340709	2.06375		YDR108W	0.235735	0.156249	0.662818
YDR110W	0.655183	1.08638	1.65814		YDR109C	0.165092	0.154783	0.937557
YDR111C	0.107297	0.19583	1.82511		YDR110W	0.655183	0.386814	0.590391
YDR113C	0.252027	0.384399	1.52523		YDR111C	0.107297	0.0180213	0.167957
YDR115W	0.897141	1.0094	1.12513		YDR113C	0.252027	0.107568	0.42681
YDR116C	0.397124	0.535476	1.34839		YDR115W	0.897141	0.9521	1.06126
YDR117C	0.376999	0.401157	1.06408		YDR116C	0.397124	0.373824	0.941327
YDR118W	0.0880596	0.0929392	1.05541		YDR117C	0.376999	0.318342	0.844411
YDR119W	0.774028	0.853556	1.10275		YDR118W	0.0880596	0.0489816	0.556232
YDR119W-A	0.306922	0.378977	1.23477		YDR119W	0.774028	0.723199	0.934331
YDR120C	0.388293	0.567988	1.46278		YDR119W-A	0.306922	0.269293	0.877401
YDR121W	0.0908698	0.0690404	0.759772		YDR120C	0.388293	0.29838	0.768441
YDR122W	0.543772	0.836012	1.53743		YDR121W	0.0908698	0.0552209	0.607693
YDR123C	0.246439	0.396537	1.60907		YDR122W	0.543772	0.585944	1.07755
YDR124W	0.780732	1.09488	1.40238		YDR123C	0.246439	0.141883	0.57573
YDR125C	0.214427	0.306011	1.42711		YDR124W	0.780732	0.35459	0.454177
YDR126W	0.176896	0.308842	1.7459		YDR125C	0.214427	0.135823	0.633423
YDR127W	0.465515	0.721124	1.54909		YDR126W	0.176896	0.0964803	0.545406
YDR128W	0.289659	0.494777	1.70814		YDR127W	0.465515	0.569753	1.22392
YDR129C	0.469988	0.701265	1.49209		YDR128W	0.289659	0.302781	1.0453
YDR130C	0.35289	0.592872	1.68005		YDR129C	0.469988	0.791425	1.68393
YDR131C	0.359256	0.67026	1.86569		YDR130C	0.35289	0.240121	0.680442
YDR132C	0.579006	0.8907	1.53833		YDR131C	0.359256	0.270774	0.753708
YDR133C	0.944137	2.71643	2.87716		YDR132C	0.579006	0.409286	0.706877
YDR135C	1.0499	1.25577	1.19609		YDR133C	0.944137	1.99033	2.1081
YDR137W	0.281446	0.458988	1.63082		YDR135C	1.0499	1.01305	0.964899
YDR138W	0.376918	0.503344	1.33542		YDR137W	0.281446	0.216828	0.770406
YDR139C	0.319776	0.277476	0.867719		YDR138W	0.376918	0.25954	0.688585
YDR140W	1.1067	1.73795	1.57039		YDR139C	0.319776	0.301908	0.944121
YDR141C	0.666217	0.965285	1.44891		YDR140W	1.1067	1.12411	1.01573
YDR142C	0.372384	0.529456	1.4218		YDR141C	0.666217	0.598082	0.897729
YDR143C	0.199245	0.209348	1.05071		YDR142C	0.372384	0.24343	0.653705
YDR144C	0.303772	0.276888	0.911498		YDR143C	0.199245	0.123643	0.620557
YDR145W	0.324885	0.540507	1.66369		YDR144C	0.303772	0.335674	1.10502
YDR146C	0.191956	0.288251	1.50165		YDR145W	0.324885	0.293346	0.902924
YDR147W	0.419532	0.972346	2.31769		YDR146C	0.191956	0.13002	0.677343
YDR148C	0.435376	0.523102	1.2015		YDR147W	0.419532	0.261539	0.623407
YDR150W	0.586026	1.0178	1.73677		YDR148C	0.435376	0.435235	0.999676
YDR151C	0.411904	0.622667	1.51168		YDR150W	0.586026	0.75398	1.2866
YDR152W	0.355664	0.398003	1.11904		YDR151C	0.411904	0.195357	0.474279
YDR153C	0.191644	0.250982	1.30963		YDR152W	0.355664	0.379993	1.0684
YDR155C	1.73658	1.62266	0.934399		YDR153C	0.191644	0.105037	0.548086
YDR156W	0.78795	1.29422	1.64252		YDR155C	1.73658	2.09143	1.20434
YDR158W	1.46926	1.97977	1.34746		YDR156W	0.78795	1.2164	1.54375
YDR159W	0.286352	0.592169	2.06798		YDR158W	1.46926	3.04977	2.07571
YDR160W	0.274479	0.404457	1.47355		YDR159W	0.286352	0.287246	1.00312
YDR161W	0.434734	0.474018	1.09036		YDR160W	0.274479	0.183098	0.667074
YDR162C	0.147947	0.286387	1.93574		YDR161W	0.434734	0.421715	0.970051
YDR163W	0.145114	0.222586	1.53387		YDR162C	0.147947	0.128936	0.8715
YDR164C	0.401401	0.429927	1.07107		YDR163W	0.145114	0.124061	0.854917
YDR165W	0.623123	0.658997	1.05757		YDR164C	0.401401	0.292947	0.729812
YDR166C	0.510604	0.797445	1.56177		YDR165W	0.623123	0.544592	0.873972
YDR167W	1.01799	1.46789	1.44195		YDR166C	0.510604	0.454589	0.890297
YDR168W	0.350892	0.442281	1.26045		YDR167W	1.01799	1.12485	1.10497
YDR169C	0.207442	0.302822	1.45979		YDR168W	0.350892	0.378805	1.07955
YDR170C	0.288855	0.522617	1.80927		YDR169C	0.207442	0.148383	0.7153
YDR171W	0.254429	0.254924	1.00195		YDR170C	0.288855	0.501989	1.73786
YDR172W	0.635872	1.07494	1.6905		YDR171W	0.254429	0.157442	0.618806
YDR173C	0.213213	0.142585	0.668744		YDR172W	0.635872	1.10573	1.73892
YDR175C	0.501301	0.614218	1.22525		YDR173C	0.213213	0.0796598	0.373616
YDR176W	0.283477	0.529998	1.86963		YDR174W	0.556262	1.15648	2.07901
YDR177W	0.564526	0.793765	1.40607		YDR175C	0.501301	0.369891	0.737862
YDR178W	0.500785	0.76683	1.53126		YDR176W	0.283477	0.176158	0.621418
YDR179C	0.709658	1.11712	1.57417		YDR177W	0.564526	0.449515	0.79627
YDR179W-A	0.205491	0.224736	1.09365		YDR178W	0.500785	0.804151	1.60578
YDR180W	0.33279	0.547146	1.64412		YDR179C	0.709658	0.469334	0.661353
YDR181C	0.263804	0.504905	1.91394		YDR179W-A	0.205491	0.11829	0.575646
YDR182W	0.374193	0.330045	0.882019		YDR180W	0.33279	0.30112	0.904836
YDR183W	0.576971	0.69313	1.20132		YDR181C	0.263804	0.167707	0.635728
YDR184C	0.646131	0.943062	1.45955		YDR182W	0.374193	0.312518	0.835179
YDR185C	0.399564	0.657022	1.64435		YDR183W	0.576971	0.528867	0.916625
YDR186C	0.247853	0.464547	1.87428		YDR184C	0.646131	0.630335	0.975552
YDR188W	0.942701	1.43867	1.52612		YDR185C	0.399564	0.474698	1.18804
YDR189W	0.224664	0.349639	1.55627		YDR186C	0.247853	0.13724	0.553716
YDR190C	1.10692	1.63686	1.47875		YDR188W	0.942701	1.11082	1.17833
YDR191W	0.126125	0.275088	2.18108		YDR189W	0.224664	0.250275	1.114
YDR192C	0.0853597	0.153965	1.80372		YDR190C	1.10692	1.03559	0.935564
YDR194C	0.344333	0.348403	1.01182		YDR191W	0.126125	0.0821402	0.65126
YDR195W	0.142395	0.151845	1.06636		YDR192C	0.0853597	0.0570922	0.668842
YDR196C	0.75513	1.1312	1.49802		YDR194C	0.344333	0.360901	1.04812
YDR197W	0.205951	0.223128	1.0834		YDR195W	0.142395	0.0697198	0.489622
YDR198C	0.279217	0.488469	1.74943		YDR196C	0.75513	1.0708	1.41803
YDR200C	0.315144	0.594035	1.88496		YDR197W	0.205951	0.173353	0.841719
YDR201W	0.592796	0.705852	1.19072		YDR198C	0.279217	0.177931	0.637252
YDR202C	0.355463	0.365976	1.02958		YDR200C	0.315144	0.321251	1.01938
YDR204W	0.230542	0.349728	1.51698		YDR201W	0.592796	0.551937	0.931074
YDR205W	0.455438	0.879782	1.93173		YDR202C	0.355463	0.27402	0.770882
YDR206W	0.329947	0.509167	1.54318		YDR204W	0.230542	0.28774	1.2481
YDR207C	0.168944	0.328149	1.94235		YDR205W	0.455438	0.399489	0.877153
YDR208W	0.318349	0.608332	1.91089		YDR206W	0.329947	0.345609	1.04747
YDR210W	0.782806	0.774367	0.989219		YDR207C	0.168944	0.140073	0.829107
YDR211W	0.46088	0.527754	1.1451		YDR208W	0.318349	0.349258	1.09709
YDR212W	0.720513	1.19422	1.65745		YDR210W	0.782806	1.0311	1.31719
YDR213W	0.130272	0.200332	1.5378		YDR211W	0.46088	0.487827	1.05847
YDR214W	0.69843	1.47348	2.10971		YDR212W	0.720513	1.19855	1.66347
YDR216W	0.103354	0.768277	7.43345		YDR213W	0.130272	0.04329	0.332304
YDR217C	0.258658	0.415085	1.60476		YDR214W	0.69843	0.880986	1.26138
YDR219C	0.258746	0.351526	1.35858		YDR216W	0.103354	0.365192	3.53341
YDR221W	0.33299	0.351984	1.05704		YDR217C	0.258658	0.18666	0.721647
YDR222W	0.397987	0.4032	1.0131		YDR219C	0.258746	0.155891	0.602486
YDR224C	1.20409	1.07866	0.895832		YDR221W	0.33299	0.350193	1.05166
YDR225W	2.54891	3.59722	1.41128		YDR222W	0.397987	0.187293	0.470602
YDR226W	1.34581	1.06735	0.79309		YDR224C	1.20409	0.651718	0.541253
YDR227W	0.130373	0.316249	2.42573		YDR225W	2.54891	2.79663	1.09719
YDR228C	0.740728	1.80615	2.43834		YDR226W	1.34581	2.02982	1.50825
YDR229W	0.111525	0.151045	1.35436		YDR227W	0.130373	0.110262	0.845748
YDR231C	0.518345	0.821413	1.58468		YDR228C	0.740728	0.361592	0.488158
YDR232W	0.653922	0.797953	1.22026		YDR229W	0.111525	0.073967	0.663235
YDR233C	0.897399	0.809924	0.902524		YDR231C	0.518345	0.490313	0.94592
YDR234W	0.425611	0.602423	1.41543		YDR232W	0.653922	0.719453	1.10021
YDR235W	0.513691	0.655861	1.27676		YDR233C	0.897399	0.910365	1.01445
YDR236C	0.520632	0.702974	1.35023		YDR234W	0.425611	0.395763	0.92987
YDR237W	0.261216	0.378023	1.44717		YDR235W	0.513691	0.330558	0.643496
YDR238C	0.36027	0.420799	1.16801		YDR236C	0.520632	0.52238	1.00336
YDR239C	0.295979	0.315753	1.06681		YDR237W	0.261216	0.324197	1.24111
YDR240C	0.189803	0.186145	0.98073		YDR238C	0.36027	0.466124	1.29382
YDR242W	0.118611	0.125126	1.05493		YDR239C	0.295979	0.158661	0.536054
YDR243C	0.546013	0.750045	1.37367		YDR240C	0.189803	0.0832876	0.438811
YDR244W	0.150816	0.190436	1.2627		YDR242W	0.118611	0.088309	0.744528
YDR245W	0.621537	0.760485	1.22356		YDR243C	0.546013	0.346979	0.635477
YDR246W	0.326678	0.49298	1.50907		YDR244W	0.150816	0.112347	0.744928
YDR247W	0.563209	0.446936	0.793552		YDR245W	0.621537	0.589337	0.948193
YDR248C	0.350118	0.311331	0.889218		YDR246W	0.326678	0.23675	0.72472
YDR249C	0.707981	1.03976	1.46862		YDR247W	0.563209	0.228575	0.405844
YDR251W	0.644553	0.675514	1.04803		YDR248C	0.350118	0.319594	0.912818
YDR252W	0.342113	0.596895	1.74473		YDR249C	0.707981	0.609502	0.860901
YDR253C	0.137081	0.359307	2.62112		YDR251W	0.644553	0.469891	0.729019
YDR254W	0.510281	0.926829	1.81631		YDR252W	0.342113	0.29074	0.849837
YDR255C	0.40244	0.794588	1.97443		YDR253C	0.137081	0.097978	0.714744
YDR257C	0.947941	1.22676	1.29413		YDR254W	0.510281	0.485101	0.950654
YDR258C	0.344752	0.568134	1.64795		YDR255C	0.40244	0.456357	1.13398
YDR259C	0.210788	0.259144	1.2294		YDR257C	0.947941	0.788992	0.832321
YDR260C	0.473957	0.649583	1.37055		YDR258C	0.344752	0.210666	0.611066
YDR261C	0.18882	0.166006	0.87918		YDR259C	0.210788	0.199716	0.947472
YDR262W	0.27868	0.333625	1.19716		YDR260C	0.473957	0.45728	0.964813
YDR263C	0.063537	0.177593	2.79511		YDR261C	0.18882	0.203521	1.07786
YDR264C	0.369872	0.668192	1.80655		YDR262W	0.27868	0.187277	0.672017
YDR265W	0.253096	0.266534	1.0531		YDR263C	0.063537	0.0650167	1.02329
YDR266C	0.211048	0.339876	1.61042		YDR264C	0.369872	0.429638	1.16159
YDR267C	0.342927	0.596426	1.73922		YDR265W	0.253096	0.108814	0.429934
YDR268W	0.4033	0.445948	1.10575		YDR266C	0.211048	0.218367	1.03468
YDR270W	0.398666	0.81709	2.04956		YDR267C	0.342927	0.315092	0.91883
YDR272W	0.773805	1.10612	1.42945		YDR268W	0.4033	0.339969	0.842968
YDR275W	0.636556	0.833988	1.31016		YDR270W	0.398666	0.245027	0.614618
YDR276C	1.10379	0.937934	0.849738		YDR272W	0.773805	0.783381	1.01238
YDR277C	0.176715	0.393837	2.22865		YDR275W	0.636556	0.324711	0.510106
YDR279W	0.386169	0.382409	0.990261		YDR276C	1.10379	1.1153	1.01042
YDR280W	0.328106	0.718991	2.19134		YDR277C	0.176715	0.101103	0.572125
YDR281C	0.474444	0.113067	0.238314		YDR279W	0.386169	0.29576	0.765882
YDR282C	0.520943	0.8231	1.58002		YDR280W	0.328106	0.317464	0.967566
YDR283C	0.331837	0.722436	2.17708		YDR281C	0.474444	0.165856	0.34958
YDR284C	0.482586	0.510049	1.05691		YDR282C	0.520943	0.32498	0.623831
YDR286C	0.223695	0.611271	2.73262		YDR283C	0.331837	0.178225	0.537084
YDR287W	0.28384	0.297717	1.04889		YDR284C	0.482586	0.35126	0.72787
YDR288W	0.310657	0.408896	1.31623		YDR286C	0.223695	0.304894	1.36299
YDR289C	0.558639	0.838094	1.50024		YDR287W	0.28384	0.208279	0.73379
YDR291W	0.445004	0.75914	1.70592		YDR288W	0.310657	0.2734	0.88007
YDR292C	0.209455	0.258741	1.23531		YDR289C	0.558639	0.359992	0.644409
YDR293C	0.459299	0.363263	0.790908		YDR291W	0.445004	0.445899	1.00201
YDR294C	0.871148	1.02318	1.17452		YDR292C	0.209455	0.242039	1.15557
YDR295C	0.164295	0.178785	1.08819		YDR293C	0.459299	0.279102	0.607671
YDR296W	0.510887	0.785587	1.53769		YDR294C	0.871148	0.791622	0.90871
YDR297W	0.746398	1.05393	1.41202		YDR295C	0.164295	0.0954611	0.581034
YDR298C	0.581924	0.685126	1.17735		YDR296W	0.510887	0.581881	1.13896
YDR299W	0.389466	0.546499	1.4032		YDR297W	0.746398	0.714515	0.957284
YDR300C	0.252111	0.499994	1.98323		YDR298C	0.581924	0.922228	1.58479
YDR301W	0.288744	0.426813	1.47817		YDR299W	0.389466	0.313703	0.80547
YDR302W	0.6337	0.845389	1.33405		YDR300C	0.252111	0.299209	1.18681
YDR303C	0.463807	0.660402	1.42387		YDR301W	0.288744	0.202824	0.702437
YDR304C	0.606392	0.69423	1.14485		YDR302W	0.6337	0.62328	0.983557
YDR305C	0.0927075	0.118088	1.27377		YDR303C	0.463807	0.308985	0.666193
YDR306C	0.51623	0.81359	1.57602		YDR304C	0.606392	0.974117	1.60641
YDR307W	0.319814	0.359166	1.12305		YDR305C	0.0927075	0.0772106	0.832841
YDR308C	0.146157	0.160899	1.10086		YDR306C	0.51623	0.316081	0.612288
YDR309C	0.178705	0.39266	2.19726		YDR307W	0.319814	0.198609	0.621015
YDR310C	0.148779	0.154598	1.03911		YDR308C	0.146157	0.134299	0.918867
YDR311W	0.225199	0.481177	2.13667		YDR309C	0.178705	0.117501	0.657518
YDR312W	0.369488	0.488021	1.3208		YDR310C	0.148779	0.11742	0.789224
YDR313C	0.0471261	0.0757206	1.60677		YDR311W	0.225199	0.232432	1.03212
YDR314C	0.410541	0.718026	1.74898		YDR312W	0.369488	0.266307	0.720746
YDR315C	0.769703	1.06603	1.38498		YDR313C	0.0471261	0.0256648	0.544599
YDR316W	0.53906	0.718354	1.33261		YDR314C	0.410541	0.260861	0.635409
YDR317W	0.621211	0.788493	1.26928		YDR315C	0.769703	0.788445	1.02435
YDR318W	0.324293	0.532983	1.64352		YDR316W	0.53906	0.538476	0.998916
YDR319C	0.731002	1.40373	1.92028		YDR317W	0.621211	0.333307	0.536545
YDR320C	0.286347	0.491339	1.71589		YDR318W	0.324293	0.242464	0.747669
YDR320C-A	0.282471	0.262818	0.930425		YDR319C	0.731002	0.752862	1.0299
YDR320W-B	0.185426	0.330438	1.78205		YDR320C	0.286347	0.293915	1.02643
YDR321W	0.411045	0.480512	1.169		YDR320C-A	0.282471	0.177478	0.628306
YDR322C-A	1.13002	1.2709	1.12467		YDR320W-B	0.185426	0.171707	0.92601
YDR322W	0.525354	0.88386	1.68241		YDR321W	0.411045	0.589119	1.43322
YDR323C	0.258216	0.415494	1.60909		YDR322C-A	1.13002	1.54693	1.36894
YDR324C	0.390026	0.4601	1.17967		YDR322W	0.525354	0.460452	0.87646
YDR325W	0.373417	0.445992	1.19435		YDR323C	0.258216	0.15463	0.598839
YDR326C	0.306685	0.497593	1.62249		YDR324C	0.390026	0.321787	0.82504
YDR328C	0.439829	0.637763	1.45002		YDR325W	0.373417	0.291391	0.780338
YDR329C	0.339976	0.387026	1.13839		YDR326C	0.306685	0.276615	0.90195
YDR330W	0.197541	0.208854	1.05727		YDR328C	0.439829	0.6359	1.44579
YDR331W	0.306908	0.348818	1.13656		YDR329C	0.339976	0.219302	0.645052
YDR332W	0.182877	0.142763	0.780649		YDR330W	0.197541	0.146578	0.74201
YDR333C	0.430479	0.971028	2.25569		YDR331W	0.306908	0.219325	0.714627
YDR334W	0.405105	0.766185	1.89132		YDR332W	0.182877	0.0801017	0.438008
YDR335W	0.936225	1.27845	1.36554		YDR333C	0.430479	0.439628	1.02125
YDR336W	0.208951	0.131428	0.628992		YDR334W	0.405105	0.374617	0.924741
YDR337W	0.662852	0.704311	1.06255		YDR335W	0.936225	0.862916	0.921698
YDR338C	0.372106	0.535272	1.43849		YDR336W	0.208951	0.139783	0.668975
YDR339C	0.932732	1.56953	1.68272		YDR337W	0.662852	0.625708	0.943963
YDR341C	0.675204	0.814896	1.20689		YDR338C	0.372106	0.21495	0.577659
YDR342C	0.0315807	0.0390859	1.23765		YDR339C	0.932732	0.875358	0.938489
YDR344C	0.172181	0.281209	1.63321		YDR341C	0.675204	0.955632	1.41532
YDR345C	0.118965	0.0724347	0.608876		YDR342C	0.0315807	0.0457409	1.44838
YDR346C	0.415182	0.397969	0.95854		YDR344C	0.172181	0.106755	0.620017
YDR347W	0.497625	0.653704	1.31365		YDR345C	0.118965	0.0940928	0.790931
YDR348C	0.310804	0.45283	1.45696		YDR346C	0.415182	0.388723	0.93627
YDR349C	0.488624	0.68793	1.40789		YDR347W	0.497625	0.568643	1.14272
YDR350C	0.782778	1.06099	1.35541		YDR348C	0.310804	0.188711	0.60717
YDR351W	0.384803	0.820945	2.13342		YDR349C	0.488624	0.517204	1.05849
YDR352W	0.556687	0.824712	1.48146		YDR350C	0.782778	0.472078	0.60308
YDR353W	0.493073	0.633906	1.28562		YDR351W	0.384803	0.249527	0.648454
YDR354W	0.417091	0.69877	1.67534		YDR352W	0.556687	0.390945	0.70227
YDR356W	0.473524	0.712131	1.50389		YDR353W	0.493073	0.759923	1.5412
YDR357C	0.241977	0.415036	1.71519		YDR354W	0.417091	0.581878	1.39509
YDR358W	0.231093	0.284921	1.23293		YDR356W	0.473524	0.320014	0.675813
YDR359C	0.362082	0.651637	1.7997		YDR357C	0.241977	0.262132	1.08329
YDR361C	0.367458	0.533791	1.45266		YDR358W	0.231093	0.122397	0.529647
YDR362C	0.23906	0.354022	1.48089		YDR359C	0.362082	0.170253	0.470205
YDR363W	0.0742172	0.519758	7.00319		YDR361C	0.367458	0.528788	1.43905
YDR363W-A	0.39547	0.583661	1.47587		YDR362C	0.23906	0.198204	0.829098
YDR364C	0.392662	0.562768	1.43321		YDR363W	0.0742172	0.285086	3.84124
YDR365C	0.473066	0.60627	1.28158		YDR363W-A	0.39547	0.624438	1.57898
YDR367W	1.02653	1.38733	1.35147		YDR364C	0.392662	0.344921	0.878417
YDR368W	0.441829	0.458517	1.03777		YDR365C	0.473066	0.47883	1.01219
YDR369C	0.273039	0.595897	2.18246		YDR367W	1.02653	1.10108	1.07263
YDR370C	0.288702	0.449218	1.55599		YDR368W	0.441829	0.708314	1.60314
YDR371W	0.373114	0.63001	1.68852		YDR369C	0.273039	0.270254	0.989802
YDR372C	0.506728	0.734749	1.44999		YDR370C	0.288702	0.244861	0.848143
YDR373W	0.884982	1.27798	1.44407		YDR371W	0.373114	0.311688	0.835371
YDR374W-A	0.336998	0.350944	1.04138		YDR372C	0.506728	0.644772	1.27242
YDR375C	0.565045	0.664555	1.17611		YDR373W	0.884982	0.888379	1.00384
YDR376W	0.223403	0.323478	1.44795		YDR374W-A	0.336998	0.29699	0.881283
YDR377W	1.22203	1.47456	1.20665		YDR375C	0.565045	0.37214	0.658602
YDR378C	0.517754	0.450303	0.869724		YDR376W	0.223403	0.187774	0.840518
YDR379C-A	0.207417	0.388495	1.87301		YDR377W	1.22203	1.9026	1.55692
YDR379W	0.17106	0.334953	1.9581		YDR378C	0.517754	0.449482	0.868138
YDR380W	0.064363	0.193522	3.00672		YDR379C-A	0.207417	0.321136	1.54826
YDR381C-A	0.337981	0.494326	1.46258		YDR379W	0.17106	0.0931448	0.544516
YDR381W	0.753387	0.954656	1.26715		YDR380W	0.064363	0.112496	1.74784
YDR382W	1.93444	0.963858	0.498261		YDR381C-A	0.337981	0.425155	1.25792
YDR383C	0.385699	0.672472	1.74352		YDR381W	0.753387	0.384671	0.510589
YDR384C	0.466483	0.903184	1.93616		YDR382W	1.93444	2.28257	1.17996
YDR385W	0.606356	0.64558	1.06469		YDR383C	0.385699	0.320768	0.831653
YDR387C	0.200861	0.239404	1.19189		YDR384C	0.466483	0.249787	0.535468
YDR388W	0.449781	0.60847	1.35281		YDR385W	0.606356	1.17698	1.94106
YDR389W	0.313817	0.597972	1.90548		YDR386W	0.152989	0.053922	0.352456
YDR390C	0.331394	0.444265	1.3406		YDR387C	0.200861	0.113781	0.566469
YDR391C	0.8032	1.34808	1.67838		YDR388W	0.449781	0.572256	1.2723
YDR392W	0.246478	0.499168	2.0252		YDR389W	0.313817	0.276949	0.882517
YDR393W	0.328828	0.34548	1.05064		YDR390C	0.331394	0.263249	0.79437
YDR394W	0.273278	0.381996	1.39783		YDR391C	0.8032	0.791735	0.985725
YDR395W	0.350559	0.329283	0.939309		YDR392W	0.246478	0.213552	0.866411
YDR397C	0.784386	1.12206	1.4305		YDR393W	0.328828	0.212685	0.646798
YDR398W	0.478478	0.773461	1.6165		YDR394W	0.273278	0.27818	1.01794
YDR399W	0.780359	1.4824	1.89963		YDR395W	0.350559	0.317912	0.906873
YDR400W	0.507449	0.685937	1.35174		YDR397C	0.784386	0.953956	1.21618
YDR404C	0.733875	1.31184	1.78755		YDR398W	0.478478	0.370632	0.774607
YDR405W	0.160113	0.305771	1.90972		YDR399W	0.780359	1.37504	1.76207
YDR406W	0.0690408	0.0482255	0.698507		YDR400W	0.507449	0.458133	0.902815
YDR407C	0.625846	0.820348	1.31078		YDR404C	0.733875	0.880749	1.20014
YDR408C	0.542745	0.865982	1.59556		YDR405W	0.160113	0.0870221	0.543505
YDR409W	0.223399	0.330112	1.47768		YDR407C	0.625846	0.454593	0.726366
YDR410C	0.64057	0.904577	1.41214		YDR408C	0.542745	0.962677	1.77372
YDR411C	0.194962	0.272916	1.39984		YDR409W	0.223399	0.092462	0.413887
YDR412W	0.576932	0.630566	1.09296		YDR410C	0.64057	0.591604	0.923559
YDR414C	0.597004	0.622157	1.04213		YDR411C	0.194962	0.188008	0.96433
YDR415C	0.0287133	0.0334273	1.16418		YDR412W	0.576932	0.595824	1.03275
YDR416W	0.399972	0.511752	1.27947		YDR414C	0.597004	0.442198	0.740695
YDR418W	3.98779	3.93218	0.986055		YDR415C	0.0287133	0.0237727	0.827936
YDR419W	0.148904	0.207753	1.39522		YDR416W	0.399972	0.266933	0.66738
YDR420W	0.31059	0.552552	1.77904		YDR418W	3.98779	6.10796	1.53167
YDR421W	0.182891	0.0704073	0.384968		YDR419W	0.148904	0.126302	0.848212
YDR422C	0.361123	0.662015	1.83321		YDR420W	0.31059	0.197728	0.636622
YDR423C	0.289634	0.400708	1.3835		YDR421W	0.182891	0.166431	0.910001
YDR424C	0.386315	0.245823	0.636329		YDR422C	0.361123	0.428378	1.18624
YDR425W	0.341275	0.216398	0.634086		YDR423C	0.289634	0.188741	0.651652
YDR427W	0.580089	0.645809	1.11329		YDR424C	0.386315	0.296898	0.76854
YDR428C	0.711739	0.652963	0.917419		YDR425W	0.341275	0.135619	0.397388
YDR429C	0.426965	0.539347	1.26321		YDR427W	0.580089	0.480977	0.829143
YDR430C	0.494979	0.632751	1.27834		YDR428C	0.711739	0.516699	0.725967
YDR432W	0.125861	0.134795	1.07098		YDR429C	0.426965	0.617059	1.44522
YDR434W	0.581248	0.828578	1.42552		YDR430C	0.494979	0.413314	0.835014
YDR435C	0.518264	0.806705	1.55655		YDR432W	0.125861	0.17996	1.42983
YDR436W	0.307268	0.382593	1.24514		YDR434W	0.581248	0.450038	0.774262
YDR437W	0.217182	0.378471	1.74264		YDR435C	0.518264	0.664265	1.28171
YDR438W	0.0543966	0.155065	2.85064		YDR436W	0.307268	0.202322	0.658455
YDR439W	1.25654	1.64961	1.31282		YDR437W	0.217182	0.117108	0.539218
YDR440W	0.433622	0.490441	1.13103		YDR438W	0.0543966	0.0588243	1.0814
YDR441C	0.442852	0.522087	1.17892		YDR439W	1.25654	0.616768	0.490846
YDR443C	0.337206	0.560908	1.6634		YDR440W	0.433622	0.243973	0.562639
YDR444W	0.67386	0.841696	1.24907		YDR441C	0.442852	0.541484	1.22272
YDR445C	6.69164	13.5372	2.023		YDR443C	0.337206	0.261388	0.77516
YDR447C	2.86645	2.57826	0.89946		YDR444W	0.67386	0.361755	0.53684
YDR448W	0.204564	0.434273	2.12292		YDR445C	6.69164	5.86005	0.875727
YDR449C	1.07125	1.36707	1.27614		YDR447C	2.86645	4.53101	1.5807
YDR450W	1.13984	1.02099	0.89573		YDR448W	0.204564	0.0722851	0.353362
YDR451C	0.307277	0.751394	2.44533		YDR449C	1.07125	0.803865	0.7504
YDR452W	0.480858	0.710067	1.47667		YDR450W	1.13984	1.93916	1.70125
YDR453C	0.0677328	0.143055	2.11205		YDR451C	0.307277	0.179455	0.584019
YDR454C	1.36123	1.60286	1.17751		YDR452W	0.480858	0.642143	1.33541
YDR456W	0.718893	1.01678	1.41436		YDR453C	0.0677328	0.0717455	1.05924
YDR457W	0.372741	0.437565	1.17391		YDR454C	1.36123	2.272	1.66908
YDR458C	0.468856	0.890353	1.89899		YDR456W	0.718893	0.887287	1.23424
YDR459C	0.191484	0.269459	1.40721		YDR457W	0.372741	0.415227	1.11398
YDR460W	0.152286	0.267083	1.75382		YDR458C	0.468856	0.466919	0.995867
YDR461C-A	0.19904	0.16614	0.834707		YDR459C	0.191484	0.16863	0.880648
YDR462W	0.557966	0.930645	1.66792		YDR460W	0.152286	0.127965	0.840294
YDR463W	0.305565	0.554171	1.8136		YDR461C-A	0.19904	0.161803	0.812916
YDR465C	0.404886	0.514317	1.27027		YDR461W	0.357855	0.19315	0.539744
YDR466W	0.173434	0.324551	1.87132		YDR462W	0.557966	0.426746	0.764825
YDR468C	0.360308	0.419592	1.16454		YDR463W	0.305565	0.264171	0.864534
YDR469W	0.503181	1.0318	2.05056		YDR465C	0.404886	0.380116	0.93882
YDR470C	0.490016	0.706999	1.44281		YDR466W	0.173434	0.102398	0.590412
YDR471W	1.85744	1.99249	1.07271		YDR468C	0.360308	0.350256	0.972102
YDR472W	0.740477	0.96809	1.30739		YDR469W	0.503181	0.665697	1.32298
YDR473C	0.27684	0.497516	1.79712		YDR470C	0.490016	0.4213	0.859768
YDR475C	0.286802	0.261445	0.911587		YDR471W	1.85744	2.88189	1.55154
YDR476C	0.362619	0.374245	1.03206		YDR472W	0.740477	0.583542	0.788062
YDR477W	0.357783	0.410332	1.14688		YDR473C	0.27684	0.198156	0.715776
YDR478W	0.505358	0.697475	1.38016		YDR475C	0.286802	0.168034	0.585889
YDR479C	0.221677	0.457676	2.06461		YDR476C	0.362619	0.478175	1.31867
YDR480W	0.285501	0.451928	1.58293		YDR477W	0.357783	0.276876	0.773866
YDR481C	0.368335	0.338399	0.918725		YDR478W	0.505358	0.298172	0.590022
YDR482C	0.219292	0.255181	1.16366		YDR479C	0.221677	0.207578	0.936401
YDR483W	0.648608	0.805479	1.24186		YDR480W	0.285501	0.174694	0.611885
YDR484W	0.454488	0.615698	1.35471		YDR481C	0.368335	0.338039	0.917749
YDR485C	0.236062	0.638774	2.70596		YDR482C	0.219292	0.223108	1.0174
YDR486C	0.235657	0.330667	1.40317		YDR483W	0.648608	1.11836	1.72425
YDR487C	0.662123	0.800046	1.2083		YDR484W	0.454488	0.267027	0.587533
YDR488C	0.291953	0.328205	1.12417		YDR485C	0.236062	0.199986	0.847179
YDR489W	0.513121	0.787768	1.53525		YDR486C	0.235657	0.291477	1.23687
YDR490C	0.508559	0.955332	1.87851		YDR487C	0.662123	1.13939	1.72082
YDR492W	0.534621	0.440557	0.824056		YDR488C	0.291953	0.201819	0.691275
YDR493W	0.757143	0.931996	1.23094		YDR489W	0.513121	0.432046	0.841996
YDR494W	0.476647	0.753427	1.58068		YDR490C	0.508559	0.441882	0.86889
YDR495C	0.143413	0.178128	1.24206		YDR492W	0.534621	0.331978	0.62096
YDR496C	0.260121	0.381346	1.46603		YDR493W	0.757143	0.582608	0.769483
YDR497C	1.48892	3.03075	2.03554		YDR494W	0.476647	0.451203	0.946619
YDR498C	0.181167	0.292549	1.6148		YDR495C	0.143413	0.0741908	0.517323
YDR499W	0.301508	0.879642	2.91748		YDR496C	0.260121	0.21893	0.841646
YDR500C	0.954511	0.669467	0.701372		YDR497C	1.48892	1.98316	1.33195
YDR502C	0.286605	0.246558	0.860269		YDR498C	0.181167	0.112824	0.622759
YDR503C	0.395932	0.481665	1.21653		YDR499W	0.301508	0.320177	1.06192
YDR505C	0.342665	0.41226	1.2031		YDR500C	0.954511	0.939348	0.984115
YDR506C	0.170854	0.176667	1.03402		YDR502C	0.286605	0.24073	0.839936
YDR507C	0.363891	0.678224	1.86381		YDR503C	0.395932	0.277879	0.701836
YDR508C	0.234498	0.505812	2.157		YDR505C	0.342665	0.339876	0.991859
YDR510W	0.543252	0.706075	1.29972		YDR506C	0.170854	0.173112	1.01321
YDR511W	0.51716	0.702123	1.35765		YDR507C	0.363891	0.339871	0.933991
YDR513W	0.76094	0.736953	0.968477		YDR508C	0.234498	0.326593	1.39273
YDR514C	0.316469	0.372704	1.17769		YDR510W	0.543252	0.769167	1.41586
YDR515W	0.212303	0.327794	1.544		YDR511W	0.51716	0.417047	0.806418
YDR516C	0.457049	0.769416	1.68344		YDR513W	0.76094	0.886351	1.16481
YDR517W	0.64735	0.846205	1.30718		YDR514C	0.316469	0.212389	0.67112
YDR518W	0.699163	0.665673	0.9521		YDR515W	0.212303	0.0802002	0.377763
YDR519W	0.630358	1.01607	1.6119		YDR516C	0.457049	0.586038	1.28222
YDR520C	0.150807	0.307982	2.04223		YDR517W	0.64735	0.668966	1.03339
YDR524C	0.690127	1.13989	1.65171		YDR518W	0.699163	0.771053	1.10282
YDR524C-B	2.22053	2.20127	0.991326		YDR519W	0.630358	0.987161	1.56603
YDR525W-A	1.57964	3.18919	2.01893		YDR520C	0.150807	0.0510226	0.338331
YDR527W	0.178972	0.247084	1.38057		YDR524C	0.690127	0.624471	0.904863
YDR528W	0.350081	0.555058	1.58551		YDR524C-B	2.22053	3.93557	1.77236
YDR529C	0.485542	0.614754	1.26612		YDR525W-A	1.57964	2.47911	1.56942
YDR530C	0.229314	0.508222	2.21628		YDR527W	0.178972	0.105359	0.588688
YDR531W	0.442399	0.438189	0.990483		YDR528W	0.350081	0.269148	0.768819
YDR532C	0.564725	1.02194	1.80963		YDR529C	0.485542	0.727314	1.49794
YDR533C	0.481505	0.388536	0.806921		YDR530C	0.229314	0.164275	0.716378
YDR538W	0.46805	0.759727	1.62317		YDR531W	0.442399	0.423973	0.958349
YDR539W	0.278047	0.326999	1.17606		YDR532C	0.564725	0.452653	0.801546
YDR540C	0.167783	0.133376	0.794929		YDR533C	0.481505	0.190939	0.396546
YDR541C	0.381719	0.603052	1.57983		YDR538W	0.46805	0.534297	1.14154
YEL001C	0.566777	0.668703	1.17983		YDR539W	0.278047	0.122944	0.442171
YEL002C	0.762725	0.83952	1.10069		YDR540C	0.167783	0.149031	0.888234
YEL003W	0.803585	0.88338	1.0993		YDR541C	0.381719	0.355181	0.930478
YEL004W	0.995555	1.05355	1.05826		YEL001C	0.566777	0.790313	1.3944
YEL005C	0.313122	0.430164	1.37379		YEL002C	0.762725	0.896617	1.17554
YEL006W	0.302524	0.31447	1.03949		YEL003W	0.803585	0.710988	0.884771
YEL007W	0.70584	0.70194	0.994474		YEL004W	0.995555	0.646866	0.649755
YEL008C-A	0.0405741	0.069906	1.72292		YEL005C	0.313122	0.258222	0.824668
YEL009C	1.15491	1.96186	1.69871		YEL006W	0.302524	0.195559	0.646424
YEL011W	0.260497	0.531765	2.04135		YEL007W	0.70584	0.33767	0.478394
YEL012W	0.262004	0.459674	1.75446		YEL008C-A	0.0405741	0.0416794	1.02724
YEL013W	0.513629	0.524601	1.02136		YEL009C	1.15491	2.59425	2.24628
YEL015W	0.293281	0.476865	1.62597		YEL011W	0.260497	0.384367	1.47552
YEL016C	0.335975	0.554984	1.65186		YEL012W	0.262004	0.293302	1.11946
YEL017C-A	0.841301	0.495414	0.588867		YEL013W	0.513629	0.46928	0.913654
YEL017W	0.335481	0.391546	1.16712		YEL015W	0.293281	0.234458	0.79943
YEL018W	0.416971	0.474979	1.13912		YEL016C	0.335975	0.305537	0.909406
YEL019C	0.0772765	0.176669	2.2862		YEL017C-A	0.841301	1.0825	1.2867
YEL020C	0.0751593	0.15315	2.03767		YEL017W	0.335481	0.298192	0.888849
YEL020C-B	14.5167	10.5979	0.730044		YEL018W	0.416971	0.318135	0.762967
YEL020W-A	0.44971	0.450998	1.00286		YEL019C	0.0772765	0.0417685	0.540507
YEL021W	0.562073	0.731608	1.30162		YEL020C	0.0751593	0.0628593	0.836347
YEL022W	0.367666	0.449984	1.22389		YEL020C-B	14.5167	64.1463	4.41878
YEL023C	0.340767	0.315894	0.92701		YEL020W-A	0.44971	0.482897	1.0738
YEL024W	0.731669	0.995475	1.36055		YEL021W	0.562073	0.658044	1.17074
YEL025C	0.604334	1.17428	1.9431		YEL022W	0.367666	0.337533	0.918045
YEL026W	1.63448	1.0366	0.634206		YEL023C	0.340767	0.137691	0.404061
YEL027W	3.08597	5.13632	1.66441		YEL024W	0.731669	1.06653	1.45766
YEL028W	0.365999	0.594451	1.62419		YEL025C	0.604334	0.528691	0.874833
YEL029C	0.827587	1.22437	1.47944		YEL026W	1.63448	1.8138	1.10971
YEL030W	0.0882262	0.215734	2.44524		YEL027W	3.08597	7.63827	2.47516
YEL031W	0.678578	0.658508	0.970424		YEL028W	0.365999	0.187809	0.513141
YEL032W	0.169313	0.245875	1.45219		YEL029C	0.827587	0.86865	1.04962
YEL034W	1.84467	1.40921	0.763937		YEL030W	0.0882262	0.0496591	0.562861
YEL036C	0.273655	0.350471	1.2807		YEL031W	0.678578	0.987343	1.45502
YEL037C	0.309405	0.394675	1.27559		YEL032W	0.169313	0.162125	0.957543
YEL038W	1.4418	2.09489	1.45297		YEL034W	1.84467	2.94599	1.59703
YEL039C	0.246734	0.432729	1.75383		YEL036C	0.273655	0.206605	0.754986
YEL040W	0.303491	0.388776	1.28101		YEL037C	0.309405	0.284277	0.918787
YEL042W	0.5246	0.821854	1.56663		YEL038W	1.4418	2.08312	1.4448
YEL043W	0.197069	0.316079	1.6039		YEL039C	0.246734	0.26397	1.06986
YEL044W	0.524827	0.833739	1.5886		YEL040W	0.303491	0.440122	1.4502
YEL046C	0.323245	0.395793	1.22444		YEL042W	0.5246	0.726044	1.384
YEL047C	0.624461	0.830161	1.3294		YEL043W	0.197069	0.161918	0.82163
YEL048C	1.03112	1.67887	1.6282		YEL044W	0.524827	0.373887	0.712401
YEL050C	0.65388	0.876362	1.34025		YEL046C	0.323245	0.266052	0.823066
YEL051W	0.686034	0.704623	1.0271		YEL047C	0.624461	0.78115	1.25092
YEL052W	0.459437	0.641943	1.39724		YEL048C	1.03112	0.999195	0.969034
YEL053C	0.703933	0.94233	1.33866		YEL050C	0.65388	0.689746	1.05485
YEL054C	2.94109	2.50238	0.850833		YEL051W	0.686034	1.24471	1.81435
YEL055C	0.821465	0.853777	1.03934		YEL052W	0.459437	0.576375	1.25453
YEL056W	0.382859	0.558181	1.45793		YEL053C	0.703933	0.640059	0.909262
YEL058W	0.686807	0.84392	1.22876		YEL054C	2.94109	4.74161	1.61219
YEL059C-A	0.433406	0.463223	1.0688		YEL055C	0.821465	0.805391	0.980433
YEL060C	0.165997	0.212413	1.27962		YEL056W	0.382859	0.330319	0.86277
YEL061C	0.427071	0.816931	1.91287		YEL058W	0.686807	0.708608	1.03174
YEL062W	0.727077	0.972855	1.33804		YEL059C-A	0.433406	0.4757	1.09758
YEL063C	0.353939	0.65756	1.85783		YEL060C	0.165997	0.236001	1.42172
YEL064C	0.205152	0.261214	1.27327		YEL061C	0.427071	0.166151	0.389048
YEL065W	0.326037	0.622194	1.90835		YEL062W	0.727077	0.467588	0.643106
YEL066W	1.16061	1.47756	1.27309		YEL063C	0.353939	0.292668	0.826888
YEL068C	0.435219	0.453706	1.04248		YEL064C	0.205152	0.106628	0.519751
YEL071W	0.981459	1.07866	1.09904		YEL065W	0.326037	0.282301	0.865854
YEL072W	0.369579	0.520085	1.40724		YEL066W	1.16061	1.27531	1.09883
YEL073C	0.32365	0.764882	2.3633		YEL068C	0.435219	0.361089	0.829671
YER001W	0.888292	0.749345	0.843579		YEL071W	0.981459	0.967215	0.985486
YER002W	0.696554	1.05883	1.5201		YEL072W	0.369579	0.229634	0.62134
YER003C	1.34274	1.55982	1.16167		YEL073C	0.32365	0.358381	1.10731
YER004W	0.590415	0.776833	1.31574		YER001W	0.888292	0.864837	0.973595
YER005W	0.103041	0.109668	1.06432		YER002W	0.696554	0.796436	1.1434
YER006W	0.454314	0.494904	1.08934		YER003C	1.34274	2.34588	1.74709
YER007C-A	0.904815	0.662439	0.732127		YER004W	0.590415	0.663794	1.12428
YER007W	0.294562	0.144123	0.48928		YER005W	0.103041	0.0693391	0.672925
YER008C	0.44574	0.752927	1.68916		YER006W	0.454314	0.445404	0.980388
YER009W	2.79628	2.08266	0.744796		YER007C-A	0.904815	0.685056	0.757123
YER010C	0.231375	0.261701	1.13107		YER007W	0.294562	0.0907981	0.308248
YER011W	0.134622	0.119725	0.889343		YER008C	0.44574	0.591964	1.32805
YER012W	0.448374	0.540263	1.20494		YER009W	2.79628	3.95798	1.41544
YER013W	0.187287	0.36623	1.95545		YER010C	0.231375	0.271826	1.17483
YER014W	0.202996	0.31007	1.52747		YER012W	0.448374	0.497269	1.10905
YER016W	0.472934	0.495594	1.04791		YER013W	0.187287	0.143057	0.763836
YER017C	0.407181	0.54828	1.34652		YER014W	0.202996	0.233942	1.15245
YER018C	0.293573	0.434605	1.4804		YER016W	0.472934	0.372714	0.788089
YER019C-A	1.18597	1.00359	0.846216		YER017C	0.407181	0.275295	0.6761
YER019W	0.388488	0.514902	1.3254		YER018C	0.293573	0.225882	0.769421
YER020W	0.275201	0.42024	1.52703		YER019C-A	1.18597	1.16364	0.981177
YER021W	0.186624	0.182133	0.975939		YER019W	0.388488	0.427532	1.1005
YER022W	0.353288	0.48683	1.378		YER020W	0.275201	0.2168	0.787789
YER023W	0.118182	0.09241	0.781929		YER021W	0.186624	0.163454	0.875848
YER025W	0.835261	1.07173	1.28311		YER022W	0.353288	0.31686	0.896887
YER026C	0.330893	0.544176	1.64457		YER023W	0.118182	0.186197	1.57551
YER027C	0.516587	0.729998	1.41312		YER025W	0.835261	1.11302	1.33254
YER028C	0.130584	0.058834	0.450544		YER026C	0.330893	0.480826	1.45311
YER029C	0.392755	0.56113	1.4287		YER027C	0.516587	0.588222	1.13867
YER030W	0.458614	0.803871	1.75283		YER028C	0.130584	0.0382354	0.292803
YER031C	0.793324	0.785796	0.990511		YER029C	0.392755	0.265746	0.676622
YER032W	0.119229	0.256048	2.14753		YER030W	0.458614	0.851717	1.85716
YER033C	0.172397	0.264426	1.53382		YER031C	0.793324	0.996063	1.25556
YER034W	0.0834835	0.164802	1.97407		YER032W	0.119229	0.103238	0.86588
YER035W	0.189902	0.288764	1.52059		YER033C	0.172397	0.116557	0.676096
YER036C	0.612743	0.62264	1.01615		YER034W	0.0834835	0.0435238	0.521346
YER037W	0.314018	0.280976	0.894778		YER035W	0.189902	0.145629	0.766864
YER038C	0.719811	0.950567	1.32058		YER036C	0.612743	0.894348	1.45958
YER038W-A	0.115879	0.234146	2.02061		YER037W	0.314018	0.303045	0.965059
YER039C-A	0.211028	0.267286	1.26659		YER038C	0.719811	0.571658	0.794178
YER040W	0.332371	0.653159	1.96515		YER038W-A	0.115879	0.11982	1.034
YER041W	0.445972	0.560298	1.25635		YER039C-A	0.211028	0.118158	0.559917
YER042W	0.565074	0.629993	1.11489		YER040W	0.332371	0.298821	0.899058
YER043C	1.0949	1.30947	1.19597		YER041W	0.445972	0.359055	0.805107
YER044C	1.06122	1.11771	1.05324		YER042W	0.565074	0.76877	1.36048
YER045C	0.273625	0.240293	0.878183		YER043C	1.0949	2.00744	1.83344
YER046W	0.477265	0.945682	1.98146		YER044C	1.06122	1.22737	1.15657
YER047C	0.293028	0.586795	2.00252		YER045C	0.273625	0.213361	0.779759
YER048C	0.288303	0.433854	1.50486		YER046W	0.477265	0.278547	0.583632
YER048W-A	0.388415	0.394061	1.01454		YER047C	0.293028	0.104233	0.355711
YER049W	0.538327	0.570766	1.06026		YER048C	0.288303	0.491404	1.70447
YER050C	0.444366	0.530814	1.19454		YER048W-A	0.388415	0.587238	1.51188
YER051W	0.240594	0.2713	1.12763		YER049W	0.538327	0.422993	0.785754
YER052C	0.485515	0.595144	1.2258		YER050C	0.444366	0.391173	0.880295
YER053C	0.491803	0.482106	0.980283		YER051W	0.240594	0.102371	0.425493
YER053C-A	0.65842	1.35923	2.06438		YER052C	0.485515	0.59314	1.22167
YER055C	0.985752	1.39199	1.41211		YER053C	0.491803	0.463228	0.941896
YER056C	1.01398	1.5319	1.51077		YER053C-A	0.65842	0.769153	1.16818
YER056C-A	2.35179	2.41908	1.02861		YER055C	0.985752	2.46064	2.49621
YER057C	1.24754	1.34441	1.07765		YER056C	1.01398	1.15756	1.14159
YER058W	0.389287	0.403461	1.03641		YER056C-A	2.35179	3.12221	1.32759
YER059W	0.257319	0.434359	1.68801		YER057C	1.24754	2.11475	1.69513
YER060W	0.472489	0.393207	0.832205		YER058W	0.389287	0.449535	1.15477
YER061C	0.540006	0.58021	1.07445		YER059W	0.257319	0.186705	0.725576
YER062C	0.264517	0.315439	1.19251		YER060W	0.472489	0.379664	0.803541
YER063W	0.378423	0.61758	1.63198		YER061C	0.540006	0.360729	0.668008
YER064C	0.0883277	0.267042	3.02331		YER062C	0.264517	0.463952	1.75396
YER065C	0.340402	0.509053	1.49545		YER063W	0.378423	0.480214	1.26898
YER066W	0.525023	0.897162	1.7088		YER064C	0.0883277	0.067585	0.765162
YER067W	0.210206	0.338827	1.61188		YER065C	0.340402	0.17765	0.521881
YER068W	0.296032	0.655169	2.21317		YER066W	0.525023	0.281979	0.53708
YER069W	0.306271	0.0350057	0.114297		YER067W	0.210206	0.194414	0.924872
YER070W	0.357207	0.534648	1.49675		YER068W	0.296032	0.234347	0.791628
YER071C	1.27346	2.26715	1.78031		YER069W	0.306271	0.257021	0.839195
YER072W	1.17446	0.705368	0.600588		YER070W	0.357207	0.331165	0.927095
YER073W	0.518143	0.648157	1.25092		YER071C	1.27346	0.757801	0.595073
YER074W	2.08185	1.81718	0.872867		YER072W	1.17446	0.9097	0.774566
YER074W-A	0.376854	0.328196	0.870883		YER073W	0.518143	0.443952	0.856814
YER075C	0.145174	0.211838	1.4592		YER074W	2.08185	3.01271	1.44713
YER076C	0.147469	0.520501	3.52956		YER074W-A	0.376854	0.393023	1.04291
YER078C	0.345281	0.545093	1.5787		YER075C	0.145174	0.0864296	0.595351
YER079W	0.26375	0.407736	1.54592		YER076C	0.147469	0.153847	1.04325
YER080W	0.354294	0.333151	0.940323		YER078C	0.345281	0.352876	1.022
YER081W	1.85253	1.93613	1.04513		YER079W	0.26375	0.172047	0.652313
YER082C	0.238445	0.260951	1.09439		YER080W	0.354294	0.355216	1.0026
YER083C	0.472958	0.603611	1.27625		YER081W	1.85253	0.770615	0.415979
YER084W-A	17.8379	20.9341	1.17357		YER082C	0.238445	0.172707	0.724304
YER086W	0.462735	0.50189	1.08462		YER083C	0.472958	0.623238	1.31774
YER087C-A	0.284536	0.119913	0.421434		YER084W-A	17.8379	30.9579	1.73551
YER087C-B	0.243036	0.21815	0.897604		YER086W	0.462735	0.623645	1.34774
YER087W	0.297751	0.316065	1.06151		YER087C-B	0.243036	0.355088	1.46105
YER088C	0.275899	0.337586	1.22359		YER087W	0.297751	0.223078	0.74921
YER089C	0.371055	0.341913	0.921462		YER088C	0.275899	0.209521	0.759411
YER090W	0.398217	0.608843	1.52892		YER089C	0.371055	0.312669	0.842648
YER091C	0.870122	0.8647	0.993769		YER090W	0.398217	0.570262	1.43204
YER092W	0.49412	1.03482	2.09427		YER091C	0.870122	1.6252	1.86778
YER093C	0.301218	0.374282	1.24256		YER092W	0.49412	0.472515	0.956276
YER093C-A	0.386157	0.485536	1.25736		YER093C	0.301218	0.236504	0.785159
YER094C	0.520781	0.89139	1.71164		YER093C-A	0.386157	0.305079	0.79004
YER095W	0.465055	0.622511	1.33857		YER094C	0.520781	0.637498	1.22412
YER096W	0.406667	0.171561	0.421872		YER095W	0.465055	0.491077	1.05595
YER099C	0.346558	0.494875	1.42797		YER096W	0.406667	0.225466	0.554423
YER100W	0.128933	0.369553	2.86625		YER099C	0.346558	0.276499	0.797843
YER101C	0.178339	0.453382	2.54224		YER100W	0.128933	0.120939	0.937996
YER102W	8.1887	10.4931	1.28142		YER101C	0.178339	0.122075	0.684512
YER103W	0.134856	0.359857	2.66846		YER102W	8.1887	21.499	2.62545
YER104W	0.28644	0.447505	1.5623		YER103W	0.134856	0.179542	1.33136
YER105C	0.284339	0.33685	1.18468		YER104W	0.28644	0.167579	0.585042
YER107C	0.593397	0.945267	1.59297		YER105C	0.284339	0.298201	1.04875
YER110C	0.519601	0.448046	0.862288		YER107C	0.593397	0.503039	0.847727
YER111C	0.0316371	0.120535	3.80993		YER110C	0.519601	0.804366	1.54805
YER112W	0.277347	0.342811	1.23604		YER111C	0.0316371	0.0303057	0.957916
YER113C	0.482186	0.640946	1.32925		YER112W	0.277347	0.262992	0.948241
YER114C	0.554315	0.900975	1.62538		YER113C	0.482186	0.342894	0.711124
YER115C	0.376334	0.403659	1.07261		YER114C	0.554315	0.470869	0.849462
YER116C	0.331432	0.467771	1.41136		YER115C	0.376334	0.316103	0.839954
YER117W	3.94681	4.02637	1.02016		YER116C	0.331432	0.354364	1.06919
YER118C	0.171907	0.20225	1.1765		YER117W	3.94681	5.7177	1.44869
YER119C	0.190983	0.199525	1.04473		YER118C	0.171907	0.139878	0.813681
YER120W	1.00486	1.07671	1.0715		YER119C	0.190983	0.183806	0.962424
YER121W	0.191763	0.457102	2.38368		YER120W	1.00486	1.40904	1.40222
YER122C	0.473805	0.603365	1.27345		YER121W	0.191763	0.120199	0.626808
YER123W	0.466697	0.921985	1.97555		YER122C	0.473805	0.56963	1.20225
YER124C	0.974653	1.41867	1.45556		YER123W	0.466697	0.367642	0.787753
YER125W	0.386435	0.526929	1.36356		YER124C	0.974653	0.949471	0.974163
YER126C	0.289187	0.347918	1.20309		YER125W	0.386435	0.49613	1.28387
YER127W	0.188392	0.311963	1.65593		YER126C	0.289187	0.277309	0.958924
YER128W	0.400218	0.760754	1.90085		YER127W	0.188392	0.184411	0.978871
YER129W	0.310469	0.500022	1.61054		YER128W	0.400218	0.418129	1.04475
YER130C	0.940814	0.690748	0.734203		YER129W	0.310469	0.165205	0.532112
YER131W	1.48841	1.40208	0.942		YER130C	0.940814	0.551259	0.585939
YER132C	0.414011	0.572301	1.38233		YER131W	1.48841	2.49922	1.67912
YER133W	0.720934	0.709801	0.984557		YER132C	0.414011	0.255748	0.617733
YER134C	0.272955	0.407722	1.49373		YER133W	0.720934	0.577086	0.80047
YER136W	0.204431	0.250286	1.2243		YER134C	0.272955	0.336614	1.23322
YER137C	0.512539	0.964418	1.88165		YER136W	0.204431	0.264207	1.2924
YER138W-A	0.00819777	0.00588118	0.717413		YER137C	0.512539	0.462071	0.901534
YER139C	0.268482	0.387476	1.44321		YER139C	0.268482	0.247161	0.920586
YER140W	0.316835	0.417879	1.31892		YER140W	0.316835	0.263012	0.830122
YER141W	0.464233	0.705907	1.52059		YER141W	0.464233	0.668063	1.43907
YER142C	0.824994	0.868121	1.05228		YER142C	0.824994	0.58877	0.713666
YER143W	0.26847	0.360909	1.34432		YER143W	0.26847	0.149935	0.55848
YER144C	0.605469	0.81981	1.35401		YER144C	0.605469	0.369788	0.610746
YER145C	0.264116	0.485822	1.83943		YER145C	0.264116	0.285661	1.08157
YER146W	0.598732	0.501477	0.837565		YER146W	0.598732	0.423591	0.707479
YER147C	0.230667	0.502416	2.1781		YER147C	0.230667	0.206199	0.893924
YER148W	0.687415	0.745426	1.08439		YER148W	0.687415	0.859937	1.25097
YER149C	0.288162	0.407062	1.41262		YER149C	0.288162	0.257755	0.89448
YER150W	0.279315	0.440269	1.57624		YER150W	0.279315	0.283569	1.01523
YER151C	0.156321	0.361921	2.31524		YER151C	0.156321	0.197716	1.26481
YER152C	0.329919	0.415339	1.25891		YER152C	0.329919	0.315766	0.957101
YER153C	0.19295	0.438717	2.27374		YER153C	0.19295	0.107332	0.556268
YER154W	0.181496	0.282622	1.55718		YER154W	0.181496	0.22008	1.21259
YER155C	0.39881	0.865889	2.17118		YER155C	0.39881	0.56308	1.4119
YER156C	0.951481	1.06694	1.12134		YER156C	0.951481	0.889061	0.934397
YER157W	0.201174	0.177539	0.882516		YER157W	0.201174	0.128329	0.637899
YER158C	0.314524	0.0961686	0.30576		YER158C	0.314524	0.162775	0.51753
YER159C	0.338968	0.67222	1.98313		YER159C	0.338968	0.306193	0.90331
YER161C	0.362692	0.602395	1.6609		YER161C	0.362692	0.202349	0.557908
YER162C	0.213607	0.377632	1.76788		YER162C	0.213607	0.102626	0.480441
YER163C	0.468537	0.65527	1.39854		YER163C	0.468537	0.524235	1.11887
YER164W	0.344976	0.621297	1.80099		YER164W	0.344976	0.362695	1.05136
YER165W	1.19675	1.61062	1.34582		YER165W	1.19675	2.10588	1.75966
YER166W	0.543418	0.840338	1.54639		YER166W	0.543418	0.515016	0.947734
YER167W	0.302403	0.315788	1.04426		YER167W	0.302403	0.211946	0.700872
YER168C	0.344118	0.522648	1.51881		YER168C	0.344118	0.230123	0.668732
YER169W	0.178534	0.262665	1.47123		YER169W	0.178534	0.119204	0.66768
YER170W	0.300858	0.462122	1.53601		YER170W	0.300858	0.197683	0.657065
YER171W	0.265801	0.336197	1.26485		YER171W	0.265801	0.212376	0.799003
YER172C	0.359915	0.792337	2.20146		YER172C	0.359915	0.355294	0.98716
YER173W	0.450128	0.681749	1.51457		YER173W	0.450128	0.22541	0.500769
YER174C	0.412057	0.488207	1.1848		YER174C	0.412057	0.367892	0.892819
YER175C	0.127365	0.187868	1.47504		YER175C	0.127365	0.124769	0.979623
YER176W	0.630842	0.805353	1.27663		YER176W	0.630842	0.373984	0.592833
YER177W	0.694463	0.923464	1.32975		YER177W	0.694463	1.06853	1.53864
YER178W	0.303352	0.245916	0.810662		YER178W	0.303352	0.479559	1.58087
YER180C-A	0.464214	0.896891	1.93206		YER180C-A	0.464214	0.727676	1.56755
YER181C	1.05395	2.44624	2.32102		YER181C	1.05395	1.33838	1.26987
YER182W	0.549753	0.797441	1.45055		YER182W	0.549753	0.533164	0.969825
YER183C	0.150973	0.231058	1.53045		YER183C	0.150973	0.253839	1.68135
YER184C	0.349668	0.50201	1.43568		YER184C	0.349668	0.18449	0.527613
YER185W	0.182813	0.348117	1.90422		YER186C	0.222916	0.227465	1.0204
YER186C	0.222916	0.353181	1.58437		YER187W	0.190137	0.0460484	0.242185
YER187W	0.190137	0.142298	0.748399		YER188W	0.304679	0.189108	0.62068
YER188W	0.304679	0.368216	1.20854		YFL001W	0.473132	0.349622	0.738953
YFL001W	0.473132	0.529405	1.11894		YFL002C	0.273744	0.21056	0.769184
YFL002C	0.273744	0.390034	1.42481		YFL004W	0.468569	0.343141	0.732317
YFL004W	0.468569	0.208588	0.44516		YFL005W	0.520324	0.745289	1.43236
YFL005W	0.520324	0.505462	0.971436		YFL007W	0.44505	0.552591	1.24164
YFL007W	0.44505	0.705693	1.58565		YFL008W	0.2583	0.18047	0.698684
YFL008W	0.2583	0.339876	1.31582		YFL009W	0.34654	0.258823	0.746877
YFL009W	0.34654	0.47761	1.37822		YFL010C	0.439108	0.745421	1.69758
YFL010C	0.439108	0.710293	1.61758		YFL011W	1.10585	3.2819	2.96777
YFL011W	1.10585	22.5184	20.363		YFL012W	4.14042	2.04863	0.494788
YFL012W	4.14042	13.5215	3.26573		YFL013C	0.0932971	0.0946112	1.01409
YFL013C	0.0932971	0.269062	2.88393		YFL014W	0.312238	1.18307	3.78899
YFL014W	0.312238	1.22841	3.93421		YFL016C	0.237231	0.216259	0.9116
YFL016C	0.237231	0.50387	2.12397		YFL017C	0.644429	0.66666	1.0345
YFL017C	0.644429	1.10929	1.72135		YFL017W-A	0.34152	0.238997	0.699805
YFL017W-A	0.34152	0.279151	0.81738		YFL018C	0.214168	0.246441	1.15069
YFL018C	0.214168	0.233872	1.09201		YFL021W	0.0516443	0.289785	5.61118
YFL021W	0.0516443	0.168125	3.25545		YFL022C	0.0554729	0.0773643	1.39463
YFL022C	0.0554729	0.0162525	0.292981		YFL023W	0.464893	0.350705	0.754377
YFL023W	0.464893	0.85851	1.84668		YFL024C	0.0649499	0.0154906	0.238501
YFL024C	0.0649499	0.139988	2.15532		YFL025C	0.43448	0.260697	0.600019
YFL025C	0.43448	0.563717	1.29745		YFL026W	0.993952	0.701981	0.706253
YFL026W	0.993952	0.349864	0.351993		YFL027C	0.154691	0.102697	0.663887
YFL027C	0.154691	0.21268	1.37487		YFL028C	0.577222	0.901845	1.56239
YFL028C	0.577222	0.939089	1.62691		YFL029C	0.235019	0.193563	0.823603
YFL029C	0.235019	0.349261	1.48609		YFL030W	0.073496	0.0663606	0.902914
YFL030W	0.073496	0.0784219	1.06702		YFL031W	0.958909	2.49539	2.60232
YFL031W	0.958909	0.890239	0.928387		YFL033C	0.351025	0.260015	0.740731
YFL033C	0.351025	0.471191	1.34233		YFL034C-A	1.43724	1.08262	0.753263
YFL034C-A	1.43724	1.79972	1.2522		YFL034C-B	0.111544	0.0561403	0.503301
YFL034C-B	0.111544	0.153409	1.37532		YFL034W	0.374257	0.249315	0.66616
YFL034W	0.374257	0.823249	2.19969		YFL036W	0.59308	0.573602	0.967158
YFL036W	0.59308	0.887018	1.49561		YFL037W	0.665749	0.743724	1.11712
YFL037W	0.665749	0.644139	0.967541		YFL038C	0.426682	0.552466	1.29479
YFL038C	0.426682	0.567884	1.33093		YFL039C	0.82362	1.47491	1.79076
YFL039C	0.82362	0.885758	1.07545		YFL041W	0.341348	0.455594	1.33469
YFL041W	0.341348	0.371117	1.08721		YFL041W-A	0.409797	0.239693	0.584906
YFL041W-A	0.409797	0.614726	1.50007		YFL042C	0.225697	0.141707	0.627862
YFL042C	0.225697	0.418554	1.8545		YFL044C	0.630676	0.762957	1.20975
YFL044C	0.630676	0.716685	1.13638		YFL045C	2.28115	2.34795	1.02928
YFL045C	2.28115	2.11808	0.92851		YFL046W	0.39746	0.445689	1.12134
YFL046W	0.39746	0.449236	1.13027		YFL047W	0.619986	0.648374	1.04579
YFL047W	0.619986	0.829836	1.33847		YFL048C	0.16432	0.169511	1.0316
YFL048C	0.16432	0.182455	1.11037		YFL049W	0.28497	0.172259	0.604482
YFL049W	0.28497	0.63454	2.22669		YFL050C	0.214648	0.18356	0.855166
YFL050C	0.214648	0.472727	2.20233		YFL054C	0.104444	0.0982197	0.940404
YFL054C	0.104444	0.229457	2.19693		YFL064C	2.00324	0.871853	0.435222
YFL064C	2.00324	4.45127	2.22204		YFR001W	0.863126	1.22839	1.42319
YFR001W	0.863126	1.20774	1.39926		YFR002W	0.511756	0.492332	0.962044
YFR002W	0.511756	0.742746	1.45137		YFR003C	0.358207	0.314678	0.878482
YFR003C	0.358207	0.435658	1.21622		YFR004W	0.890755	0.929385	1.04337
YFR004W	0.890755	1.19044	1.33644		YFR005C	0.403597	0.231379	0.573292
YFR005C	0.403597	0.437507	1.08402		YFR007W	0.491522	0.506055	1.02957
YFR007W	0.491522	0.59738	1.21537		YFR008W	0.300653	0.30304	1.00794
YFR008W	0.300653	0.524611	1.7449		YFR009W	0.282529	0.399331	1.41342
YFR009W	0.282529	0.414635	1.46759		YFR010W	0.357887	0.322047	0.899856
YFR010W	0.357887	0.517729	1.44663		YFR011C	0.778309	1.259	1.61761
YFR011C	0.778309	0.977896	1.25644		YFR013W	0.204655	0.183779	0.897998
YFR013W	0.204655	0.318456	1.55607		YFR014C	0.234136	0.132338	0.56522
YFR014C	0.234136	0.138973	0.593558		YFR015C	0.137989	0.199976	1.44921
YFR015C	0.137989	0.283109	2.05167		YFR016C	0.308918	0.305075	0.98756
YFR016C	0.308918	0.55412	1.79374		YFR017C	0.100666	0.190623	1.89363
YFR017C	0.100666	0.477905	4.74746		YFR018C	0.935659	0.907665	0.970081
YFR018C	0.935659	1.87521	2.00416		YFR019W	0.275562	0.191794	0.696011
YFR019W	0.275562	0.512238	1.85889		YFR020W	0.187749	0.193185	1.02895
YFR020W	0.187749	0.442866	2.35882		YFR021W	0.383653	0.335843	0.875381
YFR021W	0.383653	0.537059	1.39986		YFR022W	0.544284	0.427559	0.785543
YFR022W	0.544284	0.824003	1.51392		YFR024C-A	0.107671	0.0966744	0.897872
YFR024C-A	0.107671	0.16966	1.57573		YFR025C	0.0875685	0.097201	1.11
YFR025C	0.0875685	0.112578	1.2856		YFR027W	0.202378	0.12583	0.621755
YFR027W	0.202378	0.559833	2.76628		YFR028C	0.111575	0.0907047	0.812951
YFR028C	0.111575	0.238082	2.13384		YFR029W	0.160012	0.0925047	0.578113
YFR029W	0.160012	0.277172	1.7322		YFR030W	0.317172	0.258323	0.814457
YFR030W	0.317172	0.356599	1.12431		YFR031C	0.213629	0.207205	0.969931
YFR031C	0.213629	0.409034	1.9147		YFR031C-A	0.895704	1.75706	1.96165
YFR031C-A	0.895704	0.804723	0.898425		YFR032C-A	2.02581	1.32806	0.655572
YFR032C-A	2.02581	1.10776	0.546823		YFR033C	0.232561	0.282572	1.21505
YFR033C	0.232561	0.306513	1.31799		YFR034C	0.598826	0.349492	0.58363
YFR034C	0.598826	1.16221	1.94081		YFR034W-A	0.0322736	0.0466043	1.44404
YFR034W-A	0.0322736	0.131489	4.0742		YFR036W	0.248776	0.212668	0.85486
YFR035C	0.308546	0.48295	1.56524		YFR037C	0.580149	0.468851	0.808156
YFR036W	0.248776	0.425935	1.71212		YFR038W	0.499964	0.431979	0.864021
YFR037C	0.580149	0.723784	1.24758		YFR039C	0.227125	0.19468	0.857146
YFR038W	0.499964	0.675952	1.352		YFR040W	0.275113	0.0959199	0.348657
YFR039C	0.227125	0.339306	1.49392		YFR041C	0.445848	0.289368	0.64903
YFR040W	0.275113	0.360406	1.31003		YFR042W	0.638768	0.623168	0.975577
YFR041C	0.445848	0.535094	1.20017		YFR043C	0.0970684	0.067665	0.697086
YFR042W	0.638768	0.863139	1.35126		YFR044C	0.548021	0.891585	1.62692
YFR043C	0.0970684	0.11176	1.15135		YFR045W	0.53659	0.422861	0.788052
YFR044C	0.548021	0.537357	0.980541		YFR046C	0.192775	0.131182	0.680492
YFR045W	0.53659	0.647321	1.20636		YFR047C	0.179093	0.362654	2.02495
YFR046C	0.192775	0.279106	1.44783		YFR048W	0.36957	0.242664	0.656611
YFR047C	0.179093	0.344527	1.92373		YFR049W	0.373755	0.46777	1.25154
YFR048W	0.36957	0.490337	1.32677		YFR050C	0.526806	0.503776	0.956284
YFR049W	0.373755	0.38389	1.02712		YFR051C	0.611695	0.56747	0.927702
YFR050C	0.526806	0.622683	1.182		YFR052W	1.32055	1.51956	1.15071
YFR051C	0.611695	0.835212	1.36541		YFR053C	0.489447	1.02832	2.10099
YFR052W	1.32055	1.71198	1.29642		YFR055W	0.344327	0.361751	1.0506
YFR053C	0.489447	1.02217	2.08842		YGL001C	0.470733	0.558744	1.18697
YFR055W	0.344327	0.483403	1.4039		YGL002W	0.825247	0.982736	1.19084
YGL001C	0.470733	0.557011	1.18328		YGL003C	0.30051	0.158604	0.527784
YGL002W	0.825247	1.35499	1.64192		YGL004C	0.563929	0.319345	0.566287
YGL003C	0.30051	0.543606	1.80895		YGL005C	0.344594	0.301283	0.874311
YGL004C	0.563929	0.571405	1.01326		YGL006W	0.323878	0.243147	0.750736
YGL005C	0.344594	0.485347	1.40846		YGL007C-A	0.298801	0.31839	1.06556
YGL006W	0.323878	0.388149	1.19844		YGL008C	0.927335	1.31263	1.41548
YGL007C-A	0.298801	0.500857	1.67623		YGL009C	0.760879	0.854682	1.12328
YGL008C	0.927335	0.67328	0.726038		YGL010W	0.392943	0.300668	0.76517
YGL009C	0.760879	0.829011	1.08954		YGL011C	0.788877	1.01262	1.28363
YGL010W	0.392943	0.720567	1.83377		YGL012W	0.688712	0.982708	1.42688
YGL011C	0.788877	1.0342	1.31098		YGL013C	0.26094	0.160241	0.614091
YGL012W	0.688712	0.778186	1.12992		YGL014W	0.310381	0.320591	1.0329
YGL013C	0.26094	0.351455	1.34688		YGL016W	0.451835	0.491635	1.08809
YGL014W	0.310381	0.356118	1.14736		YGL017W	0.614793	0.45398	0.738427
YGL016W	0.451835	0.390612	0.864501		YGL018C	0.232023	0.349207	1.50505
YGL017W	0.614793	0.709225	1.1536		YGL019W	0.601377	0.957739	1.59258
YGL018C	0.232023	0.505705	2.17955		YGL020C	1.24061	0.932338	0.751517
YGL019W	0.601377	1.04997	1.74595		YGL021W	0.15055	0.147152	0.977427
YGL020C	1.24061	1.61947	1.30539		YGL022W	0.0760405	0.0807799	1.06233
YGL021W	0.15055	0.243309	1.61613		YGL023C	0.505548	0.534946	1.05815
YGL022W	0.0760405	0.0948067	1.24679		YGL025C	0.212363	0.123733	0.582648
YGL023C	0.505548	0.842432	1.66637		YGL026C	0.348615	0.609484	1.7483
YGL025C	0.212363	0.278194	1.30999		YGL027C	0.792506	1.11861	1.41149
YGL026C	0.348615	0.492002	1.41131		YGL028C	0.332536	0.350844	1.05505
YGL027C	0.792506	0.90057	1.13636		YGL029W	0.295562	0.367506	1.24342
YGL028C	0.332536	0.672589	2.0226		YGL030W	0.728994	0.577607	0.792334
YGL029W	0.295562	0.435565	1.47369		YGL031C	1.13802	1.71622	1.50808
YGL030W	0.728994	0.642956	0.881977		YGL032C	0.388824	0.357745	0.920069
YGL031C	1.13802	0.854486	0.750854		YGL035C	0.198511	0.121039	0.609733
YGL032C	0.388824	0.0689185	0.177249		YGL036W	0.185478	0.0964658	0.520093
YGL035C	0.198511	0.362963	1.82843		YGL037C	0.522545	0.562539	1.07654
YGL036W	0.185478	0.344722	1.85856		YGL038C	0.26697	0.1645	0.616174
YGL037C	0.522545	0.730318	1.39762		YGL039W	0.340568	0.243751	0.715718
YGL038C	0.26697	0.307169	1.15057		YGL040C	0.261437	0.315778	1.20785
YGL039W	0.340568	0.377958	1.10979		YGL041W-A	0.300123	0.23853	0.794776
YGL040C	0.261437	0.302668	1.15771		YGL043W	0.453934	0.690923	1.52208
YGL041W-A	0.300123	0.367874	1.22575		YGL044C	0.178291	0.140629	0.788761
YGL043W	0.453934	0.661505	1.45727		YGL045W	0.0699578	0.0263062	0.37603
YGL044C	0.178291	0.300492	1.6854		YGL047W	0.360052	0.416254	1.1561
YGL045W	0.0699578	0.143873	2.05657		YGL048C	0.864727	1.1384	1.31648
YGL047W	0.360052	0.397988	1.10536		YGL049C	0.138849	0.166458	1.19884
YGL048C	0.864727	1.14748	1.32698		YGL050W	0.574371	0.680947	1.18555
YGL049C	0.138849	0.105633	0.76078		YGL051W	0.1361	0.055178	0.405424
YGL050W	0.574371	0.704813	1.2271		YGL053W	0.293676	0.170463	0.580447
YGL051W	0.1361	0.148637	1.09212		YGL054C	0.656244	1.36117	2.07417
YGL053W	0.293676	0.361485	1.2309		YGL055W	0.694849	0.791715	1.13941
YGL054C	0.656244	1.21781	1.85573		YGL056C	0.228962	0.0966609	0.42217
YGL055W	0.694849	0.680098	0.978771		YGL057C	0.457989	0.288078	0.629008
YGL056C	0.228962	0.338268	1.4774		YGL058W	0.38922	0.438963	1.1278
YGL057C	0.457989	0.456283	0.996276		YGL059W	0.545588	0.249166	0.456692
YGL058W	0.38922	0.552903	1.42054		YGL060W	0.395526	0.250675	0.633776
YGL059W	0.545588	0.71051	1.30228		YGL061C	0.392809	0.259976	0.661837
YGL060W	0.395526	0.336296	0.85025		YGL062W	0.220857	0.226895	1.02734
YGL061C	0.392809	0.555931	1.41527		YGL063W	0.216953	0.139017	0.64077
YGL062W	0.220857	0.303433	1.37389		YGL064C	0.0514444	0.0500837	0.973551
YGL063W	0.216953	0.440399	2.02993		YGL065C	0.501467	0.44169	0.880796
YGL064C	0.0514444	0.109215	2.12296		YGL066W	0.368693	0.172272	0.467251
YGL065C	0.501467	0.517706	1.03238		YGL067W	0.570851	0.668461	1.17099
YGL066W	0.368693	0.596344	1.61746		YGL068W	0.610221	0.724923	1.18797
YGL067W	0.570851	0.725134	1.27027		YGL070C	0.308288	0.309398	1.0036
YGL068W	0.610221	0.634293	1.03945		YGL071W	0.308122	0.251198	0.815255
YGL070C	0.308288	0.482631	1.56552		YGL073W	0.254348	0.108018	0.424687
YGL071W	0.308122	0.550417	1.78636		YGL075C	0.159895	0.124319	0.777505
YGL073W	0.254348	0.382309	1.50309		YGL076C	2.65606	3.07548	1.15791
YGL075C	0.159895	0.244742	1.53064		YGL077C	0.560131	0.649369	1.15932
YGL076C	2.65606	1.77611	0.668699		YGL078C	0.304839	0.288697	0.947047
YGL077C	0.560131	0.625061	1.11592		YGL079W	0.690284	0.719639	1.04253
YGL078C	0.304839	0.328217	1.07669		YGL080W	0.275647	0.307653	1.11611
YGL079W	0.690284	0.952458	1.37981		YGL082W	0.124531	0.119491	0.959536
YGL080W	0.275647	0.34482	1.25095		YGL083W	0.256271	0.238294	0.929852
YGL082W	0.124531	0.184099	1.47834		YGL084C	0.277624	0.165866	0.597446
YGL083W	0.256271	0.286132	1.11652		YGL085W	0.204402	0.166524	0.814687
YGL084C	0.277624	0.291974	1.05169		YGL087C	0.552164	0.770639	1.39567
YGL085W	0.204402	0.359233	1.75748		YGL089C	0.708707	1.66381	2.34767
YGL087C	0.552164	0.708081	1.28238		YGL090W	0.687104	0.519966	0.75675
YGL089C	0.708707	0.611526	0.862875		YGL091C	0.579771	0.390116	0.67288
YGL090W	0.687104	1.04093	1.51496		YGL092W	0.350555	0.296398	0.84551
YGL091C	0.579771	0.822083	1.41795		YGL093W	0.362753	0.287086	0.791409
YGL092W	0.350555	0.447696	1.27711		YGL094C	0.206601	0.214094	1.03627
YGL093W	0.362753	0.679109	1.8721		YGL095C	0.677065	0.602498	0.889868
YGL094C	0.206601	0.292475	1.41565		YGL097W	0.335618	0.277605	0.827146
YGL095C	0.677065	0.950962	1.40454		YGL098W	4.93315	1.50362	0.304799
YGL097W	0.335618	0.344324	1.02594		YGL099W	0.3126	0.285913	0.914629
YGL098W	4.93315	1.95867	0.397042		YGL100W	0.488477	0.60466	1.23785
YGL099W	0.3126	0.261148	0.835406		YGL101W	0.549714	0.437469	0.795812
YGL100W	0.488477	0.642698	1.31572		YGL103W	2.60559	3.14029	1.20521
YGL101W	0.549714	0.613686	1.11637		YGL104C	0.476141	0.253961	0.533373
YGL103W	2.60559	2.25822	0.866682		YGL105W	0.898697	1.41364	1.57299
YGL104C	0.476141	0.616964	1.29576		YGL106W	0.370248	0.540923	1.46097
YGL105W	0.898697	1.05413	1.17296		YGL107C	0.40844	0.368095	0.901221
YGL106W	0.370248	0.482681	1.30367		YGL108C	0.115962	0.0675761	0.582746
YGL107C	0.40844	0.613561	1.5022		YGL110C	0.262133	0.11915	0.454541
YGL108C	0.115962	0.176359	1.52084		YGL111W	0.362053	0.375808	1.03799
YGL110C	0.262133	0.24138	0.92083		YGL112C	0.364158	0.331328	0.909845
YGL111W	0.362053	0.469995	1.29814		YGL113W	0.240726	0.130399	0.541689
YGL112C	0.364158	0.410806	1.1281		YGL114W	0.262817	0.280892	1.06877
YGL113W	0.240726	0.318905	1.32476		YGL115W	0.468506	0.426198	0.909695
YGL114W	0.262817	0.603202	2.29514		YGL116W	0.154492	0.0778345	0.503811
YGL115W	0.468506	0.551576	1.17731		YGL117W	0.379033	0.462258	1.21957
YGL116W	0.154492	0.282407	1.82798		YGL118C	1.73358	0.345498	0.199297
YGL117W	0.379033	0.732695	1.93306		YGL119W	0.382552	0.348073	0.909871
YGL118C	1.73358	1.34053	0.773269		YGL120C	0.693546	0.955041	1.37704
YGL119W	0.382552	0.470515	1.22994		YGL121C	0.507056	0.625397	1.23339
YGL120C	0.693546	1.35449	1.95299		YGL122C	0.48565	0.690001	1.42078
YGL121C	0.507056	0.874653	1.72496		YGL123W	3.79286	7.46815	1.969
YGL122C	0.48565	0.744086	1.53214		YGL124C	0.0994658	0.0727195	0.731101
YGL123W	3.79286	4.71412	1.24289		YGL125W	0.313459	0.455448	1.45298
YGL124C	0.0994658	0.229516	2.30748		YGL126W	0.512349	0.603714	1.17833
YGL125W	0.313459	0.766667	2.44583		YGL127C	0.170425	0.194479	1.14114
YGL126W	0.512349	0.77575	1.5141		YGL128C	0.110325	0.111704	1.0125
YGL127C	0.170425	0.227565	1.33527		YGL129C	0.246084	0.296613	1.20534
YGL128C	0.110325	0.358905	3.25316		YGL130W	0.465997	0.418938	0.899015
YGL129C	0.246084	0.390785	1.58802		YGL131C	0.250134	0.160886	0.643197
YGL130W	0.465997	0.735126	1.57753		YGL133W	0.296231	0.223295	0.753788
YGL131C	0.250134	0.326707	1.30613		YGL134W	0.207846	0.160078	0.770175
YGL133W	0.296231	0.451873	1.52541		YGL135W	3.49689	8.60826	2.46169
YGL134W	0.207846	0.42011	2.02125		YGL136C	0.400718	0.314325	0.784405
YGL135W	3.49689	4.43893	1.26939		YGL137W	0.425174	0.649188	1.52688
YGL136C	0.400718	0.52512	1.31045		YGL139W	0.253812	0.177229	0.69827
YGL137W	0.425174	0.549129	1.29154		YGL140C	0.471509	0.528871	1.12166
YGL139W	0.253812	0.270483	1.06568		YGL141W	0.384997	0.244087	0.633998
YGL140C	0.471509	0.66387	1.40797		YGL142C	0.281002	0.359569	1.27959
YGL141W	0.384997	0.370364	0.961992		YGL143C	0.284469	0.239886	0.843276
YGL142C	0.281002	0.434551	1.54643		YGL144C	0.361027	0.252137	0.698388
YGL143C	0.284469	0.286153	1.00592		YGL145W	0.640097	0.44631	0.697254
YGL144C	0.361027	0.57033	1.57974		YGL147C	6.54269	8.57876	1.3112
YGL145W	0.640097	0.927455	1.44893		YGL148W	0.586959	0.864998	1.47369
YGL147C	6.54269	5.25451	0.803112		YGL150C	0.613868	0.668011	1.0882
YGL148W	0.586959	0.660177	1.12474		YGL151W	0.263937	0.141196	0.534963
YGL150C	0.613868	1.16752	1.9019		YGL153W	0.570613	0.554281	0.971377
YGL151W	0.263937	0.338426	1.28222		YGL154C	0.392516	0.658334	1.67722
YGL153W	0.570613	0.655252	1.14833		YGL155W	0.109836	0.235863	2.14742
YGL154C	0.392516	1.14084	2.90649		YGL156W	0.321433	0.355317	1.10541
YGL155W	0.109836	0.328018	2.98644		YGL157W	0.492121	0.740818	1.50536
YGL156W	0.321433	0.671935	2.09043		YGL159W	0.327113	0.319652	0.977191
YGL157W	0.492121	0.677729	1.37716		YGL160W	0.331248	0.274228	0.827863
YGL159W	0.327113	0.292701	0.8948		YGL161C	0.586592	0.650949	1.10971
YGL160W	0.331248	0.422579	1.27572		YGL162W	0.19924	0.119301	0.598778
YGL161C	0.586592	0.946741	1.61397		YGL163C	0.119408	0.0552611	0.462792
YGL162W	0.19924	0.360654	1.81014		YGL164C	0.45003	0.303997	0.675505
YGL163C	0.119408	0.221675	1.85645		YGL166W	0.369132	0.32526	0.881148
YGL164C	0.45003	0.729209	1.62036		YGL167C	0.421482	0.536626	1.27319
YGL166W	0.369132	0.535381	1.45038		YGL169W	0.189214	0.145645	0.769733
YGL167C	0.421482	0.585733	1.3897		YGL171W	0.272075	0.200035	0.73522
YGL169W	0.189214	0.242258	1.28034		YGL172W	0.852619	0.737199	0.864629
YGL171W	0.272075	0.275396	1.01221		YGL173C	0.34792	6.30557	18.1236
YGL172W	0.852619	1.08588	1.27358		YGL174W	0.176112	0.113425	0.644053
YGL173C	0.34792	0.48546	1.39532		YGL175C	0.312813	0.281216	0.898991
YGL174W	0.176112	0.261496	1.48483		YGL176C	0.155912	0.0900879	0.577812
YGL175C	0.312813	0.483306	1.54503		YGL178W	0.0610547	0.0571928	0.936748
YGL176C	0.155912	0.117549	0.753943		YGL179C	0.435327	0.619323	1.42266
YGL178W	0.0610547	0.0876032	1.43483		YGL180W	0.307712	0.193955	0.630313
YGL179C	0.435327	1.54271	3.5438		YGL181W	0.563053	0.46752	0.83033
YGL180W	0.307712	0.541621	1.76015		YGL184C	0.150667	0.14846	0.985351
YGL181W	0.563053	0.833289	1.47995		YGL185C	0.184662	0.198062	1.07257
YGL184C	0.150667	0.329419	2.1864		YGL186C	0.416614	0.289067	0.693848
YGL185C	0.184662	0.215229	1.16553		YGL187C	0.816565	1.03719	1.27019
YGL186C	0.416614	0.505185	1.2126		YGL189C	4.24361	8.17377	1.92614
YGL187C	0.816565	0.887809	1.08725		YGL190C	0.433443	0.391384	0.902966
YGL189C	4.24361	4.32625	1.01947		YGL191W	0.487	0.646224	1.32695
YGL190C	0.433443	0.674876	1.55701		YGL194C	0.512651	0.235272	0.458932
YGL191W	0.487	0.595223	1.22222		YGL194C-A	0.453786	0.484307	1.06726
YGL194C	0.512651	0.841665	1.64179		YGL195W	0.721954	1.33197	1.84495
YGL194C-A	0.453786	0.738046	1.62642		YGL196W	0.350133	0.20461	0.584379
YGL195W	0.721954	0.970939	1.34488		YGL197W	0.375761	0.232698	0.61927
YGL196W	0.350133	0.233483	0.666842		YGL198W	0.270642	0.298806	1.10407
YGL197W	0.375761	0.414971	1.10435		YGL200C	0.985386	1.32113	1.34072
YGL198W	0.270642	0.279954	1.03441		YGL201C	0.49569	0.369465	0.745354
YGL199C	0.139425	0.266419	1.91084		YGL202W	0.424704	0.638775	1.50405
YGL200C	0.985386	1.11611	1.13267		YGL203C	0.335455	0.2469	0.736017
YGL201C	0.49569	0.59479	1.19992		YGL204C	0.247847	0.210155	0.847922
YGL202W	0.424704	0.461652	1.087		YGL206C	0.573705	0.76717	1.33722
YGL203C	0.335455	0.407761	1.21555		YGL207W	0.505811	0.753925	1.49053
YGL204C	0.247847	0.125795	0.507552		YGL208W	0.252681	0.129331	0.511834
YGL206C	0.573705	0.485284	0.845877		YGL209W	0.177253	0.172951	0.975726
YGL207W	0.505811	0.940062	1.85853		YGL210W	0.354276	0.374603	1.05738
YGL208W	0.252681	0.337135	1.33423		YGL211W	0.28664	0.20366	0.710508
YGL209W	0.177253	0.722731	4.07739		YGL212W	0.440857	0.292021	0.662394
YGL210W	0.354276	0.437786	1.23572		YGL213C	0.548657	0.648215	1.18146
YGL211W	0.28664	0.352238	1.22885		YGL215W	0.210351	0.21428	1.01868
YGL212W	0.440857	0.779694	1.76859		YGL216W	0.277619	0.178061	0.641385
YGL213C	0.548657	0.743918	1.35589		YGL219C	0.263775	0.177955	0.674646
YGL215W	0.210351	0.184236	0.875848		YGL221C	0.613441	0.976077	1.59115
YGL216W	0.277619	0.325012	1.17071		YGL222C	0.291517	0.143579	0.492523
YGL219C	0.263775	0.323032	1.22465		YGL223C	0.116017	0.0913025	0.786974
YGL221C	0.613441	0.837828	1.36578		YGL224C	0.314396	0.275167	0.875224
YGL222C	0.291517	0.63443	2.1763		YGL225W	1.21896	1.57977	1.29599
YGL223C	0.116017	0.281132	2.42319		YGL226C-A	0.379229	0.308235	0.812794
YGL224C	0.314396	0.465999	1.48221		YGL226W	0.57543	0.607207	1.05522
YGL225W	1.21896	1.4202	1.16508		YGL227W	0.251372	0.183441	0.729757
YGL226C-A	0.379229	0.307232	0.810149		YGL228W	0.396725	0.4288	1.08085
YGL226W	0.57543	0.72172	1.25423		YGL229C	0.148979	0.10085	0.676944
YGL227W	0.251372	0.382529	1.52176		YGL231C	0.798624	0.824233	1.03207
YGL228W	0.396725	0.40582	1.02293		YGL232W	0.566034	0.697586	1.23241
YGL229C	0.148979	0.153065	1.02743		YGL233W	0.542386	0.470577	0.867605
YGL231C	0.798624	0.784996	0.982936		YGL234W	0.611674	0.936143	1.53046
YGL232W	0.566034	0.783886	1.38487		YGL236C	0.192126	0.153179	0.797286
YGL233W	0.542386	0.743997	1.37171		YGL237C	0.0549192	0.0355005	0.646414
YGL234W	0.611674	0.966074	1.57939		YGL238W	0.628048	0.509277	0.810888
YGL236C	0.192126	0.222955	1.16046		YGL240W	0.389412	0.29644	0.761251
YGL237C	0.0549192	0.0788826	1.43634		YGL241W	0.273817	0.171979	0.628081
YGL238W	0.628048	0.643913	1.02526		YGL242C	0.263102	0.398212	1.51352
YGL240W	0.389412	0.448531	1.15182		YGL243W	0.252544	0.333368	1.32004
YGL241W	0.273817	0.294506	1.07556		YGL244W	0.848077	0.785678	0.926423
YGL242C	0.263102	0.362845	1.3791		YGL245W	0.684121	1.16818	1.70757
YGL244W	0.848077	1.14861	1.35437		YGL246C	0.45344	0.391617	0.863658
YGL245W	0.684121	0.627768	0.917627		YGL247W	0.484646	0.35465	0.731771
YGL246C	0.45344	0.584588	1.28923		YGL248W	0.268258	0.228699	0.852536
YGL247W	0.484646	0.651112	1.34348		YGL250W	0.411286	0.327754	0.796901
YGL248W	0.268258	0.440509	1.64211		YGL252C	0.610533	0.475188	0.778315
YGL250W	0.411286	0.699476	1.7007		YGL253W	1.95022	3.96773	2.0345
YGL252C	0.610533	0.850076	1.39235		YGL254W	0.188843	0.133832	0.708695
YGL253W	1.95022	1.89785	0.973145		YGL255W	0.783434	0.50081	0.63925
YGL254W	0.188843	0.181025	0.9586		YGL256W	0.830376	0.931409	1.12167
YGL255W	0.783434	0.499813	0.637977		YGL257C	0.479996	0.443093	0.923117
YGL256W	0.830376	1.41099	1.69922		YGL258W	0.448658	2.47473	5.51584
YGL257C	0.479996	0.566316	1.17983		YGR001C	1.09082	1.16217	1.06541
YGL258W	0.448658	2.49514	5.56134		YGR002C	0.364172	0.253542	0.696216
YGR001C	1.09082	1.05356	0.965842		YGR003W	0.356844	0.280849	0.787037
YGR002C	0.364172	0.52461	1.44056		YGR004W	0.16643	0.106852	0.642027
YGR003W	0.356844	0.75682	2.12087		YGR005C	0.482577	0.49666	1.02918
YGR004W	0.16643	0.0800023	0.480696		YGR006W	0.278926	0.196169	0.7033
YGR005C	0.482577	0.684201	1.41781		YGR007W	0.506159	0.533723	1.05446
YGR006W	0.278926	0.369974	1.32642		YGR008C	0.657057	0.756094	1.15073
YGR007W	0.506159	0.692062	1.36728		YGR009C	0.391362	0.31343	0.800869
YGR008C	0.657057	1.01219	1.54049		YGR010W	0.219038	0.209802	0.957835
YGR009C	0.391362	0.655628	1.67525		YGR012W	0.242248	0.227907	0.940801
YGR010W	0.219038	0.327333	1.49442		YGR013W	0.240243	0.120003	0.499506
YGR012W	0.242248	0.268753	1.10941		YGR014W	0.117935	0.118513	1.0049
YGR013W	0.240243	0.234071	0.974309		YGR015C	0.300585	0.155764	0.518203
YGR014W	0.117935	0.182939	1.55118		YGR016W	0.0935445	0.116634	1.24683
YGR015C	0.300585	0.575619	1.915		YGR017W	0.588715	0.341754	0.580508
YGR016W	0.0935445	0.374296	4.00126		YGR018C	0.303816	0.148025	0.48722
YGR017W	0.588715	0.589936	1.00207		YGR019W	0.239262	0.115391	0.482276
YGR018C	0.303816	0.580916	1.91207		YGR020C	0.571606	0.671712	1.17513
YGR019W	0.239262	0.201188	0.840868		YGR021W	0.144441	0.156319	1.08224
YGR020C	0.571606	0.428093	0.748929		YGR023W	0.499697	0.385591	0.77165
YGR021W	0.144441	0.277484	1.92109		YGR024C	1.57386	1.60461	1.01954
YGR023W	0.499697	0.750218	1.50135		YGR026W	0.661751	0.712407	1.07655
YGR024C	1.57386	1.71412	1.08912		YGR027C	4.21585	5.527	1.311
YGR026W	0.661751	0.894195	1.35126		YGR028W	0.312823	0.253355	0.809898
YGR027C	4.21585	3.39677	0.805714		YGR029W	0.287199	0.485479	1.69039
YGR028W	0.312823	0.419117	1.33979		YGR030C	0.2391	0.215629	0.901838
YGR029W	0.287199	0.360905	1.25664		YGR031W	0.250622	0.221799	0.884996
YGR030C	0.2391	0.387769	1.62179		YGR032W	0.68882	0.396657	0.575849
YGR031W	0.250622	0.477957	1.90708		YGR033C	0.445045	0.466946	1.04921
YGR032W	0.68882	2.1487	3.1194		YGR034W	1.2774	1.76365	1.38065
YGR033C	0.445045	0.570247	1.28133		YGR035C	0.13553	0.0324813	0.239661
YGR034W	1.2774	1.14978	0.900091		YGR036C	0.287453	0.145484	0.506114
YGR035C	0.13553	0.127923	0.943872		YGR037C	0.343947	0.469049	1.36372
YGR036C	0.287453	0.322122	1.12061		YGR038W	0.800303	1.06685	1.33306
YGR037C	0.343947	0.247673	0.720089		YGR039W	0.108568	0.08384	0.772234
YGR038W	0.800303	1.54501	1.93053		YGR040W	0.219103	0.0909196	0.414963
YGR039W	0.108568	0.0855822	0.78828		YGR041W	0.512959	0.306049	0.596634
YGR040W	0.219103	0.247915	1.1315		YGR042W	0.352217	0.385294	1.09391
YGR041W	0.512959	0.710052	1.38423		YGR044C	0.549368	0.645469	1.17493
YGR042W	0.352217	0.566806	1.60925		YGR046W	0.214715	0.105597	0.491801
YGR044C	0.549368	0.603926	1.09931		YGR047C	0.479138	0.474868	0.991087
YGR046W	0.214715	0.30207	1.40684		YGR048W	0.271227	0.203241	0.749338
YGR047C	0.479138	0.963875	2.01169		YGR049W	0.245453	0.265323	1.08095
YGR048W	0.271227	0.454077	1.67416		YGR050C	0.103406	0.256675	2.4822
YGR049W	0.245453	0.392462	1.59893		YGR052W	0.652895	0.0902421	0.138218
YGR050C	0.103406	0.558928	5.40517		YGR053C	0.244614	0.206116	0.842616
YGR052W	0.652895	0.515113	0.788967		YGR054W	0.9205	0.976607	1.06095
YGR053C	0.244614	0.431768	1.7651		YGR055W	0.244611	0.195341	0.798577
YGR054W	0.9205	1.19295	1.29598		YGR056W	0.365167	0.26135	0.715699
YGR055W	0.244611	0.302041	1.23478		YGR057C	0.141088	0.154421	1.0945
YGR056W	0.365167	0.75139	2.05766		YGR058W	0.116405	0.0914235	0.785389
YGR057C	0.141088	0.187108	1.32618		YGR060W	1.05123	1.33505	1.26998
YGR058W	0.116405	0.287737	2.47185		YGR061C	0.889723	1.26884	1.42611
YGR060W	1.05123	0.746679	0.710288		YGR062C	0.38884	0.329691	0.847883
YGR061C	0.889723	1.36268	1.53157		YGR063C	1.13858	1.23114	1.0813
YGR062C	0.38884	0.6481	1.66675		YGR065C	0.379084	0.313096	0.82593
YGR063C	1.13858	1.19085	1.0459		YGR068C	0.479195	0.37198	0.77626
YGR065C	0.379084	0.539925	1.42429		YGR070W	0.252997	0.176237	0.696597
YGR068C	0.479195	0.944524	1.97106		YGR071C	0.387309	0.234297	0.604935
YGR070W	0.252997	0.650981	2.57308		YGR072W	0.647364	0.433186	0.669154
YGR071C	0.387309	0.535403	1.38237		YGR074W	0.682706	0.910415	1.33354
YGR072W	0.647364	0.946154	1.46155		YGR075C	0.253261	0.175347	0.692359
YGR074W	0.682706	1.08968	1.59612		YGR076C	0.419035	0.408505	0.974871
YGR075C	0.253261	0.416143	1.64314		YGR077C	0.455572	0.38074	0.835739
YGR076C	0.419035	0.705735	1.68419		YGR078C	0.403697	0.39172	0.970333
YGR077C	0.455572	0.61422	1.34824		YGR080W	0.469005	0.415557	0.88604
YGR078C	0.403697	0.669331	1.658		YGR081C	0.750749	0.681667	0.907983
YGR080W	0.469005	0.667949	1.42418		YGR082W	0.350827	0.559853	1.59581
YGR081C	0.750749	0.869627	1.15835		YGR083C	0.243377	0.199452	0.819521
YGR082W	0.350827	0.485654	1.38431		YGR085C	1.29706	3.07023	2.36707
YGR083C	0.243377	0.36976	1.51929		YGR086C	0.290647	0.424313	1.45989
YGR085C	1.29706	1.80003	1.38778		YGR088W	0.316868	0.239465	0.755726
YGR086C	0.290647	0.387657	1.33377		YGR089W	0.223719	0.0885213	0.39568
YGR088W	0.316868	0.270108	0.85243		YGR090W	0.24035	0.244528	1.01738
YGR089W	0.223719	0.25411	1.13585		YGR091W	0.343509	0.169445	0.493276
YGR090W	0.24035	0.455137	1.89365		YGR092W	0.355423	0.236427	0.665198
YGR091W	0.343509	0.216789	0.631101		YGR093W	0.360695	0.194206	0.538421
YGR092W	0.355423	0.447439	1.25889		YGR095C	0.273587	0.284954	1.04155
YGR093W	0.360695	0.376268	1.04318		YGR096W	0.418201	0.44456	1.06303
YGR095C	0.273587	0.837557	3.0614		YGR097W	0.487425	0.452948	0.929266
YGR096W	0.418201	0.560886	1.34119		YGR098C	0.164789	0.181068	1.09879
YGR097W	0.487425	0.668587	1.37167		YGR099W	0.465844	0.213202	0.457668
YGR098C	0.164789	0.208901	1.26769		YGR100W	0.290509	0.280208	0.964544
YGR099W	0.465844	0.710685	1.52559		YGR101W	0.560535	0.402812	0.718621
YGR100W	0.290509	0.479994	1.65225		YGR102C	0.183375	0.21829	1.1904
YGR101W	0.560535	0.606971	1.08284		YGR103W	0.265042	0.239052	0.901941
YGR102C	0.183375	0.313129	1.70759		YGR104C	0.226882	0.180359	0.794947
YGR103W	0.265042	0.283928	1.07126		YGR105W	0.78002	0.858721	1.10089
YGR104C	0.226882	0.373756	1.64736		YGR106C	0.884526	1.41592	1.60077
YGR105W	0.78002	0.757822	0.971541		YGR107W	0.663898	0.41137	0.619629
YGR106C	0.884526	0.805244	0.910368		YGR108W	0.664304	0.529893	0.797667
YGR107W	0.663898	2.17658	3.27848		YGR110W	0.624419	0.503394	0.80618
YGR108W	0.664304	0.856299	1.28902		YGR111W	0.475055	0.503339	1.05954
YGR110W	0.624419	1.0284	1.64697		YGR112W	0.270093	0.213193	0.789333
YGR111W	0.475055	0.572257	1.20461		YGR113W	0.329067	0.242246	0.736161
YGR112W	0.270093	0.353869	1.31018		YGR116W	0.030774	0.0527924	1.71549
YGR113W	0.329067	0.49272	1.49733		YGR117C	1.18144	1.00181	0.847954
YGR116W	0.030774	0.0533591	1.7339		YGR118W	1.17174	2.32183	1.98152
YGR117C	1.18144	1.75131	1.48236		YGR119C	0.563552	0.43574	0.773203
YGR118W	1.17174	1.13005	0.964416		YGR120C	0.307144	0.2578	0.839345
YGR119C	0.563552	0.803125	1.42511		YGR121C	0.199899	0.136702	0.683856
YGR120C	0.307144	0.342977	1.11666		YGR122W	0.0440244	0.0252802	0.574231
YGR121C	0.199899	0.2905	1.45323		YGR123C	0.85478	0.796688	0.932039
YGR123C	0.85478	1.03073	1.20584		YGR124W	0.250876	0.394744	1.57346
YGR124W	0.250876	0.302662	1.20642		YGR125W	0.311504	0.280296	0.899815
YGR125W	0.311504	0.53562	1.71946		YGR126W	0.162349	0.219178	1.35004
YGR126W	0.162349	0.299148	1.84262		YGR128C	0.530392	0.469701	0.885573
YGR128C	0.530392	0.62695	1.18205		YGR129W	0.308919	0.221643	0.717481
YGR129W	0.308919	0.52608	1.70297		YGR130C	0.23288	0.35226	1.51262
YGR130C	0.23288	0.474495	2.03751		YGR131W	0.436459	0.468021	1.07231
YGR131W	0.436459	1.00932	2.31252		YGR132C	0.556407	0.919796	1.6531
YGR132C	0.556407	1.14634	2.06025		YGR133W	0.360015	0.357147	0.992035
YGR133W	0.360015	0.539614	1.49887		YGR134W	0.323406	0.154142	0.476621
YGR134W	0.323406	0.57163	1.76753		YGR135W	0.490055	0.4663	0.951528
YGR135W	0.490055	0.489498	0.998864		YGR136W	0.164015	0.215898	1.31633
YGR136W	0.164015	0.303687	1.85158		YGR137W	0.00685318	0.00581866	0.849045
YGR138C	0.0748315	0.0562063	0.751105		YGR138C	0.0748315	0.0741565	0.99098
YGR140W	0.500818	0.389512	0.777752		YGR140W	0.500818	0.231289	0.461822
YGR141W	0.582646	1.02201	1.75409		YGR141W	0.582646	0.533115	0.91499
YGR142W	0.23188	0.448508	1.93422		YGR142W	0.23188	0.177158	0.764004
YGR143W	0.297187	0.424408	1.42808		YGR143W	0.297187	0.217586	0.732152
YGR144W	0.506081	0.218559	0.431866		YGR144W	0.506081	0.217967	0.430695
YGR145W	0.214278	0.342871	1.60012		YGR145W	0.214278	0.240813	1.12384
YGR146C	0.394936	0.634031	1.6054		YGR146C	0.394936	0.286521	0.725488
YGR147C	0.276732	0.305834	1.10516		YGR147C	0.276732	0.272575	0.984977
YGR148C	1.72851	1.82949	1.05842		YGR148C	1.72851	2.27792	1.31785
YGR149W	0.165869	0.225987	1.36244		YGR149W	0.165869	0.0975068	0.587853
YGR150C	0.220493	0.353151	1.60165		YGR150C	0.220493	0.202433	0.918095
YGR152C	0.306704	0.394456	1.28611		YGR152C	0.306704	0.2582	0.841853
YGR153W	0.117319	0.133128	1.13476		YGR153W	0.117319	0.0929641	0.792405
YGR154C	0.254475	0.663021	2.60545		YGR154C	0.254475	0.166673	0.654969
YGR155W	0.7018	1.06487	1.51735		YGR155W	0.7018	1.08579	1.54715
YGR156W	0.168143	0.184041	1.09455		YGR156W	0.168143	0.0757557	0.450544
YGR157W	0.38395	0.867881	2.2604		YGR157W	0.38395	0.944685	2.46044
YGR158C	0.351278	0.370622	1.05507		YGR158C	0.351278	0.247615	0.704897
YGR159C	0.724204	1.16704	1.61148		YGR159C	0.724204	1.15874	1.60002
YGR161C	0.132346	0.316199	2.38919		YGR161C	0.132346	0.0745105	0.562998
YGR161W-C	0.335016	0.719506	2.14768		YGR161W-C	0.335016	0.292194	0.872181
YGR162W	0.689674	0.679923	0.985862		YGR162W	0.689674	0.958804	1.39023
YGR163W	0.399329	0.601188	1.50549		YGR163W	0.399329	0.323529	0.810183
YGR165W	0.404591	0.39028	0.96463		YGR165W	0.404591	0.35454	0.876292
YGR166W	0.234289	0.309992	1.32311		YGR166W	0.234289	0.180869	0.77199
YGR167W	0.342309	0.455023	1.32928		YGR167W	0.342309	0.473346	1.3828
YGR168C	0.252712	0.452342	1.78995		YGR168C	0.252712	0.215029	0.850883
YGR169C	0.255065	0.342765	1.34383		YGR169C	0.255065	0.224331	0.879506
YGR169C-A	0.337783	0.719089	2.12885		YGR169C-A	0.337783	0.527033	1.56027
YGR170W	0.28559	0.490281	1.71673		YGR170W	0.28559	0.212377	0.743642
YGR171C	0.384107	0.347495	0.904681		YGR171C	0.384107	0.225236	0.586389
YGR172C	0.758505	0.917026	1.20899		YGR172C	0.758505	1.13482	1.49612
YGR173W	0.674387	1.07447	1.59325		YGR173W	0.674387	0.904207	1.34078
YGR175C	0.387458	0.410704	1.06		YGR175C	0.387458	0.412394	1.06436
YGR177C	0.23174	0.300178	1.29532		YGR177C	0.23174	0.185668	0.801191
YGR178C	0.195777	0.196514	1.00376		YGR178C	0.195777	0.237747	1.21438
YGR179C	0.261759	0.459881	1.75689		YGR179C	0.261759	0.137465	0.525157
YGR180C	0.58722	0.738931	1.25836		YGR180C	0.58722	1.21545	2.06985
YGR181W	0.659822	0.722111	1.0944		YGR181W	0.659822	1.04362	1.58166
YGR183C	0.570799	0.800043	1.40162		YGR183C	0.570799	0.725459	1.27095
YGR184C	0.453509	0.549837	1.21241		YGR184C	0.453509	0.489452	1.07926
YGR185C	0.725951	0.816123	1.12421		YGR185C	0.725951	0.766707	1.05614
YGR186W	0.399308	0.503646	1.2613		YGR186W	0.399308	0.362984	0.909033
YGR187C	0.131487	0.143165	1.08881		YGR187C	0.131487	0.0768589	0.584535
YGR188C	0.386061	0.430926	1.11621		YGR188C	0.386061	0.161328	0.417882
YGR189C	0.545751	0.804281	1.47371		YGR189C	0.545751	0.592293	1.08528
YGR191W	1.3034	2.04673	1.57029		YGR191W	1.3034	1.53355	1.17657
YGR192C	4.32525	3.99978	0.924752		YGR192C	4.32525	8.13865	1.88166
YGR193C	0.482011	0.543477	1.12752		YGR193C	0.482011	0.463777	0.962171
YGR194C	0.392569	0.657403	1.67462		YGR194C	0.392569	0.365708	0.931577
YGR195W	0.568524	0.848238	1.492		YGR195W	0.568524	0.560475	0.985842
YGR196C	0.195204	0.328621	1.68348		YGR196C	0.195204	0.157333	0.805995
YGR197C	0.420456	0.446917	1.06294		YGR197C	0.420456	0.231082	0.549599
YGR198W	0.509096	0.803747	1.57877		YGR198W	0.509096	0.446481	0.877007
YGR199W	0.47842	0.503329	1.05207		YGR199W	0.47842	0.262498	0.548676
YGR200C	0.20155	0.225633	1.11949		YGR200C	0.20155	0.15274	0.757827
YGR202C	0.550642	0.635387	1.1539		YGR202C	0.550642	0.271099	0.492332
YGR203W	0.484296	0.753687	1.55625		YGR203W	0.484296	0.480267	0.991681
YGR204W	0.525032	0.625758	1.19185		YGR204W	0.525032	0.698663	1.33071
YGR205W	0.398396	0.506735	1.27194		YGR205W	0.398396	0.225634	0.566356
YGR206W	1.00939	0.912386	0.903901		YGR206W	1.00939	0.616134	0.610404
[truncated: 3,154 more rows]
