# Supplementary material for: Decapping factor Dcp2 controls mRNA abundance and translation to adjust metabolism and filamentation to nutrient availability
Source: eLife journal article supplement (doi:10.7554/elife.85545), 2023-06-02
Supplement: fig3-data3 [file Figure 3 – source data 3.xlsx]

## Sheet: ChIP-Seq satistics
		S. cerevisiae	S. cerevisiae	S. cerevisiae	S. cerevisiae	S. cerevisiae	S. pombe	S. pombe	S. pombe	S. pombe	S. pombe
Strain	Total paired reads	aligned exactly 1 time	% aligned 1 time	aligned > 1 time	% aligned > 1 time	overall alignment rate	aligned exactly 1 time	% aligned 1 time	aligned > 1 time	% aligned > 1 time	overall alignment rate	Normalization factor from S. pombe spike-in	Mean S. pombe Norm factor for each strain	Normalized S. cere reads	Mean normalized S.cere reads	Relative mean normalized S.cere reads
WT_1	27352234	20497067	74.94	3618010	13.23	88.17	2327731	8.51	339456	1.24	9.75	1.28886	1.4975	2.64178e+07	3.23161e+07	1	WT
WT_2	31768973	24602669	77.44	4416765	13.9	91.35	2057933	6.48	379943	1.2	7.67	1.45783		3.58665e+07
WT_3	25794953	19855382	76.97	3620723	14.04	91.01	1718458	6.66	342106	1.33	7.99	1.74582		3.46639e+07
dcp2_1	27854751	21692299	77.88	3253330	11.68	89.56	2137678	7.67	206685	0.74	8.42	1.40345	1.14621	3.0444e+07	2.63863e+07	0.816507	dcp2
dcp2_2	36225918	27496966	75.9	4169209	11.51	87.42	3552539	9.81	304565	0.84	10.65	0.8445		2.32212e+07
dcp2_3	28105847	21411032	76.18	3383708	12.04	88.22	2519659	8.96	258934	0.92	9.89	1.19068		2.54938e+07
		2.25926e+07
Pearson correlation between Replicates
WT_1 vs WT_2	0.99
WT_2 vs WT_3	0.99
WT_1 vs WT_3	0.99
dcp2_1 vs dcp2_2	0.99
dcp2_2 vs dcp2_3	0.99
dcp2_1 vs dcp2_3	0.99

## Sheet: Spike-in nor Rpb1 occupancy
Gene	Spike-in_log2_Rpb1_Occ_dcp2/WT
YAL068C	-0.292345
YAL067C	-0.907611
YAL064W	-0.506142
YAL063C	-0.17382
YAL062W	-0.408589
YAL060W	-0.235193
YAL059W	-0.314642
YAL058W	-0.246488
YAL056W	-0.320043
YAL055W	-0.0835025
YAL054C	0.142599
YAL053W	0.28181
YAL051W	-0.454928
YAL049C	-0.232677
YAL048C	-0.0750512
YAL047C	-0.191381
YAL046C	0.00337523
YAL044C	-0.189715
YAL043C	-0.125447
YAL042W	-0.143576
YAL041W	-0.212051
YAL040C	0.186955
YAL039C	-0.00717264
YAL038W	-0.318243
YAL036C	-0.282029
YAL035W	-0.208845
YAL034W-A	-0.35299
YAL034C	0.140771
YAL033W	-0.277753
YAL032C	-0.185682
YAL031C	-0.223372
YAL030W	-0.40173
YAL029C	-0.329325
YAL028W	-0.119121
YAL027W	-0.158804
YAL026C	-0.282221
YAL025C	-0.146916
YAL024C	-0.477551
YAL023C	-0.622351
YAL022C	-0.175046
YAL021C	-0.186131
YAL020C	-0.179529
YAL019W	-0.298807
YAL017W	-0.0482409
YAL016W	-0.110626
YAL015C	-0.0365404
YAL014C	-0.00242553
YAL013W	-0.00145865
YAL012W	-0.241097
YAL011W	-0.246039
YAL010C	-0.219357
YAL009W	-0.367739
YAL008W	-0.316629
YAL007C	-0.373179
YAL005C	-0.106952
YAL003W	-0.262888
YAL002W	-0.479588
YAL001C	-0.241735
YAR002W	-0.417971
YAR002C-A	-0.457725
YAR003W	-0.292023
YAR007C	-0.340232
YAR008W	-0.492343
YAR014C	-0.213983
YAR015W	-0.110465
YAR018C	-0.298587
YAR019C	-0.0908208
YAR020C	-0.0448259
YAR027W	0.0817105
YAR031W	-0.399034
YAR033W	-0.240203
YAR035W	-0.169468
YAR042W	-0.267057
YAR050W	-0.0561702
YAR071W	-1.25444
YBL108C-A	-0.155477
YBL106C	-0.496364
YBL105C	-0.335635
YBL103C	-0.160176
YBL102W	-0.121146
YBL101C	-0.230987
YBL099W	-0.034777
YBL098W	-0.642349
YBL097W	-0.354732
YBL093C	-0.319947
YBL092W	-0.0184773
YBL091C-A	-0.458531
YBL091C	-0.107164
YBL090W	-0.152849
YBL089W	-0.275304
YBL088C	-0.391136
YBL087C	-0.120106
YBL085W	-0.398015
YBL084C	-0.213275
YBL082C	-0.315727
YBL080C	-0.389888
YBL079W	-0.317049
YBL078C	0.15541
YBL076C	-0.303497
YBL075C	-0.0737086
YBL074C	-0.172226
YBL072C	0.0419066
YBL071W-A	-0.121133
YBL069W	-0.461439
YBL068W	-0.479242
YBL067C	-0.338347
YBL066C	-0.0678811
YBL064C	0.136473
YBL063W	-0.468447
YBL061C	-0.408855
YBL060W	-0.27681
YBL059C-A	-0.33919
YBL058W	-0.210766
YBL057C	-0.367252
YBL056W	-0.274278
YBL055C	-0.383811
YBL054W	-0.161976
YBL052C	-0.440362
YBL051C	-0.192218
YBL050W	-0.102025
YBL049W	0.0582706
YBL047C	-0.16775
YBL046W	-0.309304
YBL045C	-0.127268
YBL043W	0.579061
YBL042C	0.321745
YBL041W	-0.155992
YBL040C	-0.345176
YBL039C	-0.0233259
YBL038W	-0.0711652
YBL037W	-0.213004
YBL036C	-0.259119
YBL035C	-0.269127
YBL034C	-0.304875
YBL033C	-0.116488
YBL032W	-0.269565
YBL031W	-0.392019
YBL030C	0.00453506
YBL028C	-0.232758
YBL027W	0.0270234
YBL026W	-0.3226
YBL025W	-0.33906
YBL024W	-0.464801
YBL023C	-0.104796
YBL022C	-0.294786
YBL021C	-0.247994
YBL020W	-0.400918
YBL019W	-0.378274
YBL018C	-0.388515
YBL017C	-0.254206
YBL016W	-0.194183
YBL015W	-0.290719
YBL014C	-0.256686
YBL013W	-0.370508
YBL011W	-0.313036
YBL009W	-0.526572
YBL008W	-0.384621
YBL007C	-0.0905677
YBL006C	-0.276209
YBL005W	-0.578952
YBL004W	-0.423827
YBL003C	-0.621038
YBL002W	-0.641507
YBL001C	-0.654106
YBR001C	-0.112798
YBR002C	-0.168939
YBR003W	-0.181541
YBR004C	-0.166305
YBR005W	0.0452062
YBR006W	-0.321112
YBR008C	-0.456269
YBR009C	-0.439146
YBR010W	-0.286549
YBR011C	-0.472745
YBR014C	-0.286256
YBR015C	-0.473845
YBR016W	-0.129994
YBR017C	-0.339846
YBR018C	-0.396796
YBR019C	-0.324582
YBR020W	-0.316938
YBR021W	0.0335863
YBR022W	-0.291214
YBR023C	0.134072
YBR024W	-0.607869
YBR025C	-0.28705
YBR026C	-0.0712427
YBR029C	-0.339065
YBR030W	-0.327279
YBR031W	-0.17869
YBR034C	-0.221915
YBR035C	-0.064993
YBR036C	-0.110417
YBR037C	-0.103609
YBR038W	-0.308062
YBR039W	-0.110924
YBR040W	-0.342566
YBR041W	-0.39609
YBR042C	-0.310076
YBR043C	0.578897
YBR044C	0.559139
YBR045C	-0.555232
YBR046C	-0.0538431
YBR048W	0.0532369
YBR049C	-0.386701
YBR050C	-0.275481
YBR052C	-0.0648987
YBR054W	0.507956
YBR055C	-0.34494
YBR057C	-0.29521
YBR058C	-0.213868
YBR058C-A	-0.0893416
YBR059C	-0.0103344
YBR060C	-0.257938
YBR061C	-0.300342
YBR065C	0.1459
YBR066C	-0.588376
YBR067C	0.54852
YBR068C	0.388153
YBR069C	-0.0231404
YBR070C	-0.62872
YBR072W	0.484803
YBR073W	-0.15378
YBR076W	-0.204898
YBR077C	-0.224845
YBR078W	-0.409003
YBR079C	-0.378636
YBR080C	-0.324221
YBR081C	-0.22086
YBR082C	-0.203359
YBR083W	-0.366577
YBR084W	-0.661937
YBR084C-A	0.0105818
YBR085W	-0.860428
YBR086C	-0.403252
YBR087W	-0.390177
YBR088C	-0.155458
YBR089C-A	-0.468562
YBR091C	-0.0684608
YBR092C	0.212619
YBR093C	-0.350344
YBR094W	-0.510554
YBR095C	-0.309987
YBR097W	-0.372891
YBR098W	-0.547015
YBR101C	-0.188725
YBR102C	-0.199241
YBR103W	-0.275501
YBR104W	-0.3123
YBR105C	0.239733
YBR106W	-0.641357
YBR107C	-0.840564
YBR108W	-0.280075
YBR109C	-0.130972
YBR110W	-0.29926
YBR111C	0.17158
YBR111W-A	-0.384923
YBR112C	-0.476438
YBR114W	-0.353522
YBR115C	0.116624
YBR117C	-0.327375
YBR118W	0.149596
YBR119W	-0.432125
YBR120C	-0.33828
YBR121C	-0.484828
YBR122C	-0.380579
YBR123C	-0.261824
YBR125C	-0.360903
YBR126C	0.385568
YBR127C	-0.139194
YBR128C	-0.179163
YBR129C	-0.306722
YBR130C	-0.369104
YBR131W	-0.275399
YBR132C	0.161671
YBR133C	-0.561535
YBR135W	-0.104681
YBR136W	-0.252056
YBR137W	-0.262645
YBR139W	-0.204266
YBR140C	-0.320324
YBR142W	-0.443351
YBR143C	-0.393466
YBR145W	-0.175377
YBR146W	-0.148024
YBR147W	0.296398
YBR148W	-0.552118
YBR149W	0.292921
YBR150C	-0.190972
YBR151W	-0.182176
YBR152W	-0.361949
YBR153W	-0.368028
YBR154C	-0.506357
YBR155W	-0.446441
YBR156C	-0.387854
YBR157C	-0.925614
YBR158W	-0.298317
YBR159W	-0.33673
YBR160W	0.0511383
YBR161W	-0.434876
YBR162C	-0.329638
YBR162W-A	-0.313214
YBR163W	-0.477222
YBR164C	-0.158941
YBR165W	-0.283811
YBR166C	0.0217503
YBR167C	0.179368
YBR168W	-0.238693
YBR169C	0.347292
YBR170C	-0.297261
YBR171W	-0.576617
YBR172C	-0.291352
YBR173C	-0.445053
YBR175W	-0.381601
YBR176W	-0.471785
YBR177C	-0.274955
YBR179C	-0.321943
YBR180W	-0.697302
YBR181C	0.0742244
YBR182C	-0.393219
YBR183W	0.231341
YBR185C	-0.180761
YBR186W	-0.68176
YBR188C	-0.566374
YBR189W	0.0789918
YBR191W	0.0974877
YBR192W	-0.497486
YBR193C	-0.357571
YBR194W	-0.288872
YBR195C	-0.465727
YBR196C	-0.270482
YBR198C	-0.395724
YBR199W	-0.0705061
YBR200W	-0.135644
YBR201W	-0.470142
YBR202W	-0.237652
YBR203W	0.160151
YBR204C	-0.206007
YBR205W	-0.369818
YBR207W	-0.44721
YBR208C	-0.661261
YBR210W	-0.501363
YBR211C	-0.225779
YBR212W	-0.0456495
YBR213W	-0.328237
YBR214W	0.13735
YBR215W	-0.426504
YBR216C	-0.194159
YBR217W	-0.227324
YBR218C	-0.166453
YBR221C	-0.237099
YBR222C	-0.00477263
YBR223C	-0.141413
YBR227C	-0.195803
YBR228W	-0.306975
YBR229C	-0.176998
YBR230C	0.25258
YBR231C	-0.488889
YBR233W	-0.55881
YBR233W-A	-0.385829
YBR234C	-0.0746912
YBR236C	-0.213076
YBR237W	-0.297943
YBR238C	-0.97616
YBR240C	-0.53302
YBR243C	-0.654759
YBR244W	-0.663862
YBR245C	-0.419326
YBR247C	-0.374636
YBR248C	-0.424058
YBR249C	-0.262491
YBR250W	-0.523268
YBR251W	-0.170162
YBR252W	-0.485876
YBR253W	-0.503435
YBR254C	-0.428892
YBR255W	-0.149442
YBR256C	0.304661
YBR257W	-0.290241
YBR258C	-0.279612
YBR260C	-0.272902
YBR261C	-0.219279
YBR262C	-0.0492341
YBR263W	-0.340797
YBR264C	-0.292174
YBR265W	-0.310567
YBR267W	-0.34897
YBR268W	-0.102824
YBR272C	-0.165872
YBR273C	-0.202509
YBR274W	-0.232755
YBR275C	-0.38551
YBR276C	-0.297438
YBR278W	-0.228189
YBR279W	-0.240971
YBR280C	-0.117842
YBR281C	-0.363274
YBR282W	-0.265668
YBR283C	-0.364774
YBR286W	-0.0150591
YBR288C	0.152884
YBR289W	-0.242085
YBR290W	-0.0688224
YBR291C	0.130938
YBR293W	-0.29245
YBR294W	-0.597546
YBR295W	-0.0291572
YBR296C	-0.435023
YBR297W	0.670751
YBR298C	0.216665
YBR299W	-0.344764
YBR301W	-0.435868
YBR302C	-0.089875
YCL069W	0.185637
YCL064C	0.437001
YCL063W	0.625143
YCL061C	0.687722
YCL059C	0.675825
YCL058C	0.719876
YCL058W-A	0.708832
YCL057W	0.501476
YCL055W	-0.482385
YCL054W	0.410884
YCL052C	0.804504
YCL051W	0.750633
YCL050C	0.398646
YCL048W	0.581644
YCL045C	0.763199
YCL044C	0.539703
YCL043C	0.579543
YCL040W	1.74793
YCL039W	0.882167
YCL038C	0.864428
YCL037C	0.66036
YCL036W	0.413798
YCL035C	1.01146
YCL034W	0.9425
YCL033C	0.940707
YCL032W	0.776235
YCL031C	0.591631
YCL030C	0.49462
YCL029C	0.469347
YCL028W	0.796227
YCL027W	0.608816
YCL026C-A	0.320407
YCL025C	0.827744
YCL024W	0.842256
YCL018W	0.936225
YCL017C	0.833359
YCL016C	0.771496
YCL014W	0.765825
YCL012C	0.801121
YCL011C	0.648928
YCL010C	0.522299
YCL009C	0.933649
YCL008C	0.93177
YCL005W-A	0.849863
YCL005W	0.699177
YCL004W	0.615546
YCL001W	0.679855
YCR002C	0.897328
YCR003W	0.796873
YCR004C	1.09429
YCR005C	0.533027
YCR008W	0.689736
YCR009C	0.851338
YCR010C	1.42831
YCR011C	0.656173
YCR012W	0.662832
YCR014C	0.56007
YCR017C	0.819736
YCR018C	0.763921
YCR019W	0.858922
YCR020C	0.681652
YCR020C-A	0.91087
YCR020W-B	0.68256
YCR021C	1.17364
YCR023C	0.55555
YCR024C	0.77416
YCR024C-A	0.906607
YCR026C	0.928936
YCR027C	0.652566
YCR028C	0.717527
YCR028C-A	0.64285
YCR030C	0.860211
YCR031C	1.00869
YCR032W	0.659603
YCR033W	0.624095
YCR034W	0.35551
YCR035C	0.565927
YCR036W	1.09142
YCR037C	0.53241
YCR038C	0.651344
YCR039C	1.96217
YCR040W	2.80826
YCR042C	0.748753
YCR044C	0.439234
YCR045C	0.582907
YCR046C	0.631448
YCR047C	0.904088
YCR048W	0.714918
YCR052W	0.702207
YCR053W	0.657506
YCR054C	0.646843
YCR057C	0.615795
YCR059C	0.702273
YCR060W	0.838147
YCR063W	0.828483
YCR065W	0.484584
YCR066W	0.542702
YCR067C	0.684759
YCR068W	0.828796
YCR069W	0.725768
YCR071C	0.731824
YCR072C	0.889887
YCR073C	0.871169
YCR073W-A	1.08432
YCR075C	0.576677
YCR077C	0.733253
YCR079W	0.648392
YCR081W	0.625294
YCR082W	0.912299
YCR083W	0.752436
YCR084C	0.624988
YCR086W	0.570092
YCR088W	0.682638
YCR089W	0.713331
YCR091W	0.894066
YCR092C	0.436969
YCR093W	0.531555
YCR094W	0.804401
YCR098C	0.694962
YCR104W	0.368238
YCR105W	0.76551
YCR106W	0.766695
YCR107W	1.13297
YDL248W	0.018274
YDL247W	0.0407675
YDL245C	0.00456372
YDL244W	-0.0150723
YDL243C	0.100952
YDL240W	-0.290397
YDL239C	-0.536549
YDL238C	-0.109138
YDL237W	-0.309691
YDL236W	-0.43867
YDL235C	-0.334635
YDL234C	0.109384
YDL232W	-0.375513
YDL231C	-0.318958
YDL230W	-0.0982646
YDL229W	-0.315813
YDL227C	-1.34768
YDL226C	-0.351623
YDL225W	-0.330947
YDL224C	-0.305972
YDL223C	-0.0407914
YDL222C	0.555588
YDL220C	-0.172214
YDL219W	-0.622079
YDL217C	-0.220508
YDL216C	-0.230123
YDL215C	-0.142566
YDL214C	-0.670655
YDL213C	-0.121577
YDL212W	-0.319909
YDL210W	-0.525656
YDL209C	-0.224394
YDL208W	-0.231032
YDL207W	-0.224554
YDL205C	-0.41913
YDL204W	0.338388
YDL203C	-0.185928
YDL202W	-0.25154
YDL201W	-0.466645
YDL200C	-0.311886
YDL198C	-0.375072
YDL197C	-0.0727766
YDL195W	-0.301838
YDL194W	-0.0689447
YDL193W	-0.500676
YDL192W	-0.285844
YDL191W	-0.0209102
YDL190C	-0.236243
YDL189W	-0.397632
YDL188C	-0.169949
YDL185W	-0.168911
YDL184C	0.0686413
YDL183C	-0.132384
YDL182W	0.0650238
YDL181W	-0.316951
YDL179W	-0.391665
YDL178W	-0.229251
YDL176W	-0.197876
YDL175C	-0.11664
YDL174C	-0.107869
YDL173W	-0.294933
YDL171C	-0.553601
YDL170W	-0.229079
YDL169C	-0.118099
YDL168W	-0.349293
YDL167C	-0.341412
YDL166C	-0.319162
YDL165W	-0.428573
YDL164C	-0.392849
YDL161W	-0.326436
YDL160C	-0.164968
YDL159W	-0.158526
YDL155W	-0.354539
YDL154W	-0.428564
YDL153C	-0.323966
YDL150W	-0.386302
YDL149W	-0.224855
YDL148C	-0.257947
YDL147W	-0.219555
YDL146W	-0.550411
YDL145C	-0.356956
YDL143W	-0.387343
YDL142C	-0.312829
YDL141W	-0.337462
YDL140C	-0.300729
YDL139C	-0.284675
YDL138W	-0.00653969
YDL137W	-0.13156
YDL136W	-0.0530015
YDL135C	-0.310789
YDL134C	-0.0879631
YDL133C-A	0.166745
YDL132W	-0.332731
YDL131W	-0.0353686
YDL130W-A	0.198223
YDL130W	-0.019327
YDL128W	-0.533795
YDL127W	-0.698602
YDL126C	-0.183428
YDL125C	0.105679
YDL124W	0.271685
YDL123W	-0.224477
YDL122W	-0.292463
YDL120W	-0.165019
YDL117W	-0.249842
YDL116W	-0.375237
YDL115C	-0.172469
YDL113C	0.00962817
YDL112W	-0.350298
YDL111C	-0.261196
YDL110C	0.191261
YDL108W	-0.164994
YDL107W	-0.261847
YDL106C	-0.0364524
YDL105W	-0.628332
YDL104C	-0.518845
YDL103C	-0.259828
YDL102W	-0.241086
YDL101C	-0.437472
YDL100C	-0.290525
YDL099W	-0.377902
YDL098C	-0.644856
YDL097C	-0.251914
YDL095W	-0.522615
YDL093W	-0.311994
YDL092W	-0.231729
YDL091C	-0.286122
YDL090C	-0.33036
YDL089W	-0.442272
YDL088C	-0.318746
YDL087C	-0.21302
YDL085W	-0.00555988
YDL084W	-0.373909
YDL083C	-0.0389547
YDL082W	-0.316445
YDL081C	-0.0477794
YDL080C	-0.325801
YDL079C	-0.0649433
YDL078C	0.0754515
YDL077C	-0.230751
YDL076C	-0.00834956
YDL075W	-0.0265886
YDL074C	-0.338274
YDL072C	0.240602
YDL070W	-0.511051
YDL069C	-0.758359
YDL067C	-0.10999
YDL066W	-0.142231
YDL065C	-0.268065
YDL064W	-0.350874
YDL063C	-0.302996
YDL061C	0.0339835
YDL060W	-0.306856
YDL059C	-0.315799
YDL058W	-0.389255
YDL056W	-0.457676
YDL055C	-0.495915
YDL054C	0.00214737
YDL053C	-0.285039
YDL052C	-0.333849
YDL051W	-0.22525
YDL049C	-0.320611
YDL048C	0.0319736
YDL047W	-0.184688
YDL046W	-0.193679
YDL045W-A	-0.0252304
YDL045C	-0.0366018
YDL044C	-0.226662
YDL043C	-0.418025
YDL042C	-0.740778
YDL040C	-0.413539
YDL039C	0.215928
YDL037C	0.132486
YDL036C	-0.518638
YDL035C	-0.191573
YDL033C	-0.029676
YDL031W	-0.157836
YDL030W	-0.324232
YDL029W	-0.171463
YDL028C	-0.237202
YDL025C	0.0592602
YDL024C	-0.362654
YDL022W	0.476119
YDL021W	0.0516087
YDL020C	0.301449
YDL019C	-0.203736
YDL018C	-0.20394
YDL017W	-0.361809
YDL015C	-0.343743
YDL014W	-0.295667
YDL013W	-0.198804
YDL012C	-0.204585
YDL010W	-0.432792
YDL008W	-0.752737
YDL007W	-0.268695
YDL006W	-0.401206
YDL005C	-0.130776
YDL004W	-0.0654819
YDL003W	-0.60918
YDL002C	-0.210953
YDL001W	-0.31866
YDR001C	0.396993
YDR002W	-0.135098
YDR003W	-0.206977
YDR004W	-0.503936
YDR005C	-0.459238
YDR006C	-0.13655
YDR007W	-0.0616896
YDR009W	0.214845
YDR011W	0.287612
YDR012W	-0.198182
YDR013W	-0.436012
YDR014W	-0.265366
YDR014W-A	-0.30086
YDR016C	-0.147513
YDR017C	-0.354365
YDR019C	0.211428
YDR021W	-0.416119
YDR022C	-0.520735
YDR023W	-0.46157
YDR025W	0.0425697
YDR026C	-0.276263
YDR027C	-0.351674
YDR028C	-0.125424
YDR030C	-0.0558846
YDR031W	-0.204362
YDR032C	0.0182586
YDR033W	-0.184944
YDR034C	-0.29016
YDR035W	0.238994
YDR036C	-0.395402
YDR037W	-0.36322
YDR038C	-0.0618441
YDR039C	0.020519
YDR040C	0.229145
YDR041W	0.055619
YDR043C	-0.453166
YDR044W	-0.394996
YDR045C	-0.112955
YDR046C	0.248471
YDR047W	-0.537721
YDR050C	-0.389294
YDR051C	-0.129399
YDR052C	-0.499708
YDR054C	-0.268096
YDR055W	0.337486
YDR057W	-0.301925
YDR058C	-0.268657
YDR059C	0.131909
YDR060W	-0.395003
YDR062W	-0.438484
YDR063W	-0.335035
YDR064W	-0.0273966
YDR065W	-0.477942
YDR068W	-0.306057
YDR069C	-0.0582484
YDR071C	-0.147214
YDR072C	-0.0358946
YDR073W	-0.0769591
YDR074W	0.633949
YDR075W	-0.321285
YDR076W	0.189672
YDR077W	0.953056
YDR078C	0.62257
YDR079W	-0.288926
YDR079C-A	-0.203173
YDR080W	-0.181123
YDR081C	-0.279144
YDR082W	-0.265357
YDR083W	-0.347289
YDR084C	-0.213177
YDR085C	0.210664
YDR086C	-0.243734
YDR087C	-0.304898
YDR088C	-0.12134
YDR091C	-0.420793
YDR092W	-0.563217
YDR093W	-0.46363
YDR096W	-0.190085
YDR097C	-0.239348
YDR098C	-0.234403
YDR099W	-0.109331
YDR100W	-0.290836
YDR101C	-0.324354
YDR103W	-0.447208
YDR104C	-0.312709
YDR105C	-0.170965
YDR106W	-0.115435
YDR107C	0.155349
YDR108W	-0.194699
YDR110W	-0.071568
YDR113C	-0.337212
YDR116C	-0.322379
YDR117C	-0.278581
YDR118W	-0.303658
YDR120C	-0.273747
YDR121W	-0.262545
YDR122W	-0.0432109
YDR123C	-0.432286
YDR125C	-0.186497
YDR126W	0.146605
YDR127W	0.00824607
YDR128W	-0.317936
YDR129C	-0.0312322
YDR130C	-0.197608
YDR135C	-0.417772
YDR137W	-0.1324
YDR138W	-0.347558
YDR139C	-0.169359
YDR140W	-0.4483
YDR141C	-0.254814
YDR142C	-0.358081
YDR143C	-0.325783
YDR144C	-0.187478
YDR145W	-0.177157
YDR146C	-0.325767
YDR147W	-0.351859
YDR148C	-0.0640097
YDR150W	-0.192867
YDR151C	-0.310811
YDR152W	-0.148556
YDR153C	-0.36176
YDR155C	-0.352985
YDR156W	-0.257421
YDR158W	-0.0738668
YDR159W	-0.321404
YDR160W	-0.336634
YDR162C	-0.100665
YDR163W	-0.194598
YDR164C	-0.270689
YDR165W	-0.416191
YDR166C	-0.33405
YDR167W	-0.227117
YDR168W	-0.312781
YDR169C	-0.348462
YDR170C	-0.312953
YDR171W	0.418279
YDR172W	-0.28452
YDR173C	-0.20698
YDR174W	-0.127968
YDR175C	-0.269472
YDR176W	-0.379835
YDR177W	-0.210639
YDR178W	0.150252
YDR179C	-0.253274
YDR180W	-0.50458
YDR181C	-0.214978
YDR182W	-0.128323
YDR183W	-0.300353
YDR184C	-0.439563
YDR185C	-0.901588
YDR186C	-0.163815
YDR188W	-0.314613
YDR189W	-0.463753
YDR190C	-0.132656
YDR191W	-0.310198
YDR192C	-0.253329
YDR194C	-0.298019
YDR195W	-0.303271
YDR196C	-0.115555
YDR197W	-0.159155
YDR198C	-0.375842
YDR200C	-0.200082
YDR201W	-0.120169
YDR202C	-0.154347
YDR204W	-0.145054
YDR205W	-0.352361
YDR206W	-0.434841
YDR207C	-0.286877
YDR208W	-0.199272
YDR211W	-0.148976
YDR212W	-0.406633
YDR213W	-0.241202
YDR214W	0.656428
YDR216W	1.25664
YDR217C	-0.264226
YDR218C	-0.289122
YDR219C	-0.216127
YDR221W	-0.424309
YDR223W	-0.0432548
YDR224C	-0.523821
YDR225W	-0.467178
YDR226W	-0.552019
YDR227W	-0.361369
YDR228C	-0.367784
YDR229W	-0.304082
YDR231C	0.0267189
YDR232W	-0.260497
YDR233C	-0.371661
YDR234W	-0.240736
YDR235W	-0.508525
YDR236C	-0.307702
YDR237W	-0.432783
YDR238C	-0.420034
YDR239C	-0.38688
YDR240C	-0.330933
YDR242W	-0.233322
YDR243C	-0.233221
YDR244W	-0.0622097
YDR245W	-0.407103
YDR246W	-0.00356961
YDR247W	0.26247
YDR251W	-0.191483
YDR252W	-0.556915
YDR253C	-0.320295
YDR254W	-0.23509
YDR255C	-0.137643
YDR256C	-0.402931
YDR257C	-0.476142
YDR258C	0.294371
YDR259C	-0.347722
YDR260C	-0.162501
YDR261C	-0.327235
YDR263C	-0.427457
YDR264C	-0.32382
YDR265W	-0.408904
YDR266C	-0.358664
YDR267C	-0.38418
YDR268W	-0.766987
YDR270W	-0.582692
YDR272W	-0.0982206
YDR273W	-0.0855596
YDR275W	-0.322858
YDR276C	-0.0915543
YDR277C	0.647898
YDR279W	-0.624253
YDR280W	-0.578903
YDR281C	-2.26118
YDR283C	-0.356291
YDR284C	-0.536987
YDR285W	-0.436582
YDR287W	-0.204093
YDR288W	-0.319367
YDR289C	-0.341914
YDR292C	-0.392764
YDR293C	-0.152626
YDR294C	-0.117946
YDR295C	-0.606635
YDR296W	-0.288628
YDR297W	-0.154969
YDR298C	-0.0939385
YDR299W	-0.423773
YDR300C	-0.534779
YDR301W	-0.345554
YDR302W	-0.284673
YDR303C	-0.556484
YDR304C	-0.17779
YDR305C	-0.389599
YDR308C	-0.247372
YDR309C	-0.264701
YDR310C	-0.671816
YDR311W	-0.451276
YDR312W	-0.448981
YDR313C	-0.202066
YDR314C	-0.250548
YDR315C	-0.225468
YDR316W	-0.157379
YDR317W	-0.490816
YDR318W	-0.454479
YDR320C	-0.202662
YDR320C-A	-0.15168
YDR321W	-0.206594
YDR322W	-0.238707
YDR322C-A	-0.0740055
YDR323C	-0.30021
YDR324C	-0.39605
YDR325W	-0.403382
YDR326C	-0.328484
YDR328C	-0.0397357
YDR329C	-0.156442
YDR330W	-0.258684
YDR331W	-0.43733
YDR332W	-0.34098
YDR334W	-0.558116
YDR335W	-0.284557
YDR337W	-0.334326
YDR339C	-0.279655
YDR341C	-0.468137
YDR342C	1.59492
YDR343C	1.60768
YDR345C	-0.673336
YDR346C	-0.409659
YDR347W	-0.424143
YDR349C	-0.0859717
YDR350C	-0.13421
YDR351W	-0.006986
YDR353W	-0.17123
YDR354W	-0.117062
YDR356W	-0.428353
YDR358W	-0.0404974
YDR359C	-0.194192
YDR361C	-0.424561
YDR362C	-0.369555
YDR363W	-0.303655
YDR363W-A	-0.364335
YDR364C	-0.369762
YDR365C	-0.252806
YDR367W	-0.370977
YDR368W	-0.858944
YDR369C	-0.529109
YDR372C	-0.204467
YDR373W	-0.0579225
YDR375C	-0.256835
YDR376W	-0.200231
YDR377W	-0.25606
YDR378C	-0.368866
YDR379W	-0.0127324
YDR379C-A	0.13461
YDR380W	0.407593
YDR381W	-0.179486
YDR381C-A	-0.421359
YDR382W	0.0396265
YDR383C	-0.361333
YDR384C	0.365816
YDR385W	-0.305981
YDR386W	-0.174631
YDR388W	0.0176933
YDR389W	-0.283469
YDR390C	-0.315311
YDR392W	-0.152614
YDR393W	-0.431271
YDR394W	-0.384819
YDR395W	-0.483707
YDR397C	-0.268167
YDR398W	-0.529295
YDR399W	-0.671125
YDR400W	-0.396383
YDR402C	-0.191022
YDR403W	-0.624429
YDR404C	-0.195493
YDR405W	-0.214213
YDR406W	-0.226856
YDR407C	-0.334519
YDR408C	-0.245503
YDR409W	-0.396383
YDR410C	-0.62573
YDR411C	-0.243955
YDR412W	-0.168322
YDR414C	-0.355445
YDR416W	-0.195512
YDR418W	0.158841
YDR419W	-0.24319
YDR420W	-0.210652
YDR421W	0.108307
YDR422C	-0.280527
YDR423C	-0.327201
YDR424C	-0.33653
YDR425W	-0.231091
YDR427W	-0.339258
YDR428C	-0.582545
YDR429C	-0.310709
YDR430C	-0.261225
YDR432W	-0.154122
YDR434W	-0.191833
YDR435C	-0.109634
YDR436W	-0.117347
YDR437W	-0.184073
YDR438W	-0.292081
YDR439W	-0.374085
YDR440W	-0.610565
YDR441C	-0.851515
YDR443C	-0.2518
YDR446W	-0.413455
YDR447C	0.0543199
YDR448W	-0.289069
YDR449C	-0.360811
YDR450W	0.0462031
YDR451C	-0.224919
YDR452W	-0.405945
YDR453C	-0.630739
YDR454C	-0.384169
YDR456W	-0.317279
YDR457W	-0.308327
YDR458C	-0.204569
YDR459C	-0.338559
YDR460W	-1.08593
YDR461W	-3.16229
YDR462W	-0.0725111
YDR463W	-0.195523
YDR464W	-0.47112
YDR465C	-0.313732
YDR466W	-0.28131
YDR468C	-0.303449
YDR469W	-0.180277
YDR470C	-0.27977
YDR471W	0.0602204
YDR472W	-0.224615
YDR473C	-0.324055
YDR475C	-0.356176
YDR477W	-0.166951
YDR478W	-0.371497
YDR479C	-0.327289
YDR480W	-0.603954
YDR481C	-0.598116
YDR482C	-0.120996
YDR483W	-0.404924
YDR484W	-0.348258
YDR485C	-0.197557
YDR486C	-0.0708526
YDR487C	-0.0869098
YDR488C	-0.330423
YDR489W	-0.432423
YDR490C	-0.220178
YDR492W	-0.204189
YDR493W	-0.201654
YDR494W	-0.190619
YDR495C	-0.365343
YDR496C	-0.333563
YDR497C	0.640101
YDR498C	0.0841439
YDR499W	-0.333978
YDR500C	0.0803197
YDR501W	-0.509559
YDR502C	0.301659
YDR503C	-0.256085
YDR504C	-0.500753
YDR505C	-0.214569
YDR507C	-0.310725
YDR508C	0.0604633
YDR510W	-0.268415
YDR511W	-0.341166
YDR512C	-0.180357
YDR513W	-0.0528618
YDR515W	-0.50362
YDR516C	0.00134443
YDR517W	-0.371889
YDR518W	-0.519034
YDR519W	-0.372626
YDR522C	-0.101297
YDR523C	-0.445663
YDR524C	-0.218985
YDR525W-A	0.332488
YDR527W	-0.35486
YDR528W	-0.504231
YDR529C	0.0218316
YDR530C	-0.0182375
YDR531W	-0.336407
YDR532C	-0.254597
YDR533C	-0.738369
YDR534C	-0.138956
YDR536W	-0.0271099
YDR538W	-0.19037
YDR539W	-0.281504
YDR540C	-0.839178
YDR542W	-0.404482
YDR545W	0.269704
YEL072W	-0.1505
YEL071W	-0.510262
YEL069C	0.224021
YEL066W	0.0627886
YEL065W	-0.423049
YEL064C	-0.536402
YEL063C	-0.278104
YEL062W	-0.260288
YEL061C	-0.45009
YEL060C	0.108983
YEL059C-A	-0.289558
YEL058W	-0.381046
YEL056W	-0.546369
YEL055C	-0.587249
YEL054C	0.0620479
YEL053C	-0.235018
YEL052W	-0.312269
YEL051W	-0.405091
YEL050C	-0.303423
YEL049W	-0.0329663
YEL048C	-0.317461
YEL047C	-0.407151
YEL046C	-0.0227744
YEL044W	-0.665682
YEL043W	-0.435549
YEL042W	-0.535942
YEL041W	-0.204102
YEL040W	-0.213371
YEL039C	-0.0884514
YEL038W	-0.352332
YEL037C	-0.682618
YEL036C	-0.138624
YEL034W	-0.0980488
YEL032W	-0.192078
YEL031W	-0.367332
YEL030W	-0.347753
YEL029C	-0.293942
YEL027W	-0.0662069
YEL026W	-0.272918
YEL024W	0.0683248
YEL022W	-0.41042
YEL021W	-0.379758
YEL020W-A	-0.17274
YEL019C	-0.377054
YEL018W	-0.577998
YEL017C-A	-0.454603
YEL017W	-0.294972
YEL016C	-0.418544
YEL015W	-0.182199
YEL013W	-0.301303
YEL012W	0.0321976
YEL011W	0.162046
YEL009C	-0.0111985
YEL006W	-0.571667
YEL005C	-0.41879
YEL004W	-0.47856
YEL003W	-0.27004
YEL002C	-0.285138
YEL001C	-0.0575845
YER001W	-0.298256
YER002W	-0.235106
YER003C	-0.385386
YER004W	-0.350238
YER005W	-0.3966
YER006W	-0.241767
YER007W	-0.495439
YER007C-A	-0.352563
YER008C	-0.23767
YER009W	-0.19215
YER010C	-0.343393
YER011W	-0.205542
YER012W	-0.356724
YER013W	-0.303325
YER014W	-0.469837
YER014C-A	-0.686559
YER015W	-0.452903
YER016W	-0.384608
YER017C	-0.0984328
YER018C	-0.293488
YER019W	-0.53888
YER019C-A	-0.437934
YER020W	-0.336725
YER021W	-0.280815
YER022W	-0.335401
YER023W	-0.218389
YER024W	-0.431316
YER025W	-0.335003
YER026C	0.380205
YER027C	-0.380767
YER028C	-0.905996
YER029C	-0.351179
YER030W	-0.314937
YER031C	-0.183203
YER032W	-0.195696
YER033C	-0.201536
YER035W	-0.203772
YER036C	-0.482956
YER037W	-0.257098
YER038C	-0.402399
YER039C	-0.433795
YER040W	-0.0435858
YER041W	-0.338197
YER042W	-0.341275
YER043C	-0.195721
YER044C	-0.272868
YER044C-A	-0.424014
YER045C	-0.17417
YER046W	-0.222127
YER047C	-0.162594
YER048C	-0.215623
YER048W-A	0.102685
YER049W	-0.371385
YER050C	0.0324994
YER051W	-0.290342
YER052C	0.230795
YER053C	0.442353
YER054C	0.294898
YER055C	-0.0376895
YER056C	-0.288928
YER056C-A	-0.0200196
YER057C	-0.185423
YER058W	-0.0106762
YER059W	-0.37347
YER060W	-0.92406
YER060W-A	-0.357887
YER061C	-0.527904
YER062C	0.226124
YER063W	-0.259974
YER065C	0.313219
YER067W	0.789246
YER068W	0.0380121
YER069W	0.0341937
YER070W	-0.275099
YER072W	-0.308544
YER073W	0.0727849
YER074W	0.0335039
YER074W-A	-0.155647
YER075C	-0.251953
YER078C	-0.143788
YER080W	-0.286362
YER081W	0.11451
YER082C	-0.139397
YER083C	-0.16502
YER086W	-0.15159
YER087W	-0.459094
YER087C-B	-0.347909
YER088C	-0.0705232
YER089C	-0.0842324
YER090W	-0.108373
YER091C	-0.0411959
YER092W	-0.0969641
YER093C	-0.238207
YER093C-A	-0.382739
YER094C	-0.228427
YER095W	-0.64192
YER096W	-0.633983
YER098W	-0.241454
YER099C	-0.161157
YER100W	-0.195126
YER101C	-0.139797
YER102W	0.0076361
YER103W	-0.0939841
YER104W	-0.405206
YER105C	-0.397204
YER106W	-0.472233
YER107C	-0.411706
YER109C	-0.447135
YER110C	0.0135614
YER111C	-0.316948
YER112W	-0.269345
YER113C	-0.425816
YER114C	-0.227915
YER115C	-0.465085
YER116C	-0.184396
YER117W	0.0476374
YER118C	-0.34616
YER119C	-0.164561
YER120W	-0.207678
YER122C	-0.219272
YER123W	-0.27005
YER124C	-0.433198
YER125W	-0.27742
YER126C	-0.353255
YER127W	-0.329182
YER129W	-0.321608
YER131W	-0.131361
YER132C	-0.359858
YER133W	-0.185209
YER136W	-0.266974
YER139C	0.00748243
YER141W	-0.317742
YER142C	-0.668473
YER143W	-0.304602
YER144C	-0.0403284
YER145C	-0.791717
YER146W	-0.327125
YER147C	-0.181278
YER148W	-0.299433
YER149C	-0.511817
YER150W	0.281957
YER151C	-0.321958
YER152C	-0.479066
YER153C	-0.344966
YER154W	-0.520276
YER155C	-0.352055
YER157W	-0.448471
YER159C	0.365348
YER161C	-0.354159
YER162C	-0.209887
YER164W	-0.369368
YER165W	-0.364956
YER166W	-0.341066
YER167W	-0.296944
YER168C	-0.23392
YER169W	-0.111261
YER170W	-0.26051
YER171W	-0.305513
YER172C	-0.306283
YER173W	-0.306452
YER174C	-0.333789
YER175C	-0.21484
YER176W	-0.584792
YER177W	-0.196803
YER178W	-0.125037
YER179W	-0.134483
YER180C	-0.41888
YER180C-A	-0.215265
YER183C	-0.264114
YER185W	-0.383302
YER190W	0.0364857
YFL062W	0.503338
YFL060C	-0.270188
YFL059W	-0.357415
YFL058W	-0.204828
YFL057C	-0.231433
YFL056C	-0.141604
YFL055W	-0.242015
YFL053W	-0.179212
YFL050C	-0.219256
YFL049W	-0.162032
YFL048C	0.0435969
YFL047W	-0.0691128
YFL045C	-0.482234
YFL044C	-0.407549
YFL041W	-0.289935
YFL039C	-0.066698
YFL038C	0.030976
YFL037W	-0.525499
YFL036W	-0.224763
YFL034C-B	-0.455468
YFL034C-A	-0.0299083
YFL033C	-0.269206
YFL031W	-0.0288329
YFL030W	-0.105173
YFL029C	-0.19961
YFL028C	-0.124662
YFL027C	-1.02405
YFL026W	-4.20337
YFL025C	-0.875818
YFL024C	-0.14858
YFL023W	-0.33437
YFL022C	-0.346558
YFL021W	-0.334314
YFL020C	0.0286891
YFL018C	-0.0039426
YFL017W-A	-0.299292
YFL017C	-0.259186
YFL016C	-0.120174
YFL014W	2.45576
YFL013C	0.00341603
YFL011W	-0.381304
YFL010W-A	-0.131082
YFL010C	-0.118305
YFL009W	-0.520765
YFL008W	-0.438226
YFL007W	-0.256082
YFL005W	-0.906842
YFL004W	-0.989289
YFL003C	-0.563457
YFL002C	-0.231009
YFL001W	-0.209862
YFR001W	-0.29011
YFR002W	-0.361563
YFR003C	-0.187295
YFR004W	-0.209253
YFR005C	-0.377216
YFR007W	-0.14675
YFR008W	-0.147356
YFR009W	-0.364183
YFR010W	-0.27687
YFR011C	-0.208814
YFR013W	-0.366311
YFR014C	-0.149697
YFR015C	0.554623
YFR016C	-0.281733
YFR019W	-0.212568
YFR021W	-0.209229
YFR022W	-0.160591
YFR023W	-0.86169
YFR024C-A	-0.325506
YFR025C	-0.257899
YFR026C	-0.180965
YFR027W	-0.283565
YFR028C	-0.317207
YFR029W	-0.127391
YFR030W	-0.0740455
YFR031C	-0.307694
YFR031C-A	-0.105797
YFR032C-A	0.0399681
YFR033C	-0.0352711
YFR034C	-0.0842117
YFR036W	-0.214684
YFR037C	-0.271631
YFR038W	-0.416442
YFR040W	-0.284088
YFR041C	-0.473449
YFR042W	-0.332112
YFR043C	-0.502504
YFR044C	-0.26214
YFR046C	-0.423293
YFR047C	-0.464143
YFR048W	-0.194887
YFR049W	-0.264333
YFR050C	-0.201474
YFR051C	-0.233438
YFR052W	-0.0119176
YFR053C	1.58161
YGL263W	#NUM!
YGL258W	-0.184686
YGL257C	-0.475589
YGL256W	-0.442
YGL255W	-0.0771773
YGL254W	-0.0356766
YGL253W	-0.660769
YGL252C	-0.194438
YGL251C	-0.0967753
YGL250W	-0.22267
YGL249W	-0.175023
YGL248W	0.246177
YGL247W	-0.283084
YGL246C	-0.387532
YGL245W	-0.349622
YGL244W	-0.182404
YGL243W	-0.111181
YGL241W	-0.277326
YGL240W	-0.224577
YGL238W	-0.388952
YGL237C	-0.0881355
YGL236C	-0.300628
YGL234W	-0.278329
YGL233W	-0.374669
YGL232W	-0.405358
YGL231C	-0.178619
YGL229C	-0.433272
YGL228W	-0.211676
YGL227W	-0.223224
YGL226C-A	-0.311567
YGL226W	-0.270056
YGL225W	-0.447164
YGL224C	-0.30118
YGL223C	-0.0713359
YGL222C	-0.00385513
YGL221C	-0.12447
YGL220W	-0.124054
YGL219C	-0.11844
YGL216W	-0.276388
YGL215W	-0.391603
YGL213C	-0.415843
YGL212W	-0.131327
YGL211W	-0.101543
YGL210W	-0.525863
YGL209W	-0.305426
YGL208W	-0.22914
YGL207W	-0.39102
YGL206C	-0.182778
YGL205W	-0.440952
YGL203C	-0.280976
YGL202W	-0.229115
YGL201C	-0.232928
YGL200C	-0.424261
YGL198W	-0.137287
YGL197W	-0.107109
YGL196W	-0.379233
YGL195W	-0.31193
YGL194C	-0.268148
YGL192W	-0.261948
YGL191W	-0.0158177
YGL190C	-0.460141
YGL189C	0.0691804
YGL187C	-0.224982
YGL186C	-0.811504
YGL184C	0.283682
YGL183C	-0.283977
YGL181W	-0.059602
YGL180W	-0.38831
YGL179C	-0.334991
YGL178W	-0.12588
YGL175C	-0.380947
YGL174W	-0.509775
YGL173C	-0.385122
YGL172W	-0.335361
YGL171W	-0.468791
YGL170C	-0.590033
YGL169W	-0.369627
YGL168W	-0.388865
YGL167C	-0.218888
YGL166W	-0.228248
YGL164C	-0.351268
YGL163C	-0.520214
YGL162W	0.213035
YGL161C	-0.0816861
YGL160W	-0.253307
YGL158W	-0.266086
YGL157W	-0.27691
YGL156W	-0.332233
YGL155W	-0.337604
YGL154C	-0.31784
YGL153W	-0.309157
YGL151W	-0.22948
YGL150C	-0.16324
YGL148W	-0.332107
YGL147C	0.129961
YGL145W	-0.139373
YGL144C	-0.347504
YGL143C	-0.336361
YGL142C	-0.469152
YGL141W	-0.180574
YGL139W	-0.139988
YGL137W	-0.343328
YGL136C	-0.525957
YGL135W	0.125454
YGL134W	-0.183102
YGL133W	-0.188278
YGL131C	-0.122273
YGL130W	-0.118939
YGL129C	-0.323349
YGL128C	-0.193761
YGL127C	-0.319392
YGL126W	-0.065247
YGL125W	0.490212
YGL124C	-0.227148
YGL123W	0.0694575
YGL122C	-0.163019
YGL121C	0.0987758
YGL120C	-0.483068
YGL119W	-0.416877
YGL116W	-0.35319
YGL115W	-0.176582
YGL113W	-0.303578
YGL112C	-0.270208
YGL111W	-0.252261
YGL110C	-0.321484
YGL107C	-0.291218
YGL106W	-0.344638
YGL105W	-0.326267
YGL104C	-0.333142
YGL103W	0.0058722
YGL100W	-0.231404
YGL099W	-0.393613
YGL098W	-0.129599
YGL097W	-0.310505
YGL096W	-0.32057
YGL095C	-0.16047
YGL094C	-0.425177
YGL093W	-0.370649
YGL092W	-0.454492
YGL091C	-0.262027
YGL090W	-0.104743
YGL089C	0.120982
YGL087C	-0.00585242
YGL086W	-0.218884
YGL084C	-0.374858
YGL083W	-0.348092
YGL078C	-0.416206
YGL077C	-0.466387
YGL076C	-0.125073
YGL075C	-0.282848
YGL073W	-0.468668
YGL071W	-0.699009
YGL070C	-0.221546
YGL068W	-0.201807
YGL067W	-0.428929
YGL066W	-0.279771
YGL065C	-0.414158
YGL064C	-0.255166
YGL063W	-0.254378
YGL062W	-0.353812
YGL061C	-0.33989
YGL060W	-0.299771
YGL059W	0.0208494
YGL058W	-0.106399
YGL057C	-0.477849
YGL056C	-0.239288
YGL055W	-0.0416704
YGL054C	-0.359148
YGL053W	-0.0292367
YGL051W	-0.281471
YGL050W	-0.253333
YGL049C	0.137626
YGL048C	-0.199485
YGL047W	-0.313009
YGL045W	0.232248
YGL044C	-0.0425374
YGL043W	-0.192728
YGL040C	-0.475557
YGL039W	-0.706706
YGL038C	-0.320686
YGL037C	0.440285
YGL035C	-0.206572
YGL033W	-1.44567
YGL032C	-2.47626
YGL031C	-0.257473
YGL030W	-0.117663
YGL029W	-0.256763
YGL028C	-0.274945
YGL027C	-0.510814
YGL026C	-0.137469
YGL025C	-0.177843
YGL023C	-0.200141
YGL022W	-0.257661
YGL021W	-0.0864609
YGL020C	-0.308863
YGL019W	-0.226776
YGL018C	-0.216626
YGL017W	-0.250286
YGL016W	-0.301836
YGL014W	-0.357841
YGL013C	-0.278553
YGL012W	-0.552029
YGL011C	-0.172284
YGL009C	0.0515028
YGL008C	-0.234595
YGL006W	-0.145041
YGL005C	-0.276402
YGL004C	-0.334891
YGL003C	-0.18867
YGL002W	-0.287755
YGL001C	-0.34982
YGR002C	-0.218134
YGR003W	-0.192141
YGR004W	-0.325548
YGR005C	-0.138253
YGR006W	-0.150943
YGR007W	-0.0290639
YGR008C	0.271285
YGR009C	-0.125451
YGR010W	-0.234913
YGR012W	-0.318569
YGR013W	0.108839
YGR014W	0.177871
YGR019W	0.202856
YGR020C	-0.108298
YGR023W	0.231365
YGR024C	-0.189362
YGR027C	0.126948
YGR028W	-0.299726
YGR029W	-0.0927001
YGR030C	-0.173904
YGR031C-A	-0.112531
YGR032W	0.763292
YGR033C	-0.215252
YGR034W	0.0697842
YGR036C	-0.486332
YGR037C	-0.451495
YGR038W	-0.305502
YGR040W	-0.502095
YGR041W	-0.528817
YGR043C	-0.105502
YGR044C	-0.249517
YGR046W	-0.0960092
YGR047C	-0.234044
YGR048W	-0.199906
YGR049W	-0.0895295
YGR054W	-0.428534
YGR055W	-0.0725753
YGR056W	-0.362398
YGR057C	-0.264791
YGR058W	-0.316745
YGR059W	-0.631701
YGR060W	-0.36139
YGR061C	-0.620973
YGR062C	-0.189829
YGR063C	-0.241383
YGR065C	-0.306098
YGR068C	0.270242
YGR070W	0.128789
YGR072W	-0.384887
YGR074W	-0.399263
YGR075C	-0.30364
YGR076C	-0.237251
YGR077C	-0.432067
YGR078C	-0.399305
YGR080W	-0.266223
YGR081C	-0.334056
YGR082W	-0.354971
YGR083C	-0.338875
YGR084C	-0.325667
YGR085C	0.0528087
YGR086C	0.0987113
YGR087C	-0.238468
YGR088W	-0.0681223
YGR089W	-0.41626
YGR090W	-0.209676
YGR091W	0.242962
YGR092W	0.015643
YGR094W	-0.338304
YGR095C	-0.292369
YGR096W	-0.0139843
YGR097W	0.277765
YGR098C	-0.448123
YGR099W	-0.31602
YGR100W	-0.24266
YGR101W	-0.408904
YGR102C	0.032991
YGR103W	-0.313405
YGR104C	-0.219782
YGR105W	-0.357538
YGR106C	-0.291536
YGR108W	-0.299611
YGR109C	-0.134621
YGR110W	-0.435023
YGR112W	-0.283662
YGR113W	-0.247711
YGR116W	-0.289232
YGR118W	0.0428734
YGR119C	-0.312926
YGR120C	-0.368175
YGR121C	-0.478235
YGR122W	-0.741688
YGR123C	-0.58711
YGR124W	-0.0642782
YGR128C	-0.402424
YGR129W	-0.210255
YGR130C	0.110307
YGR131W	-0.412271
YGR132C	-0.179955
YGR133W	-0.0930183
YGR134W	-0.448812
YGR135W	-0.225541
YGR136W	-0.0307753
YGR138C	-0.349652
YGR140W	-0.413391
YGR141W	-0.3307
YGR142W	-0.293005
YGR143W	0.198556
YGR144W	-0.757186
YGR145W	-0.199571
YGR146C	0.322972
YGR147C	-0.157514
YGR148C	0.0456601
YGR150C	-0.382302
YGR152C	-0.529607
YGR154C	-0.0432574
YGR155W	-0.224606
YGR156W	0.0797084
YGR157W	0.219264
YGR158C	-0.327821
YGR159C	-0.397439
YGR162W	-0.441137
YGR163W	-0.263795
YGR165W	-0.117392
YGR166W	0.103273
YGR167W	-0.227701
YGR169C	-0.391484
YGR170W	-0.381824
YGR171C	-0.496502
YGR172C	-0.330678
YGR173W	-0.23698
YGR174C	0.235484
YGR175C	-0.334063
YGR177C	-0.420682
YGR178C	-0.270356
YGR179C	-0.225891
YGR180C	-0.288889
YGR181W	-0.355081
YGR183C	-0.0293998
YGR184C	-0.413376
YGR185C	-0.27812
YGR186W	-0.234899
YGR187C	-0.593629
YGR188C	-0.359052
YGR189C	0.450702
YGR191W	-0.415501
YGR192C	-0.0912756
YGR193C	-0.351607
YGR194C	-0.205699
YGR195W	-0.283273
YGR196C	-0.300891
YGR197C	-0.211143
YGR198W	-0.429234
YGR199W	-0.45449
YGR200C	-0.411954
YGR202C	-0.366443
YGR203W	-0.172343
YGR204W	-0.551845
YGR205W	-0.489979
YGR206W	-0.487055
YGR207C	-0.384133
YGR208W	-0.568338
YGR209C	-0.411677
YGR211W	-0.173702
YGR212W	-0.323002
YGR213C	-0.172426
YGR214W	-0.0931542
YGR215W	-0.393372
YGR216C	-0.321914
YGR217W	-0.197386
YGR218W	-0.259168
YGR220C	-0.183478
YGR221C	-0.231716
YGR222W	-0.218482
YGR223C	-0.1338
YGR224W	-0.289009
YGR225W	-0.225211
YGR227W	-0.326214
YGR229C	-0.500909
YGR230W	-0.340641
YGR231C	-0.289167
YGR232W	-0.412166
YGR233C	-0.721834
YGR234W	0.0627979
YGR236C	0.0672179
YGR238C	-0.281495
YGR239C	-0.113021
YGR240C	-0.427385
YGR241C	-0.0166787
YGR244C	0.0780073
YGR245C	-0.280205
YGR246C	-0.293915
YGR247W	-0.0149723
YGR248W	0.424545
YGR249W	-0.116086
YGR250C	-0.0577539
YGR251W	-0.605328
YGR252W	-0.419429
YGR253C	-0.234496
YGR254W	0.210929
YGR255C	-0.0689949
YGR256W	-0.245649
YGR257C	-0.328138
YGR258C	-0.36394
YGR260W	-0.535551
YGR261C	-0.220951
YGR262C	-0.215241
YGR263C	-0.346833
YGR264C	-0.328047
YGR266W	-0.371863
YGR267C	-0.183951
YGR268C	-0.0417851
YGR270W	-0.29993
YGR271W	-0.296837
YGR271C-A	-0.340119
YGR274C	-0.198841
YGR275W	-0.089474
YGR276C	-0.382821
YGR277C	-0.177682
YGR278W	-0.520623
YGR279C	-0.492935
YGR280C	-0.159692
YGR281W	-0.117255
YGR282C	-0.0664903
YGR283C	-0.0828371
YGR284C	-0.353183
YGR285C	-0.327292
YGR286C	-0.674875
YGR287C	-0.511631
YGR288W	0.0461316
YGR289C	-0.0217549
YGR292W	-0.317299
YGR294W	-0.599476
YGR295C	0.0232013
YGR296W	0.0415775
YHL048W	0.191077
YHL047C	-0.213522
YHL046C	-0.111873
YHL043W	-0.0553672
YHL040C	-0.449608
YHL039W	-0.353311
YHL038C	-0.204959
YHL036W	-0.0343999
YHL035C	-0.312631
YHL034C	-0.186881
YHL033C	0.0821774
YHL032C	-0.126737
YHL031C	-0.0263635
YHL030W	-0.574015
YHL028W	-1.2507
YHL027W	-0.0812534
YHL025W	-0.0705943
YHL024W	0.783401
YHL023C	-0.373157
YHL022C	-0.683556
YHL021C	0.202272
YHL020C	0.175096
YHL019C	-0.0104058
YHL016C	-0.14071
YHL015W	0.187017
YHL014C	-0.326405
YHL013C	-0.306823
YHL011C	-0.121879
YHL010C	-0.309554
YHL009C	-0.160105
YHL007C	-0.394087
YHL006C	0.0334028
YHL004W	-0.445185
YHL003C	-0.430072
YHL002W	-0.081454
YHL001W	0.10998
YHR001W	-0.162402
YHR001W-A	0.0913644
YHR002W	-0.372047
YHR003C	-0.481468
YHR004C	-0.403461
YHR005C	-0.43495
YHR005C-A	-0.563548
YHR006W	0.037295
YHR007C	-0.276381
[truncated: 3,771 more rows]

## Sheet: Spike-in nor RNA-Seq
gene_id	log2FC mRNA dcp2/WT	padj	gene_name		mRNA_up_dcp2_A	gene_id	mRNA_down_dcp2_A	gene_id
YAL012W	-0.130979	0.0263793	CYS3		FDR < 0.01	YER090C-A	FDR < 0.01	YOR304W
YAL069W	1	0.620205			FC > 1.4	YDR194W-A	FC > 1.4	YPL090C
YAL068W-A	0.32193	0.889603			N=2284	YLL030C	N=348	YBL100W-A
YAL068C	0.504424	0.0290375	PAU8			YIR020W-A		YLR208W
YAL067C	-0.193823	0.547619	SEO1			YCR040W		YLL034C
YAL066W	0.855611	0.42991				YGL089C		YNL302C
YAL065C	1.89826	4.12017e-18				YLR163W-A		YOR335C
YAL064W-B	1.42523	7.28531e-17				YPL187W		YGR061C
YAL064C-A	1.64981	7.32797e-08				YCL066W		YPR102C
YAL064W	1.87792	1.91667e-07				YEL050W-A		YNL016W
YAL063C-A	1.4105	6.18402e-12				YLR458W		YBR084C-A
YAL063C	2.05833	1.3724e-18	FLO9			YPL182C		YDL084W
YAL062W	0.391509	0.186707	GDH3			YGL014C-A		YER131W
YAL061W	1.97843	3.00086e-34	BDH2			YKL178C		YNL178W
YAL060W	0.970732	9.32933e-31	BDH1			YGR259C		YML115C
YAL059C-A	1.41504	0.0581962				YPL197C		YHR174W
YAL059W	0.0609247	0.551788	ECM1			YCL067C		YLR175W
YAL058W	0.156804	0.277568	CNE1			YBR124W		YDR120C
YAL056C-A	1.46778	0.0227364				YCL048W-A		YDR518W
YAL056W	0.132566	0.347469	GPB2			YIR041W		YMR014W
YAL055W	0.547107	0.00224088	PEX22			YLR327C		YBL047C
YAL054C	1.12471	1.73321e-09	ACS1			YCL065W		YBR084W
YAL053W	0.713217	3.97425e-24	FLC2			YLR466C-B		YHR099W
YAL051W	0.492184	0.00127581	OAF1			YGL259W		YDR154C
YAL049C	0.234184	0.00611711	AIM2			YOL166C		YOR051C
YAL048C	1.07003	1.02334e-13	GEM1			YFL063W		YKL128C
YAL047W-A	1.34578	0.0302513				YDL032W		YMR229C
YAL047C	0.454566	0.0217509	SPC72			YGR243W		YLR336C
YAL046C	0.202273	0.0575764	AIM1			YOR100C		YMR088C
YAL045C	0.415039	0.729686				YDR521W		YMR205C
YAL044W-A	0.66755	6.69444e-17				YIL054W		YLR342W
YAL044C	0.396729	1.4434e-07	GCV3			YGR224W		YPL146C
YAL043C	0.338488	0.00193773	PTA1			YOR178C		YKL165C
YAL042C-A	1.63346	0.0123565				YGL258W-A		YJR137C
YAL042W	-0.143732	0.0496496	ERV46			YBR298C-A		YEL051W
YAL041W	0.0640541	0.627652	CDC24			YFL052W		YMR142C
YAL040C	0.490036	1.969e-12	CLN3			YNL335W		YGL245W
YAL039C	0.139737	0.213852	CYC3			YEL049W		YKL180W
YAL038W	-0.430166	2.52766e-17	CDC19			YCR095W-A		YBL092W
YAL037C-B	-0.544318	0.620943				YPL152W-A		YNL271C
YAL037C-A	1.64909	0.57464				YFL014W		YBL068W-A
YAL037W	1.05198	2.83557e-06				YBR298C		YPL226W
YAL036C	-0.168359	0.0998319	RBG1			YGR242W		YNL209W
YAL035W	-0.454313	1.11978e-06	FUN12			YOR329W-A		YER102W
YAL034C-B	1.04731	0.401312				YDR343C		YML085C
YAL034W-A	0.142228	0.420737	MTW1			YGL118C		YNL238W
YAL034C	1.08378	8.84203e-24	FUN19			YOL052C-A		YHR020W
YAL033W	0.0427849	0.695728	POP5			YHL024W		YLR409C
YAL032C	0.29499	0.0637511	PRP45			YDR034W-B		YJR143C
YAL031W-A	1.73697	0.0011704				YLR269C		YNL023C
YAL031C	0.432902	0.012179	GIP4			YDR269C		YKL004W
YAL030W	-0.0580776	0.514508	SNC1			YJL022W		YFL023W
YAL029C	-0.0582081	0.664627	MYO4			YNL194C		YER001W
YAL028W	1.78124	7.24836e-24	FRT2			YFL061W		YKL060C
YAL027W	0.482486	0.00339329	SAW1			YKL217W		YOR095C
YAL026C-A	-0.398462	0.000424951				YHL016C		YAL023C
YAL026C	-0.297229	0.0126222	DRS2			YPR092W		YDR433W
YAL025C	-0.0861831	0.787704	MAK16			YIL101C		YIL052C
YAL024C	-0.547809	0.00279759	LTE1			YBR141W-A		YGR105W
YAL023C	-0.536857	3.87939e-15	PMT2			YJR004C		YJR064W
YAL022C	0.469522	2.89011e-08	FUN26			YOR202W		YDL019C
YAL021C	-0.238812	0.00416847	CCR4			YKL163W		YDR150W
YAL020C	0.600233	2.09682e-06	ATS1			YNL067W-A		YDL140C
YAL019W-A	0.980892	0.0593402				YOR055W		YKR090W
YAL019W	0.0477139	0.709687	FUN30			YIL071W-A		YPL037C
YAL018C	-0.0324201	0.975799				YFL019C		YBL020W
YAL017W	0.614678	1.39204e-07	PSK1			YCR104W		YPR116W
YAL016C-B	-5.61259	0.0168526				YDR018C		YAL024C
YAL016C-A	-0.194377	0.732193				YER006C-A		YBL072C
YAL016W	0.0941599	0.369691	TPD3			YCR020C		YLL053C
YAL015C	0.520098	0.000209164	NTG1			YIL066W-A		YGL014W
YAL014C	1.02252	1.02754e-29	SYN8			YHR022C		YOL151W
YAL013W	-0.128305	0.454891	DEP1			YOR120W		YLL008W
YAL011W	-0.0744936	0.767755	SWC3			YJL106W		YML093W
YAL010C	0.665581	5.05207e-06	MDM10			YHL045W		YHR032W-A
YAL009W	0.268831	0.0291118	SPO7			YOR161W-B		YLR043C
YAL008W	0.000591706	0.9999	FUN14			YCR007C		YBR219C
YAL007C	-0.309652	5.45994e-05	ERP2			YER066W		YER023W
YAL005C	0.169946	0.0103686	SSA1			YOL162W		YJL191W
YAL004W	1	0.459601				YDR536W		YJL171C
YAL003W	-0.470431	6.82218e-15	EFB1			YOR231C-A		YIL053W
YAL002W	0.683154	1.53078e-06	VPS8			YMR095C		YMR173W
YAL001C	0.342372	0.0426379	TFC3			YCR108C		YFL037W
YAR002W	0.349367	0.00122558	NUP60			YDL094C		YBR206W
YAR002C-A	-0.19645	0.00345154	ERP1			YDR010C		YOR192C-B
YAR003W	0.267833	0.0543495	SWD1			YOL164W-A		YDR428C
YAR007C	0.144363	0.235111	RFA1			YER054C		YBR155W
YAR008W	0.279601	0.0909313	SEN34			YCL023C		YGR162W
YAR009C	-0.720472	6.68839e-08				YLR334C		YPL106C
YAR010C	-1.04611	2.50788e-05				YGR289C		YOR116C
YAR014C	0.316823	0.00225136	BUD14			YCR018C-A		YBR162C
YAR015W	0.818666	2.33031e-17	ADE1			YLR322W		YBL004W
YAR018C	0.640418	2.97056e-06	KIN3			YDR271C		YEL031W
YAR019C	0.374435	0.0293619	CDC15			YPL186C		YHR085W
YAR019W-A	2.06125	1.83906e-17				YPR007C		YMR288W
YAR020C	1.90279	4.30887e-28	PAU7			YEL073C		YOL025W
YAR023C	1.83071	8.9006e-25				YMR206W		YEL042W
YAR027W	0.804494	3.07379e-18	UIP3			YIL160C		YLR214W
YAR028W	0.0824014	0.513013				YOL163W		YCL021W-A
YAR029W	0.648506	4.70529e-06				YFR015C		YOL103W-A
YAR030C	1.73838	4.93434e-16				YIL099W		YNL201C
YAR031W	0.0222048	0.908946	PRM9			YFR017C		YMR013W-A
YAR033W	0.745146	2.48146e-08	MST28			YCR047W-A		YGL206C
YAR035W	1.27302	1.6374e-08	YAT1			YIL058W		YKL056C
YAR035C-A	0.0554963	0.954307				YIL134C-A		YIL043C
YAR042W	0.157309	0.243813	SWH1			YNL332W		YBR286W
YAR047C	-1.38466	0.0657414				YFL020C		YLR150W
YAR050W	1.74322	1.62856e-10	FLO1			YHL037C		YPR074C
YAR053W	2.4746	4.92151e-07				YCR089W		YOR096W
YAR060C	0.106918	0.958885				YBL048W		YDR226W
YAR064W	1.39855	0.356582				YCR091W		YGR116W
YAR066W	-0.00309902	0.994175				YDR542W		YMR217W
YAR068W	0.149291	0.264457				YER067W		YMR173W-A
YAR069C	-0.520831	0.415909				YDL221W		YLR378C
YAR070C	-1.86434	0.00108899				YOL118C		YDR454C
YAR071W	-2.21797	9.41045e-21	PHO11			YKR058W		YMR058W
YAR073W	-0.386145	0.21407	IMD1			YJL161W		YGR180C
YAR075W	0.472936	0.352503				YGR174W-A		YJL130C
Q0010	0.515642	0.240421	Q0010			YDR216W		YFL041W
Q0017	1.16227	0.0262522	Q0017			YIL169C		YHR042W
Q0045	-0.189626	0.0294808	Q0045			YJL133C-A		YOR326W
Q0070	-0.210909	0.0173935	Q0070			YNL109W		YNL175C
Q0065	-0.163682	0.0778648	Q0065			YEL011W		YGL196W
Q0060	-0.0791438	0.490033	Q0060			YIL100C-A		YDR144C
Q0055	-0.0555261	0.609229	Q0055			YPR160W-A		YGL027C
Q0050	0.15988	0.502167	Q0050			YCR102W-A		YIL149C
Q0075	0.558756	0.0139628	NA			YKL036C		YMR012W
Q0080	0.0269674	0.952962	NA			YBL049W		YGR286C
Q0085	0.455755	0.773168	NA			YIL028W		YLR179C
Q0092	0.494791	0.934552	Q0092			YHR087W		YMR246W
Q0105	-0.0778364	0.820394	Q0105			YNR034W-A		YNL066W
Q0120	-0.0599763	0.870372	Q0120			YNL285W		YOR309C
Q0115	-0.0851934	0.789663	Q0115			YLR428C		YJL117W
Q0110	0.0163499	0.965716	Q0110			YCR010C		YJL047C-A
Q0130	0.127061	0.146878	NA			YLR252W		YDL153C
Q0140	0.247382	0.606015	NA			YGR292W		YNL010W
Q0142	1.03953	0.715639	Q0142			YLL059C		YLR256W-A
Q0143	-0.584958	0.735432	Q0143			YIL072W		YHR193C
Q0144	0.514581	0.931127	Q0144			YNR002C		YHL028W
Q0160	0.711435	1.69995e-05	NA			YCR099C		YPR158C-C
Q0182	-0.230691	0.242242	Q0182			YOL165C		YOR332W
Q0250	0.145106	0.170008	Q0250			YKL220C		YOR310C
Q0255	0.226875	0.373056	Q0255			YMR323W		YNL042W-B
Q0275	0.241095	0.00666157	NA			YAR053W		YGR035C
Q0297	0.116364	0.14	Q0297			YMR251W		YML125C
YER054C	2.81587	3.26855e-42	GIP2			YOR318C		YNL292W
YER114C	-0.335032	0.00432601	BOI2			YOR008W-B		YLR087C
YER169W	-0.0576547	0.707924	RPH1			YEL009C-A		YOR315W
YEL077C	0.937205	7.83258e-06				YJL195C		YBR015C
YEL077W-A	1.38042	0.000193632				YGL121C		YIL039W
YEL076C-A	1.22571	0.0234511				YJR153W		YBR011C
YEL076C	0.698732	0.0223949				YMR271C		YLR410W
YEL075W-A	0.797104	2.45622e-05				YBR147W		YKR059W
YEL075C	1	0.0727801				YER121W		YPR137C-A
YEL074W	1.31097	4.91086e-12				YPL148C		YOR143C
YEL073C	2.77392	4.02251e-94				YIR039C		YHR047C
YEL072W	2.07857	4.26818e-57	RMD6			YER078W-A		YDL058W
YEL071W	-0.0827605	0.290766	DLD3			YDR119W-A		YLR029C
YEL070W	2.24005	1.53157e-09	DSF1			YDR048C		YPR157W
YEL069C	1.78427	0.168797	HXT13			YPL250C		YOR012W
YEL068C	0.396291	0.000618246				YOR161W-A		YNL259C
YEL067C	1.20611	1.89234e-10				YLR444C		YJL129C
YEL066W	0.202522	0.0997148	HPA3			YPR160W		YJR029W
YEL065W	1.35055	2.71019e-47	SIT1			YML084W		YOR192C-A
YEL064C	0.725852	5.06842e-08	AVT2			YLR307C-A		YBR042C
YEL063C	1.27753	2.67511e-69	CAN1			YKL026C		YGR146C-A
YEL062W	0.582703	0.000364226	NPR2			YCR101C		YIL126W
YEL061C	-0.0991389	0.606706	CIN8			YKR097W		YJR077C
YEL060C	0.856837	1.66365e-23	PRB1			YLR037C		YDL095W
YEL059C-A	0.354142	5.02653e-05	SOM1			YNL276C		YMR209C
YEL059W	0.987617	0.0172496	HHY1			YMR189W		YLL021W
YEL058W	0.219123	0.01002	PCM1			YBR033W		YDR483W
YEL057C	0.633872	0.0136867				YLR040C		YKL073W
YEL056W	0.227629	0.0469883	HAT2			YNR069C		YDR345C
YEL055C	-0.407021	4.23548e-05	POL5			YOR186W		YOR032C
YEL054C	-0.340579	3.18459e-08	RPL12A			YJR005C-A		YKL214C
YEL053W-A	0.176879	0.844566				YLR312C		YPL227C
YEL053C	0.249873	0.0441402	MAK10			YGR248W		YNL024C
YEL052W	0.465912	5.03069e-06	AFG1			YNL202W		YDR481C
YEL051W	-0.512533	2.12326e-11	VMA8			YCL048W		YAR009C
YEL050W-A	5.96623	0.00597891				YDR535C		YOL103W-B
YEL050C	-0.0457922	0.676833	RML2			YCR100C		YPL207W
YEL049W	3.47158	2.3456e-49	PAU2			YJL077C		YHR054C
YEL048C	1.20942	3.94768e-18	TCA17			YKL161C		YHR179W
YEL047C	-0.079036	0.461269				YBR043C		YPR069C
YEL046C	0.280611	2.86224e-06	GLY1			YMR105C		YPL217C
YEL045C	0.353482	1.02444e-05				YJR154W		YHR216W
YEL044W	0.180394	0.0924824	IES6			YJR128W		YDR365C
YEL043W	-0.0499291	0.709964				YCR006C		YPL082C
YEL042W	-0.591604	4.34714e-16	GDA1			YDR277C		YDR326C
YEL041W	1.79788	4.93461e-16	YEF1			YER023C-A		YEL017C-A
YEL040W	-0.131569	0.038887	UTR2			YMR169C		YDR334W
YEL039C	2.12971	1.30198e-133	CYC7			YPL258C		YLR413W
YEL038W	-0.0136238	0.90767	UTR4			YGR154C		YLR342W-A
YEL037C	-0.305554	0.000261056	RAD23			YML042W		YLR138W
YEL036C	-0.0292448	0.788028	ANP1			YFR052C-A		YML051W
YEL035C	-0.0458021	0.969555	UTR5			YCR045W-A		YIL020C
YEL034C-A	-0.17333	0.850908				YLR149C		YJL026W
YEL034W	-0.350431	1.03163e-11	HYP2			YPR193C		YMR241W
YEL033W	-0.239911	0.000789377	MTC7			YIL057C		YBL067C
YEL032W	0.210714	0.0533008	MCM3			YIL177W-A		YDR464W
YEL031W	-0.584523	2.93245e-14	SPF1			YML057C-A		YLR126C
YEL030C-A	2.22239	0.000565573				YER185W		YOR133W
YEL030W	1.0434	5.24532e-09	ECM10			YGR236C		YPR158C-D
YEL029C	0.227495	0.0396077	BUD16			YLR281C		YGL099W
YEL028W	1.93735	4.63516e-51				YMR046W-A		YML126C
YEL027W	-0.139321	0.042173	VMA3			YLR286W-A		YNL234W
YEL026W	-0.331871	1.93906e-08	SNU13			YDL204W		YOR099W
YEL025C	0.600705	1.9658e-05				YOR009W		YDL070W
YEL024W	0.3138	7.07744e-06	RIP1			YLR251W		YOR071C
YEL023C	1.55915	1.32973e-15				YFL058W		YLR157C-B
YEL022W	-0.270472	0.0388678	GEA2			YDL187C		YDL227C
YEL021W	-0.182253	0.100045	URA3			YHL009W-A		YHR029C
YEL020C-B	-0.862495	0.229163				YJL114W		YJL121C
YEL020W-A	0.151564	0.0306818	TIM9			YPL230W		YKL127W
YEL020C	0.552473	0.000459001				YIR020C		YDR365W-B
YEL019C	0.575408	0.0010794	MMS21			YLR053C		YPR137C-B
YEL018C-A	-0.299557	0.851714				YBR051W		YOR007C
YEL018W	0.138418	0.453261	EAF5			YGR070W		YOL064C
YEL017C-A	-0.736868	5.68353e-26	PMP2			YDL096C		YGR123C
YEL017W	0.21482	0.0137782	GTT3			YHL042W		YNL054W-A
YEL016C	1.03056	1.97832e-15	NPP2			YLR280C		YML072C
YEL015W	0.308761	0.00221459	EDC3			YEL070W		YGR260W
YEL014C	2.80735	0.0223574				YDR007W		YML040W
YEL013W	0.0474366	0.612881	VAC8			YJL113W		YDR094W
YEL012W	0.706369	1.21954e-07	UBC8			YHL009W-B		YJR028W
YEL011W	2.60349	6.66554e-98	GLC3			YGL146C		YML039W
YEL010W	1.87447	0.299013				YNR068C		YBR086C
YEL009C-A	2.45317	5.03517e-16				YEL030C-A		YLR354C
YEL009C	0.17254	0.0130458	GCN4			YGR161C		YML074C
YEL008W	0.615571	0.166458				YLR374C		YPL014W
YEL008C-A	1.42797	4.93705e-43				YOL085C		YIL114C
YEL007W	0.443417	1.64177e-06				YMR107W		YMR274C
YEL006W	0.691437	4.38407e-12	YEA6			YBR089W		YBL098W
YEL005C	1.18004	3.56436e-20	VAB2			YNL057W		YDR365W-A
YEL004W	0.551754	0.000270714	YEA4			YML090W		YDR210C-D
YEL003W	0.448116	2.32609e-07	GIM4			YJL153C		YER110C
YEL002C	-0.326536	5.1382e-05	WBP1			YOR134W		YDR180W
YEL001C	-0.0264584	0.723154	IRC22			YOL126C		YBR106W
YER001W	-0.533087	1.9343e-10	MNN1			YPL272C		YGR138C
YER002W	-0.288638	0.259542	NOP16			YJL144W		YDL048C
YER003C	-0.303278	0.000248883	PMI40			YER175W-A		YOR336W
YER004W	-0.161594	0.0383304	FMP52			YHR096C		YJL080C
YER005W	0.129268	0.273038	YND1			YFR026C		YOR049C
YER006W	-0.270635	0.00288095	NUG1			YHL050W-A		YNL067W
YER006C-A	2.95842	6.78132e-17				YBL094C		YKL080W
YER007W	0.254814	0.41804	PAC2			YNR058W		YDL129W
YER007C-A	-0.0767715	0.432769	TMA20			YIL082W-A		YNL217W
YER008C	-0.464876	0.000231272	SEC3			YIR030W-A		YPR086W
YER009W	-0.118476	0.121094	NTF2			YFL055W		YER072W
YER010C	0.452918	2.18677e-07				YDR019C		YMR215W
YER011W	-0.471801	0.00365481	TIR1			YLR174W		YER160C
YER012W	0.10327	0.196472	PRE1			YFR053C		YLR213C
YER013W	-0.0354854	0.882947	PRP22			YIL029C		YDR210C-C
YER014W	0.246013	0.136671	HEM14			YFL056C		YPR009W
YER014C-A	-0.888106	0.113962	BUD25			YHR028W-A		YDR261C-C
YER015W	0.991833	4.20991e-08	FAA2			YEL039C		YNL284C-A
YER016W	-0.0544693	0.717669	BIM1			YMR085W		YGR233C
YER017C	0.422567	2.215e-05	AFG3			YDR124W		YHR214C-B
YER018C	0.773102	3.52932e-14	SPC25			YGR064W		YBL005W-A
YER019W	-0.00875788	0.94139	ISC1			YJR156C		YAR010C
YER019C-A	-0.238045	0.000152602	SBH2			YHL047C		YLR227W-B
YER020W	0.11673	0.344636	GPA2			YBR072W		YOR199W
YER021W	0.105543	0.265749	RPN3			YMR065W		YNL095C
YER022W	0.241008	0.101432	SRB4			YMR084W		YJR027W
YER023W	-0.56345	9.53385e-17	PRO3			YHL006W-A		YBL005W-B
YER023C-A	2.32193	0.00617602				YPR123C		YDL066W
YER024W	1.24163	2.70478e-10	YAT2			YLR416C		YLR035C-A
YER025W	-0.223166	0.00274001	GCD11			YGR109W-B		YOR344C
YER026C	0.778613	2.25977e-30	CHO1			YNR056C		YNL284C-B
YER027C	-0.302752	0.00681074	GAL83			YIL163C		YBR012W-B
YER028C	0.58376	0.000800045	MIG3			YBR299W		YGR027W-B
YER029C	-0.162222	0.193761	SMB1			YJR155W		YKL044W
YER030W	-0.107339	0.208915	CHZ1			YOR391C		YMR046C
YER031C	-0.158935	0.207074	YPT31			YLR446W		YHR053C
YER032W	-0.130406	0.359077	FIR1			YGL205W		YGR161C-D
YER033C	0.551763	0.000475599	ZRG8			YKL086W		YER165W
YER034W	0.698715	1.39289e-08				YPR005C		YGR038C-B
YER035W	0.930494	9.48239e-33	EDC2			YGR066C		YFL004W
YER036C	-0.337545	7.79031e-07	ARB1			YEL072W		YDL171C
YER037W	-0.449533	2.95672e-06	PHM8			YIL164C		YMR045C
YER038C	0.888107	2.84979e-07	KRE29			YER066C-A		YER097W
YER038W-A	0.702614	0.000841044				YDL244W		YCL064C
YER039C	2.01545	2.27993e-38	HVG1			YLR263W		YKL043W
YER039C-A	2.06217	4.6248e-50				YPL171C		YOL013W-A
YER040W	0.816113	7.0981e-11	GLN3			YER039C-A		YER159C-A
YER041W	1.23775	9.12384e-13	YEN1			YAR019W-A		YML058W-A
YER042W	-0.0512762	0.67757	MXR1			YAL063C		YOR053W
YER043C	-0.0723987	0.285805	SAH1			YLR235C		YGR038C-A
YER044C	0.0977726	0.237684	ERG28			YBL096C		YMR050C
YER044C-A	1.82221	1.47929e-17	MEI4			YIL066C		YBR012W-A
YER045C	0.66149	4.25699e-09	ACA1			YGR088W		YOR192C-C
YER046W	1.3394	2.08296e-19	SPO73			YLR315W		YHR214C-C
YER046W-A	-0.63387	0.504401				YLR318W		YDR316W-A
YER047C	0.100527	0.686702	SAP1			YOL159C-A		YGR161C-C
YER048C	-0.167607	0.114963	CAJ1			YPR030W		YNL087W
YER048W-A	0.353024	1.97779e-06	ISD11			YJL088W		YER138C
YER049W	-0.237544	0.0079605	TPA1			YJL215C		YMR006C
YER050C	0.670651	6.87702e-15	RSM18			YGR161W-C		YOR236W
YER051W	0.638856	8.47803e-05	JHD1			YMR291W		YER137C-A
YER052C	0.422699	9.60438e-09	HOM3			YOR128C		YMR051C
YER053C	0.660697	5.07052e-15	PIC2			YGL193C		YPL222C-A
YER053C-A	1.47206	3.49083e-126				YJR095W		YJR026W
YER055C	0.0977531	0.211334	HIS1			YBR018C		YBR263W
YER056C	0.10775	0.1489	FCY2			YFL064C		YOR108C-A
YER056C-A	-0.0506194	0.465812	RPL34A			YMR180C		YML045W
YER057C	-0.130798	0.0543616	HMF1			YGR032W		YGL204C
YER058W	0.397512	0.00706095	PET117			YJL116C		YNL097W-A
YER059W	0.492885	9.51862e-05	PCL6			YML128C		YHR055C
YER060W	-1.73085	5.70643e-40	FCY21			YDR250C		YJL012C
YER060W-A	1.20866	8.89688e-09	FCY22			YOR173W		YMR266W
YER061C	0.393095	0.0310417	CEM1			YER039C		YHR094C
YER062C	0.0852833	0.412793	HOR2			YIL102C-A		YER060W
YER063W	0.512405	1.23769e-07	THO1			YDR215C		YOR107W
YER064C	0.84921	1.40156e-20				YBR294W		YLR222C-A
YER065C	0.623086	0.0138492	ICL1			YDL242W		YNR060W
YER066W	2.89622	1.07492e-89	RRT13			YOR028C		YAR070C
YER066C-A	2.07039	0.000127086				YIL073C		YIR030C
YER067W	2.67429	4.03995e-230	RGI1			YML089C		YDR095C
YER067C-A	1.54432	0.0182601				YLL066W-B		YHR214C-E
YER068W	0.244183	0.0308565	MOT2			YKL162C-A		YNL146C-A
YER068C-A	3.6088	0.112905				YIL165C		YML045W-A
YER069W	1.27925	7.25747e-37	ARG5,6			YLL063C		YFL051C
YER070W	0.418762	1.69258e-08	RNR1			YCR014C		YGR249W
YER071C	0.363541	0.00398198				YOR376W-A		YNL067W-B
YER072W	-0.972586	1.7307e-59	VTC1			YLR406C-A		YPL019C
YER073W	0.163049	0.0625189	ALD5			YJL077W-B		YOR200W
YER074W	-0.372687	3.99064e-09	RPS24A			YER084W		YAR071W
YER074W-A	-0.0101859	0.915434	YOS1			YDL197C		YHR215W
YER075C	0.159343	0.299844	PTP3			YMR315W-A		YDL039C
YER076C	1.47619	1.33211e-29				YNL270C		YJL169W
YER076W-A	0.222807	0.374216				YJR008W		YBR093C
YER077C	0.876873	4.93064e-12				YAL061W		YKL209C
YER078C	0.076321	0.636024	ICP55			YLR010C		YFR010W-A
YER078W-A	2.4184	9.53661e-28				YLR258W		YFL026W
YER079W	1.13507	1.29793e-15				YCR073C		YHR136C
YER079C-A	1.37851	0.383337				YFL057C		YPL165C
YER080W	-0.156248	0.194655	AIM9			YCL007C		YDL037C
YER081W	0.786859	2.26243e-12	SER3			YPL282C		YDR281C
YER082C	-0.0359302	0.762916	UTP7			YLR122C		YGL032C
YER083C	0.404946	7.69804e-08	GET2			YHR049C-A		YNL145W
YER084W	1.98472	1.10589e-24				YGL024W		YIL015W
YER084W-A	1.26303	0.528206				YHR211W		YML123C
YER085C	1.17403	0.0872599				YDR534C		YDR461W
YER086W	-0.136398	0.113809	ILV1			YPL017C		YJL170C
YER087W	0.0787368	0.687426	AIM10			YEL028W		YCR097W
YER087C-A	0.94732	0.00149276				YLR030W		YLR157W-E
YER087C-B	-0.301645	2.66095e-06	SBH1			YDL109C		YNL144W-A
YER088C	0.516035	4.09964e-10	DOT6			YNL146W
YER088C-A	0.572138	3.58125e-21				YHR209W
YER088W-B	-0.700801	0.0247552				YJL152W
YER089C	0.275246	8.01527e-05	PTC2			YHR054W-A
YER090W	0.184988	0.0478478	TRP2			YOR192C
YER090C-A	8.57195	1.43012e-07				YHR153C
YER091C	0.0897857	0.198811	MET6			YHR212C
YER091C-A	0.0995387	0.960608				YBR297W
YER092W	1.40004	1.12634e-73	IES5			YFL065C
YER093C	0.186127	0.32928	TSC11			YCR020W-B
YER093C-A	0.466873	7.5629e-05	AIM11			YKR041W
YER094C	0.365745	7.08307e-08	PUP3			YMR242W-A
YER095W	0.680746	1.39518e-14	RAD51			YLR125W
YER096W	0.485427	0.075915	SHC1			YBR103C-A
YER097W	-1.18139	7.85729e-29				YFL054C
YER098W	0.706269	0.00225085	UBP9			YCR096C
YER099C	0.452499	3.29056e-07	PRS2			YAR020C
YER100W	-0.0978707	0.382973	UBC6			YIL060W
YER101C	1.38542	2.22785e-18	AST2			YHL036W
YER102W	-0.522758	5.54766e-14	RPS8B			YDL085W
YER103W	1.39638	9.28725e-20	SSA4			YML007C-A
YER104W	1.02579	7.94927e-14	RTT105			YKL188C
YER105C	-0.0929158	0.443877	NUP157			YAL065C
YER106W	0.402099	0.498521	MAM1			YIR031C
YER107C	-0.165842	0.185762	GLE2			YJR151C
YER107W-A	5.25001	0.038548				YPL261C
YER109C	0.975441	3.8922e-15	FLO8			YGR043C
YER110C	-0.904472	6.17496e-35	KAP123			YCR039C
YER111C	0.307495	0.0428373	SWI4			YGL069C
YER112W	-0.098843	0.281479	LSM4			YAL064W
YER113C	-0.255559	0.0294808	TMN3			YDL243C
YER115C	0.382171	0.00223082	SPR6			YMR175W
YER116C	1.19384	1.10787e-21	SLX8			YNL046W
YER117W	-0.243517	6.57349e-05	RPL23B			YGL034C
YER118C	0.0635055	0.527229	SHO1			YPR153W
YER119C	0.391695	0.00163566	AVT6			YOR304C-A
YER119C-A	1.34915	0.0334896				YJL216C
YER120W	-0.328111	1.00872e-07	SCS2			YCR041W
YER121W	2.4234	1.07817e-34				YJL199C
YER122C	-0.0190631	0.842155	GLO3			YKL221W
YER123W	0.120967	0.299013	YCK3			YIR013C
YER124C	0.489291	8.73546e-09	DSE1			YLR317W
YER125W	-0.144279	0.0909351	RSP5			YCL016C
YER126C	-0.123185	0.135901	NSA2			YLR123C
YER127W	0.0283649	0.798431	LCP5			YNR073C
YER128W	0.304117	0.042499				YAR023C
YER129W	0.144584	0.261848	SAK1			YCL004W
YER130C	-0.214314	0.0210178				YER044C-A
YER131W	-0.492266	2.38497e-17	RPS26B			YCR106W
YER132C	-0.465633	0.000234152	PMD1			YIR019C
YER133W	-0.033437	0.721909	GLC7			YBR270C
YER133W-A	3.44262	0.471672				YPR036W-A
YER134C	0.37348	2.32382e-05				YLR031W
YER135C	1.52356	0.0172218				YIR042C
YER136W	-0.153701	0.0838341	GDI1			YOL157C
YER137C	1.14977	1.73361e-14				YJR152W
YER137W-A	-0.342886	0.70196				YGL010W
YER138C	-1.40474	2.63353e-10				YEL041W
YER137C-A	-1.50852	4.94237e-07				YNL279W
YER138W-A	0.37277	1.39669e-05				YML054C
YER139C	1.18942	9.88079e-25	RTR1			YHR157W
YER140W	-0.0637702	0.709828				YKL187C
YER141W	0.0136613	0.892277	COX15			YHL002C-A
YER142C	0.401051	0.0601729	MAG1			YFL050C
YER143W	0.357095	0.00590301	DDI1			YPR002W
YER144C	0.425147	0.000926549	UBP5			YCR075C
YER145C	-0.159059	0.0561668	FTR1			YCL049C
YER145C-A	-0.197445	0.770369				YAL028W
YER146W	-0.0867666	0.305456	LSM5			YDR342C
YER147C	0.10343	0.591394	SCC4			YHR199C-A
YER147C-A	1.48542	0.46955				YDR008C
YER148W	-0.393149	3.18646e-06	SPT15			YPL111W
YER148W-A	-0.245111	0.838137				YMR104C
YER149C	-0.140707	0.366964	PEA2			YOL164W
YER150W	1.37717	1.26626e-55	SPI1			YLR267W
YER151C	0.128635	0.306614	UBP3			YBR284W
YER152C	0.0118741	0.915521				YBL100W-C
YER152W-A	0.144392	0.9207				YGL125W
YER153C	0.444302	0.00206691	PET122			YOL104C
YER154W	0.322546	0.00149562	OXA1			YJL156W-A
YER155C	-0.364991	0.000785409	BEM2			YCL040W
YER156C	-0.310995	9.91405e-05				YOR381W
YER157W	-0.126033	0.42896	COG3			YCL010C
YER158C	0.0227636	0.880972				YHL012W
YER158W-A	-0.676055	0.160195				YPL281C
YER159C	0.678318	0.00460024	BUR6			YDR379C-A
YER160C	-0.979605	1.44766e-09				YOR010C
YER159C-A	-1.24011	0.000306845				YOL058W
YER161C	0.101141	0.414411	SPT2			YCR015C
YER162C	0.50127	0.0449667	RAD4			YBR293W
YER163C	0.834231	5.25076e-18				YHR033W
YER164W	-0.23939	0.0771654	CHD1			YAR050W
YER165W	-1.11691	4.05644e-66	PAB1			YAR030C
YER165C-A	1.32193	0.453261				YAL031W-A
YER166W	-0.125376	0.269946	DNF1			YDR203W
YER167W	0.0821792	0.49593	BCK2			YER189W
YER168C	0.318829	0.012834	CCA1			YMR158C-A
YER170W	0.640909	1.04335e-06	ADK2			YCR076C
YER171W	0.189085	0.148492	RAD3			YGR288W
YER172C	0.087629	0.590399	BRR2			YLR377C
YER172C-A	2.50249	0.218687				YLR236C
YER173W	1.34331	3.70136e-18	RAD24			YIL024C
YER174C	-0.341203	0.000891217	GRX4			YPL280W
YER175C	1.4564	1.63148e-37	TMT1			YJL221C
YER175W-A	2.18191	2.29962e-28				YMR007W
YER176W	-0.210321	0.267494	ECM32			YJL027C
YER177W	-0.061651	0.362095	BMH1			YDL021W
YER178W	-0.455102	4.5867e-13	PDA1			YHR180W
YER179W	0.223833	0.637071	DMC1			YPL166W
YER180C	0.712671	2.13505e-07	ISC10			YLR173W
YER180C-A	0.689147	0.000164792	SLO1			YCL056C
YER181C	-0.26946	0.611119				YPL238C
YER182W	0.468687	0.000194622	FMP10			YOR348C
YER183C	-0.0344034	0.79168	FAU1			YDL169C
YER184C	1.37903	3.5197e-17				YCR063W
YER185W	2.3004	1.48371e-26	PUG1			YIL155C
YER186C	0.601821	7.90819e-08				YCL030C
YER187W	0.304598	0.366657				YBR020W
YER188W	-0.268887	0.314881				YOL106W
YER188C-A	1.16431	9.92737e-10				YCR107W
YER189W	1.73697	1.07632e-12				YOL047C
YER190W	0.682708	0.00447845	YRF1-2			YOL160W
YER190C-B	1.02672	0.0253986				YML100W
YJL091C	0.368434	8.75696e-05	GWT1			YLR466C-A
YJL026W	-0.769154	9.70804e-32	RNR2			YOR019W
YJL026C-A	0.0740037	0.968562				YCR085W
YJR125C	0.222905	0.0330429	ENT3			YLR151C
YJL225C	1.03804	0.0129713				YKR103W
YJL225W-A	3.02757	0.578219				YGL090W
YJL223C	0.316826	0.0378111	PAU1			YBR277C
YJL222W-B	-4.44264	0.208307				YNL117W
YJL222W-A	4.28032e-06	0.999999				YLR232W
YJL222W	0.70941	2.77328e-09	VTH2			YHR139C
YJL221C	1.72002	2.74194e-11	IMA4			YML034C-A
YJL220W	-3.76456	0.382292				YGR213C
YJL219W	0.678072	0.253071	HXT9			YDL162C
YJL218W	-0.267621	0.290549				YHR160C
YJL217W	0.0555434	0.504212	REE1			YCR036W
YJL216C	1.85618	9.34236e-12	IMA5			YDR082W
YJL215C	2.04223	5.51639e-22				YOR062C
YJL214W	0.913585	0.00739216	HXT8			YOL084W
YJL213W	0.0341377	0.848759				YOR380W
YJL212C	0.495621	1.02679e-08	OPT1			YCL018W
YJL211C	0.858763	0.000286404				YOL091W
YJL210W	0.755673	2.33031e-17	PEX2			YBR184W
YJL209W	-0.0124712	0.947455	CBP1			YOR366W
YJL208C	-0.0443562	0.697094	NUC1			YAL064C-A
YJL207C	-0.259348	0.0836074	LAA1			YMR096W
YJL206C	0.344583	0.0593599				YKL106C-A
YJL205C	-0.101507	0.202371	NCE101			YJR108W
YJL204C	0.624164	0.000203094	RCY1			YCL012C
YJL203W	0.300124	0.0558463	PRP21			YOR374W
YJL202C	0.466569	0.516111				YNL125C
YJL201W	0.555579	2.1657e-06	ECM25			YKL222C
YJL200C	0.226576	0.0173672	ACO2			YIL046W-A
YJL199C	1.85507	4.40395e-40	MBB1			YKR091W
YJL198W	-0.190241	0.0998258	PHO90			YMR090W
YJL197W	-0.318372	0.0394118	UBP12			YOR343C
YJL196C	-0.172142	0.0836701	ELO1			YOR180C
YJL195C	2.45066	0.00275865				YOR161C-C
YJL194W	0.235209	0.101012	CDC6			YMR030W
YJL193W	0.332938	0.00302076				YLR004C
YJL192C	-0.0231109	0.803129	SOP4			YCL039W
YJL191W	-0.56377	3.69849e-20	RPS14B			YCL042W
YJL190C	-0.43666	1.3873e-12	RPS22A			YIR029W
YJL189W	-0.175375	0.00343036	RPL39			YCL024W
YJL188C	-0.572577	0.524645	BUD19			YPR196W
YJL187C	0.265124	0.0459908	SWE1			YFL041W-A
YJL186W	0.0917309	0.286001	MNN5			YBL065W
YJL185C	1.45979	4.78974e-22				YMR316C-B
YJL184W	0.646427	3.88363e-16	GON7			YDR171W
YJL183W	-0.250912	0.00575091	MNN11			YIL013C
YJL182C	0.304856	0.842803				YCR023C
YJL181W	0.340957	0.0630456				YPL066W
YJL180C	-0.0607742	0.669721	ATP12			YGL063W
YJL179W	0.447688	8.76972e-10	PFD1			YCL068C
YJL178C	0.080588	0.369691	ATG27			YGR131W
YJL177W	-0.445418	2.50827e-12	RPL17B			YKR106W
YJL176C	-0.0759308	0.591545	SWI3			YHR022C-A
YJL175W	0.54057	0.736486				YIL059C
YJL174W	0.248439	0.000864528	KRE9			YNR034W
YJL173C	-0.190941	0.0409518	RFA3			YLR152C
YJL172W	-0.428427	1.53157e-09	CPS1			YPL113C
YJL171C	-0.565214	3.11784e-12				YBR019C
YJL170C	-5.36507	7.25167e-28	ASG7			YLL060C
YJL169W	-2.63227	0.000834075				YHR056W-A
YJL168C	0.316617	0.0208313	SET2			YMR103C
YJL167W	0.0338869	0.676657	ERG20			YKR033C
YJL166W	0.121642	0.102635	QCR8			YHL049C
YJL165C	-0.295012	0.0226802	HAL5			YNL114C
YJL164C	0.368853	0.00342004	TPK1			YKL169C
YJL163C	1.16724	1.91539e-09				YMR320W
YJL162C	0.973528	4.47757e-10	JJJ2			YKR075C
YJL161W	2.64194	1.29145e-76	FMP33			YHR210C
YJL160C	0.196589	0.698048				YGR109C
YJL159W	0.760673	2.11702e-51	HSP150			YLR467W
YJL158C	0.257641	2.0726e-06	CIS3			YHR189W
YJL157C	-0.160798	0.1612	FAR1			YMR114C
YJL156W-A	1.75937	3.99873e-19				YGR107W
YJL156C	0.230984	0.0651591	SSY5			YKL037W
YJL155C	1.00844	1.84235e-12	FBP26			YCR022C
YJL154C	0.0252006	0.857558	VPS35			YEL023C
YJL153C	2.19909	8.41589e-29	INO1			YNL203C
YJL152W	1.92735	4.5303e-05				YMR063W
YJL151C	0.664786	8.83911e-28	SNA3			YNL144C
YJL150W	0.566419	0.00763303				YOR364W
YJL149W	0.633982	1.9318e-05	DAS1			YKL050C
YJL148W	-0.42437	1.29188e-06	RPA34			YGL041C
YJL147C	0.664297	9.54721e-05				YLL025W
YJL146W	0.732696	3.77412e-08	IDS2			YBR217W
YJL145W	-0.145446	0.177411	SFH5			YBR291C
YJL144W	2.1882	2.68619e-64				YMR250W
YJL143W	0.273828	0.00223393	TIM17			YHR069C-A
YJL142C	1.42568	5.116e-24	IRC9			YGR067C
YJL141C	1.39999	4.77814e-33	YAK1			YNL093W
YJL140W	0.152862	0.0560865	RPB4			YJL105W
YJL139C	0.287282	0.0106255	YUR1			YDR391C
YJL138C	-0.448173	4.03746e-11	TIF2			YJR073C
YJL137C	-0.291412	0.0521158	GLG2			YDR402C
YJL136W-A	1.12873	0.0421177				YBL074C
YJL136C	-0.110632	0.0933159	RPS21B			YLR178C
YJL135W	0.635868	6.56333e-05				YPR077C
YJL134W	0.227782	0.028966	LCB3			YKL131W
YJL133C-A	2.61056	0				YDL022C-A
YJL133W	0.33734	2.84551e-05	MRS3			YNL289W
YJL132W	1.36899	3.73631e-16				YCR038C
YJL131C	0.321928	0.0865809	AIM23			YMR196W
YJL130C	-0.624217	2.43039e-15	URA2			YGL184C
YJL129C	-0.694995	2.10333e-08	TRK1			YLR124W
YJL128C	0.193534	0.080251	PBS2			YKL102C
YJL127W-A	1.83007	0.0340192				YBR050C
YJL127C-B	1.04257	5.85213e-46				YOR394C-A
YJL127C	0.607863	2.00038e-05	SPT10			YDL214C
YJL126W	0.778676	9.77997e-07	NIT2			YCR020C-A
YJL125C	-0.233371	0.0659425	GCD14			YDL215C
YJL124C	0.193003	0.0171548	LSM1			YDR545W
YJL123C	-0.377602	0.00268025	MTC1			YDR242W
YJL122W	-0.187752	0.0275159	ALB1			YDR384C
YJL121C	-0.808328	6.8998e-34	RPE1			YDR169C-A
YJL120W	1.43911	0.00889142				YMR159C
YJL119C	0.985289	1.67087e-12				YCR066W
YJL118W	0.882787	9.32363e-21				YDR009W
YJL117W	-0.64446	1.85882e-12	PHO86			YGR225W
YJL116C	2.01927	9.135e-63	NCA3			YBL078C
YJL115W	0.57904	0.00251431	ASF1			YGL015C
YJL114W	2.2679	5.89698e-22				YNL014W
YJL113W	2.23412	1.26482e-23				YBR285W
YJL112W	0.477875	0.00099309	MDV1			YCL032W
YJL111W	-0.360318	0.000130533	CCT7			YKL065W-A
YJL110C	1.48264	7.20016e-61	GZF3			YDR406W-A
YJL109C	-0.294047	0.00331029	UTP10			YGL235W
YJL108C	0.745759	2.49245e-05	PRM10			YJR021C
YJL107C	0.991685	2.89868e-10				YLR461W
YJL106W	2.91132	1.64233e-48	IME2			YPL223C
YJL105W	1.53743	0.000706229	SET4			YPR184W
YJL104W	0.24658	0.000650731	PAM16			YGR176W
YJL103C	0.674461	0.000113532	GSM1			YKR045C
YJL102W	-0.0261765	0.919188	MEF2			YJL110C
YJL101C	-0.101363	0.30477	GSH1			YJR115W
YJL100W	0.567685	9.52523e-05	LSB6			YKL096W
YJL099W	0.306634	0.0581406	CHS6			YPR202W
YJL098W	-0.309769	0.00962849	SAP185			YPL189C-A
YJL097W	0.156349	0.0894764	PHS1			YER076C
YJL096W	0.177643	0.0569327	MRPL49			YJL089W
YJL095W	-0.314017	0.0612667	BCK1			YNL328C
YJL094C	0.0865029	0.503593	KHA1			YCR018C
YJL093C	0.801213	4.90203e-14	TOK1			YOR072W
YJL092W	-0.0724556	0.65488	SRS2			YHR213W-A
YJL090C	0.888969	1.40565e-11	DPB11			YER053C-A
YJL089W	1.47603	6.1292e-05	SIP4			YIL055C
YJL088W	2.04537	1.76469e-58	ARG3			YKL071W
YJL087C	-0.263448	0.100474	TRL1			YKR104W
YJL086C	-0.192645	0.455342				YCR019W
YJL085W	0.463362	0.0019819	EXO70			YDL196W
YJL084C	0.526142	4.9071e-05	ALY2			YHL035C
YJL083W	0.201362	0.231305	TAX4			YKR061W
YJL082W	0.598797	3.75217e-08	IML2			YPR203W
YJL081C	0.219249	0.0553575	ARP4			YJL185C
YJL080C	-0.93806	6.93198e-29	SCP160			YGL222C
YJL079C	1.06436	5.70482e-54	PRY1			YDL154W
YJL078C	-0.224011	0.0219987	PRY3			YNL036W
YJL077W-B	1.98674	1.55944e-67				YER175C
YJL077C	2.34368	3.72416e-11	ICS3			YBL075C
YJL077W-A	0.919215	9.30303e-23				YLL057C
YJL076W	-0.244393	0.0290581	NET1			YDL079C
YJL075C	-4.02761	0.256697	APQ13			YLR376C
YJL074C	-0.00353447	0.987437	SMC3			YOR314W-A
YJL073W	-0.129119	0.362095	JEM1			YLR233C
YJL072C	0.644597	2.35745e-09	PSF2			YJR020W
YJL071W	0.718203	7.44129e-07	ARG2			YCL005W
YJL070C	0.668702	0.00168589				YNL128W
YJL069C	-0.154213	0.218779	UTP18			YKR069W
YJL068C	0.363578	8.07119e-05				YIL077C
YJL067W	-1.02599	0.0978774				YGL251C
YJL066C	0.811737	3.37473e-14	MPM1			YDR403W
YJL065C	1.25723	9.01489e-47	DLS1			YMR105W-A
YJL064W	-0.847995	0.411127				YLR341W
YJL063C	0.148918	0.13468	MRPL8			YJL120W
YJL062W-A	0.210016	0.00182055	COA3			YCR068W
YJL062W	0.0315409	0.805989	LAS21			YDR530C
YJL061W	0.218547	0.065273	NUP82			YDL222C
YJL060W	0.251874	0.0110228	BNA3			YBR223C
YJL059W	0.770147	4.26968e-08	YHC3			YEL008C-A
YJL058C	0.501411	0.00132326	BIT61			YJL142C
YJL057C	0.98754	3.42742e-10	IKS1			YAL064W-B
YJL056C	0.0156817	0.936545	ZAP1			YPR085C
YJL055W	0.18412	0.0369907				YLR132C
YJL054W	0.00463963	0.974277	TIM54			YCL061C
YJL053W	0.625304	3.53677e-07	PEP8			YNR059W
YJL052C-A	0.598638	0.520476				YMR056C
YJL052W	-0.00804275	0.935958	TDH1			YHR176W
YJL051W	-0.111536	0.473727	IRC8			YAL063C-A
YJL050W	-0.281222	0.00914025	MTR4			YNL338W
YJL049W	1.2275	6.68476e-17				YMR153C-A
YJL048C	0.256101	0.0115882	UBX6			YGR256W
YJL047C-A	-0.646778	1.44311e-10				YCR102C
YJL047C	0.0584369	0.75238	RTT101			YGL156W
YJL046W	0.436918	0.000545288	AIM22			YOR190W
YJL045W	0.21042	0.687426				YER092W
YJL044C	0.781799	3.6692e-13	GYP6			YJL141C
YJL043W	0.619969	0.218487				YPR026W
YJL042W	-0.382595	0.00120347	MHP1			YPL214C
YJL041W	0.0911479	0.422066	NSP1			YER103W
YJL039C	-0.128435	0.275407	NUP192			YOL043C
YJL038C	0.326229	0.487414	LOH1			YFR012W
YJL037W	1.3295	0.0041262	IRC18			YPR201W
YJL036W	0.472606	9.15633e-05	SNX4			YOR328W
YJL035C	-0.01849	0.917022	TAD2			YDR459C
YJL034W	-0.45763	2.34244e-13	KAR2			YNR057C
YJL033W	-0.291982	0.00870815	HCA4			YOL158C
YJL032W	-2.08745	0.27634				YGL063C-A
YJL031C	-0.0949363	0.540195	BET4			YER101C
YJL030W	-0.119739	0.411827	MAD2			YHL043W
YJL029C	-0.0226182	0.876957	VPS53			YGR142W
YJL028W	-0.45943	0.513522				YPL088W
YJL027C	1.71926	0.00501023				YOR349W
YJL025W	0.758702	8.76624e-08	RRN7			YGR068W-A
YJL024C	0.602535	3.068e-11	APS3			YIL120W
YJL023C	1.0912	1.59781e-09	PET130			YDR431W
YJL022W	3.16581	8.86331e-24				YBR296C-A
YJL020C	-0.190761	0.0549619	BBC1			YEL077W-A
YJL020W-A	0.304856	0.827513				YMR018W
YJL019W	0.0940309	0.535698	MPS3			YER184C
YJL016W	0.287239	0.00763633				YER150W
YJL015C	-1.08517	0.0341987				YBR047W
YJL014W	-0.285863	0.000333444	CCT3			YCL008C
YJL013C	0.943417	4.83295e-11	MAD3			YLR437C-A
YJL012C	-1.66612	1.03173e-92	VTC4			YPL264C
YJL011C	0.325532	0.00686067	RPC17			YKL098W
YJL010C	-0.408876	0.000194373	NOP9			YGR168C
YJL009W	-1.2713	0.116059				YJL132W
YJL008C	-0.255212	0.00296008	CCT8			YCL055W
YJL007C	0.887526	0.416141				YOR208W
YJL006C	0.259021	0.1063	CTK2			YIR018W
YJL005W	0.298315	0.0217009	CYR1			YKL031W
YJL004C	0.852108	7.72462e-23	SYS1			YKL070W
YJL003W	0.728726	3.09723e-09	COX16			YMR204C
YJL002C	-0.231996	0.00100995	OST1			YOR003W
YJL001W	-0.137049	0.0704291	PRE3			YLR393W
YJR001W	0.172698	0.138422	AVT1			YLR456W
YJR002W	-0.150822	0.194621	MPP10			YOL015W
YJR003C	0.0817245	0.549599				YLR164W
YJR004C	3.08365	3.69218e-292	SAG1			YNL331C
YJR005W	0.558563	7.21961e-06	APL1			YLR363C
YJR005C-A	2.36405	0.000211947				YNL063W
YJR006W	0.774752	1.51525e-13	POL31			YEL065W
YJR007W	-0.122995	0.136404	SUI2			YDR125C
YJR008W	1.98024	7.24756e-54				YBL060W
YJR009C	-0.284248	2.09348e-07	TDH2			YDR421W
YJR010W	0.385681	0.000459731	MET3			YIR017C
YJR010C-A	-0.0200017	0.875193	SPC1			YLR394W
YJR011C	0.319443	0.171729				YIL136W
YJR012C	0.42618	0.00665667				YNL160W
YJR013W	0.324826	0.00134233	GPI14			YDR320W-B
YJR014W	0.035053	0.709939	TMA22			YER173W
YJR015W	-0.0837661	0.279317				YHL026C
YJR016C	0.161708	0.0127553	ILV3			YDL199C
YJR017C	-0.0733731	0.448656	ESS1			YER046W
YJR018W	-0.369233	0.332671				YGR269W
YJR019C	0.579306	8.69412e-07	TES1			YNL025C
YJR020W	1.44812	1.90286e-12				YCL051W
YJR021C	1.49388	3.8253e-29	REC107			YGL041C-B
YJR022W	0.84809	1.69758e-12	LSM8			YIR016W
YJR023C	0.239035	0.405319				YKR077W
YJR024C	0.126391	0.125725	MDE1			YNL011C
YJR025C	-0.390956	2.32617e-06	BNA1			YPL278C
YJR027W	-1.05377	0.000134791				YLR266C
YJR026W	-1.53535	0.000434319				YOR223W
YJR029W	-0.695481	3.33542e-13				YBL071C
YJR028W	-0.854916	4.41277e-26				YJR036C
YJR030C	0.497906	0.00148447				YDR258C
YJR031C	-0.0282787	0.878404	GEA1			YGR015C
YJR032W	-0.0302309	0.823515	CPR7			YJL037W
YJR033C	0.584471	0.000219978	RAV1			YHR137W
YJR034W	0.566946	2.90172e-07	PET191			YMR151W
YJR035W	0.78962	3.40431e-05	RAD26			YGR016W
YJR036C	1.33096	1.46155e-06	HUL4			YPR158W
YJR037W	3.56802e-06	0.999999				YDR525W-A
YJR038C	0.726436	0.275329				YIL132C
YJR039W	1.14582	2.59179e-09				YLL055W
YJR040W	-0.178698	0.194292	GEF1			YMR052W
YJR041C	-0.137926	0.286322	URB2			YOL159C
YJR042W	0.0384742	0.792375	NUP85			YPL134C
YJR043C	0.222296	0.0786993	POL32			YDR058C
YJR044C	0.0985303	0.237	VPS55			YEL074W
YJR045C	-0.303039	1.75673e-05	SSC1			YBR132C
YJR046W	0.479867	1.19458e-05	TAH11			YCL035C
YJR047C	-0.380604	0.158213	ANB1			YPL257W
YJR048W	-0.455844	5.1825e-11	CYC1			YDL223C
YJR049C	0.545726	3.52797e-05	UTR1			YCL034W
YJR050W	0.308959	0.0161121	ISY1			YIL097W
YJR051W	-0.129602	0.350623	OSM1			YML003W
YJR052W	0.413545	0.012321	RAD7			YLR211C
YJR053W	0.0225427	0.925032	BFA1			YDL110C
YJR054W	-0.351816	0.00860092				YJR130C
YJR055W	0.355359	0.0548741	HIT1			YOR303W
YJR056C	0.639755	4.13625e-09				YIR014W
YJR057W	0.385025	0.000254826	CDC8			YGL007W
YJR058C	0.552754	3.19439e-06	APS2			YDL130W-A
YJR059W	0.488655	5.81348e-05	PTK2			YOR302W
YJR060W	0.198969	0.070462	CBF1			YMR055C
YJR061W	0.0489098	0.876957				YDR406W
YJR062C	0.893147	8.64501e-15	NTA1			YBL071W-A
YJR063W	0.41616	1.28518e-08	RPA12			YPL024W
YJR064W	-0.538692	2.55709e-11	CCT5			YFR008W
YJR065C	0.216221	0.00580191	ARP3			YGR057C
YJR066W	-0.317887	0.0521957	TOR1			YDL041W
YJR067C	0.546447	2.21163e-06	YAE1			YCR038W-A
YJR068W	-0.0544	0.638645	RFC2			YOR177C
YJR069C	-0.0916079	0.353179	HAM1			YPR078C
YJR070C	-0.436976	5.11587e-09	LIA1			YHR105W
YJR071W	1.32193	0.118534				YLR111W
YJR072C	0.0160213	0.895468	NPA3			YOR383C
YJR073C	1.53518	2.7297e-111	OPI3			YHR213W
YJR074W	0.593786	4.71023e-10	MOG1			YOR005C
YJR075W	-0.383967	9.53472e-06	HOC1			YOL048C
YJR076C	-0.192414	0.061914	CDC11			YOR023C
YJR077C	-0.701613	7.55607e-26	MIR1			YPL092W
YJR078W	-0.374395	0.0640002	BNA2			YKL164C
YJR079W	0.0723707	0.774307				YFR034W-A
YJR080C	0.371687	0.0014064	AIM24			YLR136C
YJR082C	0.750765	1.01707e-20	EAF6			YMR194C-B
YJR083C	0.740913	1.8974e-07	ACF4			YDR059C
YJR084W	0.524312	0.000210703	CSN12			YML002W
YJR085C	-0.191739	0.0110153				YGR133W
YJR086W	0.409078	0.00027014	STE18			YER069W
YJR087W	0.235914	0.163709				YMR174C
YJR088C	0.0167309	0.885041	EMC2			YNL314W
YJR089W	0.117085	0.589534	BIR1			YEL063C
YJR090C	-0.187606	0.187714	GRR1			YLR165C
YJR091C	0.150542	0.150333	JSN1			YHL021C
YJR092W	-0.0149724	0.937599	BUD4			YPL072W
YJR093C	0.481797	1.99029e-05	FIP1			YMR262W
YJR094C	0.225128	0.381789	IME1			YAR035W
YJR094W-A	0.140164	0.0384373	RPL43B			YPR168W
YJR095W	2.03194	1.33631e-06	SFC1			YHR014W
YJR096W	0.857317	3.65588e-12				YIL087C
YJR097W	0.86764	9.49682e-13	JJJ3			YLR284C
YJR098C	0.316595	0.170822				YLR345W
YJR099W	0.234873	0.0419867	YUH1			YDR386W
YJR100C	0.797984	3.15532e-11	AIM25			YHR018C
YJR101W	0.185782	0.0615089	RSM26			YOR363C
YJR102C	0.436161	0.000205059	VPS25			YLR120W-A
YJR103W	0.422874	1.59392e-05	URA8			YKL068W-A
YJR104C	0.204298	0.00176676	SOD1			YCL027W
YJR105W	-0.319655	2.34291e-07	ADO1			YGL007C-A
YJR106W	0.456955	0.00133755	ECM27			YFR020W
YJR107W	0.423344	0.000828912				YCR054C
YJR108W	1.63938	6.78362e-24	ABM1			YCR086W
YJR109C	1.02555	7.92795e-34	CPA2			YHR104W
YJR110W	0.837806	6.58564e-06	YMR1			YOR024W
YJR111C	0.628479	4.87078e-09				YDL020C
YJR112W	0.588111	2.4502e-05	NNF1			YOR162C
YJR112W-A	1.16814	6.66879e-31				YMR170C
YJR113C	0.137475	0.174477	RSM7			YJL065C
YJR114W	0.912053	0.0570916				YGL158W
YJR115W	1.4825	1.70788e-26				YML133C
YJR116W	0.253594	0.011068				YOR242C
YJR117W	0.019964	0.832024	STE24			YKL124W
YJR118C	-0.222121	0.0392639	ILM1			YKL091C
YJR119C	0.691625	0.00059926	JHD2			YNL138W-A
YJR120W	-0.0555004	0.572414				YGR287C
YJR121W	-0.161151	0.011212	ATP2			YLL018C-A
YJR122W	0.395175	0.00311706	IBA57			YOL117W
YJR123W	-0.367209	1.75852e-09	RPS5			YHR219W
YJR124C	-0.00297535	0.981962				YCR027C
YJR126C	-0.380081	0.00220732	VPS70			YHR194W
YJR127C	0.956739	2.23948e-14	RSF2			YER024W
YJR128W	2.33058	4.10587e-17				YLR271W
YJR129C	-0.063603	0.714863				YPR076W
YJR130C	1.29897	1.18921e-22	STR2			YBR065C
YJR131W	0.404641	0.00134495	MNS1			YIL166C
YJR132W	-0.225308	0.0625051	NMD5			YER041W
YJR133W	0.245732	0.018938	XPT1			YGL128C
YJR134C	0.223251	0.126767	SGM1			YCR081W
YJR135C	0.910425	4.65854e-08	MCM22			YDR374W-A
YJR135W-A	0.342561	0.000194445	TIM8			YBR008C
YJR136C	0.758863	3.98934e-07	TTI2			YGL059W
YJR137C	-0.511568	6.27901e-06	MET5			YKR101W
YJR138W	0.157437	0.401803	IML1			YBR056C-B
YJR139C	-0.255366	0.000480235	HOM6			YDR076W
YJR140C	0.106915	0.583761	HIR3			YLR408C
YJR140W-A	-0.669849	0.576821				YJL049W
YJR141W	-0.0694915	0.768617				YPL003W
YJR142W	0.263655	0.0271338				YIR007W
YJR143C	-0.525237	4.88772e-13	PMT4			YDR223W
YJR144W	-0.25381	0.0187773	MGM101			YDR133C
YJR145C	-0.387573	2.30496e-10	RPS4A			YOR203W
YJR146W	0.489338	9.90439e-05				YNL274C
YJR147W	-0.291621	0.000562054	HMS2			YNL204C
YJR148W	-0.0431353	0.605294	BAT2			YIL009C-A
YJR149W	0.793755	1.4697e-06				YCR073W-A
YJR150C	1.96613e-06	0.999999	DAN1			YLL066C
YJR151C	1.89157	8.6421e-21	DAN4			YDR448W
YJR152W	1.80012	8.67998e-29	DAL5			YIR028W
YJR153W	2.43767	1.23433e-24	PGU1			YCR024C
YJR154W	2.33245	1.06011e-47				YMR120C
YJR155W	2.08822	2.20788e-61	AAD10			YDR265W
YJR156C	2.11159	2.32351e-14	THI11			YDL247W-A
YJR157W	0.415039	0.768499				YCL038C
YJR158W	1.41503	0.56315	HXT16			YOR382W
YJR159W	0.967419	6.51817e-07	SOR1			YEL048C
YJR160C	0.485428	0.475962	MPH3			YPL185W
YJR161C	0.797338	1.76193e-17	COS5			YPR001W
YJR162C	3.62448	0.0178723				YER060W-A
YBL047C	-0.498153	3.5416e-10	EDE1			YEL067C
YBR012W-B	-1.08104	7.85812e-24				YBR145W
YBR078W	-0.323136	1.38868e-07	ECM33			YDL238C
YBR140C	0.26268	0.0393739	IRA1			YDR131C
YBL113C	0.853074	5.1658e-06				YKR004C
YBL113W-A	0.450915	0.352576				YCR060W
YBL112C	1.06052	5.57266e-09				YDR358W
YBL111C	1.07107	2.70633e-10				YDR231C
YBL109W	0.729836	0.0103205				YCR042C
YBL108C-A	1.11321	0.0858645	PAU9			YFL030W
YBL108W	0.637431	0.651004				YLR381W
YBL107W-A	0.43296	0.528206				YER116C
YBL107C	-0.0561727	0.667158				YIL117C
YBL106C	0.492169	0.021827	SRO77			YDR401W
YBL105C	0.0591535	0.691131	PKC1			YKL095W
YBL104C	0.126598	0.508515				YER139C
YBL103C	1.05233	7.45868e-21	RTG3			YLR227C
YBL102W	0.627276	8.7533e-17	SFT2			YDR085C
YBL101C	0.00885781	0.964647	ECM21			YBL064C
YBL100W-C	1.76999	7.55876e-06				YLR097C
YBL100W-B	-0.12549	0.289255				YNL187W
YBL100W-A	-0.483359	1.09857e-05				YHL018W
YBL100C	4.90209	0.0775087				YNL092W
YBL099W	-0.256132	0.00030375	ATP1			YDL119C
YBL098W	-0.887353	4.22676e-07	BNA4			YFL049W
YBL097W	-0.412876	0.167468	BRN1			YHR075C
YBL096C	2.05528	2.82442e-06				YBL039W-B
YBL095W	-0.0337408	0.822946				YEL005C
YBL094C	2.1635	3.98641e-11				YBR063C
YBL093C	-0.222843	0.0260045	ROX3			YCR079W
YBL092W	-0.517194	7.13703e-17	RPL32			YDR437W
YBL091C-A	0.957429	7.87942e-09	SCS22			YGR149W
YBL091C	-0.00940793	0.939477	MAP2			YLR273C
YBL090W	0.458264	4.67686e-06	MRP21			YOL083C-A
YBL089W	0.683656	2.50939e-09	AVT5			YCR075W-A
YBL088C	0.808282	6.58564e-06	TEL1			YDR130C
YBL087C	-0.306427	1.97384e-06	RPL23A			YOL032W
YBL086C	0.539052	9.96837e-05				YLR453C
YBL085W	-0.0394472	0.75599	BOI1			YNL009W
YBL084C	0.375056	0.0238536	CDC27			YFR022W
YBL083C	0.0708591	0.467703				YDR438W
YBL082C	0.164161	0.0904788	ALG3			YCR032W
YBL081W	-0.217247	0.0322104				YMR156C
YBL080C	0.494564	0.0108089	PET112			YDL231C
YBL079W	0.0565367	0.620857	NUP170			YJR112W-A
YBL078C	1.50417	6.85222e-54	ATG8			YLR415C
YBL077W	-0.678063	0.815117				YJL163C
YBL076C	-0.161998	0.0327588	ILS1			YOR379C
YBL075C	1.45616	9.50661e-26	SSA3			YER188C-A
YBL074C	1.53298	5.09507e-20	AAR2			YGL104C
YBL073W	1.22239	0.293619				YHR217C
YBL072C	-0.548062	2.65424e-18	RPS8A			YPL054W
YBL071C-B	-0.125039	0.246712				YML050W
YBL071W-A	1.29492	4.39661e-68	KTI11			YDR147W
YBL071C	1.33258	0.00295638				YOR020W-A
YBL070C	1.75002	0.127317				YOR292C
YBL069W	-0.390409	0.00129473	AST1			YPL068C
YBL068W-A	-0.519934	7.50389e-07				YGR194C
YBL068W	0.051818	0.64388	PRS4			YKL090W
YBL067C	-0.774845	7.56394e-12	UBP13			YMR086C-A
YBL066C	0.271196	0.0689868	SEF1			YPL229W
YBL065W	1.61599	0.00514095				YCR087W
YBL064C	1.18436	2.06963e-29	PRX1			YER137C
YBL063W	-0.232102	0.342896	KIP1			YOR358W
YBL062W	-1.32192	0.469168				YBR071W
YBL061C	-0.0673169	0.580896	SKT5			YJR039W
YBL060W	1.34703	4.53711e-18	YEL1			YHR048W
YBL059C-A	0.41924	1.23529e-06	CMC2			YDR055W
YBL059W	0.598186	1.97693e-06				YGR153W
YBL058W	0.24384	0.00472946	SHP1			YIL023C
YBL057C	0.0190131	0.867321	PTH2			YMR068W
YBL056W	0.0397522	0.693206	PTC3			YDR332W
YBL055C	-0.38251	0.00162339				YDR003W
YBL054W	-0.350035	0.000825697	TOD6			YHL032C
YBL053W	-0.194816	0.687687				YCL001W-B
YBL052C	0.0971792	0.611763	SAS3			YHL006C
YBL051C	0.286908	0.00308451	PIN4			YER079W
YBL050W	0.293208	0.00207194	SEC17			YBR214W
YBL049W	2.54305	9.84168e-68	MOH1			YCR071C
YBL048W	2.70426	3.14814e-39	RRT1			YIL006W
YBL046W	0.101494	0.602577	PSY4			YCR005C
YBL045C	0.00114939	0.992243	COR1			YHL046C
YBL044W	0.660514	0.29542				YGR121W-A
YBL043W	0.929611	2.92033e-15	ECM13			YBR228W
YBL042C	0.169495	0.0422985	FUI1			YBL010C
YBL041W	0.117111	0.220761	PRE7			YKL053W
YBL040C	0.3878	3.72685e-07	ERD2			YLR313C
YBL039W-B	1.18024	3.32828e-20				YOR377W
YBL039C	-0.322819	5.51017e-05	URA7			YKL051W
YBL039C-A	-0.264529	1.06764e-05				YIR009W
YBL038W	0.486058	2.71905e-08	MRPL16			YAL054C
YBL037W	0.223705	0.134081	APL3			YIL045W
YBL036C	-0.166052	0.127229				YOR059C
YBL035C	0.374674	0.0105436	POL12			YCL033C
YBL034C	-0.329347	0.0966492	STU1			YCR003W
YBL033C	0.455583	1.09003e-05	RIB1			YNL260C
YBL032W	-0.24414	0.00624349	HEK2			YGR092W
YBL031W	0.103982	0.541686	SHE1			YBR098W
YBL030C	-0.230174	0.000723876	PET9			YBR138C
YBL029C-A	0.587759	3.94049e-13				YMR081C
YBL029W	0.36646	0.0509621				YOR161C
YBL028C	0.0859768	0.319909				YPL236C
YBL027W	-0.42116	2.44673e-11	RPL19B			YLR237W
YBL026W	0.0108289	0.919585	LSM2			YLR457C
YBL025W	0.740166	3.55138e-11	RRN10			YMR154C
YBL024W	-0.250916	0.00544686	NCL1			YGR030C
YBL023C	0.128695	0.383337	MCM2			YGL154C
YBL022C	-0.0978811	0.416023	PIM1			YDR453C
YBL021C	0.792446	1.41963e-12	HAP3			YCR095C
YBL020W	-0.545256	3.17113e-08	RFT1			YLR101C
YBL019W	0.966412	3.59366e-09	APN2			YCR025C
YBL018C	0.395808	9.37813e-05	POP8			YKL123W
YBL017C	-0.0441839	0.715639	PEP1			YLR288C
YBL016W	0.451167	2.9115e-07	FUS3			YDR070C
YBL015W	0.25506	0.0565789	ACH1			YDR541C
YBL014C	-0.147818	0.348185	RRN6			YOR226C
YBL013W	0.674267	0.00116196	FMT1			YNL294C
YBL012C	0.662966	0.65488				YIR034C
YBL011W	-0.275811	0.0113708	SCT1			YMR316C-A
YBL010C	1.12761	7.8894e-19				YGL072C
YBL009W	-0.291603	0.0501063	ALK2			YBR169C
YBL008W-A	-0.532874	0.169981				YGL254W
YBL008W	-0.111633	0.512657	HIR1			YLL019C
YBL007C	-0.307843	0.000391136	SLA1			YNR014W
YBL006C	0.531595	1.0714e-09	LDB7			YHL040C
YBL006W-A	0.425711	0.192437				YKL168C
YBL005W	0.312765	0.0630297	PDR3			YOL107W
YBL005W-B	-1.05722	1.41245e-37				YDR462W
YBL005W-A	-1.03431	1.16285e-60				YNL230C
YBL004W	-0.584442	1.52867e-08	UTP20			YCL052C
YBL003C	-0.309055	1.16901e-05	HTA2			YJL023C
YBL002W	0.2189	0.000700283	HTB2			YOR064C
YBL001C	0.222951	0.00569602	ECM15			YIR005W
YBR001C	0.646006	1.26733e-05	NTH2			YML129C
YBR002C	0.0802682	0.459244	RER2			YPL025C
YBR003W	0.0345965	0.777904	COQ1			YPL144W
YBR004C	0.255567	0.0116932	GPI18			YKR052C
YBR005W	0.559762	5.20747e-09	RCR1			YPL034W
YBR006W	1.04786	3.65516e-12	UGA2			YBR269C
YBR007C	0.286365	0.0499157	DSF2			YBR194W
YBR008C	1.23555	3.1223e-25	FLR1			YIR015W
YBR009C	0.0292286	0.681599	HHF1			YAL034C
YBR010W	0.0764348	0.350165	HHT1			YOR227W
YBR011C	-0.672028	2.71497e-27	IPP1			YDR074W
YBR012W-A	-1.28422	9.06299e-27				YLR366W
YBR013C	3.62351e-06	0.999999				YLR346C
YBR014C	0.229922	0.0134616	GRX7			YLR168C
YBR015C	-0.664637	1.22661e-18	MNN2			YDL022W
YBR016W	0.17873	0.0265261				YLR385C
YBR017C	0.0877807	0.395703	KAP104			YPL071C
YBR018C	2.03103	8.52249e-05	GAL7			YPL119C
YBR019C	1.59128	0.000249867	GAL10			YDR285W
YBR020W	1.69854	6.67872e-09	GAL1			YDR078C
YBR021W	0.564748	1.60623e-06	FUR4			YBL111C
YBR022W	0.572009	3.43197e-07	POA1			YKR080W
YBR023C	0.313827	0.000587203	CHS3			YLR246W
YBR024W	0.373566	0.0294648	SCO2			YMR053C
YBR025C	-0.300113	1.14885e-05	OLA1			YKL093W
YBR026C	0.316528	0.00140866	ETR1			YAL048C
YBR027C	0.133096	0.533242				YIR032C
YBR028C	0.167077	0.143289				YOL154W
YBR029C	0.308112	0.000367574	CDS1			YGR042W
YBR030W	0.818716	7.60026e-12	RKM3			YPR046W
YBR031W	-0.337151	4.4276e-08	RPL4A			YCR028C
YBR032W	-1.95419	0.12439				YIL049W
YBR033W	2.38466	9.10564e-17	EDS1			YKL218C
YBR034C	-0.269231	0.0010794	HMT1			YNL159C
YBR035C	0.24149	0.00564842	PDX3			YJL079C
YBR036C	0.255977	0.000381373	CSG2			YPL064C
YBR037C	0.638854	2.88119e-08	SCO1			YPL267W
YBR038W	-0.143187	0.279096	CHS2			YCR083W
YBR039W	-0.138036	0.105349	ATP3			YCR082W
YBR040W	-0.0210855	0.981454	FIG1			YDR480W
YBR041W	-0.282556	0.00628115	FAT1			YBL112C
YBR042C	-0.699292	3.82934e-08	CST26			YDR350C
YBR043C	2.33845	1.55234e-136	QDR3			YLR042C
YBR044C	0.303457	0.02931	TCM62			YKR009C
YBR045C	0.239418	0.417851	GIP1			YNL012W
YBR046C	0.537598	0.000369756	ZTA1			YHR134W
YBR047W	1.37602	6.52234e-10	FMP23			YGR222W
YBR048W	-0.379696	1.43637e-10	RPS11B			YIL017C
YBR049C	-0.201608	0.104446	REB1			YCL025C
YBR050C	1.51987	5.42258e-06	REG2			YIL152W
YBR051W	2.26303	2.33559e-06				YMR117C
YBR052C	0.306542	0.000653318	RFS1			YBL103C
YBR053C	0.703362	7.68089e-10				YNL309W
YBR054W	-0.111404	0.217847	YRO2			YAL037W
YBR055C	0.412042	0.00159579	PRP6			YLL056C
YBR056W	0.622709	4.21763e-08				YDR126W
YBR056W-A	0.683369	8.92636e-11				YGL256W
YBR056C-B	1.2284	1.79789e-06				YFR012W-A
YBR057C	0.523924	8.45171e-06	MUM2			YGR205W
YBR058C	0.29764	0.0125159	UBP14			YLR466W
YBR058C-A	0.00870341	0.924963	TSC3			YGL247W
YBR059C	0.223166	0.0737154	AKL1			YBR006W
YBR060C	0.0543254	0.728361	ORC2			YGL243W
YBR061C	0.410239	0.0001201	TRM7			YLL067C
YBR062C	0.452449	0.000251642				YEL030W
YBR063C	1.17988	2.67996e-17				YJL127C-B
YBR064W	1.84799	0.339839				YOR026W
YBR065C	1.23935	1.71598e-28	ECM2			YGR230W
YBR066C	0.323566	0.00978487	NRG2			YLR176C
YBR067C	0.366954	8.53462e-10	TIP1			YGR008C
YBR068C	0.670137	4.8683e-30	BAP2			YOL083W
YBR069C	0.155338	0.0450755	TAT1			YFR014C
YBR070C	0.458329	8.9534e-05	ALG14			YGR068C
YBR071W	1.14591	6.61212e-52				YOL112W
YBR072W	2.10417	1.52908e-49	HSP26			YBR280C
YBR072C-A	-0.434402	0.221895				YDR516C
YBR073W	0.362736	0.000537062	RDH54			YKR076W
YBR074W	-0.0782203	0.459182				YGR238C
YBR076W	0.498807	0.524136	ECM8			YCR002C
YBR076C-A	0.795749	4.59581e-18				YKR049C
YBR077C	0.987728	6.73932e-31	SLM4			YOR041C
YBR079C	-0.359491	1.01158e-05	RPG1			YIL116W
YBR080C	0.034209	0.779967	SEC18			YGL117W
YBR081C	-0.0409761	0.82485	SPT7			YEL016C
YBR082C	0.0820112	0.215337	UBC4			YOR222W
YBR083W	0.890712	9.37357e-21	TEC1			YPL164C
YBR084W	-0.499012	6.10921e-09	MIS1			YMR135C
YBR084C-A	-0.491219	7.1243e-15	RPL19A			YHR193C-A
YBR085W	-0.307004	0.231753	AAC3			YHR090C
YBR085C-A	1.01297	3.8352e-55				YER104W
YBR086C	-0.8809	2.63023e-37	IST2			YJR109C
YBR087W	-0.055495	0.6847	RFC5			YDR001C
YBR088C	0.318254	0.000541481	POL30			YNL200C
YBR089W	2.20945	0.00105181				YGR110W
YBR089C-A	0.179885	0.0171573	NHP6B			YHR067W
YBR090C	0.245854	0.00183097				YAL014C
YBR091C	0.676061	3.97499e-10	TIM12			YDL087C
YBR092C	0.366538	7.25369e-07	PHO3			YOR284W
YBR093C	-2.71903	1.31121e-140	PHO5			YGR018C
YBR094W	-0.0617761	0.686208	PBY1			YDR260C
YBR095C	0.404025	0.00211727	RXT2			YDL216C
YBR096W	0.39388	1.19251e-07				YKR022C
YBR097W	-0.0226605	0.924901	VPS15			YCR077C
YBR098W	1.11702	3.06205e-08	MMS4			YDL218W
YBR099C	0.222393	0.559636				YOR032W-A
YBR101C	0.294872	0.000820997	FES1			YDR253C
YBR102C	0.477525	0.0012722	EXO84			YBR085C-A
YBR103W	0.381293	0.00744605	SIF2			YNL077W
YBR103C-A	1.9098	4.3319e-05				YNL222W
YBR104W	-0.412893	0.00031461	YMC2			YDR254W
YBR105C	0.808618	1.16876e-24	VID24			YGL136C
YBR106W	-0.916187	3.1231e-36	PHO88			YDL176W
YBR107C	0.813904	6.4892e-08	IML3			YPL175W
YBR108W	0.802925	5.47347e-07	AIM3			YOR368W
YBR109C	0.222737	0.00325836	CMD1			YDR077W
YBR109W-A	0.119428	0.514508				YOR077W
YBR110W	-0.0234221	0.850053	ALG1			YJL155C
YBR111C	0.330912	0.000113986	YSA1			YKL133C
YBR111W-A	0.837988	2.03902e-15	SUS1			YLR360W
YBR112C	-0.22743	0.0340894	CYC8			YLR254C
YBR113W	-0.0532977	0.918229				YLR460C
YBR114W	0.326228	0.0616257	RAD16			YDL115C
YBR115C	0.406418	1.36403e-05	LYS2			YML107C
YBR116C	0.483847	0.12362				YPR151C
YBR117C	0.888969	0.00668961	TKL2			YBR167C
YBR118W	-0.311903	2.17665e-08	TEF2			YHR150W
YBR119W	0.450576	0.00554935	MUD1			YNL334C
YBR120C	0.352725	0.00214417	CBP6			YBR175W
YBR121C	-0.250889	0.000414369	GRS1			YGR223C
YBR121C-A	-0.27109	0.000792679				YCR026C
YBR122C	0.317615	9.91723e-05	MRPL36			YDL106C
YBR123C	0.345378	0.0364792	TFC1			YOR289W
YBR124W	4.90689	5.2417e-23				YGR075C
YBR125C	0.10357	0.358055	PTC4			YOL017W
YBR126C	0.702977	5.79501e-22	TPS1			YMR164C
YBR126W-A	-0.0255321	0.738138				YPL277C
YBR126W-B	-0.0337883	0.638723				YKL017C
YBR127C	-0.410546	1.23625e-10	VMA2			YOR060C
YBR128C	0.333354	0.253071	ATG14			YNL305C
YBR129C	0.633811	8.62716e-09	OPY1			YLL041C
YBR130C	0.074505	0.558983	SHE3			YOR350C
YBR131W	0.295824	0.107776	CCZ1			YPL149W
YBR131C-A	6.5718	0.224044				YER015W
YBR132C	1.31022	7.03952e-26	AGP2			YJL107C
YBR133C	0.273208	0.00645875	HSL7			YNL282W
YBR134W	1.05445	0.113201				YIL113W
YBR135W	0.362766	2.5907e-06	CKS1			YLR092W
YBR136W	0.022209	0.922804	MEC1			YOL108C
YBR137W	-0.0124782	0.917022				YOR054C
YBR138C	1.1169	7.57316e-13				YNL116W
YBR139W	0.707542	4.76755e-19				YIL106W
YBR141C	-0.128719	0.451003				YBR077C
YBR141W-A	3.10818	5.9704e-140				YJL057C
YBR142W	-0.313912	0.00288289	MAK5			YOR152C
YBR143C	-0.161808	0.0361833	SUP45			YGR006W
YBR144C	-0.599912	0.180748				YGR247W
YBR145W	1.2054	4.79834e-27	ADH5			YDL113C
YBR146W	-0.174273	0.0402823	MRPS9			YJL119C
YBR147W	2.42626	9.27397e-29	RTC2			YPL213W
YBR148W	-0.0267996	0.958516	YSW1			YBR262C
YBR149W	0.786256	2.46141e-20	ARA1			YHR097C
YBR150C	0.480094	0.0271648	TBS1			YDR379W
YBR151W	-0.213691	0.00756687	APD1			YGL134W
YBR152W	0.538111	0.0013065	SPP381			YOR037W
YBR153W	0.650671	3.35781e-09	RIB7			YPL152W
YBR154C	-0.0872398	0.322369	RPB5			YGL096W
YBR155W	-0.579371	2.18031e-06	CNS1			YIL071C
YBR156C	0.721839	2.15487e-05	SLI15			YCR065W
YBR157C	-0.357318	0.0042236	ICS2			YDR031W
YBR158W	0.12221	0.115131	AMN1			YMR041C
YBR159W	-0.399828	2.03222e-05	IFA38			YCL002C
YBR160W	0.454053	5.12926e-06	CDC28			YGL212W
YBR161W	0.575176	4.10764e-06	CSH1			YDL025C
YBR162C	-0.582361	4.92267e-15	TOS1			YPL151C
YBR162W-A	0.0855761	0.246219	YSY6			YER109C
YBR163W	0.558363	0.000140328	EXO5			YFR005C
YBR164C	0.029589	0.768279	ARL1			YNL086W
YBR165W	0.670503	9.49563e-10	UBS1			YNL205C
YBR166C	0.481012	1.2571e-05	TYR1			YDR236C
YBR167C	1.00286	1.31295e-19	POP7			YJL162C
YBR168W	0.662316	3.65446e-07	PEX32			YLR462W
YBR169C	1.10131	2.38161e-15	SSE2			YLL046C
YBR170C	0.318194	0.014807	NPL4			YLR201C
YBR171W	-0.3604	2.45116e-06	SEC66			YAL060W
YBR172C	0.10475	0.325053	SMY2			YHR161C
YBR173C	0.268326	0.00051543	UMP1			YPL233W
YBR174C	0.785496	0.147557				YPL216W
YBR175W	1.00176	9.78303e-26	SWD3			YDR336W
YBR176W	0.198832	0.22094	ECM31			YJR159W
YBR177C	0.170609	0.0882129	EHT1			YBL019W
YBR178W	0.741468	0.235974				YGL223C
YBR179C	0.341287	0.0278159	FZO1			YNL329C
YBR180W	0.867897	0.239026	DTR1			YPR071W
YBR181C	-0.467011	1.38206e-10	RPS6B			YCR046C
YBR182C	0.136337	0.54066	SMP1			YDR479C
YBR182C-A	-0.472622	0.0428992				YDR381C-A
YBR183W	0.922588	1.86445e-22	YPC1			YDR318W
YBR184W	1.65046	4.97612e-12				YBR230W-A
YBR185C	0.434989	6.59149e-05	MBA1			YOR205C
YBR186W	0.415038	0.650142	PCH2			YBL091C-A
YBR187W	-0.449961	7.33178e-09	GDT1			YLR306W
YBR188C	0.917658	9.41893e-16	NTC20			YJR127C
YBR189W	-0.334213	1.49021e-06	RPS9B			YFL066C
YBR190W	-0.191997	0.0674651				YIL162W
YBR191W	-0.312392	8.77803e-07	RPL21A			YOR357C
YBR191W-A	-0.364871	3.52994e-05				YHR044C
YBR192W	-0.238058	0.0810958	RIM2			YKL202W
YBR193C	0.694851	4.15492e-10	MED8			YML099C
YBR194W	1.08553	2.37355e-22	AIM4			YIR023W
YBR195C	0.13658	0.393759	MSI1			YGL037C
YBR196C	-0.0859036	0.176837	PGI1			YGL079W
YBR196C-A	-0.135678	0.530824				YCR105W
YBR196C-B	0.118414	0.439945				YMR001C-A
YBR197C	0.915855	5.42738e-20				YBR253W
YBR198C	0.236129	0.0826501	TAF5			YOR297C
YBR199W	0.179039	0.042499	KTR4			YDR013W
YBR200W	0.35291	0.0017894	BEM1			YCR051W
YBR200W-A	4.24999	0.253844				YBR278W
YBR201W	-0.179324	0.15556	DER1			YER087C-A
YBR201C-A	0.925761	2.8219e-24				YLL037W
YBR202W	0.038127	0.755199	MCM7			YPL247C
YBR203W	0.819875	2.44305e-08	COS111			YMR040W
YBR204C	0.610132	1.37803e-05				YGL194C-A
YBR205W	-0.471695	3.42253e-07	KTR3			YNL162W-A
YBR206W	-0.573505	1.03737e-13				YJL013C
YBR207W	0.504703	2.67944e-08	FTH1			YHR159W
YBR208C	0.314519	0.0157238	DUR1,2			YIL100W
YBR209W	1.01668	0.143358				YPL123C
YBR210W	0.437831	8.35169e-06	ERV15			YKL159C
YBR211C	0.552589	4.34297e-05	AME1			YLL039C
YBR212W	0.655089	1.11352e-13	NGR1			YFR046C
YBR213W	-0.0226013	0.911854	MET8			YEL077C
YBR214W	1.13417	6.47567e-37	SDS24			YDR380W
YBR215W	0.400928	0.00978145	HPC2			YCR059C
YBR216C	0.701747	2.67837e-08	YBP1			YPL222W
YBR217W	1.54649	2.38902e-39	ATG12			YHL050C
YBR218C	-0.147999	0.0959661	PYC2			YGR019W
YBR219C	-0.562376	4.33326e-06				YDL044C
YBR220C	-0.426862	0.000458534				YDR073W
YBR221C	-0.104507	0.147961	PDB1			YER035W
YBR221W-A	1.03563	0.721909				YMR278W
YBR222C	0.399805	1.59918e-06	PCS60			YDR246W-A
YBR223C	1.42907	5.16659e-22	TDP1			YBL043W
YBR224W	0.909366	3.93271e-05				YPR199C
YBR225W	0.48638	0.000661533				YDR003W-A
YBR226C	-0.0240448	0.97007				YLR047C
YBR227C	0.328471	0.0333342	MCX1			YKL045W
YBR228W	1.12945	5.54351e-17	SLX1			YMR140W
YBR229C	-0.116015	0.320615	ROT2			YPL095C
YBR230C	0.502645	5.61852e-14	OM14			YBR201C-A
YBR230W-A	0.959767	2.34134e-22				YKL061W
YBR231C	-0.0776207	0.770903	SWC5			YDR016C
YBR232C	1	0.260685				YOR127W
YBR233W	0.363033	0.0046865	PBP2			YOR114W
YBR233W-A	0.149139	0.184681	DAD3			YDL160C
YBR234C	0.0828242	0.308935	ARC40			YBR183W
YBR235W	0.00754503	0.970045				YOR305W
YBR236C	0.250468	0.037455	ABD1			YLR177W
YBR237W	0.840113	1.00266e-06	PRP5			YOR066W
YBR238C	-0.440433	3.26568e-08				YPL274W
YBR239C	0.506295	1.63852e-05	ERT1			YMR293C
YBR240C	0.421827	0.141393	THI2			YJL077W-A
YBR241C	0.773624	4.68275e-11				YML023C
YBR242W	0.172433	0.0688102				YOL009C
YBR243C	-0.333409	0.00167263	ALG7			YHR204W
YBR244W	0.593545	1.44053e-07	GPX2			YBR188C
YBR245C	-0.251539	0.0417639	ISW1			YDR319C
YBR246W	0.631361	2.37038e-12	RRT2			YBR197C
YBR247C	-0.248426	0.0123839	ENP1			YBR256C
YBR248C	0.352886	0.00130404	HIS7			YCR088W
YBR249C	0.110636	0.11391	ARO4			YJL214W
YBR250W	0.8971	0.0216039	SPO23			YDR387C
YBR251W	0.442228	0.000307084	MRPS5			YHR142W
YBR252W	-0.0572064	0.541398	DUT1			YGR278W
YBR253W	0.94845	1.33124e-22	SRB6			YJR135C
YBR254C	0.237651	0.0359237	TRS20			YPL047W
YBR255W	0.499203	0.00898223	MTC4			YGL175C
YBR255C-A	0.82348	3.08037e-16				YBR224W
YBR256C	0.915618	8.60128e-30	RIB5			YLR036C
YBR257W	0.397515	0.00584469	POP4			YPL077C
YBR258C	0.723077	5.88077e-08	SHG1			YOR126C
YBR259W	0.613174	0.000207474				YFL060C
YBR260C	0.113631	0.434804	RGD1			YLL033W
YBR261C	0.216786	0.0337102	TAE1			YOL082W
YBR262C	0.983631	2.59471e-44	AIM5			YML068W
YBR263W	-1.57029	2.48983e-89	SHM1			YLL003W
YBR264C	0.486526	4.97435e-05	YPT10			YDR123C
YBR265W	0.445669	2.30026e-07	TSC10			YGR050C
YBR267W	-0.364037	0.000124211	REI1			YDR252W
YBR266C	0.747235	0.480684	SLM6			YPR082C
YBR268W	0.127519	0.115665	MRPL37			YDR179C
YBR269C	1.08604	4.9269e-34	FMP21			YPL241C
YBR270C	1.82015	4.8555e-26	BIT2			YDR256C
YBR271W	-0.222529	0.133003				YDL057W
YBR272C	0.532938	0.000197379	HSM3			YDR069C
YBR273C	-0.0412679	0.78983	UBX7			YML118W
YBR274W	0.402922	0.00374573	CHK1			YDR100W
YBR275C	-0.19006	0.339378	RIF1			YNL249C
YBR276C	-0.130964	0.328817	PPS1			YCL044C
YBR277C	1.67807	0.00818511				YMR023C
YBR278W	0.948105	5.14419e-14	DPB3			YKR102W
YBR279W	0.184145	0.0867094	PAF1			YJR062C
YBR280C	1.03698	7.49565e-08	SAF1			YHR198C
YBR281C	0.101964	0.465476	DUG2			YOL001W
YBR282W	0.518525	2.24789e-08	MRPL27			YMR019W
YBR283C	-0.33702	1.50961e-06	SSH1			YBR083W
YBR284W	1.77036	8.18275e-10				YDR014W
YBR285W	1.49923	0.000232762				YLR016C
YBR286W	-0.611663	1.3207e-22	APE3			YOR386W
YBR287W	-0.257043	0.00116472				YBR117C
YBR288C	0.204633	0.163552	APM3			YJL090C
YBR289W	0.17194	0.307304	SNF5			YER038C
YBR290W	0.309093	0.00706717	BSD2			YCR017C
YBR291C	1.54524	7.64986e-54	CTP1			YDR160W
YBR292C	0.716415	6.74883e-06				YPL174C
YBR293W	1.74734	1.62106e-61	VBA2			YGL051W
YBR294W	2.01197	1.67607e-08	SUL1			YFL034C-A
YBR295W	0.693209	2.9963e-05	PCA1			YJL118W
YBR296C	-0.129283	0.671303	PHO89			YDL183C
YBR296C-A	1.38171	0.000707167				YMR094W
YBR297W	1.91934	1.96565e-56	MAL33			YPR154W
YBR298C	3.36946	3.52333e-147	MAL31			YKR027W
YBR298C-A	3.53605	0.0028961				YLR426W
YBR299W	2.08866	1.88126e-07	MAL32			YCL057C-A
YBR300C	0.776562	0.0860395				YDL105W
YBR301W	-0.382857	0.299589	PAU24			YOL011W
YBR302C	0.408374	0.00030375	COS2			YMR064W
YDR293C	0.731543	1.76786e-17	SSD1			YDL170W
YDL183C	0.882095	2.6941e-05				YER077C
YDL112W	-0.161885	0.187233	TRM3			YLR133W
YDL033C	0.524759	9.8956e-06	SLM3			YGR127W
YDR036C	-0.0817995	0.578744	EHD3			YNL056W
YDR100W	0.896768	9.34042e-29	TVP15			YDR344C
YDR166C	-0.0209977	0.903783	SEC5			YLL051C
YDR351W	0.452234	0.000110338	SBE2			YMR199W
YDR420W	-0.411309	0.00052762	HKR1			YNL006W
YDR496C	-0.0923147	0.372517	PUF6			YOL100W
YDL248W	0.67853	1.81614e-09	COS7			YKL151C
YDL247W-A	1.21675	5.95687e-26				YCL029C
YDL247W	0.866184	0.00291972	MPH2			YJR097W
YDL246C	1.73696	0.445733	SOR2			YDR228C
YDL245C	2.05889	0.047934	HXT15			YPL219W
YDL244W	2.06783	6.4102e-15	THI13			YML041C
YDL243C	1.8777	1.67146e-45	AAD4			YOR018W
YDL242W	2.00849	3.62257e-11				YMR147W
YDL241W	0.84497	7.04825e-15				YFL044C
YDL240C-A	2.37851	0.380013				YDR490C
YDL240W	-0.137503	0.434236	LRG1			YDL247W
YDL239C	0.620019	0.00984679	ADY3			YOL105C
YDL238C	1.2045	6.68239e-11	GUD1			YKL162C
YDL237W	0.0964552	0.338142	AIM6			YLR255C
YDL236W	-0.233419	0.0115718	PHO13			YPL167C
YDL235C	-0.0944055	0.257476	YPD1			YKL201C
YDL234C	0.703428	1.96462e-07	GYP7			YCR094W
YDL233W	0.825765	2.05832e-07				YNR010W
YDL232W	0.668715	2.70756e-24	OST4			YHR006W
YDL231C	1.16883	1.99231e-29	BRE4			YCR030C
YDL230W	0.591125	0.000124931	PTP1			YKL062W
YDL229W	-0.445787	6.24762e-16	SSB1			YPL133C
YDL228C	-1.80735	0.248466				YLR245C
YDL227C	-0.800669	2.32002e-09	HO			YGR113W
YDL226C	0.101979	0.298271	GCS1			YJL211C
YDL225W	-0.070468	0.584559	SHS1			YLR104W
YDL224C	0.653338	3.85966e-15	WHI4			YJR096W
YDL223C	1.30584	9.67348e-11	HBT1			YEL060C
YDL222C	1.43009	1.26521e-09	FMP45			YHL044W
YDL221W	2.66541	4.18112e-18				YDL133W
YDL220C	0.601702	0.000311823	CDC13			YGR268C
YDL219W	0.0706298	0.515268	DTD1			YPL177C
YDL218W	1.01436	2.70118e-07				YGL006W-A
YDL217C	0.481572	2.44422e-06	TIM22			YLR049C
YDL216C	1.01846	4.27389e-09	RRI1			YBL113C
YDL215C	1.51366	5.48439e-35	GDH2			YLR431C
YDL214C	1.51658	0.00121389	PRR2			YJL004C
YDL213C	-0.00564652	0.960956	NOP6			YIL156W-A
YDL212W	0.0045008	0.960608	SHR3			YKL023W
YDL211C	0.688332	1.23618e-06				YFR045W
YDL210W	0.496502	0.132209	UGA4			YPL022W
YDL209C	0.849288	1.48274e-08	CWC2			YDL209C
YDL208W	-0.0388971	0.693206	NHP2			YER064C
YDL207W	0.113852	0.474792	GLE1			YJR022W
YDL206W	0.731886	6.32628e-07				YHR129C
YDL205C	-0.337693	3.88689e-05	HEM3			YDL241W
YDL204W	2.28061	1.76223e-116	RTN2			YGL073W
YDL203C	0.584037	6.6895e-07	ACK1			YMR197C
YDL202W	0.280929	0.0116089	MRPL11			YGR294W
YDL201W	-0.348666	0.000184362	TRM8			YLR091W
YDL200C	0.624513	1.82766e-07	MGT1			YBR237W
YDL199C	1.33976	3.78362e-11				YML011C
YDL198C	0.313008	4.13086e-05	GGC1			YDR241W
YDL197C	1.9825	1.0202e-70	ASF2			YML027W
YDL196W	1.4636	4.00073e-06				YBR111W-A
YDL195W	-0.472088	3.75355e-08	SEC31			YLR270W
YDL194W	0.630328	0.00829587	SNF3			YJR110W
YDL193W	0.0819372	0.567583	NUS1			YKL208W
YDL192W	-0.202562	0.00785912	ARF1			YIL111W
YDL191W	-0.380084	4.68385e-10	RPL35A			YDR370C
YDL190C	0.268929	0.0111864	UFD2			YPL008W
YDL189W	0.373342	0.00195671	RBS1			YGR239C
YDL188C	-0.00866942	0.936819	PPH22			YER163C
YDL187C	2.27022	6.49481e-82				YML005W
YDL186W	0.803603	0.234203				YOR264W
YDL185C-A	1	0.497802				YOR367W
YDL185W	-0.218434	0.00177708	VMA1			YOL055C
YDL184C	-0.477968	1.92919e-16	RPL41A			YMR111C
YDL182W	0.245988	0.00759739	LYS20			YNL211C
YDL181W	-0.440224	4.92939e-09	INH1			YCR035C
YDL180W	0.242578	0.0451424				YFR036W
YDL179W	0.587046	3.09253e-09	PCL9			YKR012C
YDL178W	0.150503	0.181149	DLD2			YFR027W
YDL177C	0.800839	6.20352e-09				YDR249C
YDL176W	1.01138	1.20914e-10				YDR309C
YDL175C	0.727293	8.16811e-06	AIR2			YLR141W
YDL174C	0.384975	0.000258475	DLD1			YOL155C
YDL173W	0.564166	1.40755e-10	PAR32			YIL146C
YDL172C	-0.483815	0.305127				YDR532C
YDL171C	-1.15709	7.97272e-44	GLT1			YOR044W
YDL170W	0.877242	6.13968e-10	UGA3			YGR073C
YDL169C	1.70579	6.72156e-15	UGX2			YDL233W
YDL168W	0.21897	0.0406539	SFA1			YPL036W
YDL167C	-0.158382	0.162427	NRP1			YCR037C
YDL166C	-0.0586835	0.672709	FAP7			YBR255C-A
YDL165W	-0.0902823	0.487516	CDC36			YKL219W
YDL164C	0.35893	0.0122621	CDC9			YGL229C
YDL163W	0.788497	0.616064				YOL097W-A
YDL162C	1.66879	0.00553514				YPR204W
YDL161W	-0.187329	0.0800732	ENT1			YCR092C
YDL160C-A	0.137112	0.274954				YBR203W
YDL160C	0.922682	3.95776e-38	DHH1			YDR275W
YDL159W-A	1.64386	0.306739				YIR038C
YDL159W	0.448526	0.0036521	STE7			YBR030W
YDL159C-B	0.624492	0.560402				YAR015W
YDL158C	-0.137829	0.559335				YKL167C
YDL157C	-0.134882	0.203428				YPL191C
YDL156W	0.515136	0.00557743				YNL015W
YDL155W	0.216021	0.0667637	CLB3			YNR001C
YDL154W	1.45737	4.66059e-13	MSH5			YER040W
YDL153C	-0.649663	0.000131241	SAS10			YDR111C
YDL152W	1.58496	0.128713				YCR011C
YDL151C	5.02762	0.0618176	BUD30			YNL158W
YDL150W	-0.253388	0.0190875	RPC53			YGR096W
YDL149W	0.53842	0.0246789	ATG9			YBR107C
YDL148C	-0.105795	0.417414	NOP14			YOR025W
YDL147W	0.313153	5.87494e-05	RPN5			YMR062C
YDL146W	-0.195386	0.292937	LDB17			YIL107C
YDL145C	-0.302997	0.000134616	COP1			YJL066C
YDL144C	-0.0737805	0.471133				YDR220C
YDL143W	-0.129489	0.15597	CCT4			YPR081C
YDL142C	0.687316	2.79324e-08	CRD1			YBR105C
YDL141W	0.295108	0.00993242	BPL1			YLR102C
YDL140C	-0.543073	4.63348e-10	RPO21			YBL088C
YDL139C	0.505188	0.00781347	SCM3			YCR090C
YDL138W	0.343302	0.00933361	RGT2			YGL194C
YDL137W	0.041572	0.611003	ARF2			YLR137W
YDL136W	-0.361591	3.58554e-08	RPL35B			YCR067C
YDL135C	-0.00497192	0.963189	RDI1			YPL076W
YDL134C	0.101373	0.278356	PPH21			YAR027W
YDL133C-A	-0.0291682	0.686833	RPL41B			YNR006W
YDL133W	0.856565	4.1067e-12				YBR108W
YDL132W	0.290632	0.00976224	CDC53			YDR313C
YDL131W	0.215542	0.0145732	LYS21			YGR111W
YDL130W-A	1.29623	9.40499e-69	STF1			YPL089C
YDL130W	-0.236716	1.51773e-05	RPP1B			YJL093C
YDL129W	-0.942324	2.83317e-11				YDL177C
YDL128W	-0.101526	0.171743	VCX1			YJR100C
YDL127W	-0.0701858	0.645036	PCL2			YLR011W
YDL126C	-0.192783	0.0119574	CDC48			YJR161C
YDL125C	0.702287	1.34166e-29	HNT1			YEL075W-A
YDL124W	0.67825	5.02688e-23				YML064C
YDL123W	0.560241	6.58243e-11	SNA4			YML091C
YDL122W	-0.0613698	0.562136	UBP1			YIL065C
YDL121C	0.12112	0.134553				YDR435C
YDL120W	0.235058	0.0113706	YFH1			YBR076C-A
YDL119C	1.18171	3.16895e-19				YOL138C
YDL118W	1	0.274082				YCL031C
YDL117W	0.178021	0.15401	CYK3			YDR191W
YDL116W	0.0654453	0.635641	NUP84			YOR319W
YDL115C	1.00493	1.95405e-13	IWR1			YOL133W
YDL114W-A	0.794416	0.0179891				YJR149W
YDL114W	0.415038	0.635075				YLR414C
YDL113C	0.986596	1.46915e-10	ATG20			YBL021C
YDL111C	0.331835	3.58952e-05	RRP42			YGR031W
YDL110C	1.30022	3.79207e-69	TMA17			YOR219C
YDL109C	1.93153	4.56161e-34				YLL026W
YDL108W	0.394057	0.00221459	KIN28			YLR464W
YDL107W	0.727333	4.67699e-07	MSS2			YJR035W
YDL106C	1	4.68141e-13	PHO2			YDR499W
YDL105W	0.878908	1.25773e-06	NSE4			YPR084W
YDL104C	0.0121975	0.982864	QRI7			YMR073C
YDL103C	0.114759	0.369155	QRI1			YKL142W
YDL102W	-0.0115647	0.950487	POL3			YER081W
YDL101C	0.173267	0.225862	DUN1			YBR149W
YDL100C	-0.0705666	0.432437	GET3			YHR171W
YDL099W	0.181245	0.225059	BUG1			YKL186C
YDL098C	0.0206444	0.897784	SNU23			YFR003C
YDL097C	0.0826353	0.417414	RPN6			YGR207C
YDL096C	2.25298	0.000458782	OPI6			YNL133C
YDL095W	-0.704743	3.51173e-21	PMT1			YOR130C
YDL094C	2.85108	7.1775e-16				YJL044C
YDL093W	0.20396	0.11235	PMT5			YDR357C
YDL092W	0.173809	0.0250459	SRP14			YOL073C
YDL091C	0.341087	0.0123839	UBX3			YPL002C
YDL090C	0.24235	0.122676	RAM1			YGL208W
YDL089W	0.0169963	0.936819	NUR1			YLR410W-A
YDL088C	0.41906	3.2442e-05	ASM4			YLR356W
YDL087C	1.02241	6.20069e-14	LUC7			YFL042C
YDL086W	0.518878	3.64987e-14				YGL003C
YDL086C-A	0.198203	0.47022				YJL126W
YDL085C-A	-0.138607	0.13812				YNL176C
YDL085W	1.9001	8.72301e-06	NDE2			YER026C
YDL084W	-0.491916	5.87543e-13	SUB2			YGR102C
YDL083C	-0.376537	6.40776e-09	RPS16B			YHR016C
YDL082W	-0.466429	1.07253e-12	RPL13A			YDR255C
YDL081C	-0.431158	8.76653e-15	RPP1A			YGR189C
YDL080C	0.634026	4.85622e-06	THI3			YJR006W
YDL079C	1.45348	2.50627e-10	MRK1			YPR174C
YDL078C	-0.0275516	0.782416	MDH3			YBR241C
YDL077C	0.715516	5.36227e-06	VAM6			YER018C
YDL076C	0.463833	8.99211e-06	RXT3			YLR275W
YDL075W	-0.328801	4.88809e-08	RPL31A			YPL135W
YDL074C	-0.0539238	0.682838	BRE1			YHR002W
YDL073W	0.352964	0.023404				YIR025W
YDL072C	0.754389	1.08332e-30	YET3			YKL150W
YDL071C	0.541091	0.0419692				YJL059W
YDL070W	-0.787428	3.21597e-15	BDF2			YMR167W
YDL069C	0.427181	0.0192667	CBS1			YKL137W
YDL068W	-0.286522	0.553194				YLR204W
YDL067C	0.46135	3.39251e-14	COX9			YDR263C
YDL066W	-1.05925	1.23714e-44	IDP1			YKR005C
YDL065C	0.254152	0.0908108	PEX19			YMR100W
YDL064W	-0.116086	0.229243	UBC9			YMR121C
YDL063C	-0.368617	0.0012354				YNR049C
YDL062W	1.4344	0.0354049				YMR025W
YDL061C	-0.0947806	0.129584	RPS29B			YOR185C
YDL060W	-0.273428	0.0080481	TSR1			YHR101C
YDL059C	0.281005	0.144579	RAD59			YMR299C
YDL058W	-0.686471	1.40339e-05	USO1			YKL033W
YDL057W	0.898247	2.54771e-06				YHR199C
YDL056W	0.344927	0.0107314	MBP1			YGR065C
YDL055C	-0.114901	0.118608	PSA1			YLR098C
YDL054C	0.452274	4.47319e-05	MCH1			YIL007C
YDL053C	0.315581	0.000911255	PBP4			YCL011C
YDL052C	0.0699816	0.460929	SLC1			YDR005C
YDL051W	-0.0652752	0.500572	LHP1			YJL159W
YDL050C	0.584964	0.832891				YKL065C
YDL049C	0.142704	0.485754	KNH1			YGL248W
YDL048C	-0.930276	2.36764e-34	STP4			YJR136C
YDL047W	0.542252	5.20594e-11	SIT4			YMR315W
YDL046W	0.14955	0.0234349	NPC2			YJL025W
YDL045W-A	0.341005	5.02778e-05	MRP10			YPL067C
YDL045C	0.182525	0.113056	FAD1			YGL185C
YDL044C	0.933742	4.28316e-09	MTF2			YPL124W
YDL043C	0.40406	0.00243153	PRP11			YOL119C
YDL042C	-0.25795	0.0480024	SIR2			YJL210W
YDL041W	1.29311	0.00275605				YLR205C
YDL040C	-0.0514186	0.63443	NAT1			YDL072C
YDL039C	-2.43798	1.06301e-166	PRM7			YDR214W
YDL037C	-3.68669	2.44938e-244	BSC1			YLR355C
YDL036C	-0.267117	0.0736529	PUS9			YIL089W
YDL035C	-0.354554	0.0131048	GPR1			YPR061C
YDL034W	0.643858	0.663764				YJR082C
YDL032W	3.72893	4.17805e-15				YPL119C-A
YDL031W	-0.466324	2.87823e-05	DBP10			YPR134W
YDL030W	-0.15539	0.341133	PRP9			YGL098W
YDL029W	0.426785	1.07351e-06	ARP2			YLR265C
YDL028C	0.317482	0.0428373	MPS1			YLL020C
YDL027C	0.639525	5.44024e-07				YOR179C
YDL026W	0.914531	0.0312692				YJL108C
YDL025C	0.977312	2.94658e-14	RTK1			YDR364C
YDL025W-A	0.0971294	0.738484				YAR033W
YDL024C	0.808776	0.0335434	DIA3			YCR069W
YDL022C-A	1.52607	0.00830256				YHR116W
YDL023C	0.310132	0.773275				YIL061C
YDL022W	1.07618	1.09815e-55	GPD1			YMR270C
YDL021W	1.71845	8.41856e-11	GPM2			YNL198C
YDL020C	1.2577	2.38333e-49	RPN4			YOL137W
YDL019C	-0.539004	3.0463e-05	OSH2			YPL155C
YDL018C	0.422066	1.40635e-05	ERP3			YJR083C
YDL017W	0.49581	0.0100214	CDC7			YMR294W
YDL016C	0.0239286	0.853484				YMR168C
YDL015C	0.0611534	0.450895	TSC13			YML095C
YDL014W	0.0888346	0.293975	NOP1			YBL025W
YDL013W	0.162798	0.289255	SLX5			YKR087C
YDL012C	0.346094	3.752e-07				YKL005C
YDL011C	1.19264	0.838054				YNL214W
YDL010W	0.441416	0.000192702	GRX6			YCL058C
YDL009C	0.652077	0.187222				YDR173C
YDL008W	0.23784	0.0368581	APC11			YNL094W
YDL007C-A	2.53605	0.0979458				YGL053W
YDL007W	-0.16469	0.100045	RPT2			YML117W
YDL006W	0.016761	0.903783	PTC1			YLR283W
YDL005C	0.508773	4.93226e-05	MED2			YLR093C
YDL004W	0.027726	0.758917	ATP16			YPR111W
YDL003W	0.149887	0.242216	MCD1			YJL146W
YDL002C	0.196949	0.0998319	NHP10			YDL206W
YDL001W	0.57605	2.09759e-06	RMD1			YDR293C
YDR001C	1.02548	5.58539e-25	NTH1			YDR109C
YDR002W	-0.274183	0.000361174	YRB1			YOL086W-A
YDR003W	1.13822	5.46328e-30	RCR2			YJL003W
YDR003W-A	0.928679	3.07663e-25				YGL250W
YDR004W	0.661975	1.77078e-06	RAD57			YKR021W
YDR005C	0.761293	2.94536e-12	MAF1			YMR155W
YDR006C	0.144522	0.185417	SOK1			YLR146C
YDR007W	2.23463	3.97908e-64	TRP1			YDL107W
YDR008C	1.77964	1.86534e-23				YDL175C
YDR009W	1.50567	9.07366e-08	GAL3			YDR151C
YDR010C	2.83399	8.41433e-06				YLR128W
YDR011W	0.294437	0.000648952	SNQ2			YEL064C
YDR012W	-0.310715	1.12142e-08	RPL4B			YGR179C
YDR013W	0.948218	4.15237e-12	PSF1			YNL223W
YDR014W	0.890613	4.50411e-07	RAD61			YGL018C
YDR014W-A	0.330149	0.54721	HED1			YHL023C
YDR015C	-4.61257	0.171743				YBR258C
YDR016C	0.924241	1.92718e-20	DAD1			YBR156C
YDR017C	0.0946253	0.494915	KCS1			YLL027W
YDR018C	2.9645	1.09858e-29				YPL055C
YDR019C	2.14535	9.43967e-84	GCV1			YKR095W-A
YDR020C	0.298949	0.00554935	DAS2			YLR455W
YDR021W	-0.130993	0.38773	FAL1			YIL124W
YDR022C	0.694414	9.68453e-07	CIS1			YJL071W
YDR023W	-0.117175	0.124552	SES1			YMR137C
YDR024W	0.268148	0.039735	FYV1			YLR194C
YDR025W	-0.179461	0.0073924	RPS11A			YBR292C
YDR026C	0.50608	2.73373e-05				YIL177C
YDR027C	-0.0161798	0.924901	VPS54			YKL087C
YDR028C	0.249793	0.0207552	REG1			YGL066W
YDR029W	0.332577	0.75901				YDL077C
YDR030C	0.54404	0.0244574	RAD28			YDR461C-A
YDR031W	0.980013	2.91331e-17	MIC14			YOR083W
YDR032C	0.349708	2.15268e-06	PST2			YGL240W
YDR033W	-0.294799	2.42607e-06	MRH1			YAL053W
YDR034C	0.575125	5.76403e-07	LYS14			YMR198W
YDR034C-D	-0.0410038	0.785434				YER180C
YDR034C-C	-0.00250382	0.992957				Q0160
YDR034C-A	5.14309	0.0824978				YPR107C
YDR034W-B	3.19707	1.48486e-90				YHR001W-A
YDR035W	0.19001	0.0178723	ARO3			YHL048W
YDR037W	-0.071158	0.362624	KRS1			YJL222W
YDR038C	-0.189518	0.127005	ENA5			YPR017C
YDR039C	0.274501	0.0923499	ENA2			YGR036C
YDR040C	0.398757	1.00826e-05	ENA1			YGR040W
YDR041W	0.447568	9.13055e-06	RSM10			YDR137W
YDR042C	-0.300866	0.207068				YCR053W
YDR043C	0.60298	5.07118e-09	NRG1			YNR035C
YDR044W	-0.0919926	0.338441	HEM13			YFR034C
YDR045C	0.337068	5.8483e-05	RPC11			YCR009C
YDR046C	0.575282	1.15734e-15	BAP3			YBR139W
YDR047W	0.357916	0.00035154	HEM12			YKL171W
YDR048C	2.41238	7.55522e-06				YMR201C
YDR049W	0.366239	0.00582369	VMS1			YGR080W
YDR050C	-0.221142	0.000453277	TPI1			YDR067C
YDR051C	0.093485	0.429691	DET1			YEL012W
YDR052C	0.200152	0.0997148	DBF4			YER098W
YDR053W	1.56477e-06	0.999999				YLR046C
YDR054C	0.265428	0.00257259	CDC34			YHR195W
YDR055W	1.14457	1.50261e-72	PST1			YGR104C
YDR056C	-0.291747	0.000583633				YDL234C
YDR057W	0.12224	0.418726	YOS9			YBR053C
YDR058C	1.31109	5.44405e-11	TGL2			YBR126C
YDR059C	1.28157	3.77986e-54	UBC5			YKR007W
YDR060W	-0.375007	2.22948e-05	MAK21			YER038W-A
YDR061W	0.126433	0.341844				YDL125C
YDR062W	-0.450808	5.54553e-08	LCB2			YDR259C
YDR063W	-0.000280218	0.999999	AIM7			YOL140W
YDR064W	-0.228409	0.000295675	RPS13			YBR216C
YDR065W	0.672546	1.81365e-06	RRG1			YFL024C
YDR066C	0.47893	0.00457063	RTR2			YLR242C
YDR067C	0.706602	7.99533e-09	OCA6			YNL032W
YDR068W	0.322464	0.0117192	DOS2			YGL085W
YDR069C	0.898247	3.04067e-08	DOA4			YMR255W
YDR070C	1.10478	1.49995e-15	FMP16			YER034W
YDR071C	0.137769	0.0879681	PAA1			YNL157W
YDR072C	0.250633	0.00591977	IPT1			YOR034C-A
YDR073W	0.930803	1.51456e-22	SNF11			YGR182C
YDR074W	1.0814	8.07923e-31	TPS2			YOL003C
YDR075W	-0.0829893	0.522649	PPH3			YLR142W
YDR076W	1.22822	5.17014e-09	RAD55			YGL041W-A
YDR077W	1.00947	3.33821e-88	SED1			YPL196W
YDR078C	1.0729	5.78917e-08	SHU2			YDR349C
YDR079W	0.194272	0.0575099	PET100			YBR193C
YDR079C-A	0.407018	2.95795e-06	TFB5			YDR022C
YDR080W	0.255175	0.158223	VPS41			YNL076W
YDR081C	-0.0998197	0.563337	PDC2			YOL146W
YDR082W	1.65704	3.19786e-40	STN1			YBR295W
YDR083W	-0.223437	0.0265261	RRP8			YJR119C
YDR084C	0.342794	0.000307438	TVP23			YEL006W
YDR085C	1.18532	8.4242e-15	AFR1			YLR412W
YDR086C	-0.14543	0.0430831	SSS1			YCR004C
YDR087C	-0.114277	0.228335	RRP1			YMR022W
YDR088C	0.288676	0.0568113	SLU7			YCL057W
YDR089W	0.665837	1.39159e-06				YOR075W
YDR090C	0.540606	4.35533e-07				YER180C-A
YDR091C	-0.0207852	0.827513	RLI1			YLR078C
YDR092W	0.346313	2.11244e-05	UBC13			YMR253C
YDR093W	-0.479643	9.40378e-06	DNF2			YDR162C
YDR094W	-0.853044	2.19697e-21				YDL211C
YDR095C	-1.9386	0.00925358				YMR124W
YDR096W	0.532033	2.92713e-06	GIS1			YDL142C
YDR097C	-0.0432696	0.799837	MSH6			YMR284W
YDR098C	-0.0107447	0.916632	GRX3			YLR166C
YDR098C-B	-0.876055	0.0308047				YOR352W
YDR098C-A	-1.10802	0.0221414				YPL209C
YDR099W	-0.0228099	0.784956	BMH2			YCL001W
YDR101C	-0.0368307	0.707497	ARX1			YOR238W
YDR102C	-0.0510737	0.913548				YCL047C
YDR103W	0.0585749	0.672706	STE5			YBL089W
YDR104C	0.321928	0.192515	SPO71			YBR056W-A
YDR105C	0.253613	0.00847929	TMS1			YMR181C
YDR106W	0.822827	0.0119332	ARP10			YAL002W
YDR107C	-0.176259	0.395596	TMN2			YER190W
YDR108W	0.511095	0.00240643	GSG1			YDR323C
YDR109C	0.730739	2.17658e-05				YGR235C
YDR110W	-0.379571	0.0107931	FOB1			YKR046C
YDR111C	0.815621	4.20151e-11	ALT2			YLR451W
YDR112W	1.02647	0.265647	IRC2			YGL116W
YDR113C	0.54396	2.40279e-05	PDS1			YLR160C
YDR114C	0.979823	0.217415				YER095W
YDR115W	0.509417	1.8269e-11				YPL188W
YDR116C	0.261621	0.0114959	MRPL1			YCR052W
YDR117C	0.130942	0.353849	TMA64			YDL248W
YDR118W	0.519878	0.00407767	APC4			YER159C
YDR118W-A	0.393537	0.012854				YDL124W
YDR119W	-0.420776	8.07787e-06	VBA4			YLR094C
YDR119W-A	2.41603	3.50527e-142				YGL056C
YDR120C	-0.493815	3.31068e-06	TRM1			YBR091C
YDR121W	0.261492	0.00636823	DPB4			YMR319C
YDR122W	0.652329	1.87109e-07	KIN1			YOR249C
YDR123C	0.902291	2.7621e-17	INO2			YLR326W
YDR124W	2.12628	1.56098e-40				YJL103C
YDR125C	1.35055	5.7915e-14	ECM18			YBL013W
YDR126W	1.05059	8.03151e-19	SWF1			YIL050W
YDR127W	0.293951	0.000787874	ARO1			YKR073C
YDR128W	0.0960846	0.561355	MTC5			YLR130C
YDR129C	0.0363907	0.69123	SAC6			YDR065W
YDR130C	1.17748	2.11036e-19	FIN1			YLR392C
YDR131C	1.20381	7.96424e-17				YER050C
YDR132C	0.451828	0.00359378				YBR165W
YDR133C	1.22647	6.04939e-128				YBR068C
YDR135C	-0.259738	0.00260435	YCF1			YML057W
YDR136C	0.407659	0.476759	VPS61			YLR079W
YDR137W	0.708389	7.29e-09	RGP1			YDL232W
YDR138W	0.208439	0.166931	HPR1			YJL070C
YDR139C	-0.00448829	0.960271	RUB1			YNL240C
YDR140W	0.547488	2.38125e-09	MTQ2			YAL044W-A
YDR141C	0.308392	0.0217935	DOP1			YOR155C
YDR142C	0.18463	0.161292	PEX7			YPL206C
YDR143C	-0.091863	0.364255	SAN1			YKL149C
YDR144C	-0.630926	1.64439e-13	MKC7			YKL189W
YDR145W	0.171426	0.102439	TAF12			YDR089W
YDR146C	0.00790921	0.960956	SWI5			YAL010C
YDR147W	1.16092	3.87641e-18	EKI1			YML076C
YDR148C	0.17815	0.0591909	KGD2			YJL151C
YDR149C	0.584964	0.753289				YJL147C
YDR150W	-0.542621	0.000649459	NUM1			YNL261W
YDR151C	0.726883	1.38666e-13	CTH1			YDR451C
YDR152W	0.216459	0.0256515	GIR2			YKL184W
YDR153C	0.158323	0.127581	ENT5			YBR168W
YDR154C	-0.500103	4.71464e-20				YDR004W
YDR155C	-0.442455	1.24907e-15	CPR1			YER045C
YDR156W	0.300313	1.8223e-06	RPA14			YER053C
YDR157W	0.287556	0.000766447				YOR298C-A
YDR158W	0.0226662	0.929515	HOM2			YLR085C
YDR159W	-0.400033	0.0133724	SAC3			YPR101W
YDR160W	0.884796	1.57639e-10	SSY1			YIL108W
YDR161W	-0.249256	0.0138906				YDR444W
YDR162C	0.688359	4.51238e-10	NBP2			YPR155C
YDR163W	0.314386	0.0168242	CWC15			YMR127C
YDR164C	0.151764	0.271431	SEC1			YDR354W
YDR165W	0.0796551	0.476629	TRM82			YMR011W
YDR167W	0.0093784	0.950791	TAF10			YIL084C
YDR168W	-0.0586409	0.575028	CDC37			YBR212W
YDR169C	0.530153	2.61253e-06	STB3			YLR423C
YDR169C-A	1.50933	2.21882e-08				YPL099C
YDR170C	-0.38629	0.000264504	SEC7			YDL224C
YDR170W-A	-0.0515741	0.738548				YPL163C
YDR171W	1.61313	5.71873e-44	HSP42			YDR257C
YDR172W	-0.10257	0.234203	SUP35			YDR404C
YDR173C	0.736072	7.27748e-05	ARG82			YDR122W
YDR174W	0.410701	1.2384e-07	HMO1			YDR371W
YDR175C	0.217021	0.0503677	RSM24			YDR497C
YDR176W	0.136176	0.389546	NGG1			YNL074C
YDR177W	0.367035	1.07711e-05	UBC1			YDR204W
YDR178W	0.176512	0.0285314	SDH4			YBR153W
YDR179C	0.899803	6.56507e-08	CSN9			YPL138C
YDR179W-A	0.255391	0.113962				YPR120C
YDR180W	-0.908659	6.4838e-06	SCC2			YMR066W
YDR181C	0.541647	0.000486855	SAS4			YPL046C
YDR182W	-0.125175	0.205223	CDC1			YHR162W
YDR182W-A	-0.026914	0.897953				YNL245C
YDR183W	0.426711	0.00268428	PLP1			YPL096C-A
YDR183C-A	-0.0998167	0.646593				YAR029W
YDR184C	-0.0495264	0.67044	ATC1			YMR251W-A
YDR185C	0.495389	0.00256741	UPS3			YIL042C
YDR186C	0.515405	1.52159e-07				YLR289W
YDR187C	-0.400535	0.75238				YPR093C
YDR188W	-0.364031	8.08866e-05	CCT6			YOR316C-A
YDR189W	-0.0197602	0.879929	SLY1			YNL058C
YDR190C	0.162403	0.0921167	RVB1			YJL184W
YDR191W	0.794886	3.93987e-05	HST4			YBR001C
YDR192C	0.237499	0.105549	NUP42			YOL018C
YDR193W	1.2115	0.234621				YKR029C
YDR194C	-0.21447	0.0259263	MSS116			YJL072C
YDR194W-A	7.81771	4.29148e-06				YDR489W
YDR195W	0.577879	0.00012697	REF2			YGL052W
YDR196C	0.420782	0.000298014	CAB5			YNL134C
YDR197W	0.235088	0.0737847	CBS2			YLR119W
YDR198C	0.185512	0.181875	RKM2			YNL047C
YDR199W	-1.27301	0.420919				YLR035C
YDR200C	0.399171	0.0139922	VPS64			YKL138C-A
YDR201W	0.19702	0.150009	SPC19			YOR079C
YDR202C	0.529871	0.000123732	RAV2			YOR189W
YDR203W	1.73697	0.00995442				YNL051W
YDR204W	0.650996	3.53174e-09	COQ4			YOL026C
YDR205W	0.227604	0.0451424	MSC2			YKR050W
YDR206W	0.638853	2.12013e-09	EBS1			YKL121W
YDR207C	0.501439	0.000459748	UME6			YLR298C
YDR208W	0.00568156	0.964647	MSS4			YER170W
YDR209C	-0.618907	0.581089				YAR018C
YDR210W	0.236346	0.007484				YJR056C
YDR210W-B	-0.090447	0.414484				YDL027C
YDR210W-A	-0.0523226	0.609424				YMR187C
YDR210C-D	-0.904215	0.00393416				YIL161W
YDR210C-C	-0.995192	0.00873921				YER051W
YDR211W	0.0669867	0.550521	GCD6			YBR037C
YDR212W	-0.283091	0.000601249	TCP1			YDR206W
YDR213W	0.611694	0.00017539	UPC2			YOL148C
YDR214W	0.754105	1.47072e-28	AHA1			YGR174C
YDR215C	2.01355	2.59341e-05				YGR183C
YDR216W	2.61742	1.89098e-81	ADR1			YOL135C
YDR217C	-0.22542	0.178437	RAD9			YOR275C
YDR218C	0.604072	0.408473	SPR28			YJL135W
YDR219C	0.48437	0.00153287	MFB1			YMR152W
YDR220C	0.811212	1.61088e-05				YOR278W
YDR221W	-0.0264606	0.853484	GTB1			YKL115C
YDR222W	0.320135	0.00754962				YDL080C
YDR223W	1.22651	0.00345154	CRF1			YJL149W
YDR224C	0.0549221	0.453517	HTB1			YLR290C
YDR225W	0.0448191	0.54631	HTA1			YBR129C
YDR226W	-0.616133	1.67686e-18	ADK1			YLR370C
YDR227W	0.180836	0.337897	SIR4			YLL010C
YDR228C	0.86755	5.40597e-12	PCF11			YOR030W
YDR229W	0.168054	0.271048	IVY1			YBR246W
YDR230W	0.405257	0.652529				YOR031W
YDR231C	1.19856	8.60081e-25	COX20			YDL194W
YDR232W	-0.303677	2.00242e-05	HEM1			YPR173C
YDR233C	-0.164786	0.00594783	RTN1			YNL326C
YDR234W	0.133058	0.14784	LYS4			YDR306C
YDR235W	0.427853	0.00164724	PRP42			YMR037C
YDR236C	0.973979	6.52176e-29	FMN1			YJR111C
YDR237W	-0.152904	0.150171	MRPL7			YGR156W
YDR238C	-0.147105	0.0915328	SEC26			YBL102W
YDR239C	-0.194391	0.305326				YCL017C
YDR240C	-0.0844681	0.664155	SNU56			YGL114W
YDR241W	0.839833	4.57955e-09	BUD26			YDR503C
YDR242W	1.51262	7.77312e-22	AMD2			YHR071W
YDR243C	0.388515	0.0366815	PRP28			YOR273C
YDR244W	0.550782	0.000215256	PEX5			YGL181W
YDR245W	-0.460456	8.95792e-08	MNN10			YJL053W
YDR246W	0.605275	8.37457e-10	TRS23			YCR061W
YDR246W-A	0.929729	8.86939e-05				YDL200C
YDR247W	0.233505	0.053954	VHS1			YOL122C
YDR248C	0.0376802	0.762916				YML037C
YDR249C	0.831287	3.40056e-09				YDR286C
YDR250C	2.01763	6.94374e-06				YJL204C
YDR251W	0.196296	0.0761765	PAM1			YNR061C
YDR252W	0.901038	8.52598e-10	BTT1			YML053C
YDR253C	1.01378	7.14362e-06	MET32			YBR056W
YDR254W	1.01185	2.97544e-09	CHL4			YOR035C
YDR255C	0.775425	2.85006e-07	RMD5			YOR104W
YDR256C	0.899176	0.00429665	CTA1			YKL069W
YDR257C	0.652985	5.63021e-07	RKM4			YGL162W
YDR258C	1.33056	1.22266e-33	HSP78			YMR021C
YDR259C	0.702136	0.000313701	YAP6			YLR300W
YDR260C	1.01858	1.69136e-28	SWM1			YOR111W
YDR261C	-0.34328	0.000605546	EXG2			YDR511W
YDR261W-B	-0.000390974	0.999999				YDL239C
YDR261W-A	0.00906089	0.929999				YNL213C
YDR261C-D	-1.01904	0.0313909				YGR246C
YDR261C-C	-1.00972	0.00837966				YKR020W
YDR262W	0.571919	6.78511e-11				YKR078W
YDR263C	0.767248	6.41109e-05	DIN7			YOR389W
YDR264C	0.308484	0.000147028	AKR1			YLR247C
YDR265W	1.21706	4.31913e-23	PEX10			YPR057W
YDR266C	0.181866	0.0933505				YGR039W
YDR267C	0.190684	0.104815	CIA1			YDR493W
YDR268W	0.582595	1.99769e-05	MSW1			YGR046W
YDR269C	3.16992	0.000845256				YPL007C
YDR270W	-0.00539718	0.980131	CCC2			YAL017W
YDR271C	2.79586	1.86001e-19				YNL083W
YDR272W	0.26416	0.0283067	GLO2			YFR043C
YDR273W	0.60073	0.0951513	DON1			YOR244W
YDR274C	1.14136	0.128939				YBR259W
YDR275W	0.819349	5.96004e-13	BSC2			YNL003C
YDR276C	-0.0993555	0.0929738	PMP3			YGL211W
YDR277C	2.32193	6.61005e-68	MTH1			YMR236W
YDR278C	-0.71989	0.41872				YDR213W
YDR279W	0.0292139	0.858716	RNH202			YOL071W
YDR280W	0.0980243	0.36043	RRP45			YKL048C
YDR281C	-3.91046	1.62942e-209	PHM6			YLL009C
YDR282C	0.24914	0.188174				YBR204C
YDR283C	0.317794	0.0368382	GCN2			YMR172W
YDR284C	0.55833	1.59989e-10	DPP1			YLR144C
YDR285W	1.07325	2.43913e-05	ZIP1			YNL300W
YDR286C	0.624169	2.31629e-06				YGL198W
YDR287W	0.407986	0.000768858	INM2			YCR087C-A
YDR288W	0.428998	0.000194445	NSE3			YGR076C
YDR289C	0.383329	0.0155354	RTT103			YFL016C
YDR290W	0.807353	0.79168				YJL127C
YDR291W	0.4842	0.00108685	HRQ1			YLR209C
YDR292C	-0.153079	0.153316	SRP101			YML100W-A
YDR294C	-0.162834	0.100045	DPL1			YGL045W
YDR295C	0.233224	0.228578	HDA2			YMR302C
YDR296W	0.312759	0.00250624	MHR1			YDR246W
YDR297W	0.0825608	0.333737	SUR2			YOR074C
YDR298C	0.00632765	0.944778	ATP5			YKL011C
YDR299W	-0.118564	0.375908	BFR2			YDR043C
YDR300C	-0.440685	0.000345642	PRO1			YJL024C
YDR301W	-0.196236	0.219183	CFT1			YNL082W
YDR302W	0.215776	0.0417614	GPI11			YCR048W
YDR303C	-0.276586	0.0399679	RSC3			YER186C
YDR304C	-0.116033	0.123457	CPR5			YDL220C
YDR305C	0.450123	0.000680451	HNT2			YDR373W
YDR306C	0.62873	2.82749e-05				YMR136W
YDR307W	0.370859	0.000602172				YLR103C
YDR308C	0.55319	3.24924e-10	SRB7			YEL025C
YDR309C	0.831079	4.11055e-28	GIC2			YGR024C
YDR310C	-0.34711	0.00947456	SUM1			YPR051W
YDR311W	-0.0425245	0.806565	TFB1			YOR036W
YDR312W	-0.172732	0.180998	SSF2			YAL020C
YDR313C	0.802391	2.09838e-10	PIB1			YLR108C
YDR314C	0.563312	0.0055532	RAD34			YPL193W
YDR315C	0.542022	0.00898979	IPK1			YGL227W
YDR316W	0.354979	0.0338086	OMS1			YLR131C
YDR316W-B	-0.964216	0.0157333				YJL082W
YDR316W-A	-1.33503	0.00747386				YIL119C
YDR317W	-0.512734	0.203737	HIM1			YML098W
YDR318W	0.960678	1.4404e-09	MCM21			YGR170W
YDR319C	0.916806	6.31508e-17				YBL059W
YDR320C	0.450203	0.00090749	SWA2			YGR295C
YDR320C-A	0.451282	1.10862e-10	DAD4			YIL003W
YDR320W-B	1.34445	0.000421283				YOL038C-A
YDR321W	-0.131792	0.111268	ASP1			YNL180C
YDR322W	0.10612	0.420995	MRPL35			YJR074W
YDR322C-A	0.0961654	0.285534	TIM11			YBR244W
YDR323C	0.682309	0.00278059	PEP7			YDR466W
YDR324C	-0.273033	0.00985989	UTP4			YGL080W
YDR325W	0.164387	0.311706	YCG1			YLR383W
YDR326C	-0.733939	3.24147e-13	YSP2			YLR118C
YDR327W	-0.206449	0.859957				YOL067C
YDR328C	0.293593	6.24283e-05	SKP1			YPR121W
YDR329C	0.295574	0.0227615	PEX3			YDL230W
YDR330W	0.294743	0.0344159	UBX5			YOR285W
YDR331W	0.366499	0.000277281	GPI8			YOR334W
YDR332W	1.13865	1.43936e-11	IRC3			YPL109C
YDR333C	0.236676	0.0909188				YNL101W
YDR334W	-0.737269	2.02646e-06	SWR1			YNL199C
YDR335W	0.0919604	0.585332	MSN5			YNL257C
YDR336W	0.967608	6.02601e-13				YHR112C
YDR337W	-0.063512	0.622385	MRPS28			YJR112W
YDR338C	0.29818	0.0567557				YBL029C-A
YDR339C	0.221804	0.0203741	FCF1			YDL179W
YDR340W	0.897431	0.218779				YPR094W
YDR341C	-0.237319	0.00435793				YLR437C
YDR342C	1.78003	8.52455e-183	HXT7			YKR030W
YDR343C	3.26717	1.73388e-48	HXT6			YLR019W
YDR344C	0.87496	8.33541e-08				YKR019C
YDR345C	-0.711663	9.05336e-26	HXT3			YDR383C
YDR346C	-0.465568	1.98244e-09	SVF1			YOR213C
YDR347W	-0.292959	0.000998522	MRP1			YLR382C
YDR348C	0.0291128	0.80739				YIL135C
YDR349C	0.695106	2.0075e-17	YPS7			YNL053W
YDR350C	1.05985	2.51897e-17	ATP22			YJR033C
YDR352W	-0.0566941	0.602487				YMR252C
YDR353W	0.0977893	0.161411	TRR1			YPL060W
YDR354W	0.655635	4.03672e-17	TRP4			YHR132W-A
YDR354C-A	4.34871	0.0474263				YDL203C
YDR355C	4.90209	0.0775087				YGL005C
YDR356W	-0.388123	0.0368168	SPC110			YIL153W
YDR357C	0.781698	2.572e-20	CNL1			YIL036W
YDR358W	1.2009	1.01632e-16	GGA1			YER028C
YDR359C	0.379974	0.00741272	EAF1			YPL004C
YDR360W	0.234467	0.823119	OPI7			YEL062W
YDR361C	-0.0695449	0.516568	BCP1			YDR268W
YDR362C	0.289648	0.10359	TFC6			YGL004C
YDR363W	0.529086	0.00226858	ESC2			YGR237C
YDR363W-A	0.198118	0.00158808	SEM1			YPR135W
YDR364C	0.745748	2.10408e-10	CDC40			YOR103C
YDR365C	-0.729632	1.04061e-15	ESF1			YPL170W
YDR365W-B	-0.824644	9.82977e-06				YFL021W
YDR365W-A	-0.894563	1.19967e-08				YJR019C
YDR366C	0.14202	0.8606				YJL115W
YDR367W	0.00431396	0.971142	KEI1			YPL162C
YDR368W	-0.223301	0.017608	YPR1			YGL161C
[truncated: 4,765 more rows]
