# Supplementary material for: Decapping factor Dcp2 controls mRNA abundance and translation to adjust metabolism and filamentation to nutrient availability
Source: eLife journal article supplement (doi:10.7554/elife.85545), 2023-06-02
Supplement: fig3-figsupp1-data1 [file Figure 3 – figure supplement 1 – source data 1.xlsx]

## Sheet: CAGE & RNA-Seq data statistics
	CAGE Mapping Statistics
	CAGE tags	overall alignment rate	aligned exactly 1 time	TSS tags	merged
WT_1	23551554	0.9436	17270233 (73.33%)	17207260	32155052
WT_2	20845410	0.9468	15011050 (72.01%)	14947792
dcp2_1	20606352	0.949	15955461 (77.43%)	15915442	31499426
dcp2_2	20023956	0.9486	15740335 (78.61%)	15583984
xrn1_1	20530079	0.9523	17055954 (83.08%)	17025294	34793859
xrn1_2	21243201	0.9525	17807193 (83.83%)	17768565
	CAGE TSS and TC statistics
	TSS (+strand)	TSS (-strand)	Total TSS	Total consensus TCs	TCs assigned to gene	% of assigned TCs
WT	80155	77474	157629	8250	6055	73.4
dcp2	110661	107428	218089	11465	7016	61.2
xrn1	99560	93338	192898	9344	6315	67.6
	RNA-Seq statistics
Strain	Reads	Average input read length	Uniquely mapped reads	Uniquely mapped reads %	After PCR duplicates removal
WT_1	65902896	100	49893216	0.7571	34942866
WT_2	77364598	100	56665631	0.7324	38868526
dcp2_1	68151332	100	51038061	0.7489	39396984
dcp2_2	72376376	100	55212626	0.7629	40754624
xrn1_1	113359129	100	93395983	0.8239	74656930
xrn1_2	122248143	100	105214053	0.8607	81884076

## Sheet: Normalized CAGE reads
GeneID	wt.1	wt.2	dcp2.1	dcp2.2	xrn1.1	xrn1.2
YAL001C	13.793	11.317	31.1121	29.654	20.5902	20.8835
YAL002W	20.1303	14.6328	27.3367	30.4381	21.1604	19.6086
YAL003W	1993.71	1868.53	1493.03	1374.92	1888.41	2149.85
YAL005C	301.582	266.057	644.895	887.767	642.669	683.874
YAL007C	277.599	282.492	231.418	251.917	263.238	259.83
YAL008W	36.8434	34.2392	53.1353	51.3243	48.2762	48.202
YAL009W	21.8078	16.9394	25.7986	27.8719	22.3642	22.644
YAL010C	12.2397	10.5241	19.0868	22.3118	16.5989	14.6913
YAL011W	7.70418	6.84785	11.3262	11.9757	8.86964	8.62052
YAL012W	1223.72	1057.52	1446.12	1591.98	994.287	993.848
YAL013W	9.94088	10.3078	21.8834	18.3199	14.1914	18.5766
YAL014C	49.6423	48.4395	124.379	131.946	97.1859	92.5188
YAL015C	6.64797	6.6316	19.2965	22.0979	11.974	13.3557
YAL016C-A	0	0	0	0	0	0
YAL016W	157.874	137.029	172.131	184.553	234.665	218.366
YAL017W	17.7693	19.3902	32.7901	35.3567	26.8623	23.6154
YAL018C	0	0	5.94277	3.99189	2.34412	1.76053
YAL019W	52.8109	46.6375	70.8937	76.63	73.1112	75.217
YAL020C	30.7546	22.6339	67.3281	76.8438	55.8154	46.8058
YAL021C	41.6896	30.0585	39.2922	47.5462	36.3655	38.1245
YAL022C	30.1333	26.8147	47.8917	44.9087	41.1171	38.0638
YAL023C	69.2755	47.5024	33.9087	31.2223	29.3965	24.6474
YAL024C	15.8433	14.4165	17.0592	17.4645	18.943	19.9122
YAL025C	103.261	90.0312	112.563	121.753	103.648	111.399
YAL026C	59.3346	50.1695	47.1227	49.1145	51.1272	49.4769
YAL027W	17.8315	13.5515	31.8812	29.7253	25.5319	24.8295
YAL028W	1.429	1.58582	16.1503	18.7476	8.80629	8.74193
YAL029C	40.6334	39.9338	56.2815	59.1655	51.6973	48.0199
YAL030W	54.5506	78.0655	55.093	43.982	41.1805	49.3555
YAL031C	22.9883	23.4989	54.4637	60.8763	38.1395	39.2173
YAL032C	7.08288	6.55952	11.7457	10.1223	10.7703	11.4131
YAL033W	77.601	77.8492	83.5483	84.5425	117.206	121.719
YAL034C	10.6864	10.3799	38.3134	37.2814	22.6809	23.9189
YAL034W-A	17.3965	16.0744	20.7647	22.7395	16.4088	19.6693
YAL035W	142.962	120.81	148.639	178.209	192.788	237.853
YAL036C	140.539	127.586	140.948	147.486	176.886	171.318
YAL037W	4.59766	4.25287	7.34107	10.051	6.8423	7.58848
YAL038W	6093.02	3829.46	2597.34	3743.89	5123.23	4110.59
YAL039C	27.4617	25.8056	50.3387	53.4628	46.3122	41.5242
YAL040C	284.123	274.419	524.432	512.031	294.219	293.28
YAL041W	18.7013	20.4715	25.7287	27.9432	29.7133	30.2932
YAL042W	254.424	220.573	241.067	271.306	256.206	237.307
YAL043C	12.0533	12.0378	13.983	14.0429	17.6126	19.6693
YAL044C	75.0537	83.76	143.046	141.142	193.802	200.093
YAL044W-A	197.699	192.1	400.612	387.213	245.879	265.354
YAL045C	3.29292	2.0904	5.24362	2.99392	0	0
YAL046C	32.0593	34.3834	25.5889	25.6621	28.953	31.7502
YAL047C	7.3314	6.34327	14.5423	14.1142	12.7343	11.3524
YAL048C	10.3758	11.1007	35.307	36.7824	24.2015	22.7047
YAL049C	59.3346	53.9899	66.6289	65.082	78.1796	78.6167
YAL051W	11.7427	11.7495	19.5063	17.7496	11.9107	14.1449
YAL053W	114.879	100.988	206.948	207.792	123.541	115.466
YAL054C	0	0	4.54447	4.56216	0	0
YAL055W	5.65388	4.68537	13.2838	11.6192	6.52552	8.19556
YAL056W	22.1185	16.7953	22.2329	20.9574	28.8263	25.0723
YAL058W	12.7989	11.8215	14.1228	15.0409	11.7206	14.0235
YAL059C-A	0	0	0	0	0	0
YAL059W	110.095	91.5449	115.779	122.822	98.1996	109.881
YAL060W	29.7605	29.626	106.201	118.616	77.9895	78.1917
YAL061W	2.17457	3.45997	8.87919	8.05506	2.85096	2.97469
YAL062W	25.4114	22.1294	16.43	17.9635	9.05971	11.6559
YAL063C	0	0	0	0	0	0
YAL063C-A	5.9024	6.34327	50.8281	55.4587	15.5219	17.7267
YAL064W-B	2.48522	3.02747	15.8707	16.324	4.11805	4.67451
YAL066W	0	0	0	0	0	0
YAL067C	2.05031	3.02747	2.65677	2.56621	5.70191	5.94937
YAR002C-A	292.573	357.962	249.876	224.187	273.565	297.408
YAR002W	28.2073	25.6614	36.146	33.5033	25.5319	29.2005
YAR003W	13.793	14.6328	20.4152	21.4564	41.2438	48.3842
YAR007C	27.6481	24.5081	28.1058	27.0878	25.5319	26.2258
YAR008W	23.9202	20.2552	38.4532	38.9922	30.0301	32.5394
YAR014C	41.876	37.9155	78.864	83.2594	82.9945	83.7769
YAR015W	60.7636	53.0528	120.044	126.03	207.043	200.579
YAR018C	14.29	13.4794	20.3452	18.8189	17.9927	18.9409
YAR019C	2.858	2.59497	5.10379	4.41959	3.73792	3.70318
YAR019W-A	0	0	0	0	0	0
YAR020C	0	0	6.0826	6.48682	0	0
YAR023C	5.46749	3.96454	26.3579	26.2324	14.2548	14.2056
YAR027W	32.1215	32.9418	56.2815	53.1776	22.4909	34.4821
YAR028W	36.3464	38.8525	43.9765	48.8293	34.0848	40.6136
YAR029W	0	0	0	0	0	0
YAR030C	0	0	2.23728	1.49696	0	0
YAR033W	23.6096	23.4989	52.9955	55.2449	27.9394	27.8649
YAR035W	0	0	0	0	0	0
YAR042W	18.6392	15.6419	28.6651	29.155	18.8163	20.155
YAR075W	0	0	3.70549	3.63547	0	0
YBL001C	158.433	155.698	134.027	111.203	103.015	107.392
YBL002W	664.299	635.913	699.848	654.812	647.04	622.923
YBL003C	893.747	953.941	587.145	549.954	496.89	544.428
YBL004W	81.0803	65.8114	74.0399	87.8215	74.0615	68.3571
YBL005W	11.6184	11.8936	13.2838	13.5439	10.897	11.4131
YBL005W-A	19.4469	16.2907	21.394	22.5256	9.69325	9.59184
YBL006C	113.078	98.8253	225.266	226.682	165.609	175.749
YBL006W-A	0	0	1.81779	2.06723	0	0
YBL007C	130.163	119.441	120.813	120.327	135.959	119.109
YBL008W	20.8137	18.5252	21.2541	22.4544	27.1791	26.59
YBL009W	11.8048	8.64991	7.41098	8.26891	7.91932	8.37769
YBL010C	10.6243	7.28034	37.3346	37.7091	18.4362	20.8228
YBL011W	57.8435	46.5654	47.4722	49.3996	40.1035	39.5815
YBL013W	3.85209	2.73914	3.49575	3.27905	3.54786	2.42831
YBL014C	19.9439	17.8765	19.6461	19.3179	20.907	21.0656
YBL015W	20.3167	22.3456	30.6926	33.0044	27.4959	26.4686
YBL016W	38.3967	30.6351	65.4404	69.2878	34.9084	37.3353
YBL017C	43.6778	47.7187	61.4552	64.3692	44.665	39.8851
YBL018C	70.1454	80.0117	108.368	111.203	92.4977	92.276
YBL019W	3.60357	4.39704	6.92158	6.48682	6.20875	6.9814
YBL020W	72.4442	66.316	57.7497	57.3121	96.0456	94.0972
YBL021C	21.5593	20.6156	40.4108	37.2814	29.2065	29.4433
YBL022C	35.4765	32.5813	40.6905	44.6949	59.3633	61.6792
YBL023C	17.2102	15.2094	19.1567	18.2486	19.4499	19.3658
YBL024W	115.873	97.1674	91.4487	99.6546	136.846	129.429
YBL025W	18.7634	15.7861	38.5231	40.9881	43.2078	42.4348
YBL026W	82.6336	88.3012	57.1904	47.3324	62.1509	64.836
YBL027W	3408.67	3338.58	2322.92	2102.37	3089.99	3362.97
YBL028C	208.634	150.436	213.59	209.788	201.658	206.832
YBL029C-A	72.3821	71.7943	129.622	112.985	98.263	101.868
YBL029W	8.63614	7.35243	7.41098	8.98175	12.7976	11.838
YBL030C	1622.29	1425.15	1341.25	1320.6	1528.43	1396.16
YBL031W	4.41127	4.18079	5.87285	5.56013	4.37147	5.70654
YBL032W	40.5091	33.2301	36.4257	40.703	46.5023	44.1346
YBL033C	25.8463	25.3731	43.7667	44.98	21.984	29.8076
YBL034C	17.4587	14.2003	21.9533	23.5236	26.6089	23.8582
YBL035C	11.5563	11.6774	17.3389	19.603	15.8386	18.0909
YBL036C	37.4026	35.5367	24.4702	25.5196	37.2525	36.9711
YBL037W	19.6954	16.4348	29.2244	26.0898	26.8623	22.1584
YBL038W	33.6126	34.5276	64.0421	66.4364	36.0488	39.3994
YBL039C	147.498	137.822	130.321	142.781	218.7	202.764
YBL039W-B	17.7693	18.3811	39.0125	35.7844	36.619	34.6035
YBL040C	212.362	234.557	474.862	537.978	318.167	353.866
YBL041W	172.474	174.945	244.772	241.794	213.061	242.042
YBL042C	175.208	147.914	203.592	211.855	203.685	177.874
YBL043W	6.7101	7.28034	19.5063	22.0267	8.48952	10.4418
YBL045C	256.661	207.742	265.886	295.043	269.13	254.366
YBL046W	11.0592	10.1636	15.1016	15.825	14.3815	14.1449
YBL047C	121.465	108.773	79.2136	81.406	100.417	91.6689
YBL049W	2.98226	2.23456	32.9998	29.654	3.92798	3.94601
YBL050W	98.042	85.9225	127.595	128.596	138.81	141.996
YBL051C	70.1454	55.2153	107.599	116.406	117.713	113.645
YBL052C	14.7249	13.1911	17.3389	19.9594	18.3728	21.9762
YBL054W	26.4676	21.1923	22.2329	22.3831	21.2238	20.4586
YBL055C	23.2368	24.7243	21.8834	22.3118	19.0697	19.7301
YBL056W	86.5478	76.4076	68.167	69.5016	87.556	87.2372
YBL057C	74.3081	70.3526	78.1649	65.1533	73.3646	71.3925
YBL058W	68.6542	62.856	90.0504	99.9397	91.2306	93.9758
YBL059C-A	92.9473	82.6788	162.552	159.747	154.585	155.837
YBL060W	8.69827	6.70368	25.5889	25.5908	14.6983	14.0842
YBL061C	28.3315	25.3731	31.8812	36.2834	34.2748	32.6608
YBL063W	7.14501	7.0641	10.2076	7.69864	15.1417	17.1196
YBL064C	84.746	91.2566	242.745	228.678	178.153	182.124
YBL066C	25.5356	20.904	44.4659	49.8986	31.804	28.5327
YBL067C	42.7458	42.3846	29.1545	26.5175	73.0478	70.2997
YBL068W	111.462	109.854	132.349	133.586	149.897	147.338
YBL069W	54.9855	51.5391	38.6629	48.6155	41.8774	43.1026
YBL071W-A	78.9058	80.228	289.448	273.943	141.914	156.93
YBL072C	2216.94	2188.21	1408.3	1373.99	1964.37	1997.9
YBL074C	4.97044	5.04578	22.0931	22.9534	11.6572	12.3844
YBL075C	0	0	5.1737	5.84526	2.21741	1.27487
YBL076C	218.389	183.594	198.628	195.389	238.467	230.872
YBL078C	19.6954	18.2369	69.2158	64.9394	34.2115	33.875
YBL079W	76.4205	68.9831	93.5462	79.6239	104.725	92.7009
YBL080C	7.70418	7.71284	15.8707	16.6091	10.2001	12.5058
YBL081W	111.276	94.2841	88.5123	98.5854	100.67	97.254
YBL082C	65.7962	72.2268	125.427	124.247	105.992	103.81
YBL084C	13.7308	14.1282	21.9533	22.8821	17.1057	15.177
YBL085W	42.373	37.0505	69.6353	69.6442	45.1718	52.0266
YBL086C	8.38762	7.20826	4.96396	5.98783	3.54786	2.97469
YBL087C	683.001	922.658	433.193	341.734	563.666	531.315
YBL088C	10.2515	8.14534	26.9172	24.7354	19.0064	18.8194
YBL089W	28.4558	26.0939	54.6036	59.0942	44.6016	40.735
YBL090W	114.879	114.611	208.696	219.483	140.837	157.173
YBL091C	53.4944	36.1855	56.8408	65.5097	58.4129	63.9254
YBL091C-A	18.2042	18.8136	49.1502	52.7499	47.1992	50.8125
YBL092W	4983.49	4917.33	2574.62	2272.88	3627.43	3567.38
YBL093C	73.1897	63.4327	60.1268	66.4364	53.6613	61.1328
YBL094C	0	0	0	0	0	0
YBL095W	17.3965	18.6694	28.1757	34.2875	18.4362	17.3017
YBL097W	3.35505	3.67621	6.43217	6.34425	5.4485	5.403
YBL098W	31.5002	21.841	9.858	12.5459	16.2188	15.177
YBL099W	515.994	345.708	291.196	417.794	336.476	257.219
YBL100W-A	1.86392	0.864991	5.87285	3.56418	2.0907	1.45699
YBL101C	18.9498	16.2186	21.1842	22.5256	32.5643	31.2646
YBL102W	17.8936	19.2461	49.4298	49.1858	21.9207	24.9509
YBL103C	14.29	15.2094	52.8557	56.4567	25.2151	29.9897
YBL104C	7.89058	7.0641	12.2351	11.4767	9.56654	8.19556
YBL105C	44.5476	38.8525	72.1522	74.2776	69.8801	68.9034
YBL106C	1.73965	1.6579	0	0	0	0
YBL107C	74.743	71.4339	88.9318	93.0965	86.6057	94.8864
YBR001C	14.9113	18.0927	29.4342	33.7885	17.4225	16.634
YBR002C	31.3759	29.8422	49.7794	47.4037	52.2675	48.5056
YBR003W	63.9944	57.8103	70.684	71.854	134.502	129.672
YBR004C	57.2843	57.3057	69.3556	69.858	69.8801	72.0602
YBR005W	57.1601	68.1902	151.785	162.527	65.3819	73.3351
YBR006W	13.1095	11.2449	20.6948	20.9574	13.5579	14.5699
YBR007C	7.02075	6.91993	19.0868	17.4645	13.3045	12.3237
YBR008C	22.1806	15.714	82.2199	92.8827	46.3122	39.6422
YBR009C	689.09	741.37	931.267	911.718	564.109	668.394
YBR010W	429.446	512.796	418.86	355.207	240.557	234.757
YBR011C	935.748	798.099	514.504	516.308	796.114	824.959
YBR014C	55.9175	50.0974	90.7496	110.632	66.9025	66.4144
YBR015C	228.889	177.467	138.082	159.889	270.271	247.749
YBR016W	97.4828	89.3104	130.811	129.237	106.119	109.517
YBR017C	56.6009	53.6295	66.2793	63.7276	70.9571	71.1496
YBR018C	0	0	1.46821	1.71081	0	0
YBR021W	14.9113	12.9749	37.1947	36.2121	17.6126	16.5732
YBR022W	37.3404	33.7347	69.7052	66.6503	61.9608	59.2509
YBR023C	132.027	109.638	232.817	240.511	183.285	158.387
YBR024W	9.00893	8.57783	10.697	10.2649	12.4809	9.2883
YBR025C	406.334	372.09	296.09	302.956	405.406	406.075
YBR026C	49.7044	44.5471	89.7008	86.9661	62.2776	70.7247
YBR028C	42.1245	37.4109	54.8832	65.0107	54.3582	58.4617
YBR029C	48.9588	47.4304	63.7624	53.9618	41.2438	39.278
YBR030W	23.9202	23.9314	58.0294	59.0942	47.0725	46.6843
YBR031W	1314.74	1326.97	910.712	850.272	1142.41	1063.54
YBR033W	0	0	2.58685	3.77804	0	0
YBR034C	142.217	117.999	123.33	127.669	150.847	153.227
YBR035C	91.891	92.5541	107.319	99.2269	123.985	116.377
YBR036C	99.8437	96.2303	196.95	233.811	123.541	121.416
YBR037C	27.4617	25.6614	59.3578	54.1043	45.3619	44.256
YBR038W	66.2933	63.4327	91.9381	95.0925	73.5547	66.5965
YBR039W	223.359	192.605	182.548	172.293	242.838	250.663
YBR041W	76.9797	72.443	44.396	42.8415	53.598	57.4296
YBR042C	47.8405	44.0425	25.8685	26.6601	48.4663	49.5376
YBR043C	25.0386	22.3456	246.24	253.699	77.2926	75.217
YBR044C	10.8728	9.51491	17.4787	16.1814	13.2411	14.6913
YBR046C	17.2102	16.2186	30.7626	26.8027	20.2735	22.3405
YBR047W	7.39353	7.42451	18.6673	19.9594	7.98268	8.92406
YBR048W	4686.75	5409.08	3123.8	2951.72	3566.86	3619.1
YBR049C	23.4853	22.2014	30.1333	32.8618	34.1481	31.3253
YBR050C	0	0	0	0	0	0
YBR051W	3.10653	3.82038	7.69064	7.19965	1.64722	2.06407
YBR052C	76.3584	82.5346	125.427	120.042	79.8268	89.3013
YBR053C	31.5002	32.8697	86.2051	89.0333	68.9932	77.7061
YBR054W	234.978	230.592	137.732	146.559	181.828	172.107
YBR055C	15.5948	13.984	34.9575	39.3486	32.5009	32.7822
YBR056C-B	0	0	3.07626	2.06723	1.71057	2.00336
YBR056W	27.151	28.9772	38.8727	36.925	33.6413	31.5681
YBR056W-A	42.3109	47.8629	74.3895	77.6992	54.485	58.2796
YBR057C	25.9084	23.9314	54.3239	52.4648	39.4066	45.2881
YBR058C	38.0239	31.5001	52.9256	54.8172	45.8687	49.2948
YBR058C-A	388.689	379.947	516.252	521.226	321.525	346.156
YBR059C	39.0801	40.0779	78.7242	77.3428	57.3993	52.8766
YBR060C	11.8048	13.047	20.2054	26.2324	13.4945	14.6913
YBR061C	33.7369	30.4189	50.5485	50.3976	32.881	34.6642
YBR062C	17.7693	15.8582	30.413	28.0858	16.3455	18.6373
YBR065C	29.015	25.9497	94.5949	110.632	66.649	65.5038
YBR066C	13.3581	12.9028	34.7477	38.1368	11.784	11.3524
YBR067C	352.529	334.824	634.827	799.304	432.902	409.839
YBR068C	208.51	192.965	344.611	354.494	186.579	174.596
YBR069C	200.682	165.718	283.016	332.538	181.448	177.874
YBR070C	57.0358	57.2336	115.849	111.844	76.3423	79.4666
YBR071W	54.3642	43.8262	212.821	244.503	89.4567	93.5508
YBR072W	4.53553	6.91993	46.1438	38.7783	23.6946	20.9442
YBR073W	49.1452	42.4567	93.2665	97.231	58.8564	64.0468
YBR074W	95.4325	90.3195	92.7072	84.5425	88.9499	85.5981
YBR076C-A	3.35505	4.9737	5.03387	4.49087	1.77393	1.69982
YBR077C	59.521	62.4235	160.664	174.93	112.835	102.778
YBR078W	969.982	1002.81	633.15	800.16	969.769	882.328
YBR079C	40.7576	39.7896	30.2732	26.874	47.3259	52.1481
YBR080C	70.2696	71.7943	78.864	79.1962	86.289	83.5947
YBR081C	10.5622	12.182	24.6101	32.5054	25.722	24.7081
YBR082C	481.201	423.413	534.29	541.97	442.342	456.887
YBR083W	17.8936	19.174	63.1332	62.6584	28.3195	32.1145
YBR084C-A	2389.17	2419.96	1327.4	1229.5	2631.62	2743.63
YBR084W	115.563	100.339	78.6543	71.2837	159.4	143.271
YBR085C-A	231.995	286.24	1082.07	1078.38	432.078	469.211
YBR085W	14.8492	13.6957	10.4872	10.2649	12.861	12.3844
YBR086C	185.273	174.44	77.1162	70.9986	125.632	117.409
YBR087W	29.2635	30.4189	41.5994	43.6256	48.7197	53.3622
YBR088C	122.211	106.394	196.111	195.531	138.113	149.523
YBR089C-A	135.134	159.663	228.832	209.146	134.122	151.466
YBR091C	59.2725	78.2096	127.874	113.412	77.546	96.4648
YBR092C	95.8053	84.7692	125.707	121.04	107.766	100.775
YBR093C	51.0713	51.6112	5.38345	5.56013	23.0611	22.7654
YBR094W	14.9113	15.4978	10.6271	9.97972	16.6623	18.6373
YBR095C	16.0918	13.4074	33.4892	38.6358	21.5406	21.7334
YBR096W	93.0715	110.07	154.722	168.158	82.551	91.426
YBR097W	15.222	15.4257	21.5338	19.4604	22.0474	20.6407
YBR098W	3.97635	4.18079	21.1842	23.6662	12.4809	12.3844
YBR101C	25.8463	22.9223	29.3643	27.2304	19.0697	19.1837
YBR102C	14.6007	11.0286	26.3579	31.2223	21.2238	20.6407
YBR103C-A	0	0	1.18855	1.63953	0	0
YBR103W	10.7486	7.49659	9.78809	11.6192	8.48952	8.07415
YBR104W	57.6571	52.8366	42.6481	43.8395	63.1645	61.4364
YBR105C	34.1718	29.1935	75.6479	81.5485	53.1545	50.5089
YBR106W	464.674	448.714	257.147	246.071	371.448	398.486
YBR107C	9.13319	7.28034	28.3155	28.8699	26.1021	27.0757
YBR108W	5.03257	5.62244	23.841	26.0185	8.10939	7.7099
YBR109C	660.075	667.053	1117.87	1211.4	908.505	953.842
YBR110W	89.8407	79.0746	129.832	143.28	111.948	114.434
YBR111C	162.906	163.411	236.103	232.456	179.103	177.388
YBR111W-A	47.5298	49.4487	80.2623	71.7827	69.5633	62.8326
YBR112C	17.6451	15.0653	21.8834	20.4584	21.1604	20.2157
YBR114W	12.4261	9.87532	16.43	16.3953	11.784	13.5986
YBR115C	62.6897	58.3148	89.0017	86.3246	72.9211	70.5425
YBR116C	0	0	0	0	0	0
YBR117C	1.24261	1.6579	8.45971	9.40945	4.8783	4.37097
YBR118W	7755.19	7101.44	5434.21	5584.08	9230.07	8737.99
YBR119W	8.7604	6.48744	12.5847	15.9675	10.2001	12.3237
YBR120C	49.7044	43.8983	76.2772	72.7807	50.0501	50.5697
YBR121C	463.432	411.664	429.068	457.214	410.284	431.026
YBR122C	73.4383	65.0185	123.749	132.231	117.776	125.544
YBR123C	7.08288	6.48744	8.66945	8.62533	8.42616	6.13149
YBR124W	0	0	4.89404	4.70472	0	0
YBR125C	42.4351	41.3033	35.9363	42.4138	54.3582	56.3369
YBR126C	86.0508	82.2463	121.652	122.751	88.1896	88.0871
YBR126W-A	273.312	313.992	177.933	146.631	134.565	149.159
YBR127C	522.953	452.895	316.505	345.512	523.436	453.609
YBR128C	1.73965	1.15332	2.23728	2.99392	3.35779	3.0961
YBR129C	11.9291	13.4074	21.0444	21.8841	19.1331	22.0977
YBR130C	33.4883	25.5172	44.0464	43.9108	43.6513	48.3842
YBR131W	7.76631	7.85701	8.52962	6.70067	5.76527	6.1922
YBR132C	10.3758	6.91993	31.252	31.5074	13.8113	10.9274
YBR133C	40.6955	37.555	48.3112	43.2692	51.0004	50.3875
YBR135W	69.3998	67.6135	142.207	144.349	81.6641	84.9303
YBR136W	12.6125	9.65907	12.2351	13.0449	15.5219	14.4485
YBR137W	74.6809	83.5438	97.0419	101.651	84.1983	91.1832
YBR138C	6.39944	5.91077	26.288	26.9452	14.6349	15.3591
YBR139W	122.335	97.0232	202.404	203.943	168.65	151.223
YBR140C	26.4676	32.8697	45.5146	73.2084	51.4439	35.6962
YBR141C	12.9853	11.6774	12.6546	13.4013	11.7206	12.9915
YBR141W-A	7.64205	6.05494	68.5166	64.3692	18.943	19.4872
YBR142W	30.7546	27.1031	32.9299	34.43	31.4872	36.6676
YBR143C	180.551	151.806	151.576	145.134	180.687	172.896
YBR145W	16.7131	16.7232	65.5802	74.8479	29.65	29.4433
YBR146W	101.894	88.5175	101.656	108.351	122.845	134.468
YBR147W	0	0	20.1355	19.8169	3.73792	4.43167
YBR149W	83.8762	87.3641	211.632	213.709	145.335	150.252
YBR150C	5.34322	4.82954	14.9618	16.7517	5.82862	8.55981
YBR151W	88.2253	77.633	65.9997	66.6503	59.1098	67.8107
YBR152W	1.429	1.94623	4.54447	5.06114	2.28077	2.61044
YBR153W	14.4143	18.8136	45.3049	45.1939	30.1568	30.9003
YBR154C	198.01	191.451	173.808	160.103	149.263	155.959
YBR155W	41.9381	41.4475	28.8049	24.6642	29.9667	30.0504
YBR156C	3.85209	2.59497	12.2351	10.7638	5.4485	5.58512
YBR157C	38.5209	37.555	42.2286	42.7702	30.0301	28.5327
YBR158W	74.9294	85.0575	72.6416	96.9458	94.0182	74.9135
YBR159W	196.022	180.279	147.66	148.341	200.834	199.061
YBR160W	40.1984	31.7164	53.7646	49.6135	45.1718	45.1667
YBR161W	16.8374	19.174	39.2223	40.5604	20.4635	20.155
YBR162C	486.73	387.228	221.001	213.423	300.554	237.307
YBR162W-A	499.902	442.948	535.618	487.01	314.175	372.261
YBR163W	24.7901	23.9314	36.0761	37.2814	40.6103	44.681
YBR164C	181.98	184.532	237.781	236.234	184.299	203.311
YBR165W	22.5534	20.4715	47.3324	46.4057	32.881	33.7536
YBR166C	59.7074	49.8812	99.419	99.5833	70.1335	69.0856
YBR167C	39.2665	43.5379	99.9084	93.7381	67.4726	73.8208
YBR168W	15.0356	15.4978	31.6015	32.3628	25.1518	26.3472
YBR169C	3.41718	7.35243	8.11013	9.26688	2.97767	2.97469
YBR170C	32.4943	28.0401	56.8408	57.4547	55.3086	57.3082
YBR171W	68.9649	73.7405	60.1268	59.3793	61.3906	63.1969
YBR172C	19.6332	19.3902	45.8642	39.7763	24.4549	22.0977
YBR173C	140.291	121.459	198.209	180.134	168.27	182.124
YBR175W	23.3611	22.6339	57.6099	58.4526	46.2489	45.2881
YBR176W	7.95271	10.3799	13.2838	14.8983	10.7069	13.1736
YBR177C	67.598	61.7027	75.0886	79.909	76.5323	74.3671
YBR178W	0	0	1.04872	1.28311	0	0
YBR179C	14.1658	11.9657	20.9745	20.0307	19.7033	19.1837
YBR181C	4585.92	4248.91	3127.22	3280.05	4997.16	5089.81
YBR182C	4.03848	4.9737	9.64826	10.8351	8.2361	7.7099
YBR182C-A	6.15092	7.78492	3.07626	3.35033	1.26709	1.39628
YBR183W	52.8731	51.6112	106.76	113.127	57.6527	58.2796
YBR184W	0	0	3.35592	3.20777	1.90064	1.63911
YBR185C	28.083	25.0127	33.699	33.3608	44.9818	40.4921
YBR187W	159.427	216.536	197.859	189.044	222.818	224.012
YBR188C	31.0653	26.0218	75.0187	71.9965	36.6823	47.1093
YBR189W	2321.07	2015.57	1511.56	1458.68	2157.54	2146.33
YBR191W	2520.57	2750.82	2004.67	1898.71	3033.35	3100.53
YBR191W-A	2.79587	3.24372	0	0	6.96901	6.13149
YBR192W	15.9054	17.2277	14.752	14.5419	22.9344	18.8801
YBR193C	31.9351	32.2209	76.6967	88.5344	69.7534	73.7601
YBR194W	10.8728	11.4611	40.2011	43.3405	24.4549	26.0437
YBR195C	14.9113	13.9119	19.8558	22.7395	16.2821	16.4518
YBR196C	1526.92	1377.93	1409.28	1554.91	1291.1	1285.43
YBR196C-A	2.11244	1.44165	0	0	0	0
YBR196C-B	4.84618	5.11787	0	0	0	0
YBR197C	30.8789	27.6076	79.1437	79.1962	79.5734	82.4413
YBR198C	32.37	30.2026	79.3534	78.9823	36.9357	37.7603
YBR199W	84.6218	72.0826	93.1966	99.5833	90.0269	80.1344
YBR200W	23.7339	21.9131	32.6503	32.7192	24.0747	24.526
YBR201C-A	3.85209	5.33411	8.04022	8.26891	2.0907	1.94265
YBR201W	14.5385	13.7678	12.305	12.1182	18.8163	19.123
YBR202W	21.435	18.9577	25.5889	24.1652	32.4376	31.386
YBR203W	2.79587	3.53205	9.92792	10.8351	12.3541	11.1095
YBR204C	10.3758	11.1007	16.6398	14.6844	10.5169	11.4131
YBR205W	136.874	129.028	98.0207	100.724	103.521	107.939
YBR207W	46.5358	46.277	87.114	89.0333	49.7334	45.4702
YBR208C	36.7191	33.8788	143.046	126.315	69.1199	69.9962
YBR210W	77.1661	77.9934	138.012	131.804	89.33	84.8696
YBR211C	19.6954	19.2461	31.0422	29.2263	24.2015	25.2545
YBR212W	11.8669	11.9657	37.8939	38.4219	15.015	15.7233
YBR213W	6.08879	5.83869	4.26481	3.63547	7.28578	9.89538
YBR214W	47.2813	32.7976	65.5103	66.8641	43.0178	38.853
YBR215W	9.19532	9.9474	19.9258	23.7375	16.1554	19.3658
YBR216C	4.28701	4.03663	10.697	11.6192	12.1641	10.2596
YBR217W	11.1835	10.5241	53.1353	49.9699	40.6736	38.6102
YBR218C	41.0061	47.2862	40.5507	36.6398	45.0451	44.9238
YBR220C	13.9794	14.9211	17.8982	18.1061	13.4945	14.6306
YBR221C	580.672	657.249	901.553	943.297	747.077	769.533
YBR222C	56.2281	59.1077	80.8216	78.7685	59.4266	49.4162
YBR223C	5.0947	3.17164	15.7309	19.7456	10.01	9.34901
YBR225W	6.08879	6.70368	19.5762	19.1753	8.48952	9.10618
YBR227C	9.75449	9.80324	14.6821	13.4726	12.7976	13.8414
YBR228W	5.84027	5.91077	25.7287	23.88	15.2685	15.2984
YBR229C	79.2785	63.5048	83.6882	85.3979	92.0542	89.9083
YBR230C	166.013	161.393	282.666	314.005	184.362	179.695
YBR230W-A	14.1036	15.3536	44.4659	39.3486	15.6486	15.2984
YBR231C	6.39944	4.82954	14.6821	15.6111	13.1778	13.1736
YBR233W	3.35505	2.66706	5.1737	6.5581	3.67457	4.85663
YBR233W-A	65.4234	58.5311	78.3047	76.8438	48.1495	51.116
YBR234C	121.838	95.2932	143.395	156.04	123.415	119.777
YBR235W	48.3997	47.9349	68.9361	69.858	76.1522	64.6539
YBR236C	15.6569	9.22658	20.9745	21.3138	18.2461	18.0302
YBR237W	8.82253	7.28034	25.2393	28.1571	19.5766	26.2258
YBR238C	108.728	92.2658	78.025	92.0273	115.432	110.488
YBR239C	6.7101	5.98286	13.4237	17.4645	11.4038	12.0202
YBR240C	1.92605	2.73914	2.16736	2.70878	3.29444	3.27822
YBR241C	16.4646	14.5607	33.9087	35.7131	21.7306	19.4872
YBR242W	48.3997	50.9624	69.3556	63.4425	48.2128	49.8412
YBR243C	18.8255	16.579	12.6546	12.4746	12.6076	12.8701
YBR244W	37.4026	36.5459	56.5612	53.4628	35.7953	35.8176
YBR246W	23.1126	22.5619	42.3684	44.3385	62.2776	63.379
YBR247C	37.4026	32.2209	45.7244	46.0493	34.845	39.7637
YBR248C	40.3227	39.0688	53.415	54.3895	64.2416	58.2796
YBR249C	299.034	263.318	412.288	449.515	438.034	408.2
YBR250W	0	0	6.29234	6.1304	0	0
YBR251W	25.225	24.0756	40.6905	48.4729	38.773	40.0672
YBR252W	252.809	361.35	377.61	365.115	324.502	368.922
YBR253W	46.163	51.2507	100.608	84.8276	74.6317	81.1664
YBR254C	29.0771	46.4933	58.8684	58.6665	52.2675	65.0181
YBR255C-A	66.7282	68.6227	149.828	141.997	95.3487	95.797
YBR255W	10.935	11.6053	27.1969	26.874	14.8883	17.7874
YBR256C	104.069	100.411	279.03	304.239	142.168	160.147
YBR257W	17.8315	16.2907	24.1906	23.4523	23.5679	21.6727
YBR258C	22.9262	21.3365	46.004	36.0696	25.8487	28.472
YBR259W	5.71601	5.98286	8.11013	9.40945	11.0237	11.8987
YBR260C	23.6717	21.0481	30.9024	30.8658	32.8177	32.2359
YBR261C	35.6008	32.293	44.7455	48.5442	50.0501	55.9119
YBR262C	95.9916	86.7875	229.321	212.711	98.5797	103.264
YBR263W	127.43	110.142	30.9723	29.5827	101.304	105.389
YBR264C	35.8493	33.9509	77.8153	68.8601	48.2762	53.8479
YBR265W	42.0624	38.42	66.559	64.8682	42.7644	47.17
YBR267W	23.796	22.4898	24.4003	30.153	26.1021	26.5293
YBR268W	109.225	101.204	112.283	99.8685	90.0902	105.45
YBR269C	70.8288	69.9922	136.194	125.103	85.5287	84.7482
YBR270C	0	0	16.0105	17.0368	6.2721	6.43503
YBR271W	20.3167	15.1373	17.3389	20.3159	24.7083	25.0723
YBR272C	40.5091	31.8605	79.9827	97.1597	59.8067	57.7332
YBR273C	31.3138	26.5985	29.2944	31.5074	41.624	41.6456
YBR274W	16.2782	15.3536	25.0995	21.8128	20.7803	19.0623
YBR275C	11.8669	11.8215	19.1567	18.1773	17.0424	17.4232
YBR276C	30.1333	24.2198	26.3579	27.9432	31.1705	32.2359
YBR277C	1.73965	1.15332	0	0	0	0
YBR278W	10.8728	12.4703	31.5316	40.703	23.4412	29.3826
YBR279W	29.8848	29.1214	37.6841	40.9881	32.2475	33.7536
YBR280C	2.42309	3.02747	5.38345	4.84729	3.04102	4.18884
YBR281C	44.6718	39.8617	60.6162	62.6584	47.3259	45.713
YBR282W	37.3404	35.5367	54.1141	51.0391	39.7233	39.5815
YBR283C	107.672	112.737	76.2772	82.5465	86.3523	82.7448
YBR284W	2.36096	3.17164	20.2054	19.8169	7.85597	7.58848
YBR285W	0	0	0	0	0	0
YBR286W	75.6128	66.7485	25.2393	26.2324	50.8737	45.4702
YBR287W	299.966	307	220.791	227.466	338.123	342.271
YBR288C	32.37	34.3834	38.8028	38.8496	42.3209	42.9205
YBR289W	3.54144	2.8833	5.03387	4.84729	5.51185	6.31362
YBR290W	55.0476	43.7541	88.722	80.6931	58.7297	59.7365
YBR291C	40.2606	44.5471	207.158	204.798	53.7881	61.7399
YBR292C	20.006	19.6065	50.2688	58.8803	40.6103	34.5428
YBR293W	5.46749	4.5412	31.5316	31.4361	14.4448	12.9308
YBR295W	10.3137	10.6682	22.4427	21.0287	20.0201	22.644
YBR296C	3.16866	4.46912	0	0	1.83728	1.5177
YBR296C-A	0	0	7.20124	5.7027	0	0
YBR297W	15.0356	12.9028	96.133	98.4428	29.84	30.4753
YBR298C	5.65388	4.5412	86.6246	99.9397	26.6089	26.0437
YBR299W	0	0	2.65677	2.56621	0	0
YBR300C	0	0	2.37711	1.78209	0	0
YCL001W	271.2	288.114	617.978	591.013	240.431	256.976
YCL002C	65.7962	69.8481	215.128	191.468	85.3386	98.286
YCL004W	9.31958	7.85701	37.7541	37.9229	14.5082	15.3591
YCL005W	41.2547	45.9887	243.723	257.263	63.9248	58.6438
YCL005W-A	731.525	645.5	777.034	669.14	369.674	377.664
YCL007C	10.7486	7.13618	7.13132	5.84526	2.97767	2.48902
YCL008C	55.6689	57.1615	241.976	256.835	94.2716	86.6301
YCL009C	850.194	745.767	1157.93	1168.34	868.655	730.012
YCL010C	17.0859	16.6511	107.459	121.04	40.9271	38.5495
YCL011C	72.8791	62.6398	134.307	132.73	58.9831	55.3656
YCL012C	51.6305	55.2874	283.016	264.676	75.582	78.0703
YCL014W	14.7871	13.9119	39.6418	36.3547	18.5629	19.3658
YCL016C	5.03257	4.82954	38.5231	44.5523	15.1417	12.6272
YCL017C	110.033	104.52	252.812	273.444	163.962	159.176
YCL018W	49.8287	57.9544	199.467	190.399	39.4699	37.2746
YCL019W	34.8552	33.4463	43.3472	49.6135	15.2051	16.1483
YCL020W	0	0	3.286	2.92263	0	0
YCL021W-A	0	0	0	0	0	0
YCL024W	11.9912	11.9657	63.9022	64.7256	16.0287	19.3051
YCL025C	80.2105	68.8389	237.92	222.619	67.9795	66.2323
YCL026C-A	2.79587	3.45997	6.15251	8.62533	1.01367	1.33557
YCL026C-B	8.20123	10.3799	10.6271	8.48276	6.8423	8.4991
YCL027W	3.41718	2.8833	9.15885	10.3361	0	0
YCL028W	68.7164	72.443	112.144	112.129	82.8678	82.1985
YCL029C	14.8492	13.4074	42.3684	42.8415	26.0387	33.5714
YCL030C	22.6776	21.3365	74.5992	70.2144	65.3819	59.008
YCL031C	164.087	136.524	374.674	380.441	179.167	197.483
YCL032W	25.9084	23.2106	90.6796	100.296	29.9034	32.2359
YCL033C	64.1808	77.4888	181.289	153.973	82.2343	87.1158
YCL034W	30.5682	26.9589	98.7898	102.577	37.886	38.0031
YCL035C	278.842	279.681	1264.41	1320.53	374.616	430.479
YCL036W	21.3108	20.976	42.7879	38.6358	19.8933	20.7621
YCL037C	143.149	121.748	372.507	428.558	253.799	262.501
YCL038C	13.4823	16.4348	53.9044	56.3141	21.0337	17.8481
YCL039W	22.6155	19.9669	95.5038	99.7259	20.5269	21.9762
YCL040W	90.2756	72.0826	339.367	352.783	112.644	92.4581
YCL042W	5.34322	4.82954	20.7647	21.1713	9.31313	9.04547
YCL043C	1173.58	1088.45	1524.42	1526.47	941.386	948.439
YCL044C	46.2872	44.1146	129.552	141.356	55.562	52.2088
YCL045C	68.095	62.2794	98.3703	92.5975	52.711	51.541
YCL047C	31.0653	33.158	72.1522	75.133	30.9804	33.2679
YCL048W-A	0	0	73.6204	76.9151	6.08204	6.79928
YCL049C	47.4056	39.285	250.156	260.756	59.7434	63.0148
YCL050C	252.126	195.128	504.436	589.944	245.309	271.607
YCL051W	24.293	22.9944	76.6967	75.2756	36.3655	35.8176
YCL052C	35.1659	31.7884	86.8343	90.459	40.6736	41.8277
YCL054W	56.663	47.8629	78.6543	82.6891	48.9731	53.4229
YCL054W-A	138.365	165.646	0	0	137.606	171.075
YCL055W	14.8492	11.9657	34.7477	35.428	13.3045	14.752
YCL056C	27.0268	23.4989	199.537	199.808	55.8788	59.7972
YCL057C-A	210.933	227.781	465.494	441.246	169.537	163.001
YCL057W	90.7106	81.8859	190.099	212.568	115.305	110.792
YCL058W-A	61.1364	53.7736	130.601	122.608	63.7347	68.9641
YCL059C	53.7429	49.9533	98.1605	92.455	42.7644	49.2341
YCL061C	6.08879	7.71284	30.9723	28.4422	8.933	8.55981
YCL063W	26.4055	26.5264	42.5782	42.8415	28.5729	22.0977
YCL064C	43.305	40.15	13.0042	12.6172	140.711	138.96
YCR002C	38.7694	39.7175	117.177	118.402	63.0378	62.1649
YCR003W	78.4087	75.5426	241.276	229.676	99.5934	110.731
YCR004C	93.8171	96.807	250.365	246.356	112.201	116.438
YCR005C	46.0387	49.5928	134.726	135.795	21.7306	18.5766
YCR006C	5.15683	4.03663	55.1629	61.1614	11.2138	10.5025
YCR007C	3.0444	3.67621	55.4425	59.5932	8.42616	8.25627
YCR008W	78.7194	90.1754	159.826	163.454	111.441	124.39
YCR009C	123.64	103.943	313.848	325.339	152.875	149.22
YCR011C	27.3996	25.0127	56.4913	64.084	22.7443	21.612
YCR012W	17978.5	19347.8	27840.1	26773.9	14885.9	13765.3
YCR014C	0	0	5.80294	5.56013	0	0
YCR015C	73.0655	80.5884	146.332	140.928	61.2005	58.1581
YCR016W	42.9943	33.7347	66.9086	67.2205	37.886	38.5495
YCR017C	171.48	151.518	401.102	399.474	139.127	116.863
YCR018C-A	2.2367	3.24372	25.3791	23.0959	5.4485	4.00672
YCR019W	17.9557	18.0207	73.97	76.4874	22.5542	27.6221
YCR020C	0	0	2.44702	2.35236	0	0
YCR020C-A	56.4145	58.1707	224.776	222.904	96.8692	92.2152
YCR020W-B	72.5684	72.5151	466.892	476.888	232.891	253.03
YCR021C	27.3374	43.5379	15.6609	14.4706	3.10438	3.70318
YCR022C	0	0	1.32838	1.06926	0	0
YCR023C	53.805	52.332	261.062	275.226	92.6244	95.0078
YCR024C	9.50597	11.9657	34.6778	42.5564	16.6623	15.5412
YCR024C-A	226.155	288.619	431.515	372.457	284.779	294.251
YCR024C-B	0	0	2.7966	2.06723	4.05469	4.37097
YCR025C	0	0	2.09745	4.20574	0	0
YCR026C	17.2723	16.5069	42.2985	39.4199	16.3455	16.5732
YCR027C	26.7783	30.563	97.5313	103.575	51.3172	45.5916
YCR028C	46.2872	44.1866	128.923	132.017	111.061	97.9218
YCR028C-A	437.958	460.968	1019.29	1073.6	493.025	514.135
YCR030C	72.6306	66.5323	255.539	260.257	80.5237	74.4278
YCR031C	3027.87	3689.26	5598.65	5119.45	2720.64	2633.81
YCR032W	10.1273	8.86616	45.4447	51.1104	17.4225	18.0909
YCR033W	28.0209	22.5619	67.5378	75.8459	25.3418	29.7469
YCR034W	327.366	253.226	361.95	379.015	166.496	169.132
YCR035C	65.3613	62.7119	161.084	173.077	67.9795	73.8815
YCR036W	31.6244	29.9864	163.881	152.262	68.1062	67.2036
YCR037C	22.9262	19.8948	82.0801	93.1678	53.598	50.9946
YCR042C	20.8759	18.8856	82.4297	95.5202	37.1258	35.8783
YCR043C	437.337	400.779	949.445	1002.61	572.029	566.465
YCR044C	237.401	208.679	452.21	527.784	308.727	291.398
YCR045W-A	0	0	51.1078	57.1695	17.8026	14.8127
YCR046C	114.755	117.999	336.501	318.282	239.037	224.255
YCR047C	53.4322	47.8629	106.69	98.5854	41.1171	36.0605
YCR047W-A	0	0	2.58685	4.70472	0	0
YCR048W	44.9204	39.5734	99.2093	108.066	55.2452	47.5343
YCR050C	0	0	4.89404	4.41959	0	0
YCR051W	110.53	110.07	389.077	406.388	150.467	156.201
YCR052W	27.0268	24.2918	45.3049	47.1185	27.1791	28.5327
YCR053W	283.439	254.956	646.993	746.269	295.359	315.802
YCR054C	27.8966	23.1385	77.4657	94.8786	32.881	31.8109
YCR057C	87.4798	79.0746	147.94	136.009	96.3623	87.8443
YCR059C	96.613	87.7245	239.529	244.717	115.432	95.8577
YCR060W	114.258	115.909	276.653	249.992	73.5547	88.7549
YCR061W	39.515	37.4109	60.2667	81.0496	28.5096	18.7587
YCR063W	8.38762	8.43367	65.5802	63.2286	24.6449	27.8042
YCR064C	4.72192	7.35243	3.49575	2.99392	0	0
YCR065W	9.07106	7.49659	29.8537	44.6236	15.5219	12.2023
YCR066W	6.02666	4.75745	31.5316	34.5726	8.42616	7.64919
YCR067C	51.4441	50.4578	132.419	133.301	69.2466	63.6218
YCR068W	26.7783	27.031	149.898	155.541	83.2479	69.7533
YCR069W	83.9383	73.6684	140.739	152.191	91.0406	86.7515
YCR071C	34.5446	32.7976	109.836	102.577	32.0574	39.3994
YCR072C	13.2959	12.8307	28.2456	25.7334	19.7033	17.4232
YCR073C	8.20123	6.34327	50.6883	55.1023	15.3952	15.6019
YCR073W-A	57.0979	51.6832	192.686	200.949	100.734	89.7869
YCR075C	32.0593	34.9601	248.408	261.397	96.4257	90.394
YCR075W-A	66.7903	54.3503	195.762	189.187	42.0675	43.1633
YCR076C	20.1303	16.1465	120.743	121.753	35.5419	37.9424
YCR077C	70.5803	64.7302	199.887	191.325	86.2256	81.47
YCR079W	19.8818	16.5069	76.7666	73.7786	24.6449	24.7688
YCR081C-A	1.61539	1.36957	0	0	0	0
YCR081W	17.8936	16.6511	66.1395	65.7949	29.9034	27.0757
YCR082W	128.983	112.665	354.958	359.626	220.601	220.795
YCR083W	39.7635	36.5459	72.292	62.9435	47.7694	45.4702
YCR084C	92.823	81.5254	176.256	167.944	90.6604	85.2338
YCR085W	0	0	2.65677	2.6375	0	0
YCR086W	8.38762	7.28034	49.2201	48.8293	10.5169	12.5665
YCR087C-A	119.539	95.077	228.901	232.527	123.985	131.675
YCR087W	0	0	2.30719	1.92466	0	0
YCR088W	20.4409	18.8136	98.9296	111.06	37.1258	42.5562
YCR089W	7.39353	8.79408	117.107	130.592	15.6486	14.2056
YCR090C	91.2697	102.718	274.905	267.955	130.384	145.456
YCR091W	1.86392	1.72998	26.2181	25.7334	5.38514	6.9207
YCR092C	12.0533	9.73115	32.021	31.7212	15.3318	15.177
YCR093W	137.122	123.117	270.081	285.634	124.809	120.748
YCR094W	58.6512	52.9807	133.118	165.948	69.0565	68.1142
YCR095C	31.5002	24.6523	82.8492	92.2411	36.7457	38.7316
YCR095W-A	3.16866	3.17164	62.1544	59.807	8.2361	8.4991
YCR096C	1.429	1.29749	0	0	2.02735	2.12478
YCR097W	49.021	53.4132	0	0	48.0228	46.6843
YCR097W-A	0	0	0	0	0	0
YCR098C	34.2339	32.3651	49.3599	52.0371	36.1121	35.2106
YCR101C	14.1036	12.3261	98.8597	100.866	36.1121	34.1785
YCR102C	2.05031	1.87415	4.33472	3.0652	0	0
YCR102W-A	0	0	3.56566	5.20371	0	0
YCR106W	21.1865	16.2907	111.235	118.972	26.5456	23.069
YCR107W	0	0	2.30719	2.56621	0	0
YDL001W	11.4941	9.87532	17.6885	22.4544	7.34913	6.61716
YDL002C	39.8257	30.4909	59.148	69.1452	54.1048	59.008
YDL003W	18.2042	17.3719	33.8388	39.1347	28.1928	27.0757
YDL004W	735.812	726.521	878.131	948.073	758.291	785.499
YDL005C	21.7457	23.0664	45.5845	46.1918	35.0984	42.3134
YDL006W	31.7487	29.626	35.1672	34.5013	37.7593	40.4921
YDL007W	107.61	99.7623	121.163	109.42	111.884	107.635
YDL008W	82.1365	91.3287	153.673	156.61	109.033	119.412
YDL009C	6.64797	7.56867	27.8261	25.876	12.4809	12.6272
YDL010W	42.0624	41.3754	72.9912	70.9273	45.6787	50.6304
YDL012C	71.5744	62.856	112.493	113.27	74.8851	75.2778
YDL013W	19.1362	15.3536	31.3219	31.2935	26.2922	24.0403
YDL014W	200.371	176.026	225.406	244.931	173.972	148.066
YDL015C	272.504	262.813	270.291	257.904	308.537	283.02
YDL017W	12.0533	11.1007	21.394	21.7415	13.8113	13.72
YDL018C	48.8967	51.8274	95.9233	91.7421	71.0205	78.3131
YDL019C	28.8907	27.2472	23.7711	28.7986	30.9804	29.9897
YDL020C	39.7635	38.2038	151.016	173.077	97.9462	95.4328
YDL021W	0	0	7.06141	8.34019	0	0
YDL022W	37.589	36.8342	158.217	173.006	76.5323	75.1563
YDL024C	0	0	1.60804	2.78006	0	0
YDL025C	3.85209	3.67621	25.449	27.1591	22.2375	19.6693
YDL025W-A	0	0	1.67796	1.63953	0	0
YDL026W	0	0	5.31353	4.70472	1.52051	2.00336
YDL027C	13.5445	12.0378	23.9109	26.6601	24.2015	27.8042
YDL028C	5.77814	4.25287	12.305	12.1895	7.28578	8.92406
YDL029W	64.5536	66.7485	117.038	119.186	72.4777	78.9202
YDL030W	11.432	9.80324	10.7669	12.9736	10.7069	12.6879
YDL031W	12.1155	7.71284	9.50843	10.6926	8.80629	9.83467
YDL033C	20.3788	20.1111	21.6736	19.6743	23.8847	21.0656
YDL035C	7.70418	8.07325	6.22243	7.62736	4.30811	3.52106
YDL036C	24.8522	18.6694	20.4851	19.104	22.0474	23.7975
YDL037C	38.3345	39.5734	1.67796	1.99594	5.06837	6.43503
YDL040C	110.157	96.7349	103.544	108.137	133.235	132.95
YDL042C	12.364	9.65907	11.1165	11.4054	16.0287	12.6879
YDL043C	32.0593	27.8239	59.0082	60.4486	45.8054	43.7097
YDL044C	5.0947	4.9737	15.9406	17.6784	10.2001	12.3844
YDL045C	28.7664	28.4726	32.9299	30.8658	31.2972	27.1364
YDL045W-A	174.649	164.42	289.028	265.746	170.804	197.543
YDL046W	746.622	731.999	991.394	981.648	573.803	599.187
YDL047W	57.9678	48.1512	106.55	115.979	70.6404	64.5932
YDL048C	147.187	123.189	51.8769	71.1411	88.6331	94.6436
YDL049C	1.98818	1.80207	7.41098	7.48479	2.21741	2.12478
YDL051W	177.072	154.545	145.423	140.999	197.286	190.137
YDL052C	251.815	222.087	296.579	314.005	271.094	275.796
YDL053C	33.6747	43.2496	53.2752	77.3428	59.8701	57.6118
YDL054C	29.8226	17.3719	38.1735	39.9902	22.871	21.9155
YDL055C	1068.27	955.311	804.511	852.197	1245.8	1346.32
YDL056W	8.82253	9.65907	18.3177	17.0368	10.3902	10.7453
YDL057W	4.90831	2.8833	4.75421	6.20168	3.80128	4.18884
YDL058W	26.0948	22.3456	21.0444	23.5949	33.5146	33.9357
YDL059C	8.38762	6.19911	9.15885	11.8331	6.8423	7.58848
YDL060W	40.1984	36.8342	35.6566	35.7844	33.5146	30.4753
YDL061C	3865.51	3392.21	2546.44	2515.89	2301.93	2156.53
YDL063C	45.231	44.3308	41.5295	44.8374	51.3172	50.3875
YDL064W	81.391	101.997	85.0865	67.7195	84.9585	90.2119
YDL065C	20.8137	17.2998	30.9024	32.7905	22.0474	24.9509
YDL066W	420.375	395.95	199.467	222.904	489.858	493.434
YDL067C	265.359	297.629	341.954	270.949	229.407	205.739
YDL069C	26.7161	23.571	34.4681	36.1408	45.2985	43.4061
YDL070W	92.3881	84.9854	48.1015	47.5462	68.9932	83.4733
YDL072C	207.516	285.303	608.26	584.099	285.919	321.327
YDL073W	22.3049	22.5619	32.6503	35.7844	38.8997	31.9323
YDL074C	67.0388	59.2519	86.4148	96.3756	100.29	111.095
YDL075W	3685.33	3930.16	2089.41	1620.42	2257.07	2461.7
YDL076C	26.1569	21.4806	29.2944	31.2935	39.0264	42.799
YDL077C	11.2456	10.8845	19.7859	22.3118	19.5766	19.3658
YDL078C	107.113	96.1582	105.572	116.406	119.74	121.841
YDL079C	0	0	14.1228	14.328	5.76527	5.22088
YDL080C	13.793	13.047	21.9533	23.7375	19.83	19.8515
YDL081C	4861.59	6520.38	2806.52	2279.65	3726.9	3428.72
YDL082W	1326.18	1334.83	1211.21	1220.52	1762.14	1940.65
YDL083C	6157.07	6932.69	4764.56	4286.93	6212.61	6511.65
YDL084W	276.667	254.884	196.88	205.44	253.418	246.777
YDL085C-A	68.3436	56.2244	50.6184	43.2692	39.4066	43.7097
YDL085W	0	0	0	0	0	0
YDL086C-A	6.33731	8.50575	8.45971	10.8351	2.72425	3.8246
YDL086W	127.243	127.37	243.723	256.764	159.654	165.915
YDL087C	12.1155	12.254	35.5168	35.2141	25.4685	22.3405
YDL088C	16.3403	18.5973	26.1482	32.1489	19.6399	21.4299
YDL089W	23.6096	20.3273	17.4787	16.6091	18.6263	18.1517
YDL090C	20.6273	18.8136	35.0973	35.1429	22.4275	25.0116
YDL091C	21.0001	16.0744	28.1757	28.2283	25.0251	25.7401
YDL092W	113.512	104.664	170.453	178.637	116.192	131.918
YDL093W	12.861	12.6865	6.29234	7.62736	6.52552	5.52442
YDL094C	0	0	5.52328	4.84729	0	0
YDL095W	50.45	42.0962	32.3007	31.7925	39.4066	33.6322
YDL097C	93.1336	86.8596	104.593	103.718	93.8915	93.0652
YDL098C	29.0771	24.0035	27.8961	25.6621	31.9307	37.5782
YDL099W	34.9795	28.4726	53.1353	67.078	49.0998	55.3656
YDL100C	285.863	247.82	330.558	365.685	413.579	404.618
YDL101C	17.5208	15.9303	22.3029	20.3871	22.2375	22.8869
YDL102W	16.8995	15.0653	26.8473	26.5888	21.5406	26.6508
YDL103C	47.8405	43.3937	65.1607	70.2144	62.2776	62.0434
YDL104C	4.78405	3.96454	6.572	7.91249	4.8783	6.1922
YDL105W	2.858	1.94623	8.73936	9.97972	3.23108	3.64247
YDL106C	8.20123	7.64076	25.449	26.3037	18.1828	19.123
YDL107W	7.76631	6.55952	10.697	11.8331	7.5392	10.9274
YDL108W	34.7931	31.5001	59.3578	62.5871	49.7334	47.8985
YDL109C	2.29883	1.58582	18.4575	20.7436	4.11805	4.91734
YDL110C	21.9321	21.4085	67.7476	65.9374	31.4239	32.2359
YDL111C	135.631	127.875	270.291	297.966	231.498	235.182
YDL112W	21.2486	19.5344	16.1503	18.605	20.2735	17.6053
YDL113C	16.5267	12.9028	40.7604	48.1878	36.8724	35.4534
YDL114W-A	2.17457	2.66706	2.65677	2.70878	1.64722	2.54973
YDL115C	25.1629	21.2644	64.5315	61.6604	44.2849	46.6843
YDL116W	30.8789	25.8777	36.0062	33.2895	41.7507	36.7283
YDL117W	28.3315	25.9497	36.9151	39.3486	41.4973	41.0385
YDL119C	11.3078	8.722	27.8261	25.4483	13.8747	13.5379
YDL120W	39.8257	48.1512	66.2793	54.7459	51.1272	54.0907
YDL121C	255.17	240.179	396.837	428.914	299.097	298.258
YDL122W	59.0861	62.2073	58.379	61.0188	60.567	64.4718
YDL123W	86.0508	74.6055	136.754	136.009	145.209	138.171
YDL124W	242.309	222.375	541.421	582.459	291.621	300.018
YDL125C	586.698	643.626	1218.97	1188.16	966.284	935.448
YDL126C	140.291	130.47	98.7898	84.8276	119.867	120.991
YDL127W	14.0415	11.8936	16.0804	15.7537	13.1144	14.8127
YDL128W	178.252	164.781	141.438	153.474	136.086	128.519
YDL129W	10.0651	10.3799	5.59319	5.41756	13.1144	12.3844
YDL130W	3504.91	3228.87	1997.33	1814.31	2151.59	1803.63
YDL130W-A	59.521	51.467	208.836	198.525	91.8642	99.1967
YDL131W	60.5151	56.1524	73.8302	76.5587	70.2602	68.782
YDL132W	20.1303	20.7598	26.7774	29.8679	26.4189	29.929
YDL133C-A	1228.01	1332.09	1164.36	983.929	771.722	808.993
YDL133W	10.8107	10.1636	38.1036	42.9841	29.4599	29.5647
YDL134C	146.379	129.244	153.393	162.456	199.123	199.425
YDL135C	124.261	122.18	127.315	129.522	138.81	135.864
YDL136W	2699.7	2329.57	2053.05	2224.69	2777.47	2833.3
YDL137W	549.669	532.763	714.251	752.328	549.284	568.893
YDL138W	7.76631	5.47828	20.6249	23.3811	14.6983	12.2023
YDL139C	4.53553	4.46912	9.50843	12.3321	6.1454	7.28494
YDL140C	117.986	102.79	105.991	111.702	162.251	133.557
YDL141W	35.725	28.6168	57.4001	68.4323	52.0775	42.6169
YDL142C	19.3847	19.9669	33.6291	31.3648	32.5643	34.4214
YDL143W	144.826	134.218	168.984	180.134	190.381	199.425
YDL144C	61.9441	57.6661	63.273	69.858	58.5396	59.7972
YDL145C	140.353	123.261	101.936	105.429	131.461	114.677
YDL146W	10.5001	11.8215	3.91524	4.49087	5.82862	5.94937
YDL147W	200.619	177.395	296.439	341.092	273.628	287.33
YDL148C	43.7399	36.4017	44.6756	53.5341	42.1308	46.3808
YDL149W	3.78996	2.52289	5.38345	5.20371	5.63856	5.09946
YDL150W	34.9174	34.5997	38.8727	34.0023	30.2201	33.5107
YDL153C	75.0537	70.1364	68.0971	68.3611	65.8254	68.3571
YDL155W	20.7516	17.0115	34.3282	35.0716	32.5009	34.1178
YDL156W	0	0	2.23728	2.92263	2.15406	2.54973
YDL157C	192.045	236.575	199.747	168.301	178.47	190.744
YDL159W	11.3699	10.7403	17.8283	23.1672	15.0784	14.3271
YDL159W-A	0	0	0	0	0	0
YDL160C	81.0803	69.2714	117.527	140.286	103.141	84.6268
YDL160C-A	42.3109	42.2404	36.4956	37.5665	31.9941	31.9323
YDL161W	80.5212	70.713	80.8916	83.9722	97.8828	108.181
YDL164C	15.3462	15.8582	25.7287	26.7314	24.0114	23.7368
YDL165W	32.5564	31.3559	35.7964	36.925	37.1891	43.8311
YDL166C	22.6776	21.769	23.2817	25.3057	22.9344	26.5293
YDL167C	68.53	66.316	72.5018	73.2084	72.9211	78.4346
YDL168W	41.876	40.7988	63.3429	62.5158	57.0825	55.5477
YDL169C	3.29292	2.30664	8.45971	7.69864	5.00501	5.28158
YDL170W	12.6746	9.58699	33.7689	34.0023	26.9257	26.2865
YDL171C	103.137	87.6525	62.434	67.0067	78.0529	67.0822
YDL173W	23.9202	19.3181	31.9511	29.5827	20.2101	20.6407
YDL174C	75.1779	71.0014	108.019	124.247	90.0269	94.0365
YDL175C	10.8107	8.57783	21.4639	21.8841	15.7119	17.1803
YDL176W	8.94679	7.35243	29.1545	30.8658	18.8797	17.241
YDL177C	11.8669	11.8215	31.9511	27.6581	18.6263	24.101
YDL178W	39.4529	31.9326	33.4892	25.7334	50.557	37.3353
YDL179W	21.435	18.0207	41.1799	44.8374	24.835	26.0437
YDL180W	5.84027	6.19911	11.2563	11.6192	10.2634	8.80264
YDL181W	443.426	431.991	299.516	292.62	370.371	395.026
YDL182W	69.5862	66.6043	86.6246	86.5384	49.3532	55.1227
YDL183C	2.29883	2.66706	13.5635	16.3953	5.63856	4.79592
YDL184C	883.931	2367.77	792.136	623.732	717.554	1219.86
YDL185W	113.637	103.366	86.6246	87.0374	101.304	84.3232
YDL187C	7.76631	7.0641	50.1989	49.1145	10.5169	10.5632
YDL188C	99.471	92.9866	103.963	101.223	121.514	114.009
YDL189W	14.4764	13.4074	40.5507	37.7804	9.69325	11.7166
YDL190C	38.1481	33.2301	38.6629	32.7905	42.5109	41.6456
YDL191W	8581.47	7385.51	5072.75	4536.42	5806.96	5768.52
YDL192W	1422.6	1459.1	1342.16	1338.07	1300.99	1411.76
YDL193W	44.6718	40.0059	68.8662	65.3672	55.3719	53.7872
YDL194W	5.0947	3.24372	9.57834	9.69458	8.48952	6.85999
YDL195W	114.072	95.3653	133.118	151.193	137.226	130.218
YDL196W	1.24261	1.00916	4.75421	5.48884	2.21741	1.5784
YDL197C	10.3137	10.8845	78.3047	70.357	19.3232	25.1331
YDL198C	161.415	154.473	210.933	208.148	229.977	215.816
YDL199C	4.34914	3.24372	12.0953	15.1834	3.67457	4.24955
YDL200C	16.7131	16.4348	38.3833	35.3567	21.0337	25.8616
YDL201W	56.4766	52.2599	45.235	45.9067	55.4986	59.7365
YDL202W	38.0239	36.3296	65.1607	62.3732	42.9544	52.998
YDL203C	9.25745	11.1007	21.6037	18.9615	14.1914	10.7453
YDL204W	14.6628	11.7495	71.3831	71.6401	50.9371	53.6658
YDL205C	89.7165	86.2829	67.0484	66.3651	112.898	107.574
YDL206W	7.02075	7.28034	6.85166	8.48276	10.3268	9.34901
YDL207W	21.3729	18.6694	33.6291	33.3608	41.1805	45.5309
YDL208W	583.219	489.801	675.029	735.077	533.636	595.423
YDL209C	9.63023	9.51491	25.5189	24.1652	13.1778	12.2023
YDL210W	0	0	0	0	0	0
YDL211C	5.9024	5.33411	12.0254	16.2527	9.88332	10.5025
YDL212W	702.448	802.352	1008.87	1019.36	762.473	844.264
YDL213C	126.933	97.5999	129.622	135.582	101.684	112.249
YDL215C	5.0947	5.33411	16.0105	19.9594	10.1367	9.2276
YDL216C	4.41127	5.83869	16.43	16.0388	8.17274	9.83467
YDL217C	14.7871	17.444	24.1906	19.5317	21.5406	18.0909
YDL218W	0	0	0	0	0	0
YDL219W	87.6662	89.2383	84.667	84.3286	130.701	131.372
YDL220C	15.8433	15.8582	29.2944	31.0084	23.1244	22.1584
YDL221W	0	0	3.63558	4.34831	0	0
YDL222C	0	0	10.5572	13.2588	7.22242	4.49238
YDL223C	0	0	0	0	0	0
YDL224C	70.3939	68.6227	167.167	195.888	106.436	104.296
YDL225W	22.2427	21.6248	22.163	23.8088	27.6226	30.2932
YDL226C	49.3316	44.9075	57.7497	54.3182	52.2675	51.116
YDL227C	23.4232	19.6065	11.466	11.4054	16.0287	19.1837
YDL229W	2290.75	1848.63	1234.07	1344.62	2032.29	1799.38
YDL230W	16.5888	15.714	35.4469	37.3527	22.9344	21.7941
YDL231C	46.2872	40.0779	172.2	181.061	136.212	128.519
YDL232W	240.197	198.443	227.223	185.694	128.863	118.805
YDL233W	12.2397	12.1099	16.7097	16.9655	8.86964	9.95609
YDL234C	14.9735	15.6419	15.9406	17.8922	12.4175	12.9915
YDL235C	244.297	225.402	249.666	262.966	333.245	343.728
YDL236W	58.3406	64.6581	61.2455	65.1533	69.2466	68.9034
YDL237W	54.9855	49.737	50.4087	49.1145	66.649	52.1481
YDL238C	9.50597	10.1636	15.8707	17.2507	12.3541	14.8734
YDL240W	11.3078	10.0195	14.5423	17.6071	10.3902	11.4131
YDL241W	16.1539	16.0744	23.841	24.5929	11.784	12.3844
YDL243C	6.46157	4.90162	55.9319	59.4506	12.4809	12.8701
YDR001C	48.4618	35.3205	83.6882	96.3756	66.7124	66.4144
YDR002W	396.393	324.228	414.805	440.177	468.127	504.664
YDR003W	55.3583	52.0437	148.849	161.386	76.5323	80.2558
YDR003W-A	0	0	12.6546	13.6152	3.4845	5.03875
YDR004W	13.1717	11.8215	28.3855	28.5848	29.3965	29.929
YDR005C	36.5949	34.9601	53.6247	59.3793	35.732	38.6102
YDR006C	38.3967	34.023	69.6353	73.2796	50.4936	45.0452
YDR007W	12.1776	13.1911	110.955	126.172	38.0761	37.5782
YDR008C	0	0	4.05507	5.06114	0	0
YDR009W	0	0	6.01268	6.34425	2.34412	2.12478
YDR011W	59.5832	45.9166	115.01	151.478	58.9198	52.8766
YDR012W	1139.54	1245.88	1024.18	1043.88	1420.66	1376.19
YDR013W	19.509	29.626	48.9404	49.8986	35.6053	44.1953
YDR014W	10.0651	9.44282	22.2329	25.7334	19.0064	19.3658
YDR014W-A	0	0	0	0	0	0
YDR016C	42.6215	38.348	60.7561	68.6462	42.2575	42.9205
YDR017C	14.7249	11.9657	14.9618	12.9023	15.9654	13.9021
YDR018C	0	0	7.4809	8.69661	4.56153	5.403
YDR019C	12.6125	12.0378	89.4911	89.6036	95.7288	101.686
YDR020C	25.1629	24.6523	33.8388	29.5115	41.1171	39.3994
YDR021W	7.57992	8.00117	9.08894	11.2628	9.50319	9.10618
YDR022C	24.7901	26.3102	57.1904	52.7499	36.3655	39.7637
YDR023W	379.307	358.179	268.473	325.339	327.226	300.625
YDR025W	1958.29	2302.03	1593.01	1318.04	2144.11	2308.84
YDR026C	15.6569	13.4074	33.9087	31.7925	27.3692	30.0504
YDR027C	9.63023	9.22658	10.3474	11.548	13.1144	14.9948
YDR028C	57.1601	51.1066	96.8322	98.6566	88.0629	92.6402
YDR030C	7.08288	7.0641	13.2838	14.5419	9.24977	8.37769
YDR031W	43.7399	40.9429	77.3259	73.2796	66.5223	68.2963
YDR032C	170.983	245.297	382.505	362.691	185.692	208.228
YDR033W	2534.18	1757.88	796.89	1674.24	1530.33	1156.67
YDR034C	24.9765	22.6339	52.576	54.033	37.0624	36.0605
YDR034C-D	16.0918	12.3261	3.56566	4.41959	4.56153	5.03875
YDR034W-B	27.7723	22.9223	48.2413	52.8925	15.7753	16.4518
YDR035W	55.7932	45.9887	57.8896	54.6033	53.0911	55.5477
YDR036C	28.7043	26.5985	30.1333	32.4341	25.9754	26.1651
YDR037W	429.819	318.749	484.231	574.689	535.663	576.664
YDR039C	0	0	3.56566	4.49087	6.65223	5.403
YDR040C	0	0	21.1143	20.4584	2.97767	2.67115
YDR041W	55.9175	55.4315	97.6012	101.009	68.613	79.8308
YDR042C	13.4202	14.6328	5.1737	6.34425	7.15907	6.31362
YDR043C	24.1066	25.5172	40.2011	37.7804	19.4499	21.187
YDR044W	40.0742	36.8342	59.2879	62.0881	56.639	56.944
YDR045C	105.249	121.603	176.955	165.378	134.692	151.588
YDR046C	131.158	109.71	334.892	409.881	168.08	161.422
YDR047W	134.388	136.236	234.774	240.012	158.006	155.959
YDR048C	0	0	2.58685	1.99594	0	0
YDR049W	11.1835	10.0195	14.6821	15.6111	13.3045	15.2984
YDR050C	3855.7	4937.3	4439.25	4262.62	4698.5	4841.94
YDR051C	31.3759	28.5447	35.7964	32.8618	44.9818	46.2594
YDR052C	12.4261	10.5241	17.1991	18.3199	16.9157	17.9088
YDR054C	34.1718	31.7164	40.8303	35.7844	51.9508	52.1481
YDR055W	107.796	102.285	308.045	318.567	111.631	111.278
YDR056C	196.457	172.494	165.069	174.004	188.1	200.518
YDR057W	10.4379	11.317	13.2139	15.8963	15.3318	15.1163
YDR058C	3.72783	2.59497	18.3177	19.8882	4.30811	4.79592
YDR059C	43.9263	54.999	182.828	182.272	61.2639	74.61
YDR060W	86.7963	77.633	98.9995	107.638	119.93	125.18
YDR061W	30.941	28.761	27.6164	30.3669	38.3929	39.5815
YDR062W	210.188	188.568	149.968	155.256	182.905	182.063
YDR063W	85.2431	83.1113	122.491	124.675	127.786	132.586
YDR064W	6568.5	7466.75	5863.34	5638.18	6636.52	7332.9
YDR065W	12.2397	10.6682	16.2203	20.102	17.7393	21.6727
YDR066C	13.4202	12.9749	17.9681	16.9655	12.0374	11.2917
YDR067C	20.1924	18.6694	36.0761	39.1347	31.1705	34.3607
YDR068W	13.2338	12.3261	25.449	26.9452	22.7443	24.5867
YDR069C	11.3078	9.73115	31.1821	28.5848	20.2735	21.9762
YDR070C	5.15683	5.62244	13.7033	12.6885	6.77894	7.77061
YDR071C	205.838	187.126	284.903	309.229	209.007	213.752
YDR072C	52.4382	58.0265	61.8747	56.5993	46.0588	44.5596
YDR073W	53.1837	51.6832	131.16	134.298	91.4207	103.203
YDR074W	47.4056	42.6729	124.658	154.686	92.6244	92.276
YDR075W	21.9942	21.841	17.8283	18.605	15.8386	17.4232
YDR076W	6.5237	6.48744	16.0804	18.0348	11.3405	12.0202
YDR077W	1047.77	1102	6669.25	11622	2956.38	2338.47
YDR078C	10.5622	11.3891	44.2561	38.9922	27.9394	34.2392
YDR079C-A	67.8465	62.4235	107.669	105.571	57.6527	58.401
YDR079W	25.2871	27.6076	29.3643	26.375	19.7666	20.3371
YDR080W	6.15092	6.55952	9.43851	11.3341	11.0871	10.4418
YDR081C	11.7427	10.3078	10.9067	11.4767	14.5716	16.9982
YDR082W	8.82253	7.28034	31.3219	25.0206	22.3008	24.6474
YDR083W	47.7784	35.9692	38.6629	43.4831	40.9271	39.9458
YDR084C	112.829	134.722	195.412	180.205	93.8282	103.143
YDR085C	8.32549	9.44282	37.6841	37.4952	38.3929	38.9744
YDR086C	993.218	880.201	959.233	942.727	749.231	826.538
YDR087C	65.1749	57.5219	58.5188	63.3712	65.8254	61.0114
YDR088C	7.45566	6.34327	12.0254	13.0449	6.90565	8.74193
YDR089W	9.5681	8.21742	19.0169	19.8169	25.8487	24.2831
YDR090C	34.8552	36.0413	65.7899	64.4405	45.8687	47.2307
YDR091C	104.006	90.4637	90.1203	97.7299	144.385	125.969
YDR092W	58.5891	78.2817	89.2114	69.858	76.7858	76.1277
YDR093W	61.0122	57.0894	62.1544	64.4405	79.2566	76.6133
YDR096W	15.0977	15.8582	30.1333	33.3608	26.6089	27.5614
YDR097C	9.75449	10.3799	14.6122	12.6885	15.3952	16.0876
YDR098C	135.32	124.198	145.912	144.848	145.969	154.866
YDR099W	202.235	195.56	191.008	190.185	187.593	197.179
YDR100W	86.9827	110.214	237.92	228.963	136.973	138.9
YDR101C	257.22	210.914	341.255	367.824	244.422	228.322
YDR103W	31.2517	29.1935	51.2476	54.1043	49.2265	51.3589
YDR104C	5.40536	5.33411	10.8368	9.33816	6.90565	9.40972
YDR105C	22.6776	21.6248	22.8622	24.8067	16.979	17.4839
YDR106W	2.17457	2.81122	3.49575	3.99189	2.15406	3.46035
YDR107C	24.1066	18.3811	19.5762	22.7395	36.2388	32.7215
YDR108W	7.3314	7.64076	8.94911	10.2649	14.6983	14.3878
YDR109C	4.41127	3.82038	12.5148	14.328	9.75661	9.71326
YDR110W	35.9114	31.1397	39.3621	39.7763	35.9854	37.9424
YDR111C	4.78405	5.76661	12.4449	17.2507	1.33045	1.39628
YDR113C	13.2338	12.3982	27.127	22.8821	12.0374	12.6879
YDR114C	0	0	1.95762	2.56621	0	0
YDR115W	186.951	198.588	301.124	263.536	243.725	249.995
YDR116C	45.7902	36.1134	59.2879	62.6584	64.4316	59.858
YDR117C	24.0445	20.7598	25.0995	24.3077	31.2338	28.1077
YDR118W	1.98818	2.81122	3.14617	2.92263	3.61121	4.37097
YDR119W	147.933	136.597	113.052	105.215	161.934	150.859
YDR119W-A	11.9912	12.9749	79.0738	68.4323	38.7097	37.4568
YDR120C	51.0092	39.8617	39.9913	47.5462	36.1121	36.5461
YDR121W	12.5504	12.3982	9.858	10.9777	7.98268	10.7453
YDR122W	26.0327	28.5447	60.2667	59.1655	59.1098	51.2374
YDR123C	20.1924	17.5161	47.8917	53.1776	31.3605	32.4787
YDR124W	10.6243	14.0561	66.0696	63.2999	20.6536	23.9796
YDR125C	4.4734	3.82038	15.6609	12.9023	8.10939	7.10282
YDR126W	9.50597	9.58699	31.252	30.0817	11.5939	9.77397
YDR127W	94.4384	82.3904	139.83	169.37	114.165	103.507
YDR128W	13.793	12.4703	21.6037	22.9534	17.9927	20.7621
YDR129C	112.021	100.483	145.493	152.904	172.008	162.758
YDR130C	12.4261	13.2632	44.2561	43.1266	28.3195	28.047
YDR131C	10.0651	10.3799	35.7964	41.0594	26.1021	23.6761
YDR132C	20.7516	19.3181	35.4469	40.7743	23.8847	25.983
YDR133C	1193.59	1123.26	7208.16	7134.86	2753.83	2794.02
YDR135C	223.359	197.723	194.014	196.173	157.119	150.07
YDR137W	15.7812	13.2632	31.8812	39.2773	27.2425	27.3792
YDR138W	18.2042	18.5973	25.9384	26.1611	27.9394	31.5074
YDR139C	101.832	91.4728	83.2687	72.0678	67.9795	72.728
YDR140W	129.294	113.098	255.399	259.972	182.968	189.712
YDR141C	36.16	33.8067	54.9531	61.5891	54.2315	46.0166
YDR142C	23.9202	25.0848	31.0422	39.2773	37.7593	39.1566
YDR143C	29.2013	28.3285	24.5401	28.7273	34.2115	31.5074
YDR144C	68.7785	53.6295	34.1884	34.3587	78.8765	74.3671
YDR145W	40.1363	38.9967	67.3281	67.7195	53.5346	65.5038
YDR146C	13.1095	12.5424	18.108	17.6071	18.3728	18.9409
YDR147W	18.1421	13.047	72.6416	76.5587	33.5779	34.8463
YDR148C	66.8524	61.6306	78.3746	80.907	68.1695	69.207
YDR150W	34.2339	27.5356	34.9575	36.426	42.8277	46.7451
YDR151C	37.8996	35.3205	81.6606	85.2553	49.6066	48.7484
YDR152W	65.4234	56.5128	72.0823	74.7766	84.1349	84.9303
YDR153C	25.4735	20.6156	28.5253	32.8618	25.5319	26.7115
YDR154C	0	0	16.2902	12.9023	16.5989	24.9509
YDR155C	3453.03	3483.9	2244.2	2134.8	1860.91	1810.92
YDR156W	434.603	416.782	763.261	822.899	641.845	580.914
YDR158W	608.817	609.747	762.282	774.711	829.565	833.033
YDR159W	13.9794	12.7586	19.0868	18.7476	25.4685	25.3152
YDR160W	10.7486	9.51491	24.8198	25.6621	18.943	18.9409
YDR161W	57.9678	51.8995	46.004	47.7601	44.7917	42.0706
YDR162C	11.9912	12.182	32.5804	34.5013	17.2324	20.2157
YDR163W	13.1095	9.87532	19.9258	20.0307	16.9157	17.6053
YDR164C	25.0386	21.4085	25.1694	25.5196	24.1381	25.2545
YDR165W	87.0449	72.443	82.6394	83.6871	86.2256	92.883
YDR166C	27.9587	26.3822	35.307	40.8456	42.3842	39.278
YDR167W	96.4887	78.7142	121.512	114.196	100.227	109.76
YDR168W	52.6867	48.6558	49.7095	62.5158	64.1782	63.9861
YDR169C	14.29	15.0653	25.8685	28.7986	19.0064	25.3152
YDR170C	41.6274	38.9967	37.3346	64.583	62.6577	59.7972
YDR171W	15.719	15.8582	43.2773	39.1347	22.1108	27.6221
YDR172W	146.566	128.595	192.056	207.578	244.992	262.197
YDR173C	3.10653	6.05494	5.1737	4.34831	3.42115	4.55309
YDR174W	178.252	170.98	0	0	471.675	518.688
YDR175C	47.7162	48.5837	61.1756	64.8682	52.3309	57.9153
YDR176W	13.4823	11.7495	25.3791	24.379	19.3865	21.4299
YDR177W	112.083	100.483	176.465	176.356	102.001	103.325
YDR178W	167.566	145.391	249.736	250.42	179.61	177.024
YDR179C	20.8137	18.0927	50.4087	54.7459	28.0661	28.2292
YDR179W-A	9.50597	6.99201	9.43851	9.90843	10.897	8.68122
YDR180W	10.3137	10.5241	8.59953	7.98377	16.1554	16.3304
YDR181C	10.2515	7.64076	19.0868	24.878	11.8473	14.3271
YDR182W	55.4204	50.0974	39.0125	40.9881	48.4029	44.4989
YDR183W	25.4735	25.5893	37.5443	38.1368	36.809	35.8783
YDR184C	93.4443	83.9042	112.423	117.903	126.456	132.707
YDR185C	13.2959	11.3891	26.2181	26.6601	20.2735	22.8262
YDR186C	25.722	24.8685	59.4976	63.0861	27.9394	28.4113
YDR188W	183.223	167.592	190.798	191.325	221.868	208.471
YDR189W	24.0445	22.8502	32.7901	33.7885	36.4922	34.4214
YDR190C	190.492	162.763	259.314	280.929	205.459	221.523
YDR191W	2.98226	2.73914	9.01902	8.69661	4.81495	6.1922
YDR192C	5.84027	4.25287	8.66945	8.26891	7.28578	7.34565
YDR194C	55.4826	49.0883	40.6905	44.1246	84.8952	81.8949
YDR195W	5.21896	5.91077	8.04022	8.48276	6.08204	7.34565
YDR196C	64.4293	57.8103	113.682	112.913	105.866	103.871
YDR197W	13.793	14.2724	15.1715	18.2486	19.0697	20.6407
YDR198C	15.222	16.8673	29.1545	27.6581	16.5989	18.3945
YDR200C	12.0533	11.1007	25.5189	27.1591	19.0064	24.526
YDR201W	35.4765	31.3559	43.1375	41.8435	40.1668	46.3808
YDR202C	15.222	15.4978	22.4427	20.5297	19.3865	17.0589
YDR204W	18.7634	17.9486	37.6142	41.3445	36.809	38.7316
YDR205W	43.7399	31.1397	72.3619	84.8276	51.6973	49.5983
YDR206W	29.3877	29.1935	60.1268	67.5057	57.3993	57.9153
YDR207C	7.51779	6.84785	17.8283	17.2507	11.1504	10.9881
YDR208W	40.8819	33.158	63.4827	67.4344	65.9521	66.7787
YDR210W	243.738	279.176	297.488	261.326	349.147	404.861
YDR211W	56.5388	49.4487	55.3726	63.4425	80.6504	73.0923
YDR212W	179.247	158.005	202.264	221.906	262.922	254.245
YDR213W	2.98226	5.26203	8.59953	8.48276	3.73792	5.64583
YDR214W	218.327	185.324	628.395	691.309	295.613	296.558
YDR216W	1.73965	2.37873	72.3619	84.8276	33.8947	30.0504
YDR217C	12.364	10.3078	15.6609	12.8311	12.5442	13.3557
YDR219C	12.861	13.2632	20.9046	19.104	21.4139	20.3371
YDR221W	24.0445	25.5893	24.1206	23.0246	44.3482	42.2527
YDR222W	31.9351	28.6889	35.7964	37.7091	24.2015	24.5867
YDR223W	0	0	6.36226	6.1304	3.80128	3.8853
YDR224C	927.422	1011.17	892.044	760.241	418.204	472.489
YDR225W	2028.44	2458.95	2914.82	3048.3	2030.51	2127.63
YDR226W	683.684	676.856	336.85	312.365	603.896	663.051
YDR227W	5.03257	3.3158	8.59953	11.6905	7.41249	8.31698
YDR228C	36.2221	39.4292	147.52	148.627	56.8291	60.465
YDR229W	6.27518	5.18995	7.27115	8.48276	8.67958	6.79928
YDR231C	23.1747	22.9944	74.5992	75.7033	43.588	44.3774
YDR232W	247.777	242.846	226.175	220.979	228.077	209.199
YDR233C	951.28	856.342	670.065	675.27	603.896	603.679
YDR234W	77.2282	73.8847	108.228	110.205	87.3026	80.62
YDR235W	27.8345	22.4898	37.4744	41.8435	33.6413	33.7536
YDR236C	51.9411	52.1157	122.002	127.527	98.0096	99.1967
YDR237W	32.1215	28.761	34.538	38.0655	45.3619	48.202
YDR238C	76.4205	74.6776	73.3407	71.5688	97.8828	97.9825
YDR239C	10.2515	10.5961	9.57834	8.98175	8.74293	10.0775
YDR240C	6.83436	7.42451	5.94277	6.20168	7.15907	6.85999
YDR242W	2.36096	2.37873	6.50209	6.9858	5.00501	3.94601
YDR243C	15.9054	14.0561	23.4215	23.8088	20.8437	19.2444
YDR244W	5.59175	5.62244	9.43851	8.55404	8.2361	8.86335
YDR245W	132.649	122.396	98.5101	109.278	120.057	118.866
YDR246W	31.0653	26.3102	58.1692	62.6584	40.6736	41.2813
YDR246W-A	0	0	2.37711	2.70878	1.33045	1.5177
YDR247W	38.9558	43.5379	29.2244	41.0594	26.7356	27.015
YDR248C	35.1659	32.8697	30.0634	27.3017	23.948	33.6929
YDR249C	27.8966	32.2209	68.9361	72.7807	69.4366	74.2457
YDR250C	0	0	4.1949	4.63344	0	0
YDR251W	55.6689	61.4865	66.6289	62.0881	58.2229	63.6218
YDR252W	12.2397	10.5961	31.3219	33.8598	21.4772	25.1331
YDR253C	2.79587	2.30664	10.697	12.6172	2.97767	2.73185
YDR254W	11.6184	10.7403	35.3769	38.707	28.3195	25.1331
YDR255C	14.1658	11.2449	35.6566	43.1266	42.3842	43.4061
YDR257C	45.1689	40.3663	78.3047	82.6891	82.1709	83.534
YDR258C	18.577	17.3719	67.4679	70.2857	25.4685	25.8616
YDR259C	4.90831	3.96454	8.31988	8.48276	15.9654	17.241
YDR260C	41.0683	38.8525	105.641	97.3022	85.3386	77.8882
YDR261C	26.5919	22.4898	16.4999	14.827	23.5679	24.526
YDR262W	35.1037	38.348	58.5887	61.803	40.1668	41.767
YDR263C	1.11835	1.2254	5.52328	6.48682	2.91431	3.39964
YDR264C	72.6306	59.324	126.406	147.771	99.2133	95.0078
YDR265W	10.8728	9.15449	23.0719	22.7395	15.5219	13.295
YDR266C	25.3493	22.0573	37.5443	41.4871	33.4512	33.1465
YDR267C	32.0593	27.2472	53.1353	54.6033	44.2849	43.7704
YDR268W	19.8196	16.9394	27.3367	29.654	30.9804	28.4113
YDR270W	18.2042	16.4348	28.8049	35.2854	20.717	21.0049
YDR272W	66.1069	68.8389	108.158	104.145	69.6267	73.4565
YDR275W	39.3286	37.1225	78.5145	79.8377	48.2762	50.5697
YDR276C	1940.9	2119.66	1579.87	1372.07	1154	1205.29
YDR277C	3.41718	4.68537	40.9002	41.1307	14.1281	15.5412
YDR279W	21.2486	20.7598	20.1355	19.9594	21.4772	21.1263
YDR280W	43.6778	40.3663	79.9128	98.8705	54.6117	67.4464
YDR281C	80.0241	77.2005	1.3983	0.997972	13.938	12.4451
YDR282C	17.6451	13.3353	26.2181	28.4422	22.0474	20.8228
YDR283C	7.95271	20.4715	15.3114	50.3976	16.0921	12.8094
YDR284C	70.0211	67.6856	87.8831	111.416	63.9881	57.3082
YDR285W	0	0	1.74787	1.78209	0	0
YDR286C	9.50597	11.9657	40.4807	40.7743	25.912	26.4079
YDR287W	18.3285	17.1557	24.68	20.2446	21.794	19.7908
YDR288W	22.9262	20.4715	35.0274	34.43	32.4376	35.332
YDR289C	21.1865	17.2998	34.9575	34.0023	22.871	25.8008
YDR291W	16.5888	17.1557	35.0274	39.206	33.8947	35.5748
YDR292C	26.8404	22.7781	22.9321	27.8006	33.8947	31.5681
YDR293C	60.7015	61.5586	68.4467	77.8418	60.2502	61.9827
YDR294C	130.536	115.837	119.135	118.83	118.853	116.741
YDR295C	5.28109	5.33411	6.22243	6.20168	6.46217	9.2276
YDR296W	60.0802	50.602	96.2728	96.9458	93.5114	98.711
YDR297W	175.581	166.727	229.88	239.228	172.388	180.363
YDR298C	228.889	287.898	291.405	266.458	355.102	394.237
YDR299W	33.2398	30.4189	38.3833	38.2793	42.3209	41.3421
YDR300C	24.6037	19.9669	28.1058	31.7925	40.2935	42.192
YDR301W	14.5385	13.047	16.0105	16.7517	18.943	16.7554
YDR302W	76.7933	94.4282	121.163	120.755	104.788	124.694
YDR303C	31.5623	30.563	32.2308	34.43	33.0711	35.9998
YDR304C	233.486	228.574	226.804	222.904	225.986	239.068
YDR305C	6.08879	7.42451	11.3262	10.1223	9.37648	10.3203
YDR306C	21.0001	16.5069	41.1799	40.1327	26.6723	27.9256
YDR307W	31.3759	25.3731	36.9151	39.2773	22.8077	22.8869
YDR308C	23.0504	23.3548	33.5592	34.5013	29.0798	28.472
YDR309C	36.0978	27.7518	109.067	121.61	46.2489	48.9912
YDR310C	10.935	11.2449	8.24996	6.9858	13.1778	10.3203
YDR311W	11.3699	9.80324	18.7372	22.2405	23.948	24.0403
YDR312W	28.083	25.2289	28.4554	28.2996	28.0027	30.4753
YDR313C	1.86392	2.30664	5.94277	5.84526	3.35779	5.09946
YDR314C	9.44384	9.01033	19.8558	21.8128	17.1691	19.0016
YDR315C	17.8936	16.7953	32.5104	31.5074	38.3929	41.8277
YDR316W	25.4114	22.4177	37.1248	36.4973	37.696	40.735
YDR316W-A	24.6658	22.1294	13.9131	13.4726	8.10939	9.47043
YDR317W	5.21896	3.96454	3.77541	4.13445	3.16773	4.43167
YDR318W	8.88466	10.0916	28.1757	25.7334	17.4225	19.7908
YDR319C	56.1039	50.7462	165.489	191.824	76.7224	76.1277
YDR320C	15.6569	15.1373	32.0909	32.7192	25.3418	25.7401
YDR320C-A	86.9827	83.2554	107.04	90.5303	47.5159	56.7011
YDR320W-B	7.3314	6.48744	27.8961	29.2263	14.1281	11.4131
YDR321W	125.442	123.261	125.427	120.612	126.392	108.424
YDR322C-A	273.126	254.452	294.482	287.63	267.927	281.684
YDR322W	41.3168	39.4292	62.5039	72.4955	47.8327	48.202
YDR323C	4.03848	2.81122	8.31988	8.69661	8.74293	8.13485
YDR324C	50.6364	49.5928	46.004	45.1226	42.4476	47.17
YDR325W	17.148	14.4886	19.5063	19.8882	27.4325	23.7368
YDR326C	39.2665	44.475	34.0486	41.4871	35.9854	34.8463
YDR328C	129.48	112.809	203.732	191.254	160.097	178.906
YDR329C	20.8759	18.3811	24.0507	26.375	19.6399	21.4906
YDR330W	10.5622	10.6682	12.5847	12.4746	13.938	15.8448
YDR331W	35.725	30.9234	44.6057	45.2651	39.4699	39.7029
YDR332W	4.10061	4.10871	6.85166	6.27297	6.1454	5.16017
YDR333C	22.9262	19.8227	47.0527	57.027	52.521	55.1835
YDR334W	21.8078	20.6156	21.3241	21.8841	24.6449	24.8902
YDR335W	54.8612	56.1524	72.4319	78.0556	75.4553	69.5712
YDR336W	8.20123	7.42451	7.76056	11.3341	14.2548	13.7807
YDR337W	69.027	62.4956	63.5527	60.8763	88.2529	91.1225
YDR338C	15.2841	15.0653	20.9046	25.377	21.2871	20.2157
YDR339C	155.016	151.373	267.914	284.208	184.425	200.761
YDR341C	195.96	169.755	171.501	174.289	227.38	203.796
YDR342C	12.0533	7.35243	40.4108	37.2814	19.4499	17.4232
YDR344C	4.97044	5.26203	10.9766	13.6152	10.9603	9.34901
YDR345C	63.5595	63.649	23.841	20.102	33.8314	29.2005
YDR346C	118.172	109.998	72.6416	71.9253	98.8332	98.6503
YDR347W	86.9827	85.49	81.1013	89.1046	96.0456	100.836
YDR348C	34.3582	33.6626	45.4447	47.1185	33.768	32.7822
YDR349C	89.6543	75.2543	170.872	176.926	119.297	116.559
YDR350C	33.7369	32.1488	85.436	85.4692	60.8838	56.944
YDR351W	21.4972	27.6797	54.4637	75.133	38.8364	36.5461
YDR352W	84.3732	80.5884	103.544	114.268	67.6627	67.5679
YDR353W	227.398	224.609	287.7	283.709	266.153	281.684
YDR354W	81.5774	70.4247	170.103	197.955	148.757	147.034
YDR356W	16.8995	14.4165	16.1503	16.6804	19.5766	19.0016
YDR357C	31.0031	35.8971	87.953	86.2533	35.7953	40.6743
YDR358W	6.89649	6.05494	17.8982	15.7537	10.7069	11.7773
YDR359C	19.1362	18.9577	39.0824	39.2773	21.2871	21.7941
YDR361C	55.4204	46.9979	64.5315	66.2938	65.8254	67.5071
YDR362C	8.07697	7.35243	11.3961	13.2588	14.0647	11.5952
YDR363W	2.60948	2.37873	20.6249	26.6601	19.5766	18.3338
YDR363W-A	214.412	171.268	315.246	290.338	228.9	224.741
YDR364C	23.4853	20.976	47.1926	49.1858	47.5793	44.9238
YDR365C	93.4443	66.6764	56.9807	59.5219	56.4489	51.8445
YDR367W	130.474	174.872	184.086	191.112	142.104	173.2
YDR368W	75.1779	79.5071	65.9997	61.0901	92.8778	93.9151
YDR369C	6.77223	5.18995	13.8432	16.7517	12.2274	12.8094
YDR370C	17.8315	13.8399	40.6206	38.5645	34.7183	30.1718
YDR371W	14.4764	13.7678	32.5804	35.927	23.6946	22.2191
YDR372C	100.651	105.241	124.379	155.541	138.113	141.571
YDR373W	123.391	150.581	280.778	267.1	175.999	195.601
YDR374W-A	19.9439	24.9406	55.9319	43.5543	26.5456	29.9897
YDR375C	33.799	32.3651	47.9616	46.477	52.1408	44.0739
YDR376W	16.7752	15.0653	25.0995	22.8108	17.1691	20.7621
YDR377W	590.488	597.997	752.984	770.007	789.525	799.401
YDR378C	155.14	181.937	174.368	141.569	137.036	141.935
YDR379C-A	14.4764	13.6957	82.0801	76.2736	48.7197	46.8058
YDR379W	5.9024	5.83869	20.0656	19.2466	7.60255	10.0168
YDR380W	5.9024	8.43367	38.4532	34.7864	30.7903	35.6355
YDR381C-A	28.3315	32.7976	82.2199	72.1391	55.4353	63.6218
YDR381W	383.097	331.868	592.669	610.117	357.573	372.686
YDR382W	2979.78	4015.15	1416.2	1108.32	2329.23	2113.61
YDR383C	10.6864	8.86616	21.394	25.0206	16.2188	16.0269
YDR384C	49.2074	47.7187	238.899	246.642	45.9954	48.6877
YDR385W	1201.23	1066.68	797.38	806.005	1089	978.004
YDR386W	2.98226	2.37873	4.89404	4.77601	2.85096	3.8246
YDR387C	11.1835	10.0195	19.2266	23.5236	15.9654	15.5412
YDR388W	80.7697	73.7405	119.555	115.693	100.67	95.1899
YDR389W	40.0742	35.8251	62.0844	67.7195	54.7384	58.5224
YDR390C	24.1066	21.841	30.9723	30.2243	27.3692	31.2646
YDR391C	55.7311	59.1077	249.456	261.469	109.223	124.815
YDR392W	12.364	10.3799	28.2456	28.1571	15.5852	20.8228
YDR393W	21.435	17.5882	23.7012	20.9574	29.9667	29.8683
YDR394W	59.7074	47.8629	63.273	77.3428	72.6677	69.207
YDR395W	67.2252	57.594	49.4298	48.1165	76.6591	66.9608
YDR397C	148.678	129.965	219.253	235.379	166.179	188.923
YDR398W	48.9588	53.1249	84.8068	85.0415	59.3633	66.3537
YDR399W	273.001	255.821	552.258	538.121	791.869	867.03
YDR400W	73.5625	64.4419	71.8725	80.6219	68.1062	67.1429
YDR404C	246.41	235.854	607.77	633.356	332.168	340.085
YDR405W	14.1658	11.6053	33.2096	31.3648	19.0064	18.4552
YDR406W	2.17457	1.94623	2.65677	4.27702	0	0
YDR407C	37.0298	32.4372	48.1015	56.029	55.752	51.0553
YDR408C	75.3643	69.9922	143.605	149.91	204.762	223.466
YDR409W	6.02666	4.18079	9.50843	11.049	6.20875	5.58512
YDR410C	68.6542	99.4019	101.796	91.2431	81.4107	94.0365
YDR411C	33.8611	33.6626	61.8747	62.4445	40.0401	37.3353
YDR412W	95.4325	83.76	69.9848	65.082	75.7087	84.6875
YDR414C	43.7399	38.2759	33.5592	32.8618	47.9594	42.5562
YDR415C	2.05031	2.81122	2.93643	2.70878	2.59754	2.3069
YDR416W	14.6628	12.6865	13.4237	13.6865	17.9294	17.9695
YDR418W	4663.58	4992.51	3678.01	3403.73	4041.01	4358.1
YDR419W	5.03257	6.34327	10.5572	8.62533	11.0871	9.2276
YDR420W	29.9469	30.1305	34.1884	38.7783	30.1568	28.7755
YDR421W	3.91422	4.39704	4.05507	6.20168	10.0734	10.5632
YDR422C	28.7664	25.6614	36.9151	43.2692	61.9608	66.4751
YDR423C	17.2102	14.9211	28.5952	29.2263	21.6039	21.4299
YDR424C	72.1957	91.4008	51.4574	39.4199	41.4339	55.4263
YDR425W	11.8048	11.5332	9.08894	10.3361	11.5939	11.7166
YDR427W	93.32	85.5621	99.2792	97.8725	103.078	102.232
YDR428C	44.6718	57.1615	29.7838	28.4422	32.8177	37.6996
YDR429C	147.436	115.404	152.834	146.773	155.409	162.697
YDR430C	35.5387	32.5093	37.6142	37.8516	42.8911	39.3387
YDR432W	89.2816	52.6924	48.9404	58.6665	74.5684	58.0974
YDR434W	57.4086	53.9899	75.4382	80.1942	50.6203	48.8698
YDR435C	24.2309	22.5619	56.6311	59.4506	65.7621	59.9794
YDR436W	10.1273	10.9566	14.6821	19.104	13.4312	12.6879
YDR437W	21.9321	18.6694	68.5166	79.1962	34.2115	31.0824
YDR438W	1.98818	2.0904	11.1165	13.0449	6.2721	6.37433
YDR439W	15.0356	16.2907	19.4363	28.1571	20.3368	20.7014
YDR440W	21.5593	16.579	22.0232	20.6723	20.907	22.4012
YDR441C	159.738	164.132	149.618	154.828	182.018	188.559
YDR443C	12.364	12.0378	20.4851	21.599	17.7393	18.2731
YDR444W	23.796	21.3365	40.9002	39.206	30.1568	28.8969
YDR445C	9.50597	10.7403	10.8368	8.19763	6.71559	7.22424
YDR446W	0	0	0	0	0	0
YDR447C	1948.85	1994.24	1707.53	1485.48	2105.59	2014.35
YDR448W	13.793	12.182	52.0167	58.3101	17.2324	15.1163
YDR449C	82.82	71.6501	86.7644	87.1087	89.5834	86.3266
YDR450W	1348.42	1616.89	909.733	919.061	1229.65	1443.51
YDR451C	25.7842	21.4806	71.8725	92.455	38.5829	41.7063
YDR452W	68.0329	60.6215	87.114	91.8134	100.164	89.8476
YDR453C	2.67161	2.59497	9.78809	13.1875	5.51185	5.28158
YDR454C	541.033	593.672	408.233	386.286	468.697	494.283
YDR456W	94.252	80.4442	134.307	139.288	147.236	115.284
YDR457W	30.8789	31.7164	32.3007	34.3587	42.2575	39.3994
YDR458C	30.8789	27.2472	49.7095	55.2449	42.0675	47.5343
YDR459C	10.8107	11.1728	37.1248	33.7885	30.727	29.0184
YDR460W	8.82253	9.73115	11.0466	14.9696	12.7976	14.9948
YDR461C-A	7.82845	7.35243	10.5572	9.69458	6.20875	7.16353
YDR461W	251.504	244.36	0	0	96.489	96.222
YDR462W	45.6659	42.2404	143.326	139.074	71.3373	84.0197
YDR463W	39.1422	33.0138	56.0018	62.4445	48.5296	49.4769
YDR464W	0	0	0	0	0	0
YDR465C	59.3346	49.8812	65.5802	70.0006	49.8601	53.605
YDR466W	9.19532	7.28034	22.4427	22.5256	10.0734	11.2917
YDR468C	47.5298	46.9258	55.9319	62.2307	58.2862	56.0334
YDR469W	45.4174	40.4383	104.243	117.19	75.0118	81.1057
YDR470C	22.1806	21.2644	33.3494	35.2141	36.3022	33.5107
YDR471W	2547.1	2360.2	2376.41	2201.38	2715.95	2870.51
YDR472W	79.8377	76.6238	93.4762	102.791	100.987	105.085
YDR473C	8.1391	8.21742	16.7097	16.2527	11.4672	14.8127
YDR475C	11.1835	10.7403	11.2563	9.90843	10.3902	12.0202
YDR476C	70.7667	63.5769	82.2199	78.4121	78.0529	71.2103
YDR477W	48.7725	41.7358	44.0464	42.9841	36.4289	41.0992
YDR478W	21.4972	19.8227	31.6015	36.7824	24.4549	24.2224
YDR479C	9.31958	8.79408	32.5104	33.8598	21.2238	19.123
YDR480W	9.94088	7.92909	27.5465	29.2263	16.8523	16.9982
YDR481C	86.6099	81.7417	43.2773	43.6969	60.0602	59.9187
YDR482C	18.3285	13.6236	19.3664	17.8922	19.1964	20.58
YDR483W	235.599	192.316	147.73	154.686	267.42	279.378
YDR484W	14.4143	12.3982	22.2329	22.6682	19.2598	18.9409
YDR485C	10.5622	7.0641	20.555	24.878	17.4225	18.7587
YDR486C	36.5949	34.9601	52.0167	51.6094	55.752	55.7298
YDR487C	299.469	286.096	319.232	331.113	402.809	406.864
YDR488C	11.9912	10.1636	11.1165	11.049	10.2634	12.3237
YDR489W	29.512	27.1751	60.0569	64.7969	54.3582	55.487
YDR490C	15.9675	16.0023	49.5697	51.3243	29.2698	28.3506
YDR492W	184.341	156.275	124.239	128.453	111.124	94.8864
YDR493W	60.7015	55.2153	101.237	100.439	63.4179	71.2103
YDR494W	63.9323	48.5837	82.4996	93.2391	70.577	74.4886
YDR495C	3.72783	2.8833	4.26481	4.13445	4.11805	4.18884
YDR496C	42.3109	29.698	42.2286	48.9006	36.6823	37.1532
YDR497C	482.071	450.156	1298.81	1446.27	1010.57	961.795
YDR498C	11.1835	11.317	20.6948	19.3179	16.0287	16.209
YDR499W	8.44975	6.48744	33.7689	33.7172	20.5269	25.8616
YDR500C	889.958	1202.55	631.891	568.131	429.734	567.436
YDR501W	0	0	1.60804	1.78209	1.33045	1.76053
YDR502C	70.8288	68.3343	61.4552	66.5077	72.2876	62.2863
YDR503C	21.5593	26.4543	40.3409	41.7722	33.1345	35.8176
YDR505C	35.9114	33.3022	39.2922	42.9128	50.2402	44.4382
YDR506C	2.29883	2.30664	2.51694	2.28108	5.51185	4.97804
YDR507C	28.7664	27.3193	44.8854	48.2591	43.9681	40.735
YDR508C	66.6039	56.6569	152.205	156.61	104.535	93.4294
YDR510C-A	0	0	3.56566	3.35033	0	0
YDR510W	400.99	345.636	426.761	429.057	298.463	335.472
YDR511W	55.9796	64.1535	121.582	106.498	73.428	78.0096
YDR513W	127.181	175.882	215.058	167.944	159.21	157.051
YDR514C	14.2279	12.3261	14.1228	14.0429	15.2685	15.9055
YDR515W	9.75449	10.0916	16.2902	18.8189	10.9603	11.1702
YDR516C	53.4322	44.6191	147.101	158.963	94.5884	81.4092
YDR517W	84.249	77.3446	101.027	114.125	128.483	111.035
YDR518W	65.5477	56.5849	38.5231	38.6358	50.2402	49.9626
YDR519W	151.971	233.043	330.208	306.876	213.948	250.481
YDR520C	3.41718	4.10871	6.15251	8.91046	4.24476	3.8853
YDR524C	75.9856	68.7668	104.523	113.341	120.881	119.23
YDR524C-A	0	0	1.18855	1.85338	0	0
YDR524C-B	4633.01	7077.94	6069.17	5040.33	6134.31	5140.38
YDR525W-A	176.451	234.341	976.362	884.845	437.4	444.624
YDR527W	26.4055	20.6877	25.0295	24.0939	19.7033	17.1803
YDR528W	30.3818	29.5539	58.6586	64.583	57.0825	58.7045
YDR529C	427.085	390.399	533.94	537.55	537.627	537.143
YDR530C	14.6628	9.44282	57.4001	73.9212	27.0524	28.1684
YDR531W	47.1571	47.142	41.0401	40.5604	55.4353	51.6624
YDR532C	19.8818	15.3536	51.9468	52.5361	36.809	39.6422
YDR533C	67.9087	65.9556	49.2201	49.3996	18.6263	19.6693
YDR534C	0	0	0	0	0	0
YDR536W	0	0	12.0953	13.7578	3.04102	2.06407
YDR538W	84.6839	66.0998	150.876	159.889	123.922	113.706
YDR539W	26.2191	22.2735	35.3769	38.7783	15.5852	16.0876
YDR540C	7.14501	6.99201	5.10379	5.98783	10.5169	9.53113
YDR541C	19.3847	17.444	54.6735	57.8111	43.1445	49.9626
YEL001C	280.954	267.643	295.81	290.196	271.601	265.84
YEL002C	243.987	221.726	185.205	190.898	221.488	221.766
YEL003W	189.809	152.599	240.717	235.022	155.599	168.829
YEL004W	37.3404	30.9234	50.4786	47.6175	45.8054	45.8344
YEL005C	12.364	12.4703	34.3282	35.0716	25.3418	24.4046
YEL006W	31.8108	28.0401	46.6333	44.8374	40.3569	43.7097
YEL007W	114.569	95.2932	126.616	134.797	108.273	102.232
YEL008C-A	6.15092	6.55952	22.7923	23.0246	12.0374	10.0168
YEL009C	807.262	810.497	1427.17	1415.41	1970.71	2000.38
YEL009C-A	0	0	11.6059	12.6172	1.64722	2.12478
YEL011W	5.71601	4.90162	55.5124	61.304	38.1395	33.0858
YEL012W	12.2397	12.0378	29.5041	32.9331	20.4635	25.1938
YEL013W	104.814	102.285	98.2305	102.862	123.985	110.67
YEL015W	33.6126	30.4909	59.2879	58.2388	42.701	39.5208
YEL016C	14.9113	11.8936	39.1524	38.707	28.6996	28.7755
YEL017C-A	1177	1153.32	391.524	371.245	807.771	818.281
YEL017W	55.9175	49.8091	67.0484	64.4405	48.8464	46.0773
YEL018W	19.3226	17.0115	20.8346	20.3159	22.2375	24.3439
YEL019C	2.36096	1.6579	6.15251	7.27094	3.16773	3.15681
YEL020C	2.05031	2.45081	5.87285	6.62938	4.62489	4.24955
YEL020C-B	35.9736	39.285	12.7245	13.0449	29.9667	33.9357
YEL020W-A	216.525	229.295	233.166	221.265	191.268	206.892
YEL021W	90.7106	84.4087	94.3152	92.9539	105.042	106.36
YEL022W	27.9587	24.5802	23.4215	26.1611	32.2475	32.2966
YEL023C	4.10061	3.89246	10.4872	9.83715	7.28578	6.67787
YEL024W	310.404	282.924	461.089	461.562	448.424	422.405
YEL025C	24.4794	26.0218	62.7836	71.1411	52.4576	57.4903
YEL026W	1390.92	1613.43	736.833	648.824	1003.54	1046.12
YEL027W	2600.6	3792.48	4251.88	4507.41	3750.59	4458.69
YEL028W	8.63614	10.9566	53.6247	57.5259	18.4362	19.6086
YEL029C	77.9738	71.6501	104.663	133.158	119.297	125.301
YEL030W	1.24261	1.94623	7.76056	7.05709	1.90064	3.03539
YEL031W	214.537	201.327	125.567	123.606	224.465	180.727
YEL032W	18.2042	14.4886	25.9384	23.2385	29.0164	26.7722
YEL033W	0	0	12.9343	12.6885	18.4995	22.2798
YEL034W	5863.13	6101.72	3361.23	3208.34	5924.86	5899.77
YEL036C	42.1866	41.2313	48.8705	49.9699	41.1805	40.9171
YEL037C	67.101	69.3435	67.398	61.2327	64.2416	69.2677
YEL038W	205.963	207.021	272.598	272.589	243.598	251.998
YEL039C	16.8995	17.9486	118.296	116.05	44.4116	46.8058
YEL040W	202.856	189.001	212.541	211.071	311.008	324.605
YEL041W	0	0	13.2139	14.0429	7.28578	9.16689
YEL042W	189.995	187.919	169.963	191.896	174.542	182.366
YEL043W	18.577	16.5069	23.0719	23.6662	20.2101	18.3945
YEL044W	61.6335	67.9018	109.277	102.934	49.4799	51.0553
YEL045C	0	0	2.37711	1.99594	2.0907	1.27487
YEL046C	225.161	228.934	308.954	308.231	216.989	195.965
YEL047C	92.823	85.1296	98.8597	107.139	91.9909	88.2692
YEL048C	35.725	35.4646	116.828	126.243	126.202	129.854
YEL049W	0	0	20.2054	23.7375	1.77393	2.42831
YEL050C	90.7727	76.1192	88.7919	111.559	97.376	91.851
YEL051W	225.969	201.327	146.052	138.077	228.583	227.654
YEL052W	43.7399	37.9155	72.1522	73.2796	75.5187	69.1463
YEL053C	50.7606	46.7816	67.1882	74.4915	73.8081	70.664
YEL054C	3231.47	3260.59	2010.33	2003.29	3343.03	3456.71
YEL055C	110.779	98.3928	75.578	76.3448	113.912	112.674
YEL056W	34.4824	31.9326	51.5273	53.0351	49.9234	46.7451
YEL057C	0	0	4.26481	5.84526	1.96399	1.69982
YEL058W	132.338	122.829	168.075	168.657	151.291	126.515
YEL059C-A	74.3081	64.0094	94.0356	83.9009	75.9622	80.3772
YEL059W	0	0	1.53813	1.49696	1.71057	1.21416
YEL060C	23.9824	22.5619	52.3663	46.3344	39.9767	32.9037
YEL061C	17.7072	12.254	21.6037	25.6621	13.8113	14.8127
YEL062W	26.0948	22.4898	45.0951	46.4057	45.4886	44.5596
YEL063C	60.0802	52.6203	207.647	249.636	116.192	111.095
YEL064C	9.31958	7.20826	16.7796	16.1814	13.4945	10.9881
YEL065W	31.6244	30.7793	138.501	135.582	46.1221	39.3387
YEL066W	81.2046	89.022	114.031	117.333	105.612	112.735
YEL068C	39.7635	41.9521	51.3176	50.3263	58.5396	64.411
YEL070W	0	0	5.80294	6.20168	0	0
YEL071W	314.38	313.127	306.787	295.043	274.135	249.206
YEL072W	9.69236	9.65907	49.9892	54.1756	30.4736	31.4467
YEL073C	6.08879	6.19911	87.5335	90.0313	31.7407	28.5327
YEL075C	0	0	0	0	16.6623	0
YER001W	196.146	161.321	96.2029	97.4448	176.886	171.378
YER002W	162.596	116.053	157.448	164.879	132.855	145.517
YER003C	327.614	275.644	256.448	270.023	377.593	353.198
YER004W	152.53	165.574	180.031	166.875	153.318	152.802
YER005W	9.69236	8.07325	10.1377	9.69458	14.0014	9.83467
YER006C-A	0	0	5.03387	4.77601	0	0
YER006W	80.2726	73.1639	64.6713	63.2286	67.2192	72.6673
YER007C-A	183.409	223.961	136.893	123.891	118.79	129.065
YER007W	3.78996	3.17164	2.37711	1.92466	2.0907	2.06407
YER008C	34.296	33.4463	36.0062	40.3466	51.8874	51.2374
YER009W	1945.99	1968.5	1302.45	1165.35	1669.08	1469.86
YER010C	34.1097	31.0676	48.8705	43.8395	44.6016	41.1599
YER011W	6.08879	5.47828	2.93643	4.20574	0	0
YER012W	126.933	120.162	139.83	152.618	127.026	137.685
YER013W	4.65979	5.18995	8.31988	8.62533	7.66591	10.1382
YER014W	8.26336	7.56867	13.0042	12.7598	9.88332	8.92406
YER015W	0	0	22.2329	18.9615	5.63856	6.55645
YER016W	41.2547	35.753	38.3134	35.5706	46.1221	42.3741
YER017C	41.5032	34.8159	60.9658	65.8661	38.4562	38.9137
YER018C	24.7901	21.5527	51.3176	55.6013	23.948	25.6187
YER019C-A	819.812	675.342	518.978	480.88	443.862	468.725
YER019W	54.0536	53.9899	64.112	65.7236	77.6727	72.1209
YER020W	23.2989	21.6248	33.0698	36.426	32.7543	33.5107
YER021W	36.4085	34.023	37.9638	29.4402	40.9271	35.1499
YER022W	17.148	14.4165	22.3728	25.5908	25.3418	31.5074
YER023C-A	0	0	4.6843	3.99189	0.886964	1.45699
YER023W	49.2074	54.927	29.1545	21.3851	47.3892	46.4415
YER024W	0	0	0	0	0	0
YER025W	325.875	252.938	288.259	302.385	355.799	312.646
YER026C	73.314	90.3195	205.969	211.214	113.721	129.551
YER027C	60.7636	54.927	61.9446	62.9435	74.9485	76.9776
YER028C	3.85209	3.17164	2.30719	2.70878	3.23108	3.70318
YER029C	37.2162	32.7976	42.0189	40.2753	30.727	33.45
YER030W	122.273	87.8687	148.359	169.441	139.253	140.174
YER031C	148.554	144.742	127.804	112.842	132.728	132.586
YER032W	8.63614	9.01033	15.3114	16.4665	10.7703	10.8667
YER033C	5.03257	6.55952	12.305	12.9736	9.94667	10.5632
YER034W	5.28109	4.18079	12.6546	14.4706	5.70191	7.34565
YER035W	38.086	39.9338	102.216	100.225	64.3049	65.9287
YER036C	258.277	229.006	174.578	187.69	322.475	294.797
YER037W	45.1068	42.5287	29.5041	23.6662	38.0128	36.9711
YER038C	17.5208	14.849	35.5867	34.43	36.5556	36.1819
YER038W-A	1.98818	1.6579	5.10379	6.20168	2.40747	3.21752
YER039C-A	5.21896	4.61329	25.3092	22.0267	13.938	13.9021
YER040W	16.2782	16.7953	48.2413	53.3202	41.6873	46.4415
YER041W	10.5001	7.42451	23.4215	24.5216	22.3642	19.9122
YER042W	76.9797	82.5346	78.9339	77.2715	65.572	73.3351
YER043C	975.946	857.567	940.775	984.713	1085.58	1065.79
YER044C	394.467	421.683	420.818	424.494	280.914	281.684
YER045C	17.8936	21.2644	27.6164	23.3811	22.6809	27.44
YER046W	17.3344	16.9394	78.6543	74.7053	27.5592	28.3506
YER047C	6.83436	8.64991	14.8919	14.328	8.10939	8.01344
YER048C	44.0505	38.1317	52.0866	50.3263	60.0602	61.8613
YER048W-A	131.903	145.174	171.781	154.971	265.773	257.705
YER049W	103.323	94.2841	80.8916	83.1168	61.3272	69.207
YER050C	89.0952	85.4179	152.135	152.262	93.7014	111.278
YER051W	7.3314	5.69453	10.7669	11.1203	6.2721	7.7099
YER052C	138.924	126.865	192.476	208.291	205.015	193.172
YER053C	81.3288	78.2096	115.36	117.119	85.5921	94.4007
YER053C-A	339.481	317.452	1819.26	1635.46	594.203	617.52
YER054C	0	0	10.0677	8.55404	2.02735	2.48902
YER055C	421.866	412.457	562.256	597.714	1250.75	1289.56
YER056C	537.243	557.415	786.193	852.909	624.043	624.866
YER056C-A	2916.97	2749.74	2753.32	2424.64	2089.75	2280.37
YER057C	563.897	689.47	585.188	539.19	538.387	536.597
YER058W	23.0504	22.8502	32.3007	24.4503	31.2972	36.1819
YER059W	13.8551	14.6328	28.3155	33.0756	23.758	24.3439
YER060W	50.0772	40.0059	10.9766	10.7638	16.7256	15.2377
YER061C	15.222	11.8936	17.4088	17.4645	25.5319	22.5833
YER062C	39.9499	38.5642	48.0315	42.6989	53.6613	57.4903
YER063W	44.1748	42.3125	94.1754	92.3837	52.1408	61.6185
YER064C	11.432	9.37074	49.8493	50.8253	18.2461	18.4552
YER065C	5.03257	4.61329	8.31988	9.55202	6.65223	9.2276
YER066W	6.15092	7.49659	73.97	79.909	28.5729	28.2292
YER067W	17.3965	17.2998	152.275	140.999	63.3546	64.3503
YER068W	28.083	27.031	61.9446	67.4344	52.1408	60.7686
YER069W	22.6776	21.4085	85.8555	87.8928	45.9954	43.9525
YER070W	113.823	79.0746	161.084	193.963	131.461	113.645
YER071C	79.0921	99.6903	189.889	174.788	60.6937	69.207
YER072W	1202.35	1384.49	373.975	352.783	459.448	500.476
YER073W	128.486	131.551	158.008	173.861	166.433	179.877
YER074W	2643.59	2497.88	1648.38	1541.94	1961.2	1969.61
YER074W-A	155.326	138.254	122.421	114.624	124.682	123.662
YER075C	6.77223	6.99201	9.71817	11.6192	9.56654	8.43839
YER076C	5.84027	4.61329	34.4681	45.6929	20.0201	17.9088
YER078C	16.9616	17.8765	26.6376	25.0919	22.6176	24.526
YER079W	8.57401	7.28034	26.2181	23.0246	8.74293	9.71326
YER080W	35.6008	28.761	25.449	25.377	34.2748	28.9577
YER081W	126.436	133.425	216.247	213.138	131.587	148.127
YER082C	29.6984	22.4898	26.7774	26.0185	25.0251	24.0403
YER083C	114.569	103.366	172.76	167.374	142.801	130.097
YER084W-A	2.48522	2.73914	6.64192	6.20168	2.15406	2.12478
YER086W	175.457	126.361	131.72	147.272	140.837	125.058
YER087C-A	2.67161	3.17164	2.65677	1.42567	0	0
YER087C-B	213.232	229.944	159.476	137.863	197.223	198.333
YER087W	10.1894	10.1636	10.3474	10.55	9.12306	11.8987
YER088C	58.3406	56.5849	87.1839	99.4408	62.1509	61.8613
YER089C	112.394	105.024	115.779	112.129	112.644	99.6216
YER090W	66.2311	63.0723	104.103	101.722	106.626	102.718
YER091C	435.1	422.548	428.089	405.177	896.151	762.734
YER092W	60.453	52.4761	284.064	286.418	108.083	118.077
YER093C	9.5681	8.79408	11.466	11.9757	13.6212	13.9021
YER093C-A	30.5682	31.5722	51.3875	44.7662	37.2525	36.364
YER094C	186.019	173.287	332.935	396.48	279.964	289.03
YER095W	68.4057	59.3961	123.4	126.956	126.836	114.677
YER096W	5.71601	3.38788	2.30719	2.92263	6.52552	6.79928
YER098W	0	0	4.40464	3.4929	1.90064	1.09274
YER099C	46.2872	47.5745	84.667	82.0475	60.4403	58.2796
YER100W	18.2664	18.309	46.0739	44.7662	17.2324	18.0909
YER101C	3.91422	4.46912	23.4914	26.0185	9.05971	8.74193
YER102W	5165.59	5211.86	4127.01	4386.8	7653.11	8057.09
YER103W	2.858	3.38788	21.8135	19.5317	9.81996	11.1095
YER104W	9.94088	11.0286	30.8325	29.8679	18.6896	22.8262
YER105C	29.6984	24.7964	28.5952	27.7294	37.3792	35.0284
YER107C	47.0328	48.007	61.9446	60.3773	66.9025	72.3638
YER110C	198.818	187.487	83.6182	80.8357	183.031	180.181
YER111C	1.429	2.45081	6.572	7.05709	4.30811	5.70654
YER112W	69.027	70.3526	76.6268	72.7807	68.9932	77.1597
YER113C	49.6423	41.6638	48.3112	47.4037	45.2352	39.5208
YER114C	49.1452	47.8629	56.0018	59.1655	57.2726	55.0013
YER115C	22.0563	22.2735	29.7138	26.4463	40.1035	40.7957
YER116C	12.2397	14.9211	38.1735	38.5645	34.2748	34.4214
YER117W	4958.82	4822.76	3886.71	3868.64	3586.38	3483.84
YER118C	33.6747	26.9589	32.86	35.7844	31.3605	28.8969
YER119C	16.2782	15.2815	20.4851	18.7476	15.9654	13.5986
YER120W	664.734	630.507	503.527	515.88	701.715	668.94
YER121W	1.61539	1.58582	23.002	18.4625	4.24476	3.27822
YER122C	111.276	101.42	118.156	129.309	161.744	169.436
YER123W	46.5358	34.3834	71.6628	87.6789	64.495	71.5139
YER124C	172.35	147.193	285.113	316.642	318.103	303.175
YER125W	101.273	98.1044	112.563	116.05	152.368	135.379
YER126C	78.2845	64.3698	70.1247	75.3469	76.8491	71.1496
YER127W	26.9646	26.166	41.6693	40.9881	35.0351	38.7316
YER128W	17.3965	17.444	33.3494	39.2773	23.0611	26.8329
YER129W	20.0682	22.6339	34.1884	34.7864	24.3282	24.2224
YER130C	146.69	140.994	84.7369	83.6158	82.361	82.3806
YER131W	2544.99	2069.49	1440.18	1423.96	2458.67	2513.61
YER132C	31.3759	32.5813	31.1821	28.5848	27.876	24.4653
YER133W	207.827	188.929	175.417	178.352	153.381	158.448
YER134C	42.6837	38.4921	68.9361	73.9212	59.1732	62.4684
YER136W	46.2251	43.4658	44.6057	46.7621	74.6317	75.7027
YER137C	15.1598	13.047	49.6396	55.6726	28.1294	27.8649
YER138W-A	3.35505	2.81122	2.09745	3.0652	0	0
YER139C	14.1036	12.182	37.3346	37.7091	36.0488	35.8176
YER140W	14.9735	15.0653	16.7097	19.1753	25.3418	24.8295
YER141W	117.302	116.053	158.217	171.152	139.76	140.417
YER142C	17.148	14.0561	20.4851	19.8882	20.3368	20.5193
YER143W	16.7131	16.2907	27.4766	24.6642	19.0697	19.0016
YER144C	47.2813	41.5196	77.4657	72.2104	44.665	45.8951
YER145C	61.4471	58.7473	91.9381	88.7482	81.9808	82.0163
YER146W	217.581	202.985	163.95	140.999	128.103	143.271
YER147C	8.82253	8.57783	15.6609	18.3199	13.1144	11.6559
YER148W	170.051	158.582	131.86	119.044	174.479	179.27
YER149C	16.8995	14.6328	16.9194	21.1713	17.866	20.155
YER150W	37.2783	37.1225	133.957	141.498	50.6203	47.8985
YER151C	16.4646	13.4074	31.9511	36.2834	24.5816	27.8042
YER152C	48.8967	47.7908	55.5124	58.7378	42.5743	38.246
YER153C	10.9971	8.93824	25.0995	27.0165	8.61622	6.85999
YER154W	24.2309	25.2289	44.0464	44.2672	39.9767	36.5461
YER155C	52.7488	47.2862	74.6691	80.907	64.685	63.7433
YER156C	234.356	208.535	183.317	186.122	218.573	215.513
YER157W	10.5622	9.87532	8.52962	6.91452	11.974	12.8094
YER158C	22.1806	21.4085	6.572	7.62736	13.1144	13.6593
YER159C	63.9323	62.6398	187.861	175.643	67.8528	78.9202
YER160C	5.96453	7.20826	23.9808	24.4503	11.4672	11.231
YER161C	30.5682	28.2564	48.7307	46.976	30.8537	36.8497
YER162C	2.98226	2.8833	6.78175	6.1304	3.61121	4.31026
YER163C	45.3553	37.7713	95.0144	93.5242	65.6987	66.7179
YER164W	24.0445	22.8502	36.2858	29.5827	33.5146	30.8396
YER165W	741.714	687.236	383.204	435.187	654.453	650.91
YER166W	63.8702	51.3949	75.0886	76.131	65.1919	60.2829
YER167W	27.4617	25.9497	29.0846	25.9473	29.7767	33.5107
YER168C	22.4291	20.3273	35.0274	36.8537	28.8897	29.0184
YER169W	11.6184	12.0378	15.7309	14.4706	11.2771	11.5345
YER170W	15.4705	13.9119	32.0909	32.5766	19.7033	20.7014
YER171W	15.4084	17.8044	19.6461	25.0206	20.4002	21.6727
YER172C	19.0119	16.8673	38.3134	36.9962	28.763	24.0403
YER173W	9.69236	9.58699	34.9575	34.2162	18.4995	21.7334
YER174C	55.6689	50.4578	45.9341	46.1206	61.9608	58.2188
YER175C	5.96453	6.19911	21.6736	19.9594	17.7393	21.1263
YER175W-A	0	0	5.94277	5.06114	2.28077	2.48902
YER176W	22.5534	20.7598	21.8135	22.6682	21.2871	26.4079
YER177W	664.486	581.49	704.043	762.165	637.727	657.284
YER178W	196.705	173.431	104.523	98.5854	151.671	143.513
YER179W	0	0	0	0	0	0
YER180C-A	15.1598	14.3444	40.1312	40.9881	52.521	50.9339
YER181C	3.6657	6.12702	8.24996	8.12634	10.7069	10.6846
YER182W	35.725	28.1122	58.0294	58.5239	45.8687	46.0773
YER183C	12.6125	17.9486	21.8135	18.605	33.8314	35.0284
YER184C	7.95271	8.64991	28.0359	25.3057	17.6126	19.123
YER185W	1.05622	1.87415	11.536	14.1142	0	0
YER186C	16.8995	14.3444	36.2159	32.5766	33.0711	34.907
YER187W	2.05031	1.87415	1.60804	1.42567	1.26709	1.33557
YER188C-A	0	0	2.51694	2.92263	0	0
YER188W	5.0947	4.82954	5.52328	4.13445	3.86463	3.94601
YFL001W	30.8789	27.9681	24.8198	28.7986	36.8724	41.0992
YFL002C	21.3108	19.0298	30.6926	32.7192	24.7716	23.9796
YFL002W-A	71.9471	60.5494	32.021	38.2081	20.4002	20.0943
YFL004W	84.6839	81.6696	15.9406	17.1081	42.4476	47.2307
YFL005W	196.581	197.651	165.209	151.478	244.866	227.837
YFL007W	35.3523	27.4635	42.9278	50.3263	54.9284	51.2374
YFL008W	11.432	10.0195	14.4724	17.1081	13.8747	15.5412
YFL009W	28.3936	25.1568	32.1609	39.3486	33.5146	33.3286
YFL010C	215.904	204.354	346.988	350.93	275.656	286.845
YFL011W	1.24261	1.44165	45.165	43.5543	8.55287	8.4991
YFL012W	6.58583	6.84785	6.92158	6.27297	3.54786	3.8853
YFL013C	4.72192	4.61329	11.0466	16.7517	10.6436	10.6239
YFL014W	28.4558	25.0127	980.627	997.259	251.835	272.032
YFL016C	23.4232	22.1294	61.7349	71.9965	32.8177	39.3994
YFL017C	77.7253	77.0563	168.425	157.109	72.4143	82.3199
YFL017W-A	49.1452	41.88	45.3049	41.7722	32.1841	37.4568
YFL018C	42.1245	38.6363	44.8155	39.4912	39.2165	35.0284
YFL020C	0	0	3.98515	3.84932	0	0
YFL021W	16.7131	16.0023	68.5166	74.3489	128.23	130.704
YFL022C	19.3847	17.2277	3.98515	3.84932	19.0064	21.612
YFL023W	16.651	13.7678	17.269	18.6763	14.5082	15.0556
YFL024C	3.29292	3.38788	10.7669	9.33816	2.02735	1.33557
YFL025C	33.4883	27.9681	29.3643	30.4381	34.9084	28.5934
YFL026W	482.568	405.465	13.6334	15.6111	412.122	402.675
YFL027C	8.20123	5.62244	5.59319	6.34425	12.1007	12.5058
YFL028C	54.4263	47.2862	101.447	105.714	101.874	105.996
YFL029C	9.75449	8.00117	15.1715	18.8902	13.5579	11.7166
YFL030W	2.17457	2.01831	4.61438	5.06114	3.42115	2.42831
YFL031C-A	0	0	0	0	0	0
YFL031W	1540.77	1270.67	1009.5	982.004	2700.3	2594.35
YFL032W	0	0	0	0	0	0
YFL033C	15.719	15.1373	23.4914	24.0939	16.4088	14.3271
YFL034C-A	583.406	556.766	1190.37	1236.77	834	883.239
YFL034C-B	11.9291	10.5961	16.0804	16.8942	10.9603	8.92406
YFL034W	12.6746	12.4703	26.4278	27.7294	14.8883	16.4518
YFL036W	37.8996	31.7884	45.4447	42.4138	58.5396	61.3149
YFL037W	337.493	294.025	190.169	191.254	238.403	211.992
YFL038C	183.782	161.465	245.122	244.931	177.076	191.473
YFL039C	1231.8	1141.57	864.848	916.352	978.258	901.148
YFL041W	36.7813	32.5813	23.841	23.3098	56.4489	52.998
YFL041W-A	2.36096	3.89246	13.7732	11.8331	13.1778	14.9948
YFL042C	7.89058	6.12702	20.2054	20.7436	9.88332	10.9881
YFL044C	46.5979	35.4646	80.9615	76.4161	105.612	105.753
YFL045C	1701.57	1611.33	1169.47	1120.29	1064.55	1098.27
YFL046W	30.7546	27.8239	36.6354	36.8537	44.9184	52.9373
YFL047W	38.0239	37.9155	54.1841	46.477	57.526	55.0013
YFL048C	20.8137	20.2552	23.002	23.0246	22.0474	22.7047
YFL049W	10.9971	10.6682	48.521	45.479	18.6896	17.7267
YFL050C	4.84618	3.60413	31.8113	32.0064	22.2375	23.0083
YFL052W	0	0	21.9533	24.2365	5.76527	4.49238
YFL053W	0	0	0	0	0	0
YFL054C	1.429	1.87415	10.9766	12.2608	6.33546	4.79592
YFL055W	0	0	9.22877	11.049	1.07703	1.39628
YFL059W	0	0	0	0	0	0
YFL060C	0	0	1.46821	1.63953	0	0
YFL061W	0	0	0.978809	2.35236	0	0
YFL062W	0	0	3.42583	3.42162	0	0
YFL064C	6.95862	5.98286	49.4298	48.6155	11.784	10.4418
YFR001W	172.723	140.561	195.202	202.303	172.768	187.527
YFR002W	52.8731	42.745	61.1056	65.0107	67.2826	64.1682
YFR003C	38.3345	33.7347	71.7327	64.5117	47.0725	52.3909
YFR004W	127.989	110.07	169.753	172.079	144.765	158.023
YFR005C	26.4676	26.2381	51.5972	49.3283	42.7644	37.8817
YFR006W	0	0	3.286	3.0652	8.80629	7.95273
YFR007W	23.6096	20.039	29.3643	23.6662	29.9667	28.6541
YFR008W	7.89058	7.64076	26.2181	30.153	20.5269	22.0977
YFR009W	37.5268	33.5184	52.1565	55.7439	71.8441	77.4025
YFR010W	49.7665	42.745	64.951	78.5546	58.0962	55.1227
YFR011C	76.9176	71.6501	95.8534	102.862	106.689	118.077
YFR013W	14.2279	9.9474	17.0592	18.4625	16.0921	19.6086
YFR014C	11.0592	8.93824	11.6059	11.1915	13.6846	13.72
YFR015C	3.47931	3.09955	33.2795	35.1429	19.5132	16.634
YFR016C	12.1776	13.2632	17.0592	18.1773	13.4312	15.1163
YFR017C	4.59766	3.67621	99.6288	116.549	26.9257	28.8969
YFR018C	85.4295	87.1479	221.7	237.874	61.7707	65.868
YFR019W	8.82253	7.71284	20.6948	19.3179	11.784	12.2023
YFR020W	15.7812	12.9028	68.9361	79.0536	42.1308	45.1059
YFR021W	26.0327	25.7335	33.4193	36.6398	48.9731	48.6877
YFR022W	22.3049	24.2198	64.3916	67.5057	40.6736	37.1532
YFR024C-A	15.4084	15.2815	24.8198	23.0246	17.5492	17.7874
YFR025C	8.82253	8.57783	10.2076	10.6926	9.6299	11.6559
YFR026C	0	0	3.77541	2.6375	1.26709	1.76053
YFR027W	3.6657	3.17164	15.8008	16.7517	6.58888	9.65255
YFR028C	13.6687	11.5332	24.5401	25.5908	18.4362	19.3051
YFR029W	5.59175	6.70368	13.7033	13.6865	11.0237	9.59184
YFR030W	34.1718	31.2118	41.5295	37.4952	44.7283	35.6355
YFR031C	8.38762	7.42451	13.7732	14.328	12.4809	15.7233
YFR031C-A	1241.86	1182.8	796.82	763.377	1484.84	1374
YFR032C-A	2360.21	2399.7	1126.89	987.921	712.803	876.318
YFR033C	183.844	146.328	199.957	199.523	182.651	216.97
YFR034C	36.9055	36.8342	107.459	106.427	63.2912	64.2896
YFR034W-A	1.36687	1.6579	14.0529	15.5398	3.04102	2.61044
YFR035C	0.745566	1.80207	3.14617	2.06723	0	0
YFR036W	20.006	17.5882	52.2964	52.5361	27.4959	31.9323
YFR036W-A	0	0	0	0	0	0
YFR037C	70.0832	60.4773	77.1861	68.2898	64.2416	67.3857
YFR038W	24.293	19.7506	34.9575	32.0064	30.7903	30.6575
YFR039C	19.1983	18.6694	20.2753	22.9534	22.871	21.9762
YFR040W	25.0386	22.0573	30.7626	25.8047	15.1417	18.9409
YFR041C	32.9913	30.2026	46.9828	47.9026	27.9394	31.9323
YFR042W	72.5063	87.8687	142.976	144.635	115.939	118.805
YFR043C	5.59175	4.75745	10.2775	7.34222	5.70191	7.64919
YFR044C	268.093	239.026	202.893	199.879	222.565	201.732
YFR045W	21.2486	21.6248	39.6418	45.3364	41.9407	39.1566
YFR046C	7.45566	7.0641	16.5698	18.1061	11.4672	14.2056
YFR047C	29.8226	32.0047	51.3176	55.6013	39.85	43.1026
YFR048W	16.5267	15.2815	20.9046	24.3077	27.0524	22.5226
YFR049W	50.3257	60.7656	57.6798	48.4729	64.2416	73.5172
YFR050C	140.415	137.822	180.52	163.24	176.886	174.657
YFR051C	125.069	124.847	154.931	165.521	109.73	105.571
YFR052W	200.185	175.521	220.512	231.815	254.369	261.044
YFR053C	59.024	57.594	491.362	488.151	348.007	329.462
YFR055W	143.894	123.261	247.848	255.837	171.374	152.316
YGL001C	98.2283	97.0953	110.046	117.476	103.648	100.472
YGL002W	97.607	94.3561	180.38	194.319	164.469	159.48
YGL003C	17.5208	14.849	43.7667	49.1145	26.3555	24.6474
YGL004C	19.509	16.3628	25.1694	25.2344	22.2375	22.1584
YGL005C	19.7575	17.8044	33.8388	40.1327	28.0027	31.2038
YGL006W	19.1362	18.6694	26.9172	24.878	19.7666	21.3692
YGL007C-A	8.38762	9.80324	33.6291	32.9331	16.7256	15.9662
YGL008C	2075.53	1431.78	887.08	850.201	1809.91	1232.86
YGL009C	359.487	377.569	415.434	431.552	266.216	265.597
YGL010W	15.2841	21.5527	102.845	101.579	44.3482	48.5056
YGL011C	195.835	182.513	242.255	241.937	216.483	239.978
YGL012W	258.898	244.793	222.749	218.057	242.078	207.499
YGL013C	14.6628	14.4165	19.5063	22.5256	19.2598	22.7654
YGL014W	56.663	54.8549	43.2074	38.3506	74.3149	59.858
YGL016W	35.8493	34.4555	21.1143	21.8128	51.6973	47.595
YGL017W	20.1924	18.2369	21.1842	21.6702	21.1604	22.8262
YGL018C	9.63023	9.37074	25.7986	32.0777	20.2101	22.0977
YGL019W	146.007	125.928	193.385	240.297	201.151	215.513
YGL020C	139.048	118.72	146.542	148.912	108.02	116.256
YGL021W	14.9113	15.8582	26.4978	24.8067	21.4772	23.4939
YGL022W	19.8818	22.9944	19.4363	20.5297	19.8933	17.666
YGL023C	24.7279	20.7598	43.2074	40.0614	42.5743	42.1313
YGL025C	13.2338	10.5961	17.9681	19.5317	15.6486	16.9375
YGL026C	109.412	99.6182	167.656	159.747	147.87	133.618
YGL027C	97.607	87.5804	58.9383	66.08	87.0492	79.7701
YGL028C	153.649	141.714	340.206	396.765	208.753	217.941
YGL029W	68.9027	55.5757	61.595	67.2205	59.8701	70.6032
YGL030W	749.356	985.658	712.014	632.999	411.932	467.147
YGL031C	1612.85	1617.89	904.699	809.569	1335.51	1284.46
YGL032C	153.214	128.74	0.769064	1.56824	128.673	127.244
YGL035C	18.1421	12.9028	34.8875	38.2793	22.1741	26.5293
YGL036W	10.5622	10.3078	25.0995	27.0878	9.81996	10.3203
YGL037C	166.572	170.115	394.18	438.038	203.812	212.174
YGL038C	30.2576	26.0218	39.2223	34.8577	34.0214	35.2713
YGL039W	23.2368	22.4898	22.9321	25.1631	26.1654	24.526
YGL040C	64.5536	63.1444	60.5463	59.7357	80.5237	79.4666
YGL041C	1.18048	1.80207	0	0	0	0
YGL041C-B	0	0	2.16736	2.42365	0	0
YGL041W-A	27.151	24.7243	49.8493	45.2651	30.0934	33.2679
YGL043W	70.3317	50.7462	83.0589	95.4489	123.922	119.898
YGL044C	18.8877	17.0115	26.3579	31.8638	22.0474	23.9189
YGL045W	1.49113	2.30664	6.36226	5.56013	1.58386	2.54973
YGL047W	24.6658	25.301	26.288	27.2304	31.7407	36.6676
YGL048C	158.06	138.11	181.639	189.543	185.692	195.297
YGL049C	17.8936	14.849	11.466	10.55	19.6399	20.155
YGL050W	62.7518	56.3686	53.6947	51.9658	80.7771	82.9877
YGL051W	1.11835	2.01831	3.14617	2.92263	1.3938	2.06407
YGL053W	16.5267	13.3353	29.9236	26.0185	16.2821	13.5986
YGL054C	224.229	256.902	415.434	478.1	495.243	544.55
YGL055W	748.797	578.751	485.769	489.576	558.281	509.46
YGL056C	34.6688	23.2106	64.3217	62.0881	37.4426	28.2899
YGL057C	21.8078	20.7598	22.2329	24.379	30.9804	27.5007
YGL058W	97.607	80.6604	156.609	171.794	137.226	141.267
YGL059W	16.8995	12.0378	36.3558	44.5523	26.799	24.0403
YGL060W	16.9616	16.7953	13.7732	13.6865	18.6896	17.4839
YGL061C	22.1185	18.7415	35.4469	33.7172	21.0971	26.2258
YGL062W	30.7546	27.6076	34.1884	31.0797	36.6823	32.418
YGL063C-A	0	0	2.93643	4.70472	0	0
YGL063W	9.94088	8.50575	49.7095	48.1165	24.5182	18.2124
YGL064C	1.55326	2.0904	3.56566	3.0652	2.66089	3.33893
YGL065C	35.4144	34.8159	29.3643	30.2956	39.0898	39.5208
YGL066W	12.4882	13.3353	30.6227	34.2875	15.9654	19.123
YGL067W	63.1867	69.776	64.2518	60.2347	84.2616	84.3839
YGL068W	158.806	221.654	188.001	182.7	201.531	224.498
YGL069C	0	0	2.37711	2.78006	0	0
YGL070C	84.249	75.9751	160.664	155.47	124.935	126.272
YGL071W	24.3552	24.5802	43.8367	45.479	37.2525	36.789
YGL073W	14.3521	15.3536	34.3282	36.4973	15.7753	17.0589
YGL075C	4.41127	3.67621	7.34107	7.27094	9.05971	10.806
YGL076C	2444.96	2626.62	1211.28	1030.05	1538	1642.03
YGL077C	113.637	94.5724	98.9296	101.365	167.193	148.734
YGL078C	66.4797	56.729	48.7307	49.5422	54.7384	53.605
YGL079W	44.9204	43.3937	109.347	105.714	76.0889	74.3671
YGL080W	55.7932	63.7931	106.76	99.0843	90.9772	92.3367
YGL081W	0	0	0	0	0	0
YGL082W	17.5829	14.7769	22.163	23.9513	21.2238	21.4906
YGL083W	16.0297	13.9119	12.0254	11.1915	14.5716	15.784
YGL084C	40.3848	35.9692	38.2435	39.2773	30.3469	27.8649
YGL085W	10.4379	9.08241	26.2181	22.4544	16.9157	19.0016
YGL087C	123.453	117.711	215.408	208.861	180.877	187.041
YGL088W	0	0	7.83047	5.7027	0	0
YGL089C	2.11244	3.67621	176.815	184.839	2.02735	2.48902
YGL090W	12.5504	10.7403	53.9044	49.9699	30.4736	36.364
YGL091C	38.5209	31.428	60.6162	62.8009	40.8637	40.0065
YGL092W	42.0002	37.1225	34.7477	33.931	45.0451	44.681
YGL093W	12.5504	11.0286	17.4787	23.3098	17.1057	16.9982
YGL094C	15.2841	15.4257	19.716	18.9615	23.3778	21.6727
YGL095C	41.3168	39.2129	73.0611	79.1962	60.3136	57.7939
YGL097W	37.2783	34.9601	32.0909	33.5033	28.953	28.5934
YGL098W	228.516	348.519	204.921	144.92	160.477	155.776
YGL099W	31.0031	30.7072	13.8432	13.9003	25.4052	23.1297
YGL100W	73.5625	64.8744	95.2241	92.1698	88.5064	84.1411
YGL101W	94.5626	86.4991	92.9868	87.8928	82.8045	86.2052
YGL103W	3756.91	4711.25	3720.24	3165.07	3873.06	3981.4
YGL104C	18.2042	14.7049	45.165	43.7682	15.902	14.5092
YGL105W	474.242	437.469	461.369	466.908	470.725	487.12
YGL106W	116.06	113.818	150.037	138.504	143.688	168.768
YGL107C	37.154	28.3285	42.3684	43.4118	59.0465	53.2408
YGL108C	12.4882	14.9211	21.9533	25.7334	12.9243	13.5986
YGL110C	8.38762	8.79408	10.697	9.83715	8.67958	8.07415
YGL111W	48.9588	44.0425	54.3239	62.7297	56.1955	55.9727
YGL112C	38.7073	33.7347	45.0252	43.8395	45.0451	48.1413
YGL113W	8.26336	10.0195	13.9131	13.6865	10.3902	11.2917
YGL114W	25.225	23.4269	69.845	77.6279	37.0624	37.5175
YGL115W	67.598	64.3698	77.1162	80.8357	90.5337	83.7161
YGL116W	6.83436	5.69453	18.3876	16.6804	8.67958	9.34901
YGL117W	26.4676	25.3731	86.6945	96.8033	67.5994	61.5578
YGL118C	1.80179	1.80207	13.8432	9.69458	1.20374	1.5784
YGL119W	25.3493	17.8044	23.1418	21.1	25.8487	30.4753
YGL120C	102.08	90.1033	130.671	145.347	134.692	144.728
YGL121C	14.8492	11.8936	106.9	109.278	33.4512	34.1785
YGL122C	67.9087	61.919	70.5442	77.2715	100.48	105.814
YGL123W	6061.2	6258.28	5055.62	5227.23	6398.37	6655.65
YGL124C	4.16274	3.17164	11.466	10.8351	6.96901	5.70654
YGL125W	41.2547	35.9692	282.456	288.984	148.06	123.662
YGL126W	67.0388	59.2519	95.9233	104.573	104.725	94.0972
YGL127C	37.6511	39.5734	62.8535	64.7256	83.3113	83.6554
YGL128C	5.96453	6.77577	39.6418	41.9861	13.3045	17.5446
YGL129C	29.2635	24.8685	32.6503	40.4891	36.0488	36.8497
YGL130W	35.1037	31.3559	64.6713	61.7317	43.3345	43.4061
YGL131C	8.38762	6.99201	13.4237	13.0449	10.5802	10.4418
YGL133W	9.13319	9.01033	10.4173	11.1203	9.6299	10.381
YGL134W	7.95271	7.42451	26.0783	29.4402	16.8523	15.9662
YGL135W	1958.48	3830.83	2506.1	2387.08	3868.56	4393.37
YGL136C	20.0682	17.7323	45.4447	45.6216	43.8414	45.8344
YGL137W	85.9886	79.5071	81.0314	81.905	117.269	123.601
YGL139W	33.7369	24.5081	20.6249	23.88	25.2151	23.5547
YGL140C	58.8997	62.3515	68.3069	69.9293	74.0615	68.8427
YGL141W	14.0415	13.7678	17.3389	16.1814	18.3095	16.0269
YGL142C	33.9233	34.9601	50.4087	53.3915	52.521	50.2054
YGL143C	14.6007	13.9119	14.5423	13.4726	17.5492	17.241
YGL144C	10.4379	8.2895	10.8368	10.6213	14.0014	12.6272
YGL145W	29.9469	20.7598	38.8727	37.9942	32.7543	30.2932
YGL146C	0	0	8.59953	8.19763	7.15907	5.82796
YGL147C	6938.05	6922.81	3780.58	3643.17	4995.19	4812.86
YGL148W	241.874	209.472	202.054	202.517	260.894	242.771
YGL150C	43.9263	38.42	52.9256	52.3222	49.8601	53.7872
YGL151W	14.0415	13.8399	22.0931	22.6682	14.8883	15.2377
YGL153W	24.4173	19.3902	21.6037	21.8128	25.9754	27.1364
YGL154C	14.2279	16.579	79.7729	83.7583	50.0501	59.433
YGL155W	11.1835	10.7403	36.985	37.7091	43.4613	38.4888
YGL156W	4.41127	4.61329	20.6249	21.6702	12.4809	10.8667
YGL157W	60.0181	59.5402	84.5971	97.3022	154.078	133.8
YGL159W	13.4823	14.6328	14.2626	12.4034	24.4549	23.9189
YGL160W	31.9972	24.2918	32.2308	37.7091	31.0438	34.2392
YGL161C	109.909	102.574	231.698	238.016	168.016	180.242
YGL162W	18.0179	18.309	44.1862	43.982	23.5046	22.037
YGL163C	3.10653	2.81122	6.78175	7.69864	2.47083	3.27822
YGL164C	13.2338	12.0378	20.6249	22.1692	18.4362	17.666
YGL165C	0	0	0	0	0	0
YGL166W	27.151	23.4269	44.3261	41.4158	41.624	43.2847
YGL167C	91.394	100.988	98.0906	111.416	135.832	134.771
YGL169W	20.2545	16.5069	25.0295	24.6642	18.4995	21.6727
YGL170C	0	0	0	0	0	0
YGL171W	23.2989	18.8856	17.3389	14.1855	18.753	19.3658
YGL172W	47.7162	43.2496	49.9892	47.6888	58.7297	54.2121
YGL173C	58.8997	52.1878	66.4891	73.8499	2.53418	3.0961
YGL174W	5.46749	5.4062	10.8368	9.33816	9.50319	10.1382
YGL175C	5.84027	6.70368	15.6609	15.6824	20.5902	21.6727
YGL176C	8.44975	9.44282	5.87285	7.91249	9.94667	11.838
YGL178W	9.31958	8.93824	13.8432	16.2527	14.1281	15.1163
YGL179C	29.2635	30.3468	60.9658	61.6604	34.4649	34.9677
YGL180W	6.64797	6.48744	13.9131	12.1895	11.2771	12.2023
YGL181W	43.6156	41.5917	85.1564	93.5242	62.3409	61.1328
YGL183C	0	0	0	0	0	0
YGL184C	3.54144	2.95539	18.2478	21.1	9.81996	9.95609
YGL185C	9.38171	6.84785	15.591	14.2567	16.789	15.0556
YGL186C	50.8849	37.2667	45.7244	45.7641	54.3582	42.9205
YGL187C	287.602	392.994	351.392	302.884	348.894	394.905
YGL189C	8426.08	7400	5890.89	5795.44	6377.46	7027.06
YGL190C	56.7252	50.9624	78.1649	75.5607	80.7771	86.5087
YGL191W	200.247	213.869	351.672	302.457	278.507	275.917
YGL194C	22.3049	22.9223	54.1841	62.1594	47.8327	46.9879
YGL194C-A	51.879	53.8457	148.29	146.06	78.2429	81.9556
YGL195W	126.684	115.26	147.031	148.555	224.402	185.22
YGL196W	39.9499	37.1225	16.2902	14.2567	27.1791	24.8902
YGL197W	23.8581	25.6614	36.6354	33.1469	25.7853	27.44
YGL198W	45.1068	46.4933	67.9573	62.6584	62.3409	64.6539
YGL199C	2.73374	2.66706	5.03387	5.63141	0	0
YGL200C	659.888	667.918	568.059	581.39	599.905	560.273
YGL201C	27.5238	26.6706	35.7964	30.7946	32.5009	32.5394
YGL202W	233.176	199.669	171.921	191.04	225.986	219.702
YGL203C	30.1333	30.9955	27.4066	28.4422	22.6176	27.9256
YGL204C	34.0475	31.3559	4.89404	4.77601	13.8747	13.1736
YGL205W	0	0	0	0	0	0
YGL206C	122.459	111.8	60.4065	62.8009	141.407	125.726
YGL207W	72.8791	61.7027	107.04	122.537	116.953	112.552
YGL208W	8.51188	7.20826	15.1016	17.9635	8.55287	9.10618
YGL209W	24.293	21.769	74.0399	69.9293	43.2078	50.084
YGL210W	43.1807	35.6809	52.0866	49.1145	53.3446	59.2509
YGL211W	20.8137	19.4623	38.593	30.9371	27.4959	25.9223
YGL212W	9.31958	7.85701	25.7287	29.8679	15.7119	19.0016
YGL213C	58.5891	52.9086	87.953	87.7502	96.1089	96.4648
YGL215W	82.3229	88.3733	52.9955	47.5462	87.6828	82.3199
YGL216W	14.9735	17.9486	19.0868	17.3219	22.6809	20.9442
YGL219C	24.3552	18.5252	37.4045	35.0003	29.3965	31.386
YGL220W	0	0	0	0	0	0
YGL221C	145.696	140.994	193.175	204.228	214.075	217.698
YGL222C	43.0564	41.3754	230.859	218.984	48.6563	50.9946
YGL223C	11.8048	8.86616	38.1735	47.2611	18.943	18.8801
YGL224C	32.1836	26.4543	51.5273	56.1716	47.8961	44.4382
YGL225W	487.476	410.943	367.263	352.997	469.774	466.479
YGL226C-A	149.548	141.714	98.7898	104.93	82.1076	79.0416
YGL226W	46.163	45.34	71.0336	66.5077	51.0004	50.9946
YGL227W	5.84027	6.34327	11.8855	13.1162	11.9107	11.4131
YGL228W	62.814	57.0174	46.2837	53.1776	69.7534	70.2997
YGL229C	2.79587	3.02747	5.10379	4.56216	5.76527	4.91734
YGL231C	152.282	157.356	170.103	145.419	151.037	150.98
YGL232W	56.7252	50.3858	65.4404	66.4364	64.4316	62.7112
YGL233W	33.6126	33.4463	35.6566	42.3425	42.2575	43.5275
YGL234W	152.779	135.083	194.713	212.639	252.025	216.545
YGL236C	15.7812	11.9657	12.5148	13.6152	15.5219	14.2056
YGL237C	2.42309	2.73914	5.66311	4.63344	2.66089	3.94601
YGL238W	81.4531	81.3813	76.2073	77.8418	103.711	99.5609
YGL240W	15.8433	12.8307	23.9808	24.9493	24.835	23.2511
YGL241W	10.2515	9.65907	13.144	13.1162	12.0374	11.0488
YGL242C	50.2015	52.4041	79.6331	74.4202	68.0428	75.3385
YGL243W	12.1776	8.722	51.9468	45.7641	23.948	25.3759
YGL244W	58.7755	48.6558	56.8408	62.9435	58.7931	61.8006
YGL245W	248.833	233.404	143.046	142.567	205.142	192.565
YGL246C	40.0742	43.4658	53.5548	59.6645	46.8824	50.2054
YGL247W	27.8345	26.7427	69.4255	67.5769	39.2798	51.0553
YGL248W	26.654	25.5172	64.881	64.2979	35.9854	39.0352
YGL250W	8.20123	8.722	22.5126	18.6763	14.1281	15.5412
YGL252C	53.1216	44.9075	78.095	77.129	53.9781	55.3049
YGL253W	1533.01	1286.39	940.845	1069.83	2649.43	2382.12
YGL254W	12.9231	9.73115	21.7435	21.8128	22.1108	23.1904
YGL255W	106.802	97.8161	54.6036	55.8151	60.3769	55.6691
YGL256W	87.5419	79.8675	265.537	274.015	223.958	203.432
YGL257C	32.1215	29.7701	33.4193	31.5787	35.2252	35.5141
YGL258W	1.80179	1.15332	8.18005	6.48682	4.75159	3.27822
YGR001C	147.436	148.562	145.493	131.875	135.452	133.193
YGR002C	17.148	14.2003	27.4766	28.8699	22.4275	20.8228
YGR003W	17.0859	14.7769	41.5295	43.5543	25.912	23.4939
YGR004W	9.50597	6.77577	4.05507	3.9206	10.01	11.4738
YGR005C	41.6896	35.1763	50.0591	51.4668	43.3979	41.7063
YGR006W	8.7604	7.49659	18.5974	19.1753	17.5492	17.9695
YGR007W	62.6276	60.1169	98.58	99.0131	93.7648	94.2186
YGR008C	137.992	137.173	420.538	373.74	155.409	187.952
YGR009C	20.2545	18.9577	29.8537	32.9331	19.5766	20.155
YGR010W	16.0918	14.2003	23.7012	25.6621	23.758	22.4012
YGR012W	14.7249	15.0653	18.9469	17.0368	23.2511	21.4906
YGR013W	10.3137	10.8845	10.6271	10.55	10.1367	12.5058
YGR014W	35.0416	34.1672	36.3558	42.8415	34.7183	25.0723
YGR015C	10.3758	9.65907	40.6206	45.8354	19.8933	18.5766
YGR016W	1.55326	2.01831	15.8707	14.8983	6.58888	6.73857
YGR017W	118.98	105.169	108.718	99.7972	84.0082	88.5728
YGR018C	2.54735	4.32496	11.7457	12.3321	1.58386	1.15345
YGR019W	17.2102	17.2277	25.3791	26.7314	13.1778	12.263
YGR020C	360.73	338.14	217.715	187.761	268.814	283.566
YGR021W	13.793	10.1636	20.0656	22.8821	18.3095	18.6373
YGR023W	39.7635	39.0688	68.237	82.4752	50.8737	47.1093
YGR024C	168.809	155.626	246.59	252.416	258.867	271.121
YGR026W	158.495	152.959	179.332	199.666	154.649	156.748
YGR027C	5859.03	7495.66	4197.83	3679.38	4393.89	4266.31
YGR027W-A	52.0032	45.34	30.9723	31.2935	20.2735	20.9442
YGR028W	20.5031	17.5161	27.1969	27.5868	23.5679	24.101
YGR029W	36.7813	34.9601	57.1904	54.532	61.2005	62.7719
YGR030C	13.6066	16.6511	49.4298	46.3344	33.8947	33.0251
YGR031W	14.1036	12.6145	38.6629	38.9922	30.1568	27.3185
YGR032W	37.6511	33.8067	404.807	428.13	40.9271	38.6102
YGR033C	81.3288	72.0105	115.01	117.404	144.068	141.389
[truncated: 3,574 more rows]

## Sheet: Normalized RNA-Seq reads
Geneid	WT_1	WT_2	dcp2_1	dcp2_2	xrn1_1	xrn1_2
YAL012W	1005.51	974.235	818.355	845.817	560.586	521.063
YAL069W	0	0.390744	0.38678	0.381407	0.226578	0.207022
YAL068W-A	0	0.482683	0.238893	0.235575	0	0.255733
YAL068C	14.9892	15.2584	18.1243	21.5132	30.6722	31.3485
YAL067W-A	0	0	0	0	0	0.143009
YAL067C	11.0302	10.8096	8.64882	8.9332	22.9696	23.2743
YAL066W	0.440216	0.796662	0.78858	1.36084	1.84782	1.79386
YAL065C	8.61151	7.47411	26.2875	28.8716	25.7271	22.5799
YAL064W-B	21.4215	17.2835	43.4899	52.0305	41.0248	43.817
YAL064C-A	4.64133	4.36125	12.4714	13.7171	12.9256	8.81474
YAL064W	3.57965	3.455	14.7485	9.2742	26.2949	26.0848
YAL063C-A	11.4524	13.3236	29.7262	31.1711	28.8186	30.253
YAL063C	6.40892	6.46588	24.1277	25.2455	19.2771	18.1391
YAL062W	10.1476	11.0185	11.084	14.6025	9.89545	8.75663
YAL061W	16.2169	18.4037	57.9059	68.4547	40.0115	42.9806
YAL060W	119.926	121.424	216.314	219.478	266.884	259.911
YAL059C-A	1.44709	0.581959	2.01619	2.98228	0.506184	0.616662
YAL059W	157.314	158.912	154.535	149.192	202.5	198.595
YAL058W	51.0664	50.3267	50.7446	53.304	70.2131	72.1048
YAL056C-A	0.775081	2.104	3.99176	3.42288	5.08347	5.29499
YAL056W	55.6099	54.3005	55.0404	55.8668	111.716	116.94
YAL055W	27.6813	22.3274	32.31	34.8481	43.7038	52.2416
YAL054C	15.8444	16.3193	32.3075	32.3915	28.9386	27.9937
YAL053W	220.928	211.708	326.293	326.384	272.136	263.912
YAL051W	33.9201	32.7089	42.3169	43.9837	76.264	77.7192
YAL049C	176.871	176.072	192.125	190.105	200.583	200.608
YAL048C	29.5785	30.1058	55.0067	60.5548	91.5025	91.6049
YAL047W-A	1.64881	1.30544	2.39979	4.55087	4.32557	5.63194
YAL047C	20.1966	20.3165	25.6839	25.4235	41.3568	43.5968
YAL046C	114.88	100.502	117.399	110.215	110.556	110.696
YAL045C	0.660324	0.597496	0.591435	0.972031	2.19428	1.58281
YAL044W-A	171.565	173.907	253.733	251.651	184.86	182.907
YAL044C	263.436	268.602	324.182	320.967	343.851	332.162
YAL043C	80.7622	79.7333	93.5726	93.1899	119.604	115.296
YAL042C-A	1.7993	0.651239	3.54548	3.33731	0.944073	0.862592
YAL042W	363.174	351.944	288.725	307.193	285.859	269.6
YAL041W	77.0553	77.2576	71.9851	76.6527	156.893	164.517
YAL040C	346.895	351.316	438.692	464.857	513.219	478.614
YAL039C	108.905	111.232	105.29	118.289	168.032	160.574
YAL038W	2550.39	2435.27	1701.28	1703.31	1320.33	1267.51
YAL037C-B	1.25563	0.883682	0.874717	0.431283	0.36601	0.33442
YAL037C-A	0	1.32349	2.62012	1.29186	3.06976	1.75301
YAL037W	11.1664	11.7879	22.2759	21.6676	46.7823	46.5568
YAL036C	162.19	168.77	128.092	143.468	172.193	178.745
YAL035W	196.423	199.557	124.751	141.624	148.828	176.369
YAL034C-B	0.768512	0.173848	0.860421	0.848468	0.504039	0.828966
YAL034W-A	35.9611	31.7614	34.1	34.5929	65.7934	80.653
YAL034C	60.2373	61.0466	112.86	124.206	162.483	160.667
YAL033W	140.587	140.061	136.423	129.695	149.17	149.788
YAL032C	36.5721	35.1438	41.4134	39.5208	97.5729	103.967
YAL031W-A	1.76086	1.19499	4.73148	4.47134	2.19428	2.63802
YAL031C	28.0633	29.6254	34.0745	37.7322	81.032	80.2224
YAL030W	244.387	244.082	217.514	214.493	177.321	179.701
YAL029C	81.4743	83.0596	69.7878	75.756	100.14	106.161
YAL028W	13.1141	13.7277	40.9957	44.1357	50.4146	46.6798
YAL027W	29.5936	31.7106	39.4493	39.5891	72.28	80.7268
YAL026C-A	94.4112	93.2967	65.9247	65.1461	83.6746	82.7805
YAL026C	83.3949	83.2513	61.3521	63.527	85.8639	87.31
YAL025C	172.064	188.836	130.368	183.802	174.749	227.711
YAL024C	32.6963	32.0139	20.108	20.6374	70.3116	73.7419
YAL023C	426.814	421.456	265.954	272.403	303.612	283.901
YAL022C	140.578	135.995	174.051	178.436	179.532	170.164
YAL021C	214.672	211.211	162.787	169.534	221.653	210.006
YAL020C	77.9914	78.7395	95.754	123.44	107.841	116.594
YAL019W-A	2.86372	1.83547	4.38181	4.21555	3.44338	4.63348
YAL019W	85.7177	85.4631	78.9994	83.987	144.888	154.427
YAL018C	0.764976	1.95072	1.0589	1.41273	1.16764	1.33358
YAL017W	57.5215	56.7349	79.6824	81.4234	108.189	105.611
YAL016C-B	0.731326	0.330872	0	0	0.76744	0.701204
YAL016C-A	3.67056	3.71206	2.70746	3.24196	2.26578	3.41586
YAL016W	125.654	126.665	123.815	124.267	185.836	187.228
YAL015C	40.2412	38.0536	51.374	51.9619	53.7371	58.3919
YAL014C	108.308	114.189	202.901	213.848	284.93	273.797
YAL013W	52.9923	56.4389	40.7619	51.6379	79.4291	100.789
YAL011W	19.4117	19.1049	16.7702	16.8571	33.8808	38.2313
YAL010C	34.8786	35.7542	49.4495	53.9104	85.9641	87.2793
YAL009W	65.0487	64.4614	69.665	74.0882	106.921	106.137
YAL008W	73.9375	78.4482	65.4075	75.1649	73.225	79.1938
YAL007C	347.519	355.197	263.883	258.363	291.766	287.265
YAL005C	489.174	483.181	502.406	504.707	381.686	368.233
YAL004W	0.419836	0.284917	0.752071	0.556218	0.330426	0.503179
YAL003W	1303.42	1269.59	877.275	831.522	737.28	736.496
YAL002W	36.1315	36.9575	52.4132	55.7056	72.8367	72.1509
YAL001C	30.9507	32.9532	36.3268	38.3575	55.6037	58.6402
YAR002W	87.4937	90.9836	103.748	105.793	134.505	139.924
YAR002C-A	539.573	533.272	434.27	427.6	389.139	369.436
YAR003W	52.5099	53.8073	55.5916	62.4163	122.352	128.54
YAR007C	79.6405	81.3966	82.4969	81.4475	108.071	107.062
YAR008W	48.6279	55.819	51.3534	65.8756	90.12	103.528
YAR009C	95.8361	113.915	55.6081	61.9953	44.6994	39.8881
YAR010C	25.3444	39.7721	13.5373	15.7103	7.17495	5.42201
YAR014C	94.2288	93.5845	104.876	110.554	177.559	184.828
YAR015W	92.6045	96.8904	151.6	156.473	187.962	193.512
YAR018C	42.1704	43.9452	63.7588	59.9338	86.8959	90.2398
YAR019C	31.6698	33.0539	35.3636	42.0604	63.9297	64.1084
YAR019W-A	6.53582	5.72915	24.6964	22.369	25.0766	26.1435
YAR020C	19.8372	18.3161	54.7535	76.8773	109.819	108.881
YAR023C	12.721	14.0179	42.0784	45.8324	83.5977	83.5679
YAR027W	114.508	115.522	191.53	178.348	172.885	166.991
YAR028W	83.3525	81.707	76.9897	83.9297	105.539	101.564
YAR029W	36.5761	34.7371	50.9002	52.062	114.512	110.571
YAR030C	10.5401	8.63749	31.1714	27.5767	20.4516	18.7818
YAR031W	37.7599	38.8326	35.858	35.8286	46.4276	46.2009
YAR033W	43.8951	46.1784	65.3246	74.0456	83.166	80.7056
YAR035W	10.0834	10.1079	22.9622	22.0903	14.4196	12.2114
YAR035C-A	0.839671	2.27934	1.50414	1.48325	1.3217	0.402543
YAR042W	64.9244	69.03	66.0925	71.6918	101.595	101.072
YAR047C	2.1188	3.64268	0.569325	1.49711	1.22288	0.203153
YAR050W	5.27715	6.1222	16.7412	18.7349	7.99724	7.81582
YAR053W	0.916005	1.6577	7.58908	6.06783	5.52712	6.25771
YAR060C	0	0.732644	0.362606	0.357569	0.318625	0.194083
YAR064W	0	0.615421	0.609178	1.00119	0.832672	0.65212
YAR066W	13.4471	15.5867	13.0396	13.7419	11.1373	11.5613
YAR068W	68.7131	67.8736	64.8035	74.7804	41.8539	41.7303
YAR069C	3.23873	2.93058	1.45042	2.4519	0.606904	0.443619
YAR070C	4.30751	4.51309	1.0153	1.20143	0.594766	0.434746
YAR071W	29.7437	31.2971	6.85542	5.17711	17.0296	17.5338
YAR073W	12.514	11.171	7.43881	9.2189	2.59106	2.0984
YAR075W	2.86976	4.28458	5.14074	4.05546	1.05402	0.894257
Q0010	4.21788	4.13461	4.87972	6.20895	1.65981	1.68506
Q0017	2.93885	2.27934	3.38432	7.41624	0.660851	0.402543
Q0032	0	0	0	0	0.122632	0.112048
Q0045	560.422	619.908	491.859	462.42	384.719	366.406
Q0070	387.744	425.398	332.329	315.368	267.334	254.768
Q0065	373.483	415.106	333.389	315.888	261.761	248.457
Q0060	237.229	271.515	232.151	212.08	171.596	164.989
Q0055	270.834	298.329	264.927	240.005	171.084	165.521
Q0050	298.39	357.927	365.531	311.197	208.973	199.515
Q0075	16.7319	16.758	25.5111	19.9674	9.38222	9.2154
Q0080	6.94014	6.27981	7.04491	5.31245	2.42762	1.99628
Q0085	3.13908	22.881	21.3212	12.3994	7.5947	6.01957
Q0092	0	1.30941	1.72816	0	0	0.231248
Q0105	289.262	373.823	315.794	264.719	204.994	193.693
Q0120	171.222	226.425	191.937	160.661	125.04	118.399
Q0115	141.891	179.755	151.746	128.377	99.1812	94.3769
Q0110	145.812	192.948	171.69	145.031	106.188	99.4585
Q0130	990.757	1089.91	1099.95	994.691	494.196	452.532
Q0140	4.26149	4.37016	5.03831	4.41629	1.49064	1.68886
Q0142	1.15277	0	1.0325	1.01816	0.403231	0
Q0143	0.444532	0.804472	0.796311	0	0	0
Q0144	0.412202	0	0	0.546105	0	0.197612
Q0160	35.2555	44.3312	64.1013	56.2534	16.9357	17.3162
Q0182	31.4037	30.3912	26.0217	22.397	6.87285	8.13137
Q0250	266.835	307.792	304.75	281.526	173.757	166.782
Q0255	14.9543	16.5674	17.6872	16.2561	8.82718	7.8815
Q0275	486.925	544.99	583.833	540.941	296.59	276.869
Q0297	546.723	557.035	573.252	528.322	195.586	180.587
YER054C	5.86393	6.12806	36.9871	41.3607	24.029	26.845
YER114C	86.6773	86.293	61.3469	64.9188	117.285	118.365
YER169W	59.0814	62.1856	51.7457	55.6497	88.8492	91.8722
YEL077C	16.3736	17.3519	25.5651	34.0311	37.4265	40.5066
YEL077W-A	4.08362	3.18541	8.19805	9.20351	0.591072	0.675072
YEL076C-A	1.6716	2.1743	3.64945	4.61379	3.72757	4.85834
YEL076C	7.73116	8.41359	10.4805	13.8414	12.4435	13.8237
YEL075W-A	20.1151	22.6258	31.3547	37.3975	14.9275	12.467
YEL075C	2.0275	1.83459	3.63195	3.5815	3.67498	5.39015
YEL074W	16.0503	18.5171	35.5803	43.7689	37.6861	36.6457
YEL073C	16.5835	19.5643	115.819	112.727	77.65	80.2067
YEL072W	24.0392	26.1731	100.304	95.2859	127.208	130.846
YEL071W	325.014	316.213	281.505	275.741	272.037	268.064
YEL070W	1.98316	3.38502	11.909	11.7436	6.03043	5.55317
YEL069C	0.120378	0.36308	0.898492	0.850571	0.652664	0.692516
YEL068C	85.1699	93.8841	111.225	106.072	134.599	143.643
YEL067C	15.731	19.1534	36.675	37.698	45.5785	46.7463
YEL066W	71.7919	73.8506	77.6138	76.7581	81.6812	87.1908
YEL065W	89.2067	96.6019	218.942	218.066	148.209	147.081
YEL064C	40.6289	37.7015	59.0181	60.1548	104.758	104.89
YEL063C	155.821	151.547	343.38	342.472	381.214	365.746
YEL062W	30.7311	35.6665	44.4027	47.4916	91.4163	96.477
YEL061C	32.9082	32.1134	27.0813	28.7255	75.8282	83.5182
YEL060C	134.316	140.308	228.793	229.645	157.65	145.035
YEL059C-A	158.093	160.557	189.251	185.821	161.776	165.204
YEL059W	3.30162	3.98331	7.09722	6.221	6.46736	5.38157
YEL058W	185.757	185.472	193.052	204.939	198.213	192.247
YEL057C	10.5605	11.1337	15.4464	15.6597	31.7209	29.9585
YEL056W	84.3117	87.6184	90.72	94.8393	144.283	146.078
YEL055C	128.403	126.233	86.6426	90.1563	138.209	143.46
YEL054C	1111.98	1109.86	820.311	795.043	737.796	705.808
YEL053W-A	1.75897	1.06107	1.75051	1.20834	0.410183	0.655867
YEL053C	66.9014	69.5912	74.3075	75.294	108.565	113.573
YEL052W	87.9284	87.6875	111.245	112.134	122.895	123.029
YEL051W	315.543	309.946	206.378	197.2	180.281	186.586
YEL050W-A	0	0	0.63456	0.625745	0.929322	0.679291
YEL050C	128.604	125.792	113.177	113.689	134.713	137.872
YEL049W	3.1852	4.74705	37.9268	44.5158	21.038	20.8391
YEL048C	32.1545	35.5309	74.5878	69.8872	131.315	124.031
YEL047C	141.177	145.123	120.887	128.816	116.2	114.017
YEL046C	712.212	692.455	791.513	778.814	805.264	750.33
YEL045C	182.008	172.636	210.066	206.725	167.959	160.734
YEL044W	116.071	122.347	119.769	129.376	126.219	132.311
YEL043W	79.8582	81.8633	70.4448	73.5672	114.255	112.889
YEL042W	358.544	356.763	212.919	224.275	245.149	242.922
YEL041W	8.0903	8.23043	25.2596	27.1695	34.6547	35.9367
YEL040W	661.144	637.776	548.087	543.04	736.849	707.16
YEL039C	66.2235	66.7606	258.099	278.226	157.874	175.901
YEL038W	141.694	144.498	131.543	129.54	122.814	115.551
YEL037C	216.597	216.503	160.87	161.847	227.293	235.297
YEL036C	148.335	150.928	134.076	136.05	186.36	187.197
YEL035C	0.678776	1.22839	1.09433	0.599516	0.641065	0.911145
YEL034C-A	2.14304	1.12266	0.909221	1.79318	1.24279	1.24368
YEL034W	3324.62	3186.3	2366.67	2332.02	2080.25	1956.84
YEL033W	1240.6	1335.76	994.265	1017.5	900.901	799.079
YEL032W	91.5708	90.3082	94.2805	99.5424	168.872	161.587
YEL032C-A	0	0	0	0	0.440567	0.603814
YEL031W	306.041	309.971	186.527	191.873	214.409	196.923
YEL030C-A	0.647746	1.17223	2.90085	5.14899	6.11759	6.31417
YEL030W	18.4532	17.3654	33.6543	34.3665	49.1489	51.445
YEL029C	91.3364	87.8892	99.259	93.7858	140.578	139.556
YEL028W	25.0266	25.3095	90.5855	87.2468	95.4715	100.359
YEL027W	1014.43	1037.93	874.164	841.997	551.839	530.337
YEL026W	933.086	906.01	678.25	666.463	574.628	561.405
YEL025C	39.6411	40.1309	52.9252	58.5727	99.1643	102.8
YEL024W	407.555	405.627	475.121	455.357	417.272	399.876
YEL023C	11.9164	11.5636	31.1576	32.6597	48.6088	52.9748
YEL022W	68.914	69.7056	51.3072	54.5993	91.5532	95.1082
YEL021W	149.477	161.663	118.047	135.012	149.668	169.64
YEL020C-B	2.40451	2.48655	0.922997	1.51696	0.180232	0.823383
YEL020W-A	492.839	495.134	510.648	499.914	403.359	422.272
YEL020C	30.7939	29.1438	39.7432	41.1899	69.506	70.5591
YEL019C	24.363	26.1018	33.4139	35.9383	63.4713	66.5908
YEL018C-A	0.382097	0.576237	0.228157	0.449974	0.200483	0.366359
YEL018W	38.8648	41.7607	36.2606	45.6258	61.2184	78.1379
YEL017C-A	1339.14	1446.24	767.933	773.194	758.056	749.444
YEL017W	157.759	151.488	161.787	168.603	157.243	153.93
YEL016C	36.9897	37.4568	69.7965	70.3672	91.3821	92.1416
YEL015W	105.182	106.881	118.047	123.952	167.203	176.36
YEL014C	0.444532	0	1.39354	1.37419	0.349862	0.213111
YEL013W	200.32	200.251	187.558	193.737	250.48	243.972
YEL012W	42.5472	44.9623	63.514	68.2091	68.1672	80.6465
YEL011W	19.7448	18.9719	106.743	110.003	94.4539	89.7705
YEL010W	0.38754	0	1.04133	0.171144	0.305008	0.557367
YEL009C-A	3.33399	3.16761	17.7677	15.3124	14.082	17.5017
YEL009C	697.499	708.535	746.567	712.622	781.885	756.836
YEL008W	3.92728	6.62264	5.59612	9.46009	2.3416	2.39624
YEL008C-A	115.55	126.393	268.562	332.654	239.441	242.967
YEL007W	142.077	151.318	181.627	186.249	310.009	300.787
YEL006W	94.2606	100.433	143.169	146.782	211.319	212.715
YEL005C	36.45	38.491	76.7033	79.9539	94.448	94.1695
YEL004W	33.7092	34.0306	46.4136	45.0683	67.1409	72.0564
YEL003W	207.279	222.541	274.493	266.031	224.524	231.638
YEL002C	309.558	303.903	233.966	216.174	251.596	245.163
YEL001C	496.457	475.363	442.238	435.652	345.438	334.283
YER001W	205.466	200.624	127.531	130.85	201.706	201.106
YER002W	196.418	207.263	128.838	176.331	151.614	197.041
YER003C	227.344	227.133	170.145	168.992	159.425	153.602
YER004W	272.64	263.853	215.4	226.131	230.472	224.728
YER005W	86.3371	84.6245	82.8006	89.3298	167.364	169.437
YER006W	168.228	167.577	127.292	129.06	152.196	157.21
YER006C-A	1.49715	2.51587	15.3252	14.1678	12.5686	10.4585
YER007W	10.1343	11.7788	10.3682	13.8508	18.7712	22.4912
YER007C-A	216.995	230.501	196.365	194.737	176.927	183.752
YER008C	74.033	73.3412	47.3096	51.0855	79.4949	91.8105
YER009W	705.684	703.339	624.81	569.726	411.333	385.579
YER010C	136.895	137.139	170.915	174.506	158.385	149.433
YER011W	42.4972	44.4069	28.1098	29.6039	7.27714	7.672
YER012W	279.003	268.641	275.712	265.542	264.566	266.473
YER013W	24.3724	24.4522	19.9338	24.0251	54.9717	61.1338
YER014W	35.1402	36.7353	39.7094	38.8611	38.3734	38.7649
YER014C-A	3.68038	3.99624	1.71414	2.0804	9.19184	9.5983
YER015W	18.3499	20.3213	35.5967	35.3979	47.5493	45.8089
YER016W	79.3818	80.9859	63.5664	78.8766	108.127	125.919
YER017C	93.987	91.4517	113.095	115.702	138.029	137.784
YER018C	75.1619	75.3106	115.982	120.865	109.255	101.392
YER019W	133.94	134.843	118.31	127.809	179.425	164.531
YER019C-A	644.216	632.017	488.711	507.571	401.099	383.212
YER020W	77.7367	77.4063	76.3052	78.627	140.576	146.002
YER021W	177.605	184.117	177.406	181.246	227.055	225.255
YER022W	44.5843	43.5327	48.2856	47.5566	86.1719	89.8086
YER023W	434.701	427.793	265.675	271.613	255.065	243.276
YER023C-A	0.638623	0.28893	2.00199	2.25621	0.502619	1.37772
YER024W	13.4456	14.4531	29.6238	31.2277	55.6917	56.3665
YER025W	351.016	349.399	267.438	285.302	296.031	304.878
YER026C	248.564	238.096	385.886	382.26	258.347	243.191
YER027C	107.715	114.201	82.5353	83.2571	126.295	128.37
YER028C	24.393	25.5517	34.3402	34.6742	75.1363	71.8432
YER029C	85.1605	89.9702	71.8438	72.3705	108.567	129.927
YER030W	234.072	225.255	188.555	204.009	154.562	170.511
YER031C	177.928	192.869	133.348	173.331	125.06	141.244
YER032W	65.0664	68.0215	53.4622	58.6559	95.054	97.285
YER033C	31.4491	31.733	40.4422	44.956	72.5095	77.4934
YER034W	52.5336	52.1674	81.1145	75.3586	133.087	143.805
YER035W	193.015	202.471	346.592	348.086	455.281	434.002
YER036C	405.52	395.407	290.398	293.082	348.741	343.724
YER037W	137.294	132.067	89.8632	91.662	121.909	119.994
YER038C	21.6473	20.2935	36.376	34.9664	61.5231	62.7811
YER038W-A	16.2447	15.6682	22.0647	25.6999	22.9477	24.4759
YER039C	17.3207	14.6881	56.9378	62.154	81.1737	80.6889
YER039C-A	22.05	21.9191	77.8858	91.616	106.569	115.386
YER040W	46.6758	48.6051	74.3625	80.3967	141.019	149.649
YER041W	18.0772	20.2171	40.7989	42.6034	58.0523	57.0748
YER042W	133.208	144.153	128.421	118.303	89.7614	90.4743
YER043C	848.555	844.495	750.146	732.25	549.987	528.193
YER044C	378.106	393.346	388.538	371.987	236.709	222.844
YER044C-A	9.09062	8.12537	28.2496	27.9551	38.129	40.9767
YER045C	64.6358	67.3196	94.4433	97.9534	112.083	115.607
YER046W	29.5984	36.8968	76.2882	79.2611	93.4278	95.1008
YER046W-A	1.23661	1.49193	0.738397	0.910175	3.78487	3.06299
YER047C	22.8983	25.5169	20.012	27.9397	68.1	82.2654
YER048C	139.034	138.26	105.985	121.42	112.459	131.006
YER048W-A	347.942	356.081	422.577	405.536	451.146	438.751
YER049W	181.615	182.718	140.882	143.675	149.641	157.705
YER050C	188.545	204.255	290.857	285.664	255.707	268.354
YER051W	27.9595	26.2563	39.541	38.1793	62.1307	62.3019
YER052C	270.98	275.347	335.932	338.661	336.764	333.203
YER053C	157.643	162.954	225.726	241.484	191.155	187.764
YER053C-A	497.571	504.214	1297.44	1262.03	818.899	761.092
YER055C	419.796	427.904	426.084	409.347	524.152	514
YER056C	532.347	548.501	518.866	554.518	538.118	542.151
YER056C-A	1235.02	1196.71	1113.33	1046.82	690.416	719.826
YER057C	506.089	495.02	422.051	419.577	259.867	250.481
YER058W	54.3687	59.4527	61.2938	77.1289	63.0011	86.0436
YER059W	52.8813	53.9895	67.2363	71.3439	124.096	128.41
YER060W	93.5559	93.1469	24.0293	27.7836	41.7573	37.8451
YER060W-A	11.8266	12.5943	25.5449	26.623	9.85676	10.8277
YER061C	25.2299	24.4501	29.1067	31.0528	65.5719	67.5427
YER062C	148.401	139.594	146.267	134.662	118.148	118.862
YER063W	109.732	115.029	145.016	150.499	110.643	122.632
YER064C	109.278	113.76	186.164	184.093	256.455	256.316
YER065C	11.0105	11.507	15.5024	16.543	41.0367	42.267
YER066W	12.3107	12.0217	81.9879	84.8322	94.3951	97.8179
YER066C-A	1.08604	1.35122	4.37733	5.27574	2.63549	4.10015
YER067W	72.3517	73.8252	445.226	414.444	320.366	324.248
YER067C-A	1.25951	0.949724	3.38432	2.59568	0.881135	2.71717
YER068W	87.2915	91.6852	96.6604	98.723	236.227	235.395
YER068C-A	0.629753	0	2.82027	4.17164	3.05644	2.49073
YER069W	65.8617	69.591	150.132	153.076	168.366	163.986
YER070W	266.928	271.598	325.123	338.13	374.187	360.231
YER071C	66.0497	68.1648	83.6221	75.3654	85.7962	79.3327
YER072W	1107.92	1097.66	522.8	511.84	533.185	526.628
YER073W	239.635	254.122	254.623	254.891	390.285	383.157
YER074W	1268.92	1223.45	918.694	852.044	655.904	657.794
YER074W-A	385.673	396.684	340.951	375.098	311.353	319.867
YER075C	45.4398	47.6526	47.0599	48.7771	97.3649	97.701
YER076C	29.5548	27.8937	72.5786	74.5442	111.808	109.799
YER076W-A	15.2444	15.7392	16.98	16.3988	13.0233	14.6165
YER077C	42.4137	42.7847	69.7593	74.4573	116.277	126.023
YER078C	46.7592	46.5172	44.1416	46.4225	65.1455	64.3841
YER078W-A	7.83184	5.59474	31.0127	34.9507	38.2813	34.5821
YER079W	28.5807	28.778	57.4533	58.5531	48.3142	54.0342
YER079C-A	0	0.544621	0.539095	0.886011	0.421073	0.577097
YER080W	88.8433	90.8759	72.7198	75.8866	86.6199	88.9915
YER081W	67.4345	71.7555	105.548	116.053	180.834	181.692
YER082C	107.882	105.86	96.2611	95.6454	132.885	139.726
YER083C	230.992	231.321	277.751	286.005	222.808	214.523
YER084W	12.3022	10.0185	36.5192	44.7044	23.8829	26.0342
YER084W-A	0.13258	0.119965	0.474992	0.117099	0.0695633	0.0635594
YER085C	1.17264	1.17897	2.68412	2.30159	4.23856	4.49738
YER086W	319.95	340.455	269.502	284.464	213.415	213.719
YER087W	31.5903	32.9931	29.8782	33.0029	43.52	47.7317
YER087C-A	6.89991	8.69617	12.2498	15.6708	7.17598	7.67895
YER087C-B	904.933	917.942	687.221	674.78	569.829	542.778
YER088C	202.858	210.46	260.86	283.975	295.752	288.676
YER088C-A	417.736	389.387	542.808	561.039	538.043	489.694
YER088W-B	14.343	16.7462	6.63051	11.0335	1.45657	3.54895
YER089C	299.99	286.932	326.685	326.884	348.367	324.05
YER090W	158.698	161.77	161.568	174.223	177.961	186.885
YER090C-A	0	0	2.70746	5.33969	2.77557	1.81144
YER091C	498.587	490.895	487.342	481.954	525.206	498.727
YER091C-A	0	0.83165	0.548809	0.270593	0.803738	0.881243
YER092W	116.234	110.874	273.808	277.791	237.434	235.66
YER093C	27.8993	29.2443	28.678	31.2741	52.8598	55.1256
YER093C-A	73.7633	77.8939	100.647	92.4289	116.453	116.877
YER094C	348.211	343.162	411.343	408.739	449.77	445.193
YER095W	132.691	136.948	192.071	206.38	237.639	246.564
YER096W	10.297	11.1967	13.2602	14.5593	25.9935	27.4577
YER097W	134.584	130.357	50.7648	56.7949	111.059	104.734
YER098W	12.5517	13.5039	19.4722	19.7586	36.5683	39.1272
YER099C	131.691	129.451	159.265	169.795	206.844	212.978
YER100W	131.059	139.594	112.937	120.303	132.365	146.445
YER101C	20.5145	22.4655	50.3172	53.3814	59.6974	57.9494
YER102W	628.588	647.672	414.302	403.964	377.336	358.882
YER103W	21.7544	22.6197	51.5701	56.1166	51.7807	56.0336
YER104W	33.5185	35.7278	64.9984	65.0536	119.75	118.723
YER105C	93.5672	93.0058	77.854	83.2889	119.996	118.298
YER106W	2.24467	2.91123	3.08275	3.23818	5.84951	5.55988
YER107C	78.9153	78.3569	65.1898	63.9012	138.161	138.65
YER107W-A	0	0	0.37955	0.374278	0.111171	0
YER109C	41.7999	41.5666	74.3197	76.7164	99.0434	101.282
YER110C	370.227	371.113	181.058	183.666	229.61	222.349
YER111C	40.2443	42.6407	46.3473	48.211	124.009	133.543
YER112W	240.579	252.279	205.976	218.345	265.746	282.007
YER113C	90.6203	92.3277	68.4428	72.8166	120.501	116.235
YER115C	57.032	54.811	67.6864	66.4333	124.901	123.405
YER116C	37.5928	37.6712	79.5992	78.9304	91.8319	99.0036
YER117W	1251.68	1247.05	985.573	957.517	632.693	611.953
YER118C	167.076	172.028	162.447	164.054	203.19	207.952
YER119C	77.9099	80.8683	86.7411	105.337	78.4455	77.1457
YER119C-A	1.27982	1.32349	2.62012	3.55262	2.78197	2.71717
YER120W	655.704	640.038	472.589	477.467	494.991	480.173
YER121W	8.27989	7.84885	42.0244	37.61	27.5144	31.1883
YER122C	226.206	222.083	197.675	209.642	283.176	296.82
YER123W	87.0571	84.6742	85.7877	86.1216	179.653	187.893
YER124C	162.884	166.936	215.229	211.227	331.017	324.337
YER125W	254.308	259.667	207.421	221.128	291.7	285.993
YER126C	245.835	243.585	204.764	209.028	254.887	269.767
YER127W	138.813	138.498	125.352	135.189	186.338	206.444
YER128W	40.4524	41.0281	45.3897	47.3112	55.1616	62.0686
YER129W	66.9423	66.029	66.1941	69.1462	146.105	143.042
YER130C	154.97	149.836	120.189	121.541	145.182	151.819
YER131W	1578.85	1565.73	1042.88	1015.04	1006.15	996.656
YER132C	72.1624	70.1033	46.1688	48.6783	94.837	93.8956
YER133W	269.591	281.691	246.85	249.626	265.725	272.585
YER133W-A	0	0	0	0.175648	0.104345	0
YER134C	148.945	139.014	176.174	166.791	175.572	179.849
YER135C	0.86531	1.56596	2.94513	3.66849	2.81492	3.73351
YER136W	214.573	216.941	181.451	175.74	280.961	281.527
YER137C	26.1707	26.4342	50.833	56.7118	56.5227	61.8565
YER137W-A	1.55586	1.60894	0.796311	1.5705	0.466483	0.639333
YER138C	27.5513	33.2944	9.77136	11.4487	10.0595	9.25941
YER137C-A	16.3993	25.817	6.03192	7.71894	5.55654	4.70729
YER138W-A	335.533	345.222	431.646	379.881	209.358	202.778
YER139C	44.9427	44.4622	94.6417	93.0624	139.076	141.101
YER140W	44.4875	46.5525	39.9192	40.3712	90.0798	91.0665
YER141W	247.613	252.066	221.822	243.082	203.857	213.758
YER142C	18.3201	18.9254	23.451	21.8442	31.841	35.7165
YER143W	56.0172	59.4381	67.2604	69.1266	120.062	123.153
YER144C	70.7418	73.7335	80.4931	98.5044	117.02	124.45
YER145C	223.073	218.867	180.447	183.923	280.994	275.098
YER145C-A	2.63979	2.66964	2.36439	1.9201	1.87392	2.0844
YER146W	342.72	353.758	307.829	296.31	308.013	325.713
YER147C	31.2317	33.4789	30.7351	33.3517	52.9484	55.1606
YER147C-A	0	0.299475	0.444655	0.292319	0.520963	0.634666
YER148W	239.881	241.742	161.268	176.642	195.804	217.509
YER148W-A	0.587335	1.27548	1.05212	0.415002	0.862873	0.732086
YER149C	50.9427	53.356	42.1071	45.0418	71.9653	71.6919
YER150W	123.094	135.2	303.499	315.544	170.287	163.759
YER151C	87.2577	91.6728	84.4264	96.0618	122.184	131.102
YER152C	147.464	140.503	130.068	137.145	127.607	119.58
YER152W-A	0.599765	0.5427	0.322316	0.84757	0.188815	0.345037
YER153C	44.4532	43.3611	50.5657	59.5219	62.7886	56.4744
YER154W	126.744	135.912	144.711	158.253	176.216	165.107
YER155C	117.319	122.422	82.0948	89.5162	110.833	111.178
YER156C	239.016	230.132	175.565	172.418	247.451	242.573
YER157W	48.791	49.1365	42.2323	40.4222	89.7785	90.7438
YER158C	64.5376	65.2232	58.5476	62.9321	75.5166	75.6262
YER158W-A	6.92729	10.8269	2.82027	7.50894	5.28681	6.79291
YER159C	179.466	187.495	228.761	313.38	212.036	263.736
YER160C	45.9232	46.2851	20.9304	22.1106	17.7346	16.9157
YER159C-A	10.5901	16.4671	4.7887	5.85732	2.83222	2.02093
YER161C	80.6386	80.4593	77.4544	81.7141	151.79	175.005
YER162C	12.5517	13.2594	15.5455	18.2204	33.9529	42.7117
YER163C	86.5978	86.8985	143.71	141.112	121.148	126.366
YER164W	65.5904	66.1644	49.0853	53.7604	83.3401	87.445
YER165W	606.394	598.953	255.897	255.737	316.728	306.071
YER165C-A	0.190514	0.172387	0.511914	0.336535	0.199921	0.182667
YER166W	105.712	106.237	86.4035	92.6294	121.488	119.666
YER167W	89.0347	88.1719	84.9417	87.8511	148.733	146.765
YER168C	59.2682	57.3793	69.159	64.684	121.258	121.324
YER170W	46.7466	47.5635	63.8828	71.7669	95.2678	99.3088
YER171W	61.5234	62.1741	64.7757	65.1096	96.3994	100.887
YER172C	47.0813	48.754	44.384	49.4767	70.344	73.2429
YER172C-A	0	0.161528	0.159889	0.78834	0.280992	0.17116
YER173W	21.7093	21.0114	50.3033	49.4832	83.1591	89.6994
YER174C	127.143	126.266	94.319	89.8213	161.485	160.324
YER175C	42.7728	41.1648	108.569	103.39	142.387	144.879
YER175W-A	12.3661	8.5786	45.7806	41.1399	54.9347	57.7027
YER176W	34.3704	33.8427	24.5771	29.7324	57.6213	68.4377
YER177W	898.555	903.919	789.052	801.552	619.489	591.288
YER178W	618.798	610.013	408.723	416.553	312.273	305.304
YER179W	4.66957	4.22528	4.60672	4.96113	6.28499	7.52695
YER180C	44.9193	51.5147	70.1615	75.7619	129.295	135.899
YER180C-A	29.5252	30.294	50.7648	37.9522	66.5308	73.4266
YER181C	3.98844	4.36873	3.1963	3.1519	8.1505	7.24577
YER182W	55.151	57.858	71.0293	73.1483	83.5585	85.441
YER183C	92.3955	95.9902	83.2352	86.3292	129.446	132.782
YER184C	19.1065	21.0817	47.0995	49.3922	90.3296	89.0547
YER185W	6.71184	8.36757	32.9303	36.0298	35.4121	34.7154
YER186C	66.4626	66.5537	94.5185	91.4444	140.264	144.408
YER187W	7.66348	8.95684	9.15197	9.87091	26.555	26.3297
YER188W	15.6809	15.2146	11.3375	12.2646	20.222	20.0617
YER188C-A	17.6835	18.0524	32.2864	41.6496	28.073	30.867
YER189W	7.74136	6.33767	22.1219	21.0006	27.5623	25.3602
YER190W	13.6539	15.416	18.4709	24.6667	23.8189	23.8826
YER190C-A	0	0	0	0	0	0
YER190C-B	2.39384	4.20474	6.30619	6.21859	0.73884	1.08012
YJL091C	122.452	124.964	145.285	149.017	146.814	141.071
YJL026W	560.883	548.546	303.117	296.003	291.852	278.618
YJL026C-A	0	1.10887	0.823213	0.270593	0.64299	1.02812
YJR125C	100.828	100.263	105.551	110.596	133.35	138.848
YJL225C	3.35105	4.76989	6.07215	9.39152	8.76426	8.90995
YJL225W-A	0	0	0	0.124372	0.073884	0.202522
YJL223C	39.5339	41.8758	46.4855	46.9981	93.9829	89.1051
YJL222W-B	0	0.445957	0	0	0.258594	0
YJL222W-A	0	0.269922	0	0.263472	0.469552	0
YJL222W	52.9919	53.4556	78.2106	82.1753	131.585	131.483
YJL221C	6.53236	5.77175	18.7572	18.5305	17.8027	17.9057
YJL220W	0	0.271709	0	0	0.0787769	0
YJL219W	1.7163	2.8893	3.71799	3.13754	2.30367	1.83696
YJL218W	17.1472	18.2231	12.9875	14.1285	13.8276	15.503
YJL217W	339.953	331.523	329.997	312.131	269.826	269.75
YJL216C	5.25876	5.07564	17.5147	17.0306	26.836	26.3126
YJL215C	10.7688	8.20562	39.4273	32.3719	49.0682	53.347
YJL214W	5.92631	4.78661	8.87048	9.76602	13.377	13.4047
YJL213W	48.6883	50.4818	42.4467	51.2659	146.434	162.572
YJL212C	153.965	158.497	196.993	209.024	167.263	160.843
YJL211C	14.246	13.5836	19.2083	27.3298	18.5663	19.0202
YJL210W	108.021	104.908	160.432	170.644	150.922	141.972
YJL209W	40.8772	39.0863	36.2717	36.6543	119.135	123.405
YJL208C	144.065	153.234	134.204	131.551	190.722	194.911
YJL207C	52.4192	55.057	39.9266	42.86	79.2588	80.2717
YJL206C	25.688	26.4331	29.964	31.0251	73.0802	73.0305
YJL205C	308.579	272.001	243.671	253.635	211.252	224.418
YJL204C	25.6903	26.4414	36.1933	37.9525	53.5219	55.9587
YJL203W	38.5651	41.3931	43.6469	47.1736	73.3615	88.9219
YJL202C	1.56353	1.76845	1.92556	2.41667	1.84583	2.15499
YJL201W	61.9677	62.1576	85.8941	82.031	182.038	183.825
YJL200C	144.808	150.402	160.134	158.214	161.264	162.658
YJL199C	23.9191	26.1601	77.6842	89.8318	58.6035	64.2148
YJL198W	95.6711	97.2207	75.9285	79.8684	120.288	120.985
YJL197W	50.2378	51.1135	34.8032	40.1115	78.5944	83.6844
YJL197C-A	0	0	0	0	0.126546	0.115624
YJL196C	145.795	149.469	119.354	122.075	81.9668	80.3792
YJL195C	0.38754	0.526001	2.6901	1.96816	1.72838	1.6721
YJL194W	49.753	53.2407	55.7425	56.0979	181.438	179.967
YJL193W	76.4517	77.0167	87.8748	90.2315	135.424	131.611
YJL192C	339.777	352.842	319.278	308.623	289.841	281.244
YJL191W	919.567	858.786	567.836	538.339	878.456	836.34
YJL190C	1444.89	1415.47	1002.9	941.732	746.227	721.065
YJL189W	1735.21	1731.86	1429.62	1397.05	866.986	838.141
YJL188C	2.6413	0.995827	1.38001	0.777625	0.923908	0.949689
YJL187C	54.6042	53.3115	57.8471	61.6344	105.099	109.972
YJL186W	204.89	196.718	197.04	196.725	214.845	212.504
YJL185C	22.0542	23.7237	59.1911	57.0748	53.6099	53.8257
YJL184W	159.063	156.833	225.167	230.113	201.645	210.098
YJL183W	166.576	162.851	127.98	126.818	196.681	193.015
YJL182C	0.213878	0.774115	0.957827	0.188904	0.44888	0.307604
YJL181W	27.3757	31.7767	33.81	35.3689	92.247	93.3781
YJL180C	71.8382	72.1767	65.8386	61.3	92.134	93.6505
YJL179W	239.283	233.86	298.497	295.443	259.318	265.689
YJL178C	194.121	191.565	186.859	188.607	204.188	216.015
YJL177W	957.579	940.098	659.668	622.796	600.36	599.363
YJL176C	67.5742	67.8255	60.2786	57.9867	99.2237	105.792
YJL175W	0.397739	0.23993	0.356244	0.468394	0.486943	0.444916
YJL174W	343.75	352.219	384.053	377.562	446.955	432.824
YJL173C	193.718	191.965	161.457	149.446	150.19	142.441
YJL172W	391.578	391.9	264.329	271.866	251.781	248.435
YJL171C	299.407	313.033	189.965	191.462	258.281	247.871
YJL170C	16.4096	19.5372	0.38678	0.381407	17.9563	17.2863
YJL169W	2.39613	3.33562	0.495267	0.325591	1.25723	1.14872
YJL168C	48.3383	47.037	53.7803	55.5703	131.302	148.163
YJL167W	449.184	453.808	430.566	420.728	382.369	378.433
YJL166W	467.98	482.62	477.51	475.303	416.712	429.14
YJL165C	69.1787	69.4985	51.69	52.3989	111.755	123.085
YJL164C	57.1905	57.4702	68.8769	67.417	108.403	116.77
YJL163C	15.3723	18.042	32.2484	37.2386	39.9435	42.5754
YJL162C	25.6991	25.8884	44.4366	48.8938	71.7182	76.8623
YJL161W	15.4063	18.3606	99.0615	95.8047	44.0324	43.0543
YJL160C	4.25083	4.27376	3.66635	5.3536	4.79117	4.41539
YJL159W	1613.04	1537.51	2458.93	2452.34	1511.02	1395.89
YJL158C	1372.2	1335.03	1478.68	1500.47	845.194	807.808
YJL157C	101.706	105.187	83.8872	86.6736	229.518	230.465
YJL156W-A	11.6419	14.9697	43.6303	39.7771	18.3252	17.9186
YJL156C	63.8678	63.3005	67.9668	69.4541	121.383	125.409
YJL155C	29.8278	28.7559	53.7009	54.8998	73.5777	79.1757
YJL154C	76.7939	79.3644	72.4567	73.9717	128.193	128.779
YJL153C	8.61842	8.37465	35.4023	36.5604	36.9557	34.0104
YJL152W	2.07819	1.3676	6.09178	6.17402	5.45202	5.5249
YJL151C	446.486	435.388	642.971	643.901	303.242	296.779
YJL150W	16.3861	16.2487	21.7133	22.7994	40.397	39.4931
YJL149W	34.8944	37.9695	52.355	51.9595	104.675	107.508
YJL148W	203.265	204.351	134.158	145.644	190.02	225.13
YJL147C	25.2164	28.1198	39.0743	38.9498	71.4651	71.5118
YJL146W	40.1809	40.2861	61.3066	61.7757	142.111	141.131
YJL145W	128.495	132.333	111.029	106.16	117.542	118.266
YJL144W	23.7507	22.077	90.1196	102.217	90.2911	110.653
YJL143W	484.221	510.658	501.135	608.649	369.578	392.16
YJL142C	30.9781	37.4264	84.7889	84.9867	84.9017	81.4735
YJL141C	50.9539	58.7494	129.752	137.837	131.069	130.72
YJL140W	239.885	233.417	234.158	250.298	237.103	257.274
YJL139C	89.3105	91.5242	95.897	107.447	137.642	141.47
YJL138C	612.406	628.217	417.4	420.349	381.431	360.23
YJL137C	51.5307	53.7349	40.1855	39.0491	81.6437	82.0998
YJL136W-A	3.23873	1.46529	5.80169	3.57569	0.849666	1.94083
YJL136C	1403.81	1402.41	1226.66	1165.93	755.218	768.217
YJL135W	35.5038	38.7057	57.6612	48.5484	84.0528	79.8744
YJL134W	103.126	104.622	110.94	113.159	168.014	165.31
YJL133C-A	113.053	104.485	608.366	614.065	186.201	185.782
YJL133W	191.301	190.878	222.011	222.614	356.935	345.589
YJL132W	18.475	16.6352	41.396	42.0208	53.5685	53.3447
YJL131C	25.6558	24.6513	27.359	30.5686	40.6507	50.2029
YJL130C	311.858	319.63	182.909	194.616	229.303	211.318
YJL129C	85.0534	86.5208	45.9019	51.7931	123.977	128.621
YJL128C	99.597	103.367	102.865	111.074	168.473	173.882
YJL127W-A	0.581311	0.526001	1.56199	2.05373	1.22003	0.557367
YJL127C-B	270.342	282.939	532.169	517.975	403.319	404.396
YJL127C	38.8345	39.2679	51.7627	58.0723	98.4843	102.871
YJL126W	27.2348	28.9728	45.1609	43.7534	60.2876	59.0719
YJL125C	83.7769	90.6571	65.8356	71.0742	125.52	135.547
YJL124C	249.775	254.943	267.381	264.13	286.106	303.254
YJL123C	107.818	110.236	68.6332	86.1987	108.175	131.967
YJL122W	238.948	242.439	196.944	192.274	236.352	244.421
YJL121C	472.963	456.03	245.37	242.8	232.631	218.692
YJL120W	1.46942	1.7095	3.94838	4.07893	4.51582	3.62289
YJL119C	34.8463	30.0113	59.4136	58.5883	52.0971	50.9217
YJL118W	103.154	109.097	174.354	186.586	252.776	235.356
YJL117W	232.96	252.744	140.905	145.622	225.134	224.48
YJL116C	30.9883	35.1409	121.295	126.364	58.5968	56.4656
YJL115W	26.6386	29.2325	32.7071	44.41	52.3394	72.8588
YJL114W	5.99237	5.51258	24.4208	26.9043	23.7382	27.6265
YJL113W	6.4691	6.63495	28.4204	28.4651	36.0162	38.549
YJL112W	39.0958	41.2002	50.8358	52.3421	105.494	111.24
YJL111W	180.711	179.749	121.246	137.441	165.153	186.562
YJL110C	74.4204	73.6201	191.067	189.9	270.209	278.509
YJL109C	132.901	134.732	100.555	100.527	156.037	148.999
YJL108C	21.4903	21.4222	32.6799	33.6338	69.9779	71.0709
YJL107C	24.424	24.5323	44.4323	45.2601	103.532	108.547
YJL106W	6.07137	6.09705	41.9635	42.4964	43.6591	43.1045
YJL105W	2.10142	2.34028	5.57418	6.46046	10.2202	10.1906
YJL104W	291.248	287.333	313.253	318.78	260.904	285.773
YJL103C	23.074	23.8281	33.4605	35.5189	72.352	72.4811
YJL102W	22.367	22.7656	18.2506	22.6123	34.7866	37.4704
YJL101C	153.389	153.719	131.226	132.382	146.966	143.357
YJL100W	36.244	37.2492	49.4289	50.9488	90.0757	88.0397
YJL099W	34.3557	35.5632	39.7148	39.9673	72.8529	74.0873
YJL098W	82.4638	82.0174	59.844	62.3405	136.33	147.317
YJL097W	220.991	222.831	238.455	216.864	153.33	145.132
YJL096W	156.459	160.947	163.45	167.36	214.336	220.191
YJL095W	39.3487	40.2236	28.6947	30.2727	52.9217	51.7492
YJL094C	76.7031	78.1364	75.3922	76.086	109.385	107.891
YJL093C	70.2411	70.6727	108.161	118.146	133.84	135.905
YJL092W	49.0082	49.2861	42.6684	43.456	73.4068	74.9521
YJL090C	38.5854	39.0437	64.4746	68.0549	103.964	106.47
YJL089W	3.3597	3.4602	8.58721	8.99867	23.5757	25.9015
YJL088W	24.5437	25.7787	93.9224	97.8156	66.6348	67.841
YJL087C	44.028	43.2826	34.1375	32.8169	80.4802	84.1665
YJL086C	17.6945	21.6815	16.0136	15.7912	32.7847	34.4616
YJL085W	37.1676	39.8446	48.4544	49.482	75.0892	80.4351
YJL084C	50.041	53.1758	67.9773	69.0794	108.739	107.389
YJL083W	35.262	36.8914	37.4569	38.9886	85.2924	83.4282
YJL082W	69.3142	69.1648	94.9274	98.2317	140.193	137.744
YJL081C	89.6203	91.0154	100.038	93.5808	129.101	134.594
YJL080C	248.53	253.364	117.818	123.565	153.861	148.544
YJL079C	236.082	234.476	439.623	466.756	226.804	224.873
YJL078C	331.867	337.598	235.82	292.707	325.004	311.383
YJL077W-B	36.4112	40.4064	135.373	145.628	100.209	112.639
YJL077C	2.74801	2.17573	11.5375	11.5289	6.48836	8.23383
YJL077W-A	113.356	117.425	189.055	213.358	179.66	167.902
YJL076W	104.935	108.552	83.5103	82.5184	125.541	129.739
YJL075C	0.163102	0.147583	0	0	0	0
YJL074C	37.5519	39.045	34.2941	36.16	52.5288	59.2964
YJL073W	67.5571	69.735	54.2225	61.4974	96.249	99.0966
YJL072C	69.0727	67.3896	95.362	101.055	151.082	156.275
YJL071W	33.7504	34.9274	51.4181	52.7585	98.5553	96.6838
YJL070C	15.2501	16.0374	22.2474	23.6727	48.2235	49.942
YJL069C	87.9411	89.124	68.733	77.9416	125.491	130.278
YJL068C	124.464	124.178	144.104	150.579	107.534	101.839
YJL067W	3.10032	3.85734	1.9091	1.19801	0.610016	0.928945
YJL066C	68.0134	69.9748	112.445	110.725	133.152	132.744
YJL065C	113.356	121.497	255.154	262.575	305.809	308.528
YJL064W	0.687004	2.02032	0.769164	0.606783	0.811044	0.247015
YJL063C	129.956	130.723	129.482	136.732	194.257	200.411
YJL062W-A	376.446	360.904	392.896	391.862	265.155	256.298
YJL062W	92.3759	94.3251	86.3552	89.517	123.119	118.012
YJL061W	75.0941	75.9652	80.9109	80.9648	136.513	140.197
YJL060W	121.558	125.942	135.571	135.982	136.729	139.143
YJL059W	39.2449	44.4387	66.3294	65.408	62.6758	62.2623
YJL058C	32.2563	31.1482	41.3211	41.2624	75.7671	79.7768
YJL057C	24.7414	26.1032	45.7491	47.2419	72.0664	75.3973
YJL056C	38.2656	41.7034	36.7627	37.843	76.7457	73.2678
YJL055W	167.637	164.363	168.308	178.994	176.254	194.222
YJL054W	102.564	110.793	100.979	96.3151	143.216	149.62
YJL053W	58.7063	58.2491	87.4224	78.5673	108.153	105.826
YJL052C-A	0.566778	1.53855	1.52294	1.50179	0.297383	0.271717
YJL052W	231.136	230.398	212.999	209.559	45.9381	43.0177
YJL051W	56.2233	58.0525	51.0239	46.3979	144.406	147.235
YJL050W	113.757	112.082	81.167	89.9955	98.6736	107.867
YJL049W	26.6423	26.2452	53.6689	60.5155	78.5197	94.5887
YJL048C	119.466	126.03	135.288	135.022	143.103	139.842
YJL047C-A	166.255	173.686	104.237	95.6695	84.3246	86.4662
YJL047C	36.6557	34.5064	34.7826	33.3731	70.5958	74.0307
YJL046W	58.6131	60.9918	77.014	72.2324	103.634	110.277
YJL045W	3.99869	3.52131	4.25305	3.78403	3.85895	4.39881
YJL044C	65.2474	65.5645	102.193	104.962	117.295	122.965
YJL043W	2.98767	2.86242	4.32878	4.03581	11.1115	8.97296
YJL042W	95.5947	96.9541	63.6756	72.4666	81.2521	79.9262
YJL041W	103.011	104.164	99.78	103.473	115.157	117.339
YJL039C	94.3059	95.1759	78.8844	80.7732	139.41	136.813
YJL038C	4.32812	4.00956	4.89188	4.73291	3.46046	4.14985
YJL037W	2.21673	2.46169	5.32467	5.60668	3.48929	3.04322
YJL036W	58.2819	58.8327	73.7527	75.9867	112.669	121.99
YJL035C	46.9681	46.3405	41.1782	43.6376	46.0647	52.2215
YJL034W	581.582	564.812	380.758	387.636	474.193	469.819
YJL033W	97.8592	96.8231	71.795	74.6155	109.172	115.65
YJL032W	0.647746	0.390744	0.19339	0	0.113289	0.207022
YJL031C	51.7703	50.4095	43.8311	44.26	71.8071	75.6499
YJL030W	59.6124	60.5008	48.961	52.9565	81.4558	93.8456
YJL029C	70.4375	70.341	63.4098	64.1834	126.021	125.987
YJL028W	1.82179	4.21271	1.63173	2.50298	0.743457	1.74675
YJL027C	0.978609	1.47583	4.82083	2.88113	4.6212	3.20586
YJL025W	39.4433	45.2504	64.2298	68.0811	116.251	117.761
YJL024C	125.331	129.817	173.694	183.398	168.975	175.515
YJL023C	18.1108	18.7456	33.6682	38.7818	60.2628	60.9957
YJL022W	1.76086	2.98748	19.3202	20.9959	12.7037	13.5067
YJL020C	143.584	136.991	107.474	118.794	114.587	121.902
YJL020W-A	0.527235	0.477071	0.708346	0.465671	0.138318	0.379139
YJL019W	51.8481	52.1711	49.5013	52.7422	86.5415	87.4108
YJL016W	87.0539	86.6919	96.2906	99.086	127.314	122.92
YJL015C	4.29558	5.39843	1.92372	2.31855	1.50257	0.800849
YJL014W	246.077	243.446	183.588	186.091	214.761	221.619
YJL013C	32.0735	28.982	54.7394	53.2417	75.9595	82.0415
YJL012C	300.848	300.863	86.8205	87.7777	157.489	161.148
YJL011C	64.7946	60.4025	70.3187	74.0388	92.0052	101.709
YJL010C	100.44	99.3716	68.5896	69.9184	102.296	106.862
YJL009W	1.87193	2.44663	0.558879	1.10223	0.545657	1.09684
YJL008C	196.709	194.721	148.315	153.68	190.639	190.517
YJL007C	0.431831	0.781487	0.773559	1.33492	0.679733	0.414044
YJL006C	37.0155	37.989	42.0533	40.6657	86.3512	89.3645
YJL005W	56.2248	57.0082	62.6509	65.7122	77.1523	76.3166
YJL004C	119.579	116.85	200.77	191.993	208.11	208.423
YJL003W	52.9628	56.7153	85.1484	82.4511	80.6683	86.1273
YJL002C	405.228	402.884	315.615	317.905	314.989	303.388
YJL001W	319.915	315.498	262.849	269.21	323.597	324.047
YJR001W	146.629	156.594	141.502	173.972	124.871	135.579
YJR002W	116.142	121.323	92.2655	104.94	115.489	127.789
YJR003C	71.4576	71.2863	72.1641	66.9259	133.845	137.907
YJR004C	42.3473	41.2487	320.622	332.162	145.101	134.214
YJR005W	53.6539	54.4017	74.8799	71.6688	126.487	127.742
YJR005C-A	0.482364	1.09117	3.88837	4.04737	4.93529	4.16247
YJR006W	70.6614	71.673	110.143	114.275	126.144	129.667
YJR007W	398.64	412.635	352.99	333.184	367.78	353.214
YJR008W	24.2093	24.0238	87.1538	88.3648	78.8109	83.1661
YJR009C	1666.97	1624.74	1244.64	1243.28	701.288	666.187
YJR010W	81.2972	84.7006	99.15	100.784	116.305	119.131
YJR010C-A	118.128	126.971	111.362	111.501	185.817	175.271
YJR011C	16.8735	19.3396	22.166	19.5653	41.3158	41.6079
YJR012C	35.5326	38.957	44.224	48.1343	59.9913	65.1075
YJR013W	102.02	103.383	115.754	121.233	153.756	152.888
YJR014W	239.471	238.849	231.222	219.96	199.65	214.533
YJR015W	332.17	328.024	283.011	290.561	310.303	299.984
YJR016C	620.864	620.602	636.587	642.301	572.011	546.048
YJR017C	219.154	227.334	199.616	191.222	192.969	191.377
YJR018W	7.68195	7.79873	5.53798	5.46105	4.12895	3.14383
YJR019C	58.2972	58.9046	79.5992	81.6973	94.9586	91.7936
YJR020W	11.0292	11.4583	28.1722	28.5024	9.64485	9.39992
YJR021C	29.6524	32.562	81.0948	80.6675	138.137	141.293
YJR022W	54.4107	52.9635	93.4073	84.4642	151.287	160.263
YJR023C	11.8431	12.7065	12.1229	14.6443	11.8065	10.7876
YJR024C	232.356	231.097	233.394	232.358	221.641	208.235
YJR025C	262.246	267.95	189.484	182.914	118.084	116.441
YJR027W	142.792	185.795	66.6071	79.8901	56.1979	49.9488
YJR026W	106.981	159.461	34.8562	50.491	30.8577	22.3042
YJR029W	158.362	161.788	89.3415	92.7756	60.4588	57.9022
YJR028W	259.664	260.821	131.045	133.946	80.5969	76.6475
YJR030C	32.7911	32.0085	40.1763	44.1545	77.7182	75.0899
YJR031C	42.6069	44.3185	37.0954	41.483	73.2883	74.0982
YJR032W	86.1963	88.7206	79.8837	77.8592	111.556	119.555
YJR033C	29.9833	31.1638	41.6287	42.923	68.8842	66.2764
YJR034W	75.917	67.1882	100.226	94.6081	78.5746	86.1516
YJR035W	19.331	18.644	27.8038	32.7831	43.2657	48.1584
YJR036C	7.21008	6.70784	14.0982	18.23	29.8116	33.4579
YJR037W	0	0.320532	0.15864	0.156436	0.185864	0.424557
YJR038C	2.06101	1.3563	2.18163	2.97875	5.60358	6.01818
YJR039W	15.2353	16.1077	29.9341	34.194	64.6715	66.4906
YJR040W	62.4909	62.5678	50.4524	51.3432	75.3218	73.1266
YJR041C	74.4963	75.0552	62.3522	62.8493	107.746	108.927
YJR042W	85.4808	88.0589	74.1371	90.2283	111.369	123.144
YJR043C	66.0111	67.2697	72.7195	70.4543	94.0103	98.654
YJR044C	368.687	391.076	368.675	381.305	291.478	285.9
YJR045C	606.271	618.428	437.647	477.179	432.499	437.02
YJR046W	73.8966	74.7661	95.2197	95.7504	120.683	117.004
YJR047C	15.7837	14.4118	11.0526	10.2654	3.68905	3.85218
YJR048W	585.739	604.418	400.211	399.203	555.511	554.697
YJR049C	45.513	46.1276	60.8795	62.4095	61.784	63.9634
YJR050W	63.018	57.3698	71.501	65.5866	117.794	120.983
YJR051W	69.1876	71.9626	56.4683	62.5047	64.9503	70.0184
YJR052W	31.363	29.2126	35.3022	38.8802	63.6379	68.438
YJR053W	23.5385	24.046	21.6126	22.9491	68.9929	69.2003
YJR054W	63.4154	63.1898	45.3418	45.9986	117.472	118.77
YJR055W	30.0908	37.9199	38.3967	42.1108	59.2603	66.1342
YJR056C	75.1878	79.8057	111.64	110.934	208.494	222.143
YJR057W	95.9082	100.68	119.496	117.098	136.056	141.142
YJR058C	107.075	123.777	142.416	170.473	134.787	153.63
YJR059W	60.0411	63.4958	78.3477	81.489	78.0676	81.787
YJR060W	94.4201	94.2947	95.8763	103.646	185.256	201.225
YJR061W	12.6435	12.6898	11.1943	12.9428	25.7478	26.9859
YJR062C	54.4008	56.7495	93.1501	97.2774	123.317	124.468
YJR063W	326.212	336.528	409.019	405.721	371.587	361.857
YJR064W	228.443	221.974	142.25	143.119	176.444	177.663
YJR065C	230.288	228.435	242.588	248.029	237.88	235.029
YJR066W	43.8559	45.2787	30.7835	35.137	63.1208	62.2298
YJR067C	66.7361	70.0656	89.0887	95.1838	78.241	93.2256
YJR068W	109.961	108.191	96.5392	96.8385	140.728	140.709
YJR069C	163.85	164.63	137.424	146.538	156.562	164.238
YJR070C	298.897	288.833	201.689	197.843	255.311	253.547
YJR071W	0.737272	0.667123	1.65089	1.79075	1.54736	1.32545
YJR072C	114.413	109.851	105.686	102.972	122.682	136.45
YJR073C	166.474	160.842	427.798	445.555	263.823	264.943
YJR074W	98.8626	94.9828	136.671	132.578	138.67	133.302
YJR075W	191.02	190.362	134.009	135.073	155.388	152.189
YJR076C	136.735	141.724	108.803	115.811	171.653	184.062
YJR077C	548.685	547.896	302.246	318.777	311.108	301.605
YJR078W	27.3152	29.5059	19.0536	21.347	25.0745	24.7059
YJR079W	21.2284	28.3467	24.7363	23.4825	24.5476	23.417
YJR080C	76.7948	83.0949	94.8981	95.861	99.7099	103.459
YJR082C	169.039	172.03	267.54	261.013	244.584	250.456
YJR083C	34.5917	33.8813	52.9264	52.4496	95.1242	98.5893
YJR084W	39.4071	39.0928	50.669	53.3182	81.7523	84.9499
YJR085C	439.092	456.341	355.162	367.419	317.695	300.836
YJR086W	80.0638	79.284	101.347	93.4446	107.487	102.224
YJR087W	37.3977	40.3268	44.6036	39.7054	48.293	41.1523
YJR088C	137.806	141.078	126.756	133.128	163.084	164.439
YJR089W	24.689	27.0227	23.8993	27.8447	57.3466	65.5079
YJR090C	59.9446	62.5928	48.2442	50.8939	112.84	115.923
YJR091C	116.428	118.407	116.462	123.755	180.99	180.259
YJR092W	40.8957	43.819	38.1998	39.0382	65.605	70.7664
YJR093C	68.7737	69.9229	88.3432	90.0463	134.33	145.037
YJR094C	14.821	18.0137	16.9872	18.5262	30.5456	30.3178
YJR094W-A	1097.48	1117.91	1150.01	1098.3	724.08	696.179
YJR095W	1.75473	2.34991	7.85833	7.87315	9.53835	8.64782
YJR096W	44.9417	44.0726	74.4072	74.0812	84.8225	85.5283
YJR097W	59.6263	65.4552	110.333	100.003	165.572	174.401
YJR098C	16.3218	17.4853	19.3787	19.5057	46.1509	48.7849
YJR099W	90.3975	97.6365	99.045	105.02	104.348	103.367
YJR100C	51.7012	54.4748	84.5668	85.5897	120.694	123.73
YJR101W	131.951	136.53	141.305	140.017	172.994	171.334
YJR102C	63.8812	63.3611	79.9233	78.6158	101.667	102.422
YJR103W	101.687	102.18	123.8	127.959	116.262	109.926
YJR104C	916.937	926.176	997.087	958.173	547.185	525.973
YJR105W	695.691	683.942	508.184	509.463	337.778	318.825
YJR106W	49.152	56.6255	63.7707	70.4144	78.3846	77.3232
YJR107W	62.7763	64.4727	72.7681	84.5384	85.1473	85.8261
YJR108W	18.466	21.0104	59.444	54.0967	65.9039	67.5785
YJR109C	136.553	143.397	254.958	270.474	214.647	207.563
YJR110W	19.611	21.7348	31.7704	36.473	55.7992	56.9146
YJR111C	80.227	85.74	118.976	117.605	209.383	201.147
YJR112W	41.4141	44.3794	60.1136	58.7829	110.709	115.789
YJR112W-A	87.593	97.535	184.599	199.51	142.528	152.26
YJR113C	144.803	147.403	152.54	143.397	248.507	220.222
YJR114W	2.42287	3.28851	4.80522	5.19703	2.1793	2.15714
YJR115W	33.8733	38.6147	84.9266	102.357	79.8386	75.697
YJR116W	123.72	127.187	131.989	143.671	127.832	123.32
YJR117W	309.456	323.254	295.465	295.771	320.545	311.528
YJR118C	162.254	170.246	139.255	123.284	180.587	175.124
YJR119C	16.9178	17.0247	25.1248	25.3526	48.2829	47.3361
YJR120W	167.999	162.184	147.348	144.959	108.481	111.195
YJR121W	932.704	940.521	768.294	774.594	670.273	643.225
YJR122W	49.3484	51.2027	60.0615	61.8407	93.7055	94.6316
YJR123W	1787.31	1785.54	1306.41	1243.52	966.942	926.722
YJR124C	122.444	120.617	108.313	115.059	195.703	193.748
YJR126C	76.1939	73.5423	50.9649	54.9423	82.1099	84.0046
YJR127C	47.854	51.5302	83.6645	94.3774	87.8755	84.5882
YJR128W	3.77852	4.44471	19.4598	19.0227	11.3006	10.6875
YJR129C	42.675	42.8381	36.1923	39.2232	65.8091	66.6185
YJR130C	31.1019	31.5083	69.1988	72.7429	77.7842	82.3471
YJR131W	58.6976	61.02	69.7416	76.3455	94.4056	97.4622
YJR132W	82.4286	82.8775	64.286	65.9126	132.822	131.367
YJR133W	110.225	108.529	123.963	114.708	134.36	126.18
YJR134C	46.431	43.7227	48.7572	48.0516	74.1441	83.6948
YJR135C	25.3161	30.6001	48.0574	49.0584	58.4853	63.3099
YJR135W-A	169.26	176.234	208.597	195.005	126.523	130.424
YJR136C	31.3205	32.3752	50.6686	48.731	97.6713	99.5435
YJR137C	98.5086	98.675	60.9741	66.4548	92.7637	90.8584
YJR138W	30.0374	29.6127	29.1585	32.114	65.7657	66.7343
YJR139C	456.886	454.386	361.333	341.351	213.785	206.776
YJR140C	29.2291	29.2969	28.8888	29.1797	57.7958	60.5323
YJR140W-A	1.81369	0.410281	0.812237	0.400477	0.475813	0.217373
YJR141W	22.4105	22.7541	18.9055	20.7719	46.1456	48.8777
YJR142W	75.5484	70.0348	75.7772	85.0576	95.336	100.638
YJR143C	354.151	353.551	225.548	227.243	212.588	208.826
YJR144W	124.271	132.961	97.6941	101.232	126.443	139.441
YJR145C	1114.52	1073.93	790.691	748.296	629.135	607.235
YJR146W	52.451	52.8497	67.457	68.7259	39.4158	36.7508
YJR147W	231.132	229.483	165.502	181.163	122.929	116.346
YJR148W	309.879	306.35	276.096	274.491	199.538	196.818
YJR149W	24.5744	25.7818	39.2581	41.3332	63.941	64.5679
YJR150C	0.530762	0.548871	0.47539	0.535755	0.159135	0.10905
YJR151C	10.4966	12.3225	34.8276	43.4941	55.5558	48.0859
YJR151W-A	0	0	0	0	0	0
YJR152W	15.8781	16.2151	52.3326	50.7958	99.5796	99.636
YJR153W	5.13545	5.44019	25.1861	27.8785	12.8811	12.2798
YJR154W	12.4789	13.1243	57.4067	61.6296	75.4856	80.3091
YJR155W	24.1616	25.1279	94.7142	98.5949	103.518	108.198
YJR156C	4.38796	4.51189	17.6263	17.9099	11.8953	11.8886
YJR157W	0.187365	0.847688	0.503453	0.827432	0.884776	0.538942
YJR158W	0.0399139	0.0722325	0.143	0.282026	0.125655	0.11481
YJR159W	15.8318	16.331	29.4379	28.5256	50.8043	50.093
YJR160C	1.72947	1.93914	2.52561	2.25808	2.26859	2.18094
YJR161C	99.5994	98.0828	162.236	153.985	122.825	121.82
YJR162C	0.19377	0	1.56199	0.513432	0.305008	0.557367
YBL047C	266.361	262.467	165.709	179.142	203.968	196.65
YBR012W-B	132.62	138.66	57.0808	61.0744	54.8999	53.2979
YBR078W	1149.11	1167.44	841.185	864.611	711.949	695.493
YBR140C	62.6479	64.739	68.0278	72.877	107.646	100.77
YBL113C	27.4741	29.6199	39.1011	56.1829	64.0067	71.4481
YBL113W-A	3.09792	5.47891	5.54945	5.34798	0.221652	0.337536
YBL112C	26.7348	32.8999	48.6576	66.4943	80.574	97.7154
YBL111C	23.825	26.1953	43.4389	53.7167	57.7493	62.2507
YBL109W	9.51377	8.24225	11.966	15.1967	6.69112	5.91954
YBL108C-A	1.05447	1.90828	3.30562	2.79403	2.48972	1.01104
YBL108W	0.222266	0.804472	0.199078	1.37419	0.583104	0.106555
YBL107W-A	1.94324	1.75835	2.32068	2.28844	0.339866	0.931599
YBL107C	94.3671	98.8215	81.3268	89.9549	107.299	128.162
YBL106C	17.8723	20.1894	22.6157	26.8371	40.6629	39.9593
YBL105C	68.5447	70.3746	61.3937	72.0824	107.533	114.602
YBL104C	30.5045	32.7948	30.84	32.9555	60.5184	59.1343
YBL103C	51.6268	50.8428	94.9	100.859	178.308	184.611
YBL102W	219.889	222.9	316.528	313.429	252.72	249.426
YBL101C	38.8532	42.2575	36.2165	39.0626	80.6286	85.4522
YBL100W-C	2.26711	3.58996	8.63002	10.0119	6.54243	5.97776
YBL100W-B	98.4549	102.721	83.8035	86.167	74.7571	75.0926
YBL100W-A	100.806	99.8599	65.9596	66.2292	41.891	41.8901
YBL100C	0	0	0.38678	0.190703	0.453155	0
YBL099W	440.509	441.616	342.895	337.178	321.696	308.184
YBL098W	38.7032	39.7821	18.5	20.5885	32.4863	33.8319
YBL097W	18.9176	22.6605	10.3009	18.6182	42.0984	59.6553
YBL096C	1.54076	2.38999	7.8858	7.38744	8.19969	8.86376
YBL095W	66.3402	68.8848	58.4451	63.3227	120.489	118.232
YBL094C	3.06366	3.14179	12.2567	13.5296	12.0025	10.6728
YBL093C	148.132	152.045	120.825	116.066	142.582	158.555
YBL092W	1581.27	1552.49	1041.96	972.914	799.801	781.631
YBL091C-A	24.4745	24.9432	40.3811	48.1255	44.9454	49.897
YBL091C	154.991	162.411	135.982	154.829	122.589	137.352
YBL090W	103.803	106.95	135.981	130.717	116.414	123.28
YBL089W	63.3313	67.518	95.3937	98.4651	136.331	135.268
YBL088C	20.2397	21.3602	33.1246	34.1152	60.2659	58.2963
YBL087C	1121.4	1116.38	857.116	808.499	635.02	614.788
YBL086C	40.8274	41.0281	54.0042	55.5694	95.4427	104.172
YBL085W	93.2959	92.2818	80.0232	86.3005	142.016	148.993
YBL084C	31.871	34.4063	38.2308	41.0502	100.664	109.317
YBL083C	165.882	163.534	153.867	164.844	199.791	193.493
YBL082C	131.828	126.392	128.472	137.898	165.861	162.272
YBL081W	339.084	349.461	241.69	304.699	471.751	474.127
YBL080C	20.7052	22.7471	28.2485	28.2624	44.5087	45.5601
YBL079W	110.852	111.401	105.096	107.806	162.68	160.268
YBL078C	59.7518	57.8913	154.876	152.215	135.082	136.964
YBL077W	0.472315	0	0.282027	0	0	0
YBL076C	340.278	335.662	281.785	274.344	262.54	256.614
YBL075C	26.8914	28.2463	66.7909	72.6712	92.6737	100.025
YBL074C	17.3854	19.0158	45.7454	51.6345	75.415	78.3704
YBL073W	0.653975	0.19725	1.1715	0.770148	0.457512	0.313519
YBL072C	1543.22	1527.63	999.84	933.052	768.284	747.504
YBL071C-B	116.791	116.868	96.607	100.726	99.4881	107.04
YBL071W-A	175.087	163.371	393.886	369.838	327.91	336.798
YBL071C	2.42119	2.58915	5.52006	6.221	2.30977	0.633126
YBL070C	0.423759	0.19172	0.948875	1.12283	1.5564	2.03153
YBL069W	83.1977	85.0617	56.9038	61.3754	108.303	107.853
YBL068W-A	126.556	131.134	79.4245	86.1786	158.554	151.198
YBL068W	125.627	127.476	116.806	124.981	160.459	158.244
YBL067C	101.687	103.475	53.8324	56.6182	123.295	125.135
YBL066C	47.2759	50.0086	50.2788	58.0848	119.699	115.942
YBL065W	1.77426	1.0703	4.59091	3.48241	2.89625	2.07922
YBL064C	60.6582	58.9583	128.888	121.289	104.016	104.829
YBL063W	18.9198	21.3626	15.0103	16.6205	46.3618	51.8998
YBL062W	0.714051	0.161528	0.159889	0.157668	0.561984	0.77022
YBL061C	95.3683	95.3888	81.5733	86.1571	135.456	144.723
YBL060W	22.5723	24.3604	51.7683	58.4417	75.4869	84.2163
YBL059C-A	183.43	186.491	235.364	220.08	223.956	237.134
YBL059W	58.4307	65.8776	84.7825	88.8687	80.7533	85.5487
YBL058W	156.292	150.033	164.603	169.258	180.001	185.382
YBL057C	163.471	171.179	159.338	153.101	169.722	168.75
YBL056W	165.175	161.925	156.299	153.189	187.231	189.425
YBL055C	79.376	78.8738	54.8599	56.8696	84.3177	86.6121
YBL054W	141.759	145.938	97.1673	110.893	160.971	164.766
YBL053W	4.53422	7.22094	4.71098	4.80572	4.09199	5.9995
YBL052C	33.3527	33.0394	30.1416	35.3546	56.131	67.9291
YBL051C	136.637	138.324	145.753	163.363	235.933	247.039
YBL050W	129.605	129.456	139.785	152.673	153.908	164.625
YBL049W	13.8636	14.4631	75.8185	76.638	17.3723	15.0128
YBL048W	6.10376	6.50926	39.0499	37.1596	8.3496	7.52446
YBL046W	39.1359	40.6104	33.9504	45.031	67.039	85.1051
YBL045C	277.449	272.326	251.031	255.501	265.697	261.821
YBL044W	1.65886	2.16815	2.64142	2.93032	2.70788	3.18107
YBL043W	52.6357	56.2148	96.4138	94.8416	106.505	105.106
YBL042C	209.495	210.622	215.592	219.574	286.25	280.734
YBL041W	193.36	201.495	202.304	192.212	244.641	269.651
YBL040C	226.608	224.349	274.222	268.957	303.547	294.294
YBL039W-B	38.9188	41.37	86.6386	81.0966	101.705	107.056
YBL039C	286.829	295.579	213.002	216.016	242.172	243.214
YBL039C-A	1392.65	1410.34	1061.71	1087.72	1197.18	1211.86
YBL038W	126.199	119.298	157.306	158.988	175.162	173.479
YBL037W	43.9943	44.3471	46.5295	48.5178	82.4557	81.176
YBL036C	130.93	128.173	98.6963	114.012	123.84	141.756
YBL035C	41.2319	42.016	47.5722	51.9599	84.5646	87.9653
YBL034C	28.3763	29.511	20.0243	22.4177	58.4159	61.1703
YBL033C	87.0152	87.9851	108.161	112.909	150.135	152.538
YBL032W	178.283	175.873	133.955	141.425	186.339	186.133
YBL031W	39.3902	37.6393	38.5753	37.6259	93.4432	97.5615
YBL030C	755.609	777.283	584.989	619.421	457.019	449.124
YBL029C-A	176.357	167.999	245.167	230.801	223.256	235.335
YBL029W	24.4752	26.8805	29.6779	31.4433	73.7068	74.5527
YBL028C	315.065	317.68	320.53	297.738	307.055	319.356
YBL027W	1316.36	1295.19	927.447	867.349	708.46	706.863
YBL026W	275.123	273.093	268.631	239.66	274.088	279.868
YBL025W	61.8021	62.1042	92.2112	98.4734	185.681	187.745
YBL024W	178.854	180.134	139.118	138.705	190.395	193.081
YBL023C	55.856	58.0484	53.9778	60.855	83.7737	86.8242
YBL022C	93.2035	93.7423	79.9165	80.9253	129.097	130.117
YBL021C	58.4758	58.0052	92.7071	93.0764	135.771	150.437
YBL020W	136.539	136.998	86.1325	86.4682	184.533	178.889
YBL019W	22.8452	22.0103	40.3001	40.432	73.1756	73.0349
YBL018C	102.697	106.244	128.049	125.224	104.04	109.66
YBL017C	112.581	115.489	97.0186	106.874	125.27	125.609
YBL016W	150.692	153.913	194.742	188.869	237.033	239.203
YBL015W	55.4948	56.0536	62.3434	60.2995	89.8356	84.0207
YBL014C	47.8247	47.9043	38.8649	40.7189	93.993	97.0772
YBL013W	15.96	16.5847	23.7913	24.1581	31.4841	30.4701
YBL012C	0.338375	0.30618	0.606147	0.448295	0.798939	0.729985
YBL011W	107.479	108.185	83.0406	81.0175	114.837	110.517
YBL010C	37.5163	38.1809	76.9602	75.4635	100.539	111.239
YBL009W	54.6853	59.9665	42.7114	43.6561	77.4865	79.6446
YBL008W-A	7.93489	8.97489	4.31501	6.50775	9.96233	12.9065
YBL008W	41.9995	42.0282	35.3	36.2858	67.5388	70.3297
YBL007C	181.988	172.301	128.425	134.94	143.642	138.927
YBL006C	181.87	184.513	254.553	232.985	284.699	287.149
YBL006W-A	7.70818	11.0776	12.1836	11.2134	9.27835	9.34705
YBL005W	32.3243	34.771	37.1617	39.6993	53.6933	52.8971
YBL005W-B	319.771	336.192	141.714	148.856	112.47	107.3
YBL005W-A	699.669	693.291	311.127	315.069	218.297	212.765
YBL004W	127.845	132.338	78.9765	80.8983	131.688	127.792
YBL003C	521.095	534.445	393.752	391.143	314.197	341.341
YBL002W	1030.16	1047.46	1131.75	1095.09	890.166	874.186
YBL001C	261.474	269.222	288.151	282.432	164.835	175.451
YBR001C	36.5757	40.424	52.8578	58.4307	63.0863	66.4505
YBR002C	124.178	125.157	117.166	125.655	211.422	224.493
YBR003W	96.8066	94.0443	89.1062	90.8677	148.089	149.57
YBR004C	115.759	120.437	130.538	129.232	157.928	151.56
YBR005W	108.376	113.115	148.973	151.863	143.856	144.441
YBR006W	27.2691	30.0708	54.0676	55.3671	52.6929	52.3136
YBR007C	43.9887	44.8693	48.3816	51.4588	100.795	102.891
YBR008C	45.7139	49.697	99.9022	107.487	112.713	106.667
YBR009C	1142.49	1162.4	1078.56	1088.03	915.596	938.885
YBR010W	553.374	556.425	563.527	513.604	437.522	432.763
YBR011C	993.514	986.312	583.02	560.807	481.76	468.258
YBR012C	0	0	0	0	0.169933	0.0776333
YBR012W-A	157.156	184.487	60.5034	69.0618	62.2818	58.1141
YBR013C	0.174393	0.1578	0.312399	0	0.36601	0.0836051
YBR014C	145.918	149.431	159.66	159.504	159.945	168.464
YBR015C	287.787	279.718	162.651	166.888	246.161	240.419
YBR016W	329.522	339.197	332.136	365.552	335.835	358.16
YBR017C	132.992	134.245	128.818	132.802	188.293	189.273
YBR018C	1.11193	1.6769	5.92026	4.85592	10.3719	10.4244
YBR019C	2.26711	2.46169	6.1788	6.97974	4.99603	4.8909
YBR020W	5.14279	5.7005	13.8956	18.8504	23.5433	22.0455
YBR021W	66.9048	70.8285	88.9746	98.9507	133.982	140.47
YBR022W	70.4333	74.1041	99.4762	98.5443	102.179	105.084
YBR023C	141.665	144.302	159.504	168.056	186.224	179.258
YBR024W	28.9019	30.0918	34.9639	35.4727	42.3032	47.3614
YBR025C	532.513	535.287	403.034	395.56	352.011	357.07
YBR026C	102.228	98.8012	114.374	116.096	106.964	107.032
YBR027C	23.4881	23.1014	23.05	23.9925	26.6841	27.5144
YBR028C	86.4606	86.3072	88.0953	90.5261	145.096	150.281
YBR029C	161.272	162.948	183.906	185.898	222.167	210.918
YBR030W	49.1549	48.0763	79.0573	78.8643	124.46	126.198
YBR031W	644.784	621.468	463.009	459.335	331.627	319.233
YBR032W	0.897866	1.01555	0.201049	0.198256	0.588877	0.645663
YBR033W	3.59781	3.63455	17.4366	17.7385	9.78778	10.5142
YBR034C	263.674	259.218	205.736	193.526	281.807	277.634
YBR035C	165.43	165.904	180.448	180.302	144.146	145.754
YBR036C	284.299	278.063	304.095	314.145	289.453	280.523
YBR037C	67.0943	72.908	98.5798	102.555	134.506	131.672
YBR038W	95.5762	101.549	74.8202	89.8581	106.108	103.297
YBR039W	275.469	283.909	237.098	231.173	241.185	240.086
YBR040W	15.5437	35.4708	20.4418	26.5199	20.3295	14.3583
YBR041W	123.947	126.422	92.4677	97.1904	129.623	129.694
YBR042C	74.9628	72.5208	42.5506	41.0036	97.6731	99.1014
YBR043C	44.7508	45.339	208.003	211.992	186.739	188.28
YBR044C	47.5183	47.7945	53.972	54.4453	91.8825	95.3521
YBR045C	11.0876	10.7058	12.1201	11.545	20.2406	21.2618
YBR046C	34.4466	33.986	43.8244	47.6986	45.3442	51.034
YBR047W	13.0101	9.32457	27.6899	25.4849	26.5617	26.8011
YBR048W	1529.94	1505.1	1096	1050.93	844.568	808.365
YBR049C	86.3236	88.2281	65.9505	73.9722	108.085	114.154
YBR050C	3.81196	4.59902	11.4408	10.9865	12.4918	12.8564
YBR051W	1.55016	1.22734	5.90087	6.50347	2.03339	2.87973
YBR052C	159.987	160.807	187.661	177.652	120.024	126.252
YBR053C	67.887	74.2848	103.736	109.824	101.558	104.842
YBR054W	228.354	236.239	199.351	196.814	188.291	182.215
YBR055C	50.1787	47.8661	59.1805	60.9392	97.8853	102.045
YBR056W	61.3294	60.6022	86.3204	86.5174	78.22	80.3675
YBR056W-A	104.219	112.368	148.809	172.145	176.477	176.17
YBR056C-B	9.83841	7.35409	19.5397	17.3792	15.9352	15.1751
YBR057C	59.7356	59.5858	78.3466	79.6043	141.901	149.377
YBR058C	72.7389	76.9932	84.3917	85.2678	113.933	111.981
YBR058C-A	294.725	294.794	270.244	275.884	221.899	226.632
YBR059C	73.0014	76.8213	76.7011	84.5913	104.762	107.844
YBR060C	53.7755	55.3978	53.0374	51.3655	86.4278	91.1147
YBR061C	88.5704	90.3673	111.976	107.008	144.197	151.637
YBR062C	55.2374	54.2885	68.4343	69.5856	77.2867	82.5658
YBR063C	29.3885	27.8586	59.8147	59.5771	81.5343	84.051
YBR064W	0	0.28691	0.851997	0.140027	0.499104	0.608037
YBR065C	49.3174	51.1446	109.652	108.897	131.305	136.677
YBR066C	59.9092	61.1708	69.1872	70.4912	129.072	137.85
YBR067C	582.465	567.393	671.539	693.527	372.25	366.701
YBR068C	499.805	484.804	713.404	728.704	589.637	575.594
YBR069C	248.468	241.139	250.287	251.525	252.833	245.842
YBR070C	66.4892	67.4895	86.5988	82.9559	93.1134	91.4703
YBR071W	180.406	185.401	375.755	370.063	462.29	452.946
YBR072W	18.1369	18.7966	73.0069	73.3897	30.6512	33.8698
YBR072C-A	9.23638	9.49724	7.14468	5.56218	4.40567	6.23942
YBR073W	89.9753	90.9763	107.141	107.177	121.012	124.349
YBR074W	137.442	138.727	118.469	122.562	162.249	159.659
YBR076W	1.5327	1.32908	2.11639	1.52294	2.04398	1.65326
YBR076C-A	141.631	151.435	242.074	226.787	226.412	222.746
YBR077C	118.641	121.322	219.877	218.542	265.93	267.982
YBR079C	230.682	229.566	163.815	166.478	197.327	205.851
YBR080C	105.141	103.489	93.7711	103.021	137.337	138.758
YBR081C	42.4169	42.4439	35.006	40.979	74.3792	85.4164
YBR082C	1069.65	1055.72	1057.68	1012.88	756.031	763.797
YBR083W	93.0121	97.2627	162.03	163.028	208.229	216.19
YBR084W	201.415	199.255	126.413	134.689	178.405	177.484
YBR084C-A	1337.72	1330.39	900.728	846.376	771.255	780.599
YBR085W	17.2242	17.317	11.8012	13.9777	16.723	18.2791
YBR085C-A	427.588	438.428	806.57	803.515	463.364	458.506
YBR086C	413.491	400.641	203.552	203.326	300.561	295.015
YBR087W	84.1705	91.3019	77.1053	78.6289	125.789	125.862
YBR088C	164.387	160.469	195.219	177.431	220.546	216.114
YBR089W	0.793489	0.615421	3.45201	2.90346	0.535289	0.760806
YBR089C-A	404.453	421.974	427.846	434.918	410.27	413.661
YBR090C	280.716	289.865	314.329	308.986	301.155	304.411
YBR091C	78.3184	84.2941	116.298	123.42	127.929	133.19
YBR092C	273.168	277.071	323.984	329.495	335.763	325.084
YBR093C	189.749	193.7	25.3824	28.2388	91.6041	90.038
YBR094W	57.3393	57.5699	49.2028	52.1576	103.54	102.632
YBR095C	50.3393	48.4055	60.8707	59.4211	103.58	105.812
YBR096W	237.605	230.095	286.393	279.12	220.45	213.468
YBR097W	23.8241	24.2785	21.3387	22.2808	57.3918	57.152
YBR098W	13.7272	13.2511	26.6442	27.2868	49.9707	52.0973
YBR099C	7.08472	6.41064	6.98016	7.50894	26.6715	27.5962
YBR101C	161.58	165.029	184.986	184.068	243.057	244.638
YBR102C	36.9533	38.1986	48.3141	48.1475	76.6096	77.7816
YBR103W	43.0159	44.2047	51.03	53.646	71.7936	78.9397
YBR103C-A	1.88926	2.13688	5.07648	9.1776	2.23037	1.81144
YBR104W	91.1654	91.0699	62.2715	63.7729	113.726	120.971
YBR105C	149.267	146.763	234.553	242.824	249.277	243.692
YBR106W	582.132	597.512	296.101	279.592	369.573	360.506
YBR107C	29.6752	29.27	45.9772	49.4084	84.3794	86.2866
YBR108W	27.8606	30.3599	43.9105	49.7639	50.7684	53.0248
YBR109C	426.768	434.399	477.738	447.56	313.86	304.249
YBR109W-A	32.9487	33.643	33.031	33.6401	51.0706	52.6043
YBR110W	117.588	123.084	105.14	113.157	161.723	162.861
YBR111C	169.056	169.506	199.033	193.075	132.028	131.829
YBR111W-A	88.581	93.2649	157.423	142.025	134.405	139.388
YBR112C	114.504	115.85	87.6284	93.5965	173.694	178.462
YBR113W	4.36525	7.51757	5.42332	5.22361	5.5413	6.5482
YBR114W	30.2377	28.4759	35.2209	32.4786	57.4915	62.0104
YBR115C	121.428	122.746	144.605	153.564	148.892	146.731
YBR116C	7.72879	8.50867	10.153	10.8083	9.73253	10.9304
YBR117C	5.75088	6.01585	9.37884	10.7459	8.05812	8.23915
YBR118W	2061.39	2015.07	1529.76	1492.54	1094.47	1016.23
YBR119W	35.7885	41.0967	50.8667	46.1419	89.9509	94.9826
YBR120C	72.1859	69.9743	85.0856	81.9381	93.5571	107.62
YBR121C	391.077	389.153	300.698	303.056	248.822	246.627
YBR121C-A	370.437	390.928	295.011	286.379	237.009	243.212
YBR122C	210.408	200.761	243.329	228.024	263.368	261.336
YBR123C	32.3674	31.0235	35.6135	38.5382	61.9472	64.61
YBR124W	0.377852	0.512851	12.522	13.3492	2.47819	2.71717
YBR125C	103.746	98.9777	95.6543	104.897	180.573	181.512
YBR126C	204.634	200.301	296.729	310.168	268.46	270.248
YBR126W-A	538.521	535.446	488.225	483.184	312.726	294.714
YBR126W-B	756.176	757.737	679.403	682.48	437.896	414.594
YBR127C	542.663	528.217	369.936	371.64	342.898	334.746
YBR128C	10.3827	9.98945	11.4773	12.1884	27.4799	31.2828
YBR129C	66.8419	63.4127	94.3084	91.6593	124.015	133.001
YBR130C	83.6064	86.2938	83.1304	81.6465	133.166	138.818
YBR131W	26.6265	27.7303	29.8684	31.6689	72.3843	78.0077
YBR131C-A	0	0	0	2.00238	0.396511	0.362289
YBR132C	35.5067	35.6333	80.3054	82.2755	82.0119	80.7776
YBR133C	106.675	107.005	117.912	119.853	188.616	184.255
YBR134W	1.01512	2.14326	3.63688	2.54034	2.92944	4.05547
YBR135W	253.586	258.395	306.472	299.96	278.24	280.57
YBR136W	26.2598	26.1167	23.8117	25.2221	45.397	43.7086
YBR137W	125.321	121.831	113.713	111.8	110.626	110.377
YBR138C	23.8371	25.0076	47.4192	50.3075	98.6292	101.358
YBR139W	171.08	174.067	258.352	260.9	217.481	212.74
YBR141C	42.7934	42.1812	33.703	37.915	65.3539	67.6236
YBR141W-A	16.2949	17.9498	133.892	138.915	88.8432	83.2132
YBR142W	117.163	118.579	84.5556	90.1849	111.791	114.332
YBR143C	370.347	380.728	308.251	310.324	325.166	323.901
YBR144C	5.6138	6.44727	3.09424	4.19547	1.13289	1.65618
YBR145W	48.5626	49.0705	103.606	103.931	99.5557	95.9962
YBR146W	218.91	217.787	178.75	177.559	228.228	228.748
YBR147W	6.7937	6.21638	33.98	30.3392	27.7557	28.0682
YBR148W	5.38904	4.7754	4.49394	4.69412	7.6247	8.55239
YBR149W	176.44	188.254	295.348	284.397	181.05	176.828
YBR150C	16.3356	17.4791	21.6597	21.8525	57.1953	58.2838
YBR151W	262.184	261.894	203.251	212.998	218.581	225.808
YBR152W	27.6401	29.647	37.4825	39.2934	85.1004	94.3564
YBR153W	65.1448	63.3005	93.0757	92.6001	162.019	165.78
YBR154C	284.229	272.856	251.568	230.738	276.786	281.126
YBR155W	97.9674	95.4488	54.0264	65.2072	71.8342	82.7257
YBR156C	23.6766	24.2412	35.9639	36.9252	66.1986	73.1885
YBR157C	84.2197	84.8608	63.7733	57.725	115.561	120.235
YBR158W	296.002	293.761	297.205	293.695	445.642	432.691
YBR159W	175.831	180.264	118.801	129.925	143.974	152.192
YBR160W	126.549	125.691	168.22	149.744	223.465	221.735
YBR161W	50.9348	50.877	70.182	69.4195	125.926	126.388
YBR162C	665.169	669.496	381.271	440.261	337.034	351.706
YBR162W-A	601.815	617.286	602.409	589.187	430.935	490.407
YBR163W	37.566	41.0631	52.4974	54.3309	99.2021	103.475
YBR164C	199.604	196.11	176.353	195.668	148.562	164.388
YBR165W	71.1938	75.1198	107.519	107.178	243.982	232.347
YBR166C	86.1302	89.2565	105.654	120.055	133.763	142.852
YBR167C	56.115	54.1222	103.834	99.4092	125.027	137.593
YBR168W	43.9732	43.8525	64.204	63.7474	114.385	115.171
YBR169C	32.308	35.5005	65.57	68.6408	47.9584	46.5598
YBR170C	53.6147	52.8563	60.8129	61.4157	121.615	121.594
YBR171W	258.911	246.268	178.045	184.084	205.381	213.435
YBR172C	113.111	110.46	110.819	110.496	216.187	244.23
YBR173C	370.65	392.107	425.334	421.442	452.9	453.493
YBR174C	2.37507	2.34446	4.06119	3.43266	6.34417	6.31417
YBR175W	87.3842	91.5342	163.219	167.161	209.636	203.547
YBR176W	40.4893	44.8294	45.6072	44.7818	81.367	81.8101
YBR177C	142.196	150.633	149.285	154.565	175.14	168.729
YBR178W	1.45095	2.46169	3.24895	2.88343	2.37906	2.34763
YBR179C	37.1054	38.7754	44.5497	44.0244	72.6087	76.8551
YBR180W	1.30567	1.14564	2.12628	2.02685	3.34231	2.57965
YBR181C	525.166	515.707	360.794	332.041	300.495	292.766
YBR182C	22.9214	26.1747	26.2677	23.5159	58.5575	62.3808
YBR182C-A	20.5784	21.4608	12.8084	15.0949	9.69926	9.69819
YBR183W	91.3996	91.1807	163.152	155.58	129.948	122.641
YBR184W	7.3984	7.79064	22.7085	21.3613	33.4613	36.1736
YBR185C	81.5023	84.6296	104.441	102.488	134.174	131.865
YBR186W	1.04327	1.08924	1.54541	1.13409	2.75803	2.94319
YBR187W	305.374	308.514	199.952	214.063	243.24	237.679
YBR188C	62.8681	69.9805	113.627	117.871	101.827	114.699
YBR189W	1286.7	1324.73	989.396	918.236	746.917	723.099
YBR190W	136.681	141.823	115.002	109.554	94.4763	95.5188
YBR191W	1203.26	1216.7	914.524	879.93	753.247	727.728
YBR191W-A	379.968	420.948	293.218	280.334	294.052	287.367
YBR192W	69.2129	67.0234	49.1532	57.211	96.2954	104.891
YBR193C	70.1388	74.0887	109.779	105.393	136.796	135.422
YBR194W	62.1627	69.1522	129.205	128.056	97.273	102.902
YBR195C	43.7879	45.0048	46.0364	43.8347	94.4033	95.9166
YBR196C	1010.68	993.804	876.704	861.783	543.434	519.6
YBR196C-A	29.4725	25.0271	20.712	24.8296	34.9722	28.9106
YBR196C-B	60.8881	52.7504	51.6351	61.7879	81.5679	76.7017
YBR197C	73.0052	72.1756	126.213	126.114	179.576	177.289
YBR198C	54.9611	56.1505	57.9952	62.5777	87.4656	93.0706
YBR199W	165.621	163.583	168.43	174.746	203.832	207.72
YBR200W	73.2294	72.6539	84.608	86.9151	105.873	108.096
YBR200W-A	0	0	0.369199	0	0	0.197612
YBR201W	77.1032	72.3797	61.5883	59.7882	99.5952	101.355
YBR201C-A	143.695	116.146	219.185	233.808	141.869	133.78
YBR202W	97.3304	94.3501	91.3287	89.8233	163.174	163.068
YBR203W	30.9062	29.6289	48.6464	49.6808	89.2985	88.9233
YBR204C	38.8906	40.4279	54.4372	57.1958	63.8741	67.0619
YBR205W	192.117	197.644	133.067	125.73	140.306	144.889
YBR206W	285.278	272.381	175.797	168.905	178.87	187.283
YBR207W	124.253	126.21	159.789	167.625	204.467	205.758
YBR208C	56.5914	58.1343	63.2625	68.2403	100.372	96.267
YBR209W	1.06939	1.54823	2.68192	2.26685	2.58106	3.17857
YBR210W	154.576	170.998	208.597	198.138	163.956	163.486
YBR211C	45.7608	40.8387	59.6682	57.0526	140.914	142.129
YBR212W	127.1	128.693	179.344	191.818	176.379	169.102
YBR213W	35.1196	37.2237	33.154	32.475	64.2347	63.0778
YBR214W	98.7997	98.6073	190.368	208.809	160.069	153.582
YBR215W	37.6645	39.324	43.6934	50.1236	74.6213	81.2545
YBR216C	45.9804	44.3103	66.1522	69.06	116.363	117.204
YBR217W	38.7955	41.9057	107.393	110.078	123.088	130.133
YBR218C	194.941	195.274	160.711	163.633	167.29	156.496
YBR219C	108.573	107.538	60.1246	74.7766	108.638	105.035
YBR220C	92.4222	96.5367	60.4472	69.1019	108.076	106.865
YBR221C	536.817	523.975	465.653	442.271	299.781	288.715
YBR221W-A	1.29549	0	1.16034	1.14422	0.679733	0.931599
YBR222C	159.99	157.325	193.205	192.251	167.518	154.519
YBR223C	22.6295	22.0949	55.0682	56.03	86.5848	87.8268
YBR223W-A	0	0	0	0	0	0
YBR224W	12.39	14.1929	22.6671	23.5164	53.0448	51.4998
YBR225W	40.033	41.0281	50.7761	53.8933	112.22	111.799
YBR226C	2.97869	4.49213	4.0019	2.77703	3.73357	6.26733
YBR227C	37.8142	39.1775	44.8991	44.1985	66.6458	74.829
YBR228W	32.1112	31.2082	63.4477	64.142	87.1673	97.1765
YBR229C	98.3523	97.6082	80.4157	86.134	99.9207	98.8308
YBR230C	299.259	289.324	379.194	388.314	297.647	289.267
YBR230W-A	99.8206	108.081	177.298	195.756	77.0533	92.9514
YBR231C	19.0169	20.3116	15.0291	19.3652	32.0861	40.7932
YBR232C	0.755704	0.854752	1.86138	1.16806	1.28866	1.99259
YBR233W	54.1588	54.06	62.9288	65.2952	118.407	126.565
YBR233W-A	165.857	186.786	168.219	192.861	178.805	205.132
YBR234C	258.627	254.108	245.939	254.017	199.193	197.668
YBR235W	41.1154	42.3091	35.3044	42.0483	50.1174	53.3738
YBR236C	69.2066	69.053	75.3225	76.109	84.4377	87.9441
YBR237W	22.4311	23.3619	35.834	39.8828	55.4742	62.8336
YBR238C	234.144	227.476	155.623	157.483	231.65	221.219
YBR239C	62.0675	63.6322	80.7256	83.7979	165.704	166.557
YBR240C	9.95317	9.91588	12.4717	12.0321	33.9188	33.088
YBR241C	52.2038	49.9637	78.7322	82.0609	64.2688	57.4328
YBR242W	147.884	147.804	155.99	150.807	174.1	178.764
YBR243C	123.656	128.75	88.8215	95.8826	91.745	91.8148
YBR244W	74.6895	78.9098	110.375	103.19	134.132	135.025
YBR245C	77.1621	76.1198	58.0426	60.4791	95.91	100.453
YBR246W	112.479	112.14	157.423	163.029	236.067	233.816
YBR247C	139.68	143.047	108.075	111.207	138.467	148.254
YBR248C	83.879	83.3916	93.6717	103.161	127.665	134.217
YBR249C	482.632	473.205	481.267	468.59	383.632	371.614
YBR250W	3.7641	4.73702	7.28533	7.48984	18.1835	18.9372
YBR251W	60.6526	62.6078	78.6525	75.6095	122.429	123.896
YBR252W	236.055	244.921	207.861	218.233	221.269	216.492
YBR253W	102.392	108.624	193.905	181.364	198.613	218.175
YBR254C	108.589	114.809	127.604	115.023	188.095	188.966
YBR255W	21.1706	20.7207	26.7045	27.8029	46.794	55.2191
YBR255C-A	77.9437	75.6137	119.654	130.569	119.346	128.717
YBR256C	155.947	154.156	276.721	261.734	189.031	187.632
YBR257W	44.2087	48.8674	55.4787	57.6401	103.319	104.805
YBR258C	58.501	66.563	86.4777	104.32	119.619	124.876
YBR259W	26.7184	26.0222	37.1047	37.2287	75.9816	79.346
YBR260C	54.2135	51.2082	52.3022	52.6564	87.5652	91.2185
YBR261C	124.059	127.046	138.133	130.628	129.981	139.66
YBR262C	211.244	207.633	383.725	378.769	352.746	346.781
YBR263W	334.387	332.988	101.157	105.788	224.194	218.569
YBR264C	62.2322	55.2853	72.9998	78.3934	73.0967	83.0909
YBR265W	144.361	145.004	179.654	183.334	202.22	193.164
YBR267W	149.261	149.846	106.065	107.946	156.119	173.043
YBR266C	0.30028	1.35855	0.941334	1.72391	0.315108	0.791757
YBR268W	265.209	264.36	256.889	275.989	248.118	262.591
YBR269C	116.291	111.868	233.445	212.195	164.309	155.367
YBR270C	13.9099	15.1037	44.8516	49.8029	68.714	71.2833
YBR271W	53.547	56.1694	42.9809	43.7187	68.3698	73.5446
YBR272C	40.7232	42.1796	52.0524	58.5729	75.2051	83.7181
YBR273C	59.6608	55.8151	48.9759	54.2981	82.9406	88.4416
YBR274W	50.1513	56.2194	65.4559	64.2811	82.5463	80.9386
YBR275C	29.3057	30.3698	22.8587	25.4137	58.6079	62.9101
YBR276C	70.1177	67.6608	55.5146	60.3194	69.5611	70.7405
YBR277C	0.845937	1.5309	2.72766	4.63238	7.27923	6.0021
YBR278W	43.6587	43.9732	80.4195	75.2381	107.647	105.404
YBR279W	102.223	104.042	105.035	110.894	157.92	181.599
YBR280C	15.884	16.527	28.8993	32.578	48.9796	52.8442
YBR281C	61.2559	60.0718	58.0532	61.8256	75.2964	77.3171
YBR282W	106.261	101.454	134.406	139.486	126.155	138.039
YBR283C	478.864	487.491	346.193	358.594	340.991	333.497
YBR284W	4.65923	5.19278	15.6239	15.3315	29.8277	29.6232
YBR285W	4.22152	2.26362	8.96262	7.87144	6.31682	6.67111
YBR286W	626.111	614.773	369.772	377.922	384.719	377.696
YBR287W	315.065	319.406	249.08	239.818	326.037	313.998
YBR288C	48.2932	50.9036	53.0723	52.3351	84.0291	86.7472
YBR289W	38.1856	41.2319	39.3119	43.2745	84.3307	91.8678
YBR290W	84.4886	83.6489	89.2956	102.607	115.111	131.774
YBR291C	55.6954	56.3452	151.347	149.979	124.029	124.917
YBR292C	27.6076	28.9513	42.4132	43.2773	50.4592	48.2078
YBR293W	44.149	45.0445	138.636	137.385	161.301	159.781
YBR294W	2.92616	2.64774	10.2238	10.6406	4.14953	4.51176
YBR295W	26.3596	28.4196	38.8599	42.8777	107.214	106.972
YBR296C	12.8535	13.343	10.2766	11.7705	20.8116	19.0721
YBR296C-A	2.83389	3.58996	6.59943	9.01073	2.67645	3.80403
YBR297W	29.4386	26.4189	96.3341	98.0699	66.1471	66.0231
YBR298C	12.7179	13.1423	119.062	128.153	125.897	128.339
YBR298C-A	0.306366	0	1.37202	1.89415	1.28598	1.61561
YBR299W	2.13147	2.24427	9.40668	7.97531	8.29622	7.59877
YBR300C	3.27775	3.83094	6.48322	4.82502	4.58615	5.63075
YBR301W	9.18087	7.45965	5.53798	6.12299	8.25791	6.8266
YBR302C	73.9794	75.3081	92.5523	89.9492	68.6485	67.2999
YDR293C	129.05	131.087	194.586	203.296	214.144	209.146
YDL183C	14.6197	13.2926	23.1526	24.1409	34.6854	38.1927
YDL112W	90.5583	92.6487	71.4028	79.5519	102.017	102.84
YDL033C	60.9625	63.407	80.8351	84.1672	177.348	177.383
YDR036C	65.0267	70.9598	58.9723	59.512	77.1178	80.0506
YDR100W	156.809	144.88	266.374	250.02	159.761	156.237
YDR166C	50.2636	53.5011	46.0435	48.288	86.5348	89.2863
YDR351W	63.1122	61.471	76.4583	80.5121	146.429	152.111
YDR420W	91.8287	93.4794	60.6362	67.7679	149.612	140.292
YDR496C	138.718	133.981	119.765	115.602	164	166.851
YDL248W	61.5781	61.649	91.2709	90.4202	71.217	69.3726
YDL247W-A	60.7586	67.2861	127.521	147.376	136.082	140.858
YDL247W	7.13583	8.60917	12.6496	14.0167	15.1714	14.6638
YDL246C	0.126654	0.0573018	0.170161	0.391528	0.431953	0.121438
YDL245C	0.19957	0.433395	0.929497	1.86842	0.963353	1.09069
YDL244W	4.85335	5.17363	18.6981	20.2	9.76742	9.72124
YDL243C	24.3886	26.2953	83.6235	88.3476	78.5812	73.5446
YDL242W	4.41895	3.47696	14.1109	15.2724	15.6252	16.1188
YDL241W	79.5317	89.3354	138.539	141.297	129.122	120.081
YDL240C-A	0	0.891915	3.09003	1.3059	0	0.236275
YDL240W	38.8839	40.8467	32.9323	33.8911	80.79	82.4865
YDL239C	12.525	11.9817	16.9687	17.7708	46.3632	49.9464
YDL238C	16.3787	19.0488	38.3741	36.9828	51.0285	51.4376
YDL237W	144.144	147.166	142.921	144.008	153.879	151.689
YDL236W	162.537	162.081	124.82	129.483	174.477	178.795
YDL235C	279.61	282.434	236.661	248.272	292.639	299.859
YDL234C	42.368	45.7241	63.6905	68.5958	80.385	85.8581
YDL233W	26.8201	29.4079	45.7879	46.1552	50.8207	54.2012
YDL232W	388.473	383.668	574.603	555.256	366.183	359.547
YDL231C	62.9395	65.7506	130.816	135.81	180.458	177.2
YDL230W	35.8285	41.8828	52.9405	55.1848	69.6372	67.7674
YDL229W	1523.65	1476.24	1021.15	1005.66	756.786	742.503
YDL228C	0.847518	0.38344	0.0948875	0.187139	0.166757	0.203153
YDL227C	66.9706	64.4078	34.9041	34.4533	139.177	142.311
YDL226C	155.551	154.582	156.638	149.753	148.641	148.343
YDL225W	86.0024	85.9583	71.9904	78.862	110.829	120.756
YDL224C	140.142	139.59	200.123	205.106	285.177	264.125
YDL223C	12.8621	15.1847	30.3522	33.8703	49.4786	50.7204
YDL222C	12.2863	14.426	26.0702	40.629	22.8697	28.2235
YDL221W	3.08031	2.67574	15.2294	18.7179	5.75371	5.31619
YDL220C	27.5485	29.4959	37.78	42.1475	58.1392	57.081
YDL219W	154.644	166.694	155.724	155.417	164.959	172.891
YDL218W	15.9696	15.2888	26.8192	31.3581	22.7058	19.8575
YDL217C	92.2104	95.272	118.126	123.127	155.669	163.866
YDL216C	20.9746	22.6538	37.8491	43.771	68.3509	72.926
YDL215C	34.3074	34.8345	92.352	89.5486	131.959	129.251
YDL214C	1.7813	2.60821	5.88872	5.89273	11.8443	12.7163
YDL213C	168.93	167.471	144.927	163.823	146.955	174.62
YDL212W	451.166	450.142	428.638	403.609	353.421	337.083
YDL211C	37.7447	40.9731	56.8893	60.2326	147.336	147.295
YDL210W	6.97573	7.99761	9.22997	10.327	7.36179	7.75247
YDL209C	30.2059	31.8571	49.3315	53.7699	75.6402	80.2043
YDL208W	352.774	373.434	340.157	311.071	294.655	320.729
YDL207W	48.623	49.5534	45.6601	52.3443	84.6355	96.2048
YDL206W	33.9027	37.1027	54.2379	54.6391	86.5724	84.8838
YDL205C	234.245	234.973	167.152	174.842	299.813	299.087
YDL204W	41.6596	43.3711	184.763	196.122	193.586	192.712
YDL203C	62.8542	66.9994	88.1225	91.3588	119.106	112.501
YDL202W	85.7875	88.7027	95.0317	100.44	105.868	118.251
YDL201W	162.016	158.394	118.369	113.166	157.458	163.674
YDL200C	55.4183	54.9212	79.5047	77.023	73.0712	81.6587
YDL199C	12.1264	11.9566	27.9207	28.3186	36.0663	35.3547
YDL198C	256.01	257.618	284.958	302.886	251.975	244.635
YDL197C	34.3946	35.6071	126.314	128.708	129.13	137.883
YDL196W	4.32812	5.40825	12.3682	12.5604	16.329	14.5245
YDL195W	287.589	294.298	180.729	205.912	237.85	226.391
YDL194W	13.9613	15.9708	18.5621	24.2549	32.6617	36.3148
YDL193W	62.1044	62.0332	62.2139	58.7402	81.1476	85.8509
YDL192W	619.22	649.574	521.037	494.765	387.251	390.794
YDL191W	1703.89	1635.53	1222.22	1138.05	882.908	867.068
YDL190C	95.6099	97.8362	105.983	108.861	145.897	144.422
YDL189W	61.7268	60.6911	72.6669	73.4062	87.4488	97.1298
YDL188C	175.671	179.308	159.976	165.064	223.305	219.098
YDL187C	26.1748	24.9898	109.467	117.959	31.036	28.6537
YDL186W	1.22326	2.13995	2.26433	3.24127	4.53563	5.23885
YDL185C-A	0.298304	0.269922	0.534367	0.526943	0.313035	0.429026
YDL185W	471.166	473.871	374.069	373.953	257.713	239.546
YDL184C	2031.68	2064.82	1338.63	1370.86	945.678	966.475
YDL182W	142.738	143.981	157.241	155.85	143.215	141.799
YDL181W	544.634	581.072	382.507	382.316	384.8	393.167
YDL180W	71.5299	74.2698	79.0004	79.9492	142.917	140.241
YDL179W	104.51	111.65	146.536	152.903	261.463	256.714
YDL178W	92.9046	93.6847	94.761	95.9712	105.378	107.909
YDL177C	41.8952	37.5491	67.2114	59.9544	89.2497	98.962
YDL176W	24.7496	26.5323	46.7409	48.6334	80.1634	82.0745
YDL175C	27.2711	26.9953	43.2605	39.4673	67.1999	68.5828
YDL174C	101.866	108.013	120.903	131.858	120.673	123.77
YDL173W	119.177	111.372	155.519	158.026	174.692	190.716
YDL172C	5.2427	5.89779	4.31501	3.00358	5.12986	5.50226
YDL171C	267.88	273.011	109.232	114.209	148.065	140.994
YDL170W	34.5852	36.2971	56.7722	63.3268	98.4905	103.16
YDL169C	9.51377	8.60857	24.9292	29.5888	19.8609	22.1255
YDL168W	123.783	128.756	126.348	144.668	112.498	121.493
YDL167C	117.512	121.888	93.3227	104.458	172.978	183.862
YDL166C	85.4174	93.2457	75.4806	82.8259	90.3564	99.849
YDL165W	89.8579	82.5904	78.0509	70.8135	101.668	102.799
YDL164C	44.3526	46.5636	51.6781	55.8602	90.5681	95.5321
YDL163W	0.448933	0.203109	0.804195	0.198256	0.117775	0
YDL162C	1.3336	1.03432	3.24212	3.87016	7.89689	6.66733
YDL161W	185.006	185.438	135.001	164.988	187.58	219.093
YDL160C-A	82.8475	84.5888	88.4937	81.0842	82.2392	89.0962
YDL160C	211.15	210.36	368.43	367.38	452.749	436.354
YDL159W-A	0.515253	0	0.461498	0.910175	0.540696	0.49403
YDL159W	35.2808	37.8476	46.3573	45.6357	85.78	86.8861
YDL159C-B	0.768512	0.695391	1.37667	0.678775	1.61292	1.2895
YDL158C	35.6575	47.0031	40.6119	28.7721	29.3341	29.8624
YDL157C	164.223	169.284	146.919	132.763	111.556	114.441
YDL156W	22.6278	25.2993	31.0607	32.2372	62.1604	65.8354
YDL155W	76.4356	77.6466	81.2712	83.651	163.422	169.074
YDL154W	11.612	12.2129	30.9542	29.4586	34.7628	37.3535
YDL153C	74.952	79.6724	36.3579	54.6641	48.8662	70.8509
YDL152W	0.371658	0.504444	1.66442	0.82065	0.975026	1.06905
YDL151C	0	0	0.418679	0.206431	0.183948	0.392168
YDL150W	104.941	102.231	79.8796	80.0007	126.237	135.666
YDL149W	13.062	13.1759	16.9487	18.1378	38.4393	39.2927
YDL148C	84.0592	83.1944	66.8518	76.3425	97.2453	112.332
YDL147W	222.543	223.217	254.325	255.731	279.62	289.872
YDL146W	33.7302	36.7335	28.6429	28.0822	70.3323	67.664
YDL145C	275.694	278.493	207.857	205.886	241.835	228.676
YDL144C	161.937	161.871	135.316	148.132	153.64	152.953
YDL143W	210.383	213.013	170.739	185.93	215.735	222.612
YDL142C	50.2117	50.7072	76.2187	73.4678	159.875	154.113
YDL141W	76.2156	77.3062	84.8088	88.6729	112.205	105.73
YDL140C	276.904	280.583	163.782	188.841	252.758	243.793
YDL139C	21.3554	21.9793	27.3767	29.3206	51.8296	60.9421
YDL138W	54.7786	58.2395	64.2667	67.9605	120.261	117.521
YDL137W	425.644	436.656	409.689	407.848	309.736	308.682
YDL136W	698.121	697.477	508.487	491.494	414.272	413.997
YDL135C	189.41	192.408	173.951	176.565	159.679	162.762
YDL134C	163.845	160.342	161.35	158.73	242.022	243.399
YDL133C-A	1607.91	1591.42	1487.02	1398.59	966.723	973.163
YDL133W	46.2739	48.194	78.6275	78.9982	138.236	150.921
YDL132W	85.1	89.6735	96.8513	100.217	157.074	159.141
YDL131W	196.74	206.722	214.525	217.356	227.629	227.7
YDL130W-A	175.897	164.112	395.616	372.167	214.663	231.49
YDL130W	1772.37	1701.52	1368.09	1344.59	865.913	821.549
YDL129W	66.0723	67.3029	29.6939	34.2874	144.251	143.265
YDL128W	347.771	336.789	288.62	298.705	252.66	237.66
YDL127W	63.171	69.6415	58.2235	58.4515	153.561	155.573
YDL126C	326.833	329.427	257.856	271.112	242.061	250.993
YDL125C	505.894	504.852	762.175	752.091	600.302	572.963
YDL124W	285.815	285.951	419.807	422.74	259.721	267.063
YDL123W	184.424	183.899	233.302	267.127	266.59	266.321
YDL122W	131.045	124.578	111.231	114.161	158.913	167.659
YDL121C	282.331	264.905	282.117	265.116	237.827	242.806
YDL120W	166.989	175.366	188.091	183.19	148.725	149.429
YDL119C	36.4357	40.4953	78.191	83.021	70.2519	81.4797
YDL118W	0.357025	1.45375	1.91867	1.57668	0.936639	0.34232
YDL117W	69.8045	69.7616	73.1793	72.2079	154.518	156.332
YDL116W	69.6661	70.487	68.3475	66.737	135.741	138.886
YDL115C	38.6818	43.404	71.8165	80.3217	86.7955	100.735
YDL114W-A	6.56269	5.39843	10.153	8.95804	15.9648	14.3009
YDL114W	1.10054	1.32777	1.57716	1.36084	1.80932	2.18077
YDL113C	25.6774	25.0265	45.8705	46.6702	76.5123	78.6579
YDL111C	212.989	217.325	249.091	249.771	282.67	271.757
YDL110C	139.63	131.236	300.555	313.353	292.971	292.734
YDL109C	15.394	16.2403	55.6846	55.7454	87.4893	82.102
YDL108W	53.0224	53.1227	62.6375	65.8765	104.113	103.872
YDL107W	36.6473	32.9856	49.9572	56.1464	72.0478	81.5458
YDL106C	32.8731	34.2511	60.7002	63.1824	112.559	121.671
YDL105W	20.4771	23.6701	35.4724	39.5508	71.6081	74.7052
YDL104C	38.8965	63.3522	45.2404	50.5995	65.1327	55.8884
YDL103C	72.7563	72.3141	70.5185	74.1888	77.6431	80.1507
YDL102W	45.9204	48.0342	40.2975	45.6646	73.5386	76.6349
YDL101C	52.3553	52.5622	55.5845	53.332	104.119	105.726
YDL100C	297.087	313.2	267.809	267.868	242.296	241.774
YDL099W	60.5226	65.501	59.3741	72.484	67.9633	89.1421
YDL098C	56.8522	55.9665	51.1293	54.3211	84.4263	90.5722
YDL097C	143.688	146.003	138.314	144.31	161.394	174.573
YDL096C	1.24795	0.564607	5.2162	2.93928	1.52784	2.49281
YDL095W	344.363	346.356	190.846	199.504	264.911	254.909
YDL094C	1.73367	2.29275	13.8558	13.0744	16.0237	15.2801
YDL093W	63.4121	64.6578	66.9222	69.0069	89.1989	84.7142
YDL092W	253.238	249.797	255.827	266.712	224.959	245.543
YDL091C	47.8778	47.5512	55.0843	56.2512	83.3194	87.426
YDL090C	41.5637	46.1566	47.0045	48.7618	69.6923	70.5205
YDL089W	32.1603	36.2485	32.4476	31.4601	47.7284	51.7214
YDL088C	94.7987	95.6288	115.579	118.932	181.938	191.486
YDL087C	34.0932	33.8247	65.103	61.9822	95.9798	93.8355
YDL086W	287.03	280.608	374.844	373.876	248.412	237.524
YDL086C-A	13.9154	12.4499	13.724	14.0857	9.10607	7.94537
YDL085C-A	174.798	176.896	146.262	148.002	118.608	126.486
YDL085W	1.95154	2.36701	6.50831	8.72834	6.81911	7.68371
YDL084W	447.793	441.947	292.823	289.607	305.553	303.788
YDL083C	1268.17	1285.83	930.124	881.327	733.875	716.275
YDL082W	840.305	834.922	573.744	542.246	512.569	504.36
YDL081C	1981.92	1897.84	1349.68	1297.43	1039.12	957.661
YDL080C	43.3724	47.4513	61.517	68.6063	100.369	104.072
YDL079C	9.03232	8.86762	21.3981	23.8531	19.9756	22.0837
YDL078C	186.509	180.869	168.35	163.334	148.934	144.168
YDL077C	28.2633	28.4461	43.416	42.4696	65.7415	68.0792
YDL076C	88.7632	89.8446	115.778	111.115	154.397	164.098
YDL075W	1265.8	1246.68	938.882	902.303	618.765	629.429
YDL074C	85.1865	86.9433	77.7477	75.0394	148.785	160.41
YDL073W	40.0255	41.6112	44.2401	51.9604	82.12	88.8803
YDL072C	316.729	313.744	486.048	493.333	292.66	282.425
YDL071C	11.789	9.84674	13.808	15.0579	11.6098	11.9121
YDL070W	134.998	133.871	70.6735	72.7627	160.838	173.933
YDL069C	24.6425	23.4574	30.0175	29.5134	51.7188	57.3204
YDL068W	4.94643	5.03527	4.06119	3.45866	3.24418	3.85343
YDL067C	924.982	939.201	1152.02	1212.78	744.052	733.635
YDL066W	395.873	403.252	170.683	182.688	285.959	284.004
YDL065C	53.9348	56.3389	54.1689	67.1937	69.9847	90.9419
YDL064W	179.36	179.173	156.664	147.898	174.138	173.073
YDL063C	101.308	105.841	75.1417	72.6469	124.719	123.966
YDL062W	0.798279	1.44465	3.14599	2.53823	1.75917	1.22464
YDL061C	1390.5	1398.55	1183.09	1222.51	732.293	738.497
YDL060W	119.648	119.184	89.1248	92.8609	131.587	140.383
YDL059C	25.5169	27.6382	27.9525	31.5857	50.4182	53.7976
YDL058W	46.4815	48.2555	26.0542	28.1631	66.2113	73.2042
YDL057W	16.9517	17.8952	30.0577	29.8228	45.0504	47.9344
YDL056W	49.7188	51.4081	58.5804	59.7834	114.546	123.986
YDL055C	906.031	907.095	803.038	738.061	759.657	734.625
YDL054C	72.6686	73.2103	91.2724	92.636	104.713	101.746
YDL053C	153.335	151.76	183.518	165.897	197.872	205.453
YDL052C	249.457	256.426	230.646	258.861	282.123	283.336
YDL051W	251.107	264.75	232.341	221.931	247.345	254.193
YDL050C	0.365663	0	0.491272	0	0.09593	0.262951
YDL049C	26.0423	27.4537	28.0056	26.3511	43.911	47.3534
YDL048C	412.928	407.482	186.475	210.108	217.532	224.523
YDL047W	149.978	148.267	196.746	203.127	260.706	257.329
YDL046W	711.274	710.8	701.371	751.7	433.496	421.254
YDL045W-A	214.903	224.8	260.17	253.01	287.718	285.189
YDL045C	85.3675	85.7981	86.449	92.488	123.099	125.114
YDL044C	24.8817	25.2588	44.7559	43.4531	88.9856	94.3922
YDL043C	50.352	52.7065	61.0699	64.6463	88.6134	98.8763
YDL042C	69.9865	71.7081	54.7503	54.3809	111.558	110.424
YDL041W	2.49767	3.12926	6.36711	6.44836	2.82262	3.40797
YDL040C	133.004	131.554	115.946	119.089	145.179	150.077
YDL039C	327.937	327.873	52.0575	59.4127	86.6708	80.8697
YDL037C	338.413	366.509	22.1575	28.362	31.4196	27.3203
YDL036C	56.4574	58.5736	46.3133	41.6911	70.8067	76.7379
YDL035C	57.974	62.1392	42.4483	44.2107	87.4714	92.892
YDL034W	0.788561	0.178383	0.176573	1.21884	2.68938	1.70118
YDL032W	0.435983	1.1835	10.153	10.397	2.6307	3.03068
YDL031W	96.2384	92.6015	61.5294	64.2331	92.4873	99.7712
YDL030W	45.513	46.3208	36.0612	39.9346	72.5368	82.6509
YDL029W	162.573	168.194	207.67	202.026	178.642	182.078
YDL028C	36.5405	36.6035	42.4434	41.5135	101.382	104.623
YDL027C	54.7122	61.8345	82.4295	85.2797	109.064	115.967
YDL026W	3.26987	3.74776	6.05273	6.16118	5.60453	6.06137
YDL025C	43.0058	47.0072	78.4116	85.19	110.659	113.657
YDL025W-A	15.5459	19.3418	14.5042	20.0238	12.5751	6.5212
YDL024C	4.78559	4.24278	7.18717	7.3862	10.2214	9.87217
YDL022C-A	1.09258	1.97726	3.66975	4.58377	2.86634	2.48801
YDL023C	3.81383	9.77772	4.74438	11.0412	7.00379	4.77408
YDL022W	203.346	195.093	385.554	387.553	292.588	282.225
YDL021W	5.74044	6.44351	19.2646	17.8418	8.76899	10.9035
YDL020C	93.8806	91.2335	201.151	206.449	326.003	325.978
YDL019C	85.9701	86.945	49.642	60.0871	76.6803	82.1583
YDL018C	102.02	99.8471	125.07	123.864	139.217	139.561
YDL017W	21.6447	22.8562	27.0213	30.8635	44.467	49.4866
YDL016C	104.601	112.116	99.1171	104.084	81.3828	75.5426
YDL015C	385.409	390.558	378.108	367.383	305.109	293.419
YDL014W	629.4	650.883	580.948	674.523	409.192	399.987
YDL013W	44.2087	43.2118	45.0988	45.0214	99.6137	106.443
YDL012C	509.47	523.678	589.624	620.554	478.897	489.19
YDL011C	0	0.37989	0	0.92703	0.660851	0.301907
YDL010W	74.7561	82.5867	95.3153	101.932	109.673	122.694
YDL009C	3.35868	5.31846	4.13639	8.52868	7.04908	9.25849
YDL008W	100.654	107.513	117.31	108.925	115.442	113.008
YDL007C-A	0.263618	0	0.708346	0.931342	0.138318	0.12638
YDL007W	150.882	152.45	118.868	130.429	142.282	159.73
YDL006W	86.5844	89.9854	80.7917	83.7877	149.24	155.823
YDL005C	52.8993	48.5784	64.7722	67.9977	106.755	129.644
YDL004W	397.378	414.74	389.596	373.115	314.007	317.081
YDL003W	72.1717	72.9388	70.3008	78.0471	161.562	176.429
YDL002C	86.7948	88.492	96.7518	88.2424	126.883	141.133
YDL001W	54.074	54.2123	74.1567	74.6132	117.932	127.751
YDR001C	70.4553	70.026	130.044	133.27	120.662	125.25
YDR002W	367.676	368.745	288.103	272.503	211.348	226.52
YDR003W	73.2782	75.3478	154.171	147.19	170.086	170.087
YDR003W-A	136.58	139.596	253.081	231.007	309.568	325.795
YDR004W	40.3752	36.5782	53.4297	58.5513	105.174	112.907
YDR005C	71.3339	76.3578	115.939	114.935	148.031	150.789
YDR006C	112.199	115.17	110.489	121.12	176.452	178.007
YDR007W	22.4696	26.1668	103.425	108.129	84.8004	86.8527
YDR008C	14.9203	12.7994	46.3392	41.2457	35.991	35.2999
YDR009W	5.52636	6.06365	14.9274	15.6424	20.1147	22.1337
YDR010C	0.408489	0.924056	3.47579	5.95304	2.57196	2.83956
YDR011W	197.248	206.206	221.067	235.087	188.527	186.128
YDR012W	1723.07	1659.89	1264	1245.73	945.137	889.703
YDR013W	40.7863	46.8191	80.2521	75.784	100.968	102.29
YDR014W	21.0617	23.8064	36.7888	39.9859	68.6734	71.8875
YDR014W-A	3.33808	3.14633	4.48475	3.07114	5.54628	5.00092
YDR015C	0.566778	0	0	0	0.148691	0
YDR016C	81.1387	73.2027	138.508	130.682	124.087	122.301
YDR017C	62.5775	60.2149	60.2802	60.4145	111.925	117.725
YDR018C	3.54058	3.2037	23.7329	24.765	19.5359	20.6149
YDR019C	35.2222	38.6749	150.244	151.552	160.75	163.355
YDR020C	90.7818	93.5898	102.401	106.651	178.277	186.82
YDR021W	53.4472	49.0286	42.8455	43.2015	75.6542	79.7488
YDR022C	36.8262	39.2578	56.7948	56.7173	65.696	68.7981
YDR023W	377.574	363.36	322.351	306.066	287.44	283.876
YDR024W	66.6139	68.3801	78.9675	70.7015	62.1934	61.7233
YDR025W	1221.35	1236.07	1027.07	970.965	792.44	767.867
YDR026C	57.1741	56.8358	72.6533	76.5185	117.287	129.51
YDR027C	50.9718	49.9713	44.5133	47.4723	102.407	109.944
YDR028C	93.3201	94.9507	100.349	105.88	135.677	140.779
YDR029W	0.863662	0.781487	0.773559	1.14422	1.35947	0.621066
YDR030C	13.3701	14.1211	16.7414	20.3003	25.6676	30.0978
YDR031W	53.5187	46.7451	92.0425	89.6149	67.5693	71.0026
YDR032C	309.649	318.328	362.548	374.818	178.31	174.554
YDR033W	1189.28	1173.45	909.655	863.022	728.913	703.822
YDR034C	62.4817	63.2797	86.4863	86.0696	148.022	147.723
YDR034C-D	85.0647	99.7323	79.5382	86.3931	67.4829	63.377
YDR034C-C	45.6004	62.0561	45.5611	53.9595	31.2963	27.3326
YDR034C-A	0	0	0.688337	0	0.201616	0.184215
YDR034W-B	9.59163	12.2295	96.0627	89.3372	15.0979	18.8111
YDR035W	246.694	246.334	262.718	255.021	255.765	255.604
YDR037W	426.117	425.632	380.153	366.179	321.154	317.596
YDR038C	78.6223	77.9421	61.6988	64.6741	91.6114	89.1887
YDR039C	34.5672	34.6409	38.4734	38.6358	38.8232	37.8313
YDR040C	134.117	136.216	160.662	167.727	167.613	163.866
YDR041W	111.355	108.905	145.028	131.333	158.721	163.936
YDR042C	22.5583	20.0037	17.4772	14.2458	18.2868	16.7085
YDR043C	96.7431	105.4	139.516	143.706	317.943	323.202
YDR044W	176.27	179.139	151.461	155.748	166.896	167.391
YDR045C	170.748	168.548	199.584	195.007	193.647	210.813
YDR046C	266.582	266.75	354.498	377.507	314.784	309.945
YDR047W	138.837	139.586	151.092	177.788	175.612	190.127
YDR048C	1.07958	0.976859	4.44797	5.9118	1.58604	2.58778
YDR049W	50.034	48.3198	56.8438	59.8185	95.9706	106.746
YDR050C	1306.73	1280.03	1051.67	990.417	670.103	640.116
YDR051C	104.219	105.999	97.3472	109.384	146.437	161.018
YDR052C	73.7696	74.578	75.6072	81.4019	148.751	160.563
YDR053W	0.858754	0.932457	0.615331	1.06187	1.35174	1.31741
YDR054C	170.646	174.647	192.632	189.685	318.361	331.017
YDR055W	304.812	302.317	607.261	628.884	423.206	411.69
YDR056C	203.6	195.481	144.704	155.428	164.456	180.546
YDR057W	52.4818	54.9686	51.1949	56.642	85.4579	93.4745
YDR058C	12.7568	12.2959	28.3165	28.9642	34.7402	35.7968
YDR059C	101.64	97.6138	217.641	228.326	128.054	125.464
YDR060W	176.707	173.29	121.262	127.267	190.789	199.195
YDR061W	63.9829	61.0863	61.557	64.1134	90.5807	93.4906
YDR062W	234.82	238.649	159.232	159.834	193.31	195.075
YDR063W	152.35	169.172	149.181	147.376	181.205	194.839
YDR064W	1433.35	1419.25	1152.76	1088.27	885.888	859.268
YDR065W	39.086	34.6945	55.0368	53.014	95.4551	96.3925
YDR066C	28.08	29.4694	37.6227	36.3885	48.7889	46.9504
YDR067C	58.5419	55.0688	90.4291	80.0954	130.954	126.898
YDR068W	65.9722	68.6	71.9522	83.1859	102.506	128.397
YDR069C	24.9456	27.3078	43.2624	46.6143	76.1069	74.9551
YDR070C	33.5243	37.3181	67.8304	72.8527	59.2235	67.4088
YDR071C	294.843	291.684	305.541	288.364	242.429	250.375
YDR072C	152.987	153.972	170.947	165.348	210.196	199.341
YDR073W	99.6196	104.622	183.351	175.385	231.119	230.416
YDR074W	86.1604	88.3453	165.436	175.013	157.915	159.431
YDR075W	105.432	115.848	90.6867	102.128	163.224	173.547
YDR076W	11.6976	12.5	25.8938	26.4197	47.4351	49.3763
YDR077W	3092.17	3031.36	5538.97	5811.88	2526.76	2356.38
YDR078C	14.4731	16.2098	29.4617	30.1252	41.9522	44.2995
YDR079W	109.307	105.684	114.402	111.919	103.872	121.011
YDR079C-A	134.784	127.862	160.222	160.191	119.605	125.511
YDR080W	28.8355	30.5748	31.8392	33.5142	59.4047	62.3771
YDR081C	44.0202	46.6107	36.577	41.4749	88.7139	92.454
YDR082W	29.9534	29.4242	84.5465	88.1049	123.303	126.208
YDR083W	135.623	138.117	105.508	110.564	136.599	157.443
YDR084C	128.205	112.827	142.954	137.864	123.354	117.762
YDR085C	23.9124	24.6763	49.604	52.1716	70.7973	72.3702
YDR086C	713.72	729.388	614.693	586.872	463.917	480.502
YDR087C	169.261	162.862	143.815	138.516	164.573	171.016
YDR088C	40.074	38.9928	43.1037	45.7987	71.5272	83.6291
YDR089W	40.4692	43.6218	61.548	61.5446	142.949	143.241
YDR090C	75.8863	73.6791	96.3715	103.918	129.051	129.62
YDR091C	245.399	244.619	225.733	218.914	281.62	271.663
YDR092W	204.629	200.079	243.276	230.144	241.537	237.77
YDR093W	114.733	115.695	72.1723	80.1575	129.44	124.029
YDR094W	230.557	228.219	108.963	124.97	177.049	160.119
YDR095C	3.30965	2.3958	0.444655	0.876957	0.347309	0.634666
YDR096W	64.2897	63.6738	83.5833	86.7626	137.786	135.148
YDR097C	47.2026	47.9926	40.6609	44.51	73.5347	76.614
YDR098C	207.528	197.609	188.859	181.055	181.008	184.387
YDR098C-B	55.8644	85.3623	31.8581	39.5688	25.579	21.007
YDR098C-A	43.4915	74.2878	22.378	28.4239	17.5598	13.0621
YDR099W	546.424	538.98	509.353	473.776	450.72	449.463
YDR101C	192.704	194.538	173.147	174.484	224.689	225.406
YDR102C	5.5146	8.68613	6.40277	6.31383	20.8972	22.3248
YDR103W	68.8777	67.0841	63.0634	67.2478	136.226	136.249
YDR104C	14.1922	15.2456	16.9488	16.9544	35.791	38.1799
YDR105C	121.917	121.656	130.318	137.125	158.102	150.258
YDR106W	5.72744	7.41385	11.1861	10.3281	13.2309	13.767
YDR107C	27.5894	29.4451	21.7542	24.7843	40.1931	38.5006
YDR108W	28.4443	31.1673	37.6778	40.7352	88.5087	89.3283
YDR109C	23.3361	23.0926	33.9756	37.1112	57.0012	59.9901
YDR110W	50.6202	51.5926	35.4906	36.834	92.3933	97.6071
YDR111C	45.6546	44.5817	73.3492	72.8821	77.7879	74.6686
YDR112W	0.440216	1.19499	1.57716	1.55525	1.15489	0.949689
YDR113C	48.1307	44.9773	61.2436	63.6587	104.609	114.818
YDR114C	1.57127	0.609328	2.01049	1.98256	1.76663	1.82938
YDR115W	219.867	210.172	288.114	275.045	264.503	256.234
YDR116C	100.831	101.494	112.038	111.321	163.373	165.69
YDR117C	57.2386	59.2225	58.0836	59.4701	87.3024	91.1931
YDR118W	23.5391	22.2733	30.1013	30.4497	71.6816	76.1971
YDR118W-A	35.46	38.3981	45.8185	43.6417	103.398	110.916
YDR119W	179.571	187.961	121.888	131.236	213.559	216.511
YDR119W-A	40.9434	38.5786	192.149	198.445	140.968	139.833
YDR120C	116.492	116.582	72.8666	79.6395	113.703	125.075
YDR121W	129.812	133.602	143.275	147.689	154.277	163.471
YDR122W	48.6418	49.0411	69.0211	72.4243	92.7165	92.8173
YDR123C	69.6486	73.0434	118.041	127.89	210.411	213.845
YDR124W	14.091	13.3815	54.2949	56.3748	54.9015	56.2161
YDR125C	16.2293	19.2037	40.5671	43.0028	50.4372	50.7045
YDR126W	47.9659	50.0981	90.0812	97.2078	97.2098	95.6571
YDR127W	185.521	192.179	205.245	221.598	190.707	184.001
YDR128W	43.8229	45.0809	41.6722	46.0078	60.8017	63.3485
YDR129C	225.865	224.921	210.133	215.591	210.601	212.218
YDR130C	34.0067	34.7755	70.584	72.7579	111.824	112.855
YDR131C	27.4333	24.9704	55.3765	55.6857	89.8022	87.5347
YDR132C	34.6009	31.4742	41.5944	41.501	57.9177	59.2517
YDR133C	1261.89	1211.06	2672.04	2652.44	1444.75	1359.46
YDR135C	201.857	202.948	153.045	158.381	153.925	149.15
YDR136C	3.08612	3.00729	4.67781	2.72576	1.93065	1.30879
YDR137W	49.6784	50.4201	74.3735	76.3258	119.795	124.99
YDR138W	45.4326	48.2203	49.8075	49.9665	110.928	113.06
YDR139C	309.839	295.087	278.556	276.226	226.774	235.07
YDR140W	110.7	109.778	146.623	150.089	168.249	164.597
YDR141C	51.3336	51.8103	57.643	59.989	82.7631	81.8828
YDR142C	61.0191	61.7604	64.1041	64.3852	147.394	145.542
YDR143C	141.63	138.461	118.479	123.453	260.276	248.787
YDR144C	201.572	198.612	116.121	121.854	226.828	225.948
YDR145W	117.344	122.932	122.888	126.595	195.92	205.538
YDR146C	61.0204	64.0269	56.1702	59.7331	136.243	142.303
YDR147W	35.2568	38.3057	77.5041	74.2192	128.203	127.499
YDR148C	140.766	140.15	146.955	145.691	148.666	148.601
YDR149C	0.288192	0.173848	0.344168	0.25454	0.151212	0.0460536
YDR150W	50.3812	53.4529	29.9307	35.8594	57.0318	59.9061
YDR151C	86.5814	85.9576	133.234	129.664	243.526	245.512
YDR152W	163.812	175.526	175.043	188.646	209.644	228.283
YDR153C	114.841	116.014	119.322	117.956	229.302	240.931
YDR154C	1836.94	1759.47	1186.07	1153.34	792.92	722.812
YDR155C	2050.28	1967.46	1385.54	1334.47	919.661	845.622
YDR156W	548.707	539.014	599.172	634.234	522.963	484.364
YDR157W	181.538	184.626	199.574	212.193	166.179	155.162
YDR158W	397.983	434.662	343.203	437.844	253.734	293.959
YDR159W	42.3125	43.3915	29.3048	30.4818	82.7922	86.1145
YDR160W	34.6844	34.15	56.3472	60.7758	97.1567	101.666
YDR161W	124.399	122.133	93.1561	97.8485	96.3276	104.009
YDR162C	76.3357	77.7283	106.413	122.424	130.648	149.272
YDR163W	73.5523	75.1793	76.1472	94.4306	115.912	148.333
YDR164C	57.0374	56.3641	56.4645	59.5192	81.0358	84.3708
YDR165W	126.5	129.123	128.361	120.368	164.476	162.761
YDR167W	84.8798	87.705	73.2779	86.8667	86.3704	99.7607
YDR168W	142.466	140.361	125.6	124.369	163.32	168.175
YDR169C	66.7783	67.409	87.3076	91.2371	141.587	148.778
YDR169C-A	7.25476	8.20562	16.6509	24.0286	44.0127	43.4746
YDR170C	130.274	134.852	88.2651	98.7445	117.397	116.581
YDR170W-A	69.35	79.9164	64.4172	68.6078	66.22	65.1627
YDR171W	51.9747	61.924	159.855	162.055	147.932	159.041
YDR172W	218.68	215.487	184.026	188.271	225.595	234.31
YDR173C	19.678	20.6869	29.9455	32.0044	42.2017	46.375
YDR174W	320.792	310.285	405.132	366.428	422.356	433.822
YDR175C	93.3767	96.5442	98.6107	104.812	146.015	149.07
YDR176W	43.7943	42.7789	42.2872	45.3456	101.203	114.314
YDR177W	183.678	188.52	217.725	224.619	219.072	233.777
YDR178W	315.901	310.303	305.593	346.347	215.815	225.316
YDR179C	25.5919	27.9394	49.083	42.996	54.7331	63.0116
YDR179W-A	36.8894	36.0764	41.2683	38.9257	75.4481	79.2194
YDR180W	28.4072	28.9723	13.7004	14.4215	50.8935	52.5828
YDR181C	31.843	30.8562	42.1285	41.9587	72.1616	74.164
YDR182W	140.911	136.343	116.181	117.783	141.801	144.319
YDR182W-A	31.6729	32.5811	27.7713	30.3302	44.7824	41.5566
YDR183W	41.7109	42.893	51.9515	52.8768	63.9052	70.811
YDR183C-A	37.6973	53.4319	39.9035	38.8835	65.4243	64.4537
YDR184C	132.415	139.913	123.006	119.464	205.769	203.557
YDR185C	30.606	29.9733	36.6635	42.0501	45.07	42.9312
YDR186C	97.1656	98.1543	125.467	131.843	195.23	201.974
YDR187C	0.393141	1.54152	0.234751	1.15745	0.75635	0.502597
YDR188W	186.55	184.476	124.842	140.753	192.913	193.271
YDR189W	100.847	105.953	92.975	95.0758	135.343	141.847
YDR190C	160.31	160.531	155.971	174.95	196.606	216.061
YDR191W	17.7825	18.4682	29.9937	28.0118	58.7071	61.4035
YDR192C	48.1827	52.6416	54.1806	55.4721	118.622	119.807
YDR193W	0.340919	0.771205	1.37409	1.05389	0.804946	0.572035
YDR194C	152.084	150.971	122.08	118.367	230.912	230.873
YDR194W-A	0	0	1.99078	2.74837	1.16621	0.639333
YDR195W	34.5586	37.6859	49.3959	50.0596	85.5394	89.1067
YDR196C	77.3816	83.1582	94.3135	103.925	93.8845	100.243
YDR197W	62.7234	67.5385	68.7798	72.6506	111.45	109.355
YDR198C	53.3716	52.8237	54.9952	56.2754	90.9744	93.9686
YDR199W	0.371658	1.34518	0	0.65652	0.877524	0.445437
YDR200C	34.5126	35.4673	39.2022	45.939	58.8671	69.6133
YDR201W	55.5852	55.116	59.3276	57.5384	70.8703	83.2173
YDR202C	42.8948	43.3592	58.7834	55.862	63.4304	66.2309
YDR203W	0.855514	0.967644	2.87348	2.83356	5.83544	5.02419
YDR204W	73.1413	78.5151	109.205	110.37	128.123	125.345
YDR205W	82.9294	82.5655	86.0971	92.3583	126.681	125.597
YDR206W	82.6151	89.1723	121.423	125.37	164.922	160.291
YDR207C	39.3833	40.6114	50.9953	53.4209	77.5683	77.1194
YDR208W	110.885	111.091	100.098	105.177	181.266	183.457
YDR209C	0.49285	2.08113	0.441433	1.1608	0.775782	0.47255
YDR210W	316.202	349.549	367.377	355.95	367.19	367.389
YDR210W-B	130.727	137.76	113.729	118.752	101.134	98.7753
YDR210W-A	160.609	162.57	141.401	145.686	113.507	111.459
YDR210C-D	122.638	166.624	64.6066	78.556	58.0269	50.4625
YDR210C-C	120.501	177.463	61.5624	77.1894	56.3746	48.3298
YDR211W	112.465	112.64	105.545	111.634	152.937	156.826
YDR212W	233.755	235.728	175.538	179.857	219.044	212.851
YDR213W	27.7312	29.0429	39.3233	40.683	95.4228	99.3044
YDR214W	289.945	291.229	447.772	455.015	337.441	337.672
YDR215C	1.31427	1.93248	6.18007	6.09421	2.15495	2.12648
YDR216W	16.3355	18.7942	99.4132	100.028	83.2583	78.4941
YDR217C	40.0812	39.4621	30.8154	31.8242	64.1984	69.2773
YDR218C	1.17633	1.83852	2.05933	2.26685	2.18829	2.30703
YDR219C	40.3312	44.902	58.129	51.9073	122.246	127.299
YDR220C	18.2757	18.4208	29.4229	29.8314	50.6158	52.9015
YDR221W	72.2057	72.3682	63.5174	67.2209	122.219	120.637
YDR222W	72.7547	78.1112	86.7883	86.8823	123.9	126.479
YDR223W	2.76123	3.41901	6.85542	6.54626	11.1836	11.8208
YDR224C	807.573	806.886	791.624	752.26	693.263	677.809
YDR225W	867.128	889.353	844.91	823.989	756.381	737.68
YDR226W	508.728	508.711	312.42	298.652	316.319	311.974
YDR227W	29.0938	31.2466	30.2273	32.8426	66.0588	71.554
YDR228C	46.1016	50.0255	80.2198	81.5644	154.886	159.06
YDR229W	44.9927	46.0436	46.2922	48.0308	90.2105	99.7331
YDR230W	0.977203	1.23792	1.40041	1.38096	1.74328	1.21804
YDR231C	45.0121	40.7293	90.7852	90.2045	88.291	87.5824
YDR232W	375.333	373.101	275.036	283.361	316.537	285.97
YDR233C	1023.65	1002.83	835.287	828.69	677.752	648.448
YDR234W	171.765	172.152	167.802	179.609	205.409	198.502
YDR235W	47.2142	49.1208	60.3962	58.9693	99.6806	101.687
YDR236C	99.3802	94.9828	174.594	176.832	188.098	181.144
YDR237W	113.897	109.011	90.8569	93.6269	139.252	142.146
YDR238C	207.881	207.183	172.955	172.217	207.704	209.45
YDR239C	32.0215	34.3116	25.8463	27.6217	52.2911	54.7571
YDR240C	36.6049	34.9529	33.1979	28.797	78.0314	77.1609
YDR241W	36.3683	35.0448	62.3984	55.2742	40.0228	41.6632
YDR242W	19.085	20.0292	50.691	52.3533	47.9273	48.2371
YDR243C	24.6726	25.0766	28.3731	31.6506	51.8426	54.6939
YDR244W	34.8018	32.963	44.9844	46.2868	70.6151	76.1161
YDR245W	205.248	202.693	138.946	133.916	197.903	204.298
YDR246W	89.1387	84.5738	117.405	125.786	162.966	181.754
YDR246W-A	15.2269	22.6573	28.4889	38.5534	46.1609	47.3679
YDR247W	70.1234	70.8667	74.7627	77.9283	115.323	113.603
YDR248C	97.2287	94.428	92.7374	88.2494	85.1067	92.1035
YDR249C	37.9468	40.9732	67.4874	61.999	115.391	113.888
YDR250C	1.72498	2.00681	5.95935	8.27072	6.33555	6.73384
YDR251W	89.5932	89.4126	93.7591	95.1073	126.554	129.652
YDR252W	30.5304	31.1813	54.4199	51.795	79.54	77.4573
YDR253C	13.461	18.9114	27.8149	32.8516	23.4189	30.1152
YDR254W	20.4979	21.1397	37.3824	40.0913	50.2506	53.112
YDR255C	30.1923	31.7919	48.8401	48.9683	91.4136	96.0408
YDR256C	6.10714	6.32119	10.5071	10.9045	15.3763	14.3441
YDR257C	44.8842	45.3381	66.3737	64.2786	102.756	106.337
YDR258C	50.8146	53.3315	116.809	124.681	117.957	125.391
YDR259C	19.2468	21.5825	28.3437	32.9559	75.0582	85.6473
YDR260C	84.851	81.6963	152.591	158.083	172.447	179.174
YDR261C	127.49	124.979	89.0503	94.1797	113.967	113.687
YDR261W-B	112.344	118.312	104.648	107.943	84.0598	82.6963
YDR261W-A	228.983	237.57	213.744	218.848	151.062	149.685
YDR261C-D	75.8388	123.008	38.8027	52.4113	31.8468	24.595
YDR261C-C	115.155	171.648	59.1681	73.0121	44.0747	36.081
YDR262W	129.383	125.639	177.695	171.193	215.379	206.067
YDR263C	18.0948	18.9434	29.7286	28.4329	48.6301	46.4503
YDR264C	179.65	175.375	201.254	203.432	225.918	220.414
YDR265W	38.0982	37.0831	80.3826	80.5101	124.056	129.009
YDR266C	105.987	111.289	111.81	115.387	147.335	148.34
YDR267C	82.8763	83.9774	83.923	91.529	130.13	139.979
YDR268W	44.328	44.699	57.4978	65.341	84.4881	84.4895
YDR269C	0.209918	0.189945	2.44423	1.66865	1.87241	1.50954
YDR270W	40.3794	43.2734	34.8737	42.0202	80.6514	86.268
YDR271C	3.4738	2.15067	18.5046	17.4401	12.375	11.3069
YDR272W	84.9136	88.6953	89.0507	103.25	84.0891	99.1617
YDR273W	5.82264	5.54888	7.60085	8.26121	15.2429	21.0246
YDR274C	1.27982	0.827179	2.2926	1.93779	0.67151	0.701204
YDR275W	61.0967	53.719	89.1396	97.0648	140.526	157.734
YDR276C	1852.55	1835.27	1585.31	1584.03	1081.2	1044.36
YDR277C	20.7906	24.1064	101.576	105.886	145.512	144.147
YDR278C	1.06939	2.32234	0.957827	0.944521	0.33666	0.512673
YDR279W	52.318	54.5872	50.3888	50.2022	67.949	73.2938
YDR280W	123.654	127.174	120.641	126.752	185.038	196.346
YDR281C	167.334	162.159	9.86288	10.298	77.2629	78.9789
YDR282C	27.7516	30.8452	30.1898	34.1129	59.6199	66.2334
YDR283C	38.9233	39.6934	44.0492	46.272	78.9391	79.7734
YDR284C	140.405	144.518	193.046	193.541	171.088	163.292
YDR285W	8.51461	9.41398	16.713	18.1495	33.7713	36.8368
YDR286C	44.7508	46.0228	65.5087	63.3798	78.9229	83.0744
YDR287W	59.6568	59.0216	72.2836	72.7146	92.6455	99.2275
YDR288W	67.3422	66.1983	83.6284	81.8738	121.536	122.844
YDR289C	33.6749	32.5223	39.4727	39.9989	60.8402	69.7715
YDR290W	0.206101	0	0	0.36407	0.324418	0.592836
YDR291W	36.7407	36.8415	45.8296	48.9451	74.6602	78.5407
YDR292C	116.235	116.818	95.0004	97.9945	127.578	134.792
YDR294C	141.329	141.234	113.713	118.752	150.446	146.377
YDR295C	25.8619	28.5677	29.5414	29.4276	71.4777	74.3899
YDR296W	106.464	108.715	126.487	119.702	159.827	168.009
YDR297W	229.626	228.351	220.696	225.869	253.676	238.862
YDR298C	435.115	447.168	414.127	402.169	415.554	398.977
YDR299W	79.0735	81.8261	64.1819	72.4227	119.487	141.069
YDR300C	84.0258	87.4596	59.7818	56.6175	131.431	136.53
YDR301W	46.4274	46.9497	35.6027	39.5021	85.9827	87.0373
YDR302W	127.577	139.589	143.987	142.169	186.702	180.37
YDR303C	64.1751	65.5708	48.9542	49.7432	107.971	108.871
YDR304C	382.099	376.877	326.961	317.635	240.643	235.696
YDR305C	60.6296	69.9171	78.8019	85.8821	112.351	119.755
YDR306C	33.1311	35.118	48.3273	49.0354	83.6646	83.0692
YDR307W	85.3501	88.3063	102.908	103.955	111.794	109.228
YDR308C	152.749	150.873	212.996	196.972	204.92	210.282
YDR309C	181.369	178.323	298.243	290.815	404.906	400.725
YDR310C	64.9422	66.1158	46.0561	48.8635	90.6081	96.5808
YDR311W	45.8006	44.6651	41.7803	39.0512	99.473	102.551
YDR312W	74.1555	66.874	56.8029	58.2191	103.128	114.935
YDR313C	43.9993	44.459	70.6109	71.444	147.344	147.049
YDR314C	18.8435	21.6093	25.9318	29.3279	64.3858	65.3531
YDR315C	18.8122	23.6421	28.4427	28.7577	47.3704	50.9131
YDR316W	41.4036	43.2881	43.3222	56.6352	63.0553	80.0412
YDR316W-B	98.4309	148.972	52.245	65.4652	41.9114	34.1533
YDR316W-A	104.565	179.928	45.1243	59.7991	34.9846	24.6948
YDR317W	6.99254	6.96983	4.74621	4.19777	10.4621	10.8949
YDR318W	25.6202	28.9087	48.261	49.7069	72.5969	76.2574
YDR319C	69.0026	75.8647	123.608	128.808	98.7095	99.5174
YDR320C	49.9849	50.7485	58.9752	67.8835	81.2758	86.3482
YDR320C-A	306.215	287.197	381.362	364.818	292.82	287.35
YDR320W-B	28.0925	43.7038	86.5209	82.7072	71.8891	69.9375
YDR321W	299.65	304.435	258.342	249.407	201.099	194.043
YDR322W	74.9749	78.9902	77.7474	74.9806	103.696	103.518
YDR322C-A	237.229	229.673	215.201	244.415	166.657	188.801
YDR323C	13.4006	13.1592	18.8105	20.4507	48.8722	52.8899
YDR324C	123.889	129.526	94.1077	99.2688	129.608	143.419
YDR325W	40.4185	42.9488	41.9839	44.1066	86.1033	87.0437
YDR326C	133.553	134.574	73.8154	74.6407	127.153	123.641
YDR327W	1.03996	0.752809	0.558879	0.918525	0.436525	0.39885
YDR328C	280.657	271.206	316.564	305.8	261.758	272.72
YDR329C	56.4213	56.9009	64.3174	63.7864	90.103	93.8344
YDR330W	50.2294	52.9025	56.2567	60.3913	96.0411	98.6423
YDR331W	105.047	108.993	127.158	127.093	178.054	178.964
YDR332W	20.2726	22.7438	43.7902	43.5301	62.7349	65.8893
YDR333C	49.8201	48.1117	53.3451	52.8807	120.415	123.458
YDR334W	49.3078	49.6128	25.8817	28.7868	60.4581	65.7213
YDR335W	56.3169	61.3914	51.1046	64.6811	79.451	87.1267
YDR336W	36.3458	34.1249	64.9145	61.915	91.5751	92.4699
YDR337W	98.3468	100.569	91.6243	83.6536	135.366	149.548
YDR338C	36.9057	36.6364	40.8161	42.4931	90.8044	89.8851
YDR339C	160.965	167.459	181.471	171.362	213.364	224.695
YDR340W	0.897866	2.2342	3.41783	1.98256	1.29553	1.18372
YDR341C	265.789	275.927	208.603	214.927	221.394	229.332
YDR342C	303.102	305.807	947.622	978.784	385.858	384.077
YDR343C	3.85131	5.13749	38.4781	41.9764	12.312	10.2786
YDR344C	24.2029	25.7812	42.3955	42.2124	93.7962	85.1868
YDR345C	527.223	532.498	294.865	301.098	332.901	324.089
YDR346C	271.066	269.023	176.603	183.538	249.037	256
YDR347W	173.483	169.846	128.962	128.973	172.667	171.806
YDR348C	109.592	105.442	97.0217	104.965	169.27	174.855
YDR349C	165.457	169.61	242.345	257.593	225.334	224.51
YDR350C	41.2383	42.1661	81.8759	78.2538	124.128	124.807
YDR352W	144.011	149.727	129.945	130.218	175.998	167.883
YDR353W	461.782	455.668	449.776	454.166	367.491	355.847
YDR354W	179.167	180.157	259.767	261.571	258.825	246.185
YDR354C-A	0.472315	0	6.3456	2.92014	3.22165	2.2643
YDR355C	0	0	0.201049	0.396512	0	0.107611
YDR356W	31.7636	31.2812	21.4233	22.9903	49.5449	64.7979
YDR357C	131.05	126.253	208.012	198.936	131.816	144.032
YDR358W	27.5466	25.6977	57.3879	55.1194	83.7789	89.6762
YDR359C	47.6947	51.8381	56.6211	62.8623	120.224	124.774
YDR360W	0.938115	1.13181	1.54045	0.690478	2.29703	1.04939
YDR361C	137.703	140.059	122.05	121.765	123.686	128.664
YDR362C	28.8358	29.3842	31.4697	34.1268	59.7947	65.2766
YDR363W	32.3944	35.5517	39.6788	50.914	57.8628	68.5177
[truncated: 4,694 more rows]
