# Supplementary material for: Decapping factor Dcp2 controls mRNA abundance and translation to adjust metabolism and filamentation to nutrient availability
Source: eLife journal article supplement (doi:10.7554/elife.85545), 2023-06-02
Supplement: fig3-figsupp2-data1 [file Figure 3 – figure supplement 2 – source data 1.xlsx]

## Sheet: Sheet1
CAGE_Seq	gene	baseMean	log2FC mRNA_C dcp2/WT	padj		gene	baseMean	log2FC mRNA_C xrn1/WT	padj		FDR < 0.05	mRNA_C_up_dcp2	FDR < 0.05	mRNA_C_up_xrn1		RNA_Seq	gene	baseMean	log2FC mRNA_T dcp2/WT	padj		gene	baseMean	log2FC mRNA_T xrn1/WT	padj		FDR < 0.05	mRNA_T_up_dcp2	FDR<0.01	mRNA_T_up_xrn1
	Q0045	90.165	-0.832478	0.0218783		Q0045	155.715	-0.78755	0.00961923		FC > 1.5	YPL187W	FC > 1.5	YLL052C			YAL012W	20081.6	-0.442652	9.70562e-19		YAL012W	20081.6	-1.41896	4.30226e-182		FC > 1.5	YCR040W	FC> 1.4	YLL030C
	Q0130	710.272	-0.983214	3.45094e-09		Q0130	901.062	0.112597	0.53087		N=1465	YKL023C-A	N=665	YNR060W			YAL069W	2.07505	0.756052	0.73591		YAL069W	2.07505	-0.425362	0.847723		N=1301	YGL089C	N=1600	YGR259C
	Q0250	2986.96	-0.0430627	0.82963		Q0250	3487.39	-0.396906	0.353984			YGR201C		YCR064C			YAL068W-A	1.83118	-0.238602	0.92929		YAL068W-A	1.83118	-1.47006	0.548363			YPL187W		YFL019C
	YAL001C	291.984	0.69244	0.000229454		YAL001C	251.91	-0.35051	0.0998734			YCL048W-A		YER011W			YAL068C	127.81	0.197864	0.467186		YAL068C	127.81	0.488534	0.0432781			YCL066W		YOR128C
	YAL002W	325.431	0.150423	0.473687		YAL002W	291.731	0.141648	0.54566			YKR061W		YOR313C			YAL067C	440.276	-0.50425	0.000559285		YAL067C	440.276	0.535247	4.75801e-05			YLL030C		YGR289C
	YAL003W	25705.6	-1.01169	2.51947e-18		YAL003W	30806.9	0.31021	0.012436			YKL178C		YBR196C-B			YAL066W	6.65332	0.597716	0.672149		YAL066W	6.65332	1.00501	0.434828			YKL178C		YHL016C
	YAL005C	7063.92	0.847922	3.17223e-08		YAL005C	7022.65	-0.85195	8.16466e-14			YCR045W-A		YIR027C			YAL065C	140.217	1.58839	9.19928e-10		YAL065C	140.217	1.04217	4.53516e-05			YDR194W-A		YBR298C
	YAL007C	3929.96	-0.798483	3.60318e-11		YAL007C	4259.27	0.47436	0.00010965			YKL096C-B		YLR299C-A			YAL064W-B	241.647	1.11282	1.19912e-07		YAL064W-B	241.647	0.586614	0.00499603			YER090C-A		YPL152W-A
	YAL008W	626.506	-0.027284	0.87452		YAL008W	642.56	-0.0671006	0.714228			YHL016C		YPR150W			YAL064C-A	73.2904	1.34974	0.000258235		YAL064C-A	73.2904	0.726983	0.0477013			YGR259C		YOR329W-A
	YAL009W	331.129	-0.112557	0.579067		YAL009W	323.845	0.156206	0.47005			YOL162W		YML104C			YAL064W	63.2921	1.58314	0.000298417		YAL064W	63.2921	2.35032	1.09352e-08			YBR124W		YGR243W
	YAL010C	223.931	0.278314	0.193844		YAL010C	207.02	-0.085612	0.744686			YIR016W		YCL027W			YAL063C-A	123.038	1.10394	2.8655e-05		YAL063C-A	123.038	0.70427	0.00642504			YPL197C		YER068C-A
	YAL011W	133.857	0.0955026	0.721143		YAL011W	123.793	0.108358	0.726723			YOL164W-A		YER138W-A			YAL063C	1183.87	1.74754	8.49063e-75		YAL063C	1183.87	0.992273	1.35514e-25			YCL067C		YOR161W-B
	YAL012W	19151.3	-0.168842	0.173099		YAL012W	16831.9	0.570099	6.31636e-07			YGR174C		YPL165C			YAL062W	958.697	0.086215	0.574443		YAL062W	958.697	-0.731358	4.92817e-08			YCL048W-A		YMR120C
	YAL013W	209.796	0.408091	0.0667904		YAL013W	201.119	-0.320192	0.197468			YPR030W		YLR460C			YAL061W	1703.11	1.67427	4.55784e-50		YAL061W	1703.11	0.712578	2.66324e-10			YNR070W		YHL037C
	YAL014C	1197.58	0.801746	8.73542e-10		YAL014C	1079.94	-0.577626	2.89867e-05			YLL025W		YER087C-A			YAL060W	5649.74	0.660911	5.30731e-34		YAL060W	5649.74	0.579085	8.04817e-28			YDR354C-A		YOR100C
	YAL015C	181.956	1.05633	1.58951e-06		YAL015C	144.978	-0.558226	0.027733			YIR030W-A		YLR213C			YAL059C-A	17.4588	1.12044	0.150035		YAL059C-A	17.4588	-1.38644	0.0913145			YIR041W		YMR018W
	YAL016W	2369.03	-0.307931	0.0151385		YAL016W	2844.37	-0.247573	0.0686067			YFL052W		YLR266C			YAL059W	2418.28	-0.24959	0.00060029		YAL059W	2418.28	-0.204185	0.00325075			YLR458W		YFL041W-A
	YAL017W	337.421	0.0535075	0.79311		YAL017W	336.628	-0.0673271	0.772795			YHR022C		YGL199C			YAL058W	1596.1	-0.154314	0.0559925		YAL058W	1596.1	-0.0581209	0.465522			YPL182C		YHR210C
	YAL018C	29.5885	8.07652	2.48534e-07		YAL018C	14.0018	-7.0071	2.77403e-05			YEL049W		YAL045C			YAL056C-A	23.7049	1.15975	0.0912143		YAL056C-A	23.7049	1.28837	0.0454464			YLR327C		YER066W
	YAL019W	879.859	-0.0142091	0.930347		YAL019W	943.99	-0.203774	0.184485			YNR058W		YJL077W-A			YAL056W	3849.83	-0.178487	0.00377831		YAL056W	3849.83	0.509399	2.24448e-19			YFL063W		YDL094C
	YAL020C	664.285	0.851101	3.25871e-07		YAL020C	584.59	-0.572503	0.00153738			YDR040C		YHR140W			YAL055W	549.857	0.235969	0.143321		YAL055W	549.857	0.394414	0.00707617			YOL166C		YHR022C
	YAL021C	575.304	-0.305862	0.10199		YAL021C	569.036	0.315987	0.0873104			YER015W		YKR015C			YAL054C	1422.88	0.816621	1.48576e-20		YAL054C	1422.88	0.276408	0.00157279			YCL065W		YIL057C
	YAL022C	528.864	0.122476	0.47688		YAL022C	521.093	-0.102475	0.590558			YBR147W		YLR286W-A			YAL053W	15728.6	0.401399	2.15709e-15		YAL053W	15728.6	-0.237975	2.48302e-06			YIL142C-A		YAL064W
	YAL023C	710.311	-1.41896	1.27108e-15		YAL023C	696.923	1.47881	8.82408e-17			YMR303C		YMR007W			YAL051W	3102.34	0.181741	0.00670484		YAL051W	3102.34	0.661443	8.31816e-27			YLR466C-B		YBR018C
	YAL024C	237.069	-0.393008	0.0480203		YAL024C	265.909	0.0128779	0.956593			YLR267W		YDR406W			YAL049C	3336.89	-0.0764481	0.256828		YAL049C	3336.89	-0.362394	1.98705e-09			YDR521W		YJL089W
	YAL025C	1554.36	-0.304989	0.0211235		YAL025C	1584.88	0.21879	0.124824			YML007C-A		YCR102C			YAL048C	1865.39	0.761219	1.76676e-23		YAL048C	1865.39	1.07004	2.49836e-48			YFL013W-A		YOR180C
	YAL026C	772.039	-0.768378	8.55454e-08		YAL026C	825.426	0.494369	0.000780901			YPL152W-A		YHR015W			YAL047W-A	21.0782	1.04445	0.144386		YAL047W-A	21.0782	1.20839	0.0698819			YGL259W		YGL146C
	YAL027W	322.172	0.391666	0.0435549		YAL027W	309.654	-0.309748	0.13534			YMR159C		YPL171C			YAL047C	1116.18	0.143713	0.165602		YAL047C	1116.18	0.520814	1.42263e-08			YDL032W		YPR007C
	YAL028W	116.979	2.95352	2.8773e-21		YAL028W	73.1511	-2.17174	6.76804e-10			YHL024W		YJR074W			YAL046C	989.32	-0.110699	0.329955		YAL046C	989.32	-0.507646	4.60517e-07			YGR243W		YJL106W
	YAL029C	701.471	-0.065148	0.687003		YAL029C	695.933	0.0664787	0.718363			YBR270C		YBR196C-A			YAL045C	7.35303	0.123166	0.927259		YAL045C	7.35303	1.04218	0.34451			YOR100C		YFL052W
	YAL030W	889.036	-1.01021	1.12703e-06		YAL030W	898.439	0.934282	1.82099e-06			YHR157W		YKR012C			YAL044W-A	1430.16	0.35731	2.19354e-05		YAL044W-A	1430.16	-0.457106	2.24882e-08			YGR224W		YPL272C
	YAL031C	549.392	0.726305	3.8738e-06		YAL031C	469.158	-0.360369	0.0375121			YDR154C		YOR186C-A			YAL044C	3459.51	0.0865731	0.187798		YAL044C	3459.51	-0.201592	0.000833382			YER068C-A		YCR095W-A
	YAL032C	125.697	0.0990845	0.723229		YAL032C	135.796	-0.327737	0.226319			YKR073C		YBL106C			YAL043C	4663.52	0.0270735	0.723803		YAL043C	4663.52	0.00254587	0.974201			YGL258W-A		YDR535C
	YAL033W	1191.58	-0.471553	0.000405625		YAL033W	1501.27	-0.245034	0.0839814			YOR161W-A		YHL049C			YAL042C-A	15.0059	1.30971	0.104047		YAL042C-A	15.0059	-0.976747	0.246668			YOR178C		YNL276C
	YAL034C	318.328	1.26077	2.46719e-12		YAL034C	251.836	-0.771788	9.46652e-05			YDL079C		YOR005C			YAL042W	8415.74	-0.455226	2.58816e-17		YAL042W	8415.74	-0.911484	1.72157e-67			YNL335W		YGR236C
	YAL034W-A	277.99	-0.205655	0.295953		YAL034W-A	270.6	0.265509	0.21932			YGR259C		YHR175W			YAL041W	5039.26	-0.245931	1.66558e-05		YAL041W	5039.26	0.51095	1.3e-21			YFL052W		YMR085W
	YAL035W	2140.82	-0.27359	0.0561868		YAL035W	2628.66	-0.334701	0.0250604			YEL041W		YOR053W			YAL040C	13423.6	0.179928	0.00090309		YAL040C	13423.6	-0.0401105	0.481652			YEL049W		YLL059C
	YAL036C	2048.55	-0.477654	9.22497e-05		YAL036C	2369.82	-0.00404436	0.980277			YPL186C		YNL277W			YAL039C	2790.06	-0.169698	0.0252894		YAL039C	2790.06	0.0309145	0.688085			YDR269C		YIL134C-A
	YAL037W	90.9004	0.388477	0.210113		YAL037W	88.2226	-0.331689	0.314021			YJR146W		YOR011W			YAL038W	57491.1	-0.742416	1.00218e-49		YAL038W	57491.1	-1.49332	1.19408e-198			YCR095W-A		YEL030C-A
	YAL038W	62627.4	-1.22306	0.00186414		YAL038W	74980.9	0.465783	0.237575			YDR003W-A		YGR161W-A			YAL037C-B	15.7922	-0.900278	0.259377		YAL037C-B	15.7922	-2.15771	0.00420017			YPL152W-A		YOL118C
	YAL039C	545.132	0.378809	0.0150025		YAL039C	534.634	-0.348145	0.0415429			YDR536W		YGL041C			YAL037C-A	9.01557	1.32115	0.403408		YAL037C-A	9.01557	1.2644	0.391018			YFL014W		YCR020C
	YAL040C	5564.89	0.308389	0.00927997		YAL040C	4469.49	0.301568	0.0140583			YEL033W		YCR081C-A			YAL037W	405.107	0.744874	2.54398e-06		YAL037W	405.107	1.47596	5.68786e-24			YBR298C		YMR206W
	YAL041W	334.05	-0.130583	0.512562		YAL041W	377.923	-0.24056	0.221092			YNL202W		YGR146C-A			YAL036C	3774.77	-0.477556	2.94105e-12		YAL036C	3774.77	-0.462966	2.64227e-12			YGR242W		YNR069C
	YAL042W	3630.76	-0.473399	0.000143811		YAL042W	3776.38	0.316445	0.0151185			YEL009C-A		YER185W			YAL035W	12921.4	-0.764419	1.26193e-33		YAL035W	12921.4	-0.833005	8.93315e-41			YOR329W-A		YFL020C
	YAL043C	190.529	-0.364991	0.0936473		YAL043C	233.483	-0.256126	0.257221			YDL222C		YHR053C			YAL034C-B	7.75207	0.688702	0.590282		YAL034C-B	7.75207	-0.0242821	0.985401			YDR343C		YNL057W
	YAL044C	1552.77	0.25346	0.0859		YAL044C	2045.55	-0.933332	5.24496e-12			YOR186W		YBR277C			YAL034W-A	812.912	-0.170371	0.199125		YAL034W-A	812.912	0.564726	1.32371e-06			YGL118C		YNR068C
	YAL044W-A	4075.58	0.431621	0.000306878		YAL044W-A	3463.8	-0.0163021	0.914077			YJR155W		YMR103C			YAL034C	2659.39	0.774891	8.61445e-29		YAL034C	2659.39	0.866698	7.44931e-38			YOL052C-A		YGR287C
	YAL045C	48.3531	0.0359477	0.941036		YAL045C	23.5994	8.25302	3.54665e-07			YKL086W		YOR032W-A			YAL033W	1612.7	-0.267993	0.00168537		YAL033W	1612.7	-0.4561	1.25424e-08			YHL024W		YDR277C
	YAL046C	448.502	-0.959216	5.9718e-09		YAL046C	500.885	0.505899	0.0028246			YGR109C		YPL095C			YAL032C	1260.4	-0.016538	0.886312		YAL032C	1260.4	0.943416	2.7757e-25			YDR034W-B		YPL282C
	YAL047C	145.877	0.484247	0.0439581		YAL047C	142.4	-0.442964	0.091465			YFL055W		YGR212W			YAL031W-A	16.7176	1.45309	0.0475187		YAL031W-A	16.7176	0.167547	0.832099			YJL022W		YFR026C
	YAL048C	309.796	1.16407	2.14047e-10		YAL048C	254.934	-0.753625	0.000179312			YLL059C		YOR049C			YAL031C	1958.09	0.123594	0.130428		YAL031C	1958.09	0.935575	9.17894e-39			YNL194C		YPR193C
	YAL049C	895.149	-0.365548	0.00918513		YAL049C	1034.37	-0.0951185	0.555231			YER054C		YPR014C			YAL030W	1880.15	-0.368659	7.09328e-07		YAL030W	1880.15	-0.999617	3.36319e-45			YFL061W		YAR023C
	YAL051W	215.355	0.0830599	0.717266		YAL051W	192.581	0.224523	0.366473			YNR069C		YOR200W			YAL029C	7905.91	-0.368972	3.89378e-14		YAL029C	7905.91	-0.221353	3.39158e-06			YPR092W		YOR178C
	YAL053W	2190.99	0.360042	0.00395759		YAL053W	1766.63	0.225322	0.112014			YNL303W		YLL066C			YAL028W	1034.75	1.47297	2.68189e-44		YAL028W	1034.75	1.30779	5.97116e-37			YKL217W		YPL258C
	YAL054C	27.0439	7.94701	3.74064e-07		YAL055W	95.666	-0.135909	0.699875			YLL056C		YFR035C			YAL027W	775.282	0.174486	0.158065		YAL027W	775.282	0.771139	1.09987e-12			YHL016C		YJR152W
	YAL055W	119.931	0.68572	0.0092147		YAL056W	354.905	-0.0983497	0.668975			YLR236C		YPR099C			YAL026C-A	743.587	-0.709571	1.01752e-10		YAL026C-A	743.587	-0.720583	2.57608e-12			YLR331C		YIR020C
	YAL056W	300.822	-0.430404	0.0282085		YAL058W	196.343	0.309236	0.194343			YIL100W		YMR141C			YAL026C	6741.06	-0.608029	5.48927e-38		YAL026C	6741.06	-0.491976	2.9641e-27			YIL101C		YDL162C
	YAL058W	196.08	-0.339326	0.115024		YAL059W	1597.07	0.326456	0.0231111			YNL077W		YPL056C			YAL025C	3530.11	-0.393591	0.0989111		YAL025C	3530.11	-0.392282	0.0924595			YBR141W-A		YOR072W
	YAL059W	1603.54	-0.338742	0.0121207		YAL060W	794.694	-1.02088	6.64593e-13			YJR127C		YML118W			YAL024C	3409.29	-0.859071	3.7596e-32		YAL024C	3409.29	0.606899	6.74641e-19			YIL066W-A		YJR154W
	YAL060W	931.608	1.33592	1.39736e-21		YAL061W	44.9691	0.325243	0.499111			YGL146C		YGL173C			YAL023C	16077.7	-0.847893	9.62065e-67		YAL023C	16077.7	-1.07669	1.25566e-109			YJR004C		YKR103W
	YAL061W	75.6224	1.00975	0.00291745		YAL062W	280.144	1.571	7.77818e-16			YLR312C		YHR055C			YAL022C	5040.92	0.158154	0.0105484		YAL022C	5040.92	-0.208438	0.000452927			YNL067W-A		YMR323W
	YAL062W	313.317	-1.05036	3.47611e-09		YAL063C-A	167.446	-1.0682	5.27007e-06			YIL099W		YCR021C			YAL021C	11167	-0.549885	2.45906e-25		YAL021C	11167	-0.527461	2.62734e-24			YOR055W		YMR084W
	YAL063C-A	370.059	2.5359	2.26268e-41		YAL064W-B	54.4061	-0.301569	0.480062			YGR174W-A		YGR249W			YAL020C	1852.39	0.290723	0.0094914		YAL020C	1852.39	-0.0299268	0.802613			YOR202W		YBR284W
	YAL064W-B	120.229	1.96763	7.78678e-13		YAL067C	62.3046	-0.828478	0.0278994			YDR018C		YHR214C-C			YAL019W-A	44.9461	0.685886	0.145443		YAL019W-A	44.9461	0.239291	0.611437			YIL071W-A		YKR104W
	YAL067C	38.2831	-0.541408	0.231315		YAR002C-A	4831.63	0.569116	0.000166628			YPR026W		YGR052W			YAL019W	6785.98	-0.262723	1.29267e-06		YAL019W	6785.98	0.258322	7.52427e-07			YKL163W		YIL073C
	YAR002C-A	4316.64	-1.04481	1.64164e-11		YAR002W	424.124	0.350649	0.0515716			YOL103W-B		YDL037C			YAL018C	66.2202	-0.339933	0.499442		YAL018C	66.2202	-0.677763	0.128454			YCR104W		YDR018C
	YAR002W	446.5	-0.211423	0.2212		YAR003W	431.025	-1.28252	1.76682e-13			YOL160W		YGR035C			YAL017W	7219.08	0.30408	3.82773e-09		YAL017W	7219.08	0.356985	8.9065e-13			YER006C-A		YDR203W
	YAR003W	251.045	-0.0251445	0.911823		YAR007C	406.396	0.384296	0.0293996			YDL021W		YDR281C			YAL016C-B	2.05551	-3.33646	0.188976		YAL016C-B	2.05551	-0.0742224	0.974201			YFL019C		YHL009W-A
	YAR007C	395.779	-0.500607	0.00295053		YAR008W	407.823	-0.129118	0.518892			YMR084W		YJL052W			YAL016C-A	32.7048	-0.503232	0.396926		YAL016C-A	32.7048	-0.923894	0.082662			YHL045W		YKL220C
	YAR008W	426.166	0.227293	0.19082		YAR014C	920.337	-0.690224	6.21036e-07			YLR004C		YHR216W			YAL016W	5934.4	-0.216021	5.67549e-05		YAL016W	5934.4	0.0168736	0.766666			YDR018C		YGR109C
	YAR014C	836.064	0.439493	0.00177362		YAR015W	1891.02	-1.46795	1.50344e-32			YMR206W		YBR182C-A			YAL015C	1330.9	0.209281	0.0242996		YAL015C	1330.9	-0.0289478	0.763216			YCR020C		YIL028W
	YAR015W	1236.28	0.529719	6.05253e-05		YAR018C	248.454	-0.0377295	0.87911			YNR074C		YPL014W			YAL014C	2523.31	0.713361	1.11881e-25		YAL014C	2523.31	0.781217	2.6422e-32			YDR536W		YMR065W
	YAR018C	239.937	-0.0862915	0.6926		YAR019C	49.4192	-0.0746935	0.875773			YGR127W		YOL085W-A			YAL013W	1847.45	-0.436842	4.96727e-05		YAL013W	1847.45	0.170509	0.107787			YLR334C		YFL050C
	YAR019C	52.5594	0.222545	0.575977		YAR023C	129.188	-1.07307	4.04052e-05			YML054C		YJR047C			YAL011W	954.726	-0.387265	0.000649796		YAL011W	954.726	0.356921	0.000674692			YHR022C		YOR190W
	YAR020C	37.3108	8.41134	5.3906e-08		YAR027W	481.589	0.568007	0.00634871			YOR084W		YIR030C			YAL010C	1697.67	0.357296	1.10758e-05		YAL010C	1697.67	0.74698	7.09366e-23			YOR120W		YAR020C
	YAR023C	197.966	1.89273	4.04654e-17		YAR028W	587.215	0.385654	0.0268995			YJL153C		YOL165C			YAL009W	1246.99	-0.0411	0.683639		YAL009W	1246.99	0.171095	0.0498456			YDR010C		YLR136C
	YAR027W	615.128	0.16708	0.31073		YAR033W	398.392	0.129766	0.513095			YIL046W-A		YDR111C			YAL008W	1304.56	-0.308729	0.00661405		YAL008W	1304.56	-0.547507	2.88647e-07			YOR231C-A		YJR005C-A
	YAR028W	610.732	-0.282224	0.0828622		YAR042W	283.813	0.188096	0.385007			YGL088W		YBL005W-A			YAL007C	4357.96	-0.61971	1.04408e-27		YAL007C	4357.96	-0.826542	1.7647e-51			YJL106W		YER006C-A
	YAR030C	11.122	6.66487	5.43897e-05		YBL001C	2105.09	0.953151	5.08854e-15			YMR095C		YML058W-A			YAL005C	20372.7	-0.14112	0.00392804		YAL005C	20372.7	-0.921823	5.05247e-87			YOR161W-B		YJL113W
	YAR033W	531.16	0.616389	6.89587e-05		YBL002W	10071.2	0.408112	0.000470932			YKL093W		YDR533C			YAL004W	6.23833	0.706891	0.562176		YAL004W	6.23833	-0.300158	0.804411			YCR007C		YNR058W
	YAR042W	323.919	0.171327	0.373232		YBL003C	11725.2	1.20498	4.02815e-23			YNL179C		YLR092W			YAL003W	12173.4	-0.781985	3.30075e-45		YAL003W	12173.4	-1.35145	5.18838e-135			YOL162W		YPR030W
	YAR075W	21.8041	7.63629	1.29038e-06		YBL004W	1132.29	0.415485	0.00512841			YBR296C-A		YNL277W-A			YAL002W	3649.68	0.372991	1.96882e-10		YAL002W	3649.68	0.441005	5.68367e-15			YER066W		YGR225W
	YBL001C	2128.01	-0.939462	5.05741e-11		YBL005W	169.062	0.674069	0.00340584			YOR100C		YJR018W			YAL001C	3046.36	0.0328933	0.659406		YAL001C	3046.36	0.290337	5.16832e-06			YMR095C		YDR169C-A
	YBL002W	9811.86	-0.523763	8.83624e-06		YBL005W-A	189.466	2.30275	5.82538e-24			YNL234W		YFL002W-A			YAR002W	3763.99	0.0397427	0.540663		YAR002W	3763.99	0.0730833	0.219469			YCR108C		YDL214C
	YBL003C	11617.6	-1.28598	6.85582e-25		YBL006C	2097.33	-0.315219	0.017066			YIL163C		YCL007C			YAR002C-A	6743.29	-0.507475	1.58427e-21		YAR002C-A	6743.29	-1.04711	1.71551e-90			YCL023C		YBR277C
	YBL004W	1132	-0.442342	0.00325783		YBL007C	1971.24	0.341553	0.0148571			YAR020C		YJR026W			YAR003W	1807.93	-0.0415657	0.635907		YAR003W	1807.93	0.691062	2.84233e-21			YDL094C		YHL009W-B
	YBL005W	184.428	-0.393129	0.0741282		YBL008W	356.763	-0.0774801	0.717608			YDR223W		YMR245W			YAR007C	3903.58	-0.165718	0.00963333		YAR007C	3903.58	-0.129396	0.0355039			YLR322W		YHL024W
	YBL005W-A	223.701	-1.28945	3.13558e-10		YBL009W	145.424	0.700271	0.00551688			YBR250W		YJL160C			YAR008W	1239.75	-0.0265541	0.83885		YAR008W	1239.75	0.342047	0.0017685			YOL164W-A		YGL259W
	YBL006C	2283.75	0.510806	3.35753e-05		YBL010C	212.313	-0.758901	0.000783916			YNL279W		YOR277C			YAR009C	4422.14	-1.02596	6.1227e-17		YAR009C	4422.14	-1.8551	5.52148e-53			YER054C		YJL022W
	YBL006W-A	11.5268	6.71679	4.21685e-05		YBL011W	731.24	0.761189	4.53073e-07			YDR009W		YMR081C			YAR010C	401.483	-1.34416	0.000231661		YAR010C	401.483	-2.91169	3.32402e-16			YGR289C		YLR318W
	YBL007C	1826.25	-0.632463	2.70494e-07		YBL013W	49.3469	0.515363	0.237758			YLR174W		YFR032C-A			YAR014C	5313.25	0.00613542	0.922567		YAR014C	5313.25	0.400735	2.69841e-15			YCR018C-A		YOR161W-A
	YBL008W	304.617	-0.431366	0.0180147		YBL014C	309.87	0.22313	0.272123			YEL070W		YOR071C			YAR015W	2738.72	0.509198	7.83913e-16		YAR015W	2738.72	0.461765	3.43841e-14			YIL160C		YER078W-A
	YBL009W	137.147	-0.96645	0.000101141		YBL015W	372.846	0.0358714	0.875452			YNL203C		YDR034C-D			YAR018C	1854.37	0.331103	0.000732271		YAR018C	1854.37	0.492906	1.22908e-07			YDR271C		YJL215C
	YBL010C	302.078	1.48315	7.60285e-14		YBL016W	549.996	0.306256	0.0786284			YPR121W		YML123C			YAR019C	2765.37	0.0659633	0.43857		YAR019C	2765.37	0.436892	4.72431e-09			YPR007C		YER175W-A
	YBL011W	750.905	-0.689393	4.01168e-06		YBL017C	692.937	0.4882	0.00290912			YIL024C		YPL222C-A			YAR019W-A	112.921	1.75174	6.19063e-09		YAR019W-A	112.921	1.51741	2.24639e-07			YMR206W		YOL091W
	YBL013W	49.3147	-0.543345	0.16433		YBL018C	1295.06	0.0781882	0.664642			YCR014C		YMR194C-A			YAR020C	163.038	1.59501	7.44156e-10		YAR020C	163.038	1.97343	2.07428e-15			YPL186C		YDL109C
	YBL014C	283.864	-0.53969	0.00347616		YBL019W	80.4254	-0.348884	0.320549			YJR153W		YER060W			YAR023C	371.162	1.52389	1.10014e-20		YAR023C	371.162	2.09574	4.52713e-41			YEL073C		YOR120W
	YBL015W	379.401	-0.00665671	0.973298		YBL020W	1260.37	-0.081206	0.608555			YKL106C-A		YGR260W			YAR027W	2516.81	0.494071	6.0255e-12		YAR027W	2516.81	0.0161115	0.839359			YIL058W		YDR536W
	YBL016W	706.218	0.382733	0.013979		YBL021C	386.132	-0.101938	0.617842			YPL197C		YNL134C			YAR028W	1413.95	-0.228336	0.0107283		YAR028W	1413.95	-0.219597	0.00909898			YCR047W-A		YIR019C
	YBL017C	781.257	-0.124433	0.447805		YBL022C	712.781	-0.457083	0.00222376			YER175W-A		YOR167C			YAR029W	251.619	0.339053	0.0892405		YAR029W	251.619	1.112	2.84307e-10			YIL099W		YLR263W
	YBL018C	1322.29	-0.0386286	0.816732		YBL023C	275.255	0.113618	0.615535			YBL075C		YER072W			YAR030C	103.921	1.42667	7.65113e-07		YAR030C	103.921	0.48812	0.098064			YOL163W		YOR062C
	YBL019W	75.597	0.163695	0.636944		YBL024W	1846.23	0.0495364	0.763583			YLR255C		YOR182C			YAR031W	987.345	-0.287186	0.00518377		YAR031W	987.345	-0.273251	0.00410539			YIL134C-A		YEL049W
	YBL020W	958.828	-0.852864	1.92675e-10		YBL025W	444.09	-0.936364	1.61317e-08			YLR444C		YCL026C-A			YAR033W	940.373	0.437382	2.51902e-05		YAR033W	940.373	0.315929	0.00159674			YFR015C		YNL144C
	YBL021C	418.569	0.299007	0.0853196		YBL026W	1189.23	0.805182	7.06755e-09			YDL094C		YDR316W-A			YAR035W	1116.25	0.966692	4.46153e-18		YAR035W	1116.25	-0.147858	0.208494			YFR017C		YGL249W
	YBL022C	556.089	-0.256602	0.106651		YBL027W	51797.7	0.439784	0.000157872			YLR365W		YLR284C			YAR035C-A	2.86432	-0.262402	0.893271		YAR035C-A	2.86432	-1.41795	0.424203			YNL332W		YJL216C
	YBL023C	255.215	-0.375965	0.0558928		YBL028C	2969.53	0.181755	0.269839			YEL057C		YMR266W			YAR042W	6223.52	-0.151339	0.0113594		YAR042W	6223.52	0.0502079	0.407773			YFL020C		YEL072W
	YBL024W	1513.18	-0.738716	2.38456e-08		YBL029C-A	1319.12	-0.0982834	0.530439			YDL026W		YDR461W			YAR047C	7.68133	-1.67317	0.167809		YAR047C	7.68133	-2.55946	0.0254375			YHL037C		YIL164C
	YBL025W	389.449	0.61909	0.000278231		YBL029W	154.44	-0.250005	0.347418			YAL018C		YLR043C			YAR050W	1339.41	1.44421	2.49194e-50		YAR050W	1339.41	-0.076838	0.473682			YCR089W		YOR318C
	YBL026W	1073.07	-1.29338	1.05521e-16		YBL030C	23408.3	0.430986	0.000373406			YER006C-A		YGR018C			YAR053W	18.1241	2.20825	0.0023932		YAR053W	18.1241	1.63791	0.0223618			YBL048W		YML054C
	YBL027W	43193.7	-1.19172	1.42401e-23		YBL031W	72.2515	0.143238	0.717225			YGR045C		YHR021C			YAR060C	1.50256	-0.220308	0.933462		YAR060C	1.50256	-1.06493	0.654043			YOL046C		YER039C
	YBL028C	2847.83	-0.339529	0.0281623		YBL032W	633.685	0.0742669	0.697596			YGR035W-A		YPR043W			YAR064W	5.00886	1.16161	0.47252		YAR064W	5.00886	0.690718	0.661399			YCR091W		YHR157W
	YBL029C-A	1363.29	0.168121	0.271689		YBL033C	402.627	0.358885	0.0771645			YPR012W		YJR147W			YAR066W	146.586	-0.30893	0.208738		YAR066W	146.586	-0.903257	5.29807e-05			YDR542W		YER039C-A
	YBL029W	119.63	-0.548742	0.0354145		YBL034C	311.456	-0.299939	0.146297			YBR124W		YGL204C			YAR068W	566.936	-0.160752	0.217355		YAR068W	566.936	-1.25586	6.31855e-26			YDL221W		YNL335W
	YBL030C	21449	-0.776568	4.47388e-12		YBL035C	218.287	-0.172428	0.477065			YIL060W		YBR076C-A			YAR069C	16.2897	-0.852753	0.263057		YAR069C	16.2897	-3.10604	9.17975e-05			YER067W		YOL162W
	YBL031W	72.2011	-0.17036	0.620172		YBL036C	575.062	0.348682	0.0305822			YCR050C		YBL086C			YAR070C	19.9362	-2.18423	0.00258275		YAR070C	19.9362	-3.6526	6.95186e-07			YOL118C		YOR202W
	YBL032W	556.183	-0.517782	0.00123207		YBL037W	326.343	-0.0677337	0.774913			YAL054C		YCR005C			YAR071W	740.483	-2.53466	5.48217e-77		YAR071W	740.483	-1.3681	2.7583e-34			YKR058W		YBR141W-A
	YBL033C	491.568	0.209352	0.205919		YBL038W	558.385	0.227996	0.193357			YLR140W		YGR027W-A			YAR073W	208.696	-0.699846	0.000681994		YAR073W	208.696	-2.88589	2.66375e-41			YJL161W		YNR056C
	YBL034C	275.495	-0.0606513	0.774529		YBL039C	2696.28	-0.189462	0.169608			YDR008C		YIL045W			YAR075W	37.3071	0.168676	0.751856		YAR075W	37.3071	-2.42929	2.59607e-06			YGR174W-A		YLR341W
	YBL035C	213.114	0.0847102	0.711143		YBL039W-B	402.656	-0.60438	0.000547094			YNL114C		YLL060C			Q0010	41.6019	0.216822	0.663134		Q0010	41.6019	-1.86748	7.6574e-05			YIL169C		YDR534C
	YBL036C	473.002	-1.12873	4.01861e-13		YBL040C	4268.42	-0.210295	0.158487			YDR250C		YOL114C			Q0017	16.5033	0.859025	0.293658		Q0017	16.5033	-2.84917	0.00354256			YDR216W		YOR351C
	YBL037W	324.83	0.0331628	0.876471		YBL041W	3086.28	-0.013364	0.93541			YLR176C		YPR194C			Q0045	18090.5	-0.49729	3.18422e-16		Q0045	18090.5	-1.19824	4.44941e-89			YNL109W		YOR366W
	YBL038W	691.032	0.352917	0.0193105		YBL042C	2724.76	0.130986	0.402677			YIL066C		YAL062W			Q0070	14407.3	-0.518928	6.22105e-17		Q0070	14407.3	-1.18546	4.56175e-84			YJL133C-A		YGL258W-A
	YBL039C	2079.85	-0.647146	1.32975e-07		YBL043W	126.4	-0.0626746	0.845995			YCR102W-A		YNL259C			Q0065	12352.2	-0.471081	2.27913e-12		Q0065	12352.2	-1.17432	3.76075e-71			YIL100C-A		YLR125W
	YBL039W-B	383.382	0.466336	0.00854138		YBL045C	3829.12	0.197273	0.167531			YER023C-A		YBR201C-A			Q0060	6158.1	-0.386014	4.69092e-07		Q0060	6158.1	-1.14228	4.66499e-53			YEL011W		YIL165C
	YBL040C	4999.22	0.592245	1.14016e-05		YBL046W	190.883	-0.0530671	0.843242			YOR379C		YBR296C			Q0055	14219.4	-0.362985	0.000768712		Q0055	14219.4	-1.30402	5.85797e-36			YPR160W-A		YIL029C
	YBL041W	2992.94	-0.0986613	0.464857		YBL047C	1670.48	0.633896	1.4389e-06			YKL153W		YPR124W			Q0050	16563.6	-0.144826	0.377625		Q0050	16563.6	-1.22943	1.26707e-16			YCR102W-A		YEL009C-A
	YBL042C	2668.41	-0.218843	0.0926529		YBL049W	49.7688	-0.218997	0.629042			YPL223C		YDL086C-A			Q0075	340.755	0.251218	0.1741		Q0075	340.755	-1.39602	1.0907e-15			YKL036C		YBR270C
	YBL043W	185.637	0.986473	7.36044e-06		YBL050W	1768.02	-0.237529	0.0842779			YKL115C		YBR093C			Q0080	15.0338	-0.28726	0.710757		Q0080	15.0338	-2.12775	0.00312697			YLR428C		YIR031C
	YBL045C	3725.49	-0.308563	0.0214485		YBL051C	1340.18	-0.513376	0.000339968			YMR107W		YLL012W			Q0085	196.755	0.198683	0.880169		Q0085	196.755	-1.46693	0.210413			YNL285W		YNL270C
	YBL046W	186.204	-0.0402793	0.868727		YBL052C	260.553	-0.15775	0.496566			YML089C		YLR214W			Q0092	3.02519	0.196506	0.92985		Q0092	3.02519	-3.01557	0.201398			YBL049W		YKR101W
	YBL047C	1500.44	-1.10204	8.84937e-19		YBL054W	351.872	0.565503	0.00207353			YNR002C		YOL103W-A			Q0105	6515.92	-0.380194	0.046442		Q0105	6515.92	-1.27859	1.58871e-12			YIL028W		YLL063C
	YBL049W	209.334	2.99877	1.68728e-33		YBL055C	344.463	0.680786	0.00016769			YMR160W		YMR006C			Q0120	6511.14	-0.361552	0.116136		Q0120	6511.14	-1.25237	6.68502e-09			YHR087W		YMR158C-A
	YBL050W	1578.3	-0.104267	0.455077		YBL056W	1314.32	0.271513	0.0539334			YKR017C		YLR231C			Q0115	4232.56	-0.388063	0.0348819		Q0115	4232.56	-1.27768	2.6123e-13			YNR034W-A		YOR008W-B
	YBL051C	1220.92	0.256285	0.0871347		YBL057C	1132.17	0.372881	0.00732904			YPR064W		YNR044W			Q0110	3607.45	-0.285288	0.213118		Q0110	3607.45	-1.26451	2.46362e-09			YCR010C		YFL061W
	YBL052C	234.757	-0.166279	0.43895		YBL058W	1211.44	-0.12049	0.432933			YDR039C		YDR224C			Q0130	4045.39	-0.180924	0.0281784		Q0130	4045.39	-1.6824	7.05651e-103			YMR323W		YOR161C-C
	YBL054W	343.958	-0.676996	0.000148993		YBL059C-A	1832.43	-0.448877	0.000437135			YML100W-A		YCL019W			Q0140	100.668	-0.059753	0.854323		Q0140	100.668	-1.98766	7.7199e-12			YLR252W		YHL036W
	YBL055C	345.084	-0.702344	6.84059e-05		YBL060W	165.851	-0.528095	0.0304251			YDL221W		YBR228W			Q0142	6.72542	0.678	0.669383		Q0142	6.72542	-2.06476	0.231091			YAR053W		YGL194C
	YBL056W	1133.03	-0.825609	3.0267e-10		YBL061C	465.051	0.0554753	0.783032			YER098W		YNL087W			Q0143	1.93814	-0.838229	0.748814		Q0143	1.93814	-4.47868	0.0854086			YIL072W		YMR117C
	YBL057C	1069.91	-0.594902	8.68835e-05		YBL063W	172.681	-0.809539	0.000433102			YHR180W-A		YAL023C			Q0160	752.293	0.404794	0.00167115		Q0160	752.293	-1.76485	4.28478e-42			YGR292W		YIL046W-A
	YBL058W	1148.66	-0.0530757	0.723765		YBL064C	2006.68	-0.657039	8.01401e-07			YFL020C		YMR046C			Q0182	200.557	-0.542774	0.00794134		Q0182	200.557	-2.58807	2.8912e-35			YIL172C		YGR070W
	YBL059C-A	1737.94	0.293824	0.0233914		YBL066C	410.214	-0.00539075	0.981146			YPL147W		YHR072W-A			Q0250	3959.86	-0.161609	0.0537407		Q0250	3959.86	-1.30129	1.05794e-61			YLL059C		YGR142W
	YBL060W	220.285	1.14828	3.2897e-08		YBL067C	864.809	-0.37749	0.0110233			YGR292W		YDL093W			Q0255	430.102	-0.0848543	0.595891		Q0255	430.102	-1.4639	1.16734e-24			YNR002C		YGR154C
	YBL061C	440.989	-0.240011	0.163279		YBL068W	1991.01	-0.0508166	0.74671			YNL194C		YDR500C			Q0275	7427.82	-0.0660135	0.591793		Q0275	7427.82	-1.39338	1.08253e-37			YCR099C		YER185W
	YBL063W	116.563	-0.246809	0.394879		YBL069W	759.886	0.699797	9.51459e-07			YHR052W-A		YMR116C			Q0297	1171.63	-0.193977	0.0642045		Q0297	1171.63	-2.10033	2.43342e-97			YKL220C		YHR180W
	YBL064C	2185.57	0.836453	4.9183e-10		YBL071W-A	1721.63	-0.533519	6.84278e-05			YGL063C-A		YKL136W			YER054C	868.93	2.51526	1.33947e-89		YER054C	868.93	1.53668	1.01781e-34			YOL165C		YMR030W
	YBL066C	486.134	0.43956	0.00855791		YBL072C	32969.9	0.528144	3.04016e-06			YGR256W		YOL086C			YER114C	4753.1	-0.645989	3.33417e-29		YER114C	4753.1	-0.101236	0.0809745			YMR251W		YDR216W
	YBL067C	544.57	-1.19566	1.94277e-14		YBL074C	126.195	-0.890238	0.000599695			YGR176W		YDR042C			YER169W	2925.32	-0.367246	7.64085e-09		YER169W	2925.32	0.028002	0.675124			YOR318C		YER044C-A
	YBL068W	1775.22	-0.319166	0.0125663		YBL075C	11.9244	-6.77447	6.67121e-05			YAR075W		YBR126W-A			YEL077C	1617.73	0.627976	0.000924704		YEL077C	1617.73	0.660584	0.000383603			YEL009C-A		YFR015C
	YBL069W	732.701	-0.872899	1.99685e-08		YBL076C	3370.78	0.147672	0.295453			YCR047W-A		YJL189W			YEL077W-A	45.0636	1.06999	0.0112981		YEL077W-A	45.0636	-3.06416	3.76952e-09			YJL195C		YJL105W
	YBL071W-A	2382.82	1.24003	7.88437e-23		YBL078C	399.462	-0.47037	0.00703499			YML101C-A		YPL019C			YEL076C-A	34.4618	0.908227	0.0732556		YEL076C-A	34.4618	0.607539	0.218451			YOR008W-B		YBR184W
	YBL072C	27880.7	-1.24708	2.50186e-29		YBL079W	1314.6	-0.0686277	0.688187			YPL248C		YLR411W			YEL076C	115.907	0.397916	0.170374		YEL076C	115.907	0.153919	0.59337			YDR048C		YNL034W
	YBL074C	178.365	1.58675	1.42123e-12		YBL080C	145.467	-0.184862	0.517769			YLR307C-A		YHR092C			YEL075W-A	233.083	0.492895	0.0119236		YEL075W-A	233.083	-1.18948	5.72074e-10			YGL121C		YLR446W
	YBL075C	32.6947	8.22084	1.20781e-07		YBL081W	1580.43	0.426276	0.00155397			YDR510C-A		YDR345C			YEL075C	19.8221	0.711118	0.301764		YEL075C	19.8221	0.683126	0.293357			YFL015C		YJR151C
	YBL076C	2955.37	-0.60954	1.05285e-06		YBL082C	1326.19	-0.227658	0.144156			YFL062W		YDL035C			YEL074W	152.821	1.00507	1.43371e-05		YEL074W	152.821	0.556243	0.015218			YJR153W		YJR036C
	YBL078C	567.325	1.24003	1.05272e-15		YBL084C	233.277	0.161422	0.499543			YBR184W		YIL082W			YEL073C	441.742	2.46644	2.66061e-48		YEL073C	441.742	1.57651	7.0289e-21			YLR444C		YLR307C-A
	YBL079W	1161.37	-0.328693	0.0300686		YBL085W	681.258	0.081817	0.663124			YPL185W		YOL077W-A			YEL072W	741.274	1.76957	2.87979e-55		YEL072W	741.274	1.81325	8.63853e-61			YMR271C		YGR292W
	YBL080C	165.096	0.491806	0.0308288		YBL086C	90.9907	1.63166	3.71454e-08			YFR026C		YJL205C			YEL071W	10239.2	-0.394128	5.47699e-16		YEL071W	10239.2	-0.794904	3.66798e-63			YJR005C-A		YJR021C
	YBL081W	1468.15	-0.718136	7.05637e-08		YBL087C	10869.8	0.93533	1.30249e-08			YKL217W		YPR091C			YEL070W	270.187	1.93938	1.08924e-19		YEL070W	270.187	0.553524	0.0120144			YBR147W		YLR030W
	YBL082C	1357.29	0.269534	0.0649629		YBL088C	209.876	-0.666025	0.00207951			YFR006W		YBR010W			YEL069C	79.607	1.63587	0.00272598		YEL069C	79.607	0.901518	0.0949003			YER121W		YJL114W
	YBL084C	257.259	0.102834	0.628479		YBL089W	531.645	-0.272324	0.117133			YBR033W		YIL156W-B			YEL068C	640.263	0.0873809	0.495109		YEL068C	640.263	0.0878005	0.466272			YPL148C		YER184C
	YBL085W	766.564	0.227983	0.127586		YBL090W	2029.52	-0.0014228	0.995609			YCR025C		YFL024C			YEL067C	287.138	0.898669	1.11985e-07		YEL067C	287.138	0.854871	1.60306e-07			YIR039C		YHR014W
	YBL086C	101.763	-1.09458	5.89258e-05		YBL091C	810.316	-0.0794936	0.708608			YCL020W		YGL030W			YEL066W	815.909	-0.107597	0.376931		YEL066W	815.909	-0.334178	0.00218109			YER078W-A		YMR204C
	YBL087C	9494.16	-1.64063	3.11027e-19		YBL091C-A	497.629	-1.03058	1.82976e-10			YLR031W		YHR097C			YEL065W	6386.58	1.04218	2.0691e-80		YEL065W	6386.58	0.120979	0.0334966			YIL057C		YGR066C
	YBL088C	235.107	0.906727	9.27256e-06		YBL092W	68275.9	0.835696	3.94336e-14			YHR056W-A		YOL152W			YEL064C	1506.03	0.414271	1.80724e-06		YEL064C	1506.03	0.873608	1.52331e-26			YDR119W-A		YJR095W
	YBL089W	580.065	0.475834	0.00180734		YBL093C	993.327	0.623905	1.33005e-05			YJL113W		YNL331C			YEL063C	7498.62	0.966353	2.73604e-77		YEL063C	7498.62	0.734216	3.1153e-46			YLR307C-A		YER067W
	YBL090W	2293.26	0.314994	0.0122764		YBL095W	281.455	0.387816	0.0592364			YLR374C		YJL047C-A			YEL062W	1795.47	0.276179	0.000891144		YEL062W	1795.47	0.952276	2.4082e-35			YPL250C		YCR007C
	YBL091C	759.74	-0.131034	0.508474		YBL097W	68.1142	-0.253308	0.508674			YNR064C		YOR343C			YEL061C	2339.07	-0.412203	6.24877e-08		YEL061C	2339.07	0.74526	5.09637e-26			YOR161W-A		YDR019C
	YBL091C-A	467.439	0.876841	6.02801e-08		YBL098W	341.219	1.13429	6.43579e-09			YOR329W-A		YLL028W			YEL060C	10591.5	0.547731	2.23962e-19		YEL060C	10591.5	-0.406144	2.11269e-11			YPR160W		YOL164W
	YBL092W	58498	-1.61343	1.49948e-39		YBL099W	5806.28	0.900983	0.00922127			YKR033C		YLR388W			YEL059C-A	803.427	0.0437115	0.715479		YEL059C-A	803.427	-0.510193	6.39267e-07			YML084W		YFL055W
	YBL093C	982.608	-0.693228	5.23415e-07		YBL100W-A	24.0038	-0.00259711	0.998165			YNL285W		YJR103W			YEL059W	38.7912	0.6771	0.183929		YEL059W	38.7912	0.152334	0.766983			YBR033W		YBR250W
	YBL095W	346.074	0.206493	0.297218		YBL101C	278.308	-0.343262	0.0951656			YJR036C		YIL121W			YEL058W	7134.95	-0.0915337	0.101877		YEL058W	7134.95	-0.474205	3.37233e-20			YKL026C		YEL073C
	YBL097W	69.3145	0.279766	0.417454		YBL102W	324.045	0.0390866	0.870194			YGR224W		YOR236W			YEL057C	230.882	0.327875	0.110033		YEL057C	230.882	0.960128	1.27508e-07			YKR097W		YKL217W
	YBL098W	302.509	-1.83267	3.92611e-18		YBL103C	318.549	-0.529592	0.0072019			YHL006W-A		YMR173W			YEL056W	2216.25	-0.0818013	0.27532		YEL056W	2216.25	0.208593	0.00194101			YLR037C		YJL107C
	YBL099W	5911.78	-0.860277	5.87456e-06		YBL104C	126.534	0.125465	0.686892			YKL162C		YLR262C-A			YEL055C	6357.11	-0.718243	1.86268e-42		YEL055C	6357.11	-0.4021	4.32184e-15			YCR101C		YEL023C
	YBL100W-A	40.1265	1.20584	0.0119576		YBL105C	840.68	-0.361923	0.0151185			YER188C-A		YMR215W			YEL054C	8484.53	-0.651393	1.11603e-34		YEL054C	8484.53	-1.16908	8.76071e-112			YOR186W		YEL041W
	YBL101C	222.31	-0.324324	0.115702		YBL106C	15.0062	7.59212	4.83008e-06			YCR085W		YDL146W			YEL053W-A	9.9123	-0.11751	0.913748		YEL053W-A	9.9123	-1.9445	0.0465691			YNL276C		YBL096C
	YBL102W	458.51	0.825386	5.75016e-07		YBL107C	1263.88	0.0622106	0.707043			YBR299W		YDR155C			YEL053C	3024.75	-0.0594034	0.364421		YEL053C	3024.75	0.154992	0.00835765			YMR189W		YLL057C
	YBL103C	456.012	1.30607	2.25747e-15		YBR001C	262.497	0.330481	0.141894			YBR056C-B		YBR051W			YEL052W	3009.65	0.155522	0.0145597		YEL052W	3009.65	-0.061438	0.336707			YLR040C		YMR198W
	YBL104C	136.933	0.0824788	0.758226		YBR002C	613.859	-0.345455	0.0335698			YHL037C		YKL038W			YEL051W	3871.89	-0.823561	1.36476e-44		YEL051W	3871.89	-1.31728	5.34589e-118			YNR069C		YBR147W
	YBL105C	805.361	0.229485	0.120594		YBR003W	1437.74	-0.743897	9.03809e-09			YGL069C		YFL004W			YEL050W-A	3.12872	3.15403	0.150663		YEL050W-A	3.12872	3.15046	0.1273			YCL048W		YJR155W
	YBL106C	15.1203	-7.61473	2.28309e-06		YBR004C	990.183	0.0660201	0.698855			YDL156W		YPR157W			YEL050C	2942.67	-0.35676	1.44425e-08		YEL050C	2942.67	-0.447727	9.30806e-14			YGR248W		YLR156W
	YBL107C	1190.97	-0.267432	0.0469501		YBR005W	1028.44	0.232549	0.190424			YLR076C		YJL101C			YEL049W	138.468	3.17663	8.77758e-26		YEL049W	138.468	1.84446	1.36014e-09			YNL202W		YOR028C
	YBR001C	335.063	0.351695	0.080176		YBR006W	203.176	0.165597	0.500654			YDR246W-A		YJR143C			YEL048C	469.184	0.90185	8.46168e-11		YEL048C	469.184	1.36794	4.6256e-25			YLR312C		YCR006C
	YBR002C	561.149	0.0840231	0.623786		YBR007C	148.965	-0.505063	0.0457495			YJL211C		YCL005W-A			YEL047C	4398.44	-0.389222	2.0628e-11		YEL047C	4398.44	-0.861785	1.5183e-53			YDR535C		YLR174W
	YBR003W	964.826	-0.355978	0.00961753		YBR008C	459.516	-0.810734	1.43356e-05			YJL027C		YGL098W			YEL046C	14178.4	-0.0309183	0.621738		YEL046C	14178.4	-0.39954	4.15273e-13			YJL077C		YKR075C
	YBR004C	923.809	-0.303276	0.0323511		YBR009C	10529.4	0.593161	1.21248e-05			YCR024C-B		YOR272W			YEL045C	1308.38	0.0416063	0.674119		YEL045C	1308.38	-0.656617	1.52353e-14			YCR100C		YHR199C-A
	YBR005W	1493	0.738316	1.12812e-06		YBR010W	5798.97	1.3671	7.62698e-23			YCR107W		YNL024C			YEL044W	1113.3	-0.128577	0.177985		YEL044W	1113.3	-0.430856	5.98642e-07			YKL161C		YPL167C
	YBR006W	231.875	0.191082	0.368498		YBR011C	13165.2	0.468586	6.60174e-05			YCR020C		YGR144W			YEL043W	4265	-0.359141	2.63103e-09		YEL043W	4265	-0.057047	0.361542			YJR128W		YPR153W
	YBR007C	170.697	0.808747	0.000326995		YBR014C	921.993	0.0424691	0.805594			YPR001W		YOR192C-B			YEL042W	7788.25	-0.902277	1.73115e-76		YEL042W	7788.25	-1.09877	6.15139e-118			YIL177W-A		YPL148C
	YBR008C	687.337	1.62534	3.75563e-22		YBR015C	3553.63	0.0186597	0.913799			YDR048C		YBR169C			YEL041W	576.672	1.49184	4.59989e-30		YEL041W	576.672	1.56536	4.51215e-35			YBR043C		YER054C
	YBR009C	11853.6	-0.220663	0.0925981		YBR016W	1559.11	0.166299	0.244761			YGL041C-B		YJR025C			YEL040W	17297.7	-0.443324	1.04088e-20		YEL040W	17297.7	-0.394348	3.80592e-17			YMR105C		YDR271C
	YBR010W	6511.3	-0.870862	2.79148e-08		YBR017C	971.034	0.00744162	0.965258			YDR114C		YKL006W			YEL039C	1990.98	1.82017	7.3871e-90		YEL039C	1990.98	0.780253	7.67978e-18			YJR154W		YMR068W
	YBR011C	10762.6	-1.33111	1.93552e-31		YBR021W	239.473	0.0795006	0.747343			YNL013C		YGL226C-A			YEL038W	1908.64	-0.324001	2.63715e-05		YEL038W	1908.64	-0.810958	1.78284e-28			YDR277C		YBL074C
	YBR014C	1068.49	0.34119	0.0233914		YBR022W	726.708	-0.39694	0.00916252			YEL045C		YFL012W			YEL037C	4794.98	-0.616084	1.1175e-26		YEL037C	4794.98	-0.452523	4.99399e-16			YPL258C		YIR013C
	YBR015C	2685.95	-1.02806	2.81238e-13		YBR023C	2229.53	-0.129074	0.426414			YGR230W		YNL144C			YEL036C	4474.19	-0.339441	4.98002e-10		YEL036C	4474.19	-0.227394	1.66835e-05			YCR006C		YBR020W
	YBR016W	1603.08	-0.105271	0.445284		YBR024W	151.936	0.0657583	0.832242			YDL024C		YLR121C			YEL035C	11.1694	-0.36633	0.710663		YEL035C	11.1694	-0.849066	0.33922			YMR169C		YIL024C
	YBR017C	876.718	-0.344794	0.0153122		YBR025C	6200.66	0.31324	0.00863133			YLR317W		YBL003C			YEL034C-A	19.8755	-0.462272	0.521905		YEL034C-A	19.8755	-0.93637	0.153129			YML042W		YDR082W
	YBR018C	9.43045	6.42721	0.00011808		YBR026C	868.796	-0.123368	0.466945			YCR087W		YPR132W			YEL034W	25091	-0.662522	1.6382e-36		YEL034W	25091	-1.23658	1.37148e-125			YGR154C		YPR005C
	YBR021W	341.953	0.813567	3.60021e-06		YBR028C	735.154	-0.131088	0.440542			YPR126C		YDL232W			YEL033W	8797.63	-0.548286	6.47266e-17		YEL033W	8797.63	-1.14561	1.00495e-70			YGR236C		YJR039W
	YBR022W	721.095	0.357675	0.0162881		YBR029C	700.288	0.633618	1.84805e-05			YBR300C		YGL255W			YEL032W	5580.47	-0.100229	0.123122		YEL032W	5580.47	0.314617	1.40791e-07			YFR052C-A		YAR019W-A
	YBR023C	2478.28	0.388657	0.00251296		YBR030W	531.029	-0.596299	0.000181235			YNR056C		YOR032C			YEL031W	17637.2	-0.894867	1.15054e-65		YEL031W	17637.2	-1.12908	5.27217e-106			YLR149C		YGL175C
	YBR024W	140.537	-0.329396	0.181733		YBR031W	19199.2	0.635456	9.69161e-08			YBL006W-A		YHR179W			YEL030C-A	15.8767	1.94084	0.0177023		YEL030C-A	15.8767	2.21451	0.00445619			YCR045W-A		YJL153C
	YBR025C	5240.6	-0.960745	7.48599e-18		YBR034C	2182.42	0.146587	0.31498			YOR364W		YGR209C			YEL030W	902.406	0.734148	1.37027e-12		YEL030W	902.406	0.942732	2.91738e-21			YML057C-A		YNR059W
	YBR026C	943.786	0.324199	0.0217412		YBR035C	1634.73	-0.00714136	0.965412			YLR062C		YPR149W			YEL029C	1763.23	-0.0839541	0.317229		YEL029C	1763.23	0.0973207	0.21201			YHL009W-A		YIL077C
	YBR028C	709.146	0.00793008	0.964772		YBR036C	1700.94	0.0530865	0.737798			YAR030C		YOL039W			YEL028W	431.829	1.62962	1.06758e-30		YEL028W	431.829	1.41249	1.92651e-24			YPR193C		YBR043C
	YBR029C	779.13	-0.293445	0.0699663		YBR037C	539.948	-0.38086	0.0198647			YOR268C		YKL198C			YEL027W	8236.21	-0.449442	1.14792e-18		YEL027W	8236.21	-1.47038	2.36372e-189			YER185W		YOR381W
	YBR030W	560.922	0.707809	3.58446e-06		YBR038W	1050.76	0.262265	0.0844986			YJL135W		YER130C			YEL026W	5642.89	-0.643313	5.14628e-33		YEL026W	5642.89	-1.24229	8.27249e-124			YDL096C		YLR416C
	YBR031W	17000.7	-1.16933	3.80188e-23		YBR039W	3515.19	0.125451	0.366777			YHR136C		YPR052C			YEL025C	3348.3	0.290928	1.07169e-05		YEL025C	3348.3	0.792619	1.21438e-36			YBR089W		YLR233C
	YBR033W	18.8505	7.42656	3.14183e-06		YBR041W	1038.04	0.80249	2.43459e-09			YNL009W		YMR244C-A			YEL024W	5520.6	0.00303253	0.964467		YEL024W	5520.6	-0.539976	5.03927e-22			YLR281C		YKL050C
	YBR034C	1900.5	-0.63314	1.00362e-06		YBR042C	739.484	0.280499	0.0703225			YHR139C		YDR276C			YEL023C	873.778	1.25122	3.35787e-30		YEL023C	873.778	1.56577	2.20844e-49			YFL058W		YIR042C
	YBR035C	1435.39	-0.420337	0.00214381		YBR043C	728.76	-1.31311	7.82996e-20			YDR285W		YCR034W			YEL022W	5956.72	-0.580257	2.33177e-29		YEL022W	5956.72	-0.118272	0.0210965			YMR046W-A		YPR196W
	YBR036C	2150.43	0.550076	3.66226e-05		YBR044C	185.047	-0.0806289	0.76559			YNR070W		YOR273C			YEL021W	2413.51	-0.490331	1.86087e-09		YEL021W	2413.51	-0.510737	8.52062e-11			YLR286W-A		YOR242C
	YBR037C	573.522	0.51268	0.00115454		YBR046C	292.77	0.0235477	0.91796			YJL195C		YDL130W			YEL020C-B	8.9328	-1.19572	0.264786		YEL020C-B	8.9328	-2.81572	0.00780499			YBR051W		YBR138C
	YBR038W	1132.67	-0.0559434	0.704963		YBR047W	123.097	0.183337	0.541089			YKL165C-A		YLR146W-A			YEL020W-A	2568.54	-0.158839	0.0206981		YEL020W-A	2568.54	-0.806488	2.23988e-36			YDL204W		YPL113C
	YBR039W	2902.22	-0.810047	7.63567e-11		YBR048W	69235.3	0.869977	4.24932e-11			YDR501W		YDR424C			YEL020C	1303.6	0.242088	0.00622558		YEL020C	1303.6	0.67775	7.45638e-17			YLR053C		YLR111W
	YBR041W	923.983	-1.35922	9.56841e-24		YBR049C	424.931	-0.145557	0.456798			YLR101C		YBL098W			YEL019C	522.61	0.266393	0.0549119		YEL019C	522.61	0.817876	6.16228e-11			YOR009W		YLR161W
	YBR042C	564.631	-1.38987	9.62178e-21		YBR051W	43.3755	1.2738	0.00263462			YPR201W		YLR287C-A			YEL018C-A	7.44449	-0.695712	0.587024		YEL018C-A	7.44449	-1.30551	0.257706			YJL114W		YML037C
	YBR043C	1695.02	2.81596	7.04927e-105		YBR052C	1279.51	0.286828	0.0635868			YDL025W-A		YMR274C			YEL018W	753.587	-0.170422	0.252714		YEL018W	753.587	0.240226	0.0817193			YLR251W		YAL037W
	YBR044C	190.618	0.141029	0.54863		YBR053C	784.442	-0.813194	6.65978e-08			YNL335W		YKR066C			YEL017C-A	2613.64	-1.04548	3.56392e-54		YEL017C-A	2613.64	-1.43301	1.96952e-107			YDL187C		YPL281C
	YBR046C	319.869	0.202379	0.304583		YBR054W	3263.72	0.770144	1.82976e-10			YLR322W		YLR167W			YEL017W	3345.82	-0.0962856	0.145842		YEL017W	3345.82	-0.538149	4.13858e-19			YIR020C		YFL064C
	YBR047W	180.662	0.798955	0.000241272		YBR055C	352.94	-0.768564	1.28697e-05			YFL061W		YER007W			YEL016C	1370.73	0.721285	2.81216e-19		YEL016C	1370.73	0.754428	2.6847e-22			YPL230W		YDR124W
	YBR048W	63129.9	-1.32041	1.92337e-22		YBR056C-B	12.6477	-6.86217	4.52602e-05			YPL192C		YGR221C			YEL015W	3951.73	-0.0013608	0.984984		YEL015W	3951.73	0.148383	0.0250318			YML090W		YER173W
	YBR049C	390.257	-0.120526	0.511918		YBR056W	470.686	0.158595	0.412826			YBR018C		YMR316W			YEL014C	4.54856	2.48977	0.124062		YEL014C	4.54856	-0.167918	0.928347			YGR070W		YOL165C
	YBR051W	75.2057	0.523613	0.109737		YBR056W-A	783.7	0.0542732	0.779544			YKR106W		YJL190C			YEL013W	7097.42	-0.26294	9.53469e-08		YEL013W	7097.42	-0.243299	3.55783e-07			YHL042W		YKL221W
	YBR052C	1437.9	0.0423442	0.789169		YBR057C	508.448	-0.39107	0.0222488			YPR092W		YER007C-A			YEL012W	1022.93	0.397852	0.000643614		YEL012W	1022.93	0.217579	0.0568045			YOL085C		YNL289W
	YBR053C	807.217	0.860558	2.03769e-09		YBR058C	630.451	-0.0804215	0.67003			YKL131W		YDR492W			YEL011W	4007.62	2.29413	8.53835e-225		YEL011W	4007.62	1.70441	3.54872e-127			YEL030C-A		YOR381W-A
	YBR054W	2916.91	-1.29639	2.1792e-28		YBR058C-A	5670.98	0.578333	9.79515e-07			YFL060C		YPR002C-A			YEL010W	2.30716	1.48618	0.488695		YEL010W	2.30716	0.629205	0.769011			YLR280C		YDL242W
	YBR055C	351.979	0.744718	2.08302e-05		YBR059C	725.985	-0.103672	0.565587			YOR105W		YER019C-A			YEL009C-A	67.7916	2.15754	1.35722e-08		YEL009C-A	67.7916	1.73299	3.45651e-06			YEL070W		YBR099C
	YBR056C-B	15.3189	7.12677	1.00184e-05		YBR060C	206.081	0.192755	0.435395			YEL059W		YDR320C-A			YEL009C	11214.8	-0.13775	0.0108986		YEL009C	11214.8	-0.41683	5.00646e-16			YDL245C		YIR018W
	YBR056W	475.469	-0.150375	0.401736		YBR061C	513.182	0.299114	0.0777313			YDR524C-A		YJL048C			YEL008W	38.9076	0.31656	0.539535		YEL008W	38.9076	-1.70497	0.00047179			YHL009W-B		YER024W
	YBR056W-A	854.026	0.167997	0.304068		YBR062C	267.487	0.31645	0.132403			YIL013C		YER158C			YEL008C-A	338.954	1.1199	3.88186e-12		YEL008C-A	338.954	0.4475	0.00567949			YDR007W		YPL236C
	YBR057C	538.905	0.516751	0.000887082		YBR065C	692.82	-0.892359	1.05356e-09			YLL057C		YCR061W			YEL007W	6827.6	0.134706	0.0158649		YEL007W	6827.6	0.510977	1.19228e-22			YJL113W		YOL163W
	YBR058C	628.546	0.0498263	0.770921		YBR066C	194.865	0.556591	0.0115267			YGR287C		YDL061C			YEL006W	2208.06	0.382749	9.62152e-08		YEL006W	2208.06	0.575533	5.64927e-17			YGL146C		YDR076W
	YBR058C-A	6503.08	-0.151485	0.212499		YBR067C	5907.92	0.0798104	0.571528			YOR177C		YMR296C			YEL005C	993.622	0.871678	8.0629e-20		YEL005C	993.622	0.78401	2.41938e-17			YNR068C		YOR192C
	YBR059C	816.275	0.395471	0.00678634		YBR068C	3003.26	0.52583	1.94515e-05			YKR097W		YDL133C-A			YEL004W	843.194	0.242098	0.0217296		YEL004W	843.194	0.491447	3.98092e-07			YMR107W		YFR017C
	YBR060C	248.532	0.315614	0.153019		YBR069C	2838.46	0.398995	0.00222296			YBR103C-A		YPR195C			YEL003W	1564.76	0.138902	0.0881095		YEL003W	1564.76	-0.461943	7.84575e-10			YGR161C		YGR174W-A
	YBR061C	585.036	0.0712148	0.670378		YBR070C	1036.03	-0.0724397	0.667828			YLR327C		YLR297W			YEL002C	6751.97	-0.637859	6.91335e-29		YEL002C	6751.97	-0.851619	1.80963e-52			YLR374C		YIR029W
	YBR062C	323.314	0.216665	0.255523		YBR071W	1055.83	-0.526517	0.000256333			YOL083C-A		YBR162C			YEL001C	6000.85	-0.338334	8.20046e-09		YEL001C	6000.85	-1.06299	1.10967e-77			YIR030W-A		YFR054C
	YBR065C	853.125	1.31629	1.7961e-19		YBR072W	203.214	-1.59129	6.54419e-11			YPR076W		YDL075W			YER001W	7243.95	-0.844144	6.48586e-71		YER001W	7243.95	-0.559041	5.0678e-34			YHR096C		YNR034W
	YBR066C	333.201	0.888764	4.81763e-07		YBR073W	822.502	-0.0512072	0.775693			YLR037C		YJL012C			YER002W	2881.03	-0.597209	0.00590948		YER002W	2881.03	-0.761166	0.00031806			YNL057W		YLR281C
	YBR067C	7310.69	0.475193	0.000505613		YBR074W	1415.18	0.463573	0.000446965			YPL025C		YJR009C			YER003C	5262.46	-0.613933	1.88643e-28		YER003C	5262.46	-1.08506	6.62014e-90			YJL153C		YDR285W
	YBR068C	3861.55	0.217032	0.0708489		YBR076C-A	48.9256	1.63784	7.13681e-05			YNL334C		YGR197C			YER004W	3385.5	-0.472872	4.07992e-14		YER004W	3385.5	-0.784234	1.14303e-38			YOR134W		YDR259C
	YBR069C	3452.47	0.166357	0.245985		YBR077C	1274.53	-0.446985	0.00211063			YOL035C		YPR169W-A			YER005W	3228.8	-0.182064	0.00382646		YER005W	3228.8	0.430954	1.60729e-13			YOL126C		YDL239C
	YBR070C	1185.37	0.410966	0.00262901		YBR078W	15039.9	0.46696	0.000217359			YJR023C		YHR183W			YER006W	4956.72	-0.581185	2.2897e-25		YER006W	4956.72	-0.665656	6.12892e-35			YPL272C		YBR224W
	YBR071W	1792.49	1.63703	1.03648e-32		YBR079C	694.752	0.0699952	0.703696			YCR022C		YLR346C			YER006C-A	46.8145	2.67621	3.54514e-08		YER006C-A	46.8145	1.96384	4.44303e-05			YJL144W		YBR295W
	YBR072W	303.913	2.3119	1.39661e-23		YBR080C	1207.23	0.117117	0.463427			YBR178W		YLL015W			YER007W	366.723	-0.049037	0.805191		YER007W	366.723	0.364006	0.0316276			YHL050W-A		YHL047C
	YBR073W	972.53	0.473746	0.000607729		YBR081C	272.681	-0.77514	0.000109143			YPL054W		YDL081C			YER007C-A	2053.88	-0.385985	2.37323e-08		YER007C-A	2053.88	-0.858774	1.52635e-38			YHR028W-A		YBR223C
	YBR074W	1353.31	-0.649954	1.34631e-06		YBR082C	7053.26	0.381012	0.00126866			YIR020C-B		YGL076C			YER008C	5125	-0.77493	1.95886e-36		YER008C	5125	-0.331491	3.4414e-08			YER175W-A		YEL028W
	YBR076C-A	65.6574	-0.388775	0.293296		YBR083W	369.909	-0.330462	0.0890976			YGR243W		YOR321W			YER009W	4680.17	-0.429351	3.24504e-11		YER009W	4680.17	-1.36919	4.01154e-104			YFR026C		YNL014W
	YBR077C	1539.62	0.874874	4.38344e-11		YBR084C-A	39578.3	0.215543	0.0863242			YGL089C		YDR033W			YER010C	2078.53	0.142376	0.0650518		YER010C	2078.53	-0.379251	1.29321e-07			YBL094C		YCR099C
	YBR078W	13041.4	-1.04889	2.12756e-14		YBR084W	1983.7	-0.115605	0.456323			YDR216W		YDR382W			YER011W	670.363	-0.78241	2.2351e-11		YER011W	670.363	-3.08667	4.22437e-127			YOR351C		YOR376W-A
	YBR079C	528.476	-1.07763	1.18555e-11		YBR085C-A	5370.14	-0.417375	0.00762578			YFL014W		YGR254W			YER012W	3628.27	-0.20825	0.000932332		YER012W	3628.27	-0.591698	2.50778e-23			YIL082W-A		YCR014C
	YBR080C	1102.39	-0.43059	0.00169093		YBR085W	212.035	0.550836	0.00973194			YFL011W		YML085C			YER013W	2164.34	-0.343882	7.35355e-05		YER013W	2164.34	0.701643	2.88607e-18			YNR058W		YPL201C
	YBR081C	270.832	0.741862	0.000505719		YBR086C	2416.78	0.939282	1.19897e-14			YFR017C		YKL056C			YER014W	1563.09	-0.0632106	0.480624		YER014W	1563.09	-0.445665	1.22609e-08			YFL055W		YOR054C
	YBR082C	7216.2	-0.331186	0.00446512		YBR087W	611.756	-0.399394	0.0144799			YPL230W		YGR187C			YER014C-A	31.4641	-1.20887	0.0308755		YER014C-A	31.4641	0.743526	0.129324			YDR019C		YER076C
	YBR083W	538.894	1.17951	9.63859e-14		YBR088C	1987.81	0.0412283	0.795902			YNL097W-A		YDR034W-B			YER015W	1161.97	0.684341	1.31239e-13		YER015W	1161.97	0.723943	4.79161e-16			YLR174W		YOL126C
	YBR084C-A	29022.7	-1.49564	1.08117e-36		YBR089C-A	2279.97	0.425449	0.00620082			YHR033W		YJR135W-A			YER016W	1856.58	-0.363736	0.000282085		YER016W	1856.58	-0.00309379	0.978202			YIL029C		YOR186W
	YBR084W	1404.89	-1.10669	2.62567e-16		YBR091C	1203.36	0.0420071	0.855189			YNL270C		YIL052C			YER017C	4756.54	0.111384	0.0810087		YER017C	4756.54	0.0254894	0.697816			YFR053C		YCR045W-A
	YBR085C-A	8732.89	1.47025	1.2519e-23		YBR092C	1507.23	0.164696	0.267588			YIL101C		YLR230W			YER018C	1193.53	0.462783	3.54824e-07		YER018C	1193.53	-0.0615485	0.522443			YFL056C		YDR323C
	YBR085W	188.602	-1.04278	6.74446e-07		YBR093C	610.183	1.53889	8.04175e-25			YCR095W-A		YPR156C			YER019W	3792.59	-0.319152	1.03075e-05		YER019W	3792.59	-0.190745	0.00733153			YMR085W		YLR457C
	YBR086C	2040.65	-1.86253	7.68681e-50		YBR094W	254.76	0.159132	0.490448			YLR040C		YKL096W-A			YER019C-A	2537.55	-0.549058	2.0795e-16		YER019C-A	2537.55	-1.24959	1.35289e-82			YEL039C		YMR164C
	YBR087W	519.02	-0.0705238	0.688943		YBR095C	277.416	-0.179567	0.413198			YBR298C		YGR279C			YER020W	2719.56	-0.193534	0.00349256		YER020W	2719.56	0.337951	2.75279e-08			YDR124W		YHR105W
	YBR088C	2178.89	0.194939	0.135092		YBR096W	1493.45	0.602757	9.27151e-05			YOR202W		YGR027C			YER021W	6036.38	-0.204004	4.48273e-05		YER021W	6036.38	-0.224795	2.77674e-06			YGR064W		YDL197C
	YBR089C-A	2618.4	-0.0160293	0.92818		YBR097W	281.015	-0.104155	0.652205			YKL163W		YER146W			YER022W	2205.48	-0.0700488	0.355696		YER022W	2205.48	0.450617	6.18624e-12			YJR156C		YGL182C
	YBR091C	1332.48	0.222956	0.241097		YBR098W	120.826	-1.23579	3.07904e-06			YCR007C		YOL080C			YER023W	5612.14	-0.874631	1.16924e-59		YER023W	5612.14	-1.33851	4.75326e-144			YPR123C		YLR313C
	YBR092C	1535.57	-0.131308	0.348659		YBR101C	345.455	0.723581	3.92264e-05			YKR058W		YMR038C			YER023C-A	5.73675	2.02166	0.150081		YER023C-A	5.73675	0.488614	0.741401			YGL205W		YDR402C
	YBR093C	489.932	-3.81462	4.51387e-93		YBR102C	255.379	-0.334982	0.126398			YPL250W-A		YML008C			YER024W	1692.46	0.932686	1.08342e-29		YER024W	1692.46	1.45804	5.02029e-77			YBR299W		YKL187C
	YBR094W	196.761	-1.14452	5.40385e-08		YBR103W	136.571	0.511935	0.0592044			YOR120W		YGR089W			YER025W	9607.52	-0.53368	1.92061e-28		YER025W	9607.52	-0.768655	1.02492e-59			YHL047C		YGL090W
	YBR095C	344.948	0.705558	9.22792e-05		YBR104W	912.29	0.199974	0.194531			YPL250C		YOL155C			YER026C	5763.11	0.466962	1.16821e-15		YER026C	5763.11	-0.503445	2.699e-18			YIL163C		YPL280W
	YBR096W	1865.74	0.0799222	0.634419		YBR105C	632.601	-0.337521	0.037695			YCR089W		YOR136W			YER027C	2570.52	-0.612313	1.28304e-18		YER027C	2570.52	-0.348848	1.79879e-07			YMR065W		YCR089W
	YBR097W	258.373	-0.16278	0.440545		YBR106W	6658.07	0.621384	8.64513e-08			YMR096W		YDR247W			YER028C	702.963	0.274748	0.0177799		YER028C	702.963	1.01011	7.2529e-22			YBR072W		YNL117W
	YBR098W	169.452	1.87672	1.5144e-15		YBR107C	253.432	-1.32135	3.30947e-11			YMR169C		YOL059W			YER029C	1257.09	-0.471995	2.10047e-06		YER029C	1257.09	-0.10292	0.298822			YLR416C		YBR098W
	YBR101C	384.933	-0.367196	0.0354222		YBR108W	101.115	-0.197069	0.54927			YEL073C		YFL045C			YER030W	2241.71	-0.418383	1.46639e-08		YER030W	2241.71	-1.04629	2.58521e-49			YGR066C		YDL215C
	YBR102C	284.391	0.583603	0.00359601		YBR109C	12212.8	-0.112829	0.407679			YCR091W		YML024W			YER031C	2248.66	-0.466908	0.00504522		YER031C	2248.66	-1.02558	1.53708e-10			YNR056C		YKR097W
	YBR103C-A	8.37916	6.25681	0.000216338		YBR110W	1516.28	-0.049741	0.757524			YNR059W		YDR539W			YER032W	3167.15	-0.439415	8.57212e-13		YER032W	3167.15	-0.0161879	0.806021			YGR109W-B		YMR159C
	YBR103W	144.258	-0.35307	0.177442		YBR111C	2657.44	0.247626	0.063214			YOL052C-A		YDL001W			YER033C	3023.77	0.242656	0.000355229		YER033C	3023.77	0.699705	2.579e-28			YMR084W		YEL048C
	YBR104W	748.199	-0.936475	1.97849e-11		YBR111W-A	880.349	-0.0741547	0.686466			YPR193C		YOR308C			YER034W	941.922	0.388597	0.000345867		YER034W	941.922	0.855532	1.9003e-17			YER066C-A		YER189W
	YBR105C	748.046	0.727719	5.41309e-07		YBR112C	285.191	0.0341156	0.887365			YLL055W		YGR233C			YER035W	2758.31	0.620971	1.14949e-19		YER035W	2758.31	0.621943	6.84742e-21			YOR391C		YPL250C
	YBR106W	5560.77	-1.44342	2.68913e-36		YBR114W	184.611	0.18642	0.472362			YPR196W		YGR121C			YER036C	11749.7	-0.648864	3.90995e-39		YER036C	11749.7	-0.75726	1.66194e-54			YJR155W		YIL059C
	YBR107C	242.625	1.21656	1.06916e-09		YBR115C	1023.12	0.127895	0.419203			YPR160W		YGR281W			YER037W	2673.31	-0.760898	2.29491e-30		YER037W	2673.31	-0.702254	6.73312e-29			YLR446W		YKL222C
	YBR108W	195.527	1.64457	8.99846e-14		YBR117C	44.4212	-1.30495	0.00236063			YER121W		YER049W			YER038C	755.126	0.575673	2.02257e-07		YER038C	755.126	1.02072	1.95292e-22			YKL086W		YLR280C
	YBR109C	12825.5	0.225792	0.06302		YBR118W	126808	0.0985658	0.456922			YCR006C		YJR105W			YER038W-A	125.578	0.390012	0.13028		YER038W-A	125.578	0.0243041	0.92916			YLR235C		YDL211C
	YBR110W	1561.2	0.110109	0.438227		YBR119W	143.726	-0.189246	0.517769			YLR149C		YLL023C			YER039C	573.117	1.7063	1.11716e-37		YER039C	573.117	1.79378	8.70934e-44			YPR005C		YIL017C
	YBR111C	2845.2	-0.0623826	0.649618		YBR120C	755.683	0.268657	0.0849312			YIL028W		YHR174W			YER039C-A	230.718	1.75483	1.64843e-17		YER039C-A	230.718	1.78836	3.90095e-19			YEL072W		YLR122C
	YBR111W-A	884.156	0.0653086	0.699122		YBR121C	6726.24	0.429521	0.000246712			YKR041W		YOL151W			YER040W	3192.26	0.507689	2.42028e-16		YER040W	3192.26	1.06129	1.80335e-72			YLR263W		YOR388C
	YBR112C	271.103	-0.209654	0.299548		YBR122C	1439.6	-0.440361	0.000961209			YBL049W		YDL085C-A			YER041W	1250.05	0.930445	2.3577e-26		YER041W	1250.05	1.04018	1.4257e-34			YDL244W		YDR223W
	YBR114W	196.423	-0.0251233	0.918636		YBR123C	109.557	0.272372	0.3951			YLR318W		YDR233C			YER042W	1258.88	-0.360246	3.75883e-05		YER042W	1258.88	-1.16947	2.16085e-44			YIL164C		YJL110C
	YBR115C	1059.08	-0.0477093	0.753049		YBR125C	747.142	-0.0283538	0.878453			YOL163W		YBL001C			YER043C	20420.6	-0.383252	1.99496e-17		YER043C	20420.6	-1.19804	6.39832e-161			YPL171C		YGR288W
	YBR117C	66.0095	2.04687	1.62997e-08		YBR126C	1344.04	0.307271	0.0254028			YOL146W		YOR382W			YER044C	3195.89	-0.211937	0.00137107		YER044C	3195.89	-1.29451	1.03827e-92			YBL096C		YER065C
	YBR118W	98786.8	-1.01406	1.45395e-21		YBR126W-A	3569.46	1.42891	1.33006e-25			YGR032W		YIL002W-A			YER044C-A	441.621	1.51721	1.97833e-24		YER044C-A	441.621	1.65406	1.8244e-30			YER039C-A		YGR015C
	YBR119W	152.21	0.319637	0.216193		YBR127C	7633.48	0.369307	0.00580627			YAL028W		YPR158W-A			YER045C	2896.95	0.352151	2.22946e-08		YER045C	2896.95	0.239406	8.65587e-05			YAR019W-A		YIR014W
	YBR120C	858.837	0.0893626	0.570432		YBR128C	34.6906	-0.7803	0.114276			YLR251W		YOR265W			YER046W	522.643	1.03218	1.83962e-13		YER046W	522.643	0.953947	2.11538e-12			YBR018C		YGL034C
	YBR121C	6520.57	-0.56425	8.51959e-07		YBR129C	252.668	-0.328021	0.142031			YNR034W-A		YOL163W			YER046W-A	11.8754	-0.920528	0.346597		YER046W-A	11.8754	0.779509	0.343049			YIL066C		YML089C
	YBR122C	1375.23	0.303657	0.0224		YBR130C	573.02	-0.269674	0.13777			YGR289C		YGL196W			YER047C	1992.23	-0.207234	0.292516		YER047C	1992.23	1.0862	1.12806e-09			YAL063C		YGL063W
	YBR123C	111.715	-0.233162	0.401258		YBR131W	109.816	0.759516	0.0056077			YER066W		YBR086C			YER048C	3184.54	-0.478518	8.91064e-11		YER048C	3184.54	-0.736078	5.55248e-25			YPR030W		YLR315W
	YBR124W	28.5145	8.02337	2.74464e-07		YBR132C	160.261	-0.14437	0.636689			YJL107C		YOR133W			YER048W-A	2256.82	0.0428114	0.594525		YER048W-A	2256.82	-0.209147	0.00320843			YGR088W		YGL251C
	YBR125C	605.204	-0.681199	1.08224e-05		YBR133C	690.902	-0.000216165	0.999098			YGR154C		YPL265W			YER049W	5680.83	-0.548245	2.14979e-30		YER049W	5680.83	-0.793041	1.07574e-65			YLR318W		YOR391C
	YBR126C	1474.79	-0.0452756	0.75166		YBR135W	1172.99	0.0924858	0.561687			YLR281C		YMR102C			YER050C	2299.65	0.361687	1.85953e-07		YER050C	2299.65	-0.132	0.057639			YLR315W		YKR077W
	YBR126W-A	3587.44	-1.4415	1.07276e-20		YBR136W	200.12	-0.0553041	0.839467			YMR189W		YPL249C-A			YER051W	1036.28	0.328788	0.000689514		YER051W	1036.28	0.65193	4.91896e-13			YOL159C-A		YDL044C
	YBR127C	6300.45	-1.14201	8.49183e-23		YBR137W	1298.37	0.228943	0.153696			YJL161W		YBR286W			YER052C	8437.82	0.112615	0.034548		YER052C	8437.82	-0.252826	5.4471e-07			YJR095W		YBL094C
	YBR128C	28.2974	0.266185	0.623151		YBR138C	156.526	-0.911124	0.00011113			YEL011W		YBL087C			YER053C	3417.21	0.351335	8.44141e-09		YER053C	3417.21	-0.306117	3.21254e-07			YJL088W		YFL054C
	YBR129C	240.531	0.176873	0.416036		YBR139W	2055.96	-0.174419	0.271662			YMR105C		YAL030W			YER053C-A	2227.76	1.16192	1.01891e-53		YER053C-A	2227.76	0.110355	0.164927			YDR250C		YER121W
	YBR130C	522.801	-0.0049438	0.978972		YBR140C	560.712	-0.177257	0.465957			YGR248W		YDL048C			YER055C	7488.47	-0.212377	5.144e-05		YER055C	7488.47	-0.254683	5.05858e-07			YJL215C		YDR009W
	YBR131W	114.912	-0.617751	0.0226441		YBR141C	192.985	0.370607	0.109574			YBR043C		YDR365C			YER056C	15534.6	-0.201975	8.52507e-05		YER056C	15534.6	-0.548001	2.61576e-28			YOR128C		YOR019W
	YBR132C	262.872	1.27545	9.32054e-10		YBR141W-A	191.226	-1.11371	4.39911e-07			YGR070W		YEL026W			YER056C-A	7321.63	-0.362243	2.80147e-11		YER056C-A	7321.63	-1.33383	8.74102e-139			YGR161W-C		YBR299W
	YBR133C	620.241	-0.354873	0.0249687		YBR142W	487.274	0.137051	0.477921			YFR015C		YMR320W			YER057C	3329.26	-0.441902	3.89945e-13		YER057C	3329.26	-1.51937	2.61159e-143			YMR291W		YFL065C
	YBR135W	1460.91	0.480679	0.000173828		YBR143C	2669.55	0.281882	0.036807			YHR087W		YNL037C			YER058W	463.556	0.0893873	0.646887		YER058W	463.556	-0.160431	0.376035			YFL064C		YMR316C-B
	YBR136W	173.783	-0.400258	0.0839179		YBR145W	349.181	-0.447733	0.0151185			YOR178C		YLR040C			YER059W	1813.24	0.183019	0.0195496		YER059W	1813.24	0.692952	1.99792e-22			YGL193C		YAL028W
	YBR137W	1295.99	-0.258166	0.084983		YBR146W	1716.04	-0.0617188	0.701674			YJR008W		YHR143W			YER060W	1917.04	-2.04158	4.68524e-110		YER060W	1917.04	-1.77683	4.8106e-95			YDR215C		YPL267W
	YBR138C	212.818	1.52907	1.9676e-13		YBR147W	27.82	-7.99944	6.43978e-07			YDR277C		YOR267C			YER060W-A	424.915	0.902994	1.0935e-10		YER060W-A	424.915	-0.787372	2.76796e-08			YPL282C		YKL171W
	YBR139W	2179.81	0.309389	0.0254547		YBR149W	1764.68	-0.411734	0.00227801			YDL243C		YOL110W			YER061C	905.153	0.0847772	0.44822		YER061C	905.153	0.874941	1.90105e-20			YBR294W		YBR293W
	YBR140C	616.661	0.407884	0.0767324		YBR150C	93.8442	-0.126478	0.732954			YNL078W		YIL159W			YER062C	2660.18	-0.226851	0.00239075		YER062C	2660.18	-0.828303	6.84991e-32			YMR180C		YHR153C
	YBR141C	186.995	-0.504228	0.0187521		YBR151W	1163.72	0.759022	4.30925e-08			YDL109C		YLR099W-A			YER063W	1747.5	0.202939	0.00960539		YER063W	1747.5	-0.494206	2.55396e-11			YJL116C		YKR041W
	YBR141W-A	455.584	2.69358	8.26438e-50		YBR152W	31.6648	-0.164049	0.777389			YOR128C		YER044C			YER064C	4823.29	0.539745	1.1849e-16		YER064C	4823.29	0.653821	9.04119e-25			YGR032W		YNL077W
	YBR142W	457.117	-0.363618	0.0258824		YBR153W	355.652	-0.50146	0.0149533			YFR034W-A		YDR445C			YER065C	579.513	0.317004	0.0157708		YER065C	579.513	1.33963	3.30199e-30			YML089C		YOR009W
	YBR143C	2357.34	-0.744132	5.93294e-09		YBR154C	2760.5	0.72629	1.24541e-09			YKL053W		YKR057W			YER066W	428.681	2.58647	1.10782e-61		YER066W	428.681	2.43512	1.07415e-56			YML128C		YNL128W
	YBR145W	565.567	1.48592	4.24546e-21		YBR155W	573.051	0.848885	2.59073e-08			YLR446W		YML081C-A			YER066C-A	27.2925	1.79016	0.00250997		YER066C-A	27.2925	0.914713	0.125098			YOR173W		YDR344C
	YBR146W	1469.42	-0.44113	0.000713284		YBR156C	65.8866	-0.39978	0.293489			YJL106W		YDR428C			YER067W	4014.81	2.36494	1.535e-245		YER067W	4014.81	1.59339	4.6554e-114			YIL073C		YMR100W
	YBR147W	118.664	10.0805	2.57798e-11		YBR157C	535.744	0.751637	1.58517e-06			YBR141W-A		YNL070W			YER067C-A	10.6869	1.24959	0.188976		YER067C-A	10.6869	0.156799	0.876187			YDL242W		YDL223C
	YBR149W	2026.34	0.72761	1.18903e-08		YBR158W	1285.07	0.298374	0.0947079			YGR161C		YMR051C			YER068W	4206.04	-0.0652012	0.337424		YER068W	4206.04	0.850635	3.60351e-47			YIL102C-A		YGR109W-B
	YBR150C	139.335	1.05593	1.30796e-05		YBR159W	3023.61	0.285591	0.0234801			YJR115W		YLR333C			YER068C-A	16.5016	3.33136	0.000685088		YER068C-A	16.5016	2.64458	0.00639742			YER039C		YOL106W
	YBR151W	1131.02	-0.904498	5.44794e-12		YBR160W	624.343	0.0425196	0.829603			YMR196W		YOR247W			YER069W	5050.21	0.970748	1.88112e-73		YER069W	5050.21	0.747825	1.47908e-45			YOR028C		YKR102W
	YBR152W	43.6177	0.929455	0.0252198		YBR161W	297.999	0.201434	0.358254			YDR363W		YLR179C			YER070W	16267.6	0.108694	0.0269756		YER070W	16267.6	-0.0992598	0.0389816			YLL066W-B		YLR010C
	YBR153W	417.446	0.860289	6.5119e-06		YBR162C	5681.49	1.06878	4.09197e-13			YGR050C		YBL099W			YER071C	618.912	0.0531258	0.709804		YER071C	618.912	-0.248117	0.046814			YLR406C-A		YCL030C
	YBR154C	2725.92	-0.804959	1.15472e-10		YBR162W-A	6496.21	0.831126	3.61375e-11			YDR007W		YEL017C-A			YER072W	6942.55	-1.28362	1.34888e-132		YER072W	6942.55	-1.60471	2.64738e-218			YKL162C-A		YBL103C
	YBR155W	530.302	-1.22343	5.20695e-14		YBR163W	505.769	-0.433732	0.00922127			YHR153C		YKR042W			YER073W	7540.19	-0.14615	0.00827167		YER073W	7540.19	0.100562	0.0642434			YIL165C		YDR119W-A
	YBR156C	96.887	1.24957	2.32457e-05		YBR164C	2940.96	0.29526	0.0278994			YJR004C		YNL217W			YER074W	7497.77	-0.684543	2.87661e-35		YER074W	7497.77	-1.47145	2.47373e-161			YLL063C		YDR448W
	YBR157C	591.103	-0.423648	0.00511062		YBR165W	416.893	-0.257582	0.158707			YCR018C-A		YPR003C			YER074W-A	1948.64	-0.31982	4.15016e-05		YER074W-A	1948.64	-0.857176	8.23835e-31			YCR014C		YDR007W
	YBR158W	1216.74	-0.50581	0.00330154		YBR166C	957.255	0.0266829	0.883054			YHR210C		YOR344C			YER075C	2781.25	-0.14992	0.0246437		YER075C	2781.25	0.51987	1.0491e-17			YHL048C-A		YDR386W
	YBR159W	2552.67	-0.929074	2.49327e-15		YBR167C	848.057	-0.39455	0.0134238			YER185W		YPL143W			YER076C	887.98	1.16586	2.94545e-30		YER076C	887.98	1.40142	5.43483e-46			YMR315W-A		YPR168W
	YBR160W	626.192	-0.0566167	0.75583		YBR168W	310.509	-0.380156	0.0529498			YAL063C-A		YCR060W			YER076W-A	99.3412	-0.0841275	0.787401		YER076W-A	99.3412	-0.712376	0.00760373			YOR376W-A		YDL020C
	YBR161W	397.638	0.563304	0.00149216		YBR169C	68.543	1.23733	0.00219333			YGR016W		YOR107W			YER077C	2963.04	0.567517	1.2274e-17		YER077C	2963.04	0.960112	1.0992e-51			YJL077W-B		YMR017W
	YBR162C	5167.76	-1.58741	2.43868e-35		YBR170C	650.561	-0.522549	0.000619608			YLL063C		YNL065W			YER078C	1424.44	-0.234261	0.00542331		YER078C	1424.44	-0.0734392	0.381469			YER084W		YJL146W
	YBR162W-A	7229.81	-0.463651	0.000194247		YBR171W	1056.14	0.572092	6.68408e-05			YPR036W-A		YCR075W-A			YER078W-A	61.6083	2.11104	1.37794e-07		YER078W-A	61.6083	1.9	1.15413e-06			YAL061W		YHR090C
	YBR163W	434.68	0.00679144	0.970857		YBR172C	331.162	0.119402	0.581034			YPR184W		YHR208W			YER079W	762.881	0.824665	1.11336e-12		YER079W	762.881	0.288026	0.0125933			YNL270C		YIL055C
	YBR164C	3040.66	-0.21362	0.0950041		YBR173C	2347.62	-0.0483155	0.759122			YER067W		YGL147C			YER079C-A	3.36233	1.16793	0.511536		YER079C-A	3.36233	0.299974	0.867092			YDL197C		YOL015W
	YBR165W	469.736	0.540736	0.000739331		YBR175W	515.15	-0.619086	0.000104128			YDR077W		YGR206W			YER080W	3675.8	-0.466039	4.84556e-15		YER080W	3675.8	-0.580836	1.96981e-24			YJR008W		YJL194W
	YBR166C	1077.58	0.279146	0.0505846		YBR176W	162.754	-0.00606824	0.985664			YCL016C		YLR336C			YER081W	3219.77	0.478638	3.66819e-13		YER081W	3219.77	0.833535	5.00751e-40			YGL024W		YLL025W
	YBR167C	944.834	0.641052	2.16627e-05		YBR177C	1084.88	0.150372	0.327102			YFR053C		YBR048W			YER082C	3625.64	-0.347023	8.10436e-08		YER082C	3625.64	-0.19667	0.00183326			YLR010C		YPR120C
	YBR168W	325.996	0.483432	0.00739485		YBR179C	247.678	-0.200125	0.374338			YOR162C		YCL018W			YER083C	4160.86	0.094453	0.142886		YER083C	4160.86	-0.627207	3.29797e-26			YLR258W		YPR061C
	YBR169C	100.133	0.100065	0.800138		YBR181C	73369.8	0.182389	0.131795			YIL164C		YHR057C			YER084W	209.877	1.67436	6.17109e-14		YER084W	209.877	0.616942	0.00646013			YCL007C		YKL162C
	YBR170C	608.342	0.334418	0.0301521		YBR182C	94.3449	-0.450878	0.159302			YKL161C		YDR481C			YER084W-A	2.66643	1.0439	0.608855		YER084W-A	2.66643	-1.47087	0.497083			YCR073C		YLR456W
	YBR171W	991.3	-0.841151	3.11397e-09		YBR182C-A	70.949	2.76291	5.89367e-14			YJR154W		YIL001W			YER085C	36.1593	0.893201	0.125834		YER085C	36.1593	1.34609	0.0105426			YFL057C		YDL106C
	YBR172C	428.374	0.552015	0.00160779		YBR183W	856.713	0.224352	0.146879			YGL121C		YFL037W			YER086W	8802.28	-0.445255	5.87536e-13		YER086W	8802.28	-1.17567	5.35541e-84			YLR122C		YCR100C
	YBR173C	2287.32	-0.0490645	0.741942		YBR184W	12.0685	-6.79328	5.71352e-05			YOR173W		YMR241W			YER087W	1206.06	-0.230638	0.0137222		YER087W	1206.06	-0.0492288	0.601223			YJL152W		YML107C
	YBR175W	549.396	0.751999	8.02502e-07		YBR185C	525.584	-0.313919	0.0705374			YGR161W-C		YPL271W			YER087C-A	104.124	0.645691	0.0266742		YER087C-A	104.124	-0.619484	0.031388			YHR211W		YLR031W
	YBR176W	165.655	0.035204	0.900145		YBR187W	3194.02	0.133725	0.501835			YCL056C		YIL123W			YER087C-B	3800.82	-0.611997	6.02095e-25		YER087C-B	3800.82	-1.25942	1.52824e-105			YEL069C		YFR027W
	YBR177C	1035.1	-0.32184	0.0186362		YBR188C	536.784	-0.180584	0.366014			YOR083W		YBR155W			YER088C	8679.73	0.206493	0.000103407		YER088C	8679.73	-0.0471707	0.396713			YLR030W		YDR147W
	YBR178W	6.91483	5.97961	0.000534486		YBR189W	33786.4	0.382711	0.000966584			YJL133C-A		YPL082C			YER088C-A	2746.01	0.259733	0.00232557		YER088C-A	2746.01	-0.198012	0.0185054			YPL017C		YIL082W-A
	YBR179C	237.869	0.0676123	0.759533		YBR191W	44241	0.159371	0.259143			YOL159C-A		YPL088W			YER088W-B	26.4637	-1.00921	0.0882284		YER088W-B	26.4637	-3.17519	1.3262e-07			YIL060W		YLR393W
	YBR181C	58320.4	-1.04686	8.22121e-23		YBR191W-A	71.4353	-0.745397	0.0316828			YLR258W		YBR243C			YER089C	7765.66	-0.0367187	0.604725		YER089C	7765.66	-0.350647	2.15933e-08			YEL028W		YPL119C
	YBR182C	101.065	0.601968	0.0360287		YBR192W	289.28	0.038747	0.87911			YCR063W		YGL009C			YER090W	5014.65	-0.124617	0.031979		YER090W	5014.65	-0.36052	2.97216e-11			YDR534C		YGL193C
	YBR182C-A	81.3979	-1.70205	6.8141e-08		YBR193C	772.584	-0.786993	6.48014e-08			YJL144W		YER117W			YER090C-A	2.8386	4.73201	0.0267224		YER090C-A	2.8386	3.57073	0.0929816			YDL109C		YKL161C
	YBR183W	1117.93	0.489281	0.000248053		YBR194W	270.863	-0.803411	3.87927e-05			YER076C		YER071C			YER091C	21122.6	-0.221455	6.00096e-06		YER091C	21122.6	-0.497523	1.34717e-25			YHR212C		YER104W
	YBR184W	19.4991	7.47509	2.45529e-06		YBR195C	238.792	0.190095	0.401658			YIL102C-A		YFR040W			YER091C-A	3.23457	-0.238327	0.907868		YER091C-A	3.23457	0.444754	0.80085			YNL146W		YIL146C
	YBR185C	435.185	-0.245739	0.147248		YBR196C	21596.7	0.545829	1.00213e-06			YCR075C		YBL092W			YER092W	1431.93	1.08922	5.48179e-38		YER092W	1431.93	0.512095	9.69236e-10			YDL085W		YJL043W
	YBR187W	2832.81	-0.54973	0.00188043		YBR196C-A	15.6008	7.65482	3.92405e-06			YJR152W		YDL191W			YER093C	2888.86	-0.122846	0.0959631		YER093C	2888.86	0.370545	3.17508e-08			YHR209W		YGL183C
	YBR188C	690.224	0.782927	1.81462e-07		YBR196C-B	44.0933	9.14521	6.74679e-09			YFL064C		YGR091W			YER093C-A	791.997	0.15683	0.174903		YER093C-A	791.997	0.0739396	0.512358			YHR153C		YDR213W
	YBR189W	28091.8	-1.12689	2.90535e-23		YBR197C	810.005	-1.09652	5.63473e-15			YCR101C		YDR139C			YER094C	5095.66	0.0548018	0.352929		YER094C	5095.66	-0.174803	0.00104799			YOR192C		YER175C
	YBR191W	35111.6	-1.0198	8.21646e-16		YBR198C	530.765	0.118197	0.518427			YFL050C		YBR162W-A			YER095W	4551.45	0.37137	4.41197e-08		YER095W	4551.45	0.297039	8.00436e-06			YHR054W-A		YBR150C
	YBR191W-A	26.9701	-8.44592	6.82786e-08		YBR199W	1270.76	0.252712	0.0990205			YGR107W		YDR135C			YER096W	537.479	0.179573	0.209334		YER096W	537.479	0.765995	6.46021e-10			YFL065C		YHL018W
	YBR192W	234.788	-0.761525	0.00013806		YBR200W	367.088	0.283137	0.130977			YBR072W		YOR306C			YER097W	659.037	-1.49234	3.66441e-33		YER097W	659.037	-0.843049	1.15462e-13			YKR041W		YIL144W
	YBR193C	775.985	0.779603	1.53209e-07		YBR201C-A	54.6024	1.56335	5.31759e-05			YOR201C		YMR202W			YER098W	986.359	0.398165	7.97528e-05		YER098W	986.359	0.990347	1.44244e-26			YBR297W		YDR089W
	YBR194W	347.532	1.31992	1.04211e-13		YBR201W	254.278	-0.0488778	0.840348			YGL125W		YML115C			YER099C	2812.17	0.141662	0.0477964		YER099C	2812.17	0.137535	0.0446194			YCR020W-B		YHL026C
	YBR195C	254.6	-0.0209166	0.925752		YBR202W	395.663	-0.286713	0.121531			YJL199C		YLR361C-A			YER100W	2119.81	-0.406581	3.12479e-07		YER100W	2119.81	-0.505114	2.8356e-11			YLR125W		YBL060W
	YBR196C	21712	-0.554085	1.05231e-06		YBR203W	108.081	-1.52119	1.30299e-07			YBR284W		YMR208W			YER101C	976.094	1.07811	5.17215e-26		YER101C	976.094	0.904926	9.95898e-20			YOR393W		YNL328C
	YBR196C-A	15.7264	-7.67779	1.8475e-06		YBR204C	169.765	0.343922	0.166534			YDR019C		YOR383C			YER102W	5525.02	-0.832707	4.14599e-53		YER102W	5525.02	-1.34068	6.42903e-141			YFL054C		YKR069W
	YBR196C-B	44.4227	-9.16769	2.54825e-09		YBR205W	1894.62	0.704558	1.14141e-08			YMR175W		YGR019W			YER103W	2550.46	1.08689	1.36394e-44		YER103W	2550.46	0.732861	4.46096e-22			YAR020C		YPR158W
	YBR197C	730.23	0.854081	2.29533e-09		YBR207W	734.776	0.337675	0.0330536			YCR073C		YFR018C			YER104W	682.948	0.717249	8.52557e-10		YER104W	682.948	1.23638	4.06254e-29			YCR096C		YDR131C
	YBR198C	748.607	0.756389	9.74168e-08		YBR208C	785.642	-0.605024	2.48777e-05			YIR039C		YHR039C-A			YER105C	7036.51	-0.403457	1.92901e-14		YER105C	7036.51	-0.194179	0.000188438			YHL036W		YHR002W
	YBR199W	1268.27	-0.283318	0.0395142		YBR210W	1279.76	0.207937	0.16495			YKL221W		YJL116C			YER106W	79.8729	0.0990809	0.801498		YER106W	79.8729	0.59563	0.0694667			YKL188C		YGR179C
	YBR200W	397.164	-0.0649113	0.725108		YBR211C	340.57	0.0291302	0.897511			YKL026C		YKL053C-A			YER107C	1726.08	-0.476294	4.96504e-10		YER107C	1726.08	0.268451	0.000203164			YGL069C		YIL132C
	YBR201C-A	89.57	0.245829	0.451105		YBR212W	210.097	0.00672171	0.980315			YMR180C		YGR202C			YER109C	2703.38	0.665755	4.11836e-25		YER109C	2703.38	0.717531	1.31509e-30			YML007C-A		YLL033W
	YBR201W	198.499	-0.79585	0.00011355		YBR213W	111.164	-0.152857	0.648131			YKL220C		YML060W			YER110C	16062.6	-1.21514	2.12112e-91		YER110C	16062.6	-1.26095	2.1927e-100			YAL065C		YJR108W
	YBR202W	327.35	-0.281453	0.128307		YBR214W	630.696	0.336617	0.0774271			YFL054C		YBL026W			YER111C	4244.05	-0.00173185	0.981911		YER111C	4244.05	1.08775	8.95948e-61			YJR151C		YIL166C
	YBR203W	89.9212	1.13373	0.000148135		YBR215W	205.705	-0.517978	0.0238703			YDL197C		YMR181C			YER112W	2746.21	-0.407942	8.88932e-11		YER112W	2746.21	-0.395362	4.30424e-11			YIR031C		YNL011C
	YBR204C	188.881	-0.0376006	0.881917		YBR216C	113.214	-1.05642	0.000127955			YKR012C		YLR046C			YER113C	3113.88	-0.564994	8.53944e-19		YER113C	3113.88	-0.175133	0.00529781			YAL064W		YPL209C
	YBR205W	1773.24	-1.00349	1.25677e-16		YBR217W	366.069	-1.49544	1.28973e-17			YDL025C		YMR001C-A			YER115C	646.38	0.0709059	0.573874		YER115C	646.38	0.603828	1.75681e-08			YGR043C		YBR240C
	YBR207W	936.391	0.340376	0.0154032		YBR218C	697.929	0.349812	0.0405877			YPL148C		YIL111W			YER116C	998.098	0.883382	4.96056e-20		YER116C	998.098	0.79478	1.54947e-17			YGL034C		YOR025W
	YBR208C	1114.68	1.3502	2.80039e-21		YBR220C	223.724	0.413634	0.0602064			YBR297W		YBR041W			YER117W	7684.14	-0.554336	4.82905e-29		YER117W	7684.14	-1.55265	1.15296e-221			YCR039C		YDR265W
	YBR210W	1492.78	0.214349	0.122796		YBR221C	10652.5	0.0858907	0.589499			YHR199C-A		YJL062W-A			YER118C	3513.39	-0.246293	2.05659e-05		YER118C	3513.39	-0.269551	1.07434e-06			YMR175W		YML050W
	YBR211C	352.442	0.04741	0.809545		YBR222C	881.488	0.458824	0.00487283			YOL104C		YNL007C			YER119C	2479.66	0.0819556	0.40872		YER119C	2479.66	-0.576378	9.62539e-11			YDL243C		YGR294W
	YBR212W	332.786	1.09609	5.50297e-10		YBR223C	102.209	-0.851832	0.00450733			YPL258C		YNL244C			YER119C-A	19.7139	1.05271	0.138178		YER119C-A	19.7139	0.531273	0.450246			YNL046W		YOR339C
	YBR213W	76.5767	-1.17598	0.000133838		YBR225W	116.595	-0.0865744	0.789683			YOL015W		YNL162W			YER120W	7945.03	-0.639502	8.19191e-36		YER120W	7945.03	-0.957253	1.20609e-81			YKL221W		YLR394W
	YBR214W	747.501	0.146239	0.433838		YBR227C	177.213	-0.0721062	0.792143			YCL010C		YNL151C			YER121W	201.721	2.11415	9.96442e-18		YER121W	201.721	1.31748	7.47593e-08			YIR017W-A		YOR380W
	YBR215W	214.884	0.60499	0.0046086		YBR228W	70.527	1.48185	6.65984e-06			YEL039C		YJR139C			YER122C	6904.42	-0.330268	3.96222e-10		YER122C	6904.42	-0.176096	0.000692219			YJL216C		YDL085W
	YBR216C	103.27	0.839039	0.00209836		YBR229C	1248.69	0.0210707	0.907324			YDL187C		YML078W			YER123W	3036.7	-0.189978	0.00361422		YER123W	3036.7	0.550312	4.84335e-20			YPR153W		YJR004C
	YBR217W	402.923	1.66547	2.87909e-22		YBR230C	1881.29	-0.382701	0.00361853			YCR076C		YJL080C			YER124C	7796.6	0.179249	0.000435283		YER124C	7796.6	0.443549	4.24492e-20			YJL199C		YLR037C
	YBR218C	623.642	-0.779133	3.56932e-06		YBR230W-A	235.891	0.303304	0.174419			YPR005C		YOR234C			YER125W	10918.6	-0.454217	6.74494e-23		YER125W	10918.6	-0.378443	5.71175e-17			YOR304C-A		YPR085C
	YBR220C	235.787	-0.266603	0.200676		YBR231C	139.173	-0.855778	0.00069792			YER103W		YIL148W			YER126C	3589.17	-0.433805	1.64596e-14		YER126C	3589.17	-0.447296	1.44289e-16			YIR013C		YMR140W
	YBR221C	11002.6	-0.0125514	0.935425		YBR233W	55.5479	-0.128368	0.775253			YKL164C		YGR034W			YER127W	3034.98	-0.281927	2.0723e-05		YER127W	3034.98	-0.0457594	0.504129			YNR073C		YOR363C
	YBR222C	988.198	-0.116009	0.454757		YBR233W-A	885.002	0.693591	6.7899e-07			YPR002W		YDL241W			YER128W	526.814	-0.00557695	0.969177		YER128W	526.814	-0.022976	0.865386			YLR317W		YKL048C
	YBR223C	141.704	1.5128	1.49811e-08		YBR234C	1784.26	0.206396	0.179025			YML027W		YDR121W			YER129W	4771.06	-0.166374	0.00606898		YER129W	4771.06	0.57365	2.77959e-24			YCR041W		YGR107W
	YBR225W	172.175	1.01729	6.35015e-06		YBR235W	905.889	-0.173568	0.313937			YLR286W-A		YNL066W			YER130C	3359.21	-0.526179	4.24927e-17		YER130C	3359.21	-0.585056	3.61441e-22			YCL016C		YDR313C
	YBR227C	170.785	-0.0566183	0.822039		YBR236C	232.558	-0.173804	0.52431			YOR318C		YHR007C			YER131W	8926.79	-0.803228	2.37357e-61		YER131W	8926.79	-1.19817	7.28073e-140			YLR123C		YKL169C
	YBR228W	92.6361	-0.376419	0.229057		YBR237W	226.832	-1.13366	3.729e-07			YKL222C		YJR148W			YER132C	6319.63	-0.77696	3.391e-44		YER132C	6319.63	-0.139536	0.0122957			YAR023C		YOR077W
	YBR229C	1135.6	-0.336795	0.0203128		YBR238C	1655.77	0.203005	0.161835			YGL118C		YIL053W			YER133W	5033.69	-0.342734	1.2276e-11		YER133W	5033.69	-0.581839	4.71551e-33			YCL004W		YCR066W
	YBR230C	1896.59	0.383917	0.00397722		YBR239C	135.794	-0.510138	0.0508096			YNL309W		YHR071C-A			YER134C	1638.21	0.0611747	0.495694		YER134C	1638.21	-0.243485	0.0024175			YER044C-A		YHR044C
	YBR230W-A	380.531	0.926373	3.26794e-07		YBR240C	43.1548	-0.122876	0.809402			YNL036W		YMR260C			YER135C	15.5192	1.24396	0.100117		YER135C	15.5192	0.873629	0.236396			YIR019C		YDR191W
	YBR231C	139.696	0.846703	0.000559671		YBR241C	277.348	-0.0365518	0.880863			YIR031C		YNR028W			YER136W	5608.78	-0.464142	3.94903e-18		YER136W	5608.78	-0.164861	0.00176023			YHL002C-A		YDL105W
	YBR233W	61.4972	0.375677	0.301353		YBR242W	773.755	0.394691	0.0104965			YCR020W-B		YDL160C-A			YER137C	381.527	0.839779	2.74851e-08		YER137C	381.527	0.622579	2.09197e-05			YBR270C		YKL095W
	YBR233W-A	1011.86	-0.258408	0.0655118		YBR243C	242.951	0.847961	1.64564e-05			YNL125C		YJR086W			YER137W-A	9.002	-0.612619	0.559847		YER137W-A	9.002	-2.06234	0.0368597			YCR106W		YML002W
	YBR234C	1851.72	-0.116834	0.445542		YBR244W	570.786	0.420518	0.00820097			YIR042C		YCL057C-A			YER138C	1545.32	-1.71133	5.05315e-60		YER138C	1545.32	-2.20119	5.01027e-103			YPR036W-A		YKL090W
	YBR235W	841.158	-0.0570978	0.716049		YBR246W	629.971	-1.08616	2.90486e-13			YLR211C		YOL115W			YER137C-A	242.825	-1.80916	9.16185e-14		YER137C-A	242.825	-2.58516	9.07211e-28			YHL012W		YJL023C
	YBR236C	235.41	0.185351	0.468554		YBR247C	561.033	0.273201	0.115074			YGL128C		YDR079W			YER138W-A	490.048	0.0625824	0.669513		YER138W-A	490.048	-1.27138	5.23887e-23			YLR031W		YMR180C
	YBR237W	229.933	1.14456	1.78514e-08		YBR248C	768.408	-0.252148	0.120161			YOL164W		YDR075W			YER139C	982.227	0.878845	1.67812e-18		YER139C	982.227	1.10086	2.52806e-30			YOL157C		YJL108C
	YBR238C	1397.11	-0.824115	3.06021e-09		YBR249C	5364.43	-0.217624	0.0981051			YIR018C-A		YBR054W			YER140W	1536.38	-0.373025	4.57336e-06		YER140W	1536.38	0.445137	3.75385e-09			YIR042C		YPL253C
	YBR239C	147.978	0.697226	0.00476768		YBR251W	486.37	-0.30346	0.0779364			YIL029C		YNR030W			YER141W	6938.85	-0.296244	2.77257e-06		YER141W	6938.85	-0.806494	1.06365e-39			YJR152W		YPL219W
	YBR240C	35.3625	-0.52055	0.26811		YBR252W	5094.68	0.210059	0.303153			YLR271W		YHR178W			YER142C	430.726	0.0908396	0.573874		YER142C	430.726	0.311093	0.0271458			YNL279W		YGL235W
	YBR241C	344.578	0.582593	0.00085124		YBR253W	962.196	-0.300849	0.0621014			YGR131W		YLR143W			YER143W	1951.68	0.0484167	0.553934		YER143W	1951.68	0.527204	2.89806e-14			YEL041W		YBR211C
	YBR242W	837.602	-0.165407	0.304068		YBR254C	736.279	-0.245978	0.650112			YKL091C		YJL151C			YER144C	4025.43	0.11631	0.173263		YER144C	4025.43	0.193287	0.0161432			YGL010W		YJL049W
	YBR243C	231.983	-1.07713	3.55412e-08		YBR255C-A	1249.98	-0.122664	0.437643			YBR293W		YOR040W			YER145C	5144.37	-0.470147	8.27998e-19		YER145C	5144.37	-0.215642	3.08871e-05			YHR157W		YLR227C
	YBR244W	656.121	-0.0097443	0.954649		YBR255W	211.023	-0.161561	0.521163			YLR315W		YJL173C			YER145C-A	26.6667	-0.500522	0.4165		YER145C-A	26.6667	-0.970859	0.0800761			YML054C		YML041C
	YBR246W	460.767	0.341023	0.0371986		YBR256C	1933.02	-0.189264	0.190459			YMR124W		YJL130C			YER146W	1763.98	-0.396634	7.80519e-07		YER146W	1763.98	-0.683855	4.33835e-19			YFL050C		YDR130C
	YBR247C	581.84	-0.18381	0.254341		YBR257W	304.797	-0.0334741	0.887365			YCR086W		YCR047C			YER147C	1292.52	-0.206153	0.0209495		YER147C	1292.52	0.192611	0.0208829			YKL187C		YDR228C
	YBR248C	673.535	-0.142273	0.364605		YBR258C	380.441	0.0783522	0.710591			YKL096W		YGL084C			YER147C-A	2.99692	1.07529	0.590633		YER147C-A	2.99692	1.36634	0.458852			YCR075C		YLR004C
	YBR249C	5056.98	0.0332156	0.80526		YBR259W	129.848	-0.597332	0.0238801			YDR133C		YJR040W			YER148W	2663.54	-0.703389	1.04112e-19		YER148W	2663.54	-0.768769	1.39215e-24			YPR002W		YBL019W
	YBR250W	36.8998	8.39531	5.77626e-08		YBR260C	418.947	-0.167423	0.381246			YBR117C		YNL241C			YER148W-A	10.1327	-0.537195	0.604465		YER148W-A	10.1327	-0.774979	0.415982			YAL028W		YBR165W
	YBR251W	483.868	0.269872	0.116663		YBR261C	660.509	-0.268546	0.102329			YOL158C		YLR372W			YER149C	1223.87	-0.451127	6.17035e-07		YER149C	1223.87	-0.0854603	0.348556			YCL049C		YGR006W
	YBR252W	4958.59	-0.318542	0.0954606		YBR262C	1494.16	0.230127	0.0998734			YCR106W		YHR120W			YER150W	2106.4	1.06876	8.78763e-42		YER150W	2106.4	-0.176677	0.031166			YHR199C-A		YOR237W
	YBR253W	986.064	0.34468	0.0390948		YBR263W	1751.59	0.573161	7.87327e-06			YCR066W		YER074W			YER151C	5336.14	-0.17978	0.00380129		YER151C	5336.14	-0.0464224	0.467708			YDR008C		YDR459C
	YBR254C	688.353	0.0444235	0.861002		YBR264C	656.099	-0.174913	0.307287			YJR039W		YBL011W			YER152C	3289.64	-0.299881	9.18855e-06		YER152C	3289.64	-0.767254	3.04668e-32			YLR267W		YLR041W
	YBR255C-A	1470.15	0.524402	0.000104529		YBR265W	661.527	0.213423	0.19954			YHL047C		YPR010C-A			YER152W-A	10.7154	-0.157566	0.888029		YER152W-A	10.7154	-1.63757	0.1038			YDR342C		YGL261C
	YBR255W	261.093	0.679578	0.000445464		YBR267W	383.732	0.188413	0.326432			YDL183C		YOR335C			YER153C	616.269	0.133817	0.337992		YER153C	616.269	-0.104879	0.436798			YMR104C		YPR121W
	YBR256C	2641.29	0.927683	1.02948e-14		YBR268W	1594.83	0.480005	0.00048856			YGL184C		YBR131W			YER154W	3205.46	0.0139017	0.863609		YER154W	3205.46	-0.168771	0.014794			YOL164W		YKL108W
	YBR257W	293.265	-0.101114	0.617083		YBR269C	1202.63	0.10058	0.52485			YIL134C-A		YBR151W			YER155C	12529.6	-0.674354	1.51304e-50		YER155C	12529.6	-0.657999	5.17989e-50			YPL111W		YDR520C
	YBR258C	441.076	0.310257	0.107197		YBR270C	43.2955	-8.63696	4.7506e-08			YLR233C		YFL017W-A			YER156C	4210.13	-0.622624	7.88343e-24		YER156C	4210.13	-0.484405	6.58664e-16			YBR284W		YDL216C
	YBR259W	104.122	-0.00157097	0.995957		YBR271W	325.495	-0.11748	0.601707			YDR058C		YCR012W			YER157W	2518.33	-0.436	4.58985e-10		YER157W	2518.33	0.335091	4.06101e-07			YGL125W		YGR016W
	YBR260C	382.219	-0.116798	0.527324		YBR272C	719.069	-0.328247	0.0464004			YKL171W		YBR283C			YER158C	2447.28	-0.287156	0.00201386		YER158C	2447.28	-0.327225	0.000251785			YJL027C		YPL269W
	YBR261C	578.777	-0.125154	0.446919		YBR273C	538.977	-0.151139	0.406036			YOR062C		YNL302C			YER158W-A	29.2768	-0.977075	0.098173		YER158W-A	29.2768	-1.10469	0.0427357			YJL156W-A		YDR118W
	YBR262C	2126.15	0.692334	5.77183e-08		YBR274W	275.491	0.0406797	0.868418			YOR376W-A		YDL182W			YER159C	1962.55	0.369339	0.0781054		YER159C	1962.55	-0.174701	0.412901			YAL031W-A		YKL162C-A
	YBR263W	1235.39	-2.55319	3.27856e-79		YBR275C	222.145	-0.167235	0.480649			YDR438W		YKR092C			YER160C	2685.53	-1.29107	2.01827e-90		YER160C	2685.53	-1.95934	3.11377e-216			YOL104C		YNL063W
	YBR264C	746.585	0.489366	0.00141663		YBR276C	455.333	0.149978	0.439723			YLR010C		YPL089C			YER159C-A	155.92	-1.53679	2.20999e-08		YER159C-A	155.92	-3.0253	2.53275e-28			YOR381W		YPL264C
	YBR265W	748.295	0.12496	0.422237		YBR277C	12.6921	7.35774	1.24851e-05			YDR119W-A		YDL189W			YER161C	1988.69	-0.209158	0.014512		YER161C	1988.69	0.472152	1.80594e-09			YPL281C		YGL075C
	YBR267W	367.72	-0.348149	0.0585986		YBR278W	283.302	-0.803457	0.000109093			YER101C		YIL043C			YER162C	947.886	0.195083	0.128938		YER162C	947.886	1.0213	3.78746e-19			YCL010C		YOR023C
	YBR268W	1566.61	-0.56995	2.7898e-05		YBR279W	485.585	0.212534	0.233208			YHR180W		YNL112W			YER163C	1513	0.523787	2.45625e-11		YER163C	1513	-0.0347975	0.681628			YCL040W		YNL203C
	YBR269C	1403.58	0.308748	0.0267737		YBR280C	48.8016	-0.0350912	0.943517			YCL049C		YGR175C			YER164W	5258.7	-0.549443	3.00357e-25		YER164W	5258.7	-0.17332	0.00085869			YAR050W		YCR101C
	YBR270C	98.0986	9.80598	9.75641e-11		YBR281C	689.978	0.234703	0.14721			YKL186C		YBR157C			YER165W	12869.4	-1.42807	4.8768e-139		YER165W	12869.4	-1.49973	2.00158e-157			YOR010C		YLR132C
	YBR271W	268.811	-0.495922	0.0158511		YBR282W	592.108	0.25194	0.128212			YAL064W-B		YIL014C-A			YER165C-A	2.92127	1.03706	0.604725		YER165C-A	2.92127	-0.469948	0.817787			YDR379C-A		YDR314C
	YBR272C	846.329	0.708556	9.44362e-06		YBR283C	1551.5	0.758232	1.4781e-08			YJR073C		YGR017W			YER166W	8512.54	-0.435546	2.21623e-19		YER166W	8512.54	-0.360917	2.41774e-14			YOL058W		YHL010C
	YBR273C	437.688	-0.512653	0.00188699		YBR284W	77.2263	-1.11146	0.00078617			YCL005W		YDL067C			YER167W	4880.73	-0.228176	0.000131919		YER167W	4880.73	0.190582	0.000923663			YLR236C		YOR298W
	YBR274W	280.209	-0.0131327	0.952122		YBR286W	956.309	0.935723	3.70268e-11			YIR017C		YER056C-A			YER168C	2299.39	0.00726209	0.936792		YER168C	2299.39	0.509199	3.49693e-12			YBR293W		YLR082C
	YBR275C	216.42	0.0736973	0.745262		YBR287W	5002.74	0.211216	0.109357			YNL109W		YDL128W			YER170W	790.93	0.332338	0.00271326		YER170W	790.93	0.497338	1.69876e-06			YCR015C		YOL157C
	YBR276C	402.371	-0.583575	0.000683185		YBR288C	585.877	0.0224565	0.910112			YOL117W		YIL008W			YER171W	2811.65	-0.121171	0.0679724		YER171W	2811.65	0.125904	0.0442319			YPL238C		YPL168W
	YBR277C	12.7948	-7.38075	6.21105e-06		YBR289W	68.5679	-0.505644	0.161306			YEL028W		YDL233W			YER172C	6295.35	-0.222224	5.45502e-05		YER172C	6295.35	0.0357337	0.535465			YPL280W		YPL164C
	YBR278W	318.342	1.04362	2.24692e-07		YBR290W	838.558	0.109441	0.534329			YCR068W		YLR112W			YER172C-A	2.44892	2.29697	0.336255		YER172C-A	2.44892	0.878431	0.719338			YHR033W		YMR187C
	YBR279W	496.196	-0.169269	0.313803		YBR291C	769.078	-0.0693384	0.722005			YPL171C		YLR378C			YER173W	1484.81	1.03295	4.332e-35		YER173W	1484.81	1.46929	1.04112e-74			YMR158C-A		YCL016C
	YBR280C	54.7771	0.328349	0.399204		YBR292C	431.292	-0.55033	0.00211111			YMR194C-B		YIL085C			YER174C	1648.7	-0.65201	2.79279e-17		YER174C	1648.7	-0.202449	0.00643471			YLR377C		YDR273W
	YBR281C	741.784	-0.0386035	0.810951		YBR293W	137.415	-1.07724	2.0212e-05			YOR381W		YEL044W			YER175C	1551.6	1.14573	2.1773e-42		YER175C	1551.6	1.22829	1.27e-51			YBR277C		YOR064C
	YBR282W	636.737	-0.0537116	0.750202		YBR295W	238.125	-0.650144	0.00174978			YGR239C		YCR015C			YER175W-A	85.9424	1.86863	2.25608e-08		YER175W-A	85.9424	1.88603	5.52113e-09			YLR466C-A		YMR063W
	YBR283C	1453.9	-1.05879	1.33559e-15		YBR296C	45.42	1.5631	0.00021758			YMR204C		YJL145W			YER176W	2575.55	-0.521515	4.79583e-09		YER176W	2575.55	0.337127	8.95699e-05			YER189W		YGR075C
	YBR284W	143.642	2.27912	1.21284e-17		YBR297W	328.664	-0.736698	4.85949e-05			YDR379C-A		YKL082C			YER177W	12461.7	-0.372162	3.41027e-13		YER177W	12461.7	-1.12095	3.8211e-111			YAR030C		YLL056C
	YBR286W	785.534	-2.05024	1.37725e-47		YBR298C	224.315	-1.99304	1.12815e-20			YNL276C		YER153C			YER178W	12541	-0.766188	1.94618e-60		YER178W	12541	-1.53985	1.81344e-244			YGR288W		YER187W
	YBR287W	4035.5	-1.0227	6.12113e-18		YCL001W	4169.87	0.546364	1.95718e-05			YAR023C		YHR107C			YER179W	159.116	-0.0849884	0.769854		YER179W	159.116	0.0888292	0.733481			YCR076C		YLL003W
	YBR288C	528.245	-0.366261	0.0242835		YCL002C	1225.69	-0.0604087	0.738222			YIL087C		YDR105C			YER180C	956.21	0.40491	7.12405e-05		YER180C	956.21	0.911064	1.32115e-21			YMR007W		YIL012W
	YBR289W	57.8675	0.0375737	0.925272		YCL004W	177.442	-0.424295	0.0754118			YGL010W		YKR074W			YER180C-A	179.194	0.37827	0.105664		YER180C-A	179.194	0.678349	0.00157378			YLR232W		YDR043C
	YBR290W	941.798	0.198223	0.218835		YCL005W	804.253	-0.11444	0.536026			YMR090W		YGR105W			YER181C	26.6884	-0.588807	0.319408		YER181C	26.6884	0.334231	0.535465			YIL024C		YBL084C
	YBR291C	1601.92	1.69533	2.80895e-35		YCL005W-A	8619.59	1.2541	4.67781e-30			YNL046W		YOR152C			YER182W	1117.2	0.159471	0.097358		YER182W	1117.2	0.0328998	0.733995			YDL021W		YHR212C
	YBR292C	500.15	0.877427	6.98101e-08		YCL007C	97.1069	2.08164	1.22803e-11			YJL163C		YPR073C			YER183C	1213.34	-0.343694	6.92461e-05		YER183C	1213.34	-0.0704285	0.415982			YJL221C		YLR266C
	YBR293W	231.441	2.06854	9.9499e-23		YCL008C	1115.66	-0.306194	0.0426076			YBR098W		YBR154C			YER184C	1799.95	1.07112	3.00489e-41		YER184C	1799.95	1.6104	4.25849e-98			YHR180W		YDL196W
	YBR295W	222.672	0.468603	0.0240803		YCL009C	12489.1	0.368732	0.0072019			YKR091W		YDR527W			YER185W	408.963	1.99771	5.87047e-35		YER185W	408.963	1.66673	9.30813e-26			YCL056C		YPL005W
	YBR296C	34.2205	-8.78648	1.63723e-08		YCL010C	419.949	-0.86263	3.19123e-07			YJL185C		YBR101C			YER186C	1321.82	0.292094	0.000503944		YER186C	1321.82	0.550343	2.75014e-12			YPL166W		YDL176W
	YBR296C-A	38.387	8.45218	4.78017e-08		YCL011C	987.138	0.617159	1.23361e-05			YMR291W		YGL099W			YER187W	124.014	0.00123603	0.996531		YER187W	124.014	1.12088	1.1319e-05			YLR173W		YMR257C
	YBR297W	701.856	2.21632	6.14028e-49		YCL012C	996.768	-0.147274	0.372303			YNL230C		YER133W			YER188W	168.689	-0.580148	0.00839743		YER188W	168.689	-0.16426	0.44883			YBR020W		YAR029W
	YBR298C	598.713	3.6061	1.10795e-83		YCL014W	255.948	-0.0285958	0.907489			YDR530C		YOL101C			YER188C-A	139.506	0.856115	0.000640068		YER188C-A	139.506	0.174151	0.507385			YDL169C		YKL123W
	YBR299W	15.515	7.14535	8.63573e-06		YCL016C	138.252	-1.1204	1.16987e-05			YOR374W		YGR192C			YER189W	110.324	1.42698	7.59975e-07		YER189W	110.324	1.3669	8.95388e-07			YOR348C		YPR111W
	YBR300C	12.3778	6.81927	3.01209e-05		YCL017C	2048.79	-0.216923	0.110928			YOR343C		YER188W			YER190W	1743.66	0.376382	0.041681		YER190W	1743.66	0.167887	0.372712			YIL155C		YMR280C
	YCL001W	6085.46	0.526598	3.31795e-05		YCL018W	739.389	0.867423	7.44991e-08			YDL204W		YOL034W			YER190C-B	47.6576	0.727757	0.114676		YER190C-B	47.6576	-2.407	1.6179e-06			YOL106W		YPL133C
	YCL002C	1813.33	0.9998	1.09879e-12		YCL019W	408.523	1.49731	8.90551e-20			YEL072W		YOL030W			YJL091C	3621.46	0.0586198	0.472378		YJL091C	3621.46	-0.328355	7.48495e-06			YCR063W		YMR135C
	YCL004W	301.016	1.55553	5.77957e-17		YCL024W	226.219	-0.186591	0.439458			YLL019C		YNL110C			YJL026W	10337.4	-1.08056	5.02435e-101		YJL026W	10337.4	-1.50672	1.36102e-201			YCL030C		YHR211W
	YCL005W	1876.55	1.93595	2.08682e-46		YCL025C	1114.4	0.523422	0.00014509			YCL024W		YGR271C-A			YJL026C-A	3.11825	-0.226028	0.910723		YJL026C-A	3.11825	0.025322	0.988833			YHR160C		YNL146C-A
	YCL005W-A	10419.6	-0.50944	0.000119554		YCL026C-A	35.762	1.78631	0.000137426			YLL060C		YGR020C			YJR125C	3106.42	-0.0875589	0.211874		YJR125C	3106.42	-0.110658	0.0906013			YOL160W		YFR052C-A
	YCL007C	117.695	-1.04183	0.000182685		YCL026C-B	134.736	0.651806	0.0175309			YNL146W		YDL095W			YJL225C	513.55	0.736607	0.0680136		YJL225C	513.55	0.576759	0.148173			YNL117W		YPL003W
	YCL008C	1983.5	1.55944	1.83759e-35		YCL027W	27.7645	8.48224	1.25076e-07			YCR088W		YDR161W			YJL223C	309.981	0.00765383	0.96894		YJL223C	309.981	0.622148	0.000108231			YCL073C		YOL158C
	YCL009C	14000.4	-0.0380633	0.766945		YCL028W	1187.13	0.150057	0.344674			YMR137C		YGR140W			YJL222W	6637.92	0.399548	6.34778e-15		YJL222W	6637.92	0.758095	5.72181e-53			YOL047C		YBR280C
	YCL010C	828.201	2.17559	2.3458e-49		YCL029C	327.604	-0.702887	0.000340227			YGL222C		YOR287C			YJL221C	445.736	1.41015	5.0509e-23		YJL221C	445.736	0.991862	1.32693e-12			YCR107W		YJR159W
	YCL011C	1395.14	0.396856	0.00288859		YCL030C	618.378	-1.12551	2.64301e-13			YGL154C		YFL039C			YJL219W	120.181	0.379057	0.238969		YJL219W	120.181	-0.704971	0.0205178			YCR085W		YJL070C
	YCL012C	2104.11	1.77263	3.20077e-40		YCL031C	2607.33	0.0462992	0.774493			YGL063W		YGR203W			YJL218W	314.544	-0.575598	0.00155636		YJL218W	314.544	-0.817763	8.54986e-07			YOR019W		YJL181W
	YCL014W	353.528	0.822746	3.06371e-06		YCL032W	428.376	0.034225	0.87266			YOR134W		YDR084C			YJL217W	4879.32	-0.255755	1.50399e-05		YJL217W	4879.32	-0.862822	1.24697e-52			YML100W		YBR217W
	YCL016C	290.349	2.49043	4.34421e-34		YCL033C	1205.42	0.121449	0.511268			YER053C-A		YDL046W			YJL216C	385.917	1.55044	1.32077e-23		YJL216C	385.917	1.81631	5.69699e-34			YML034C-A		YER139C
	YCL017C	2516.75	0.710263	3.34555e-09		YCL034W	512.306	-0.0265075	0.895487			YDR124W		YJL016W			YJL215C	153.281	1.73317	6.67253e-11		YJL215C	153.281	1.8882	2.2562e-13			YLR151C		YLR124W
	YCL018W	1639.54	1.26891	3.45267e-18		YCL035C	5211.14	-0.151423	0.291368			YKR045C		YCR031C			YJL214W	269.179	0.609079	0.00122757		YJL214W	269.179	0.776878	1.22067e-05			YKR103W		YDR480W
	YCL019W	579.803	-0.139986	0.403231		YCL036W	325.395	0.430849	0.0217877			YPR153W		YCR017C			YJL213W	1488.79	-0.274134	0.0115079		YJL213W	1488.79	1.09146	7.30446e-29			YGL090W		YOR070C
	YCL020W	18.4541	7.39557	3.36655e-06		YCL037C	2926.57	-0.590858	1.70091e-06			YNL277W-A		YLR084C			YJL212C	7211.66	0.185927	0.00107904		YJL212C	7211.66	-0.476396	3.11295e-18			YHR139C		YDR014W
	YCL024W	488.663	1.84191	4.91461e-30		YCL038C	265.317	-0.00268265	0.994367			YKL065W-A		YPL087W			YJL211C	135.595	0.548905	0.0384911		YJL211C	135.595	-0.113444	0.68048			YGR213C		YBR152W
	YCL025C	2030.48	1.04652	4.86256e-16		YCL039W	332.6	0.375982	0.047151			YPL111W		YJL213W			YJL210W	1991.8	0.444935	8.78869e-08		YJL210W	1991.8	-0.0867733	0.31842			YAL064C-A		YLR123C
	YCL026C-A	71.7462	0.65558	0.0572895		YCL040W	1414.15	0.0325506	0.870194			YFR020W		YBR205W			YJL209W	1919.19	-0.32425	4.22233e-05		YJL209W	1919.19	1.05359	1.30928e-48			YCR036W		YKL098W
	YCL026C-B	139.944	-0.542126	0.0429948		YCL042W	107.45	-0.477976	0.100588			YCR036W		YGL097W			YJL208C	2891.69	-0.353377	8.00011e-08		YJL208C	2891.69	-0.172173	0.00729799			YDR082W		YNL230C
	YCL027W	85.8249	1.04415	0.000461066		YCL043C	16425.2	0.632943	9.75496e-09			YDR263C		YOR051C			YJL207C	5915.82	-0.568478	4.5836e-29		YJL207C	5915.82	0.0224994	0.679336			YOL084W		YLL055W
	YCL028W	1295.35	0.08294	0.584404		YCL044C	766.6	0.120242	0.480402			YOL032W		YGR285C			YJL206C	1669.52	0.0348992	0.706978		YJL206C	1669.52	0.93983	3.60386e-35			YBR184W		YLR135W
	YCL029C	378.668	1.00924	2.18692e-09		YCL045C	930.659	0.695891	4.29463e-07			YOL126C		YBL009W			YJL205C	815.108	-0.414627	0.000125473		YJL205C	815.108	-0.961324	6.51787e-21			YOR062C		YJL213W
	YCL030C	626.09	1.1357	4.69365e-14		YCL047C	503.128	0.374819	0.0304248			YCL012C		YLR110C			YJL204C	1736.73	0.316355	2.82325e-05		YJL204C	1736.73	0.522825	1.7859e-13			YOR380W		YDR530C
	YCL031C	3576.96	0.74788	1.19684e-09		YCL048W-A	43.8747	-8.65646	4.40576e-08			YDR380W		YBL069W			YJL203W	880.72	-0.00839656	0.952177		YJL203W	880.72	0.472346	2.41415e-05			YCL018W		YDL142C
	YCL032W	785.101	1.37514	7.54742e-22		YCL049C	800.109	-0.129621	0.447977			YPL113C		YMR039C			YJL202C	13.0662	0.188703	0.829475		YJL202C	13.0662	-0.284683	0.724699			YOL091W		YER111C
	YCL033C	1629.91	0.656535	7.91342e-05		YCL050C	3728.48	0.160906	0.298184			YOL058W		YER178W			YJL201W	3198.37	0.244735	0.000393711		YJL201W	3198.37	1.01226	7.436e-56			YKL106C-A		YNL025C
	YCL034W	853.523	1.22441	9.66358e-19		YCL051W	454.81	-0.236501	0.188619			YNL289W		YJL117W			YJL200C	7913.88	-0.0825798	0.181621		YJL200C	7913.88	-0.413348	2.81967e-13			YOR366W		YKL202W
	YCL035C	10162.1	1.62537	7.62943e-48		YCL052C	576.523	0.0721424	0.700844			YOR028C		YLR364W			YJL199C	318.237	1.54883	7.66868e-20		YJL199C	318.237	0.745643	1.09479e-05			YMR096W		YER047C
	YCL036W	430.288	0.362901	0.0360756		YCL054W	809.427	0.402086	0.0081133			YCR032W		YCL045C			YJL198W	4408.42	-0.499986	1.42131e-18		YJL198W	4408.42	-0.224432	5.35271e-05			YJR108W		YIL042C
	YCL037C	3553.1	1.01381	1.19529e-15		YCL054W-A	2399.43	0.358588	0.0354734			YER092W		YOL097W-A			YJL197W	3599.22	-0.628341	2.45037e-22		YJL197W	3599.22	0.13134	0.0404922			YCL012C		YPL155C
	YCL038C	460.93	1.29719	1.78871e-13		YCL055W	213.63	0.307681	0.183161			YPL089C		YDR120C			YJL196C	2293.34	-0.482111	1.65424e-10		YJL196C	2293.34	-1.41025	3.7825e-82			YOR374W		YJR136C
	YCL039W	768.861	1.61345	1.31285e-29		YCL056C	616.843	-0.821643	6.92225e-08			YCR023C		YER009W			YJL195C	30.8521	2.15332	0.00145916		YJL195C	30.8521	1.34224	0.0461492			YIL046W-A		YGR188C
	YCL040W	2775.29	1.51107	6.12496e-32		YCL057C-A	3075.52	0.776722	2.27124e-09			YKR069W		YBR233W-A			YJL194W	2138.1	-0.0729641	0.379876		YJL194W	2138.1	1.26369	4.61766e-72			YNL125C		YOL100W
	YCL042W	169.754	1.45985	1.0858e-10		YCL057W	1532.09	-0.0166152	0.917664			YLR273C		YHR042W			YJL193W	1862.92	0.0230903	0.807743		YJL193W	1862.92	0.252078	0.00175272			YKL222C		YOR005C
	YCL043C	19122.5	-0.151292	0.196118		YCL058W-A	958.807	0.165348	0.295459			YDR384C		YKL047W			YJL192C	4213.84	-0.332888	5.73264e-08		YJL192C	4213.84	-0.825418	3.86319e-44			YOR343C		YPL191C
	YCL044C	1206.34	0.999211	2.32904e-14		YCL059C	771.105	0.546635	0.000257914			YOR358W		YOR230W			YJL191W	6644.31	-0.876599	3.68975e-47		YJL191W	6644.31	-0.599666	5.18435e-24			YMR090W		YFL056C
	YCL045C	1147.18	-0.0314571	0.838952		YCL061C	120.899	0.0320086	0.923068			YHL006C		YJL010C			YJL190C	8139.79	-0.748095	2.70531e-42		YJL190C	8139.79	-1.51026	1.3179e-171			YKR091W		YKR004C
	YCL047C	723.655	0.612767	4.11858e-05		YCL063W	406.846	0.437117	0.0260192			YMR075W		YDR222W			YJL189W	4098.95	-0.486113	7.12283e-18		YJL189W	4098.95	-1.57113	2.11872e-176			YLR004C		YOR114W
	YCL048W-A	446.914	11.9937	1.05025e-15		YCL064C	1321.44	-1.37115	6.55566e-27			YGL258W		YNR008W			YJL188C	9.3792	-0.9402	0.394959		YJL188C	9.3792	-1.50142	0.138575			YOR180C		YLR288C
	YCL049C	1901.7	1.97688	1.17673e-53		YCR002C	773.779	-0.299013	0.0570995			YLR136C		YGR103W			YJL187C	3006.9	-0.0448358	0.510476		YJL187C	3006.9	0.447484	2.0458e-14			YMR030W		YIR015W
	YCL050C	5229.63	0.71043	4.09026e-07		YCR003W	1396.5	-0.0755106	0.643196			YIR018W		YDR307W			YJL186W	6811.62	-0.220155	3.30505e-05		YJL186W	6811.62	-0.457673	2.39129e-19			YOR161C-C		YPL124W
	YCL051W	661.807	1.10137	4.8887e-14		YCR004C	1622.17	0.113409	0.462181			YHR104W		YHR029C			YJL185C	661.339	1.15276	6.44026e-23		YJL185C	661.339	0.682852	3.01562e-09			YCL039W		YHR006W
	YCL052C	824.062	0.821679	3.24364e-09		YCR005C	560.778	1.62251	4.33913e-23			YKR077W		YJR104C			YJL184W	1461.81	0.335783	0.000142873		YJL184W	1461.81	-0.165072	0.0601152			YIR029W		YAL048C
	YCL054W	943.184	0.0440497	0.779611		YCR006C	114.473	-0.865242	0.00156649			YHL002C-A		YGL055W			YJL183W	3598.23	-0.562154	8.15142e-22		YJL183W	3598.23	-0.304751	7.28257e-08			YCL042W		YLR451W
	YCL054W-A	1358.31	-14.1036	2.83311e-21		YCR007C	86.6645	-0.940543	0.00252315			YPL066W		YLR175W			YJL182C	4.10712	0.0161383	0.99167		YJL182C	4.10712	-0.945205	0.538157			YFL041W-A		YMR104C
	YCL055W	327.366	0.804705	8.25728e-06		YCR008W	1551.8	-0.103389	0.557972			YKR075C		YBL055C			YJL181W	1566.83	0.0333523	0.739807		YJL181W	1566.83	1.10179	2.02243e-41			YCL024W		YDL113C
	YCL056C	1410.46	2.39968	9.441e-74		YCR009C	2032.31	-0.037124	0.818317			YHR018C		YLR256W			YJL180C	1426.2	-0.371078	1.00817e-05		YJL180C	1426.2	-0.179928	0.0262537			YPR196W		YDL133W
	YCL057C-A	4650.55	0.461735	0.000456985		YCR011C	382.48	0.614196	0.000369569			YMR271C		YGL031C			YJL179W	1804.72	0.136744	0.0784748		YJL179W	1804.72	-0.397152	3.08995e-08			YIL013C		YKL163W
	YCL057W	1962.25	0.638535	4.40695e-07		YCR012W	262895	0.75871	1.31379e-09			YNL116W		YMR301C			YJL178C	3037.75	-0.230294	0.00014863		YJL178C	3037.75	-0.42388	1.58075e-13			YDR171W		YMR293C
	YCL058W-A	1263	0.558257	3.78572e-05		YCR015C	1087.3	0.741097	4.27318e-07			YOR302W		YNR032C-A			YJL177W	7731.9	-0.756731	1.23826e-39		YJL177W	7731.9	-1.20897	6.46476e-102			YMR316C-B		YMR163C
	YCL059C	1027.62	0.295922	0.036309		YCR016W	598.105	0.376907	0.0248489			YBR291C		YHR030C			YJL176C	3579.48	-0.386595	2.09662e-07		YJL176C	3579.48	0.050685	0.516828			YCR023C		YKL065W-A
	YCL061C	238.283	1.52565	1.49589e-12		YCR017C	2297.45	0.707162	3.08313e-07			YER064C		YPR133W-A			YJL175W	3.94789	0.183273	0.9138		YJL175W	3.94789	0.00504111	0.997437			YPL066W		YGL212W
	YCL063W	489.448	0.106786	0.54143		YCR018C-A	56.6501	-0.414996	0.332987			YJL088W		YBL005W			YJL174W	6164.31	-0.0614419	0.277901		YJL174W	6164.31	-0.208887	4.99657e-05			YGR131W		YER040W
	YCL064C	447.334	-2.28636	5.60889e-44		YCR019W	329.898	-0.105461	0.643592			YER039C-A		YML101C			YJL173C	1249.04	-0.502158	3.16041e-08		YJL173C	1249.04	-0.945478	1.08993e-27			YHR022C-A		YKR005C
	YCR002C	1049.3	1.00162	1.562e-13		YCR020C-A	1151.27	-0.347582	0.0172774			YML128C		YMR297W			YJL172W	12973.3	-0.738967	2.14955e-61		YJL172W	12973.3	-1.1946	1.67937e-163			YCL068C		YPR001W
	YCR003W	2084.4	1.03008	1.04217e-16		YCR020W-B	2296.63	-1.36867	8.74965e-29			YDR147W		YDL171C			YJL171C	7995.49	-0.874743	1.5841e-62		YJL171C	7995.49	-0.821927	4.73055e-59			YGL063W		YGL136C
	YCR004C	2324.85	0.797081	2.35731e-10		YCR021C	339.181	3.76728	7.8409e-17			YOR380W		YOR252W			YJL170C	170.883	-5.74071	3.20957e-25		YJL170C	170.883	-0.576377	0.00526336			YPL113C		YHR159W
	YCR005C	1229.84	0.915237	3.00599e-11		YCR023C	1108.26	-0.447659	0.00113792			YFR027W		YHR081W			YJL169W	11.1296	-2.99632	0.00267001		YJL169W	11.1296	-1.80048	0.0222833			YKR106W		YDR102C
	YCR006C	385.972	3.07368	2.19943e-54		YCR024C	205.09	-0.210123	0.41737			YJL116C		YGR148C			YJL168C	2863.94	0.00568482	0.945994		YJL168C	2863.94	1.00287	7.10993e-52			YIL059C		YJL209W
	YCR007C	371.482	3.52036	3.76406e-61		YCR024C-A	4258.81	0.211916	0.224863			YBR217W		YER132C			YJL167W	9072.07	-0.276525	1.08555e-08		YJL167W	9072.07	-0.79441	1.67033e-64			YNR034W		YGR278W
	YCR008W	1713.95	0.349643	0.0176043		YCR024C-B	28.7024	-8.04411	5.3314e-07			YHR161C		YDR043C			YJL166W	2944.14	-0.188244	0.00396854		YJL166W	2944.14	-0.715945	1.94016e-31			YKR033C		YIL084C
	YCR009C	2908.37	0.908343	1.21357e-13		YCR026C	261.367	0.411022	0.0425779			YMR114C		YPL020C			YJL165C	3750.18	-0.605563	5.29998e-23		YJL165C	3750.18	0.211942	0.000336546			YHL049C		YNL279W
	YCR011C	590.831	0.617785	5.85319e-05		YCR027C	584.483	-0.381426	0.0333474			YHL036W		YDR072C			YJL164C	2052.96	0.0579529	0.480434		YJL164C	2052.96	0.426054	1.4938e-09			YLR152C		YDL154W
	YCR012W	328705	-0.0371148	0.794025		YCR028C	1112.06	-0.834347	3.72104e-09			YGL156W		YDL227C			YJL163C	972.274	0.862879	5.04778e-15		YJL163C	972.274	0.755461	1.74751e-12			YKL169C		YLR094C
	YCR014C	33.7564	8.26684	9.91452e-08		YCR028C-A	7409.08	0.212905	0.113081			YLR181C		YDR352W			YJL162C	1290.17	0.663412	2.38753e-14		YJL162C	1290.17	0.978514	5.01561e-32			YHR056W-A		YCR025C
	YCR015C	1538.88	0.317127	0.0288243		YCR030C	1142.35	0.21806	0.146969			YBR108W		YKL152C			YJL161W	715.739	2.33434	1.33585e-71		YJL161W	715.739	0.816292	8.20353e-10			YBR019C		YIR025W
	YCR016W	738.644	0.224748	0.163363		YCR031C	48051.6	0.707752	9.94094e-07			YEL030W		YNL149C			YJL160C	89.4152	-0.111123	0.754064		YJL160C	89.4152	-0.436208	0.158895			YLL060C		YPR083W
	YCR017C	3813.17	0.727596	5.2843e-10		YCR032W	204.752	-0.529112	0.0158064			YBR071W		YDR518W			YJL159W	48426.7	0.448429	3.86312e-17		YJL159W	48426.7	-0.662968	3.63185e-36			YMR103C		YBL025W
	YCR018C-A	168.625	2.57169	1.84381e-22		YCR033W	410.312	0.249288	0.203379			YOR181W		YJL208C			YJL158C	18391.9	-0.0538563	0.29092		YJL158C	18391.9	-1.25884	8.5704e-164			YGR109C		YLR453C
	YCR019W	606.968	1.48084	8.61297e-23		YCR034W	3697.97	1.15987	3.17074e-19			YIR023W		YML105C			YJL157C	5887.84	-0.470344	1.34834e-14		YJL157C	5887.84	0.605479	4.40873e-25			YHR210C		YMR189W
	YCR020C	14.2572	7.02337	1.3604e-05		YCR035C	1048.98	0.226872	0.131346			YOR304C-A		YIR005W			YJL156W-A	95.3442	1.45432	1.06873e-06		YJL156W-A	95.3442	-0.104472	0.753536			YLR467W		YAL065C
	YCR020C-A	1840.24	1.38177	1.46499e-27		YCR036W	733.187	-0.76129	1.50302e-07			YLR042C		YHL033C			YJL156C	2893.03	-0.0797332	0.237985		YJL156C	2893.03	0.409151	7.64076e-12			YNL114C		YBR050C
	YCR020W-B	3448.59	2.11732	1.35205e-72		YCR037C	545.267	-0.915269	5.5178e-09			YML003W		YPL207W			YJL155C	1733.62	0.69949	1.47959e-17		YJL155C	1733.62	0.835656	1.11253e-26			YHR189W		YPL214C
	YCR021C	407.727	-1.82612	6.63928e-15		YCR042C	424.241	-0.5032	0.00324887			YCL035C		YNL286W			YJL154C	4673.11	-0.284525	8.89274e-08		YJL154C	4673.11	0.17129	0.000842949			YKR075C		YER041W
	YCR022C	7.13172	6.02388	0.000467247		YCR043C	7578.62	-0.068707	0.618751			YBR008C		YDR378C			YJL153C	2891.77	1.89185	5.09417e-82		YJL153C	2891.77	1.51595	4.4634e-56			YMR320W		YML005W
	YCR023C	2064.56	1.75302	3.65114e-47		YCR044C	4012.63	-0.0559228	0.709548			YPL036W		YCL026C-B			YJL152W	33.6855	1.64757	0.00414046		YJL152W	33.6855	1.13162	0.0450671			YGR107W		YDL243C
	YCR024C	325.043	1.26133	5.34685e-10		YCR045W-A	111.215	-9.99736	1.09873e-10			YKL068W-A		YOR341W			YJL151C	4123.52	0.353678	5.49225e-09		YJL151C	4123.52	-1.10282	8.6763e-76			YOR364W		YLR151C
	YCR024C-A	4692.7	0.0544204	0.774355		YCR046C	2608.54	-0.617758	1.60451e-06			YPR046W		YGL245W			YJL150W	149.757	0.256359	0.345109		YJL150W	149.757	0.744731	0.00170221			YKL131W		YGL184C
	YCR024C-B	14.4762	7.04519	1.31652e-05		YCR047C	709.992	0.76509	4.7132e-07			YCL039W		YKR090W			YJL149W	2342.78	0.325587	3.529e-06		YJL149W	2342.78	0.994072	1.3729e-52			YCR022C		YLR381W
	YCR025C	18.6274	7.40953	3.9328e-06		YCR048W	723.062	0.0897811	0.63277			YKR021W		YGL203C			YJL148W	2538.39	-0.734897	5.55289e-17		YJL148W	2538.39	-0.522272	9.38221e-10			YNL203C		YMR107W
	YCR026C	393.148	0.692131	4.76101e-05		YCR051W	2019.97	-0.100135	0.500702			YPL229W		YJL165C			YJL147C	822.463	0.356498	0.00103978		YJL147C	822.463	0.874591	3.05563e-18			YMR114C		YMR151W
	YCR027C	852.968	1.22492	5.64254e-16		YCR052W	416.217	0.254898	0.162919			YDR253C		YMR276W			YJL146W	1910.95	0.42171	2.44914e-08		YJL146W	1910.95	1.26855	4.66915e-73			YKL037W		YNL036W
	YCR028C	1177.45	0.944622	3.20614e-13		YCR053W	4457.41	0.190258	0.144086			YPL024W		YJL121C			YJL145W	1963.65	-0.455581	1.27359e-10		YJL145W	1963.65	-0.692896	1.24077e-24			YEL023C		YNL187W
	YCR028C-A	10220.5	0.632841	1.51467e-07		YCR054C	445.292	0.0304552	0.887276			YHL032C		YNL135C			YJL144W	664.794	1.87893	5.23971e-33		YJL144W	664.794	1.58595	5.31445e-25			YMR063W		YDR332W
	YCR030C	2150.49	1.30706	7.40275e-28		YCR057C	1362.81	0.227431	0.123306			YDL196W		YKL078W			YJL143W	4875.13	-0.0350748	0.851216		YJL143W	4875.13	-0.932803	4.84559e-09			YHR069C-A		YPL233W
	YCR031C	61872.2	0.0854175	0.615012		YCR059C	1533.92	0.175509	0.281692			YIL136W		YPL086C			YJL142C	521.989	1.11772	1.40554e-16		YJL142C	521.989	0.732934	3.01413e-08			YNL144C		YBL112C
	YCR032W	370.904	1.76116	2.92113e-23		YCR060W	1570.46	0.880082	3.53153e-10			YPL116W		YDL234C			YJL141C	4780.16	1.09414	3.446e-72		YJL141C	4780.16	0.707247	8.87313e-32			YOR396W		YOL032W
	YCR033W	649.911	0.919975	3.44872e-09		YCR061W	501.041	1.07563	6.05639e-08			YIL132C		YMR027W			YJL140W	3258.09	-0.158276	0.0177792		YJL140W	3258.09	-0.484908	7.67247e-15			YJL105W		YDR108W
	YCR034W	4774.29	-0.227395	0.105794		YCR063W	253.009	-1.26723	2.27934e-10			YDR499W		YPR088C			YJL139C	2210.94	-0.0229334	0.787838		YJL139C	2210.94	0.0787001	0.300323			YKL050C		YKL168C
	YCR035C	1561.9	0.799404	2.17189e-10		YCR064C	53.8124	9.42705	2.15758e-09			YDR525W-A		YDL060W			YJL138C	11042.1	-0.758078	1.70437e-56		YJL138C	11042.1	-1.289	5.35683e-165			YNL093W		YDR451C
	YCR036W	1213.54	1.77693	4.52146e-39		YCR065W	167.537	-0.369526	0.158216			YBL074C		YPR020W			YJL137C	1251.08	-0.601482	6.02538e-12		YJL137C	1251.08	0.0899403	0.296851			YGR067C		YDR123C
	YCR037C	710.224	1.44891	3.1077e-22		YCR066W	102.261	-0.201843	0.536663			YLR457C		YIL078W			YJL136W-A	3.56994	0.811066	0.605644		YJL136W-A	3.56994	-1.2945	0.408585			YDR402C		YHR189W
	YCR042C	704.696	1.57755	1.47698e-25		YCR067C	903.215	-0.00868241	0.960928			YCR065W		YLR459W			YJL136C	5818.06	-0.421396	3.6399e-15		YJL136C	5818.06	-1.42879	4.76243e-163			YBR217W		YMR167W
	YCR043C	9522.23	0.636568	9.98749e-09		YCR068W	759.621	-1.1339	5.28309e-13			YER046W		YEL071W			YJL135W	294.529	0.32588	0.0789282		YJL135W	294.529	0.59591	0.000452651			YLL025W		YER162C
	YCR044C	4889.51	0.552109	1.19266e-05		YCR069W	1300.98	0.198563	0.179167			YNL328C		YKL117W			YJL134W	2744.95	-0.0823667	0.252598		YJL134W	2744.95	0.134956	0.0415587			YBR291C		YDR437W
	YCR045W-A	321.296	11.5176	1.51498e-14		YCR071C	540.713	0.288784	0.108813			YCR042C		YBR031W			YJL133C-A	2198.46	2.30065	3.07036e-168		YJL133C-A	2198.46	0.228258	0.0100968			YMR250W		YNR057C
	YCR046C	2982.56	0.907919	5.31187e-13		YCR072C	241.99	-0.13331	0.57779			YPL189C-A		YHR088W			YJL133W	3728.83	0.0267767	0.686132		YJL133W	3728.83	0.331347	4.31987e-09			YDR391C		YDL149W
	YCR047C	1060.29	0.437302	0.00190688		YCR073C	169.608	-0.717355	0.0022246			YGL090W		YHR005C-A			YJL132W	1526.27	1.05809	1.64566e-35		YJL132W	1526.27	1.06052	7.85014e-38			YBL074C		YML003W
	YCR047W-A	21.5623	7.62056	1.63913e-06		YCR073W-A	1129.48	-0.435756	0.00261262			YOR223W		YLR028C			YJL131C	699.123	0.0117039	0.940026		YJL131C	699.123	0.304423	0.0168021			YDL214C		YHL049C
	YCR048W	990.691	0.71133	2.06429e-07		YCR075C	933.501	-1.10393	4.51106e-14			YGR213C		YHR207C			YJL130C	29681	-0.934174	9.9428e-72		YJL130C	29681	-1.06551	2.84206e-94			YPR077C		YIL106W
	YCR050C	27.6801	7.98049	3.30526e-07		YCR075W-A	823.87	0.878689	1.4842e-09			YDL022W		YBL047C			YJL129C	5701.67	-1.00467	1.6459e-75		YJL129C	5701.67	0.0104512	0.861447			YJR073C		YGL066W
	YCR051W	3344.1	1.26572	3.18971e-27		YCR076C	410.048	-0.645303	0.00021535			YDR391C		YBR029C			YJL128C	4522.14	-0.116027	0.0417421		YJL128C	4522.14	0.20674	9.22881e-05			YLR178C		YKR052C
	YCR052W	502.552	0.265572	0.101356		YCR077C	1168.75	0.0636235	0.702117			YPL264C		YOR004W			YJL127W-A	2.50018	1.51645	0.436402		YJL127W-A	2.50018	0.136103	0.948356			YBR050C		YGL003C
	YCR053W	6527.01	0.788001	6.81062e-11		YCR079W	328.681	-0.0684192	0.760433			YKR052C		YGR156W			YJL127C-B	985.729	0.732896	1.03984e-15		YJL127C-B	985.729	-0.00169512	0.987383			YOR394C-A		YHR150W
	YCR054C	737.646	1.17157	1.51068e-13		YCR081C-A	13.1551	7.40459	1.00844e-05			YCL008C		YOL040C			YJL127C	1901.83	0.299767	0.000267921		YJL127C	1901.83	0.818749	2.47382e-26			YLR124W		YJL201W
	YCR057C	1584.33	0.188003	0.180365		YCR081W	346.738	-0.348528	0.069792			YPL119C		YCL043C			YJL126W	689.19	0.469824	3.57441e-05		YJL126W	689.19	0.5389	5.68293e-07			YGL184C		YBR259W
	YCR059C	2257.56	0.810574	1.22823e-11		YCR082W	2569.62	-0.496802	5.87301e-05			YJL150W		YER152C			YJL125C	1920.29	-0.541538	2.83674e-13		YJL125C	1920.29	0.0337746	0.662296			YNL289W		YBR203W
	YCR060W	2590.62	0.610562	3.99894e-06		YCR083W	654.586	0.0842833	0.643196			YCL004W		YPR074C			YJL124C	2672.65	-0.116913	0.0881697		YJL124C	2672.65	-0.323971	2.67196e-07			YCR038C		YER028C
	YCR061W	761.083	0.291115	0.0978062		YCR084C	1368.38	0.359612	0.00952966			YNL160W		YJL200C			YJL123C	3243.75	-0.687126	1.83267e-06		YJL123C	3243.75	-0.410057	0.00426374			YMR196W		YOL132W
	YCR063W	457.567	2.35506	1.66893e-42		YCR086W	147.685	-0.185316	0.510581			YMR063W		YGR199W			YJL122W	2289	-0.498093	4.9487e-11		YJL122W	2289	-0.549355	4.55177e-14			YDR545W		YPL141C
	YCR064C	73.4819	-1.48086	2.30195e-05		YCR087C-A	1815.68	0.11821	0.457466			YEL065W		YKL041W			YJL121C	4599.48	-1.12002	1.99084e-77		YJL121C	4599.48	-1.58867	1.8198e-161			YDR009W		YNR034W-A
	YCR065W	294.089	1.58137	1.83965e-12		YCR088W	444.642	-0.647511	0.000136026			YOR348C		YHR143W-A			YJL120W	18.2596	1.14281	0.106582		YJL120W	18.2596	0.807828	0.240134			YDR242W		YNL331C
	YCR066W	244.02	2.02954	2.04576e-22		YCR089W	173.559	-0.509692	0.0389043			YOL043C		YDL089W			YJL119C	235.39	0.673335	0.000251206		YJL119C	235.39	0.121688	0.527829			YCR020C-A		YFR034C
	YCR067C	1242.82	0.799015	8.06318e-10		YCR090C	1799	-0.129864	0.439207			YFL021W		YFR044C			YJL118W	1824.48	0.573916	4.91912e-12		YJL118W	1824.48	0.654696	3.95746e-16			YDL215C		YDR499W
	YCR068W	1146.55	1.92121	1.9037e-46		YCR091W	57.7581	-1.40193	0.000203771			YJR021C		YOR307C			YJL117W	3706.96	-0.953145	1.42282e-60		YJL117W	3706.96	-0.658668	1.24781e-32			YGR225W		YFR029W
	YCR069W	1569.84	0.311353	0.0181547		YCR092C	199.882	-0.112525	0.665249			YDR453C		YKL018C-A			YJL116C	1005.42	1.71244	9.71681e-66		YJL116C	1005.42	0.25117	0.0158088			YDR384C		YFR020W
	YCR071C	930.814	1.07481	1.49399e-14		YCR093W	1984.97	0.456551	0.000319407			YOR023C		YOL109W			YJL115W	773.531	0.271627	0.364141		YJL115W	773.531	0.613759	0.0271198			YGL015C		YJL168C
	YCR072C	276.713	0.464718	0.0162438		YCR094W	959.993	0.0759245	0.651358			YLR376C		YLR034C			YJL114W	178.212	1.96694	1.41411e-17		YJL114W	178.212	1.6119	1.08414e-12			YDR169C-A		YNL225C
	YCR073C	378.478	2.27659	5.753e-35		YCR095C	504.241	-0.0547332	0.790432			YFL049W		YLR185W			YJL113W	1410.15	1.92644	1.31416e-113		YJL113W	1410.15	1.96069	9.1528e-123			YBR285W		YDR379W
	YCR073W-A	1652.33	1.27232	7.70069e-25		YCR095W-A	85.0478	-1.02748	0.000844468			YBR138C		YGL139W			YJL112W	2224.97	0.169818	0.0163719		YJL112W	2224.97	0.884683	1.83338e-43			YMR159C		YML095C
	YCR075C	1812.4	2.34249	9.23689e-69		YCR096C	26.1772	-0.233037	0.706751			YPL166W		YLR332W			YJL111W	5269.49	-0.671096	1.66408e-21		YJL111W	5269.49	-0.583878	2.59627e-17			YCR066W		YDR219C
	YCR075W-A	1681.14	1.08731	4.03052e-16		YCR097W	776.311	0.48922	0.0016284			YCL061C		YJR048W			YJL110C	3998.66	1.17231	3.88259e-93		YJL110C	3998.66	1.34276	4.04526e-127			YDR406W-A		YGR040W
	YCR076C	881.078	2.15771	7.27019e-49		YCR098C	537.164	0.2749	0.103149			YGR015C		YBL093C			YJL109C	11888.9	-0.604096	1.7367e-29		YJL109C	11888.9	-0.358063	1.41827e-11			YKL065W-A		YLR329W
	YCR077C	1763.96	0.949343	4.0104e-14		YCR101C	356.111	-1.03767	4.11442e-09			YPL109C		YNL118C			YJL108C	797.866	0.436455	0.000117836		YJL108C	797.866	1.16961	3.78209e-29			YBL078C		YNL125C
	YCR079W	608.772	1.46617	2.54011e-21		YCR102C	17.3198	7.79985	2.10843e-06			YML107C		YDR086C			YJL107C	1072.72	0.682032	3.70919e-12		YJL107C	1072.72	1.56765	1.57423e-65			YGL235W		YLR363C
	YCR081C-A	13.2572	-7.42734	4.90991e-06		YCR106W	334.019	-0.0329169	0.892022			YBR223C		YJL097W			YJL106W	921.824	2.6038	9.41194e-97		YJL106W	921.824	2.28711	5.05501e-77			YCL032W		YOL043C
	YCR081W	545.503	1.3503	1.31981e-18		YDL001W	141.81	0.987081	4.97302e-05			YCL040W		YBR106W			YJL105W	170.98	1.24449	1.96109e-07		YJL105W	170.98	1.65153	3.16611e-13			YGR176W		YKR029C
	YCR082W	3195.75	0.982229	8.2889e-17		YDL002C	694.614	-0.314394	0.0659439			YHR209W		YOL121C			YJL104W	2817.49	-0.0640972	0.363177		YJL104W	2817.49	-0.629484	6.81886e-24			YNL014W		YBR228W
	YCR083W	741.417	0.244086	0.130123		YDL003W	345.492	-0.26188	0.178491			YDR448W		YOR303W			YJL103C	1349.51	0.364587	3.28595e-05		YJL103C	1349.51	1.07929	1.51323e-40			YJR021C		YJL149W
	YCR084C	1797.37	0.399752	0.00214381		YDL004W	11722.8	0.297121	0.0134769			YDR085C		YJR085C			YJL102W	1191.21	-0.33588	0.000870724		YJL102W	1191.21	0.131192	0.183162			YPL223C		YOR162C
	YCR085W	15.7236	7.16464	8.03245e-06		YDL005C	461.916	-0.413417	0.0246062			YIR029W		YDR326C			YJL101C	4900.32	-0.412033	2.49283e-13		YJL101C	4900.32	-0.628205	1.31266e-30			YLR461W		YBR156C
	YCR086W	360.817	2.06192	2.51025e-30		YDL006W	537.542	0.0233214	0.907324			YJL065C		YCL011C			YJL100W	1708.42	0.257997	0.00106331		YJL100W	1708.42	0.729992	1.53961e-23			YPR184W		YAL063C
	YCR087C-A	2322.32	0.524146	9.10555e-05		YDL007W	1663.57	0.291289	0.0311571			YBR145W		YOR274W			YJL099W	2178.99	-0.00314832	0.96894		YJL099W	2178.99	0.523984	1.3031e-15			YJR115W		YJL221C
	YCR087W	12.5843	6.84321	2.68607e-05		YDL008W	1546.53	-0.0197048	0.913426			YBL010C		YJL050W			YJL098W	5090.28	-0.620655	1.68692e-31		YJL098W	5090.28	0.238283	3.31637e-06			YKR045C		YPL077C
	YCR088W	797.686	1.83517	1.74069e-36		YDL009C	148.553	-0.44743	0.0849433			YCR019W		YMR145C			YJL097W	2816.81	-0.154176	0.0390682		YJL097W	2816.81	-1.11955	1.21518e-57			YJL089W		YDR249C
	YCR089W	807.343	3.35457	8.6123e-88		YDL010W	696.789	0.167644	0.323582			YGR142W		YOR099W			YJL096W	1738.1	-0.132056	0.0979911		YJL096W	1738.1	-0.0943849	0.214379			YJL110C		YJR053W
	YCR090C	2478.29	0.898335	5.7258e-11		YDL012C	1104.51	0.213031	0.151353			YPL017C		YDR454C			YJL095W	3071.92	-0.624193	6.92745e-24		YJL095W	3071.92	-0.151592	0.0125915			YOR072W		YER098W
	YCR091W	170.292	3.27053	2.13679e-32		YDL013W	323.412	-0.172701	0.421784			YLR120W-A		YCR011C			YJL094C	4117.92	-0.223303	0.00128754		YJL094C	4117.92	-0.0583647	0.413613			YPR202W		YDR515W
	YCR092C	285.984	0.965643	2.95467e-07		YDL014W	2757.94	0.596606	1.17366e-05			YIL166C		YER074W-A			YJL093C	3540.7	0.491386	1.15655e-13		YJL093C	3540.7	0.389431	1.98504e-09			YNL328C		YJR022W
	YCR093W	2806.63	0.511603	1.84853e-05		YDL015C	4381.29	0.229941	0.0842444			YDL020C		YIL096C			YJL092W	3369.44	-0.382342	1.76897e-10		YJL092W	3369.44	0.0465174	0.452895			YKL096W		YDR118W-A
	YCR094W	1383.07	0.836894	8.28951e-09		YDL017W	196.016	0.123804	0.625919			YBR085C-A		YDR248C			YJL090C	2369.91	0.579834	6.71553e-17		YJL090C	2369.91	0.891317	1.14906e-40			YKR104W		YPL055C
	YCR095C	768.619	1.05801	4.78463e-12		YDL018C	954.427	-0.192206	0.240906			YIL023C		YKL084W			YJL089W	514.239	1.17471	3.00146e-15		YJL089W	514.239	2.3109	3.01235e-62			YER076C		YBR107C
	YCR095W-A	390.541	3.68507	4.87451e-67		YDL019C	455.681	0.254586	0.153186			YCR079W		YLR303W			YJL088W	1011.03	1.73773	1.26273e-75		YJL088W	1011.03	0.870299	2.30861e-20			YPL189C-A		YCR010C
	YCR096C	12.1237	-7.29703	8.21415e-06		YDL020C	1003.42	-0.936642	4.9457e-12			YOR290C		YNL030W			YJL087C	2247.47	-0.574332	3.89565e-15		YJL087C	2247.47	0.367642	9.35985e-08			YCR018C		YBR063C
	YCR097W	456.93	-12.5313	5.13828e-17		YDL022W	845.797	-0.653193	4.52261e-06			YDR320W-B		YGL189C			YJL086C	145.273	-0.500982	0.0431071		YJL086C	145.273	0.223238	0.338921			YIL055C		YMR095C
	YCR098C	597.359	0.0227473	0.895962		YDL025C	176.116	-2.10391	1.48636e-18			YGL223C		YEL020C-B			YJL085W	1762.53	0.154784	0.0504052		YJL085W	1762.53	0.465963	9.19152e-11			YER053C-A		YGR067C
	YCR101C	710.5	2.33414	5.72855e-54		YDL026W	11.9951	-6.78621	5.95039e-05			YHR006W		YKR024C			YJL084C	4342.69	0.217392	0.000720747		YJL084C	4342.69	0.519054	1.32454e-17			YDL196W		YDR069C
	YCR102C	39.4839	0.335093	0.465323		YDL027C	289.96	-0.649724	0.000783916			YCL042W		YMR229C			YJL083W	1610.6	-0.10854	0.204892		YJL083W	1610.6	0.678236	7.05692e-20			YKL071W		YDL238C
	YCR102W-A	25.9719	7.88889	5.09727e-07		YDL028C	99.2851	-0.318108	0.326407			YFL041W-A		YML006C			YJL082W	4429.47	0.28843	1.12711e-06		YJL082W	4429.47	0.458042	5.96557e-16			YCR019W		YDR160W
	YCR106W	849.497	2.03546	3.1926e-41		YDL029W	1096.54	0.170245	0.282787			YLR178C		YDR510W			YJL081C	2580.9	-0.0910991	0.220641		YJL081C	2580.9	-0.00178202	0.982168			YPR203W		YOL117W
	YCR107W	14.4617	7.04402	1.26023e-05		YDL030W	173.273	0.233663	0.364425			YOR064C		YLR061W			YJL080C	12636.3	-1.24794	1.43995e-171		YJL080C	12636.3	-1.27786	1.45964e-187			YHL035C		YBL029W
	YDL001W	213.939	0.324318	0.146522		YDL031W	150.42	0.460392	0.0939489			YDL231C		YKL043W			YJL079C	4712.02	0.753801	1.24692e-40		YJL079C	4712.02	-0.606329	9.19059e-27			YJL185C		YOR377W
	YDL002C	692.319	0.285334	0.094275		YDL033C	332.192	0.223174	0.276711			YOL017W		YPL050C			YJL078C	15031	-0.534259	0.000497942		YJL078C	15031	-0.619825	3.92756e-05			YDL154W		YBR128C
	YDL003W	374.815	0.451884	0.0102091		YDL035C	96.5072	1.38584	1.715e-06			YCR037C		YDR023W			YJL077W-B	135.408	1.678	8.01499e-12		YJL077W-B	135.408	0.921337	0.000163406			YKR061W		YOR328W
	YDL004W	11932.3	-0.264613	0.024742		YDL036C	347.547	0.296692	0.144362			YHR048W		YOL147C			YJL077C	43.5544	2.04054	7.45862e-06		YJL077C	43.5544	1.03611	0.0240528			YGL222C		YJL162C
	YDL005C	472.33	0.450314	0.00640104		YDL037C	383.777	3.13388	1.3674e-60			YIL155C		YHR010W			YJL077W-A	234.268	0.609904	0.00131848		YJL077W-A	234.268	0.0435362	0.831733			YLL057C		YPL174C
	YDL006W	479.968	-0.4	0.0124369		YDL040C	1819.43	0.00895786	0.955031			YPL039W		YKL060C			YJL076W	6995.86	-0.55416	2.99953e-18		YJL076W	6995.86	-0.28954	4.15834e-06			YNL036W		YLR317W
	YDL007W	1607.73	-0.428814	0.00151491		YDL042C	194.85	-0.0102914	0.971909			YJL057C		YPR187W			YJL074C	3155.87	-0.312472	5.88753e-06		YJL074C	3155.87	-0.00229823	0.976481			YLR341W		YLL010C
	YDL008W	1695.4	0.252552	0.0816775		YDL043C	569.105	-0.207134	0.233182			YPL072W		YOR195W			YJL073W	2701.03	-0.438793	1.02479e-10		YJL073W	2701.03	-0.0387206	0.58435			YBL075C		YNL332W
	YDL009C	223.033	1.33644	2.39202e-10		YDL044C	121.39	-0.792043	0.00336841			YEL063C		YNR035C			YJL072C	1136.56	0.333974	0.000227506		YJL072C	1136.56	0.624302	1.47281e-13			YDL079C		YPL278C
	YDL010W	799.028	0.203137	0.175981		YDL045C	452.211	0.344285	0.058512			YLR151C		YBR096W			YJL071W	1612.41	0.40933	6.11132e-07		YJL071W	1612.41	0.960147	1.60497e-35			YER175C		YNL116W
	YDL012C	1267.85	0.16573	0.2338		YDL045W-A	2751.7	0.255044	0.0656916			YOR180C		YER057C			YJL070C	1385.81	0.361432	4.56264e-05		YJL070C	1385.81	1.10185	1.31574e-41			YJR020W		YKL075C
	YDL013W	338.99	0.277928	0.137765		YDL046W	10530.5	0.709247	3.61982e-10			YDR342C		YJL062W			YJL069C	2988.18	-0.463935	4.08639e-10		YJL069C	2988.18	-0.0170076	0.833102			YLR376C		YML068W
	YDL014W	3068.68	-0.261218	0.0366416		YDL047W	928.467	0.0217946	0.907489			YIL059C		YLR001C			YJL068C	2693.37	0.0533635	0.479138		YJL068C	2693.37	-0.795127	1.07942e-32			YNL128W		YKL055C
	YDL015C	3952.01	-0.6026	4.32989e-07		YDL048C	1815.66	0.932564	3.46784e-13			YPL055C		YLR299W			YJL067W	14.9327	-1.35361	0.0922149		YJL067W	14.9327	-2.72193	0.000466409			YLR233C		YFR008W
	YDL017W	231.07	0.314393	0.124159		YDL049C	31.5233	0.177716	0.755093			YJR020W		YER037W			YJL066C	1664.3	0.502009	1.84261e-10		YJL066C	1664.3	0.398936	1.45601e-07			YMR105W-A		YFL049W
	YDL018C	1006.59	0.313421	0.0335406		YDL051W	2782.6	0.147675	0.289544			YJL110C		YJR001W			YJL065C	1928.79	0.948452	8.46347e-31		YJL065C	1928.79	0.839699	1.58024e-25			YKR069W		YIL061C
	YDL019C	405.69	-0.679786	7.35625e-05		YDL052C	3953.49	0.165806	0.208882			YGR168C		YDL185W			YJL064W	10.064	-1.17282	0.265024		YJL064W	10.064	-1.91406	0.048066			YGL251C		YOL063C
	YDL020C	1308.56	1.47073	5.78693e-28		YDL053C	742.025	-0.232292	0.234003			YNL277W		YOL097C			YJL063C	2150.22	-0.161421	0.0244272		YJL063C	2150.22	0.0509606	0.473818			YDR403W		YDL033C
	YDL021W	45.6837	8.70349	1.5562e-08		YDL054C	359.211	0.442167	0.0578699			YKL090W		YMR210W			YJL062W-A	1830.27	-0.101482	0.204663		YJL062W-A	1830.27	-1.04697	5.1144e-47			YCL005W		YDR125C
	YDL022W	1314.39	1.5696	3.36135e-33		YDL055C	17757.1	0.0157785	0.913426			YMR030W		YML086C			YJL062W	4237.22	-0.277998	3.72214e-05		YJL062W	4237.22	-0.177779	0.0072638			YIL077C		YBL088C
	YDL024C	12.9808	6.88843	2.49732e-05		YDL056W	153.851	0.180332	0.512528			YHR137W		YHR141C			YJL061W	3543.21	-0.0918126	0.190484		YJL061W	3543.21	0.325802	2.6591e-07			YDL222C		YPL257W
	YDL025C	189.665	2.22163	3.79076e-22		YDL057W	61.3262	0.336997	0.413181			YOL112W		YDL014W			YJL060W	3511.82	-0.0578344	0.366237		YJL060W	3511.82	-0.390879	5.531e-12			YCR068W		YLR273C
	YDL025W-A	9.85386	6.49045	9.43921e-05		YDL058W	443.349	-0.1046	0.594703			YDL049C		YDR477W			YJL059W	1240.27	0.462595	4.46682e-07		YJL059W	1240.27	0.0303701	0.759704			YBR223C		YPL072W
	YDL026W	29.7785	8.0859	2.15495e-07		YDL059C	113.276	0.388654	0.188887			YDR228C		YDL157C			YJL058C	1220.52	0.190009	0.0435008		YJL058C	1220.52	0.747355	1.72565e-18			YEL008C-A		YDL170W
	YDL027C	263.777	0.399066	0.0406078		YDL060W	558.11	0.640924	4.87489e-05			YHR189W		YPL218W			YJL057C	1829.23	0.678936	1.83116e-19		YJL057C	1829.23	0.988291	2.18778e-43			YDR530C		YKL089W
	YDL028C	117.191	0.703523	0.0080469		YDL061C	47202.2	1.07468	1.06543e-21			YJL127C-B		YBR009C			YJL056C	2227.54	-0.292059	6.98305e-05		YJL056C	2227.54	0.360496	1.60449e-07			YPR085C		YML027W
	YDL029W	1286.61	0.262493	0.0585315		YDL063C	742.365	0.190841	0.240906			YCR020C-A		YOR006C			YJL055W	2716.9	-0.126749	0.0688649		YJL055W	2716.9	-0.389513	1.14753e-09			YJL142C		YJL071W
	YDL030W	164.74	-0.42373	0.0697144		YDL064W	1410.88	0.446387	0.00769643			YLR346C		YDL070W			YJL054W	3101.22	-0.304286	1.03122e-05		YJL054W	3101.22	-0.0907879	0.190003			YLR132C		YEL057C
	YDL031W	147.576	-0.555054	0.0341125		YDL065C	327.981	0.0707104	0.756204			YCL032W		YOR296W			YJL053W	1779.91	0.314211	0.000270996		YJL053W	1779.91	0.324512	8.82833e-05			YAL064W-B		YER077C
	YDL033C	303.185	-0.552257	0.00282874		YDL066W	6955.2	0.105482	0.42733			YPL236C		YPL048W			YJL052C-A	2.74221	0.324145	0.869125		YJL052C-A	2.74221	-2.44333	0.21767			YFR012W		YDR421W
	YDL035C	111.401	-0.773212	0.00365706		YDL067C	3977.54	0.749309	7.55026e-08			YDL105W		YIL018W			YJL052W	5895.32	-0.318809	1.0144e-07		YJL052W	5895.32	-2.92325	0			YCL061C		YDR151C
	YDL036C	310.523	-0.716928	0.000192217		YDL069C	524.097	-0.445699	0.00649343			YHR119W		YGR200C			YJL051W	3349.43	-0.421215	8.1058e-07		YJL051W	3349.43	0.804314	3.66447e-23			YNR059W		YMR052C-A
	YDL037C	358.097	-4.9923	1.02713e-83		YDL070W	1302.05	0.592362	3.60486e-05			YJL181W		YPL232W			YJL050W	5613.44	-0.592223	3.57679e-26		YJL050W	5613.44	-0.676959	2.23054e-35			YMR056C		YNL018C
	YDL040C	1547.89	-0.549394	1.55809e-05		YDL072C	4259.77	0.0827501	0.6977			YPL018W		YFR051C			YJL049W	1359.41	0.918407	8.87344e-20		YJL049W	1359.41	1.16221	9.73454e-33			YAL063C-A		YDR004W
	YDL042C	164.546	-0.550428	0.0169505		YDL073W	439.928	-0.28486	0.145004			YDL133W		YNL283C			YJL048C	3033.61	-0.052735	0.441348		YJL048C	3033.61	-0.342431	1.54322e-08			YHR176W		YMR066W
	YDL043C	620.767	0.413537	0.00637297		YDL074C	1277.03	-0.369944	0.00857681			YNR014W		YHR001W-A			YJL047C-A	368.27	-0.957478	1.60412e-10		YJL047C-A	368.27	-1.54066	2.30212e-27			YMR153C-A		YER046W
	YDL044C	144.592	1.15584	1.3664e-06		YDL075W	49780.5	1.06826	6.32391e-19			YOR020W-A		YML131W			YJL047C	2227.35	-0.253404	0.00105671		YJL047C	2227.35	0.475831	2.69024e-11			YNL338W		YJR083C
	YDL045C	444.451	-0.426497	0.0103486		YDL076C	488.544	-0.407572	0.0183881			YDR258C		YKL210W			YJL046W	1614.67	0.128091	0.149552		YJL046W	1614.67	0.290964	0.000347013			YCR102C		YLR385C
	YDL045W-A	3157.23	0.127972	0.344719		YDL077C	230.474	-0.44174	0.0379466			YPR168W		YMR230W			YJL045W	199.67	-0.093845	0.699682		YJL045W	199.67	-0.410956	0.051002			YGR256W		YEL062W
	YDL046W	12443.6	-0.167943	0.160943		YDL078C	1719.93	0.123912	0.395924			YCR081W		YOL002C			YJL044C	1971.07	0.47158	1.65458e-11		YJL044C	1971.07	0.329586	1.39915e-06			YOR190W		YLR164W
	YDL047W	1131.6	0.485977	0.000505613		YDL079C	37.4495	-8.42721	1.13982e-07			YBR208C		YNR019W			YJL043W	58.5904	0.325134	0.428196		YJL043W	58.5904	1.23445	0.000505788			YJL141C		YLR245C
	YDL048C	1565.06	-1.72001	2.23002e-27		YDL080C	253.743	-0.190427	0.392055			YLR164W		YGR014W			YJL042W	7209.19	-0.692515	2.47452e-30		YJL042W	7209.19	-0.803695	5.86362e-42			YGL156W		YNR045W
	YDL049C	61.0872	1.3909	7.15918e-05		YDL081C	74981.5	1.05253	7.89915e-11			YDR078C		YNL061W			YJL041W	5232.61	-0.219372	0.000215122		YJL041W	5232.61	-0.38106	1.83748e-11			YOR388C		YDR405W
	YDL051W	2324.37	-0.792743	1.26827e-10		YDL082W	24377.7	-0.100441	0.472446			YDR286C		YPL154C			YJL039C	9116.12	-0.438839	3.3171e-19		YJL039C	9116.12	-0.00330473	0.953111			YPR026W		YGL254W
	YDL052C	3918.74	-0.216828	0.0776677		YDL083C	101345	0.419851	0.00167049			YDL009C		YDR346C			YJL038C	130.506	0.0170923	0.962428		YJL038C	130.506	-0.676559	0.0210003			YER092W		YGR161W-C
	YDL053C	730.969	0.171344	0.446197		YDL084W	4050.84	0.460987	0.000104013			YAL060W					YJL037W	77.0096	1.0312	0.00508411		YJL037W	77.0096	-0.0678721	0.865856			YPL214C		YDR220C
	YDL054C	440.332	0.150795	0.52365		YDL085C-A	831.786	0.955481	6.42754e-11			YJL023C					YJL036W	2062.33	0.162897	0.0307825		YJL036W	2062.33	0.454953	3.68612e-11			YER103W		YJR119C
	YDL055C	13913.7	-0.871212	2.74957e-15		YDL086C-A	88.2626	1.55607	1.30957e-06			YMR117C					YJL035C	655.256	-0.329362	0.00695488		YJL035C	655.256	-0.47274	3.50079e-05			YOL043C		YDR058C
	YDL056W	187.499	0.353594	0.11975		YDL086W	2234.81	0.020631	0.898339			YOR070C					YJL034W	19616.3	-0.769175	9.81613e-69		YJL034W	19616.3	-0.827648	1.32484e-81			YPR201W		YDR409W
	YDL057W	66.8648	-0.093948	0.810511		YDL087C	270.745	-0.598709	0.00300733			YLR152C					YJL033W	4060.03	-0.60299	1.2074e-18		YJL033W	4060.03	-0.340153	3.65777e-07			YNR057C		YDL028C
	YDL058W	347.635	-0.701343	6.15549e-05		YDL088C	130.352	0.427807	0.148171			YDR131C					YJL032W	3.18863	-2.61899	0.23255		YJL032W	3.18863	-2.23511	0.196973			YOR328W		YMR023C
	YDL059C	126.857	-0.0600618	0.839742		YDL089W	319.024	0.629587	0.000585459			YHL040C					YJL031C	1169.99	-0.405345	8.06981e-06		YJL031C	1169.99	-0.0180408	0.849228			YDR459C		YPR155C
	YDL060W	554.748	-0.691605	4.36618e-06		YDL090C	335.641	0.107239	0.617848			YBR194W					YJL030W	857.082	-0.428812	0.00011821		YJL030W	857.082	-0.00250568	0.983617			YMR018W		YHR033W
	YDL061C	47288.6	-1.1011	1.93723e-23		YDL091C	336.047	-0.0810615	0.720747			YLR237W					YJL029C	3715.67	-0.3335	4.66684e-08		YJL029C	3715.67	0.292826	4.79971e-07			YOL158C		YOR205C
	YDL063C	655.123	-0.636829	1.39376e-05		YDL092W	1808.07	0.18846	0.195057			YBR065C					YJL028W	17.6435	-0.741908	0.333606		YJL028W	17.6435	-1.82494	0.010326			YER101C		YAL032C
	YDL064W	1274.57	-0.850084	2.97008e-06		YDL093W	153.996	1.45871	7.0175e-10			YER137C					YJL027C	21.7913	1.45495	0.0337881		YJL027C	21.7913	1.12185	0.0922221			YGR142W		YMR096W
	YDL065C	358.289	0.157741	0.403231		YDL095W	656.771	0.713089	9.18656e-06			YMR055C					YJL025W	1669.55	0.451101	1.94615e-08		YJL025W	1669.55	0.918278	1.75256e-33			YHL043W		YEL030W
	YDL066W	4885.53	-1.53504	2.18683e-40		YDL097C	1431.74	0.318878	0.0184994			YNL187W					YJL024C	1716.77	0.293045	0.000104492		YJL024C	1716.77	-0.11447	0.129723			YOR349W		YDR078C
	YDL067C	4335.87	-0.462357	0.00451165		YDL098C	470.523	-0.0162548	0.940577			YLR123C					YJL023C	590.285	0.782719	1.01243e-09		YJL023C	590.285	1.17064	7.95486e-22			YPL088W		YBR033W
	YDL069C	433.116	-0.0934686	0.604436		YDL099W	635.234	-0.346789	0.0388061			YCR030C					YJL022W	57.7304	2.88378	2.93278e-10		YJL022W	57.7304	1.90696	2.99477e-05			YER184C		YJR098C
	YDL070W	1072.97	-1.47368	2.10805e-29		YDL100C	5141.23	-0.244616	0.0553009			YIL077C					YJL020C	10358	-0.502918	4.7513e-17		YJL020C	10358	-0.794746	9.53499e-42			YIL120W		YJL206C
	YDL072C	5749.19	0.683064	9.22614e-05		YDL101C	301.36	-0.0582961	0.79713			YBL103C					YJL020W-A	4.06317	0.0361361	0.982143		YJL020W-A	4.06317	-1.49405	0.358523			YEL077W-A		YMR094W
	YDL073W	402.979	0.0246138	0.899855		YDL102W	305.085	-0.218552	0.313937			YLR142W					YJL019W	2003.35	-0.216661	0.00231676		YJL019W	2003.35	0.194547	0.00377566			YER150W		YGR113W
	YDL074C	1103.72	-0.0499121	0.745069		YDL103C	826.219	-0.0731403	0.672701			YER150W					YJL016W	3178.16	-0.0223944	0.754468		YJL016W	3178.16	-0.0206859	0.758987			YCL008C		YGL134W
	YDL075W	44995.7	-1.62129	1.41437e-26		YDL104C	76.2286	0.0341352	0.931482			YOR227W					YJL015C	13.7727	-1.38461	0.0761642		YJL015C	13.7727	-2.62408	0.000460013			YBR047W		YBL010C
	YDL076C	391.304	-0.235794	0.189688		YDL105W	44.4986	-0.141614	0.774493			YJR130C					YJL014W	6977.37	-0.596843	4.61095e-32		YJL014W	6977.37	-0.713377	1.46808e-47			YKL098W		YDL087C
	YDL077C	223.425	0.343519	0.0997584		YDL106C	197.036	-0.861991	6.34919e-05			YNL159C					YJL013C	1375.62	0.631895	5.05051e-12		YJL013C	1375.62	0.82466	6.79374e-21			YPL264C		YAL031C
	YDL078C	1562.45	-0.456346	0.000410722		YDL107W	125.969	0.00727079	0.983935			YCL038C					YJL012C	9701.57	-1.97678	0		YJL012C	9701.57	-1.46469	4.58112e-248			YKL070W		YGR168C
	YDL079C	84.4838	9.59039	2.71548e-10		YDL108W	625.249	-0.185244	0.275165			YER160C					YJL011C	768.944	0.0143492	0.913748		YJL011C	768.944	0.0826486	0.471844			YCL055W		YNL204C
	YDL080C	255.046	0.183687	0.370059		YDL109C	47.8226	-0.841094	0.0451997			YKL162C-A					YJL010C	3248.96	-0.72038	4.42591e-30		YJL010C	3248.96	-0.481656	2.56623e-15			YGR168C		YOL104C
	YDL081C	66080.6	-1.75195	3.67323e-23		YDL110C	408.411	-0.180697	0.343563			YDR059C					YJL009W	6.38234	-1.57198	0.162202		YJL009W	6.38234	-1.94213	0.0601839			YKL031W		YNL092W
	YDL082W	19074.9	-0.714954	2.57956e-10		YDL111C	2753.73	-0.450645	0.000208886			YDL176W					YJL008C	6280.37	-0.566049	1.63067e-28		YJL008C	6280.37	-0.585691	2.80124e-32			YOR208W		YFL057C
	YDL083C	85324.6	-1.11882	2.333e-16		YDL112W	309.149	0.48003	0.0133647			YDL130W-A					YJL007C	3.71011	0.598979	0.699932		YJL007C	3.71011	-0.701081	0.642258			YJL132W		YPR174C
	YDL084W	3558.63	-0.985072	5.55337e-18		YDL113C	375.989	-0.924095	2.23089e-07			YOR010C					YJL006C	956.02	-0.0502808	0.66015		YJL006C	956.02	0.68066	5.84683e-13			YIR018W		YHR036W
	YDL085C-A	832.106	-0.987252	2.56369e-10		YDL114W-A	35.7628	0.578898	0.250107			YIR007W					YJL005W	7114.55	-0.0109315	0.849207		YJL005W	7114.55	-0.108513	0.0282673			YMR204C		YLR176C
	YDL086C-A	123.646	-0.208306	0.487144		YDL115C	514.515	-0.597277	0.00021913			YOR066W					YJL004C	1902.86	0.541149	8.77631e-13		YJL004C	1902.86	0.269963	0.000295958			YOR003W		YHL046C
	YDL086W	2619.86	0.390123	0.00157547		YDL116W	517.627	-0.0953121	0.634957			YDR479C					YJL003W	563.072	0.419785	0.00102244		YJL003W	563.072	0.0567601	0.670779			YLR393W		YGR205W
	YDL087C	318.634	0.954472	1.02245e-07		YDL117W	520.823	-0.231098	0.182425			YGL007C-A					YJL002C	9174.54	-0.542907	1.91333e-27		YJL002C	9174.54	-0.933118	6.83207e-81			YLR164W		YDL231C
	YDL088C	248.372	1.20423	6.83786e-08		YDL119C	181.536	-0.079372	0.77387			YMR167W					YJL001W	4063.67	-0.447761	3.49702e-16		YJL001W	4063.67	-0.519768	5.38569e-23			YLR456W		YLR374C
	YDL089W	296.462	-0.948106	1.96726e-07		YDL120W	748.753	0.119867	0.541437			YJL079C					YJR001W	5431.52	-0.135614	0.417308		YJR001W	5431.52	-0.767103	4.39916e-07			YNL331C		YOL001W
	YDL090C	383.988	0.249633	0.154417		YDL121C	4222.85	0.103734	0.446518			YLR097C					YJR002W	3635.32	-0.460276	8.23123e-12		YJR002W	3635.32	-0.513115	3.82518e-15			YOL015W		YJR056C
	YDL091C	331.876	0.023524	0.913287		YDL122W	962.692	0.33199	0.0288668			YJR112W-A					YJR003C	2268.04	-0.228599	0.00164041		YJR003C	2268.04	0.381439	1.62474e-08			YDR125C		YPR084W
	YDL092W	2006.77	0.0947865	0.479815		YDL123W	1674.13	-0.446594	0.00076714			YJL159W					YJR004C	5203.21	2.77361	0		YJR004C	5203.21	1.1941	1.48453e-73			YLR363C		YMR126C
	YDL093W	155.044	-1.46122	2.80144e-10		YDL124W	4066.75	0.0249712	0.869335			YOR208W					YJR005W	3001.15	0.248275	0.000283264		YJR005W	3001.15	0.687062	9.73278e-27			YNL063W		YHR176W
	YDL094C	30.8277	8.13585	1.75045e-07		YDL125C	11929.3	-0.250598	0.0705374			YDR437W					YJR005C-A	32.298	2.12255	0.00472311		YJR005C-A	32.298	1.96388	0.00646013			YDR320W-B		YNL314W
	YDL095W	601.281	-1.11138	2.55232e-13		YDL126C	2016.03	0.542489	1.17101e-05			YPR202W					YJR006W	2566.86	0.465184	1.63344e-13		YJR006W	2566.86	0.298368	1.24585e-06			YEL065W		YJL077W-B
	YDL097C	1419.41	-0.372157	0.00396799		YDL127W	209.415	0.266515	0.255394			YFR008W					YJR007W	6352.45	-0.432786	4.15172e-13		YJR007W	6352.45	-0.717054	6.74125e-35			YIR017C		YLR376C
	YDL098C	394.793	-0.56813	0.00111846		YDL128W	2416.07	0.747774	9.3847e-10			YBR132C					YJR008W	1458.16	1.67238	2.71542e-78		YJR008W	1458.16	1.20061	1.23273e-42			YBL060W		YMR111C
	YDL099W	638.015	0.338075	0.0518832		YDL129W	177.341	0.0551068	0.843242			YCR073W-A					YJR009C	25797.4	-0.595779	1.13696e-38		YJR009C	25797.4	-1.8144	0			YIL136W		YBR131W
	YDL100C	4437.34	-0.198869	0.118568		YDL130W	43209	1.14007	1.09779e-19			YDR309C					YJR010W	2326.55	0.076648	0.287318		YJR010W	2326.55	-0.0433235	0.538787			YDR421W		YBR225W
	YDL101C	275.611	-0.23021	0.247259		YDL130W-A	1140.17	-0.410815	0.00355309			YMR056C					YJR010C-A	859.381	-0.32921	0.00249902		YJR010C-A	859.381	0.0114848	0.92039			YLR394W		YOL140W
	YDL102W	300.795	0.158499	0.418303		YDL131W	988.861	0.120399	0.449899			YCL018W					YJR011C	407.238	0.0122382	0.945994		YJR011C	407.238	0.646777	4.92661e-06			YHL026C		YJL025W
	YDL103C	807.491	-0.0141513	0.930733		YDL132W	372.783	-0.0880369	0.685783			YGL134W					YJR012C	538.226	0.117762	0.402052		YJR012C	538.226	0.199716	0.117863			YNL160W		YGL229C
	YDL104C	81.7976	0.142025	0.667512		YDL133C-A	16720.1	1.07353	1.05477e-18			YEL008C-A					YJR013W	2682.46	0.0145614	0.850085		YJR013W	2682.46	0.0308832	0.661399			YER173W		YKL208W
	YDL105W	76.795	1.37337	2.11505e-05		YDL133W	293.74	-1.11913	1.71888e-09			YMR294W					YJR014W	2811.52	-0.275583	4.62466e-05		YJR014W	2811.52	-0.755373	9.14477e-32			YDL199C		YDR438W
	YDL106C	224.132	1.1245	2.16912e-08		YDL134C	2573.68	-0.159513	0.244761			YGR068C					YJR015W	9042.02	-0.39477	9.13013e-16		YJR015W	9042.02	-0.660485	2.73831e-43			YER046W		YNL109W
	YDL107W	130.482	0.0689848	0.801647		YDL135C	2025.14	0.21818	0.111944			YCR051W					YJR016C	19598.2	-0.148908	0.00105368		YJR016C	19598.2	-0.697934	7.63584e-58			YJL037W		YDR541C
	YDL108W	656.775	0.295975	0.0496408		YDL136W	41289.1	0.213877	0.083383			YPL134C					YJR017C	2082.2	-0.383416	3.19451e-06		YJR017C	2082.2	-0.763476	3.86644e-22			YGR269W		YNL334C
	YDL109C	133.511	2.74314	1.12335e-21		YDL137W	8592.04	0.327952	0.00572438			YCR024C					YJR018W	38.5217	-0.684637	0.140199		YJR018W	38.5217	-1.63789	0.000154899			YGR296W		YOL159C-A
	YDL110C	590.055	1.04212	5.20302e-12		YDL138W	149.901	-0.648455	0.0133262			YAL034C					YJR019C	1664.41	0.269059	0.00237844		YJR019C	1664.41	0.12509	0.153758			YNL025C		YMR052W
	YDL111C	2858.87	0.52446	1.46461e-05		YDL139C	85.5307	-0.203415	0.564453			YER173W					YJR020W	79.9973	1.14182	0.00015696		YJR020W	79.9973	-0.787382	0.0112773			YKR077W		YER180C
	YDL112W	284.495	-0.815043	1.00184e-05		YDL140C	1982.19	-0.0507245	0.777479			YNL163C					YJR021C	1145.17	1.18617	2.07042e-36		YJR021C	1145.17	1.61892	1.30667e-71			YMR151W		YPL149W
	YDL113C	394.354	1.0114	1.96848e-08		YDL141W	606.18	-0.186522	0.338177			YML100W					YJR022W	632.898	0.537524	2.44251e-05		YJR022W	632.898	0.989763	6.09574e-17			YIR016W		YML091C
	YDL114W-A	37.5734	-0.434039	0.334604		YDL142C	402.266	-0.393152	0.0293288			YDL199C					YJR023C	97.6548	-0.0678671	0.833511		YJR023C	97.6548	-0.667524	0.0155876			YNL011C		YHL035C
	YDL115C	581.074	0.860519	2.8383e-08		YDL143W	2559.86	-0.108522	0.442557			YBR156C					YJR024C	3180.88	-0.184422	0.00622076		YJR024C	3180.88	-0.655425	6.17794e-25			YCL051W		YIR007W
	YDL116W	457.935	-0.293262	0.0893956		YDL144C	931.26	0.389137	0.00630411			YLR355C					YJR025C	1866.15	-0.70111	7.8873e-21		YJR025C	1866.15	-1.72418	1.47234e-121			YOR223W		YMR153C-A
	YDL117W	467.785	-0.093003	0.597753		YDL145C	2001.69	0.470787	0.000619822			YMR001C-A					YJR027W	9074.01	-1.35631	1.9279e-16		YJR027W	9074.01	-2.17408	1.59317e-40			YLR266C		YNL223W
	YDL119C	247.131	0.828911	4.65501e-05		YDL146W	139.027	1.29719	1.73621e-07			YBL071W-A					YJR026W	1542.52	-1.83359	7.46439e-08		YJR026W	1542.52	-2.86602	1.33731e-17			YJR036C		YMR114C
	YDL120W	753.064	-0.12528	0.52998		YDL147W	3578.38	-0.196733	0.134846			YBL078C					YJR029W	10380.4	-1.0057	4.20465e-83		YJR029W	10380.4	-1.98249	0			YPL278C		YER101C
	YDL121C	4654.91	0.153222	0.213487		YDL148C	654.566	0.229073	0.177901			YGL117W					YJR028W	4026.23	-1.16569	3.67692e-77		YJR028W	4026.23	-2.27411	1.56617e-292			YGR015C		YGL116W
	YDL122W	895.204	-0.608058	2.0284e-05		YDL149W	64.3018	-0.390973	0.313666			YMR315W-A					YJR030C	1894.07	0.188287	0.0197538		YJR030C	1894.07	0.690901	7.82733e-21			YDR258C		YPR201W
	YDL123W	1523.88	0.181871	0.18303		YDL150W	524.342	0.499933	0.00216222			YPL092W					YJR031C	3562.37	-0.33781	1.08587e-07		YJR031C	3562.37	0.214426	0.00048911			YHR137W		YPL175W
	YDL124W	5402.55	0.690715	1.38951e-09		YDL153C	1098.2	0.48756	0.000319941			YER111C					YJR032W	2117.81	-0.340613	2.53097e-06		YJR032W	2117.81	-0.145819	0.0385677			YGR016W		YDR318W
	YDL125C	12638.7	0.381641	0.00347121		YDL155W	393.285	-0.44588	0.0133442			YKL048C					YJR033C	3419.73	0.275756	2.57217e-05		YJR033C	3419.73	0.597336	5.89307e-22			YPR158W		YFR005C
	YDL126C	1750.38	-1.14173	8.50099e-17		YDL156W	16.018	-7.20302	1.34249e-05			YGR018C					YJR034W	589.094	0.25488	0.0537692		YJR034W	589.094	-0.343571	0.006051			YDR525W-A		YJR110W
	YDL127W	209.739	-0.286925	0.181131		YDL157C	3159.96	0.59599	0.000101858			YGR278W					YJR035W	1868.68	0.481746	3.47517e-08		YJR035W	1868.68	0.719671	7.86374e-18			YIL132C		YGL081W
	YDL128W	2401.11	-0.801761	2.10388e-11		YDL159W	197.858	-0.037742	0.888991			YNL314W					YJR036C	730.28	1.02353	2.68153e-13		YJR036C	730.28	1.63698	4.69224e-34			YLL055W		YPR160W-A
	YDL129W	123.82	-1.47606	4.42332e-09		YDL160C	1303.01	0.0505788	0.787428			YKL071W					YJR037W	2.69779	-0.247392	0.918223		YJR037W	2.69779	0.350726	0.864582			YMR052W		YKL017C
	YDL130W	41277.8	-1.40271	3.15362e-33		YDL160C-A	591.599	0.77801	3.2858e-07			YDR082W					YJR038C	19.2882	0.4076	0.579576		YJR038C	19.2882	1.22373	0.0545484			YEL074W		YOR349W
	YDL130W-A	1703.32	1.2944	1.05103e-23		YDL161W	1368.84	-0.0733241	0.655241			YNL274C					YJR039W	1922.1	0.840314	7.45707e-24		YJR039W	1922.1	1.51745	3.25597e-80			YOL159C		YCL004W
	YDL131W	965.474	-0.217043	0.1235		YDL164C	300.741	-0.239702	0.247459			YCR027C					YJR040W	2552.06	-0.488593	6.12474e-13		YJR040W	2552.06	-0.299717	4.7527e-06			YPL134C		YJR097W
	YDL132W	350.315	-0.114541	0.555499		YDL165W	558.246	0.0322227	0.875773			YCL034W					YJR041C	4862.24	-0.448021	7.29289e-18		YJR041C	4862.24	-0.0124584	0.825904			YDR058C		YLR408C
	YDL133C-A	17806.8	-0.83798	3.44872e-09		YDL166C	364.791	0.219779	0.267506			YNL092W					YJR042W	3984.75	-0.271135	0.00101699		YJR042W	3984.75	-0.113724	0.170704			YDL223C		YLR098C
	YDL133W	333.922	1.36664	2.51633e-14		YDL167C	1111.36	0.207876	0.164974			YPL141C					YJR043C	1495.79	-0.0881477	0.329579		YJR043C	1495.79	-0.0159566	0.859868			YBR132C		YMR019W
	YDL134C	2162.61	-0.386037	0.00190344		YDL168W	749.133	-0.0719615	0.687286			YJL141C					YJR044C	3148.79	-0.210517	0.000793147		YJR044C	3148.79	-0.943404	1.76471e-56			YPL257W		YLR320W
	YDL135C	1860	-0.524586	2.38734e-05		YDL169C	59.6357	-0.501761	0.197348			YLR247C					YJR045C	19267.7	-0.613027	1.01717e-40		YJR045C	19267.7	-1.04146	2.41672e-117			YIR014W		YPR093C
	YDL136W	35040	-0.81545	7.52631e-13		YDL170W	279.24	-0.883579	7.08809e-06			YBR107C					YJR046W	2793.29	0.169714	0.0114174		YJR046W	2793.29	0.130003	0.0457049			YCL035C		YMR224C
	YDL137W	9172.38	-0.14629	0.222244		YDL171C	1281.76	0.670225	3.41615e-06			YMR250W					YJR047C	175.39	-0.692743	0.00334526		YJR047C	175.39	-2.54775	1.18411e-25			YPR078C		YPL216W
	YDL138W	189.207	1.14649	4.26458e-07		YDL173W	329.573	0.45441	0.0167442			YKR004C					YJR048W	3511.67	-0.765752	5.09076e-41		YJR048W	3511.67	-0.647663	1.06047e-32			YCL034W		YKR091W
	YDL139C	104.836	0.693034	0.0139824		YDL174C	1272.62	0.0415601	0.799462			YDR451C					YJR049C	1625.51	0.236334	0.00204853		YJR049C	1625.51	-0.090984	0.235817			YIL097W		YPR057W
	YDL140C	1627.25	-0.602618	2.06386e-06		YDL175C	197.385	-0.388841	0.096326			YMR174C					YJR050W	1050.44	-0.00316305	0.977332		YJR050W	1050.44	0.44119	3.48759e-06			YML003W		YJL090C
	YDL141W	658.699	0.384544	0.0203009		YDL176W	194.915	-0.774156	0.000468247			YOR264W					YJR051W	1922.86	-0.438687	1.82911e-08		YJR051W	1922.86	-0.612364	2.04404e-16			YDL110C		YOR249C
	YDL142C	368.481	0.140978	0.459071		YDL177C	250.165	-0.476678	0.0306988			YNL054W					YJR052W	1464.01	0.101007	0.282163		YJR052W	1464.01	0.577459	1.82155e-12			YJR130C		YNL012W
	YDL143W	2277.56	-0.260349	0.0365082		YDL178W	614.169	0.0702774	0.75867			YBL100W-A					YJR053W	976.715	-0.286491	0.00431936		YJR053W	976.715	0.990847	8.78695e-29			YLR211C		YHR194W
	YDL144C	927.175	-0.429507	0.00200266		YDL179W	347.197	0.00622183	0.978913			YDL088C					YJR054W	2027.85	-0.662568	6.66182e-20		YJR054W	2027.85	0.352688	1.71385e-07			YOR303W		YGR131W
	YDL145C	1787.19	-0.928489	5.30079e-14		YDL180W	118.288	-0.289977	0.331469			YDR125C					YJR055W	358.787	0.050503	0.796706		YJR055W	358.787	0.333767	0.0469437			YOR302W		YMR056C
	YDL146W	124.566	-1.99448	3.03047e-14		YDL181W	6475.56	0.56884	1.11363e-06			YDL215C					YJR056C	1582.05	0.330191	4.17954e-05		YJR056C	1582.05	0.926248	2.24108e-35			YMR055C		YDR532C
	YDL147W	3571.5	0.170682	0.199892		YDL182W	957.423	0.756854	6.11012e-08			YNL221C					YJR057W	1430.01	0.0756039	0.41006		YJR057W	1430.01	-0.0519064	0.556541			YPL024W		YIR010W
	YDL148C	647.098	-0.290053	0.0795325		YDL183C	57.5912	-0.699591	0.0712107			YLR254C					YJR058C	1133.39	0.246104	0.0549338		YJR058C	1133.39	-0.227008	0.0685099			YGR057C		YMR262W
	YDL149W	59.3712	0.161575	0.67584		YDL184C	21209	1.14987	0.227485			YLR337C					YJR059W	3669.33	0.179838	0.00890192		YJR059W	3669.33	-0.175809	0.00831857			YFR008W		YJL112W
	YDL150W	526.22	-0.514378	0.00178338		YDL185W	1590.58	0.597759	3.25934e-05			YLR456W					YJR060W	2404.6	-0.111519	0.14234		YJR060W	2404.6	0.486393	6.83309e-13			YDR406W		YMR086C-A
	YDL153C	1051.17	-0.672594	3.55686e-07		YDL187C	137.274	-0.133654	0.649648			YIL006W					YJR061W	992.578	-0.261671	0.0131537		YJR061W	992.578	0.510272	6.33065e-08			YDL130W-A		YLR360W
	YDL155W	373.691	0.295274	0.100264		YDL188C	1652.48	0.0821347	0.596073			YER175C					YJR062C	2005.36	0.584797	4.65739e-17		YJR062C	2005.36	0.609087	1.26338e-19			YBL071W-A		YLL007C
	YDL156W	15.294	7.12485	9.52453e-06		YDL189W	195.992	0.754649	0.000566579			YNL176C					YJR063W	2675.41	0.106323	0.121681		YJR063W	2675.41	-0.400985	2.04815e-10			YHR105W		YNL146W
	YDL157C	3010.39	-0.807435	1.10909e-06		YDL190C	601.518	0.135244	0.44501			YPR158W					YJR064W	6035.01	-0.85017	5.98149e-63		YJR064W	6035.01	-0.894522	5.30925e-74			YHR213W		YML083C
	YDL159W	219.899	0.305102	0.172337		YDL191W	109833	0.835512	5.75425e-14			YPL174C					YJR065C	6862.71	-0.0947611	0.0785224		YJR065C	6862.71	-0.503281	3.82431e-24			YOR177C		YPL109C
	YDL160C	1432.51	0.194626	0.193819		YDL192W	21986.1	0.463787	0.000123436			YEL048C					YJR066W	6383.21	-0.627563	4.50157e-28		YJR066W	6383.21	-0.0551532	0.356913			YCR038W-A		YKL088W
	YDL160C-A	596.489	-0.77525	2.03366e-07		YDL193W	745.568	0.00668992	0.971408			YGL155W					YJR067C	674.716	0.237755	0.100553		YJR067C	674.716	-0.222588	0.110773			YOR005C		YOL055C
	YDL161W	1161.57	-0.457974	0.000574443		YDL194W	88.9017	-0.505749	0.135334			YPL213W					YJR068W	2269.98	-0.365433	2.07215e-07		YJR068W	2269.98	-0.179731	0.0084404			YOR383C		YGR212W
	YDL164C	294.818	0.165754	0.403713		YDL195W	1834.27	0.0185639	0.912009			YDR130C					YJR069C	1951.28	-0.401904	3.20974e-08		YJR069C	1951.28	-0.581629	3.21604e-17			YOL048C		YCL068C
	YDL165W	500.402	-0.397368	0.0118129		YDL196W	22.8667	-0.378327	0.560199			YHL035C					YJR070C	4521.8	-0.748486	1.46703e-33		YJR070C	4521.8	-0.75526	5.10429e-36			YOR023C		YKL201C
	YDL166C	342.034	-0.45555	0.00946925		YDL197C	245.14	-0.694053	0.00142184			YBR083W					YJR071W	7.51244	1.10242	0.340369		YJR071W	7.51244	0.487108	0.671734			YHR014W		YGL035C
	YDL167C	1032.97	-0.471903	0.000444088		YDL198C	2914.72	-0.123024	0.387867			YOL108C					YJR072C	2741.41	-0.295462	4.33594e-05		YJR072C	2741.41	-0.339443	8.8836e-07			YLR136C		YER061C
	YDL168W	741.882	0.0228956	0.891579		YDL199C	60.3699	0.312189	0.436592			YKL023W					YJR073C	4694.21	1.22434	2.29614e-82		YJR073C	4694.21	0.144889	0.028349			YMR194C-B		YJL147C
	YDL169C	72.8081	0.943792	0.00391259		YDL200C	306.164	-0.126235	0.580359			YCR054C					YJR074W	1685.04	0.282918	0.000744643		YJR074W	1685.04	-0.0582521	0.503207			YPL092W		YDR295C
	YDL170W	299.933	1.0227	6.99596e-08		YDL201W	872.554	0.290001	0.0542402			YIL097W					YJR075W	3774.74	-0.69484	1.49323e-32		YJR075W	3774.74	-0.857501	3.14837e-52			YDR059C		YFR046C
	YDL171C	1177.24	-1.04613	3.80495e-15		YDL202W	655.116	0.00666525	0.974742			YML050W					YJR076C	3685.88	-0.501923	2.01324e-16		YJR076C	3685.88	-0.194526	0.00105167			YKL164C		YEL064C
	YDL173W	374.72	-0.0721463	0.716049		YDL203C	175.364	0.08215	0.785918			YLR132C					YJR077C	7601.8	-1.01229	4.8539e-81		YJR077C	7601.8	-1.38688	6.69044e-157			YML002W		YDR439W
	YDL174C	1339.52	0.0833655	0.57783		YDL204W	472.645	-1.6116	1.80943e-22			YOR080W					YJR078W	788.395	-0.684313	3.84017e-10		YJR078W	788.395	-0.738583	5.0732e-13			YER069W		YGL174W
	YDL175C	214.728	0.577224	0.00574719		YDL205C	1528.88	0.0490185	0.763008			YAL048C					YJR079W	171.585	-0.233341	0.332691		YJR079W	171.585	-0.596905	0.00566461			YGR133W		YHL023C
	YDL176W	250.524	1.29616	4.30371e-11		YDL206W	130.335	-0.0867762	0.779507			YDR379W					YJR080C	2198.22	0.0627349	0.40065		YJR080C	2198.22	-0.202216	0.00248796			YLR165C		YJR156C
	YDL177C	282.716	0.749716	0.00011582		YDL207W	471.927	-0.741135	6.95894e-06			YDR319C					YJR082C	1362.7	0.440542	1.80081e-07		YJR082C	1362.7	-0.00994484	0.916252			YFR034W-A		YJL088W
	YDL178W	493.008	-0.847772	5.11907e-06		YDL208W	8573.77	0.298143	0.022403			YDL044C					YJR083C	1038.52	0.43075	3.84443e-05		YJR083C	1038.52	0.95317	1.36363e-22			YMR174C		YKR051W
	YDL179W	430.504	0.540932	0.00122811		YDL209C	171.125	-0.0330614	0.907822			YLR168C					YJR084W	1362.57	0.214052	0.0177023		YJR084W	1362.57	0.539196	6.94998e-11			YHL021C		YLR426W
	YDL180W	121.599	0.343268	0.194522		YDL211C	119.028	-0.485597	0.0805769			YEL019C					YJR085C	2965.03	-0.501204	6.49045e-14		YJR085C	2965.03	-1.08097	4.14729e-63			YAR035W		YDL156W
	YDL181W	5656.22	-1.14783	6.50447e-24		YDL212W	12141.7	0.28493	0.0523271			YKR101W					YJR086W	673.771	0.0986998	0.446754		YJR086W	673.771	-0.150762	0.207612			YNL314W		YOR026W
	YDL182W	1120.4	-0.236911	0.0848267		YDL213C	1716.45	0.439756	0.00280639			YNR034W					YJR087W	283.952	-0.0741598	0.709942		YJR087W	283.952	-0.344545	0.0475814			YEL063C		YHR219W
	YDL183C	111.023	2.01202	3.10241e-12		YDL215C	112.15	-0.519834	0.0702902			YGR133W					YJR088C	2838.22	-0.293626	3.2477e-05		YJR088C	2838.22	-0.315431	2.86105e-06			YPL072W		YJR128W
	YDL184C	18925.1	-1.80445	0.0206635		YDL216C	106.866	-0.439934	0.161149			YBL060W					YJR089W	1815.63	-0.191572	0.0366508		YJR089W	1815.63	0.699874	3.43252e-17			YOR024W		YDL057W
	YDL185W	1480.68	-0.90407	4.48513e-13		YDL217C	278.058	0.0770983	0.763591			YLR363C					YJR090C	4545.68	-0.497587	8.16157e-21		YJR090C	4545.68	0.353129	2.3666e-12			YMR262W		YBR065C
	YDL187C	360.933	2.16029	1.02793e-32		YDL219W	1675.31	-0.191702	0.184299			YDL138W					YJR091C	8581.87	-0.159264	0.00244637		YJR091C	8581.87	0.0741494	0.157492			YML133C		YNL309W
	YDL188C	1465.7	-0.490409	0.000129341		YDL220C	294.473	-0.140549	0.520597			YBR237W					YJR092W	3921.24	-0.324947	2.34197e-06		YJR092W	3921.24	0.139024	0.0410645			YPR168W		YOR368W
	YDL189W	356.777	0.907819	2.07399e-07		YDL222C	39.989	-8.52071	8.89449e-08			YDR254W					YJR093C	1738.33	0.171454	0.0329738		YJR093C	1738.33	0.462487	3.08679e-10			YIL087C		YAL034C
	YDL190C	529.62	-0.579016	0.000549918		YDL224C	1332.39	-0.225846	0.11646			YHR198C					YJR094C	508.255	-0.0803108	0.607085		YJR094C	508.255	0.341472	0.0104672			YDR386W		YMR154C
	YDL191W	99493.6	-1.31245	1.087e-26		YDL225W	391.104	-0.0267235	0.903194			YGR194C					YJR094W-A	5670.38	-0.170025	0.00276292		YJR094W-A	5670.38	-1.1885	1.0393e-106			YLR284C		YMR156C
	YDL192W	20800.8	-0.689884	2.54002e-09		YDL226C	768.185	0.239669	0.126582			YIR025W					YJR095W	182.959	1.74059	1.35046e-10		YJR095W	182.959	1.59412	1.03963e-09			YLR345W		YOL072W
	YDL193W	775.235	0.082646	0.607515		YDL227C	309.497	0.661981	0.000544491			YCL030C					YJR096W	1374.79	0.547137	2.63736e-10		YJR096W	1374.79	0.389475	3.0061e-06			YCL027W		YPL119C-A
	YDL194W	94.0848	0.623535	0.0382727		YDL229W	31288.5	0.480632	0.00028236			YPL124W					YJR097W	1036.29	0.558039	3.71308e-08		YJR097W	1036.29	0.894305	1.1123e-20			YGL249W		YLR289W
	YDL195W	1773.51	-0.141351	0.331388		YDL230W	295.1	-0.0958908	0.671047			YBR203W					YJR098C	932.387	0.00983046	0.936792		YJR098C	932.387	0.941574	5.3295e-23			YLR120W-A		YNL097C
	YDL196W	40.3811	1.59835	0.000230663		YDL231C	1283.04	-1.2435	4.84795e-21			YIR014W					YJR099W	1403.69	-0.0740973	0.40872		YJR099W	1403.69	-0.404019	3.29864e-07			YHR018C		YOL017W
	YDL197C	536.345	2.22881	3.56271e-39		YDL232W	2776.4	1.19515	4.00815e-21			YIL116W					YJR100C	1511.51	0.488486	7.10401e-10		YJR100C	1511.51	0.655209	3.15272e-18			YOR363C		YLR108C
	YDL198C	2650.62	-0.175586	0.166054		YDL233W	171.742	0.745023	0.00106736			YJL162C					YJR101W	2241.09	-0.1242	0.0854373		YJR101W	2241.09	-0.18835	0.00494141			YKL068W-A		YOR308C
	YDL199C	114.526	1.25752	4.88754e-06		YDL234C	222.02	0.643259	0.0021052			YDR214W					YJR102C	904.677	0.125935	0.244078		YJR102C	904.677	0.134458	0.183059			YGL007C-A		YIL071C
	YDL200C	366.724	0.571157	0.00115516		YDL235C	4379.82	-0.153785	0.239577			YDL106C					YJR103W	4045.76	0.112668	0.0709314		YJR103W	4045.76	-0.397051	6.78087e-12			YOR242C		YOL135C
	YDL201W	754.31	-0.837739	2.01678e-09		YDL236W	1015.55	0.209031	0.201487			YLR263W					YJR104C	8472.66	-0.106143	0.0505346		YJR104C	8472.66	-1.32737	3.22985e-150			YFR020W		YNL325C
	YDL202W	709.783	0.195564	0.204072		YDL237W	867.261	0.190361	0.300845			YDR109C					YJR105W	10595.6	-0.63085	4.96743e-32		YJR105W	10595.6	-1.6182	1.43937e-205			YCR054C		YPL022W
	YDL203C	211.547	0.412394	0.0698497		YDL238C	179.776	-0.095075	0.734625			YDR231C					YJR106W	2467.81	0.151293	0.12909		YJR106W	2467.81	0.0110103	0.917678			YCR086W		YML023C
	YDL204W	541.928	1.85337	1.43542e-30		YDL240W	168.337	0.341633	0.165561			YLR201C					YJR107W	1250.49	0.113507	0.307774		YJR107W	1250.49	-0.121214	0.253198			YOR162C		YLR006C
	YDL205C	1179.62	-0.983124	3.09193e-14		YDL241W	224.798	0.789266	0.000105058			YPL253C					YJR108W	242.273	1.33196	1.28446e-11		YJR108W	242.273	1.20904	2.76663e-10			YGL158W		YER034W
	YDL206W	109.207	-0.484509	0.0778297		YDL243C	136.349	-0.78289	0.00220026			YKL095W					YJR109C	11684.3	0.716451	3.89306e-52		YJR109C	11684.3	0.0459685	0.366335			YHR104W		YOR358W
	YDL207W	376.89	0.159756	0.382726		YDR001C	821.845	-0.298108	0.0839506			YGL212W					YJR110W	1280.26	0.530122	8.68053e-09		YJR110W	1280.26	0.89884	7.63177e-25			YJL065C		YBR239C
	YDL208W	8949.96	-0.187335	0.141357		YDR002W	6487.59	-0.062059	0.687286			YDR459C					YJR111C	1805.39	0.319666	5.26707e-05		YJR111C	1805.39	0.759404	1.30968e-24			YDL020C		YOR177C
	YDL209C	232.866	0.793489	7.06577e-05		YDR003W	1008.41	-0.171876	0.262927			YOR037W					YJR112W	790.241	0.278733	0.0128106		YJR112W	790.241	0.852499	3.3958e-17			YHR219W		YEL067C
	YDL211C	133.756	0.745355	0.00413962		YDR003W-A	29.0029	-8.06021	5.3314e-07			YPR061C					YJR112W-A	745.111	0.860467	1.28071e-14		YJR112W-A	745.111	0.122945	0.295661			YMR170C		YJR112W
	YDL212W	12740.9	-0.157378	0.27534		YDR004W	312.404	-0.873448	1.74089e-06			YGL256W					YJR113C	2421.3	-0.172943	0.0486059		YJR113C	2421.3	0.135539	0.108612			YGR287C		YKR017C
	YDL213C	1782.88	-0.339539	0.0194554		YDR005C	569.303	0.318954	0.0529829			YNL063W					YJR114W	41.2292	0.61262	0.222957		YJR114W	41.2292	-0.949038	0.0540076			YOL117W		YER068W
	YDL215C	153.139	1.20195	7.33682e-07		YDR006C	645.116	-0.0269785	0.89162			YLR381W					YJR115W	575.579	1.17591	2.44168e-19		YJR115W	575.579	0.55347	2.12308e-05			YKL124W		YHR129C
	YDL216C	142.317	1.08296	1.9471e-05		YDR007W	370.122	-1.20297	9.60385e-12			YER184C					YJR116W	2244.32	-0.0562741	0.47086		YJR116W	2244.32	-0.545796	1.98956e-15			YNL138W-A		YOR304C-A
	YDL217C	274.019	-0.143	0.541229		YDR009W	15.2335	-7.12949	1.73247e-05			YCL051W					YJR117W	8344.06	-0.28933	1.4369e-08		YJR117W	8344.06	-0.548399	1.39237e-28			YKL091C		YOR350C
	YDL219W	1290.08	-0.650493	8.79037e-07		YDR011W	845.231	0.286485	0.0920168			YDR126W					YJR118C	1872.48	-0.53188	9.34171e-11		YJR118C	1872.48	-0.449777	1.12996e-08			YLL018C-A		YGR238C
	YDL220C	320.215	0.343909	0.060704		YDR012W	20094.3	0.148126	0.305057			YDR462W					YJR119C	1135	0.381056	5.79826e-05		YJR119C	1135	0.947201	3.40764e-27			YCR027C		YMR127C
	YDL221W	23.6794	7.75546	8.17547e-07		YDR013W	466.824	-0.185436	0.468386			YOR054C					YJR120W	1018.44	-0.367067	7.57985e-05		YJR120W	1018.44	-1.13512	8.8437e-38			YHR194W		YLR131C
	YDL222C	70.6106	9.33172	9.45842e-10		YDR014W	216.881	-0.602386	0.00436832			YNL047C					YJR121W	24439.8	-0.471597	2.501e-28		YJR121W	24439.8	-1.05901	9.36883e-140			YER024W		YML053C
	YDL224C	1695.86	0.799553	2.1516e-09		YDR016C	647.466	0.300148	0.0593657			YBR212W					YJR122W	1608.71	0.0859883	0.291382		YJR122W	1608.71	0.357948	6.57301e-07			YPR076W		YNL326C
	YDL225W	331.748	-0.516433	0.0033471		YDR017C	219.363	0.210644	0.382721			YNL222W					YJR123W	17782.3	-0.677993	3.56029e-43		YJR123W	17782.3	-1.46287	1.19088e-198			YLR271W		YCR063W
	YDL226C	752.03	-0.33214	0.0251666		YDR018C	33.9325	-8.28597	2.03523e-07			YOR279C					YJR124C	3095.78	-0.31379	5.42379e-06		YJR124C	3095.78	0.132953	0.0506898			YER041W		YHR035W
	YDL227C	258.993	-1.49386	5.88643e-15		YDR019C	781.416	-2.62796	4.00941e-69			YCR075W-A					YJR126C	3379.33	-0.691545	1.80162e-28		YJR126C	3379.33	-0.397668	3.42567e-11			YKR101W		YCR015C
	YDL229W	26022.1	-1.26314	5.19549e-25		YDR020C	494.541	-0.318796	0.0643802			YLR036C					YJR127C	5245.61	0.648846	2.40978e-25		YJR127C	5245.61	0.248383	7.15266e-05			YBR065C		YOR018W
	YDL230W	359.86	0.588678	0.000602811		YDR021W	132.371	0.117438	0.698855			YKL168C					YJR128W	131.841	2.03171	6.03386e-11		YJR128W	131.841	0.868017	0.00587835			YGL128C		YNL282W
	YDL231C	1432.44	1.44941	1.52432e-29		YDR022C	485.475	-0.200118	0.28316			YPL047W					YJR129C	808.608	-0.373091	0.000360669		YJR129C	808.608	0.0836958	0.422385			YBR008C		YJL065C
	YDL232W	3175.36	-0.665383	8.55274e-06		YDR023W	5396.83	0.605771	4.88391e-07			YLR246W					YJR130C	2169.42	0.989099	1.46678e-45		YJR130C	2169.42	0.807242	1.73069e-32			YCR081W		YBR168W
	YDL233W	208.432	-0.115498	0.60899		YDR025W	34059.8	0.316441	0.0321803			YNL282W					YJR131W	2122.36	0.0951038	0.24266		YJR131W	2122.36	0.13294	0.0802208			YIL166C		YHR061C
	YDL234C	236.858	-0.440545	0.0296226		YDR026C	323.702	-0.608685	0.00105226			YDR480W					YJR132W	4493.07	-0.536147	1.40344e-23		YJR132W	4493.07	0.129274	0.0144183			YGL059W		YLR417W
	YDL235C	3610.98	-0.457156	8.73636e-05		YDR027C	179.028	-0.202264	0.430301			YDL216C					YJR133W	1571.46	-0.0653932	0.493089		YJR133W	1571.46	-0.294674	0.000492523			YDR374W-A		YOR223W
	YDL236W	924.03	-0.54711	0.000246038		YDR028C	1093.25	-0.365804	0.00933669			YPL133C					YJR134C	2140.68	-0.0885968	0.294153		YJR134C	2140.68	0.259985	0.000600423			YDR223W		YML111W
	YDL237W	761.248	-0.655839	3.72145e-06		YDR030C	122.625	0.0562928	0.862884			YGR030C					YJR135C	520.442	0.603422	5.3114e-06		YJR135C	520.442	0.574015	6.56295e-06			YDR076W		YDL183C
	YDL238C	186.015	0.167968	0.474957		YDR031W	833.248	-0.297111	0.0485349			YNL240C					YJR135W-A	1012.84	0.0328171	0.761339		YJR135W-A	1012.84	-0.974804	3.77309e-26			YLR408C		YDR336W
	YDL240W	190.137	0.00725203	0.976033		YDR032C	3194.26	0.465202	0.223063			YCR071C					YJR136C	1126.72	0.450514	9.1786e-07		YJR136C	1126.72	1.08301	1.22939e-36			YJL049W		YHR155W
	YDL241W	287.341	0.00412364	0.984538		YDR033W	28011.3	1.04001	7.41005e-10			YDR490C					YJR137C	5567.74	-0.822	1.95594e-51		YJR137C	5567.74	-0.649938	1.98997e-34			YPL003W		YGR112W
	YDL243C	392.879	2.75684	8.21398e-48		YDR034C	459.279	-0.245667	0.169864			YGL045W					YJR138W	3341.87	-0.153222	0.0167728		YJR138W	3341.87	0.60414	3.66915e-25			YIR007W		YGL045W
	YDR001C	905.337	0.522859	0.00152665		YDR034C-D	157.706	1.93726	7.60536e-16			YOR161C					YJR139C	7581.7	-0.566346	1.47981e-25		YJR139C	7581.7	-1.66276	4.49657e-212			YOR203W		YFL027C
	YDR002W	5736.54	-0.333998	0.00863063		YDR034W-B	333.102	1.02596	9.89019e-09			YJR135C					YJR140C	3186.99	-0.202902	0.00105671		YJR140C	3186.99	0.468097	2.97357e-16			YDR133C		YGL073W
	YDR003W	1398.65	0.946374	1.21357e-13		YDR035W	818.454	0.277883	0.0786284			YPL257W					YJR140W-A	2.16808	-1.05996	0.60689		YJR140W-A	2.16808	-2.22907	0.250623			YLL066C		YER081W
	YDR003W-A	77.9737	9.47474	4.68663e-10		YDR036C	421.795	0.458557	0.0072019			YKR049C					YJR141W	504.795	-0.378793	0.00894511		YJR141W	504.795	0.52545	6.79861e-05			YNL274C		YKL005C
	YDR004W	280.293	0.605517	0.00114171		YDR037W	7080.06	-0.203046	0.188798			YLR313C					YJR142W	1825.87	-0.0479642	0.592777		YJR142W	1825.87	-0.118388	0.142671			YNL204C		YML064C
	YDR005C	653.806	0.0749434	0.650123		YDR040C	19.2563	-7.46754	5.00364e-06			YMR048W					YJR143C	11950.2	-0.836061	8.33742e-54		YJR143C	11950.2	-1.29511	3.94392e-130			YCR073W-A		YDR065W
	YDR006C	746.154	0.397625	0.00614179		YDR041W	997.698	-0.0396781	0.827421			YGR058W					YJR144W	1939.19	-0.562704	7.05963e-14		YJR144W	1939.19	-0.500225	2.84244e-12			YIR028W		YDR387C
	YDR007W	816.705	2.64094	9.44631e-64		YDR042C	170.145	1.43336	4.70904e-10			YHR142W					YJR145C	12737	-0.699493	1.40257e-36		YJR145C	12737	-1.37107	4.60855e-139			YIL009C-A		YNL329C
	YDR008C	27.0294	7.94638	3.83473e-07		YDR043C	358.033	0.663249	0.000225584			YLL066C					YJR146W	309.799	0.179417	0.293323		YJR146W	309.799	-1.01459	9.2032e-11			YDR448W		YMR075W
	YDR009W	36.6829	8.38685	5.97894e-08		YDR044W	726.484	-0.189037	0.244266			YGL209W					YJR147W	3151.49	-0.602192	3.20452e-20		YJR147W	3151.49	-1.492	6.09084e-120			YCR024C		YDL139C
	YDR011W	1257.61	0.754196	6.50729e-06		YDR045C	1980.62	0.0431723	0.815363			YIR009W					YJR148W	6138.91	-0.354139	5.7833e-10		YJR148W	6138.91	-1.18397	1.76046e-100			YDL247W-A		YMR025W
	YDR012W	16782.1	-0.793065	2.13472e-10		YDR046C	2184.22	-0.080783	0.60255			YLL018C-A					YJR149W	867.68	0.486399	1.86921e-06		YJR149W	867.68	0.804016	4.76028e-17			YMR120C		YPR141C
	YDR013W	513.905	0.418117	0.0577639		YDR047W	2266.56	0.161054	0.257221			YML091C					YJR150C	32.1129	-0.286408	0.712283		YJR150C	32.1129	-2.56626	0.00139437			YPL185W		YBL039W-B
	YDR014W	229.091	0.71348	0.000420484		YDR049W	190.953	-0.0582592	0.829603			YDR516C					YJR151C	1715.13	1.5865	3.30453e-20		YJR151C	1715.13	1.63817	8.01869e-22			YDR265W		YGR110W
	YDR016C	743.937	0.0925434	0.56831		YDR050C	71555.8	0.264611	0.114978			YPL064C					YJR152W	2633.22	1.49265	2.70711e-72		YJR152W	2633.22	2.08674	1.56478e-152			YCL038C		YDR275W
	YDR017C	201.295	-0.51884	0.0180475		YDR051C	575.297	-0.233148	0.166214			YIL117C					YJR153W	239.373	2.13436	1.52794e-29		YJR153W	239.373	0.702639	0.000277697			YER060W-A		YGL056C
	YDR018C	47.9908	8.77456	1.13211e-08		YDR052C	219.781	-0.22804	0.325109			YCR095C					YJR154W	890.527	2.02458	1.18632e-72		YJR154W	890.527	2.05707	6.04724e-79			YEL048C		YIL006W
	YDR019C	641.572	2.27815	1.32148e-49		YDR054C	645.581	-0.28626	0.0742548			YHR090C					YJR155W	1133.66	1.77952	1.00166e-77		YJR155W	1133.66	1.55496	1.94389e-62			YOR382W		YHL042W
	YDR020C	410.126	-0.235361	0.196601		YDR055W	1687.38	0.288491	0.0311532			YGR169C-A					YJR156C	203.206	1.8057	6.88163e-18		YJR156C	203.206	0.87066	3.3694e-05			YPR001W		YOR244W
	YDR021W	129.81	-0.199816	0.463143		YDR056C	2950.97	0.297691	0.0207608			YAL015C					YJR157W	4.90103	0.156859	0.919235		YJR157W	4.90103	-0.0991954	0.945936			YEL067C		YLR431C
	YDR022C	554.531	0.522079	0.00136105		YDR057W	200.076	-0.111134	0.67003			YBR150C					YJR158W	5.38396	1.71728	0.23255		YJR158W	5.38396	0.542043	0.714613			YBR145W		YNL083W
	YDR023W	5042.57	-0.897925	2.17305e-12		YDR058C	58.7736	-0.151123	0.727931			YER079W					YJR159W	566.146	0.658173	2.44026e-07		YJR159W	566.146	1.10211	3.12373e-20			YDL238C		YGL227W
	YDR025W	27686.1	-1.13619	2.00246e-13		YDR059C	901.8	-0.0779926	0.718278			YLR419W					YJR160C	70.7536	0.190965	0.602415		YJR160C	70.7536	-0.269658	0.432009			YDR131C		YJL013C
	YDR026C	324.317	0.59439	0.00107581		YDR060W	1560.46	-0.202866	0.150949			YMR255W					YJR161C	2811.35	0.486589	1.02524e-13		YJR161C	2811.35	-0.239643	0.000239389			YKR004C		YBR216C
	YDR027C	148.9	-0.368586	0.124166		YDR061W	529.234	-0.0115455	0.952928			YMR156C					YJR162C	3.98447	3.29522	0.1031		YJR162C	3.98447	1.6674	0.421921			YCR060W		YLR278C
	YDR028C	1061.77	0.269811	0.0505181		YDR062W	3002.87	0.500527	3.31237e-05			YJL083W					YBL047C	17947	-0.809149	1.47811e-60		YBL047C	17947	-0.947649	1.40949e-84			YDR358W		YGR064W
	YDR030C	145.59	0.392258	0.106714		YDR063W	1630.99	-0.254483	0.0647991			YDR074W					YBR012W-B	7847.28	-1.39096	2.54787e-181		YBR012W-B	7847.28	-1.87311	0			YCR042C		YBR237W
	YDR031W	824.192	0.248099	0.0939567		YDR064W	109778	0.386321	0.00558135			YDR191W					YBR078W	23433.6	-0.633329	2.59993e-43		YBR078W	23433.6	-1.26592	1.71013e-171			YDR231C		YMR258C
	YDR032C	4079.58	0.247647	0.205731		YDR065W	235.205	-0.409021	0.0655903			YDR255C					YBR140C	13170.8	-0.0464737	0.407289		YBR140C	13170.8	0.163769	0.00133575			YFL030W		YPR202W
	YDR033W	26297.6	-1.3797	0.0171528		YDR066C	196.125	0.552	0.0123745			YOR127W					YBL113C	1662.24	0.545051	0.0111803		YBL113C	1662.24	0.698375	0.000825855			YLR381W		YJL127C
	YDR034C	528.24	0.579805	0.000168858		YDR067C	394.761	-0.380056	0.03565			YCL025C					YBL113W-A	36.206	0.151512	0.77894		YBL113W-A	36.206	-4.48043	4.19702e-11			YDR401W		YBR163W
	YDR034C-D	149.67	-2.41462	2.11974e-21		YDR068W	274.077	-0.515179	0.00900939			YER038W-A					YBL112C	261.331	0.755285	0.00093695		YBL112C	261.331	1.03042	2.34216e-06			YER116C		YEL019C
	YDR034W-B	525.19	0.41327	0.0110742		YDR069C	236.669	-0.632083	0.00212279			YDR046C					YBL111C	1401.49	0.764806	1.02308e-12		YBL111C	1401.49	0.71445	1.02255e-11			YLR227C		YDR008C
	YDR035W	786.05	-0.436332	0.00388246		YDR070C	97.2814	-0.0594749	0.869861			YHL021C					YBL109W	57.5038	0.421644	0.285824		YBL109W	57.5038	-1.04019	0.00551149			YML083C		YPL039W
	YDR036C	431.709	-0.405661	0.013684		YDR071C	3174.53	0.26777	0.033906			YCL027W					YBL108C-A	4.97315	0.845841	0.552088		YBL108C-A	4.97315	-0.310799	0.828812			YIL117C		YGL128C
	YDR037W	6457.82	-0.0790609	0.63636		YDR072C	798.081	0.662174	1.64219e-05			YBR278W					YBL108W	2.69246	0.411193	0.832474		YBL108W	2.69246	-1.1267	0.540796			YKL095W		YPL068C
	YDR039C	23.8859	7.76802	7.8615e-07		YDR073W	1126.22	-0.517428	0.00023779			YIL152W					YBL107W-A	3.36511	0.12556	0.942543		YBL107W-A	3.36511	-2.08172	0.200721			YER139C		YIL100C-A
	YDR040C	123.49	10.138	1.94743e-11		YDR074W	1027.49	-0.664299	1.06513e-06			YLR393W					YBL107C	1067.88	-0.365744	0.000515436		YBL107C	1067.88	-0.26298	0.00936919			YDL119C		YOR010C
	YDR041W	1085.56	0.250655	0.0713334		YDR075W	307.058	0.77245	2.77768e-05			YDL110C					YBL106C	1402.39	0.185008	0.0763443		YBL106C	1402.39	0.535526	2.17378e-08			YDR085C		YDR263C
	YDR042C	159.293	-1.87039	3.28356e-15		YDR076W	137.097	-0.47096	0.0727767			YOR305W					YBL105C	4904.3	-0.250197	0.00021626		YBL105C	4904.3	0.129395	0.0533695			YBL064C		YCR038C
	YDR043C	452.94	0.0686593	0.714274		YDR077W	27570.8	-0.924817	1.13825e-10			YMR155W					YBL104C	2152.59	-0.180769	0.0211749		YBL104C	2152.59	0.371388	2.70589e-07			YLR097C		YLR246W
	YDR044W	702.393	0.0749097	0.640156		YDR078C	308.889	-1.12802	8.19418e-09			YOR025W					YBL103C	2415.53	0.742272	4.6179e-27		YBL103C	2415.53	1.27721	1.78243e-83			YHL018W		YKR080W
	YDR045C	2030.11	0.00699691	0.967847		YDR079C-A	970.428	0.540201	8.5614e-05			YLR139C					YBL102W	3366.75	0.31713	1.62989e-07		YBL102W	3366.75	-0.365749	6.06033e-10			YFL049W		YNL249C
	YDR046C	3278.08	1.0456	2.62852e-14		YDR079W	370.857	0.774809	1.39187e-05			YER040W					YBL101C	3735.2	-0.299775	1.77543e-06		YBL101C	3735.2	0.486014	8.91927e-17			YNL187W		YKR019C
	YDR047W	2615.45	0.226123	0.0775291		YDR080W	129.633	-0.387095	0.161188			YNL011C					YBL100W-C	16.3793	1.47085	0.0609437		YBL100W-C	16.3793	0.541326	0.500867			YEL005C		YLR189C
	YDR048C	13.6356	6.95891	1.79216e-05		YDR081C	204.754	-0.1441	0.568605			YKL208W					YBL100W-B	8451.53	-0.434834	5.23523e-17		YBL100W-B	8451.53	-0.972139	7.42067e-82			YNL092W		YDR425W
	YDR049W	184.184	-0.0689074	0.771776		YDR082W	230.847	-1.16934	1.40238e-08			YLR426W					YBL100W-A	1827.17	-0.79386	3.88177e-22		YBL100W-A	1827.17	-1.80756	2.58036e-111			YHR075C		YGR071C
	YDR050C	65182.4	-0.605492	0.000133364		YDR083W	643.874	0.420801	0.0128587			YKL098W					YBL100C	1.87068	2.7451	0.32437		YBL100C	1.87068	2.03995	0.452895			YBL039W-B		YOR284W
	YDR051C	470.481	-0.385582	0.0197919		YDR084C	1768.92	0.70934	3.22616e-06			YLR288C					YBL099W	11776.5	-0.566852	2.04231e-32		YBL099W	11776.5	-1.03287	2.54731e-107			YHR218W		YIL150C
	YDR052C	207.362	0.0464928	0.842391		YDR085C	342.349	-1.75014	2.32786e-21			YCR003W					YBL098W	746.63	-1.19762	8.18913e-30		YBL098W	746.63	-0.790562	5.99304e-16			YGR149W		YNL188W
	YDR054C	520.839	-0.364074	0.0287419		YDR086C	13630.7	0.622485	9.36073e-08			YOL009C					YBL097W	1061.5	-0.71837	0.0774804		YBL097W	1061.5	0.741362	0.0608356			YDR437W		YJR130C
	YDR055W	2795.31	0.992945	1.62264e-17		YDR087C	973.467	0.324673	0.0292272			YOL001W					YBL096C	44.9971	1.75834	0.000825818		YBL096C	44.9971	1.56198	0.00207339			YBR063C		YGR099W
	YDR056C	2646.21	-0.704169	4.53187e-09		YDR088C	114.089	0.192087	0.542661			YDR541C					YBL095W	1116.81	-0.343217	0.000290365		YBL095W	1116.81	0.272724	0.0021334			YCR075W-A		YPL255W
	YDR057W	183.368	-0.16506	0.496407		YDR089W	249.267	-1.12118	1.85724e-08			YOL119C					YBL094C	67.2867	1.86297	3.38124e-06		YBL094C	67.2867	1.32231	0.000783475			YLR273C		YLR271W
	YDR058C	141.382	2.00626	1.01376e-14		YDR090C	630.813	-0.0181461	0.924103			YDL170W					YBL093C	1924.73	-0.533028	1.63179e-11		YBL093C	1924.73	-0.543303	6.55772e-13			YCR079W		YIL116W
	YDR059C	1526.63	1.2962	1.61092e-16		YDR091C	1779.17	-0.103598	0.523962			YKL031W					YBL092W	8775.88	-0.82856	1.25926e-48		YBL092W	8775.88	-1.53395	1.14675e-166			YLR453C		YPL034W
	YDR060W	1344.26	-0.253568	0.0601313		YDR092W	1129.4	0.221138	0.259733			YGL018C					YBL091C-A	440.873	0.648503	1.52574e-05		YBL091C-A	440.873	0.392796	0.00710991			YNL009W		YLR103C
	YDR061W	437.658	-0.626092	0.00010665		YDR093W	1052.64	-0.0267162	0.878202			YGR110W					YBL091C	4123.65	-0.318507	5.09402e-06		YBL091C	4123.65	-0.836156	1.70316e-35			YOL032W		YBR153W
	YDR062W	2678.96	-0.968224	1.54454e-16		YDR096W	321.535	-0.433227	0.0242292			YGR042W					YBL090W	1463.13	0.14817	0.0922944		YBL090W	1463.13	-0.361974	8.53876e-06			YFR022W		YJL051W
	YDR063W	1483.47	-0.0299593	0.837164		YDR097C	196.372	-0.271205	0.259317			YNL025C					YBL089W	2211.3	0.37526	2.50852e-06		YBL089W	2211.3	0.506305	3.86657e-11			YDR130C		YJR149W
	YDR064W	96820	-0.874775	4.60096e-11		YDR098C	2170.29	0.160454	0.247671			YGL124C					YBL088C	4596.01	0.500928	9.59767e-19		YBL088C	4596.01	0.964013	1.13652e-69			YDR438W		YKL189W
	YDR065W	209.491	0.0800067	0.735206		YDR099W	3068.31	0.422728	0.000555222			YOR292C					YBL087C	7037.92	-0.617342	3.76618e-31		YBL087C	7037.92	-1.38753	1.87158e-155			YCR032W		YKR073C
	YDR066C	221.286	-0.178238	0.411396		YDR100W	1815.59	-0.103969	0.587013			YOR060C					YBL086C	1747.06	0.229161	0.00565501		YBL086C	1747.06	0.738331	2.06408e-22			YJL163C		YNL103W
	YDR067C	396.085	0.368763	0.0305711		YDR101C	3673.14	0.356191	0.00780673			YHR061C					YBL085W	5271.01	-0.350016	2.16388e-11		YBL085W	5271.01	0.101398	0.0512182			YMR017W		YPL138C
	YDR068W	269.24	0.451911	0.0176829		YDR103W	609.562	-0.360964	0.0232241			YBR225W					YBL084C	2086.5	0.0662337	0.414937		YBL084C	2086.5	1.11543	6.16885e-59			YJR112W-A		YHR109W
	YDR069C	271.072	0.923912	1.5778e-06		YDR104C	102.995	-0.229697	0.489895			YKL017C					YBL083C	1273.34	-0.239492	0.0102166		YBL083C	1273.34	-0.291381	0.000942056			YMR156C		YDR252W
	YDR070C	126.506	0.710527	0.00545518		YDR105C	313.095	0.736198	4.82005e-05			YGL114W					YBL082C	3337.95	-0.147252	0.044621		YBL082C	3337.95	-0.201481	0.003806			YLR415C		YDR528W
	YDR071C	3510.79	0.0130289	0.925677		YDR106W	41.2435	0.201549	0.701674			YKL061W					YBL081W	6891.15	-0.526823	0.000155538		YBL081W	6891.15	-0.089057	0.548749			YDL231C		YOR073W
	YDR072C	844.954	-0.483876	0.00202376		YDR107C	421.955	-0.32701	0.0899199			YLR289W					YBL080C	917.838	0.186905	0.0776258		YBL080C	917.838	0.503567	1.3185e-07			YHR217C		YER116C
	YDR073W	1255.07	0.75615	5.01828e-09		YDR108W	165.358	-0.58484	0.0142221			YCL037C					YBL079W	9518.83	-0.253806	1.02759e-06		YBL079W	9518.83	-0.00802892	0.889757			YER188C-A		YPR042C
	YDR074W	1228.77	1.048	6.94458e-13		YDR109C	102.637	-0.867758	0.00224057			YGR075C					YBL078C	1009.61	1.19356	3.75814e-32		YBL078C	1009.61	0.662827	2.46047e-11			YOR379C		YNL082W
	YDR075W	303.387	-0.85076	1.94119e-06		YDR110W	547.486	0.2321	0.177901			YDL113C					YBL076C	18393.8	-0.473074	8.60393e-24		YBL076C	18393.8	-0.927939	1.79723e-89			YPL054W		YEL025C
	YDR076W	159.177	0.806899	0.000444611		YDR111C	56.0938	2.32698	2.30053e-09			YAL061W					YBL075C	2481.93	1.1465	1.36855e-53		YBL075C	2481.93	1.25717	6.92051e-68			YGL104C		YOR269W
	YDR077W	63689.4	2.49714	2.71413e-10		YDR113C	197.409	0.42561	0.0586928			YCL029C					YBL074C	711.132	1.22669	3.27217e-26		YBL074C	711.132	1.53054	8.35476e-43			YML050W		YKR045C
	YDR078C	345.359	1.34163	5.98045e-13		YDR115W	3388.48	0.0199451	0.903455			YHR105W					YBL073W	3.96569	1.0133	0.515765		YBL073W	3.96569	-0.678159	0.66948			YDR147W		YOL009C
	YDR079C-A	1212.76	0.128334	0.367039		YDR116C	784.111	-0.230599	0.175119			YFL024C					YBL072C	12906.1	-0.859183	1.55671e-57		YBL072C	12906.1	-1.56576	6.26759e-191			YOR292C		YKR106W
	YDR079W	401.62	-0.508052	0.00457088		YDR117C	399.813	-0.032559	0.883054			YGR095C					YBL071C-B	208.915	-0.435389	0.0309689		YBL071C-B	208.915	-0.72548	9.77242e-05			YOR020W-A		YDR109C
	YDR080W	118.284	0.124156	0.664781		YDR118W	48.5327	-0.362683	0.425451			YLR103C					YBL071W-A	1122.67	0.983499	4.60863e-27		YBL071W-A	1122.67	0.426942	2.5562e-06			YMR086C-A		YLR165C
	YDR081C	164.442	-0.561793	0.012395		YDR119W	2322.09	0.236533	0.0819865			YCR002C					YBL071C	20.3185	1.03602	0.135634		YBL071C	20.3185	-1.32046	0.0624278			YIR018C-A		YGR062C
	YDR082W	239.084	1.22579	1.49738e-08		YDR119W-A	370.101	-1.23586	2.89623e-12			YJL146W					YBL070C	4.93819	1.57333	0.28469		YBL070C	4.93819	2.00902	0.140531			YPL068C		YLR035C
	YDR083W	614.937	-0.608997	0.000259837		YDR120C	647.445	0.693716	1.1265e-05			YCL002C					YBL069W	1974.51	-0.70039	7.67647e-22		YBL069W	1974.51	-0.1859	0.00831756			YGR194C		YOR211C
	YDR084C	2222.16	0.0141871	0.936811		YDR121W	174.01	0.787674	0.000878759			YJL204C					YBL068W-A	536.997	-0.829836	1.6212e-10		YBL068W-A	536.997	-0.281712	0.0219839			YKL090W		YAL014C
	YDR085C	302.589	1.49921	2.74175e-15		YDR122W	617.901	-0.640802	0.000131572			YNL200C					YBL068W	2347.44	-0.257874	0.000150122		YBL068W	2347.44	-0.214717	0.000972527			YPL229W		YDR104C
	YDR086C	13976	-0.559803	7.91915e-07		YDR123C	383.761	-0.386197	0.033028			YCL044C					YBL067C	3828.78	-1.08516	1.5226e-85		YBL067C	3828.78	-0.271308	2.29041e-07			YKL107W		YDL209C
	YDR087C	907.093	-0.592552	1.81195e-05		YDR124W	261.675	-0.478803	0.0372971			YPL008W					YBL066C	4091.35	-0.0367818	0.630365		YBL066C	4091.35	0.72942	3.79627e-29			YJR039W		YNL164C
	YDR088C	135.698	0.277257	0.277316		YDR125C	88.4185	-0.501018	0.118876			YKR046C					YBL065W	20.093	1.32209	0.0644001		YBL065W	20.093	0.266926	0.722264			YER137C		YPL060W
	YDR089W	194.302	0.54289	0.0110385		YDR126W	157.277	0.211449	0.438715			YIL106W					YBL064C	1761.87	0.87373	7.46252e-28		YBL064C	1761.87	0.257109	0.00131894			YOR358W		YDR343C
	YDR090C	702.777	0.293406	0.0561197		YDR127W	1521.72	0.0722248	0.663124			YDR055W					YBL063W	1684.23	-0.541221	4.08639e-10		YBL063W	1684.23	0.737918	1.5837e-20			YCR087W		YGR031W
	YDR091C	1421.63	-0.632594	1.16129e-06		YDR128W	247.87	-0.187637	0.413667			YMR262W					YBL062W	4.36202	-1.64108	0.355181		YBL062W	4.36202	0.0712246	0.962701			YBR071W		YPR081C
	YDR092W	1085.92	-0.370982	0.0687789		YDR129C	2078.48	-0.282985	0.0349553			YPL068C					YBL061C	4670.25	-0.377417	2.43387e-11		YBL061C	4670.25	0.00689145	0.91192			YKR105C		YJL214W
	YDR093W	901.286	-0.483261	0.000406427		YDR130C	305.781	-0.760011	5.31974e-05			YPL005W					YBL060W	1588.08	1.039	1.13671e-32		YBL060W	1588.08	1.21825	9.2928e-47			YHR048W		YDL175C
	YDR096W	326.421	0.452052	0.0139522		YDR131C	260.117	-0.910526	4.89503e-06			YNL305C					YBL059C-A	1447.88	0.108796	0.241966		YBL059C-A	1447.88	-0.229755	0.00715017			YDR055W		YBR071W
	YDR097C	170.938	-0.142678	0.56916		YDR132C	346.771	0.0581429	0.790019			YPL163C					YBL059W	896.695	0.289735	0.00509806		YBL059W	896.695	-0.128436	0.21181			YGR153W		YDR485C
	YDR098C	2017.74	-0.418661	0.000687725		YDR133C	29133.9	-0.885769	1.96761e-16			YFL013C					YBL058W	4346.33	-0.067482	0.27718		YBL058W	4346.33	-0.293072	1.63343e-07			YMR068W		YIL092W
	YDR099W	2902.87	-0.645244	5.04064e-08		YDR135C	2904.19	0.827277	5.82994e-12			YBL043W					YBL057C	1901.44	-0.290563	8.78379e-05		YBL057C	1901.44	-0.530999	3.6641e-14			YHL032C		YIL095W
	YDR100W	2268.86	0.654567	4.98429e-05		YDR137W	314.102	-0.537803	0.00430541			YMR052W					YBL056W	4711.48	-0.271354	4.60973e-06		YBL056W	4711.48	-0.34387	1.56313e-09			YHL006C		YMR279C
	YDR101C	4182.59	0.0180149	0.903509		YDR138W	365.228	-0.317474	0.0990263			YDR532C					YBL055C	1694.51	-0.693874	1.55867e-19		YBL055C	1694.51	-0.436203	2.19098e-09			YIL023C		YHR118C
	YDR103W	581.657	0.217919	0.166688		YDR139C	1332.18	0.831344	1.37062e-10			YLL033W					YBL054W	3775.98	-0.659824	1.94781e-25		YBL054W	3775.98	-0.368274	2.08767e-09			YDR332W		YOL034W
	YDR104C	107.804	0.328265	0.246505		YDR140W	2338.61	-0.248059	0.0627091			YCR082W					YBL053W	38.6105	-0.498685	0.320698		YBL053W	38.6105	-0.770565	0.0925228			YDR003W		YAL027W
	YDR105C	338.645	-0.478334	0.00641519		YDR141C	650.725	-0.14563	0.430881			YOR285W					YBL052C	1652.5	-0.21205	0.0319235		YBL052C	1652.5	0.353064	0.000128691			YER079W		YGR057C
	YDR106W	44.5207	0.00405644	0.993018		YDR142C	478.886	-0.275709	0.123269			YPL155C					YBL051C	6748.37	-0.0233611	0.726662		YBL051C	6748.37	0.265052	3.92675e-06			YBR214W		YGL051W
	YDR107C	313.888	-0.58853	0.00223568		YDR143C	478.188	0.181905	0.324459			YMR104C					YBL050W	2725.78	-0.0169832	0.827792		YBL050W	2725.78	-0.249452	0.000141131			YCR071C		YPL036W
	YDR108W	123.739	-0.224438	0.407178		YDR144C	1060.92	0.0462464	0.801379			YKL075C					YBL049W	594.031	2.2361	4.21404e-46		YBL049W	594.031	-0.356592	0.040402			YHL046C		YKL033W
	YDR109C	116.211	1.1201	2.00304e-05		YDR145W	754.953	-0.214206	0.219582			YDR497C					YBL048W	216.974	2.40272	8.29852e-20		YBL048W	216.974	-0.218173	0.475679			YIL006W		YDL025C
	YDR110W	532.918	-0.343313	0.0300052		YDR146C	240.439	-0.16694	0.467312			YPR085C					YBL046W	1337.81	-0.207298	0.316889		YBL046W	1337.81	0.382356	0.0479716			YCR005C		YOR030W
	YDR111C	135.126	0.907533	0.000747761		YDR147W	370.16	-0.760915	4.52602e-05			YIR015W					YBL045C	7175.34	-0.309946	4.5997e-10		YBL045C	7175.34	-0.606857	1.77783e-36			YLR313C		YDR333C
	YDR113C	262.738	0.382867	0.0621147		YDR148C	1035.21	0.27697	0.0558534			YPL267W					YBL044W	19.8209	0.347192	0.630552		YBL044W	19.8209	0.0713035	0.92039			YBR228W		YMR103C
	YDR114C	13.4083	6.93502	1.935e-05		YDR150W	577.078	-0.163893	0.371332			YFL016C					YBL043W	1268.68	0.621318	1.58624e-11		YBL043W	1268.68	0.411496	4.71105e-06			YBL010C		YOR334W
	YDR115W	3397.57	-0.0339743	0.832077		YDR151C	658.429	-0.0521618	0.77682			YMR199W					YBL042C	7912.09	-0.140944	0.00452302		YBL042C	7912.09	-0.114583	0.0177779			YGR121W-A		YNL198C
	YDR116C	725.315	-0.00724498	0.967847		YDR152W	1113.65	-0.0989525	0.53867			YCR092C					YBL041W	3672.95	-0.192626	0.00342561		YBL041W	3672.95	-0.166704	0.00824192			YAL054C		YGL125W
	YDR117C	345.817	-0.441105	0.0127916		YDR153C	380.934	0.191692	0.332987			YPL077C					YBL040C	3541.6	0.0770194	0.250019		YBL040C	3541.6	-0.140253	0.0237189			YKL051W		YDR176W
	YDR118W	39.537	-0.242426	0.602213		YDR154C	141.365	-10.345	2.26854e-11			YPL151C					YBL039W-B	240.699	0.871098	5.025e-06		YBL039W-B	240.699	0.830523	5.4764e-06			YOR377W		YHR004C
	YDR119W	1914.11	-0.964584	1.88031e-14		YDR155C	43184.5	1.29344	2.63763e-31			YLL010C					YBL039C	8058.02	-0.632631	2.38567e-41		YBL039C	8058.02	-0.810168	4.62229e-70			YIR009W		YER096W
	YDR119W-A	549.876	1.98141	1.43542e-30		YDR156W	7928.94	-0.148395	0.280698			YFL042C					YBL039C-A	1917.32	-0.574705	2.53239e-15		YBL039C-A	1917.32	-0.765909	2.95491e-28			YIL045W		YNL218W
	YDR120C	662.66	-0.636054	0.000104591		YDR158W	11052.3	-0.0727461	0.602207			YMR120C					YBL038W	2087.44	0.174305	0.0195897		YBL038W	2087.44	-0.0408507	0.592115			YFR054C		YNL106C
	YDR121W	172.928	-0.844199	0.000110276		YDR159W	291.05	-0.551891	0.00386106			YGR031W					YBL037W	2934.57	-0.0862387	0.248743		YBL037W	2934.57	0.342192	3.27392e-07			YOR059C		YBL031W
	YDR122W	598.216	0.545619	0.000611101		YDR160W	218.465	-0.529027	0.0132008			YEL016C					YBL036C	2004	-0.476941	2.1685e-08		YBL036C	2004	-0.51245	3.65586e-10			YCR003W		YMR070W
	YDR123C	467.466	0.838497	2.28939e-07		YDR161W	780.745	0.711876	8.28748e-07			YDL087C					YBL035C	2034.98	0.0657326	0.440667		YBL035C	2034.98	0.503812	1.16868e-11			YCL033C		YBR161W
	YDR124W	494.779	1.80706	1.89617e-22		YDR162C	234.423	-0.257476	0.261951			YFR034C					YBL034C	2907.03	-0.639856	3.8977e-21		YBL034C	2907.03	0.499081	4.14346e-15			YNL260C		YKL139W
	YDR125C	121.787	1.20207	6.45012e-06		YDR163W	218.688	-0.213644	0.375351			YMR312W					YBL033C	2273.09	0.145435	0.0381763		YBL033C	2273.09	0.243071	0.000182904			YMR081C		YCR106W
	YDR126W	267.253	1.10134	8.25682e-09		YDR164C	373.007	0.284294	0.131869			YER104W					YBL032W	3640.19	-0.554787	1.30422e-21		YBL032W	3640.19	-0.474523	1.88802e-17			YBR138C		YJR111C
	YDR127W	1702.72	0.222384	0.130262		YDR165W	1312.78	0.204476	0.176554			YPL274W					YBL031W	949.745	-0.206712	0.0598795		YBL031W	949.745	0.762953	4.10724e-15			YGR092W		YPL140C
	YDR128W	249.04	0.178991	0.386251		YDR166C	518.312	-0.214061	0.228038			YLR284C					YBL030C	11594.8	-0.539843	5.33012e-26		YBL030C	11594.8	-1.30551	3.73562e-148			YBR098W		YJL222W
	YDR129C	1830.58	-0.093119	0.496407		YDR167W	1486.87	0.110197	0.496315			YCR077C					YBL029C-A	1165.26	0.276085	0.00288359		YBL029C-A	1165.26	-0.133827	0.144896			YGR030C		YLR455W
	YDR130C	374.108	1.18361	1.10834e-11		YDR168W	884.068	0.0347557	0.843242			YLR177W					YBL029W	713.321	0.0587406	0.638197		YBL029W	713.321	0.981589	1.58353e-21			YLR101C		YGR030C
	YDR131C	319.129	1.3264	6.38867e-13		YDR169C	280.763	-0.219359	0.352236			YHR194W					YBL028C	2152.94	-0.224614	0.00330429		YBL028C	2152.94	-0.562016	5.08766e-15			YOR161C		YKL023W
	YDR132C	404.38	0.343245	0.0483702		YDR170C	773.324	-0.229404	0.148171			YDR003W					YBL027W	10834.8	-0.732434	4.07982e-43		YBL027W	10834.8	-1.43121	7.63116e-164			YLR457C		YHL020C
	YDR133C	52907.3	2.04697	1.70489e-82		YDR171W	308.94	-0.280817	0.189282			YGR008C					YBL026W	1735.52	-0.300111	0.000316042		YBL026W	1735.52	-0.532326	1.24373e-11			YLR237W		YGR065C
	YDR135C	3030.24	-0.691987	4.79163e-09		YDR172W	2941.25	-0.509534	3.63015e-05			YML020W					YBL025W	743.405	0.43024	0.000106229		YBL025W	743.405	1.04439	2.9565e-24			YMR154C		YOR059C
	YDR137W	339.98	0.70795	0.000151024		YDR173C	68.1309	0.578819	0.166557			YCR028C					YBL024W	6992.96	-0.561363	7.23122e-31		YBL024W	6992.96	-0.452192	8.25243e-22			YPL236C		YEL016C
	YDR138W	318.692	-0.0820608	0.679556		YDR174W	4916.12	-1.12901	2.49055e-22			YJL090C					YBL023C	3444.48	-0.180516	0.0117342		YBL023C	3444.48	0.0352388	0.633251			YGL154C		YMR179W
	YDR139C	1321.19	-0.89634	2.1264e-10		YDR175C	801.381	0.180102	0.277981			YDL169C					YBL022C	6653.29	-0.408642	2.07194e-16		YBL022C	6653.29	-0.0757994	0.132084			YDR453C		YDR246W-A
	YDR140W	2607.46	0.506238	3.08137e-05		YDR176W	250.286	-0.320285	0.136842			YGR088W					YBL021C	735.267	0.482165	4.79751e-05		YBL021C	735.267	0.749275	1.94492e-11			YCR025C		YPL242C
	YDR141C	657.09	0.151897	0.342813		YDR177W	1637.4	0.422958	0.00108599			YPL034W					YBL020W	4106	-0.855947	3.98677e-43		YBL020W	4106	-0.137105	0.0262635			YCR095C		YPL144W
	YDR142C	426.928	-0.0655588	0.744931		YDR178W	2595.13	0.183578	0.179452			YNL261W					YBL019W	1035.04	0.656828	3.06536e-12		YBL019W	1035.04	1.15801	1.30131e-38			YKL123W		YBR182C
	YDR143C	414.118	-0.696037	3.37585e-05		YDR179C	363.368	-0.159743	0.426807			YKL218C					YBL018C	736.661	0.0860527	0.460709		YBL018C	736.661	-0.515138	7.0883e-07			YDR070C		YDR359C
	YDR144C	746.433	-1.41667	1.90802e-20		YDR179W-A	139.288	0.125857	0.688187			YER159C					YBL017C	9739.15	-0.353833	1.68825e-12		YBL017C	9739.15	-0.409719	5.99231e-17			YLR288C		YMR144W
	YDR145W	753.333	0.187593	0.212553		YDR180W	202.844	-0.266967	0.257221			YNL102W					YBL016W	3705.75	0.141288	0.0282503		YBL016W	3705.75	0.0974025	0.120943			YNL294C		YKL115C
	YDR146C	220.256	-0.105363	0.635307		YDR181C	167.791	-0.175445	0.527884			YMR086C-A					YBL015W	2205.55	-0.0546028	0.512113		YBL015W	2205.55	0.0934049	0.220914			YOR226C		YOR156C
	YDR147W	581.052	1.67501	1.65022e-23		YDR182W	782.251	0.556711	0.00015569			YGL003C					YBL014C	2529.42	-0.458212	1.75563e-12		YBL014C	2529.42	0.449638	1.44083e-13			YDR541C		YDR370C
	YDR148C	1044.39	-0.273193	0.0460995		YDR183W	473.462	-0.135237	0.476827			YJR109C					YBL013W	464.907	0.367287	0.00666433		YBL013W	464.907	0.381463	0.00289929			YBR169C		YLR173W
	YDR150W	486.019	-0.373237	0.0255		YDR184C	1665.37	-0.174105	0.22043			YER034W					YBL012C	6.02063	0.521228	0.718837		YBL012C	6.02063	0.700931	0.589967			YIR034C		YCR018C-A
	YDR151C	821.276	0.605339	1.34987e-05		YDR185C	255.607	-0.430387	0.039395			YHL023C					YBL011W	4008.82	-0.58606	1.01634e-21		YBL011W	4008.82	-0.483583	3.77201e-16			YGL072C		YBR197C
	YDR152W	977.756	-0.313998	0.0253585		YDR186C	415.51	0.218412	0.239174			YLR166C					YBL010C	1031.78	0.818325	3.81113e-17		YBL010C	1031.78	0.936365	1.20751e-23			YLL019C		YDR242W
	YDR153C	386.651	-0.169782	0.371399		YDR188W	3015.01	0.0782037	0.594696			YMR270C					YBL009W	2146.66	-0.600586	7.1455e-18		YBL009W	2146.66	-0.0929531	0.180478			YGL254W		YDR338C
	YDR154C	86.8426	9.62999	2.43672e-10		YDR189W	448.804	-0.222985	0.222746			YER139C					YBL008W-A	33.9557	-0.83702	0.107485		YBL008W-A	33.9557	-0.113593	0.822783			YNR014W		YBL021C
	YDR155C	43911.8	-1.24814	1.71854e-27		YDR190C	3011.59	0.0986053	0.501946			YBR152W					YBL008W	2119.01	-0.422838	2.58932e-09		YBL008W	2119.01	0.166872	0.0147343			YKL168C		YLR133W
	YDR156W	8497.33	0.313201	0.0068431		YDR191W	62.724	-0.570304	0.130867			YDR252W					YBL007C	11867.2	-0.620223	8.65529e-26		YBL007C	11867.2	-0.87367	4.4212e-51			YHL040C		YLR352W
	YDR158W	9991.72	-0.249946	0.0347245		YDR192C	94.2119	-0.161417	0.643592			YPL177C					YBL006C	2382.07	0.221094	0.00824272		YBL006C	2382.07	0.0949629	0.258241			YOL107W		YER069W
	YDR159W	231.279	-0.0820311	0.707728		YDR194C	1029.64	-0.300769	0.0398165			YBR256C					YBL006W-A	30.1654	0.122549	0.833211		YBL006W-A	30.1654	-0.562669	0.277335			YDR462W		YIL105C
	YDR160W	239.948	0.73334	0.000176543		YDR195W	95.0383	0.102633	0.774052			YKL150W					YBL005W	1962.98	0.003966	0.963932		YBL005W	1962.98	0.120443	0.0975193			YIR005W		YJL058C
	YDR161W	766.801	-0.811508	6.73863e-09		YDR196C	1254.03	-0.405872	0.00283953			YLR098C					YBL005W-B	18759.8	-1.36644	7.65775e-203		YBL005W-B	18759.8	-2.12425	0			YJL023C		YCL048W-A
	YDR162C	306.833	0.88906	9.39416e-07		YDR197W	259.422	-0.126666	0.585799			YBR230W-A					YBL005W-A	10102.2	-1.34531	1.91482e-160		YBL005W-A	10102.2	-2.23949	0			YCL052C		YAL010C
	YDR163W	220.533	0.215017	0.335112		YDR198C	261.324	0.249857	0.261984			YDR242W					YBL004W	14724.7	-0.894245	4.11076e-89		YBL004W	14724.7	-0.550754	5.2764e-36			YNL230C		YJL199C
	YDR164C	356.837	-0.456471	0.00892879		YDR200C	250.395	-0.536781	0.0133262			YOR026W					YBL003C	3595.83	-0.618966	1.8652e-22		YBL003C	3595.83	-1.23499	6.10469e-89			YOR064C		YEL061C
	YDR165W	1202.02	-0.52068	0.000137662		YDR201W	589.519	0.000440187	0.998707			YOL159C					YBL002W	8189.38	-0.09132	0.0828213		YBL002W	8189.38	-0.782943	2.95861e-58			YPL025C		YGL222C
	YDR166C	467.711	-0.0977415	0.588278		YDR202C	260.098	0.127443	0.588609			YDR318W					YBL001C	1717.22	-0.0869704	0.318466		YBL001C	1717.22	-1.1887	1.15901e-51			YML129C		YJL150W
	YDR167W	1477.94	-0.152021	0.309087		YDR204W	419.515	-0.667188	7.26961e-05			YDR069C					YBR001C	2326.06	0.339007	6.31784e-06		YBR001C	2326.06	0.202535	0.00598193			YPL144W		YDR495C
	YDR168W	783.491	-0.438044	0.00559078		YDR205W	674.16	-0.0663603	0.751867			YPR120C					YBR002C	2328.55	-0.230047	0.00121365		YBR002C	2328.55	0.258315	0.000106552			YKR052C		YOR037W
	YDR169C	293.093	0.312634	0.107171		YDR206W	651.862	-0.602885	6.58277e-05			YMR197C					YBR003W	2866.14	-0.276177	1.22992e-05		YBR003W	2866.14	0.0940306	0.129998			YBR194W		YDR137W
	YDR170C	660.188	-0.250524	0.281055		YDR207C	138.837	-0.250266	0.363608			YOR363C					YBR004C	3071.33	-0.0543076	0.434269		YBR004C	3071.33	-0.157129	0.0123042			YPL034W		YDR444W
	YDR171W	385.595	0.801764	4.46002e-06		YDR208W	778.294	-0.470069	0.00202472			YCR033W					YBR005W	1787.94	0.249935	0.00153297		YBR005W	1787.94	-0.16718	0.0301563			YIR015W		YML109W
	YDR172W	2408.96	-0.0442559	0.750839		YDR210W	4885.37	-0.148541	0.366828			YDR313C					YBR006W	2134.16	0.739842	2.84941e-21		YBR006W	2134.16	0.324554	2.34642e-05			YBR269C		YDR306C
	YDR173C	69.5764	-0.530112	0.181001		YDR211W	991.446	-0.164275	0.310523			YMR094W					YBR007C	2714.66	-0.0237445	0.769854		YBR007C	2714.66	0.649376	1.98099e-22			YAL034C		YOL113W
	YDR174W	1554.38	-14.2987	6.50593e-22		YDR212W	3249.86	-0.244514	0.0610461			YFR022W					YBR008C	2251.38	0.927862	3.93463e-35		YBR008C	2251.38	0.654122	8.09899e-19			YMR101C		YBR057C
	YDR175C	803.223	-0.196442	0.193195		YDR213W	68.7487	0.189897	0.677807			YNL245C					YBR009C	6994.87	-0.280911	8.33618e-10		YBR009C	6994.87	-0.86115	1.10452e-84			YOR227W		YDR501W
	YDR176W	259.93	0.39706	0.0428267		YDR214W	3796.78	-0.181343	0.179025			YOR205C					YBR010W	4500.69	-0.234173	0.000365667		YBR010W	4500.69	-0.897988	2.55365e-46			YDR074W		YNL076W
	YDR177W	1992.8	0.148693	0.258206		YDR216W	236.305	-3.59498	2.81177e-43			YNL074C					YBR011C	11397.2	-0.983002	1.91642e-74		YBR011C	11397.2	-1.60652	2.75262e-200			YLR366W		YLR396C
	YDR178W	2875.83	0.0947885	0.478379		YDR217C	188.119	0.181299	0.472491			YCR005C					YBR012W-A	2305.56	-1.59047	4.8539e-81		YBR012W-A	2305.56	-2.05103	1.84809e-140			YPL119C		YMR172W
	YDR179C	484.969	0.850759	9.22396e-08		YDR219C	257.85	-0.302642	0.158888			YER116C					YBR014C	1932.47	-0.0797266	0.293963		YBR014C	1932.47	-0.394497	5.2055e-09			YLR168C		YBL086C
	YDR179W-A	130.53	-0.35335	0.177927		YDR221W	514.821	-0.42847	0.0117455			YJR082C					YBR015C	7403.75	-0.976095	1.89258e-86		YBR015C	7403.75	-0.76919	1.64849e-57			YDR285W		YBL063W
	YDR180W	142.121	-0.912133	0.000118027		YDR222W	433.702	0.686645	2.98432e-05			YLR460C					YBR016W	3276.94	-0.130878	0.0508826		YBR016W	3276.94	-0.494146	1.17353e-15			YLR385C		YBR255W
	YDR181C	209.604	0.711493	0.00179035		YDR223W	26.1899	-7.91174	9.02699e-07			YMR152W					YBR017C	7419	-0.222442	3.39114e-05		YBR017C	7419	-0.0486968	0.381206			YPL071C		YNR063W
	YDR182W	706.66	-0.982513	4.12411e-12		YDR224C	11617.5	1.50041	1.16766e-32			YKL159C					YBR018C	115.841	1.75133	7.15842e-08		YBR018C	115.841	2.34338	3.01766e-14			YKL093W		YIL155C
	YDR183W	452.186	-0.0160736	0.930872		YDR225W	34075.2	0.49085	0.000801446			YMR053C					YBR019C	189.731	1.28349	2.89132e-09		YBR019C	189.731	0.515846	0.0176109			YDR078C		YBR278W
	YDR184C	1472.23	-0.205798	0.122489		YDR226W	10329.1	0.478514	6.28256e-05			YCR009C					YBR020W	315.582	1.40055	2.30658e-13		YBR020W	315.582	1.52448	2.22727e-16			YBL111C		YEL063C
	YDR185C	266.671	0.515787	0.00703255		YDR227W	90.197	-0.538683	0.0976402			YCR046C					YBR021W	3012.11	0.256121	0.00525353		YBR021W	3012.11	0.447108	3.50506e-07			YDL022W		YCL061C
	YDR186C	589.093	0.692998	3.9328e-06		YDR228C	734.552	-0.256891	0.125237			YDL189W					YBR022W	897.225	0.262435	0.00948866		YBR022W	897.225	-0.0276658	0.793614			YLR346C		YNL159C
	YDR188W	2694.94	-0.459341	0.000118326		YDR229W	103.298	-0.059329	0.869861			YDR111C					YBR023C	11523.2	0.00399759	0.943501		YBR023C	11523.2	-0.192943	3.49394e-05			YMR053C		YMR064W
	YDR189W	406.368	-0.0778282	0.669662		YDR231C	503.794	-0.555968	0.000587663			YBL088C					YBR024W	767.892	0.063951	0.621897		YBR024W	767.892	0.0560371	0.64459			YLR246W		YLR254C
	YDR190C	3172.6	0.030837	0.827581		YDR232W	3658.61	0.540527	1.53067e-05			YIR034C					YBR025C	10311.2	-0.610636	2.29638e-44		YBR025C	10311.2	-1.13806	1.0438e-155			YAL048C		YML119W
	YDR191W	78.0715	1.04768	0.000709915		YDR233C	12090.2	0.954748	2.4698e-18			YOR382W					YBR026C	2872.35	0.00576368	0.939919		YBR026C	2872.35	-0.456942	1.39134e-13			YKR080W		YLR226W
	YDR192C	95.0306	0.163498	0.603195		YDR234W	1239.85	0.221674	0.13647			YGL116W					YBR027C	166.235	-0.177443	0.453543		YBR027C	166.235	-0.328902	0.123067			YKL218C		YHL032C
	YDR194C	716.51	-0.885212	6.40276e-10		YDR235W	451.232	-0.0489905	0.814597			YPL214C					YBR028C	2503.93	-0.143598	0.0334787		YBR028C	2503.93	0.226252	0.00030966			YOL154W		YHR167W
	YDR195W	98.7302	-0.0129891	0.967847		YDR236C	1131.99	-0.547626	6.28256e-05			YGL059W					YBR029C	5227.52	-0.00185323	0.977188		YBR029C	5227.52	-0.129176	0.0258464			YIR032C		YGL223C
	YDR196C	1216.41	0.307974	0.0220969		YDR237W	587.336	-0.246515	0.142031			YEL005C					YBR030W	1973.69	0.508236	2.01295e-09		YBR030W	1973.69	0.818966	1.12887e-23			YCR028C		YJL100W
	YDR197W	224.196	-0.333387	0.118666		YDR238C	1335.09	8.54507e-05	0.999438			YCR090C					YBR031W	9854.77	-0.649018	5.00651e-36		YBR031W	9854.77	-1.50741	2.14064e-191			YNL159C		YBL066C
	YDR198C	311.969	0.240853	0.221678		YDR239C	156.315	0.521521	0.0346564			YOR179C					YBR032W	2.57879	-2.45227	0.207266		YBR032W	2.57879	-1.17993	0.479757			YPR046W		YCL024W
	YDR200C	259.353	0.602252	0.00161717		YDR240C	110.91	0.39831	0.174419			YFR036W					YBR033W	534.762	2.09056	1.92404e-50		YBR033W	534.762	0.941671	2.20007e-11			YIL049W		YKR087C
	YDR201W	549.471	-0.235623	0.143512		YDR242W	51.484	-0.544231	0.192553			YOL083W					YBR034C	4765.72	-0.580506	1.12837e-23		YBR034C	4765.72	-0.449738	1.18449e-15			YGR042W		YOL023W
	YDR202C	264.573	-0.0982942	0.646002		YDR243C	268.788	-0.0467177	0.845995			YGL194C-A					YBR035C	2594.43	-0.0687972	0.329567		YBR035C	2594.43	-0.740084	2.92893e-32			YBL112C		YHR075C
	YDR204W	397.72	0.520781	0.00202208		YDR244W	107.83	-0.235287	0.449116			YEL020C					YBR036C	7200.26	-0.0552075	0.345109		YBR036C	7200.26	-0.527708	5.97676e-24			YPL267W		YDR195W
	YDR205W	797.846	0.489007	0.00469908		YDR245W	1939.95	0.467627	0.000194418			YNR013C					YBR037C	1668.01	0.330545	4.20071e-05		YBR037C	1668.01	0.379371	7.77712e-07			YJL079C		YCL051W
	YDR206W	639.615	0.53877	0.000391007		YDR246W	532.102	-0.141608	0.439948			YDR162C					YBR038W	5523.69	-0.452026	7.87043e-10		YBR038W	5523.69	-0.459607	1.65708e-10			YPL064C		YDR364C
	YDR207C	168.084	0.705123	0.0016498		YDR246W-A	9.70024	-6.47928	0.000165981			YBR066C					YBR039W	4886.49	-0.447929	1.1653e-15		YBR039W	4886.49	-0.764237	2.77483e-45			YCR083W		YFR014C
	YDR208W	717.208	0.240161	0.127586		YDR247W	548.589	0.994412	9.76217e-10			YGR268C					YBR040W	343.333	-0.307091	0.600919		YBR040W	343.333	-1.09419	0.0419555			YKR009C		YDL206W
	YDR210W	3995.71	-0.490591	0.00106612		YDR248C	496.547	0.613682	0.00111994			YLR385C					YBR041W	4481.95	-0.592484	1.43524e-28		YBR041W	4481.95	-0.496632	4.54134e-22			YDR480W		YER015W
	YDR211W	823.483	-0.418676	0.00440961		YDR249C	755.954	-0.880836	2.29826e-08			YML109W					YBR042C	1469.26	-1.01114	1.03216e-34		YBR042C	1469.26	-0.131258	0.0994086			YNL012W		YMR306W
	YDR212W	2757.7	-0.252032	0.0468829		YDR251W	933.923	0.320227	0.0460481			YJR097W					YBR043C	4044.65	2.02935	2.96603e-290		YBR043C	4044.65	1.51031	2.69083e-164			YCR082W		YFR045W
	YDR213W	87.8093	0.468342	0.174784		YDR252W	259.41	-0.65551	0.00120835			YBR292C					YBR044C	1807.41	-0.00570484	0.948815		YBR044C	1807.41	0.426653	1.77854e-09			YLR042C		YOR113W
	YDR214W	5709.28	1.12699	3.9151e-21		YDR253C	41.9376	0.21209	0.666571			YNL300W					YBR045C	465.101	-0.072138	0.635007		YBR045C	465.101	0.382152	0.00310201			YDR350C		YKL062W
	YDR216W	484.719	4.68265	3.89901e-83		YDR254W	280.92	-0.884048	5.18402e-06			YBL091C-A					YBR046C	982.972	0.227716	0.043335		YBR046C	982.972	-0.053619	0.64112			YIL017C		YLR382C
	YDR217C	185.402	-0.251024	0.293757		YDR255C	404.156	-1.38147	9.23831e-16			YER180C-A					YBR047W	223.979	1.06418	1.1528e-06		YBR047W	223.979	0.713093	0.000872958			YHR134W		YJR035W
	YDR219C	235.317	0.0324927	0.889521		YDR257C	941.941	-0.580835	2.97175e-05			YNL294C					YBR048W	9998.73	-0.690949	5.79236e-37		YBR048W	9998.73	-1.42377	2.34226e-155			YIL152W		YMR036C
	YDR221W	361.371	-0.658	0.000185479		YDR258C	333.619	-0.14019	0.49937			YBR077C					YBR049C	4091.42	-0.511279	2.91962e-12		YBR049C	4091.42	-0.199258	0.00614916			YCL025C		YNL205C
	YDR222W	487.734	-0.30527	0.0589087		YDR259C	152.187	-1.52857	3.3639e-10			YHR195W					YBR050C	185.752	1.22093	6.04947e-08		YBR050C	185.752	1.04152	1.7104e-06			YAL037W		YBR119W
	YDR223W	37.1105	8.40351	5.58556e-08		YDR260C	909.333	-0.656748	5.00362e-06			YGR288W					YBR051W	23.0178	1.97125	0.00219475		YBR051W	23.0178	0.280009	0.69098			YGR222W		YER109C
	YDR224C	13560.3	-0.815714	8.25459e-09		YDR261C	380.154	0.402161	0.0264926			YNL015W					YBR052C	2402.97	-0.00378734	0.963499		YBR052C	2402.97	-0.928822	1.36539e-44			YNL309W		YPL228W
	YDR225W	37757.2	-0.179788	0.246505		YDR262W	604.396	0.218138	0.216989			YPR071W					YBR053C	2269.5	0.394749	7.83794e-08		YBR053C	2269.5	-0.0100892	0.901603			YBL103C		YOR129C
	YDR226W	7987.99	-1.65108	1.79987e-44		YDR263C	31.8811	-1.05848	0.0359981			YJL004C					YBR054W	4328.14	-0.421344	8.18424e-11		YBR054W	4328.14	-0.873489	7.32185e-44			YMR117C		YGL124C
	YDR227W	97.0413	0.693812	0.0240514		YDR264C	1243.06	-0.186401	0.231183			YGR247W					YBR055C	2893.87	0.101352	0.152063		YBR055C	2893.87	0.480531	5.04427e-14			YDR126W		YBL111C
	YDR228C	1216.9	1.38418	1.48541e-23		YDR265W	186.503	-0.151596	0.565653			YDR466W					YBR056W	2616.54	0.311977	1.64395e-06		YBR056W	2616.54	-0.168033	0.00876154			YLL056C		YLR234W
	YDR229W	97.6317	-0.126328	0.680026		YDR266C	435.968	-0.117271	0.549082			YGL179C					YBR056W-A	794.951	0.374753	0.00264889		YBR056W-A	794.951	0.155396	0.207743			YLR466W		YDL179W
	YDR231C	651.93	1.11945	2.47309e-14		YDR267C	561.446	-0.197476	0.259459			YKR029C					YBR056C-B	33.5344	0.914594	0.0651918		YBR056C-B	33.5344	0.311495	0.536606			YGL256W		YHR209W
	YDR232W	3512.69	-0.717704	1.31167e-09		YDR268W	364.47	-0.319157	0.0956294			YOR367W					YBR057C	1722.76	0.213098	0.0100083		YBR057C	1722.76	0.740049	1.77043e-22			YBR006W		YDR351W
	YDR233C	12031.7	-1.00839	3.29991e-20		YDR270W	294.998	0.105088	0.636664			YPR200C					YBR058C	3721.24	-0.0113731	0.881868		YBR058C	3721.24	0.0462914	0.500867			YGL243W		YMR168C
	YDR234W	1321.16	-0.0520524	0.718681		YDR272W	1084.47	0.291252	0.0518938			YGR057C					YBR058C-A	1326.91	-0.301892	0.000325967		YBR058C-A	1326.91	-0.941713	2.31137e-32			YGR205W		YOR075W
	YDR235W	458.688	0.0734255	0.69473		YDR275W	674.365	0.00326132	0.987523			YMR016C					YBR059C	5840.44	-0.0856949	0.147179		YBR059C	5840.44	-0.0425403	0.467843			YGL247W		YBR047W
	YDR236C	1204.31	0.677427	3.02375e-07		YDR276C	26018.2	1.16143	1.29441e-21			YMR154C					YBR060C	2028.11	-0.255949	0.000449385		YBR060C	2028.11	0.15388	0.027786			YLL067C		YPL116W
	YDR237W	486.118	-0.329624	0.0426175		YDR277C	137.091	-1.50279	1.39299e-08			YOR352W					YBR061C	1826.09	0.100004	0.219313		YBR061C	1826.09	0.177724	0.017389			YEL030W		YCR024C
	YDR238C	1103.16	-0.643875	1.37411e-06		YDR279W	330.808	0.353688	0.0636055			YBR053C					YBR062C	742.067	0.142287	0.218309		YBR062C	742.067	-0.00177769	0.988305			YOR026W		YPL161C
	YDR239C	148.056	-0.75044	0.00136832		YDR280W	786.571	-0.164137	0.3586			YDL115C					YBR063C	1023.09	0.86946	1.98486e-18		YBR063C	1023.09	0.985408	9.65648e-25			YJL127C-B		YDR256C
	YDR240C	99.6566	-0.815213	0.0030694		YDR281C	784.521	2.94982	9.5227e-87			YBR153W					YBR064W	2.4491	1.57926	0.459526		YBR064W	2.4491	1.37353	0.50592			YLR176C		YCL064C
	YDR242W	61.1487	0.92602	0.00742822		YDR282C	282.356	-0.096236	0.688187			YOR248W					YBR065C	1626.99	0.929639	3.52433e-34		YBR065C	1626.99	0.86782	1.13845e-31			YGR230W		YDR138W
	YDR243C	273.411	0.0735141	0.72269		YDR283C	226.293	0.37252	0.695386			YOR113W					YBR066C	1048.08	0.0144828	0.897573		YBR066C	1048.08	0.592783	2.26872e-11			YBR280C		YNL158W
	YDR244W	103.426	0.10022	0.738813		YDR284C	1021.87	0.557043	9.98373e-05			YKR013W					YBR067C	7227.67	0.0556735	0.294377		YBR067C	7227.67	-1.18523	5.0325e-134			YOL083W		YLR277C
	YDR245W	1751.02	-0.87953	1.84935e-12		YDR286C	273.595	-0.911001	9.57431e-06			YGR179C					YBR068C	19841.6	0.358566	4.08195e-15		YBR068C	19841.6	-0.304248	1.97031e-11			YGR068C		YOL095C
	YDR246W	613.455	0.491395	0.00135268		YDR287W	298.425	0.144699	0.506971			YHL026C					YBR069C	8042.82	-0.156276	0.00436688		YBR069C	8042.82	-0.520705	1.75077e-23			YGR008C		YMR283C
	YDR246W-A	15.0895	7.10535	1.00197e-05		YDR288W	422.294	-0.269498	0.141655			YMR121C					YBR070C	1103.36	0.148376	0.125913		YBR070C	1103.36	-0.0849657	0.369041			YOL112W		YDR142C
	YDR247W	576.356	-0.820556	1.29513e-05		YDR289C	335.269	0.0341411	0.883984			YBR197C					YBR071W	4488.28	0.836233	2.6507e-43		YBR071W	4488.28	0.775951	3.32241e-39			YFR014C		YLR238W
	YDR248C	473.162	-0.828246	2.75429e-07		YDR291W	385.944	-0.66768	0.000131572			YML113W					YBR072W	1788.68	1.79493	3.43059e-65		YBR072W	1788.68	0.257669	0.0202522			YGR238C		YOR033C
	YDR249C	689.138	0.651397	4.64078e-05		YDR292C	441.804	-0.0270938	0.899395			YGL104C					YBR072C-A	25.285	-0.750986	0.214288		YBR072C-A	25.285	-1.36247	0.013995			YOR041C		YMR216C
	YDR250C	26.1991	7.90129	4.50407e-07		YDR293C	957.087	0.375416	0.00995412			YAL020C					YBR073W	6130.88	0.0525577	0.388772		YBR073W	6130.88	-0.108173	0.0548055			YCR002C		YKL116C
	YDR251W	905.179	-0.449268	0.00353049		YDR294C	1889.56	0.437139	0.000625996			YJR035W					YBR074W	6575.98	-0.388137	4.53301e-16		YBR074W	6575.98	-0.326047	2.3576e-12			YKR076W		YHL019C
	YDR252W	294.923	0.92915	4.32907e-07		YDR295C	100.327	-0.190006	0.583831			YDR179C					YBR076W	60.4879	0.158191	0.735701		YBR076W	60.4879	-0.176022	0.683054			YDR516C		YBR167C
	YDR253C	91.8059	1.60525	8.38567e-08		YDR296W	1142.6	-0.424016	0.00267908			YHR129C					YBR076C-A	918.807	0.486408	2.28173e-06		YBR076C-A	918.807	0.0684948	0.528106			YKR049C		YBR097W
	YDR254W	319.32	1.14434	1.68291e-10		YDR297W	2713.59	0.330905	0.00847439			YPR167C					YBR077C	1610.71	0.677943	1.74959e-18		YBR077C	1610.71	0.606447	5.44942e-16			YGL117W		YLR166C
	YDR255C	346.373	1.04765	2.11852e-08		YDR298C	4846.7	-0.154423	0.389824			YAL005C					YBR079C	11921.1	-0.670449	3.31912e-49		YBR079C	11921.1	-0.738706	6.58518e-62			YMR279C		YPR070W
	YDR257C	858.163	0.329287	0.0205081		YDR299W	566.06	-0.0208222	0.913741			YBR231C					YBR080C	4986.97	-0.276362	8.42371e-07		YBR080C	4986.97	-0.143129	0.00930674			YIL116W		YAL063C-A
	YDR258C	568.908	1.35461	3.40032e-19		YDR300C	477.289	-0.515232	0.00230652			YLR306W					YBR081C	3997.71	-0.351902	2.80503e-06		YBR081C	3997.71	0.364514	4.37997e-07			YMR135C		YJR153W
	YDR259C	89.2674	0.337114	0.265306		YDR301W	243.401	0.0014363	0.99713			YPL175W					YBR082C	8666.32	-0.229119	1.76429e-05		YBR082C	8666.32	-1.03128	2.69259e-89			YEL016C		YPL008W
	YDR260C	958.691	0.762089	6.36751e-08		YDR302W	1541.29	-0.0422039	0.838403			YBR216C					YBR083W	4269.87	0.580969	1.44974e-19		YBR083W	4269.87	0.609819	2.15749e-22			YHR090C		YOR386W
	YDR261C	311.086	-1.22886	1.90258e-11		YDR303C	509.758	0.221303	0.209578			YLR194C					YBR084W	8732.37	-0.809878	7.07767e-67		YBR084W	8732.37	-0.718308	1.41485e-55			YOR222W		YER013W
	YDR262W	685.059	0.127483	0.446919		YDR304C	3626.17	0.365737	0.00307951			YDR123C					YBR084C-A	11108.5	-0.802172	3.38326e-55		YBR084C-A	11108.5	-1.32932	8.76042e-153			YPL164C		YLR211C
	YDR263C	46.0813	1.77612	1.81195e-05		YDR305C	127.052	-0.170041	0.58232			YPR174C					YBR085W	309.852	-0.614177	0.000427374		YBR085W	309.852	-0.528448	0.00117937			YER104W		YDR484W
	YDR264C	1398.99	0.472582	0.00108468		YDR306C	351.076	-0.169043	0.418436			YCR094W					YBR085C-A	2929.18	0.703109	1.2918e-27		YBR085C-A	2929.18	-0.457152	1.5174e-12			YJR109C		YPR066W
	YDR265W	225.002	0.610599	0.00260568		YDR307W	405.582	0.684683	7.37092e-05			YBL064C					YBR086C	15350.7	-1.19257	2.85399e-135		YBR086C	15350.7	-0.998341	2.14619e-98			YNL200C		YDR393W
	YDR266C	445.178	0.153749	0.384191		YDR308C	401.319	0.063684	0.763008			YIL050W					YBR087W	1969.16	-0.364108	5.39473e-07		YBR087W	1969.16	-0.0274051	0.718061			YGR110W		YKL086W
	YDR267C	583.308	0.27871	0.0784701		YDR309C	605.343	-0.205322	0.257173			YER041W					YBR088C	2953.36	0.00699711	0.934828		YBR088C	2953.36	-0.120374	0.0938848			YDR001C		YJR089W
	YDR268W	332.431	0.0491703	0.80551		YDR310C	178.247	0.290767	0.262088			YGR003W					YBR089W	14.0794	1.98639	0.0103735		YBR089W	14.0794	-0.66312	0.436559			YHR067W		YER033C
	YDR270W	344.064	0.302802	0.110606		YDR311W	256.86	-0.806691	3.9933e-05			YKR076W					YBR089C-A	2309.78	-0.129647	0.0643984		YBR089C-A	2309.78	-0.551805	1.07871e-17			YOR284W		YPR160W
	YDR272W	1232.15	0.0693707	0.651719		YDR312W	434.407	0.239997	0.189368			YLR204W					YBR090C	2016.46	-0.0640179	0.406621		YBR090C	2016.46	-0.461581	1.26439e-11			YAL014C		YGR073C
	YDR275W	810.392	0.467202	0.00088909		YDR313C	47.2833	-0.648224	0.145884			YPR082C					YBR091C	739.756	0.367664	0.00219475		YBR091C	739.756	0.135361	0.259435			YGR018C		YLR362W
	YDR276C	26889.4	-1.04546	2.52611e-14		YDR314C	204.714	-0.597204	0.00623646			YOR357C					YBR092C	7808.87	0.0563867	0.308814		YBR092C	7808.87	-0.282721	1.77444e-08			YDL087C		YOR034C-A
	YDR277C	279.889	2.76381	3.97e-36		YDR315C	426.432	-0.835672	5.92375e-07			YDL119C					YBR093C	4667.48	-3.02992	0		YBR093C	4667.48	-1.62525	2.47425e-177			YDR253C		YMR270C
	YDR279W	306.114	-0.650539	0.000278231		YDR316W	478.121	-0.340124	0.0490832			YFR018C					YBR094W	2722.34	-0.372827	4.54526e-08		YBR094W	2722.34	0.296205	4.83287e-06			YDL216C		YBL113C
	YDR280W	903.949	0.503898	0.000992924		YDR316W-A	266.318	1.78536	1.86901e-20			YBL102W					YBR095C	1795.88	0.0935764	0.304409		YBR095C	1795.88	0.537312	1.72122e-11			YDR260C		YKL076C
	YDR281C	706.988	-6.61713	4.12943e-119		YDR317W	66.2528	0.645954	0.0781771			YHR177W					YBR096W	3705.15	0.0826002	0.216097		YBR096W	3705.15	-0.655256	3.14596e-27			YKR022C		YDL177C
	YDR282C	299.554	0.23621	0.242551		YDR318W	210.832	-0.597868	0.00752532			YPL233W					YBR097W	2575.83	-0.332912	2.25567e-06		YBR097W	2575.83	0.704514	2.01845e-27			YNR064C		YBR297W
	YDR283C	322.157	0.591675	0.619376		YDR319C	992.324	-0.143336	0.360517			YMR140W					YBR098W	937.959	0.808199	5.34354e-15		YBR098W	937.959	1.37268	2.0099e-44			YDL218W		YOR208W
	YDR284C	1203.85	-0.0527492	0.755962		YDR320C	310.099	-0.356412	0.0679838			YPL219W					YBR099C	87.0426	-0.0877055	0.819809		YBR099C	87.0426	1.46171	1.06106e-06			YNL222W		YGL025C
	YDR285W	10.4817	6.5796	6.87368e-05		YDR320C-A	1106.84	1.08262	1.18856e-14			YCL014W					YBR101C	3203.82	-0.0152975	0.828158		YBR101C	3203.82	0.0310832	0.628925			YNL077W		YOR278W
	YDR286C	337.314	1.3372	3.697e-12		YDR320W-B	148.052	-0.512677	0.0504895			YJR100C					YBR102C	2081.57	0.168525	0.0295453		YBR102C	2081.57	0.491286	4.96584e-12			YDR254W		YDR192C
	YDR287W	291.477	-0.240802	0.242535		YDR321W	1899.69	0.457062	0.00119135			YEL025C					YBR103W	1726.64	0.0713494	0.400277		YBR103W	1726.64	0.241368	0.00128696			YCR077C		YER059W
	YDR288W	399.216	0.0958715	0.604375		YDR322C-A	4201.64	0.314857	0.00993809			YCL052C					YBR103C-A	10.8166	1.62807	0.0791461		YBR103C-A	10.8166	-0.544316	0.585206			YBR085C-A		YOR222W
	YDR289C	375.657	0.259308	0.154417		YDR322W	683.875	0.123786	0.470924			YLR352W					YBR104W	1545.23	-0.723529	1.50561e-18		YBR104W	1545.23	-0.182644	0.0223638			YDL176W		YOL089C
	YDR291W	370.664	0.552936	0.00162982		YDR323C	87.6048	-0.924946	0.00301229			YJL049W					YBR105C	4528.31	0.497739	4.31412e-19		YBR105C	4528.31	0.188756	0.000671822			YGL136C		YKR010C
	YDR292C	370.83	-0.552004	0.00211778		YDR324C	748.165	0.536086	0.000321593			YPL071C					YBR106W	4525.75	-1.22628	5.31676e-96		YBR106W	4525.75	-1.23935	5.23617e-105			YPL175W		YDL159W
	YDR293C	978.725	-0.326759	0.024742		YDR325W	313.873	-0.320794	0.118958			YLR227C					YBR107C	576.333	0.502835	4.90473e-05		YBR107C	576.333	0.986635	1.3527e-17			YOR368W		YDL077C
	YDR294C	1801.81	-0.632172	3.75671e-07		YDR326C	612.449	0.618081	0.000168048			YMR135C					YBR108W	2497.45	0.493626	5.20018e-11		YBR108W	2497.45	0.286278	0.000106734			YOR032W-A		YAR003W
	YDR295C	84.187	-0.355849	0.24485		YDR328C	2223.01	-0.111814	0.457514			YPR151C					YBR109C	3914.63	-0.0875961	0.189139		YBR109C	3914.63	-1.02562	7.79401e-64			YLR460C		YJR030C
	YDR296W	1065.31	0.222102	0.123189		YDR329C	313.237	0.306063	0.122884			YKR022C					YBR109W-A	157.259	-0.189947	0.433616		YBR109W-A	157.259	0.0911827	0.69098			YJL155C		YGL085W
	YDR297W	2916.04	-0.129178	0.308106		YDR330W	195.307	-0.114527	0.663124			YGR102C					YBR110W	3171.45	-0.33276	5.19201e-08		YBR110W	3171.45	-0.115854	0.0546321			YLR360W		YDL056W
	YDR298C	3968.76	-0.478671	0.00334561		YDR331W	563.618	0.124432	0.492618			YBR021W					YBR111C	2367.28	0.020449	0.788158		YBR111C	2367.28	-0.907008	2.41733e-45			YKL133C		YDL013W
	YDR299W	510.78	-0.314681	0.0479386		YDR332W	74.8419	-0.0882277	0.822786			YPR017C					YBR111W-A	707.217	0.528224	5.16218e-06		YBR111W-A	707.217	0.0426245	0.73196			YOR077W		YLR047C
	YDR300C	375.528	-0.156785	0.411351		YDR333C	555.404	-0.959703	5.98187e-10			YCR059C					YBR112C	7228.19	-0.538064	1.41136e-21		YBR112C	7228.19	0.0648625	0.266459			YDR077W		YDR113C
	YDR301W	219.901	-0.335261	0.104633		YDR334W	356.131	0.150158	0.456127			YNR049C					YBR113W	50.9006	-0.351996	0.441862		YBR113W	50.9006	-0.525237	0.212298			YDL115C		YML133C
	YDR302W	1483.82	-0.0897136	0.61352		YDR335W	985.307	-0.0107281	0.952928			YBR007C					YBR114W	1824.35	0.014586	0.880593		YBR114W	1824.35	0.477825	9.74511e-10			YLR254C		YFL060C
	YDR303C	474.429	-0.482392	0.00242957		YDR336W	164.492	-0.469659	0.0529248			YIL007C					YBR115C	10002.1	0.0962421	0.0422789		YBR115C	10002.1	-0.271286	1.16158e-09			YML107C		YIL072W
	YDR304C	3393	-0.62298	1.50533e-07		YDR337W	1191.5	-0.074373	0.646072			YDR351W					YBR116C	170.251	0.175609	0.520269		YBR116C	170.251	-0.200648	0.431287			YNL334C		YIR009W
	YDR305C	124.146	0.0846345	0.771776		YDR338C	275.58	-0.077751	0.741186			YDR076W					YBR117C	714.425	0.581927	2.56991e-05		YBR117C	714.425	-0.0779497	0.590778			YPR151C		YJR005W
	YDR306C	407.89	0.534352	0.00222386		YDR339C	2665.97	0.0448435	0.77285			YCL055W					YBR118W	42339.1	-0.623398	1.192e-31		YBR118W	42339.1	-1.49634	2.18829e-177			YBR175W		YDR034C
	YDR307W	478.008	-0.157292	0.374166		YDR341C	3082.24	0.133939	0.366828			YJL126W					YBR119W	892.221	0.143408	0.209024		YBR119W	892.221	0.717786	8.27938e-13			YHR150W		YDL079C
	YDR308C	408.823	-0.0313239	0.870207		YDR342C	210.708	-0.554393	0.024969			YLR345W					YBR120C	842.542	0.0414054	0.742436		YBR120C	842.542	-0.0467434	0.689617			YDL106C		YPR046W
	YDR309C	967.615	1.27087	2.23297e-17		YDR344C	114.529	-0.616116	0.0299438			YER153C					YBR121C	12631.7	-0.561699	5.52245e-32		YBR121C	12631.7	-1.20247	8.29257e-145			YGR075C		YDR462W
	YDR310C	144.141	-1.12379	2.83121e-06		YDR345C	777.271	1.3878	9.96045e-21			YDR171W					YBR121C-A	984.761	-0.580719	3.84609e-10		YBR121C-A	984.761	-1.21251	2.18337e-42			YBR167C		YPR002W
	YDR311W	215.607	0.367873	0.0869639		YDR346C	1680.26	0.582012	3.93995e-06			YAL014C					YBR122C	2365.64	0.00593877	0.946355		YBR122C	2365.64	-0.195358	0.0080062			YGR223C		YNL254C
	YDR312W	405.571	-0.492403	0.00300063		YDR347W	1432.96	0.183835	0.205734			YNL124W					YBR123C	1441.45	0.0344954	0.734254		YBR123C	1441.45	0.450122	1.29127e-07			YOR289W		YLR177W
	YDR313C	53.6566	0.919543	0.0137854		YDR348C	527.383	0.405705	0.0131975			YGR149W					YBR124W	29.1779	4.6603	3.83361e-09		YBR124W	29.1779	1.98885	0.0154661			YCR026C		YJL185C
	YDR314C	205.791	0.591111	0.00455014		YDR349C	1530.39	-0.144569	0.33952			YDL224C					YBR125C	2488.79	-0.207512	0.00559881		YBR125C	2488.79	0.289613	3.80882e-05			YMR164C		YOR213C
	YDR315C	344.499	0.301245	0.0949376		YDR350C	692.602	-0.464988	0.00237686			YCR035C					YBR126C	8290.77	0.391869	2.49499e-14		YBR126C	8290.77	-0.135534	0.00907315			YOL017W		YLR085C
	YDR316W	431.24	0.0397319	0.830695		YDR351W	475.346	-0.238863	0.254603			YCR067C					YBR126W-A	1949.6	-0.336296	6.04098e-06		YBR126W-A	1949.6	-1.36944	5.91017e-81			YKL017C		YML099C
	YDR316W-A	289.386	-1.35536	8.85773e-14		YDR352W	1189.43	0.660809	5.5645e-07			YBR047W					YBR126W-B	1904.35	-0.344256	3.08723e-06		YBR126W-B	1904.35	-1.37588	9.09106e-83			YOR060C		YOR352W
	YDR317W	64.1849	-0.799343	0.0177603		YDR353W	3864.1	0.0978601	0.489895			YPL022W					YBR127C	13310.9	-0.722009	8.92017e-47		YBR127C	13310.9	-1.20749	2.0988e-131			YPL277C		YOR279C
	YDR318W	244.913	0.924585	6.26615e-06		YDR354W	1678.07	-0.588191	5.29122e-06			YOR114W					YBR128C	326.129	0.0251187	0.900683		YBR128C	326.129	0.980966	2.35656e-10			YNL305C		YML076C
	YDR319C	1535.09	1.15745	2.45403e-18		YDR356W	269.5	0.0723324	0.760433			YKL065C					YBR129C	1603.57	0.322687	7.90812e-05		YBR129C	1603.57	0.433206	2.32785e-08			YPL149W		YGL013C
	YDR320C	329.524	0.490275	0.00575783		YDR357C	557.002	0.184077	0.344934			YPL188W					YBR130C	2449.3	-0.235709	0.00148984		YBR130C	2449.3	0.131241	0.0678247			YER015W		YJL006C
	YDR320C-A	1345.14	-0.366984	0.0140251		YDR358W	133.703	-0.421948	0.116079			YCR004C					YBR131W	1466.61	-0.0129567	0.893975		YBR131W	1466.61	0.920258	1.45081e-33			YLL041C		YFL042C
	YDR320W-B	231.003	1.46339	3.81823e-13		YDR359C	315.16	0.196541	0.338179			YOL089C					YBR132C	2657.6	1.00089	1.08415e-46		YBR132C	2657.6	0.647223	3.15155e-21			YOR350C		YOR044W
	YDR321W	1838.3	-0.599158	2.18841e-06		YDR361C	905.66	-0.00818903	0.962822			YDR357C					YBR133C	5278.18	-0.037606	0.538734		YBR133C	5278.18	0.256189	1.89062e-06			YNL282W		YNR010W
	YDR322C-A	4076.02	-0.440848	0.000171474		YDR362C	155.59	-0.360344	0.170437			YDR358W					YBR134W	23.0233	0.768361	0.257485		YBR134W	23.0233	0.587524	0.366027			YLR092W		YDR479C
	YDR322W	759.841	0.156682	0.323081		YDR363W	151.226	-2.55211	4.3326e-22			YMR111C					YBR135W	2379.45	0.0527767	0.470165		YBR135W	2379.45	-0.421108	6.85726e-11			YJL107C		YLR144C
	YDR323C	80.8381	0.726919	0.0199455		YDR363W-A	3243.75	0.135901	0.363391			YLR165C					YBR136W	3912.11	-0.287036	6.48211e-06		YBR136W	3912.11	0.219678	0.000339585			YIL113W		YER180C-A
	YDR324C	716.932	-0.720862	5.11369e-07		YDR364C	511.411	-0.683724	2.0653e-05			YML068W					YBR137W	1399.59	-0.323486	0.000149905		YBR137W	1399.59	-0.70849	1.10991e-18			YNL116W		YJL083W
	YDR325W	257.477	-0.266447	0.18303		YDR365C	1072.56	0.932149	5.35418e-09			YJL100W					YBR138C	1581.52	0.80843	4.59459e-21		YBR138C	1581.52	1.48591	1.47133e-74			YOR054C		YGR223C
	YDR326C	597.798	-0.736723	1.54469e-05		YDR367W	2430.79	0.337057	0.0767281			YDL209C					YBR139W	7630.23	0.397598	2.38023e-16		YBR139W	7630.23	-0.229265	1.90784e-06			YOR152C		YHR166C
	YDR328C	2250.16	0.12399	0.372836		YDR368W	1321.01	0.103874	0.521565			YMR168C					YBR141C	842.68	-0.438626	7.00436e-05		YBR141C	842.68	0.0987115	0.369416			YIL106W		YEL020C
	YDR329C	324.12	-0.222426	0.23434		YDR369C	137.918	-0.690987	0.0070935			YDR350C					YBR141W-A	104.511	2.8007	1.27134e-19		YBR141W-A	104.511	1.78042	8.08485e-09			YOL108C		YKL134C
	YDR330W	169.004	-0.343872	0.133319		YDR370C	360.582	-0.66245	0.000460257			YER035W					YBR142W	4643.22	-0.623931	6.91335e-29		YBR142W	4643.22	-0.607554	2.99308e-29			YJL057C		YHR178W
	YDR331W	562.983	-0.151194	0.359054		YDR371W	281.233	-0.327385	0.110419			YML016C					YBR143C	8893.14	-0.471609	2.83531e-23		YBR143C	8893.14	-0.757801	2.66622e-60			YBR077C		YDR181C
	YDR332W	75.5687	0.0950812	0.781064		YDR372C	1863.89	-0.0658888	0.684215			YCR053W					YBR144C	23.0194	-0.91935	0.12967		YBR144C	23.0194	-2.6578	7.91748e-06			YGR247W		YPR045C
	YDR333C	498.587	0.699218	3.03232e-05		YDR373W	2481.38	-0.0593952	0.756419			YPL099C					YBR145W	1428.71	0.89641	9.85077e-26		YBR145W	1428.71	0.45512	7.30911e-08			YDL113C		YMR232W
	YDR334W	317.067	-0.55695	0.00165899		YDR374W-A	391.804	0.0443246	0.855189			YPL003W					YBR146W	3419.48	-0.485059	9.21497e-15		YBR146W	3419.48	-0.481818	1.25215e-15			YGR006W		YOR264W
	YDR335W	941.334	-0.146197	0.332732		YDR375C	620.319	-0.16672	0.366968			YNR023W					YBR147W	411.06	2.11676	6.30848e-37		YBR147W	411.06	1.55606	2.77695e-21			YLL046C		YLR383W
	YDR336W	126.03	-0.297342	0.291786		YDR376W	269.634	0.121086	0.605548			YDR469W					YBR148W	213.938	-0.336212	0.111106		YBR148W	213.938	0.123845	0.538836			YPL213W		YNL275W
	YDR337W	954.445	-0.662145	1.31826e-06		YDR377W	10669.3	-0.0430914	0.768268			YBR188C					YBR149W	5393.57	0.477324	2.48977e-17		YBR149W	5393.57	-0.574466	7.7021e-25			YDR379W		YHR156C
	YDR338C	272.396	0.0235825	0.917383		YDR378C	2445.03	0.652115	6.78244e-06			YDR485C					YBR150C	1965.63	0.171727	0.0360937		YBR150C	1965.63	1.22411	5.23071e-64			YHR097C		YLR014C
	YDR339C	3003.09	0.265077	0.0308726		YDR379C-A	449.966	-1.38817	2.11409e-17			YDR404C					YBR151W	4618.77	-0.524165	1.9013e-21		YBR151W	4618.77	-0.785474	2.96022e-49			YJL119C		YOL137W
	YDR341C	2651.66	-0.662501	4.62091e-08		YDR379W	111.869	-0.211984	0.507448			YBR193C					YBR152W	662.392	0.230238	0.0598795		YBR152W	662.392	1.09893	4.54339e-24			YGL212W		YML114C
	YDR342C	316.572	1.4196	2.73944e-11		YDR380W	290.016	-1.83988	1.37917e-17			YEL012W					YBR153W	1200.08	0.340421	0.000182123		YBR153W	1200.08	0.80459	2.134e-21			YGL134W		YLR467W
	YDR344C	118.539	0.680613	0.0106507		YDR381C-A	676.451	-0.584986	0.000507697			YLL041C					YBR154C	3464.52	-0.399134	4.57433e-09		YBR154C	3464.52	-0.54531	9.71862e-17			YBR262C		YDL003W
	YDR345C	697.274	-2.11612	2.39287e-41		YDR381W	5640.18	0.341551	0.00515516			YGL194C					YBR155W	1757.82	-0.890512	1.14808e-22		YBR155W	1757.82	-0.871851	2.28944e-23			YPL152W		YDL005C
	YDR346C	1444.39	-1.24128	2.81617e-23		YDR382W	46238.5	1.03778	2.35291e-10			YLR423C					YBR156C	1568.78	0.413422	2.48881e-06		YBR156C	1568.78	0.992445	1.76507e-33			YOR037W		YDL127W
	YDR347W	1273.1	-0.603972	4.59876e-06		YDR383C	196.018	-0.348089	0.136761			YOR059C					YBR157C	1485.27	-0.668012	2.51125e-14		YBR157C	1485.27	-0.0676453	0.444823			YIL071C		YOR353C
	YDR348C	577.682	-0.139412	0.393116		YDR384C	750.803	0.408123	0.00644766			YJL059W					YBR158W	10175.8	-0.188809	8.78379e-05		YBR158W	10175.8	0.0276029	0.586479			YGL096W		YPR021C
	YDR349C	1764.91	0.494927	0.000137884		YDR385W	17049.8	0.505653	3.4314e-05			YNL148C					YBR159W	3125.03	-0.709734	2.79459e-27		YBR159W	3125.03	-0.813502	7.09424e-38			YCR065W		YOR193W
	YDR350C	800.764	0.791948	1.49519e-08		YDR386W	46.3216	0.0574952	0.908018			YLR387C					YBR160W	2779.83	0.143156	0.0741472		YBR160W	2779.83	0.272499	0.000263911			YDL025C		YNL293W
	YDR351W	603.97	0.807289	6.7049e-05		YDR387C	200.91	-0.197795	0.415369			YLR094C					YBR161W	1569.6	0.26403	0.001306		YBR161W	1569.6	0.762187	8.1648e-24			YMR041C		YIL013C
	YDR352W	1380.55	-0.183485	0.182122		YDR388W	1349.42	0.0309676	0.853631			YML023C					YBR162C	15392.5	-0.892755	1.15232e-47		YBR162C	15392.5	-1.50217	1.28818e-134			YPL151C		YPR203W
	YDR353W	3709.98	-0.245929	0.0457506		YDR389W	720.667	-0.204141	0.209857			YMR144W					YBR162W-A	2197.31	-0.224411	0.00232931		YBR162W-A	2197.31	-0.951904	2.4102e-42			YNL205C		YDL169C
	YDR354W	1767.14	0.692517	2.58278e-07		YDR390C	402.442	0.021896	0.917664			YDR369C					YBR163W	1661.57	0.250026	0.00165494		YBR163W	1661.57	0.81809	8.00788e-29			YCL002C		YPL103C
	YDR356W	236.577	-0.51482	0.00933575		YDR391C	1305.32	-0.650842	5.78747e-06			YEL023C					YBR164C	2065.84	-0.281215	0.000816568		YBR164C	2065.84	-0.886409	1.46039e-28			YDR031W		YDR013W
	YDR357C	816.165	0.795462	3.60088e-07		YDR392W	224.142	-0.305128	0.208729			YOR119C					YBR165W	1881.39	0.361446	6.24402e-06		YBR165W	1881.39	1.15583	2.31107e-54			YFR005C		YLR091W
	YDR358W	157.588	0.79545	0.000697566		YDR393W	375.766	-0.243778	0.20782			YOR226C					YBR166C	2935.32	0.171619	0.0222569		YBR166C	2935.32	0.109565	0.136369			YER109C		YDR257C
	YDR359C	402.349	0.45725	0.00664673		YDR394W	957.111	-0.0282198	0.879942			YLR133W					YBR167C	768.446	0.691785	1.17952e-09		YBR167C	768.446	0.705137	9.71081e-11			YNL086W		YFR022W
	YDR361C	843.322	-0.228876	0.123189		YDR395W	1039.84	0.169332	0.307075			YDR260C					YBR168W	1366.19	0.351504	2.2917e-05		YBR168W	1366.19	0.838999	2.32632e-27			YJL162C		YGR092W
	YDR362C	141.75	0.0916339	0.728661		YDR397C	2438.14	0.0230382	0.889867			YER026C					YBR169C	2645.3	0.792598	4.50477e-30		YBR169C	2645.3	-0.0687059	0.355621			YDR236C		YMR287C
	YDR363W	162.346	2.65867	3.17962e-23		YDR398W	880.175	0.0759979	0.683001			YJL024C					YBR170C	2474.82	0.0075836	0.934634		YBR170C	2474.82	0.644601	7.11699e-19			YLR201C		YGR042W
	YDR363W-A	3510.71	0.0721023	0.636944		YDR399W	7985.72	-1.27512	8.8189e-30			YLR414C					YBR171W	2799.56	-0.671934	5.99812e-26		YBR171W	2799.56	-0.817903	6.25172e-41			YLR462W		YIL102C-A
	YDR364C	483.782	0.532891	0.00077288		YDR400W	1069.46	0.401677	0.00417654			YBR198C					YBR172C	5641.04	-0.206286	0.0011828		YBR172C	5641.04	0.493738	2.00123e-16			YAL060W		YAL051W
	YDR365C	1054.92	-1.03719	9.10805e-11		YDR404C	4420.72	-0.104797	0.441676			YDR073W					YBR173C	4158.83	-0.0408846	0.513204		YBR173C	4158.83	-0.298507	5.29522e-08			YPL233W		YDR315C
	YDR367W	2480.86	-0.294269	0.100248		YDR405W	241.169	-0.166394	0.475791			YMR319C					YBR174C	18.0349	0.476483	0.518453		YBR174C	18.0349	0.876436	0.190541			YHR161C		YEL077C
	YDR368W	1067.29	-0.86794	1.34447e-09		YDR406W	18.1792	7.87014	1.58517e-06			YOL155C					YBR175W	2480.89	0.692979	3.50476e-24		YBR175W	2480.89	0.660278	2.60323e-23			YJR159W		YBR175W
	YDR369C	143.769	0.768939	0.00192581		YDR407C	670.405	-0.247919	0.137437			YDR011W					YBR176W	917.707	-0.108772	0.323323		YBR176W	917.707	0.387654	5.38839e-05			YDR336W		YCR107W
	YDR370C	375.7	0.740095	3.55074e-05		YDR408C	2100.4	-1.18481	3.87474e-22			YIL026C					YBR177C	4704.6	-0.1385	0.0210565		YBR177C	4704.6	-0.315267	1.98366e-08			YBL019W		YPL100W
	YDR371W	328.998	0.694281	9.05831e-05		YDR409W	85.0231	0.165374	0.654706			YDR381C-A					YBR178W	21.9384	0.451193	0.506912		YBR178W	21.9384	-0.280727	0.671993			YPL216W		YDR489W
	YDR372C	1747.72	-0.14447	0.367669		YDR410C	1345.53	0.322098	0.121954			YBR175W					YBR179C	2534.83	0.0315513	0.706562		YBR179C	2534.83	0.430234	1.07655e-09			YNL329C		YLL004W
	YDR373W	2852.17	0.411596	0.0085914		YDR411C	562.199	0.177756	0.317275			YPL135W					YBR180W	63.637	0.570914	0.148985		YBR180W	63.637	0.728174	0.0467341			YGL223C		YDL194W
	YDR374W-A	496.683	0.5642	0.00578		YDR412W	1336.55	0.53277	9.14512e-05			YDL177C					YBR181C	5567.24	-0.778463	8.83923e-38		YBR181C	5567.24	-1.35831	8.01741e-116			YPR071W		YMR137C
	YDR375C	575.005	-0.0696487	0.680588		YDR414C	670.239	0.230228	0.177098			YLR055C					YBR182C	1083.94	-0.172129	0.12242		YBR182C	1083.94	0.751989	7.23888e-15			YKL202W		YOR300W
	YDR376W	283.938	0.0075067	0.971846		YDR415C	38.3368	0.360391	0.4734			YCL031C					YBR182C-A	50.465	-0.783548	0.0439478		YBR182C-A	50.465	-1.66347	5.46328e-06			YDR479C		YLL054C
	YDR377W	9816.98	-0.22742	0.0589577		YDR416W	242.902	-0.0190216	0.939886			YGR056W					YBR183W	2729.45	0.6126	7.90784e-18		YBR183W	2729.45	-0.0786429	0.294868			YDR318W		YJR100C
	YDR378C	2445.2	-0.679428	3.809e-05		YDR418W	71353.3	0.578993	3.00409e-06			YIR032C					YBR184W	501.063	1.34508	1.78017e-21		YBR184W	501.063	1.64858	8.98874e-34			YCR046C		YJL118W
	YDR379C-A	595.888	1.90856	7.27455e-34		YDR419W	119.777	-0.463583	0.118565			YGL066W					YBR185C	1673.81	0.125193	0.12616		YBR185C	1673.81	0.131986	0.085831			YDR381C-A		YDR003W-A
	YDR379W	169.07	1.16131	2.55719e-07		YDR420W	466.465	0.402165	0.0188584			YDL211C					YBR186W	83.8241	0.137988	0.742841		YBR186W	83.8241	0.870812	0.0111597			YBR230W-A		YBR008C
	YDR380W	281.911	1.77253	7.43927e-16		YDR421W	107.128	-0.940085	0.000807107			YKL167C					YBR187W	4226.86	-0.760262	2.64633e-36		YBR187W	4226.86	-0.89934	2.70999e-53			YLR306W		YER064C
	YDR381C-A	731.816	0.752136	7.14826e-06		YDR422C	677.628	-0.865112	5.1278e-09			YGL247W					YBR188C	790.171	0.608741	3.03774e-08		YBR188C	790.171	0.156196	0.16211			YJR127C		YOR147W
	YDR381W	6747.84	0.168767	0.169633		YDR423C	288.308	-0.0481708	0.836867			YBR055C					YBR189W	11092.9	-0.644085	3.389e-33		YBR189W	11092.9	-1.37592	3.02953e-149			YBL091C-A		YLR095C
	YDR382W	38826.8	-2.05987	7.69066e-30		YDR424C	1056.08	1.13766	3.90669e-10			YDR508C					YBR190W	666.225	-0.502113	5.33584e-06		YBR190W	666.225	-1.09926	1.25291e-25			YFL066C		YMR160W
	YDR383C	224.491	0.662431	0.00139362		YDR425W	182.554	0.375491	0.110419			YDR405W					YBR191W	8752.04	-0.622821	1.08207e-33		YBR191W	8752.04	-1.25547	4.55931e-136			YHR044C		YER051W
	YDR384C	1873.1	1.74086	7.94002e-46		YDR427W	1489.13	0.174534	0.222719			YBR081C					YBR191W-A	465.272	-0.67347	6.42098e-07		YBR191W-A	465.272	-1.00974	3.04298e-15			YOR205C		YLR392C
	YDR385W	14842	-1.0822	5.85577e-23		YDR428C	692.405	0.910193	3.87956e-07			YDR370C					YBR192W	1412.36	-0.549436	2.92337e-08		YBR192W	1412.36	0.0144863	0.893361			YIL162W		YLR425W
	YDR386W	23.7849	-8.27171	1.45571e-07		YDR429C	2240.41	0.0947871	0.557972			YGL175C					YBR193C	1245.1	0.385516	1.76796e-05		YBR193C	1245.1	0.368941	1.78753e-05			YER087C-A		YHR017W
	YDR387C	221.032	0.426638	0.0451973		YDR430C	580.612	0.100134	0.58991			YLR205C					YBR194W	739.618	0.77788	8.47356e-12		YBR194W	739.618	0.0598878	0.627042			YML099C		YCR081W
	YDR388W	1385.92	0.0241193	0.873285		YDR432W	1074.07	0.458658	0.313032			YLR104W					YBR195C	1214.94	-0.174015	0.0690459		YBR195C	1214.94	0.552506	1.08205e-10			YIR023W		YPL151C
	YDR389W	722.648	0.190691	0.213014		YDR434W	830.957	0.53682	0.000169517			YGL036W					YBR196C	29714.3	-0.397105	4.10177e-18		YBR196C	29714.3	-1.46209	9.68944e-231			YCR105W		YGL247W
	YDR390C	386.077	-0.169162	0.347626		YDR435C	635.198	-1.0528	4.75361e-12			YOR018W					YBR196C-A	61.4804	-0.450525	0.228692		YBR196C-A	61.4804	-0.316486	0.371403			YOR357C		YBR007C
	YDR391C	2028.84	1.56823	1.79581e-34		YDR436W	182.364	0.0649858	0.813752			YBR005W					YBR196C-B	102.128	-0.194109	0.518399		YBR196C-B	102.128	-0.068188	0.814215			YGL037C		YLR097C
	YDR392W	268.503	0.727094	0.000131458		YDR437W	401.52	-0.312567	0.0952829			YGL085W					YBR197C	1221.89	0.606082	1.79662e-11		YBR197C	1221.89	0.750567	4.46637e-18			YGL079W		YIL122W
	YDR393W	305.963	-0.38628	0.0461824		YDR438W	61.1374	-1.2608	0.00046602			YGL028C					YBR198C	3183.73	-0.0740851	0.322522		YBR198C	3183.73	0.152543	0.0253273			YDR013W		YGL250W
	YDR394W	894.28	-0.196188	0.241777		YDR439W	278.521	-0.0152002	0.950633			YOL100W					YBR199W	5126.46	-0.131745	0.0125223		YBR199W	5126.46	-0.225262	5.56685e-06			YPL247C		YHR134W
	YDR395W	844.213	-0.937158	2.78672e-11		YDR440W	315.31	0.188852	0.38156			YPL193W					YBR200W	2597.51	0.0419288	0.585783		YBR200W	2597.51	0.00522494	0.946962			YBR253W		YMR001C
	YDR397C	2587.66	0.123762	0.351218		YDR441C	2695.04	0.181593	0.193691			YIL009C-A					YBR200W-A	2.10185	1.16093	0.711894		YBR200W-A	2.10185	-0.0438782	0.988833			YOR297C		YBR132C
	YDR398W	959.736	0.149309	0.339592		YDR443C	230.519	-0.187796	0.417101			YDR160W					YBR201W	1089.85	-0.491584	1.07805e-06		YBR201W	1089.85	-0.120139	0.225847			YBR278W		YIL119C
	YDR399W	5591.56	0.461114	6.79861e-05		YDR444W	400.371	-0.014568	0.94572			YNL103W					YBR201C-A	793.179	0.611501	4.35376e-07		YBR201C-A	793.179	-0.460519	0.000130602			YCR051W		YJR011C
	YDR400W	1065.77	-0.439175	0.00157471		YDR445C	137.194	0.912964	0.000273045			YML095C					YBR202W	5170.16	-0.273087	1.34262e-05		YBR202W	5170.16	0.219929	0.000297196			YNL162W-A		YDR498C
	YDR404C	5831.17	0.779743	3.697e-12		YDR447C	31479.9	0.312607	0.0116404			YER100W					YBR203W	2958.04	0.508624	5.58878e-15		YBR203W	2958.04	1.01109	2.36699e-60			YMR040W		YGL154C
	YDR405W	306.242	0.742762	6.30624e-05		YDR448W	224.845	0.0567626	0.825192			YIL011W					YBR204C	1202	0.301102	0.0010873		YBR204C	1202	0.175436	0.0503642			YHR159W		YPR186C
	YDR406W	38.8404	0.162972	0.73309		YDR449C	1280.52	0.184709	0.216165			YJL025W					YBR205W	3555.21	-0.782091	1.10072e-39		YBR205W	3555.21	-0.998143	5.55249e-68			YGL194C-A		YBR170C
	YDR407C	617.601	9.02596e-05	0.999643		YDR450W	22256.5	0.530837	0.000437135			YML099C					YBR206W	1299.02	-0.885394	9.02191e-26		YBR206W	1299.02	-1.15437	1.28205e-46			YJL013C		YMR201C
	YDR408C	1518	0.430423	0.000694068		YDR451C	481.739	-0.391455	0.0233376			YBR105C					YBR207W	4234.34	0.194675	0.00177212		YBR207W	4234.34	0.164522	0.00649933			YHL050C		YMR028W
	YDR409W	106.163	0.424456	0.142018		YDR452W	1215.25	-0.19009	0.220541			YBR149W					YBR208C	8344.11	0.00487088	0.944284		YBR208C	8344.11	0.23056	6.073e-05			YKL159C		YKL042W
	YDR410C	1327.04	-0.391213	0.0537795		YDR453C	60.0542	-0.662004	0.0770242			YCR017C					YBR209W	13.0188	0.723348	0.399538		YBR209W	13.0188	0.585184	0.473606			YPL123C		YPL002C
	YDR411C	669.901	0.296875	0.0496814		YDR454C	8305.64	0.61485	1.76159e-06			YLR131C					YBR210W	1432.4	0.12943	0.140591		YBR210W	1432.4	-0.539441	2.21787e-11			YFR046C		YDL115C
	YDR412W	1197.66	-0.989068	2.10152e-13		YDR456W	1665.37	-0.216841	0.208739			YGR092W					YBR211C	1316.74	0.240277	0.012108		YBR211C	1316.74	1.16234	2.82892e-41			YLL039C		YNL118C
	YDR414C	561.745	-0.886334	4.98268e-09		YDR457W	555.176	-0.00899375	0.963741			YDR435C					YBR212W	6341.24	0.345092	1.35146e-10		YBR212W	6341.24	-0.113292	0.0375791			YEL077C		YDR227W
	YDR415C	38.5463	-0.36556	0.423963		YDR458C	561.537	-0.250923	0.148171			YDR392W					YBR213W	616.237	-0.332201	0.0126449		YBR213W	616.237	0.26813	0.0318799			YDR246W-A		YKR027W
	YDR416W	202.01	-0.595642	0.00410046		YDR459C	300.87	-1.06916	1.22023e-08			YDR323C					YBR214W	5307.29	0.82372	4.86925e-38		YBR214W	5307.29	0.121076	0.0673937			YPL222W		YGR122W
	YDR418W	64103.1	-1.03298	2.05675e-16		YDR460W	176.817	-0.209058	0.42782			YAL031C					YBR215W	1854.94	0.0928808	0.297641		YBR215W	1854.94	0.469709	2.4401e-09			YDR380W		YOR313C
	YDR419W	107.923	0.172891	0.578673		YDR461C-A	112.573	0.55649	0.0468799			YOL133W					YBR216C	2276.89	0.391105	9.50501e-09		YBR216C	2276.89	0.824205	2.47836e-37			YDL044C		YGR058W
	YDR420W	484.114	-0.304612	0.0679792		YDR461W	2847.58	1.73815	6.41646e-51			YGL248W					YBR217W	726.634	1.23799	1.42704e-25		YBR217W	726.634	1.10161	1.81175e-21			YCR059C		YGR036C
	YDR421W	56.9873	-0.894061	0.0164534		YDR462W	917.097	-0.447438	0.00310055			YOR284W					YBR218C	11255.4	-0.458543	1.68314e-18		YBR218C	11255.4	-0.815938	4.22399e-57			YMR278W		YKL132C
	YDR422C	479.799	-0.025269	0.894688		YDR463W	651.903	-0.0692034	0.709548			YMR278W					YBR219C	593.155	-0.872322	1.40081e-11		YBR219C	593.155	-0.563463	4.39011e-06			YGR019W		YDR067C
	YDR423C	314.451	0.264546	0.15703		YDR465C	833.713	0.450282	0.00248998			YJL013C					YBR220C	2454.77	-0.736811	6.62393e-23		YBR220C	2454.77	-0.36127	6.37279e-07			YBL043W		YOR058C
	YDR424C	1002.05	-1.43486	3.0241e-14		YDR466W	145.288	-0.00136245	0.997992			YNL158W					YBR221C	9143.39	-0.415958	7.25376e-15		YBR221C	9143.39	-1.39723	2.69806e-156			YDR073W		YCL056C
	YDR425W	161.541	-0.849199	0.000153851		YDR468C	807.067	0.0989704	0.564251			YOR044W					YBR221W-A	3.6866	0.676578	0.733997		YBR221W-A	3.6866	-0.194029	0.921749			YOR305W		YDR406W
	YDR427W	1381.11	-0.442307	0.000612386		YDR469W	910.537	-0.489312	0.000629424			YMR164C					YBR222C	5732.35	0.0890055	0.197399		YBR222C	5732.35	-0.525375	9.30067e-17			YER035W		YPR104C
	YDR428C	628.484	-1.39464	9.89549e-15		YDR470C	429.868	-0.310658	0.0864329			YGL037C					YBR223C	1319.27	1.12152	2.49602e-37		YBR223C	1319.27	1.41648	9.5068e-63			YPR199C		YCR032W
	YDR429C	2055.78	-0.39018	0.00596718		YDR471W	40694.9	0.186806	0.126745			YOL082W					YBR224W	254.475	0.603637	0.00223271		YBR224W	254.475	1.42694	2.10743e-15			YMR140W		YDL001W
	YDR430C	526.729	-0.433646	0.00513215		YDR472W	1393.23	-0.0230442	0.890232			YJL005W					YBR225W	3296.71	0.176871	0.00924256		YBR225W	3296.71	0.919327	1.79493e-49			YKL045W		YOL067C
	YDR432W	945.847	-0.975392	1.67341e-06		YDR473C	161.783	-0.310209	0.244761			YER084W-A					YBR226C	30.4524	-0.332892	0.574127		YBR226C	30.4524	-0.131058	0.815895			YDR003W-A		YPR178W
	YDR434W	957.636	-0.101358	0.496583		YDR475C	173.167	0.342036	0.163854			YOR337W					YBR227C	1470.67	0.0190677	0.844531		YBR227C	1470.67	0.329689	3.75137e-05			YPL095C		YCR065W
	YDR435C	552.775	0.727257	1.65651e-06		YDR476C	1101.5	0.220803	0.148143			YHR118C					YBR228W	854.454	0.819629	2.75985e-15		YBR228W	854.454	0.994152	1.80296e-23			YLR047C		YDL069C
	YDR436W	194.183	0.0942282	0.707201		YDR477W	663.007	0.596002	0.00011035			YLR424W					YBR229C	4795.72	-0.426614	2.61674e-14		YBR229C	4795.72	-0.526828	2.69061e-22			YMR293C		YPL277C
	YDR437W	618.547	1.27901	2.23244e-16		YDR478W	348.262	0.137149	0.502969			YML005W					YBR230C	3085.1	0.191454	0.00337261		YBR230C	3085.1	-0.551136	6.77754e-19			YLR177W		YGL256W
	YDR438W	89.8523	1.98439	1.84992e-10		YDR479C	217.525	-0.781959	0.000211998			YLR091W					YBR230W-A	618.048	0.650963	4.17933e-07		YBR230W-A	618.048	-0.838146	7.1176e-11			YOR127W		YCR073C
	YDR439W	280.687	0.0153257	0.951238		YDR480W	194.008	-0.54777	0.015462			YLR019W					YBR231C	543.491	-0.386191	0.0301693		YBR231C	543.491	0.340791	0.0401764			YKL061W		YBR233W
	YDR440W	295.955	-0.418122	0.0329927		YDR481C	1152.27	0.862589	4.19623e-11			YDR014W					YBR232C	9.64786	0.720314	0.486175		YBR232C	9.64786	0.476878	0.631805			YOR114W		YMR185W
	YDR441C	2347.13	-0.674579	6.08931e-08		YDR482C	275.977	0.0562793	0.819443			YGR104C					YBR233W	1784.26	0.0530625	0.567232		YBR233W	1784.26	0.631019	1.11158e-15			YBR183W		YPL074W
	YDR443C	233.569	0.202703	0.333949		YDR483W	3747.45	0.0171259	0.913799			YDR181C					YBR233W-A	978.842	-0.158271	0.196461		YBR233W-A	978.842	-0.425594	0.000147105			YOR066W		YOL069W
	YDR444W	438.615	0.24535	0.151107		YDR484W	248.375	-0.137283	0.554069			YCR048W					YBR234C	5790.15	-0.228207	1.49394e-05		YBR234C	5790.15	-0.916886	1.73708e-73			YDR016C		YDR073W
	YDR445C	147.012	-0.670557	0.00885228		YDR485C	200.596	-0.663932	0.00440772			YGR222W					YBR235W	2747.37	-0.301777	0.0549119		YBR235W	2747.37	-0.236838	0.126416			YBR201C-A		YKR064W
	YDR447C	27062.1	-0.888259	8.34413e-12		YDR486C	695.932	-0.265791	0.0941869			YGR113W					YBR236C	1894.36	-0.0602446	0.443437		YBR236C	1894.36	-0.229194	0.00102351			YPL274W		YFR048W
	YDR448W	442.818	1.50223	1.49381e-19		YDR487C	5345.28	-0.0932151	0.493991			YHL018W					YBR237W	1719.85	0.533263	5.30735e-10		YBR237W	1719.85	0.821038	1.73341e-23			YJL077W-A		YPL088W
	YDR449C	1202.64	-0.411157	0.00220101		YDR488C	174.551	0.345385	0.164032			YDR070C					YBR238C	8834.74	-0.75192	2.83967e-46		YBR238C	8834.74	-0.574642	6.92547e-29			YDR319C		YNR006W
	YDR450W	18680	-1.2866	6.06106e-20		YDR489W	624.482	-0.580793	0.000124931			YCL050C					YBR239C	2641.04	0.196532	0.00462981		YBR239C	2641.04	0.85504	5.88827e-41			YML023C		YMR294W
	YDR451C	696.977	1.21308	3.5529e-13		YDR490C	337.702	-0.476085	0.0103525			YCL017C					YBR240C	472.115	0.111267	0.491634		YBR240C	472.115	1.20696	1.9281e-19			YJL214W		YOL105C
	YDR452W	1103.06	-0.107039	0.462484		YDR492W	2203.54	1.09631	5.05695e-16			YOR215C					YBR241C	2295.19	0.462665	2.55234e-08		YBR241C	2295.19	-0.294097	0.00036029			YBR188C		YKL045W
	YDR453C	91.5305	1.53976	5.34512e-07		YDR493W	970.076	0.157736	0.324307			YOR081C					YBR242W	1976.06	-0.138157	0.0602948		YBR242W	1976.06	-0.292356	1.67721e-05			YHR204W		YPR164W
	YDR454C	7422.72	-1.10048	1.96049e-17		YDR494W	989.077	0.00384724	0.984977			YBR272C					YBR243C	2813.5	-0.64249	1.40484e-19		YBR243C	2813.5	-1.0068	1.35339e-48			YOL009C		YGR222W
	YDR456W	1588.27	0.0652765	0.651647		YDR495C	57.3904	0.044924	0.917664			YHR046C					YBR244W	934.534	0.283932	0.00507413		YBR244W	934.534	0.26166	0.00665434			YBR197C		YJL072C
	YDR457W	476.808	-0.493856	0.00222434		YDR496C	567.83	0.333349	0.0762182			YKR080W					YBR245C	5075.57	-0.562885	1.02518e-22		YBR245C	5075.57	-0.19033	0.00073793			YBR256C		YDL080C
	YDR458C	569.787	0.268847	0.0933166		YDR497C	10838	-0.707724	4.40922e-10			YDR137W					YBR246W	2964.76	0.320964	1.48718e-07		YBR246W	2964.76	0.517732	6.74012e-19			YDR387C		YER137C
	YDR459C	308.714	1.10777	2.94302e-09		YDR498C	209.336	-0.145064	0.555542			YBR030W					YBR247C	3586.26	-0.558368	4.57736e-18		YBR247C	3586.26	-0.527534	2.61765e-17			YCR088W		YOL078W
	YDR460W	159.872	-0.0988495	0.715832		YDR499W	223.64	-1.26006	1.0457e-08			YJR062C					YBR248C	3171.63	0.0427765	0.543488		YBR248C	3171.63	0.0991723	0.121043			YBR224W		YHL006C
	YDR461C-A	127.724	-0.166448	0.538285		YDR500C	12696.4	1.45439	3.913e-05			YKR027W					YBR249C	9200.88	-0.200623	0.000109059		YBR249C	9200.88	-0.88697	7.00527e-71			YHR142W		YMR223W
	YDR461W	2207.52	-14.8048	2.06021e-23		YDR501W	10.5214	-6.59711	0.000113026			YGL163C					YBR250W	223.752	0.603491	0.00487768		YBR250W	223.752	1.57669	7.92146e-16			YBR250W		YJL223C
	YDR462W	1229.86	1.10106	3.15181e-17		YDR502C	1073.61	0.422179	0.00487947			YPL067C					YBR251W	1456.24	0.132161	0.128728		YBR251W	1456.24	0.451409	6.48428e-09			YJR135C		YIL130W
	YDR463W	671.92	0.131975	0.422544		YDR503C	447.951	-0.145284	0.49755			YMR025W					YBR252W	1885.55	-0.366647	4.85499e-07		YBR252W	1885.55	-0.683139	6.82806e-23			YGR278W		YER084W
	YDR465C	887.446	-0.27027	0.0660668		YDR505C	628.311	-0.0787198	0.681308			YBR095C					YBR253W	975.955	0.639101	2.19151e-10		YBR253W	975.955	0.433854	1.03296e-05			YLR036C		YOR324C
	YDR466W	206.63	0.864772	3.89565e-05		YDR506C	56.1191	-0.814786	0.0332234			YDR207C					YBR254C	1464.44	-0.0722147	0.452186		YBR254C	1464.44	0.20768	0.0147562			YPL047W		YHL050C
	YDR468C	771.263	-0.261781	0.0809066		YDR507C	536.411	-0.221157	0.207927			YDL028C					YBR255W	1255.03	0.188314	0.0610832		YBR255W	1255.03	0.735877	4.24403e-16			YGL175C		YCR054C
	YDR469W	1038.68	0.783166	1.23618e-08		YDR508C	1218.11	-0.311831	0.0385329			YNL127W					YBR255C-A	702.573	0.512719	2.98201e-05		YBR255C-A	702.573	0.144499	0.2484			YPL077C		YLR072W
	YDR470C	396.903	0.0745201	0.686785		YDR510W	5450.67	0.608355	8.10197e-07			YGL250W					YBR256C	2863.04	0.604939	1.68515e-20		YBR256C	2863.04	-0.26664	4.46691e-05			YOR126C		YHR195W
	YDR471W	35431.3	-0.682338	4.21577e-09		YDR511W	1048.34	0.043417	0.818973			YPL144W					YBR257W	1004.79	0.0890038	0.403665		YBR257W	1004.79	0.612978	2.12458e-11			YLL033W		YDR309C
	YDR472W	1278.86	-0.257457	0.058399		YDR513W	2425.53	0.321536	0.0884657			YLR093C					YBR258C	799.692	0.416295	0.00115526		YBR258C	799.692	0.418984	0.000636179			YML068W		YNR032W
	YDR473C	170.776	0.428418	0.0596189		YDR514C	223.283	0.142001	0.553527			YGL079W					YBR259W	1437.09	0.303864	0.000249253		YBR259W	1437.09	1.01113	5.94665e-40			YML118W		YMR021C
	YDR475C	160.495	-0.632778	0.00585924		YDR515W	163.195	0.216634	0.409261			YLR320W					YBR260C	2324.02	-0.197741	0.00719034		YBR260C	2324.02	0.21472	0.00191243			YOL082W		YNL027W
	YDR476C	1074.47	-0.324153	0.0196172		YDR516C	1032.06	-0.472578	0.00212805			YKL079W					YBR261C	1832.24	-0.0932986	0.277922		YBR261C	1832.24	-0.444965	8.29751e-09			YLL003W		YBR257W
	YDR477W	660.55	-0.638226	1.75372e-05		YDR517W	1529.83	-0.194992	0.208104			YOR077W					YBR262C	1922.51	0.672922	1.59146e-18		YBR262C	1922.51	0.19287	0.0124311			YDR123C		YOR066W
	YDR478W	386.643	0.142332	0.445968		YDR518W	879.883	0.657945	3.1275e-06			YJR046W					YBR263W	6407.11	-1.88117	3.76789e-252		YBR263W	6407.11	-1.13914	1.15451e-103			YFL060C		YLR210W
	YDR479C	277.645	1.29008	5.49313e-12		YDR519W	3297.05	0.11698	0.815928			YMR136W					YBR264C	791.396	0.17427	0.138178		YBR264C	791.396	-0.136777	0.226837			YDR256C		YDR311W
	YDR480W	247.813	1.08329	4.38468e-08		YDR520C	61.0969	0.261897	0.519211			YDR333C					YBR265W	3022.43	0.13537	0.0467706		YBR265W	3022.43	-0.0965736	0.145313			YDR252W		YOR093C
	YDR481C	1007.37	-1.53616	2.36449e-31		YDR524C	1456.94	-0.357005	0.00784297			YPL168W					YBR267W	3122.28	-0.674653	1.08635e-26		YBR267W	3122.28	-0.409831	1.32093e-11			YDR179C		YKR022C
	YDR482C	252.303	-0.359083	0.0900636		YDR524C-B	90619.6	0.440585	0.346283			YIL049W					YBR266C	8.51162	0.480672	0.665818		YBR266C	8.51162	-1.13864	0.284658			YGR050C		YCL010C
	YDR483W	2797.08	-1.08143	1.19218e-17		YDR525W-A	4830.89	-0.720017	1.01929e-05			YBR239C					YBR268W	1695.47	-0.18285	0.0261615		YBR268W	1695.47	-0.599835	3.67425e-15			YDR069C		YGL240W
	YDR484W	252.441	0.160718	0.440047		YDR527W	332.988	0.72421	0.000135997			YHR071W					YBR269C	1676.81	0.775142	5.69477e-18		YBR269C	1676.81	-0.060148	0.536109			YPR082C		YBR083W
	YDR485C	212.706	0.781331	0.000633677		YDR528W	659.327	-0.57592	0.000126323			YGR136W					YBR270C	948.326	1.5131	9.72878e-50		YBR270C	948.326	1.72234	1.07733e-67			YDL057W		YDL024C
	YDR486C	626.223	-0.0489361	0.768317		YDR529C	7270.12	-0.0215832	0.883054			YGL162W					YBR271W	1207.5	-0.531469	4.61103e-10		YBR271W	1207.5	-0.176578	0.0321666			YPL241C		YJR062C
	YDR487C	4536.95	-0.432563	0.000172484		YDR530C	293.838	-0.823536	8.1734e-05			YPL206C					YBR272C	1543.92	0.223967	0.0161725		YBR272C	1543.92	0.39075	7.21901e-06			YKR102W		YOL011W
	YDR488C	164.226	-0.582072	0.00989154		YDR531W	781.903	0.190848	0.246488			YKL124W					YBR273C	1947.55	-0.352665	8.94534e-06		YBR273C	1947.55	0.0223951	0.786495			YNL249C		YNL068C
	YDR489W	622.71	0.555424	0.000192683		YDR532C	415.453	-0.744588	2.31661e-05			YDR371W					YBR274W	1721.44	0.0946814	0.259937		YBR274W	1721.44	0.0725873	0.369596			YCL044C		YDL117W
	YDR490C	441.958	1.07466	3.46025e-11		YDR533C	721.921	2.17991	1.24905e-51			YLL039C					YBR275C	3865.79	-0.498037	4.07173e-16		YBR275C	3865.79	0.478112	1.36852e-16			YJR062C		YDR146C
	YDR492W	2263.05	-1.01219	2.56435e-16		YDR536W	17.4209	-7.32198	9.14228e-06			YMR273C					YBR276C	2799.19	-0.442396	7.32081e-10		YBR276C	2799.19	-0.521287	5.66235e-14			YDR100W		YAL024C
	YDR493W	1114.42	0.216326	0.119212		YDR538W	1473.48	-0.286243	0.0653172			YDR227W					YBR277C	24.2036	1.42828	0.0399369		YBR277C	24.2036	1.92782	0.00301901			YHR198C		YNL008C
	YDR494W	1020.22	0.0622882	0.719242		YDR539W	321.633	0.987284	3.90902e-08			YOR334W					YBR278W	788.608	0.637687	4.43457e-09		YBR278W	788.608	0.734631	1.41891e-12			YOL001W		YBR077C
	YDR495C	54.2655	-0.238131	0.541088		YDR540C	130.81	-0.130429	0.667279			YDL139C					YBR279W	3319.64	-0.1258	0.0779242		YBR279W	3319.64	0.170658	0.0104442			YOR386W		YGR108W
	YDR496C	589.125	-0.240685	0.203804		YDR541C	479.576	-0.964181	5.8261e-09			YDR186C					YBR280C	1255.93	0.731287	7.52522e-14		YBR280C	1255.93	1.10356	1.60125e-32			YMR023C		YJL157C
	YDR497C	12293.2	0.973912	6.52734e-18		YEL001C	4254.49	0.403719	0.000746352			YMR299C					YBR281C	3164.07	-0.2092	0.00137432		YBR281C	3164.07	-0.216451	0.000540415			YMR019W		YBR291C
	YDR498C	219.128	0.2481	0.248716		YEL002C	3565.5	0.444398	0.000194418			YDR354W					YBR282W	1193.57	0.207722	0.0297444		YBR282W	1193.57	-0.200222	0.0284348			YDR014W		YLL066C
	YDR499W	266.649	1.59104	8.46588e-16		YEL003W	2612.69	0.448509	0.000878759			YAL001C					YBR283C	11204.7	-0.647178	6.67369e-45		YBR283C	11204.7	-1.06584	3.6047e-123			YBR117C		YJR138W
	YDR500C	12935.2	-1.39316	2.92481e-16		YEL004W	612.979	-0.0525269	0.78365			YBR262C					YBR284W	742.533	1.45863	1.14678e-31		YBR284W	742.533	2.04443	1.73099e-66			YBR083W		YER115C
	YDR501W	10.0604	6.52047	8.50532e-05		YEL005C	279.339	-0.628688	0.00118031			YFR019W					YBR285W	176.245	1.20044	0.000216739		YBR285W	176.245	0.470455	0.147219					YIR016W
	YDR502C	999.26	-0.705412	1.57336e-07		YEL006W	550.333	-0.116871	0.526229			YNL058C					YBR286W	16042.1	-0.922778	5.77367e-99		YBR286W	16042.1	-1.25002	7.98188e-186					YNL051W
	YDR503C	458.41	0.188046	0.332269		YEL007W	1642.01	0.366753	0.00850231			YCR026C					YBR287W	7969.92	-0.567399	3.52601e-23		YBR287W	7969.92	-0.534331	1.35276e-21					YPL188W
	YDR505C	551.853	-0.335695	0.031613		YEL008C-A	131.459	-0.421838	0.130977			YHR075C					YBR288C	1656.01	-0.104094	0.220372		YBR288C	1656.01	0.236089	0.00194788					YOR022C
	YDR506C	34.7737	-0.522793	0.251245		YEL009C	20683	-0.919879	1.89307e-16			YNL051W					YBR289W	3059.26	-0.135724	0.0804603		YBR289W	3059.26	0.601611	7.0991e-18					YGR046W
	YDR507C	526.058	0.147931	0.374565		YEL009C-A	12.8408	-6.88441	4.2277e-05			YMR068W					YBR290W	2103.23	-0.00153097	0.986899		YBR290W	2103.23	0.00600013	0.951504					YBR289W
	YDR508C	1464.4	0.742991	1.06544e-08		YEL011W	289.635	-2.37159	7.69024e-31			YGR130C					YBR291C	1782.42	1.23588	1.1522e-58		YBR291C	1782.42	0.604553	1.62514e-15					YLL032C
	YDR510C-A	20.5483	7.55069	1.82076e-06		YEL012W	262.746	-0.537131	0.0101475			YDL124W					YBR292C	244.256	0.407482	0.0285919		YBR292C	244.256	0.255439	0.156746					YNL127W
	YDR510W	5858.46	-0.38438	0.00122941		YEL013W	1715.05	0.193907	0.194343			YKL142W					YBR293W	2199.84	1.43827	5.30468e-65		YBR293W	2199.84	1.30081	6.22952e-55					YHL009C
	YDR511W	1214.35	0.339708	0.0369		YEL015W	563.123	0.014068	0.943517			YPR042C					YBR294W	267.819	1.71414	1.26324e-21		YBR294W	267.819	0.0900143	0.655385					YOR035C
	YDR513W	2496.88	-0.251687	0.22638		YEL016C	313.844	-0.727016	0.000103128			YGR205W					YBR295W	3974.69	0.385108	1.20121e-07		YBR295W	3974.69	1.41984	5.34419e-95					YGL162W
	YDR514C	201.629	-0.497753	0.0176766		YEL017C-A	15838.3	0.894197	5.16305e-16			YJR131W					YBR296C	1024.65	-0.440845	0.000382133		YBR296C	1024.65	0.0590452	0.629554					YLR442C
	YDR515W	192.604	0.238558	0.295499		YEL017W	789.904	0.528344	0.00029728			YMR268C					YBR296C-A	9.93391	1.08573	0.248292		YBR296C-A	9.93391	-0.536773	0.578715					YKR086W
	YDR516C	1343.79	1.05975	1.91083e-15		YEL018W	318.913	0.0149964	0.948166			YOR213C					YBR297W	1571.03	1.60879	3.97481e-78		YBR297W	1571.03	0.696499	5.52067e-16					YIL009C-A
	YDR517W	1357.07	-0.171035	0.222769		YEL019C	39.2013	-0.278616	0.579			YJL112W					YBR298C	1981.71	3.06479	6.62177e-233		YBR298C	1981.71	2.74985	1.28443e-190					YPL158C
	YDR518W	771.741	-1.24445	1.28069e-18		YEL020C	50.2139	-0.607964	0.14468			YAL055W					YBR298C-A	4.49113	3.28462	0.0887887		YBR298C-A	4.49113	2.7587	0.143535					YJR033C
	YDR519W	3620.45	0.132267	0.757493		YEL020C-B	550.891	0.612117	0.000239154			YGL136C					YBR299W	240.583	1.79858	5.82694e-17		YBR299W	240.583	1.31337	4.78355e-10					YOR201C
	YDR520C	78.2417	0.415339	0.223256		YEL020W-A	3329.29	0.540128	3.13655e-05			YML129C					YBR300C	33.2666	0.4787	0.353038		YBR300C	33.2666	-0.0258214	0.962077					YJL135W
	YDR524C	1290.25	0.00643586	0.96704		YEL021W	1493.44	0.102019	0.498413			YDL072C					YBR301W	163.226	-0.701143	0.0288997		YBR301W	163.226	-0.686976	0.015478					YDR473C
	YDR524C-A	9.00495	6.36079	0.000155684		YEL022W	451.635	0.0762498	0.703696			YOL026C					YBR302C	1988.91	0.0983808	0.242583		YBR302C	1988.91	-0.682319	3.98936e-19					YNL199C
	YDR524C-B	85577.4	-0.669304	0.111012		YEL023C	82.8979	-0.431347	0.194384			YKR087C					YDR293C	11859.6	0.421207	3.86748e-21		YDR293C	11859.6	0.155367	0.000529747					YDL107W
	YDR525W-A	7370.01	1.58968	1.00872e-21		YEL024W	5586.44	-0.180727	0.16778			YJL044C					YDL183C	443.253	0.570338	0.000105653		YDL183C	443.253	0.838122	1.12323e-09					YDR379C-A
	YDR527W	354.798	-0.520219	0.00424155		YEL025C	598.026	-0.747499	2.52113e-06			YNL188W					YDL112W	6695.45	-0.471565	1.19027e-19		YDL112W	6695.45	-0.386165	2.69774e-14					YBR066C
	YDR528W	632.573	0.455657	0.00255533		YEL026W	20301.3	0.931344	2.8635e-12			YDR344C					YDL033C	1988.93	0.215977	0.00391067		YDL033C	1988.93	0.964745	5.04361e-45					YOR319W
	YDR529C	6817.4	-0.192286	0.104237		YEL027W	56414.1	0.0257349	0.912134			YGR038W					YDR036C	2031.26	-0.390666	3.5984e-08		YDR036C	2031.26	-0.33893	4.97599e-07					YLR067C
	YDR530C	495.838	1.86141	1.87202e-20		YEL028W	216.606	-0.583208	0.0107819			YLR016C					YDR100W	2025.65	0.58472	1.69466e-13		YDR100W	2025.65	-0.479909	1.13204e-09					YPL066W
	YDR531W	662.37	-0.792502	6.17902e-08		YEL029C	1493.72	-0.335471	0.0125775			YBR255W					YDR166C	3205.58	-0.329414	1.1595e-07		YDR166C	3205.58	0.213201	0.000336481					YPL213W
	YDR532C	466.506	0.985617	4.16719e-09		YEL030W	31.0036	-0.259124	0.667279			YLR453C					YDR351W	4336.93	0.141695	0.0152674		YDR351W	4336.93	0.713424	1.59031e-40					YGL113W
	YDR533C	888.811	-1.02452	4.28122e-14		YEL031W	3218.07	0.410312	0.00534903			YMR021C					YDR420W	9584.5	-0.721524	5.04717e-37		YDR420W	9584.5	0.099081	0.0882704					YLL027W
	YDR536W	76.7055	9.45111	5.28012e-10		YEL032W	334.07	-0.398269	0.0422236			YDR236C					YDR496C	5165.79	-0.403919	7.65259e-11		YDR496C	5165.79	-0.268657	9.75133e-06					YMR252C
	YDR538W	1591.24	0.462743	0.001103		YEL033W	138.858	-10.3187	2.28221e-11			YMR041C					YDL248W	1594.73	0.368734	3.36127e-06		YDL248W	1594.73	-0.356985	4.17229e-06					YDR179C
	YDR539W	435.456	0.0294863	0.877414		YEL034W	93226.1	0.393609	0.00112772			YKL108W					YDL247W-A	134.396	0.909131	0.00021438		YDL247W-A	134.396	0.564545	0.0189213					YLR247C
	YDR540C	95.845	-0.934619	0.000774598		YEL036C	648.366	0.397271	0.0103634			YLR187W					YDL247W	387.729	0.566655	0.000254834		YDL247W	387.729	0.373526	0.013126					YKL149C
	YDR541C	497.656	1.02727	4.97796e-11		YEL037C	1058.36	0.40705	0.0050684			YML025C					YDL246C	3.11839	1.42369	0.430498		YDL246C	3.11839	1.05725	0.547655					YLR274W
	YEL001C	4181.99	-0.488124	2.89873e-05		YEL038W	3514.4	0.112451	0.426784			YNR061C					YDL245C	33.0303	1.93791	0.0019725		YDL245C	33.0303	1.13914	0.0686476					YAL064W-B
	YEL002C	3187.57	-0.891109	1.12849e-14		YEL039C	464.99	-1.01411	8.42187e-10			YFR046C					YDL244W	232.777	1.76321	6.00726e-19		YDL244W	232.777	0.410629	0.0464776					YDR173C
	YEL003W	2932.44	-0.105217	0.467063		YEL040W	3895.51	-0.32397	0.00808753			YGR126W					YDL243C	910.374	1.5702	2.33186e-47		YDL243C	910.374	1.03836	4.39606e-22					YGR104C
	YEL004W	594.508	-0.0581028	0.741545		YEL041W	56.014	-9.00925	9.76254e-09			YJL071W					YDL242W	54.4119	1.70771	1.93335e-05		YDL242W	54.4119	1.46369	0.00016892					YNL294C
	YEL005C	316.7	0.899483	5.09028e-07		YEL042W	2886.28	0.457686	0.000207477			YGL073W					YDL241W	955.789	0.536381	1.3259e-06		YDL241W	955.789	0.0137766	0.911446					YDR419W
	YEL006W	537.723	0.0297701	0.868727		YEL043W	286.347	0.235323	0.265149			YIL046W					YDL240C-A	2.29443	2.0907	0.335838		YDL240C-A	2.29443	-2.43646	0.346811					YCR096C
	YEL007W	1707.74	-0.264685	0.0517728		YEL044W	916.212	0.742369	5.66929e-07			YKL219W					YDL240W	2748.42	-0.446625	1.22411e-12		YDL240W	2748.42	0.486568	7.26481e-17					YHR102W
	YEL008C-A	192.733	1.26791	4.21963e-09		YEL045C	11.4893	-6.72103	7.85695e-05			YOR368W					YDL239C	893.577	0.312309	0.00333601		YDL239C	893.577	1.42737	3.29636e-50					YLR306W
	YEL009C	15648.5	0.228502	0.0557288		YEL046C	3415.75	0.51226	8.31288e-05			YLR047C					YDL238C	917.04	0.896171	4.24927e-17		YDL238C	917.04	0.983583	9.73938e-22					YOL138C
	YEL009C-A	71.8933	9.35761	8.07468e-10		YEL047C	1399.74	0.354635	0.00896524			YPL216W					YDL237W	3288.92	-0.213493	0.000622945		YDL237W	3288.92	-0.478291	5.5492e-16					YMR268C
	YEL011W	393.833	2.87407	1.39879e-51		YEL048C	1187.09	-1.47243	3.20513e-29			YPL167C					YDL236W	2946.65	-0.543901	4.34409e-18		YDL236W	2946.65	-0.425369	1.31592e-12					YIR023W
	YEL012W	293.378	0.77871	2.48482e-05		YEL049W	14.3023	-7.04014	2.45837e-05			YPL255W					YDL235C	2870.46	-0.404681	2.08302e-10		YDL235C	2870.46	-0.471307	8.72075e-15					YAL060W
	YEL013W	1519.05	-0.626774	6.89946e-07		YEL050C	1380.3	0.190285	0.208672			YDR383C					YDL234C	3769.41	0.394311	6.5877e-10		YDL234C	3769.41	0.368178	2.1226e-09					YOR127W
	YEL015W	634.113	0.291883	0.0563841		YEL051W	3439.55	0.27807	0.027362			YOL135C					YDL233W	1354.97	0.517105	5.89973e-09		YDL233W	1354.97	0.353	3.89476e-05					YOR172W
	YEL016C	350.169	0.955418	8.20719e-08		YEL052W	853.126	-0.452665	0.00253555			YML064C					YDL232W	911.059	0.357983	0.00032002		YDL232W	911.059	-0.636616	3.99242e-11					YHR015W
	YEL017C-A	12641.9	-2.19488	1.40815e-83		YEL053C	922.922	-0.193339	0.213281			YJL119C					YDL231C	5914.52	0.859082	7.70107e-66		YDL231C	5914.52	0.927587	1.71716e-79					YLR049C
	YEL017W	860.576	-0.267417	0.0661328		YEL054C	51871.7	0.309161	0.00989389			YLR310C					YDL230W	1094.59	0.283872	0.00614559		YDL230W	1094.59	0.274218	0.0054727					YJR052W
	YEL018W	283.708	-0.402921	0.032141		YEL055C	1694.77	0.257322	0.0596514			YPR115W					YDL229W	38574.2	-0.757552	7.99872e-67		YDL229W	38574.2	-1.54803	3.49443e-277					YGL057C
	YEL019C	57.6076	1.15144	0.00155596		YEL056W	622.663	-0.168132	0.330555			YHL019C					YDL228C	3.68149	-2.31741	0.143416		YDL228C	3.68149	-2.28079	0.100912					YLR046C
	YEL020C	57.2063	0.892505	0.0137469		YEL057C	12.4913	-6.84298	4.83972e-05			YOR130C					YDL227C	1988	-1.11323	1.56546e-37		YDL227C	1988	0.551862	1.57739e-11					YNL126W
	YEL020C-B	412.236	-2.13163	2.43551e-34		YEL058W	2073.72	0.250163	0.0998494			YOR166C					YDL226C	3180.17	-0.208861	0.00261877		YDL226C	3180.17	-0.609792	1.6216e-20					YKL022C
	YEL020W-A	3337.77	-0.557659	1.7236e-05		YEL059C-A	1142.38	0.19582	0.194384			YMR022W					YDL225W	3262.87	-0.380951	2.5064e-08		YDL225W	3262.87	-0.1184	0.0809152					YOL112W
	YEL021W	1335.23	-0.486076	0.000165959		YEL059W	9.97891	-6.51822	0.000149463			YOL067C					YDL224C	6403.53	0.342915	3.09119e-09		YDL224C	6403.53	0.427015	3.60052e-14					YNL242W
	YEL022W	380.62	-0.667166	8.30101e-05		YEL060C	454.049	-0.273695	0.155071			YCL033C					YDL223C	2794.5	1.00147	7.65747e-39		YDL223C	2794.5	1.28782	2.14244e-68					YEL006W
	YEL023C	95.9568	0.764113	0.00696052		YEL061C	229.06	0.437211	0.0582944			YDR100W					YDL222C	785.618	1.12598	0.000259407		YDL222C	785.618	0.38682	0.223451					YLR404W
	YEL024W	5378.53	0.0544192	0.67105		YEL062W	521.048	-0.51716	0.00139895			YGL035C					YDL221W	88.8616	2.3705	8.69486e-13		YDL221W	88.8616	0.398838	0.266916					YFL013C
	YEL025C	622.539	0.821796	1.53196e-07		YEL063C	1271.6	-0.639472	1.86265e-06			YGR257C					YDL220C	1882.94	0.294291	0.000211109		YDL220C	1882.94	0.466933	5.5572e-10					YKL185W
	YEL026W	17534.9	-1.70354	1.26305e-32		YEL064C	156.206	-0.19365	0.496315			YLR451W					YDL219W	1437.81	-0.238373	0.00387303		YDL219W	1437.81	-0.47551	6.84933e-10					YJR135C
	YEL027W	54661.8	-0.140353	0.488925		YEL065W	567.115	-0.0799018	0.690584			YDR249C					YDL218W	459.919	0.704446	3.42933e-06		YDL218W	459.919	-0.101074	0.531335					YER129W
	YEL028W	417.55	1.9216	3.74217e-25		YEL066W	1497.65	0.0178768	0.91796			YPR198W					YDL217C	1271.04	0.171953	0.0496576		YDL217C	1271.04	0.22155	0.00679686					YML102W
	YEL029C	1370.49	0.0832854	0.617007		YEL068C	718.617	0.0164554	0.933368			YJL093C					YDL216C	976.955	0.710902	9.0252e-12		YDL216C	976.955	1.14695	4.51943e-31					YOR043W
	YEL030W	58.348	1.64277	1.46453e-05		YEL071W	4557.77	0.636712	3.27913e-07			YER068W					YDL215C	4850.58	1.20417	5.97274e-92		YDL215C	4850.58	1.37058	7.13508e-124					YGR056W
	YEL031W	2590.32	-1.32196	2.01054e-29		YEL072W	296.511	-1.30467	2.52932e-12			YIR005W					YDL214C	310.804	1.22631	1.32666e-09		YDL214C	310.804	1.93004	2.57025e-24					YGR246C
	YEL032W	291.204	0.00791178	0.971319		YEL073C	259.805	-1.92201	4.37277e-21			YGR170W					YDL213C	2232.69	-0.316049	0.000382823		YDL213C	2232.69	-0.613582	5.26517e-13					YNL054W
	YEL033W	76.1046	9.43968	5.51569e-10		YEL075C	57.2082	-9.03868	0.108834			YPL002C					YDL212W	5491.24	-0.306292	2.36735e-07		YDL212W	5491.24	-0.931389	1.87871e-59					YPL069C
	YEL034W	72846.2	-1.4502	6.29293e-35		YER001W	2761.37	0.408342	0.00189058			YHR101C					YDL211C	1410.01	0.380859	1.05202e-05		YDL211C	1410.01	1.35633	2.16636e-65					YNL053W
	YEL036C	664.889	-0.339056	0.02288		YER002W	2172.36	0.369454	0.0208274			YNL199C					YDL210W	954.255	0.191678	0.192855		YDL210W	954.255	-0.535621	6.27657e-05					YOR031W
	YEL037C	990.355	-0.668851	3.99008e-06		YER003C	5149.06	0.0941801	0.521565			YMR293C					YDL209C	937.69	0.540019	1.42675e-07		YDL209C	937.69	0.780372	1.0027e-15					YDR466W
	YEL038W	3458.71	-0.183939	0.146915		YER004W	2451.53	0.432454	0.00145817			YBR167C					YDL208W	3318.6	-0.348289	6.57355e-07		YDL208W	3318.6	-0.786706	1.66647e-31					YHR204W
	YEL039C	851.432	2.16675	6.0542e-49		YER005W	159.599	-0.0512922	0.873375			YOL073C					YDL207W	1774.96	-0.194751	0.0256753		YDL207W	1774.96	0.333048	3.59697e-05					YDR240C
	YEL040W	3001.32	-0.47052	7.0427e-05		YER006W	1153.65	0.506889	0.000188371			YJR096W					YDL206W	2136.35	0.424872	1.03763e-07		YDL206W	2136.35	0.724558	2.50588e-21					YLL067C
	YEL041W	80.9107	9.52807	3.6419e-10		YER007C-A	2651.88	1.0974	1.76647e-13			YCL057W					YDL205C	4085.16	-0.64815	2.65629e-24		YDL205C	4085.16	-0.195201	0.00189892					YHR177W
	YEL042W	2756.63	-0.648153	2.00678e-07		YER007W	44.8312	1.11831	0.00634389			YCR043C					YDL204W	4977.6	1.97115	1.53627e-220		YDL204W	4977.6	1.63611	1.32672e-157					YHL040C
	YEL043W	294.722	-0.16931	0.38585		YER008C	650.747	-0.232194	0.158216			YLR290C					YDL203C	2641.52	0.275149	0.000314719		YDL203C	2641.52	0.288021	9.56669e-05					YLL060C
	YEL044W	1208.43	0.126999	0.424865		YER009W	28009.8	0.693713	2.93547e-08			YLR356W					YDL202W	1467.22	-0.0280817	0.765443		YDL202W	1467.22	-0.186787	0.0208829					YLR016C
	YEL045C	13.0036	6.8905	2.26064e-05		YER010C	579.951	-0.0227526	0.908018			YLR275W					YDL201W	2336.89	-0.660057	4.28081e-21		YDL201W	2336.89	-0.54426	4.69649e-16					YDR244W
	YEL046C	3856.1	-0.142149	0.271781		YER011W	51.034	9.35916	2.46715e-09			YLR431C					YDL200C	749.656	0.313225	0.00622558		YDL200C	749.656	-0.0598092	0.614039					YLR298C
	YEL047C	1402.84	-0.37243	0.00423552		YER012W	1992.95	0.274938	0.0404168			YHR162W					YDL199C	1124.24	1.0324	1.04469e-25		YDL199C	1124.24	1.0216	5.06108e-27					YGL110C
	YEL048C	1038.5	1.18728	1.418e-18		YER013W	104.235	-0.480829	0.121829			YCR028C-A					YDL198C	4266.48	0.0027444	0.96894		YDL198C	4266.48	-0.595696	1.68652e-23					YDR026C
	YEL049W	130.347	10.2161	1.35361e-11		YER014W	133.986	0.125217	0.676776			YGR006W					YDL197C	2213.34	1.6734	4.7551e-105		YDL197C	2213.34	1.38359	2.2815e-74					YLR032W
	YEL050C	1335.09	-0.319781	0.0395244		YER015W	41.5309	-8.57741	6.22011e-08			YGR076C					YDL196W	61.8335	1.1618	0.00262709		YDL196W	61.8335	1.11431	0.0025499					YAL034W-A
	YEL051W	2743.54	-1.17017	5.191e-22		YER016W	641.17	0.171914	0.3231			YJL149W					YDL195W	17631.2	-0.782201	5.19113e-48		YDL195W	17631.2	-0.87255	1.05522e-60					YCL039W
	YEL052W	794.65	0.250316	0.0909275		YER017C	599.908	0.352636	0.0301943			YNR006W					YDL194W	1198.26	0.323325	0.0189854		YDL194W	1198.26	0.656222	4.20604e-07					YKL059C
	YEL053C	854.285	-0.0454009	0.773739		YER018C	373.19	0.276134	0.144086			YOL138C					YDL193W	1544.16	-0.228746	0.00592434		YDL193W	1544.16	-0.1196	0.136541					YFR021W
	YEL054C	40840.5	-1.27871	1.66794e-30		YER019C-A	9694.8	1.08302	3.57828e-20			YJR083C					YDL192W	5711.1	-0.51207	1.8305e-21		YDL192W	5711.1	-1.25284	2.42664e-125					YDL155W
	YEL055C	1380.89	-1.04361	1.68867e-16		YER019W	988.188	-0.0969176	0.566282			YKL051W					YDL191W	9058.76	-0.692093	4.47594e-36		YDL191W	9058.76	-1.47971	4.96775e-163					YNL316C
	YEL056W	605.885	0.0715114	0.664861		YER020W	424.099	-0.187126	0.31661			YMR182C					YDL190C	6168.56	-0.040366	0.465748		YDL190C	6168.56	0.0385366	0.467277					YNR065C
	YEL057C	29.956	8.09475	2.16191e-07		YER021W	570.347	0.262107	0.138197			YGR207C					YDL189W	1850.62	0.0633108	0.491901		YDL189W	1850.62	0.0444699	0.617332					YDL129W
	YEL058W	2135.06	-0.182815	0.152221		YER022W	332.642	-0.475297	0.0170274			YLR437C					YDL188C	4255.09	-0.318855	8.41492e-09		YDL188C	4255.09	-0.229543	1.68395e-05					YPL071C
	YEL059C-A	1143.36	-0.217175	0.149896		YER023C-A	7.9723	-6.19768	0.000444313			YDL194W					YDL187C	283.926	1.96093	1.2945e-28		YDL187C	283.926	-0.324402	0.0886329					YGL176C
	YEL059W	9.01532	6.36214	0.00014655		YER023W	781.05	0.526874	0.00078617			YLR049C					YDL186W	45.4397	0.512044	0.288378		YDL186W	45.4397	0.984915	0.0226425					YPL150W
	YEL060C	500.474	0.502589	0.00245874		YER025W	4825.57	0.160812	0.312188			YER018C					YDL185C-A	1.70452	0.711166	0.76566		YDL185C-A	1.70452	-0.161168	0.946753					YOR348C
	YEL061C	272.799	0.0750311	0.750202		YER026C	1554.74	-0.192075	0.288871			YOL142W					YDL185W	23264.3	-0.528963	8.43321e-27		YDL185W	23264.3	-1.47298	1.1617e-200					YNL214W
	YEL062W	487.522	0.330431	0.0424738		YER027C	1028.11	-0.0198205	0.908213			YNL006W					YDL184C	2443.2	-0.788083	1.61281e-29		YDL184C	2443.2	-1.64668	2.08137e-128					YLR205C
	YEL063C	1857.03	1.43656	4.62398e-26		YER028C	54.5539	0.392154	0.335213			YGR157W					YDL182W	3865.87	-0.0645915	0.350156		YDL182W	3865.87	-0.555834	1.92347e-19					YDR545W
	YEL064C	171.202	0.412814	0.0764556		YER029C	527.395	0.498709	0.00198832			YNL249C					YDL181W	2550.24	-0.749351	3.75474e-32		YDL181W	2550.24	-1.08063	7.11549e-71					YOR060C
	YEL065W	1091.91	1.55182	4.575e-31		YER030W	1875.42	-0.0429586	0.818973			YMR001C					YDL180W	2605.49	-0.0670969	0.381207		YDL180W	2605.49	0.4105	9.59707e-10					YDR362C
	YEL066W	1446.37	-0.143491	0.339964		YER031C	2200.02	0.519256	2.94696e-05			YGR189C					YDL179W	2705.69	0.278196	9.74724e-05		YDL179W	2705.69	0.714085	1.95399e-26					YLR265C
	YEL068C	666.21	-0.269514	0.0872614		YER032W	151.798	0.0795796	0.783522			YLR298C					YDL178W	3008.77	-0.159932	0.0101011		YDL178W	3008.77	-0.354488	1.02785e-09					YDR282C
	YEL070W	35.6337	8.34499	7.09883e-08		YER033C	121.37	-0.450224	0.123269			YBL025W					YDL177C	539.026	0.488618	0.000311568		YDL177C	539.026	0.697384	4.92817e-08					YGL004C
	YEL071W	4582.59	-0.644371	6.88161e-08		YER034W	86.0637	-0.0896938	0.811206			YPR154W					YDL176W	1591.12	0.70297	8.55137e-20		YDL176W	1591.12	1.11375	1.1779e-51					YLR462W
	YEL072W	395.352	1.84502	1.4661e-26		YER035W	788.941	-0.36405	0.0186176			YCR011C					YDL175C	763.906	0.417372	0.0002593		YDL175C	763.906	0.776013	3.67541e-13					YPR025C
	YEL073C	581.968	3.27141	1.39807e-78		YER036C	4253.39	0.0309122	0.843337			YKR007W					YDL174C	4137.25	0.0761149	0.211965		YDL174C	4137.25	-0.327583	3.30585e-09					YJR115W
	YER001W	2161.83	-1.46491	1.3298e-30		YER037W	642.522	0.598705	6.45156e-05			YKR050W					YDL173W	2682.94	0.252281	0.000316364		YDL173W	2682.94	0.116929	0.092053					YHR018C
	YER002W	2190.84	-0.367767	0.0193105		YER038C	390.52	-0.794673	3.98169e-06			YMR163C					YDL172C	36.6206	-0.797049	0.091124		YDL172C	36.6206	-0.615392	0.160642					YBR195C
	YER003C	4241.83	-0.777691	1.13102e-10		YER038W-A	35.21	-0.251383	0.641181			YML112W					YDL171C	19585.9	-1.46734	2.19399e-196		YDL171C	19585.9	-1.45071	2.78355e-196					YDR375C
	YER004W	2449.69	-0.46039	0.000896024		YER039C-A	138.232	-1.1275	5.70696e-06			YAR033W					YDL170W	1647.69	0.568435	1.10624e-12		YDL170W	1647.69	0.960567	1.29312e-36					YDL227C
	YER005W	137.796	-0.423762	0.0868736		YER040W	446.472	-1.0398	5.85192e-10			YHL044W					YDL169C	446.429	1.39922	9.9715e-17		YDL169C	446.429	0.667167	6.50166e-05					YNR023W
	YER006C-A	29.1444	8.05489	2.41801e-07		YER041W	222.852	-0.864396	8.44267e-05			YKL042W					YDL168W	3074.51	-0.0904588	0.244078		YDL168W	3074.51	-0.657839	7.82419e-21					YPL215W
	YER006W	1062.22	-0.845069	1.72385e-10		YER042W	1179.22	0.576268	7.16465e-05			YCL047C					YDL167C	4561.3	-0.467696	6.97635e-16		YDL167C	4561.3	0.0281155	0.650393					YDR243C
	YER007C-A	2595.77	-1.23157	2.74777e-15		YER043C	15417.2	0.1414	0.27348			YML114C					YDL166C	1195.65	-0.366754	0.000227716		YDL166C	1195.65	-0.45773	1.06023e-06					YGL144C
	YER007W	43.7068	-1.27561	0.00146559		YER044C	5529.52	0.913829	1.02874e-13			YML053C					YDL165W	1055.49	-0.402979	8.9785e-05		YDL165W	1055.49	-0.301273	0.00208813					YPL259C
	YER008C	528.161	-0.412016	0.00933858		YER045C	344.329	0.0203145	0.934891			YPL157W					YDL164C	2571.2	0.0501912	0.532902		YDL164C	2571.2	0.485728	2.75938e-12					YER186C
	YER009W	24773.7	-1.24947	4.45463e-24		YER046W	341.943	-0.332148	0.0812093			YDR265W					YDL163W	2.40122	0.441118	0.833211		YDL163W	2.40122	-3.0574	0.188719					YER123W
	YER010C	565.381	-0.0733521	0.677547		YER047C	123.693	0.3162	0.286307			YCR060W					YDL162C	20.3373	1.39876	0.0582731		YDL162C	20.3373	2.07911	0.00237838					YOR076C
	YER011W	72.5817	-1.28181	7.04961e-05		YER048C	777.73	-0.196224	0.222746			YJR111C					YDL161W	5197.85	-0.497307	1.07406e-09		YDL161W	5197.85	-0.414173	2.31725e-07					YKR021W
	YER012W	1967.48	-0.341095	0.00685723		YER048W-A	3011.05	-0.540711	5.95916e-05			YJL066C					YDL160C-A	394.038	-0.172931	0.273904		YDL160C-A	394.038	-0.514409	0.000295898					YOL154W
	YER013W	94.2638	0.200123	0.515695		YER049W	1316.67	0.971815	1.75617e-13			YLR089C					YDL160C	6810.19	0.612019	0.345325		YDL160C	6810.19	0.529829	0.406983					YKR098C
	YER014W	146.934	0.119592	0.641652		YER050C	1468.88	0.142726	0.372345			YER151C					YDL159W-A	14.1058	1.29134	0.518399		YDL159W-A	14.1058	0.524983	0.78822					YCR027C
	YER015W	122.481	10.1261	2.1449e-11		YER051W	104.92	0.271156	0.394825			YHR204W					YDL159W	1558.83	0.139169	0.100841		YDL159W	1558.83	0.691731	3.59828e-20					YPR199C
	YER016W	561.685	-0.641171	3.96871e-05		YER052C	2530.13	-0.210198	0.121829			YDR004W					YDL159C-B	3.42864	0.30159	0.862835		YDL159C-B	3.42864	0.442265	0.779157					YPR071W
	YER017C	715.346	0.150136	0.347715		YER053C	1317.86	0.200523	0.175482			YDR151C					YDL158C	217.282	-0.443389	0.0457001		YDL158C	217.282	-1.02978	6.37279e-07					YIL031W
	YER018C	523.253	0.62261	7.05862e-05		YER053C-A	7028.84	-0.509308	8.82334e-06			YBR215W					YDL157C	1020.94	-0.4451	1.17735e-05		YDL157C	1020.94	-1.10891	3.5688e-30					YPL095C
	YER019C-A	9608.2	-1.15975	1.92418e-20		YER054C	15.3776	-7.14431	1.65653e-05			YPR178W					YDL156W	975.164	0.208851	0.040696		YDL156W	975.164	0.868801	2.31308e-21					YPR175W
	YER019W	866.737	-0.319146	0.025325		YER055C	12341.9	-1.23133	2.41321e-29			YPL190C					YDL155W	2318.51	-0.0935975	0.186625		YDL155W	2318.51	0.562162	1.14219e-19					YCL032W
	YER020W	406.076	0.0454691	0.808328		YER056C	9098.18	0.1862	0.161411			YPL209C					YDL154W	943.521	1.15081	3.78112e-32		YDL154W	943.521	1.04983	2.42399e-28					YFR019W
	YER021W	513.884	-0.643924	0.000330443		YER056C-A	39909.6	0.749273	2.12354e-11			YOL107W					YDL153C	2236.32	-0.95873	0.00287356		YDL153C	2236.32	-0.920077	0.00370981					YKL028W
	YER022W	282.47	0.0196802	0.928412		YER057C	9224.63	0.602176	4.41097e-05			YLR408C					YDL152W	6.79229	1.3106	0.283862		YDL152W	6.79229	0.670114	0.579646					YOR134W
	YER023C-A	25.7965	7.87878	5.04108e-07		YER058W	432.691	-0.1815	0.350204			YHR040W					YDL151C	5.06548	3.74402	0.0604679		YDL151C	5.06548	3.26983	0.0898729					YNL295W
	YER023W	615.137	-1.62624	3.45267e-18		YER059W	289.958	-0.381755	0.0586858			YDR200C					YDL150W	2451.03	-0.565519	2.43859e-11		YDL150W	2451.03	-0.209732	0.0122684					YPL222W
	YER025W	4320.26	-0.550179	4.1607e-05		YER060W	505.522	1.86615	7.2063e-30			YGR153W					YDL149W	1370.92	0.22759	0.011737		YDL149W	1370.92	1.01958	1.25609e-36					YHR016C
	YER026C	1970.18	0.761631	8.19652e-07		YER061C	283.35	-0.4546	0.0285461			YLR092W					YDL148C	3891.94	-0.416474	2.3592e-09		YDL148C	3891.94	-0.223091	0.00113809					YKR061W
	YER027C	885.239	-0.472404	0.000606501		YER062C	725.513	-0.127262	0.455692			YOR148C					YDL147W	7112.5	0.00277374	0.963499		YDL147W	7112.5	-0.194132	7.12897e-05					YIR021W
	YER028C	46.0578	-1.07029	0.00583802		YER063W	769.42	-0.0208944	0.913426			YBR182C					YDL146W	1050.88	-0.504667	5.60044e-07		YDL146W	1050.88	0.422459	6.9602e-06					YKL155C
	YER029C	555.635	-0.34888	0.0268645		YER064C	216.677	-0.445398	0.0428697			YIL036W					YDL145C	16389.2	-0.613211	1.48052e-36		YDL145C	16389.2	-0.782872	3.3962e-60					YNL298W
	YER030W	1873.55	0.0176185	0.924153		YER065C	96.6165	-0.345441	0.295453			YPL060W					YDL144C	3225.08	-0.384079	1.09242e-09		YDL144C	3225.08	-0.626093	4.19572e-25					YDR407C
	YER031C	2021.09	-0.868091	7.67223e-11		YER066W	254.117	-1.68599	3.2776e-16			YKL069W					YDL143W	6174.09	-0.439472	9.39435e-19		YDL143W	6174.09	-0.497445	4.89285e-25					YFL066C
	YER032W	172.98	0.265079	0.254806		YER067W	588.498	-1.50629	4.33913e-23			YER163C					YDL142C	1342.73	0.377405	2.5477e-05		YDL142C	1342.73	1.09062	1.50952e-39					YLL058W
	YER033C	126.911	0.542277	0.0426698		YER068W	627.987	-0.660296	2.91421e-05			YOR111W					YDL141W	3218.49	-0.0154734	0.833888		YDL141W	3218.49	-0.0413725	0.538836					YIL151C
	YER034W	122.451	0.933698	0.000301443		YER069W	501.235	-0.655193	4.64922e-05			YNL056W					YDL140C	22927.4	-0.85345	5.66999e-53		YDL140C	22927.4	-0.713859	3.63876e-38					YJR084W
	YER035W	949.083	0.791508	2.17492e-08		YER070W	1682.67	0.0210513	0.917664			YOL036W					YDL139C	488.099	0.195855	0.211464		YDL139C	488.099	0.831526	1.06813e-09					YJL126W
	YER036C	3241.15	-1.0104	7.42448e-18		YER071C	1236.17	0.841484	4.36502e-07			YJL115W					YDL138W	2904.32	0.0344868	0.633111		YDL138W	2904.32	0.525906	8.36824e-18					YHR067W
	YER037W	548.095	-1.30195	1.01826e-14		YER072W	14735.7	1.80989	9.32653e-44			YML111W					YDL137W	4573.65	-0.268476	6.73373e-07		YDL137W	4573.65	-1.02696	8.28217e-87					YMR282C
	YER038C	351.749	0.530555	0.00269282		YER073W	2329.77	-0.0373856	0.816457			YPL242C					YDL136W	4062.39	-0.672357	6.14326e-33		YDL136W	4062.39	-1.30009	1.05871e-124					YBR095C
	YER038W-A	49.7158	1.04614	0.00664899		YER074W	36099.1	0.761407	2.28775e-12			YDR026C					YDL135C	2291.04	-0.315049	3.6031e-06		YDL135C	2291.04	-0.791284	2.03081e-34					YLL002W
	YER039C-A	184.42	1.68503	1.89988e-13		YER074W-A	2141.28	0.61408	6.47809e-07			YBL040C					YDL134C	3660.07	-0.209852	0.000549522		YDL134C	3660.07	0.0351555	0.574996					YDR179W-A
	YER040W	448.786	1.03442	3.33925e-10		YER075C	122.266	-0.0138927	0.965258			YDR314C					YDL133C-A	2097.19	-0.34015	2.0229e-06		YDL133C-A	2097.19	-1.26918	2.40314e-75					YBL106C
	YER041W	221.694	0.835432	9.14595e-05		YER076C	175.307	-1.48429	1.83252e-10			YPR101W					YDL133W	1881.62	0.546883	5.2125e-12		YDL133W	1881.62	1.0659	2.0457e-45					YAL067C
	YER042W	1175.32	-0.615481	1.16113e-05		YER078C	314.754	-0.0619642	0.786477			YLR052W					YDL132W	5380.69	-0.0185312	0.796789		YDL132W	5380.69	0.308112	3.98893e-07					YPR101W
	YER043C	13864.7	-0.511462	5.94152e-06		YER079W	132.739	0.154336	0.599783			YDL230W					YDL131W	5349.47	-0.0934358	0.103515		YDL131W	5349.47	-0.372778	1.70187e-12					YDR435C
	YER044C	6149.64	-0.535629	1.79147e-05		YER080W	498.998	0.396957	0.0292272			YHR036W					YDL130W-A	2022.78	0.984798	4.02777e-35		YDL130W-A	2022.78	-0.154603	0.0621566					YMR115W
	YER045C	326.57	-0.202606	0.345695		YER081W	2102.63	0.270615	0.063298			YLR007W					YDL130W	8533.6	-0.548589	7.228e-25		YDL130W	8533.6	-1.58889	6.52545e-201					YMR106C
	YER046W	608.213	1.57923	6.26562e-25		YER082C	396.734	0.460315	0.013542			YKL087C					YDL129W	1114.19	-1.25179	1.24278e-33		YDL129W	1114.19	0.560978	2.22136e-09					YIL001W
	YER047C	156.05	0.333546	0.189253		YER083C	1891.81	0.0481609	0.767181			YHR086W					YDL128W	7768.11	-0.413009	1.00424e-13		YDL128W	7768.11	-1.02844	2.05017e-80					YOL128C
	YER048C	669.351	-0.264325	0.0868736		YER084W-A	37.7184	0.661454	0.157349			YJR006W					YDL127W	1446.49	-0.378756	6.75989e-05		YDL127W	1446.49	0.671259	1.85796e-14					YOR301W
	YER048W-A	2207.29	-0.3475	0.017752		YER086W	2232.59	0.54999	0.000429836			YIL071C					YDL126C	15175	-0.50304	6.30189e-32		YDL126C	15175	-0.960135	6.25209e-116					YNL311C
	YER049W	1365.73	-0.851799	1.38643e-11		YER087C-A	25.9141	8.37602	2.00567e-07			YBR102C					YDL125C	5487.73	0.391693	4.52216e-12		YDL125C	5487.73	-0.331825	3.01616e-09					YPL229W
	YER050C	1680.71	0.219124	0.0935577		YER087C-B	3309.76	0.54111	3.31124e-05			YBR241C					YDL124W	6900.46	0.367742	1.21545e-14		YDL124W	6900.46	-0.665669	1.21988e-45					YOR130C
	YER051W	122.75	0.164839	0.554385		YER087W	161.531	0.327294	0.213301			YIL122W					YDL123W	1685.01	0.249958	0.00352376		YDL123W	1685.01	-0.0142938	0.877642					YLR415C
	YER052C	2371.48	0.00902921	0.948996		YER088C	930.345	0.264462	0.0771526								YDL122W	5940.52	-0.373514	2.2535e-10		YDL122W	5940.52	-0.194519	0.000812177					YDR260C
	YER053C	1400.45	-0.0404823	0.778651		YER089C	1683.57	0.407844	0.00321231								YDL121C	2427.62	-0.191176	0.00978713		YDL121C	2427.62	-0.734562	3.80069e-26					YLR357W
	YER053C-A	13190.4	1.81278	5.89479e-52		YER090W	1284.54	-0.321268	0.0212109								YDL120W	1840.91	-0.0745314	0.376921		YDL120W	1840.91	-0.746912	1.93563e-23					YPL007C
	YER054C	55.3684	8.98067	4.62626e-09		YER091C	9445.48	-0.577902	9.74813e-06								YDL119C	1302.61	0.874927	6.68118e-17		YDL119C	1302.61	0.431153	3.3133e-05					YDL017W
	YER055C	7158	-0.109338	0.380011		YER092W	1268.29	-0.628998	3.48118e-06								YDL118W	7.57036	0.749443	0.504314		YDL118W	7.57036	-1.05944	0.340807					YGR013W
	YER056C	9743.69	-0.00396595	0.97674		YER093C	174.825	-0.21028	0.40924								YDL117W	4846.74	-0.132536	0.0261632		YDL117W	4846.74	0.607979	4.47263e-29					YIL143C
	YER056C-A	40605.8	-0.712077	9.63277e-09		YER093C-A	525.744	0.130193	0.486452								YDL116W	3562.02	-0.244605	0.000127203		YDL116W	3562.02	0.423056	1.42139e-12					YER143W
	YER057C	8943.19	-0.745387	9.89832e-07		YER094C	3524.91	-0.28941	0.0198764								YDL115C	1313.06	0.697492	5.5447e-13		YDL115C	1313.06	0.643069	7.55282e-12					YOL028C
	YER058W	373.293	-0.274831	0.181342		YER095W	1386.76	-0.546125	7.96105e-05								YDL114W-A	21.8915	0.487389	0.49485		YDL114W-A	21.8915	0.795052	0.219542					YDL138W
	YER059W	309.119	0.522798	0.00575783		YER096W	85.2583	-0.175483	0.643358								YDL114W	38.3822	0.081457	0.88943		YDL114W	38.3822	0.166654	0.747494					YHR131C
	YER060W	464.252	-2.63146	1.47457e-51		YER098W	10.2209	-6.55205	0.000140542								YDL113C	1610.52	0.676744	1.29036e-16		YDL113C	1610.52	1.06664	1.30659e-42					YJR141W
	YER061C	223.824	-0.219414	0.314286		YER099C	819.746	0.0359651	0.844777								YDL111C	3559.92	0.0216541	0.765225		YDL111C	3559.92	-0.181377	0.00375954					YDR027C
	YER062C	619.175	-0.373655	0.0189186		YER100W	282.04	0.424394	0.0321803								YDL110C	2429.77	0.989454	3.07638e-45		YDL110C	2429.77	0.566073	2.12131e-16					YPL159C
	YER063W	939.05	0.525942	0.000130167		YER101C	97.8198	-0.714282	0.016661								YDL109C	1308.35	1.6247	4.1173e-65		YDL109C	1308.35	1.87552	2.04831e-90					YHR031C
	YER064C	391.277	1.69082	1.66123e-22		YER102W	99405.9	-0.222177	0.0752062								YDL108W	1107.62	0.0842222	0.39172		YDL108W	1107.62	0.423291	7.36838e-07					YJL099W
	YER065C	95.9206	0.30523	0.300594		YER103W	98.9832	-1.37393	3.14077e-06								YDL107W	1011.71	0.416292	7.94142e-05		YDL107W	1011.71	0.593961	2.76463e-09					YMR147W
	YER066W	517.724	2.91502	4.05457e-58		YER104W	234.239	-0.611152	0.00527651								YDL106C	2217.33	0.692112	1.01921e-21		YDL106C	2217.33	1.25502	4.98276e-75					YOR038C
	YER067W	1025.97	2.49723	5.64372e-66		YER105C	486.887	-0.0375614	0.856551								YDL105W	890.654	0.571831	2.30477e-07		YDL105W	890.654	1.17998	5.30415e-30					YJL204C
	YER068W	629.308	0.647005	1.3785e-05		YER107C	894.717	-0.176076	0.27708								YDL104C	1067.02	-0.282331	0.390514		YDL104C	1067.02	-0.298892	0.349634					YMR059W
	YER069W	231.163	-2.48641	1.5398e-32		YER110C	2943.6	0.462783	0.000130959								YDL103C	2339.44	-0.195345	0.00744451		YDL103C	2339.44	-0.426115	4.27208e-10					YKL072W
	YER070W	1906.79	0.301208	0.0835773		YER111C	51.4094	-0.999434	0.018527								YDL102W	3263.89	-0.320489	6.5682e-07		YDL102W	3263.89	0.12899	0.0410865					YKL125W
	YER071C	1883.16	0.440212	0.00855358		YER112W	1114.19	0.307135	0.0403009								YDL101C	1996.34	-0.137377	0.0813402		YDL101C	1996.34	0.45278	1.2916e-10					YCR042C
	YER072W	13709.4	-2.41923	9.69188e-72		YER113C	691.276	0.479134	0.00287106								YDL100C	6163.24	-0.379665	3.30055e-13		YDL100C	6163.24	-0.881515	4.15104e-68					YAL047C
	YER073W	2143.59	-0.233937	0.080154		YER114C	811.268	0.163311	0.314595								YDL099W	1601.99	-0.127369	0.289336		YDL099W	1601.99	-0.231275	0.0381141					YGL163C
	YER074W	32357.2	-1.27112	2.35744e-29		YER115C	471.653	-0.493705	0.00310703								YDL098C	668.119	-0.289075	0.0173085		YDL098C	668.119	0.0858305	0.474201					YMR176W
	YER074W-A	2009.3	-0.890022	1.7439e-12		YER116C	354.594	-0.964357	3.24805e-07								YDL097C	4127.35	-0.227419	6.09481e-05		YDL097C	4127.35	-0.333965	5.81132e-10					YER075C
	YER075C	124.626	0.0478619	0.868913		YER117W	67313.8	0.842963	1.828e-14								YDL096C	12.2283	1.99263	0.0249421		YDL096C	12.2283	0.612309	0.511311					YCR092C
	YER076C	283.943	2.35112	8.07404e-27		YER118C	472.327	0.380713	0.0327154								YDL095W	13229.3	-1.01526	1.23368e-108		YDL095W	13229.3	-0.957057	9.39471e-101					YLR127C
	YER078C	309.006	-0.0127464	0.951717		YER119C	240.153	0.467912	0.028213								YDL094C	67.3105	2.54536	1.33996e-10		YDL094C	67.3105	2.40679	5.3372e-10					YJL084C
	YER079W	216.795	1.05284	6.15092e-07		YER120W	10391.6	0.29222	0.0157206								YDL093W	2853.84	-0.105824	0.148956		YDL093W	2853.84	-0.10545	0.130704					YDL073W
	YER080W	436.559	-0.922045	3.0821e-08		YER121W	39.8065	-0.859692	0.0619278								YDL092W	2431.93	-0.13676	0.0511853		YDL092W	2431.93	-0.644008	1.93247e-23					YNL039W
	YER081W	2433.84	0.13924	0.31655		YER122C	2066.94	-0.265403	0.045035								YDL091C	1641.45	0.0309055	0.733772		YDL091C	1641.45	0.291938	0.000132462					YMR037C
	YER082C	388.16	-0.563892	0.00182842		YER123W	818.983	-0.37852	0.0248894								YDL090C	1192.69	-0.065613	0.495408		YDL090C	1192.69	0.128784	0.137815					YNL206C
	YER083C	1979.32	0.0600951	0.666957		YER124C	3525.86	-0.587704	1.99767e-06								YDL089W	1031.27	-0.29012	0.00400873		YDL089W	1031.27	-0.00842515	0.93811					YOR069W
	YER084W-A	61.4708	0.717043	0.0398347		YER125W	1861.81	-0.155382	0.306422								YDL088C	3558.38	0.108729	0.0740651		YDL088C	3558.38	0.423976	1.66657e-14					YGR274C
	YER086W	2164.59	-0.692087	6.92138e-06		YER126C	1132.79	0.318098	0.0351055								YDL087C	763.296	0.712838	1.18844e-10		YDL087C	763.296	0.935874	8.50191e-19					YDR235W
	YER087C-A	38.2812	-1.09553	0.0167393		YER127W	486.01	-0.0992306	0.609733								YDL086W	5423.18	0.207887	0.000264492		YDL086W	5423.18	-0.771263	7.91699e-45					YNL250W
	YER087C-B	2860.5	-1.16055	2.12649e-16		YER128W	323.945	-0.143815	0.506962								YDL086C-A	84.7191	-0.11415	0.726859		YDL086C-A	84.7191	-1.17559	3.91224e-05					YNL213C
	YER087W	152.702	-0.545279	0.018649		YER129W	354.638	0.190122	0.361546								YDL085C-A	654.824	-0.448816	9.87182e-05		YDL085C-A	654.824	-1.06844	1.22657e-22					YHL038C
	YER088C	1065.32	0.114502	0.449139		YER130C	1832.19	1.17861	2.95382e-22								YDL085W	326.076	1.62285	5.1277e-14		YDL085W	326.076	1.19665	1.25227e-08					YKL011C
	YER089C	1644.26	-0.514763	4.70428e-05		YER131W	37262.4	0.26243	0.0418855								YDL084W	8928	-0.802954	4.09498e-65		YDL084W	8928	-1.09349	1.92191e-124					YDR229W
	YER090W	1186.8	0.0875566	0.550569		YER132C	461.379	0.66401	0.000105143								YDL083C	8065.82	-0.686894	8.42289e-41		YDL083C	8065.82	-1.36368	9.33983e-161					YLR026C
	YER091C	6293.7	-0.624996	1.16973e-07		YER133W	2813.25	0.720736	1.14838e-09								YDL082W	7339.02	-0.777395	3.0147e-44		YDL082W	7339.02	-1.2674	7.05629e-119					YHR172W
	YER092W	2195.87	1.75454	1.01839e-46		YER134C	772.574	-0.210111	0.187663								YDL081C	8795.92	-0.743229	1.64462e-37		YDL081C	8795.92	-1.50522	2.21868e-152					YDR052C
	YER093C	151.261	-0.231137	0.344035		YER136W	908.282	-0.37135	0.0100775								YDL080C	2074.7	0.326317	1.66558e-05		YDL080C	2074.7	0.622725	3.85023e-18					YER092W
	YER093C-A	562.777	0.047041	0.800328		YER137C	315.154	-0.615751	0.00089607								YDL079C	567.688	1.14645	3.7492e-17		YDL079C	567.688	0.685232	3.01961e-07					YPL064C
	YER094C	3761.84	0.436701	0.000760575		YER138W-A	27.1695	8.45113	1.43221e-07								YDL078C	3682.33	-0.338885	4.38946e-08		YDL078C	3682.33	-0.873024	1.22694e-48					YLR199C
	YER095W	1311.19	0.387769	0.0034647		YER139C	360.776	-1.07739	6.8128e-10								YDL077C	2375.01	0.407426	1.41607e-08		YDL077C	2375.01	0.691188	6.59554e-24					YCR102C
	YER096W	55.6939	-1.383	0.000273409		YER140W	303.781	-0.366237	0.0638466								YDL076C	1976.22	0.153864	0.0450164		YDL076C	1976.22	0.286864	5.17754e-05					YEL007W
	YER098W	23.4936	7.74383	8.7957e-07		YER141W	1986.09	0.111054	0.449033								YDL075W	6407.45	-0.639942	3.88001e-38		YDL075W	6407.45	-1.5568	1.87197e-223					YAL041W
	YER099C	913.486	0.244829	0.0980763		YER142C	276.647	-0.0157481	0.948166								YDL074C	3919.55	-0.363363	2.58334e-07		YDL074C	3919.55	0.297113	1.26997e-05					YDR291W
	YER100W	432.748	0.729509	9.17847e-06		YER143W	275.561	0.167787	0.441664								YDL073W	2607.31	0.0443119	0.641818		YDL073W	2607.31	0.518781	2.83106e-10					YJR061W
	YER101C	184.35	1.98123	1.15985e-17		YER144C	700.166	0.344623	0.0258825								YDL072C	5602.35	0.443846	9.15107e-17		YDL072C	5602.35	-0.679782	6.30002e-38					YGR072W
	YER102W	71502	-0.871203	7.68706e-15		YER145C	1089.72	-0.0742664	0.651358								YDL071C	80.4878	0.225235	0.518921		YDL071C	80.4878	-0.425631	0.190018					YAL056W
	YER103W	150.787	2.14913	7.8646e-17		YER146W	2781.11	1.00619	9.68931e-17								YDL070W	4913.66	-1.09822	5.91866e-92		YDL070W	4913.66	-0.231569	6.82771e-06					YER168C
	YER104W	273.877	0.951062	8.68298e-07		YER147C	161.325	-0.135909	0.624183								YDL069C	420.711	0.116603	0.481221		YDL069C	420.711	0.633338	9.20616e-06					YOL159C
	YER105C	409.275	-0.534089	0.00161836		YER148W	2656.18	0.26754	0.0366457								YDL068W	25.1877	-0.599692	0.29786		YDL068W	25.1877	-1.03945	0.047748					YIR005W
	YER107C	786.803	-0.219872	0.147385		YER149C	268.519	0.103401	0.660565								YDL067C	3747.47	0.151335	0.0121337		YDL067C	3747.47	-0.882514	8.98759e-54					YML118W
	YER110C	2207.39	-1.81498	2.00374e-51		YER150W	664.655	-0.0307957	0.873375								YDL066W	7171.41	-1.36918	2.46932e-169		YDL066W	7171.41	-1.03478	2.40211e-105					YPL011C
	YER111C	57.8934	1.23599	0.00114753		YER151C	309.972	-0.437034	0.0273125								YDL065C	1474.98	-0.0545526	0.68064		YDL065C	1474.98	-0.0040541	0.97617					YPR055W
	YER112W	1064.89	-0.483709	0.00053928		YER152C	702.755	0.632766	3.1244e-05								YDL064W	1616.33	-0.426674	1.50206e-06		YDL064W	1616.33	-0.593555	2.36249e-12					YDR325W
	YER113C	689.741	-0.51345	0.000602743		YER153C	140.569	0.73844	0.00404211								YDL063C	3140.25	-0.678497	9.38409e-22		YDL063C	3140.25	-0.283498	4.24874e-05					YOR083W
	YER114C	773.768	-0.336585	0.0198505		YER154W	479.655	-0.255257	0.164027								YDL062W	15.4665	1.14559	0.172825		YDL062W	15.4665	-0.140527	0.875407					YBL089W
	YER115C	364.408	-0.241249	0.19624		YER155C	878.97	0.0126077	0.943517								YDL061C	3894.34	-0.40514	4.9044e-13		YDL061C	3894.34	-1.47062	2.80763e-158					YNL257C
	YER116C	349.269	0.91464	1.16152e-06		YER156C	3432.87	0.401514	0.000975719								YDL060W	4955.15	-0.584031	1.94558e-24		YDL060W	4955.15	-0.360368	9.73231e-11					YGL117W
	YER117W	66579.4	-0.918895	2.95785e-17		YER157W	174.663	0.0954844	0.724886								YDL059C	448.865	-0.0288935	0.857651		YDL059C	448.865	0.423157	0.00127545					YDR506C
	YER118C	472.76	-0.403276	0.0171961		YER158C	283.786	1.07711	5.94381e-09								YDL058W	4692.01	-0.997118	3.30863e-65		YDL058W	4692.01	0.00931992	0.884512					YOR292C
	YER119C	257.003	-0.268248	0.183238		YER159C	1059.17	0.161381	0.32103								YDL057W	625.804	0.589096	3.57568e-06		YDL057W	625.804	0.867945	3.30257e-13					YOR160W
	YER120W	8790.69	-0.929169	2.14124e-17		YER160C	135.789	-0.411935	0.135265								YDL056W	3134.64	0.0353468	0.640819		YDL056W	3134.64	0.690089	4.49895e-27					YDR391C
	YER121W	137.592	3.11576	2.65633e-24		YER161C	490.211	0.171108	0.368815								YDL055C	17901.9	-0.425626	1.96253e-15		YDL055C	17901.9	-0.826023	1.63433e-55					YML049C
	YER122C	1680.27	-0.365117	0.00440653		YER162C	52.8882	-0.0602288	0.897511								YDL054C	2486.76	0.142576	0.0727102		YDL054C	2486.76	-0.0459666	0.567617					YGR270W
	YER123W	831.053	0.39589	0.0221955		YER163C	817.412	-0.299425	0.054531								YDL053C	1918.92	0.00467545	0.961932		YDL053C	1918.92	-0.144765	0.0723615					YML007W
	YER124C	3205.09	0.330827	0.00960267		YER164W	426.468	-0.0829749	0.687286								YDL052C	4386.16	-0.23973	0.000489399		YDL052C	4386.16	-0.386644	4.64122e-09					YBL080C
	YER125W	1566.33	-0.386602	0.00238358		YER165W	10756.1	0.503992	8.13088e-06								YDL051W	3807.07	-0.374775	1.55811e-10		YDL051W	3807.07	-0.588091	1.70372e-25					YDR490C
	YER126C	1065.03	-0.553492	8.36251e-05		YER166W	935.178	0.248528	0.124978								YDL050C	2.12314	0.263417	0.916627		YDL050C	2.12314	-0.550563	0.812212					YML087C
	YER127W	482.029	0.0544319	0.759073		YER167W	451.424	0.129205	0.505333								YDL049C	504.824	-0.168656	0.230563		YDL049C	504.824	0.222683	0.0794806					YHR199C
	YER128W	370.618	0.474764	0.00798325		YER168C	385.986	-0.064158	0.760983								YDL048C	7635.21	-1.24122	5.0085e-102		YDL048C	7635.21	-1.43983	5.18977e-142					YOR250C
	YER129W	395.41	0.107187	0.581409		YER169W	182.371	0.426479	0.0688378								YDL047W	3070.72	0.231322	0.000750605		YDL047W	3070.72	0.249446	0.000160078					YMR317W
	YER130C	1780.5	-1.35649	1.31285e-28		YER170W	267.288	-0.0860082	0.712904								YDL046W	7037.95	-0.160934	0.00232296		YDL046W	7037.95	-1.28163	3.63085e-142					YIL152W
	YER131W	28986.3	-1.26759	4.76782e-26		YER171W	290.552	0.0339971	0.89128								YDL045W-A	1387.25	0.0313831	0.756752		YDL045W-A	1387.25	-0.165591	0.0608136					YFL024C
	YER132C	462.665	-0.68115	4.00747e-05		YER172C	338.308	-0.184507	0.389515								YDL045C	1776.64	-0.127719	0.105839		YDL045C	1776.64	-0.0111366	0.891484					YOL116W
	YER133W	2814.74	-0.748118	1.67701e-10		YER173W	222.222	-0.687553	0.00126006								YDL044C	1181.79	0.623549	1.42476e-11		YDL044C	1181.79	1.32318	6.02112e-53					YCR075C
	YER134C	784.953	0.232061	0.116613		YER174C	877.907	0.19366	0.220074								YDL043C	909.814	0.0947382	0.404645		YDL043C	909.814	0.315235	0.00176955					YBL034C
	YER136W	670.312	-0.55689	0.000118027		YER175C	186.158	-1.30287	1.00453e-08								YDL042C	2092.54	-0.568298	9.36632e-15		YDL042C	2092.54	0.100473	0.169697					YGR004W
	YER137C	437.8	1.31626	2.58816e-15		YER175W-A	16.2477	-7.22324	1.23361e-05								YDL041W	28.2767	0.993792	0.0841231		YDL041W	28.2767	-0.402528	0.49982					YDR503C
	YER138W-A	42.6708	-0.842869	0.0413153		YER176W	353.568	0.234812	0.252768								YDL040C	6330.22	-0.362503	4.66744e-12		YDL040C	6330.22	-0.3892	1.99849e-14					YPL111W
	YER139C	339.628	0.930204	1.12054e-07		YER177W	9906.67	0.316532	0.00812313								YDL039C	5285.24	-2.74905	0		YDL039C	5285.24	-2.51566	1.7383e-296					YOR245C
	YER140W	240.272	-0.328153	0.108668		YER178W	2638.48	0.698638	1.36094e-08								YDL037C	2259.85	-3.99444	0		YDL037C	2259.85	-4.13217	0					YPR119W
	YER141W	2016.78	-0.0877572	0.526766		YER180C-A	482.861	-1.43653	2.80815e-19								YDL036C	1349.66	-0.577569	4.46873e-11		YDL036C	1349.66	-0.188715	0.0272499					YGR247W
	YER142C	258.433	-0.210543	0.306092		YER181C	116.59	-0.754239	0.0140589								YDL035C	3709.23	-0.662846	1.68416e-29		YDL035C	3709.23	0.038714	0.524625					YMR032W
	YER143W	301.905	0.0776055	0.707728		YER182W	594.251	-0.154626	0.400488								YDL034W	7.86123	0.353113	0.801498		YDL034W	7.86123	1.6577	0.156752					YER170W
	YER144C	839.368	0.171612	0.26464		YER183C	370.594	-0.794767	0.000135712								YDL032W	29.2038	3.45118	5.55968e-07		YDL032W	29.2038	1.23581	0.0883867					YNL046W
	YER145C	1071.68	0.00508949	0.973395		YER184C	198.649	-0.772523	0.000440014								YDL031W	4868.76	-0.778385	7.69053e-42		YDL031W	4868.76	-0.52207	5.53384e-21					YOR047C
	YER146W	2777.61	-1.04524	4.3048e-15		YER185W	13.0896	7.38345	1.22664e-05								YDL030W	1449.23	-0.465115	9.93393e-08		YDL030W	1449.23	0.208736	0.0126963					YLR145W
	YER147C	178.265	0.381102	0.0941566		YER186C	369.288	-0.747961	2.04833e-05								YDL029W	4566.03	0.117294	0.0486955		YDL029W	4566.03	-0.422373	2.6108e-14					YDR049W
	YER148W	2207.67	-0.971326	3.26236e-14		YER187W	26.1867	0.96602	0.0764989								YDL028C	2439.07	0.00749828	0.934828		YDL028C	2439.07	0.946461	4.47794e-40					YKL020C
	YER149C	253.033	-0.312193	0.134661		YER188W	70.4413	0.719134	0.033055								YDL027C	1984.7	0.33275	1.383e-05		YDL027C	1984.7	0.400975	3.93583e-08					YHR198C
	YER150W	1149.08	1.30426	5.48024e-23		YFL001W	525.245	-0.0323873	0.873375								YDL026W	32.4145	0.606441	0.261233		YDL026W	32.4145	0.184301	0.732181					YNL172W
	YER151C	335.032	0.607704	0.000886072		YFL002C	344.099	0.100123	0.638973								YDL025C	2619.88	0.669558	3.13652e-23		YDL025C	2619.88	0.769448	3.67154e-32					YBR172C
	YER152C	769.641	-0.343404	0.0176829		YFL002W-A	721.841	2.08208	5.45779e-46								YDL025W-A	23.6605	-0.208514	0.743019		YDL025W-A	23.6605	-1.41686	0.0125017					YMR231W
	YER153C	243.165	0.802249	5.10804e-05		YFL004W	1040.36	1.26595	5.61101e-21								YDL024C	352.247	0.501559	0.00832036		YDL024C	352.247	0.609211	0.000498339					YAR018C
	YER154W	482.715	0.252532	0.133234		YFL005W	3354.15	0.113167	0.439723								YDL022C-A	21.9723	1.22402	0.091844		YDL022C-A	21.9723	0.243978	0.747494					YPL092W
	YER155C	906.474	0.0537606	0.728661		YFL007W	638.244	-0.385765	0.0224602								YDL023C	36.0536	0.0194747	0.975235		YDL023C	36.0536	-0.752339	0.192796					YMR299C
	YER156C	3065.71	-0.843813	5.53749e-13		YFL008W	194.79	-0.0819171	0.758034								YDL022W	6740.76	0.764721	1.65202e-46		YDL022W	6740.76	-0.0182297	0.760404					YLR424W
	YER157W	136.86	-0.985275	6.12796e-05		YFL009W	463.971	0.0533155	0.790432								YDL021W	398.714	1.4136	1.54754e-15		YDL021W	398.714	0.142649	0.459884					YGR221C
	YER158C	236.153	-2.20288	2.11695e-27		YFL010C	3772.38	-0.0463879	0.753134								YDL020C	5546.07	0.947252	1.06106e-69		YDL020C	5546.07	1.26943	1.71817e-130					YIL112W
	YER159C	1643.62	0.938961	4.78261e-13		YFL011W	70.0055	-2.29925	2.89949e-10								YDL019C	5424.11	-0.848905	6.8247e-35		YDL019C	5424.11	-0.670404	2.76891e-23					YEL004W
	YER160C	202.675	1.29699	2.93981e-09		YFL012W	84.7499	1.22757	4.85683e-05								YDL018C	1657.57	0.111023	0.202577		YDL018C	1657.57	-0.081416	0.332107					YOL025W
	YER161C	545.956	0.119595	0.477123		YFL013C	113.72	-0.814683	0.00272931								YDL017W	891.564	0.186976	0.0928707		YDL017W	891.564	0.529932	1.27466e-07					YBR102C
	YER162C	64.485	0.556617	0.105085		YFL014W	2020.36	-2.91872	2.71377e-116								YDL016C	602.943	-0.284928	0.0224075		YDL016C	602.943	-1.01335	3.25741e-18					YPL224C
	YER163C	929.062	0.599879	2.4213e-05		YFL016C	447.072	-0.290642	0.11979								YDL015C	6804.97	-0.249232	3.1404e-06		YDL015C	6804.97	-0.921607	1.75102e-71					YLR353W
	YER164W	404.595	-0.091023	0.651832		YFL017C	1211.14	0.375657	0.00925964								YDL014W	11137.3	-0.220777	0.0011746		YDL014W	11137.3	-1.20886	1.72185e-76					YLR443W
	YER165W	8784.41	-1.38829	1.54508e-33		YFL017W-A	638.363	0.758936	1.19622e-06								YDL013W	2014.09	-0.147487	0.0595613		YDL013W	2014.09	0.689477	3.9074e-23					YDR231C
	YER166W	960.513	-0.18928	0.215781		YFL018C	609.544	0.494585	0.0018479								YDL012C	3473.71	0.036315	0.563648		YDL012C	3473.71	-0.641309	1.1318e-31					YDR423C
	YER167W	401.234	-0.538932	0.00170134		YFL021W	1026.76	-2.611	1.81002e-78								YDL011C	2.50946	1.06208	0.640522		YDL011C	2.50946	0.772908	0.722866					YPL040C
	YER168C	403.507	0.16606	0.34966		YFL022C	299.838	0.22365	0.284611								YDL010W	1268.94	0.133783	0.158551		YDL010W	1268.94	0.0141609	0.885218					YDR080W
	YER169W	195.178	-0.230113	0.309087		YFL023W	234.721	0.414139	0.0529418								YDL009C	31.8893	0.347964	0.549724		YDL009C	31.8893	0.358478	0.513799					YIL159W
	YER170W	322.658	0.554913	0.00183112		YFL024C	41.0268	1.36582	0.00173723								YDL008W	1039.17	-0.0713424	0.514026		YDL008W	1039.17	-0.413276	1.80399e-05					YDR478W
	YER171W	280.72	-0.159676	0.476904		YFL025C	487.316	0.324568	0.0851236								YDL007C-A	6.09054	2.50984	0.195059		YDL007C-A	6.09054	-0.478895	0.832151					YDL240W
	YER172C	383.188	0.487136	0.00446512		YFL026W	6689.68	0.49514	4.49971e-05								YDL007W	4243.08	-0.475118	1.95984e-13		YDL007W	4243.08	-0.554406	6.62667e-19					YNL167C
	YER173W	291.318	1.26066	1.03041e-11		YFL027C	144.521	-0.457859	0.0884657								YDL006W	1583.08	-0.293289	0.000199484		YDL006W	1583.08	0.241215	0.00108685					YJR060W
	YER174C	745.265	-0.787925	2.16912e-08		YFL028C	1156.68	-0.658352	1.06089e-06								YDL005C	1898.88	0.196202	0.0389682		YDL005C	1898.88	0.671487	1.44256e-14					YBL101C
	YER175C	177.93	1.19382	9.91652e-08		YFL029C	164.374	-0.135959	0.626743								YDL004W	3651.66	-0.281954	1.22027e-06		YDL004W	3651.66	-0.911274	4.17637e-60					YDL164C
	YER175W-A	32.7175	8.22167	1.22613e-07		YFL030W	38.4676	-0.106424	0.843575								YDL003W	3063.12	-0.16022	0.0209636		YDL003W	3063.12	0.6719	1.49046e-26					YLR284C
	YER176W	324.706	-0.544936	0.00194361		YFL031W	30428.3	-0.542989	7.1765e-06								YDL002C	1200.76	-0.113436	0.261519		YDL002C	1200.76	0.0646829	0.506539					YKR078W
	YER177W	9888.63	-0.347544	0.00307972		YFL033C	241.098	0.379446	0.0793505								YDL001W	1817.47	0.26674	0.000475871		YDL001W	1817.47	0.63426	4.25211e-19					YML117W
	YER178W	2248.46	-1.44707	1.44121e-31		YFL034C-A	10886.2	-0.216282	0.0800905								YDR001C	6222.55	0.714828	2.5098e-42		YDR001C	6222.55	0.260355	5.94629e-07					YNR066C
	YER180C-A	372.157	0.875869	2.24792e-07		YFL034C-B	167.167	0.553415	0.0228803								YDR002W	4178.06	-0.584875	1.0352e-23		YDR002W	4178.06	-1.29769	7.72719e-116					YGL216W
	YER181C	92.6379	0.158033	0.654458		YFL034W	217.877	0.0560917	0.826941								YDR003W	1472.3	0.828393	6.40479e-24		YDR003W	1472.3	0.647226	5.55267e-16					YLR283W
	YER182W	629.274	0.287113	0.0785259		YFL036W	715.396	-0.409662	0.00808753								YDR003W-A	506.731	0.618466	3.85661e-06		YDR003W-A	506.731	0.654419	2.88966e-07					YGL219C
	YER183C	257.121	-0.182587	0.474533		YFL037W	4320	0.859111	6.2171e-12								YDR004W	1369.61	0.349431	0.000666223		YDR004W	1369.61	0.955272	3.8179e-23					YCL029C
	YER184C	232.589	1.1025	9.59459e-08		YFL038C	2778.02	0.278477	0.0336902								YDR005C	2170.86	0.452714	4.73047e-11		YDR005C	2170.86	0.469023	1.50628e-12					YFR040W
	YER185W	89.2418	2.55953	1.93605e-13		YFL039C	16883.2	0.70975	8.11618e-10								YDR006C	6509.65	-0.165452	0.00298969		YDR006C	6509.65	0.0932859	0.0897751					YGR134W
	YER186C	343.225	0.556969	0.00228385		YFL041W	678.97	-0.28509	0.0781771								YDR007W	670.714	1.92735	1.22932e-61		YDR007W	670.714	1.27019	3.20468e-28					YBR055C
	YER187W	26.47	-0.953438	0.06064		YFL041W-A	123.849	-1.80456	4.91071e-10								YDR008C	145.394	1.47072	6.59162e-10		YDR008C	145.394	0.817501	0.00055825					YNL304W
	YER188C-A	16.1367	7.20215	7.02001e-06		YFL042C	132.768	-0.200419	0.493902								YDR009W	357.077	1.20649	1.07716e-13		YDR009W	357.077	1.3172	3.21819e-17
	YER188W	72.9041	-0.619647	0.0593969		YFL044C	1081.16	-0.993976	7.98764e-12								YDR010C	14.9498	2.61354	0.00241091		YDR010C	14.9498	1.45912	0.0935939
	YFL001W	420.72	-0.718452	1.52682e-05		YFL045C	21999.5	0.989437	4.17165e-20								YDR011W	17664.8	-0.0147507	0.777596		YDR011W	17664.8	-0.653814	3.01584e-49
	YFL002C	367.558	0.0690486	0.716166		YFL046W	591.712	-0.366492	0.0296901								YDR012W	27739.3	-0.622636	7.87963e-38		YDR012W	27739.3	-1.42965	9.16157e-196
	YFL002W-A	796.683	-1.49887	1.44984e-23		YFL047W	719.193	-0.193052	0.244761								YDR013W	715.626	0.640635	2.81101e-08		YDR013W	715.626	0.666007	1.9362e-09
	YFL004W	838.582	-2.91588	1.53882e-89		YFL048C	333.939	0.250057	0.202155								YDR014W	1330.35	0.582222	1.77379e-10		YDR014W	1330.35	1.0991	6.03916e-37
	YFL005W	2697.19	-0.899728	1.74344e-12		YFL049W	219.836	-0.37563	0.0895943								YDR014W-A	74.6276	0.0308017	0.947373		YDR014W-A	74.6276	0.155495	0.698729
	YFL007W	555.188	-0.0124956	0.948883		YFL050C	191.307	-2.04359	5.80801e-19								YDR016C	504.568	0.612074	3.00173e-06		YDR016C	504.568	0.128415	0.34487
	YFL008W	189.001	-0.0266473	0.91574		YFL052W	34.986	-8.32849	1.7685e-07								YDR017C	4075.57	-0.216433	0.000392176		YDR017C	4075.57	0.355576	6.35487e-10
	YFL009W	450.072	-0.167328	0.362378		YFL054C	52.6461	-1.3842	0.000602988								YDR018C	376.752	2.65728	2.65104e-48		YDR018C	376.752	2.029	1.70292e-29
	YFL010C	3942.56	0.148328	0.22785		YFL055W	8.41957	-6.27553	0.00032885								YDR019C	2426.69	1.83738	4.43953e-152		YDR019C	2426.69	1.58451	8.8469e-118
	YFL011W	275.534	4.47234	2.01249e-55		YFL064C	132.819	-0.406425	0.136673								YDR020C	1281.37	-0.0105702	0.919235		YDR020C	1281.37	0.438022	1.60483e-07
	YFL012W	99.0884	-0.608095	0.0296226		YFR001W	2606.95	0.169328	0.249993								YDR021W	1191.8	-0.443373	2.69473e-06		YDR021W	1191.8	0.053453	0.580855
	YFL013C	123.87	0.987295	0.000449537		YFR002W	869.028	-0.0877486	0.622665								YDR022C	535.499	0.38527	0.00301412		YDR022C	535.499	0.273994	0.0289053
	YFL014W	6110.78	4.62599	0		YFR003C	656.623	-0.0915243	0.617218								YDR023W	9274.07	-0.429142	1.30715e-14		YDR023W	9274.07	-0.922467	2.16099e-64
	YFL016C	599.401	0.969064	4.17899e-10		YFR004W	2080.84	0.0254013	0.877778								YDR024W	613.315	-0.0422419	0.761357		YDR024W	613.315	-0.670914	1.38307e-08
	YFL017C	1656.56	0.489265	0.000221932		YFR005C	507.889	-0.239736	0.188259								YDR025W	9192.73	-0.48982	6.15639e-19		YDR025W	9192.73	-1.20234	1.31145e-109
	YFL017W-A	663.063	-0.644989	2.30476e-05		YFR006W	57.1287	-9.03649	8.49296e-09								YDR026C	2353.63	0.196098	0.00592447		YDR026C	2353.63	0.566289	1.0053e-17
	YFL018C	609.779	-0.519577	0.000985633		YFR007W	392.154	-0.052583	0.80498								YDR027C	3024.31	-0.325836	5.4697e-07		YDR027C	3024.31	0.525207	5.29936e-18
	YFL020C	23.2726	7.73031	8.92997e-07		YFR008W	213.822	-1.08303	2.35747e-07								YDR028C	6655.7	-0.0604477	0.279626		YDR028C	6655.7	0.0066886	0.907858
	YFL021W	569.633	1.54277	8.8627e-24		YFR009W	821.825	-0.697449	1.14539e-06								YDR029W	8.09097	0.0302395	0.979012		YDR029W	8.09097	-0.279122	0.801861
	YFL022C	186.014	-2.80679	2.05714e-33		YFR010W	793.68	0.0809647	0.649422								YDR030C	579.402	0.237531	0.10683		YDR030C	579.402	0.471891	0.000462765
	YFL023W	241.73	-0.342453	0.0923383		YFR011C	1421.51	-0.223275	0.123269								YDR031W	625.76	0.667708	8.85864e-08		YDR031W	625.76	-0.0788897	0.553113
	YFL024C	89.5412	1.00884	0.000659437		YFR013W	227.724	-0.190033	0.458035								YDR032C	4101.36	0.0399003	0.54353		YDR032C	4101.36	-1.37897	5.28307e-123
	YFL025C	450.431	-0.621658	0.000138471		YFR014C	181.433	-0.0811127	0.766401								YDR033W	16743.4	-0.605957	1.05897e-34		YDR033W	16743.4	-1.2688	5.79768e-150
	YFL026W	4030.2	-5.50624	0		YFR015C	152.267	-2.08398	3.56469e-16								YDR034C	3663.77	0.264845	9.57546e-06		YDR034C	3663.77	0.686473	6.34185e-34
	YFL027C	96.5916	-0.794988	0.00632994		YFR016C	209.879	0.208159	0.394204								YDR034C-D	7557.66	-0.346711	1.47869e-07		YDR034C-D	7557.66	-1.04379	2.15969e-59
	YFL028C	1066.97	0.443673	0.00111824		YFR017C	226.59	-2.37774	3.4745e-27								YDR034C-C	1042.14	-0.304143	0.236546		YDR034C-C	1042.14	-1.4206	2.15262e-09
	YFL029C	179.808	0.354648	0.131799		YFR018C	1198.03	0.810727	1.89267e-09								YDR034W-B	293.481	2.88964	1.88483e-29		YDR034W-B	293.481	0.0851446	0.78196
	YFL030W	47.366	0.6224	0.113779		YFR019W	154.638	-0.162953	0.552386								YDR035W	5714.02	-0.12089	0.0488887		YDR035W	5714.02	-0.494604	5.04923e-18
	YFL031W	18396.1	-1.07718	2.34938e-19		YFR020W	423.512	-1.23093	3.25129e-13								YDR037W	12590	-0.382054	8.87778e-13		YDR037W	12590	-0.962424	1.36099e-75
	YFL033C	278.638	0.0415658	0.842823		YFR021W	561.583	-0.541738	0.000583559								YDR038C	4674.85	-0.500976	1.94196e-16		YDR038C	4674.85	-0.33945	1.05654e-08
	YFL034C-A	12280.4	0.506043	4.94135e-06		YFR022W	471.277	-0.367586	0.0422407								YDR039C	2660.23	-0.0355886	0.64161		YDR039C	2660.23	-0.399718	1.28384e-09
	YFL034C-B	198.015	-0.0336879	0.889158		YFR024C-A	256.055	0.170522	0.446209								YDR040C	10875.6	0.088795	0.135814		YDR040C	10875.6	-0.252844	5.3287e-06
	YFL034W	272.744	0.523389	0.005589		YFR025C	149.361	0.0829156	0.779312								YDR041W	1661.65	0.136417	0.117865		YDR041W	1661.65	0.00349802	0.970298
	YFL036W	570.503	-0.246904	0.134622		YFR026C	10.3039	-6.56716	0.000126359								YDR042C	279.288	-0.614223	0.00131562		YDR042C	279.288	-0.828923	3.11437e-06
	YFL037W	3938.8	-1.309	1.63371e-29		YFR027W	85.4079	-0.873747	0.00796827								YDR043C	2322.09	0.294323	4.35489e-05		YDR043C	2322.09	1.11739	7.95222e-64
	YFL038C	2989.66	-0.076508	0.568315		YFR028C	239.639	-0.209136	0.35723								YDR044W	3640.12	-0.401969	2.20553e-12		YDR044W	3640.12	-0.635748	3.5329e-31
	YFL039C	15844.8	-0.99757	3.19134e-20		YFR029W	124.823	-0.372505	0.200653								YDR045C	1081.13	0.0264817	0.8001		YDR045C	1081.13	-0.294119	0.000920828
	YFL041W	448.347	-1.13914	9.09003e-13		YFR030W	562.63	0.0751412	0.721045								YDR046C	9658.17	0.264751	3.02005e-07		YDR046C	9658.17	-0.318966	3.25051e-10
	YFL041W-A	104.22	1.45724	2.37919e-06		YFR031C	165.764	-0.460996	0.0674708								YDR047W	2879.65	0.0476394	0.608645		YDR047W	2879.65	-0.154444	0.0680815
	YFL042C	183.749	0.962185	1.2187e-05		YFR031C-A	20453.5	0.136177	0.305401								YDR048C	25.2026	2.1425	0.00278172		YDR048C	25.2026	0.477694	0.536109
	YFL044C	831.365	0.359704	0.0256186		YFR032C-A	26459.6	1.95978	6.85735e-54								YDR049W	2167.83	0.0546651	0.496548		YDR049W	2167.83	0.495572	9.7063e-13
	YFL045C	21544.2	-1.11585	9.01625e-24		YFR033C	2814.23	0.0954321	0.571834								YDR050C	16062	-0.532519	2.95955e-25		YDR050C	16062	-1.52843	2.2782e-200
	YFL046W	478.697	-0.255692	0.118985		YFR034C	760.68	-0.416473	0.00557898								YDR051C	2299.62	-0.216303	0.00692571		YDR051C	2299.62	0.00052317	0.995362
	YFL047W	637.499	-0.175764	0.306777		YFR034W-A	32.6884	-0.530566	0.310275								YDR052C	3642.06	-0.110069	0.0899084		YDR052C	3642.06	0.512242	1.95892e-18
	YFL048C	319.526	-0.418896	0.0197919		YFR035C	11.4371	7.18458	2.92385e-05								YDR053W	9.6655	-0.288262	0.792158		YDR053W	9.6655	0.0273788	0.978969
	YFL049W	375.74	1.53508	1.4854e-18		YFR036W	368.182	-0.287073	0.140322								YDR054C	3696.85	-0.0445569	0.52842		YDR054C	3696.85	0.363675	3.20561e-09
	YFL050C	226.962	2.32978	3.4795e-26		YFR037C	1024.03	0.360796	0.0120865								YDR055W	14231.3	0.83394	1.90143e-78		YDR055W	14231.3	-0.0874565	0.0594558
	YFL052W	137.074	10.2886	9.30181e-12		YFR038W	403.342	-0.107806	0.599261								YDR056C	2419.8	-0.602958	5.26659e-16		YDR056C	2419.8	-0.757853	2.40065e-26
	YFL054C	83.7356	2.23822	1.50795e-11		YFR039C	320.156	0.129807	0.542202								YDR057W	2012.56	-0.186948	0.0197538		YDR057W	2012.56	0.187769	0.0127316
	YFL055W	60.1413	9.10017	2.67061e-09		YFR040W	323.744	0.839719	8.31677e-06								YDR058C	515.154	1.0023	9.74509e-14		YDR058C	515.154	0.946836	2.27283e-13
	YFL060C	9.22185	6.39491	0.000131458		YFR041C	482.813	0.451566	0.00753225								YDR059C	1626.98	0.971117	3.12587e-32		YDR059C	1626.98	-0.199317	0.0186742
	YFL061W	9.83312	6.48793	0.000119974		YFR042W	1511.34	-0.170597	0.330062								YDR060W	9141.96	-0.685966	1.04933e-42		YDR060W	9141.96	-0.391706	1.51921e-15
	YFL062W	20.3356	7.53571	1.92198e-06		YFR043C	91.0568	0.00619469	0.988301								YDR061W	2253.22	-0.184752	0.021218		YDR061W	2253.22	0.0101582	0.905088
	YFL064C	348.7	2.33739	5.8107e-36		YFR044C	3683.37	0.629421	4.35268e-07								YDR062W	6157.5	-0.761037	2.07189e-57		YDR062W	6157.5	-0.833147	5.86679e-73
	YFR001W	2570.61	-0.237117	0.0789644		YFR045W	466.006	-0.545578	0.00124227								YDR063W	1535.61	-0.308506	0.000260297		YDR063W	1535.61	-0.322043	5.55423e-05
	YFR002W	798.691	-0.18233	0.247093		YFR046C	151.533	-0.448478	0.084368								YDR064W	10262.8	-0.539472	6.58861e-26		YDR064W	10262.8	-1.25608	2.7281e-137
	YFR003C	725.22	0.337417	0.0302357		YFR047C	556.261	-0.0486567	0.808542								YDR065W	1003.05	0.359797	0.000486863		YDR065W	1003.05	0.832132	5.71761e-18
	YFR004W	2072.63	-0.0596963	0.670166		YFR048W	309.455	-0.266951	0.20782								YDR066C	385.155	0.171257	0.276077		YDR066C	385.155	0.186923	0.201398
	YFR005C	534.545	0.354238	0.0268653		YFR049W	962.006	0.0684922	0.737798								YDR067C	1085.88	0.395364	0.00015686		YDR067C	1085.88	0.63589	1.18147e-10
	YFR006W	18.8713	7.42785	2.94513e-06		YFR050C	2427.53	0.0372963	0.808898								YDR068W	1717.62	0.0127935	0.915582		YDR068W	1717.62	0.229846	0.0224598
	YFR007W	351.598	-0.299113	0.132064		YFR051C	1838.52	0.590023	4.54163e-06								YDR069C	2211.11	0.590027	3.72334e-16		YDR069C	2211.11	0.983967	7.56326e-46
	YFR008W	236.378	1.27559	2.51819e-10		YFR052W	3412.92	-0.0836997	0.558454								YDR070C	492.973	0.796792	7.02501e-07		YDR070C	492.973	0.289192	0.0718452
	YFR009W	636.105	0.0195993	0.910007		YFR053C	2824.26	-2.16437	5.47711e-73								YDR071C	3491.93	-0.17322	0.00572643		YDR071C	3491.93	-0.79864	1.02236e-41
	YFR010W	836.556	0.0495737	0.772333		YFR055W	2281.08	0.0943985	0.552548								YDR072C	4910.04	-0.0597212	0.362145		YDR072C	4910.04	-0.130875	0.029899
	YFR011C	1250.75	-0.164153	0.234343		YGL001C	1558.91	0.311119	0.0232732								YDR073W	1208.46	0.62119	2.07732e-11		YDR073W	1208.46	0.628811	2.61031e-12
	YFR013W	212.447	-0.0274012	0.914805		YGL002W	1952.07	-0.380737	0.00331348								YDR074W	7724.79	0.772256	2.04654e-62		YDR074W	7724.79	0.315441	7.26414e-12
	YFR014C	156.463	-0.393393	0.0978781		YGL003C	316.494	-0.282799	0.161151								YDR075W	1965.41	-0.390902	9.88902e-07		YDR075W	1965.41	0.0580827	0.480272
	YFR015C	232.362	2.79387	4.88944e-35		YGL004C	309.341	0.0654625	0.773569								YDR076W	504.435	0.920095	3.32732e-12		YDR076W	504.435	1.45222	3.65358e-31
	YFR016C	218.08	-0.114161	0.615822		YGL005C	367.393	-0.282847	0.139491								YDR077W	80554.3	0.69812	4.17814e-46		YDR077W	80554.3	-0.873295	1.05261e-71
	YFR017C	677.974	4.11903	1.78713e-100		YGL006W	307.181	0.252202	0.213255								YDR078C	293.144	0.764964	9.73092e-06		YDR078C	293.144	0.942582	9.76011e-09
	YFR018C	2133.07	0.827799	3.81344e-11		YGL007C-A	192.068	-0.47217	0.045903								YDR079W	814.466	-0.117115	0.33004		YDR079W	814.466	-0.482665	6.29493e-06
	YFR019W	192.367	0.692276	0.00128653		YGL008C	25781.7	0.56855	0.180737								YDR079C-A	575.571	0.0956925	0.463272		YDR079C-A	575.571	-0.646696	2.47554e-08
	YFR020W	566.372	1.78257	4.70038e-28		YGL009C	5073.49	0.847459	3.00417e-12								YDR080W	2265.83	-0.0544778	0.471832		YDR080W	2265.83	0.487689	4.7722e-14
	YFR021W	438.445	-0.147839	0.402842		YGL010W	480.175	-0.955723	1.33071e-06								YDR081C	2682.63	-0.407802	3.79437e-09		YDR081C	2682.63	0.451605	4.01749e-12
	YFR022W	599.091	0.918972	3.55351e-09		YGL011C	3225.16	0.103353	0.473257								YDR082W	1568.21	1.34849	6.70999e-64		YDR082W	1568.21	1.5241	1.05042e-85
	YFR024C-A	278.841	0.0580705	0.782829		YGL012W	3757.19	0.537259	5.02645e-05								YDR083W	2874.12	-0.533124	1.94555e-14		YDR083W	2874.12	-0.445068	3.5578e-11
	YFR025C	139.512	-0.319105	0.196601		YGL013C	271.622	-0.157196	0.491171								YDR084C	1516.57	0.02917	0.789073		YDR084C	1516.57	-0.546391	3.27133e-09
	YFR026C	19.0944	7.44463	2.97008e-06		YGL014W	950.262	0.106738	0.568966								YDR085C	1925.07	0.874789	1.01842e-30		YDR085C	1925.07	1.01147	6.81496e-44
	YFR027W	127.01	1.66643	1.10754e-10		YGL016W	649.014	-0.124289	0.486346								YDR086C	3023.71	-0.455641	2.61452e-13		YDR086C	3023.71	-1.15919	2.91475e-82
	YFR028C	260.753	0.40873	0.0362917		YGL017W	319.404	0.17866	0.387867								YDR087C	2605.84	-0.425678	4.61103e-10		YDR087C	2605.84	-0.53249	3.94523e-16
	YFR029W	136.279	0.573524	0.0235493		YGL018C	228.071	-0.78124	0.000146183								YDR088C	1097.08	-0.0224476	0.845605		YDR088C	1097.08	0.424511	7.02718e-06
	YFR030W	525.627	-0.308433	0.0610165		YGL019W	2618.25	-0.243274	0.0708469								YDR089W	3316.9	0.357921	5.54401e-08		YDR089W	3316.9	1.2195	5.18416e-86
	YFR031C	153.71	0.246016	0.310865		YGL020C	1900.17	0.572923	9.60104e-06								YDR090C	1535.88	0.229553	0.00735437		YDR090C	1535.88	0.243233	0.00291681
	YFR031C-A	15425.4	-1.21915	7.13891e-28		YGL021W	289.368	-0.173172	0.431864								YDR091C	8616.95	-0.331651	6.48788e-10		YDR091C	8616.95	-0.37181	1.25401e-12
	YFR032C-A	27493.7	-1.75419	5.57165e-44		YGL022W	318.1	0.566816	0.00452607								YDR092W	2030.8	0.0350583	0.679724		YDR092W	2030.8	-0.303034	3.61619e-05
	YFR033C	2651.19	-0.3048	0.0257858		YGL023C	489.08	-0.524048	0.00154023								YDR093W	8653.96	-0.789413	9.48525e-48		YDR093W	8653.96	-0.409374	2.0063e-14
	YFR034C	963.67	0.952772	3.10241e-12		YGL025C	215.914	-0.0781854	0.763008								YDR094W	1021.72	-1.16384	9.47027e-31		YDR094W	1021.72	-0.99116	3.5985e-25
	YFR034W-A	101.337	2.71352	2.59645e-17		YGL026C	1881.99	-0.0565906	0.727722								YDR095C	10.3281	-2.30354	0.021236		YDR095C	10.3281	-3.08383	0.00103953
	YFR035C	27.0404	0.457536	0.445838		YGL027C	1385.63	0.523341	0.000109302								YDR096W	4601.42	0.221011	0.00018627		YDR096W	4601.42	0.545805	1.51676e-22
	YFR036W	478.392	0.89654	1.55949e-08		YGL028C	2757.48	-0.157086	0.245717								YDR097C	3870.47	-0.352594	8.80961e-08		YDR097C	3870.47	0.109847	0.0944593
	YFR037C	1012.46	-0.42446	0.00421246		YGL029W	992.394	0.303787	0.0619618								YDR098C	3404.67	-0.322589	8.1311e-07		YDR098C	3404.67	-0.696373	1.23325e-28
	YFR038W	394.467	0.0233069	0.909675		YGL030W	10703.1	1.36424	6.045e-18								YDR098C-B	3854.66	-1.17332	7.58894e-05		YDR098C-B	3854.66	-2.14169	1.43509e-13
	YFR039C	296.847	-0.393482	0.0352583		YGL031C	23212	0.677713	4.02069e-09								YDR098C-A	731.433	-1.40236	0.000759812		YDR098C-A	731.433	-2.48348	9.20912e-10
	YFR040W	377.515	-0.316412	0.092083		YGL032C	2114.47	0.511199	7.3097e-05								YDR099W	8491.43	-0.334043	1.77682e-08		YDR099W	8491.43	-0.817315	1.34362e-45
	YFR041C	562.788	0.00332151	0.98485		YGL035C	302.22	-0.277581	0.216989								YDR101C	6254.07	-0.347319	8.71395e-13		YDR101C	6254.07	-0.330307	2.22714e-12
	YFR042W	1570.77	0.254595	0.116175		YGL036W	160.834	0.425082	0.0828603								YDR102C	52.5357	-0.354167	0.424359		YDR102C	52.5357	1.05473	0.00500116
	YFR043C	98.4214	0.187775	0.562049		YGL037C	2906.25	0.0707257	0.641935								YDR103W	4152.56	-0.253124	3.32411e-05		YDR103W	4152.56	0.455723	1.96035e-15
	YFR044C	3450.53	-0.914261	5.12717e-15		YGL038C	484.179	0.0728676	0.712731								YDR104C	1513.51	0.0117877	0.906024		YDR104C	1513.51	0.781216	1.51735e-23
	YFR045W	443.139	0.402118	0.018204		YGL039W	374.796	0.225161	0.243798								YDR105C	3711.15	-0.0570214	0.451768		YDR105C	3711.15	-0.206609	0.00253259
	YFR046C	167.525	0.672077	0.00273103		YGL040C	1109.48	0.0491269	0.77088								YDR106W	148.863	0.51765	0.0362577		YDR106W	148.863	0.488957	0.0369675
	YFR047C	593.061	0.205001	0.2162		YGL041C	13.2878	7.40755	1.06593e-05								YDR107C	1329.32	-0.485661	3.1249e-06		YDR107C	1329.32	-0.0826569	0.436953
	YFR048W	275.606	-0.077178	0.714372		YGL041W-A	444.748	0.0850564	0.673347								YDR108W	1749.02	0.203092	0.0121547		YDR108W	1749.02	1.02909	7.6647e-45
	YFR049W	812.076	-0.651515	0.000233308		YGL043W	1362.94	-0.640938	2.99647e-05								YDR109C	1353.91	0.422837	7.85406e-07		YDR109C	1353.91	0.785944	1.91239e-22
	YFR050C	2260.53	-0.277926	0.0400011		YGL044C	314.973	0.0169183	0.942036								YDR110W	1689.51	-0.69075	3.05851e-19		YDR110W	1689.51	0.34678	1.36825e-06
	YFR051C	2064.32	-0.226331	0.0817841		YGL045W	30.9841	0.250334	0.677644								YDR111C	1571.1	0.505117	8.3723e-10		YDR111C	1571.1	0.209787	0.0104766
	YFR052W	3012.43	-0.314519	0.0102375		YGL047W	453.969	-0.0783727	0.707121								YDR112W	6.54942	0.73812	0.554898		YDR112W	6.54942	-0.191122	0.879963
	YFR053C	3428.28	2.48676	7.13898e-99		YGL048C	2603.97	0.00918849	0.952928								YDR113C	1404.13	0.232623	0.0102907		YDR113C	1404.13	0.68941	1.18934e-16
	YFR055W	2682.23	0.333108	0.00780315		YGL049C	279.831	0.0916576	0.692727								YDR114C	8.97354	0.689861	0.523646		YDR114C	8.97354	0.182797	0.865477
	YGL001C	1545.18	-0.364585	0.00494653		YGL050W	1083.52	-0.0860245	0.593778								YDR115W	1628.78	0.19801	0.0199913		YDR115W	1628.78	-0.270809	0.000815851
	YGL002W	1966.69	0.380491	0.00243542		YGL051W	25.7805	0.231546	0.726107								YDR116C	2072.67	-0.0487992	0.529478		YDR116C	2072.67	0.154385	0.0241697
	YGL003C	419.369	0.936676	2.6064e-08		YGL053W	233.373	0.371655	0.100982								YDR117C	2203.26	-0.178275	0.0167702		YDR117C	2203.26	0.0684235	0.35302
	YGL004C	308.974	-0.09189	0.647911		YGL054C	5674.19	-0.732661	9.97504e-08								YDR118W	1335.31	0.211397	0.0224234		YDR118W	1335.31	1.14353	2.93236e-43
	YGL005C	386.407	0.393117	0.027168		YGL055W	9480.23	0.682572	3.83665e-07								YDR118W-A	111.837	0.0844232	0.787361		YDR118W-A	111.837	0.988576	9.05399e-05
	YGL006W	322.226	-0.1283	0.515912		YGL056C	478.196	0.183942	0.439291								YDR119W	7531.24	-0.72995	4.69761e-38		YDR119W	7531.24	-0.320547	8.39988e-09
	YGL007C-A	278.948	1.28961	4.7277e-11		YGL057C	387.372	-0.0846318	0.69249								YDR119W-A	635.298	2.1062	2.18831e-51		YDR119W-A	635.298	1.2744	3.92211e-20
	YGL008C	20683.2	-1.58872	1.27695e-25		YGL058W	1734.14	-0.272067	0.0542402								YDR120C	3368.51	-0.803938	7.57915e-38		YDR120C	3368.51	-0.513061	1.19083e-17
	YGL009C	5800.37	-0.385579	0.00183227		YGL059W	300.427	-0.4411	0.0373754								YDR121W	1714.07	-0.048255	0.560714		YDR121W	1714.07	-0.277081	0.000125684
	YGL010W	772.194	1.88607	1.26792e-24		YGL060W	272.495	0.274208	0.193317								YDR122W	4629.54	0.342228	9.24102e-08		YDR122W	4629.54	0.378271	1.12277e-09
	YGL011C	3121.09	-0.227139	0.062881		YGL061C	341.193	0.161288	0.45906								YDR123C	1831.22	0.593194	1.29313e-15		YDR123C	1831.22	1.02447	1.39042e-47
	YGL012W	3550.6	-0.7755	2.58312e-11		YGL062W	493.054	0.129345	0.502969								YDR124W	614.214	1.81959	1.93044e-49		YDR124W	614.214	1.46974	4.87486e-34
	YGL013C	254.178	-0.0531383	0.808023		YGL063W	227.079	-0.83909	0.0002158								YDR125C	741.791	1.0446	3.63728e-21		YDR125C	741.791	0.964463	2.76103e-19
	YGL014W	738.851	-1.03381	3.61927e-12		YGL064C	36.6234	-0.348545	0.501649								YDR126W	1303.31	0.741355	1.61914e-18		YDR126W	1303.31	0.428433	2.33918e-07
	YGL016W	440.381	-1.29544	3.67112e-16		YGL065C	578.226	0.211639	0.213696								YDR127W	15840.7	-0.0155567	0.775017		YDR127W	15840.7	-0.558256	1.91744e-33
	YGL017W	298.112	-0.425862	0.0200753		YGL066W	233.781	-0.0679049	0.792038								YDR128W	2894.03	-0.212093	0.00139735		YDR128W	2894.03	-0.0658064	0.326004
	YGL018C	256.198	1.02178	4.09131e-07		YGL067W	1163.54	0.0336747	0.854157								YDR129C	9282.56	-0.274313	1.27214e-08		YDR129C	9282.56	-0.639787	7.19771e-43
	YGL019W	2494.01	0.0896982	0.568289		YGL068W	3143.41	0.220904	0.265806								YDR130C	943.576	0.867629	8.06037e-19		YDR130C	943.576	1.16043	3.28351e-35
	YGL020C	2022.3	-0.384654	0.00258446		YGL070C	1562.9	-0.275667	0.0428697								YDR131C	1480.37	0.893004	3.52017e-25		YDR131C	1480.37	1.21268	1.78581e-48
	YGL021W	289.633	0.154705	0.450037		YGL071W	468.677	-0.223249	0.217589								YDR132C	1114.97	0.139726	0.160509		YDR132C	1114.97	0.279628	0.00208076
	YGL022W	310.098	-0.686939	0.000302916		YGL073W	243.337	0.229945	0.309047								YDR133C	10995.3	0.914683	1.44926e-67		YDR133C	10995.3	-0.365547	5.8099e-12
	YGL023C	449.419	0.290718	0.094275		YGL075C	103.279	-0.921877	0.00132771								YDR135C	14783.2	-0.570216	1.65666e-39		YDR135C	14783.2	-0.964587	1.44872e-113
	YGL025C	217.031	0.0705015	0.759183		YGL076C	33283.4	1.0512	2.39429e-18								YDR136C	28.0332	0.0920379	0.881073		YDR136C	28.0332	-1.4593	0.00664879
	YGL026C	1902.18	0.0652524	0.644971		YGL077C	1994.29	-0.230719	0.123823								YDR137W	2693.15	0.398593	1.60744e-10		YDR137W	2693.15	0.742576	3.38665e-36
	YGL027C	1194.25	-1.15036	2.77232e-18		YGL078C	912.271	0.55767	8.86985e-05								YDR138W	2434.49	-0.1003	0.23255		YDR138W	2434.49	0.710601	1.19474e-21
	YGL028C	3499.91	0.734705	4.3578e-09		YGL079W	902.886	-0.39462	0.006498								YDR139C	1270.75	-0.316134	0.000244725		YDR139C	1270.75	-0.936586	1.85354e-30
	YGL029W	934.684	-0.532216	0.000280057		YGL080W	1154.59	-0.239029	0.143714								YDR140W	1580.6	0.236886	0.00271384		YDR140W	1580.6	0.0471753	0.563034
	YGL030W	11762.3	-0.95751	1.19148e-08		YGL082W	288.133	-0.0273358	0.908018								YDR141C	5844.66	-0.00219665	0.97169		YDR141C	5844.66	0.127555	0.0200582
	YGL031C	19485.9	-1.49792	2.13064e-34		YGL083W	235.419	0.353498	0.101396								YDR142C	1587.14	-0.125987	0.134334		YDR142C	1587.14	0.707404	9.85063e-22
	YGL032C	1258.96	-7.5005	1.59474e-150		YGL084C	535.232	0.764365	1.30957e-06								YDR143C	5085.03	-0.403239	5.42567e-10		YDR143C	5085.03	0.315053	5.94819e-07
	YGL035C	354.608	0.654143	0.000596874		YGL085W	208.405	-0.505901	0.0223003								YDR144C	5659.57	-0.941741	5.71865e-78		YDR144C	5659.57	-0.369148	2.87149e-14
	YGL036W	247.816	0.73859	0.000139199		YGL087C	2318.7	-0.23512	0.0758067								YDR145W	4563.09	-0.137498	0.0287266		YDR145W	4563.09	0.192915	0.00110888
	YGL037C	3969.78	0.719563	5.08876e-09		YGL089C	41.2263	0.732968	0.125507								YDR146C	3511.03	-0.301484	1.09281e-05		YDR146C	3511.03	0.607797	2.07326e-21
	YGL038C	470.209	-0.184602	0.301247		YGL090W	330.26	-1.14683	8.4286e-10								YDR147W	1927.69	0.85261	3.08067e-28		YDR147W	1927.69	1.24979	3.56834e-63
	YGL039W	346.29	-0.511361	0.00336282		YGL091C	583.641	0.162708	0.36624								YDR148C	4175.05	-0.132498	0.0272545		YDR148C	4175.05	-0.465659	7.40581e-17
	YGL040C	925.806	-0.669931	9.46712e-07		YGL092W	654.727	0.191553	0.25056								YDR149C	5.10838	0.189572	0.903267		YDR149C	5.10838	-1.78191	0.222679
	YGL041C	13.3807	-7.42968	5.29742e-06		YGL093W	220.197	-0.158894	0.505286								YDR150W	7742.38	-0.850844	5.4171e-43		YDR150W	7742.38	-0.37604	6.90236e-10
	YGL041C-B	13.6231	6.95784	1.73847e-05		YGL094C	289.338	-0.178998	0.411331								YDR151C	2485.66	0.416276	8.75977e-09		YDR151C	2485.66	0.955864	3.42292e-44
	YGL041W-A	513.35	0.292724	0.0791181		YGL095C	758.171	-0.178772	0.273614								YDR152W	3008.9	-0.0920851	0.182584		YDR152W	3008.9	-0.179978	0.00460685
	YGL043W	1065.85	-0.019948	0.917388		YGL097W	515.063	0.701765	7.59864e-06								YDR153C	3403.44	-0.15192	0.0201892		YDR153C	3403.44	0.478776	1.18597e-15
	YGL044C	332.274	0.112868	0.575977		YGL098W	3648.52	1.25401	0.00122065								YDR154C	8764.72	-0.812175	9.88451e-44		YDR154C	8764.72	-1.79345	2.01571e-210
	YGL045W	52.4835	1.07441	0.00610439		YGL099W	438.198	0.720772	1.76021e-05								YDR155C	13913.1	-0.754494	3.68179e-42		YDR155C	13913.1	-1.73337	7.36274e-219
	YGL047W	381.551	-0.485094	0.00455795		YGL100W	1198.97	0.0539539	0.748778								YDR156W	4713.73	-0.0106399	0.88598		YDR156W	4713.73	-0.657566	7.17926e-27
	YGL048C	2418.07	-0.256496	0.0419098		YGL101W	1374.91	0.472826	0.000312								YDR157W	1506.53	-0.0225255	0.814928		YDR157W	1506.53	-0.735525	9.11721e-20
	YGL049C	210.79	-1.15409	2.37205e-08		YGL103W	64354.6	0.49028	0.00133562								YDR158W	7706.87	-0.28514	0.12521		YDR158W	7706.87	-1.15259	3.30135e-11
	YGL050W	843.448	-0.755154	5.72787e-08		YGL104C	248.566	0.486534	0.0203761								YDR159W	3535.59	-0.71131	7.89474e-34		YDR159W	3535.59	0.431227	3.71524e-15
	YGL051W	32.1429	0.374032	0.471055		YGL105W	7287.8	0.302365	0.0109558								YDR160W	2334.51	0.575022	3.46959e-16		YDR160W	2334.51	0.98285	8.26489e-48
	YGL053W	298.819	0.324591	0.106629		YGL106W	2079.91	-0.0673725	0.68521								YDR161W	2485.8	-0.559901	7.22469e-18		YDR161W	2485.8	-0.846955	4.52852e-42
	YGL054C	4798.93	0.303947	0.0388722		YGL107C	670.792	-0.407207	0.0172884								YDR162C	1506.19	0.378444	0.000255892		YDR162C	1506.19	0.313206	0.00185867
	YGL055W	8783.09	-1.0234	4.45348e-15		YGL108C	211.931	0.422719	0.0691393								YDR163W	1176.88	0.00503644	0.971123		YDR163W	1176.88	0.280014	0.0201386
	YGL056C	631.533	0.548471	0.00271629		YGL110C	133.127	0.410324	0.12789								YDR164C	2518.52	-0.15924	0.0184017		YDR164C	2518.52	-0.00286157	0.969126
	YGL057C	327.771	-0.453137	0.0109574		YGL111W	792.542	0.102827	0.542661								YDR165W	3115.01	-0.230663	0.00145507		YDR165W	3115.01	-0.190845	0.00665434
	YGL058W	1766.02	0.29955	0.0288422		YGL112C	636.878	0.00974482	0.958495								YDR167W	1238.44	-0.300294	0.00335008		YDR167W	1238.44	-0.439059	5.12976e-06
	YGL059W	368.059	0.899567	4.04599e-06		YGL113W	154.972	0.128408	0.663041								YDR168W	4640.94	-0.369722	7.1617e-10		YDR168W	4640.94	-0.318435	4.05859e-08
	YGL060W	231.883	-0.881205	6.52013e-06		YGL114W	468.9	-0.242663	0.171096								YDR169C	2881.77	0.220258	0.00280606		YDR169C	2881.77	0.566011	2.29103e-16
	YGL061C	386.948	0.177313	0.334604		YGL115W	1176.8	-0.0272418	0.87628								YDR169C-A	49.5357	1.20115	0.00710788		YDR169C-A	49.5357	1.95179	2.45669e-06
	YGL062W	453.43	-0.420394	0.0120031		YGL116W	116.614	-0.151155	0.62922								YDR170C	13009.4	-0.695798	6.30284e-46		YDR170C	13009.4	-0.727387	1.12536e-51
	YGL063C-A	22.6156	7.68932	1.16411e-06		YGL117W	669.254	-0.943457	4.45012e-10								YDR170W-A	1527.19	-0.358164	2.37637e-05		YDR170W-A	1527.19	-0.731419	1.45597e-19
	YGL063W	372.532	1.82345	6.25517e-25		YGL118C	25.4022	0.74611	0.189368								YDR171W	3687.56	1.30596	1.14706e-78		YDR171W	3687.56	0.881298	8.1385e-38
	YGL064C	36.0262	0.284886	0.554544		YGL119W	381.328	-0.0132867	0.955878								YDR172W	8831.98	-0.413621	1.05276e-16		YDR172W	8831.98	-0.464587	1.15217e-21
	YGL065C	489.855	-0.819252	1.3975e-07		YGL120C	1799.48	-0.167023	0.244761								YDR173C	566.811	0.425881	0.000735038		YDR173C	566.811	0.585744	7.58478e-07
	YGL066W	307.761	0.745551	5.88109e-05		YGL121C	348.165	-0.964902	8.16619e-08								YDR174W	4562.46	0.0988625	0.194227		YDR174W	4562.46	-0.107554	0.141528
	YGL067W	963.119	-0.680281	5.85558e-06		YGL122C	1275.76	-0.294616	0.0351055								YDR175C	2081.39	-0.0928269	0.21111		YDR175C	2081.39	0.0882378	0.202978
	YGL068W	2805.46	-0.62944	0.000506986		YGL123W	98968.8	0.293077	0.0176288								YDR176W	2259.33	-0.1742	0.0260769		YDR176W	2259.33	0.767734	1.4638e-27
	YGL069C	15.2981	7.12517	9.34324e-06		YGL124C	75.4842	-0.414698	0.246167								YDR177W	2692.65	0.0573435	0.401112		YDR177W	2692.65	-0.264712	1.29974e-05
	YGL070C	1651.45	0.39829	0.00199377		YGL125W	1267.04	-1.44304	2.47732e-23								YDR178W	3727.04	-0.134229	0.0660819		YDR178W	3727.04	-1.05304	2.86175e-54
	YGL071W	483.173	0.284132	0.0848249		YGL126W	1234.78	-0.282366	0.0586858								YDR179C	452.023	0.590801	0.000157254		YDR179C	452.023	0.588524	7.78328e-05
	YGL073W	342.709	0.669674	0.000172858		YGL127C	910.639	-0.737397	2.79651e-07								YDR179W-A	1148.47	-0.0548286	0.587462		YDR179W-A	1148.47	0.536549	2.9503e-10
	YGL075C	79.306	0.26973	0.404675		YGL128C	161.464	-0.902315	0.000319941								YDR180W	2371.39	-1.22062	4.96322e-69		YDR180W	2371.39	0.303192	2.09036e-06
	YGL076C	29281.5	-1.76291	4.25238e-38		YGL129C	486.958	-0.056535	0.777236								YDR181C	1215.13	0.232246	0.013782		YDR181C	1215.13	0.67559	4.56797e-15
	YGL077C	1519.16	-0.637101	1.38e-06		YGL130W	588.749	-0.0110215	0.9538								YDR182W	3945.38	-0.436559	7.03795e-14		YDR182W	3945.38	-0.501976	3.4724e-19
	YGL078C	839.086	-0.90811	9.01528e-11		YGL131C	139.395	-0.0771477	0.797025								YDR182W-A	144.122	-0.337131	0.190977		YDR182W-A	144.122	-0.12099	0.624985
	YGL079W	1031.96	0.700949	2.35911e-07		YGL133W	148.355	0.23234	0.389461								YDR183W	692.94	0.117514	0.332593		YDR183W	692.94	0.123293	0.273782
	YGL080W	1145.53	0.197866	0.222512		YGL134W	179.744	-0.72018	0.00142808								YDR183C-A	207.901	-0.402778	0.0641056		YDR183C-A	207.901	-0.0373674	0.865856
	YGL082W	280.571	-0.0723937	0.728006		YGL135W	54041.6	-0.119495	0.832246								YDR184C	2231.38	-0.359068	4.11214e-07		YDR184C	2231.38	0.0406435	0.580554
	YGL083W	202.02	-0.948966	4.6818e-06		YGL136C	472.24	-0.872766	6.73913e-08								YDR185C	382.236	0.185998	0.244593		YDR185C	382.236	-0.00815323	0.96142
	YGL084C	569.579	-0.560929	0.000200278		YGL137W	1551.15	-0.167752	0.243663								YDR186C	6413.79	0.205815	5.60689e-05		YDR186C	6413.79	0.476526	9.67178e-23
	YGL085W	231.446	0.736535	0.000397332		YGL139W	422.186	0.62645	0.000685051								YDR187C	11.9546	-0.677319	0.511821		YDR187C	11.9546	-1.17556	0.211657
	YGL087C	2333.55	0.231844	0.0686505		YGL140C	1023.67	0.138498	0.410061								YDR188W	5629.45	-0.674593	5.24008e-33		YDR188W	5629.45	-0.489572	3.59047e-19
	YGL088W	40.283	8.5217	3.67926e-08		YGL141W	239.953	0.0695878	0.780535								YDR189W	4255.75	-0.328862	2.49507e-09		YDR189W	4255.75	-0.125016	0.0210605
	YGL089C	1099.71	5.40087	3.59046e-143		YGL142C	654.788	-0.20194	0.237409								YDR190C	4803.41	-0.147638	0.0203423		YDR190C	4803.41	-0.184916	0.00231589
	YGL090W	412.113	1.57441	5.90841e-20		YGL143C	244.489	0.0866228	0.718278								YDR191W	686.011	0.48667	7.74216e-05		YDR191W	686.011	1.18055	2.78945e-25
	YGL091C	676.887	0.237149	0.134295		YGL144C	173.207	-0.134423	0.622803								YDR192C	1584.44	-0.0709902	0.423501		YDR192C	1584.44	0.693993	4.26115e-20
	YGL092W	555.661	-0.786415	2.28756e-07		YGL145W	437.541	0.0556149	0.810365								YDR193W	6.42891	0.92707	0.441193		YDR193W	6.42891	-0.24831	0.840449
	YGL093W	225.667	0.204993	0.375684		YGL146C	44.2879	-8.6688	4.30925e-08								YDR194C	6295.02	-0.525356	1.92612e-17		YDR194C	6295.02	0.0603404	0.351104
	YGL094C	251.702	-0.250185	0.216916		YGL147C	94698.5	0.874274	6.36069e-15								YDR194W-A	3.11686	4.73561	0.0236863		YDR194W-A	3.11686	2.9897	0.1594
	YGL095C	810.264	0.334877	0.0200703		YGL148W	3706.64	0.213393	0.115775								YDR195W	1549.46	0.26901	0.000877017		YDR195W	1549.46	0.725426	2.54933e-22
	YGL097W	516.136	-0.722726	2.27797e-06		YGL150C	716.198	0.0411384	0.82346								YDR196C	1324.51	0.112045	0.245502		YDR196C	1324.51	-0.273799	0.00194431
	YGL098W	3630.29	-1.31342	0.00596114		YGL151W	225.868	0.262161	0.243663								YDR197W	1758.32	-0.0734153	0.383783		YDR197W	1758.32	0.213914	0.00416548
	YGL099W	357.207	-1.73712	5.17969e-24		YGL153W	373.779	0.0945589	0.662176								YDR198C	1489.97	-0.124181	0.12967		YDR198C	1489.97	0.253027	0.000640576
	YGL100W	1171.92	-0.144999	0.313108		YGL154C	509.4	-1.45441	7.8409e-17								YDR199W	4.30994	-1.58498	0.332805		YDR199W	4.30994	-0.922872	0.532867
	YGL101W	1342.61	-0.58358	8.90034e-06		YGL155W	376.221	-1.52911	8.49454e-18								YDR200C	1639.63	0.0905188	0.369378		YDR200C	1639.63	0.328008	0.000258573
	YGL103W	58337.5	-0.887205	5.01955e-08		YGL156W	119.527	-0.998842	0.000206003								YDR201W	658.21	-0.113111	0.395913		YDR201W	658.21	-0.0707548	0.575892
	YGL104C	410.211	0.851831	6.07956e-07		YGL157W	1509.93	-0.893694	1.2194e-10								YDR202C	1176.34	0.219207	0.0187054		YDR202C	1176.34	0.0406353	0.670756
	YGL105W	6811.68	-0.556923	6.86031e-07		YGL159W	289.328	-0.408858	0.0434618								YDR203W	16.002	1.45288	0.0814798		YDR203W	16.002	2.0262	0.00852186
	YGL106W	1880.96	-0.255248	0.0593969		YGL160W	469.935	0.15766	0.431581								YDR204W	2070.64	0.341975	3.64441e-06		YDR204W	2070.64	0.193517	0.00737435
	YGL107C	545.002	-0.19143	0.277466		YGL161C	2124.49	-0.338836	0.00896382								YDR205W	3981.47	-0.0832333	0.253076		YDR205W	3981.47	0.0610373	0.388802
	YGL108C	263.915	0.213105	0.332732		YGL162W	315.861	0.047932	0.834879								YDR206W	4725.15	0.330998	1.55413e-07		YDR206W	4725.15	0.37391	1.19722e-09
	YGL110C	137.611	-0.325195	0.198717		YGL163C	45.681	0.414928	0.353513								YDR207C	2392.6	0.192519	0.00728799		YDR207C	2392.6	0.404124	1.6237e-09
	YGL111W	760.732	-0.252175	0.0997876		YGL164C	234.56	-0.141023	0.549769								YDR208W	5584.41	-0.304711	2.22399e-08		YDR208W	5584.41	0.169052	0.00143861
	YGL112C	585.853	-0.287275	0.0677077		YGL166W	512.26	-0.374259	0.0253591								YDR209C	6.42962	-0.880689	0.47308		YDR209C	6.42962	-1.59279	0.161852
	YGL113W	163.679	0.0108779	0.968034		YGL167C	1774.17	-0.115191	0.478541								YDR210W	1461.48	-0.071966	0.445252		YDR210W	1461.48	-0.405589	1.22984e-06
	YGL114W	654.045	1.01579	6.76446e-12		YGL169W	298.698	0.244798	0.251834								YDR210W-B	11646.2	-0.399439	4.06976e-16		YDR210W-B	11646.2	-0.972384	4.89138e-91
	YGL115W	1056.22	-0.324523	0.0169275		YGL171W	315.631	0.518726	0.00629636								YDR210W-A	3505.17	-0.362589	1.15341e-09		YDR210W-A	3505.17	-1.06989	5.97816e-77
	YGL116W	159.847	0.90209	0.000104893		YGL172W	786.365	0.0608607	0.737798								YDR210C-D	8101.72	-1.20537	1.24462e-08		YDR210C-D	8101.72	-1.95804	5.96944e-21
	YGL117W	775.242	1.2393	6.1132e-18		YGL173C	509.149	4.67344	6.78812e-111								YDR210C-C	2007.95	-1.29292	3.98819e-07		YDR210C-C	2007.95	-2.05142	2.67935e-16
	YGL118C	86.1341	2.12909	4.73092e-10		YGL174W	114.971	-0.47974	0.0899199								YDR211W	5020.14	-0.243609	1.62978e-05		YDR211W	5020.14	-0.0868926	0.123819
	YGL119W	322.52	-0.543183	0.00727389		YGL175C	199.58	-1.38045	3.55429e-10								YDR212W	7467.23	-0.593409	3.18072e-31		YDR212W	7467.23	-0.667469	3.61165e-41
	YGL120C	1673.22	-0.0608845	0.673884		YGL176C	153.445	0.0901137	0.763008								YDR213W	2563.07	0.303014	7.99902e-05		YDR213W	2563.07	1.23047	1.18777e-66
	YGL121C	760.554	2.43096	8.82022e-57		YGL178W	180.275	-0.306018	0.207481								YDR214W	6530.47	0.443703	3.2552e-15		YDR214W	6530.47	-0.331132	3.21498e-09
	YGL122C	1016.02	-0.396424	0.00383293		YGL179C	435.296	-0.253423	0.165506								YDR215C	31.3051	1.72099	0.00169672		YDR215C	31.3051	-0.15463	0.801259
	YGL123W	85432.9	-0.846614	1.32203e-13		YGL180W	138.024	-0.464474	0.0765128								YDR216W	5988.58	2.3126	7.39249e-278		YDR216W	5988.58	1.65528	7.72825e-145
	YGL124C	98.7715	1.01979	0.000312954		YGL181W	797.114	-0.16129	0.319417								YDR217C	3157.68	-0.536345	1.37571e-17		YDR217C	3157.68	0.198992	0.00100963
	YGL125W	2039.91	2.30474	8.66257e-77		YGL184C	96.0075	-1.231	2.50226e-05								YDR218C	85.2995	0.322637	0.399653		YDR218C	85.2995	0.0223556	0.953984
	YGL126W	1156.36	0.0836883	0.574705		YGL185C	179.883	-0.598736	0.0124425								YDR219C	1726.64	0.176962	0.0477641		YDR219C	1726.64	1.00179	1.16679e-35
	YGL127C	723.062	0.139599	0.384191		YGL186C	719.218	0.226474	0.260582								YDR220C	165.411	0.499797	0.0347213		YDR220C	165.411	0.94878	1.07295e-05
	YGL128C	299.187	2.09852	9.00417e-27		YGL187C	5559.47	0.255933	0.177225								YDR221W	3070.69	-0.336945	8.83237e-08		YDR221W	3070.69	0.201172	0.000883196
	YGL129C	457.295	-0.150076	0.424431		YGL189C	115452	0.612183	1.12709e-07								YDR222W	1920.72	0.0112875	0.893975		YDR222W	1920.72	0.183222	0.0090444
	YGL130W	670.954	0.345301	0.022839		YGL190C	1044.99	-0.262115	0.0761723								YDR223W	168.961	0.92249	8.65656e-05		YDR223W	168.961	1.34581	9.34468e-10
	YGL131C	146.908	0.200221	0.429138		YGL191W	3722.22	-0.0441896	0.781443								YDR224C	6003.11	-0.255816	5.67866e-06		YDR224C	6003.11	-0.782908	3.54325e-47
	YGL133W	144.725	-0.336298	0.166581		YGL194C	523.164	-0.693859	1.53067e-05								YDR225W	6781.47	-0.265223	2.11995e-07		YDR225W	6781.47	-0.780558	1.74352e-56
	YGL134W	233.141	1.26792	2.98541e-10		YGL194C-A	1013.49	-0.224151	0.147728								YDR226W	4935.22	-0.926946	8.20535e-62		YDR226W	4935.22	-1.24271	7.90705e-116
	YGL135W	40612.6	-0.842991	0.137885		YGL195W	2464.49	-0.387381	0.00814962								YDR227W	2881.8	-0.128259	0.0823738		YDR227W	2881.8	0.641423	4.61592e-22
	YGL136C	438.444	0.685574	2.3974e-05		YGL196W	517.736	0.939339	2.386e-09								YDR228C	2737.04	0.559239	3.41027e-13		YDR228C	2737.04	1.1599	1.12465e-55
	YGL137W	1219.98	-0.605493	2.76992e-06		YGL197W	400.534	0.270987	0.154977								YDR229W	1638.03	-0.140586	0.105839		YDR229W	1638.03	0.513113	2.60791e-11
	YGL139W	390.028	-0.969461	2.11093e-07		YGL198W	837.845	-0.0962243	0.578186								YDR230W	7.57555	0.135085	0.906024		YDR230W	7.57555	-0.129287	0.902523
	YGL140C	951.057	-0.396063	0.00601838		YGL199C	23.8645	8.26097	3.19939e-07								YDR231C	935.008	0.887585	1.306e-17		YDR231C	935.008	0.490456	1.51804e-06
	YGL141W	223.421	-0.313088	0.13394		YGL200C	9825.55	0.57013	2.47556e-06								YDR232W	9507.86	-0.614515	1.51697e-24		YDR232W	9507.86	-0.8593	6.93199e-48
	YGL142C	615.106	0.00695882	0.96856		YGL201C	461.063	0.110796	0.564559								YDR233C	14608.7	-0.476088	2.60749e-24		YDR233C	14608.7	-1.15875	5.27508e-140
	YGL143C	210.136	-0.607824	0.00312844		YGL202W	3426.8	0.32941	0.00983897								YDR234W	7134.91	-0.177457	0.00120836		YDR234W	7134.91	-0.315024	1.92738e-09
	YGL144C	146.816	-0.386252	0.114189		YGL203C	442.466	0.649577	0.000242403								YDR235W	1816.05	0.117656	0.127991		YDR235W	1816.05	0.516181	7.45861e-14
	YGL145W	452.746	0.0206849	0.924153		YGL204C	380.872	1.64746	1.59627e-22								YDR236C	1669.13	0.6632	8.01299e-17		YDR236C	1669.13	0.379143	1.27064e-06
	YGL146C	49.9013	8.83076	8.76307e-09		YGL206C	1944.5	0.183294	0.214341								YDR237W	1942.4	-0.464537	1.99512e-09		YDR237W	1942.4	-0.211116	0.00486
	YGL147C	83788	-1.48512	3.4319e-40		YGL207W	1375.26	-0.398129	0.00406053								YDR238C	11626.2	-0.457668	4.76876e-22		YDR238C	11626.2	-0.540158	2.55012e-31
	YGL148W	3206.79	-0.739315	6.28483e-10		YGL208W	129.438	0.205778	0.477472								YDR239C	1556.39	-0.503111	2.78928e-10		YDR239C	1556.39	0.14267	0.064468
	YGL150C	678.514	-0.22818	0.137137		YGL209W	520.926	-0.644425	8.78778e-05								YDR240C	1201.86	-0.397756	8.87661e-05		YDR240C	1201.86	0.569948	1.18781e-09
	YGL151W	257.061	0.0995541	0.636764		YGL210W	730.904	-0.141348	0.421784								YDR241W	236.319	0.529954	0.0047777		YDR241W	236.319	-0.353112	0.0578593
	YGL153W	323.273	-0.59478	0.00116661		YGL211W	359.89	-0.0338352	0.87911								YDR242W	1456.28	1.20543	3.67171e-45		YDR242W	1456.28	0.750082	3.62623e-19
	YGL154C	623.059	1.82465	1.7991e-29		YGL212W	193.893	-0.641065	0.00497987								YDR243C	1010.36	0.0788501	0.453839		YDR243C	1010.36	0.551006	1.24625e-09
	YGL155W	319.375	1.18538	2.90016e-11		YGL213C	1148.15	-0.415195	0.00244097								YDR244W	1802.68	0.238432	0.00312583		YDR244W	1802.68	0.567328	2.98572e-14
	YGL156W	165.789	1.64662	1.28234e-12		YGL215W	1335.03	0.382031	0.00922127								YDR245W	4035.25	-0.771639	1.89613e-41		YDR245W	4035.25	-0.567971	5.31445e-25
	YGL157W	1072.1	0.0200404	0.90289		YGL216W	294.73	-0.030745	0.904052								YDR246W	1660.08	0.293952	0.000580301		YDR246W	1660.08	0.441208	4.15308e-08
	YGL159W	204.678	-0.658952	0.00227206		YGL219C	395.665	-0.13124	0.532616								YDR246W-A	104.508	0.627154	0.0381236		YDR246W-A	104.508	0.752942	0.00803154
	YGL160W	456.991	-0.269043	0.146522		YGL221C	2737.78	-0.216273	0.100588								YDR247W	2325.35	-0.0767125	0.317573		YDR247W	2325.35	0.152138	0.0282377
	YGL161C	2339.95	0.561117	2.79378e-06		YGL222C	712.474	0.135052	0.425282								YDR248C	1085.14	-0.273825	0.00436688		YDR248C	1085.14	-0.660484	1.95108e-13
	YGL162W	423.697	0.696	2.50599e-05		YGL223C	219.78	-0.49817	0.0246363								YDR249C	1238.91	0.522799	2.40631e-08		YDR249C	1238.91	0.991137	6.13577e-29
	YGL163C	69.2761	0.706396	0.031255		YGL224C	572.995	-0.282859	0.102766								YDR250C	25.9657	1.73574	0.00528262		YDR250C	25.9657	1.25842	0.0391649
	YGL164C	239.399	0.176155	0.401975		YGL225W	7149.4	0.311619	0.0125642								YDR251W	5008.45	-0.11428	0.0436123		YDR251W	5008.45	-0.0301236	0.600324
	YGL166W	479.463	0.179708	0.300594		YGL226C-A	1835.5	1.22783	8.86797e-24								YDR252W	375.196	0.591991	9.36912e-05		YDR252W	375.196	0.799986	2.14746e-08
	YGL167C	1479.98	-0.46454	0.00142916		YGL226W	751.924	0.217745	0.173147								YDR253C	225.951	0.712104	0.00116502		YDR253C	225.951	0.175323	0.442165
	YGL169W	310.754	-0.147296	0.459049		YGL227W	133.432	-0.563951	0.0325712								YDR254W	800.045	0.703837	3.32519e-11		YDR254W	800.045	0.764046	6.38414e-14
	YGL171W	280.968	-0.999949	5.17615e-07		YGL228W	1006	0.148303	0.338689								YDR255C	1334.13	0.46612	7.9993e-08		YDR255C	1334.13	1.04865	1.55818e-38
	YGL172W	694.66	-0.479507	0.00111494		YGL229C	62.2048	-0.502798	0.187583								YDR256C	289.151	0.59288	0.000694987		YDR256C	289.151	0.710675	1.56204e-05
	YGL173C	910.21	-0.246169	0.0911848		YGL231C	2398.8	0.411857	0.00154774								YDR257C	1681.61	0.342807	1.81498e-05		YDR257C	1681.61	0.665148	1.0746e-18
	YGL174W	108.403	0.310346	0.273867		YGL232W	905.746	0.125525	0.440246								YDR258C	5344.76	1.02127	3.7139e-74		YDR258C	5344.76	0.676565	1.81585e-34
	YGL175C	149.087	0.739231	0.00205385		YGL233W	588.703	0.0191101	0.919739								YDR259C	958.874	0.393217	0.00103561		YDR259C	958.874	1.42761	5.19592e-39
	YGL176C	120.699	-0.96294	0.000289397		YGL234W	2867.21	-0.331106	0.0191518								YDR260C	1209.9	0.708257	3.68918e-16		YDR260C	1209.9	0.531102	3.12323e-10
	YGL178W	170.536	0.136458	0.578313		YGL236C	223.362	0.272932	0.246131								YDR261C	3534.09	-0.654323	4.30101e-28		YDR261C	3534.09	-0.696568	5.71211e-34
	YGL179C	564.355	0.864718	1.59143e-08		YGL237C	45.3529	0.0167445	0.974725								YDR261W-B	9912.87	-0.309293	1.27568e-09		YDR261W-B	9912.87	-1.01497	5.58072e-93
	YGL180W	136.075	0.409124	0.107197		YGL238W	1412.6	0.0547419	0.740919								YDR261W-A	4973.77	-0.300723	7.0785e-08		YDR261W-A	4973.77	-1.18073	1.58866e-105
	YGL181W	909.485	0.484097	0.000517584		YGL240W	290.157	-0.372811	0.0684114								YDR261C-D	4718.14	-1.31429	0.000125018		YDR261C-D	4718.14	-2.35724	1.86369e-12
	YGL184C	145.577	2.012	2.35673e-15		YGL241W	166.614	0.160173	0.548858								YDR261C-C	1925.37	-1.30764	3.40713e-07		YDR261C-C	1925.37	-2.38125	3.20111e-21
	YGL185C	160.595	0.296752	0.2338		YGL242C	942.341	-0.107044	0.534338								YDR262W	2572.02	0.260863	0.000604735		YDR262W	2572.02	0.17789	0.0167853
	YGL186C	662.226	-0.525844	0.00170368		YGL243W	259.855	-0.865104	2.50799e-05								YDR263C	635.063	0.459438	0.000131189		YDR263C	635.063	0.81293	4.67897e-13
	YGL187C	4992.91	-0.647448	0.000368185		YGL244W	884.098	0.205247	0.199906								YDR264C	8124.06	-0.00286094	0.961932		YDR264C	8124.06	-0.216935	7.25546e-06
	YGL189C	105042	-1.01884	2.85045e-20		YGL245W	3484.81	0.651568	6.34257e-08								YDR265W	1239.22	0.906584	8.19795e-26		YDR265W	1239.22	1.20405	5.3411e-48
	YGL190C	935.402	-0.0686894	0.655567		YGL246C	700.611	0.159133	0.368815								YDR266C	4274.86	-0.127367	0.0272012		YDR266C	4274.86	-0.102872	0.0639479
	YGL191W	3791.37	0.0750804	0.637462		YGL247W	548.604	-0.35221	0.0583121								YDR267C	1734.54	-0.119532	0.204892		YDR267C	1734.54	0.147147	0.0948329
	YGL194C	546.708	0.778142	1.08356e-06		YGL248W	486.002	-0.150009	0.420607								YDR268W	1240.24	0.272347	0.00359912		YDR268W	1240.24	0.377303	1.87912e-05
	YGL194C-A	1345.46	0.892942	1.97364e-11		YGL250W	175.961	-0.436467	0.0704325								YDR269C	5.53523	3.17588	0.0336349		YDR269C	5.53523	2.537	0.0848346
	YGL195W	1953.63	-0.293779	0.0193195		YGL252C	804.351	0.215539	0.177901								YDR270W	2899.48	-0.314104	0.000269078		YDR270W	2899.48	0.448903	4.19833e-08
	YGL196W	433.656	-1.91695	3.44756e-30		YGL253W	29575	-0.465289	0.00022566								YDR271C	48.5766	2.49235	1.99792e-08		YDR271C	48.5766	1.5348	0.000550181
	YGL197W	428.233	-0.0884618	0.646835		YGL254W	253.957	-0.626257	0.00241721								YDR272W	1760.62	-0.0448607	0.673328		YDR272W	1760.62	-0.470345	3.14318e-07
	YGL198W	796.339	-0.0716371	0.666493		YGL255W	1298.63	1.19136	5.97131e-20								YDR273W	198.44	0.288855	0.249815		YDR273W	198.44	1.12432	3.10921e-07
	YGL199C	55.6929	0.39793	0.284332		YGL256W	2195.67	-0.979358	8.88978e-15								YDR274C	13.5377	0.820715	0.346105		YDR274C	13.5377	-1.15946	0.185442
	YGL200C	9328.43	-0.793313	4.20861e-12		YGL257C	514.255	0.180838	0.307225								YDR275W	1148.54	0.506475	4.10892e-07		YDR275W	1148.54	0.830042	2.46365e-18
	YGL201C	439.232	-0.284745	0.110658		YGL258W	40.3564	-1.06467	0.0224192								YDR276C	5570.17	-0.410213	1.06051e-14		YDR276C	5570.17	-1.34216	8.90136e-148
	YGL202W	2999.82	-0.836326	1.39905e-11		YGR001C	2224.19	0.515153	4.92522e-05								YDR277C	2025.68	2.01444	3.781e-132		YDR277C	2025.68	2.14056	5.51548e-156
	YGL203C	438.22	-0.714714	1.1394e-05		YGR002C	285.513	-0.0913304	0.695524								YDR278C	10.3613	-1.03086	0.29876		YDR278C	10.3613	-2.54555	0.0080783
	YGL204C	319.619	-3.3405	8.28431e-62		YGR003W	308.889	-0.259651	0.207363								YDR279W	1024.84	-0.279527	0.0026595		YDR279W	1024.84	-0.145964	0.1038
	YGL206C	1407.56	-1.51005	1.27513e-33		YGR004W	144.694	-0.0267563	0.931716								YDR280W	2457.21	-0.211725	0.0018025		YDR280W	2457.21	0.056859	0.404393
	YGL207W	1278.83	0.187601	0.202262		YGR005C	628.764	0.225432	0.183161								YDR281C	577.505	-4.22222	1.0383e-125		YDR281C	577.505	-1.62392	5.79399e-47
	YGL208W	167.889	0.487692	0.035644		YGR006W	192.679	-0.753568	0.00057981								YDR282C	939.071	-0.0585706	0.618579		YDR282C	939.071	0.554325	1.96943e-08
	YGL209W	632.509	1.06183	1.65168e-12		YGR007W	1182.75	-0.240838	0.0951272								YDR283C	4825.22	0.00837648	0.905515		YDR283C	4825.22	0.466189	1.9045e-16
	YGL210W	650.77	-0.221149	0.173099		YGR008C	2385.46	0.0565046	0.742214								YDR284C	3019.87	0.248612	0.000221681		YDR284C	3019.87	-0.316153	1.17972e-06
	YGL211W	386.006	0.206865	0.298365		YGR009C	308.504	0.354713	0.0678279								YDR285W	790.52	0.766645	5.9199e-12		YDR285W	790.52	1.42886	4.96604e-42
	YGL212W	241.209	1.10954	3.57127e-08		YGR010W	290.924	-0.234309	0.263167								YDR286C	415.901	0.314254	0.0402797		YDR286C	415.901	0.287999	0.0469437
	YGL213C	1017.55	0.073539	0.625096		YGR012W	284.254	-0.212909	0.322786								YDR287W	1401.84	0.0975762	0.2995		YDR287W	1401.84	0.145645	0.0909928
	YGL215W	1060.06	-1.3482	3.87212e-20		YGR013W	170.899	0.27905	0.281418								YDR288W	1340.71	0.1183	0.181478		YDR288W	1340.71	0.324718	4.50565e-05
	YGL216W	255.3	-0.438825	0.0387762		YGR014W	509.796	0.584623	0.00225211								YDR289C	1142.23	0.0724336	0.496904		YDR289C	1142.23	0.43277	2.46281e-06
	YGL219C	405.221	0.174983	0.364605		YGR015C	219.571	-0.567691	0.00776272								YDR291W	2828.63	0.173324	0.00741631		YDR291W	2828.63	0.510445	1.64314e-17
	YGL221C	2455.93	-0.113209	0.388232		YGR016W	61.2755	-1.53172	3.18167e-05								YDR292C	3986.78	-0.463825	6.56002e-17		YDR292C	3986.78	-0.376691	1.79428e-12
	YGL222C	1712.26	1.83078	1.58498e-46		YGR017W	1576.57	0.749972	3.72104e-09								YDR294C	4832.41	-0.473374	3.21493e-18		YDR294C	4832.41	-0.47608	1.13404e-19
	YGL223C	344.942	1.46175	5.17475e-14		YGR018C	40.0131	1.70661	0.000269705								YDR295C	1655.21	-0.0764671	0.430443		YDR295C	1655.21	0.874196	2.34121e-26
	YGL224C	579.931	0.294291	0.0695102		YGR019W	238.957	0.811082	5.16972e-05								YDR296W	1834.85	0.00285874	0.973363		YDR296W	1834.85	0.059852	0.449776
	YGL225W	6129.42	-0.899138	9.56248e-14		YGR020C	4967.64	0.713415	4.91071e-10								YDR297W	4970.25	-0.228151	0.000173039		YDR297W	4970.25	-0.441885	2.77074e-14
	YGL226C-A	1900.83	-1.0997	8.285e-20		YGR021W	231.194	-0.252078	0.281752								YDR298C	5493.82	-0.303565	3.29314e-08		YDR298C	5493.82	-0.662272	6.87556e-36
	YGL226W	816.098	0.00495326	0.975724		YGR023W	682.358	0.0603675	0.747632								YDR299W	2765.15	-0.428366	5.52523e-08		YDR299W	2765.15	0.146796	0.0601085
	YGL227W	128.54	0.453786	0.0775829		YGR024C	3237.69	-0.334395	0.00685181								YDR300C	2252.23	-0.750451	2.60749e-24		YDR300C	2252.23	0.0963495	0.187451
	YGL228W	827.92	-0.852819	2.10061e-09		YGR026W	2436.97	0.37473	0.00279957								YDR301W	3910.79	-0.50623	8.03193e-18		YDR301W	3910.79	0.342469	1.00855e-09
	YGL229C	54.7028	0.150005	0.70455		YGR027C	88821.2	1.00685	2.52027e-11								YDR302W	1857.83	-0.0926448	0.276719		YDR302W	1857.83	-0.088931	0.269957
	YGL231C	2318.04	-0.556427	9.97892e-05		YGR027W-A	569.659	1.6125	1.17729e-26								YDR303C	3384.38	-0.586278	5.80467e-22		YDR303C	3384.38	0.193632	0.000974714
	YGL232W	867.701	-0.282461	0.0477174		YGR028W	329.997	0.0468272	0.834879								YDR304C	4496.96	-0.427133	1.35812e-13		YDR304C	4496.96	-1.21934	1.92866e-104
	YGL233W	530.01	-0.367453	0.026034		YGR029W	739.245	-0.415236	0.00550293								YDR305C	1109.56	0.142426	0.173215		YDR305C	1109.56	0.281793	0.00305624
	YGL234W	2488.39	-0.0820015	0.549837		YGR030C	362.317	-0.770308	5.12594e-05								YDR306C	1378.1	0.320632	0.000274284		YDR306C	1378.1	0.741164	1.4719e-19
	YGL236C	200.549	-0.669323	0.00196573		YGR031W	313.789	-0.731757	8.98238e-05								YDR307W	3862.95	0.060778	0.339182		YDR307W	3862.95	-0.199213	0.000518796
	YGL237C	53.6651	0.416383	0.281992		YGR032W	586.345	0.21856	0.199906								YDR308C	1676.92	0.242201	0.00328985		YDR308C	1676.92	-0.0957247	0.245832
	YGL238W	1182.69	-0.664408	4.63107e-07		YGR033C	1649.1	-0.523845	4.88625e-05								YDR309C	6087.02	0.52023	7.64938e-19		YDR309C	6087.02	0.616231	6.03707e-27
	YGL240W	272.52	0.187898	0.358295		YGR034W	25155.8	0.790909	7.14426e-10								YDR310C	3736.67	-0.657333	5.28501e-24		YDR310C	3736.67	-0.0334968	0.628925
	YGL241W	166.58	-0.183699	0.441551		YGR035C	90.2539	3.08451	1.64663e-19								YDR311W	2059.2	-0.3536	3.45398e-06		YDR311W	2059.2	0.611793	3.11837e-18
	YGL242C	915.085	0.00238454	0.989081		YGR035W-A	8.05791	-6.21007	0.000411285								YDR312W	2063.47	-0.485552	1.09569e-09		YDR312W	2063.47	0.0809373	0.315262
	YGL243W	92.5537	-10.2329	1.55153e-11		YGR036C	564.439	0.205175	0.256427								YDR313C	1202.36	0.491854	4.34288e-08		YDR313C	1202.36	1.18754	9.3306e-46
	YGL244W	832.409	-0.425317	0.00414857		YGR037C	4299.46	0.622009	0.196261								YDR314C	1239.79	0.257097	0.00990911		YDR314C	1239.79	1.13318	6.87397e-36
	YGL245W	2993.76	-1.3388	4.11498e-31		YGR038W	2579.78	-0.138907	0.354736								YDR315C	551.953	0.236444	0.0934787		YDR315C	551.953	0.661314	1.55244e-07
	YGL246C	708.59	-0.147511	0.37673		YGR039W	89.9686	0.000997598	0.998483								YDR316W	1650.4	0.0458131	0.816927		YDR316W	1650.4	0.207183	0.245775
	YGL247W	649.869	0.74488	4.50197e-07		YGR040W	292.967	0.135912	0.53867								YDR316W-B	6631.61	-1.2616	3.33057e-06		YDR316W-B	6631.61	-2.24315	3.49613e-17
	YGL248W	615.857	0.724945	1.06495e-06		YGR041W	785.789	0.240163	0.123269								YDR316W-A	1657.99	-1.62843	5.83869e-05		YDR316W-A	1657.99	-2.79221	1.86605e-12
	YGL250W	197.947	0.702216	0.00174776		YGR042W	578.81	-0.953376	1.14838e-09								YDR317W	156.262	-0.833738	0.000499125		YDR317W	156.262	0.0657644	0.783012
	YGL252C	896.381	0.0814263	0.606776		YGR044C	2102.87	0.0341985	0.826197								YDR318W	920.739	0.652613	1.2429e-10		YDR318W	920.739	0.900256	1.01594e-20
	YGL253W	18485.3	-1.0695	1.16847e-18		YGR046W	323.789	0.253175	0.200388								YDR319C	1458.33	0.609144	9.31058e-10		YDR319C	1458.33	-0.0950259	0.36732
	YGL254W	229.76	0.360265	0.0913907		YGR047C	352.227	-0.523222	0.00618778								YDR320C	2531.07	0.140415	0.0609449		YDR320C	2531.07	0.187012	0.00787944
	YGL255W	1237.86	-1.47289	5.66461e-31		YGR048W	330.603	-0.0545942	0.808898								YDR320C-A	1367.89	0.139458	0.127587		YDR320C-A	1367.89	-0.579522	6.02192e-12
	YGL256W	2346.45	1.10536	1.03264e-20		YGR049W	930.832	-0.0199498	0.914077								YDR320W-B	130.051	1.04259	0.000111875		YDR320W-B	130.051	0.431922	0.112713
	YGL257C	468.416	-0.511778	0.00148227		YGR050C	125.686	-1.36677	3.66417e-07								YDR321W	5367.06	-0.442023	2.45369e-14		YDR321W	5367.06	-1.15944	2.49575e-93
	YGL258W	56.6929	1.72399	8.16083e-06		YGR052W	91.8277	3.14614	5.61101e-21								YDR322W	1829.28	-0.203177	0.0123944		YDR322W	1829.28	-0.118879	0.130705
	YGR001C	2142.89	-0.677386	3.06915e-07		YGR053C	40.4729	0.028616	0.95617								YDR322C-A	1280.71	-0.214883	0.0374879		YDR322C-A	1280.71	-0.941316	1.64835e-22
	YGR002C	306.448	0.262733	0.169231		YGR054W	4413.11	0.304306	0.0183087								YDR323C	670.823	0.372407	0.00252311		YDR323C	670.823	1.3905	9.04167e-36
	YGR003W	394.154	0.833546	6.68881e-07		YGR055W	1040.52	0.549408	0.000294963								YDR324C	4961.77	-0.581929	9.19885e-27		YDR324C	4961.77	-0.440462	6.09574e-17
	YGR004W	95.7895	-1.61095	3.11159e-08		YGR056W	334.899	-0.202156	0.322478								YDR325W	2942.1	-0.145545	0.0362201		YDR325W	2942.1	0.507027	1.08679e-15
	YGR005C	642.807	-0.180778	0.25602		YGR057C	201.115	-0.977338	7.49385e-06								YDR326C	8592.5	-1.04459	7.40737e-111		YDR326C	8592.5	-0.643467	9.05543e-46
	YGR006W	184.366	0.632568	0.00352235		YGR058W	142.066	-0.453564	0.0893995								YDR327W	5.80103	-0.469261	0.72145		YDR327W	5.80103	-1.64719	0.172036
	YGR007W	1133.11	0.103391	0.475192		YGR060W	13172.9	0.491803	1.36931e-05								YDR328C	3446.35	-0.0179246	0.813639		YDR328C	3446.35	-0.593722	1.52139e-20
	YGR008C	3586.35	0.946272	2.81873e-13		YGR061C	3210.6	0.0104061	0.95087								YDR329C	1880.56	-0.0146048	0.866943		YDR329C	1880.56	0.151327	0.038443
	YGR009C	360.783	0.0951186	0.618122		YGR062C	492.189	-0.716534	1.73421e-05								YDR330W	1882.03	-0.0143611	0.880169		YDR330W	1882.03	0.369069	1.78741e-06
	YGR010W	281.144	0.120802	0.554385		YGR063C	4143.25	0.184353	0.196013								YDR331W	2994.24	0.0567401	0.405569		YDR331W	2994.24	0.190754	0.00172096
	YGR012W	239.688	-0.30994	0.135954		YGR065C	725.838	-0.64483	5.66846e-05								YDR332W	1223.74	0.829149	2.17968e-21		YDR332W	1223.74	1.03186	1.49708e-34
	YGR013W	157.401	-0.584734	0.0112314		YGR068C	292.833	-0.246789	0.233011								YDR333C	2649.25	-0.0741125	0.345109		YDR333C	2649.25	0.768997	9.98937e-30
	YGR014W	543.043	-0.390682	0.0161126		YGR070W	167.337	-1.26731	8.57504e-08								YDR334W	3946.3	-1.04767	9.96718e-63		YDR334W	3946.3	-0.196814	0.00123614
	YGR015C	345.654	1.52518	1.31875e-17		YGR071C	304.541	-0.257094	0.203648								YDR335W	4470.96	-0.216567	0.164141		YDR335W	4470.96	-0.0467318	0.772025
	YGR016W	107.399	2.53263	1.84678e-16		YGR072W	388.666	-0.0644271	0.788576								YDR336W	824.985	0.656898	7.96909e-09		YDR336W	824.985	0.838069	1.97798e-14
	YGR017W	1615.87	-0.685448	2.25137e-07		YGR074W	2558.56	-0.364108	0.00404263								YDR337W	1996.82	-0.37374	2.91983e-06		YDR337W	1996.82	-0.0295515	0.723635
	YGR018C	102.365	1.22944	6.42912e-05		YGR075C	145.343	-0.782007	0.00154638								YDR338C	1988.02	-0.0116841	0.893929		YDR338C	1988.02	0.749857	2.24102e-27
	YGR019W	308.09	0.01375	0.947389		YGR076C	798.824	-0.260662	0.116115								YDR339C	2088.59	-0.0880039	0.252607		YDR339C	2088.59	-0.132111	0.0623687
	YGR020C	4314.8	-1.36702	4.60751e-26		YGR077C	802.786	-0.163517	0.340294								YDR340W	10.9154	0.589901	0.529366		YDR340W	10.9154	-0.891722	0.329355
	YGR021W	233.566	0.258483	0.242411		YGR078C	1251.35	0.178794	0.225056								YDR341C	8364.42	-0.546783	2.17657e-31		YDR341C	8364.42	-0.812779	1.19037e-70
	YGR023W	797.981	0.349333	0.0250652		YGR080W	702.693	-0.0595963	0.747974								YDR342C	24207.3	1.4698	5.6599e-270		YDR342C	24207.3	-0.208715	1.12454e-06
	YGR024C	2924.7	0.0380811	0.774388		YGR081C	1907.86	0.095323	0.518817								YDR343C	884.582	2.96597	6.18845e-76		YDR343C	884.582	0.778787	2.79492e-06
	YGR026W	2511.04	-0.301659	0.0171914		YGR082W	2548.22	-0.143373	0.305057								YDR344C	333.233	0.567329	0.000795042		YDR344C	333.233	1.2933	1.19821e-16
	YGR027C	83152.3	-1.35108	5.07985e-17		YGR083C	474.023	0.0717016	0.749336								YDR345C	11931.4	-1.02217	2.15612e-92		YDR345C	11931.4	-1.23679	1.10331e-138
	YGR027W-A	617.445	-1.22688	8.35461e-17		YGR085C	18873.2	-0.226883	0.0782043								YDR346C	6510.92	-0.776485	2.60235e-56		YDR346C	6510.92	-0.644343	7.01169e-42
	YGR028W	331.557	-0.0557421	0.777828		YGR086C	2625.41	-0.14329	0.297496								YDR347W	2949.1	-0.60412	5.55349e-23		YDR347W	2949.1	-0.542432	1.77818e-20
	YGR029W	651.167	0.0562888	0.735215		YGR088W	145.009	-0.84255	0.00121191								YDR348C	3180.75	-0.282288	2.76648e-05		YDR348C	3180.75	0.130872	0.0475814
	YGR030C	419.775	1.07877	4.0497e-09		YGR089W	279.311	1.00012	8.22627e-08								YDR349C	6421.12	0.385351	4.84109e-14		YDR349C	6421.12	-0.122247	0.0183184
	YGR031W	349.378	0.956068	3.25135e-08		YGR090W	636.534	-0.0232551	0.91657								YDR350C	2757.59	0.749698	4.23232e-30		YDR350C	2757.59	1.03029	2.23872e-59
	YGR032W	2790.31	2.95966	8.74545e-131		YGR091W	183.07	0.83365	0.000195621								YDR352W	2424.39	-0.366719	3.97032e-07		YDR352W	2424.39	-0.319568	4.59736e-06
	YGR033C	1371.66	0.0175371	0.908368		YGR092W	377.356	-0.255718	0.19033								YDR353W	8441.39	-0.213135	2.28458e-05		YDR353W	8441.39	-0.890095	1.41166e-75
	YGR034W	22742.8	-1.26492	5.12937e-21		YGR093W	295.412	0.478795	0.0144477								YDR354W	4741.67	0.345327	1.01958e-09		YDR354W	4741.67	-0.0558563	0.34734
	YGR035C	111.143	-1.4457	1.04673e-07		YGR095C	755.906	-0.0604673	0.757911								YDR354C-A	4.64644	4.16804	0.033465		YDR354C-A	4.64644	3.05374	0.117693
	YGR035W-A	28.9316	8.04435	2.51899e-07		YGR096W	340.296	-0.262804	0.204433								YDR356W	1995.29	-0.697362	1.08018e-12		YDR356W	1995.29	0.309261	0.0010994
	YGR036C	633.399	0.111514	0.511736		YGR097W	886.595	-0.305834	0.0437467								YDR357C	1086.98	0.470354	4.75537e-07		YDR357C	1086.98	-0.44692	1.15413e-06
	YGR037C	3538.7	-1.52102	0.000420861		YGR098C	190.597	-0.660514	0.00308956								YDR358W	1921.83	0.888887	8.47663e-29		YDR358W	1921.83	1.15711	1.27136e-51
	YGR038W	3219.25	0.68034	1.01684e-07		YGR099W	280.955	0.110138	0.641935								YDR359C	4052.17	0.0713945	0.350733		YDR359C	4052.17	0.751973	4.66386e-29
	YGR039W	80.3793	-0.372899	0.232569		YGR100W	285.353	-0.412193	0.0380129								YDR360W	8.05922	-0.0811975	0.945994		YDR360W	8.05922	0.149293	0.891633
	YGR040W	324.492	0.137466	0.490229		YGR101W	1073.44	0.443169	0.00123791								YDR361C	2022.97	-0.379643	1.4434e-07		YDR361C	2022.97	-0.685953	2.48594e-23
	YGR041W	775.808	-0.305282	0.0389515		YGR102C	246.875	-0.345632	0.106394								YDR362C	1362.04	-0.0198068	0.841121		YDR362C	1362.04	0.555312	4.11387e-12
	YGR042W	601.72	1.02092	1.33853e-11		YGR103W	1035.43	0.685014	5.35527e-07								YDR363W	1067.6	0.221965	0.0762882		YDR363W	1067.6	0.346614	0.00319202
	YGR044C	1837.17	-0.486548	7.7722e-05		YGR104C	258.274	-0.46097	0.0233542								YDR363W-A	2693.55	-0.113273	0.110241		YDR363W-A	2693.55	-0.987493	1.00017e-51
	YGR045C	28.9337	8.04443	2.522e-07		YGR105W	3814.57	0.734529	3.22921e-10								YDR364C	1765.94	0.435946	1.2326e-08		YDR364C	1765.94	0.725245	2.7776e-23
	YGR046W	406.181	0.36707	0.0306803		YGR106C	7306.25	0.226147	0.0922157								YDR365C	4560.44	-1.04314	9.45671e-48		YDR365C	4560.44	-1.15703	5.93514e-61
	YGR047C	321.65	0.273433	0.171447		YGR107W	139.185	-0.542534	0.0344789								YDR365W-B	2759.74	-1.1293	2.81483e-13		YDR365W-B	2759.74	-2.22661	2.85689e-48
	YGR048W	385.286	0.441238	0.0100833		YGR108W	1584.28	-0.455619	0.000654498								YDR365W-A	1167.9	-1.19738	2.87066e-09		YDR365W-A	1167.9	-2.64088	2.88181e-40
	YGR049W	1089.05	0.42034	0.00301509		YGR109C	26.4319	-7.92469	8.60751e-07								YDR366C	11.4376	-0.145637	0.877452		YDR366C	11.4376	-0.563913	0.503457
	YGR050C	258.358	2.65093	1.8323e-31		YGR110W	232.782	-0.678439	0.00108599								YDR367W	1735.07	-0.306068	8.9322e-05		YDR367W	1735.07	-0.580762	4.28073e-15
	YGR052W	138.688	-0.5785	0.0179985		YGR111W	612.485	-0.314815	0.0513278								YDR368W	2920.85	-0.532886	1.07683e-18		YDR368W	2920.85	-0.957155	3.65015e-61
	YGR053C	44.3198	0.20386	0.64043		YGR112W	240.518	-0.596799	0.00412212								YDR369C	1237.77	0.00582883	0.956942		YDR369C	1237.77	0.473458	1.96358e-08
	YGR054W	4183.13	-0.509701	1.84829e-05		YGR113W	405.449	-0.644893	0.000165168								YDR370C	1769.17	0.524728	1.26668e-12		YDR370C	1769.17	0.751283	2.25583e-26
	YGR055W	1252.36	0.0151648	0.930733		YGR116W	82.3374	-0.0616291	0.879351								YDR371W	1398.93	0.342295	0.000127939		YDR371W	1398.93	0.416584	9.98774e-07
	YGR056W	420.293	0.74782	9.1675e-06		YGR117C	1187.56	-0.169757	0.266591								YDR371C-A	3.75781	0.911267	0.569328		YDR371C-A	3.75781	-1.44692	0.379734
	YGR057C	192.324	0.862031	8.30101e-05		YGR118W	20449.1	0.126613	0.504729								YDR372C	4212.15	-0.272573	1.12229e-05		YDR372C	4212.15	-0.446851	5.74567e-14
	YGR058W	187.29	1.06811	2.23842e-06		YGR119C	1126.85	0.383631	0.00597448								YDR373W	1986.89	0.291579	9.65548e-05		YDR373W	1986.89	-0.102169	0.175458
	YGR060W	10237.6	-1.64506	1.30954e-51		YGR120C	464.747	-0.135989	0.487753								YDR374C	77.0675	0.175637	0.687059		YDR374C	77.0675	-1.60049	7.91072e-05
	YGR061C	2715.48	-0.571954	3.68189e-06		YGR121C	217.125	0.97513	1.22816e-05								YDR374W-A	464.365	0.924955	8.9918e-12		YDR374W-A	464.365	-0.0146055	0.92549
	YGR062C	420.35	0.310343	0.0779413		YGR122W	30.0344	-0.00201568	0.998346								YDR375C	1823.79	0.0271849	0.749497		YDR375C	1823.79	0.552428	4.01305e-15
	YGR063C	4200.74	-0.164914	0.258206		YGR123C	1616.53	0.377106	0.00663724								YDR376W	2124.26	-0.171014	0.0249785		YDR376W	2124.26	-0.0571079	0.454557
	YGR065C	708.101	0.567311	0.000632488		YGR124W	2181.83	0.153621	0.277666								YDR377W	2879.48	-0.104059	0.109927		YDR377W	2879.48	-0.76555	8.65794e-38
	YGR068C	459.634	1.26625	3.27321e-15		YGR125W	454.037	-0.0518189	0.798516								YDR378C	1667.55	-0.0763095	0.352929		YDR378C	1667.55	-0.613144	3.42555e-17
	YGR070W	397.213	2.81527	3.81907e-44		YGR126W	216.156	-1.15214	4.36326e-08								YDR379W	2801.17	0.674234	8.24228e-25		YDR379W	2801.17	1.00227	7.51468e-57
	YGR071C	276.844	-0.0287247	0.893982		YGR127W	10.5214	-6.59711	0.000113026								YDR379C-A	744.667	1.44061	1.15289e-35		YDR379C-A	744.667	0.593888	2.62198e-07
	YGR072W	367.909	-0.118588	0.583339		YGR128C	1309.71	0.264165	0.0720476								YDR380W	7797.69	0.625464	3.88001e-38		YDR380W	7797.69	0.948785	3.55975e-91
[truncated: 4,620 more rows]
