# Supplementary material for: Decapping factor Dcp2 controls mRNA abundance and translation to adjust metabolism and filamentation to nutrient availability
Source: eLife journal article supplement (doi:10.7554/elife.85545), 2023-06-02
Supplement: fig3-figsupp4-data1 [file Figure 3 – figure supplement 4 – source data 1.xlsx]

## Sheet: Codon_protection_index
Gene	Codon_protection_index
YJR094C	2.57646
YMR068W	2.30693
YDL044C	2.24945
YBR280C	2.09323
YMR262W	2.08097
YOL075C	2.03804
YMR167W	2.01435
YKL189W	1.99914
YPL250C	1.99336
YDR216W	1.95135
YDR043C	1.94802
YKR051W	1.9241
YCR066W	1.92347
YLR392C	1.90307
YLR291C	1.90026
YBR211C	1.89592
YCL005W	1.88251
YMR207C	1.88223
YGR081C	1.86972
YDR123C	1.85461
YDR488C	1.84948
YDR485C	1.84827
YER129W	1.8319
YNL304W	1.8306
YMR030W	1.79744
YOL108C	1.79463
YMR283C	1.77639
YJL059W	1.75937
YLR082C	1.7566
YOR308C	1.72839
YMR288W	1.7276
YGL135W	1.72561
YIR011C	1.71424
YJR080C	1.70031
YLR145W	1.69736
YJR003C	1.69604
YGR042W	1.69449
YLR191W	1.69144
YFR025C	1.68057
YCR028C	1.67617
YNR049C	1.67165
YOL133W	1.67015
YML113W	1.66247
YGL213C	1.64572
YJL051W	1.6424
YJL071W	1.62643
YFL049W	1.62111
YDR270W	1.62106
YOR034C	1.6197
YIL088C	1.6193
YGR109C	1.61407
YJL031C	1.61354
YLR008C	1.60797
YOR241W	1.60387
YER174C	1.60375
YNL119W	1.60177
YBL104C	1.60038
YPL026C	1.59869
YPL228W	1.57741
YIR038C	1.57628
YDR489W	1.57502
YDR229W	1.55148
YGR101W	1.55101
YLR405W	1.54329
YPR107C	1.54152
YDR295C	1.5262
YPL253C	1.52272
YOR288C	1.52031
YDR143C	1.51904
YDL115C	1.51733
YOL025W	1.5135
YMR144W	1.51211
YDR118W	1.51128
YOR251C	1.50583
YGL060W	1.50273
YLR417W	1.50014
YLR239C	1.49576
YIL035C	1.49512
YOR210W	1.49183
YGR239C	1.48962
YPR120C	1.48911
YLR135W	1.48881
YML128C	1.48769
YOR196C	1.48271
YGR143W	1.47804
YDL216C	1.47802
YLL031C	1.4756
YML016C	1.46732
YLL027W	1.4673
YBR005W	1.46329
YOR110W	1.46272
YBR036C	1.45949
YDL030W	1.45834
YDR160W	1.45829
YGR108W	1.45733
YLR243W	1.45512
YOR125C	1.45459
YMR002W	1.45062
YDL209C	1.44659
YJR100C	1.44597
YDR352W	1.44309
YKR101W	1.44256
YMR239C	1.44078
YMR233W	1.44058
YHL028W	1.43989
YHR036W	1.43986
YDL235C	1.43919
YDR235W	1.43883
YLR433C	1.43764
YBR043C	1.43076
YBR088C	1.43051
YOL142W	1.4288
YNL290W	1.42561
YNR074C	1.42444
YBL060W	1.42387
YBR097W	1.42115
YDR219C	1.4211
YHL020C	1.41714
YBR260C	1.41695
YMR268C	1.41653
YAL031C	1.416
YDR492W	1.41593
YML097C	1.41586
YPL179W	1.41399
YPR084W	1.41108
YAR014C	1.4086
YBR287W	1.40741
YOR316C	1.40648
YLR136C	1.40317
YBL034C	1.40317
YMR029C	1.39671
YDR473C	1.39483
YBL020W	1.39191
YPL112C	1.3875
YDR054C	1.38557
YNL216W	1.38048
YKL105C	1.37601
YOR244W	1.37441
YHR162W	1.37385
YOR064C	1.37136
YOR044W	1.3704
YKL140W	1.37006
YML064C	1.36964
YER051W	1.36596
YBR057C	1.36439
YJL053W	1.36255
YFL029C	1.3605
YBR034C	1.35672
YGL222C	1.35657
YOR103C	1.35641
YJL094C	1.35468
YNL212W	1.34894
YOR137C	1.34839
YCR005C	1.34595
YLR442C	1.34557
YOR075W	1.34492
YLR094C	1.34351
YBL061C	1.34273
YDR490C	1.34227
YPL269W	1.34219
YHR195W	1.34072
YBR006W	1.34065
YNL225C	1.3399
YOR344C	1.3396
YDR320C	1.33925
YMR211W	1.3389
YJL141C	1.33711
YIR010W	1.33679
YOR149C	1.3307
YKR068C	1.32915
YER059W	1.32451
YNL006W	1.32348
YOL149W	1.3227
YDR137W	1.3221
YJL025W	1.3214
YBL050W	1.32121
YHL029C	1.31799
YMR070W	1.31733
YNL027W	1.31526
YAR008W	1.31252
YOL013C	1.31132
YMR157C	1.30807
YOR306C	1.30742
YDR407C	1.307
YHR004C	1.30689
YGR194C	1.30543
YGL116W	1.30329
YPL055C	1.30263
YOR113W	1.30233
YOR262W	1.30153
YLR324W	1.30124
YOR291W	1.29917
YER035W	1.29731
YER001W	1.28489
YGL219C	1.28488
YML076C	1.28321
YHR120W	1.28199
YNL289W	1.28053
YLR418C	1.2783
YMR155W	1.27574
YMR086W	1.27542
YJR089W	1.27521
YER041W	1.2731
YER087W	1.27178
YGL155W	1.26908
YDR425W	1.267
YGR134W	1.26552
YDL207W	1.26419
YBR001C	1.26351
YOR025W	1.26285
YGR205W	1.26258
YKL049C	1.26212
YHR119W	1.26191
YIL153W	1.26184
YOR222W	1.26048
YJR030C	1.25928
YHR192W	1.25818
YNL192W	1.25644
YDR329C	1.25593
YOR231W	1.2538
YDR146C	1.25229
YMR269W	1.25124
YDL035C	1.24958
YNL116W	1.24705
YGR146C	1.24674
YBR173C	1.24671
YML052W	1.24449
YLR439W	1.24444
YER099C	1.24403
YML119W	1.24242
YHR178W	1.24098
YMR152W	1.24083
YOL112W	1.23915
YOR014W	1.23863
YER018C	1.23822
YIL056W	1.23821
YDR514C	1.23531
YHR012W	1.23492
YLR386W	1.23343
YOR074C	1.23284
YNL152W	1.23146
YOR079C	1.23146
YNL309W	1.23086
YJL049W	1.22979
YGR216C	1.22921
YGL071W	1.22812
YER167W	1.22755
YDR092W	1.2259
YGR048W	1.22392
YMR199W	1.22339
YLR089C	1.22215
YGR003W	1.21991
YKL092C	1.21823
YDR072C	1.2175
YMR163C	1.21724
YHL007C	1.21658
YOR238W	1.21587
YNR023W	1.21583
YJL092W	1.21556
YDL149W	1.21483
YPL118W	1.21409
YGL036W	1.21303
YGR033C	1.21218
YDR466W	1.21136
YOR233W	1.20993
YHR058C	1.20904
YGR074W	1.20904
YML091C	1.20817
YPL141C	1.20533
YPR125W	1.20503
YDL164C	1.20429
YDR068W	1.20422
YDR069C	1.20286
YML127W	1.20284
YER161C	1.20174
YKL122C	1.20108
YGR031W	1.19978
YNR045W	1.19931
YJL137C	1.19809
YNL288W	1.19805
YNR024W	1.19637
YDR477W	1.19567
YGR156W	1.19519
YGR092W	1.19435
YDR289C	1.19414
YGL194C	1.19365
YOR226C	1.19289
YGR152C	1.192
YKL032C	1.19002
YGL061C	1.18983
YDR034C	1.18906
YMR053C	1.18813
YDR027C	1.18779
YNL053W	1.18617
YLR057W	1.18613
YDR303C	1.18273
YPL156C	1.18256
YDR204W	1.18077
YNL291C	1.18063
YDL227C	1.1804
YOR058C	1.1795
YPL092W	1.17771
YKL020C	1.17728
YMR177W	1.17556
YGL107C	1.17499
YPL138C	1.17475
YCL044C	1.17352
YDL203C	1.17064
YNL030W	1.16761
YLR088W	1.16657
YDL212W	1.16588
YKL203C	1.16495
YNL233W	1.1648
YPR147C	1.16313
YPR072W	1.16292
YGR040W	1.16244
YLR438C-A	1.16203
YKR011C	1.15904
YIL061C	1.15821
YKR024C	1.15785
YOR269W	1.15769
YOR260W	1.15688
YKL103C	1.15648
YJR090C	1.15605
YFL013C	1.15531
YBR246W	1.15232
YOL036W	1.15047
YJL047C	1.14989
YDR287W	1.14964
YHR181W	1.14803
YER008C	1.14747
YDL180W	1.14643
YMR197C	1.14421
YPR101W	1.14333
YGL144C	1.1428
YPL094C	1.14279
YHR005C	1.14228
YLR362W	1.14182
YLR387C	1.14148
YOR112W	1.14129
YBR207W	1.13854
YHR121W	1.13782
YAL017W	1.13767
YPR154W	1.13747
YPL133C	1.13615
YLR049C	1.13614
YIL079C	1.13537
YDR141C	1.13356
YOR307C	1.13337
YPL018W	1.13337
YNL164C	1.13196
YBR231C	1.13118
YBR095C	1.13069
YOR049C	1.13037
YER026C	1.13009
YDR109C	1.12789
YOR039W	1.12702
YJR144W	1.12699
YAL058W	1.12694
YGL014W	1.12685
YKL151C	1.12637
YLR003C	1.1262
YDR294C	1.12618
YDR145W	1.12497
YAL011W	1.12494
YGR271W	1.12477
YPL173W	1.12469
YJR110W	1.12316
YOR106W	1.12176
YGL059W	1.12164
YGR169C-A	1.12108
YKL208W	1.12071
YCR030C	1.12055
YCL014W	1.12034
YMR198W	1.12027
YER169W	1.1187
YOR360C	1.11621
YDR468C	1.1152
YNL129W	1.11466
YGR079W	1.11346
YKL179C	1.11297
YDL113C	1.11196
YOR359W	1.10975
YDR481C	1.10935
YGL209W	1.10783
YGR147C	1.10762
YDR244W	1.10676
YDR005C	1.10629
YBL055C	1.10606
YBR102C	1.1047
YJL110C	1.10434
YBL009W	1.10348
YGR247W	1.10127
YDR288W	1.10077
YDL240W	1.10007
YBR215W	1.10004
YBR132C	1.10001
YPL022W	1.09997
YFL008W	1.09863
YDR307W	1.09819
YER019C-A	1.09807
YLL038C	1.09807
YDR394W	1.09624
YHR114W	1.09559
YNR026C	1.0949
YPL057C	1.09476
YNL101W	1.09464
YMR047C	1.09301
YJR126C	1.0928
YGR091W	1.09259
YBL103C	1.092
YBR104W	1.09086
YJL087C	1.09007
YPL216W	1.08999
YIL067C	1.08998
YOL138C	1.08947
YDL077C	1.08904
YML121W	1.08837
YLR287C	1.08782
YNL215W	1.08623
YFL024C	1.08614
YGR084C	1.08568
YKR100C	1.08199
YKL174C	1.08094
YDR392W	1.07926
YBR192W	1.07896
YNL126W	1.07876
YBR077C	1.07855
YJR042W	1.07848
YBL035C	1.07813
YBR114W	1.07642
YGR077C	1.07589
YGL029W	1.07454
YBL107C	1.07418
YER072W	1.07362
YOR154W	1.0721
YJR124C	1.07131
YML088W	1.07109
YML007W	1.07097
YLR113W	1.06887
YDR462W	1.06831
YBR139W	1.06812
YBR042C	1.06535
YNL168C	1.06417
YLR276C	1.06378
YDL117W	1.06371
YKL139W	1.06323
YDR169C	1.06135
YNL065W	1.06072
YCR032W	1.05934
YDR153C	1.059
YNR047W	1.05749
YBR225W	1.05694
YDR163W	1.05657
YCL051W	1.05626
YPR079W	1.05607
YCL034W	1.05536
YKL022C	1.05478
YGR208W	1.05467
YDR213W	1.05392
YOR163W	1.05372
YDR531W	1.05361
YLR350W	1.05266
YMR019W	1.05265
YEL012W	1.05206
YKL100C	1.0518
YDR461W	1.05039
YPL174C	1.05004
YNL311C	1.04983
YDL178W	1.04913
YPL193W	1.04878
YIL106W	1.0482
YDR284C	1.04811
YBR058C	1.0479
YJL156C	1.04741
YKR077W	1.04697
YMR258C	1.04617
YIL090W	1.04606
YLR143W	1.04542
YHR102W	1.04471
YBR014C	1.04364
YKL155C	1.04308
YFL048C	1.04298
YJR138W	1.04068
YOR372C	1.04037
YMR210W	1.03964
YPL213W	1.03948
YHR009C	1.03911
YLR034C	1.03667
YNL180C	1.03648
YBL101C	1.03646
YOR093C	1.03552
YER176W	1.03476
YGR140W	1.03425
YKL040C	1.03413
YBR028C	1.03348
YPR032W	1.03345
YAR042W	1.03286
YNL044W	1.03282
YOR004W	1.03254
YIL154C	1.03176
YDL105W	1.03158
YBL106C	1.03118
YHR115C	1.0296
YLR241W	1.02958
YGL045W	1.02894
YNL068C	1.02849
YLR383W	1.02711
YPL140C	1.02598
YDR422C	1.02588
YPL188W	1.02502
YKL166C	1.02455
YOR363C	1.02438
YER029C	1.02361
YHR090C	1.02276
YLL041C	1.02269
YPL170W	1.02268
YNL169C	1.02237
YMR160W	1.02229
YER124C	1.02213
YIL112W	1.02153
YDR515W	1.02077
YAL053W	1.02021
YHR161C	1.02017
YGL248W	1.01877
YML017W	1.01844
YNL298W	1.01809
YIR023W	1.01793
YDR228C	1.01738
YBR119W	1.01561
YFL046W	1.0156
YPR178W	1.01533
YML130C	1.01522
YDL007W	1.01506
YOR236W	1.01441
YKL205W	1.01425
YJL149W	1.01357
YDR310C	1.01322
YOR274W	1.01292
YNR007C	1.0122
YER151C	1.01144
YOR342C	1.01029
YBL093C	1.01018
YOR173W	1.00975
YJL186W	1.00966
YML102W	1.00965
YJL069C	1.00951
YKL008C	1.00886
YER064C	1.00674
YHL002W	1.0062
YBR275C	1.00596
YGL066W	1.00563
YKL108W	1.00554
YJR092W	1.00408
YOL125W	1.00324
YIL147C	1.0029
YDR451C	1.00162
YPL082C	1.0009
YIL143C	1
YCL027W	0.997986
YKL098W	0.996599
YER147C	0.996345
YNL075W	0.996301
YDR195W	0.995107
YKR099W	0.994664
YPL219W	0.994218
YGR056W	0.993663
YBR179C	0.993115
YDR443C	0.992525
YDR291W	0.990545
YNL029C	0.9889
YLR373C	0.988421
YGL210W	0.987862
YJL115W	0.987659
YNL153C	0.986731
YOR194C	0.986005
YAL030W	0.985602
YDR264C	0.985542
YBR217W	0.985327
YCL008C	0.984794
YDR296W	0.984312
YER020W	0.984078
YGR002C	0.983763
YLR178C	0.983518
YGL067W	0.983422
YNL062C	0.983401
YOR249C	0.982997
YPL270W	0.982997
YBR281C	0.982728
YDL056W	0.982415
YJR013W	0.982107
YGR024C	0.981719
YGR283C	0.981688
YNL051W	0.981244
YDR277C	0.980092
YPL011C	0.979926
YNL323W	0.979804
YLR436C	0.979604
YDR103W	0.979528
YLR430W	0.978994
YHR072W-A	0.978694
YBR151W	0.97841
YMR075W	0.97837
YBR083W	0.977952
YPR034W	0.977492
YPL202C	0.977188
YNL076W	0.977076
YJL062W	0.976635
YPR171W	0.976309
YJL065C	0.975949
YBR105C	0.975398
YLL039C	0.974249
YDR339C	0.973847
YNL218W	0.972913
YOR164C	0.972466
YGR188C	0.971653
YOR354C	0.97126
YOR212W	0.971203
YNL107W	0.970367
YBR257W	0.96929
YDR405W	0.969243
YNR027W	0.969164
YEL055C	0.969048
YHR061C	0.968403
YLR413W	0.96731
YLR219W	0.967155
YDR334W	0.966246
YBR255W	0.965499
YLR033W	0.965328
YNL155W	0.963961
YOR118W	0.963885
YIL026C	0.963769
YDR104C	0.963713
YHR142W	0.962359
YIR002C	0.962272
YJL061W	0.961603
YJL104W	0.960712
YNL001W	0.960582
YIL002W-A	0.960376
YEL013W	0.96035
YCR011C	0.959585
YJL073W	0.959393
YMR064W	0.959351
YNL229C	0.958087
YER056C	0.957886
YMR273C	0.956997
YOL096C	0.955545
YPR140W	0.954207
YMR226C	0.953994
YDL167C	0.953084
YJR006W	0.952787
YPR081C	0.951111
YOR205C	0.950804
YHR204W	0.94972
YDR359C	0.949642
YDL080C	0.949576
YDR049W	0.948997
YGL176C	0.948542
YDL175C	0.948501
YPL180W	0.947459
YAL013W	0.947432
YMR110C	0.94716
YOR191W	0.946964
YLL004W	0.946936
YHR052W	0.946724
YMR128W	0.94565
YML034W	0.945285
YDR330W	0.94469
YDL155W	0.944155
YFL016C	0.94338
YJR031C	0.942857
YOR156C	0.942767
YPL020C	0.942237
YGL113W	0.942193
YMR044W	0.941972
YDR210W	0.941274
YDR283C	0.94098
YGL056C	0.940002
YER075C	0.939563
YDR207C	0.939404
YML112W	0.939172
YCR082W	0.938372
YPL256C	0.937921
YAL051W	0.937875
YGR009C	0.935924
YNL312W	0.935757
YDR389W	0.935606
YER090W	0.935179
YMR048W	0.935014
YLR078C	0.934447
YKL038W	0.934037
YGR005C	0.932514
YOR119C	0.932352
YBL042C	0.932042
YCR073C	0.931296
YLR001C	0.931177
YPR141C	0.930831
YOR160W	0.930334
YPR109W	0.93
YOR098C	0.929804
YDL010W	0.929681
YPR185W	0.929593
YHR085W	0.92943
YKL033W	0.929274
YOL082W	0.928466
YDR460W	0.9279
YIL108W	0.927544
YOR346W	0.927302
YNL127W	0.92626
YLR022C	0.926173
YPL084W	0.926002
YDR046C	0.925866
YKL198C	0.925309
YBR069C	0.925149
YML111W	0.924483
YJL112W	0.923403
YLR216C	0.923234
YKR089C	0.922869
YDR456W	0.922741
YOR223W	0.922074
YKL052C	0.919403
YJL165C	0.918371
YFR040W	0.917745
YGR026W	0.917033
YKL135C	0.916515
YDR309C	0.91605
YBR200W	0.915996
YNL161W	0.915677
YJL203W	0.915567
YCR033W	0.915351
YHR164C	0.915344
YKR002W	0.915269
YBL016W	0.914816
YBR187W	0.914452
YOR123C	0.914151
YOR061W	0.91258
YLR210W	0.911915
YGR278W	0.911775
YGR220C	0.910014
YLR228C	0.909854
YLR180W	0.909528
YGR142W	0.909407
YAL001C	0.908535
YOR081C	0.908484
YPL246C	0.906991
YBL005W	0.906607
YBR290W	0.906143
YBR081C	0.905943
YDL173W	0.905728
YOL107W	0.905241
YPL178W	0.903743
YGL237C	0.903734
YCR061W	0.903003
YLR223C	0.901381
YJL128C	0.901297
YMR119W	0.900887
YMR100W	0.900676
YGR161C	0.900571
YER077C	0.900431
YDR479C	0.90038
YGL038C	0.899392
YJR052W	0.898727
YDR151C	0.898622
YEL043W	0.898051
YCR081W	0.897726
YJL084C	0.897507
YMR168C	0.897291
YEL064C	0.897189
YOR353C	0.897186
YHR084W	0.896896
YBR017C	0.896469
YOR124C	0.896373
YLR192C	0.895718
YDR061W	0.895633
YPR104C	0.895475
YBR112C	0.89527
YOL062C	0.895244
YDL020C	0.893802
YAR015W	0.893379
YNL183C	0.893189
YER093C	0.893019
YNL176C	0.892805
YFL009W	0.892234
YNL024C-A	0.891868
YIR033W	0.890534
YLR459W	0.89047
YDR186C	0.890156
YOR304W	0.890094
YBR060C	0.89002
YKR021W	0.890005
YBR055C	0.889951
YGR237C	0.889642
YAL060W	0.889434
YLR260W	0.889115
YDL047W	0.888701
YJR025C	0.88803
YER141W	0.887868
YBR172C	0.887752
YLR025W	0.887383
YML109W	0.887229
YCR048W	0.887221
YNL305C	0.886315
YML032C	0.885783
YMR188C	0.885265
YDR378C	0.884495
YML081W	0.884466
YJL155C	0.884345
YNL294C	0.882845
YIL030C	0.882358
YPR170W-B	0.881294
YKR090W	0.881273
YJL063C	0.880062
YBR131W	0.87972
YIL111W	0.879711
YPL032C	0.879111
YOL077C	0.878539
YGL163C	0.878384
YDR444W	0.877886
YNL223W	0.87721
YPL203W	0.877088
YOR175C	0.876219
YER092W	0.875954
YER143W	0.875597
YJL002C	0.875453
YNR021W	0.874476
YPR052C	0.874456
YCR069W	0.873372
YLR102C	0.872968
YMR237W	0.872962
YDR333C	0.872789
YLR247C	0.872576
YGR231C	0.872566
YOR290C	0.872418
YLL012W	0.872116
YDR495C	0.871344
YJR060W	0.87108
YLL013C	0.870331
YPR045C	0.869351
YLR021W	0.868377
YDR524C	0.868121
YMR301C	0.866523
YMR090W	0.866391
YGR255C	0.865937
YDR214W	0.865935
YOR281C	0.865534
YLR238W	0.864529
YDL076C	0.864055
YKL116C	0.864031
YLR336C	0.863505
YFR019W	0.863284
YLR399C	0.863212
YLR310C	0.863015
YOL126C	0.862216
YPR149W	0.862062
YLL051C	0.861922
YOR232W	0.860477
YDR323C	0.860349
YMR024W	0.859783
YLR332W	0.859511
YOL069W	0.859328
YMR216C	0.85889
YLR285W	0.858842
YHL013C	0.858707
YBR142W	0.858694
YNL283C	0.858117
YLR353W	0.857568
YLL036C	0.85717
YGR257C	0.857031
YKL074C	0.856193
YPR095C	0.856002
YJL148W	0.855375
YMR089C	0.855146
YPL083C	0.855094
YNL135C	0.855054
YJL140W	0.854462
YDR475C	0.853748
YDR113C	0.853677
YHR111W	0.853652
YJL030W	0.853457
YPR088C	0.853441
YKL059C	0.853004
YCL039W	0.85275
YBL085W	0.85261
YLR115W	0.852186
YLR051C	0.852052
YKL028W	0.852002
YHR155W	0.851656
YGR280C	0.851303
YNL297C	0.851156
YPR176C	0.850786
YPL075W	0.850639
YMR200W	0.850574
YIL097W	0.850182
YJR099W	0.849748
YML062C	0.849149
YKR029C	0.84852
YHR154W	0.848514
YLL054C	0.848175
YLR389C	0.847625
YNL103W	0.847485
YJL133W	0.847175
YHR166C	0.846847
YOR140W	0.846339
YLR006C	0.846322
YLL029W	0.846044
YOR220W	0.845888
YIL093C	0.845565
YML018C	0.844936
YBR030W	0.844731
YKL146W	0.844536
YHR187W	0.844458
YPR022C	0.844403
YDL182W	0.84395
YKR038C	0.843938
YML117W	0.843829
YML120C	0.84297
YPL247C	0.84293
YLR274W	0.84239
YNL054W	0.839789
YNL118C	0.839042
YCL036W	0.838779
YLL028W	0.838438
YNL084C	0.837723
YHR030C	0.837462
YDL092W	0.837395
YOR287C	0.837282
YOR279C	0.837249
YOR087W	0.837182
YDR358W	0.837077
YHR073W	0.836863
YGR179C	0.836809
YDL224C	0.836289
YHR088W	0.836072
YIL129C	0.835804
YNL097C	0.835533
YGR013W	0.835239
YIL031W	0.83485
YPL111W	0.834483
YDR257C	0.834096
YDR448W	0.833232
YDR449C	0.832725
YOR035C	0.83245
YFL033C	0.831799
YOR250C	0.831672
YEL017W	0.83127
YNL261W	0.831215
YOR245C	0.830581
YPL086C	0.830361
YMR122W-A	0.830317
YPL132W	0.830298
YPL068C	0.83028
YNL248C	0.830075
YJL005W	0.830045
YKR092C	0.829866
YNL253W	0.829758
YIL159W	0.829744
YIL104C	0.829483
YMR010W	0.829307
YDL116W	0.82879
YNL267W	0.828699
YDR388W	0.828318
YNL238W	0.827468
YGR127W	0.827283
YKL120W	0.826972
YNL299W	0.826437
YIL019W	0.826394
YGL196W	0.826345
YML075C	0.826284
YNL326C	0.825701
YCL037C	0.825468
YKL014C	0.82369
YOR217W	0.82349
YJL125C	0.822736
YGR119C	0.822454
YGR044C	0.821067
YHR117W	0.820795
YHR169W	0.820067
YCL024W	0.819925
YLL063C	0.819823
YNL050C	0.819553
YEL052W	0.819461
YGL178W	0.818887
YKR088C	0.818651
YNL047C	0.817405
YLL021W	0.816269
YBR068C	0.816214
YPL242C	0.815586
YGR078C	0.815535
YDL088C	0.814996
YDR463W	0.814902
YJR054W	0.814762
YJL036W	0.814372
YKL063C	0.813948
YKR003W	0.813902
YDR436W	0.813848
YKL079W	0.81384
YOR267C	0.813686
YBL069W	0.813579
YGL186C	0.813418
YMR236W	0.813345
YLR414C	0.813144
YMR124W	0.813073
YGR250C	0.812866
YDL135C	0.812825
YML099C	0.812692
YIL130W	0.812253
YOR129C	0.812246
YJL189W	0.812238
YLR253W	0.81218
YLL002W	0.81182
YKR026C	0.811503
YOR065W	0.811299
YHR076W	0.811104
YOR273C	0.810699
YDL134C	0.81049
YOL010W	0.810486
YMR171C	0.809977
YER032W	0.809816
YBR265W	0.809151
YDL127W	0.80877
YCL031C	0.808407
YGL086W	0.807939
YPR029C	0.807463
YPR189W	0.807036
YPL168W	0.806901
YMR043W	0.806515
YDL087C	0.806424
YBL031W	0.80627
YLR072W	0.80605
YNR051C	0.805781
YPR169W	0.80545
YBR101C	0.804944
YNL213C	0.80489
YOR073W	0.804837
YLR015W	0.804223
YHR065C	0.803829
YBR073W	0.803729
YDR089W	0.803644
YIR025W	0.803483
YDR416W	0.80324
YDR486C	0.803042
YGR141W	0.80282
YIL128W	0.802558
YIL105C	0.802509
YDL233W	0.802199
YKL160W	0.802029
YHR007C	0.801699
YNL182C	0.8013
YOL054W	0.800781
YBL022C	0.800693
YGR198W	0.799615
YJL157C	0.799166
YPR186C	0.798995
YMR061W	0.798718
YPR159W	0.798488
YEL060C	0.798481
YHL031C	0.798043
YGR063C	0.797518
YGR241C	0.796944
YGL082W	0.7966
YLR002C	0.795918
YKL017C	0.79498
YNL091W	0.794958
YPL169C	0.794842
YOR157C	0.794716
YGR267C	0.794399
YLR357W	0.794275
YLR095C	0.794161
YGL006W	0.794161
YLR144C	0.794019
YFR015C	0.79383
YLR283W	0.79366
YNL157W	0.792887
YBL011W	0.792858
YGL257C	0.792656
YER172C	0.792623
YKL173W	0.792318
YDR472W	0.791834
YFL021W	0.791338
YBR171W	0.791307
YFR050C	0.78988
YLR455W	0.789666
YJL207C	0.788062
YGR041W	0.788008
YPL064C	0.787926
YML058W	0.787636
YHR200W	0.787532
YER144C	0.787235
YMR247C	0.786923
YOR301W	0.786661
YBR205W	0.785958
YPR143W	0.785852
YOR145C	0.785575
YOR347C	0.785497
YLR007W	0.784727
YDR081C	0.784681
YDR212W	0.784542
YNL236W	0.784489
YNL206C	0.784184
YJR091C	0.783904
YDL070W	0.783894
YFL027C	0.783504
YLL010C	0.783424
YOL057W	0.782763
YKL078W	0.782607
YDL001W	0.782528
YGL216W	0.782127
YHR069C	0.781952
YGR165W	0.781794
YMR195W	0.781007
YDR390C	0.780393
YJL164C	0.779967
YIL048W	0.779301
YHR062C	0.778695
YOL051W	0.778246
YMR213W	0.777973
YKL185W	0.77793
YMR049C	0.777869
YMR165C	0.777515
YKL004W	0.775608
YOR011W	0.775481
YER030W	0.77532
YLR321C	0.774623
YHR190W	0.773575
YBR072W	0.773382
YML038C	0.772624
YJR140C	0.772027
YGR150C	0.771881
YDR372C	0.771867
YLR099C	0.77113
YBL058W	0.770924
YGR082W	0.770914
YML080W	0.769368
YDR251W	0.769095
YHR070W	0.768487
YNL201C	0.768325
YHR050W	0.767891
YHR018C	0.767829
YGL246C	0.767764
YPR075C	0.76757
YPR051W	0.767544
YLR195C	0.76728
YKR087C	0.76703
YDR351W	0.766814
YHL025W	0.766622
YOL068C	0.766587
YLR084C	0.766428
YMR191W	0.76628
YMR032W	0.766237
YLR231C	0.765605
YNL032W	0.765492
YKR064W	0.765311
YCL001W	0.765214
YKR065C	0.764638
YGR132C	0.764485
YDR336W	0.764163
YLR257W	0.762812
YER140W	0.762515
YFR032C-A	0.76248
YDR398W	0.762395
YDR152W	0.762368
YOR221C	0.762367
YLR018C	0.762348
YMR098C	0.76199
YML006C	0.761955
YGL208W	0.761041
YPR008W	0.760715
YER105C	0.760324
YDR057W	0.759494
YOR337W	0.7585
YJR084W	0.757905
YNL265C	0.757819
YFR041C	0.757773
YJL187C	0.757564
YDR338C	0.757547
YJR062C	0.757025
YGL044C	0.756639
YGR065C	0.756195
YKR018C	0.756106
YKL149C	0.755843
YDR021W	0.755803
YDR171W	0.75558
YNR003C	0.754654
YJL070C	0.754645
YDR240C	0.754071
YLR028C	0.75377
YPL049C	0.752786
YCR026C	0.75244
YOR153W	0.752003
YHL003C	0.75179
YGL003C	0.751619
YER013W	0.751617
YDR377W	0.751339
YDR227W	0.750741
YLR138W	0.750527
YPL152W	0.750053
YNL301C	0.750032
YBL010C	0.749845
YCL057W	0.749699
YGL143C	0.749557
YDL072C	0.749389
YNL066W	0.748529
YDL166C	0.747917
YMR111C	0.747725
YKL129C	0.747539
YMR026C	0.746868
YEL006W	0.746829
YIL036W	0.746318
YDR266C	0.746036
YOR033C	0.745863
YJR112W	0.745735
YJR093C	0.745555
YDR164C	0.745307
YOR368W	0.744706
YBR108W	0.74443
YOL004W	0.744078
YIL144W	0.743461
YGL073W	0.743033
YNR038W	0.742909
YKL089W	0.742807
YPR164W	0.742419
YBL084C	0.742337
YDL053C	0.741567
YOL144W	0.741512
YOL123W	0.741493
YDR379W	0.741481
YMR054W	0.740871
YGL221C	0.740824
YDR020C	0.740764
YBL072C	0.739845
YJR064W	0.738883
YBR149W	0.738764
YOR259C	0.738658
YPL177C	0.737643
YPR021C	0.737328
YKR086W	0.736251
YDR539W	0.736236
YNL102W	0.735949
YCR092C	0.735715
YLR207W	0.735327
YKL010C	0.735185
YLR410W	0.73499
YMR231W	0.734912
YAL042W	0.734863
YNL251C	0.734785
YNL293W	0.73453
YKR010C	0.733573
YKR014C	0.733151
YNL286W	0.732931
YBL097W	0.732922
YER022W	0.732848
YBR123C	0.732559
YDR181C	0.732492
YER062C	0.732449
YPL155C	0.73228
YAL016W	0.731635
YBR283C	0.7315
YML053C	0.731462
YBR066C	0.731289
YHR077C	0.731073
YPL243W	0.731066
YOR089C	0.730681
YDR234W	0.730612
YBL056W	0.730562
YBR009C	0.73008
YDR311W	0.730066
YFL004W	0.729481
YDL190C	0.729052
YJR001W	0.728893
YJL029C	0.728477
YNL284C	0.728139
YMR305C	0.728033
YPR065W	0.728024
YPR031W	0.727513
YPL110C	0.726883
YMR314W	0.726873
YJL079C	0.726127
YMR264W	0.726073
YDR189W	0.726066
YBL102W	0.725994
YIL135C	0.725725
YPR118W	0.725667
YPL105C	0.725354
YDR098C	0.72446
YLR225C	0.723582
YDR499W	0.723398
YIL149C	0.722737
YDR222W	0.722682
YJL129C	0.722374
YOR195W	0.722047
YIL138C	0.72125
YFR047C	0.720814
YFL007W	0.720577
YDR502C	0.720548
YGL004C	0.719918
YPL259C	0.719861
YFR034C	0.719329
YML065W	0.719125
YNL268W	0.7178
YAL019W	0.717405
YBR159W	0.717152
YOL041C	0.716881
YGR100W	0.716808
YPR127W	0.716709
YOR132W	0.716373
YJR005W	0.716094
YAL015C	0.715905
YLL040C	0.715867
YCR008W	0.715866
YLR063W	0.715788
YGL211W	0.715748
YDR074W	0.715284
YDR397C	0.714762
YAL039C	0.714603
YIL077C	0.714494
YOL078W	0.714387
YOR283W	0.714186
YHR023W	0.713757
YPR135W	0.713636
YOL019W	0.713211
YNL257C	0.713
YPL009C	0.712864
YMR136W	0.712236
YBR274W	0.710263
YGR184C	0.710208
YKL167C	0.709944
YJR014W	0.709922
YLR397C	0.708112
YDR174W	0.707763
YDL045C	0.707723
YLR256W	0.707362
YGL164C	0.707083
YMR275C	0.706936
YGL227W	0.70647
YBR122C	0.706347
YER047C	0.70617
YGR277C	0.706106
YNL292W	0.705686
YGL201C	0.704547
YGL197W	0.703573
YCR088W	0.703481
YOL087C	0.703478
YCR023C	0.70333
YBL006C	0.703144
YJR043C	0.702836
YNL221C	0.702763
YNL004W	0.702593
YNL130C	0.702419
YMR270C	0.702416
YLR024C	0.702412
YMR139W	0.702053
YKL043W	0.701845
YKR079C	0.701252
YNL080C	0.701223
YFR014C	0.700364
YLR270W	0.699989
YGL013C	0.698765
YPL196W	0.698655
YML043C	0.698164
YHR001W	0.697696
YKR072C	0.697545
YAL059W	0.69683
YJL143W	0.696357
YLR079W	0.695664
YNL330C	0.695575
YMR162C	0.69543
YGR149W	0.69527
YAL044C	0.694956
YBL038W	0.694914
YPL006W	0.69456
YOL147C	0.693465
YCL052C	0.693076
YMR218C	0.692965
YLR190W	0.692818
YMR190C	0.692465
YFR003C	0.692186
YER017C	0.692169
YLR126C	0.691698
YDR011W	0.691605
YOR370C	0.691468
YDR457W	0.691191
YER114C	0.691063
YIL084C	0.690905
YPL129W	0.690882
YBR061C	0.690584
YGR055W	0.69046
YOL052C	0.690188
YCR028C-A	0.690135
YNL045W	0.689781
YKL195W	0.688818
YER113C	0.688106
YPR160W	0.687778
YER145C	0.687282
YDR465C	0.686352
YPL013C	0.685781
YOR080W	0.685764
YDR348C	0.685539
YDR298C	0.685427
YCR004C	0.685318
YLR183C	0.685276
YOR038C	0.685262
YGR086C	0.684675
YDL234C	0.684664
YMR219W	0.684327
YPL120W	0.68423
YDR458C	0.68423
YMR011W	0.683846
YMR261C	0.683252
YDR232W	0.683141
YKR056W	0.68256
YOR261C	0.682389
YDR411C	0.681803
YLR120C	0.680903
YHR082C	0.680124
YKL112W	0.679679
YLR421C	0.679337
YPR139C	0.678329
YMR183C	0.678072
YNL227C	0.677765
YNL329C	0.677573
YGL173C	0.677127
YGL181W	0.676454
YBR248C	0.676356
YGL203C	0.676295
YDR062W	0.675751
YOR219C	0.675726
YIL009C-A	0.67564
YDL189W	0.675185
YGL112C	0.675155
YDR350C	0.674996
YDR176W	0.673904
YML114C	0.673516
YOR101W	0.672618
YGR235C	0.672457
YML106W	0.672333
YDR175C	0.672122
YDR144C	0.670804
YGR186W	0.670746
YHR118C	0.67074
YGR187C	0.669403
YMR102C	0.668794
YOR380W	0.668371
YBR237W	0.668333
YMR079W	0.668301
YMR212C	0.667398
YDR097C	0.667221
YDR130C	0.666833
YOR054C	0.666642
YLR320W	0.666305
YPL104W	0.666305
YGR170W	0.665131
YHR097C	0.66464
YDR035W	0.664517
YJL204C	0.664509
YOR023C	0.664465
YOR213C	0.664359
YMR014W	0.664325
YGL160W	0.664319
YKL204W	0.663656
YLR440C	0.663001
YBL068W	0.662567
YMR189W	0.661672
YDR301W	0.660992
YJL039C	0.660964
YAL024C	0.660453
YNL313C	0.660012
YKL164C	0.659803
YBR007C	0.659676
YLR351C	0.659524
YCR016W	0.659398
YHL004W	0.659299
YGL131C	0.659232
YKR025W	0.659088
YJL200C	0.658886
YDL161W	0.658344
YMR001C	0.657863
YER087C-B	0.657519
YHR040W	0.657474
YPL074W	0.657021
YML013W	0.656622
YBL054W	0.656507
YCR065W	0.656197
YOR383C	0.655969
YDR132C	0.655231
YHR104W	0.654275
YCL005W-A	0.654064
YML061C	0.652457
YLR248W	0.652367
YFL026W	0.652313
YDR052C	0.652131
YIL033C	0.650923
YNR055C	0.650918
YLR027C	0.650656
YKL183W	0.650359
YPL058C	0.650244
YNL317W	0.650088
YJL122W	0.649758
YPR011C	0.64934
YLR055C	0.649333
YLR071C	0.649333
YLR330W	0.647765
YER130C	0.647743
YDL051W	0.647731
YAL029C	0.647679
YPR105C	0.647576
YLR419W	0.646368
YFR038W	0.645412
YBR244W	0.64515
YPR091C	0.644722
YPR056W	0.644327
YDR105C	0.644259
YGL233W	0.643578
YNL124W	0.643559
YNL154C	0.643428
YPR023C	0.643369
YLR300W	0.643357
YGL048C	0.643183
YPR089W	0.642985
YNL287W	0.642326
YPR155C	0.641788
YOR066W	0.641728
YDL002C	0.641554
YLR371W	0.641288
YMR291W	0.641218
YEL036C	0.640593
YHR032W	0.640573
YML031W	0.640272
YLR100W	0.639796
YMR129W	0.639616
YNL262W	0.639318
YML021C	0.638919
YNR017W	0.638582
YER132C	0.638221
YCR035C	0.638162
YFL028C	0.63812
YDR365C	0.637938
YGR223C	0.637788
YNL023C	0.637779
YJR101W	0.637663
YMR108W	0.636395
YBR056W	0.636373
YHR089C	0.63551
YDL168W	0.635418
YPR148C	0.635189
YKL057C	0.635127
YDR517W	0.634559
YOR315W	0.633754
YBR087W	0.632812
YKL006W	0.632748
YEL065W	0.632695
YGR097W	0.632497
YDR356W	0.632294
YFR018C	0.63167
YIR001C	0.631647
YFL042C	0.631463
YIL021W	0.631295
YGR258C	0.631091
YLR086W	0.631049
YKL201C	0.631009
YLR412W	0.630727
YML125C	0.630395
YLR059C	0.629438
YER083C	0.629002
YBR212W	0.628839
YER014W	0.628516
YPR024W	0.627856
YCR017C	0.627285
YKL045W	0.627269
YNR011C	0.627256
YBR015C	0.625916
YNL022C	0.625735
YGL206C	0.625285
YPL151C	0.625119
YHR047C	0.62492
YMR265C	0.62426
YCL028W	0.623629
YOL056W	0.623612
YMR016C	0.623276
YLR347C	0.622931
YDL150W	0.622859
YBR029C	0.622851
YJL210W	0.622802
YNL327W	0.622161
YDR316W	0.6215
YHR006W	0.621477
YDR003W	0.621176
YDR221W	0.621048
YBR289W	0.620635
YLR172C	0.620618
YPR124W	0.620296
YPR010C	0.620093
YAR002W	0.619632
YDL106C	0.618767
YDR036C	0.618539
YJR113C	0.618286
YPL195W	0.617432
YDR280W	0.617117
YLR131C	0.617086
YNL177C	0.616903
YDR238C	0.616559
YDR075W	0.616295
YDL004W	0.615781
YHR146W	0.615403
YPL225W	0.615398
YIL092W	0.614975
YLR305C	0.614621
YOR069W	0.61461
YLL048C	0.613788
YAL047C	0.6137
YDL086W	0.613635
YLR077W	0.613177
YDL063C	0.613079
YDL073W	0.612913
YGL215W	0.612817
YGR276C	0.612728
YOR336W	0.612549
YEL063C	0.612327
YOL158C	0.612094
YLR090W	0.612064
YDR507C	0.611333
YPR191W	0.611247
YKL219W	0.610674
YGR211W	0.609158
YKR095W	0.609151
YPR188C	0.608913
YPL010W	0.608622
YGL220W	0.608171
YDL042C	0.606917
YNL278W	0.606845
YPL048W	0.606812
YDL153C	0.606793
YKR019C	0.606704
YLR272C	0.606461
YKL085W	0.606309
YHR186C	0.605713
YML093W	0.605683
YCR024C-B	0.605243
YGR060W	0.605016
YLR368W	0.604793
YNL308C	0.604758
YKL067W	0.604694
YIL002C	0.604542
YLL035W	0.60442
YCR052W	0.60438
YGR252W	0.604289
YOR356W	0.604277
YPL212C	0.604203
YKL190W	0.60414
YDR335W	0.603964
YDL048C	0.603459
YGL200C	0.603296
YER068W	0.602417
YDR345C	0.602381
YIL131C	0.602341
YGR008C	0.601195
YMR022W	0.60117
YGL167C	0.600438
YOL135C	0.600171
YDR206W	0.600128
YOR317W	0.600092
YBR267W	0.600005
YDR083W	0.599688
YKL023C-A	0.59941
YML059C	0.598954
YCL011C	0.598914
YNL219C	0.598816
YIR034C	0.598656
YHR201C	0.598565
YBR160W	0.598522
YNL002C	0.598515
YPL230W	0.598439
YCR034W	0.598437
YOL021C	0.598297
YDR384C	0.597586
YOR047C	0.597307
YNR008W	0.597249
YLR166C	0.597204
YAL061W	0.596991
YMR008C	0.59698
YHR135C	0.596959
YIL095W	0.595767
YML057W	0.595135
YNL125C	0.594516
YML008C	0.594067
YDR415C	0.593989
YNR033W	0.593651
YFL034C-B	0.593222
YFL002C	0.593082
YJL151C	0.592601
YOL115W	0.592573
YMR220W	0.592548
YFR029W	0.592362
YDL015C	0.592361
YCL025C	0.592269
YDR362C	0.591804
YMR289W	0.59177
YPL023C	0.591195
YBL064C	0.59116
YOL063C	0.590971
YNL273W	0.59082
YIL126W	0.590396
YMR120C	0.590113
YDR452W	0.590022
YHR167W	0.589949
YJL081C	0.589924
YNL106C	0.589841
YDR158W	0.589816
YML048W	0.589622
YPR097W	0.589227
YJL050W	0.589212
YGL040C	0.588668
YDR410C	0.588085
YJR117W	0.587799
YER107C	0.58764
YMR257C	0.587245
YLR186W	0.586745
YGR083C	0.586265
YHR066W	0.585825
YBR261C	0.585819
YLR301W	0.585457
YKL104C	0.584354
YIL017C	0.584034
YOR299W	0.583796
YDR044W	0.583752
YMR109W	0.583684
YGL091C	0.582959
YHL019C	0.582916
YNL123W	0.582905
YBR074W	0.582893
YER091C	0.582862
YBR082C	0.582576
YOR362C	0.582068
YLR214W	0.581571
YBR165W	0.581494
YBR046C	0.581133
YIL047C	0.581028
YKL213C	0.58039
YBR125C	0.580356
YDL147W	0.580175
YLR429W	0.579517
YIL151C	0.579202
YGL030W	0.578946
YPR004C	0.578626
YKL064W	0.578316
YPR035W	0.577977
YOL027C	0.577848
YOL072W	0.577355
YDL137W	0.577112
YGL075C	0.576799
YFR037C	0.57674
YGL187C	0.576652
YOR006C	0.576271
YGR130C	0.576045
YGL035C	0.574971
YML103C	0.574967
YLR199C	0.574802
YLR163C	0.57436
YNL156C	0.574127
YLR450W	0.574035
YFR006W	0.573959
YFR013W	0.57349
YHR003C	0.573281
YGR007W	0.573086
YHR132W-A	0.57294
YBR140C	0.57243
YNL321W	0.572277
YMR092C	0.571783
YJR083C	0.571374
YNL173C	0.571019
YCL035C	0.57095
YBR059C	0.570766
YIR008C	0.570633
YCL064C	0.57045
YGR145W	0.570186
YGR210C	0.569641
YHR143W-A	0.569616
YBR130C	0.569609
YDR508C	0.569276
YJR148W	0.568757
YNL166C	0.568656
YOR332W	0.56839
YBL041W	0.56839
YAR027W	0.567978
YIL083C	0.567576
YKL082C	0.56747
YER173W	0.567394
YBR037C	0.567127
YNR013C	0.567009
YDR205W	0.566932
YDL018C	0.566698
YFR009W	0.566036
YBR166C	0.565891
YIL121W	0.565767
YDL005C	0.565767
YGR196C	0.565691
YOL098C	0.565613
YLR422W	0.565354
YHR206W	0.564849
YJR035W	0.564524
YPR181C	0.564079
YNL148C	0.563938
YCR067C	0.563896
YDR093W	0.563312
YGR116W	0.56284
YPL265W	0.562371
YIL069C	0.562351
YDL132W	0.56218
YGL130W	0.561922
YOL100W	0.561828
YBR264C	0.561656
YMR076C	0.561531
YBR109C	0.561317
YIL117C	0.560717
YMR106C	0.559683
YOR165W	0.559054
YJL139C	0.558959
YGR246C	0.558245
YOR371C	0.558061
YKR080W	0.557683
YHL017W	0.55707
YMR299C	0.556795
YPL263C	0.556436
YDR037W	0.55639
YGR202C	0.556212
YOR059C	0.556054
YOL001W	0.556031
YPR102C	0.55555
YEL037C	0.555533
YHR027C	0.55549
YDL102W	0.55534
YLR449W	0.555123
YDL208W	0.55512
YDR276C	0.554243
YFL038C	0.553807
YNL306W	0.553802
YKL101W	0.553692
YHR026W	0.55341
YMR077C	0.552877
YLR372W	0.552156
YOR324C	0.551682
YER006W	0.550972
YGL223C	0.550898
YMR215W	0.550689
YEL007W	0.550636
YKL171W	0.550506
YDR165W	0.55042
YDR505C	0.549808
YMR031C	0.549624
YOR067C	0.549609
YIL075C	0.549585
YLR299W	0.549219
YPL039W	0.548508
YDR107C	0.548437
YMR166C	0.548302
YGL119W	0.548166
YCR057C	0.548121
YBR214W	0.547407
YDL097C	0.547322
YJR041C	0.546948
YMR131C	0.546229
YPR138C	0.546059
YFR030W	0.545579
YBL023C	0.543941
YPL249C	0.543755
YJL197W	0.54375
YBR053C	0.54336
YJL019W	0.54319
YOR224C	0.542946
YFL034C-A	0.542597
YDL225W	0.542402
YOR056C	0.542344
YIL043C	0.542304
YBL090W	0.542133
YHR031C	0.541766
YEL042W	0.541157
YGL062W	0.540743
YKL117W	0.540309
YOR076C	0.540209
YGL025C	0.539931
YER095W	0.539435
YJL174W	0.539384
YJL201W	0.539283
YPL030W	0.539227
YOR127W	0.539166
YDR395W	0.539108
YML041C	0.538667
YOL007C	0.538162
YNL258C	0.537951
YDR086C	0.537848
YOR018W	0.537481
YML096W	0.536903
YLR206W	0.536802
YIR006C	0.536606
YNL246W	0.536415
YOR043W	0.536176
YER120W	0.535706
YGR099W	0.535306
YNL151C	0.534763
YGR274C	0.534102
YPL019C	0.533778
YOR155C	0.5334
YGR251W	0.533179
YBR096W	0.533146
YLR096W	0.532994
YIL034C	0.532992
YDL028C	0.532057
YML010W	0.531865
YDR150W	0.531644
YHL040C	0.531633
YLR196W	0.531471
YJL097W	0.531454
YOR052C	0.531075
YNL186W	0.530113
YPL235W	0.530007
YNL003C	0.529275
YBR016W	0.528901
YMR246W	0.528562
YNL132W	0.528467
YNR052C	0.528249
YNL241C	0.528146
YGR227W	0.528009
YOR138C	0.52796
YHL035C	0.527694
YDR119W	0.527613
YDL142C	0.527145
YNL263C	0.5271
YKL021C	0.527085
YOR272W	0.526747
YPR018W	0.526018
YDR208W	0.525847
YIR003W	0.525602
YML012W	0.52551
YDL197C	0.525317
YOL003C	0.525278
YFR027W	0.525003
YGL151W	0.524885
YDR480W	0.524134
YHR205W	0.523286
YDL179W	0.523192
YLR333C	0.522933
YKR082W	0.522862
YLR319C	0.522507
YJL041W	0.522468
YDR211W	0.521964
YER004W	0.521625
YGR245C	0.521549
YNR019W	0.521234
YBR158W	0.521014
YMR179W	0.520772
YLR258W	0.520563
YAL005C	0.520354
YNL137C	0.520249
YNL078W	0.520177
YNL081C	0.520062
YNL011C	0.51973
YER103W	0.519161
YNR035C	0.519068
YGR261C	0.518239
YPL090C	0.518229
YCL017C	0.518131
YDR047W	0.518062
YER155C	0.517971
YKR063C	0.517014
YCL059C	0.516854
YDL213C	0.516631
YDR194C	0.51651
YER111C	0.516373
YNL207W	0.515992
YLR448W	0.515668
YIL123W	0.515456
YDR045C	0.514573
YHR188C	0.514391
YHL010C	0.514007
YOR167C	0.513777
YOR090C	0.513564
YGL252C	0.513429
YDR122W	0.513285
YER027C	0.513086
YJL008C	0.51297
YDL013W	0.512832
YJL198W	0.512816
YBR288C	0.512175
YHR197W	0.512129
YPL234C	0.51196
YER073W	0.511668
YPL081W	0.511579
YJL134W	0.511554
YBR084W	0.511173
YBR233W	0.511164
YGR106C	0.511146
YOR349W	0.510541
YKL121W	0.510403
YKL023W	0.510058
YGR093W	0.509958
YNL064C	0.509727
YMR080C	0.509023
YBR035C	0.509018
YBL008W	0.508877
YML060W	0.508819
[truncated: 1,790 more rows]
