# Supplementary material for: Decapping factor Dcp2 controls mRNA abundance and translation to adjust metabolism and filamentation to nutrient availability
Source: eLife journal article supplement (doi:10.7554/elife.85545), 2023-06-02
Supplement: fig3-figsupp4-data2 [file Figure 3 – figure supplement 4 – source data 2.xlsx]

## Sheet: mRNA to Rpb1 occp. 0.8 to 1.2
transcripts showing	gene_id
mRNA abundance/Rpb1_Occ 0.8 – 1.2 (n=969)	YPL226W
	YGR241C
	YIL112W
	YNR054C
	YAL036C
	YBR041W
	YGR234W
	YOR253W
	YOR165W
	YJL098W
	YER136W
	YJL123C
	YNR043W
	YLR328W
	YOR270C
	YCL011C
	YGL044C
	YER025W
	YMR010W
	YNL190W
	YLR304C
	YJL052W
	YOL124C
	YOR151C
	YAL012W
	YEL036C
	YHR138C
	YBL014C
	YOR123C
	YOL052C
	YPL050C
	YGR211W
	YNL137C
	YML124C
	YHR169W
	YNL113W
	YGR087C
	YBR220C
	YLR222C
	YOR106W
	YCR043C
	YCR044C
	YDL007W
	YHR088W
	YER082C
	YLL012W
	YPR008W
	YOR287C
	YGR103W
	YHR066W
	YNL002C
	YJL002C
	YFR039C
	YJR002W
	YNL182C
	YLR293C
	YDR298C
	YJL069C
	YHL011C
	YDR086C
	YLR422W
	YBR058C-A
	YBL091C
	YDR214W
	YER100W
	YBL093C
	YDR158W
	YMR295C
	YLL061W
	YFL036W
	YKR018C
	YKR008W
	YNL139C
	YDR300C
	YHR126C
	YDL004W
	YKL018C-A
	YBL036C
	YMR091C
	YLR197W
	YNR028W
	YPR133C
	YHR132C
	YHR108W
	YKL096W-A
	YFL048C
	YNL241C
	YGL179C
	YLR143W
	YER073W
	YGL078C
	YNR048W
	YPR137W
	YPL212C
	YGL140C
	YHR140W
	YDR422C
	YCL057C-A
	YJL166W
	YMR308C
	YNL098C
	YMR305C
	YDR099W
	YBR078W
	YAL023C
	YNL110C
	YDR487C
	YHL008C
	YPL009C
	YOR273C
	YDR194C
	YNL151C
	YDL192W
	YPR041W
	YKR056W
	YDR414C
	YER003C
	YEL040W
	YML035C
	YDL205C
	YGR145W
	YNL243W
	YMR123W
	YHR094C
	YNL091W
	YLR067C
	YJL033W
	YER027C
	YOL109W
	YJL159W
	YPL016W
	YNL071W
	YDR321W
	YKL157W
	YJR094W-A
	YLR028C
	YER009W
	YNL313C
	YJL137C
	YKR048C
	YOL141W
	YGR245C
	YCR026C
	YPL048W
	YBL069W
	YDR527W
	YOR198C
	YML028W
	YFR044C
	YGL137W
	YJR009C
	YML022W
	YLR406C
	YKL009W
	YDR129C
	YNL035C
	YIR037W
	YGL144C
	YCR017C
	YOR027W
	YPR037C
	YGR186W
	YPL127C
	YGL030W
	YER032W
	YPL026C
	YAL007C
	YOR156C
	YPL194W
	YLR361C-A
	YDR304C
	YKL205W
	YBR229C
	YAL025C
	YOL115W
	YCR094W
	YKR023W
	YPR165W
	YGR285C
	YGL258W
	YNR052C
	YLR017W
	YLL001W
	YBL071C-B
	YKL165C
	YKL068W
	YFR016C
	YOR101W
	YDR077W
	YFL001W
	YIL091C
	YER057C
	YNR053C
	YDL145C
	YER169W
	YCR051W
	YIL125W
	YBR301W
	YAR068W
	YPL153C
	YBR288C
	YJR066W
	YCR053W
	YLL018C
	YGR240C
	YPL237W
	YFL022C
	YLR447C
	YJR129C
	YDR042C
	YER048C
	YLR070C
	YML078W
	YGR217W
	YER087C-B
	YKL210W
	YML080W
	YOR233W
	YIL048W
	YLR083C
	YPL227C
	YMR202W
	YFR006W
	YOR356W
	YLR096W
	YML065W
	YDR356W
	YBR271W
	YNL055C
	YMR099C
	YHR064C
	YDR217C
	YGR159C
	YML010W
	YGR286C
	YPR062W
	YIR002C
	YIL142W
	YMR318C
	YBL011W
	YGL103W
	YLR002C
	YPL221W
	YMR061W
	YMR307W
	YOL139C
	YPL128C
	YIL011W
	YDL060W
	YFL018C
	YOR254C
	YEL001C
	YLL050C
	YKR092C
	YLR106C
	YNR031C
	YLR024C
	YFL062W
	YBR283C
	YBR219C
	YMR309C
	YDR178W
	YEL033W
	YIL121W
	YDR477W
	YBL032W
	YPL085W
	YMR054W
	YHR015W
	YER031C
	YNR038W
	YFR052W
	YLR006C
	YJL109C
	YDR518W
	YFR033C
	YIL033C
	YHR068W
	YJL165C
	YOR234C
	YMR186W
	YDR060W
	YLR027C
	YLR018C
	YCR069W
	YBR079C
	YGL225W
	YBR218C
	YPR186C
	YPL273W
	YOL061W
	YLR330W
	YML079W
	YHR030C
	YMR227C
	YCL058C
	YPR159W
	YDR161W
	YPR095C
	YGL244W
	YPR163C
	YER086W
	YHR042W
	YGL228W
	YPL268W
	YOR256C
	YMR226C
	YJL087C
	YOL078W
	YPL231W
	YGL167C
	YDR497C
	YOR321W
	YJL014W
	YOR187W
	YLR066W
	YPR172W
	YMR173W
	YPL030W
	YCL040W
	YIR035C
	YNL108C
	YOR095C
	YHR023W
	YHR039C-A
	YDR011W
	YJL157C
	YKL077W
	YCL001W
	YGL092W
	YJL171C
	YIL147C
	YDR428C
	YMR243C
	YDR182W
	YBR287W
	YHR172W
	YLR367W
	YLL015W
	YHR092C
	YBL055C
	YCR030C
	YGL209W
	YPR145W
	YIL005W
	YAL042W
	YOR108W
	YOL027C
	YGL203C
	YHR047C
	YJR010C-A
	YLR438C-A
	YJR070C
	YPL263C
	YMR238W
	YER174C
	YNL061W
	YLL031C
	YDR276C
	YMR297W
	YPR189W
	YHR020W
	YKL152C
	YOR204W
	YDL126C
	YML031W
	YJL111W
	YOR276W
	YPR138C
	YDR062W
	YOL025W
	YAR035C-A
	YNR047W
	YLR043C
	YER155C
	YBR025C
	YAL026C
	YBR267W
	YDR093W
	YDR261C
	YNL132W
	YKL014C
	YNL154C
	YKR084C
	YKL106W
	YNL201C
	YLR449W
	YMR205C
	YJL010C
	YIL047C
	YGL022W
	YNL248C
	YML125C
	YOR341W
	YLR095C
	YCL042W
	YDR317W
	YCR052W
	YJL183W
	YJL034W
	YBL034C
	YNL084C
	YBR146W
	YNL321W
	YNL306W
	YBR039W
	YOR122C
	YER006W
	YDR247W
	YIL038C
	YPL146C
	YML066C
	YER056C-A
	YML048W
	YOR304W
	YMR244W
	YBR151W
	YIL064W
	YOR145C
	YLR351C
	YKL109W
	YJR143C
	YML110C
	YGR013W
	YGL202W
	YKL029C
	YML085C
	YDR345C
	YML087C
	YJL180C
	YNL323W
	YJL095W
	YMR321C
	YEL002C
	YML017W
	YPR010C
	YPR116W
	YHR188C
	YDR232W
	YDR416W
	YDR294C
	YFL037W
	YLR044C
	YKL172W
	YLR068W
	YBR034C
	YMR203W
	YDR035W
	YDR188W
	YDL185W
	YLR309C
	YML071C
	YAL021C
	YOR272W
	YNR008W
	YOR335C
	YOR086C
	YDR245W
	YER002W
	YHR079C
	YMR316W
	YLR055C
	YEL042W
	YGL215W
	YMR129W
	YDR346C
	YBL097W
	YEL026W
	YIL114C
	YOR040W
	YGL255W
	YMR145C
	YGL133W
	YKL192C
	YCR087C-A
	YBR159W
	YJR105W
	YKL024C
	YPR190C
	YPL190C
	YMR290C
	YDR226W
	YLR129W
	YDL063C
	YOL092W
	YLR262C-A
	YKL160W
	YGR157W
	YKR095W
	YAL024C
	YHR019C
	YNL237W
	YCL050C
	YGL168W
	YPL038W-A
	YEL027W
	YDR170C
	YOR072W-B
	YLR301W
	YPL033C
	YDR248C
	YMR044W
	YOR167C
	YDR512C
	YCR039C
	YDR159W
	YHR032W
	YMR217W
	YPR074C
	YMR011W
	YNL016W
	YDR447C
	YGR276C
	YLR109W
	YLR303W
	YOR194C
	YHR089C
	YKR031C
	YHR041C
	YLL048C
	YDR155C
	YIL109C
	YOR085W
	YGR090W
	YNL234W
	YPR156C
	YLR190W
	YKL191W
	YOL113W
	YGR254W
	YMR251W-A
	YER148W
	YNL244C
	YMR012W
	YPR118W
	YPL137C
	YJR121W
	YPR181C
	YDR502C
	YFR023W
	YCR034W
	YNL079C
	YNL216W
	YGR060W
	YLR185W
	YHR007C
	YJR047C
	YML015C
	YPL199C
	YBR104W
	YBR205W
	YNR018W
	YDL078C
	YIL030C
	YDR119W
	YNL238W
	YIL037C
	YLR256W
	YMR213W
	YJL042W
	YLR121C
	YER132C
	YOR091W
	YNR016C
	YOL144W
	YER114C
	YCL036W
	YEL051W
	YKL078W
	YCR028C-A
	YGR281W
	YDR033W
	YJL172W
	YGL083W
	YGL050W
	YAL038W
	YER130C
	YDR012W
	YCR048W
	YHR085W
	YCL059C
	YMR088C
	YLR413W
	YNL259C
	YPR091C
	YDL084W
	YGL016W
	YER120W
	YLR175W
	YGL027C
	YGR094W
	YDR481C
	YGL031C
	YDL181W
	YPL043W
	YIR006C
	YCR084C
	YLR020C
	YIL156W
	YAL013W
	YDR038C
	YJL138C
	YDL061C
	YLR059C
	YPL029W
	YDL229W
	YPR075C
	YGR283C
	YOR385W
	YBR155W
	YDR522C
	YNL217W
	YBR182C-A
	YGL029W
	YKR081C
	YKL182W
	YKL004W
	YKL006C-A
	YPR069C
	YMR030W-A
	YLR126C
	YOR197W
	YML106W
	YCL026C-B
	YOR330C
	YPR143W
	YMR128W
	YJL148W
	YGR162W
	YDR002W
	YNL096C
	YER062C
	YJR064W
	YCR009C
	YDR471W
	YGR020C
	YBL020W
	YOL125W
	YOR326W
	YIL008W
	YFL004W
	YCR016W
	YGL122C
	YJL136C
	YDL082W
	YPL160W
	YJL050W
	YMR143W
	YBL042C
	YNR062C
	YOR143C
	YBR031W
	YMR209C
	YBL004W
	YGR240C-A
	YCR057C
	YDL035C
	YGL245W
	YPR183W
	YPR112C
	YKR060W
	YMR049C
	YHR165C
	YGR106C
	YLR336C
	YLR159C-A
	YLR450W
	YKL060C
	YIR004W
	YDL195W
	YDR385W
	YKL006W
	YLL034C
	YMR303C
	YJR075W
	YDR334W
	YMR014W
	YCL054W
	YHR174W
	YGR105W
	YBR067C
	YJL028W
	YDL095W
	YPL037C
	YOR153W
	YBL087C
	YLR388W
	YNR004W
	YBL054W
	YGR192C
	YPR192W
	YPR191W
	YBR015C
	YOR247W
	YER037W
	YKR024C
	YGL014W
	YDL133C-A
	YKL073W
	YFL023W
	YKR099W
	YHL034C
	YCL037C
	YNL271C
	YBR011C
	YDL129W
	YDR420W
	YDR064W
	YER014C-A
	YML075C
	YJR137C
	YLR172C
	YOR098C
	YLR409C
	YNL210W
	YCL017C
	YDR056C
	YAL003W
	YJL080C
	YML115C
	YLR249W
	YGL049C
	YFR032C-A
	YOR310C
	YHR029C
	YEL031W
	YBL007C
	YDL130W
	YGL008C
	YLR025W
	YOL039W
	YDR120C
	YMR229C
	YCR093W
	YBL099W
	YNL069C
	YDR025W
	YKL082C
	YLR061W
	YER008C
	YOL121C
	YOR373W
	YKL128C
	YPR009W
	YLR438W
	YLR378C
	YML093W
	YNL024C
	YBL030C
	YER001W
	YDR500C
	YJL117W
	YDR454C
	YHR021C
	YNL209W
	YNL119W
	YDL140C
	YGR085C
	YOR116C
	YLR208W
	YOR056C
	YJR126C
	YBL098W
	YAL035W
	YML059C
	YKL117W
	YNL292W
	YMR288W
	YIL133C
	YFL031W
	YKL043W
	YGR123C
	YGL196W
	YHR071W
	YJR085C
	YEL034W
	YBR162C
	YIL020C
	YBR044C
	YOR338W
	YGL139W
	YMR116C
	YFR031C-A
	YCL058W-A
	YDR412W
	YLR110C
	YMR194W
	YKL054C
	YER011W
	YGL055W
	YBR127C
	YIL126W
	YLR213C
	YJL189W
	YBR106W
	YLR326W
	YPL082C
	YDL070W
	YIL018W
	YGR214W
	YMR274C
	YGR250C
	YHR216W
	YOR063W
	YEL017C-A
	YGL150C
	YDR432W
	YCR033W
	YLR333C
	YIL039W
	YLL008W
	YER117W
	YHR141C
	YPR108W-A
	YFR032C
	YHL001W
	YDL058W
	YML026C
	YBL039C
	YOR267C
	YPL198W
	YJL177W
	YGR233C
	YLR325C
	YDL075W
	YDR464W
	YDR483W
	YLR048W
	YDR110W
	YDL031W
	YDL136W
	YGR260W
	YNL162W
	YLR342W
	YNL023C
	YCR008W
	YMR183C
	YAR066W
	YKL214C
	YLR087C
	YOR344C
	YGR118W
	YOR182C
	YCR098C
	YOR049C
	YIL123W
	YCL063W
	YNR074C
	YDL153C
	YJL121C
	YGR116W
	YKR057W
	YER178W
	YBL047C
	YIL149C
	YDR107C
	YKR094C
	YLR223C
	YML126C
	YLR342W-A
	YPL106C
	YHR213W-B
	YLR287C-A
	YGR180C
	YOR012W
	YDL019C
	YIL069C
	YFL041W
	YJL020C
	YKR059W
	YDL083C
	YFL039C
	YOL040C
	YIL148W
	YNL215W
	YER023W
	YCR061W
	YJL190C
	YKL056C
	YGL076C
	YJR145C
	YDR150W
	YMR241W
	YNL010W
	YPL143W
	YHR193C
	YPL207W
	YHR034C
	YGR148C
	YNL066W
	YDL191W
	YNL112W
	YHR099W
	YHR203C
	YER131W
	YOR355W
	YNL308C
	YDR382W
	YJR077C
	YLR344W
	YJL026W
	YKL127W
	YHL033C
	YCR047C
	YDL081C
	YLL005C
	YPL249C-A
	YGL099W
	YJR045C
	YBR042C
	YMR102C
	YOL013W-A
	YML088W
	YOR071C
	YMR230W
	YPL217C
	YLR354C
	YCL028W
	YPL079W
	YPR043W
	YLR410W
	YEL054C
	YML073C
	YCL005W-A
	YCR004C
	YDR180W
	YJL129C
	YPR080W
	YCL045C
	YHR010W
	YDR326C
	YER074W
	YBR191W
	YCL043C
	YOR293W
	YBR189W
	YIL052C
	YGL206C
	YGL189C
	YOL064C
	YML024W
	YHR214W
	YOL016C
	YOR312C
	YIL043C
	YPL220W
	YBR048W
	YBL067C
	YPR132W
	YPL262W
	YGR027C
	YKR090W
	YNL097C-B
	YLR441C
	YDR144C
	YOL127W
	YML051W
	YMR215W
	YBL027W
	YLL021W
	YPL090C
	YPL131W
	YNL278W
	YDR450W
	YMR242C
	YCR072C
	YDR418W
	YBR118W
	YML072C
