# Supplementary material for: Decapping factor Dcp2 controls mRNA abundance and translation to adjust metabolism and filamentation to nutrient availability
Source: eLife journal article supplement (doi:10.7554/elife.85545), 2023-06-02
Supplement: fig4-data1 [file Figure 4 – source data 1.xlsx]

## Sheet: TE changes dcp2 vs WT
gene_ID	log2FC TE	padj	gene_name		TE_up	gene_ID	log2FC TE dcp2 vs WT		TE_up	gene_ID	log2FC TE dcp2 vs WT
YAL067C	-1.00736	0.0112228	SEO1		FDR < 0.1	YOR102W	10.251		FDR < 0.1	YHR057C	-0.480199
YAL063C-A	-3.5448	0.0824027			FC > 1.4	YDL009C	7.9318		FC > 1.4	YDR319C	-0.480299
YAL063C	0.0598379	0.899856	FLO9		n=541	YOR121C	7.27448		n=659	YNL126W	-0.480973
YAL054C	1.27341	0.0023749	ACS1			YOR218C	6.27831			YDR135C	-0.483386
YAL049C	0.254102	0.122194	AIM2			YAL004W	5.34727			YNL106C	-0.483811
YAL047C	-0.69614	0.00264959	SPC72			YOL150C	4.59988			YMR167W	-0.484343
YAL046C	0.367306	0.0796864	AIM1			YPR121W	4.23864			YBR110W	-0.485121
YAL044C	0.395714	0.0140475	GCV3			YOR041C	3.87236			YOR371C	-0.485381
YAL043C	-0.0728384	0.659061	PTA1			YOR084W	3.6132			YGR210C	-0.48548
YAL040C	-1.46547	4.54269e-22	CLN3			YDL222C	3.5044			YDR141C	-0.486773
YAL039C	0.336551	0.0274256	CYC3			YIL163C	3.45948			YIR032C	-0.487188
YAL036C	0.118398	0.479059	RBG1			YDL039C	3.40823			YLL002W	-0.487628
YAL034C	1.44226	9.22444e-07	FUN19			YDR008C	3.092			YCR044C	-0.488125
YAL032C	-0.135229	0.613352	PRP45			YBL075C	3.03391			YGL114W	-0.488564
YAL031C	-0.747367	0.00118137	GIP4			YAR019W-A	2.90962			YER173W	-0.489168
YAL029C	-0.752978	8.35123e-07	MYO4			YHR033W	2.90855			YOR188W	-0.490277
YAL026C-A	-0.410497	0.435145				YLR174W	2.88347			YNL257C	-0.490675
YAL026C	-0.0405951	0.825811	DRS2			YBR076C-A	2.82074			YDR399W	-0.491185
YAL025C	0.258492	0.119366	MAK16			YNL146C-A	2.80161			YNL236W	-0.491939
YAL024C	-0.213798	0.364233	LTE1			YER175W-A	2.79722			YDR108W	-0.491952
YAL023C	-0.423384	9.62763e-05	PMT2			YOR031W	2.77528			YBR278W	-0.492657
YAL022C	-0.471989	0.00122802	FUN26			YGL204C	2.70478			YDR492W	-0.493952
YAL021C	0.261741	0.0590808	CCR4			YJR004C	2.70076			YMR199W	-0.494356
YAL020C	-0.786562	0.000351559	ATS1			YDR241W	2.66313			YBL079W	-0.495825
YAL015C	-0.00769009	0.982374	NTG1			YML007C-A	2.59317			YJL207C	-0.497322
YAL014C	0.204563	0.355211	SYN8			YPL114W	2.52134			YHR081W	-0.49771
YAL010C	-0.261291	0.308584	MDM10			YPR108W-A	2.44069			YMR070W	-0.498051
YAL007C	0.10244	0.516085	ERP2			YDL184C	2.42211			YIL135C	-0.498562
YAL005C	0.28844	0.010001	SSA1			YPR145C-A	2.38121			YBR276C	-0.498649
YAL001C	-0.364624	0.0459239	TFC3			YJL216C	2.34868			YDR349C	-0.500416
YAR002C-A	0.0823251	0.634478	ERP1			YEL017C-A	2.29287			YGL251C	-0.50188
YAR007C	0.173123	0.206332	RFA1			YOR186W	2.23362			YPL011C	-0.502336
YAR014C	-0.0611333	0.748029	BUD14			YNL331C	2.19988			YGR274C	-0.502392
YAR018C	-0.137844	0.560124	KIN3			YDL133C-A	2.0972			YOL053W	-0.50311
YAR019C	-0.631003	0.00775432	CDC15			YOR120W	2.08288			YOL034W	-0.503114
YAR023C	-1.74133	0.00381235				YMR181C	2.07627			YNL254C	-0.503355
YAL064W-B	-2.17819	0.0374992				YLR271W	2.04924			YJL059W	-0.503539
YAL062W	0.346934	0.272003	GDH3			YPR193C	2.00348			YGL142C	-0.503683
YAL061W	1.0226	0.000736941	BDH2			YJL127C-B	2.00206			YLR288C	-0.504872
YAL060W	0.0966214	0.585967	BDH1			YGR127W	1.99301			YPR095C	-0.505587
YAL059W	0.366946	0.0557423	ECM1			YLR264W	1.993			YEL062W	-0.506234
YAL058W	-0.724263	0.000160797	CNE1			YER150W	1.98733			YER061C	-0.506601
YAL056W	-0.371053	0.0386161	GPB2			YDR034W-B	1.96745			YOL088C	-0.506817
YAL055W	-0.322025	0.382538	PEX22			YPL166W	1.90893			YMR029C	-0.506873
YAL053W	-0.562128	9.24339e-07	FLC2			YLL018C-A	1.89224			YNL076W	-0.506921
YAL051W	-0.601185	0.000401513	OAF1			YLR124W	1.85822			YJL130C	-0.507546
YAL044W-A	0.111085	0.632823				YCR107W	1.84601			YER140W	-0.508095
YAL042W	-0.111792	0.421291	ERV46			YCL021W-A	1.84059			YBR158W	-0.50822
YAL041W	-0.454129	0.00498798	CDC24			YGR169C-A	1.74455			YGR077C	-0.508487
YAL038W	0.0585613	0.727334	CDC19			YDL204W	1.73115			YKR021W	-0.509407
YAL037W	-0.57265	0.52251				YOL159C-A	1.71			YFR042W	-0.510784
YAL035W	0.388627	0.000280648	FUN12			YDR524C-B	1.67119			YGR065C	-0.510979
YAL034W-A	0.182693	0.566713	MTW1			YKL138C-A	1.66161			YDR307W	-0.513179
YAL033W	-0.207034	0.352929	POP5			YDR119W-A	1.63203			YOL095C	-0.513204
YAL030W	0.919821	1.716e-05	SNC1			YPR151C	1.62006			YCR023C	-0.513269
YAL028W	-0.604012	0.164434	FRT2			YDR216W	1.6102			YCR048W	-0.513522
YAL027W	0.094925	0.81919	SAW1			YNL162W-A	1.59283			YPR081C	-0.513952
YAL019W	-0.203139	0.178523	FUN30			YBR056W-A	1.58164			YER113C	-0.514248
YAL017W	-0.161635	0.381752	PSK1			YCR020W-B	1.57769			YML125C	-0.514269
YAL016W	0.399144	0.00029684	TPD3			YCR014C	1.5615			YPL204W	-0.514629
YAL013W	0.0021996	0.993951	DEP1			YPL186C	1.54881			YGR004W	-0.514869
YAL012W	0.204699	0.12113	CYS3			YGR183C	1.54379			YML114C	-0.515617
YAL011W	0.159623	0.590283	SWC3			YOL052C-A	1.52596			YMR111C	-0.515936
YAL009W	-0.565461	0.0483868	SPO7			YHL042W	1.49075			YJR011C	-0.517088
YAL008W	0.370806	0.11696	FUN14			YBR085C-A	1.49068			YMR284W	-0.517551
YAL004W	5.34727	0.0366282				YHR001W-A	1.4635			YMR179W	-0.517814
YAL003W	0.245488	0.0430698	EFB1			YDL085C-A	1.46096			YOR081C	-0.51805
YAL002W	-1.00034	3.16289e-07	VPS8			YKL187C	1.45602			YPR198W	-0.518591
YAR002W	0.241934	0.171551	NUP60			YDR070C	1.45344			YMR281W	-0.519322
YAR003W	0.405623	0.0640468	SWD1			YGR088W	1.44455			YHL038C	-0.519402
YAR008W	-0.23661	0.37523	SEN34			YAL034C	1.44226			YKR087C	-0.519504
YAR015W	0.114001	0.522475	ADE1			YDR086C	1.44106			YOR222W	-0.519865
YAR019W-A	2.90962	0.00733359				YNL143C	1.43009			YGL159W	-0.521654
YAR027W	-0.186857	0.346603	UIP3			YLR297W	1.4257			YML099C	-0.522031
YAR028W	0.114724	0.671083				YNR004W	1.42446			YDL125C	-0.522327
YAR029W	-0.47899	0.815344				YJR108W	1.42372			YHR149C	-0.52277
YAR031W	0.131305	0.720138	PRM9			YHR087W	1.39924			YER110C	-0.522887
YAR033W	-0.4136	0.205338	MST28			YPL223C	1.37928			YLR020C	-0.5231
YAR035W	-0.140164	0.809691	YAT1			YOR210W	1.37773			YDR191W	-0.523111
YAR042W	-0.321232	0.050357	SWH1			YKL026C	1.33558			YKL130C	-0.523718
YAR050W	-0.350364	0.454051	FLO1			YJL144W	1.33283			YPL069C	-0.524643
YAR071W	-0.655721	5.88006e-09	PHO11			YKL084W	1.32338			YPL150W	-0.525005
YBL113C	-0.910574	1.10041e-10				YLR395C	1.31984			YCL064C	-0.526047
YBL107C	0.318801	0.178882				YLL057C	1.31274			YMR187C	-0.527628
YBL106C	-1.38288	1.65201e-07	SRO77			YDR276C	1.30492			YJR058C	-0.528043
YBL105C	-0.079683	0.709565	PKC1			YDL067C	1.30067			YDR013W	-0.528211
YBL104C	-0.150867	0.496262				YBL078C	1.29436			YKL155C	-0.530222
YBL103C	0.358192	0.0895255	RTG3			YIL059C	1.29362			YGL003C	-0.53052
YBL101C	0.0102867	0.969726	ECM21			YDL130W-A	1.28045			YDR235W	-0.530645
YBL093C	0.509046	0.00612826	ROX3			YKR045C	1.27999			YDR291W	-0.531266
YBL091C-A	0.373695	0.235813	SCS22			YAL054C	1.27341			YDR381W	-0.531532
YBL091C	0.214826	0.120018	MAP2			YKL096W-A	1.27149			YGR093W	-0.531977
YBL088C	-0.998297	7.63655e-08	TEL1			YIR016W	1.26283			YOR292C	-0.532194
YBL087C	0.635977	7.28366e-09	RPL23A			YJL214W	1.25326			YBR244W	-0.532345
YBL086C	0.225847	0.391522				YNL024C-A	1.25069			YHR198C	-0.534185
YBL084C	-0.684691	0.00190295	CDC27			YER046W	1.24952			YJR033C	-0.535564
YBL080C	-0.115263	0.728236	PET112			YNL245C	1.23665			YGL113W	-0.535872
YBL078C	1.29436	2.70976e-09	ATG8			YDL061C	1.23033			YJL187C	-0.536692
YBL076C	-0.0872017	0.508247	ILS1			YHR143W-A	1.22025			YLR404W	-0.536867
YBL075C	3.03391	2.58761e-24	SSA3			YGR008C	1.21437			YKL024C	-0.536983
YBL074C	-0.444752	0.112322	AAR2			YGR161W-C	1.21199			YJL209W	-0.537419
YBL072C	0.28801	0.0123263	RPS8A			YML095C	1.20687			YJR132W	-0.537802
YBL070C	-0.131433	0.972827				YPR184W	1.20111			YGR171C	-0.538868
YBL067C	0.0820195	0.713039	UBP13			YDL079C	1.2009			YDR387C	-0.539683
YBL066C	-0.286068	0.170065	SEF1			YKL006C-A	1.18403			YML019W	-0.539956
YBL064C	-0.202253	0.238813	PRX1			YER053C-A	1.18089			YHL036W	-0.540301
YBL061C	0.0677126	0.702906	SKT5			YGR201C	1.16831			YOR299W	-0.543353
YBL059C-A	0.43996	0.0331811	CMC2			YBL028C	1.16735			YDL052C	-0.544223
YBL057C	0.038471	0.878073	PTH2			YLR178C	1.16634			YJR117W	-0.544424
YBL055C	-0.0395681	0.875158				YNL070W	1.15124			YLR320W	-0.545045
YBL052C	-0.681749	0.00935123	SAS3			YOR173W	1.14819			YPL221W	-0.545415
YBL051C	-0.00893134	0.965869	PIN4			YBR058C-A	1.13881			YNL309W	-0.545769
YBL047C	0.197222	0.102597	EDE1			YDR210W	1.12725			YOL072W	-0.546019
YBL045C	0.194019	0.113637	COR1			YDL181W	1.12172			YMR202W	-0.546038
YBL042C	-0.391953	0.00106716	FUI1			YPL230W	1.11427			YKL079W	-0.547626
YBL040C	-0.297903	0.0707493	ERD2			YMR251W-A	1.1138			YDR483W	-0.549868
YBL039C	0.198315	0.106695	URA7			YER104W	1.10828			YOR172W	-0.550521
YBL036C	0.0609618	0.750393				YJL106W	1.10783			YNL048W	-0.550576
YBL035C	0.0264467	0.901879	POL12			YER180C-A	1.10543			YGL036W	-0.550782
YBL034C	-0.138344	0.502539	STU1			YHR116W	1.10494			YGL243W	-0.552498
YBL033C	-0.0626333	0.784673	RIB1			YBL039W-B	1.10319			YKL090W	-0.553098
YBL030C	0.279396	0.0401874	PET9			YDR275W	1.09273			YIL056W	-0.553189
YBL029C-A	0.113158	0.740469				YLR363W-A	1.08794			YGR166W	-0.553524
YBL028C	1.16735	3.38775e-09				YJL124C	1.08652			YBR259W	-0.553768
YBL023C	0.122238	0.542059	MCM2			YOR304C-A	1.08382			YOL100W	-0.55464
YBL022C	0.31578	0.00729925	PIM1			YEL073C	1.07831			YML006C	-0.555739
YBL021C	0.755698	0.00388485	HAP3			YDL243C	1.07164			YNL029C	-0.556187
YBL018C	-0.173151	0.54538	POP8			YJL062W-A	1.07099			YIL031W	-0.55678
YBL017C	-0.713316	2.1277e-08	PEP1			YGL029W	1.065			YIL119C	-0.557018
YBL014C	-0.325478	0.172449	RRN6			YOR189W	1.0591			YCL008C	-0.558535
YBL010C	0.000247768	0.999917				YFR017C	1.05617			YER005W	-0.559291
YBL007C	0.420525	0.000718353	SLA1			YER048W-A	1.04739			YDR439W	-0.560203
YBL006C	0.351054	0.0838953	LDB7			YIL138C	1.03278			YGR015C	-0.560344
YBL003C	0.549108	2.64505e-06	HTA2			YJR153W	1.03247			YLR073C	-0.560358
YBL001C	0.513807	0.00391171	ECM15			YDL014W	1.03082			YAL053W	-0.562128
YBR001C	-0.129877	0.501333	NTH2			YMR122W-A	1.02754			YGL176C	-0.563113
YBR002C	-0.1964	0.37485	RER2			YIL146C	1.02719			YGL059W	-0.56333
YBR004C	-1.78846	8.79391e-19	GPI18			YER161C	1.02592			YOR319W	-0.564244
YBR007C	-0.402692	0.0580501	DSF2			YAL061W	1.0226			YAL009W	-0.565461
YBR008C	0.924478	0.233948	FLR1			YNL118C	1.02			YMR274C	-0.565951
YBR009C	0.597101	1.32503e-07	HHF1			YLR361C-A	1.00938			YDR164C	-0.566469
YBR011C	0.640394	1.09559e-07	IPP1			YLR262C-A	1.00811			YHR202W	-0.566512
YBR014C	-0.238483	0.257522	GRX7			YDR252W	1.0043			YDR198C	-0.566661
YBR015C	-0.467237	5.66767e-05	MNN2			YLR038C	0.999642			YFR028C	-0.568052
YBR017C	-0.182703	0.175983	KAP104			YBR282W	0.998419			YOR035C	-0.568179
YBR018C	-0.229464	0.892259	GAL7			YLL009C	0.985913			YOL105C	-0.568741
YBR019C	-1.76407	0.148038	GAL10			YER137C	0.985052			YKL110C	-0.569392
YBR023C	-0.162264	0.237314	CHS3			YJL143W	0.984943			YNL136W	-0.570045
YBR025C	0.227777	0.0353288	OLA1			YBL071W-A	0.984455			YCR075C	-0.572108
YBR026C	0.0636444	0.738275	ETR1			YMR286W	0.974399			YBR042C	-0.575745
YBR028C	-0.267469	0.146981				YNL300W	0.972611			YPR169W	-0.576197
YBR029C	-0.435872	0.00265068	CDS1			YNL052W	0.966446			YOR227W	-0.576605
YBR034C	-0.0339939	0.852483	HMT1			YDL241W	0.964039			YKL215C	-0.57681
YBR035C	0.327726	0.0583761	PDX3			YLR008C	0.961108			YPL003W	-0.578443
YBR036C	-0.34595	0.0033036	CSG2			YBR197C	0.960485			YPL095C	-0.578723
YBR037C	0.101535	0.644494	SCO1			YKL093W	0.954999			YNL275W	-0.581197
YBR042C	-0.575745	0.00325639	CST26			YPL189C-A	0.952206			YJL129C	-0.581794
YBR043C	0.286145	0.179821	QDR3			YLR437C	0.950898			YGR238C	-0.583401
YBR044C	-0.457717	0.0220987	TCM62			YDL123W	0.950697			YMR211W	-0.583858
YBR045C	-0.820088	0.024786	GIP1			YLR455W	0.942548			YNL008C	-0.585513
YBR046C	0.32216	0.110302	ZTA1			YLR192C	0.938599			YGL022W	-0.586671
YBR049C	0.351074	0.00962979	REB1			YOR028C	0.936113			YCL039W	-0.58731
YBR050C	-0.677345	0.316505	REG2			YLR363C	0.933137			YMR013C	-0.588834
YBR052C	0.266498	0.0719265	RFS1			YDR441C	0.928306			YOR080W	-0.589249
YBR053C	0.0840529	0.693596				YNR036C	0.92233			YNR013C	-0.589408
YBR055C	-0.427676	0.012457	PRP6			YNL009W	0.921841			YDR435C	-0.589561
YBR057C	0.116499	0.611934	MUM2			YAL030W	0.919821			YJL023C	-0.590983
YBR058C	-0.0748515	0.659721	UBP14			YLL060C	0.918932			YJL147C	-0.591304
YBR058C-A	1.13881	4.52541e-08	TSC3			YBR146W	0.917523			YML018C	-0.592212
YBR059C	-0.179475	0.290059	AKL1			YOR202W	0.917351			YPR135W	-0.593503
YBR060C	-0.261951	0.171635	ORC2			YEL048C	0.915064			YJL197W	-0.593624
YBR061C	-0.199324	0.212988	TRM7			YGL098W	0.911818			YEL004W	-0.594207
YBR062C	0.0851015	0.772797				YJL166W	0.911264			YER093C	-0.596259
YBR063C	-1.37379	0.104829				YER030W	0.907593			YBR223C	-0.596402
YBR065C	0.0288812	0.924005	ECM2			YLR275W	0.900932			YOL003C	-0.596814
YBR066C	-0.0150022	0.972231	NRG2			YDR263C	0.899901			YLR092W	-0.597161
YBR067C	0.159379	0.732974	TIP1			YDL160C-A	0.898644			YNL063W	-0.597198
YBR068C	0.144663	0.235813	BAP2			YMR105C	0.89067			YDR150W	-0.597455
YBR069C	-0.0454218	0.823562	TAT1			YNL131W	0.888418			YLR072W	-0.598145
YBR070C	-0.440162	0.0617667	ALG14			YDR260C	0.884984			YNR039C	-0.598315
YBR076C-A	2.82074	9.84003e-07				YNL031C	0.880399			YLR131C	-0.60027
YBR077C	0.396386	0.0818103	SLM4			YDR322C-A	0.880225			YPL007C	-0.600923
YBR079C	-0.100701	0.389127	RPG1			YNL153C	0.878964			YGR199W	-0.600987
YBR080C	0.215562	0.11442	SEC18			YFR033C	0.878052			YAL051W	-0.601185
YBR081C	0.094854	0.661635	SPT7			YPR116W	0.874328			YGL104C	-0.601598
YBR082C	0.400872	0.0244003	UBC4			YJR048W	0.874284			YFR046C	-0.6019
YBR084C-A	0.195281	0.147914	RPL19A			YOR294W	0.870629			YJL204C	-0.603542
YBR085C-A	1.49068	2.99302e-31				YBR162W-A	0.868454			YIL047C	-0.604218
YBR086C	-0.079313	0.57172	IST2			YJL116C	0.866986			YMR075W	-0.605374
YBR088C	-0.121415	0.425016	POL30			YGR280C	0.861117			YER033C	-0.606074
YBR089C-A	0.422593	0.00300151	NHP6B			YMR174C	0.860784			YOR128C	-0.607183
YBR091C	0.42181	0.0352889	TIM12			YLR025W	0.856707			YOL069W	-0.607186
YBR092C	-0.361987	0.000353863	PHO3			YMR256C	0.852784			YGR270W	-0.607633
YBR093C	-0.236443	0.121918	PHO5			YPL135W	0.851645			YLL058W	-0.608243
YBR095C	-0.00490225	0.986493	RXT2			YJL189W	0.851162			YGR260W	-0.608253
YBR099C	-3.8324	0.0434594				YKL170W	0.85088			YOR149C	-0.608498
YBR101C	0.34931	0.00491599	FES1			YKL117W	0.850389			YPL175W	-0.608502
YBR102C	-0.345102	0.0400891	EXO84			YDR308C	0.845649			YJR046W	-0.610623
YBR105C	0.169808	0.55587	VID24			YGR181W	0.844383			YDR207C	-0.611002
YBR107C	-0.316344	0.465257	IML3			YDR079W	0.842106			YGL128C	-0.611019
YBR109C	0.704705	1.18089e-09	CMD1			YOR257W	0.841822			YPL064C	-0.611562
YBR111C	0.362364	0.0241376	YSA1			YMR194C-B	0.840608			YPL214C	-0.611672
YBR112C	-0.0508386	0.767072	CYC8			YNL079C	0.837986			YMR162C	-0.612102
YBR115C	0.226831	0.078904	LYS2			YER035W	0.833128			YMR294W	-0.615986
YBR120C	0.150785	0.619349	CBP6			YNL244C	0.829163			YGR041W	-0.616146
YBR121C	-0.0845166	0.485195	GRS1			YER058W	0.826205			YLR246W	-0.616155
YBR122C	0.604214	0.000299382	MRPL36			YPR036W-A	0.824724			YMR259C	-0.616763
YBR123C	0.147774	0.503195	TFC1			YLR211C	0.82021			YJR116W	-0.617423
YBR125C	-0.293776	0.122534	PTC4			YJR085C	0.819349			YDR126W	-0.617713
YBR126C	0.418955	0.00138248	TPS1			YMR271C	0.818343			YJR122W	-0.617797
YBR127C	0.210143	0.101659	VMA2			YLR019W	0.816154			YKR078W	-0.617936
YBR128C	0.487593	0.491872	ATG14			YOR052C	0.814474			YJL206C	-0.617987
YBR129C	0.458638	0.0185519	OPY1			YPL257W	0.812942			YKL176C	-0.619885
YBR130C	0.309119	0.0622609	SHE3			YBR233W-A	0.81271			YDR541C	-0.619894
YBR132C	0.353166	0.0923207	AGP2			YGR268C	0.811747			YPR105C	-0.62025
YBR133C	-0.676147	2.45009e-06	HSL7			YER139C	0.806867			YNR066C	-0.621712
YBR138C	0.215839	0.381797				YMR303C	0.805246			YER075C	-0.623702
YBR140C	0.0937796	0.585523	IRA1			YER186C	0.804667			YLR373C	-0.623788
YBR141C	0.183432	0.528313				YPR133W-A	0.801525			YDR444W	-0.624828
YBR143C	0.15635	0.20598	SUP45			YMR318C	0.800978			YCL002C	-0.625323
YBR150C	0.290413	0.784673	TBS1			YKL053C-A	0.800118			YNR065C	-0.626895
YBR154C	0.0885946	0.61292	RPB5			YMR260C	0.799935			YHR045W	-0.626966
YBR156C	-0.643594	0.00395923	SLI15			YGL242C	0.798756			YGR117C	-0.62823
YBR157C	-0.591343	0.101313	ICS2			YOL077W-A	0.796546			YOL043C	-0.629013
YBR162C	-0.0501117	0.764941	TOS1			YJR060W	0.796206			YLR137W	-0.6297
YBR164C	0.18021	0.232378	ARL1			YNL015W	0.793987			YAR019C	-0.631003
YBR166C	-0.0606416	0.738129	TYR1			YML108W	0.793954			YHR215W	-0.631203
YBR167C	0.391895	0.219565	POP7			YDR328C	0.792067			YGL071W	-0.631505
YBR169C	0.16313	0.333264	SSE2			YDR031W	0.790387			YMR185W	-0.63181
YBR170C	-0.148784	0.386638	NPL4			YMR161W	0.790163			YHR046C	-0.632808
YBR172C	-0.456776	0.00388485	SMY2			YLR421C	0.785271			YOR238W	-0.633423
YBR173C	0.648842	2.42092e-07	UMP1			YLR221C	0.784575			YJL139C	-0.633792
YBR177C	0.0110554	0.961345	EHT1			YML030W	0.774191			YJR149W	-0.635042
YBR179C	-0.00704598	0.980191	FZO1			YFL010C	0.773742			YGL073W	-0.635769
YBR181C	0.243075	0.0378907	RPS6B			YCR027C	0.773389			YLR035C	-0.6359
YBR182C	-0.376713	0.313502	SMP1			YPR201W	0.772624			YKL168C	-0.636867
YBR185C	0.0531694	0.835529	MBA1			YDR453C	0.770442			YHR079C	-0.637592
YBR188C	0.488003	0.0459079	NTC20			YFL014W	0.76926			YIL147C	-0.637949
YBR193C	0.415368	0.0439453	MED8			YLL038C	0.767671			YJL100W	-0.63837
YBR195C	-0.460458	0.045493	MSI1			YPL046C	0.766603			YJR106W	-0.638554
YBR196C	0.0719937	0.601261	PGI1			YFR049W	0.76435			YPR138C	-0.638827
YBR197C	0.960485	4.08709e-06				YKL156W	0.762283			YOL148C	-0.639593
YBR198C	-0.189414	0.215032	TAF5			YER103W	0.761436			YLR417W	-0.640453
YBR201C-A	0.885281	0.251368				YER087C-B	0.758549			YBR229C	-0.642141
YBR204C	0.418305	0.0320548				YGR020C	0.757536			YNL286W	-0.642587
YBR208C	-0.409865	0.382538	DUR1,2			YNL086W	0.756624			YBR156C	-0.643594
YBR211C	0.0621745	0.877531	AME1			YBL021C	0.755698			YDR383C	-0.643653
YBR216C	0.335719	0.137653	YBP1			YNL260C	0.75341			YIL071C	-0.643728
YBR218C	-0.088564	0.529465	PYC2			YDR482C	0.748857			YMR019W	-0.648696
YBR221C	0.54377	9.99548e-08	PDB1			YNL133C	0.748185			YBL005W	-0.649165
YBR222C	0.0623676	0.710467	PCS60			YGL108C	0.747952			YDR004W	-0.651118
YBR223C	-0.596402	0.029253	TDP1			YKL137W	0.746122			YHR188C	-0.651385
YBR229C	-0.642141	4.98696e-06	ROT2			YOL133W	0.743066			YDL073W	-0.651629
YBR230C	0.1177	0.528377	OM14			YLR325C	0.741486			YJL051W	-0.653739
YBR231C	0.276436	0.270984	SWC5			YNL111C	0.739507			YMR100W	-0.65401
YBR234C	0.529878	1.12498e-05	ARC40			YOL113W	0.736014			YJL002C	-0.654599
YBR236C	0.0886198	0.670422	ABD1			YIR009W	0.734784			YNL042W	-0.655214
YBR238C	-0.01367	0.956721				YMR090W	0.733089			YAR071W	-0.655721
YBR239C	0.0128896	0.972231	ERT1			YPL098C	0.732246			YDR499W	-0.658463
YBR240C	0.168498	0.83391	THI2			YOR142W	0.730176			YPL022W	-0.659215
YBR241C	-0.380946	0.107919				YCR020C-A	0.729148			YPR091C	-0.664207
YBR243C	-0.396658	0.0169074	ALG7			YEL027W	0.728052			YPL008W	-0.665126
YBR245C	0.240257	0.062467	ISW1			YCL035C	0.727447			YJL091C	-0.665345
YBR247C	0.155367	0.317966	ENP1			YJL133C-A	0.722909			YEL005C	-0.667047
YBR248C	-0.0537147	0.761304	HIS7			YDR298C	0.720568			YML020W	-0.670534
YBR249C	0.160701	0.262405	ARO4			YML100W	0.720345			YDL237W	-0.67155
YBR254C	0.537363	0.00767635	TRS20			YOL109W	0.720242			YCL005W	-0.672464
YBR255C-A	0.373311	0.232399				YJR017C	0.718683			YCR066W	-0.675284
YBR256C	-0.0548532	0.791183	RIB5			YDR178W	0.71786			YBR133C	-0.676147
YBR258C	0.0369956	0.931943	SHG1			YNL135C	0.716596			YDL033C	-0.677066
YBR260C	-0.305272	0.0762363	RGD1			YNR063W	0.71551			YDR466W	-0.677597
YBR261C	0.378358	0.0111818	TAE1			YER170W	0.715241			YPL222W	-0.67776
YBR262C	0.516187	0.0130468	AIM5			YDR506C	0.714002			YOR231W	-0.678963
YBR264C	-0.345582	0.150461	YPT10			YDR345C	0.707213			YJL013C	-0.679121
YBR269C	0.584389	0.00275294	FMP21			YJL003W	0.704719			YBL052C	-0.681749
YBR270C	-1.21129	0.00109549	BIT2			YBR109C	0.704705			YPL072W	-0.682117
YBR272C	-0.296308	0.0858656	HSM3			YGR032W	0.703636			YBL084C	-0.684691
YBR273C	0.380045	0.0279126	UBX7			YMR269W	0.703035			YOR071C	-0.68536
YBR275C	0.0569718	0.789907	RIF1			YFL031W	0.702743			YHR155W	-0.686701
YBR276C	-0.498649	0.0133305	PPS1			YFL030W	0.701427			YOL062C	-0.687082
YBR280C	0.149083	0.649308	SAF1			YGL070C	0.701139			YNL291C	-0.687161
YBR281C	-0.00403799	0.985856	DUG2			YPL014W	0.700369			YFR040W	-0.691943
YBR283C	-0.249212	0.0351718	SSH1			YIL156W-B	0.697256			YDL211C	-0.693975
YBR288C	-0.0441429	0.828564	APM3			YOR159C	0.696232			YJR124C	-0.695089
YBR291C	-0.74631	2.7852e-06	CTP1			YLL033W	0.694246			YGL179C	-0.695137
YBR292C	-3.43489	0.0711042				YER071C	0.692406			YAL047C	-0.69614
YBR296C	-0.290258	0.573344	PHO89			YGL080W	0.691216			YDR318W	-0.69828
YBR298C	-2.08014	0.000887122	MAL31			YJL218W	0.69061			YOR022C	-0.698547
YBL102W	0.453508	0.00258277	SFT2			YDR468C	0.688104			YEL063C	-0.698835
YBL099W	0.528196	7.94331e-07	ATP1			YDR378C	0.685746			YJR006W	-0.699831
YBL098W	-0.397566	0.0493434	BNA4			YKL061W	0.684259			YPR164W	-0.701117
YBL097W	0.30736	0.172449	BRN1			YPR093C	0.683078			YLR247C	-0.701181
YBL095W	0.0751439	0.816833				YGR105W	0.681725			YDR026C	-0.702064
YBL092W	0.0252036	0.906259	RPL32			YLR023C	0.678076			YOL157C	-0.702118
YBL090W	0.438944	0.0156203	MRP21			YMR002W	0.67712			YMR052W	-0.703533
YBL089W	-0.711246	0.000924691	AVT5			YJR010C-A	0.675644			YLL012W	-0.703633
YBL085W	-0.414972	0.0105283	BOI1			YML058W	0.673592			YER088C	-0.706828
YBL081W	0.0866783	0.742887				YGR036C	0.673542			YGR202C	-0.707089
YBL079W	-0.495825	0.000290402	NUP170			YJR069C	0.673535			YMR023C	-0.708264
YBL071W-A	0.984455	1.26341e-07	KTI11			YLR110C	0.673526			YGR292W	-0.709668
YBL068W	0.39467	0.00699371	PRS4			YHR162W	0.671654			YGR170W	-0.710563
YBL063W	-0.7305	0.00200491	KIP1			YDR510W	0.671598			YBL089W	-0.711246
YBL060W	-1.3723	6.0453e-12	YEL1			YLR177W	0.671187			YKL101W	-0.711331
YBL059W	0.3309	0.291955				YJL104W	0.670125			YNR067C	-0.712837
YBL058W	0.24951	0.0540201	SHP1			YHR039C-A	0.669735			YBL017C	-0.713316
YBL056W	0.383819	0.00221699	PTC3			YDR059C	0.66939			YJR098C	-0.71468
YBL054W	0.22906	0.22815	TOD6			YNL064C	0.667584			YML067C	-0.714901
YBL050W	0.150428	0.306036	SEC17			YDL043C	0.667254			YFR030W	-0.716506
YBL048W	-5.21549	0.019903	RRT1			YDR460W	0.66705			YPL167C	-0.719194
YBL046W	-0.14468	0.539879	PSY4			YPR165W	0.666249			YML082W	-0.719762
YBL043W	-0.946242	0.138169	ECM13			YNR024W	0.666158			YJL062W	-0.719805
YBL041W	0.252342	0.0518726	PRE7			YJR097W	0.665328			YLR375W	-0.721419
YBL039W-B	1.10319	0.0376244				YOR308C	0.664195			YDL138W	-0.721899
YBL038W	0.341222	0.0420812	MRPL16			YPR005C	0.664014			YAL058W	-0.724263
YBL037W	-0.359004	0.0158326	APL3			YHR138C	0.66276			YMR064W	-0.725963
YBL032W	0.0598928	0.742948	HEK2			YGR230W	0.662551			YJR131W	-0.72599
YBL031W	0.223363	0.586999	SHE1			YFR008W	0.658836			YHR091C	-0.726509
YBL029W	-0.357683	0.441254				YLR043C	0.658154			YIR030C	-0.727815
YBL027W	0.151632	0.318456	RPL19B			YPL250C	0.656194			YGL257C	-0.730418
YBL026W	-0.128693	0.560117	LSM2			YDL120W	0.654201			YBL063W	-0.7305
YBL025W	0.599775	0.0863256	RRN10			YDR377W	0.653493			YLR460C	-0.730518
YBL024W	-0.0101434	0.952232	NCL1			YDR363W-A	0.653419			YFL055W	-0.732801
YBL020W	-0.749936	7.73011e-06	RFT1			YIL162W	0.653366			YJR003C	-0.734857
YBL019W	-1.18273	1.15483e-05	APN2			YKL192C	0.652488			YML050W	-0.737125
YBL016W	0.0739584	0.696251	FUS3			YPR170W-B	0.6524			YER060W-A	-0.737878
YBL015W	-0.036685	0.873552	ACH1			YDR488C	0.652221			YHL047C	-0.738129
YBL011W	-0.104357	0.545645	SCT1			YHR177W	0.652211			YIL158W	-0.740926
YBL009W	-0.138629	0.466231	ALK2			YEL026W	0.651477			YOR208W	-0.74421
YBL008W	-0.0589246	0.803762	HIR1			YHR089C	0.651347			YOR246C	-0.744575
YBL005W	-0.649165	0.00232214	PDR3			YIL157C	0.650683			YNL225C	-0.74554
YBL004W	-0.251235	0.0909699	UTP20			YBR173C	0.648842			YBR291C	-0.74631
YBL002W	0.390029	0.00370565	HTB2			YKL049C	0.64775			YAL031C	-0.747367
YBR003W	-0.36543	0.0347144	COQ1			YJR034W	0.646225			YPL075W	-0.747784
YBR005W	-0.459713	0.0339335	RCR1			YDR077W	0.645443			YGR263C	-0.748168
YBR006W	-0.133078	0.622997	UGA2			YGL222C	0.64525			YBL020W	-0.749936
YBR010W	0.426135	0.000256171	HHT1			YLR435W	0.642866			YML107C	-0.751732
YBR016W	0.512584	0.00520997				YGL187C	0.641457			YAL029C	-0.752978
YBR020W	-1.64492	0.16648	GAL1			YBR011C	0.640394			YPL149W	-0.753419
YBR021W	-0.479351	0.00939955	FUR4			YDL129W	0.639314			YER132C	-0.754275
YBR022W	0.550225	0.0115197	POA1			YER095W	0.638873			YKR036C	-0.754371
YBR024W	-0.150021	0.56824	SCO2			YDR493W	0.638113			YJR137C	-0.756319
YBR030W	-0.903787	2.101e-05	RKM3			YJR067C	0.637616			YER060W	-0.756931
YBR031W	0.295582	0.0131107	RPL4A			YBL087C	0.635977			YNL003C	-0.758714
YBR033W	0.0302815	0.963151	EDS1			YDR511W	0.635681			YOR303W	-0.765346
YBR038W	0.275167	0.0357145	CHS2			YOL039W	0.6347			YOL140W	-0.765738
YBR039W	0.315548	0.00721424	ATP3			YOR045W	0.632631			YNL047C	-0.766202
YBR041W	-0.368938	0.0201923	FAT1			YKL214C	0.632512			YOR002W	-0.767388
YBR047W	-0.419437	0.390127	FMP23			YHR005C-A	0.631472			YDR005C	-0.767572
YBR048W	0.399473	0.00293878	RPS11B			YCR028C-A	0.630739			YOR315W	-0.770159
YBR054W	0.284675	0.159281	YRO2			YDR412W	0.630568			YGL175C	-0.771664
YBR056W	0.0909871	0.628827				YER092W	0.630234			YML104C	-0.771981
YBR056W-A	1.58164	3.79238e-07				YOR195W	0.629491			YKR027W	-0.772589
YBR071W	0.307469	0.0793916				YPL271W	0.629263			YER129W	-0.773062
YBR072W	0.647032	0.269691	HSP26			YNL090W	0.629121			YGL247W	-0.774725
YBR073W	-0.136893	0.362415	RDH54			YKL058W	0.628069			YJL162C	-0.77513
YBR074W	-1.02994	2.277e-13				YNL215W	0.627186			YOR030W	-0.775521
YBR076W	-0.443786	0.804308	ECM8			YLR292C	0.626797			YDR006C	-0.780242
YBR078W	0.309847	0.00190295	ECM33			YNL185C	0.626141			YPL164C	-0.782121
YBR083W	-0.293715	0.0810645	TEC1			YLR287C-A	0.625816			YBR299W	-0.782167
YBR084W	0.191089	0.0869538	MIS1			YGL044C	0.624051			YDR082W	-0.782178
YBR085W	-0.158167	0.732566	AAC3			YHR092C	0.621199			YDL180W	-0.782346
YBR087W	-0.262917	0.127685	RFC5			YIL065C	0.620529			YHR048W	-0.783545
YBR094W	-0.427516	0.00577098	PBY1			YER116C	0.61823			YOL036W	-0.783556
YBR096W	-0.42669	0.0184349				YHR121W	0.616847			YMR016C	-0.786298
YBR097W	-0.250283	0.215119	VPS15			YEL024W	0.613378			YAL020C	-0.786562
YBR098W	-0.793589	0.00256916	MMS4			YKR035W-A	0.611288			YHL023C	-0.787356
YBR103W	-0.451557	0.0122352	SIF2			YKR014C	0.609555			YLR001C	-0.790581
YBR104W	0.00580437	0.982374	YMC2			YKL054C	0.608281			YEL041W	-0.791507
YBR106W	-0.0817195	0.61292	PHO88			YLL019C	0.607833			YPL255W	-0.792086
YBR108W	-0.179588	0.356982	AIM3			YBR122C	0.604214			YDR073W	-0.793508
YBR110W	-0.485121	0.00353086	ALG1			YDR225W	0.604195			YBR098W	-0.793589
YBR111W-A	0.195127	0.494406	SUS1			YCL056C	0.602416			YDR174W	-0.794424
YBR114W	-0.466821	0.0243294	RAD16			YBL025W	0.599775			YEL016C	-0.794827
YBR118W	0.205556	0.0877195	TEF2			YGR037C	0.599348			YPL244C	-0.796256
YBR119W	-0.0452911	0.89476	MUD1			YDR162C	0.598854			YNR044W	-0.796522
YBR131W	-0.306806	0.256156	CCZ1			YGL191W	0.598211			YML031W	-0.79824
YBR135W	0.281477	0.115814	CKS1			YPR017C	0.598182			YER115C	-0.798985
YBR136W	-0.377065	0.0351718	MEC1			YBR009C	0.597101			YLR084C	-0.800533
YBR137W	0.0309943	0.892259				YJR099W	0.596182			YKL217W	-0.802024
YBR139W	-0.075377	0.690416				YFL005W	0.594314			YOR037W	-0.80268
YBR141W-A	1.9387	0.124415				YGR251W	0.593802			YOR249C	-0.804071
YBR142W	-0.0123788	0.954219	MAK5			YML010W	0.588139			YPL074W	-0.807587
YBR145W	-0.0732279	0.780798	ADH5			YDR381C-A	0.58756			YGL039W	-0.808545
YBR146W	0.917523	3.84534e-11	MRPS9			YDR054C	0.586483			YLR176C	-0.811364
YBR147W	0.0990569	0.873315	RTC2			YKR085C	0.586367			YER076C	-0.814906
YBR148W	-0.187586	0.804218	YSW1			YML128C	0.585607			YCR081W	-0.815581
YBR149W	0.121759	0.41861	ARA1			YDR462W	0.585027			YHR078W	-0.817676
YBR151W	0.272052	0.093705	APD1			YMR132C	0.584844			YOL116W	-0.819418
YBR152W	0.0422975	0.919025	SPP381			YGL043W	0.584704			YNR058W	-0.819827
YBR153W	0.533655	0.0207386	RIB7			YBR269C	0.584389			YBR045C	-0.820088
YBR155W	0.431388	0.0054053	CNS1			YGR209C	0.583396			YER088C-A	-0.820497
YBR158W	-0.50822	6.05409e-05	AMN1			YLR220W	0.582802			YLR273C	-0.82051
YBR159W	-0.0501958	0.764064	IFA38			YDR356W	0.582677			YGR024C	-0.822662
YBR160W	0.321651	0.0326882	CDC28			YOR281C	0.580694			YML042W	-0.823061
YBR161W	-0.193326	0.480019	CSH1			YDR169C	0.579836			YIL085C	-0.823853
YBR162W-A	0.868454	5.69826e-09	YSY6			YOR223W	0.579558			YHL026C	-0.824606
YBR163W	-1.23072	2.42611e-06	EXO5			YJL191W	0.578962			YNL125C	-0.824607
YBR165W	0.0974034	0.733421	UBS1			YDL002C	0.578526			YIR028W	-0.826245
YBR168W	-0.221823	0.511294	PEX32			YJR050W	0.578515			YJL092W	-0.827211
YBR171W	0.311996	0.0560911	SEC66			YML081C-A	0.578421			YGL134W	-0.827615
YBR175W	0.0154757	0.964428	SWD3			YLL014W	0.578124			YDR403W	-0.828917
YBR176W	-0.0878067	0.780484	ECM31			YOR327C	0.577738			YCR102C	-0.829893
YBR183W	0.0517288	0.877065	YPC1			YDL064W	0.57719			YDR242W	-0.832232
YBR184W	-0.445348	0.34278				YLR068W	0.576513			YDR034C	-0.832289
YBR186W	-1.73389	0.286605	PCH2			YDR374W-A	0.575408			YOL138C	-0.835112
YBR187W	0.223579	0.130001	GDT1			YMR091C	0.575345			YOL107W	-0.835548
YBR189W	0.111585	0.479059	RPS9B			YNR037C	0.574716			YEL072W	-0.83753
YBR192W	0.243833	0.241636	RIM2			YNL099C	0.574401			YGR056W	-0.837977
YBR194W	0.151392	0.684818	AIM4			YDL004W	0.574185			YLR426W	-0.842656
YBR199W	0.00540632	0.982131	KTR4			YNL007C	0.573181			YCL016C	-0.84315
YBR200W	0.0394223	0.858008	BEM1			YOR309C	0.572771			YBR235W	-0.844821
YBR201W	0.36492	0.289778	DER1			YLR204W	0.571968			YPR115W	-0.845011
YBR202W	-0.162185	0.293977	MCM7			YOR122C	0.571664			YOR148C	-0.847133
YBR203W	-0.410668	0.0864552	COS111			YPR100W	0.571011			YIL129C	-0.848645
YBR205W	-0.0203442	0.91295	KTR3			YJL072C	0.57028			YOL117W	-0.852933
YBR207W	-0.353298	0.0749216	FTH1			YOR065W	0.570057			YNL092W	-0.854527
YBR210W	-0.28846	0.348064	ERV15			YGR038W	0.568661			YIL139C	-0.860633
YBR212W	0.159534	0.338352	NGR1			YML094W	0.567016			YER015W	-0.860663
YBR213W	0.456231	0.120918	MET8			YNL148C	0.567003			YLL003W	-0.861614
YBR214W	0.13424	0.580668	SDS24			YHR152W	0.566366			YOR205C	-0.863716
YBR215W	0.235561	0.256535	HPC2			YPL173W	0.565197			YDR131C	-0.865058
YBR217W	-0.116496	0.799027	ATG12			YPL013C	0.564665			YLR214W	-0.866029
YBR225W	-0.0526382	0.855551				YKR006C	0.562114			YBR293W	-0.870055
YBR228W	-0.415536	0.187758	SLX1			YMR193W	0.562067			YLR165C	-0.876156
YBR230W-A	0.498882	0.074384				YER053C	0.561674			YPL089C	-0.876781
YBR233W	-0.234215	0.290259	PBP2			YDR529C	0.561577			YMR176W	-0.878607
YBR233W-A	0.81271	0.0084449	DAD3			YDL217C	0.561224			YOR154W	-0.880392
YBR235W	-0.844821	2.74939e-07				YMR244C-A	0.559209			YOR219C	-0.882074
YBR237W	-1.18988	2.97081e-08	PRP5			YNL137C	0.559003			YGL255W	-0.882898
YBR242W	-0.345019	0.0513458				YDR197W	0.558486			YML005W	-0.884218
YBR244W	-0.532345	0.0434594	GPX2			YKL122C	0.558029			YMR164C	-0.884411
YBR246W	0.0298001	0.894826	RRT2			YHR148W	0.557986			YLR242C	-0.884987
YBR250W	-1.58364	0.115078	SPO23			YKL002W	0.556808			YGR023W	-0.892667
YBR251W	-0.0163098	0.949359	MRPS5			YJR082C	0.552803			YOR034C	-0.894047
YBR252W	0.49594	0.00192349	DUT1			YGR215W	0.551998			YDR265W	-0.89611
YBR253W	0.260424	0.322799	SRB6			YNL151C	0.551966			YDR132C	-0.899729
YBR255W	-0.0716028	0.81031	MTC4			YPL146C	0.551657			YBR030W	-0.903787
YBR257W	-0.0632757	0.83118	POP4			YJR055W	0.550515			YOR018W	-0.906466
YBR259W	-0.553768	0.0401874				YBR022W	0.550225			YJL132W	-0.906873
YBR263W	-0.0115122	0.951948	SHM1			YOR111W	0.550083			YKR061W	-0.906903
YBR265W	0.131282	0.484171	TSC10			YEL054C	0.549433			YLR047C	-0.907858
YBR267W	0.243716	0.140522	REI1			YBL003C	0.549108			YNL087W	-0.910041
YBR268W	0.192992	0.394612	MRPL37			YOL012C	0.548857			YBL113C	-0.910574
YBR271W	-0.050913	0.862224				YKL167C	0.548856			YMR006C	-0.911354
YBR274W	-0.0757947	0.776891	CHK1			YHR132W-A	0.548833			YDR249C	-0.917819
YBR278W	-0.492657	0.0967093	DPB3			YPR063C	0.548816			YMR273C	-0.919737
YBR279W	0.0174862	0.94418	PAF1			YER050C	0.547915			YJL073W	-0.920742
YBR282W	0.998419	5.07293e-10	MRPL27			YCL005W-A	0.546042			YDR350C	-0.923543
YBR284W	-0.563886	0.237815				YJL096W	0.545896			YKR004C	-0.928229
YBR285W	0.0970533	0.938674				YOL067C	0.545426			YOL101C	-0.94097
YBR286W	0.0841255	0.506351	APE3			YLR223C	0.544089			YJR154W	-0.949849
YBR287W	-0.234693	0.160515				YHL009C	0.543811			YOR389W	-0.951104
YBR289W	0.103848	0.602714	SNF5			YNL208W	0.543778			YPL269W	-0.95389
YBR290W	0.271204	0.197043	BSD2			YBR221C	0.54377			YPL151C	-0.956599
YBR293W	-0.870055	0.00163289	VBA2			YGR162W	0.542846			YHR056C	-0.958055
YBR294W	-1.50834	0.00999165	SUL1			YPL108W	0.540324			YHR176W	-0.961276
YBR295W	-0.276093	0.289281	PCA1			YPR016C	0.538147			YJL126W	-0.963746
YBR297W	0.112937	0.73021	MAL33			YDR002W	0.537405			YMR066W	-0.96787
YBR299W	-0.782167	0.00418924	MAL32			YBR254C	0.537363			YFR005C	-0.971902
YCL064C	-0.526047	0.00364385	CHA1			YPL183W-A	0.537177			YKL149C	-0.972127
YCL061C	0.0650504	0.748454	MRC1			YKL016C	0.53661			YMR063W	-0.978658
YCL059C	0.245997	0.0646574	KRR1			YPL249C-A	0.535503			YIL092W	-0.978934
YCL057C-A	0.391739	0.0105283				YOR204W	0.534238			YCR106W	-0.979033
YCL056C	0.602416	0.0405641				YHR059W	0.534178			YDR530C	-0.979169
YCL052C	0.132085	0.435487	PBN1			YDL006W	0.534071			YFL049W	-0.980698
YCL050C	0.167595	0.209879	APA1			YBR153W	0.533655			YPR114W	-0.981768
YCL049C	-0.269921	0.0988259				YGR167W	0.532577			YEL025C	-0.983145
YCL047C	-0.153069	0.519328				YDL081C	0.532475			YOL055C	-0.990587
YCL045C	-0.166963	0.154285	EMC1			YLR009W	0.531327			YKL017C	-0.992439
YCL044C	-0.243929	0.134827	MGR1			YNR022C	0.531032			YHR017W	-0.994059
YCL043C	-0.111905	0.466957	PDI1			YBR234C	0.529878			YJL090C	-0.997831
YCL041C	0.277596	0.0572367				YER175C	0.529615			YBL088C	-0.998297
YCL038C	-0.216258	0.308876	ATG22			YDR020C	0.529145			YOR336W	-0.998355
YCL037C	-0.145711	0.19976	SRO9			YJR135W-A	0.528656			YMR180C	-0.998497
YCL035C	0.727447	3.23093e-09	GRX1			YBL099W	0.528196			YAL002W	-1.00034
YCL033C	0.353064	0.0692893	MXR2			YGL087C	0.526878			YKL222C	-1.00084
YCL031C	-0.0118268	0.952258	RRP7			YER100W	0.526544			YJR061W	-1.00498
YCL030C	-0.0983338	0.629347	HIS4			YNL147W	0.525742			YAL067C	-1.00736
YCL029C	0.0315176	0.896545	BIK1			YGR058W	0.523244			YIL023C	-1.0129
YCL026C-B	0.0035338	0.993651	HBN1			YOR265W	0.522835			YPR122W	-1.01729
YCL026C-A	0.275437	0.718837	FRM2			YGL166W	0.521099			YDR124W	-1.02148
YCL025C	-0.114845	0.523133	AGP1			YER131W	0.520532			YDR459C	-1.02784
YCL017C	0.279405	0.0213165	NFS1			YDR163W	0.519683			YBR074W	-1.02994
YCL016C	-0.84315	1.39278e-05	DCC1			YDR139C	0.51815			YJR127C	-1.02995
YCL012C	0.275146	0.295273				YNL122C	0.518132			YJL025W	-1.03012
YCL011C	-0.345052	0.00525081	GBP2			YGR021W	0.516854			YOL068C	-1.03117
YCL010C	-0.45784	0.00529248	SGF29			YBR262C	0.516187			YOR363C	-1.03185
YCL009C	0.306592	0.0327896	ILV6			YEL050C	0.51572			YLR381W	-1.03308
YCL008C	-0.558535	0.00102002	STP22			YGR118W	0.513962			YIR029W	-1.0331
YCL002C	-0.625323	0.0158818				YOR125C	0.513816			YOR023C	-1.03332
YCR002C	0.0397789	0.809644	CDC10			YGR165W	0.513808			YOL063C	-1.04658
YCR004C	0.348319	0.00260304	YCP4			YBL001C	0.513807			YNL221C	-1.05341
YCR005C	-0.374579	0.0139641	CIT2			YOL123W	0.513413			YHR096C	-1.05823
YCR007C	-0.204514	0.654039				YBR016W	0.512584			YGL223C	-1.06363
YCR009C	-0.0659197	0.705149	RVS161			YLL041C	0.512222			YOR137C	-1.07181
YCR010C	1.89051	0.112265	ADY2			YPR073C	0.509203			YHL017W	-1.07219
YCR011C	-0.300183	0.0126011	ADP1			YBL093C	0.509046			YKR044W	-1.07252
YCR014C	1.5615	0.00119498	POL4			YDL065C	0.508543			YIL015W	-1.09482
YCR015C	-0.0968949	0.732156				YLR406C	0.507951			YIR039C	-1.09802
YCR017C	-0.394851	0.00575342	CWH43			YPR143W	0.507367			YJL193W	-1.10409
YCR020C	-1.51854	0.00120293	PET18			YPL024W	0.506522			YLL056C	-1.10926
YCR020C-A	0.729148	0.000287384	MAK31			YER072W	0.506424			YEL030W	-1.11035
YCR021C	0.0230638	0.965538	HSP30			YDR525W-A	0.505743			YML056C	-1.11059
YCR022C	-2.6209	0.337326				YKL138C	0.504937			YHR150W	-1.11374
YCR023C	-0.513269	0.00348271				YOL111C	0.504867			YMR034C	-1.11783
YCR024C	-0.0351574	0.903055	SLM5			YDR088C	0.504438			YIL046W	-1.11795
YCR024C-B	-0.283438	0.72733				YCL028W	0.504003			YKR050W	-1.12383
YCR024C-A	0.131156	0.55383	PMP1			YPL145C	0.502598			YOR380W	-1.12747
YCR025C	-1.90659	0.479059				YCR071C	0.502201			YCL048W	-1.12749
YCR026C	0.145923	0.338134	NPP1			YJR104C	0.501199			YGR289C	-1.12999
YCR027C	0.773389	0.000176268	RHB1			YMR188C	0.500778			YGR087C	-1.1326
YCR028C	-0.0781081	0.700656	FEN2			YER002W	0.500737			YJL056C	-1.13298
YCR028C-A	0.630739	3.1742e-07	RIM1			YKL082C	0.500417			YDL109C	-1.13368
YCR030C	-0.113885	0.492562	SYP1			YDR083W	0.500352			YDR147W	-1.13995
YCR031C	0.277731	0.0330554	RPS14A			YHR088W	0.500187			YLR457C	-1.14882
YCR035C	0.0918391	0.62452	RRP43			YKL063C	0.499025			YPL034W	-1.15077
YCR037C	-0.0525004	0.803047	PHO87			YBR230W-A	0.498882			YKR058W	-1.16319
YCR038C	-1.46662	3.14485e-09	BUD5			YFR032C-A	0.498127			YPR068C	-1.1653
YCR042C	-0.112716	0.481109	TAF2			YBR252W	0.49594			YNL144C	-1.16725
YCR043C	0.418804	0.00269114				YDL160C	0.495445			YKL198C	-1.1691
YCR044C	-0.488125	0.0054095	PER1			YGR203W	0.493884			YPR085C	-1.17324
YCR046C	0.346258	0.0463404	IMG1			YHR097C	0.493246			YOL159C	-1.1793
YCR047C	0.424616	0.0150522	BUD23			YFL023W	0.492913			YOR342C	-1.18202
YCR054C	-0.180723	0.325114	CTR86			YGL058W	0.491723			YBL019W	-1.18273
YCR057C	-0.085846	0.583114	PWP2			YPL190C	0.49155			YGR188C	-1.18388
YCR059C	0.087927	0.648679	YIH1			YDR092W	0.490363			YHR015W	-1.18748
YCR064C	1.31009	0.46114				YNL307C	0.490337			YBR237W	-1.18988
YCR067C	-0.104779	0.484913	SED4			YNL113W	0.48973			YLR213C	-1.19404
YCR071C	0.502201	0.00629254	IMG2			YPL239W	0.489355			YGR070W	-1.19552
YCR072C	0.0485433	0.768868	RSA4			YOL143C	0.489143			YNL187W	-1.19854
YCR073C	-1.2829	2.77333e-14	SSK22			YBR188C	0.488003			YHR199C	-1.2067
YCR075C	-0.572108	0.0092852	ERS1			YNR007C	0.487978			YBR270C	-1.21129
YCR076C	-0.279349	0.201355				YKL218C	0.485196			YDR421W	-1.21379
YCR077C	0.221927	0.0618458	PAT1			YPL127C	0.484863			YML076C	-1.22704
YCR084C	0.225648	0.0782998	TUP1			YMR311C	0.483612			YJL058C	-1.2292
YCR087C-A	0.04719	0.835529				YJL184W	0.482946			YOR005C	-1.2305
YCR090C	-0.245729	0.241696				YOR293W	0.482938			YJR110W	-1.23066
YCR092C	-0.141221	0.505306	MSH3			YJL001W	0.481023			YBR163W	-1.23072
YCR095C	-0.37954	0.0637735	OCA4			YER120W	0.480851			YGL154C	-1.23356
YCR098C	-0.556677	0.37762	GIT1			YKL056C	0.480294			YML023C	-1.24652
YCR102C	-0.829893	0.0532441				YIR037W	0.480283			YIR007W	-1.24654
YCL063W	-0.346336	0.0784735	VAC17							YKL201C	-1.25151
YCL058W-A	0.155509	0.589655	ADF1							YOR026W	-1.27168
YCL057W	-0.14025	0.259714	PRD1							YLL063C	-1.27301
YCL055W	0.055719	0.819083	KAR4							YCR073C	-1.2829
YCL054W	0.098391	0.568626	SPB1							YKL220C	-1.28341
YCL051W	0.119535	0.574204	LRE1							YNL142W	-1.28493
YCL048W	-1.12749	0.0960346	SPS22							YIL049W	-1.30078
YCL040W	0.0140378	0.980191	GLK1							YMR190C	-1.30464
YCL039W	-0.58731	0.000204927	GID7							YFL057C	-1.30698
YCL036W	-0.336235	0.0411577	GFD2							YPR194C	-1.30701
YCL034W	-0.0307044	0.872671	LSB5							YNR068C	-1.33764
YCL032W	-0.128438	0.540855	STE50							YNL179C	-1.3456
YCL028W	0.504003	8.08325e-05	RNQ1							YPL216W	-1.34853
YCL027W	-0.51374	0.238883	FUS1							YLR266C	-1.35155
YCL024W	-0.193306	0.261485	KCC4							YLR173W	-1.35208
YCL021W-A	1.84059	0.0301312								YER158C	-1.36156
YCL018W	0.305283	0.088127	LEU2							YIR023W	-1.36844
YCL014W	-0.338971	0.033401	BUD3							YGR212W	-1.37135
YCL005W-A	0.546042	6.56065e-06	VMA9							YBL060W	-1.3723
YCL005W	-0.672464	0.00149342	LDB16							YNL279W	-1.37402
YCL004W	-0.171487	0.51579	PGS1							YBL106C	-1.38288
YCL001W	-0.101801	0.52543	RER1							YHR120W	-1.38833
YCR003W	0.196702	0.298637	MRPL32							YER184C	-1.40101
YCR008W	-0.0942451	0.70122	SAT4							YGR154C	-1.40266
YCR012W	0.398426	0.00202389	PGK1							YJL110C	-1.40745
YCR016W	0.403688	0.00566839								YGR168C	-1.4092
YCR019W	0.207721	0.3806	MAK32							YML002W	-1.41077
YCR020W-B	1.57769	1.81555e-18	HTL1							YJR152W	-1.42406
YCR032W	-0.365401	0.0649745	BPH1							YLR452C	-1.43896
YCR033W	-0.428223	0.010001	SNT1							YDR273W	-1.44363
YCR034W	0.00702972	0.969726	FEN1							YER041W	-1.44771
YCR036W	-0.353136	0.0106885	RBK1							YAL040C	-1.46547
YCR045W-A	-2.84386	0.000809144								YJR120W	-1.46577
YCR048W	-0.513522	0.000807216	ARE1							YCR038C	-1.46662
YCR051W	0.309093	0.0239596								YDR160W	-1.48837
YCR052W	0.407817	0.000738938	RSC6							YPL068C	-1.49113
YCR053W	0.0952548	0.491597	THR4							YNL249C	-1.4914
YCR061W	-0.0320002	0.89276								YFL034C-A	-1.50479
YCR063W	0.397921	0.0869465	BUD31							YBR294W	-1.50834
YCR065W	-0.19842	0.239766	HCM1							YCR020C	-1.51854
YCR066W	-0.675284	0.000924691	RAD18							YHL035C	-1.56738
YCR068W	-0.142498	0.542059	ATG15							YNR059W	-1.57527
YCR069W	-0.27348	0.0776362	CPR4							YEL023C	-1.59404
YCR073W-A	0.351515	0.0207386	SOL2							YHR204W	-1.61397
YCR075W-A	0.258754	0.425016								YIL013C	-1.62042
YCR079W	0.0456407	0.894826	PTC6							YOR313C	-1.6294
YCR081W	-0.815581	1.36456e-07	SRB8							YDL231C	-1.64674
YCR082W	0.18587	0.337768	AHC2							YNL117W	-1.66373
YCR083W	0.0932549	0.712661	TRX3							YER066W	-1.66698
YCR086W	-0.0273903	0.933825	CSM1							YOL164W	-1.67308
YCR088W	0.299963	0.0299264	ABP1							YDR336W	-1.68197
YCR089W	-0.416836	0.28443	FIG2							YLR004C	-1.6983
YCR091W	-0.0400115	0.908283	KIN82							YHL040C	-1.70443
YCR093W	-0.441305	4.63647e-05	CDC39							YJR036C	-1.71512
YCR094W	0.000212286	0.999917	CDC50							YKR069W	-1.71704
YCR095W-A	-2.83023	0.140684								YGL256W	-1.72954
YCR097W	-0.345128	0.921938	HMRA1							YAR023C	-1.74133
YCR105W	-0.162995	0.805699	ADH7							YBR004C	-1.78846
YCR106W	-0.979033	8.26358e-08	RDS1							YKL188C	-1.79813
YCR107W	1.84601	0.000211869	AAD3							YFL050C	-1.81252
YDL243C	1.07164	0.0770902	AAD4							YIL099W	-1.8201
YDL239C	-2.5875	0.000289873	ADY3							YPL066W	-1.82642
YDL238C	0.0829407	0.826271	GUD1							YLR037C	-1.85494
YDL235C	-0.0924813	0.653547	YPD1							YOL014W	-1.86504
YDL234C	-0.182225	0.312328	GYP7							YFR020W	-1.86985
YDL231C	-1.64674	1.00071e-12	BRE4							YDR332W	-1.87171
YDL227C	-0.159009	0.347021	HO							YJR147W	-1.89117
YDL226C	0.292604	0.0270798	GCS1							YLR130C	-1.9094
YDL224C	-0.0295767	0.884886	WHI4							YOR328W	-1.91269
YDL222C	3.5044	1.03005e-09	FMP45							YMR065W	-1.97655
YDL220C	-0.292774	0.204133	CDC13							YLR318W	-2.01601
YDL217C	0.561224	0.00136456	TIM22							YOL015W	-2.02391
YDL216C	0.167086	0.665976	RRI1							YOL154W	-2.05557
YDL215C	0.101916	0.575606	GDH2							YBR298C	-2.08014
YDL214C	1.43316	0.124627	PRR2							YAL064W-B	-2.17819
YDL213C	0.170508	0.350539	NOP6							YLL051C	-2.17852
YDL211C	-0.693975	0.0625738								YNR060W	-2.32901
YDL209C	0.374214	0.133	CWC2							YOR010C	-2.38915
YDL205C	-0.110084	0.540855	HEM3							YDR223W	-2.39965
YDL203C	-0.24134	0.196049	ACK1							YOR349W	-2.45016
YDL200C	-0.111827	0.735988	MGT1							YLR263W	-2.45962
YDL199C	-0.0545597	0.921956								YDL197C	-2.4642
YDL198C	0.0647657	0.668695	GGC1							YIR031C	-2.49958
YDL197C	-2.4642	3.44193e-28	ASF2							YER028C	-2.55591
YDL190C	0.0701201	0.696251	UFD2							YDL239C	-2.5875
YDL188C	0.331208	0.0275672	PPH22							YIL029C	-2.61762
YDL187C	-5.15001	0.00624063								YER138W-A	-2.78637
YDL184C	2.42211	5.41962e-09	RPL41A							YCR045W-A	-2.84386
YDL183C	-0.227928	0.621209								YOR377W	-2.87076
YDL177C	-0.357076	0.335728								YHL016C	-2.91405
YDL175C	0.2408	0.310129	AIR2							YIR019C	-2.95703
YDL174C	-0.0836	0.62452	DLD1							YOR383C	-2.96541
YDL171C	-0.250894	0.0900445	GLT1							YEL009C-A	-2.98988
YDL169C	0.498442	0.412873	UGX2							YMR103C	-3.14036
YDL167C	-0.313044	0.0464309	NRP1							YOL158C	-3.26932
YDL166C	0.394225	0.021239	FAP7							YNL014W	-3.30597
YDL164C	-0.165338	0.355211	CDC9							YOR009W	-3.40671
YDL160C-A	0.898644	0.000587715								YBR292C	-3.43489
YDL160C	0.495445	6.42002e-06	DHH1							YKL209C	-3.43725
YDL157C	0.450071	0.0196781								YMR086C-A	-3.49457
YDL153C	0.390604	0.0137444	SAS10							YPR146C	-3.49942
YDL148C	0.32664	0.0142345	NOP14							YAL063C-A	-3.5448
YDL145C	0.0340239	0.832585	COP1							YIR020C	-3.70834
YDL144C	0.180341	0.361301								YBR099C	-3.8324
YDL142C	-0.150668	0.621075	CRD1							YER039C	-3.9423
YDL140C	-0.29697	0.0251847	RPO21							YER188C-A	-4.08142
YDL139C	0.141278	0.753074	SCM3							YDR003W-A	-4.20388
YDL135C	0.477437	0.00564129	RDI1							YGL199C	-4.4378
YDL134C	0.414002	0.00138055	PPH21							YNL109W	-4.61164
YDL133C-A	2.0972	3.33009e-07	RPL41B							YOR343C	-4.65425
YDL126C	0.374042	0.000481025	CDC48							YLR294C	-4.6609
YDL125C	-0.522327	7.15596e-06	HNT1							YOR376W-A	-4.95802
YDL121C	0.0525777	0.826271								YDL187C	-5.15001
YDL119C	0.080727	0.789907								YBL048W	-5.21549
YDL115C	-0.0317103	0.910385	IWR1							YHL037C	-6.16821
YDL113C	-0.35443	0.086716	ATG20							YDR133C	-6.21886
YDL111C	0.267254	0.0758541	RRP42							YMR013W-A	-6.33373
YDL110C	0.460202	0.00448229	TMA17							YFL026W	-10.1395
YDL109C	-1.13368	0.00277344
YDL106C	0.179267	0.374191	PHO2
YDL104C	-0.0698673	0.856579	QRI7
YDL103C	0.129435	0.427257	QRI1
YDL101C	-0.136765	0.508857	DUN1
YDL100C	0.0490937	0.727334	GET3
YDL098C	0.154384	0.679847	SNU23
YDL097C	0.318954	0.00700972	RPN6
YDL094C	-3.86772	0.160201
YDL091C	-0.167424	0.573696	UBX3
YDL090C	-0.146408	0.552016	RAM1
YDL088C	-0.441631	0.00374221	ASM4
YDL087C	0.184319	0.543659	LUC7
YDL086C-A	1.69812	0.198022
YDL085C-A	1.46096	3.48341e-08
YDL083C	0.320234	0.00256139	RPS16B
YDL081C	0.532475	2.01906e-05	RPP1A
YDL080C	-0.456069	0.0459239	THI3
YDL079C	1.2009	0.0270432	MRK1
YDL078C	0.186439	0.235813	MDH3
YDL077C	-0.380795	0.0317226	VAM6
YDL076C	-0.26714	0.215591	RXT3
YDL074C	0.19609	0.176996	BRE1
YDL072C	-0.219871	0.206238	YET3
YDL069C	-0.414424	0.282779	CBS1
YDL067C	1.30067	8.53639e-23	COX9
YDL065C	0.508543	0.00186261	PEX19
YDL063C	-0.207089	0.229842
YDL061C	1.23033	3.25262e-06	RPS29B
YDL059C	-0.0609081	0.894826	RAD59
YDL055C	0.245537	0.035951	PSA1
YDL054C	-0.349243	0.103386	MCH1
YDL053C	0.139852	0.442559	PBP4
YDL052C	-0.544223	0.000298876	SLC1
YDL049C	0.0324673	0.960108	KNH1
YDL048C	-0.0984876	0.813858	STP4
YDL045C	-0.192138	0.475314	FAD1
YDL044C	-0.178464	0.477974	MTF2
YDL043C	0.667254	0.00119906	PRP11
YDL042C	-0.210395	0.288342	SIR2
YDL040C	-0.142454	0.290059	NAT1
YDL039C	3.40823	5.62735e-08	PRM7
YDL036C	0.179401	0.539057	PUS9
YDL035C	-0.281587	0.192813	GPR1
YDL033C	-0.677066	0.00889038	SLM3
YDL028C	0.0281799	0.924005	MPS1
YDL027C	-0.133057	0.688577
YDL025C	-0.0769473	0.812198	RTK1
YDL024C	0.794649	0.302352	DIA3
YDL020C	0.0860571	0.622304	RPN4
YDL019C	0.201537	0.195849	OSH2
YDL018C	-0.169061	0.49762	ERP3
YDL015C	-0.177573	0.154988	TSC13
YDL012C	0.461664	0.00771414
YDL009C	7.9318	0.0106618
YDL005C	-0.0718371	0.752265	MED2
YDL002C	0.578526	0.00136273	NHP10
YDR001C	0.00597638	0.979028	NTH1
YDR005C	-0.767572	1.71689e-06	MAF1
YDR006C	-0.780242	1.20287e-07	SOK1
YDR008C	3.092	5.77167e-07
YDR016C	0.109216	0.754866	DAD1
YDR017C	-0.287325	0.065708	KCS1
YDR018C	-0.216419	0.821139
YDR019C	0.0630535	0.777475	GCV1
YDR020C	0.529145	0.0518074	DAS2
YDR022C	0.274215	0.501736	CIS1
YDR026C	-0.702064	0.000319177
YDR027C	-0.167272	0.392938	VPS54
YDR028C	0.321945	0.0127366	REG1
YDR030C	-0.112283	0.79342	RAD28
YDR032C	0.271477	0.0444416	PST2
YDR034C	-0.832289	4.64168e-08	LYS14
YDR036C	-0.330384	0.0490314	EHD3
YDR038C	0.000327033	0.999174	ENA5
YDR042C	0.311005	0.762439
YDR045C	0.400657	0.065509	RPC11
YDR046C	-0.00993898	0.964115	BAP3
YDR048C	-0.760644	0.694065
YDR050C	0.298715	0.0220791	TPI1
YDR051C	0.0494237	0.826543	DET1
YDR052C	-0.00217012	0.993694	DBF4
YDR054C	0.586483	8.61798e-07	CDC34
YDR056C	-0.0361268	0.872755
YDR058C	0.0712905	0.892264	TGL2
YDR059C	0.66939	0.00357327	UBC5
YDR066C	0.141114	0.738855	RTR2
YDR067C	0.0569851	0.865194	OCA6
YDR069C	-0.0448527	0.873315	DOA4
YDR070C	1.45344	0.0355411	FMP16
YDR071C	0.0218042	0.91294	PAA1
YDR072C	-0.375636	0.00955433	IPT1
YDR078C	-0.284774	0.518491	SHU2
YDR079C-A	0.306181	0.337326	TFB5
YDR081C	-0.278048	0.175428	PDC2
YDR084C	0.0612064	0.797156	TVP23
YDR085C	0.366261	0.108426	AFR1
YDR086C	1.44106	1.11434e-36	SSS1
YDR087C	0.226974	0.14307	RRP1
YDR088C	0.504438	0.0384491	SLU7
YDR090C	0.0172144	0.954194
YDR091C	0.078058	0.560496	RLI1
YDR097C	0.08201	0.628469	MSH6
YDR098C	0.0274255	0.910088	GRX3
YDR101C	-0.205872	0.112097	ARX1
YDR104C	-0.17597	0.584564	SPO71
YDR105C	-0.299549	0.112097	TMS1
YDR107C	-0.297096	0.381423	TMN2
YDR109C	-0.477966	0.0366282
YDR111C	-0.0426285	0.888983	ALT2
YDR113C	0.184204	0.401729	PDS1
YDR116C	0.33811	0.0441818	MRPL1
YDR117C	-0.13966	0.46204	TMA64
YDR120C	-0.0694753	0.648654	TRM1
YDR123C	0.192094	0.479267	INO2
YDR125C	0.410332	0.32817	ECM18
YDR129C	0.365323	0.000485712	SAC6
YDR130C	0.0201555	0.951948	FIN1
YDR131C	-0.865058	0.000256236
YDR132C	-0.899729	0.000286628
YDR133C	-6.21886	0
YDR135C	-0.483386	0.000533576	YCF1
YDR139C	0.51815	0.0143774	RUB1
YDR141C	-0.486773	9.22769e-05	DOP1
YDR142C	-0.165958	0.58978	PEX7
YDR143C	0.0755874	0.700328	SAN1
YDR144C	-0.411359	0.00216932	MKC7
YDR146C	0.373907	0.00853327	SWI5
YDR148C	0.466713	0.000378807	KGD2
YDR151C	0.0106444	0.971158	CTH1
YDR153C	0.0866698	0.590876	ENT5
YDR162C	0.598854	0.00106712	NBP2
YDR164C	-0.566469	0.00119498	SEC1
YDR166C	-0.151811	0.39148	SEC5
YDR169C	0.579836	0.0011607	STB3
YDR170C	0.0730934	0.598083	SEC7
YDR173C	0.44622	0.0804293	ARG82
YDR175C	0.275556	0.0981725	RSM24
YDR179C	-0.130892	0.782023	CSN9
YDR181C	-0.115332	0.654288	SAS4
YDR185C	0.0651162	0.91503	UPS3
YDR186C	-0.338026	0.0240779
YDR190C	0.195196	0.173041	RVB1
YDR192C	0.273939	0.161782	NUP42
YDR194C	0.185527	0.186386	MSS116
YDR196C	0.159981	0.46304	CAB5
YDR198C	-0.566661	0.00760106	RKM2
YDR200C	-0.454296	0.0305329	VPS64
YDR202C	-0.170793	0.494243	RAV2
YDR207C	-0.611002	0.00357259	UME6
YDR217C	-0.172149	0.41589	RAD9
YDR218C	0.171768	0.908283	SPR28
YDR219C	-0.074457	0.756396	MFB1
YDR224C	0.189869	0.207205	HTB1
YDR228C	-0.324614	0.0856003	PCF11
YDR231C	-0.257696	0.218978	COX20
YDR233C	-0.188083	0.112828	RTN1
YDR236C	-0.447885	0.0401153	FMN1
YDR238C	0.227312	0.0416814	SEC26
YDR239C	-0.0324602	0.907353
YDR240C	-0.196625	0.466793	SNU56
YDR243C	0.239416	0.259104	PRP28
YDR248C	0.0721256	0.807412
YDR249C	-0.917819	0.00404173
YDR253C	-0.379276	0.519328	MET32
YDR255C	0.359695	0.19814	RMD5
YDR256C	0.757286	0.413247	CTA1
YDR257C	-0.177884	0.291358	RKM4
YDR258C	0.383247	0.0100642	HSP78
YDR259C	0.0734972	0.894826	YAP6
YDR260C	0.884984	1.10264e-05	SWM1
YDR261C	-0.380438	0.0124483	EXG2
YDR263C	0.899901	0.0096729	DIN7
YDR264C	-0.00230714	0.990873	AKR1
YDR266C	0.285765	0.0479249
YDR267C	-0.0742085	0.740947	CIA1
YDR276C	1.30492	6.0622e-32	PMP3
YDR277C	0.147071	0.530632	MTH1
YDR281C	0.369624	0.565793	PHM6
YDR282C	-2.97849e-05	0.999988
YDR283C	-0.016011	0.946723	GCN2
YDR284C	0.172336	0.389341	DPP1
YDR286C	0.290698	0.40377
YDR289C	0.219724	0.249214	RTT103
YDR292C	0.0769272	0.651962	SRP101
YDR293C	0.124121	0.379265	SSD1
YDR294C	-0.36543	0.00572489	DPL1
YDR295C	-0.305154	0.11696	HDA2
YDR298C	0.720568	1.88077e-08	ATP5
YDR300C	0.0156323	0.948954	PRO1
YDR303C	-0.123556	0.482278	RSC3
YDR304C	-0.241513	0.144857	CPR5
YDR305C	-0.102196	0.718145	HNT2
YDR306C	0.277213	0.238392
YDR308C	0.845649	6.37562e-06	SRB7
YDR309C	0.11809	0.43532	GIC2
YDR310C	-0.00325869	0.988819	SUM1
YDR313C	0.265144	0.350351	PIB1
YDR314C	0.0448559	0.912702	RAD34
YDR315C	-0.151589	0.733076	IPK1
YDR319C	-0.480299	0.0593021
YDR320C	-0.108623	0.543575	SWA2
YDR320C-A	-0.454009	0.169844	DAD4
YDR322C-A	0.880225	4.55974e-09	TIM11
YDR323C	-0.0869291	0.832394	PEP7
YDR324C	0.0951346	0.542059	UTP4
YDR326C	0.0188872	0.939549	YSP2
YDR328C	0.792067	5.23429e-12	SKP1
YDR329C	-0.14731	0.473382	PEX3
YDR333C	0.117787	0.494243
YDR338C	-0.321373	0.168843
YDR339C	0.0506419	0.809624	FCF1
YDR341C	0.0541091	0.689564
YDR342C	0.0553372	0.906074	HXT7
YDR343C	0.0364787	0.939549	HXT6
YDR345C	0.707213	9.48835e-06	HXT3
YDR346C	0.127646	0.354025	SVF1
YDR348C	-0.0391795	0.839008
YDR349C	-0.500416	0.00087862	YPS7
YDR350C	-0.923543	7.10581e-07	ATP22
YDR357C	0.393033	0.107526	CNL1
YDR359C	-0.353716	0.113976	EAF1
YDR361C	0.109719	0.523893	BCP1
YDR362C	0.00291432	0.992323	TFC6
YDR364C	-0.391627	0.0554571	CDC40
YDR365C	0.328863	0.0205648	ESF1
YDR366C	-0.469035	0.752786
YDR369C	0.0938345	0.722576	XRS2
YDR370C	-0.251359	0.347427
YDR372C	0.352816	0.00418924	VPS74
YDR375C	-0.289063	0.150461	BCS1
YDR378C	0.685746	1.5669e-05	LSM6
YDR379C-A	-0.446337	0.346603
YDR381C-A	0.58756	0.0524848
YDR383C	-0.643653	0.0482868	NKP1
YDR384C	0.155754	0.382351	ATO3
YDR387C	-0.539683	0.0334346
YDR390C	-0.184061	0.315337	UBA2
YDR391C	-0.250822	0.235813
YDR397C	0.285108	0.0987967	NCB2
YDR402C	-0.403828	0.722576	DIT2
YDR404C	-0.0182497	0.936291	RPB7
YDR407C	-0.423164	0.00832377	TRS120
YDR408C	0.0752219	0.702782	ADE8
YDR410C	-0.370119	0.120593	STE14
YDR411C	-0.1378	0.455981	DFM1
YDR414C	0.144477	0.613767	ERD1
YDR415C	-0.433219	0.0145136
YDR422C	0.163826	0.383109	SIP1
YDR423C	0.0599337	0.806602	CAD1
YDR424C	0.45482	0.0172697	DYN2
YDR428C	0.262685	0.253563	BNA7
YDR429C	0.469007	1.8042e-05	TIF35
YDR430C	0.194996	0.19976	CYM1
YDR435C	-0.589561	0.00755129	PPM1
YDR441C	0.928306	2.75807e-08	APT2
YDR443C	-0.249122	0.226275	SSN2
YDR445C	1.18752	0.448351
YDR447C	0.0909562	0.470205	RPS17B
YDR449C	0.132581	0.409827	UTP6
YDR451C	0.0058222	0.983002	YHP1
YDR453C	0.770442	0.0715002	TSA2
YDR454C	0.397757	0.00269717	GUK1
YDR458C	0.0692892	0.732281	HEH2
YDR459C	-1.02784	0.000116549	PFA5
YDR461C-A	0.206264	0.65993
YDR465C	0.256943	0.0994661	RMT2
YDR468C	0.688104	0.000208557	TLG1
YDR470C	0.305221	0.129056	UGO1
YDR473C	0.194139	0.45312	PRP3
YDR475C	-0.25086	0.286837	JIP4
YDR476C	0.355599	0.060272
YDR479C	-0.436789	0.0369424	PEX29
YDR481C	-0.169204	0.221234	PHO8
YDR482C	0.748857	0.0169268	CWC21
YDR485C	-0.0486148	0.858008	VPS72
YDR486C	0.399675	0.0206558	VPS60
YDR487C	0.069209	0.735539	RIB3
YDR488C	0.652221	0.0126716	PAC11
YDR490C	-0.114914	0.602981	PKH1
YDR495C	0.0560598	0.86139	VPS3
YDR496C	0.0112909	0.953889	PUF6
YDR497C	-0.32973	0.0168462	ITR1
YDR498C	0.133149	0.561719	SEC20
YDR500C	0.0672532	0.722576	RPL37B
YDR502C	0.266781	0.084904	SAM2
YDR503C	-0.360779	0.162226	LPP1
YDR504C	0.917038	0.300443	SPG3
YDR505C	0.225231	0.11611	PSP1
YDR506C	0.714002	0.0220791
YDR507C	-0.00414253	0.983727	GIN4
YDR508C	0.0861076	0.518798	GNP1
YDR512C	0.307552	0.17101	EMI1
YDR514C	-0.116026	0.608624
YDR516C	0.0749083	0.726105	EMI2
YDR520C	-0.327971	0.240994	URC2
YDR523C	-0.114456	0.91295	SPS1
YDR524C	0.013425	0.964138	AGE1
YDR524C-B	1.67119	6.19138e-36
YDR524C-A	-0.924374	0.748254
YDR529C	0.561577	1.2441e-06	QCR7
YDR530C	-0.979169	9.76608e-08	APA2
YDR532C	-0.419088	0.125455	KRE28
YDR533C	-0.040413	0.889809	HSP31
YDR534C	-0.698923	0.484711	FIT1
YDR535C	-0.0725202	0.978231
YDR540C	0.633657	0.167838	IRC4
YDR541C	-0.619894	0.048613
YDL248W	0.189535	0.217123	COS7
YDL244W	-0.311893	0.427388	THI13
YDL242W	2.0729	0.193192
YDL241W	0.964039	8.68791e-06
YDL240W	-0.0215368	0.939027	LRG1
YDL237W	-0.67155	3.39866e-05	AIM6
YDL236W	0.162125	0.251691	PHO13
YDL233W	-0.223178	0.336408
YDL232W	0.461502	0.106071	OST4
YDL230W	-0.419855	0.107473	PTP1
YDL229W	-0.00533977	0.972231	SSB1
YDL225W	-0.022879	0.923599	SHS1
YDL221W	-2.46227	0.43889
YDL219W	0.36303	0.0488656	DTD1
YDL218W	0.417745	0.661238
YDL212W	-0.132776	0.375368	SHR3
YDL210W	-0.462652	0.494406	UGA4
YDL208W	0.132633	0.395222	NHP2
YDL207W	-0.378786	0.0778509	GLE1
YDL206W	-0.428411	0.236436
YDL204W	1.73115	8.8134e-18	RTN2
YDL202W	0.00771103	0.975362	MRPL11
YDL201W	0.0413016	0.830849	TRM8
YDL195W	-0.209572	0.0753615	SEC31
YDL194W	-0.101325	0.799027	SNF3
YDL193W	-0.123084	0.573696	NUS1
YDL192W	0.153228	0.323551	ARF1
YDL191W	0.058471	0.722576	RPL35A
YDL189W	-0.449292	0.0145136	RBS1
YDL185W	0.218286	0.050357	VMA1
YDL182W	0.161676	0.203851	LYS20
YDL181W	1.12172	1.81113e-11	INH1
YDL180W	-0.782346	0.000394633
YDL179W	-0.164254	0.424026	PCL9
YDL178W	-0.0803782	0.617535	DLD2
YDL176W	-0.310979	0.234654
YDL173W	0.234597	0.153129	PAR32
YDL170W	-0.307873	0.185844	UGA3
YDL168W	0.317559	0.00837949	SFA1
YDL165W	0.223109	0.313481	CDC36
YDL161W	0.42845	0.00304176	ENT1
YDL159W	-0.198183	0.389341	STE7
YDL156W	0.18649	0.529781
YDL155W	0.113394	0.643224	CLB3
YDL154W	-0.319837	0.672572	MSH5
YDL150W	0.44511	0.0117426	RPC53
YDL149W	0.196476	0.5571	ATG9
YDL147W	0.250153	0.0377403	RPN5
YDL146W	-0.172122	0.670281	LDB17
YDL143W	-0.10806	0.427535	CCT4
YDL141W	-0.0929285	0.601261	BPL1
YDL138W	-0.721899	0.022912	RGT2
YDL137W	0.043857	0.813858	ARF2
YDL136W	0.0442106	0.797013	RPL35B
YDL133W	0.0562745	0.843291
YDL132W	-0.00483507	0.981784	CDC53
YDL131W	0.208619	0.0778246	LYS21
YDL130W-A	1.28045	1.19781e-08	STF1
YDL130W	0.184461	0.176843	RPP1B
YDL129W	0.639314	0.0882367
YDL128W	-0.100041	0.52251	VCX1
YDL127W	0.212284	0.47514	PCL2
YDL124W	0.182968	0.157316
YDL123W	0.950697	2.46338e-05	SNA4
YDL122W	-0.00444598	0.984449	UBP1
YDL120W	0.654201	2.77584e-05	YFH1
YDL117W	0.0355224	0.870714	CYK3
YDL116W	-0.250397	0.101659	NUP84
YDL112W	-0.0255243	0.899856	TRM3
YDL108W	-0.247581	0.2577	KIN28
YDL107W	-0.382459	0.166226	MSS2
YDL105W	-0.0127915	0.974765	NSE4
YDL102W	0.195321	0.214988	POL3
YDL099W	0.152899	0.403254	BUG1
YDL095W	-0.220953	0.0637463	PMT1
YDL093W	-0.335035	0.071037	PMT5
YDL092W	0.448619	0.00934808	SRP14
YDL089W	0.0778803	0.804829	NUR1
YDL086W	0.0861348	0.674084
YDL085W	0.494382	0.546107	NDE2
YDL084W	0.411359	2.75341e-05	SUB2
YDL082W	0.236121	0.0770902	RPL13A
YDL075W	0.437411	8.53926e-05	RPL31A
YDL073W	-0.651629	0.000614574
YDL070W	0.241942	0.16121	BDF2
YDL066W	-0.312071	0.0124645	IDP1
YDL064W	0.57719	0.00010567	UBC9
YDL060W	-0.17815	0.204108	TSR1
YDL058W	-0.190677	0.249214	USO1
YDL057W	-0.248285	0.461071
YDL056W	-0.354025	0.0555518	MBP1
YDL051W	-0.308717	0.0106231	LHP1
YDL046W	0.403198	0.00119498	NPC2
YDL045W-A	0.386466	0.102257	MRP10
YDL031W	0.10833	0.488865	DBP10
YDL030W	0.101663	0.724552	PRP9
YDL029W	0.0457925	0.803047	ARP2
YDL022W	0.350347	0.0333676	GPD1
YDL021W	0.159459	0.750672	GPM2
YDL017W	-0.434813	0.0584926	CDC7
YDL014W	1.03082	2.34242e-15	NOP1
YDL013W	-0.0381793	0.894826	SLX5
YDL010W	0.210805	0.33323	GRX6
YDL008W	0.38433	0.129921	APC11
YDL007W	0.0205561	0.903873	RPT2
YDL006W	0.534071	0.00490179	PTC1
YDL004W	0.574185	2.42611e-06	ATP16
YDL003W	-0.255563	0.0985839	MCD1
YDL001W	0.105468	0.645468	RMD1
YDR002W	0.537405	1.34066e-05	YRB1
YDR003W-A	-4.20388	0.0273313
YDR004W	-0.651118	0.00920146	RAD57
YDR007W	0.605441	0.129833	TRP1
YDR009W	0.407634	0.354762	GAL3
YDR011W	-0.102318	0.596639	SNQ2
YDR012W	0.316072	0.00710247	RPL4B
YDR013W	-0.528211	0.0197223	PSF1
YDR014W	-0.362911	0.20643	RAD61
YDR014W-A	0.924367	0.480932	HED1
YDR021W	-0.352617	0.228041	FAL1
YDR023W	0.129286	0.270805	SES1
YDR024W	2.08704	0.348478	FYV1
YDR025W	0.213687	0.115659	RPS11A
YDR031W	0.790387	0.00245527	MIC14
YDR033W	0.140561	0.230433	MRH1
YDR034W-B	1.96745	5.33045e-06
YDR035W	0.416319	0.000576871	ARO3
YDR037W	0.132389	0.269657	KRS1
YDR041W	-0.106991	0.583114	RSM10
YDR044W	0.259977	0.172449	HEM13
YDR047W	-0.121141	0.460018	HEM12
YDR049W	-0.0328483	0.891108	VMS1
YDR055W	-0.0262925	0.857432	PST1
YDR057W	-0.265016	0.221234	YOS9
YDR060W	0.0603411	0.674948	MAK21
YDR061W	-0.0738541	0.715429
YDR062W	0.359057	0.0027706	LCB2
YDR063W	0.191971	0.453064	AIM7
YDR064W	0.0714469	0.654039	RPS13
YDR065W	-0.308315	0.361797	RRG1
YDR068W	0.0840943	0.722576	DOS2
YDR073W	-0.793508	0.000171306	SNF11
YDR074W	0.0318159	0.857001	TPS2
YDR075W	0.144316	0.565985	PPH3
YDR076W	0.242698	0.46576	RAD55
YDR077W	0.645443	1.76515e-12	SED1
YDR079W	0.842106	0.000978884	PET100
YDR080W	0.0437821	0.850018	VPS41
YDR082W	-0.782178	0.0279263	STN1
YDR083W	0.500352	0.00109087	RRP8
YDR089W	-0.157646	0.431486
YDR092W	0.490363	0.00259779	UBC13
YDR093W	-0.332034	0.0196578	DNF2
YDR096W	-0.107221	0.593597	GIS1
YDR099W	0.255746	0.0319837	BMH2
YDR100W	0.0695257	0.827139	TVP15
YDR103W	-0.240154	0.182382	STE5
YDR106W	-0.413619	0.617535	ARP10
YDR108W	-0.491952	0.0316567	GSG1
YDR110W	-0.120271	0.598894	FOB1
YDR115W	0.255943	0.268604
YDR118W	-0.385347	0.107294	APC4
YDR119W	-0.0356222	0.821048	VBA4
YDR119W-A	1.63203	0.0179482
YDR121W	0.316485	0.103729	DPB4
YDR122W	0.118042	0.599558	KIN1
YDR124W	-1.02148	0.0351718
YDR126W	-0.617713	0.0955322	SWF1
YDR127W	0.013075	0.934824	ARO1
YDR128W	-0.374205	0.0469298	MTC5
YDR137W	-0.349697	0.0642644	RGP1
YDR138W	-0.260773	0.188934	HPR1
YDR140W	-0.00194495	0.994406	MTQ2
YDR145W	0.416453	0.00207427	TAF12
YDR147W	-1.13995	4.24251e-11	EKI1
YDR150W	-0.597455	4.43119e-07	NUM1
YDR152W	0.198007	0.223383	GIR2
YDR158W	0.126542	0.346657	HOM2
YDR159W	-0.062249	0.806014	SAC3
YDR160W	-1.48837	6.67808e-09	SSY1
YDR161W	0.398986	0.00378913
YDR163W	0.519683	0.0387004	CWC15
YDR165W	-0.31739	0.0155342	TRM82
YDR167W	0.266576	0.125654	TAF10
YDR168W	0.209781	0.115931	CDC37
YDR171W	0.262714	0.617981	HSP42
YDR172W	0.208425	0.0882145	SUP35
YDR174W	-0.794424	9.65155e-13	HMO1
YDR176W	-0.441332	0.025929	NGG1
YDR177W	-0.00795689	0.969726	UBC1
YDR178W	0.71786	3.07968e-07	SDH4
YDR179W-A	-0.215807	0.521782
YDR180W	-0.265407	0.197317	SCC2
YDR182W	-0.271989	0.0784741	CDC1
YDR183W	-0.0456599	0.884908	PLP1
YDR188W	0.0157437	0.918918	CCT6
YDR189W	-0.257241	0.103729	SLY1
YDR191W	-0.523111	0.0504611	HST4
YDR195W	-0.0215473	0.932682	REF2
YDR197W	0.558486	0.0100497	CBS2
YDR201W	0.236225	0.412275	SPC19
YDR204W	-0.0759408	0.782023	COQ4
YDR205W	-0.265381	0.203557	MSC2
YDR206W	-0.313129	0.0502202	EBS1
YDR208W	0.133498	0.464098	MSS4
YDR210W	1.12725	2.65159e-17
YDR211W	-0.159414	0.251248	GCD6
YDR212W	0.110083	0.399028	TCP1
YDR213W	0.331733	0.0867147	UPC2
YDR214W	0.223541	0.107526	AHA1
YDR216W	1.6102	4.80611e-20	ADR1
YDR221W	0.213948	0.232837	GTB1
YDR222W	0.115698	0.676563
YDR223W	-2.39965	0.0159338	CRF1
YDR225W	0.604195	3.69029e-08	HTA1
YDR226W	0.473141	0.000217645	ADK1
YDR227W	-0.356667	0.052949	SIR4
YDR229W	0.158287	0.468809	IVY1
YDR232W	-1.5925e-06	0.999988	HEM1
YDR234W	-0.122856	0.378873	LYS4
YDR235W	-0.530645	0.00708135	PRP42
YDR237W	0.132167	0.516351	MRPL7
YDR241W	2.66313	0.00095564	BUD26
YDR242W	-0.832232	0.00357327	AMD2
YDR244W	0.392074	0.0212489	PEX5
YDR245W	0.146151	0.386065	MNN10
YDR246W	-0.0548522	0.840656	TRS23
YDR247W	-0.114036	0.748454	VHS1
YDR251W	-0.264065	0.0811129	PAM1
YDR252W	1.0043	0.000318423	BTT1
YDR254W	0.07928	0.83118	CHL4
YDR262W	0.164809	0.387541
YDR265W	-0.89611	0.000159953	PEX10
YDR268W	-0.321319	0.148828	MSW1
YDR270W	-0.195684	0.472316	CCC2
YDR272W	0.197876	0.191257	GLO2
YDR273W	-1.44363	0.0455152	DON1
YDR275W	1.09273	1.77341e-05	BSC2
YDR279W	-0.0851262	0.74707	RNH202
YDR280W	0.0759823	0.680416	RRP45
YDR285W	-0.599223	0.172449	ZIP1
YDR287W	-0.012563	0.969159	INM2
YDR288W	-0.00480598	0.989561	NSE3
YDR291W	-0.531266	0.0130038	HRQ1
YDR296W	-0.0567215	0.791549	MHR1
YDR297W	-0.254096	0.0646098	SUR2
YDR299W	0.423898	0.00363995	BFR2
YDR301W	-0.436292	0.0243643	CFT1
YDR302W	-0.00224995	0.994406	GPI11
YDR307W	-0.513179	0.00376047
YDR311W	0.031483	0.892585	TFB1
YDR312W	0.0385866	0.858008	SSF2
YDR316W	-0.0508675	0.852013	OMS1
YDR317W	-0.295827	0.633985	HIM1
YDR318W	-0.69828	0.016107	MCM21
YDR321W	0.174111	0.168322	ASP1
YDR322W	0.32066	0.0478255	MRPL35
YDR325W	-0.180432	0.429528	YCG1
YDR330W	0.261986	0.206405	UBX5
YDR331W	-0.326735	0.0396099	GPI8
YDR332W	-1.87171	4.68078e-14	IRC3
YDR334W	0.0625645	0.81031	SWR1
YDR335W	-0.294013	0.0612759	MSN5
YDR336W	-1.68197	1.34839e-08
YDR337W	0.179454	0.354914	MRPS28
YDR347W	0.00344763	0.988346	MRP1
YDR351W	-0.475566	0.00842933	SBE2
YDR352W	0.399699	0.0168509
YDR353W	0.102228	0.429554	TRR1
YDR354W	-0.219343	0.15232	TRP4
YDR356W	0.582677	0.000377428	SPC110
YDR358W	0.0273914	0.916828	GGA1
YDR363W	0.315492	0.191375	ESC2
YDR363W-A	0.653419	8.19446e-05	SEM1
YDR367W	-0.225754	0.215032	KEI1
YDR368W	0.123767	0.424494	YPR1
YDR371W	-0.478969	0.017554	CTS2
YDR374W-A	0.575408	0.0756298
YDR376W	-0.281065	0.13479	ARH1
YDR377W	0.653493	1.48797e-07	ATP17
YDR379W	-0.395474	0.0351046	RGA2
YDR380W	-0.0686059	0.899206	ARO10
YDR381W	-0.531532	2.82546e-07	YRA1
YDR382W	0.426785	0.000100391	RPP2B
YDR385W	-0.0854968	0.451602	EFT2
YDR386W	-0.12382	0.680556	MUS81
YDR388W	0.431306	0.000635324	RVS167
YDR389W	-0.25449	0.255485	SAC7
YDR392W	-0.356328	0.107473	SPT3
YDR393W	-0.0820725	0.794688	SHE9
YDR394W	0.0372085	0.848131	RPT3
YDR395W	-0.108061	0.401935	SXM1
YDR398W	0.165213	0.255859	UTP5
YDR399W	-0.491185	0.000224367	HPT1
YDR401W	1.34304	0.20529
YDR403W	-0.828917	0.0537764	DIT1
YDR405W	0.265405	0.155236	MRP20
YDR406W	-0.0818584	0.787762	PDR15
YDR409W	-0.413977	0.0497129	SIZ1
YDR412W	0.630568	6.2509e-05	RRP17
YDR416W	-0.0446219	0.857001	SYF1
YDR418W	0.266773	0.0336262	RPL12B
YDR419W	-0.177058	0.503449	RAD30
YDR420W	-0.337288	0.0532441	HKR1
YDR421W	-1.21379	1.61708e-08	ARO80
YDR425W	-0.0990249	0.73021	SNX41
YDR427W	0.114151	0.405189	RPN9
YDR434W	-0.255573	0.0837203	GPI17
YDR436W	0.224102	0.302331	PPZ2
YDR438W	-0.97102	0.2419	THI74
YDR439W	-0.560203	0.0259457	LRS4
YDR440W	0.0127033	0.966296	DOT1
YDR444W	-0.624828	0.00357327
YDR448W	0.0170469	0.947404	ADA2
YDR450W	0.223897	0.150736	RPS18A
YDR452W	-0.194651	0.20011	PPN1
YDR456W	-0.30379	0.0404637	NHX1
YDR457W	0.122704	0.492434	TOM1
YDR460W	0.66705	0.000782851	TFB3
YDR461W	-1.51975	0.250445	MFA1
YDR462W	0.585027	0.00115572	MRPL28
YDR463W	0.225729	0.132115	STP1
YDR464W	0.121776	0.556228	SPP41
YDR466W	-0.677597	7.41949e-05	PKH3
YDR469W	0.300841	0.284139	SDC1
YDR471W	0.25593	0.0275672	RPL27B
YDR472W	-0.196274	0.360165	TRS31
YDR477W	0.199748	0.204807	SNF1
YDR478W	0.12608	0.724719	SNM1
YDR483W	-0.549868	2.23475e-06	KRE2
YDR484W	-0.176299	0.423022	VPS52
YDR489W	0.262685	0.298032	SLD5
YDR492W	-0.493952	0.000822088	IZH1
YDR493W	0.638113	0.0054053	MZM1
YDR494W	0.401038	0.0118018	RSM28
YDR499W	-0.658463	0.00617893	LCD1
YDR501W	0.0117286	0.979776	PLM2
YDR510W	0.671598	1.47004e-06	SMT3
YDR511W	0.635681	0.000616348	ACN9
YDR513W	0.32409	0.0267656	GRX2
YDR515W	0.0313156	0.909529	SLF1
YDR517W	-0.446068	0.00829755	GRH1
YDR518W	-0.297454	0.0987761	EUG1
YDR519W	0.397092	0.00965251	FPR2
YDR525W-A	0.505743	0.00189757	SNA2
YDR527W	-0.399671	0.0466149	RBA50
YDR528W	-0.3192	0.250807	HLR1
YDR531W	0.0985618	0.655906	CAB1
YDR536W	0.268147	0.883685	STL1
YDR538W	-0.348692	0.0889837	PAD1
YDR539W	0.041171	0.820286	FDC1
YEL073C	1.07831	0.00412688
YEL068C	-0.264241	0.529906
YEL064C	-0.00289324	0.994406	AVT2
YEL063C	-0.698835	0.00273108	CAN1
YEL061C	-0.214944	0.323717	CIN8
YEL060C	0.348531	0.00447461	PRB1
YEL059C-A	0.0178626	0.972231	SOM1
YEL057C	-0.882009	0.345742
YEL055C	-0.215576	0.0906755	POL5
YEL054C	0.549433	5.86727e-07	RPL12A
YEL053C	-0.391035	0.0248991	MAK10
YEL050C	0.51572	0.000263876	RML2
YEL048C	0.915064	2.77963e-05	TCA17
YEL047C	0.08902	0.619493
YEL046C	0.226342	0.0546675	GLY1
YEL039C	0.0439471	0.894826	CYC7
YEL037C	0.334328	0.00692143	RAD23
YEL036C	-0.37441	0.00829755	ANP1
YEL029C	-0.0805981	0.773	BUD16
YEL025C	-0.983145	0.011884
YEL023C	-1.59404	0.00577098
YEL017C-A	2.29287	5.72114e-45	PMP2
YEL016C	-0.794827	0.00414937	NPP2
YEL009C-A	-2.98988	0.0622609
YEL009C	-0.424588	0.0020514	GCN4
YEL008C-A	2.00274	0.295105
YEL005C	-0.667047	0.0464309	VAB2
YEL002C	-0.09481	0.533102	WBP1
YEL001C	0.197046	0.149241	IRC22
YER003C	0.0583854	0.71472	PMI40
YER007C-A	0.258492	0.0857547	TMA20
YER008C	-0.213751	0.224151	SEC3
YER010C	-0.0230397	0.947088
YER017C	5.86573e-05	0.999917	AFG3
YER018C	-0.194962	0.454611	SPC25
YER019C-A	0.375211	0.0721872	SBH2
YER026C	0.13032	0.349253	CHO1
YER027C	0.405233	0.00530978	GAL83
YER028C	-2.55591	1.30316e-10	MIG3
YER029C	0.362422	0.0937423	SMB1
YER031C	0.235439	0.0895014	YPT31
YER033C	-0.606074	0.00878168	ZRG8
YER036C	-0.114148	0.346603	ARB1
YER038C	0.00764639	0.988014	KRE29
YER039C	-3.9423	0.0457009	HVG1
YER043C	0.154318	0.137332	SAH1
YER044C	-0.292732	0.129065	ERG28
YER044C-A	-0.814353	0.494844	MEI4
YER045C	0.0956229	0.722576	ACA1
YER047C	0.161581	0.480932	SAP1
YER048C	0.326725	0.012448	CAJ1
YER050C	0.547915	0.00257315	RSM18
YER052C	-0.0345657	0.81073	HOM3
YER053C	0.561674	0.00374977	PIC2
YER053C-A	1.18089	1.36558e-12
YER054C	0.582985	0.179278	GIP2
YER055C	0.220918	0.0783294	HIS1
YER056C	-0.229262	0.0570004	FCY2
YER056C-A	0.171615	0.241636	RPL34A
YER057C	0.271582	0.0457758	HMF1
YER061C	-0.506601	0.0319206	CEM1
YER062C	0.430519	0.00275797	HOR2
YER064C	-0.0116638	0.95337
YER065C	-0.441664	0.310461	ICL1
YER071C	0.692406	0.00367691
YER075C	-0.623702	0.00303366	PTP3
YER076C	-0.814906	0.00686719
YER077C	-0.00450558	0.985073
YER078C	-0.11758	0.609137	ICP55
YER082C	-0.106546	0.568626	UTP7
YER083C	-0.0606459	0.749537	GET2
YER087C-B	0.758549	5.72581e-09	SBH1
YER088C	-0.706828	1.72261e-07	DOT6
YER088C-A	-0.820497	0.0116448
YER089C	0.156107	0.245418	PTC2
YER091C	-0.141969	0.441404	MET6
YER093C	-0.596259	0.00115656	TSC11
YER093C-A	0.214277	0.578922	AIM11
YER094C	0.267912	0.025266	PUP3
YER099C	0.0917048	0.582863	PRS2
YER101C	-0.16345	0.501736	AST2
YER105C	-0.111264	0.449536	NUP157
YER107C	0.0087905	0.969159	GLE2
YER109C	-0.136072	0.688577	FLO8
YER110C	-0.522887	1.54604e-07	KAP123
YER111C	-0.309419	0.0984804	SWI4
YER113C	-0.514248	0.00733359	TMN3
YER114C	-0.0335533	0.875158	BOI2
YER115C	-0.798985	0.0320548	SPR6
YER116C	0.61823	0.00978302	SLX8
YER118C	0.25671	0.088127	SHO1
YER119C	0.147413	0.523982	AVT6
YER122C	0.089694	0.528313	GLO3
YER124C	0.176028	0.181333	DSE1
YER126C	0.280802	0.065708	NSA2
YER130C	-0.123715	0.599558
YER132C	-0.754275	0.000146255	PMD1
YER134C	0.352435	0.0489175
YER137C	0.985052	0.00476362
YER139C	0.806867	0.00158003	RTR1
YER142C	-0.216027	0.561719	MAG1
YER144C	-0.146822	0.526945	UBP5
YER145C	-0.366071	0.0270641	FTR1
YER147C	-0.432995	0.0680497	SCC4
YER149C	-0.0161137	0.958838	PEA2
YER151C	-0.185602	0.162135	UBP3
YER152C	-0.0361873	0.887064
YER155C	0.0312552	0.858171	BEM2
YER156C	0.106752	0.466906
YER158C	-1.36156	6.37098e-06
YER159C	0.244477	0.220937	BUR6
YER161C	1.02592	1.55868e-08	SPT2
YER162C	0.127866	0.680416	RAD4
YER163C	-0.0973949	0.752161
YER168C	-0.314249	0.0299377	CCA1
YER172C	0.443716	0.00201862	BRR2
YER174C	-0.0118901	0.968991	GRX4
YER175C	0.529615	0.00611486	TMT1
YER180C	-2.61872	0.205084	ISC10
YER180C-A	1.10543	0.00174252	SLO1
YER183C	-0.0434854	0.880245	FAU1
YER184C	-1.40101	6.18449e-07
YER186C	0.804667	0.0411705
YER188C-A	-4.08142	0.0566979
YEL072W	-0.83753	0.0189925	RMD6
YEL071W	-0.163642	0.272742	DLD3
YEL070W	0.532604	0.479776	DSF1
YEL066W	-0.0266566	0.927881	HPA3
YEL065W	-0.356487	0.560275	SIT1
YEL062W	-0.506234	0.0293918	NPR2
YEL058W	-0.174041	0.16597	PCM1
YEL056W	-0.119773	0.579883	HAT2
YEL052W	-0.417481	0.00943678	AFG1
YEL051W	0.354576	0.00645352	VMA8
YEL049W	-1.13027	0.110812	PAU2
YEL044W	-0.310717	0.125455	IES6
YEL043W	-0.475469	0.00549585
YEL042W	-0.106458	0.460264	GDA1
YEL041W	-0.791507	0.0163086	YEF1
YEL040W	-0.289755	0.00768581	UTR2
YEL038W	0.0061799	0.982374	UTR4
YEL034W	0.253129	0.017554	HYP2
YEL033W	0.641897	0.195416	MTC7
YEL032W	-0.126625	0.43889	MCM3
YEL031W	-0.252616	0.0502041	SPF1
YEL030W	-1.11035	0.000246249	ECM10
YEL028W	0.530096	0.563672
YEL027W	0.728052	2.21982e-09	VMA3
YEL026W	0.651477	3.57848e-09	SNU13
YEL024W	0.613378	2.66981e-06	RIP1
YEL022W	0.0316507	0.870714	GEA2
YEL021W	0.144301	0.46279	URA3
YEL020W-A	0.26725	0.144519	TIM9
YEL018W	-0.342469	0.178231	EAF5
YEL017W	-0.113586	0.637591	GTT3
YEL015W	0.181172	0.213424	EDC3
YEL013W	0.353782	0.00458101	VAC8
YEL012W	0.461014	0.0537764	UBC8
YEL011W	0.197365	0.310632	GLC3
YEL008W	3.8734	0.101168
YEL007W	-0.113536	0.503498
YEL006W	-0.206434	0.38076	YEA6
YEL004W	-0.594207	0.0464659	YEA4
YEL003W	0.3016	0.119708	GIM4
YER001W	-0.261881	0.0321228	MNN1
YER002W	0.500737	0.000519573	NOP16
YER004W	0.307409	0.0353288	FMP52
YER005W	-0.559291	0.00328879	YND1
YER006W	0.183377	0.192322	NUG1
YER007W	-0.526132	0.108397	PAC2
YER009W	0.333754	0.0162373	NTF2
YER011W	-0.015559	0.975303	TIR1
YER012W	0.413917	0.00102504	PRE1
YER013W	0.209051	0.312918	PRP22
YER014W	-0.238939	0.22652	HEM14
YER015W	-0.860663	0.000365625	FAA2
YER016W	0.0387997	0.864834	BIM1
YER019W	-0.231388	0.172449	ISC1
YER020W	-0.0718311	0.770527	GPA2
YER021W	-0.141017	0.330036	RPN3
YER022W	0.116943	0.576063	SRB4
YER023W	0.0626959	0.653783	PRO3
YER024W	-0.0455544	0.919633	YAT2
YER025W	0.39948	0.000446884	GCD11
YER030W	0.907593	1.61085e-07	CHZ1
YER032W	0.0710558	0.764036	FIR1
YER034W	0.152459	0.598083
YER035W	0.833128	2.75432e-05	EDC2
YER037W	0.0613402	0.793032	PHM8
YER038W-A	1.55789	0.161063
YER040W	-0.385898	0.0490156	GLN3
YER041W	-1.44771	8.65775e-08	YEN1
YER042W	0.341443	0.0135684	MXR1
YER046W	1.24952	0.000109819	SPO73
YER048W-A	1.04739	2.64004e-11	ISD11
YER049W	-0.270284	0.0185519	TPA1
YER051W	0.0662698	0.856579	JHD1
YER058W	0.826205	0.0107738	PET117
YER059W	0.140359	0.543575	PCL6
YER060W	-0.756931	0.00334317	FCY21
YER060W-A	-0.737878	5.19076e-07	FCY22
YER063W	0.34361	0.0220791	THO1
YER066W	-1.66698	2.68653e-06	RRT13
YER067W	0.589295	0.155965	RGI1
YER068W	-0.337523	0.0186221	MOT2
YER069W	-0.283775	0.0248991	ARG5,6
YER070W	-0.28566	0.010649	RNR1
YER072W	0.506424	6.25053e-06	VTC1
YER073W	0.114531	0.365552	ALD5
YER074W	0.34567	0.00148889	RPS24A
YER074W-A	-0.0151313	0.961345	YOS1
YER076W-A	0.458027	0.716988
YER079W	0.412843	0.169677
YER080W	-0.0143157	0.944463	AIM9
YER081W	-0.4462	0.00174146	SER3
YER084W	0.349142	0.790522
YER086W	-0.0905477	0.492434	ILV1
YER087W	-0.229735	0.30841	AIM10
YER088W-B	2.00579	0.52251
YER090W	0.326353	0.00870994	TRP2
YER092W	0.630234	0.000978884	IES5
YER095W	0.638873	8.82287e-06	RAD51
YER096W	-0.303562	0.534739	SHC1
YER098W	-0.350933	0.283076	UBP9
YER100W	0.526544	0.000441514	UBC6
YER102W	0.236231	0.0411705	RPS8B
YER103W	0.761436	0.0534311	SSA4
YER104W	1.10828	2.41351e-06	RTT105
YER106W	-1.1954	0.442588	MAM1
YER112W	0.211229	0.215665	LSM4
YER117W	0.31892	0.0169268	RPL23B
YER120W	0.480851	5.12487e-05	SCS2
YER121W	-0.101943	0.927256
YER123W	0.386932	0.0260191	YCK3
YER125W	0.430062	0.000311354	RSP5
YER127W	0.155543	0.412808	LCP5
YER128W	0.299816	0.35588
YER129W	-0.773062	0.000350226	SAK1
YER131W	0.520532	9.91117e-07	RPS26B
YER133W	0.360314	0.00150776	GLC7
YER136W	0.151389	0.267002	GDI1
YER138W-A	-2.78637	2.93639e-13
YER140W	-0.508095	0.0406065
YER141W	0.321316	0.022777	COX15
YER143W	0.334078	0.0324759	DDI1
YER146W	0.397067	0.0317226	LSM5
YER148W	0.139189	0.369262	SPT15
YER150W	1.98733	3.30309e-09	SPI1
YER154W	-0.13353	0.452427	OXA1
YER157W	-0.295372	0.0831989	COG3
YER164W	-0.256797	0.087882	CHD1
YER165W	0.474176	7.67323e-06	PAB1
YER166W	0.0609955	0.750672	DNF1
YER167W	0.319925	0.097246	BCK2
YER169W	-0.0969907	0.705391	RPH1
YER170W	0.715241	0.00304826	ADK2
YER171W	-0.208703	0.208336	RAD3
YER173W	-0.489168	0.0583761	RAD24
YER175W-A	2.79722	0.0682636
YER176W	0.0345346	0.884547	ECM32
YER177W	0.056911	0.752582	BMH1
YER178W	0.254913	0.0622662	PDA1
YER179W	-0.187097	0.807435	DMC1
YER182W	0.0771676	0.76886	FMP10
YER187W	0.839164	0.515518
YER188W	-0.285313	0.724552
YFL057C	-1.30698	0.00578437	AAD16
YFL054C	0.320694	0.291874
YFL050C	-1.81252	2.70675e-07	ALR2
YFL048C	-0.124953	0.376592	EMP47
YFL045C	-0.0776638	0.570589	SEC53
YFL044C	0.157939	0.39254	OTU1
YFL042C	-0.184565	0.421116
YFL039C	0.298462	0.00357327	ACT1
YFL038C	0.248661	0.0612759	YPT1
YFL034C-B	-0.0526401	0.826271	MOB2
YFL034C-A	-1.50479	1.01271e-22	RPL22B
YFL033C	-0.0552556	0.796452	RIM15
YFL029C	0.0132273	0.971374	CAK1
YFL028C	-0.167149	0.371169	CAF16
YFL027C	0.153563	0.570619	GYP8
YFL025C	0.0951571	0.684932	BST1
YFL024C	-0.427665	0.0555779	EPL1
YFL022C	-0.0505696	0.724552	FRS2
YFL021C-A	-4.04221	0.135752
YFL020C	-1.27603	0.185629	PAU5
YFL018C	0.274769	0.0201398	LPD1
YFL017C	-0.109367	0.61283	GNA1
YFL016C	0.139775	0.399028	MDJ1
YFL013C	0.169906	0.354356	IES1
YFL010C	0.773742	8.68269e-10	WWM1
YFL003C	-0.000407107	0.999917	MSH4
YFL002C	-0.196045	0.241696	SPB4
YFR003C	0.302631	0.125307	YPI1
YFR005C	-0.971902	3.57848e-09	SAD1
YFR011C	0.362474	0.0479249	AIM13
YFR014C	-0.150499	0.475314	CMK1
YFR015C	0.349317	0.437702	GSY1
YFR016C	0.244359	0.120148
YFR017C	1.05617	0.000760736
YFR018C	-0.38148	0.0355265
YFR024C-A	0.0799042	0.647357	LSB3
YFR025C	0.0321943	0.908464	HIS2
YFR026C	0.0342876	0.972231	ULI1
YFR028C	-0.568052	0.000170282	CDC14
YFR031C	-0.442826	0.0402086	SMC2
YFR031C-A	0.308422	0.0174206	RPL2A
YFR032C-A	0.498127	0.000118082	RPL29
YFR033C	0.878052	1.01581e-10	QCR6
YFR034C	-0.22603	0.282596	PHO4
YFR037C	0.116363	0.413387	RSC8
YFR039C	-0.264391	0.169633
YFR041C	-0.298061	0.0864606	ERJ5
YFR043C	0.231937	0.457471	IRC6
YFR044C	0.203282	0.128601	DUG1
YFR046C	-0.6019	0.0321228	CNN1
YFR047C	0.0957519	0.61889	BNA6
YFR050C	0.198269	0.169722	PRE4
YFR051C	-0.224298	0.0869717	RET2
YFR053C	0.206831	0.688577	HXK1
YFL055W	-0.732801	0.0738655	AGP3
YFL053W	-0.0179146	0.991174	DAK2
YFL052W	0.349944	0.457273
YFL049W	-0.980698	2.96603e-09	SWP82
YFL047W	-0.313191	0.056681	RGD2
YFL046W	0.244221	0.30981	FMP32
YFL041W-A	-2.83666	0.199564
YFL041W	-0.04136	0.838102	FET5
YFL037W	0.159749	0.165817	TUB2
YFL036W	-0.0754152	0.626189	RPO41
YFL034W	-0.0520901	0.832394
YFL031W	0.702743	3.03699e-07	HAC1
YFL030W	0.701427	0.0786709	AGX1
YFL026W	-10.1395	1.26978e-10	STE2
YFL023W	0.492913	0.00554733	BUD27
YFL021W	-0.0582166	0.794356	GAT1
YFL017W-A	0.241672	0.387827	SMX2
YFL014W	0.76926	1.78961e-05	HSP12
YFL011W	-0.507591	0.728455	HXT10
YFL009W	-0.239787	0.151021	CDC4
YFL008W	0.117611	0.514177	SMC1
YFL007W	-0.035961	0.838102	BLM10
YFL005W	0.594314	2.78391e-06	SEC4
YFL004W	0.0982666	0.477623	VTC2
YFL001W	-0.366072	0.109422	DEG1
YFR001W	0.406555	0.0104314	LOC1
YFR002W	-0.121957	0.401935	NIC96
YFR004W	0.339097	0.00901229	RPN11
YFR006W	0.0215104	0.90466
YFR007W	-0.156212	0.56074	YFH7
YFR008W	0.658836	0.0150555	FAR7
YFR009W	0.112996	0.392938	GCN20
YFR010W	0.0410411	0.79819	UBP6
YFR013W	-0.207255	0.235813	IOC3
YFR019W	-0.285527	0.0893337	FAB1
YFR020W	-1.86985	8.48208e-06
YFR021W	-0.246122	0.280828	ATG18
YFR022W	-0.250644	0.477623	ROG3
YFR023W	-1.02475	0.484171	PES4
YFR027W	0.291365	0.395936	ECO1
YFR029W	-0.167331	0.58205	PTR3
YFR030W	-0.716506	2.06142e-10	MET10
YFR034W-A	0.052123	0.939027
YFR038W	-0.233215	0.238297	IRC5
YFR040W	-0.691943	2.2006e-06	SAP155
YFR042W	-0.510784	0.032694	KEG1
YFR045W	-0.133318	0.672319
YFR048W	-0.0147291	0.960108	RMD8
YFR049W	0.76435	1.66791e-05	YMR31
YFR052W	0.0101532	0.960108	RPN12
YFR055W	0.161164	0.399012	IRC7
YGL257C	-0.730418	0.000362943	MNT2
YGL252C	0.073126	0.688577	RTG2
YGL251C	-0.50188	0.0967817	HFM1
YGL246C	-0.0936651	0.696285	RAI1
YGL242C	0.798756	2.58768e-08
YGL237C	0.423578	0.0669211	HAP2
YGL236C	0.203854	0.442936	MTO1
YGL231C	0.00814733	0.977961	EMC4
YGL230C	0.545851	0.661721
YGL229C	-0.320894	0.346988	SAP4
YGL226C-A	0.574784	0.161917	OST5
YGL224C	-0.105065	0.649645	SDT1
YGL223C	-1.06363	8.68269e-10	COG1
YGL222C	0.64525	5.12487e-05	EDC1
YGL221C	0.080624	0.699951	NIF3
YGL219C	0.0970503	0.623738	MDM34
YGL213C	0.203862	0.225015	SKI8
YGL206C	0.195855	0.0684587	CHC1
YGL204C	2.70478	5.35871e-19
YGL203C	-0.414754	0.00362665	KEX1
YGL201C	0.00673572	0.974123	MCM6
YGL200C	-0.039932	0.835529	EMP24
YGL199C	-4.4378	0.0628711
YGL194C-A	-0.204144	0.649645
YGL194C	-0.11845	0.596505	HOS2
YGL193C	-0.583841	0.862207
YGL190C	0.249749	0.134657	CDC55
YGL189C	-0.151767	0.290259	RPS26A
YGL187C	0.641457	9.78811e-10	COX4
YGL186C	-0.215119	0.17461	TPN1
YGL185C	-0.235299	0.377271
YGL184C	-0.178727	0.480932	STR3
YGL179C	-0.695137	0.0511301	TOS3
YGL176C	-0.563113	0.0951029
YGL175C	-0.771664	0.0907071	SAE2
YGL173C	0.270734	0.0141317	KEM1
YGL167C	-0.193793	0.141296	PMR1
YGL165C	0.577607	0.883982
YGL164C	-0.0259342	0.936303	YRB30
YGL163C	-0.159669	0.441254	RAD54
YGL161C	0.190818	0.241628	YIP5
YGL154C	-1.23356	0.000857541	LYS5
YGL150C	0.102366	0.5157	INO80
YGL147C	0.0103836	0.956817	RPL9A
YGL146C	-0.771044	0.283076	RRT6
YGL144C	-0.331666	0.34278	ROG1
YGL143C	-0.0254159	0.936303	MRF1
YGL142C	-0.503683	0.00345914	GPI10
YGL140C	-0.273924	0.0532367
YGL136C	-0.449054	0.245979	MRM2
YGL131C	-0.173695	0.467435	SNT2
YGL129C	-0.0163345	0.949359	RSM23
YGL128C	-0.611019	0.0439985	CWC23
YGL127C	-0.0234893	0.954219	SOH1
YGL124C	0.283923	0.233074	MON1
YGL122C	0.24971	0.0507264	NAB2
YGL121C	0.662997	0.137961	GPG1
YGL120C	0.0423935	0.790213	PRP43
YGL112C	0.0149684	0.952775	TAF6
YGL110C	-0.103699	0.700656	CUE3
YGL108C	0.747952	0.00561862
YGL107C	0.0270669	0.896545	RMD9
YGL104C	-0.601598	0.0401278	VPS73
YGL095C	-0.137383	0.516085	VPS45
YGL094C	-0.235572	0.203061	PAN2
YGL091C	0.0335536	0.893512	NBP35
YGL089C	0.655145	0.447243	MF(ALPHA)2
YGL087C	0.526878	0.00416554	MMS2
YGL084C	-0.351632	0.03792	GUP1
YGL078C	0.193897	0.137231	DBP3
YGL077C	0.112712	0.522944	HNM1
YGL076C	0.118903	0.403264	RPL7A
YGL075C	0.450665	0.161373	MPS2
YGL072C	-0.0845508	0.956817
YGL070C	0.701139	4.53812e-06	RPB9
YGL065C	-0.134876	0.447243	ALG2
YGL064C	0.175841	0.421472	MRH4
YGL061C	0.23085	0.364233	DUO1
YGL057C	0.213215	0.424476	GEP7
YGL056C	-0.338064	0.0119436	SDS23
YGL054C	0.334382	0.0157202	ERV14
YGL049C	0.164956	0.221234	TIF4632
YGL048C	0.381833	0.00050542	RPT6
YGL044C	0.624051	0.000434922	RNA15
YGL040C	0.298679	0.0532441	HEM2
YGL038C	-0.0709349	0.72517	OCH1
YGL037C	0.473663	0.00335427	PNC1
YGL035C	-0.162391	0.362963	MIG1
YGL032C	-1.64752	0.222172	AGA2
YGL031C	0.387925	0.000360173	RPL24A
YGL028C	-0.14636	0.309595	SCW11
YGL027C	-0.372335	0.00267597	CWH41
YGL026C	0.219171	0.0692772	TRP5
YGL025C	-0.267958	0.228381	PGD1
YGL023C	-0.0737937	0.747905	PIB2
YGL020C	-0.158797	0.374099	GET1
YGL018C	0.297754	0.259277	JAC1
YGL013C	-0.395255	0.00915736	PDR1
YGL011C	0.253642	0.0441818	SCL1
YGL009C	0.230807	0.55056	LEU1
YGL008C	0.260143	0.0641059	PMA1
YGL007C-A	-0.0647929	0.982374
YGL005C	-0.207324	0.439954	COG7
YGL004C	-0.355593	0.143884	RPN14
YGL003C	-0.53052	0.0189925	CDH1
YGL001C	0.022165	0.908283	ERG26
YGR001C	0.0254293	0.894826
YGR002C	0.0888212	0.697671	SWC4
YGR005C	0.440094	0.00466047	TFG2
YGR008C	1.21437	4.78077e-13	STF2
YGR009C	0.302494	0.0441501	SEC9
YGR015C	-0.560344	0.0748997
YGR020C	0.757536	1.19002e-07	VMA7
YGR024C	-0.822662	2.55496e-05	THG1
YGR027C	0.286589	0.0388204	RPS25A
YGR030C	0.226618	0.375279	POP6
YGR033C	0.314857	0.0622609	TIM21
YGR035C	0.431231	0.234199
YGR036C	0.673542	0.00148889	CAX4
YGR037C	0.599348	1.34589e-07	ACB1
YGR043C	0.379158	0.457193	NQM1
YGR044C	0.42673	0.0111818	RME1
YGR045C	-0.937088	0.49313
YGR047C	-0.419726	0.0187713	TFC4
YGR050C	-0.758221	0.445543
YGR053C	-0.488546	0.539879
YGR057C	0.024463	0.949359	LST7
YGR061C	-0.0841358	0.494213	ADE6
YGR062C	-0.0195452	0.96457	COX18
YGR063C	0.140407	0.483413	SPT4
YGR065C	-0.510979	0.00611486	VHT1
YGR067C	-0.301435	0.620964
YGR068C	-0.10603	0.675205	ART5
YGR071C	-0.303074	0.168322
YGR073C	-0.578755	0.868543
YGR075C	-0.195133	0.560983	PRP38
YGR076C	0.224028	0.346305	MRPL25
YGR077C	-0.508487	0.00829755	PEX8
YGR078C	0.253666	0.111744	PAC10
YGR081C	-0.0208104	0.936303	SLX9
YGR083C	0.0776617	0.592188	GCD2
YGR084C	-0.124314	0.587885	MRP13
YGR085C	0.127534	0.392633	RPL11B
YGR086C	0.165306	0.195849	PIL1
YGR087C	-1.1326	0.0495587	PDC6
YGR095C	0.19669	0.314915	RRP46
YGR098C	-0.439761	0.0392699	ESP1
YGR102C	0.174121	0.525355
YGR104C	-0.183601	0.508747	SRB5
YGR106C	0.0262919	0.892259	VOA1
YGR109C	-0.111268	0.742106	CLB6
YGR117C	-0.62823	0.0037514
YGR119C	0.253105	0.124424	NUP57
YGR120C	-0.160032	0.530632	COG2
YGR121C	-0.416703	0.0784741	MEP1
YGR122C-A	-0.380133	0.628265
YGR123C	0.207955	0.137513	PPT1
YGR128C	-0.239954	0.145079	UTP8
YGR130C	0.195721	0.20499
YGR132C	0.416737	0.00896683	PHB1
YGR138C	-0.303224	0.130103	TPO2
YGR146C	0.4177	0.0573072	ECL1
YGR146C-A	2.00261	0.431052
YGR147C	0.347001	0.0851121	NAT2
YGR148C	0.251729	0.0242624	RPL24B
YGR150C	-0.0413335	0.877071	CCM1
YGR154C	-1.40266	0.000299382	GTO1
YGR158C	0.474398	0.00347654	MTR3
YGR159C	0.146579	0.35993	NSR1
YGR161C	0.120076	0.484892	RTS3
YGR168C	-1.4092	4.59376e-08
YGR169C	-0.19968	0.543659	PUS6
YGR169C-A	1.74455	4.50583e-24
YGR171C	-0.538868	0.0218787	MSM1
YGR172C	0.155626	0.403655	YIP1
YGR174C	0.227288	0.399432	CBP4
YGR175C	0.0551291	0.708708	ERG1
YGR177C	-0.136886	0.483929	ATF2
YGR178C	0.392192	0.00110762	PBP1
YGR179C	0.0396395	0.910088	OKP1
YGR180C	0.0552168	0.745428	RNR4
YGR182C	-2.46368	0.296715
YGR183C	1.54379	7.00118e-19	QCR9
YGR184C	-0.154379	0.296633	UBR1
YGR185C	0.0409405	0.789907	TYS1
YGR187C	0.0438143	0.809644	HGH1
YGR188C	-1.18388	2.77963e-05	BUB1
YGR189C	0.0420081	0.764941	CRH1
YGR192C	0.00643294	0.978386	TDH3
YGR193C	0.292639	0.0300435	PDX1
YGR194C	-0.18616	0.467523	XKS1
YGR196C	0.147317	0.481109	FYV8
YGR197C	-0.0615823	0.844728	SNG1
YGR200C	0.117335	0.464286	ELP2
YGR201C	1.16831	7.74555e-05
YGR202C	-0.707089	1.42037e-06	PCT1
YGR207C	0.397477	0.0130806
YGR209C	0.583396	2.7577e-06	TRX2
YGR210C	-0.48548	0.000502399
YGR213C	0.342443	0.477203	RTA1
YGR216C	-0.392575	0.0929201	GPI1
YGR220C	0.100024	0.583599	MRPL9
YGR221C	-0.0570799	0.907353	TOS2
YGR223C	-0.456243	0.0641059	HSV2
YGR229C	0.0267826	0.901415	SMI1
YGR231C	0.252947	0.045493	PHB2
YGR233C	-0.377705	0.0042131	PHO81
YGR235C	0.109071	0.604232
YGR236C	2.93539	0.104574	SPG1
YGR237C	-0.159703	0.473061
YGR238C	-0.583401	0.0158103	KEL2
YGR239C	0.181452	0.449536	PEX21
YGR240C	0.355299	0.00175533	PFK1
YGR241C	-0.134678	0.434089	YAP1802
YGR244C	0.302656	0.0180276	LSC2
YGR245C	0.192628	0.162135	SDA1
YGR246C	-0.00775127	0.979007	BRF1
YGR250C	0.343252	0.0336664
YGR253C	-0.0251004	0.881469	PUP2
YGR255C	-0.0884669	0.677316	COQ6
YGR257C	-0.466734	0.0362088	MTM1
YGR258C	-0.323601	0.127761	RAD2
YGR259C	-2.83785	0.315717
YGR261C	0.133861	0.396625	APL6
YGR262C	0.0700685	0.783533	BUD32
YGR263C	-0.748168	0.00640322	SAY1
YGR264C	-0.315872	0.00374221	MES1
YGR267C	0.165854	0.261277	FOL2
YGR268C	0.811747	0.000145622	HUA1
YGR271C-A	0.104665	0.625878	EFG1
YGR274C	-0.502392	0.00528658	TAF1
YGR276C	-0.132249	0.492336	RNH70
YGR277C	-0.0452151	0.873695	CAB4
YGR279C	-0.0140503	0.930127	SCW4
YGR280C	0.861117	5.18761e-07	PXR1
YGR282C	0.206943	0.0825931	BGL2
YGR283C	-0.189182	0.4204
YGR284C	0.235439	0.0810377	ERV29
YGR285C	0.28359	0.029364	ZUO1
YGR286C	-0.0059256	0.985073	BIO2
YGR287C	-0.299059	0.375489	IMA1
YGR289C	-1.12999	0.0321559	MAL11
YGL258W	1.89562	0.359235	VEL1
YGL256W	-1.72954	9.81255e-19	ADH4
YGL255W	-0.882898	1.38392e-06	ZRT1
YGL254W	0.055411	0.857001	FZF1
YGL253W	0.259487	0.0108392	HXK2
YGL250W	0.0760573	0.858008	RMR1
YGL248W	-0.335246	0.112097	PDE1
YGL247W	-0.774725	0.00724068	BRR6
YGL245W	0.22861	0.0352889	GUS1
YGL244W	0.453514	0.000213002	RTF1
YGL243W	-0.552498	0.0287505	TAD1
YGL241W	-0.190072	0.245168	KAP114
YGL240W	0.491073	0.234199	DOC1
YGL238W	-0.064791	0.650401	CSE1
YGL234W	0.214991	0.144519	ADE5,7
YGL233W	-0.205797	0.204252	SEC15
YGL232W	0.270412	0.118192	TAN1
YGL228W	-0.3482	0.00549351	SHE10
YGL227W	-0.0388322	0.875158	VID30
YGL226W	0.255661	0.484171	MTC3
YGL225W	-0.211811	0.106866	VRG4
YGL220W	0.273782	0.130323	FRA2
YGL216W	-0.130497	0.53022	KIP3
YGL215W	0.1589	0.396625	CLG1
YGL212W	0.0932681	0.767921	VAM7
YGL211W	-0.251904	0.178423	NCS6
YGL210W	-0.216056	0.308584	YPT32
YGL209W	0.075945	0.810963	MIG2
YGL208W	0.2245	0.3806	SIP2
YGL207W	0.0311056	0.855192	SPT16
YGL205W	0.69236	0.461783	POX1
YGL202W	0.134616	0.346244	ARO8
YGL198W	0.0124658	0.960163	YIP4
YGL197W	-0.232073	0.169499	MDS3
YGL196W	0.0163216	0.951047	DSD1
YGL195W	0.0670785	0.607195	GCN1
YGL191W	0.598211	9.94897e-08	COX13
YGL181W	0.296438	0.0412367	GTS1
YGL180W	0.377648	0.119168	ATG1
YGL178W	-0.130322	0.490636	MPT5
YGL174W	0.290954	0.326608	BUD13
YGL172W	-0.0673772	0.712883	NUP49
YGL171W	0.256013	0.110693	ROK1
YGL169W	0.147654	0.460151	SUA5
YGL166W	0.521099	0.0342644	CUP2
YGL162W	-0.332179	0.240323	SUT1
YGL160W	-0.28457	0.115814	AIM14
YGL159W	-0.521654	0.0185519
YGL158W	-0.759996	0.55729	RCK1
YGL157W	0.00244432	0.990873	ARI1
YGL156W	0.227185	0.31473	AMS1
YGL155W	-0.0741306	0.752786	CDC43
YGL153W	-0.0347002	0.899856	PEX14
YGL151W	-0.205336	0.27308	NUT1
YGL148W	0.236729	0.0938626	ARO2
YGL145W	-0.186448	0.349517	TIP20
YGL141W	-0.294076	0.123261	HUL5
YGL139W	-0.0515722	0.791183	FLC3
YGL137W	0.015845	0.921956	SEC27
YGL135W	0.319332	0.0251464	RPL1B
YGL134W	-0.827615	0.00680296	PCL10
YGL133W	-0.00604263	0.982131	ITC1
YGL130W	0.131604	0.494844	CEG1
YGL125W	-0.328591	0.0402736	MET13
YGL123W	0.236991	0.0493153	RPS2
YGL119W	-0.404404	0.0336664	COQ8
YGL117W	0.0350264	0.91741
YGL116W	-0.234634	0.17964	CDC20
[truncated: 3,487 more rows]
