# Supplementary material for: Decapping factor Dcp2 controls mRNA abundance and translation to adjust metabolism and filamentation to nutrient availability
Source: eLife journal article supplement (doi:10.7554/elife.85545), 2023-06-02
Supplement: fig4-data3 [file Figure 4 – source data 3.xlsx]

## Sheet: Sheet1
		Specific activity/ug of protein in WT									Specific activity/ug of protein in dcp2
ORF name	Gene name	Replicate 1	Replicate 1	Replicate 2	Replicate 2	Replicate 3	Replicate 3	WT AVG		Gene name	Replicate 1	Replicate 1	Replicate 2	Replicate 2	Replicate 3	Replicate 3	dcp2-AVG	dcp2-AVG
YKR050W	TRK2	11671.2	11871.2	10545	12394.5	8196.49	6612.52	10215.2		TRK2	18873.8	19568.4	21849	23421.5	16953.4	16755.8	19570.3	19382
YLR174W	IDP2	4.37567e+07	4.59949e+07	5.41506e+07	5.23832e+07	4.59064e+07	4.60956e+07	4.80479e+07		IDP2	1.06278e+08	1.11295e+08	1.21801e+08	1.23199e+08	1.12865e+08	1.14524e+08	1.14994e+08	1.14993e+08
YPL258C	THI21	1.23812e+07	1.22106e+07	1.22538e+07	1.46438e+07	1.10308e+07	1.23693e+07	1.24816e+07		THI21	2.4823e+07	2.34716e+07	2.88877e+07	2.87032e+07	1.86066e+07	1.88968e+07	2.38981e+07	2.3898e+07
YDR242W	AMD2	4.07303e+07	4.17174e+07	3.71915e+07	3.93113e+07	3.55731e+07	3.09301e+07	3.75756e+07		AMD2	1.4072e+08	1.4782e+08	1.38034e+08	1.26081e+08	1.09288e+08	1.1263e+08	1.29096e+08	1.29095e+08
YKR097W	PCK1	29227.9	31836.2	27011.2	30681.4	20067.5	18181.6	26167.7		PCK1	56085.3	57774.3	72186.4	74474.3	43933.5	41383.7	57639.6	57451.3
YJR004C	SAG1	74280.2	85101.9	1.38017e+06	1.41144e+06	96290.2	88999.2	522713		SAG1	1.49326e+06	1.59876e+06	1.64863e+06	1.81124e+06	1.35004e+06	1.32589e+06	1.53797e+06	1.53778e+06
YBL075C	SSA3	4.47238e+07	4.93793e+07	6.38025e+07	6.11221e+07	6.47382e+07	6.34496e+07	5.78693e+07		SSA3	1.06008e+08	1.12149e+08	1.30553e+08	1.37718e+08	1.34274e+08	1.27803e+08	1.24751e+08	1.24751e+08
YHR211W	FLO5	4.00783e+06	4.10653e+06	5.29548e+06	5.6451e+06	4.8449e+06	5.25304e+06	4.85881e+06		FLO5	1.90834e+07	2.0537e+07	1.9776e+07	1.94111e+07	1.51079e+07	1.48131e+07	1.81214e+07	1.81212e+07
YAR050W	FLO1	1.15279e+07	1.16325e+07	1.17473e+07	1.21231e+07	1.15398e+07	1.19142e+07	1.17475e+07		FLO1	4.12546e+07	4.12715e+07	3.84036e+07	4.09424e+07	3.732e+07	3.9676e+07	3.98114e+07	3.98112e+07
YCR107W	AAD3	3.13898e+06	3.45569e+06	3.27685e+06	3.1308e+06	3.03786e+06	3.07946e+06	3.18661e+06		AAD3	1.14987e+07	1.21805e+07	1.03042e+07	1.09805e+07	1.69369e+07	1.60233e+07	1.29873e+07	1.29872e+07
YDR216W	ADR1	3.68181e+06	3.648e+06	3.23501e+06	2.98072e+06	3.71121e+06	3.7654e+06	3.50369e+06		ADR1	6.54216e+06	7.73221e+06	5.33621e+06	4.96191e+06	8.59802e+06	7.78454e+06	6.82584e+06	6.82566e+06
YCR089W	FIG2	107425	122521	169632	166990	112924	106526	131003		FIG2	559718	394115	768524	689056	476781	471331	559921	559732
YMR096W	SNZ1	1.25454e+08	1.25683e+08	1.06259e+08	1.06452e+08	1.07533e+08	1.07413e+08	1.13132e+08		SNZ1	2.23351e+08	2.19814e+08	1.63183e+08	1.5941e+08	2.50848e+08	2.52581e+08	2.11531e+08	2.11531e+08
vector control	vector control	140.317	148.104	173.036	159.28	133.286	130.56	147.431		vector control	81.1449	182.904	244.779	237.419	246.814	136.715	188.296
			ORF name	Gene name	dcp2/WT	P-value	p-value	p-value	SEM of dcp2/WT
			YHR211W	FLO5	4.41482	7.62707e-05	<0.001	***	0.306606
			YCR089W	FIG2	4.18498	0.000313851	<0.001	***	0.435125
			YCR107W	AAD3	4.05135	0.000404826	<0.001	***	0.282291
			YAR050W	FLO1	3.39095	1.36695e-07	<0.001	***	0.0616137
			YDR242W	AMD2	3.38686	1.0733e-05	<0.001	***	0.197231
			YJR004C	SAG1	2.87638	0.00577806	0.005	**	0.575521
			YLR174W	IDP2	2.38168	2.87967e-08	<0.001	***	0.0905867
			YKR097W	PCK1	2.1	0.000635818	<0.001	***	0.221112
			YBL075C	SSA3	2.0902	8.64664e-07	<0.001	***	0.138044
			YDR216W	ADR1	1.95055	0.000999715	<0.001	***	0.151126
			YPL258C	THI21	1.89162	0.000768718	<0.001	***	0.135784
			YKR050W	TRK2	1.88328	4.37593e-05	<0.001	***	0.167954
			YMR096W	SNZ1	1.87106	0.00181546	0.002	**	0.137743
			YER024W	YAT2	1.22938	0.10309	0.1	NS	0.192033
