# Supplementary material for: Decapping factor Dcp2 controls mRNA abundance and translation to adjust metabolism and filamentation to nutrient availability
Source: eLife journal article supplement (doi:10.7554/elife.85545), 2023-06-02
Supplement: fig4-figsupp1-data1 [file Figure 4 – figure supplement 1 – source data 1.xlsx]

## Sheet: Sheet1
Accession	dcp2-1	dcp2-2		Accession	WT-1	WT-2
A0A023PZF2	4672.8	4891.5		A0A023PZF2	1463.4	1543.2
A5Z2X5	6368.6	8284.7		A5Z2X5	2558.5	2647.6
D6VTK4	870.4	903.8		D6VTK4	8052.4	7365
D6W196	2133.7	2313.4		D6W196	6582.1	7001.9
O13297	11137.8	11525.9		O13297	602.8	606.2
O13329	1354.9	1387.6		O13329	3013.4	2962.3
O13516	2285	2139.6		O13516	4231.8	5076.4
O13525	1684.1	1801.7		O13525	20397	19810.3
O13535	630	663.1		O13535	8684.7	8827.5
O13539	5384.6	5815.2		O13539	1147.8	1212.9
O13547	1030.5	1112.7		O13547	5970.3	6547.4
O13563	29845.9	32510.4		O13563	797.5	797
O13577	126.4	119.8		O13577	34290.7	33157.9
O13585	1852.7	1842.7		O13585	19536.3	18617.3
O14455	127868	128134		O14455	125.8	94.1
O14464	6451.5	5926.2		O14464	2318	2356.2
O14467	90982.3	86178.6		O14467	12291.2	15299.4
O14468	1792.7	2466.7		O14468	17198.7	15230.5
O43137	6592.2	8724.4		O43137	8700.5	8890.9
O60200	6639.7	6602.3		O60200	3266.5	3264.9
O74700	48219.7	54684.3		O74700	137.1	129
O75012	2714.5	3179.2		O75012	3308.8	3518.8
O94742	5311.5	5867.7		O94742	2600.1	2738.2
P00044	16016.1	16804.1		P00044	83.6	55.2
P00045	2464.3	2587.4		P00045	2232.5	2169.8
P00127	5233.6	5426.6		P00127	2487.4	2423.6
P00128	16795.5	17503.6		P00128	849.7	798.7
P00175	2764.9	3418.5		P00175	2328.4	2220.3
P00330	460538	414680		P00330	214.5	192.1
P00331	1037.2	1408.3		P00331	12326.1	13204.8
P00358	24534.5	25396.9		P00358	1705.7	1763
P00359	918002	956522		P00359	198.9	209.6
P00360	25029.2	29256		P00360	507.3	722.4
P00401	5384.2	5603.9		P00401	1478.2	1461.5
P00410	21534.8	22441.3		P00410	46	61.1
P00424	15632	17657.8		P00424	1169.5	1100.4
P00425	3680.7	3792.4		P00425	4079.5	4167.4
P00427	26807.5	26723.3		P00427	337.2	390.7
P00431	26442.4	27823.9		P00431	142.1	146.9
P00445	61537.5	66576.3		P00445	79.9	99.2
P00447	12355.3	12028.2		P00447	4646.4	4159.8
P00498	57767.7	53980.6		P00498	3097.8	2979.8
P00546	25194.6	25899.6		P00546	1093.2	1084.7
P00549	520829	461225		P00549	194.2	197.9
P00560	971242	918577		P00560	15.9	16.4
P00572	3635.5	3764		P00572	1481	1445.5
P00635	1971.3	2259.9		P00635	2721.7	2747.1
P00724	12154.3	15139.5		P00724	1754.6	1488
P00729	14018.4	14934.4		P00729	873.9	946.4
P00812	36139	36825.9		P00812	4327.3	3867.6
P00815	99544.3	77730.3		P00815	439.8	387
P00817	91017.5	87071.9		P00817	896.4	863.1
P00830	86249.5	93940.4		P00830	203.1	216.7
P00854	253.9	279.6		P00854	62818.2	63970.7
P00890	44289.7	51993.8		P00890	743.2	763.2
P00899	49781.2	48873		P00899	82.8	74.1
P00924	97844.9	103122		P00924	87.8	76.7
P00925	644971	631294		P00925	51.8	42.3
P00927	42924	42837.3		P00927	230.5	212.7
P00931	117395	106557		P00931	241.8	167.4
P00937	59319.2	54809.8		P00937	325.9	310.3
P00942	58928.3	59564.2		P00942	369.1	391.8
P00950	404953	370014		P00950	57.1	51.9
P00958	116416	111207		P00958	160.6	149.8
P01094	3124	3909		P01094	3314.9	3093.8
P01097	11661.5	15395.7		P01097	1293.8	1206
P01098	10920.1	13556.3		P01098	2653.6	2682.1
P01119	10318.9	10509.2		P01119	1790.6	1677.8
P01120	16606.1	17614.9		P01120	901.6	875.9
P01123	76834	66738.2		P01123	65.3	71
P02293	92991.1	65998.5		P02293	145.4	120
P02294	6745.5	5335.3		P02294	1598.1	1551.1
P02309	27973	26598.8		P02309	227	199.4
P02381	5037.1	5614.7		P02381	852.3	872.3
P02400	43190.1	45849.7		P02400	3281.6	3359.9
P02406	72042.7	68455.1		P02406	489.1	468.7
P02557	32325.4	32295.3		P02557	304.3	309.2
P02829	38034	38684.8		P02829	1111.2	1092.9
P02992	25078.1	27887.9		P02992	1221.6	979.8
P02994	817477	815182		P02994	53.3	69
P03871	7387.5	7790.6		P03871	1210.5	1198.8
P03872	3914	3900.5		P03872	2630.4	2736.4
P03874	2626.5	2925.5		P03874	4980	5143.1
P03875	1761.7	2221		P03875	11661.2	11854.3
P03876	284.4	332.9		P03876	39906.7	38401.9
P03878	335.2	391.9		P03878	25332.6	27116.8
P03879	3317.9	3619.7		P03879	5633.5	5446.1
P03962	19397.7	19921.6		P03962	9755.4	10767.5
P03965	190334	202178		P03965	24	31.4
P04037	13135.9	15260.7		P04037	1054.3	1137.3
P04039	2278.5	2652.5		P04039	5217.1	4971.4
P04046	24413.3	23368.8		P04046	361.7	395
P04050	46486.4	45634.6		P04050	27.7	30.3
P04051	24514.5	24553.8		P04051	426.7	343.9
P04076	80721	78944.9		P04076	57.1	65.4
P04147	119828	120859		P04147	782.6	722.3
P04161	7143.6	6911.8		P04161	17651.2	16731.8
P04173	566.5	591.9		P04173	5870.2	5913.1
P04387	436.3	433.2		P04387	19675.9	20290.8
P04449	112061	104887		P04449	109.3	107.6
P04456	102612	102594		P04456	90.2	75.1
P04650	9960.1	9863.2		P04650	826.4	846.8
P04710	46.3	58.4		P04710	336249	331832
P04786	13598.3	13230.4		P04786	678.7	749.6
P04801	154111	152193		P04802	301.2	258.1
P04802	134068	127059		P04803	17508.9	18451.6
P04803	1153.9	1284.3		P04806	15.5	16.2
P04806	105602	112250		P04807	175.4	158.1
P04807	114013	112145		P04819	33273.3	34953.1
P04819	5730.9	5809.4		P04821	942.1	915.8
P04821	14473.8	15690.2		P04840	65.8	58.7
P04840	94266.4	95633.3		P04912	321.7	251.7
P04912	22194.2	20108.9		P05066	43338	40988.2
P05030	259150	252666		P05085	314.2	327.6
P05066	428.1	466.9		P05150	1667.2	1515
P05085	269.8	266.1		P05317	73.2	84.9
P05150	5409.6	5878.7		P05318	725	689.8
P05317	264087	299547		P05319	836.4	782.7
P05318	19936.2	23469.6		P05373	648.1	661
P05319	25147.6	27167.3		P05374	1501.9	1537
P05373	19873.3	20361		P05375	6709.5	5217.8
P05374	16410.1	16879.7		P05453	1103.2	1027.8
P05375	2860.6	3131		P05626	287.4	251.5
P05453	77361	69183		P05694	28.8	29.2
P05626	35433.5	38964.3		P05737	123.3	69.5
P05694	271617	275106		P05738	214.7	230.5
P05737	177710	175727		P05739	97.7	100.7
P05738	115131	118239		P05740	71.4	57.5
P05739	149887	146672		P05743	298.6	315.4
P05740	98369.8	93263.3		P05744	121.6	118
P05743	10903.8	10827.7		P05745	596.2	574.3
P05744	71300.7	74666.8		P05747	1769.2	1689.8
P05745	25070.2	25098.3		P05748	1614.4	1453.6
P05747	10439.9	10497.1		P05749	344.8	329.9
P05748	110938	109332		P05750	492.8	412.2
P05749	21427	25097.8		P05755	97.2	80.2
P05750	265163	269133		P05756	483.6	484.4
P05755	231146	207794		P05759	933.4	812.4
P05756	67678.6	68564.6		P05986	7802.1	7646.1
P05759	283174	286190		P06100	10403.1	9167.7
P05986	1536.7	1634.6		P06101	393.3	315.2
P06100	2828.5	2674.6		P06102	1125.5	1106
P06101	37848.1	38839.3		P06103	2190.5	2093.7
P06102	16448	16208.3		P06104	2752.2	2705.8
P06103	106226	101039		P06105	113.5	115.4
P06104	2969	2914.7		P06106	1290.9	1180.3
P06105	141897	137776		P06115	1652.9	1733.9
P06106	110585	108623		P06168	165.7	161.8
P06115	4293.6	4478.5		P06169	328.4	279.8
P06168	298697	274752		P06174	1966.6	1812.1
P06169	544979	545896		P06182	2477.5	2481.5
P06174	2311.3	2325		P06197	935.1	972.9
P06182	4939	5685.3		P06208	157.8	130.7
P06197	6274	6133.9		P06242	10828	9174
P06208	154876	149468		P06243	5035.5	4807
P06242	1787.4	1925.2		P06244	17841.9	18301.4
P06243	1493.5	1420.6		P06245	26977.7	28487.6
P06244	3270.7	3492.3		P06367	572.5	533.5
P06245	786.1	820.5		P06633	5912.6	5711.2
P06367	99791.7	97575.7		P06634	53.3	43.6
P06633	2376.7	2072		P06700	18491.6	18056.3
P06634	146535	141761		P06701	2231.3	2372.4
P06700	2753	2802.5		P06704	799.7	850.6
P06701	3972	4414.6		P06738	23.1	19.1
P06704	8840.6	9424.9		P06773	1298.6	1233.8
P06738	68382.2	78046.7		P06774	251344	251053
P06773	4822.2	4439.1		P06775	4231.4	4113.1
P06774	54.1	62.5		P06776	3714.9	3479.8
P06775	1174.9	1206.5		P06777	8536	8481
P06776	4817	5053.9		P06778	5929.1	6174.6
P06777	1256.8	1317.3		P06779	10961	11154.3
P06778	1870.5	1888.3		P06780	4064.1	4397
P06779	687.2	733.8		P06781	7193.1	7096.7
P06780	23618.9	24722.6		P06782	461.1	514.9
P06781	1390.5	1423.3		P06784	7590.6	7816.4
P06782	14011.4	14601.2		P06785	1005.5	1032.8
P06784	1782.3	1845.6		P06786	1086	961.5
P06785	9215.9	9659.9		P06787	197.8	153.2
P06786	18666.9	19158.4		P06838	16053.4	16537.3
P06787	37733.7	46164.6		P06839	3983.3	3965.5
P06838	466	469.4		P06843	1064.5	977.6
P06839	5023.6	4988.5		P06844	24601.1	24657.1
P06843	8973.9	9003.4		P07143	5541.6	5204.7
P06844	1098.5	1116.9		P07149	200.1	168.9
P07143	11189	12264.6		P07170	192.3	190.5
P07149	338085	365614		P07172	613.3	625.3
P07170	96576.9	93115.5		P07213	108.8	104
P07172	19762.7	19457.5		P07236	14681.5	15851.6
P07213	74673.6	74902.2		P07244	2032.9	1823.1
P07236	2218.6	2615.4		P07245	248.2	258.4
P07244	53881.2	51902.8		P07246	437.2	376.7
P07245	81662.4	80156.5		P07248	2051.8	1881.1
P07246	47583.1	44311.8		P07249	27223.9	28714.2
P07248	3240.7	3849.5		P07250	26878.6	26877.1
P07249	182.1	160.2		P07251	800.2	788.3
P07250	640.2	680.9		P07252	30650.5	30596.3
P07251	111073	117773		P07253	8754.2	9073.1
P07252	177.4	180.7		P07255	6848.2	6453.3
P07253	9780	10830.5		P07256	255.8	219.9
P07255	4002	4774		P07257	696.2	635.3
P07256	44814.8	46333.6		P07258	434.4	402.2
P07257	72925.4	75109.8		P07259	88.2	69.7
P07258	16690.9	16049		P07260	200.5	182.2
P07259	148530	152515		P07261	17345.3	15943.6
P07260	62622.7	56850.4		P07262	33.7	43.6
P07261	743.6	793.4		P07263	970.6	639.5
P07262	286930	283648		P07264	69	65.8
P07263	63731.8	59747.6		P07266	3685.7	2088.6
P07264	278649	256761		P07267	1181.5	1264.9
P07266	1874.9	2042.8		P07269	13152.6	13883.2
P07267	46395.5	51845.9		P07270	8627.8	8263.8
P07269	1910.3	2001.3		P07271	4104.8	3471.8
P07270	1632.2	1579.8		P07272	318784	319788
P07271	1104.4	1193.4		P07273	148.3	161.7
P07272	156.7	149.8		P07274	781.5	741.1
P07273	33794.3	28945.7		P07275	323.2	319
P07274	19780.4	21681.9		P07276	24640.4	22810.2
P07275	38742.1	39007.5		P07277	2498	2290
P07276	677.4	654.7		P07278	661	628.9
P07277	9092.3	9278.1		P07280	26.3	22.3
P07278	36960.9	37938		P07281	2336.2	1740
P07280	191298	180939		P07283	103.8	91.3
P07281	7050.3	4001.9		P07284	41.5	37.5
P07283	64593.7	65640.8		P07285	1563	1368.8
P07284	108659	105003		P07286	45954	46088.3
P07285	8413.1	7809.6		P07342	82.6	69.7
P07286	225.6	254.4		P07347	1810	1733.6
P07342	154026	143039		P07560	658.3	735.1
P07347	7219.2	7515.2		P07702	1148.9	1285.6
P07560	31659.6	29686.6		P07703	160.3	144.5
P07702	74353.7	71254.7		P07806	74.8	76.3
P07703	49349	47810.7		P07807	59599.4	62448
P07806	139724	134671		P07834	10279.4	10212.8
P07807	359.6	352.9		P07866	7688.2	7378.1
P07834	1358.9	1399.2		P07884	3666.7	3643.1
P07866	1382.7	1324.7		P07991	447.4	449.1
P07884	3509.6	3668		P08004	1181.2	1169.6
P07991	17043.1	17781.9		P08018	5278.6	5714.7
P08004	7456.4	7401.7		P08067	997.9	1013.3
P08018	5610.9	5683		P08153	97665	94350
P08067	12644.2	14270.9		P08417	187.8	176.6
P08153	429.9	430.2		P08425	8739.2	8572.8
P08417	36052.7	37929.8		P08432	20693.4	19867.5
P08425	1673.3	1853.4		P08456	7832.2	8013.9
P08432	1604.5	1697.7		P08465	5090.3	4621.8
P08456	2442.1	2435.2		P08466	960.5	957.3
P08465	1727.5	1696.4		P08518	305.1	302.2
P08466	10566	11007.3		P08524	212.2	174.1
P08518	39128.9	39960.9		P08525	1368.7	1328.2
P08524	100644	92502.3		P08536	9213.9	9426.1
P08525	4691.4	5630.4		P08539	1356.1	1336.2
P08536	4155.1	3981.8		P08566	97.5	70.6
P08539	9027.3	9217		P08593	21795.6	22243.3
P08566	134944	129285		P08638	6930.2	6698.2
P08593	834.8	872.8		P08678	3447.5	3521.9
P08638	663.2	684.9		P08679	2378.4	2482.8
P08678	8178.1	8644.3		P08964	392.1	355.5
P08679	9103.7	9742.1		P09032	534.4	556
P08964	11687	11339.1		P09064	283.5	257.3
P09032	12890.8	13367.9		P09232	416.8	318
P09064	62270.8	60159		P09368	7297.5	7072.9
P09232	43030.8	45609.8		P09435	9092.4	9483.1
P09368	3488.3	3990.9		P09436	151.5	155.8
P09435	613.3	783.4		P09440	301	296
P09436	171148	160723		P09457	506.9	486.2
P09440	53154.7	53454.6		P09547	4666	4643.8
P09457	33126.8	36829.1		P09620	464.2	435.7
P09547	2231.8	2376.3		P09624	212.6	198.2
P09620	4337.6	3866.1		P09733	8170.8	8506.3
P09624	96429.6	95027.9		P09734	5591.4	5832
P09733	9845.9	10061.9		P09798	109156	104083
P09734	15680.3	15636.4		P09880	839.3	691.4
P09798	2829.8	2962.1		P09932	207723	198468
P09880	10642.8	10590.8		P09938	435.9	447.1
P09932	152.5	160.8		P09950	537.7	496.3
P09938	45466.1	50997.9		P09959	7426.7	7057.7
P09950	11209.1	11315		P0C0V8	199.1	166.3
P09959	4198.5	4279.5		P0C2H6	21.3	22.4
P0C0V8	94847.1	115209		P0C2H8	197.9	187.8
P0C2H6	88588.2	86233.3		P0C2H9	1194.2	1151.1
P0C2H8	84341	83569.2		P0C2I8	6970.7	6283.2
P0C2H9	11137.2	11362.3		P0C5N3	5198.4	5354.1
P0C2I8	1318	1366.7		P0CE41	18822	18694.6
P0C5N3	2664	2883.4		P0CH09	961.7	918
P0CE41	792.6	773.6		P0CS90	97.3	78.3
P0CH09	35697	35195.4		P0CT04	430.5	445.8
P0CS90	233661	244834		P0CT86	22319.8	20733
P0CT04	15251.4	19183		P0CW40	178854	174858
P0CT86	524.9	580.2		P0CX10	11601.6	11288.5
P0CW40	22.2	23.7		P0CX13	4592.5	4464.8
P0CX10	293.1	337.6		P0CX14	9073.8	9783.5
P0CX13	3226.9	2916.5		P0CX21	50615.6	52673.2
P0CX14	3406.5	3492		P0CX24	138.4	107.5
P0CX21	128.5	133.7		P0CX26	175.8	137.7
P0CX24	94450.4	94196.9		P0CX27	241.9	213.2
P0CX26	108078	102564		P0CX30	147.1	136.5
P0CX27	64752.3	56283.2		P0CX31	34.4	33.7
P0CX30	131607	114406		P0CX34	1569.6	1421.8
P0CX31	208406	205952		P0CX38	38.1	25.7
P0CX34	33995.1	34213.1		P0CX40	190.9	222.7
P0CX35	276518	269100		P0CX41	374.2	395.1
P0CX38	196393	188044		P0CX43	267.3	218.3
P0CX40	81559.6	74671.2		P0CX46	162.3	140.2
P0CX41	117192	117331		P0CX48	29.5	33.7
P0CX43	131952	134238		P0CX52	2626.9	2952
P0CX46	147117	137019		P0CX53	350.3	417.3
P0CX48	92387.8	90842		P0CX57	5076.6	2890.8
P0CX49	146704	139084		P0CX78	20686.5	21328.5
P0CX52	145830	136815		P0CX81	10202.3	9348.7
P0CX53	132344	134295		P0CX83	69	55.7
P0CX55	161165	159319		P0CX85	75.7	75.9
P0CX57	3584.8	3529.8		P0CY09	28626.1	27664.2
P0CX78	286.9	347.5		P10080	754.7	566.4
P0CX81	1888.7	3289.4		P10081	121.1	123.7
P0CX83	110733	104434		P10127	35110.7	34667.1
P0CX85	114960	110336		P10355	17420.7	17297.9
P0CY09	461.2	488.8		P10356	8168.6	8293.3
P10080	39116	38730		P10363	6604.3	6561.8
P10081	149804	148293		P10507	1037.1	1252.1
P10127	627.6	734		P10566	6347.3	6575.1
P10355	1020.7	1017.7		P10591	21.9	11.6
P10356	2900.1	2988.5		P10592	57.3	50
P10363	6392.4	6693.7		P10614	80.7	78.1
P10507	14048.7	14764.9		P10622	979.7	1012
P10566	334.6	368.3		P10659	164.4	176.2
P10591	635208	641945		P10662	1434.5	1307.5
P10592	85083.2	93787		P10663	4085	4138.7
P10614	33802.1	32465.3		P10823	8947	8053.2
P10622	12751	12855.5		P10834	20657.7	20753
P10659	30170.8	27045.6		P10849	4569.7	4451.3
P10662	10141.4	11000.4		P10862	117344	111672
P10663	1983.8	2310.9		P10869	95.5	91.3
P10664	247062	250884		P10961	3143.4	2636.4
P10823	3362.7	3626.2		P10962	838.6	765.2
P10834	1539.9	1645.4		P10963	1307.5	1164.9
P10849	3917.5	4355.8		P10964	77.6	61.9
P10862	308.6	347		P11075	1484.3	1581.2
P10869	49772.2	49309		P11076	125.7	148.9
P10961	1542.8	1665.9		P11154	3039.9	3044
P10962	15528.5	15647.4		P11325	6042.4	5593.6
P10963	146.8	185.9		P11353	2501.7	2492.3
P10964	102199	99249.3		P11412	291.5	248.8
P11075	34266.8	35494.1		P11433	7924	8377.3
P11076	92056.4	99751.9		P11484	309.7	336.9
P11154	8273.4	9568.8		P11491	1414.3	1488.7
P11325	4573.7	5265.8		P11632	447.7	406.9
P11353	5835.7	5653.6		P11633	736.6	673.7
P11412	51981.2	54283.7		P11655	4782.7	4850.4
P11433	5875.8	6113.6		P11709	2669.8	2484.4
P11484	456351	447292		P11745	72.5	74.9
P11491	12687.2	12194.7		P11746	13752.1	14404.2
P11632	25120.1	23106.8		P11747	19684	18662.7
P11633	7616.9	7159.4		P11792	1595.7	1693.2
P11655	6909.4	6718.1		P11914	2391.3	2406.7
P11709	6867.8	6182.2		P11938	1423.3	1417.9
P11745	65651	65908.5		P11972	846.7	792.5
P11746	1348.6	1428.2		P11978	4146.1	4264.7
P11747	873.2	870.8		P11986	4490.7	4277.9
P11792	8657.3	8303.6		P12383	18428.2	16544.2
P11914	16574.3	17408.9		P12385	147.3	148.7
P11938	7257.9	7672.7		P12611	1048.1	1104.3
P11972	4663.2	4889.1		P12612	404.1	383
P11978	1724.4	1836.1		P12630	6620.7	6675.1
P11986	2124.1	2449.7		P12683	706.2	665.4
P12383	3614.8	3779.3		P12684	12499.1	13192.1
P12385	94070.4	84075.4		P12686	4074.7	4258.4
P12611	10881.2	11216.2		P12687	1118.2	993
P12612	57332	52896.9		P12688	917.7	880.1
P12630	420.5	479.2		P12689	292046	314541
P12683	34304.4	29962.2		P12695	143.3	119.4
P12684	5718.6	5518.4		P12709	12.6	12.8
P12686	4331.2	5081.2		P12753	1349.5	1424.1
P12687	11460.6	12507.8		P12754	10682	8614.5
P12688	21900.1	23282.3		P12866	1509.8	1414
P12689	28.7	33		P12868	6457.9	6141.3
P12695	93071	87449.6		P12887	1649.8	1596.2
P12709	189126	182419		P12904	2458.3	2718.1
P12753	8508.6	9308.5		P12945	165.8	250.6
P12754	11731.8	11471.9		P12954	30486.5	24949
P12866	2223.6	2047.5		P12962	1122.3	1024.3
P12868	3040.8	3100.7		P13099	3482.4	3251
P12887	2361.8	2243.1		P13130	18236.2	19818.3
P12904	15685.4	16104.3		P13134	14855.8	15135.2
P12945	53254.5	51992.1		P13185	1137.4	942
P12954	909.8	915.1		P13186	4667.7	4871.5
P12962	11856.6	12944.8		P13188	809.2	825.3
P13099	578.9	566.5		P13259	1999.9	1945.1
P13130	93.8	96.6		P13298	1638.8	1514
P13134	856.9	828.9		P13382	1424.6	1409.4
P13185	7949	8399.6		P13393	6883.5	7611.7
P13186	3250.8	3269.4		P13433	4271.8	4658.8
P13188	114513	110579		P13434	29531.6	29699.3
P13259	5466.3	5351.3		P13483	35869.1	36004.8
P13298	20601.9	23273.9		P13517	578.5	600.1
P13382	10098.6	10250.1		P13574	2878.8	2800.2
P13393	3621.3	3644.6		P13586	914.3	829.3
P13433	4189.5	4817.8		P13587	4314.7	4904.2
P13434	834.8	925.9		P13663	648.4	619.1
P13483	464.5	520.1		P13711	140826	138950
P13517	14846.3	17108.3		P13712	13017	13073.5
P13574	4241.9	4316.8		P13856	1783.4	1815.9
P13586	17128.7	16689.5		P13902	244230	231453
P13587	9241.8	9094.2		P14063	8918.1	9344.8
P13663	100839	92574.6		P14065	163.3	128.9
P13711	49.7	61.1		P14066	25088	24146.8
P13712	839.5	845.6		P14120	148.8	149
P13856	5554.9	5509		P14127	292.3	298.2
P13902	88.6	96.3		P14164	786.9	804.3
P14020	46902.5	42873.9		P14180	930.7	902.4
P14063	4348.4	4873		P14242	266130	263188
P14065	23664.4	27677.4		P14306	8330.8	8401.3
P14066	230.4	253.9		P14540	28.1	35.6
P14120	73860.5	67591.7		P14680	7517	6846.5
P14126	465290	451068		P14681	6237.3	6231.3
P14127	87736.3	83148.5		P14682	953.7	994.6
P14164	8752.7	9247.6		P14693	6681.6	6221.7
P14180	4750.6	4775.3		P14736	4966.7	4365.6
P14242	405.6	416.3		P14737	17453.4	17217.2
P14306	2646.2	2989.4		P14741	1465.5	1560
P14540	224603	210227		P14742	159.2	183.2
P14680	3275.4	3568		P14743	1036.8	898.6
P14681	833.2	960.5		P14747	512.6	607.5
P14682	10461.3	10164.2		P14772	1431.9	1507.6
P14693	1467.1	1685.3		P14832	152.9	173.5
P14736	882.5	741.7		P14843	440.7	423.9
P14737	481.6	489.9		P14904	257.2	271
P14741	9909.6	10547		P14905	189279	182642
P14742	82675.8	89601.9		P14906	936.4	675.1
P14743	11755.2	11713.6		P14907	3220.2	2414.2
P14747	21992.2	22320.2		P14908	5324.7	5380.7
P14772	8280.9	8423.4		P14922	560.4	503.4
P14832	135689	163941		P15019	47.4	43.7
P14843	32768.1	31472		P15108	54.1	77.4
P14904	29323.3	28848.1		P15179	3456.7	3545.9
P14905	747.2	839.6		P15180	90.7	75.7
P14906	44581.6	41639.4		P15202	103963	134709
P14907	31254.1	31897.1		P15274	794.9	778.7
P14908	2281.8	2405.5		P15303	638.5	618.6
P14922	16494.9	17022		P15315	15132.4	25320
P15019	99127.1	100516		P15365	8403.8	8097.9
P15108	518206	513741		P15367	2639.2	2539.5
P15179	3971.2	4124.6		P15380	29258.5	27698.1
P15180	157042	145808		P15424	938.3	930.5
P15202	22.1	32.3		P15436	1236.8	1186
P15274	15603.3	16831.1		P15442	2366.6	2316.8
P15303	40154.9	41184.1		P15454	57.4	52.3
P15315	1009	1075.9		P15496	309.9	347.5
P15365	87.9	93.3		P15565	315.9	399.7
P15367	6194	6159.2		P15624	5580.5	5574.1
P15380	251.3	255.1		P15625	1420.4	1369.7
P15424	20761.6	22845.5		P15646	778.9	788.3
P15436	8722	8923.9		P15700	4333.5	4285.3
P15442	4061.1	4454.6		P15703	475.2	509.1
P15454	41595.2	40340.5		P15705	72.8	82.7
P15496	26903	30170.1		P15731	731.2	687.8
P15565	19950.2	19770.8		P15732	2471.7	2521.2
P15624	95191.8	90082.2		P15790	275.1	298.9
P15625	84642.4	79481.1		P15801	10530.2	10882.8
P15646	106030	102677		P15807	20498.6	19818.6
P15700	16602.7	16231.1		P15873	230.9	242.4
P15703	16751.2	17128.9		P15891	106.4	89.1
P15705	176232	174018		P15938	5424.8	5521.6
P15731	8502.6	8303.6		P15992	715.4	769.9
P15732	2598.5	3067.9		P16120	586.6	546.9
P15790	16479.9	16539.1		P16140	479.6	418.4
P15801	587.5	594.8		P16151	10833.2	11161.7
P15807	1282	1395.3		P16370	1279.7	1204.8
P15873	61147.4	63172.9		P16387	2052.1	1820.6
P15891	120810	119410		P16451	943.5	856.5
P15938	1541.9	1610.3		P16467	1142.1	1183.1
P15992	29105.9	30734.6		P16474	203.8	204.3
P16120	233137	226060		P16521	12.4	8.5
P16140	107233	103570		P16522	22301.8	23178.3
P16151	416.5	387.2		P16547	569.6	533.4
P16370	21798.3	19305.5		P16550	36.6	47.2
P16387	70980.2	70716.5		P16603	217.1	191.8
P16451	16751.5	16472		P16622	337.6	294.1
P16467	3141.7	3427.9		P16639	3678.1	4029.7
P16474	151396	155864		P16649	96.9	73
P16521	507870	459866		P16658	65176	64046.1
P16522	716.1	739.9		P16661	6125.5	5961.5
P16547	12607.1	14547		P16664	14709.3	13744.3
P16550	104048	99056.5		P16861	216.7	179.1
P16603	21267.1	20384.7		P16862	568.6	652
P16622	10739.9	11293.8		P16892	1603.6	1471.8
P16639	2068	2053.4		P16965	3011.7	3006.3
P16649	55326.5	57993.2		P17064	2889	2836.2
P16658	123.4	133.8		P17065	4502.1	4676.7
P16661	2498.5	2577.7		P17076	87.7	88.6
P16664	1180.2	1241.8		P17106	2344.2	2694.8
P16861	212778	198473		P17119	3015.6	2942.6
P16862	145452	137656		P17121	4491.7	4394.6
P16892	7581.5	7316.1		P17123	18947.4	18227
P16965	2923.2	3306.8		P17157	3247.3	3352.7
P17064	2822.6	2678.2		P17214	10057.8	10283.2
P17065	3330.1	3607.8		P17255	444.3	476.4
P17076	220395	224583		P17423	775.8	674.6
P17106	11148.5	12344		P17442	647.2	675.5
P17119	2785.2	3106.8		P17505	717.3	682.9
P17121	1864.7	1976.8		P17536	202.4	232
P17123	582.6	617.4		P17555	106.9	148
P17157	9526.5	9933.8		P17558	2384.4	2161.2
P17214	3460.3	3609.3		P17629	2896.2	3239.7
P17255	280150	263866		P17649	117	94.4
P17423	30008.1	30433.6		P17695	128.1	189.1
P17442	14048.7	14832.1		P17709	463.5	443.1
P17505	32220.3	36191.1		P17883	1263	1043.2
P17536	51789.2	59956.6		P17890	4556.6	4739.7
P17555	42235.3	43630.2		P17891	134.6	147.9
P17558	10615.3	11944.7		P17898	8326.9	8584.8
P17629	4537.1	4536.2		P18238	31264.7	31092.3
P17649	22918.6	23308.8		P18239	1794.8	1743.5
P17695	26774.3	27773.2		P18408	52082.4	51915.7
P17709	88191.6	94663.9		P18409	23060.1	24177.7
P17883	13117.7	13140		P18410	7494.6	7573.1
P17890	4304.9	4669.3		P18411	16720.7	16415.3
P17891	39036.3	40349.6		P18412	87527.2	87573.1
P17898	1702.1	1500.1		P18414	4964.4	4671.9
P17967	196152	202829		P18480	3056	3378.1
P18238	258.7	245.1		P18494	20488.9	21042.6
P18239	137040	151986		P18496	11012.4	11459.3
P18408	109.1	108.1		P18544	1666.5	1426.8
P18409	620.2	685.8		P18562	729.1	799.5
P18410	1471	1430.4		P18634	6936.1	6875.4
P18411	924.9	1089.3		P18759	899.4	818.6
P18412	54.6	67.6		P18851	10520.5	10524.7
P18414	3300.5	3035.9		P18852	2627.4	2653.4
P18480	2119.7	2240		P18888	8971.8	8804.8
P18494	674.9	657.7		P18898	25676.9	25542.5
P18496	3072.3	3499		P18899	580.4	552.9
P18544	7534.1	7567.4		P18900	2416	993.8
P18562	71369.3	65696.9		P18961	2751.1	2666.5
P18634	482.1	464.2		P18962	6739.7	6191.4
P18759	35657.3	37246.5		P18963	7664.3	7539.9
P18851	4265.1	4369.5		P19073	4022.2	3145.8
P18852	1218	1182.1		P19097	155.5	139.4
P18888	840.3	899.7		P19145	6054	6053.3
P18898	292.8	301		P19146	12087.7	12106.3
P18899	20907.7	26345.9		P19158	5888.8	5483.3
P18900	7172	7337.4		P19262	1595.2	1584.5
P18961	2746.5	3348		P19263	1905.3	1752.4
P18962	5726.2	5812.5		P19358	85	69
P18963	4896.7	5075		P19414	442.7	431.9
P19073	9138.6	9777.4		P19454	340.1	361.4
P19097	408203	440599		P19516	26225.2	27733.5
P19145	10128.3	7952.6		P19524	210.7	211.7
P19146	504.1	624.7		P19541	56671	58398.4
P19158	3116.9	3198.1		P19657	407909	402541
P19262	15356.5	16218.6		P19658	81483.7	92381
P19263	6174.3	5778.7		P19659	4089.9	4271
P19358	140809	126912		P19735	1415.8	1583.9
P19414	226464	225976		P19736	10445.9	10285.9
P19454	25864.3	25343.8		P19807	25832.1	25639.6
P19516	941.7	1010.1		P19812	492.8	459.1
P19524	31294.4	32887		P19880	15744	16994.8
P19541	228.9	247.9		P19881	1616	1660.8
P19657	6.1	3.3		P19955	4524.5	4240.6
P19658	3584.8	3652.1		P19956	19380.9	19139.6
P19659	4277.3	4551.7		P20048	56099	58041.3
P19735	1789.5	1835		P20049	1584.3	1427.9
P19736	1125.2	1244.9		P20051	877.5	821
P19807	421.3	420.9		P20053	56059.8	57537.7
P19812	8156.9	8502		P20081	89	77.7
P19880	2836.1	2899.5		P20084	1295.1	1243.6
P19881	17338.6	16336.7		P20095	9134.4	8896.1
P19882	276858	274252		P20107	62296.6	58624.6
P19955	6004	6349.3		P20133	2838.2	2844.2
P19956	2086.7	2313.2		P20134	14820.6	13996.6
P20048	357.1	339.5		P20424	205.3	218.1
P20049	10325.4	10214.1		P20433	5242.2	5513.7
P20051	8696.5	9791.9		P20434	645.5	804
P20053	1314.8	1433		P20435	945	930.4
P20081	57049.2	65719.1		P20436	679.6	610.1
P20084	8350.8	9821.8		P20447	582.6	482.3
P20095	1213.3	1278.5		P20448	855.4	820.3
P20107	1967.9	1911.5		P20449	228.5	202
P20133	4601.7	4920.4		P20457	11718.7	11322.2
P20134	601.5	603.5		P20459	171.6	151.8
P20424	25195.2	24800.2		P20484	784.8	797.2
P20433	3581.1	3705.8		P20485	1264	1266.6
P20434	17105.7	16603.5		P20486	562.5	528.1
P20435	19335.1	21015.1		P20604	3313.9	3304.7
P20436	18258.4	20727.9		P20606	934.9	871.4
P20447	38755.2	37958.3		P20676	1595.7	1426.1
P20448	20411.6	19708.6		P20795	1113.5	1120.7
P20449	42622.8	42966.8		P20967	181.6	161.4
P20457	5675.2	5701.8		P21147	268.3	292.8
P20459	88877.2	91202.5		P21182	1661	1580.1
P20484	18923.4	18411.5		P21192	19555.7	19024.4
P20485	8830.3	9508.5		P21242	559.5	519.8
P20486	6123.6	6457.2		P21243	420.1	430.6
P20604	11499.2	12268.7		P21268	39905.5	46818.5
P20606	20074.2	20358.3		P21269	1782.2	1570.3
P20676	8087.3	8393.1		P21304	481.3	497.3
P20795	2426.1	2549		P21306	1116.9	1041.1
P20967	42376.8	45230.3		P21339	5041.1	4874.9
P21147	25431.8	25965		P21372	3557.6	3436.7
P21182	9185.8	8977.7		P21373	8253.1	8414.7
P21192	613.7	662.8		P21374	4698.1	4265.4
P21242	24162.4	24695.2		P21375	37529.4	33813.7
P21243	29645.7	30441.4		P21524	93.9	87.5
P21268	575.1	606.3		P21538	627.4	595.4
P21269	10248.7	10392.2		P21560	812.3	864.2
P21304	44046.2	43330.7		P21576	108.1	101
P21306	10571.5	12885.8		P21592	25790.5	25454.9
P21339	3081.6	3122.8		P21657	9442.5	9209.6
P21372	2154.5	2229.1		P21672	44161.6	46845.6
P21373	4447.9	4630.2		P21705	26958.9	26000.6
P21374	508.5	524.9		P21734	1142.3	1175.6
P21375	6124.5	6153.1		P21771	530.4	467.1
P21524	51993.7	49394.8		P21801	1151.9	1081
P21538	11439.4	12296.2		P21825	883.9	982.4
P21560	11457.9	12639.3		P21826	126117	123739
P21576	63345.1	64405.2		P21827	36108.5	33726.3
P21592	613	677.6		P21951	1850.3	1964.8
P21657	487	480.3		P21954	125	126.3
P21672	414.7	411		P21957	16938.8	16150.2
P21705	208.7	217.5		P21965	2123.2	1896.2
P21734	29295.8	30749.8		P22007	17082.8	17397.9
P21771	17381.3	18266		P22023	8219	8192
P21801	11538.9	13497.1		P22035	5725.4	5631.2
P21825	13704.4	14070.1		P22082	3326.4	3349.2
P21826	122.7	132.9		P22108	11773.8	12708.9
P21827	13611.1	13862.8		P22133	4210.3	3916.2
P21951	5285.2	5621.2		P22134	19619.3	19197.1
P21954	45888.3	45952.6		P22135	8082.4	6256.5
P21957	2857.3	3100.3		P22136	9073.2	9280.9
P21965	34396	33863.4		P22137	43.8	47.1
P22007	600.5	583.7		P22138	72	53
P22023	3299.4	3472		P22139	1761.7	1777.8
P22035	1073.9	1075.7		P22140	270934	282398
P22082	4305	4473.6		P22141	336.5	350.8
P22108	2553.7	2581.7		P22146	424.7	343.4
P22133	2736.3	2749.8		P22147	656.8	614.9
P22134	366.1	406.2		P22148	16554.6	15893.1
P22135	8944.6	9180.1		P22149	31355.7	35137.4
P22136	1702	1812.3		P22202	492.4	522
P22137	81787.8	81554.5		P22203	260.8	205.5
P22138	55968.8	54493.3		P22204	8745.1	9121.9
P22139	20819.6	22713.9		P22209	6215.3	5985.9
P22140	419	402.3		P22211	5595	5702
P22141	19574.3	15616		P22213	2949.5	3584.7
P22146	57589.8	51316.1		P22214	2803.6	3024.4
P22147	81840	77475.4		P22215	7349.6	7469.5
P22148	249	241.5		P22216	6302.3	6015.1
P22149	782.9	807.8		P22217	502.2	517
P22202	10660.4	12142.7		P22219	7666.4	7486.1
P22203	60395.3	59853.7		P22224	1988.7	1788
P22204	2350	2403.7		P22276	390.3	376.7
P22209	2999.9	3078.9		P22289	1159.8	1190.5
P22211	5492.7	5761.5		P22336	2541.4	2552
P22213	21237.9	20931.8		P22353	2319.5	2279.7
P22214	3974	4076.6		P22354	4779.5	4806.1
P22215	1284.3	1209.8		P22434	33451.6	33967.7
P22216	1132.9	1047.5		P22438	12067.8	12195.1
P22217	66012.4	77869.6		P22470	4007.2	4018.7
P22219	1245.8	1194.1		P22515	501.8	365.7
P22224	4407.3	4958.9		P22517	1028.6	902.8
P22276	19680.9	20135.5		P22543	5197.1	4692.6
P22289	6285.8	5647.2		P22579	530.2	447.2
P22336	32807	30847.8		P22580	16372	15333.2
P22353	4914.7	5336.9		P22696	1956.3	1770
P22354	3718.7	4063		P22768	81.7	62.9
P22434	476.1	529		P22803	387.3	486.2
P22438	3222.4	3633.7		P22804	28540.6	31348.3
P22470	2910.3	3021.1		P22855	2455	2227.5
P22515	83531.2	82631.7		P22936	23183.3	23673.6
P22517	10660.1	11283.3		P22943	3603.8	1180.6
P22543	1467	1491.5		P23059	5531	5472.5
P22579	11828.3	12551		P23060	16676.8	16573.8
P22580	544.2	613.9		P23180	175.5	176.2
P22696	10034.2	10719.1		P23201	674.3	642
P22768	83433.4	82533.7		P23202	499.3	460.1
P22803	24108.7	29464.7		P23248	249.6	243.4
P22804	1835.8	1889.7		P23250	15651.8	15355.4
P22855	6946.5	8160.7		P23254	142.1	141.9
P22936	6417.6	6645.8		P23255	302.9	259.6
P22943	162548	245944		P23285	3028	2999.7
P23059	610.6	733.5		P23287	5257	5257.7
P23060	928.1	924.2		P23291	1600.8	1657.5
P23180	13078	13577.6		P23292	619.3	538.1
P23201	17306.9	17110.1		P23293	1592.6	1577.3
P23202	10781.7	10732.2		P23301	487.7	454.2
P23248	210857	194911		P23337	1156.7	1125.3
P23250	237.3	215.5		P23369	790.2	790.5
P23254	115170	98748.3		P23394	1200.3	1086
P23255	7997.5	8072.1		P23500	4681.1	4745.2
P23285	1720.8	1958		P23503	4015.6	3867.1
P23287	5372.3	5537.3		P23542	845.3	835.9
P23291	3834.9	3738.7		P23561	21421.7	24670.9
P23292	11013.6	10944.9		P23585	554.5	561.7
P23293	9760.5	10195.7		P23594	3165.6	3044.2
P23301	151572	161616		P23595	4567	4503.2
P23337	6152.8	6615		P23615	508.3	527.6
P23369	5790.6	6259.3		P23638	469.5	513.3
P23394	4642.4	4808.5		P23639	1082.2	905.8
P23500	1412.6	1420.8		P23641	708.6	805.3
P23503	3692.2	3870.4		P23642	1209.7	1009.9
P23542	55698.8	54693.5		P23643	11684	11931.5
P23561	524.3	582.1		P23644	214.9	204.2
P23585	19874	19296.6		P23724	1078.1	1053.7
P23594	1229.9	1422.1		P23748	62300.5	62342.8
P23595	7548.7	8806.2		P23776	562.2	467.5
P23615	47109.9	47483		P23796	5089.8	4869.7
P23638	31462.9	31785.1		P23797	6960.8	7837.9
P23639	26212.1	26594.6		P23833	3402.2	3513.5
P23641	34551	37771.3		P23900	138929	132413
P23642	6651	6488		P24000	809.1	772.4
P23643	1151.7	1154.9		P24004	7661.4	8275.2
P23644	26049.6	26492.1		P24031	109.1	138.6
P23724	25750.7	26969		P24276	2713.3	2505.2
P23748	199.4	214.9		P24279	5042.2	4697.4
P23776	25586.3	28672.7		P24280	565.7	492.6
P23796	2265.1	2519.1		P24309	357462	360785
P23797	2075.5	2090.3		P24384	11301.6	10657.1
P23833	3146.5	3355.9		P24482	3694.3	3672.3
P23900	104.4	89.1		P24521	2359.3	2237.5
P24000	15067.8	14397.9		P24583	822.3	800.6
P24004	2623	2673.1		P24720	9085	8924.3
P24031	25110.4	25306.5		P24783	42.7	41.7
P24276	5954.9	6042.5		P24784	23049.4	24180.4
P24279	10727.5	10697.7		P24813	1439.8	1404
P24280	46725.5	49866.5		P24814	3355.1	3379.7
P24309	234	250.1		P24867	83545	84770.7
P24384	2167.1	2296.1		P24868	285317	277258
P24482	2174.9	2186.1		P24869	18420.7	17613
P24521	15923.3	15813.3		P24870	48997.5	50293.8
P24583	6333.5	6392.7		P24871	127285	127671
P24720	1316.8	1413.7		P25037	2261.8	2291.5
P24783	56737.9	54049.2		P25038	3087.6	2756.5
P24784	1181.1	1327.5		P25039	928.8	816.3
P24813	4314.2	4010.5		P25040	858.6	891
P24814	1554.1	1570.8		P25042	6357.1	6274.2
P24867	72.2	65.2		P25043	522.3	516.9
P24868	166.3	178.8		P25044	853	743.8
P24869	329.5	332.3		P25045	900.9	861.5
P24870	58.2	59.3		P25046	10943.6	10932.2
P24871	104.8	96.4		P25087	153	163.9
P25037	14525.5	13788.3		P25270	18736.2	19268.3
P25038	2582.6	2822.3		P25293	2642.8	2482
P25039	27564.3	31130.5		P25294	93.4	96.2
P25040	13741	14156.3		P25296	810.6	724
P25042	476	473.3		P25297	16241.1	15318.9
P25043	21181.7	21572		P25298	10579	10278
P25044	1867.1	1864.9		P25299	162480	158786
P25045	11855.2	12260.5		P25302	13617.1	12607.2
P25046	478.3	587.8		P25303	569.6	578.5
P25087	80084.6	83916.8		P25332	23.8	21.1
P25270	1324.4	1408		P25333	31558.1	30819.1
P25293	21533.4	21981.3		P25334	33510.2	31996.4
P25294	65076.9	66618.6		P25336	6262.3	6465.8
P25296	11361.8	11967.4		P25337	7238.6	6846.3
P25297	3807.3	4388		P25338	11688	11285.2
P25298	4458.7	4712.1		P25339	1140.4	1157.9
P25299	1327	1141		P25340	239.9	273.3
P25302	1569.5	1696.7		P25342	1072.6	910
P25303	7802	8030.5		P25343	427.2	446.8
P25332	30789.7	35997.5		P25344	4574.4	4232.7
P25333	208.8	224.9		P25345	5504.7	5164.1
P25334	1018.5	838.4		P25346	53906.1	53776.3
P25336	2108.4	2181.9		P25348	6707.9	6599.8
P25337	2032.9	1930.8		P25349	1309.6	1196.2
P25338	1402.6	1466.3		P25351	20661.5	19068.6
P25339	8993.3	8939.1		P25353	86856.3	101034
P25340	9247.6	8916.8		P25355	7521.7	7054.3
P25342	35150	33814.7		P25356	111119	103376
P25343	51904.6	49769.3		P25357	6774.8	6251
P25344	2142.5	2367.2		P25358	39986.7	36797.3
P25345	1401.9	1741		P25359	1174.8	1207.8
P25346	91.7	105.9		P25360	5797.5	5926
P25348	5108.7	5264.9		P25361	6993.3	7025
P25349	37026	38706.5		P25364	31279.7	31408.7
P25351	1069.9	1088.9		P25365	371.6	307.6
P25353	2928.2	2797.9		P25366	3710.4	3384.4
P25355	13403.3	14389.2		P25367	2030.4	1969
P25356	3150.6	3397.2		P25368	498.5	472
P25357	1160.3	1195.2		P25369	1902.9	2226.9
P25358	6594.9	5877.5		P25370	16129	13872
P25359	15288.6	15514.7		P25371	527.9	545.4
P25360	1658.2	1631.9		P25372	972.3	967
P25361	1171.8	1154.5		P25373	290.8	275
P25364	227.4	222.7		P25374	225.8	214.4
P25365	7968.5	7554.1		P25375	147.1	139.4
P25366	1964.4	2119.8		P25376	4561.1	4563.3
P25367	11056	10933.5		P25378	5296.7	4961.2
P25368	12544.9	12127.3		P25379	1388.8	1383.8
P25369	11051.4	11685.2		P25382	397.2	340.7
P25370	963.7	954.3		P25384	413.1	422.1
P25371	11704.6	11005.5		P25385	7095	7417.8
P25372	11214.3	13074.6		P25386	272.6	271.4
P25373	29071.1	32711.2		P25389	1976.9	1871.8
P25374	22480.1	22805.1		P25390	111613	109624
P25375	45325.4	49143.3		P25441	4661.8	4366.3
P25376	6078.7	5065.9		P25443	45.7	49.8
P25378	5578.4	5916.2		P25451	136.6	163.8
P25379	8165.9	8638.1		P25454	2936.7	3038
P25382	34310	32392		P25491	513.4	559.9
P25384	17280.1	19801.7		P25502	3096.2	3052.1
P25385	3407.8	3534.8		P25515	6929.1	6202.2
P25386	14451	14847.4		P25554	22880.5	21958.4
P25389	4664.5	4665.8		P25555	226.8	244.3
P25390	47.2	51.6		P25558	113.7	115.2
P25441	7331.6	7307.5		P25559	9025.2	8550.6
P25443	130258	119368		P25560	985.7	914.7
P25451	22500	20182.2		P25566	1474.1	1356.8
P25454	3117	3198.3		P25567	359.2	349
P25491	87182.3	85454.3		P25568	4507.9	4397
P25502	518.1	487.9		P25569	6229.6	5162.4
P25515	1708	1611.8		P25572	14991.2	15289.6
P25554	924.5	885.9		P25573	13145.6	13196.5
P25555	21745.9	22154.5		P25574	445.7	380.5
P25558	9696.8	9681.5		P25576	3557.4	2486.3
P25559	1682.9	1806.7		P25577	5552.5	4798.1
P25560	6828.1	6250.3		P25578	3985.3	3340.9
P25566	5553.4	6475.3		P25579	61234.5	61346.8
P25567	31480.2	30003.2		P25580	1982.8	2020.6
P25568	1036.2	1042.9		P25582	230.5	244.1
P25569	3258.8	3448.8		P25584	20409.2	19273.4
P25572	1439.6	1308		P25586	370.7	316.5
P25573	3219.7	3422.1		P25587	25947.3	25003.8
P25574	27726.5	26637.3		P25588	3354.3	3425.3
P25576	3368.8	3735.7		P25591	64556.7	63782.6
P25577	792.5	839.7		P25604	278.5	260.9
P25578	537.8	540.3		P25605	115.2	110.3
P25579	768.1	842.6		P25608	166938	168608
P25580	3512.7	3450.7		P25611	44194.8	43886.5
P25582	29895	27907.4		P25616	44680.3	43457.7
P25584	79.8	109.6		P25617	674.9	632.1
P25586	32575.2	31675.8		P25618	1601.7	1567.2
P25587	33.9	39.8		P25619	37295.6	37061.9
P25588	2381.8	2549.3		P25621	23887	23266.5
P25591	89.4	80.4		P25623	6938.1	6556.7
P25604	1417.8	1450.5		P25626	8216.9	7498.9
P25605	39041.8	38220.7		P25627	4539.3	4424.8
P25608	55.3	80.8		P25628	3939.1	3902.1
P25611	267.3	259.8		P25631	2847	2865.8
P25616	6107.5	6013		P25632	5478.8	5521.6
P25617	20511.7	21239.2		P25635	337.8	336.7
P25618	13012.6	12227.6		P25637	3827.5	3784.6
P25619	478.7	547.1		P25638	1519.7	1478.3
P25621	372.7	326		P25639	3863.5	3893.3
P25623	43747.9	46367		P25641	15269.9	15482.7
P25626	7106.8	7738.8		P25642	1694.3	1687.7
P25627	3201	3216.5		P25644	178.3	174.9
P25628	1398	1303.2		P25646	77449.3	78927.9
P25631	20506.7	22719.4		P25648	46277.2	46972.4
P25632	11521.2	12282.5		P25649	22527.2	21144.3
P25635	29143.7	27365.8		P25651	4586	4664.3
P25637	1403.7	1451		P25654	3871.7	3847.5
P25638	4994.8	5291.1		P25655	264.9	283.7
P25639	2052.7	1883.4		P25656	10333.2	10485.3
P25641	747.7	750.1		P25659	8981.3	8403.9
P25642	7521.5	8389.3		P25719	189.8	171.4
P25644	38899.4	38451.4		P25808	2388.7	2305.1
P25646	151.7	219.8		P25846	75688.6	76083.1
P25648	303.3	339.9		P25847	12700.3	12695.8
P25649	405.1	472.9		P26263	33248.3	34512.9
P25651	2507.3	2593.7		P26321	626.3	914.6
P25654	16258.4	18934.5		P26364	2049.4	2012.2
P25655	26385.6	26483.7		P26370	19496.9	20613.8
P25656	3000.1	2827.2		P26448	7623	7655.2
P25659	2792.9	3009.4		P26449	6390.9	6687.9
P25694	126083	124148		P26570	578	523.9
P25719	80204.3	83095.3		P26637	40.7	42.5
P25808	5376.2	5560.8		P26725	76681.3	77209.1
P25846	520.1	614		P26754	2042.9	1973.5
P25847	14002.3	14515.5		P26755	5389.7	4944
P26263	471.6	501.4		P26783	62.7	50
P26321	116032	114515		P26784	109.3	99.6
P26364	4119.7	2860.1		P26785	168.6	156.9
P26370	418.1	469.7		P26786	82.4	66.4
P26448	436.9	455.4		P26793	1392	1367.5
P26449	2248.4	2310.3		P27344	2272.9	1979.3
P26570	10950.2	11663.4		P27351	6903.1	6688.9
P26637	186419	175251		P27466	8950.9	8757.7
P26725	240	294.5		P27472	8511.5	9787
P26754	5927	6493.3		P27476	160.2	130.6
P26755	4022.1	4210.8		P27514	1360.7	1311
P26783	202515	199675		P27515	7777.3	8211.9
P26784	204775	190897		P27614	4374	3992.4
P26785	85867.9	82075.7		P27616	340.8	254.9
P26786	66081.3	58408.1		P27636	191408	172221
P26793	10143.7	10344.1		P27637	2355.4	2475.1
P27344	2208.7	2242.6		P27680	20963.1	18365.3
P27351	2774.7	2849.3		P27692	463.9	397.6
P27466	2884.6	2999.1		P27697	1082.6	1071.9
P27472	20883.6	22970.6		P27705	17295.1	17639.3
P27476	69803.3	68084.4		P27796	16292.7	15771.3
P27514	10189	9806.2		P27801	5084.1	4784.3
P27515	3009.4	2982.8		P27809	411.2	372.1
P27614	22148.5	22818.9		P27810	740.6	671.2
P27616	38170.4	36528.1		P27825	5034.6	5029
P27636	796.6	780.8		P27882	4241.3	3816.1
P27637	6503	6937.1		P27895	14709.4	13765.8
P27680	516.5	588.4		P27929	644.8	614.3
P27692	44748.8	44348.6		P27999	2363.5	1970.2
P27697	3068.2	3355.2		P28000	352.3	350.2
P27705	1365.6	1504.4		P28004	162686	152516
P27796	150.5	191.8		P28005	27365.3	31994.8
P27801	4590.2	4686		P28007	580.4	559.8
P27809	29912.5	27970.6		P28239	473.8	464.2
P27810	13886.7	13503.3		P28240	30416.3	28639.4
P27825	1226.2	1245.6		P28241	416.7	424
P27882	4222.8	4243.7		P28263	7335.4	7423
P27895	860.5	890.5		P28272	867.2	735.1
P27929	17777.2	19200.6		P28273	1521.8	1465.5
P27999	4530	4963.7		P28274	299.7	305.8
P28000	18309.4	21424		P28319	3163.9	3647.3
P28004	552.7	568.7		P28320	7986	8387.7
P28005	2849	2807.9		P28321	3506.4	3272.6
P28007	25164.5	18940.1		P28495	1104.9	883.3
P28239	4573.3	5065.1		P28496	7289.3	7766.3
P28240	391.9	475.7		P28625	5253.5	5382
P28241	53445.5	58118.7		P28627	101674	98086.1
P28263	2431.8	2575.5		P28707	203.7	173.8
P28272	34473.7	35194.8		P28708	7174.1	7182.3
P28273	15049.4	15672.1		P28737	3434.8	3299.4
P28274	68516.1	65457.8		P28742	5790.6	6174.4
P28319	14359.7	16245.4		P28743	16060.1	16115
P28320	2596.7	2495.9		P28777	671.5	711.7
P28321	10801.1	11000.2		P28778	75880.4	77835.1
P28495	19379.8	20174.7		P28789	1040.7	1061.8
P28496	2140.4	2163.6		P28791	6939.3	6541.7
P28625	3985.7	4274.2		P28795	6171.9	5831.4
P28627	128.4	131.5		P28817	2777.1	2921
P28707	36032.6	36627.6		P28834	204.6	200.6
P28708	2699.8	2859.2		P29029	2120	2038.3
P28737	3268.8	3581.3		P29055	7988.4	7682
P28742	48.5	55.8		P29056	17003.7	14900.9
P28743	1191.3	1220.6		P29295	4239.6	4175.9
P28777	40442.6	39659.1		P29311	265.5	195.9
P28778	560.9	598.9		P29340	26235.8	27801.8
P28789	4781.7	4966.2		P29366	1169.9	1123.7
P28791	1665.1	1717.5		P29453	385.2	398.3
P28795	1189.2	956.5		P29461	13592.1	13700.9
P28817	6527.6	7058.4		P29465	14619.7	15635.3
P28834	38148.8	41226		P29468	3064.6	3171.4
P29029	12667.3	15058.7		P29469	3051.6	2970.2
P29055	2089.3	2236.5		P29478	1411.9	1373.3
P29056	872.3	907.3		P29496	1084.9	1042
P29295	2913.1	3091.5		P29509	343.6	347.9
P29311	211672	227080		P29539	12464.2	12355.7
P29340	677	703.9		P29547	84.1	70.5
P29366	10055.1	9491.2		P29703	13276.4	11239.9
P29453	58357.9	55512.3		P29704	345.5	363.8
P29461	305.1	319.4		P29952	641.3	654.5
P29465	6406.2	6866.7		P30283	753640	770276
P29468	8818.3	9096.6		P30402	83315.5	84676.6
P29469	13464	13907.9		P30605	2977.3	2622.4
P29478	20096.4	19159		P30606	69674.6	67892.1
P29496	13027	13171		P30619	2988.8	2903.9
P29509	45640	44490.8		P30624	201.4	169.1
P29539	4043.6	3912.5		P30656	1579.2	1918.2
P29547	46430.4	44992.4		P30657	912.4	977.8
P29703	3757.7	3929.3		P30665	1549.2	1637.7
P29704	39312.4	37068.7		P30771	435.7	322.3
P29952	56208.7	56237.8		P30775	184424	191162
P30283	62.5	54.8		P30777	112751	111395
P30402	889.3	963.1		P30822	97.6	86.2
P30605	3389	3235.2		P30902	472.8	517.9
P30606	127.8	130.9		P30952	4539.6	4452.4
P30619	5846.4	6104.9		P31109	9294.4	9403.2
P30624	90641.2	95224.7		P31115	8390.9	8037.5
P30656	12909.1	13059.7		P31116	210.8	193.2
P30657	15325.9	15711.2		P31244	45782.1	43075.4
P30665	17313.3	17995		P31334	1998	1888.7
P30771	19121.7	18908.9		P31373	46.4	38.6
P30775	755	832.1		P31374	1893.9	1622.3
P30777	92.5	86.5		P31376	20687.7	21371.2
P30822	39358.7	40920.6		P31377	24595.5	24417.4
P30902	30887.5	34123.6		P31378	18704.4	18816.8
P30952	1911.1	2060.5		P31380	396.4	380.1
P31109	1078.8	1104.7		P31381	12162.1	12101.9
P31115	2839.3	2923		P31382	331.5	283.8
P31116	91179.5	82806.6		P31383	217.3	155.5
P31244	608.1	624.4		P31384	1896.7	1721.9
P31334	1889.7	2045.9		P31385	29633.3	27043.4
P31373	89056.9	81541		P31386	31412.7	31124.2
P31374	6324.5	6538.7		P31412	912.8	875.1
P31376	500.7	539.3		P31539	235.1	233.3
P31377	1553.7	1531.8		P31688	365.1	370.6
P31378	1156.9	1253.6		P31755	3900.3	3604.3
P31380	12620.9	13037.6		P31787	2331.3	2328.4
P31381	648.7	609.4		P32047	3787.4	3592
P31382	18760.9	17224.9		P32048	39442.6	33385
P31383	31964.9	30063.2		P32074	13.3	9.9
P31384	12378	13024.7		P32179	884.9	887.8
P31385	2182.4	2324.6		P32190	10291.2	9953.1
P31386	467.8	534.9		P32191	1362.6	1333
P31412	32612	32675.2		P32259	1292	1217.2
P31539	192813	204031		P32263	453.2	387
P31688	47909.7	51322.1		P32264	1598.4	1505.9
P31755	1597.9	1587.6		P32266	1510	1396.1
P31787	23507.3	32387		P32288	117.7	160.9
P32047	3104.2	3338.6		P32316	911.3	942.8
P32048	782.5	897.3		P32317	2066.5	2173
P32074	47507.3	48309.8		P32319	1487.7	1519.6
P32178	33255.1	31290.8		P32324	34.7	56.4
P32179	13256.5	12366.3		P32325	27938.6	25929.3
P32190	291.8	322		P32327	171.3	145.1
P32191	8094.8	9454.5		P32328	2761.8	2774.2
P32259	3811.3	3979.9		P32329	31868.7	33379.3
P32263	32419.5	30892.2		P32330	31764.8	31392.3
P32264	16489.4	17008.1		P32331	807.3	819.3
P32266	10760.9	11409.3		P32332	1961.2	2082
P32288	54953.3	49564		P32333	1629.3	1668.2
P32316	9140.2	10407.3		P32334	116456	112651
P32317	5384.3	5747.8		P32335	3496.7	3393.2
P32319	17873.4	17123.3		P32336	45373.7	40097.8
P32324	527948	518788		P32337	901	696.7
P32325	380.2	367.5		P32338	8811.4	8959.9
P32327	122357	115840		P32339	25311.5	22049.7
P32328	7081.4	7247.9		P32340	2779.2	2561.3
P32329	576.6	645.5		P32341	1690.3	1756
P32330	371.9	374.1		P32342	15776.3	13492
P32331	6605.6	6863.7		P32343	10139.5	9862.1
P32332	35393.5	32635.9		P32345	22573.2	24455.4
P32333	6015.5	6142.9		P32347	769.1	810.9
P32334	26.6	30.2		P32349	384.4	314.8
P32335	21500.2	22778.7		P32350	18901.5	18775.4
P32336	1541.9	1593.1		P32351	2153.7	2015.4
P32337	22145.5	22103.5		P32352	1617.6	1756.9
P32338	712.3	751.8		P32353	24.5	23.5
P32339	1567.2	1638.8		P32354	24539.6	24552.7
P32340	12300.7	14304.6		P32356	527.1	451.6
P32341	3592.9	4079.3		P32357	131545	134528
P32342	6225.4	5914.2		P32361	72010.9	73907.6
P32343	746.2	760.7		P32363	10657.8	10328.7
P32345	1817.9	1958.5		P32364	1243.3	1465.2
P32347	13744.3	14648.8		P32366	2265.8	2317.5
P32349	12331.7	12669.4		P32367	4293.9	4122.5
P32350	200.4	222.3		P32368	303.8	328.1
P32351	2414.4	2451.7		P32377	394.7	336.7
P32352	9910.6	10011.6		P32378	4426.3	4313.6
P32353	12511.7	11728.1		P32379	1547.1	1443.3
P32354	743	800.5		P32380	3029.1	2050.7
P32356	25172.1	26671.4		P32381	162.2	162.4
P32357	57.1	61		P32386	197.9	188.4
P32361	485.3	534.7		P32387	3502.6	3630
P32363	915.4	934.9		P32388	17972.6	18673.8
P32364	7458	8099.2		P32389	10526.5	10456.6
P32366	23148.9	21422.5		P32419	384.7	384.4
P32367	2771.2	2969.3		P32432	162361	160208
P32368	30564.5	30532.6		P32445	586.1	590.3
P32377	31145.1	32020.8		P32447	1075.9	1069.8
P32378	3174.2	3274.1		P32448	9.7	9.4
P32379	67624.1	73304.9		P32449	375.3	333.8
P32380	7218.6	7194.2		P32451	14825.3	13789.2
P32381	26859.6	27403.5		P32452	3070.2	2900.7
P32386	46587.9	44764.4		P32453	1034.3	1060.6
P32387	5293.7	5774.3		P32454	107.2	85.1
P32388	2818.1	2821.5		P32457	385.1	366.1
P32389	702.4	767.1		P32458	3204.7	2286.1
P32419	26913.9	27640.2		P32459	16339.5	16638.8
P32432	563.3	570.7		P32460	8965.8	8653
P32445	41114	41194.9		P32461	4057.6	4505.5
P32447	10118.4	10791.9		P32462	2478.8	2383.1
P32448	74.6	76.1		P32463	1510.1	1279.1
P32449	84480.8	79804.2		P32464	63247.4	63378.6
P32451	1809.2	1969.9		P32465	2421.4	2317.4
P32452	2792.8	2776.9		P32466	2302	2227.6
P32453	12457.3	12453.5		P32467	2798	2975.9
P32454	80527	83540.8		P32468	3235.9	3619
P32457	42107.3	42733.9		P32469	105	97.2
P32458	8216.7	8444.9		P32472	3816.9	3907.4
P32459	482.3	506.5		P32473	395.2	422.4
P32460	863.4	1063		P32474	3357	3388.8
P32461	3844	3883.7		P32476	1313.3	1397.8
P32462	5149.8	4990.4		P32477	3837.6	3363.2
P32463	27422.6	23031.3		P32478	700.3	702
P32464	156.1	187.3		P32479	172100	169513
P32465	2707.6	2344		P32480	3210.4	3188.6
P32466	6190.3	5582.4		P32481	299.9	349.4
P32467	8610.8	7980.5		P32485	1353.3	1486.5
P32468	23987	24554.4		P32486	716.9	602.4
P32469	39323.3	40661.9		P32487	1506.3	1481.3
P32471	138974	135182		P32490	10776.9	11140.3
P32472	11595.3	12904.7		P32491	28736.1	29194
P32473	26530.9	25625.1		P32492	1008.2	910.5
P32474	4352.6	4335.4		P32493	13404.4	13690.5
P32476	33794.2	31163.9		P32494	5419.4	5037.5
P32477	10416.2	11143.6		P32495	671.4	552.7
P32478	25983.4	26220.7		P32496	292.8	286.6
P32479	491.9	511.5		P32497	159.4	134.4
P32480	2599.7	2686.8		P32499	162.6	154.5
P32481	91327.9	84839.6		P32500	2740.6	2459.6
P32485	10288.5	10445.5		P32501	270.4	238.2
P32486	10434.9	10965.2		P32502	1121.9	1181
P32487	3517	3285.4		P32504	16366	16371.6
P32490	643.4	675.9		P32505	435.1	303.6
P32491	709.3	726.5		P32521	920.4	903.3
P32492	6213.7	6514		P32522	4138.4	3900.6
P32493	1113.4	1286.9		P32523	831.4	795.1
P32494	3146.7	3284		P32524	4062.7	3726.4
P32495	19182.4	17991.2		P32525	2445.6	2286
P32496	33799	37453.9		P32527	511	479.5
P32497	76584.9	71637.3		P32528	1870.1	1814.5
P32499	36912.9	36332.8		P32529	4397.9	4738.4
P32500	5875.9	5725.6		P32558	2778.9	3165.6
P32501	24272.5	24348.4		P32561	5010.1	3987.8
P32502	22705.9	22455.7		P32562	8966.1	8457.5
P32504	2584.9	2632.3		P32563	243.9	213.1
P32505	17095.4	17043.5		P32564	473.1	462
P32521	27738.8	28531.6		P32565	166.8	196.9
P32522	351.7	377.6		P32566	514.4	544
P32523	7574.3	8119.1		P32567	11731	11276.2
P32524	2104.6	2324.8		P32568	158.5	172.8
P32525	5314.1	5289		P32569	4078.6	4027.6
P32527	77450.3	67829		P32570	5101	5053.8
P32528	18306.6	16955.2		P32571	6681.8	6202.1
P32529	14180.9	15247.2		P32573	23245.4	23658.8
P32558	59331.7	59195.5		P32578	13343.3	12924.2
P32561	4794.8	4875.6		P32579	3498	3605.3
P32562	1198.6	1271.6		P32580	22669.3	22968.8
P32563	49643.2	45006.6		P32582	85.7	98.9
P32564	10148.3	10058		P32583	772.2	670
P32565	106866	108217		P32585	21172.2	20073.9
P32566	21837.7	23591.3		P32588	346.8	329.6
P32567	1906.7	2019.8		P32589	65.3	41.5
P32568	25846	25871		P32590	434.6	426.3
P32569	2314.4	2422.7		P32591	1297.2	1218.6
P32570	1857.4	2255		P32597	1262.5	1247.4
P32571	1035.4	1112.9		P32599	120	69.8
P32573	330.6	411.3		P32600	5558.5	5725
P32578	494.5	498		P32601	2886.6	2748.7
P32579	6081.3	6193.3		P32602	3239.7	3136.4
P32580	1779.8	1929.3		P32604	3973.2	4153.7
P32582	195656	183022		P32605	19264.9	18846.5
P32583	12158	11532.3		P32606	19293.5	19318.5
P32585	1090.7	1115.8		P32607	4159.3	3901.2
P32588	32400	28536.1		P32608	160.4	153.1
P32589	218230	220501		P32609	44221.2	43708.7
P32590	12950.9	14711.4		P32610	294.8	314.5
P32591	9408.6	9116.1		P32611	1224.3	1198.4
P32597	23262.3	23191.7		P32613	8235.6	8261.7
P32598	21832.8	22973.9		P32614	395.1	363.6
P32599	70264.5	69610.6		P32617	1030.7	1041.7
P32600	2670.7	2776.4		P32618	42209.1	41912.2
P32601	1282.6	1377.9		P32621	1815.3	1716.7
P32602	16257.8	16601.3		P32623	3029.9	2780
P32604	4883	5400.7		P32626	1825.8	1826.8
P32605	305.1	295.1		P32628	107.6	110.9
P32606	2063.9	2286		P32629	9265.4	9827.7
P32607	1605.2	1608.5		P32634	11696.6	11550.6
P32608	20676.3	20503.4		P32639	1015.5	1017.2
P32609	334.9	337.3		P32641	22097.9	21862.7
P32610	24129.7	22802.2		P32642	5004.3	4776.1
P32611	7247.7	7896.8		P32643	808.8	775.3
P32613	1390.9	1163.1		P32644	3277.9	3144.7
P32614	45993.8	45485.9		P32656	5483.6	5495.4
P32617	3398.5	3632.4		P32657	3310.2	3238.8
P32618	499.6	702.7		P32660	1095.5	1043
P32621	12515.1	12235.8		P32767	9926	9723.1
P32623	9728.5	8034.8		P32769	3377.8	3186.6
P32626	5188.2	5259.3		P32770	3980	3704.4
P32628	23793.7	26100.9		P32771	229.7	282.6
P32629	6391.1	6652.2		P32773	2224.4	2172.6
P32634	822.2	806.9		P32774	4543.2	5023.1
P32639	11286.3	11660.3		P32775	387.4	422.9
P32641	219.7	243.9		P32776	6031.6	5682.1
P32642	13212.4	13744.7		P32781	67315.2	68544.7
P32643	8536.6	8487.1		P32783	1668.7	1813.4
P32644	7035.4	6916.8		P32784	4356.7	4267.6
P32656	1435.5	1625.9		P32785	44525.4	43328.6
P32657	7792.5	7970.7		P32786	27604.3	24902.3
P32660	10505.2	10597.9		P32787	288.8	254.4
P32767	3436.9	3563.6		P32788	22355.3	22785
P32769	9509.2	9692.8		P32789	39132.2	39075.4
P32770	4962.2	4809		P32790	625.1	683.7
P32771	24910.9	26302.7		P32791	984.7	1094
P32773	8230.3	9154.7		P32792	9431.8	9738.3
P32774	8586.7	9500.5		P32793	4430.8	4096.9
P32775	10455.8	11785		P32794	1460.9	1299.4
P32776	3898.7	4105.6		P32795	820.3	809.4
P32781	102.8	111.9		P32796	59944.9	58856.4
P32783	9536.7	10157.3		P32797	9358.9	9689.3
P32784	1901.3	2124.1		P32798	3549.4	3492.2
P32785	388.8	422		P32799	1113.9	1148.7
P32786	175	172.1		P32801	6711.1	6735.5
P32787	17387.6	17759.4		P32802	614.3	626.6
P32788	762.2	751.3		P32803	3249.1	3057
P32789	165.9	164.4		P32804	29586.5	28013.8
P32790	24993.4	24647		P32805	8601.6	8740.2
P32791	8865.7	8725.8		P32806	7199.4	6911.5
P32792	1375.8	1442.9		P32807	34772.2	33843.3
P32793	4450.1	4616.4		P32828	61916.3	67143
P32794	10670.2	10483.8		P32829	10230.5	9528.1
P32795	14150.8	15354.2		P32830	1244.6	1276.6
P32796	518	623.5		P32831	2957	2936.9
P32797	676	735.1		P32832	2960.7	2917.4
P32798	1892.8	1608.3		P32833	26246.2	26770.2
P32799	10039.1	11065.7		P32835	578.5	706.1
P32801	428.4	485.4		P32837	94796.8	98760
P32802	13063.4	12926.2		P32838	17299.4	17927
P32803	3481.4	3611.9		P32839	5813.1	5799.7
P32804	305.1	329.4		P32842	31217.5	30204.9
P32805	1634.5	1530.6		P32843	716.9	801
P32806	1344.9	1369.2		P32844	1810	1923
P32807	378.4	397.3		P32849	7430.4	7246
P32828	317.8	270.2		P32854	108464	111710
P32829	1143.3	1177.6		P32855	1247.2	1254.5
P32830	3747	4304.8		P32857	2509	2545.4
P32831	2382	2546.5		P32860	2044.1	1937.2
P32832	11930.6	12039.8		P32861	83.4	71.5
P32833	528.4	591.7		P32862	10509.9	10585.5
P32835	52004.7	54169.3		P32863	74432.2	74975.1
P32837	133.5	131.2		P32864	4853.3	4050.7
P32838	206.3	236.3		P32867	3574	4194.1
P32839	1652.3	1839.2		P32873	1979.1	1971.7
P32842	519.3	505.3		P32874	12422.3	12790.1
P32843	12679.7	14053.8		P32875	2884.8	2780.3
P32844	4500.3	4813.9		P32891	586.7	509.4
P32849	729.8	691.9		P32892	527.3	457.8
P32854	1493.3	1558		P32893	64.1	74.1
P32855	5863.4	6030.2		P32895	3289.4	3300.2
P32857	3860.4	3867.8		P32896	1998.5	1898.8
P32860	17747	18399.2		P32897	43272	43167.2
P32861	77007.9	78426.6		P32898	1156.4	1203.1
P32862	384.7	416.4		P32899	589.9	583.6
P32863	110.5	132.1		P32900	6889.8	6922.4
P32864	13920.6	13847.4		P32901	8635.1	8973.3
P32867	2724.4	2925		P32902	2290.9	1702.5
P32873	4690.3	4692.5		P32904	1361.2	1386.6
P32874	965.6	1107.6		P32905	229.4	179.6
P32875	4695	4715.9		P32906	2726.3	2600.4
P32891	9825.4	10930.3		P32908	11240	11814.1
P32892	25120.3	25099.8		P32909	1234.9	1186.1
P32893	654	635.6		P32910	5318.2	5136.4
P32895	22419.6	22555.3		P32911	1139.7	1202.4
P32896	4021.7	3854.5		P32912	2660.7	2596
P32897	678.9	739.4		P32913	1194.8	1154.6
P32898	16849.1	17792.1		P32914	1521.4	1516.6
P32899	9287	9115.1		P32915	501.7	491.9
P32900	1372.4	1386.3		P32916	2133.5	2338
P32901	9106.4	8491.2		P32917	4815.2	4873.4
P32902	9045.9	9724.2		P32939	485.5	460.1
P32904	4839.2	5192.9		P32945	28278	27484.5
P32905	98826.3	90006.9		P33122	26753.8	26624.2
P32906	2009.5	2113.6		P33201	188.6	208.5
P32908	13677.2	13922.2		P33202	673.7	600.2
P32909	9413.7	9755.6		P33203	1890	1965.1
P32910	6113.4	6119.1		P33204	876.4	888.4
P32911	10060.9	10011.5		P33296	101759	102635
P32912	2263.8	2481.9		P33297	522.2	445.4
P32913	9017.2	9340.9		P33298	10316.5	9881.8
P32914	2001.2	2131.7		P33299	438.3	418.6
P32915	19111.8	18359.6		P33300	14918	12947.4
P32916	9845.9	10431.9		P33301	35230.8	34526.8
P32917	2058.2	2088.5		P33302	36.4	40.4
P32939	17482.7	16051.4		P33303	120743	101460
P32945	344	329.8		P33306	40948.7	41080.8
P33122	76.1	94.8		P33307	4043.4	3644
P33201	48575.6	42839.8		P33308	5653.9	5469.6
P33202	8097.5	8528.5		P33309	3974.1	3977.4
P33203	3015.5	3132.8		P33310	13098.9	13214.4
P33204	9335.2	9547.7		P33311	1332.7	1236.1
P33296	1630.8	1624.4		P33312	52257	53341.9
P33297	38813.2	39548.2		P33313	1525.3	1285.5
P33298	24007.5	23890.5		P33314	2547.6	2304.3
P33299	51351.9	52165.2		P33315	160595	158924
P33300	745.2	728.2		P33317	2392.8	2390.2
P33301	340.5	359.9		P33322	352.7	335.7
P33302	35070.6	35362.6		P33324	10543.1	11897
P33303	167.2	211		P33327	357.8	303.3
P33306	293	300.9		P33328	1548.6	1548.4
P33307	12947.9	13215.5		P33329	29827.3	29549.4
P33308	1972.1	2065.2		P33330	865.7	831.6
P33309	9985.6	10362		P33331	329.4	245.7
P33310	1648	1806.6		P33332	2634	2721.5
P33311	3452.4	3689.9		P33333	744	705.7
P33312	536.4	514		P33334	90284.3	87059.2
P33313	17449.6	17518.6		P33336	28084.4	25289.8
P33314	3529	3606.1		P33338	4207.5	4143.7
P33315	1678.9	1811.4		P33339	2147.1	2019.8
P33317	20507.4	18053.5		P33399	3732.4	3436.8
P33322	54905.2	51561.9		P33401	791	736.5
P33324	2844.5	2930.7		P33411	1343.2	1319.9
P33327	17909.9	20533.1		P33412	2101.1	2116.7
P33328	5576.4	5744.3		P33416	194.4	143.4
P33329	653	711.1		P33417	3208.2	3018.6
P33330	39989.6	38015.9		P33418	3315.7	3251.4
P33331	21321.4	25862.6		P33419	9398.2	9307.7
P33332	7267.8	7562.4		P33420	637730	618977
P33333	16546.4	15275.4		P33421	7942.7	7802.7
P33334	4753.9	4924.5		P33441	3344.9	3280
P33336	539.4	595.4		P33442	629.7	668.7
P33338	24540.2	24413.2		P33550	161485	166098
P33339	2622.6	2805.4		P33734	182.4	195.2
P33399	29418.2	28682.5		P33748	6936.6	6453.3
P33401	12451.9	13045.1		P33749	1165.1	1187.1
P33411	1001.1	1020.4		P33750	1230.9	1240.3
P33412	3799.2	3757.9		P33751	11939.1	12361.6
P33416	59593.7	62770.6		P33753	1067.2	1015.6
P33417	3132.7	3182.2		P33754	1037.4	1051.2
P33418	2827.4	2993.6		P33755	3530.7	3526.4
P33419	551.4	607.8		P33759	1277.8	1243.4
P33420	19	20		P33760	3793.8	3616.7
P33421	2759	3049.3		P33767	126.6	95.6
P33441	13055.2	13679.7		P33775	916.2	726.2
P33442	43824.1	37425.5		P33891	1738.9	1716.4
P33550	48.8	59.8		P33892	195.3	211.3
P33734	39877.9	40502.4		P33893	5258.4	5007.3
P33748	1508.7	1552.7		P33894	2626.1	2699.1
P33749	3379.4	3756.8		P33895	11792.7	11783.7
P33750	16799.7	16885.2		P34072	8699.8	8531.1
P33751	1372.7	1379.1		P34077	2129.3	1962.8
P33753	11116.4	11124.1		P34078	2656.5	2287.7
P33754	12206.8	12055.8		P34087	610.7	411.1
P33755	11293.8	11893.7		P34110	657.8	601.1
P33759	8871.9	9722.6		P34111	12071.4	11713.7
P33760	2344	2465.7		P34160	238.4	217.5
P33767	27723.8	24836.6		P34161	25651.2	24725.3
P33775	16408.5	15870.4		P34162	2992	3493.3
P33891	6135.1	6678.5		P34163	1486.5	1771.2
P33892	132277	130971		P34164	3475.2	3499.9
P33893	829.9	841.5		P34165	1179.2	999.7
P33894	2754.7	2763		P34167	1070.6	972.8
P33895	1926.7	2065.1		P34216	348.4	354.2
P34072	1186	1322.5		P34217	1318.1	1240
P34077	20799.8	21203.2		P34218	29388.2	28868.2
P34078	13294.2	13863.9		P34219	4919.5	5520.6
P34087	2068.4	2177.4		P34220	1235.2	1120.9
P34110	7758.1	7743		P34221	6058.1	5428.3
P34111	2880.3	2982.2		P34222	818	629.3
P34160	27864.9	28736.9		P34223	1280.2	1329.3
P34161	170.3	175		P34225	101340	108035
P34162	2524.6	2859.1		P34226	6920.2	6682.4
P34163	3861.7	3855.6		P34227	498.2	492.8
P34164	3088.9	3448.5		P34228	41075.8	41095.8
P34165	1056	1158.4		P34232	1343.9	1275.4
P34167	71990.5	69247.3		P34233	6915.5	7019.3
P34216	40173.7	41571.7		P34234	27289.6	30763.2
P34217	4676.1	4873		P34237	627.8	645.1
P34218	532.3	580.8		P34239	6928.4	6635.7
P34219	2746.2	2873.5		P34240	6574.1	6957.2
P34220	7024.5	7799.5		P34241	115.9	102.5
P34221	7880.5	7926.1		P34243	5011	4836.9
P34222	7839.8	7780.9		P34244	1556.6	1585.4
P34223	32527.1	33642.4		P34246	9519.8	9272.5
P34225	371.1	383.1		P34247	2983.8	2747
P34226	4364.2	4665		P34248	5535.3	5263.8
P34227	11330.1	14116.3		P34250	15422.6	14192.1
P34228	535.2	640		P34251	38689.8	39414.3
P34232	4022.7	4185.9		P34252	16073.4	15968.8
P34233	705.7	745.3		P34253	575.1	593.1
P34234	533.6	567		P34730	1550	1471.3
P34237	16392.7	16569.5		P34756	5327.8	4908.9
P34239	558.5	589		P34758	37324.7	38867.7
P34240	1235.6	1206.8		P34761	2963.8	3088.7
P34241	19537.1	19620.6		P34909	2314.1	2354.3
P34243	1615.7	1723.7		P35056	10820.4	10649.1
P34244	6892.4	6743.6		P35127	4068.6	4012.9
P34246	1195.3	1254.6		P35169	17661.3	16657.5
P34247	5553.8	5373		P35172	15637.7	15014.3
P34248	5311.2	5062.7		P35176	1122.5	1147.3
P34250	1082.9	1139.8		P35177	1804.7	1780.3
P34251	84.5	100.2		P35178	2653.9	2522.6
P34252	672.6	693.8		P35179	1758.6	1756.5
P34253	10779.3	11042.5		P35180	1653.7	1785
P34730	19642.9	20505.7		P35181	12484.5	12486.9
P34756	1379	1548.9		P35182	8797.9	8914.6
P34758	149.4	181.4		P35183	3141.3	3229.7
P34760	66154.9	64823.8		P35184	559.7	642
P34761	4369.3	4440		P35187	80679.3	83110.2
P34909	8099.9	8354.9		P35189	550.2	435.2
P35056	1635.3	1674.6		P35191	1484.3	1382.4
P35127	1130.7	1292.2		P35192	61084.1	61496.7
P35169	3902.3	4053.2		P35193	2825.8	2485.9
P35172	958.5	967.1		P35194	358.3	345.8
P35176	17810.3	18570.7		P35196	2551	2660.4
P35177	4349	4368		P35197	3409.9	3517.2
P35178	14817.3	15010.5		P35201	16850.2	16728.6
P35179	10072.8	8738		P35202	11471.5	11227.9
P35180	13198.4	13582.5		P35203	475556	489590
P35181	1610.6	1663.1		P35206	36030.7	36155.9
P35182	2370	2456.7		P35207	1744	1781.4
P35183	1688	1825.1		P35208	91959	91148.7
P35184	25125.6	22750.9		P35210	161821	170365
P35187	177.3	202.3		P35688	20344	21874.2
P35189	14118	15301.1		P35691	37.2	35.3
P35191	15555.4	16513		P35718	766.3	708.1
P35192	82.8	88.2		P35719	555.3	512
P35193	4289.8	4672.7		P35723	1658.3	1532.4
P35194	25258.5	26703.8		P35724	7818.6	7434.6
P35196	2916.9	2687		P35725	1826.2	1707.4
P35197	31308.6	32255.2		P35727	4838.7	4364.2
P35201	296.6	313.3		P35728	14001.4	13246.9
P35202	2326.2	2469.1		P35729	11118.4	10534.2
P35203	81.7	83.2		P35731	180094	181350
P35206	704.1	631.4		P35732	104.9	95.1
P35207	19779.7	20897.5		P35734	12474.7	12426.1
P35208	139.6	135.5		P35735	7073.2	7556
P35210	760.9	773.5		P35817	1373.4	1191.6
P35688	1254.9	1311.4		P35844	134.4	163.4
P35691	138045	162491		P35845	4503.9	4201.1
P35718	12610.8	12410.2		P35996	1777.2	1633.8
P35719	59918.1	68925.5		P35999	11019.8	11498.2
P35723	15201.4	15174.4		P36000	564.3	632.2
P35724	2075.5	2335.1		P36002	12061	11528.2
P35725	6368.7	6296.5		P36004	5898.8	6358.7
P35727	1760.8	1944.9		P36005	5953.9	5899.5
P35728	3288.9	3318.9		P36006	10754.7	10249.4
P35729	9817.4	10619.5		P36007	4227.7	4298
P35731	45	37.1		P36009	1860.4	1809.1
P35732	36683.1	36642		P36010	1178.6	1032.7
P35734	740.8	841.4		P36012	39791.1	41271
P35735	1223.1	1117.1		P36013	227.1	205.3
P35817	7642.5	7568.2		P36014	48504.8	49469
P35844	64505.6	64053.3		P36015	916.8	1059.5
P35845	7553.3	8048.3		P36016	390.2	395.7
P35996	4489.7	4977.4		P36017	426.4	437.1
P35999	1154.1	1276.6		P36018	175.4	142.9
P36000	9531.2	9885.2		P36019	120913	118491
P36002	240	222.5		P36022	110933	109235
P36004	1220.1	1297.2		P36023	8677.4	7963.5
P36005	1801.3	2048.4		P36024	1723.4	1812.6
P36006	7124.6	7520.9		P36027	3104.2	2810.7
P36007	3007.7	3073.8		P36029	36952.8	32683.3
P36008	157937	143735		P36036	2731.6	2770.6
P36009	4528.1	4752.9		P36037	200.5	242.6
P36010	18483.8	19289.6		P36038	131488	134738
P36012	663.2	589		P36039	6089	6326.4
P36013	29835.1	27859.8		P36040	1444.7	1317.3
P36014	201.3	199		P36041	9330.2	9031.3
P36015	25949.3	26158.7		P36044	6372.2	6088.7
P36016	18816.9	19123.8		P36046	202.1	185.9
P36017	10514.1	11079.8		P36047	743.7	841.4
P36018	20130	21967		P36048	2359.3	2161.5
P36019	12.6	17.8		P36049	217.9	224.4
P36022	952.2	901.2		P36051	5870.2	6360.9
P36023	1807.2	1739.8		P36052	212099	221887
P36024	4564.8	4733.2		P36053	1135.5	1029.1
P36027	3296.2	3449.8		P36054	26220.7	26774.5
P36029	221.3	260.5		P36056	3923.6	4362.7
P36036	7944.3	8097.3		P36057	4027.7	4181.2
P36037	16249.2	17379.6		P36059	20238.8	21570
P36038	364.1	391.7		P36060	565.1	588.9
P36039	3982	4071.5		P36062	75187.5	76111.8
P36040	3084.6	3273.5		P36064	2756	2916.3
P36041	6710.4	6937.1		P36066	11135.9	11258.7
P36044	1239	1361.6		P36068	10756.5	8690.2
P36046	23737.9	24276.3		P36069	19666.3	19951.2
P36047	14406.8	15197.8		P36070	273253	283106
P36048	5864	6175.4		P36075	4961.3	4831.4
P36049	41397.3	38471.7		P36076	1381.6	1334.6
P36051	2196.8	2326.6		P36077	53676.7	51583.2
P36052	107.8	127		P36078	26448.2	25007.9
P36053	6621.3	6345.1		P36080	722.8	700.1
P36054	585	590.6		P36081	116.6	127
P36056	2228.9	2527.2		P36083	893.9	891.6
P36057	5542.1	5236		P36084	6195.2	6000.7
P36059	6780.4	7521.3		P36085	14628	14038
P36060	38292	38508.6		P36086	9788.7	10210.1
P36062	1210.9	1197.7		P36088	3939	4005.8
P36064	5422.9	5900.6		P36090	2583	2418
P36066	383.3	431.2		P36091	9620.6	9757.4
P36068	1468.9	1543.9		P36093	321825	318238
P36069	4920.7	5379.1		P36094	1093.3	1144.9
P36070	37.1	39.6		P36095	1445.6	1342
P36075	889.6	907.7		P36096	14846	15027.6
P36076	8162.1	8631.9		P36097	19215.4	19198.6
P36077	843.3	836.6		P36100	5333.1	5751.9
P36078	512.8	546.5		P36101	2753	2883.9
P36080	15546.8	14645.3		P36102	2193.2	2116.5
P36081	18220.1	18017.4		P36103	7499.2	7133.7
P36083	2726	2890.2		P36104	1612	1508.8
P36084	2451.8	2542.1		P36106	8518.2	7801.2
P36085	457.6	474.9		P36107	6670.1	6799.8
P36086	792.1	920		P36108	938.3	866.2
P36088	5630.4	5986.7		P36110	22782.4	21856.7
P36090	3512.1	3768.7		P36112	1549	1753.2
P36091	712.3	665.1		P36114	367	350.8
P36093	35.5	35.7		P36115	59846.8	60702.6
P36094	5034.3	5127.4		P36116	15123.5	13304.5
P36095	9291.8	9386.3		P36117	7332.3	7557.6
P36096	1255.4	1241.6		P36118	26715	25477.3
P36097	1328.7	1350		P36119	17765.5	17796.1
P36100	2550.2	2789.7		P36120	1037.2	978.6
P36101	9709.3	9993.1		P36121	5157.4	5002.9
P36102	6214.8	6591.1		P36122	12495.8	13348.7
P36103	2092.5	2459.6		P36123	1951.7	1933.2
P36104	8641.5	8932.8		P36124	11134.7	10755.7
P36106	1751.7	1816.6		P36125	15916.8	15260
P36107	1454.6	1302.7		P36126	9971.3	9694.9
P36108	4910.3	5019.3		P36130	22978.4	21612.2
P36110	459.6	449		P36131	10943.3	10800
P36112	22430.9	24952.8		P36132	2597.1	2406
P36114	11839.6	12243		P36135	1373.3	1275.8
P36115	125.2	135.5		P36136	378.5	329.7
P36116	1981.4	2243		P36139	158.8	139.5
P36117	2555.7	2560.4		P36141	63580	63160.2
P36118	2127.6	2130.7		P36144	2991.7	3120.4
P36119	1520.1	1568.5		P36145	1206.1	1174.7
P36120	9765.6	9888.8		P36146	19193.1	20730.6
P36121	12720.3	13398.8		P36147	898.3	887.1
P36122	5910.2	6263.6		P36148	5049.9	5381.7
P36123	4019.9	4178.6		P36149	1268.2	1299.7
P36124	1650.1	1792.5		P36150	6143.9	5973.9
P36125	269	293.3		P36151	4186.7	4095.7
P36126	2557.4	2712.1		P36152	1955.5	2043.6
P36130	623.3	614		P36154	1997.9	1701.8
P36131	2476.6	2523		P36156	682.1	604.4
P36132	5184.1	5421		P36158	1493.2	1330.2
P36135	18056.1	18550.7		P36159	3730.3	3672.9
P36136	19652.7	19753.8		P36160	4432.8	4595.1
P36139	66731.9	67370		P36161	1473.4	1533.9
P36141	702.4	886.4		P36162	2432.3	2357.5
P36144	5857.9	5872.2		P36163	2298.4	2302
P36145	6642.5	6986		P36164	13483	12466.1
P36146	1222.6	1316.6		P36165	23469.4	22585.7
P36147	5688.2	5889.7		P36166	12913.7	12404.6
P36148	4691.3	4953.3		P36167	10487.7	11102.3
P36149	6185.5	5727.6		P36168	4083.4	4039.5
P36150	1341.9	1296.2		P36169	4158.6	4414.4
P36151	3890.6	4009.8		P36224	1740.6	1783.8
P36152	15983.8	15507.8		P36421	54.7	49.3
P36154	14900	17700.3		P36516	415	387.7
P36156	4070.6	5406.3		P36517	1774.1	1576.5
P36158	970.7	1051.4		P36519	2296	1876.6
P36159	2878.9	3161		P36520	1824.4	1793.7
P36160	6416.8	6422.1		P36521	812.8	773
P36161	13108.3	13870.5		P36523	3302.2	2984.5
P36162	2229.9	2727.4		P36525	3118.1	3404.6
P36163	410.4	455.7		P36526	2443.5	2780.4
P36164	1128.7	1118.4		P36527	4896.1	4809.7
P36165	1392.7	1460.6		P36528	2056.7	1992.5
P36166	1607.6	1689		P36531	12361.1	12099
P36167	481	552.6		P36532	24654.4	23827.9
P36168	5152.8	5649.3		P36533	1914.4	1727.6
P36169	2126.4	2229		P36534	1567.7	1689.4
P36224	2515.9	2643.4		P36775	668	647.4
P36421	103295	90574.4		P36973	25409	26705.4
P36516	18679.8	20279.5		P37012	3602.7	4390.9
P36517	10018.3	10665.2		P37020	6417.3	6216.2
P36519	4374.5	4814		P37254	3159.3	1575.3
P36520	5741.5	5954.2		P37262	2039.5	2060.8
P36521	7557.5	6802.8		P37263	362	362.6
P36523	4480.4	5141.6		P37267	3693.6	3714.6
P36525	7033	7720.9		P37291	665.1	646.2
P36526	4808.5	5202.9		P37292	728.9	790.8
P36527	3088.2	3514.1		P37293	9504.4	9791
P36528	12160.5	13581.2		P37296	1866.5	1608.5
P36531	4583.8	4900.9		P37297	2151	2049.8
P36532	497.8	585.6		P37298	4178.6	4364.6
P36533	3126.2	3392.1		P37299	1442.8	1375
P36534	11040.5	12021.5		P37302	296.3	265.6
P36775	30203.2	32034.5		P37303	359.4	383.1
P36973	1621	2139.8		P37304	5102.2	5460.5
P37012	51811.5	53242.9		P37366	1438.8	1340.7
P37020	1714.7	1691.3		P37370	1954.8	1988.6
P37254	6255.1	6632.5		P37838	303.7	317.7
P37262	7156.8	7195.6		P37898	101.9	98.1
P37263	20000.1	18617.7		P38009	2283.4	2174.7
P37267	2661.2	3126.7		P38011	43.8	41.5
P37291	113541	106320		P38013	156.4	114.8
P37292	42015.8	41872.5		P38041	6283.7	6764.9
P37293	3940.2	4246.9		P38042	4510.4	4780.6
P37296	8533.9	9074.7		P38061	301.9	258.9
P37297	12230	12780.9		P38063	743.6	737.4
P37298	2476.6	2666.2		P38064	44200.2	49217.1
P37299	5850.8	7532.4		P38065	12454.3	12337.8
P37302	38551.7	39458.6		P38066	6118.4	5578.1
P37303	82117	78518.6		P38067	12913	12114.5
P37304	7785.9	8668.5		P38068	8095.5	7973.8
P37366	2741.5	2639.4		P38069	784.8	764.4
P37370	2457.4	2514.6		P38070	2199.5	2419.6
P37838	24045.1	23249.1		P38071	1157.4	1239.9
P37898	38296.4	38280.2		P38072	6029.9	5881.9
P38009	4241.5	4291.8		P38074	4241.3	4214.9
P38011	162360	157329		P38075	419.6	420.4
P38013	126948	158639		P38077	546.3	489.5
P38041	3074	3091.7		P38079	1963.6	2064.4
P38042	798.9	803.6		P38080	1405.9	1382.2
P38061	137840	128601		P38081	1570.3	1421.6
P38063	8240.8	8237.6		P38084	661.5	634.1
P38064	5707	6255.7		P38085	2943	2197.7
P38065	611.4	627.9		P38086	633.1	586.4
P38066	7240.5	7479.1		P38087	1912.2	1904.2
P38067	3592.6	3862		P38089	3995	4390.5
P38068	4468.2	4589.4		P38090	66958.6	66348.9
P38069	14276	14468.9		P38109	200.2	211.6
P38070	2536.8	2296.5		P38111	9656	10797.6
P38071	18617.8	20147.5		P38112	1748.6	1809.6
P38072	1857.2	2086		P38113	6982.1	6604.6
P38074	20850.9	20623.6		P38114	90522.2	93064.1
P38075	33014.4	30327.7		P38115	317.1	287.5
P38077	38817.1	41693.7		P38116	4017.3	4258
P38079	8663.3	6901.9		P38120	1741.6	1833.4
P38080	7842	8392.2		P38121	932.1	922.5
P38081	16831.1	18414.9		P38122	2154.8	2135
P38084	10384.5	9874.8		P38123	22925.5	22045.5
P38085	5607.7	5284.2		P38127	2841.5	2667.7
P38086	6421.3	6612.9		P38129	975.5	961.6
P38087	6071.7	6152.1		P38130	1252.6	1260
P38088	184216	175964		P38131	2691.2	2668.2
P38089	3381.4	3635.3		P38132	963	804.6
P38090	127.1	128.7		P38137	360.7	372.8
P38109	14364.9	13557.4		P38138	1449.9	1359.8
P38111	1061.7	1121.8		P38139	4247.6	4484.8
P38112	13158	14014.4		P38140	30767.1	30448.1
P38113	1917.6	1856.2		P38142	11442.6	11815.1
P38114	123.4	139.3		P38143	4367.1	5272.5
P38115	29730.2	31466.8		P38144	928.8	872.3
P38116	8860.8	9884.9		P38145	1025.3	1011.8
P38120	8127.2	8881.2		P38146	12468.2	12199.9
P38121	6849.6	7223.1		P38147	9163.7	7646.8
P38122	3918.1	3797.2		P38148	35320.1	36136.1
P38123	676.6	706.2		P38149	8714.7	10630.3
P38127	3303.7	3751.8		P38151	7264.2	6823.7
P38129	11139.5	11714.2		P38152	2175.5	2189.2
P38130	10637.6	10876.6		P38153	2717.6	2457.5
P38131	7611.1	8088.2		P38158	14966	15645.5
P38132	7778.2	7747.4		P38162	7847.2	7242.5
P38137	19431.3	20538.2		P38164	1587	1533
P38138	9612.8	10087.8		P38165	5754.9	6540.8
P38139	2884.4	3113		P38166	2768.1	2782.8
P38140	352.8	404.1		P38167	10169.1	9726.2
P38142	522.2	494.5		P38169	4551.2	4145.6
P38143	3991.5	4062		P38170	18897.4	18396.5
P38144	20116.4	20630.5		P38172	10374.6	9255.8
P38145	13144.6	14088.5		P38174	5954.5	6380.3
P38146	2199.6	2264.4		P38175	7080.7	6534.1
P38147	406.3	437.9		P38176	19947.2	19591.7
P38148	471.7	533.6		P38177	4142.5	4199.8
P38149	8051	8328.8		P38179	28879.6	26942.2
P38151	3283.3	3360.8		P38180	17379	16481.5
P38152	5691.8	5900.8		P38181	878.5	979.7
P38153	9333.6	9791.1		P38182	4855.5	4981.5
P38158	1085.5	1173		P38187	24879.2	25067.9
P38162	1666.1	1774.9		P38193	3412.4	3217.3
P38164	4886.2	4975.4		P38196	27521	27316.4
P38165	2562.1	2929.3		P38197	2198.3	2115.9
P38166	4434.1	4551.4		P38198	8769.7	8771.6
P38167	1569.9	1715.9		P38199	1719.1	1730.7
P38169	3535.1	3475.5		P38200	37221.6	36099.1
P38170	1378.6	1468		P38202	880.7	836.4
P38172	785.6	849.6		P38203	602.3	553.6
P38174	20027.7	20665.4		P38205	188.3	178
P38175	4049.9	4480.4		P38206	38146.4	38522.3
P38176	146.6	148.8		P38207	60468.9	56729.8
P38177	1840.6	1737.3		P38208	5003.8	5083.4
P38179	444.1	459.8		P38211	16289.6	16173.7
P38180	269.4	257.5		P38212	15707.9	15503.9
P38181	11241.9	11789.1		P38213	11554.8	11470
P38182	2623.1	3047.5		P38217	1241.3	1111.2
P38187	917.3	1012.9		P38218	2469.1	2314.9
P38193	2863.8	2944.1		P38219	338.7	312.8
P38196	2281.7	2100.4		P38221	1651.2	1661.9
P38197	14264.1	15657.8		P38222	3063.1	2824.8
P38198	1076.3	1149.8		P38225	3288.5	3256.4
P38199	15800.2	15833.9		P38226	1227.6	1125.4
P38200	179.5	171.1		P38227	59912	65311.6
P38202	9653	9399.9		P38228	18981.3	18859.5
P38203	9862	10028.3		P38230	9137.6	8332
P38205	54403.5	53855.2		P38234	957.8	808.9
P38206	165.1	156		P38235	747.6	707.5
P38207	181.1	196.9		P38236	5309.8	5868.8
P38208	1441.5	1559.8		P38237	1974.8	2064.5
P38211	299.6	284.2		P38238	11798.1	11810.7
P38212	620.7	624		P38239	10824.3	10992.3
P38213	841.3	962.3		P38241	1699.1	1650.8
P38217	7454.5	7453.2		P38242	23093	23664.7
P38218	6235.3	6576.3		P38243	5123.3	4675.1
P38219	112555	103578		P38244	1984.5	1968.4
P38221	11849.4	11621.1		P38247	1636.8	1626.5
P38222	2205.3	2106.8		P38248	109.5	108.3
P38225	5574.8	5304.9		P38249	147.3	121.8
P38226	1006.3	1036.9		P38250	316.3	359.8
P38227	485.4	450.5		P38251	1373.7	1416.7
P38228	881.6	974.5		P38254	2477.3	2696
P38230	4440	4556.9		P38255	21052.2	21073.2
P38234	8850.6	10321.8		P38256	832.9	736.8
P38235	8588.3	9295.8		P38260	500.5	494
P38236	1642.5	1716.5		P38261	3570.2	3540.4
P38237	8420	8701.5		P38262	2262.3	2021
P38238	3950.2	3638.2		P38263	29628.5	29929.6
P38239	938.9	1065.3		P38264	241.3	235.8
P38241	3963.5	3934.2		P38265	68086.5	73813.2
P38242	1538.2	1565.9		P38266	7115.6	6861.1
P38243	562.7	671.5		P38271	8760.3	8722.5
P38244	3671.3	3522.6		P38272	973.8	899.7
P38247	4508.5	4541.1		P38273	20511.1	21087.3
P38248	34743.6	32120.5		P38274	4760.1	4306.7
P38249	184414	178095		P38277	7435.4	7613.5
P38250	19136.3	19241.7		P38278	31657.1	30605.2
P38251	8361.2	8481.7		P38281	587.9	611.3
P38254	4631.2	5017.9		P38282	12291.8	12091.5
P38255	4362	4517.9		P38283	49669.4	48267.2
P38256	12388.6	11389.9		P38284	58840.1	50841.7
P38260	18357.5	18925.3		P38285	263396	280658
P38261	4165.8	4377.1		P38286	349.7	360.2
P38262	4401.1	4999.9		P38287	43910.9	43326.7
P38263	304	331.3		P38288	2895	2771.9
P38264	49219	43677.8		P38291	12625.2	11899
P38265	255.9	248.6		P38293	1454.4	1441.9
P38266	2034.4	1760.8		P38295	5365.8	5278.3
P38271	1236.7	1295		P38297	2912.2	2837.4
P38272	5868	5745.1		P38298	28630	29129.2
P38273	421.1	408.1		P38300	10945.1	11257
P38274	3814.1	3928.6		P38302	3771.5	3711.9
P38277	659.1	720.9		P38304	16354.9	15736
P38278	535.4	525.4		P38305	6618.9	6328
P38281	14266.9	17342.2		P38306	24575.8	23851.5
P38282	727.7	763.8		P38310	16348.9	16088.9
P38283	106.2	106.1		P38313	7852.7	7460.9
P38284	348.9	431.8		P38314	844.4	872.5
P38285	149.5	170.6		P38318	6946.9	9760.1
P38286	12851.7	12195.6		P38319	7446.2	7173.8
P38287	265.7	253.7		P38321	18592.6	22081.7
P38288	10992.8	12395		P38323	1295.6	1278.1
P38291	2178.8	2342.8		P38325	2794	2515.7
P38293	2868	3496.4		P38326	15294.9	15580.6
P38295	21345.3	20514		P38328	560.7	557
P38297	2632.4	2911.2		P38329	5479.9	5505.7
P38298	320.7	268.3		P38330	3545.5	3830.6
P38300	2269.4	2507.9		P38331	1468.9	1519.5
P38302	2810.1	2521.7		P38332	3642.8	3683.1
P38304	1414.1	1468.3		P38333	244.5	226.6
P38305	598.2	637.4		P38334	16256.4	16371.3
P38306	963.5	941.6		P38335	11815.5	10783.3
P38310	1747.9	1850.1		P38336	18737.5	18416.2
P38313	1292.2	1400.2		P38337	814.6	956.6
P38314	9285.9	9543.9		P38339	3451.8	3030.1
P38318	162.8	175.9		P38340	515	506.7
P38319	449.9	498.1		P38341	1631	1585.8
P38321	1444.3	1583.5		P38342	7552.2	8675.2
P38323	7586	7874.1		P38344	1240.1	1082
P38325	2621.3	3089.9		P38345	19266.8	17897.6
P38326	1071.5	1014		P38347	7907.3	7883.7
P38328	21226.5	21375.3		P38348	1679.6	1657.2
P38329	1462	1432.4		P38349	11885.3	11795.5
P38330	2020.6	2023.5		P38351	1721.1	1992.6
P38331	4001.3	3887		P38352	3801.2	4050.4
P38332	3077.7	3154.8		P38353	308.5	333.4
P38333	31155.8	30612.9		P38355	5982.2	5486.5
P38334	1067.8	975.6		P38356	76316.5	78046.4
P38335	882.4	996.6		P38374	3887.4	3793.7
P38336	600.3	618.7		P38426	1323.1	1373.6
P38337	1648.5	1795.9		P38427	504.7	488.4
P38339	7170.9	7688.5		P38428	2429.4	2239.9
P38340	7536.2	7342.3		P38429	4783.8	4611.3
P38341	5234.5	5637.7		P38430	13880.8	14381.7
P38342	5787.3	5669.2		P38431	1084.5	484
P38344	7236.8	7148.3		P38439	865.2	870.6
P38345	9949	11602.7		P38523	229.9	238.8
P38347	720.3	779.2		P38555	1324.1	1308.3
P38348	5207.5	5634.3		P38590	38915.7	37257.9
P38349	3080.9	3258		P38604	812.4	802.9
P38351	11160.5	11435.4		P38615	11673.5	10838.5
P38352	2855.4	3033.4		P38616	441.1	429.9
P38353	16420.3	15873.1		P38620	6736.8	7044.5
P38355	2745.1	2630.8		P38623	864.2	910.9
P38356	177.9	199.1		P38624	786.2	709.3
P38374	940.1	602		P38625	671.4	568.6
P38426	24072	25829.6		P38626	299	316.6
P38427	32526.4	34360.3		P38627	4196.6	4376.5
P38428	4053.5	4003		P38628	93.9	108.1
P38429	790.3	779.7		P38629	1269.8	1378
P38430	465.4	401.6		P38630	956.7	972.1
P38431	59211.4	56019		P38631	408.5	388
P38439	15450.5	17304.2		P38633	154982	159404
P38523	60239.9	61547.8		P38634	11394.7	10936.9
P38555	24336.9	25500.7		P38635	22288.3	19656.4
P38590	115.3	117.4		P38636	18513.8	16747
P38604	10952	9604.3		P38682	567.8	528.9
P38615	2115	2154.9		P38687	779.3	761.5
P38616	14176.2	15368.7		P38688	1049.2	1038
P38620	6090.7	6168.2		P38689	596.3	575.7
P38623	18073.3	18342		P38690	16444.4	16784
P38624	19666.3	20932.7		P38691	10915.4	10856.8
P38625	89971.8	86684.5		P38692	3086.5	2858.6
P38626	20074.1	19859.2		P38693	539.3	532.9
P38627	5589.2	6472.5		P38694	991.1	844.2
P38628	23753	25237.7		P38695	54396	56566.1
P38629	10983.9	11276.3		P38696	4800.2	4884.6
P38630	8751.8	9348.7		P38697	642.6	655.7
P38631	78518.7	77584.1		P38698	1264.5	1152.6
P38633	27.1	25.8		P38699	110642	109323
P38634	624.7	652.6		P38700	22939.6	23207.5
P38635	253.8	216.3		P38701	303.4	297.9
P38636	1323.5	1409.5		P38702	12967.8	12226.7
P38682	24874.9	25367		P38703	1828.2	1837.4
P38687	21111.6	21960.7		P38704	23196.8	22765.5
P38688	29371.4	28786.3		P38705	2437.6	2468.2
P38689	21776.6	21212.8		P38707	118.5	111.4
P38690	869.5	1174.1		P38708	428.8	371.5
P38691	1480.7	1607.9		P38710	2681.8	2601.1
P38692	1340.3	1425.7		P38711	433.6	401.3
P38693	16960.4	17578.7		P38712	701	551.7
P38694	20447.7	20483.6		P38713	1380	1381.6
P38695	294.9	319.2		P38714	14424.4	14282.5
P38696	1550.4	1688		P38715	61.3	64.7
P38697	11079.6	11869		P38716	7361.7	7117.4
P38698	8659.4	9020.3		P38717	24794.6	25156.3
P38699	172.4	223		P38719	1979.8	1725.7
P38700	241.9	280.1		P38720	23.3	21.3
P38701	155647	145055		P38723	20884	19507.6
P38702	460	525.6		P38731	65144.8	63292.3
P38703	4095.4	3479.8		P38732	1738.6	1712.3
P38704	764	756.1		P38736	1432.1	1471.9
P38705	2428.5	2712.4		P38737	1561.8	1600.7
P38707	106169	99875.8		P38738	5677	5712.2
P38708	87489.2	81764.6		P38741	11653.2	11230.3
P38710	7504.6	7617.9		P38742	23828	21967.2
P38711	77069.8	76172.6		P38744	7412.3	7344.9
P38712	29726.9	29633		P38746	10299.8	10005.9
P38713	5064.3	4997.5		P38747	1660.5	1596.2
P38714	641.4	743.1		P38748	17157.6	16634.2
P38715	48737	54759		P38749	130924	142736
P38716	3096.6	3243.7		P38750	7770.1	7850.7
P38717	811.9	808.8		P38753	2159.9	2062.2
P38719	9429.9	9569.8		P38754	55.7	57.7
P38720	195942	176357		P38755	1594.6	1531.3
P38723	1183.6	1107		P38756	3703.7	3346.9
P38731	63.2	69.9		P38757	175164	180639
P38732	8729.2	9200.6		P38758	387	360.6
P38736	10035	10062.3		P38759	1055	927.3
P38737	20829.4	22160.1		P38764	176.3	159.4
P38738	1010.4	1052.3		P38765	3957.9	4748.9
P38741	576.8	614.7		P38766	8234	8932.8
P38742	1388.1	1472.4		P38767	2106.4	2653.2
P38744	1227.9	1276.4		P38768	6763.7	6820.4
P38746	703.4	688.1		P38770	9243.3	8618.5
P38747	3483.1	3749.2		P38771	1425.3	1238.3
P38748	623.4	583.2		P38772	6356.7	6141
P38749	880.8	930.2		P38773	1100.7	1036.8
P38750	1621.3	1657.9		P38774	96917.9	94499.7
P38753	4666.7	4891.4		P38775	14635.1	14036.7
P38754	109734	101632		P38777	971.3	933.2
P38755	11017.3	11750.9		P38778	33137	33658.6
P38756	12509.5	12030.2		P38779	1492.8	1254.4
P38757	51.1	56.9		P38781	1660.1	1694.4
P38758	9733.3	10128.6		P38782	8636.9	8907.3
P38759	6051.5	6349.1		P38783	1311.5	1304.3
P38764	61075.4	63936.5		P38784	3359.5	3316.5
P38765	5433.8	5618.6		P38786	7290.6	6828.6
P38766	1117.8	1129.9		P38787	63.2	68
P38767	39.1	50.1		P38788	204	172.4
P38768	2673.5	2825.6		P38789	2564.1	2534.9
P38770	1136.5	1229.9		P38790	15565.6	16383.2
P38771	6349.9	7013.2		P38791	400.1	399.6
P38772	1840.4	1874.4		P38792	1248.4	1209.3
P38773	8826.7	9803.9		P38793	1002.6	966.8
P38774	45.1	47		P38795	525.7	581.5
P38775	2992	3045.6		P38796	31490	30827.5
P38777	29723.1	32027.3		P38797	817.4	531.3
P38778	187.3	200.7		P38798	919.2	827.9
P38779	27765	26477.2		P38799	7538.4	6886.3
P38781	3606.5	3540.4		P38800	23355	25882.6
P38782	926.5	1046.2		P38801	2459.3	2392.6
P38783	2704.5	3012.5		P38803	1146.2	1070.3
P38784	5667.8	5836.6		P38804	641.7	659.3
P38786	3719.1	3822.9		P38805	913.4	968.9
P38787	27145	27773.1		P38806	7209.1	6515.3
P38788	98029.3	92807.3		P38809	6389.4	6584.9
P38789	6560.6	6525.6		P38810	2728.8	2507.9
P38790	366.1	387.7		P38811	2301.4	2106.9
P38791	54971.7	55711.3		P38812	39491.4	37069.5
P38792	8348	8433.7		P38813	9530.6	10177.3
P38793	12625.7	12598		P38814	7882	7925.3
P38795	13735.4	14066.8		P38815	47378.5	46434.6
P38796	281.1	251		P38816	3665.9	3730.3
P38797	15171.4	15773.6		P38817	863.9	628
P38798	9080.3	9322.9		P38818	5420.6	5554.6
P38799	1325.2	1167.8		P38819	10354.1	10162.2
P38800	125.9	127.2		P38820	2860.4	2726.7
P38801	2147.3	2271.3		P38821	1338.5	1209
P38803	3327.1	3485.5		P38822	2259.1	2122.4
P38804	34509.3	43281.8		P38823	21563.3	20260
P38805	7432.2	7278.9		P38824	6763.1	6595.6
P38806	447	356.9		P38825	580.3	723.3
P38809	3761.5	4255.3		P38826	3427.2	3415.6
P38810	14374.5	15716.4		P38827	3446.1	2918.3
P38811	9409.3	9677.7		P38828	2508.9	2597.9
P38812	478.4	506.2		P38829	3155.6	3120.8
P38813	2744.7	2816.8		P38833	6764.8	6492.5
P38814	1791.3	1866.7		P38836	1268.7	1333.1
P38815	367.9	401.9		P38837	478.2	403
P38816	1502.2	1536.2		P38839	5842.2	5633.5
P38817	26893.7	26661.3		P38840	291.5	280.7
P38818	771	868.9		P38841	10505.2	10169.1
P38819	1990.5	1953.6		P38843	3223.3	3198.6
P38820	5584.7	5841		P38845	952.9	1128.9
P38821	8044.6	8223.4		P38848	28394	27800.6
P38822	11185.8	11391.5		P38849	18217.4	18090.5
P38823	1061.5	1089		P38850	1031.4	1003.9
P38824	1463.7	1904.2		P38851	4083.2	4165.5
P38825	15414	15717.5		P38852	7177.1	7205.4
P38826	1543.9	1527.3		P38853	3028.5	3125.3
P38827	3185.9	3074.3		P38854	929.3	954
P38828	9574.4	9808.8		P38856	11631.4	10929.1
P38829	2704.5	2840.7		P38857	50353.6	48375.2
P38833	4498.2	4371.7		P38858	987.5	973.3
P38836	7882.2	8451.7		P38859	25797.3	24171.7
P38837	5583.8	4934.1		P38860	25414.6	24370.7
P38839	899.5	972.4		P38861	1967.7	1978.5
P38840	83772.7	73499.7		P38862	5067.2	4821.1
P38841	2708	2671.8		P38863	19663	20236.9
P38843	2027.9	2038		P38866	74.3	83.8
P38845	39113.4	36893		P38869	21360.3	21309
P38848	52.4	58.1		P38870	7426.9	7749.2
P38849	135.8	120.3		P38871	38736.2	37836.6
P38850	7082.3	7276.3		P38873	3295.2	3431
P38851	715.1	702.5		P38874	5495.1	5140.3
P38852	763.6	939.7		P38875	2798.2	2564.7
P38853	14365	14770.4		P38876	92932	94352.2
P38854	331.3	362.7		P38877	7473.5	6637.5
P38856	891.5	1079.5		P38878	9801.2	10176.9
P38857	152.9	158.6		P38879	229.8	236.2
P38858	16915.9	17310.8		P38880	178185	181011
P38859	838	907.4		P38881	20732.8	21219
P38860	268.1	294.2		P38882	1905.5	1793.5
P38861	16260.3	16872.6		P38883	2705.7	2639.1
P38862	1105.4	1201.3		P38884	8009.8	7908.9
P38863	2369.2	2481.1		P38885	9289.1	7900.6
P38866	96.9	120.3		P38886	1173.8	1105.9
P38869	2376.2	2208.9		P38887	12734.4	12274.7
P38870	1076.3	1185.6		P38888	95759	92095.7
P38871	125.7	136.2		P38889	6836.5	6741.5
P38873	3307.5	3467.7		P38890	3544.8	4021.9
P38874	1515.3	1497		P38891	166.1	155.3
P38875	2989.7	2994.4		P38892	1395.6	1437.8
P38876	81.3	93.9		P38902	2251.5	2210.7
P38877	1580	1663.4		P38903	2657.4	2787.9
P38878	3491.2	3648.4		P38904	6481.1	6264.6
P38879	57610.3	61494.6		P38909	10188.6	10193.4
P38880	41	41.8		P38910	122.5	94.2
P38881	950.9	991.8		P38911	62.5	57.2
P38882	16537.3	17196.4		P38912	2511.1	2437.6
P38883	9151	9471.3		P38913	19163.3	19679.2
P38884	2499.4	2797.4		P38915	4848.1	4975.4
P38885	2509.4	2392.1		P38920	4521.1	4490.5
P38886	12310.8	13752		P38921	22889	24961.6
P38887	1257.5	1389.1		P38922	8004.6	7495
P38888	287.1	294.4		P38925	304205	270942
P38889	2861.5	3027.2		P38928	11605	11238.9
P38890	4445.6	4492.7		P38929	2831.3	2692.6
P38891	114830	107417		P38930	2824.6	2695.6
P38892	6503.2	8179.6		P38931	50689.4	52147.9
P38902	17499.7	19755.8		P38932	1141.4	997
P38903	9012.3	9044.2		P38934	66.3	59.4
P38904	676.8	768.6		P38954	4142.2	3945.9
P38909	905.8	930.5		P38958	2141.6	2097.2
P38910	102092	108473		P38959	12834	12861.5
P38911	30944.1	30332.4		P38961	1586.3	1503.1
P38912	56586	56617.4		P38962	3541	3611.3
P38913	890.7	1011.9		P38966	7976.4	7418.5
P38915	4195.4	4288.2		P38967	32347.1	30992.9
P38920	2119.5	2098.9		P38968	433.9	397.6
P38921	864	1055.1		P38969	11391.8	11385.4
P38922	12772.8	12915.5		P38970	8979.5	8187.4
P38925	280.3	260.3		P38972	742.9	718.7
P38928	2252.1	2307.6		P38985	3263.9	3405.2
P38929	4515.8	4708.4		P38986	2259.5	2169.6
P38930	5613.6	5777.5		P38987	27629.6	28248.6
P38931	287	310.9		P38988	214.1	246.4
P38932	5176.4	5408.3		P38989	201.9	205.9
P38934	110646	111807		P38990	56489.9	55820
P38954	535.9	519.7		P38992	863.3	832.4
P38958	2732.1	2972.7		P38993	9672.2	8549.4
P38959	1637.1	1794.3		P38994	4993.1	4948.1
P38961	14949.2	14853.6		P38995	32815.5	32193.2
P38962	1491.7	1436		P38996	3544.1	3324.2
P38966	4733.8	4897		P38998	447.7	395
P38967	257.9	276.8		P38999	146.8	152.7
P38968	46074.6	46989.2		P39001	56057	51999.7
P38969	1362.6	1581.8		P39002	1043	948.1
P38970	4520.5	4769		P39003	19137.1	18627.7
P38972	76377.6	74407.9		P39004	961.5	1151.2
P38985	7422.8	7436.9		P39005	18056.3	16458.3
P38986	19697.6	19405.4		P39006	2961.3	3057
P38987	781.8	797.4		P39007	955.5	862.4
P38988	34807.6	34837.6		P39008	3231.3	3378.8
P38989	5129.2	5629.4		P39009	445.4	437.9
P38990	316.2	338.3		P39010	1753.3	1898.5
P38992	6554.3	6106.7		P39011	87362.5	87139.4
P38993	2104.9	1906.4		P39012	323.3	328.4
P38994	3787.6	3772		P39013	871.1	961.3
P38995	370.5	358.6		P39014	40888.2	40204.3
P38996	9385.6	9503.5		P39015	72.7	56.7
P38998	29749.8	28433.6		P39016	2413.2	2525.7
P38999	70315.3	69635.6		P39073	24553.7	24226.6
P39001	670.9	687.4		P39076	34.8	46.6
P39002	8360.9	8205.5		P39077	61.8	69.2
P39003	147.9	144.6		P39078	3767.9	3503.9
P39004	46746.5	45535.9		P39079	552.7	500
P39005	715.5	730.5		P39081	2550.4	2589.4
P39006	4403	4875.4		P39083	13307.9	12334.6
P39007	17929.9	17650.6		P39101	354.5	292.2
P39008	2195.2	2258.6		P39102	4103.7	4018.4
P39009	5696.9	5649.6		P39103	5908.2	6209.6
P39010	9525.5	9262.8		P39104	1281.6	1276.3
P39011	3203.8	3311.2		P39105	2305.8	2265.1
P39012	20731.6	19339.7		P39106	1326.8	1111.4
P39013	13835.1	14311.1		P39107	1791	1663
P39014	181	189.9		P39108	11203.4	10756.5
P39015	152694	145310		P39109	1091.6	991
P39016	3817.9	4053.7		P39110	17582.3	18572.4
P39073	769	841.1		P39111	5850.8	6266.4
[truncated: 2,624 more rows]

## Sheet: Sheet2
Protein FDR Confidence: Combined	Master	Accession	Description	Abundance Ratio: (dcp2) / (WT)	Abundance Ratio (log2): (dcp2) / (WT)	Abundance Ratio P-Value: (dcp2) / (WT)	Abundances (Grouped): dcp2	Abundances (Grouped): WT	Abundances (Normalized): F1: 127N, Sample, dcp2	Abundances (Normalized): F1: 128C, Sample, dcp2	Abundances (Normalized): F1: 131C, Sample, dcp2	Abundances (Normalized): F1: 127C, Sample, WT	Abundances (Normalized): F1: 129C, Sample, WT	Abundances (Normalized): F1: 131N, Sample, WT	Abundance: F1: 127N, Sample, dcp2	Abundance: F1: 128C, Sample, dcp2	Abundance: F1: 131C, Sample, dcp2	Abundance: F1: 127C, Sample, WT	Abundance: F1: 129C, Sample, WT	Abundance: F1: 131N, Sample, WT
High	Master Protein	P19097	Fatty acid synthase subunit alpha OS=Saccharomyces cerevisiae (strain ATCC 204508 / S288c) OX=559292 GN=FAS2 PE=1 SV=2	1.095	0.13	0.178428	108.3	99	408203	440599	492394	407909	402541	397680	370295	383186	4537.5	314183	385433	383453
High	Master Protein	Q00955	Acetyl-CoA carboxylase OS=Saccharomyces cerevisiae (strain ATCC 204508 / S288c) OX=559292 GN=ACC1 PE=1 SV=2	0.728	-0.46	0.415134	84	115.5	221142	251354	382935	352004	345439	329537	200605	218601	3528.8	271123	330759	317747
High	Master Protein	P07149	Fatty acid synthase subunit beta OS=Saccharomyces cerevisiae (strain ATCC 204508 / S288c) OX=559292 GN=FAS1 PE=1 SV=2	0.972	-0.04	0.920905	99.9	102.8	338085	365614	325256	359876	347674	342450	306688	317973	2997.3	277186	332898	330199
High	Master Protein	P07259	Protein URA2 OS=Saccharomyces cerevisiae (strain ATCC 204508 / S288c) OX=559292 GN=URA2 PE=1 SV=5	0.594	-0.75	0.0799225	76.9	129.4	148530	152515	244128	256595	258450	248400	134736	132642	2249.7	197637	247466	239514
High	Master Protein	P33892	eIF-2-alpha kinase activator GCN1 OS=Saccharomyces cerevisiae (strain ATCC 204508 / S288c) OX=559292 GN=GCN1 PE=1 SV=1	1.105	0.14	0.3108	107.8	97.5	132277	130971	116188	120913	118491	111461	119993	113904	1070.7	93130.2	113455	107474
High	Master Protein	Q12019	Midasin OS=Saccharomyces cerevisiae (strain ATCC 204508 / S288c) OX=559292 GN=MDN1 PE=1 SV=1	1.166	0.22	0.460036	119	102.1	60676.5	60013.5	48975.3	51860.1	51333.4	51472.8	55041.6	52193.4	451.3	39944.1	49151.8	49631.3
High	Master Protein	P32324	Elongation factor 2 OS=Saccharomyces cerevisiae (strain ATCC 204508 / S288c) OX=559292 GN=EFT1 PE=1 SV=1	0.681	-0.55	8.71837e-05	87.2	128.1	527948	518788	587726	801630	774960	747650	478920	451186	5416	617437	742025	720903
High	Master Protein	P06105	Protein SCP160 OS=Saccharomyces cerevisiae (strain ATCC 204508 / S288c) OX=559292 GN=SCP160 PE=1 SV=3	0.673	-0.57	0.0254049	81.6	121.4	141897	137776	190870	217711	210980	205055	128720	119823	1758.9	167687	202014	197719
High	Master Protein	P16521	Elongation factor 3A OS=Saccharomyces cerevisiae (strain ATCC 204508 / S288c) OX=559292 GN=YEF3 PE=1 SV=4	0.82	-0.29	0.0124909	93.7	114.2	507870	459866	564836	637730	618977	616557	460706	399942	5205.1	491197	592672	594499
High	Master Protein	P10964	DNA-directed RNA polymerase I subunit RPA190 OS=Saccharomyces cerevisiae (strain ATCC 204508 / S288c) OX=559292 GN=RPA190 PE=1 SV=2	0.988	-0.02	0.963608	104.4	105.6	102199	99249.3	111708	104376	103410	100168	92708.5	86316.5	1029.4	80393.5	99015.3	96584.8
High	Master Protein	P16861	ATP-dependent 6-phosphofructokinase subunit alpha OS=Saccharomyces cerevisiae (strain ATCC 204508 / S288c) OX=559292 GN=PFK1 PE=1 SV=1	0.847	-0.24	0.1436	90.4	106.8	212778	198473	244892	260897	251319	237378	193018	172610	2256.7	200950	240638	228886
High	Master Protein	P00549	Pyruvate kinase 1 OS=Saccharomyces cerevisiae (strain ATCC 204508 / S288c) OX=559292 GN=CDC19 PE=1 SV=2	0.649	-0.62	0.0230725	73.1	112.6	520829	461225	697814	802155	833447	777980	472461	401124	6430.5	617842	798027	750148
High	Master Protein	P10591	Heat shock protein SSA1 OS=Saccharomyces cerevisiae (strain ATCC 204508 / S288c) OX=559292 GN=SSA1 PE=1 SV=4	1.025	0.04	0.258288	94.6	92.3	635208	641945	708165	592702	635258	626531	576219	558296	6525.9	456516	608260	604117
High	Master Protein	Q05022	rRNA biogenesis protein RRP5 OS=Saccharomyces cerevisiae (strain ATCC 204508 / S288c) OX=559292 GN=RRP5 PE=1 SV=1	0.91	-0.14	0.000986157	98.6	108.3	125588	122751	127327	141619	138009	135531	113925	106756	1173.3	109079	132144	130683
High	Master Protein	P10592	Heat shock protein SSA2 OS=Saccharomyces cerevisiae (strain ATCC 204508 / S288c) OX=559292 GN=SSA2 PE=1 SV=3	0.786	-0.35	0.180728	92.6	117.8	85083.2	93787	107717	103963	134709	119377	77181.8	81566	992.6	80075.4	128984	115106
High	Master Protein	P38249	Eukaryotic translation initiation factor 3 subunit A OS=Saccharomyces cerevisiae (strain ATCC 204508 / S288c) OX=559292 GN=RPG1 PE=1 SV=1	1.023	0.03	0.17472	98.2	96	184414	178095	179712	178854	174858	175586	167288	154888	1656.1	137758	167427	169304
High	Master Protein	Q12680	Glutamate synthase [NADH] OS=Saccharomyces cerevisiae (strain ATCC 204508 / S288c) OX=559292 GN=GLT1 PE=1 SV=2	0.592	-0.76	0.00060919	87.6	148	57118.5	56792.2	71143.1	96993.1	96456.1	93722.5	51814.1	49391.8	655.6	74706.7	92356.8	90369.6
High	Master Protein	P15108	ATP-dependent molecular chaperone HSC82 OS=Saccharomyces cerevisiae (strain ATCC 204508 / S288c) OX=559292 GN=HSC82 PE=1 SV=4	0.806	-0.31	5.28237e-06	97.5	121.1	518206	513741	525345	621665	646115	643267	470082	446798	4841.2	478823	618656	620254
High	Master Protein	P17255	V-type proton ATPase catalytic subunit A OS=Saccharomyces cerevisiae (strain ATCC 204508 / S288c) OX=559292 GN=VMA1 PE=1 SV=3	1.14	0.19	0.860928	113.2	99.3	280150	263866	203192	230674	236061	231466	254133	229483	1872.5	177672	226029	223185
High	Master Protein	P22137	Clathrin heavy chain OS=Saccharomyces cerevisiae (strain ATCC 204508 / S288c) OX=559292 GN=CHC1 PE=1 SV=1	0.77	-0.38	0.290573	81.6	105.9	81787.8	81554.5	110031	107490	106221	101126	74192.5	70927.4	1014	82791.4	101706	97508.7
High	Master Protein	P00359	Glyceraldehyde-3-phosphate dehydrogenase 3 OS=Saccharomyces cerevisiae (strain ATCC 204508 / S288c) OX=559292 GN=TDH3 PE=1 SV=3	1.031	0.04	0.992254	105.3	102.1	918002	956522	746163	903094	856900	890146	832750	831881	6876	695588	820484	858301
High	Master Protein	P08566	Pentafunctional AROM polypeptide OS=Saccharomyces cerevisiae (strain ATCC 204508 / S288c) OX=559292 GN=ARO1 PE=1 SV=1	1.322	0.4	0.033227	126.8	95.9	134944	129285	106645	97822.9	102162	97308.5	122413	112438	982.8	75345.8	97820.8	93827.3
High	Master Protein	P31539	Heat shock protein 104 OS=Saccharomyces cerevisiae (strain ATCC 204508 / S288c) OX=559292 GN=HSP104 PE=1 SV=2	1.667	0.74	0.000345105	99.6	59.8	192813	204031	159571	116456	112651	115664	174907	177444	1470.5	89697.3	107863	111526
High	Master Protein	P07806	Valine--tRNA ligase, mitochondrial OS=Saccharomyces cerevisiae (strain ATCC 204508 / S288c) OX=559292 GN=VAS1 PE=1 SV=2	0.883	-0.18	0.000404674	98	111	139724	134671	136913	154982	159404	153831	126749	117122	1261.7	119371	152630	148328
High	Master Protein	P02829	ATP-dependent molecular chaperone HSP82 OS=Saccharomyces cerevisiae (strain ATCC 204508 / S288c) OX=559292 GN=HSP82 PE=1 SV=1	1.563	0.64	0.00764612	119.9	76.7	38034	38684.8	29180.6	24034.3	24335.9	24879.5	34501.9	33643.9	268.9	18511.9	23301.7	23989.4
High	Master Protein	Q12273	Transposon Ty1-OL Gag-Pol polyprotein OS=Saccharomyces cerevisiae (strain ATCC 204508 / S288c) OX=559292 GN=TY1B-OL PE=3 SV=1	0.829	-0.27	0.250743	119.5	144.2	260687	272673	127072	292046	314541	316740	236478	237142	1171	224942	301173	305409
High	Master Protein	P11484	Ribosome-associated molecular chaperone SSB1 OS=Saccharomyces cerevisiae (strain ATCC 204508 / S288c) OX=559292 GN=SSB1 PE=1 SV=3	0.724	-0.47	0.000310499	93	128.4	456351	447292	414516	566848	617688	620297	413971	389007	3819.8	436602	591437	598106
High	Master Protein	P00358	Glyceraldehyde-3-phosphate dehydrogenase 2 OS=Saccharomyces cerevisiae (strain ATCC 204508 / S288c) OX=559292 GN=TDH2 PE=1 SV=3	1.016	0.02	0.948031	90.7	89.3	24534.5	25396.9	26640.5	25947.3	25003.8	23547.4	22256.1	22087.6	245.5	19985.3	23941.2	22705
High	Master Protein	P03965	Carbamoyl-phosphate synthase arginine-specific large chain OS=Saccharomyces cerevisiae (strain ATCC 204508 / S288c) OX=559292 GN=CPA2 PE=1 SV=1	2.346	1.23	0.013506	147.3	62.8	190334	202178	106375	76624.9	83937	81121.3	172658	175833	980.3	59018.6	80369.8	78219.2
High	Master Protein	P05030	Plasma membrane ATPase 1 OS=Saccharomyces cerevisiae (strain ATCC 204508 / S288c) OX=559292 GN=PMA1 PE=1 SV=2	0.814	-0.3	0.122797	94.5	116	259150	252666	310390	321825	318238	301937	235083	219742	2860.3	247878	304713	291135
High	Master Protein	P32589	Heat shock protein homolog SSE1 OS=Saccharomyces cerevisiae (strain ATCC 204508 / S288c) OX=559292 GN=SSE1 PE=1 SV=4	0.802	-0.32	0.000482633	92.8	115.7	218230	220501	241373	273253	283106	274868	197964	191769	2224.3	210467	271075	265034
High	Master Protein	P0CS90	Heat shock protein SSC1, mitochondrial OS=Saccharomyces cerevisiae (strain ATCC 204508 / S288c) OX=559292 GN=SSC1 PE=1 SV=1	1.024	0.03	0.767374	104.3	101.8	233661	244834	221880	219512	232628	228091	211961	212931	2044.7	169074	222742	219931
High	Master Protein	P06169	Pyruvate decarboxylase isozyme 1 OS=Saccharomyces cerevisiae (strain ATCC 204508 / S288c) OX=559292 GN=PDC1 PE=1 SV=7	0.816	-0.29	0.0189507	87.1	106.7	544979	545896	628999	668678	725328	658984	494368	474762	5796.3	515034	694502	635409
High	Master Protein	P40150	Ribosome-associated molecular chaperone SSB2 OS=Saccharomyces cerevisiae (strain ATCC 204508 / S288c) OX=559292 GN=SSB2 PE=1 SV=2	0.765	-0.39	0.94136	90.6	118.5	1637.3	1852.6	3313.5	2106.4	2653.2	2421.5	1485.3	1611.2	30.5	1622.4	2540.4	2334.8
High	Master Protein	P26637	Leucine--tRNA ligase, cytoplasmic OS=Saccharomyces cerevisiae (strain ATCC 204508 / S288c) OX=559292 GN=CDC60 PE=1 SV=1	0.927	-0.11	0.121639	102.7	110.8	186419	175251	159783	187584	194711	189076	169107	152415	1472.4	144483	186436	182312
High	Master Protein	Q04711	Transposon Ty1-ML1 Gag-Pol polyprotein OS=Saccharomyces cerevisiae (strain ATCC 204508 / S288c) OX=559292 GN=TY1B-ML1 PE=3 SV=2	0.979	-0.03	0.613744	136.8	139.7	32579.1	29118.4	3738.6	27206.3	29737	33044.1	29553.6	25324.1	34.5	20955	28473.2	31861.9
High	Master Protein	P09436	Isoleucine--tRNA ligase, cytoplasmic OS=Saccharomyces cerevisiae (strain ATCC 204508 / S288c) OX=559292 GN=ILS1 PE=1 SV=1	0.961	-0.06	0.547549	98.5	102.6	171148	160723	179602	178185	181011	173028	155254	139780	1655.1	137243	173318	166838
High	Master Protein	P00925	Enolase 2 OS=Saccharomyces cerevisiae (strain ATCC 204508 / S288c) OX=559292 GN=ENO2 PE=1 SV=2	0.727	-0.46	0.000353635	88	121	644971	631294	720923	886880	908790	862075	585074	549033	6643.4	683099	870168	831234
High	Master Protein	P00560	Phosphoglycerate kinase OS=Saccharomyces cerevisiae (strain ATCC 204508 / S288c) OX=559292 GN=PGK1 PE=1 SV=2	1.777	0.83	0.0672233	151.6	85.3	971242	918577	539884	456344	516923	524326	881046	798881	4975.1	351489	494954	505568
High	Master Protein	O13535	Transposon Ty1-H Gag-Pol polyprotein OS=Saccharomyces cerevisiae (strain ATCC 204508 / S288c) OX=559292 GN=TY1B-H PE=3 SV=1	0.418	-1.26	0.000539497	83	198.6	630	663.1		1194.9	1546.1	1606.4	571.5	576.7		920.4	1480.4	1549
High	Master Protein	Q12316	Transposon Ty1-GR3 Gag-Pol polyprotein OS=Saccharomyces cerevisiae (strain ATCC 204508 / S288c) OX=559292 GN=TY1B-GR3 PE=3 SV=3	0.937	-0.09	0.966096	108.6	115.9	1583.7	1450	1980.8	1794.3	1686.2	1690	1436.6	1261	18.3	1382	1614.6	1629.5
High	Master Protein	P40825	Alanine--tRNA ligase, mitochondrial OS=Saccharomyces cerevisiae (strain ATCC 204508 / S288c) OX=559292 GN=ALA1 PE=1 SV=3	0.96	-0.06	0.997265	103	107.3	174110	167128	210782	180094	181350	182037	157941	145350	1942.4	138713	173643	175525
High	Master Protein	Q08972	[NU+] prion formation protein 1 OS=Saccharomyces cerevisiae (strain ATCC 204508 / S288c) OX=559292 GN=NEW1 PE=1 SV=1	0.911	-0.13	0.646388	96.8	106.2	86115.7	83133.2	97856.5	96917.9	94499.7	89742.3	78118.4	72300.4	901.8	74648.8	90483.6	86531.8
High	Master Protein	P25694	Cell division control protein 48 OS=Saccharomyces cerevisiae (strain ATCC 204508 / S288c) OX=559292 GN=CDC48 PE=1 SV=3	1.089	0.12	0.036637	99.3	91.2	126083	124148	134842	121634	115216	115779	114374	107971	1242.6	93686.1	110319	111637
High	Master Protein	P05694	5-methyltetrahydropteroyltriglutamate--homocysteine methyltransferase OS=Saccharomyces cerevisiae (strain ATCC 204508 / S288c) OX=559292 GN=MET6 PE=1 SV=4	0.818	-0.29	0.000602151	100.6	122.9	271617	275106	292519	336249	331832	337457	246393	239258	2695.6	258988	317730	325385
High	Master Protein	P38088	Glycine--tRNA ligase 1, mitochondrial OS=Saccharomyces cerevisiae (strain ATCC 204508 / S288c) OX=559292 GN=GRS1 PE=1 SV=3	0.988	-0.02	0.920497	100.9	102	184216	175964	184951	186392	186576	179293	167109	153034	1704.4	143564	178647	172879
High	Master Protein	P15705	Heat shock protein STI1 OS=Saccharomyces cerevisiae (strain ATCC 204508 / S288c) OX=559292 GN=STI1 PE=1 SV=1	1.051	0.07	0.105387	106.2	101	176232	174018	178291	166004	173094	167637	159865	151343	1643	127860	165738	161640
High	Master Protein	P38631	1,3-beta-glucan synthase component FKS1 OS=Saccharomyces cerevisiae (strain ATCC 204508 / S288c) OX=559292 GN=FKS1 PE=1 SV=2	0.879	-0.19	0.630126	85.7	97.5	78518.7	77584.1	93696.7	89531.6	89303.3	86449.2	71226.9	67474.4	863.4	68959.7	85508	83356.5
High	Master Protein	Q03690	Clustered mitochondria protein 1 OS=Saccharomyces cerevisiae (strain ATCC 204508 / S288c) OX=559292 GN=CLU1 PE=1 SV=1	0.778	-0.36	0.264199	88.2	113.4	82189.1	85276.7	113806	111613	109624	105745	74556.5	74164.5	1048.7	85967.3	104965	101962
High	Master Protein	Q99337	Transposon Ty1-NL2 Gag-Pol polyprotein OS=Saccharomyces cerevisiae (strain ATCC 204508 / S288c) OX=559292 GN=TY1B-NL2 PE=3 SV=1	0.55	-0.86	0.000926394	91.3	165.9	2961.3	3213.4	3990.5	5790.6	6174.4	5841.2	2686.3	2794.7	36.8	4460.1	5912	5632.2
High	Master Protein	P16474	Endoplasmic reticulum chaperone BiP OS=Saccharomyces cerevisiae (strain ATCC 204508 / S288c) OX=559292 GN=KAR2 PE=1 SV=1	0.964	-0.05	0.764844	95.6	99.1	151396	155864	169227	161485	166098	161610	137336	135554	1559.5	124380	159039	155828
High	Master Protein	P19414	Aconitate hydratase, mitochondrial OS=Saccharomyces cerevisiae (strain ATCC 204508 / S288c) OX=559292 GN=ACO1 PE=1 SV=2	1.605	0.68	0.0159498	109.5	68.3	226464	225976	161864	140826	138950	142536	205433	196530	1491.6	108468	133044	137436
High	Master Protein	Q02455	Protein MLP1 OS=Saccharomyces cerevisiae (strain ATCC 204508 / S288c) OX=559292 GN=MLP1 PE=1 SV=2	1.111	0.15	0.0662105	111.1	100	26796.6	27224.2	29085.4	25873.6	24509.1	24445.8	24308.1	23676.7	268	19928.5	23467.5	23571.3
High	Master Protein	P32582	Cystathionine beta-synthase OS=Saccharomyces cerevisiae (strain ATCC 204508 / S288c) OX=559292 GN=CYS4 PE=1 SV=1	1.111	0.15	0.219976	106.7	96.1	195656	183022	251170	175164	180639	176161	177486	159173	2314.6	134916	172962	169859
High	Master Protein	P54115	Magnesium-activated aldehyde dehydrogenase, cytosolic OS=Saccharomyces cerevisiae (strain ATCC 204508 / S288c) OX=559292 GN=ALD6 PE=1 SV=4	0.654	-0.61	0.0303431	82.8	126.5	165714	164491	228874	253388	256860	244082	150325	143057	2109.1	195166	245944	235350
High	Master Protein	P19524	Myosin-2 OS=Saccharomyces cerevisiae (strain ATCC 204508 / S288c) OX=559292 GN=MYO2 PE=1 SV=1	0.926	-0.11	0.590482	97.3	105.1	31294.4	32887	36581.3	35524.4	36188.9	34444	28388.2	28601.6	337.1	27361.9	34650.9	33211.8
High	Master Protein	P25655	General negative regulator of transcription subunit 1 OS=Saccharomyces cerevisiae (strain ATCC 204508 / S288c) OX=559292 GN=CDC39 PE=1 SV=3	0.953	-0.07	0.933557	100.6	105.6	26385.6	26483.7	27667.7	28394	27800.6	26150.1	23935.2	23032.7	255	21869.8	26619.1	25214.6
High	Master Protein	P38972	Phosphoribosylformylglycinamidine synthase OS=Saccharomyces cerevisiae (strain ATCC 204508 / S288c) OX=559292 GN=ADE6 PE=1 SV=2	0.866	-0.21	0.446533	96.6	111.5	76377.6	74407.9	91934.3	88199	88201.2	86319.5	69284.6	64712	847.2	67933.3	84452.8	83231.4
High	Master Protein	P19882	Heat shock protein 60, mitochondrial OS=Saccharomyces cerevisiae (strain ATCC 204508 / S288c) OX=559292 GN=HSP60 PE=1 SV=1	1.092	0.13	0.00787796	102.7	94	276858	274252	262472	251344	251053	241857	251147	238515	2418.7	193592	240384	233205
High	Master Protein	P40069	Importin subunit beta-4 OS=Saccharomyces cerevisiae (strain ATCC 204508 / S288c) OX=559292 GN=KAP123 PE=1 SV=1	0.311	-1.68	0.0370707	46.3	148.9	35707.3	37100.7	94155.7	119197	119655	113078	32391.3	32266.2	867.7	91808.8	114570	109032
High	Master Protein	P32565	26S proteasome regulatory subunit RPN2 OS=Saccharomyces cerevisiae (strain ATCC 204508 / S288c) OX=559292 GN=RPN2 PE=1 SV=4	1.221	0.29	0.156639	105	86	106866	108217	85850.7	87527.2	87573.1	84994.6	96942.1	94115.6	791.1	67415.8	83851.4	81953.9
High	Master Protein	P46655	Glutamate--tRNA ligase, cytoplasmic OS=Saccharomyces cerevisiae (strain ATCC 204508 / S288c) OX=559292 GN=GUS1 PE=1 SV=3	0.932	-0.1	0.0935936	104.7	112.4	180726	174588	157363	185028	193134	187358	163942	151838	1450.1	142513	184926	180655
High	Master Protein	P04807	Hexokinase-2 OS=Saccharomyces cerevisiae (strain ATCC 204508 / S288c) OX=559292 GN=HXK2 PE=1 SV=4	0.683	-0.55	0.316848	74.2	108.7	114013	112145	179154	166938	168608	157949	103425	97531.5	1650.9	128580	161442	152298
High	Master Protein	Q07878	Vacuolar protein sorting-associated protein 13 OS=Saccharomyces cerevisiae (strain ATCC 204508 / S288c) OX=559292 GN=VPS13 PE=1 SV=1	1.217	0.28	0.0150999	117.9	96.9	27395.4	28323.8	33114.9	24229.4	23273	22284	24851.2	24633	305.2	18662.1	22283.9	21486.8
High	Master Protein	Q12490	Transposon Ty1-BL Gag-Pol polyprotein OS=Saccharomyces cerevisiae (strain ATCC 204508 / S288c) OX=559292 GN=TY1B-BL PE=1 SV=1	0.864	-0.21	0.0593856	109.7	127	9328	9596.7	7295.8	10500	11017.1	10797	8461.7	8346.2	67.2	8087.4	10548.9	10410.7
High	Master Protein	P04801	Threonine--tRNA ligase, cytoplasmic OS=Saccharomyces cerevisiae (strain ATCC 204508 / S288c) OX=559292 GN=THS1 PE=1 SV=2	1.157	0.21	0.0652745	105.3	91	154111	152193	134733	131545	134528	130356	139800	132362	1241.6	101320	128810	125693
High	Master Protein	P07264	3-isopropylmalate dehydratase OS=Saccharomyces cerevisiae (strain ATCC 204508 / S288c) OX=559292 GN=LEU1 PE=1 SV=3	1.429	0.52	0.100334	137.1	95.9	278649	256761	179826	167855	180350	179649	252772	223303	1657.1	129286	172685	173222
High	Master Protein	P07702	L-2-aminoadipate reductase OS=Saccharomyces cerevisiae (strain ATCC 204508 / S288c) OX=559292 GN=LYS2 PE=1 SV=2	1.454	0.54	0.131661	129.2	88.8	74353.7	71254.7	49197.7	48997.5	50293.8	48765.6	67448.7	61969.7	453.4	37739.2	48156.3	47021
High	Master Protein	P13188	Glutamine--tRNA ligase OS=Saccharomyces cerevisiae (strain ATCC 204508 / S288c) OX=559292 GN=GLN4 PE=1 SV=2	1.067	0.09	0.219905	101.5	95.2	114513	110579	103023	103665	104087	102649	103878	96170.1	949.4	79845.5	99663.3	98977
High	Master Protein	P06634	ATP-dependent RNA helicase DED1 OS=Saccharomyces cerevisiae (strain ATCC 204508 / S288c) OX=559292 GN=DED1 PE=1 SV=2	1.084	0.12	0.164491	106.4	98.1	146535	141761	148099	143937	133361	135191	132926	123289	1364.8	110864	127693	130354
High	Master Protein	P04147	Polyadenylate-binding protein, cytoplasmic and nuclear OS=Saccharomyces cerevisiae (strain ATCC 204508 / S288c) OX=559292 GN=PAB1 PE=1 SV=4	0.575	-0.8	0.00189539	76.3	132.7	119828	120859	161413	210109	223670	209045	108700	105110	1487.5	161832	214165	201566
High	Master Protein	P34216	EH domain-containing and endocytosis protein 1 OS=Saccharomyces cerevisiae (strain ATCC 204508 / S288c) OX=559292 GN=EDE1 PE=1 SV=2	1.313	0.39	0.0460421	115.5	88	40173.7	41571.7	32206.3	30813.2	30017.4	30596	36442.9	36154.7	296.8	23733.1	28741.7	29501.4
High	Master Protein	P38720	6-phosphogluconate dehydrogenase, decarboxylating 1 OS=Saccharomyces cerevisiae (strain ATCC 204508 / S288c) OX=559292 GN=GND1 PE=1 SV=1	0.98	-0.03	0.996145	98.6	100.6	195942	176357	217437	199969	201102	192669	177746	153376	2003.7	154022	192555	185776
High	Master Protein	P04050	DNA-directed RNA polymerase II subunit RPB1 OS=Saccharomyces cerevisiae (strain ATCC 204508 / S288c) OX=559292 GN=RPO21 PE=1 SV=2	0.798	-0.32	0.00336819	87.2	109.2	46486.4	45634.6	52306.9	59978.1	58225.6	57653.8	42169.4	39688.1	482	46196.7	55751.1	55591.2
High	Master Protein	P02994	Elongation factor 1-alpha OS=Saccharomyces cerevisiae (strain ATCC 204508 / S288c) OX=559292 GN=TEF1 PE=1 SV=1	1.058	0.08	0.972667	104	98.3	817477	815182	635880	753640	770276	800655	741561	708958	5859.8	580474	737541	772012
High	Master Protein	P32558	FACT complex subunit SPT16 OS=Saccharomyces cerevisiae (strain ATCC 204508 / S288c) OX=559292 GN=SPT16 PE=1 SV=1	0.937	-0.09	0.998851	92.8	99	59331.7	59195.5	72149.7	65144.8	63292.3	62848.2	53821.7	51482	664.9	50176.3	60602.5	60599.8
High	Master Protein	Q05506	Arginine--tRNA ligase, cytoplasmic OS=Saccharomyces cerevisiae (strain ATCC 204508 / S288c) OX=559292 GN=YDR341C PE=1 SV=1	0.962	-0.06	0.451866	99.2	103.1	121292	118667	109232	124291	123308	118613	110028	103204	1006.6	95732	118068	114369
High	Master Protein	P22147	5'-3' exoribonuclease 1 OS=Saccharomyces cerevisiae (strain ATCC 204508 / S288c) OX=559292 GN=XRN1 PE=1 SV=1	1.197	0.26	0.212562	118	98.6	81840	77475.4	63855.5	64737.6	66445.2	63585.7	74239.8	67379.9	588.4	49862.7	63621.4	61311
High	Master Protein	P15180	Lysine--tRNA ligase, cytoplasmic OS=Saccharomyces cerevisiae (strain ATCC 204508 / S288c) OX=559292 GN=KRS1 PE=1 SV=2	1.092	0.13	0.424319	113.4	103.9	157042	145808	127878	133754	130617	133538	142458	126808	1178.4	103021	125066	128761
High	Master Protein	P32327	Pyruvate carboxylase 2 OS=Saccharomyces cerevisiae (strain ATCC 204508 / S288c) OX=559292 GN=PYC2 PE=1 SV=2	1.059	0.08	0.17432	96.5	91.2	122357	115840	110430	111177	108560	109400	110994	100745	1017.6	85631.3	103946	105486
High	Master Protein	P07245	C-1-tetrahydrofolate synthase, cytoplasmic OS=Saccharomyces cerevisiae (strain ATCC 204508 / S288c) OX=559292 GN=ADE3 PE=1 SV=1	0.961	-0.06	0.999716	97.4	101.4	81662.4	80156.5	91361	82962.4	84941.6	85613.2	74078.7	69711.6	841.9	63899.9	81331.7	82550.4
High	Master Protein	P17967	Protein disulfide-isomerase OS=Saccharomyces cerevisiae (strain ATCC 204508 / S288c) OX=559292 GN=PDI1 PE=1 SV=2	1.363	0.45	0.00620387	117.3	86.1	196152	202829	164081	146186	143914	142955	177936	176399	1512	112597	137798	137841
High	Master Protein	P42945	U3 small nucleolar RNA-associated protein 10 OS=Saccharomyces cerevisiae (strain ATCC 204508 / S288c) OX=559292 GN=UTP10 PE=1 SV=1	0.965	-0.05	0.871842	101.6	105.3	34679.1	34841.4	45316.9	36107.9	36306.1	35589.4	31458.6	30301.3	417.6	27811.3	34763.2	34316.2
High	Master Protein	P22515	Ubiquitin-activating enzyme E1 1 OS=Saccharomyces cerevisiae (strain ATCC 204508 / S288c) OX=559292 GN=UBA1 PE=1 SV=2	0.866	-0.21	0.237613	89.1	102.8	83531.2	82631.7	97207.4	96449.2	97513	93495.6	75774	71864.2	895.8	74287.8	93368.8	90150.8
High	Master Protein	P12709	Glucose-6-phosphate isomerase OS=Saccharomyces cerevisiae (strain ATCC 204508 / S288c) OX=559292 GN=PGI1 PE=1 SV=3	1.021	0.03	0.997029	95.8	93.9	189126	182419	161626	175541	181817	178684	171563	158649	1489.4	135206	174090	172291
High	Master Protein	P38708	Putative proline--tRNA ligase YHR020W OS=Saccharomyces cerevisiae (strain ATCC 204508 / S288c) OX=559292 GN=YHR020W PE=1 SV=1	0.706	-0.5	0.304274	86.7	122.7	87489.2	81764.6	131908	123877	125113	119154	79364.4	71110.1	1215.6	95413.7	119796	114892
High	Master Protein	P07284	Serine--tRNA ligase, cytoplasmic OS=Saccharomyces cerevisiae (strain ATCC 204508 / S288c) OX=559292 GN=SES1 PE=1 SV=2	1.053	0.07	0.273146	101.1	96	108659	105003	125772	104934	103234	99567.3	98568.6	91320.4	1159	80822.7	98846.3	96005.3
High	Master Protein	P16120	Threonine synthase OS=Saccharomyces cerevisiae (strain ATCC 204508 / S288c) OX=559292 GN=THR4 PE=1 SV=1	2.008	1.01	0.137658	156.2	77.8	233137	226060	106583	95886.4	114965	112558	211486	196603	982.2	73854.3	110079	108531
High	Master Protein	P16140	V-type proton ATPase subunit B OS=Saccharomyces cerevisiae (strain ATCC 204508 / S288c) OX=559292 GN=VMA2 PE=1 SV=2	0.819	-0.29	0.120165	89.5	109.3	107233	103570	129286	130925	132492	127884	97274.9	90074.3	1191.4	100842	126861	123309
High	Master Protein	P32454	Aminopeptidase 2, mitochondrial OS=Saccharomyces cerevisiae (strain ATCC 204508 / S288c) OX=559292 GN=APE2 PE=1 SV=4	0.964	-0.05	0.498984	99.8	103.6	80527	83540.8	76580.8	83545	84770.7	81176.9	73048.7	72654.9	705.7	64348.6	81168	78272.8
High	Master Protein	P39730	Eukaryotic translation initiation factor 5B OS=Saccharomyces cerevisiae (strain ATCC 204508 / S288c) OX=559292 GN=FUN12 PE=1 SV=2	1.197	0.26	0.00225194	90.6	75.7	121304	110433	107615	92481	91672.6	92244.5	110039	96043.1	991.7	71231.4	87776.7	88944.5
High	Master Protein	P16862	ATP-dependent 6-phosphofructokinase subunit beta OS=Saccharomyces cerevisiae (strain ATCC 204508 / S288c) OX=559292 GN=PFK2 PE=1 SV=4	0.911	-0.13	0.164069	92.5	101.5	145452	137656	160641	164764	158100	159601	131944	119719	1480.3	126906	151381	153891
High	Master Protein	P38934	Nuclear segregation protein BFR1 OS=Saccharomyces cerevisiae (strain ATCC 204508 / S288c) OX=559292 GN=BFR1 PE=1 SV=1	0.779	-0.36	0.186285	86.7	111.3	110646	111807	147222	143554	146398	142363	100371	97238.2	1356.7	110569	140176	137270
High	Master Protein	P04802	Aspartate--tRNA ligase, cytoplasmic OS=Saccharomyces cerevisiae (strain ATCC 204508 / S288c) OX=559292 GN=DPS1 PE=1 SV=3	1.008	0.01	0.990499	100.2	99.5	134068	127059	114354	130105	126101	123010	121617	110502	1053.8	100210	120742	118610
High	Master Protein	P19657	Plasma membrane ATPase 2 OS=Saccharomyces cerevisiae (strain ATCC 204508 / S288c) OX=559292 GN=PMA2 PE=1 SV=3	0.478	-1.06	0.175775	35.1	73.4	6.1	3.3		9.7	9.4	9.4	5.5	2.9		7.5	9	9
High	Master Protein	P11154	Pyruvate carboxylase 1 OS=Saccharomyces cerevisiae (strain ATCC 204508 / S288c) OX=559292 GN=PYC1 PE=1 SV=2	1.057	0.08	0.953594	73.7	69.8	8273.4	9568.8	6962.5	8129.2	7708	7826.7	7505	8322	64.2	6261.3	7380.4	7546.7
High	Master Protein	P00924	Enolase 1 OS=Saccharomyces cerevisiae (strain ATCC 204508 / S288c) OX=559292 GN=ENO1 PE=1 SV=3	1.919	0.94	0.000143128	107.6	56.1	97844.9	103122	83228.4	50993.2	50734.4	52774.5	88758.4	89684.7	767	39276.4	48578.3	50886.5
High	Master Protein	Q06685	Inositol hexakisphosphate and diphosphoinositol-pentakisphosphate kinase OS=Saccharomyces cerevisiae (strain ATCC 204508 / S288c) OX=559292 GN=VIP1 PE=1 SV=1	0.946	-0.08	0.997555	87.3	92.2	25317.9	25159.5	29855.9	26753.8	26624.2	27367.2	22966.7	21881	275.1	20606.5	25492.7	26388.1
High	Master Protein	P38764	26S proteasome regulatory subunit RPN1 OS=Saccharomyces cerevisiae (strain ATCC 204508 / S288c) OX=559292 GN=RPN1 PE=1 SV=3	1.054	0.08	0.0841975	95.5	90.6	61075.4	63936.5	60697.8	57943.6	59628	57295.8	55403.6	55605.1	559.3	44629.7	57093.9	55246
High	Master Protein	P53852	Cysteine--tRNA ligase OS=Saccharomyces cerevisiae (strain ATCC 204508 / S288c) OX=559292 GN=YNL247W PE=1 SV=1	1	0	0.990354	101.6	101.6	65646.3	66145.8	68167	66113.7	69461.7	65846.4	59549.9	57526.6	628.2	50922.6	66509.6	63490.8
High	Master Protein	P07262	NADP-specific glutamate dehydrogenase 1 OS=Saccharomyces cerevisiae (strain ATCC 204508 / S288c) OX=559292 GN=GDH1 PE=1 SV=2	1.74	0.8	0.120565	136.6	78.5	286930	283648	163504	158622	168353	163010	260284	246687	1506.7	122175	161198	157178
High	Master Protein	P04051	DNA-directed RNA polymerase III subunit RPC1 OS=Saccharomyces cerevisiae (strain ATCC 204508 / S288c) OX=559292 GN=RPO31 PE=1 SV=1	0.916	-0.13	0.881978	96.3	105.2	24514.5	24553.8	46588.3	27824.5	26310.5	26801.4	22237.9	21354.3	429.3	21431.2	25192.4	25842.6
High	Master Protein	P23615	Transcription elongation factor SPT6 OS=Saccharomyces cerevisiae (strain ATCC 204508 / S288c) OX=559292 GN=SPT6 PE=1 SV=1	0.883	-0.18	0.12524	90.6	102.5	47109.9	47483	53149.3	55600.6	53748.8	53217.1	42735	41295.6	489.8	42825.1	51464.5	51313.2
High	Master Protein	P38205	Multisite-specific tRNA:(cytosine-C(5))-methyltransferase OS=Saccharomyces cerevisiae (strain ATCC 204508 / S288c) OX=559292 GN=NCL1 PE=1 SV=1	0.975	-0.04	0.635192	92.9	95.2	54403.5	53855.2	54337.9	55721.1	56005.4	54638.2	49351.2	46837.5	500.7	42917.9	53625.3	52683.5
High	Master Protein	P14540	Fructose-bisphosphate aldolase OS=Saccharomyces cerevisiae (strain ATCC 204508 / S288c) OX=559292 GN=FBA1 PE=1 SV=3	0.61	-0.71	0.154846	73.8	120.9	224603	210227	368424	367986	372108	345534	203745	182833	3395.1	283433	356294	333172
High	Master Protein	P00958	Methionine--tRNA ligase, cytoplasmic OS=Saccharomyces cerevisiae (strain ATCC 204508 / S288c) OX=559292 GN=MES1 PE=1 SV=4	1.053	0.08	0.205174	104.4	99.1	116416	111207	128992	110504	111049	108044	105605	96716.2	1188.7	85113.6	106330	104179
High	Master Protein	P39960	GTPase-activating protein BEM2/IPL2 OS=Saccharomyces cerevisiae (strain ATCC 204508 / S288c) OX=559292 GN=BEM2 PE=1 SV=1	0.94	-0.09	0.824062	98.4	104.7	17633.2	18123.7	20341.6	20409.2	19273.4	18787	15995.7	15762.1	187.5	15719.7	18454.3	18114.9
High	Master Protein	Q03640	Tricalbin-3 OS=Saccharomyces cerevisiae (strain ATCC 204508 / S288c) OX=559292 GN=TCB3 PE=1 SV=1	1.015	0.02	0.617523	101.5	100	33858.3	32307.7	40225	33364.2	33542.1	32142.1	30714	28097.8	370.7	25698	32116.6	30992.2
High	Master Protein	P22138	DNA-directed RNA polymerase I subunit RPA135 OS=Saccharomyces cerevisiae (strain ATCC 204508 / S288c) OX=559292 GN=RPA135 PE=1 SV=1	1.037	0.05	0.969999	104.1	100.4	55968.8	54493.3	45214.3	54226.4	52531.7	51901.3	50771.2	47392.5	416.7	41766.6	50299.2	50044.6
High	Master Protein	P00830	ATP synthase subunit beta, mitochondrial OS=Saccharomyces cerevisiae (strain ATCC 204508 / S288c) OX=559292 GN=ATP2 PE=1 SV=2	1.011	0.02	0.999726	92.2	91.2	86249.5	93940.4	97691.3	92932	94352.2	89528.8	78239.8	81699.3	900.2	71578.7	90342.4	86325.9
High	Master Protein	P07342	Acetolactate synthase catalytic subunit, mitochondrial OS=Saccharomyces cerevisiae (strain ATCC 204508 / S288c) OX=559292 GN=ILV2 PE=1 SV=1	1.408	0.49	0.0157689	124.4	88.4	154026	143039	113669	96943.1	101921	101607	139722	124400	1047.5	74668.2	97589.1	97971.8
High	Master Protein	P14126	60S ribosomal protein L3 OS=Saccharomyces cerevisiae (strain ATCC 204508 / S288c) OX=559292 GN=RPL3 PE=1 SV=4	0.921	-0.12	0.149259	100	108.5	465290	451068	395830	475556	489590	529431	422080	392291	3647.7	366286	468783	510490
High	Master Protein	P21576	Vacuolar protein sorting-associated protein 1 OS=Saccharomyces cerevisiae (strain ATCC 204508 / S288c) OX=559292 GN=VPS1 PE=1 SV=2	1.054	0.08	0.0549407	98.7	93.6	63345.1	64405.2	69573	61084.1	61496.7	60211.3	57462.5	56012.8	641.1	47048.6	58883.2	58057.3
High	Master Protein	Q05050	Eisosome protein 1 OS=Saccharomyces cerevisiae (strain ATCC 204508 / S288c) OX=559292 GN=EIS1 PE=1 SV=1	1.329	0.41	0.0566695	108.7	81.8	36897.2	37914.5	29018	28292.7	27763.2	27673.3	33470.7	32974	267.4	21791.8	26583.3	26683.3
High	Master Protein	P53622	Coatomer subunit alpha OS=Saccharomyces cerevisiae (strain ATCC 204508 / S288c) OX=559292 GN=COP1 PE=1 SV=2	1.039	0.05	0.997573	98.5	94.9	69182.3	68495.4	62575.9	67401.9	65945.9	65753.8	62757.6	59570	576.6	51914.7	63143.3	63401.4
High	Master Protein	P25384	Transposon Ty2-C Gag-Pol polyprotein OS=Saccharomyces cerevisiae (strain ATCC 204508 / S288c) OX=559292 GN=TY2B-C PE=3 SV=2	0.512	-0.97	6.36538e-06	74.7	145.9	17280.1	19801.7	20767.1	38689.8	39414.3	38000.5	15675.4	17221.4	191.4	29799.9	37739.2	36641
High	Master Protein	P38737	Proteasome component ECM29 OS=Saccharomyces cerevisiae (strain ATCC 204508 / S288c) OX=559292 GN=ECM29 PE=1 SV=1	1.132	0.18	0.0658908	105	92.7	20829.4	22160.1	25653.7	19575.6	19795.2	19471.5	18895	19272.5	236.4	15077.7	18953.9	18774.9
High	Master Protein	P06168	Ketol-acid reductoisomerase, mitochondrial OS=Saccharomyces cerevisiae (strain ATCC 204508 / S288c) OX=559292 GN=ILV5 PE=1 SV=1	1.735	0.79	0.0208097	122.9	70.9	298697	274752	188440	152509	167268	158374	270958	238950	1736.5	117466	160160	152708
High	Master Protein	P25386	Intracellular protein transport protein USO1 OS=Saccharomyces cerevisiae (strain ATCC 204508 / S288c) OX=559292 GN=USO1 PE=1 SV=2	0.858	-0.22	0.0436037	99.1	115.5	14451	14847.4	16612.5	17825.4	17109.9	17308	13109	12912.7	153.1	13729.6	16382.8	16688.8
High	Master Protein	P22202	Heat shock protein SSA4 OS=Saccharomyces cerevisiae (strain ATCC 204508 / S288c) OX=559292 GN=SSA4 PE=1 SV=3	1.499	0.58	0.000401481	83.5	55.7	10660.4	12142.7	12947.2	8403.8	8097.9	7725.1	9670.4	10560.4	119.3	6472.8	7753.7	7448.8
High	Master Protein	P37898	Alanine/arginine aminopeptidase OS=Saccharomyces cerevisiae (strain ATCC 204508 / S288c) OX=559292 GN=AAP1 PE=1 SV=2	0.677	-0.56	0.00428708	84.1	124.2	38296.4	38280.2	47819.7	56565.6	58159.9	56016.2	34740	33292.1	440.7	43568.4	55688.2	54012.2
High	Master Protein	P10081	ATP-dependent RNA helicase eIF4A OS=Saccharomyces cerevisiae (strain ATCC 204508 / S288c) OX=559292 GN=TIF1 PE=1 SV=3	0.647	-0.63	0.309972	77.6	119.8	149804	148293	258192	244230	231453	226190	135892	128969	2379.3	188112	221617	218098
High	Master Protein	P07213	Mitochondrial import receptor subunit TOM70 OS=Saccharomyces cerevisiae (strain ATCC 204508 / S288c) OX=559292 GN=TOM70 PE=1 SV=2	1.168	0.22	0.000315495	104.4	89.4	74673.6	74902.2	80799.7	64556.7	63782.6	64111.2	67738.9	65142	744.6	49723.3	61072	61817.6
High	Master Protein	P04806	Hexokinase-1 OS=Saccharomyces cerevisiae (strain ATCC 204508 / S288c) OX=559292 GN=HXK1 PE=1 SV=2	2.069	1.05	7.27015e-07	115.2	55.7	105602	112250	96811.9	51575.6	51050.3	48011.3	95794.9	97623.5	892.1	39724.9	48880.8	46293.7
High	Master Protein	P14742	Glutamine--fructose-6-phosphate aminotransferase [isomerizing] OS=Saccharomyces cerevisiae (strain ATCC 204508 / S288c) OX=559292 GN=GFA1 PE=1 SV=4	1.307	0.39	0.00386816	101.2	77.4	82675.8	89601.9	74084.5	66252.1	63272.5	62449.5	74998	77926.2	682.7	51029.2	60583.5	60215.3
High	Master Protein	P32074	Coatomer subunit gamma OS=Saccharomyces cerevisiae (strain ATCC 204508 / S288c) OX=559292 GN=SEC21 PE=1 SV=2	0.898	-0.15	0.112566	91.1	101.4	47507.3	48309.8	52005.1	53906.1	53776.3	52282.5	43095.4	42014.7	479.2	41520	51490.9	50412.1
High	Master Protein	Q12118	Small glutamine-rich tetratricopeptide repeat-containing protein 2 OS=Saccharomyces cerevisiae (strain ATCC 204508 / S288c) OX=559292 GN=SGT2 PE=1 SV=1	0.725	-0.46	0.00201624	92.2	127.3	74932	81716.1	93611.4	112751	111395	120000	67973.3	71068	862.6	86844.1	106661	115707
High	Master Protein	Q03280	E3 ubiquitin-protein ligase TOM1 OS=Saccharomyces cerevisiae (strain ATCC 204508 / S288c) OX=559292 GN=TOM1 PE=1 SV=1	1.249	0.32	0.240993	118.6	94.9	26070.5	27285.1	20471.2	21562.7	20868.1	20630.5	23649.4	23729.7	188.6	16608.2	19981.3	19892.4
High	Master Protein	P40024	ABC transporter ATP-binding protein ARB1 OS=Saccharomyces cerevisiae (strain ATCC 204508 / S288c) OX=559292 GN=ARB1 PE=1 SV=1	0.804	-0.32	0.00170851	87.3	108.6	71388.4	68227	77117.9	90760.4	88814.7	87004.8	64758.8	59336.6	710.7	69906.1	85040.2	83892.2
High	Master Protein	Q00402	Nuclear migration protein NUM1 OS=Saccharomyces cerevisiae (strain ATCC 204508 / S288c) OX=559292 GN=NUM1 PE=1 SV=2	1.129	0.18	0.977648	111.8	99	23189.2	21720	15482.8	18236.2	19818.3	19238.4	21035.7	18889.7	142.7	14046.1	18976	18550.2
High	Master Protein	Q03494	Transposon Ty2-DR2 Gag-Pol polyprotein OS=Saccharomyces cerevisiae (strain ATCC 204508 / S288c) OX=559292 GN=TY2B-DR2 PE=3 SV=2	0.586	-0.77	0.976644	81.5	139.1	147.3	170.2	608.3	290.5	310.4	257.5	133.7	148	5.6	223.8	297.2	248.3
High	Master Protein	P00815	Histidine biosynthesis trifunctional protein OS=Saccharomyces cerevisiae (strain ATCC 204508 / S288c) OX=559292 GN=HIS4 PE=1 SV=3	3.033	1.6	0.0122389	169	55.7	99544.3	77730.3	38604.8	24913.1	25625.2	25943.5	90299.9	67601.5	355.8	19188.7	24536.1	25015.3
High	Master Protein	Q12472	Transposon Ty2-DR1 Gag-Pol polyprotein OS=Saccharomyces cerevisiae (strain ATCC 204508 / S288c) OX=559292 GN=TY2B-DR1 PE=1 SV=3	0.597	-0.75	0.0133023	72.7	121.9	47.1	52.9		74.3	83.8	87.3	42.8	46		57.2	80.2	84.2
High	Master Protein	P33416	Heat shock protein 78, mitochondrial OS=Saccharomyces cerevisiae (strain ATCC 204508 / S288c) OX=559292 GN=HSP78 PE=1 SV=2	1.847	0.89	0.0137848	121.8	66	59593.7	62770.6	39548.6	33754.3	32259.5	31111.9	54059.4	54591.1	364.4	25998.5	30888.6	29998.9
High	Master Protein	P00931	Tryptophan synthase OS=Saccharomyces cerevisiae (strain ATCC 204508 / S288c) OX=559292 GN=TRP5 PE=1 SV=1	1.402	0.49	0.318712	118.6	84.6	117395	106557	70713.2	75976.6	78961	76011.8	106493	92672.3	651.6	58519.3	75605.3	73292.5
High	Master Protein	P06738	Glycogen phosphorylase OS=Saccharomyces cerevisiae (strain ATCC 204508 / S288c) OX=559292 GN=GPH1 PE=1 SV=4	2.403	1.26	0.00309339	112.7	46.9	68382.2	78046.7	43775.7	29377	28456.7	28137	62031.8	67876.7	403.4	22627	27247.4	27130.4
High	Master Protein	P06103	Eukaryotic translation initiation factor 3 subunit B OS=Saccharomyces cerevisiae (strain ATCC 204508 / S288c) OX=559292 GN=PRT1 PE=1 SV=1	0.93	-0.11	0.0331924	92.8	99.8	106226	101039	102694	110472	112448	108224	96361	87873.2	946.3	85088.5	107669	104352
High	Master Protein	P35194	U3 small nucleolar RNA-associated protein 20 OS=Saccharomyces cerevisiae (strain ATCC 204508 / S288c) OX=559292 GN=UTP20 PE=1 SV=3	0.771	-0.38	0.125047	92	119.3	25258.5	26703.8	34237.6	34838.4	34636.3	34276.2	22912.8	23224.1	315.5	26833.5	33164.3	33050
High	Master Protein	P39986	Manganese-transporting ATPase 1 OS=Saccharomyces cerevisiae (strain ATCC 204508 / S288c) OX=559292 GN=SPF1 PE=1 SV=1	0.92	-0.12	0.997444	91.5	99.5	61904.5	58073.6	80762.9	67315.2	68544.7	65742.5	56155.6	50506.2	744.2	51848	65631.7	63390.6
High	Master Protein	P39935	Eukaryotic initiation factor 4F subunit p150 OS=Saccharomyces cerevisiae (strain ATCC 204508 / S288c) OX=559292 GN=TIF4631 PE=1 SV=2	1.006	0.01	0.998997	109.5	108.9	78433.4	74456.9	68296.3	73449.4	74026.2	74352.7	71149.5	64754.7	629.4	56572.7	70880.2	71692.7
High	Master Protein	P21524	Ribonucleoside-diphosphate reductase large chain 1 OS=Saccharomyces cerevisiae (strain ATCC 204508 / S288c) OX=559292 GN=RNR1 PE=1 SV=2	0.983	-0.03	0.954871	92.6	94.2	51993.7	49394.8	48326.2	49910.7	50273.8	51253.9	47165.2	42958.4	445.3	38442.6	48137.3	49420.3
High	Master Protein	P11075	Protein transport protein SEC7 OS=Saccharomyces cerevisiae (strain ATCC 204508 / S288c) OX=559292 GN=SEC7 PE=1 SV=2	0.9	-0.15	0.0192305	96.5	107.3	34266.8	35494.1	34278.4	36956.4	38375.4	38098.8	31084.5	30869	315.9	28464.8	36744.5	36735.8
High	Master Protein	P38625	GMP synthase [glutamine-hydrolyzing] OS=Saccharomyces cerevisiae (strain ATCC 204508 / S288c) OX=559292 GN=GUA1 PE=1 SV=4	0.679	-0.56	0.0231287	84.8	124.8	89971.8	86684.5	120582	138929	132413	131711	81616.4	75388.9	1111.2	107007	126786	126999
High	Master Protein	P49089	Asparagine synthetase [glutamine-hydrolyzing] 1 OS=Saccharomyces cerevisiae (strain ATCC 204508 / S288c) OX=559292 GN=ASN1 PE=1 SV=2	1.47	0.56	0.121675	123.9	84.3	206106	187701	128229	127285	127671	128121	186966	163243	1181.7	98038.4	122245	123538
High	Master Protein	P38219	Obg-like ATPase 1 OS=Saccharomyces cerevisiae (strain ATCC 204508 / S288c) OX=559292 GN=OLA1 PE=1 SV=1	0.853	-0.23	0.401179	92.4	108.4	112555	103578	138589	133407	132007	128238	102103	90080.8	1277.1	102754	126397	123650
High	Master Protein	P12945	N-terminal acetyltransferase A complex subunit NAT1 OS=Saccharomyces cerevisiae (strain ATCC 204508 / S288c) OX=559292 GN=NAT1 PE=1 SV=2	1.103	0.14	0.0618537	108.7	98.5	53254.5	51992.1	61707.5	49669.4	48267.2	46445.9	48309	45217.1	568.6	38256.7	46215.9	44784.3
High	Master Protein	P60010	Actin OS=Saccharomyces cerevisiae (strain ATCC 204508 / S288c) OX=559292 GN=ACT1 PE=1 SV=1	0.849	-0.24	0.415206	88.4	104.1	253387	253648	316267	309754	298690	294130	229856	220596	2914.5	238581	285996	283607
High	Master Protein	P23254	Transketolase 1 OS=Saccharomyces cerevisiae (strain ATCC 204508 / S288c) OX=559292 GN=TKL1 PE=1 SV=4	0.543	-0.88	0.0291103	71.2	131.1	115170	98748.3	179270	212099	221887	205197	104474	85880.8	1652	163364	212457	197856
High	Master Protein	P39076	T-complex protein 1 subunit beta OS=Saccharomyces cerevisiae (strain ATCC 204508 / S288c) OX=559292 GN=CCT2 PE=1 SV=1	0.938	-0.09	0.849373	94.3	100.5	53554.1	48935.9	61928.9	57884.8	55874.5	57070.9	48580.7	42559.3	570.7	44584.4	53499.9	55029.2
High	Master Protein	P32528	Urea amidolyase OS=Saccharomyces cerevisiae (strain ATCC 204508 / S288c) OX=559292 GN=DUR1,2 PE=1 SV=2	1.302	0.38	0.00024503	104.1	80	18306.6	16955.2	18915.5	14066.1	13993.5	14063.3	16606.5	14745.8	174.3	10834.1	13398.8	13560.1
High	Master Protein	P15891	Actin-binding protein OS=Saccharomyces cerevisiae (strain ATCC 204508 / S288c) OX=559292 GN=ABP1 PE=1 SV=4	2.171	1.12	0.0612007	161.7	74.5	120810	119410	60873.1	51736.3	54990.3	59359.4	109591	103850	561	39848.7	52653.3	57235.9
High	Master Protein	P07244	Bifunctional purine biosynthetic protein ADE5,7 OS=Saccharomyces cerevisiae (strain ATCC 204508 / S288c) OX=559292 GN=ADE5,7 PE=1 SV=1	1	0	0.867402	97.6	97.6	53881.2	51902.8	46255.3	52082.4	51915.7	51841.6	48877.4	45139.5	426.3	40115.3	49709.4	49986.9
High	Master Protein	P07263	Histidine--tRNA ligase, mitochondrial OS=Saccharomyces cerevisiae (strain ATCC 204508 / S288c) OX=559292 GN=HTS1 PE=1 SV=2	0.91	-0.14	0.956327	94.9	104.3	63731.8	59747.6	80592.1	72125.7	70049.1	67832.8	57813.2	51962.1	742.7	55553.2	67072.1	65406.1
High	Master Protein	P00360	Glyceraldehyde-3-phosphate dehydrogenase 1 OS=Saccharomyces cerevisiae (strain ATCC 204508 / S288c) OX=559292 GN=TDH1 PE=1 SV=3	0.991	-0.01	0.957242	66.6	67.2	25029.2	29256	40731.3	29507.8	28976.4	29537.5	22704.8	25443.8	375.3	22727.7	27744.9	28480.8
High	Master Protein	P09624	Dihydrolipoyl dehydrogenase, mitochondrial OS=Saccharomyces cerevisiae (strain ATCC 204508 / S288c) OX=559292 GN=LPD1 PE=1 SV=1	1.277	0.35	0.136214	108.5	85	96429.6	95027.9	73675.2	74432.2	74975.1	72640.3	87474.5	82645.2	678.9	57329.7	71788.8	70041.6
High	Master Protein	P39522	Dihydroxy-acid dehydratase, mitochondrial OS=Saccharomyces cerevisiae (strain ATCC 204508 / S288c) OX=559292 GN=ILV3 PE=1 SV=2	1.137	0.18	0.351962	107.5	94.6	127069	115840	98234	101918	102655	100558	115269	100746	905.2	78500.3	98292.4	96960.2
High	Master Protein	P07251	ATP synthase subunit alpha, mitochondrial OS=Saccharomyces cerevisiae (strain ATCC 204508 / S288c) OX=559292 GN=ATP1 PE=1 SV=5	1.173	0.23	0.188804	98.5	83.9	111073	117773	96094.2	99787.9	93977.6	94669.5	100758	102426	885.5	76859.4	89983.7	91282.7
High	Master Protein	P05453	Eukaryotic peptide chain release factor GTP-binding subunit OS=Saccharomyces cerevisiae (strain ATCC 204508 / S288c) OX=559292 GN=SUP35 PE=1 SV=1	1.048	0.07	0.724465	97.2	92.8	77361	69183	99551.2	73432.3	75322.6	73804.5	70176.7	60168	917.4	56559.5	72121.5	71164.2
High	Master Protein	P41810	Coatomer subunit beta OS=Saccharomyces cerevisiae (strain ATCC 204508 / S288c) OX=559292 GN=SEC26 PE=1 SV=2	0.978	-0.03	0.99973	97.6	99.8	51342.5	51757.2	54810.2	52941.5	53079.2	52101.3	46574.5	45012.9	505.1	40777	50823.4	50237.4
High	Master Protein	P27692	Transcription elongation factor SPT5 OS=Saccharomyces cerevisiae (strain ATCC 204508 / S288c) OX=559292 GN=SPT5 PE=1 SV=1	1.019	0.03	0.888937	103.5	101.6	44748.8	44348.6	43127.5	43515.2	44110.9	43284.6	40593.1	38569.7	397.4	33516.6	42236.3	41736.1
High	Master Protein	P32386	ATP-dependent bile acid permease OS=Saccharomyces cerevisiae (strain ATCC 204508 / S288c) OX=559292 GN=YBT1 PE=1 SV=2	1.089	0.12	0.0823119	106.3	97.6	46587.9	44764.4	42560.4	41813.6	41099.7	40048.6	42261.4	38931.3	392.2	32206	39353	38615.9
High	Master Protein	P53254	U3 small nucleolar RNA-associated protein 22 OS=Saccharomyces cerevisiae (strain ATCC 204508 / S288c) OX=559292 GN=UTP22 PE=1 SV=1	0.886	-0.18	0.761247	93.9	106	37656.6	37841.6	47029.2	43652.9	42724	42654.3	34159.6	32910.6	433.4	33622.7	40908.3	41128.4
High	Master Protein	P53914	RNA cytidine acetyltransferase OS=Saccharomyces cerevisiae (strain ATCC 204508 / S288c) OX=559292 GN=KRE33 PE=1 SV=1	1.141	0.19	0.955451	106.2	93.1	44766.7	43492.1	32103.5	38915.7	37257.9	38132.5	40609.4	37824.8	295.8	29973.9	35674.5	36768.4
High	Master Protein	P50095	Inosine-5'-monophosphate dehydrogenase 3 OS=Saccharomyces cerevisiae (strain ATCC 204508 / S288c) OX=559292 GN=IMD3 PE=1 SV=1	0.768	-0.38	0.0193407	89.4	116.5	39532.2	38155.9	46420.3	49108.8	54725.4	51493.6	35861	33183.9	427.8	37824.9	52399.7	49651.4
High	Master Protein	P32497	Eukaryotic translation initiation factor 3 subunit C OS=Saccharomyces cerevisiae (strain ATCC 204508 / S288c) OX=559292 GN=NIP1 PE=1 SV=2	0.955	-0.07	0.981819	94.8	99.2	76584.9	71637.3	90493.5	84255.2	80173	78156.3	69472.7	62302.5	833.9	64895.7	76765.8	75360.3
High	Master Protein	P39676	Flavohemoprotein OS=Saccharomyces cerevisiae (strain ATCC 204508 / S288c) OX=559292 GN=YHB1 PE=1 SV=2	1.116	0.16	0.134223	110.7	99.1	115285	121254	105525	103273	103932	100204	104579	105453	972.4	79543.7	99515	96619.6
High	Master Protein	P48415	COPII coat assembly protein SEC16 OS=Saccharomyces cerevisiae (strain ATCC 204508 / S288c) OX=559292 GN=SEC16 PE=1 SV=2	0.909	-0.14	0.050964	97.1	106.7	13206.8	13834.1	13158.2	14035.3	14524.2	15016.6	11980.3	12031.4	121.3	10810.4	13906.9	14479.4
High	Master Protein	P08518	DNA-directed RNA polymerase II subunit RPB2 OS=Saccharomyces cerevisiae (strain ATCC 204508 / S288c) OX=559292 GN=RPB2 PE=1 SV=2	0.964	-0.05	0.913862	101.2	105.1	39128.9	39960.9	42980.3	41615.6	41474	40840.8	35495.2	34753.7	396.1	32053.4	39711.4	39379.7
High	Master Protein	Q12460	Nucleolar protein 56 OS=Saccharomyces cerevisiae (strain ATCC 204508 / S288c) OX=559292 GN=NOP56 PE=1 SV=1	0.965	-0.05	0.323191	91	94.3	79533	70913	79934.8	86190.2	82446.3	79415	72147.1	61672.5	736.6	66386.1	78942.4	76573.9
High	Master Protein	P15019	Transaldolase OS=Saccharomyces cerevisiae (strain ATCC 204508 / S288c) OX=559292 GN=TAL1 PE=1 SV=4	0.601	-0.74	0.472329	63.7	106	99127.1	100516	208767	176900	166352	167360	89921.5	87418.4	1923.8	136253	159282	161373
High	Master Protein	P39077	T-complex protein 1 subunit gamma OS=Saccharomyces cerevisiae (strain ATCC 204508 / S288c) OX=559292 GN=CCT3 PE=1 SV=2	0.93	-0.1	0.0105299	92.1	99	68089.6	66760.6	70158.9	75222.1	73151.7	73178	61766.4	58061.3	646.5	57938.1	70042.9	70560.1
High	Master Protein	P30624	Long-chain-fatty-acid--CoA ligase 1 OS=Saccharomyces cerevisiae (strain ATCC 204508 / S288c) OX=559292 GN=FAA1 PE=1 SV=1	1.599	0.68	0.00983177	107.2	67.1	90641.2	95224.7	66853.6	56680.7	56871.4	55539.3	82223.7	82816.3	616.1	43657	54454.4	53552.4
High	Master Protein	P41940	Mannose-1-phosphate guanyltransferase OS=Saccharomyces cerevisiae (strain ATCC 204508 / S288c) OX=559292 GN=PSA1 PE=1 SV=2	1.135	0.18	0.282192	95.7	84.4	160812	141849	122436	126117	123739	124987	145878	123365	1128.3	97138.6	118480	120516
High	Master Protein	P38707	Asparagine--tRNA ligase, cytoplasmic OS=Saccharomyces cerevisiae (strain ATCC 204508 / S288c) OX=559292 GN=DED81 PE=1 SV=1	1.084	0.12	0.674827	108.9	100.4	106169	99875.8	86153.4	90522.2	93064.1	92105.7	96309.7	86861.3	793.9	69722.7	89109.1	88810.6
High	Master Protein	P47079	T-complex protein 1 subunit theta OS=Saccharomyces cerevisiae (strain ATCC 204508 / S288c) OX=559292 GN=CCT8 PE=1 SV=1	1.002	0	0.977589	94.8	94.6	64169.1	61426	64647.4	65176	64046.1	62502.7	58209.9	53421.8	595.7	50200.4	61324.2	60266.7
High	Master Protein	P09440	C-1-tetrahydrofolate synthase, mitochondrial OS=Saccharomyces cerevisiae (strain ATCC 204508 / S288c) OX=559292 GN=MIS1 PE=1 SV=1	0.891	-0.17	0.459849	99.6	111.8	53154.7	53454.6	62792.9	59846.8	60702.6	60002.7	48218.4	46489.1	578.6	46095.6	58122.8	57856.1
High	Master Protein	P49090	Asparagine synthetase [glutamine-hydrolyzing] 2 OS=Saccharomyces cerevisiae (strain ATCC 204508 / S288c) OX=559292 GN=ASN2 PE=1 SV=2	1.155	0.21	0.103715	104.4	90.3	69809.2	68778.9	59860.9	60123.4	59538.6	57206.6	63326.2	59816.6	551.6	46308.7	57008.3	55160
High	Master Protein	P40010	Nuclear GTP-binding protein NUG1 OS=Saccharomyces cerevisiae (strain ATCC 204508 / S288c) OX=559292 GN=NUG1 PE=1 SV=1	0.799	-0.32	0.812555	80.1	100.2	29964.9	30239.8	45173	38736.2	37836.6	36928.7	27182.2	26299.4	416.3	29835.7	36228.6	35607.5
High	Master Protein	P32521	Actin cytoskeleton-regulatory complex protein PAN1 OS=Saccharomyces cerevisiae (strain ATCC 204508 / S288c) OX=559292 GN=PAN1 PE=1 SV=2	1.222	0.29	0.00372394	93.8	76.8	27738.8	28531.6	28770	23355	25882.6	22898.2	25162.8	24813.7	265.1	17988.7	24782.6	22079.1
High	Master Protein	P38968	Protein transport protein SEC31 OS=Saccharomyces cerevisiae (strain ATCC 204508 / S288c) OX=559292 GN=SEC31 PE=1 SV=3	0.919	-0.12	0.752904	92.5	100.7	46074.6	46989.2	54276.9	51137.7	52676.8	49904.3	41795.8	40866.2	500.2	39387.7	50438.1	48119
High	Master Protein	P00330	Alcohol dehydrogenase 1 OS=Saccharomyces cerevisiae (strain ATCC 204508 / S288c) OX=559292 GN=ADH1 PE=1 SV=5	0.723	-0.47	0.0332697	82.5	114.2	460538	414680	566036	637398	651743	585104	417769	360645	5216.1	490942	624045	564172
High	Master Protein	P46367	Potassium-activated aldehyde dehydrogenase, mitochondrial OS=Saccharomyces cerevisiae (strain ATCC 204508 / S288c) OX=559292 GN=ALD4 PE=1 SV=2	1.865	0.9	0.000513526	93.7	50.3	48976.4	61834.6	63492	34290.7	33157.9	30943.5	44428.1	53777.2	585.1	26411.7	31748.7	29836.5
High	Master Protein	P36421	Tyrosine--tRNA ligase, cytoplasmic OS=Saccharomyces cerevisiae (strain ATCC 204508 / S288c) OX=559292 GN=TYS1 PE=1 SV=3	1.269	0.34	0.0922468	102.4	80.7	103295	90574.4	74041.8	72312.2	70776.1	71395.5	93702	78772	682.3	55696.8	67768.2	68841.3
High	Master Protein	P12385	Eukaryotic peptide chain release factor subunit 1 OS=Saccharomyces cerevisiae (strain ATCC 204508 / S288c) OX=559292 GN=SUP45 PE=1 SV=2	0.951	-0.07	0.243588	92.1	96.9	94070.4	84075.4	95859	100437	98952.6	95336.1	85334.4	73119.8	883.4	77359.3	94747.3	91925.4
High	Master Protein	P39976	D-2-hydroxyglutarate--pyruvate transhydrogenase DLD3 OS=Saccharomyces cerevisiae (strain ATCC 204508 / S288c) OX=559292 GN=DLD3 PE=1 SV=1	0.948	-0.08	0.891407	81	85.5	62892.8	59251.8	71144	66958.6	66348.9	65453.6	57052.2	51530.9	655.6	51573.4	63529.2	63112
High	Master Protein	P32499	Nucleoporin NUP2 OS=Saccharomyces cerevisiae (strain ATCC 204508 / S288c) OX=559292 GN=NUP2 PE=1 SV=2	1.017	0.02	0.848776	98.1	96.5	36912.9	36332.8	39177	36293	37847.2	36046.2	33484.9	31598.4	361	27953.8	36238.7	34756.7
High	Master Protein	P47035	Nucleolar protein NET1 OS=Saccharomyces cerevisiae (strain ATCC 204508 / S288c) OX=559292 GN=NET1 PE=1 SV=1	0.998	0	0.935567	99.8	100	17785.5	18052.2	19186.6	17985.8	18088.6	18335.1	16133.8	15699.9	176.8	13853.1	17319.9	17679.2
High	Master Protein	P07257	Cytochrome b-c1 complex subunit 2, mitochondrial OS=Saccharomyces cerevisiae (strain ATCC 204508 / S288c) OX=559292 GN=QCR2 PE=1 SV=1	1.106	0.15	0.104677	88.8	80.3	72925.4	75109.8	93518.3	69674.6	67892.1	65548	66153.1	65322.5	861.8	53665.3	65006.8	63203
High	Master Protein	P36775	Lon protease homolog, mitochondrial OS=Saccharomyces cerevisiae (strain ATCC 204508 / S288c) OX=559292 GN=PIM1 PE=1 SV=2	1.067	0.09	0.999754	103	96.6	30203.2	32034.5	23670.2	29159	28318.6	27219.8	27398.4	27860.2	218.1	22459	27115.1	26246
High	Master Protein	P47120	Deoxyhypusine hydroxylase OS=Saccharomyces cerevisiae (strain ATCC 204508 / S288c) OX=559292 GN=LIA1 PE=1 SV=1	0.689	-0.54	0.00425452	90.2	130.9	69134.1	70085.4	85799.1	101674	98086.1	108777	62713.9	60952.8	790.7	78311.9	93917.6	104886
High	Master Protein	P43585	Vacuolar transporter chaperone 2 OS=Saccharomyces cerevisiae (strain ATCC 204508 / S288c) OX=559292 GN=VTC2 PE=1 SV=1	0.696	-0.52	0.357118	75	107.8	36162.4	36429.6	57023.5	50615.6	52673.2	52306	32804.1	31682.6	525.5	38985.5	50434.7	50434.8
High	Master Protein	P28274	CTP synthase 1 OS=Saccharomyces cerevisiae (strain ATCC 204508 / S288c) OX=559292 GN=URA7 PE=1 SV=2	1.049	0.07	0.390942	102	97.2	68516.1	65457.8	76106	67642.9	65328.4	63679.3	62153.2	56928.2	701.3	52100.4	62552	61401.2
High	Master Protein	P39015	Suppressor protein STM1 OS=Saccharomyces cerevisiae (strain ATCC 204508 / S288c) OX=559292 GN=STM1 PE=1 SV=3	1.098	0.13	0.91446	112.2	102.2	152694	145310	119592	132332	131425	135237	138514	126375	1102.1	101926	125840	130399
High	Master Protein	Q07527	tRNA (guanosine(18)-2'-O)-methyltransferase OS=Saccharomyces cerevisiae (strain ATCC 204508 / S288c) OX=559292 GN=TRM3 PE=1 SV=1	1.073	0.1	0.98352	109.2	101.8	17575.5	17953.3	12705.2	16386.5	16750.4	16027.2	15943.3	15613.9	117.1	12621.4	16038.5	15453.8
High	Master Protein	P23201	Protein SPA2 OS=Saccharomyces cerevisiae (strain ATCC 204508 / S288c) OX=559292 GN=SPA2 PE=1 SV=1	0.966	-0.05	0.753895	101.2	104.8	17306.9	17110.1	28498.6	18646.8	17009.5	17920.7	15699.6	14880.6	262.6	14362.3	16286.6	17279.6
High	Master Protein	P50094	Inosine-5'-monophosphate dehydrogenase 4 OS=Saccharomyces cerevisiae (strain ATCC 204508 / S288c) OX=559292 GN=IMD4 PE=1 SV=1	0.679	-0.56	0.00219963	89	131.2	63178.4	64335.3	76098.4	94796.8	98760	94782.8	57311.2	55952	701.3	73015.1	94562.8	91391.9
High	Master Protein	P49687	Nucleoporin NUP145 OS=Saccharomyces cerevisiae (strain ATCC 204508 / S288c) OX=559292 GN=NUP145 PE=1 SV=1	0.951	-0.07	0.989534	97.9	102.9	17574.4	18248.2	21536.2	19178.7	19989	18873	15942.3	15870.4	198.5	14772	19139.5	18197.8
High	Master Protein	P47068	Myosin tail region-interacting protein MTI1 OS=Saccharomyces cerevisiae (strain ATCC 204508 / S288c) OX=559292 GN=BBC1 PE=1 SV=2	1.538	0.62	0.0011579	107.4	69.8	37811.9	38727.2	30990.9	24648.4	24591.4	23813.3	34300.5	33680.8	285.6	18984.8	23546.3	22961.4
High	Master Protein	Q06704	Golgin IMH1 OS=Saccharomyces cerevisiae (strain ATCC 204508 / S288c) OX=559292 GN=IMH1 PE=1 SV=1	1.189	0.25	0.000628643	102.4	86.2	14097.7	15117.6	13760.2	11645	12098.1	11859.3	12788.5	13147.7	126.8	8969.3	11583.9	11435.1
High	Master Protein	P40477	Nucleoporin NUP159 OS=Saccharomyces cerevisiae (strain ATCC 204508 / S288c) OX=559292 GN=NUP159 PE=1 SV=1	1.125	0.17	0.452953	110.9	98.5	20501.3	20958.9	17567.3	18217.4	18090.5	18515.1	18597.4	18227.8	161.9	14031.5	17321.7	17852.7
High	Master Protein	P24783	ATP-dependent RNA helicase DBP2 OS=Saccharomyces cerevisiae (strain ATCC 204508 / S288c) OX=559292 GN=DBP2 PE=1 SV=1	0.831	-0.27	0.223143	94.4	113.6	56737.9	54049.2	68582.6	71236.5	68243.6	66417.1	51468.8	47006.3	632	54868.3	65343.4	64041.1
High	Master Protein	P32481	Eukaryotic translation initiation factor 2 subunit gamma OS=Saccharomyces cerevisiae (strain ATCC 204508 / S288c) OX=559292 GN=GCD11 PE=1 SV=1	1.002	0	0.98892	99.2	99	91327.9	84839.6	96042.5	91959	91148.7	91066.8	82846.6	73784.5	885	70829.3	87275	87808.9
High	Master Protein	P34167	Eukaryotic translation initiation factor 4B OS=Saccharomyces cerevisiae (strain ATCC 204508 / S288c) OX=559292 GN=TIF3 PE=1 SV=1	0.927	-0.11	0.314029	96.5	104.1	71990.5	69247.3	79984.7	81657.3	77321.6	77671.9	65305	60223.9	737.1	62894.7	74035.5	74893.1
High	Master Protein	Q06706	Elongator complex protein 1 OS=Saccharomyces cerevisiae (strain ATCC 204508 / S288c) OX=559292 GN=IKI3 PE=1 SV=1	0.898	-0.15	0.474097	99.7	110.9	24224.8	24889.3	28093.3	27868.7	27706	26800	21975.1	21646.1	258.9	21465.2	26528.5	25841.2
High	Master Protein	P47047	ATP-dependent RNA helicase DOB1 OS=Saccharomyces cerevisiae (strain ATCC 204508 / S288c) OX=559292 GN=MTR4 PE=1 SV=1	1.115	0.16	0.00193958	114.8	103	32537.9	31621.6	31788.5	29274.5	28507.2	28246.6	29516.2	27501.1	292.9	22548	27295.7	27236
High	Master Protein	P29453	60S ribosomal protein L8-B OS=Saccharomyces cerevisiae (strain ATCC 204508 / S288c) OX=559292 GN=RPL8B PE=1 SV=3	0.728	-0.46	0.534882	85.5	117.5	58357.9	55512.3	92949.3	78582.1	80182.4	80778.9	52938.4	48278.7	856.5	60526	76774.7	77889
High	Master Protein	P31688	Trehalose-phosphatase OS=Saccharomyces cerevisiae (strain ATCC 204508 / S288c) OX=559292 GN=TPS2 PE=1 SV=3	1.783	0.83	0.0197252	117.4	65.8	47909.7	51322.1	31784.6	27443.1	26869.3	26337.4	43460.5	44634.5	292.9	21137.5	25727.3	25395.1
High	Master Protein	P06208	2-isopropylmalate synthase OS=Saccharomyces cerevisiae (strain ATCC 204508 / S288c) OX=559292 GN=LEU4 PE=1 SV=1	1.973	0.98	0.133351	139.6	70.7	154876	149468	73292.5	71376.1	75741.8	75790.4	140494	129992	675.4	54975.8	72522.9	73079
High	Master Protein	P33338	Protein SLA2 OS=Saccharomyces cerevisiae (strain ATCC 204508 / S288c) OX=559292 GN=SLA2 PE=1 SV=5	1.246	0.32	0.00782264	112.2	90.1	24540.2	24413.2	21442.4	19947.2	19591.7	19500	22261.2	21232	197.6	15363.9	18759.1	18802.4
High	Master Protein	P54114	Aldehyde dehydrogenase [NAD(P)+] 2 OS=Saccharomyces cerevisiae (strain ATCC 204508 / S288c) OX=559292 GN=ALD3 PE=1 SV=1	1.556	0.64	0.000573056	82.1	52.7	24235.4	26159.7	22354.6	17594.1	15570.8	14627.2	21984.7	22750.9	206	13551.5	14909	14103.9
High	Master Protein	P40989	1,3-beta-glucan synthase component GSC2 OS=Saccharomyces cerevisiae (strain ATCC 204508 / S288c) OX=559292 GN=GSC2 PE=1 SV=2	2.859	1.52	0.0115295	137.8	48.2	3330.2	3923.8	1777.9	1307.5	1164.9	1153.6	3020.9	3412.5	16.4	1007	1115.4	1112.3
High	Master Protein	P38144	ISWI chromatin-remodeling complex ATPase ISW1 OS=Saccharomyces cerevisiae (strain ATCC 204508 / S288c) OX=559292 GN=ISW1 PE=1 SV=2	1.018	0.03	0.510912	100.8	99	20116.4	20630.5	20972.1	20366	20260.3	19519.5	18248.2	17942.2	193.3	15686.5	19399.3	18821.2
High	Master Protein	Q12263	Serine/threonine-protein kinase GIN4 OS=Saccharomyces cerevisiae (strain ATCC 204508 / S288c) OX=559292 GN=GIN4 PE=1 SV=1	1.029	0.04	0.836038	102.3	99.5	18117	19318.9	21186	19137.1	18627.7	18778.5	16434.6	16801.6	195.2	14739.9	17836	18106.7
High	Master Protein	P54113	Bifunctional purine biosynthesis protein ADE16 OS=Saccharomyces cerevisiae (strain ATCC 204508 / S288c) OX=559292 GN=ADE16 PE=1 SV=1	1.027	0.04	0.809987	97	94.4	38347.6	38467.5	38232	37324.7	38867.7	36678.6	34786.4	33454.9	352.3	28748.5	37215.9	35366.4
High	Master Protein	P0CX38	40S ribosomal protein S6-B OS=Saccharomyces cerevisiae (strain ATCC 204508 / S288c) OX=559292 GN=RPS6B PE=1 SV=1	0.714	-0.49	0.00484937	86.2	120.8	196393	188044	230100	263396	280658	275217	178154	163541	2120.4	202875	268730	265371
High	Master Protein	P47037	Structural maintenance of chromosomes protein 3 OS=Saccharomyces cerevisiae (strain ATCC 204508 / S288c) OX=559292 GN=SMC3 PE=1 SV=1	1.297	0.38	9.44494e-05	114.1	88	20796.6	21089.4	19441.7	16292.7	15771.3	16032.1	18865.3	18341.3	179.2	12549.1	15101	15458.6
High	Master Protein	P32599	Fimbrin OS=Saccharomyces cerevisiae (strain ATCC 204508 / S288c) OX=559292 GN=SAC6 PE=1 SV=1	1.153	0.21	0.0253022	96.1	83.3	70264.5	69610.6	67037.3	65167.2	60359.9	59162.7	63739.3	60539.9	617.8	50193.5	57794.7	57046.2
High	Master Protein	P21954	Isocitrate dehydrogenase [NADP], mitochondrial OS=Saccharomyces cerevisiae (strain ATCC 204508 / S288c) OX=559292 GN=IDP1 PE=1 SV=1	0.593	-0.75	0.0601295	71.2	120.1	45888.3	45952.6	73170	77449.3	78927.9	77466.4	41626.8	39964.7	674.3	59653.6	75573.6	74695.1
High	Master Protein	P39954	Adenosylhomocysteinase OS=Saccharomyces cerevisiae (strain ATCC 204508 / S288c) OX=559292 GN=SAH1 PE=1 SV=1	0.98	-0.03	0.972186	94.3	96.2	196153	181472	257702	207723	198468	200091	177937	157825	2374.8	159994	190033	192933
High	Master Protein	P43616	Cys-Gly metallodipeptidase DUG1 OS=Saccharomyces cerevisiae (strain ATCC 204508 / S288c) OX=559292 GN=DUG1 PE=1 SV=1	1.2	0.26	7.52244e-05	107.1	89.2	59420.8	58894.6	57678.6	50353.6	48375.2	49092.1	53902.6	51220.2	531.5	38783.7	46319.4	47335.8
High	Master Protein	P38788	Ribosome-associated complex subunit SSZ1 OS=Saccharomyces cerevisiae (strain ATCC 204508 / S288c) OX=559292 GN=SSZ1 PE=1 SV=2	0.91	-0.14	0.0222942	93.1	102.3	98029.3	92807.3	94506.7	103880	106250	102085	88925.7	80713.9	870.9	80010.8	101735	98433.2
High	Master Protein	P10664	60S ribosomal protein L4-A OS=Saccharomyces cerevisiae (strain ATCC 204508 / S288c) OX=559292 GN=RPL4A PE=1 SV=4	0.716	-0.48	0.000131147	87.8	122.6	247062	250884	266054	334253	357291	350297	224119	218192	2451.7	257451	342107	337765
High	Master Protein	Q08965	Ribosome biogenesis protein BMS1 OS=Saccharomyces cerevisiae (strain ATCC 204508 / S288c) OX=559292 GN=BMS1 PE=1 SV=1	0.939	-0.09	0.897237	98.4	104.8	29139.2	29418.6	42659.9	30474.9	31340.7	31372.3	26433.1	25585.1	393.1	23472.6	30008.8	30249.9
High	Master Protein	P38999	Saccharopine dehydrogenase [NADP(+), L-glutamate-forming] OS=Saccharomyces cerevisiae (strain ATCC 204508 / S288c) OX=559292 GN=LYS9 PE=1 SV=1	0.986	-0.02	0.933423	101	102.4	70315.3	69635.6	78520.3	71304.4	70750.5	71447.6	63785.4	60561.6	723.6	54920.6	67743.7	68891.6
High	Master Protein	Q02725	Vacuolar transporter chaperone 3 OS=Saccharomyces cerevisiae (strain ATCC 204508 / S288c) OX=559292 GN=VTC3 PE=1 SV=1	0.482	-1.05	0.0153589	59.5	123.3	28302.5	30561.2	50498	63247.4	63378.6	65747.6	25674.1	26578.9	465.3	48714.8	60685.1	63395.5
High	Master Protein	Q06106	Multiple RNA-binding domain-containing protein 1 OS=Saccharomyces cerevisiae (strain ATCC 204508 / S288c) OX=559292 GN=MRD1 PE=1 SV=1	1.074	0.1	0.175075	102.5	95.5	22084.6	21986.5	27005.3	21178	20572.4	20067.7	20033.7	19121.5	248.9	16311.9	19698.1	19349.8
High	Master Protein	P0CX35	40S ribosomal protein S4-A OS=Saccharomyces cerevisiae (strain ATCC 204508 / S288c) OX=559292 GN=RPS4A PE=1 SV=1	0.865	-0.21	0.00212018	98.4	113.8	276518	269100	292193	318784	319788	321320	250838	234035	2692.6	245536	306197	309824
High	Master Protein	P15303	Protein transport protein SEC23 OS=Saccharomyces cerevisiae (strain ATCC 204508 / S288c) OX=559292 GN=SEC23 PE=1 SV=1	0.855	-0.23	0.00227075	85.7	100.2	40154.9	41184.1	38779.3	46971.7	47246	44763	36425.9	35817.6	357.4	36178.9	45238.1	43161.6
High	Master Protein	P32568	Protein SNQ2 OS=Saccharomyces cerevisiae (strain ATCC 204508 / S288c) OX=559292 GN=SNQ2 PE=1 SV=2	1.025	0.03	0.91919	103.3	100.8	25846	25871	25600.1	25701.6	25227.2	24346.7	23445.8	22499.9	235.9	19796.1	24155.1	23475.7
High	Master Protein	P17076	60S ribosomal protein L8-A OS=Saccharomyces cerevisiae (strain ATCC 204508 / S288c) OX=559292 GN=RPL8A PE=1 SV=4	0.77	-0.38	0.0453499	90.7	117.7	220395	224583	268208	271320	301176	291619	199928	195318	2471.6	208978	288376	281186
High	Master Protein	P15624	Phenylalanine--tRNA ligase beta subunit OS=Saccharomyces cerevisiae (strain ATCC 204508 / S288c) OX=559292 GN=FRS1 PE=1 SV=3	1.086	0.12	0.133094	101.2	93.2	95191.8	90082.2	85010.6	82976.3	86267.9	82621.7	86351.7	78343.9	783.4	63910.6	82601.7	79666
High	Master Protein	P18239	ADP,ATP carrier protein 2 OS=Saccharomyces cerevisiae (strain ATCC 204508 / S288c) OX=559292 GN=PET9 PE=1 SV=2	1.029	0.04	0.774672	97	94.3	137040	151986	130489	133187	138278	132879	124313	132181	1202.5	102584	132401	128125
High	Master Protein	P34241	Nucleolar pre-ribosomal-associated protein 1 OS=Saccharomyces cerevisiae (strain ATCC 204508 / S288c) OX=559292 GN=URB1 PE=1 SV=2	0.882	-0.18	0.950749	97.5	110.5	19537.1	19620.6	24858	22605.7	22236.4	21075.2	17722.8	17063.9	229.1	17411.6	21291.3	20321.2
High	Master Protein	P36008	Elongation factor 1-gamma 2 OS=Saccharomyces cerevisiae (strain ATCC 204508 / S288c) OX=559292 GN=TEF4 PE=1 SV=1	0.877	-0.19	0.284952	94.6	107.8	157937	143735	181170	180093	181283	173653	143270	125005	1669.5	138713	173578	167441
High	Master Protein	P49626	60S ribosomal protein L4-B OS=Saccharomyces cerevisiae (strain ATCC 204508 / S288c) OX=559292 GN=RPL4B PE=1 SV=2	0.884	-0.18	0.698764	86.2	97.5	5918	6900.2	8244.2	6946.9	9760.1	7802.4	5368.4	6001	76	5350.7	9345.4	7523.3
High	Master Protein	P06786	DNA topoisomerase 2 OS=Saccharomyces cerevisiae (strain ATCC 204508 / S288c) OX=559292 GN=TOP2 PE=1 SV=2	0.942	-0.09	0.721704	99.1	105.2	18666.9	19158.4	21263.2	20835.8	20344	20140.5	16933.4	16661.9	195.9	16048.3	19479.4	19420
High	Master Protein	P38426	Trehalose synthase complex regulatory subunit TPS3 OS=Saccharomyces cerevisiae (strain ATCC 204508 / S288c) OX=559292 GN=TPS3 PE=1 SV=3	1.244	0.31	0.00673079	102.7	82.5	24072	25829.6	29298.7	20313	21426	20767.7	21836.5	22463.8	270	15645.6	20515.5	20024.7
High	Master Protein	Q12754	Ribosomal RNA-processing protein 12 OS=Saccharomyces cerevisiae (strain ATCC 204508 / S288c) OX=559292 GN=RRP12 PE=1 SV=1	0.943	-0.08	0.983518	100.3	106.4	35876.6	36326.6	41850.1	38146.4	38522.3	38800.7	32544.8	31593	385.7	29381.4	36885.2	37412.6
High	Master Protein	P33302	Pleiotropic ABC efflux transporter of multiple drugs OS=Saccharomyces cerevisiae (strain ATCC 204508 / S288c) OX=559292 GN=PDR5 PE=1 SV=1	0.905	-0.14	0.274136	86.6	95.7	35070.6	35362.6	35789.8	39132.2	39075.4	37966.3	31813.7	30754.7	329.8	30140.7	37414.8	36608.1
High	Master Protein	P23248	40S ribosomal protein S1-B OS=Saccharomyces cerevisiae (strain ATCC 204508 / S288c) OX=559292 GN=RPS1B PE=1 SV=3	0.761	-0.39	0.00191936	91.1	119.7	210857	194911	233617	285317	277258	268808	191276	169513	2152.8	219759	265475	259192
High	Master Protein	P08964	Myosin-1 OS=Saccharomyces cerevisiae (strain ATCC 204508 / S288c) OX=559292 GN=MYO1 PE=1 SV=3	0.97	-0.04	0.985349	95.7	98.7	11687	11339.1	12929.4	12344	11930	12047.3	10601.7	9861.6	119.1	9507.7	11423	11616.3
High	Master Protein	Q08245	Protein ZEO1 OS=Saccharomyces cerevisiae (strain ATCC 204508 / S288c) OX=559292 GN=ZEO1 PE=1 SV=3	1.637	0.71	0.0676378	117.7	71.9	197638	205132	152029	120743	101460	142874	179284	178402	1401	92999.3	97148.4	137763
High	Master Protein	P33442	40S ribosomal protein S1-A OS=Saccharomyces cerevisiae (strain ATCC 204508 / S288c) OX=559292 GN=RPS1A PE=1 SV=2	0.941	-0.09	0.257574	98.5	104.6	43824.1	37425.5	45654.2	49192.8	46561	45050.4	39754.3	32548.7	420.7	37889.7	44582.3	43438.7
High	Master Protein	P41338	Acetyl-CoA acetyltransferase OS=Saccharomyces cerevisiae (strain ATCC 204508 / S288c) OX=559292 GN=ERG10 PE=1 SV=3	0.877	-0.19	0.0137542	91.2	104	54417.7	53550.6	52820.5	61042.3	62390.6	58372.4	49364.1	46572.6	486.8	47016.4	59739	56284.1
High	Master Protein	Q06408	Transaminated amino acid decarboxylase OS=Saccharomyces cerevisiae (strain ATCC 204508 / S288c) OX=559292 GN=ARO10 PE=1 SV=1	1.55	0.63	0.00578534	91	58.7	42817	38322	30512.1	25651.2	24725.3	23953.5	38840.7	33328.4	281.2	19757.3	23674.5	23096.5
High	Master Protein	P48570	Homocitrate synthase, cytosolic isozyme OS=Saccharomyces cerevisiae (strain ATCC 204508 / S288c) OX=559292 GN=LYS20 PE=1 SV=1	1.353	0.44	0.257052	105.2	77.7	19661	20617.2	13845.8	14863.8	14530.7	14443	17835.1	17930.6	127.6	11448.5	13913.2	13926.3
High	Master Protein	P29547	Elongation factor 1-gamma 1 OS=Saccharomyces cerevisiae (strain ATCC 204508 / S288c) OX=559292 GN=CAM1 PE=1 SV=2	0.733	-0.45	0.0524299	82.1	112	46430.4	44992.4	59816.9	64729.6	63370	62295.3	42118.5	39129.6	551.2	49856.5	60676.9	60066.7
High	Master Protein	P52910	Acetyl-coenzyme A synthetase 2 OS=Saccharomyces cerevisiae (strain ATCC 204508 / S288c) OX=559292 GN=ACS2 PE=1 SV=1	1.036	0.05	0.317807	105.1	101.5	118375	113323	109727	110642	109323	109433	107382	98555.9	1011.2	85219.1	104677	105518
High	Master Protein	P40457	Protein MLP2 OS=Saccharomyces cerevisiae (strain ATCC 204508 / S288c) OX=559292 GN=MLP2 PE=1 SV=1	1.151	0.2	0.0105846	110.1	95.7	12789.7	13090.7	14597.6	11574.8	11376.4	11093	11602	11384.9	134.5	8915.2	10892.9	10696.1
High	Master Protein	P49367	Homoaconitase, mitochondrial OS=Saccharomyces cerevisiae (strain ATCC 204508 / S288c) OX=559292 GN=LYS4 PE=1 SV=1	0.951	-0.07	0.99923	87.8	92.3	25034.5	25220	28611.7	26512.9	26801.2	25803.6	22709.6	21933.7	263.7	20421	25662.2	24880.5
High	Master Protein	Q08162	Exosome complex exonuclease DIS3 OS=Saccharomyces cerevisiae (strain ATCC 204508 / S288c) OX=559292 GN=DIS3 PE=1 SV=1	1.142	0.19	0.0904971	105.1	92.1	28702.7	28429.6	28348.8	27604.3	24902.3	24507.7	26037.2	24725	261.2	21261.6	23844	23631
High	Master Protein	P15625	Phenylalanine--tRNA ligase alpha subunit OS=Saccharomyces cerevisiae (strain ATCC 204508 / S288c) OX=559292 GN=FRS2 PE=1 SV=3	0.957	-0.06	0.898967	98.3	102.7	84642.4	79481.1	95114.3	88445.7	90404.9	87639.9	76781.9	69124.2	876.5	68123.3	86562.8	84504.6
High	Master Protein	P39685	Nucleoporin POM152 OS=Saccharomyces cerevisiae (strain ATCC 204508 / S288c) OX=559292 GN=POM152 PE=1 SV=1	1.137	0.18	0.334546	107.5	94.6	21521.7	21338.2	18371.5	18183.6	18774.4	19341.9	19523.1	18557.7	169.3	14005.5	17976.5	18649.9
High	Master Protein	P38891	Branched-chain-amino-acid aminotransferase, mitochondrial OS=Saccharomyces cerevisiae (strain ATCC 204508 / S288c) OX=559292 GN=BAT1 PE=1 SV=1	1.331	0.41	0.274277	117.5	88.3	114830	107417	76549.8	80679.3	83110.2	78524.6	104166	93419.9	705.4	62141.4	79578.1	75715.4
High	Master Protein	P43609	Chromatin structure-remodeling complex protein RSC8 OS=Saccharomyces cerevisiae (strain ATCC 204508 / S288c) OX=559292 GN=RSC8 PE=1 SV=1	1.028	0.04	0.371999	96.3	93.7	30960.5	31443.3	38579.9	30650.5	30596.3	30112.6	28085.3	27346	355.5	23607.9	29296	29035.3
High	Master Protein	P40482	Protein transport protein SEC24 OS=Saccharomyces cerevisiae (strain ATCC 204508 / S288c) OX=559292 GN=SEC24 PE=1 SV=1	1.064	0.09	0.693435	97.7	91.8	49404.8	50807.9	45142	46141.6	47713.4	46426	44816.8	44187.3	416	35539.5	45685.6	44765.1
High	Master Protein	P25087	Sterol 24-C-methyltransferase OS=Saccharomyces cerevisiae (strain ATCC 204508 / S288c) OX=559292 GN=ERG6 PE=1 SV=4	1.1	0.14	0.326261	100.7	91.5	80084.6	83916.8	137996	76316.5	78046.4	74567.3	72647.4	72981.9	1271.7	58781.1	74729.5	71899.6
High	Master Protein	P49723	Ribonucleoside-diphosphate reductase small chain 2 OS=Saccharomyces cerevisiae (strain ATCC 204508 / S288c) OX=559292 GN=RNR4 PE=1 SV=1	0.729	-0.46	0.0222242	88.5	121.5	100892	102052	129745	140044	140081	143027	91522.5	88754.1	1195.6	107866	134128	137910
High	Master Protein	P43535	Protein GCN20 OS=Saccharomyces cerevisiae (strain ATCC 204508 / S288c) OX=559292 GN=GCN20 PE=1 SV=1	1.089	0.12	0.301055	105.8	97.1	40534.5	39300.9	36060	37221.6	36099.1	34316.7	36770.2	34179.7	332.3	28669.1	34565	33089.1
High	Master Protein	P30822	Exportin-1 OS=Saccharomyces cerevisiae (strain ATCC 204508 / S288c) OX=559292 GN=CRM1 PE=1 SV=1	0.984	-0.02	0.989856	97.9	99.5	39358.7	40920.6	39553.8	40888.2	40204.3	37648.5	35703.6	35588.4	364.5	31493.2	38495.7	36301.6
High	Master Protein	P38791	Deoxyhypusine synthase OS=Saccharomyces cerevisiae (strain ATCC 204508 / S288c) OX=559292 GN=DYS1 PE=1 SV=1	0.982	-0.03	0.758859	104.6	106.5	54971.7	55711.3	57773.2	60468.9	56729.8	56394.4	49866.6	48451.7	532.4	46574.8	54318.9	54376.9
High	Master Protein	P43123	UDP-N-acetylglucosamine pyrophosphorylase OS=Saccharomyces cerevisiae (strain ATCC 204508 / S288c) OX=559292 GN=QRI1 PE=1 SV=1	1.105	0.14	0.0658287	98.9	89.5	32604.7	32888.5	40083	30279.8	29770.1	28890.5	29576.8	28602.9	369.4	23322.3	28504.9	27856.9
High	Master Protein	P53131	Pre-mRNA-splicing factor ATP-dependent RNA helicase PRP43 OS=Saccharomyces cerevisiae (strain ATCC 204508 / S288c) OX=559292 GN=PRP43 PE=1 SV=1	0.981	-0.03	0.632773	96.7	98.6	34440.5	33588.9	32447.5	37441.3	34231.6	33577.5	31242.1	29212	299	28838.3	32776.8	32376.2
High	Master Protein	P33322	H/ACA ribonucleoprotein complex subunit CBF5 OS=Saccharomyces cerevisiae (strain ATCC 204508 / S288c) OX=559292 GN=CBF5 PE=1 SV=1	0.906	-0.14	0.787828	90.6	100	54905.2	51561.9	67234.7	61908.2	60425.5	60621.5	49806.3	44843	619.6	47683.4	57857.5	58452.7
High	Master Protein	P47169	Sulfite reductase [NADPH] subunit beta OS=Saccharomyces cerevisiae (strain ATCC 204508 / S288c) OX=559292 GN=MET5 PE=1 SV=1	0.546	-0.87	3.34938e-05	89.1	163	15501.1	15102.4	13626.8	27223.9	28714.2	27638.4	14061.5	13134.5	125.6	20968.6	27493.9	26649.7
High	Master Protein	P15646	rRNA 2'-O-methyltransferase fibrillarin OS=Saccharomyces cerevisiae (strain ATCC 204508 / S288c) OX=559292 GN=NOP1 PE=1 SV=1	0.912	-0.13	0.996437	85.4	93.7	106030	102677	143283	124572	116252	113759	96183	89297.8	1320.4	95948.8	111312	109689
High	Master Protein	P19358	S-adenosylmethionine synthase 2 OS=Saccharomyces cerevisiae (strain ATCC 204508 / S288c) OX=559292 GN=SAM2 PE=1 SV=3	0.922	-0.12	0.288979	95.4	103.4	140809	126912	129294	137163	140206	141077	127733	110374	1191.5	105647	134247	136030
High	Master Protein	P39109	Metal resistance protein YCF1 OS=Saccharomyces cerevisiae (strain ATCC 204508 / S288c) OX=559292 GN=YCF1 PE=1 SV=2	0.943	-0.08	0.0182802	96.9	102.8	29963	30601.7	29703.4	31768.2	32390.2	31529.2	27180.5	26614.1	273.7	24468.7	31013.7	30401.3
High	Master Protein	P33297	26S proteasome regulatory subunit 6A OS=Saccharomyces cerevisiae (strain ATCC 204508 / S288c) OX=559292 GN=RPT5 PE=1 SV=3	1.12	0.16	0.0196098	97.4	87	38813.2	39548.2	38728.2	36362.2	34664.9	33934.7	35208.8	34394.8	356.9	28007.2	33191.7	32720.7
High	Master Protein	P32861	UTP--glucose-1-phosphate uridylyltransferase OS=Saccharomyces cerevisiae (strain ATCC 204508 / S288c) OX=559292 GN=UGP1 PE=1 SV=1	1.408	0.49	0.00985701	112.8	80.1	77007.9	78426.6	61904.1	54614.6	55616.4	54674.2	69856.4	68207.1	570.5	42065.7	53252.8	52718.2
High	Master Protein	P38181	Nucleoporin NUP170 OS=Saccharomyces cerevisiae (strain ATCC 204508 / S288c) OX=559292 GN=NUP170 PE=1 SV=1	1.004	0.01	0.798702	102.8	102.3	11241.9	11789.1	14729.1	11655.5	11939.9	11736.7	10197.9	10252.9	135.7	8977.4	11432.5	11316.8
High	Master Protein	P25375	Saccharolysin OS=Saccharomyces cerevisiae (strain ATCC 204508 / S288c) OX=559292 GN=PRD1 PE=1 SV=1	1.423	0.51	0.000123677	135.6	95.3	45325.4	49143.3	41703.4	31859.2	31067.7	31912.9	41116.2	42739.6	384.3	24538.8	29747.4	30771.2
High	Master Protein	P40413	T-complex protein 1 subunit epsilon OS=Saccharomyces cerevisiae (strain ATCC 204508 / S288c) OX=559292 GN=CCT5 PE=1 SV=3	0.856	-0.22	0.0449552	89.8	104.9	54181.4	52084	60874.8	63899.4	63321.3	62143.1	49149.7	45297.1	561	49217.1	60630.3	59919.9
High	Master Protein	P38427	Trehalose synthase complex regulatory subunit TSL1 OS=Saccharomyces cerevisiae (strain ATCC 204508 / S288c) OX=559292 GN=TSL1 PE=1 SV=1	2.11	1.08	0.0103887	116.3	55.1	32526.4	34360.3	19947.5	15660.5	15130.6	15417.5	29505.8	29883	183.8	12062.2	14487.6	14866
High	Master Protein	P32790	Actin cytoskeleton-regulatory complex protein SLA1 OS=Saccharomyces cerevisiae (strain ATCC 204508 / S288c) OX=559292 GN=SLA1 PE=1 SV=1	1.314	0.39	0.0412031	106.2	80.8	24993.4	24647	19763.6	18962.4	18674.9	18755.3	22672.4	21435.3	182.1	14605.3	17881.3	18084.3
High	Master Protein	P33734	Imidazole glycerol phosphate synthase hisHF OS=Saccharomyces cerevisiae (strain ATCC 204508 / S288c) OX=559292 GN=HIS7 PE=1 SV=2	1.222	0.29	0.00180708	113.5	92.9	39877.9	40502.4	43988.4	33137	33658.6	31812.6	36174.6	35224.7	405.4	25523	32228.2	30674.5
High	Master Protein	P00927	Threonine dehydratase, mitochondrial OS=Saccharomyces cerevisiae (strain ATCC 204508 / S288c) OX=559292 GN=ILV1 PE=1 SV=2	1.029	0.04	0.290355	104.8	101.8	42924	42837.3	45141.7	43108.3	41695.3	40809	38937.8	37255.3	416	33203.2	39923.3	39349.1
High	Master Protein	Q04439	Myosin-5 OS=Saccharomyces cerevisiae (strain ATCC 204508 / S288c) OX=559292 GN=MYO5 PE=1 SV=1	1.197	0.26	0.053971	105.9	88.5	26457.1	26461.1	24150.6	24026.6	21981.5	22109.8	24000.2	23013	222.6	18506	21047.3	21318.8
High	Master Protein	P35207	Antiviral helicase SKI2 OS=Saccharomyces cerevisiae (strain ATCC 204508 / S288c) OX=559292 GN=SKI2 PE=1 SV=2	1.227	0.3	0.000377995	112.1	91.3	19779.7	20897.5	18809.9	16119.2	16137.6	15929.6	17942.8	18174.5	173.3	12415.5	15451.8	15359.7
High	Master Protein	P46672	tRNA-aminoacylation cofactor ARC1 OS=Saccharomyces cerevisiae (strain ATCC 204508 / S288c) OX=559292 GN=ARC1 PE=1 SV=2	1.315	0.4	0.0807214	114.2	86.8	114987	108102	84581.2	83383.8	81567.8	82193.1	104308	94015.9	779.4	64224.5	78101.3	79252.7
High	Master Protein	P38845	Cruciform DNA-recognizing protein 1 OS=Saccharomyces cerevisiae (strain ATCC 204508 / S288c) OX=559292 GN=CRP1 PE=1 SV=1	1.213	0.28	0.00745502	104.6	86.2	39113.4	36893	43280.5	33702.6	32136.6	32235.5	35481.1	32085.6	398.8	25958.7	30770.8	31082.2
High	Master Protein	Q01217	Protein ARG5,6, mitochondrial OS=Saccharomyces cerevisiae (strain ATCC 204508 / S288c) OX=559292 GN=ARG5,6 PE=1 SV=1	1.703	0.77	0.0519589	131.5	77.2	34206.2	35308.2	21895.4	20663.8	20090.8	19833.9	31029.6	30707.3	201.8	15915.8	19237	19124.3
High	Master Protein	P29311	Protein BMH1 OS=Saccharomyces cerevisiae (strain ATCC 204508 / S288c) OX=559292 GN=BMH1 PE=1 SV=4	1.1	0.14	0.999941	113.1	102.9	211672	227080	162790	186277	192474	215348	192014	197490	1500.1	143476	184294	207644
High	Master Protein	P18759	Vesicular-fusion protein SEC18 OS=Saccharomyces cerevisiae (strain ATCC 204508 / S288c) OX=559292 GN=SEC18 PE=1 SV=2	1.105	0.14	0.0403155	102.1	92.4	35657.3	37246.5	37841.8	33720.4	34926.3	32605.4	32345.9	32393	348.7	25972.4	33442	31438.9
High	Master Protein	P38011	Guanine nucleotide-binding protein subunit beta-like protein OS=Saccharomyces cerevisiae (strain ATCC 204508 / S288c) OX=559292 GN=ASC1 PE=1 SV=4	0.602	-0.73	0.0242656	76.9	127.8	162360	157329	231132	271029	269864	249733	147282	136828	2129.9	208754	258395	240799
High	Master Protein	P40217	Eukaryotic translation initiation factor 3 subunit I OS=Saccharomyces cerevisiae (strain ATCC 204508 / S288c) OX=559292 GN=TIF34 PE=1 SV=1	0.941	-0.09	0.971144	92	97.7	53672.5	53250.4	61792.7	58766.1	57014.8	55929.6	48688.1	46311.6	569.4	45263.3	54591.7	53928.7
High	Master Protein	P39533	Homocitrate dehydratase, mitochondrial OS=Saccharomyces cerevisiae (strain ATCC 204508 / S288c) OX=559292 GN=ACO2 PE=1 SV=1	1.012	0.02	0.540516	80.5	79.6	40874.1	35536.1	34616.3	35282.6	35117	33666.5	37078.3	30905.5	319	27175.6	33624.6	32462.1
High	Master Protein	Q07551	NADPH-dependent alpha-keto amide reductase OS=Saccharomyces cerevisiae (strain ATCC 204508 / S288c) OX=559292 GN=YDL124W PE=1 SV=1	1.831	0.87	0.000207046	109.2	59.6	69361.4	76868.1	58364.4	37491.6	40156.1	37885	62920	66851.7	537.8	28877	38449.5	36529.6
High	Master Protein	P38811	Transcription-associated protein 1 OS=Saccharomyces cerevisiae (strain ATCC 204508 / S288c) OX=559292 GN=TRA1 PE=1 SV=1	0.886	-0.17	0.410971	96.9	109.3	9409.3	9677.7	11258.2	11236.2	10920.8	10919.3	8535.5	8416.6	103.7	8654.5	10456.7	10528.6
High	Master Protein	P41811	Coatomer subunit beta' OS=Saccharomyces cerevisiae (strain ATCC 204508 / S288c) OX=559292 GN=SEC27 PE=1 SV=1	1.042	0.06	0.998843	101.3	97.2	66611.5	64948.3	55080.3	62300.5	62342.8	62724.4	60425.5	56485.1	507.6	47985.5	59693.4	60480.4
High	Master Protein	P32527	Zuotin OS=Saccharomyces cerevisiae (strain ATCC 204508 / S288c) OX=559292 GN=ZUO1 PE=1 SV=1	0.978	-0.03	0.978883	97.6	99.8	77450.3	67829	70764.3	73667	72380.7	72338.6	70257.7	58990.5	652.1	56740.4	69304.6	69750.7
High	Master Protein	Q06010	A-factor-processing enzyme OS=Saccharomyces cerevisiae (strain ATCC 204508 / S288c) OX=559292 GN=STE23 PE=1 SV=2	0.988	-0.02	0.952328	90.6	91.8	18500	18669.8	23747.3	18901.5	18775.4	20779.8	16782	16237	218.8	14558.5	17977.5	20036.4
High	Master Protein	P27476	Nuclear localization sequence-binding protein OS=Saccharomyces cerevisiae (strain ATCC 204508 / S288c) OX=559292 GN=NSR1 PE=1 SV=1	0.852	-0.23	0.735996	99.6	116.8	69803.3	68084.4	93381.2	86193.1	80965.8	81883.7	63320.9	59212.5	860.5	66388.3	77524.8	78954.3
High	Master Protein	P42943	T-complex protein 1 subunit eta OS=Saccharomyces cerevisiae (strain ATCC 204508 / S288c) OX=559292 GN=CCT7 PE=1 SV=1	0.957	-0.06	0.0520334	95	99.2	46471.6	46425.7	43455.7	48504.8	49469	47712.7	42155.9	40376.2	400.5	37359.8	47366.6	46005.7
High	Master Protein	Q12122	Homocitrate synthase, mitochondrial OS=Saccharomyces cerevisiae (strain ATCC 204508 / S288c) OX=559292 GN=LYS21 PE=1 SV=1	1.302	0.38	1.44846e-05	109.3	84	91745.3	89479.1	89481.8	68750.8	69341.3	68751.7	83225.2	77819.4	824.6	52953.8	66394.4	66292.1
High	Master Protein	P53235	Eukaryotic translation initiation factor 2A OS=Saccharomyces cerevisiae (strain ATCC 204508 / S288c) OX=559292 GN=YGR054W PE=1 SV=1	0.927	-0.11	0.936359	97.6	105.2	46327.6	42572.5	56290	50185.7	49958.4	49405.5	42025.3	37025.1	518.7	38654.4	47835.2	47638
High	Master Protein	P48582	Vacuolar-sorting protein BRO1 OS=Saccharomyces cerevisiae (strain ATCC 204508 / S288c) OX=559292 GN=BRO1 PE=1 SV=2	1.192	0.25	0.0289423	104	87.3	20620.8	21455.2	18392.1	17299.4	17927	17003.4	18705.8	18659.4	169.5	13324.5	17165.1	16395.1
High	Master Protein	P38697	Inosine-5'-monophosphate dehydrogenase 2 OS=Saccharomyces cerevisiae (strain ATCC 204508 / S288c) OX=559292 GN=IMD2 PE=1 SV=1	0.551	-0.86	0.00107841	81	146.9	11079.6	11869	15130.5	22327.9	21521.9	21027.5	10050.7	10322.4	139.4	17197.6	20607.3	20275.2
High	Master Protein	P47054	Nucleoporin NUP192 OS=Saccharomyces cerevisiae (strain ATCC 204508 / S288c) OX=559292 GN=NUP192 PE=1 SV=1	0.909	-0.14	0.999772	96.3	105.9	10057.6	10481.8	13990.2	11751.8	11528.7	11121.6	9123.5	9115.9	128.9	9051.6	11038.8	10723.7
High	Master Protein	P39940	E3 ubiquitin-protein ligase RSP5 OS=Saccharomyces cerevisiae (strain ATCC 204508 / S288c) OX=559292 GN=RSP5 PE=1 SV=1	1.178	0.24	0.0285131	105.9	89.9	30737.6	31061.1	27535.9	26958.9	26000.6	26094.8	27883.1	27013.6	253.7	20764.5	24895.6	25161.3
High	Master Protein	P12683	3-hydroxy-3-methylglutaryl-coenzyme A reductase 1 OS=Saccharomyces cerevisiae (strain ATCC 204508 / S288c) OX=559292 GN=HMG1 PE=1 SV=1	1.113	0.15	0.443098	109.8	98.7	34304.4	29962.2	40156.5	31558.1	30819.1	30362.9	31118.7	26057.9	370	24306.9	29509.3	29276.7
High	Master Protein	Q08647	Multisubstrate pseudouridine synthase 7 OS=Saccharomyces cerevisiae (strain ATCC 204508 / S288c) OX=559292 GN=PUS7 PE=1 SV=1	1.124	0.17	0.0315885	110.4	98.2	23281.8	24142.3	22145.9	21636.9	20254.1	20717.9	21119.7	20996.4	204.1	16665.4	19393.3	19976.7
High	Master Protein	P43593	Ubiquitin carboxyl-terminal hydrolase 6 OS=Saccharomyces cerevisiae (strain ATCC 204508 / S288c) OX=559292 GN=UBP6 PE=1 SV=1	1.166	0.22	0.0400266	104	89.2	29378.8	30921.6	37689.6	26617.9	26520.2	25207.2	26650.4	26892.3	347.3	20501.8	25393.1	24305.4
High	Master Protein	P38840	Aromatic amino acid aminotransferase 2 OS=Saccharomyces cerevisiae (strain ATCC 204508 / S288c) OX=559292 GN=ARO9 PE=1 SV=3	1.77	0.82	0.122777	94.5	53.4	83772.7	73499.7	42296.4	41524.1	43288.7	41322.1	75993	63922.2	389.8	31983	41449	39843.8
High	Master Protein	P32563	V-type proton ATPase subunit a, vacuolar isoform OS=Saccharomyces cerevisiae (strain ATCC 204508 / S288c) OX=559292 GN=VPH1 PE=1 SV=3	1.08	0.11	0.477891	103.7	96	49643.2	45006.6	51352.3	45985.2	47168.1	44461.2	45033	39142	473.2	35419.1	45163.5	42870.6
High	Master Protein	P31116	Homoserine dehydrogenase OS=Saccharomyces cerevisiae (strain ATCC 204508 / S288c) OX=559292 GN=HOM6 PE=1 SV=1	0.847	-0.24	0.00154531	94.9	112	91179.5	82806.6	87274.4	107550	102981	101544	82711.9	72016.4	804.3	82838.1	98604.5	97910.9
High	Master Protein	P32639	Pre-mRNA-splicing helicase BRR2 OS=Saccharomyces cerevisiae (strain ATCC 204508 / S288c) OX=559292 GN=BRR2 PE=1 SV=2	1.293	0.37	0.00155408	117.8	91.1	11286.3	11660.3	10416	9084.6	8729.5	8529.1	10238.2	10140.9	96	6997.2	8358.5	8224
High	Master Protein	Q04660	Ribosome biogenesis protein ERB1 OS=Saccharomyces cerevisiae (strain ATCC 204508 / S288c) OX=559292 GN=ERB1 PE=1 SV=1	0.966	-0.05	0.997137	98.5	101.9	31576.9	30765.4	37415.6	33718.8	32671.7	32019	28644.5	26756.5	344.8	25971.1	31283.2	30873.5
High	Master Protein	P40053	Altered inheritance of mitochondria protein 9, mitochondrial OS=Saccharomyces cerevisiae (strain ATCC 204508 / S288c) OX=559292 GN=AIM9 PE=1 SV=1	0.995	-0.01	0.993719	92.8	93.2	29453.8	30300.9	31632.4	30806.6	30445.1	29678.2	26718.6	26352.5	291.5	23728.1	29151.3	28616.4
High	Master Protein	Q02785	ATP-dependent permease PDR12 OS=Saccharomyces cerevisiae (strain ATCC 204508 / S288c) OX=559292 GN=PDR12 PE=1 SV=1	1.273	0.35	0.0385584	97.4	76.5	27841.3	23250.5	30044.1	22097.9	21862.7	20871	25255.8	20220.8	276.9	17020.4	20933.6	20124.4
High	Master Protein	P32614	Fumarate reductase 1 OS=Saccharomyces cerevisiae (strain ATCC 204508 / S288c) OX=559292 GN=FRD1 PE=1 SV=1	1.126	0.17	0.000160125	90.9	80.7	45993.8	45485.9	47286.9	41498.4	40863.5	40859.5	41722.5	39558.8	435.8	31963.2	39126.8	39397.8
High	Master Protein	P17536	Tropomyosin-1 OS=Saccharomyces cerevisiae (strain ATCC 204508 / S288c) OX=559292 GN=TPM1 PE=1 SV=1	1.611	0.69	0.0062028	108.3	67.2	51789.2	59956.6	59545.4	36952.8	32683.3	39683.7	46979.7	52143.8	548.7	28462.1	31294.3	38264
High	Master Protein	Q00416	Helicase SEN1 OS=Saccharomyces cerevisiae (strain ATCC 204508 / S288c) OX=559292 GN=SEN1 PE=1 SV=2	1.015	0.02	0.655101	105.2	103.6	9492.6	10032.9	14768.6	9932.7	9881.3	9819.2	8611.1	8725.6	136.1	7650.4	9461.4	9467.9
High	Master Protein	Q12389	ATP-dependent RNA helicase DBP10 OS=Saccharomyces cerevisiae (strain ATCC 204508 / S288c) OX=559292 GN=DBP10 PE=1 SV=2	0.898	-0.16	0.505206	92.2	102.7	24479	24239.1	28777.5	27872.6	27265.3	27114.1	22205.7	21080.6	265.2	21468.2	26106.6	26144.1
High	Master Protein	Q12499	Nucleolar protein 58 OS=Saccharomyces cerevisiae (strain ATCC 204508 / S288c) OX=559292 GN=NOP58 PE=1 SV=1	0.895	-0.16	0.00023842	93.5	104.4	71635.5	69660.5	72552.6	80006.3	78145.5	80991.5	64983	60583.3	668.6	61623	74824.4	78094
High	Master Protein	P54838	Dihydroxyacetone kinase 1 OS=Saccharomyces cerevisiae (strain ATCC 204508 / S288c) OX=559292 GN=DAK1 PE=1 SV=1	1.14	0.19	0.00019758	103.9	91.2	52520.8	53005	50259.2	45954	46088.3	46278.3	47643.4	46098.1	463.1	35395	44129.6	44622.7
High	Master Protein	P20447	ATP-dependent RNA helicase DBP3 OS=Saccharomyces cerevisiae (strain ATCC 204508 / S288c) OX=559292 GN=DBP3 PE=1 SV=2	0.946	-0.08	0.988225	94.1	99.5	38755.2	37958.3	51140.9	43055.1	40979	39609.5	35156.1	33012.1	471.3	33162.2	39237.4	38192.5
High	Master Protein	Q12496	Uncharacterized protein YOL098C OS=Saccharomyces cerevisiae (strain ATCC 204508 / S288c) OX=559292 GN=YOL098C PE=1 SV=1	1.085	0.12	0.0470562	108.5	100	33950.6	34612.4	32155.3	31279.7	31408.7	30677.4	30797.7	30102.2	296.3	24092.5	30073.9	29579.9
High	Master Protein	Q01477	Ubiquitin carboxyl-terminal hydrolase 3 OS=Saccharomyces cerevisiae (strain ATCC 204508 / S288c) OX=559292 GN=UBP3 PE=1 SV=1	0.942	-0.09	0.953866	97.2	103.2	19194.9	19736.3	22595	21325.1	20957.1	20404.5	17412.3	17164.6	208.2	16425.2	20066.5	19674.5
High	Master Protein	P11745	Ran GTPase-activating protein 1 OS=Saccharomyces cerevisiae (strain ATCC 204508 / S288c) OX=559292 GN=RNA1 PE=1 SV=2	1.124	0.17	0.596539	112.9	100.4	65651	65908.5	54692.4	56671	58398.4	58881	59554.2	57320.2	504	43649.6	55916.5	56774.5
High	Master Protein	P20449	ATP-dependent RNA helicase DBP5 OS=Saccharomyces cerevisiae (strain ATCC 204508 / S288c) OX=559292 GN=DBP5 PE=1 SV=2	1.167	0.22	0.000392504	107	91.7	42622.8	42966.8	40624.9	35312.6	36523.7	36541.3	38664.6	37368	374.4	27198.7	34971.5	35234
High	Master Protein	P17709	Glucokinase-1 OS=Saccharomyces cerevisiae (strain ATCC 204508 / S288c) OX=559292 GN=GLK1 PE=1 SV=1	3.581	1.84	0.000831611	151.4	42.3	88191.6	94663.9	49582.8	25088	24146.8	24626	80001.6	82328.6	456.9	19323.5	23120.6	23745
High	Master Protein	P25491	Mitochondrial protein import protein MAS5 OS=Saccharomyces cerevisiae (strain ATCC 204508 / S288c) OX=559292 GN=YDJ1 PE=1 SV=1	1.201	0.26	0.232678	111.7	93	87182.3	85454.3	69568.7	73163.2	71155.4	68305.2	79086	74319.1	641.1	56352.3	68131.4	65861.6
High	Master Protein	P05750	40S ribosomal protein S3 OS=Saccharomyces cerevisiae (strain ATCC 204508 / S288c) OX=559292 GN=RPS3 PE=1 SV=5	0.742	-0.43	0.000337198	90.2	121.6	265163	269133	233899	357462	360785	344508	240538	234063	2155.4	275327	345452	332183
High	Master Protein	Q04217	Probable ATP-dependent RNA helicase DHR1 OS=Saccharomyces cerevisiae (strain ATCC 204508 / S288c) OX=559292 GN=ECM16 PE=1 SV=1	0.999	0	0.783701	100.5	100.6	15070.4	15347.7	17153.5	15651.8	15355.4	14777.4	13670.9	13347.8	158.1	12055.4	14702.8	14248.8
High	Master Protein	P42842	Essential for maintenance of the cell wall protein 1 OS=Saccharomyces cerevisiae (strain ATCC 204508 / S288c) OX=559292 GN=EMW1 PE=1 SV=1	0.804	-0.31	0.932877	85.3	106	24997.3	25425.9	41059.7	32995.7	31275.7	31606.1	22675.9	22112.8	378.4	25414.2	29946.6	30475.4
High	Master Protein	P16387	Pyruvate dehydrogenase E1 component subunit alpha, mitochondrial OS=Saccharomyces cerevisiae (strain ATCC 204508 / S288c) OX=559292 GN=PDA1 PE=1 SV=2	0.922	-0.12	0.0130379	92.3	100	70980.2	70716.5	70310.8	76681.3	77209.1	75160.2	64388.5	61501.6	647.9	59062	73927.9	72471.4
High	Master Protein	P32908	Structural maintenance of chromosomes protein 1 OS=Saccharomyces cerevisiae (strain ATCC 204508 / S288c) OX=559292 GN=SMC1 PE=1 SV=1	1.197	0.26	0.0558157	109.4	91.4	13677.2	13922.2	19152.4	12061	11528.2	11631.3	12407	12108	176.5	9289.7	11038.2	11215.1
High	Master Protein	Q12166	2-isopropylmalate synthase 2, mitochondrial OS=Saccharomyces cerevisiae (strain ATCC 204508 / S288c) OX=559292 GN=LEU9 PE=1 SV=1	1.195	0.26	0.211227	114.8	96	17523.6	16565.7	13460.8	13887.2	13861.4	13528.4	15896.2	14407.1	124	10696.3	13272.3	13044.4
High	Master Protein	P53920	Pro-apoptotic serine protease NMA111 OS=Saccharomyces cerevisiae (strain ATCC 204508 / S288c) OX=559292 GN=NMA111 PE=1 SV=1	1.083	0.12	0.173283	101.9	94	23752.6	24854.3	29693.6	22939.6	23207.5	21812.8	21546.8	21615.6	273.6	17668.7	22221.2	21032.5
High	Master Protein	P28777	Chorismate synthase OS=Saccharomyces cerevisiae (strain ATCC 204508 / S288c) OX=559292 GN=ARO2 PE=1 SV=1	1.038	0.05	0.0860632	104.2	100.4	40442.6	39659.1	40275.8	38785.7	38885.2	38259.6	36686.8	34491.3	371.1	29873.8	37232.6	36890.9
High	Master Protein	P32368	Phosphatidylinositol-3-phosphatase SAC1 OS=Saccharomyces cerevisiae (strain ATCC 204508 / S288c) OX=559292 GN=SAC1 PE=1 SV=1	0.994	-0.01	0.984814	94.4	94.9	30564.5	30532.6	29770.7	30720.3	31208.5	29762.4	27726.1	26554	274.3	23661.6	29882.2	28697.6
High	Master Protein	Q06440	Coronin-like protein OS=Saccharomyces cerevisiae (strain ATCC 204508 / S288c) OX=559292 GN=CRN1 PE=1 SV=1	1.053	0.07	0.00767363	105.6	100.3	33166.8	32917.9	34602	31493	31387.4	31873.7	30086.7	28628.5	318.9	24256.7	30053.4	30733.4
High	Master Protein	P32795	Mitochondrial inner membrane i-AAA protease supercomplex subunit YME1 OS=Saccharomyces cerevisiae (strain ATCC 204508 / S288c) OX=559292 GN=YME1 PE=1 SV=1	1.312	0.39	0.0162427	117.6	89.6	14150.8	15354.2	19172.9	12229.8	11704	11044.6	12836.7	13353.4	176.7	9419.7	11206.6	10649.5
High	Master Protein	P40047	Aldehyde dehydrogenase 5, mitochondrial OS=Saccharomyces cerevisiae (strain ATCC 204508 / S288c) OX=559292 GN=ALD5 PE=1 SV=4	1.611	0.69	0.182895	129.7	80.5	79474.1	77964.4	46252.5	48409.1	48481.5	47894.1	72093.6	67805.1	426.2	37286	46421.1	46180.7
High	Master Protein	Q03558	NADPH dehydrogenase 2 OS=Saccharomyces cerevisiae (strain ATCC 204508 / S288c) OX=559292 GN=OYE2 PE=1 SV=3	0.683	-0.55	0.00480202	77.8	114	62809.4	62486	78488.9	91036.2	92011.4	94513.8	56976.5	54343.7	723.3	70118.6	88101	91132.6
High	Master Protein	Q06698	Putative ATP-dependent RNA helicase YLR419W OS=Saccharomyces cerevisiae (strain ATCC 204508 / S288c) OX=559292 GN=YLR419W PE=1 SV=1	0.988	-0.02	0.999886	99	100.2	12697.8	13283	12349.9	12852.4	12926.5	12590.5	11518.6	11552.2	113.8	9899.2	12377.1	12140.1
High	Master Protein	P32590	Heat shock protein homolog SSE2 OS=Saccharomyces cerevisiae (strain ATCC 204508 / S288c) OX=559292 GN=SSE2 PE=1 SV=3	1.473	0.56	0.0798219	101.2	68.7	12950.9	14711.4	9296.1	9177.6	8791.6	8548.5	11748.2	12794.4	85.7	7068.8	8417.9	8242.7
High	Master Protein	P40064	Nucleoporin NUP157 OS=Saccharomyces cerevisiae (strain ATCC 204508 / S288c) OX=559292 GN=NUP157 PE=1 SV=1	1.172	0.23	0.00162124	108.8	92.8	19102.6	19485.4	18234.8	16554.6	15893.1	16292.4	17328.6	16946.3	168	12750.8	15217.7	15709.6
High	Master Protein	P22336	Replication factor A protein 1 OS=Saccharomyces cerevisiae (strain ATCC 204508 / S288c) OX=559292 GN=RFA1 PE=1 SV=1	1.042	0.06	0.371446	86.9	83.4	32807	30847.8	31898.1	30614.5	31351.6	29714.7	29760.4	26828.2	293.9	23580.1	30019.2	28651.6
High	Master Protein	P33330	Phosphoserine aminotransferase OS=Saccharomyces cerevisiae (strain ATCC 204508 / S288c) OX=559292 GN=SER1 PE=1 SV=1	1.373	0.46	0.549128	118.7	86.5	39989.6	38015.9	24090.1	29258.5	27698.1	26967.4	36275.9	33062.2	222	22535.7	26521	26002.7
High	Master Protein	P17883	Superkiller protein 3 OS=Saccharomyces cerevisiae (strain ATCC 204508 / S288c) OX=559292 GN=SKI3 PE=1 SV=2	0.964	-0.05	0.819776	96.7	100.3	13117.7	13140	13671.4	14414	13631	13165.4	11899.5	11427.7	126	11102.1	13051.7	12694.4
High	Master Protein	P34730	Protein BMH2 OS=Saccharomyces cerevisiae (strain ATCC 204508 / S288c) OX=559292 GN=BMH2 PE=1 SV=3	0.881	-0.18	0.378539	101.4	115	19642.9	20505.7	11542.9	22288.3	19656.4	22459.8	17818.7	17833.7	106.4	17167.1	18821	21656.3
High	Master Protein	P47075	Vacuolar transporter chaperone 4 OS=Saccharomyces cerevisiae (strain ATCC 204508 / S288c) OX=559292 GN=VTC4 PE=1 SV=2	0.524	-0.93	0.0244336	61.5	117.5	31528.3	32954	53094.1	62818.2	63970.7	62938.6	28600.4	28659.8	489.3	48384.3	61252	60687
High	Master Protein	P13663	Aspartate-semialdehyde dehydrogenase OS=Saccharomyces cerevisiae (strain ATCC 204508 / S288c) OX=559292 GN=HOM2 PE=1 SV=1	1.3	0.38	0.0390578	123.2	94.7	100839	92574.6	76689.8	68086.5	73813.2	71195.9	91474.7	80511.5	706.7	52442.1	70676.2	68648.8
High	Master Protein	P16603	NADPH--cytochrome P450 reductase OS=Saccharomyces cerevisiae (strain ATCC 204508 / S288c) OX=559292 GN=NCP1 PE=1 SV=3	0.686	-0.54	0.163254	80.8	117.7	21267.1	20384.7	31628.4	32347.1	30992.9	29841.3	19292.1	17728.4	291.5	24914.6	29675.7	28773.7
High	Master Protein	P89105	RNA polymerase-associated protein CTR9 OS=Saccharomyces cerevisiae (strain ATCC 204508 / S288c) OX=559292 GN=CTR9 PE=1 SV=3	0.955	-0.07	0.89933	95.1	99.6	29466.5	29695.7	32044.6	31264.7	31092.3	30336.3	26730	25826.2	295.3	24081	29770.9	29251
High	Master Protein	Q06053	tRNA-dihydrouridine(47) synthase [NAD(P)(+)] OS=Saccharomyces cerevisiae (strain ATCC 204508 / S288c) OX=559292 GN=DUS3 PE=1 SV=2	1.23	0.3	0.00091309	114.1	92.8	18427.4	18363.2	20605.2	15421.6	14970.7	14986.8	16716.1	15970.4	189.9	11878.2	14334.5	14450.6
High	Master Protein	Q03862	Probable metalloprotease ARX1 OS=Saccharomyces cerevisiae (strain ATCC 204508 / S288c) OX=559292 GN=ARX1 PE=1 SV=1	1.08	0.11	0.448564	99.5	92.1	35370.5	34625.2	31962.2	31908.5	33161.2	32061.7	32085.7	30113.4	294.5	24576.8	31751.9	30914.7
High	Master Protein	P20459	Eukaryotic translation initiation factor 2 subunit alpha OS=Saccharomyces cerevisiae (strain ATCC 204508 / S288c) OX=559292 GN=SUI2 PE=1 SV=1	0.889	-0.17	0.0089901	100.8	113.4	88877.2	91202.5	80591	100008	99396.9	106894	80623.5	79318.2	742.7	77029.1	95172.7	103070
High	Master Protein	P07170	Adenylate kinase OS=Saccharomyces cerevisiae (strain ATCC 204508 / S288c) OX=559292 GN=ADK1 PE=1 SV=2	0.824	-0.28	0.124679	95.2	115.6	96576.9	93115.5	113962	110849	119210	117262	87608.1	80982	1050.2	85378.7	114144	113066
High	Master Protein	P53550	m7GpppN-mRNA hydrolase OS=Saccharomyces cerevisiae (strain ATCC 204508 / S288c) OX=559292 GN=DCP2 PE=1 SV=1	2.024	1.02	0.0695455	167	82.5	34034.8	33697.1	17878.8	16911.4	16644.8	16398.2	30874.1	29306.2	164.8	13025.6	15937.4	15811.5
High	Master Protein	P53278	Uncharacterized protein YGR130C OS=Saccharomyces cerevisiae (strain ATCC 204508 / S288c) OX=559292 GN=YGR130C PE=1 SV=1	1.226	0.29	0.0113121	107.9	88	30951.6	32872.8	27626.4	24957.8	25246.3	25750.5	28077.2	28589.3	254.6	19223.2	24173.4	24829.3
High	Master Protein	P39079	T-complex protein 1 subunit zeta OS=Saccharomyces cerevisiae (strain ATCC 204508 / S288c) OX=559292 GN=CCT6 PE=1 SV=1	0.883	-0.18	0.0168905	87.9	99.6	42118.9	38786.5	38542.8	43910.9	43326.7	43953.3	38207.5	33732.4	355.2	33821.4	41485.4	42380.9
High	Master Protein	Q02892	Nucleolar GTP-binding protein 1 OS=Saccharomyces cerevisiae (strain ATCC 204508 / S288c) OX=559292 GN=NOG1 PE=1 SV=1	0.77	-0.38	0.0369742	82.8	107.5	33207.7	31929.4	40319.7	43108.8	44521.2	41677	30123.8	27768.8	371.6	33203.6	42629.1	40186
High	Master Protein	P14906	Protein translocation protein SEC63 OS=Saccharomyces cerevisiae (strain ATCC 204508 / S288c) OX=559292 GN=SEC63 PE=1 SV=2	1.021	0.03	0.865971	97.6	95.6	44581.6	41639.4	47225	44164.2	43646.2	41744.1	40441.4	36213.5	435.2	34016.4	41791.3	40250.7
High	Master Protein	Q03532	ATP-dependent RNA helicase HAS1 OS=Saccharomyces cerevisiae (strain ATCC 204508 / S288c) OX=559292 GN=HAS1 PE=1 SV=1	0.924	-0.11	0.0903027	96.8	104.8	40850.1	40023.5	42724	44194.8	43886.5	44474	37056.4	34808.2	393.7	34040.1	42021.4	42883
High	Master Protein	P36013	NAD-dependent malic enzyme, mitochondrial OS=Saccharomyces cerevisiae (strain ATCC 204508 / S288c) OX=559292 GN=MAE1 PE=1 SV=1	1.143	0.19	0.276445	105.9	92.7	29835.1	27859.8	24450.7	25414.6	24370.7	24010.8	27064.4	24229.5	225.3	19575	23335	23151.8
High	Master Protein	P30665	DNA replication licensing factor MCM4 OS=Saccharomyces cerevisiae (strain ATCC 204508 / S288c) OX=559292 GN=MCM4 PE=1 SV=2	1.135	0.18	0.0163355	103.9	91.6	17313.3	17995	16470	15916.8	15260	15229.8	15705.4	15650.2	151.8	12259.5	14611.5	14684.9
High	Master Protein	P32356	Neutral trehalase OS=Saccharomyces cerevisiae (strain ATCC 204508 / S288c) OX=559292 GN=NTH1 PE=1 SV=3	1.496	0.58	0.0305829	100.1	67	25172.1	26671.4	18531.8	17143.2	16830.3	16562	22834.5	23195.9	170.8	13204.2	16115	15969.5
High	Master Protein	P32898	Mitochondrial presequence protease OS=Saccharomyces cerevisiae (strain ATCC 204508 / S288c) OX=559292 GN=CYM1 PE=1 SV=2	1.022	0.03	0.981709	96.5	94.4	16849.1	17792.1	13944.7	17379	16481.5	15616.5	15284.4	15473.7	128.5	13385.8	15781.1	15057.8
High	Master Protein	P09435	Heat shock protein SSA3 OS=Saccharomyces cerevisiae (strain ATCC 204508 / S288c) OX=559292 GN=SSA3 PE=1 SV=3	2.392	1.26	5.78406e-05	97.4	40.7	613.3	783.4	820.8	314.2	327.6	352.3	556.3	681.3	7.6	242	313.6	339.7
High	Master Protein	P10614	Lanosterol 14-alpha demethylase OS=Saccharomyces cerevisiae (strain ATCC 204508 / S288c) OX=559292 GN=ERG11 PE=1 SV=1	0.807	-0.31	0.0486304	86.6	107.3	33802.1	32465.3	39101.5	44446.2	41890.5	40680	30663	28234.8	360.3	34233.7	40110.2	39224.6
High	Master Protein	P12612	T-complex protein 1 subunit alpha OS=Saccharomyces cerevisiae (strain ATCC 204508 / S288c) OX=559292 GN=TCP1 PE=1 SV=2	0.919	-0.12	0.016406	90.1	98	57332	52896.9	57241.8	64553.4	62260.6	60182.7	52007.8	46004.1	527.5	49720.8	59614.6	58029.7
High	Master Protein	Q06679	U3 small nucleolar RNA-associated protein 4 OS=Saccharomyces cerevisiae (strain ATCC 204508 / S288c) OX=559292 GN=UTP4 PE=1 SV=1	1.07	0.1	0.053618	106.8	99.7	36735.6	35887.8	40052	34565.8	34321.4	33875.1	33324.1	31211.4	369.1	26623.5	32862.8	32663.2
High	Master Protein	P24280	SEC14 cytosolic factor OS=Saccharomyces cerevisiae (strain ATCC 204508 / S288c) OX=559292 GN=SEC14 PE=1 SV=3	0.656	-0.61	0.0939205	80	122	46725.5	49866.5	73504.7	79604.7	71655.3	75991.9	42386.3	43368.6	677.4	61313.7	68610	73273.3
High	Master Protein	P53090	Aromatic/aminoadipate aminotransferase 1 OS=Saccharomyces cerevisiae (strain ATCC 204508 / S288c) OX=559292 GN=ARO8 PE=1 SV=1	1.114	0.16	0.0267812	103.2	92.7	85183.8	84588.6	79959.4	75949.5	74384.1	76841.3	77273.1	73566.2	736.8	58498.4	71222.9	74092.3
High	Master Protein	P17505	Malate dehydrogenase, mitochondrial OS=Saccharomyces cerevisiae (strain ATCC 204508 / S288c) OX=559292 GN=MDH1 PE=1 SV=2	1.231	0.3	0.198613	99.3	80.7	32220.3	36191.1	25714.3	26170.6	26188.5	25871.9	29228.1	31475.2	237	20157.3	25075.6	24946.3
High	Master Protein	P17555	Adenylyl cyclase-associated protein OS=Saccharomyces cerevisiae (strain ATCC 204508 / S288c) OX=559292 GN=SRV2 PE=1 SV=1	1.393	0.48	0.275321	107.4	77.1	42235.3	43630.2	29645.9	33212.2	30314.4	30289.8	38313	37944.9	273.2	25581	29026.1	29206.2
High	Master Protein	Q12464	RuvB-like protein 2 OS=Saccharomyces cerevisiae (strain ATCC 204508 / S288c) OX=559292 GN=RVB2 PE=1 SV=1	1.018	0.03	0.713843	99.1	97.3	42529.5	43543.5	43944.9	41225.8	43432.5	42757.1	38580	37869.5	405	31753.2	41586.7	41227.5
High	Master Protein	P53261	Pescadillo homolog OS=Saccharomyces cerevisiae (strain ATCC 204508 / S288c) OX=559292 GN=NOP7 PE=1 SV=1	1.183	0.24	0.00334995	106.5	90.1	37051.6	35697.1	36527	32816.8	30875.8	30796.8	33610.7	31045.6	336.6	25276.4	29563.6	29695.1
High	Master Protein	P00950	Phosphoglycerate mutase 1 OS=Saccharomyces cerevisiae (strain ATCC 204508 / S288c) OX=559292 GN=GPM1 PE=1 SV=3	1.216	0.28	0.766599	115.1	94.6	404953	370014	249883	304205	270942	314553	367346	321799	2302.7	234307	259428	303300
High	Master Protein	P20967	2-oxoglutarate dehydrogenase, mitochondrial OS=Saccharomyces cerevisiae (strain ATCC 204508 / S288c) OX=559292 GN=KGD1 PE=1 SV=2	1.375	0.46	0.0295152	107.2	78	42376.8	45230.3	33621.6	31490	30827.5	30658.2	38441.4	39336.5	309.8	24254.5	29517.4	29561.4
High	Master Protein	P38853	Kelch repeat-containing protein 1 OS=Saccharomyces cerevisiae (strain ATCC 204508 / S288c) OX=559292 GN=KEL1 PE=1 SV=1	1.11	0.15	0.152178	108.9	98.1	14365	14770.4	13219.4	13089.5	12736.6	12941.3	13031	12845.7	121.8	10081.9	12195.3	12478.3
High	Master Protein	P40215	External NADH-ubiquinone oxidoreductase 1, mitochondrial OS=Saccharomyces cerevisiae (strain ATCC 204508 / S288c) OX=559292 GN=NDE1 PE=1 SV=1	1.13	0.18	0.431619	106.2	94	74917.5	91679.8	63216.8	66729.8	66305	66158.4	67960.2	79733.3	582.6	51397.1	63487.1	63791.6
High	Master Protein	P53549	26S proteasome subunit RPT4 OS=Saccharomyces cerevisiae (strain ATCC 204508 / S288c) OX=559292 GN=RPT4 PE=1 SV=4	1.225	0.29	0.127744	102.9	84	46790.3	47051.6	85407.6	39906.7	38401.9	37679.4	42445	40920.5	787	30737.2	36769.9	36331.4
High	Master Protein	P32319	Vacuolar protein sorting/targeting protein VPS10 OS=Saccharomyces cerevisiae (strain ATCC 204508 / S288c) OX=559292 GN=PEP1 PE=1 SV=1	0.94	-0.09	0.0616982	92.5	98.4	17873.4	17123.3	17235	18864.1	18262.2	18331.3	16213.5	14892.1	158.8	14529.7	17486.1	17675.5
High	Master Protein	P41805	60S ribosomal protein L10 OS=Saccharomyces cerevisiae (strain ATCC 204508 / S288c) OX=559292 GN=RPL10 PE=1 SV=1	0.759	-0.4	0.0118381	91	119.9	289369	281704	234532	337695	370948	376825	262496	244996	2161.3	260102	355183	363344
High	Master Protein	P28273	5-oxoprolinase OS=Saccharomyces cerevisiae (strain ATCC 204508 / S288c) OX=559292 GN=OXP1 PE=1 SV=2	1	0	0.950272	101.2	101.2	15049.4	15672.1	17383.7	15950.7	15668.4	15357	13651.8	13630	160.2	12285.7	15002.5	14807.6
High	Master Protein	P47771	Aldehyde dehydrogenase [NAD(P)+] 1 OS=Saccharomyces cerevisiae (strain ATCC 204508 / S288c) OX=559292 GN=ALD2 PE=1 SV=2	1.026	0.04	0.705576	81.8	79.7	5002	5446.8	7082.3	5599.6	5310.2	4808.3	4537.5	4737	65.3	4312.9	5084.6	4636.2
High	Master Protein	P17442	Phosphate system positive regulatory protein PHO81 OS=Saccharomyces cerevisiae (strain ATCC 204508 / S288c) OX=559292 GN=PHO81 PE=1 SV=2	0.717	-0.48	0.146695	74.4	103.8	14048.7	14832.1	20611.4	20686.5	21328.5	19773	12744.1	12899.4	189.9	15933.3	20422.1	19065.6
High	Master Protein	P53303	Zinc finger protein ZPR1 OS=Saccharomyces cerevisiae (strain ATCC 204508 / S288c) OX=559292 GN=ZPR1 PE=1 SV=1	1.144	0.19	0.423629	120.1	105	57792.7	59649.5	185653	50689.4	52147.9	58173.9	52425.7	51876.7	1710.8	39042.3	49931.7	56092.7
High	Master Protein	P04840	Mitochondrial outer membrane protein porin 1 OS=Saccharomyces cerevisiae (strain ATCC 204508 / S288c) OX=559292 GN=POR1 PE=1 SV=4	1.038	0.05	0.442187	78.5	75.6	94266.4	95633.3	126777	95759	92095.7	89525.6	85512.2	83171.6	1168.3	73756.2	88181.8	86322.9
High	Master Protein	P36016	Heat shock protein 70 homolog LHS1 OS=Saccharomyces cerevisiae (strain ATCC 204508 / S288c) OX=559292 GN=LHS1 PE=1 SV=1	0.901	-0.15	0.221414	91.3	101.3	18816.9	19123.8	21392.3	21222.7	21723	20860	17069.5	16631.8	197.1	16346.3	20799.8	20113.8
High	Master Protein	P32657	Chromo domain-containing protein 1 OS=Saccharomyces cerevisiae (strain ATCC 204508 / S288c) OX=559292 GN=CHD1 PE=1 SV=1	0.801	-0.32	0.635373	92.9	116	7792.5	7970.7	11381.9	10291.2	9953.1	9838.6	7068.9	6932	104.9	7926.5	9530.1	9486.6
High	Master Protein	Q12466	Tricalbin-1 OS=Saccharomyces cerevisiae (strain ATCC 204508 / S288c) OX=559292 GN=TCB1 PE=1 SV=1	1.038	0.05	0.891589	101.5	97.8	21670.8	22247	19777.6	20882.1	20296.3	21008.9	19658.3	19348.1	182.3	16084	19433.8	20257.3
High	Master Protein	Q12176	Ribosome biogenesis protein MAK21 OS=Saccharomyces cerevisiae (strain ATCC 204508 / S288c) OX=559292 GN=MAK21 PE=1 SV=1	0.905	-0.14	0.963659	96.5	106.7	23107.8	22926.5	27862.2	25676.9	25542.5	24324.7	20961.9	19939.1	256.8	19777.1	24457	23454.5
High	Master Protein	P00937	Multifunctional tryptophan biosynthesis protein OS=Saccharomyces cerevisiae (strain ATCC 204508 / S288c) OX=559292 GN=TRP3 PE=1 SV=2	1.338	0.42	1.54441e-05	110.8	82.8	59319.2	54809.8	53656.5	40948.7	41080.8	40955.5	53810.4	47667.7	494.5	31539.8	39334.9	39490.3
High	Master Protein	P39993	ARF guanine-nucleotide exchange factor 2 OS=Saccharomyces cerevisiae (strain ATCC 204508 / S288c) OX=559292 GN=GEA2 PE=1 SV=1	0.904	-0.15	0.910627	92.9	102.7	9509.2	10208.3	12548.2	11601.6	11288.5	10669.9	8626.1	8878.1	115.6	8935.9	10808.8	10288.2
High	Master Protein	P37297	Phosphatidylinositol 4-kinase STT4 OS=Saccharomyces cerevisiae (strain ATCC 204508 / S288c) OX=559292 GN=STT4 PE=1 SV=1	0.975	-0.04	0.845212	100.1	102.7	12230	12780.9	13383.9	14253	13111.9	12511.9	11094.2	11115.5	123.3	10978	12554.7	12064.3
High	Master Protein	P36112	MICOS complex subunit MIC60 OS=Saccharomyces cerevisiae (strain ATCC 204508 / S288c) OX=559292 GN=MIC60 PE=1 SV=1	1.254	0.33	0.261579	103.8	82.8	22430.9	24952.8	17285	18397.5	17613.5	17890.7	20347.9	21701.3	159.3	14170.3	16865	17250.7
High	Master Protein	Q12109	Tryptophan--tRNA ligase, cytoplasmic OS=Saccharomyces cerevisiae (strain ATCC 204508 / S288c) OX=559292 GN=WRS1 PE=1 SV=1	0.976	-0.04	0.99998	98	100.5	55161.4	51413.4	61058.9	54396	56566.1	56523.7	50038.7	44713.9	562.7	41897.3	54162.1	54501.5
High	Master Protein	Q02792	5'-3' exoribonuclease 2 OS=Saccharomyces cerevisiae (strain ATCC 204508 / S288c) OX=559292 GN=RAT1 PE=1 SV=3	1.005	0.01	0.663259	102.4	101.9	16547	16820	20552.4	16850.2	16728.6	16583	15010.3	14628.3	189.4	12978.5	16017.6	15989.7
High	Master Protein	P80210	Adenylosuccinate synthetase OS=Saccharomyces cerevisiae (strain ATCC 204508 / S288c) OX=559292 GN=ADE12 PE=1 SV=3	1.27	0.34	0.0814557	106	83.5	54984.3	52915.8	42430.4	41662.3	41763.3	40369.4	49878.1	46020.5	391	32089.4	39988.4	38925.2
High	Master Protein	P53742	Nucleolar GTP-binding protein 2 OS=Saccharomyces cerevisiae (strain ATCC 204508 / S288c) OX=559292 GN=NOG2 PE=1 SV=1	0.721	-0.47	0.689788	84.1	116.7	23312.7	23091.1	39672.2	32758.3	31957.1	32331	21147.8	20082.2	365.6	25231.4	30599	31174.4
High	Master Protein	P37012	Phosphoglucomutase 2 OS=Saccharomyces cerevisiae (strain ATCC 204508 / S288c) OX=559292 GN=PGM2 PE=1 SV=1	1.976	0.98	0.0242793	107.1	54.2	51811.5	53242.9	31570.3	26060.6	28109.9	26219.7	46999.9	46305	290.9	20072.6	26915.3	25281.7
High	Master Protein	P14922	General transcriptional corepressor CYC8 OS=Saccharomyces cerevisiae (strain ATCC 204508 / S288c) OX=559292 GN=CYC8 PE=1 SV=2	1.052	0.07	0.0848478	98.1	93.2	16494.9	17022	17036.4	16289.6	16173.7	15909	14963.1	14803.9	157	12546.7	15486.4	15339.9
High	Master Protein	P33299	26S proteasome regulatory subunit 7 homolog OS=Saccharomyces cerevisiae (strain ATCC 204508 / S288c) OX=559292 GN=RPT1 PE=1 SV=1	1.11	0.15	0.548156	103.5	93.3	51351.9	52165.2	44237.6	46277.2	46972.4	45738	46583	45367.7	407.7	35644	44976.1	44101.7
High	Master Protein	P53312	Succinate--CoA ligase [ADP-forming] subunit beta, mitochondrial OS=Saccharomyces cerevisiae (strain ATCC 204508 / S288c) OX=559292 GN=LSC2 PE=1 SV=1	1.271	0.35	0.00211532	92.5	72.8	37654.4	42588.7	35268.4	29628.5	29929.6	29213.1	34157.6	37039.1	325	22820.7	28657.7	28168
High	Master Protein	P22213	Protein SLY1 OS=Saccharomyces cerevisiae (strain ATCC 204508 / S288c) OX=559292 GN=SLY1 PE=1 SV=1	1.219	0.29	0.0380589	106.9	87.7	21237.9	20931.8	30322.6	16530.4	17452.7	17419.8	19265.6	18204.2	279.4	12732.1	16711	16796.6
High	Master Protein	P20448	ATP-dependent RNA helicase HCA4 OS=Saccharomyces cerevisiae (strain ATCC 204508 / S288c) OX=559292 GN=HCA4 PE=1 SV=2	1.046	0.06	0.999967	105.3	100.7	20411.6	19708.6	16741.5	19264.9	18846.5	18664.6	18516	17140.4	154.3	14838.3	18045.5	17996.9
High	Master Protein	Q04781	E3 ubiquitin-protein ligase listerin OS=Saccharomyces cerevisiae (strain ATCC 204508 / S288c) OX=559292 GN=RKR1 PE=1 SV=1	1.14	0.19	0.579232	107.3	94.2	15516.8	15489.1	12567.2	13592.1	13700.9	13055.4	14075.8	13470.8	115.8	10469	13118.6	12588.3
High	Master Protein	P38715	NADPH-dependent aldose reductase GRE3 OS=Saccharomyces cerevisiae (strain ATCC 204508 / S288c) OX=559292 GN=GRE3 PE=1 SV=1	1.74	0.8	0.0274317	113.4	65.2	48737	54759	32549.8	29586.5	28013.8	25931.2	44210.9	47623.5	300	22788.4	26823.2	25003.5
High	Master Protein	P10659	S-adenosylmethionine synthase 1 OS=Saccharomyces cerevisiae (strain ATCC 204508 / S288c) OX=559292 GN=SAM1 PE=1 SV=2	0.93	-0.1	0.289659	103.2	111	30170.8	27045.6	29825.9	29288.9	33854.5	32058.2	27368.9	23521.4	274.9	22559.1	32415.7	30911.3
High	Master Protein	P09938	Ribonucleoside-diphosphate reductase small chain 1 OS=Saccharomyces cerevisiae (strain ATCC 204508 / S288c) OX=559292 GN=RNR2 PE=1 SV=2	0.616	-0.7	0.00225767	79.5	129.1	45466.1	50997.9	62484.7	82781	78639.6	83023.7	41243.8	44352.5	575.8	63760.2	75297.5	80053.5
High	Master Protein	P08417	Fumarate hydratase, mitochondrial OS=Saccharomyces cerevisiae (strain ATCC 204508 / S288c) OX=559292 GN=FUM1 PE=1 SV=2	1.025	0.04	0.666902	88.2	86	36052.7	37929.8	42335.9	37874.7	36989.4	35990.6	32704.6	32987.3	390.1	29172.1	35417.4	34703
High	Master Protein	P41277	Glycerol-1-phosphate phosphohydrolase 1 OS=Saccharomyces cerevisiae (strain ATCC 204508 / S288c) OX=559292 GN=GPP1 PE=1 SV=3	0.738	-0.44	0.202773	83.3	112.8	86019.8	83623.1	117866	117344	111672	116502	78031.4	72726.5	1086.2	90381.4	106926	112335
High	Master Protein	Q04225	Ribosome assembly protein RRB1 OS=Saccharomyces cerevisiae (strain ATCC 204508 / S288c) OX=559292 GN=RRB1 PE=1 SV=1	0.823	-0.28	0.520623	91.7	111.5	23383.6	22382	30427.8	28524.5	27392.4	28416.1	21212.1	19465.5	280.4	21970.4	26228.3	27399.5
High	Master Protein	P18899	Stress protein DDR48 OS=Saccharomyces cerevisiae (strain ATCC 204508 / S288c) OX=559292 GN=DDR48 PE=1 SV=4	0.976	-0.04	0.688726	96	98.4	20907.7	26345.9	29201.4	27004.5	26269.4	29934.3	18966.1	22912.8	269.1	20799.6	25153	28863.4
High	Master Protein	Q06344	Pre-rRNA-processing protein ESF1 OS=Saccharomyces cerevisiae (strain ATCC 204508 / S288c) OX=559292 GN=ESF1 PE=1 SV=1	1.282	0.36	0.000436063	115.6	90.2	25013.2	25386	27945.5	20674.7	19424.4	19806.4	22690.4	22078	257.5	15924.2	18598.8	19097.8
High	Master Protein	P32457	Cell division control protein 3 OS=Saccharomyces cerevisiae (strain ATCC 204508 / S288c) OX=559292 GN=CDC3 PE=1 SV=3	1.071	0.1	0.176625	98.2	91.7	42107.3	42733.9	49653.2	39038.6	41392.2	39889.4	38197	37165.4	457.6	30068.6	39633.1	38462.3
High	Master Protein	P25623	Suppressor of yeast profilin deletion OS=Saccharomyces cerevisiae (strain ATCC 204508 / S288c) OX=559292 GN=SYP1 PE=1 SV=3	2.026	1.02	0.0184614	147.2	72.7	43747.9	46367	26391.5	21644	21435	21589.1	39685.2	40325	243.2	16670.8	20524.1	20816.8
High	Master Protein	P39692	Sulfite reductase [NADPH] flavoprotein component OS=Saccharomyces cerevisiae (strain ATCC 204508 / S288c) OX=559292 GN=MET10 PE=1 SV=2	0.675	-0.57	0.0147578	95.8	141.9	11738.2	11307.8	14843.4	17389.2	17776.6	16739.3	10648.1	9834.3	136.8	13393.6	17021.2	16140.5
High	Master Protein	P54885	Gamma-glutamyl phosphate reductase OS=Saccharomyces cerevisiae (strain ATCC 204508 / S288c) OX=559292 GN=PRO2 PE=1 SV=1	1.079	0.11	0.218375	105.5	97.8	60969.7	59752.7	80046.8	56489.9	55820	57755.3	55307.7	51966.5	737.6	43510	53447.7	55689.1
High	Master Protein	P09064	Eukaryotic translation initiation factor 2 subunit beta OS=Saccharomyces cerevisiae (strain ATCC 204508 / S288c) OX=559292 GN=SUI3 PE=1 SV=2	0.896	-0.16	0.119353	93.6	104.5	62270.8	60159	59840.2	61916.3	67143	67621.2	56487.9	52319.9	551.4	47689.6	64289.5	65202.1
High	Master Protein	P39936	Eukaryotic initiation factor 4F subunit p130 OS=Saccharomyces cerevisiae (strain ATCC 204508 / S288c) OX=559292 GN=TIF4632 PE=1 SV=1	1.181	0.24	0.316347	108.7	92	14733.7	15196.9	12010.2	12773	12471.2	12048.6	13365.4	13216.6	110.7	9838.1	11941.2	11617.6
High	Master Protein	Q01476	Ubiquitin carboxyl-terminal hydrolase 2 OS=Saccharomyces cerevisiae (strain ATCC 204508 / S288c) OX=559292 GN=UBP2 PE=1 SV=2	1.195	0.26	0.238259	110.7	92.6	13887	14582.7	11528.9	12158.9	11619.4	11004.2	12597.3	12682.5	106.2	9365.1	11125.6	10610.6
High	Master Protein	Q08641	tRNA(Thr) (cytosine(32)-N(3))-methyltransferase OS=Saccharomyces cerevisiae (strain ATCC 204508 / S288c) OX=559292 GN=ABP140 PE=1 SV=3	0.948	-0.08	0.114248	101.6	107.2	31557.7	33005.7	31426.7	33285.2	32954.3	33988.5	28627.1	28704.9	289.6	25637.2	31553.8	32772.6
High	Master Protein	P40495	Homoisocitrate dehydrogenase, mitochondrial OS=Saccharomyces cerevisiae (strain ATCC 204508 / S288c) OX=559292 GN=LYS12 PE=1 SV=1	1.421	0.51	0.0468816	116.2	81.8	64641.1	60863.2	45576.4	43312.1	42842.6	42308.3	58638.1	52932.4	420	33360.1	41021.9	40794.7
High	Master Protein	P14907	Nucleoporin NSP1 OS=Saccharomyces cerevisiae (strain ATCC 204508 / S288c) OX=559292 GN=NSP1 PE=1 SV=1	0.921	-0.12	0.992098	92.2	100.2	31254.1	31897.1	41197.6	34090.5	36876.1	34650.1	28351.7	27740.7	379.6	26257.4	35308.9	33410.5
High	Master Protein	P22579	Transcriptional regulatory protein SIN3 OS=Saccharomyces cerevisiae (strain ATCC 204508 / S288c) OX=559292 GN=SIN3 PE=1 SV=2	0.885	-0.18	0.948931	94	106.2	11828.3	12551	16560.1	14182	14404.8	13710.1	10729.8	10915.5	152.6	10923.4	13792.6	13219.6
High	Master Protein	Q02931	NET1-associated nuclear protein 1 OS=Saccharomyces cerevisiae (strain ATCC 204508 / S288c) OX=559292 GN=NAN1 PE=1 SV=1	1.024	0.03	0.419146	104.2	101.7	30894.1	30909.6	31838.2	30180	30663.7	29657.8	28025.1	26881.9	293.4	23245.5	29360.5	28596.8
High	Master Protein	Q06218	ATP-dependent RNA helicase DBP9 OS=Saccharomyces cerevisiae (strain ATCC 204508 / S288c) OX=559292 GN=DBP9 PE=1 SV=1	1.234	0.3	0.536016	113	91.6	35575.6	35329.3	26225.4	28630	29129.2	28619.4	32271.8	30725.7	241.7	22051.6	27891.2	27595.5
High	Master Protein	P0CX57	Transposon Ty1-A Gag polyprotein OS=Saccharomyces cerevisiae (strain ATCC 204508 / S288c) OX=559292 GN=TY1A-A PE=2 SV=1	0.998	0	0.644976	110.8	111	3584.8	3529.8	8109.7	3763.4	3582.2	3590.5	3251.8	3069.9	74.7	2898.7	3430	3462.1
High	Master Protein	P12695	Dihydrolipoyllysine-residue acetyltransferase component of pyruvate dehydrogenase complex, mitochondrial OS=Saccharomyces cerevisiae (strain ATCC 204508 / S288c) OX=559292 GN=LAT1 PE=1 SV=1	1.592	0.67	0.153816	114.1	71.7	93071	87449.6	54010	54922	54682.1	55508.3	84427.8	76054.4	497.7	42302.4	52358.2	53522.5
High	Master Protein	P49095	Glycine dehydrogenase (decarboxylating), mitochondrial OS=Saccharomyces cerevisiae (strain ATCC 204508 / S288c) OX=559292 GN=GCV2 PE=1 SV=1	4.207	2.07	0.05457	208	49.4	37435.5	39404.3	10944.1	9277.7	8897.9	8893.3	33959	34269.6	100.9	7145.9	8519.8	8575.1
High	Master Protein	P12688	Serine/threonine-protein kinase YPK1 OS=Saccharomyces cerevisiae (strain ATCC 204508 / S288c) OX=559292 GN=YPK1 PE=1 SV=2	1.106	0.15	0.077359	99.4	89.8	21900.1	23282.3	20892.9	20627.5	19796.7	18205.9	19866.3	20248.5	192.5	15887.9	18955.3	17554.6
High	Master Protein	P16649	General transcriptional corepressor TUP1 OS=Saccharomyces cerevisiae (strain ATCC 204508 / S288c) OX=559292 GN=TUP1 PE=1 SV=2	1.307	0.39	0.128585	121.9	93.3	55326.5	57993.2	42219.3	42440.7	41963.6	42320.9	50188.6	50436.3	389.1	32689	40180.2	40806.8
High	Master Protein	P11412	Glucose-6-phosphate 1-dehydrogenase OS=Saccharomyces cerevisiae (strain ATCC 204508 / S288c) OX=559292 GN=ZWF1 PE=1 SV=4	0.728	-0.46	0.0122314	83.2	114.3	51981.2	54283.7	65452	74591.7	76629.8	72243.5	47153.8	47210.2	603.2	57452.6	73373.2	69659
High	Master Protein	P43597	Uncharacterized protein YFR016C OS=Saccharomyces cerevisiae (strain ATCC 204508 / S288c) OX=559292 GN=YFR016C PE=1 SV=1	1.188	0.25	0.0208106	110.1	92.7	7280.5	7690.5	6688.8	6373.7	5851.6	6128.2	6604.4	6688.4	61.6	4909.2	5602.9	5909
High	Master Protein	P39683	Nicotinate phosphoribosyltransferase OS=Saccharomyces cerevisiae (strain ATCC 204508 / S288c) OX=559292 GN=NPT1 PE=1 SV=3	1.006	0.01	0.712055	106.9	106.3	51563.6	51823.7	44207	51422.6	51243.9	51257.4	46775	45070.7	407.4	39607.1	49066.1	49423.7
High	Master Protein	P29469	DNA replication licensing factor MCM2 OS=Saccharomyces cerevisiae (strain ATCC 204508 / S288c) OX=559292 GN=MCM2 PE=1 SV=2	1.252	0.32	0.000129936	109.7	87.7	13464	13907.9	13232.6	11203.4	10756.5	10648.8	12213.6	12095.6	121.9	8629.1	10299.4	10267.8
High	Master Protein	P40991	25S rRNA (cytosine(2870)-C(5))-methyltransferase OS=Saccharomyces cerevisiae (strain ATCC 204508 / S288c) OX=559292 GN=NOP2 PE=1 SV=1	1.002	0	0.985221	97	96.8	39506.1	38214.3	38282.1	41020.4	38203.3	37989.4	35837.3	33234.7	352.8	31595.1	36579.7	36630.3
High	Master Protein	P22276	DNA-directed RNA polymerase III subunit RPC2 OS=Saccharomyces cerevisiae (strain ATCC 204508 / S288c) OX=559292 GN=RET1 PE=1 SV=2	1.143	0.19	0.116755	109.9	96.1	19680.9	20135.5	27223	18420.7	17613	17443.4	17853.2	17511.7	250.9	14188.1	16864.5	16819.3
High	Master Protein	P37292	Serine hydroxymethyltransferase, mitochondrial OS=Saccharomyces cerevisiae (strain ATCC 204508 / S288c) OX=559292 GN=SHM1 PE=1 SV=2	0.447	-1.16	0.0142334	59	131.9	42015.8	41872.5	73516.7	95590.4	93994.6	91464.2	38114	36416.2	677.5	73626.3	89999.9	88192.1
High	Master Protein	P46680	Actin-interacting protein 1 OS=Saccharomyces cerevisiae (strain ATCC 204508 / S288c) OX=559292 GN=AIP1 PE=1 SV=1	1.372	0.46	0.00250381	105.7	77	36530.2	32213.1	28993.4	23245.4	23658.8	23486.7	33137.8	28015.5	267.2	17904.3	22653.3	22646.4
High	Master Protein	P36161	Nucleoporin NUP133 OS=Saccharomyces cerevisiae (strain ATCC 204508 / S288c) OX=559292 GN=NUP133 PE=1 SV=1	1.032	0.05	0.513681	99.8	96.7	13108.3	13870.5	13380.8	12964.4	12964.6	12786.5	11890.9	12063.1	123.3	9985.5	12413.7	12329.1
High	Master Protein	P0C2I8	Transposon Ty1-LR4 Gag polyprotein OS=Saccharomyces cerevisiae (strain ATCC 204508 / S288c) OX=559292 GN=TY1A-LR4 PE=2 SV=1	1.382	0.47	0.00243368	130.6	94.5	1318	1366.7	1146.9	929.3	954	984.3	1195.6	1188.6	10.6	715.7	913.4	949.1
High	Master Protein	Q03195	Translation initiation factor RLI1 OS=Saccharomyces cerevisiae (strain ATCC 204508 / S288c) OX=559292 GN=RLI1 PE=1 SV=1	1.116	0.16	0.00699719	104.5	93.7	83663.3	78649.7	83406.4	74906.4	74725.1	73315.2	75893.8	68401.2	768.6	57695	71549.4	70692.3
High	Master Protein	P37303	Low specificity L-threonine aldolase OS=Saccharomyces cerevisiae (strain ATCC 204508 / S288c) OX=559292 GN=GLY1 PE=1 SV=2	1.144	0.19	0.655402	124.3	108.7	82117	78518.6	63611.2	71312.8	68634	66135.4	74491.1	68287.1	586.2	54927	65717.1	63769.4
High	Master Protein	Q92392	Transposon Ty1-OL Gag polyprotein OS=Saccharomyces cerevisiae (strain ATCC 204508 / S288c) OX=559292 GN=TY1A-OL PE=2 SV=1
High	Master Protein	P36006	Myosin-3 OS=Saccharomyces cerevisiae (strain ATCC 204508 / S288c) OX=559292 GN=MYO3 PE=1 SV=4	1.118	0.16	0.546922	96.6	86.4	7124.6	7520.9	6115.5	6347.3	6575.1	6372.8	6462.9	6540.9	56.4	4888.8	6295.7	6144.8
High	Master Protein	Q03940	RuvB-like protein 1 OS=Saccharomyces cerevisiae (strain ATCC 204508 / S288c) OX=559292 GN=RVB1 PE=1 SV=1	1.277	0.35	0.00327237	109.3	85.6	45722	43353.6	47229.1	39113.4	35806.3	34632.9	41476	37704.3	435.2	30126.2	34284.6	33393.9
High	Master Protein	P07256	Cytochrome b-c1 complex subunit 1, mitochondrial OS=Saccharomyces cerevisiae (strain ATCC 204508 / S288c) OX=559292 GN=COR1 PE=1 SV=1	1.06	0.08	0.345408	89.8	84.7	44814.8	46333.6	65028.8	44221.2	43708.7	42404.3	40653	40296	599.3	34060.4	41851.1	40887.3
High	Master Protein	P33332	Exocyst complex component SEC3 OS=Saccharomyces cerevisiae (strain ATCC 204508 / S288c) OX=559292 GN=SEC3 PE=1 SV=1	1.03	0.04	0.866796	97.6	94.7	7267.8	7562.4	8147.1	7790.3	7341.1	7284	6592.8	6577	75.1	6000.3	7029.1	7023.4
High	Master Protein	P47176	Branched-chain-amino-acid aminotransferase, cytosolic OS=Saccharomyces cerevisiae (strain ATCC 204508 / S288c) OX=559292 GN=BAT2 PE=1 SV=1	1.186	0.25	0.0229272	107.8	90.9	34820.8	31475.9	29490.5	25332.6	27116.8	26540.4	31587.1	27374.4	271.8	19511.8	25964.4	25591
High	Master Protein	P32597	Nuclear protein STH1/NPS1 OS=Saccharomyces cerevisiae (strain ATCC 204508 / S288c) OX=559292 GN=STH1 PE=1 SV=1	0.998	0	0.663053	101.3	101.4	23262.3	23191.7	25793.6	23644.4	23302.3	22905.3	21102	20169.6	237.7	18211.6	22312	22085.9
High	Master Protein	P07267	Saccharopepsin OS=Saccharomyces cerevisiae (strain ATCC 204508 / S288c) OX=559292 GN=PEP4 PE=1 SV=1	1.329	0.41	0.00445151	108.4	81.6	46395.5	51845.9	41167.6	35230.8	34526.8	34922.4	42086.9	45090.1	379.4	27135.7	33059.5	33673.1
High	Master Protein	P39744	Nucleolar complex protein 2 OS=Saccharomyces cerevisiae (strain ATCC 204508 / S288c) OX=559292 GN=NOC2 PE=1 SV=2	1.096	0.13	0.019929	101.2	92.4	49632.8	48113.8	51394.5	45295.4	46499.9	44427.7	45023.5	41844.2	473.6	34887.7	44523.7	42838.3
High	Master Protein	P38628	Phosphoacetylglucosamine mutase OS=Saccharomyces cerevisiae (strain ATCC 204508 / S288c) OX=559292 GN=PCM1 PE=1 SV=2	1.119	0.16	0.0721885	91.5	81.8	23753	25237.7	25461.8	23820.1	22547.2	22129.2	21547.1	21949.1	234.6	18346.9	21589	21337.5
High	Master Protein	P53691	Peptidyl-prolyl cis-trans isomerase CPR6 OS=Saccharomyces cerevisiae (strain ATCC 204508 / S288c) OX=559292 GN=CPR6 PE=1 SV=1	1.243	0.31	0.119573	110.7	89	86618.6	89720.4	69387.1	66456.3	70001	69660.5	78574.7	78029.2	639.4	51186.4	67026.1	67168.4
High	Master Protein	P48231	Tricalbin-2 OS=Saccharomyces cerevisiae (strain ATCC 204508 / S288c) OX=559292 GN=TCB2 PE=1 SV=1	0.63	-0.67	0.00020492	77.5	123	11350.5	11232.7	13137.5	17354.1	18488.9	18015.9	10296.4	9769	121.1	13366.6	17703.1	17371.4
High	Master Protein	P53883	Nucleolar protein 13 OS=Saccharomyces cerevisiae (strain ATCC 204508 / S288c) OX=559292 GN=NOP13 PE=1 SV=2	0.977	-0.03	0.696689	99.1	101.4	34921.8	34380	35944.9	35728.5	35202	35857.2	31678.7	29900.1	331.2	27519.1	33706	34574.4
High	Master Protein	Q02776	Mitochondrial import inner membrane translocase subunit TIM50 OS=Saccharomyces cerevisiae (strain ATCC 204508 / S288c) OX=559292 GN=TIM50 PE=1 SV=1	1.069	0.1	0.0278186	102.2	95.7	28780	30235.7	29367.5	28278	27484.5	27214.9	26107.3	26295.7	270.6	21780.5	26316.4	26241.3
High	Master Protein	Q06523	Uncharacterized protein YPR148C OS=Saccharomyces cerevisiae (strain ATCC 204508 / S288c) OX=559292 GN=YPR148C PE=1 SV=1	1.068	0.09	0.37525	100.7	94.3	28958.5	30813.6	26764	27118.4	26264.3	27828.7	26269.2	26798.4	246.6	20887.3	25148.1	26833.1
High	Master Protein	P47143	Adenosine kinase OS=Saccharomyces cerevisiae (strain ATCC 204508 / S288c) OX=559292 GN=ADO1 PE=1 SV=1	1.021	0.03	0.774049	102.2	100.1	53222.8	60049.8	73747.8	58840.1	50841.7	60632.2	48280.2	52224.9	679.6	45320.2	48681	58463.1
High	Master Protein	P32892	ATP-dependent RNA helicase DRS1 OS=Saccharomyces cerevisiae (strain ATCC 204508 / S288c) OX=559292 GN=DRS1 PE=1 SV=2	0.996	-0.01	0.648976	95	95.4	25120.3	25099.8	34410	25590.6	25223.2	25224.6	22787.4	21829.1	317.1	19710.6	24151.2	24322.2
High	Master Protein	P21304	Periodic tryptophan protein 1 OS=Saccharomyces cerevisiae (strain ATCC 204508 / S288c) OX=559292 GN=PWP1 PE=1 SV=1	1.067	0.09	0.994838	107	100.3	44046.2	43330.7	30891	41130	37651.5	40627.1	39955.8	37684.4	284.7	31679.5	36051.3	39173.7
High	Master Protein	P39516	40S ribosomal protein S14-B OS=Saccharomyces cerevisiae (strain ATCC 204508 / S288c) OX=559292 GN=RPS14B PE=1 SV=2	0.38	-1.39	2.73953e-06	41.1	107.9	1486.1	1574.5	1772.8	4138.4	3900.6	4203.6	1348.1	1369.3	16.3	3187.5	3734.8	4053.2
High	Master Protein	Q08208	Nucleolar protein 12 OS=Saccharomyces cerevisiae (strain ATCC 204508 / S288c) OX=559292 GN=NOP12 PE=1 SV=1	1.04	0.06	0.168909	102.3	98.4	32623.8	31675.7	31267	30767.1	30448.1	29950.9	29594.1	27548.2	288.1	23697.7	29154.1	28879.4
High	Master Protein	Q99287	Protein SEY1 OS=Saccharomyces cerevisiae (strain ATCC 204508 / S288c) OX=559292 GN=SEY1 PE=1 SV=1	0.972	-0.04	0.876065	95.8	98.5	19005.1	19798.4	25005.7	20361.6	20391.4	19408.8	17240.2	17218.5	230.4	15683.1	19524.8	18714.4
High	Master Protein	P22146	1,3-beta-glucanosyltransferase GAS1 OS=Saccharomyces cerevisiae (strain ATCC 204508 / S288c) OX=559292 GN=GAS1 PE=1 SV=2	1.027	0.04	0.985626	105.5	102.8	57589.8	51316.1	59047.5	56099	58041.3	55763.3	52241.7	44629.2	544.1	43209	55574.7	53768.4
High	Master Protein	P37291	Serine hydroxymethyltransferase, cytosolic OS=Saccharomyces cerevisiae (strain ATCC 204508 / S288c) OX=559292 GN=SHM2 PE=1 SV=2	1.227	0.3	7.20036e-05	104.1	84.8	113541	106320	104929	86632.9	87734.9	86143.4	102997	92465.4	966.9	66727.1	84006.3	83061.6
High	Master Protein	P25294	Protein SIS1 OS=Saccharomyces cerevisiae (strain ATCC 204508 / S288c) OX=559292 GN=SIS1 PE=1 SV=1	1.071	0.1	0.999282	105.5	98.5	65076.9	66618.6	53243.8	59599.4	62448	60764.3	59033.4	57937.7	490.7	45905.1	59794	58590.5
High	Master Protein	P34077	Nucleoporin NIC96 OS=Saccharomyces cerevisiae (strain ATCC 204508 / S288c) OX=559292 GN=NIC96 PE=1 SV=2	1.034	0.05	0.512597	98.6	95.4	20799.8	21203.2	23246.5	21420.4	20501.3	20151.5	18868.2	18440.2	214.2	16498.6	19630	19430.5
High	Master Protein	P53893	Ribosome assembly protein 1 OS=Saccharomyces cerevisiae (strain ATCC 204508 / S288c) OX=559292 GN=RIA1 PE=1 SV=1	1.052	0.07	0.343917	103.7	98.6	11678.5	11837.6	13363.5	11728.4	11071.7	11247.4	10594	10295.1	123.1	9033.5	10601.1	10845.1
High	Master Protein	Q06142	Importin subunit beta-1 OS=Saccharomyces cerevisiae (strain ATCC 204508 / S288c) OX=559292 GN=KAP95 PE=1 SV=1	1.031	0.04	0.610873	97	94.2	22003.6	22775.9	23868.3	22721.3	22098.2	22034.6	19960.2	19808	220	17500.6	21159.1	21246.4
High	Master Protein	Q04175	Importin beta SMX1 OS=Saccharomyces cerevisiae (strain ATCC 204508 / S288c) OX=559292 GN=SXM1 PE=1 SV=1	0.998	0	0.973552	106.3	106.5	32994	35317.7	28253	33190.2	33071.8	32093.5	29929.9	30715.6	260.4	25564	31666.3	30945.3
High	Master Protein	P06367	40S ribosomal protein S14-A OS=Saccharomyces cerevisiae (strain ATCC 204508 / S288c) OX=559292 GN=RPS14A PE=1 SV=5	0.759	-0.4	0.0018258	90.3	118.9	99791.7	97575.7	112476	131488	134738	130285	90524.4	84861	1036.5	101275	129012	125624
High	Master Protein	Q99207	Nucleolar complex protein 14 OS=Saccharomyces cerevisiae (strain ATCC 204508 / S288c) OX=559292 GN=NOP14 PE=1 SV=1	1.17	0.23	0.0144523	109.6	93.7	23190.4	22453.1	20369.5	19619.3	19197.1	19002.2	21036.8	19527.3	187.7	15111.4	18381.2	18322.4
High	Master Protein	P39705	Nucleoporin NUP60 OS=Saccharomyces cerevisiae (strain ATCC 204508 / S288c) OX=559292 GN=NUP60 PE=1 SV=1	0.914	-0.13	0.826931	92.1	100.8	14789.9	14152.9	17355.5	15565.6	16383.2	16185.2	13416.4	12308.6	159.9	11989	15686.9	15606.2
High	Master Protein	P00817	Inorganic pyrophosphatase OS=Saccharomyces cerevisiae (strain ATCC 204508 / S288c) OX=559292 GN=IPP1 PE=1 SV=4	0.703	-0.51	0.00486882	90.6	128.8	91017.5	87071.9	111326	129466	133660	128684	82565	75725.8	1025.9	99718.6	127979	124080
High	Master Protein	P47018	Maintenance of telomere capping protein 1 OS=Saccharomyces cerevisiae (strain ATCC 204508 / S288c) OX=559292 GN=MTC1 PE=1 SV=1	0.954	-0.07	0.492918	103.7	108.7	45181.7	49520.1	40057.3	47378.5	46434.6	51865.9	40985.8	43067.3	369.1	36492.2	44461.2	50010.4
High	Master Protein	Q05911	Adenylosuccinate lyase OS=Saccharomyces cerevisiae (strain ATCC 204508 / S288c) OX=559292 GN=ADE13 PE=1 SV=1	1.091	0.13	0.965919	101.4	93	34671	35124.4	28127.3	31788.2	31998.2	31202	31451.2	30547.4	259.2	24484.2	30638.3	30085.7
High	Master Protein	Q07457	E3 ubiquitin-protein ligase BRE1 OS=Saccharomyces cerevisiae (strain ATCC 204508 / S288c) OX=559292 GN=BRE1 PE=1 SV=1	1.223	0.29	0.0354648	114.6	93.7	16130.8	15927.1	13647.4	13215.6	12882.3	13027.3	14632.8	13851.7	125.8	10179	12334.8	12561.2
High	Master Protein	P39078	T-complex protein 1 subunit delta OS=Saccharomyces cerevisiae (strain ATCC 204508 / S288c) OX=559292 GN=CCT4 PE=1 SV=2	1.033	0.05	0.909305	100.2	97.1	44890	42965.9	47741.6	46161.7	43275.8	43470.6	40721.2	37367.1	439.9	35555	41436.6	41915.4
High	Master Protein	Q04728	Arginine biosynthesis bifunctional protein ArgJ, mitochondrial OS=Saccharomyces cerevisiae (strain ATCC 204508 / S288c) OX=559292 GN=ARG7 PE=1 SV=1	1.662	0.73	0.0030878	120.8	72.6	60325.1	57650.3	43851.2	34405.1	34906.6	34678.2	54723	50138.1	404.1	26499.7	33423.1	33437.6
High	Master Protein	P40327	26S proteasome regulatory subunit 4 homolog OS=Saccharomyces cerevisiae (strain ATCC 204508 / S288c) OX=559292 GN=RPT2 PE=1 SV=3	1.162	0.22	0.0032154	103.5	89	38599	37419.5	35233.1	32815.5	32193.2	31768.9	35014.4	32543.5	324.7	25275.4	30825.1	30632.4
High	Master Protein	Q12271	Polyphosphatidylinositol phosphatase INP53 OS=Saccharomyces cerevisiae (strain ATCC 204508 / S288c) OX=559292 GN=INP53 PE=1 SV=1	1.19	0.25	0.000340268	106.4	89.4	14455.6	15154.3	15864.5	12766	12730.6	12560.2	13113.1	13179.6	146.2	9832.7	12189.5	12110.9
High	Master Protein	P06106	Homocysteine/cysteine synthase OS=Saccharomyces cerevisiae (strain ATCC 204508 / S288c) OX=559292 GN=MET17 PE=1 SV=3	1.028	0.04	0.960206	119	115.8	110585	108623	87354.4	101340	108035	105659	100315	94468.4	805	78054.5	103444	101879
High	Master Protein	P36049	rRNA-processing protein EBP2 OS=Saccharomyces cerevisiae (strain ATCC 204508 / S288c) OX=559292 GN=EBP2 PE=1 SV=1	1.211	0.28	0.00175637	108.6	89.7	41397.3	38471.7	37674.9	31764.8	31392.3	33741.8	37552.8	33458.5	347.2	24466.1	30058.1	32534.7
High	Master Protein	P15424	ATP-dependent RNA helicase MSS116, mitochondrial OS=Saccharomyces cerevisiae (strain ATCC 204508 / S288c) OX=559292 GN=MSS116 PE=1 SV=1	0.98	-0.03	0.74165	93.6	95.5	20761.6	22845.5	22810.9	23887	23266.5	21795.1	18833.6	19868.5	210.2	18398.5	22277.7	21015.3
High	Master Protein	Q02821	Importin subunit alpha OS=Saccharomyces cerevisiae (strain ATCC 204508 / S288c) OX=559292 GN=SRP1 PE=1 SV=1	1.302	0.38	0.0802646	116	89.1	44581	44824.5	35079.7	35326.4	34245.2	33202.7	40440.9	38983.6	323.3	27209.4	32789.9	32014.8
High	Master Protein	P40850	Post-transcriptional regulator MKT1 OS=Saccharomyces cerevisiae (strain ATCC 204508 / S288c) OX=559292 GN=MKT1 PE=1 SV=2	0.974	-0.04	0.436724	97.7	100.3	34900	35791.2	35877.9	38452.8	36731.5	36049.2	31658.9	31127.4	330.6	29617.4	35170.4	34759.5
High	Master Protein	P32449	Phospho-2-dehydro-3-deoxyheptonate aldolase, tyrosine-inhibited OS=Saccharomyces cerevisiae (strain ATCC 204508 / S288c) OX=559292 GN=ARO4 PE=1 SV=2	1.452	0.54	0.146436	126.6	87.1	84480.8	79804.2	54220.9	56041.2	53094.7	54944.6	76635.3	69405.2	499.7	43164.5	50838.2	52979
High	Master Protein	P0CX43	60S ribosomal protein L1-A OS=Saccharomyces cerevisiae (strain ATCC 204508 / S288c) OX=559292 GN=RPL1A PE=1 SV=1	0.675	-0.57	0.0112496	82	121.5	131952	134238	169718	188119	212439	198843	119698	116746	1564	144894	203410	191730
High	Master Protein	Q12675	Phospholipid-transporting ATPase DNF2 OS=Saccharomyces cerevisiae (strain ATCC 204508 / S288c) OX=559292 GN=DNF2 PE=1 SV=1	0.871	-0.2	0.00134259	96.1	110.4	4065	4182.3	4251.2	4803.3	4882.5	4740.5	3687.5	3637.3	39.2	3699.6	4675	4570.9
High	Master Protein	Q01852	Mitochondrial import inner membrane translocase subunit TIM44 OS=Saccharomyces cerevisiae (strain ATCC 204508 / S288c) OX=559292 GN=TIM44 PE=1 SV=1	1.065	0.09	0.182972	98.9	92.8	36053	37307.4	34273.4	34772.2	33843.3	32933.9	32704.8	32446	315.8	26782.5	32405	31755.7
High	Master Protein	P25567	RNA-binding protein SRO9 OS=Saccharomyces cerevisiae (strain ATCC 204508 / S288c) OX=559292 GN=SRO9 PE=1 SV=2	1.157	0.21	0.0236757	102.2	88.3	31480.2	30003.2	29601.2	27938.6	25929.3	25733.7	28556.7	26093.6	272.8	21519.1	24827.4	24813
High	Master Protein	P48563	Protein MON2 OS=Saccharomyces cerevisiae (strain ATCC 204508 / S288c) OX=559292 GN=MON2 PE=1 SV=1	1.076	0.11	0.0769173	104.6	97.2	8596.3	9004.4	8663.4	8049.9	8299.3	7857	7798	7831.1	79.8	6200.2	7946.5	7575.9
High	Master Protein	P54839	Hydroxymethylglutaryl-CoA synthase OS=Saccharomyces cerevisiae (strain ATCC 204508 / S288c) OX=559292 GN=ERG13 PE=1 SV=1	0.672	-0.57	0.00445903	84.6	125.8	73782.5	70205.3	91638.8	111766	109736	107974	66930.6	61057.1	844.5	86085	105072	104112
High	Master Protein	P40157	Vacuolar import and degradation protein 27 OS=Saccharomyces cerevisiae (strain ATCC 204508 / S288c) OX=559292 GN=VID27 PE=1 SV=1	1.128	0.17	0.157477	98.3	87.1	9788.9	10767.6	10651.6	9439.2	9898.3	9188.8	8879.8	9364.5	98.2	7270.3	9477.6	8860.1
High	Master Protein	Q12451	Oxysterol-binding protein homolog 2 OS=Saccharomyces cerevisiae (strain ATCC 204508 / S288c) OX=559292 GN=OSH2 PE=1 SV=1	1.136	0.18	0.00193374	108.4	95.4	12774.1	12757.1	14079.8	11135.9	11258.7	11243.7	11587.8	11094.8	129.7	8577.2	10780.2	10841.5
High	Master Protein	P23542	Aspartate aminotransferase, cytoplasmic OS=Saccharomyces cerevisiae (strain ATCC 204508 / S288c) OX=559292 GN=AAT2 PE=1 SV=3	1.103	0.14	0.864545	92	83.4	55698.8	54693.5	45513.4	49602.8	50757.6	48981	50526.2	47566.5	419.4	38205.4	48600.4	47228.7
High	Master Protein	Q03834	DNA mismatch repair protein MSH6 OS=Saccharomyces cerevisiae (strain ATCC 204508 / S288c) OX=559292 GN=MSH6 PE=1 SV=1	0.928	-0.11	0.229839	92.5	99.7	5370.9	5556	4575	6032.7	5789	5567.7	4872.1	4832	42.2	4646.6	5543	5368.5
High	Master Protein	Q08951	AP-3 complex subunit delta OS=Saccharomyces cerevisiae (strain ATCC 204508 / S288c) OX=559292 GN=APL5 PE=1 SV=1	1.036	0.05	0.279312	99.3	95.8	10693.2	10953.4	10888.8	10509.9	10585.5	9595.2	9700.1	9526.1	100.3	8095	10135.6	9252
High	Master Protein	P25039	Elongation factor G, mitochondrial OS=Saccharomyces cerevisiae (strain ATCC 204508 / S288c) OX=559292 GN=MEF1 PE=1 SV=2	1.376	0.46	0.00235952	106.8	77.6	27564.3	31130.5	24701.8	20716.3	20027.2	19533.7	25004.5	27074	227.6	15956.3	19176	18834.9
High	Master Protein	P24279	DNA replication licensing factor MCM3 OS=Saccharomyces cerevisiae (strain ATCC 204508 / S288c) OX=559292 GN=MCM3 PE=1 SV=1	1.088	0.12	0.999925	107.8	99.1	10727.5	10697.7	8591.3	10256.8	9830.2	9680.3	9731.2	9303.7	79.2	7900.1	9412.5	9334
High	Master Protein	P41807	V-type proton ATPase subunit H OS=Saccharomyces cerevisiae (strain ATCC 204508 / S288c) OX=559292 GN=VMA13 PE=1 SV=1	1.092	0.13	0.154089	97.1	89	47304.7	44081.7	49114.5	44525.4	43328.6	41055.1	42911.7	38337.6	452.6	34294.7	41487.2	39586.4
High	Master Protein	P34223	UBX domain-containing protein 1 OS=Saccharomyces cerevisiae (strain ATCC 204508 / S288c) OX=559292 GN=SHP1 PE=1 SV=1	1.267	0.34	0.776424	118.4	93.5	32527.1	33642.4	21944	25680.6	25466.2	27161.2	29506.4	29258.6	202.2	19779.9	24383.9	26189.5
High	Master Protein	P35197	ADP-ribosylation factor GTPase-activating protein GCS1 OS=Saccharomyces cerevisiae (strain ATCC 204508 / S288c) OX=559292 GN=GCS1 PE=1 SV=1	1.107	0.15	0.0464484	106.1	95.9	31308.6	32255.2	31690.2	30416.3	28639.4	28338.1	28401.1	28052.1	292	23427.5	27422.2	27324.3
High	Master Protein	P47117	Actin-related protein 3 OS=Saccharomyces cerevisiae (strain ATCC 204508 / S288c) OX=559292 GN=ARP3 PE=1 SV=1	1.3	0.38	1.61307e-05	100	77	33512.9	33236.7	32498	25572.4	25933.6	24816.3	30400.6	28905.7	299.5	19696.5	24831.5	23928.5
High	Master Protein	P38333	Essential nuclear protein 1 OS=Saccharomyces cerevisiae (strain ATCC 204508 / S288c) OX=559292 GN=ENP1 PE=1 SV=1	0.991	-0.01	0.509455	100.8	101.7	31155.8	30612.9	27992.6	30904.7	31498.9	30815.4	28262.5	26623.9	258	23803.7	30160.3	29713
High	Master Protein	P53091	DNA replication licensing factor MCM6 OS=Saccharomyces cerevisiae (strain ATCC 204508 / S288c) OX=559292 GN=MCM6 PE=1 SV=2	1.005	0.01	0.828725	106.6	106.1	16569.9	16283.3	14491.3	16283.4	16130.9	16194.8	15031.1	14161.5	133.5	12541.9	15445.4	15615.5
High	Master Protein	Q04409	Putative glucokinase-2 OS=Saccharomyces cerevisiae (strain ATCC 204508 / S288c) OX=559292 GN=EMI2 PE=1 SV=1	1.782	0.83	8.08344e-07	118.3	66.4	37500.2	39169.5	34511.2	21045.2	20737.5	21160.4	34017.7	34065.5	318	16209.6	19856.2	20403.3
High	Master Protein	P38250	Increased sodium tolerance protein 2 OS=Saccharomyces cerevisiae (strain ATCC 204508 / S288c) OX=559292 GN=IST2 PE=1 SV=2	1.06	0.08	0.0961112	101.6	95.9	19136.3	19241.7	19797.2	18268.3	18158.6	17681.7	17359.2	16734.4	182.4	14070.7	17386.8	17049.2
High	Master Protein	Q05016	NADP-dependent 3-hydroxy acid dehydrogenase OS=Saccharomyces cerevisiae (strain ATCC 204508 / S288c) OX=559292 GN=YMR226C PE=1 SV=1	1.351	0.43	0.0267661	113.9	84.3	54323.5	55858.7	43237.6	40222.9	40779.1	38922.4	49278.7	48580	398.4	30980.8	39046.1	37529.9
High	Master Protein	Q08179	Mitochondrial distribution and morphology protein 38 OS=Saccharomyces cerevisiae (strain ATCC 204508 / S288c) OX=559292 GN=MDM38 PE=1 SV=1	1.057	0.08	0.403323	92.1	87.1	23772.4	25808.4	28046.1	24416.7	24680.1	23519.2	21564.8	22445.4	258.5	18806.4	23631.2	22677.8
High	Master Protein	P06102	General negative regulator of transcription subunit 3 OS=Saccharomyces cerevisiae (strain ATCC 204508 / S288c) OX=559292 GN=NOT3 PE=1 SV=2	1.058	0.08	0.10838	106.8	101	16448	16208.3	17291.7	16007.6	15054.7	15552.7	14920.5	14096.3	159.3	12329.5	14414.9	14996.3
High	Master Protein	P42846	Protein KRI1 OS=Saccharomyces cerevisiae (strain ATCC 204508 / S288c) OX=559292 GN=KRI1 PE=1 SV=1	1.467	0.55	0.0801404	119.2	81.3	33133.6	31994.8	22908.8	20728.9	21805.6	22983.8	30056.6	27825.6	211.1	15965.9	20878.9	22161.6
High	Master Protein	P15565	tRNA (guanine(26)-N(2))-dimethyltransferase, mitochondrial OS=Saccharomyces cerevisiae (strain ATCC 204508 / S288c) OX=559292 GN=TRM1 PE=1 SV=1	0.944	-0.08	0.984749	93.8	99.5	19950.2	19770.8	27954.4	22527.2	21144.3	21066.8	18097.5	17194.5	257.6	17351.1	20245.7	20313.1
High	Master Protein	P05755	40S ribosomal protein S9-B OS=Saccharomyces cerevisiae (strain ATCC 204508 / S288c) OX=559292 GN=RPS9B PE=1 SV=4	0.781	-0.36	0.00163046	90.6	116.1	231146	207794	202304	266130	263188	274490	209681	180717	1864.3	204980	252003	264670
High	Master Protein	P32333	TATA-binding protein-associated factor MOT1 OS=Saccharomyces cerevisiae (strain ATCC 204508 / S288c) OX=559292 GN=MOT1 PE=1 SV=1	0.803	-0.32	0.69747	89.8	111.9	6015.5	6142.9	9415.6	9163.7	7646.8	7653.2	5456.8	5342.4	86.8	7058.1	7321.8	7379.4
High	Master Protein	P38431	Eukaryotic translation initiation factor 5 OS=Saccharomyces cerevisiae (strain ATCC 204508 / S288c) OX=559292 GN=TIF5 PE=1 SV=1	0.892	-0.17	0.028434	90.8	101.8	59211.4	56019	53400.2	62985.9	62832.1	60637.1	53712.6	48719.3	492.1	48513.4	60161.8	58467.8
High	Master Protein	O13516	40S ribosomal protein S9-A OS=Saccharomyces cerevisiae (strain ATCC 204508 / S288c) OX=559292 GN=RPS9A PE=1 SV=3	0.929	-0.11	0.341904	92.9	100	2285	2139.6	1965	2298.4	2302	2382.9	2072.8	1860.8	18.1	1770.3	2204.2	2297.6
High	Master Protein	P25558	Bud site selection protein 3 OS=Saccharomyces cerevisiae (strain ATCC 204508 / S288c) OX=559292 GN=BUD3 PE=1 SV=2	1.295	0.37	0.0488015	124.9	96.5	9696.8	9681.5	7869.1	7557.1	7478.5	7313.4	8796.3	8420	72.5	5820.7	7160.6	7051.8
High	Master Protein	P32492	Myosin-4 OS=Saccharomyces cerevisiae (strain ATCC 204508 / S288c) OX=559292 GN=MYO4 PE=1 SV=1	0.857	-0.22	0.952603	82.1	95.7	6213.7	6514	9159.8	7730.3	7597.4	7316.2	5636.6	5665.2	84.4	5954.1	7274.6	7054.5
High	Master Protein	P54861	Dynamin-related protein DNM1 OS=Saccharomyces cerevisiae (strain ATCC 204508 / S288c) OX=559292 GN=DNM1 PE=1 SV=1	1.156	0.21	0.0488173	101.8	88	13271.8	14571.7	15517.6	12999.7	12600.8	12382	12039.3	12672.9	143	10012.7	12065.3	11939.1
High	Master Protein	P37302	Aminopeptidase Y OS=Saccharomyces cerevisiae (strain ATCC 204508 / S288c) OX=559292 GN=APE3 PE=1 SV=1	0.842	-0.25	0.541155	82.9	98.4	38551.7	39458.6	49260	44161.6	46845.6	48075.5	34971.5	34316.8	453.9	34014.5	44854.7	46355.6
High	Master Protein	P38687	Signal recognition particle subunit SRP68 OS=Saccharomyces cerevisiae (strain ATCC 204508 / S288c) OX=559292 GN=SRP68 PE=1 SV=1	0.897	-0.16	0.995171	94.8	105.7	21111.6	21960.7	29519.7	24113.6	24569.9	24479.6	19151	19099.1	272	18572.9	23525.7	23603.9
High	Master Protein	P53252	Sphingolipid long chain base-responsive protein PIL1 OS=Saccharomyces cerevisiae (strain ATCC 204508 / S288c) OX=559292 GN=PIL1 PE=1 SV=1	1.275	0.35	0.999665	110.3	86.6	95710.1	97141.2	54404.2	74998.6	75096	86054.9	86821.8	84483.1	501.3	57766	71904.6	82976.3
High	Master Protein	Q08581	Kinetochore protein SLK19 OS=Saccharomyces cerevisiae (strain ATCC 204508 / S288c) OX=559292 GN=SLK19 PE=1 SV=1	1.039	0.06	0.926602	107.3	103.2	10274.7	11597	13684.5	10833.2	11161.7	11880.2	9320.5	10085.9	126.1	8344	10687.3	11455.2
High	Master Protein	P32660	Phospholipid-transporting ATPase DNF1 OS=Saccharomyces cerevisiae (strain ATCC 204508 / S288c) OX=559292 GN=DNF1 PE=1 SV=2	0.994	-0.01	0.655925	107.2	107.9	10505.2	10597.9	8992.2	10867.4	10571.5	10406.7	9529.6	9216.9	82.9	8370.4	10122.3	10034.4
High	Master Protein	P32337	Importin subunit beta-3 OS=Saccharomyces cerevisiae (strain ATCC 204508 / S288c) OX=559292 GN=PSE1 PE=1 SV=2	0.859	-0.22	0.00787284	91.5	106.5	22145.5	22103.5	23672	25781.7	26268.5	25048.3	20088.9	19223.3	218.1	19857.8	25152.1	24152.2
High	Master Protein	P38069	Alpha-1,2-mannosyltransferase MNN2 OS=Saccharomyces cerevisiae (strain ATCC 204508 / S288c) OX=559292 GN=MNN2 PE=1 SV=1	0.723	-0.47	7.20066e-05	84.6	117	14276	14468.9	15446.3	19496.9	20613.8	20004.6	12950.3	12583.5	142.3	15017	19737.7	19289
High	Master Protein	P36037	Protein DOA1 OS=Saccharomyces cerevisiae (strain ATCC 204508 / S288c) OX=559292 GN=DOA1 PE=1 SV=1	0.925	-0.11	0.181785	100.7	108.9	16249.2	17379.6	18421.9	17975.6	18792.2	19273.6	14740.2	15115	169.8	13845.3	17993.5	18584.1
High	Master Protein	P05737	60S ribosomal protein L7-A OS=Saccharomyces cerevisiae (strain ATCC 204508 / S288c) OX=559292 GN=RPL7A PE=1 SV=3	0.656	-0.61	9.27581e-05	83.7	127.7	177710	175727	190137	270934	282398	270514	161206	152829	1752.1	208681	270397	260837
High	Master Protein	P00890	Citrate synthase, mitochondrial OS=Saccharomyces cerevisiae (strain ATCC 204508 / S288c) OX=559292 GN=CIT1 PE=1 SV=2	1.553	0.63	6.3022e-05	99.3	63.9	44289.7	51993.8	50466.2	33091.8	32497.8	32186.7	40176.7	45218.7	465.1	25488.2	31116.7	31035.2
High	Master Protein	P31412	V-type proton ATPase subunit C OS=Saccharomyces cerevisiae (strain ATCC 204508 / S288c) OX=559292 GN=VMA5 PE=1 SV=4	0.633	-0.66	0.640724	71.2	112.4	32612	32675.2	66914.5	51613.7	53098	50425.5	29583.4	28417.4	616.6	39754.3	50841.5	48621.6
High	Master Protein	P16547	Mitochondrial outer membrane protein OM45 OS=Saccharomyces cerevisiae (strain ATCC 204508 / S288c) OX=559292 GN=OM45 PE=1 SV=2	1.904	0.93	0.000611046	89.5	47	12607.1	14547	10264.6	6620.7	6675.1	6502	11436.3	12651.5	94.6	5099.4	6391.5	6269.4
High	Master Protein	P13586	Calcium-transporting ATPase 1 OS=Saccharomyces cerevisiae (strain ATCC 204508 / S288c) OX=559292 GN=PMR1 PE=1 SV=1	0.897	-0.16	0.892299	92.8	103.5	17128.7	16689.5	21516.3	19090.9	19372.8	19020.5	15538	14514.8	198.3	14704.3	18549.5	18340
High	Master Protein	P53145	Large subunit GTPase 1 OS=Saccharomyces cerevisiae (strain ATCC 204508 / S288c) OX=559292 GN=LSG1 PE=1 SV=1	0.761	-0.39	3.51778e-05	86.6	113.8	15878.5	16247.1	15017.4	20511.1	21087.3	20863.2	14404	14130	138.4	15798.2	20191.1	20116.8
High	Master Protein	P32419	Malate dehydrogenase, peroxisomal OS=Saccharomyces cerevisiae (strain ATCC 204508 / S288c) OX=559292 GN=MDH3 PE=1 SV=3	1.078	0.11	0.393752	93.3	86.5	26913.9	27640.2	56902.1	25832.1	25639.6	24802.5	24414.5	24038.5	524.4	19896.6	24549.9	23915.2
High	Master Protein	P25582	27S pre-rRNA (guanosine(2922)-2'-O)-methyltransferase OS=Saccharomyces cerevisiae (strain ATCC 204508 / S288c) OX=559292 GN=SPB1 PE=1 SV=2	1.218	0.28	0.00955437	115.3	94.6	29895	27907.4	25464.1	22911.5	22274.2	23235	27118.7	24270.8	234.7	17647.1	21327.6	22403.8
High	Master Protein	P38682	ADP-ribosylation factor GTPase-activating protein GLO3 OS=Saccharomyces cerevisiae (strain ATCC 204508 / S288c) OX=559292 GN=GLO3 PE=1 SV=1	1.11	0.15	0.883275	105.6	95.1	24874.9	25367	20017.4	21693.9	22839.4	22400.9	22564.9	22061.5	184.5	16709.2	21868.8	21599.5
High	Master Protein	P47912	Long-chain-fatty-acid--CoA ligase 4 OS=Saccharomyces cerevisiae (strain ATCC 204508 / S288c) OX=559292 GN=FAA4 PE=1 SV=1	0.918	-0.12	0.595355	97.5	106.2	34075.3	31484.6	38484.3	35897.6	37731	37111.1	30910.8	27382	354.6	27649.3	36127.5	35783.5
High	Master Protein	P01123	GTP-binding protein YPT1 OS=Saccharomyces cerevisiae (strain ATCC 204508 / S288c) OX=559292 GN=YPT1 PE=1 SV=2	1.21	0.28	0.125975	96.7	79.9	76834	66738.2	56125.9	52757	55136.6	55869.5	69698.7	58041.8	517.2	40634.9	52793.4	53870.8
High	Master Protein	P14772	Bile pigment transporter 1 OS=Saccharomyces cerevisiae (strain ATCC 204508 / S288c) OX=559292 GN=BPT1 PE=1 SV=2	1.051	0.07	0.415109	102.3	97.4	8280.9	8423.4	8384.5	8235.7	7976.6	7758.6	7511.8	7325.8	77.3	6343.4	7637.6	7481.1
High	Master Protein	P10869	Aspartokinase OS=Saccharomyces cerevisiae (strain ATCC 204508 / S288c) OX=559292 GN=HOM3 PE=1 SV=2	1.528	0.61	0.0471125	130.3	85.2	49772.2	49309	34775.7	32266.7	33312.3	32164.8	45150.1	42883.7	320.5	24852.7	31896.6	31014.1
High	Master Protein	Q07844	Ribosome biogenesis ATPase RIX7 OS=Saccharomyces cerevisiae (strain ATCC 204508 / S288c) OX=559292 GN=RIX7 PE=1 SV=1	1.037	0.05	0.940893	97.3	93.9	15634.9	15789	13167.3	15472.6	15065.3	15083.7	14182.9	13731.6	121.3	11917.4	14425	14544
High	Master Protein	Q12213	60S ribosomal protein L7-B OS=Saccharomyces cerevisiae (strain ATCC 204508 / S288c) OX=559292 GN=RPL7B PE=1 SV=3	0.863	-0.21	0.534014	84.6	98	6349.5	5888.5	4224.2	5653.1	7217.9	6822.7	5759.8	5121.2	38.9	4354.2	6911.1	6578.6
High	Master Protein	P00899	Anthranilate synthase component 1 OS=Saccharomyces cerevisiae (strain ATCC 204508 / S288c) OX=559292 GN=TRP2 PE=1 SV=4	1.267	0.34	0.00502366	111.4	87.9	49781.2	48873	42883.3	38659.3	38560	37476.3	45158.2	42504.5	395.2	29776.4	36921.3	36135.6
High	Master Protein	P32377	Diphosphomevalonate decarboxylase OS=Saccharomyces cerevisiae (strain ATCC 204508 / S288c) OX=559292 GN=MVD1 PE=1 SV=2	0.781	-0.36	0.0262141	84.4	108	31145.1	32020.8	37594.5	43338	40988.2	40004.9	28252.7	27848.2	346.4	33380.1	39246.3	38573.7
High	Master Protein	P08678	Adenylate cyclase OS=Saccharomyces cerevisiae (strain ATCC 204508 / S288c) OX=559292 GN=CYR1 PE=1 SV=2	1.219	0.29	0.625513	115.3	94.6	8178.1	8644.3	5844.2	6711.1	6735.5	6403.9	7418.6	7517.9	53.9	5169.1	6449.3	6174.8
High	Master Protein	P31383	Protein phosphatase PP2A regulatory subunit A OS=Saccharomyces cerevisiae (strain ATCC 204508 / S288c) OX=559292 GN=TPD3 PE=1 SV=3	1.203	0.27	0.0121753	87.9	73	31964.9	30063.2	37324.9	26729.1	26576.7	25513.5	28996.4	26145.8	344	20587.5	25447.3	24600.8
High	Master Protein	P31373	Cystathionine gamma-lyase OS=Saccharomyces cerevisiae (strain ATCC 204508 / S288c) OX=559292 GN=CYS3 PE=1 SV=2	0.912	-0.13	0.0703004	95.4	104.7	89056.9	81541	92157.9	97665	94350	101724	80786.5	70915.7	849.3	75224.2	90340.3	98085.1
High	Master Protein	P40341	Mitochondrial respiratory chain complexes assembly protein YTA12 OS=Saccharomyces cerevisiae (strain ATCC 204508 / S288c) OX=559292 GN=YTA12 PE=1 SV=2	1.238	0.31	2.82025e-05	106.9	86.3	23234.5	24408	22668.3	18773.3	19126.3	18466.6	21076.8	21227.5	208.9	14459.7	18313.4	17806
High	Master Protein	P42935	Elongator complex protein 2 OS=Saccharomyces cerevisiae (strain ATCC 204508 / S288c) OX=559292 GN=ELP2 PE=1 SV=1	1.105	0.14	0.0215563	111.2	100.6	25590.2	25530	24316.1	23097	22871.9	23599.2	23213.7	22203.3	224.1	17789.9	21899.9	22754.9
High	Master Protein	P53552	THO complex subunit 2 OS=Saccharomyces cerevisiae (strain ATCC 204508 / S288c) OX=559292 GN=THO2 PE=1 SV=1	0.986	-0.02	0.830101	105.5	107	9079.4	9513.5	13031.2	9649.5	9832.9	9483.8	8236.2	8273.8	120.1	7432.3	9415	9144.5
High	Master Protein	P33298	26S proteasome regulatory subunit 6B homolog OS=Saccharomyces cerevisiae (strain ATCC 204508 / S288c) OX=559292 GN=RPT3 PE=1 SV=2	1.212	0.28	0.00067194	103.5	85.4	24007.5	23890.5	26792.9	19675.9	20290.8	19805.1	21778	20777.4	246.9	15154.9	19428.4	19096.5
High	Master Protein	Q02875	SMY2 homolog 2 OS=Saccharomyces cerevisiae (strain ATCC 204508 / S288c) OX=559292 GN=SYH1 PE=1 SV=1	1.13	0.18	0.796502	115	101.8	8665.4	8614.9	6847	7623	7655.2	7357.6	7860.6	7492.3	63.1	5871.5	7329.9	7094.3
High	Master Protein	P05317	60S acidic ribosomal protein P0 OS=Saccharomyces cerevisiae (strain ATCC 204508 / S288c) OX=559292 GN=RPP0 PE=1 SV=2	0.49	-1.03	0.000125411	78	159.3	264087	299547	216675	539414	502034	551618	239562	260514	1996.7	415471	480698	531884
High	Master Protein	P53953	SED5-binding protein 2 OS=Saccharomyces cerevisiae (strain ATCC 204508 / S288c) OX=559292 GN=SFB2 PE=1 SV=1	0.992	-0.01	0.843423	99.4	100.2	7971.7	8409.7	5770	7456.1	8083.5	8037.4	7231.4	7313.9	53.2	5742.9	7740	7749.9
High	Master Protein	P00942	Triosephosphate isomerase OS=Saccharomyces cerevisiae (strain ATCC 204508 / S288c) OX=559292 GN=TPI1 PE=1 SV=2	0.962	-0.06	0.468551	105.2	109.3	58928.3	59564.2	42966.9	61225.9	59221	67287	53455.8	51802.6	395.9	47157.9	56704.2	64879.8
High	Master Protein	Q05946	U3 small nucleolar RNA-associated protein 13 OS=Saccharomyces cerevisiae (strain ATCC 204508 / S288c) OX=559292 GN=UTP13 PE=1 SV=1	1.051	0.07	0.216863	102.3	97.3	18214.8	17986.1	19896.4	17138.9	17330.8	18027.4	16523.3	15642.4	183.3	13200.8	16594.2	17382.5
High	Master Protein	P38013	Peroxiredoxin AHP1 OS=Saccharomyces cerevisiae (strain ATCC 204508 / S288c) OX=559292 GN=AHP1 PE=1 SV=4	1.003	0	0.94252	97	96.7	126948	158639	108870	128077	113131	126577	115159	137968	1003.3	98648.6	108323	122048
High	Master Protein	P38688	Signal recognition particle subunit SRP72 OS=Saccharomyces cerevisiae (strain ATCC 204508 / S288c) OX=559292 GN=SRP72 PE=1 SV=2	1.068	0.1	0.999982	104.4	97.7	29371.4	28786.3	23864.2	28879.6	26942.2	26093.2	26643.8	25035.3	219.9	22243.9	25797.2	25159.7
High	Master Protein	P40563	Altered inheritance of mitochondria protein 21 OS=Saccharomyces cerevisiae (strain ATCC 204508 / S288c) OX=559292 GN=AIM21 PE=1 SV=1	1.688	0.76	0.0121378	132.7	78.6	12169.7	12344.4	8579.8	7209.1	6515.3	7427	11039.5	10735.8	79.1	5552.6	6238.4	7161.3
High	Master Protein	P52918	Protein MSN5 OS=Saccharomyces cerevisiae (strain ATCC 204508 / S288c) OX=559292 GN=MSN5 PE=1 SV=1	1.097	0.13	0.000272172	106.3	96.9	12405	12899.2	12385.9	11308.5	11447.4	11117.6	11253	11218.4	114.1	8710.1	10960.9	10719.8
High	Master Protein	P53115	Chromatin-remodeling ATPase INO80 OS=Saccharomyces cerevisiae (strain ATCC 204508 / S288c) OX=559292 GN=INO80 PE=1 SV=1	1.025	0.03	0.95188	99.8	97.4	7349.7	7834.5	5967.4	7446.2	7173.8	7130.1	6667.1	6813.6	55	5735.3	6868.9	6875.1
High	Master Protein	P38779	Proteasome-interacting protein CIC1 OS=Saccharomyces cerevisiae (strain ATCC 204508 / S288c) OX=559292 GN=CIC1 PE=1 SV=1	1.047	0.07	0.998431	100.7	96.2	27765	26477.2	23511.9	26588.4	25198.1	25297.7	25186.5	23027.1	216.7	20479.1	24127.3	24392.7
High	Master Protein	Q08220	Glutathione synthetase OS=Saccharomyces cerevisiae (strain ATCC 204508 / S288c) OX=559292 GN=GSH2 PE=1 SV=1	1.108	0.15	0.013895	114.7	103.5	24844.1	27299.9	25344.3	23501.5	22140.3	22882.4	22536.9	23742.6	233.6	18101.5	21199.4	22063.8
High	Master Protein	P15873	Proliferating cell nuclear antigen OS=Saccharomyces cerevisiae (strain ATCC 204508 / S288c) OX=559292 GN=POL30 PE=1 SV=1	1.131	0.18	0.010766	104.3	92.2	61147.4	63172.9	66750.3	57028.7	52608.3	55851.3	55468.8	54941.1	615.1	43925	50372.5	53853.2
High	Master Protein	P0CX83	60S ribosomal protein L19-B OS=Saccharomyces cerevisiae (strain ATCC 204508 / S288c) OX=559292 GN=RPL19B PE=1 SV=1	0.838	-0.25	0.0302625	96.6	115.2	110733	104434	91715.6	124602	122417	127061	100450	90825.5	845.2	95971.9	117215	122516
High	Master Protein	Q06505	Transcription factor SPN1 OS=Saccharomyces cerevisiae (strain ATCC 204508 / S288c) OX=559292 GN=SPN1 PE=1 SV=1	1.056	0.08	0.999983	102.9	97.4	15244.8	15191.5	12811.3	14628	14038	14379.1	13829.1	13211.9	118.1	11266.9	13441.4	13864.6
High	Master Protein	Q04894	NADP-dependent alcohol dehydrogenase 6 OS=Saccharomyces cerevisiae (strain ATCC 204508 / S288c) OX=559292 GN=ADH6 PE=1 SV=1	1.097	0.13	0.999267	108.8	99.2	31553.2	38145.2	38920.2	38562	34172.9	34782.4	28622.9	33174.6	358.7	29701.5	32720.6	33538
High	Master Protein	P27616	Phosphoribosylaminoimidazole-succinocarboxamide synthase OS=Saccharomyces cerevisiae (strain ATCC 204508 / S288c) OX=559292 GN=ADE1 PE=1 SV=2	1.671	0.74	0.00341396	108.1	64.7	38170.4	36528.1	27856.8	22782.4	21856.7	21586.3	34625.7	31768.3	256.7	17547.7	20927.8	20814
High	Master Protein	Q03921	Protein dopey OS=Saccharomyces cerevisiae (strain ATCC 204508 / S288c) OX=559292 GN=DOP1 PE=1 SV=1	1.002	0	0.999756	103.9	103.6	12254.7	12521.1	11965.9	12967.8	12226.7	11688.5	11116.6	10889.5	110.3	9988.1	11707.1	11270.3
High	Master Protein	P21243	Proteasome subunit alpha type-1 OS=Saccharomyces cerevisiae (strain ATCC 204508 / S288c) OX=559292 GN=SCL1 PE=1 SV=1	1.1	0.14	0.0611177	97	88.1	29645.7	30441.4	32986.8	28626.1	27664.2	26740.4	26892.6	26474.7	304	22048.6	26488.5	25783.7
High	Master Protein	P40340	Tat-binding homolog 7 OS=Saccharomyces cerevisiae (strain ATCC 204508 / S288c) OX=559292 GN=YTA7 PE=1 SV=2	1.1	0.14	0.0865783	105.4	95.8	10071.5	10737.7	11929.8	9763	9827.4	9518.5	9136.2	9338.5	109.9	7519.7	9409.8	9178
High	Master Protein	Q01939	26S proteasome regulatory subunit 8 homolog OS=Saccharomyces cerevisiae (strain ATCC 204508 / S288c) OX=559292 GN=RPT6 PE=1 SV=4	1.084	0.12	0.57599	98.6	90.9	41523.1	38899.1	33990.6	35869.1	36004.8	35407.1	37667	33830.3	313.2	27627.4	34474.6	34140.5
High	Master Protein	Q04636	FACT complex subunit POB3 OS=Saccharomyces cerevisiae (strain ATCC 204508 / S288c) OX=559292 GN=POB3 PE=1 SV=1	1.125	0.17	0.00959562	104.1	92.5	27791.3	27877.4	26017.3	24702.9	24743.2	24647.5	25210.5	24244.8	239.8	19026.8	23691.7	23765.7
High	Master Protein	Q12265	Ribose-phosphate pyrophosphokinase 5 OS=Saccharomyces cerevisiae (strain ATCC 204508 / S288c) OX=559292 GN=PRS5 PE=1 SV=1	0.998	0	0.731049	94.9	95.2	25102	25539.1	29885.8	25497.5	25601.1	25677.7	22770.9	22211.2	275.4	19638.9	24513.1	24759.1
High	Master Protein	P34237	Protein CASP OS=Saccharomyces cerevisiae (strain ATCC 204508 / S288c) OX=559292 GN=COY1 PE=1 SV=2	1.181	0.24	0.18478	111	94	16392.7	16569.5	13927.2	13880.8	14381.7	13878.1	14870.4	14410.4	128.3	10691.4	13770.5	13381.6
High	Master Protein	P52593	Nucleoporin NUP188 OS=Saccharomyces cerevisiae (strain ATCC 204508 / S288c) OX=559292 GN=NUP188 PE=1 SV=1	0.99	-0.01	0.987625	98.6	99.6	15167.4	15889.9	16809.6	16053.4	16537.3	15760.3	13758.9	13819.4	154.9	12364.8	15834.5	15196.5
High	Master Protein	Q02979	Glycerophosphocholine phosphodiesterase GDE1 OS=Saccharomyces cerevisiae (strain ATCC 204508 / S288c) OX=559292 GN=GDE1 PE=1 SV=1	1.457	0.54	0.00384288	103	70.7	8167.9	9641.5	9753.8	7067.1	6616.6	6567.6	7409.4	8385.2	89.9	5443.3	6335.4	6332.6
High	Master Protein	P02992	Elongation factor Tu, mitochondrial OS=Saccharomyces cerevisiae (strain ATCC 204508 / S288c) OX=559292 GN=TUF1 PE=1 SV=1	0.896	-0.16	0.718528	89.1	99.4	25078.1	27887.9	32965.2	31412.7	31124.2	29235.8	22749.2	24254	303.8	24194.9	29801.5	28189.9
High	Master Protein	Q00764	Alpha,alpha-trehalose-phosphate synthase [UDP-forming] 56 kDa subunit OS=Saccharomyces cerevisiae (strain ATCC 204508 / S288c) OX=559292 GN=TPS1 PE=1 SV=2	1.331	0.41	0.000438781	100.7	75.7	34143.1	34957.6	31001.6	26097.1	25645.8	24662.5	30972.4	30402.4	285.7	20100.7	24555.9	23780.2
High	Master Protein	P07283	Phosphomannomutase OS=Saccharomyces cerevisiae (strain ATCC 204508 / S288c) OX=559292 GN=SEC53 PE=1 SV=1	0.555	-0.85	0.000788831	76.3	137.5	64593.7	65640.8	82689.8	118371	110347	128868	58595.1	57087.4	762	91172.3	105658	124258
High	Master Protein	P22768	Argininosuccinate synthase OS=Saccharomyces cerevisiae (strain ATCC 204508 / S288c) OX=559292 GN=ARG1 PE=1 SV=3	3.154	1.66	0.109333	162.7	51.6	83433.4	82533.7	26933.5	26818.6	25820.4	26167.1	75685.2	71779	248.2	20656.4	24723	25231
High	Master Protein	Q00055	Glycerol-3-phosphate dehydrogenase [NAD(+)] 1 OS=Saccharomyces cerevisiae (strain ATCC 204508 / S288c) OX=559292 GN=GPD1 PE=1 SV=4	2.184	1.13	0.0631233	135.4	62	75372.1	77415.4	37612.7	33248.3	34512.9	35289.9	68372.6	67327.7	346.6	25608.7	33046.1	34027.4
High	Master Protein	P06101	Hsp90 co-chaperone Cdc37 OS=Saccharomyces cerevisiae (strain ATCC 204508 / S288c) OX=559292 GN=CDC37 PE=1 SV=2	1.047	0.07	0.0614906	105.8	101	37848.1	38839.3	36881.2	35320.1	36136.1	36683	34333.3	33778.2	339.9	27204.5	34600.4	35370.7
High	Master Protein	P54783	D-arabinono-1,4-lactone oxidase OS=Saccharomyces cerevisiae (strain ATCC 204508 / S288c) OX=559292 GN=ALO1 PE=1 SV=1	0.982	-0.03	0.999078	97.3	99.2	28185.7	29234.4	32465.8	29784.9	29987.4	29556.8	25568.2	25424.9	299.2	22941.2	28713	28499.4
High	Master Protein	Q12220	U3 small nucleolar RNA-associated protein 12 OS=Saccharomyces cerevisiae (strain ATCC 204508 / S288c) OX=559292 GN=DIP2 PE=1 SV=1	0.983	-0.02	0.963296	99.6	101.3	18709	18875.2	18253.8	19538.8	19024.8	17991.3	16971.5	16415.6	168.2	15049.3	18216.3	17347.7
High	Master Protein	P26785	60S ribosomal protein L16-B OS=Saccharomyces cerevisiae (strain ATCC 204508 / S288c) OX=559292 GN=RPL16B PE=1 SV=3	0.743	-0.43	0.000408535	88.7	119.3	85867.9	82075.7	83166.9	106130	111868	113088	77893.7	71380.7	766.4	81743.9	107114	109042
High	Master Protein	P38077	ATP synthase subunit gamma, mitochondrial OS=Saccharomyces cerevisiae (strain ATCC 204508 / S288c) OX=559292 GN=ATP3 PE=1 SV=1	1.186	0.25	0.00778418	98.9	83.4	38817.1	41693.7	36522.6	34027.4	32368.8	32737.1	35212.2	36260.7	336.6	26208.8	30993.1	31565.9
High	Master Protein	P12753	DNA repair protein RAD50 OS=Saccharomyces cerevisiae (strain ATCC 204508 / S288c) OX=559292 GN=RAD50 PE=1 SV=1	1.464	0.55	0.00147909	122.6	83.8	8508.6	9308.5	11189.5	6357.1	6274.2	6377.4	7718.5	8095.6	103.1	4896.4	6007.6	6149.2
High	Master Protein	P21147	Acyl-CoA desaturase 1 OS=Saccharomyces cerevisiae (strain ATCC 204508 / S288c) OX=559292 GN=OLE1 PE=1 SV=2	0.776	-0.37	0.860835	75.6	97.4	25431.8	25965	41942.2	33451.6	33967.7	32618.4	23070	22581.6	386.5	25765.3	32524.2	31451.4
High	Master Protein	P32843	Mitochondrial escape protein 2 OS=Saccharomyces cerevisiae (strain ATCC 204508 / S288c) OX=559292 GN=YME2 PE=1 SV=1	1.286	0.36	0.00529022	112	87.2	12679.7	14053.8	15928.5	10943.6	10932.2	10457.8	11502.2	12222.5	146.8	8429.1	10467.6	10083.7
High	Master Protein	P35719	Uncharacterized protein MRP8 OS=Saccharomyces cerevisiae (strain ATCC 204508 / S288c) OX=559292 GN=MRP8 PE=1 SV=1	1.517	0.6	0.000493635	111.7	73.6	59918.1	68925.5	54552	39491.4	37069.5	40902.9	54353.7	59944.1	502.7	30417.3	35494.1	39439.6
High	Master Protein	P40032	Prolyl 3,4-dihydroxylase TPA1 OS=Saccharomyces cerevisiae (strain ATCC 204508 / S288c) OX=559292 GN=TPA1 PE=1 SV=1	0.898	-0.15	0.0652087	97.2	108.2	33288.3	30073.4	35473	37295.6	37061.9	36581.4	30197	26154.6	326.9	28726.1	35486.9	35272.7
High	Master Protein	P32608	Retrograde regulation protein 2 OS=Saccharomyces cerevisiae (strain ATCC 204508 / S288c) OX=559292 GN=RTG2 PE=1 SV=2	1.346	0.43	0.160678	110.9	82.4	20676.3	20503.4	15163.2	15874.9	14806.3	15233.1	18756.2	17831.7	139.7	12227.3	14177.1	14688.1
High	Master Protein	P47166	Protein SGM1 OS=Saccharomyces cerevisiae (strain ATCC 204508 / S288c) OX=559292 GN=SGM1 PE=1 SV=1	1.175	0.23	0.0276033	117.4	99.9	13496.6	14374.7	12398.1	11487.3	10485.5	11808.1	12243.2	12501.6	114.3	8847.8	10039.9	11385.6
High	Master Protein	P26784	60S ribosomal protein L16-A OS=Saccharomyces cerevisiae (strain ATCC 204508 / S288c) OX=559292 GN=RPL16A PE=1 SV=3	0.943	-0.08	0.661201	100.9	107	204775	190897	184044	197269	202416	216180	185758	166022	1696	151942	193814	208446
High	Master Protein	P29509	Thioredoxin reductase 1 OS=Saccharomyces cerevisiae (strain ATCC 204508 / S288c) OX=559292 GN=TRR1 PE=1 SV=3	0.906	-0.14	0.229586	89	98.3	45640	44490.8	50296.7	50402.5	50899.3	48945.3	41401.6	38693.4	463.5	38821.4	48736.2	47194.3
High	Master Protein	P38129	Transcription initiation factor TFIID subunit 5 OS=Saccharomyces cerevisiae (strain ATCC 204508 / S288c) OX=559292 GN=TAF5 PE=1 SV=1	1.095	0.13	0.085407	103.6	94.7	11139.5	11714.2	12648.3	10487.7	11102.3	10700.3	10105	10187.8	116.6	8077.9	10630.5	10317.5
High	Master Protein	Q08924	Regulator of Ty1 transposition protein 10 OS=Saccharomyces cerevisiae (strain ATCC 204508 / S288c) OX=559292 GN=RTT10 PE=1 SV=1	0.895	-0.16	0.0164074	99.8	111.5	15158.8	15403.3	15533.3	17453.4	17217.2	16784.4	13751.1	13396.1	143.1	13443.1	16485.5	16183.9
High	Master Protein	P32380	Spindle pole body component 110 OS=Saccharomyces cerevisiae (strain ATCC 204508 / S288c) OX=559292 GN=SPC110 PE=1 SV=1	1.05	0.07	0.113937	102.3	97.5	7218.6	7194.2	7552.5	6936.1	6875.4	6826.6	6548.3	6256.8	69.6	5342.4	6583.2	6582.4
High	Master Protein	P15274	AMP deaminase OS=Saccharomyces cerevisiae (strain ATCC 204508 / S288c) OX=559292 GN=AMD1 PE=1 SV=2	1.019	0.03	0.991213	100.4	98.5	15603.3	16831.1	17530.3	16339.5	16638.8	16511.6	14154.3	14637.9	161.5	12585.2	15931.7	15920.9
High	Master Protein	P35191	DnaJ homolog 1, mitochondrial OS=Saccharomyces cerevisiae (strain ATCC 204508 / S288c) OX=559292 GN=MDJ1 PE=1 SV=1	1.415	0.5	0.0462892	116.7	82.4	15555.4	16513	12127.7	11831.9	10992.2	10843.7	14110.9	14361.3	111.8	9113.2	10525.1	10455.8
High	Master Protein	P08524	Farnesyl pyrophosphate synthase OS=Saccharomyces cerevisiae (strain ATCC 204508 / S288c) OX=559292 GN=ERG20 PE=1 SV=2	1.252	0.32	0.000282433	114.6	91.6	100644	92502.3	89649.1	72010.9	73907.6	74092.6	91297.9	80448.7	826.1	55464.7	70766.6	71442
High	Master Protein	Q06631	Protein BFR2 OS=Saccharomyces cerevisiae (strain ATCC 204508 / S288c) OX=559292 GN=BFR2 PE=1 SV=1	1.184	0.24	0.0479766	117.5	99.2	26308.7	25202.4	23132.6	21289.7	20992.3	22995.8	23865.5	21918.4	213.2	16397.9	20100.1	22173.2
High	Master Protein	Q04947	Reticulon-like protein 1 OS=Saccharomyces cerevisiae (strain ATCC 204508 / S288c) OX=559292 GN=RTN1 PE=1 SV=1	0.868	-0.2	0.0489928	90.2	103.9	57455.3	52733.8	52154	59912	65311.6	60743	52119.6	45862.2	480.6	46145.9	62536	58569.9
High	Master Protein	P38115	D-arabinose dehydrogenase [NAD(P)+] heavy chain OS=Saccharomyces cerevisiae (strain ATCC 204508 / S288c) OX=559292 GN=ARA1 PE=1 SV=1	1.488	0.57	0.0218495	106	71.2	29730.2	31466.8	22533.8	20349.5	18923.9	19980.9	26969.2	27366.4	207.7	15673.8	18119.7	19266.1
High	Master Protein	P46682	AP-3 complex subunit beta OS=Saccharomyces cerevisiae (strain ATCC 204508 / S288c) OX=559292 GN=APL6 PE=1 SV=2	1.188	0.25	0.794738	106.2	89.4	10942.3	10987	8093	9442.5	9209.6	8957.6	9926.2	9555.3	74.6	7272.9	8818.2	8637.2
High	Master Protein	P30771	ATP-dependent helicase NAM7 OS=Saccharomyces cerevisiae (strain ATCC 204508 / S288c) OX=559292 GN=NAM7 PE=1 SV=1	1.194	0.26	0.732308	121.4	101.7	19121.7	18908.9	14294.5	16489.1	15838.4	15626.2	17345.9	16444.9	131.7	12700.3	15165.3	15067.2
High	Master Protein	P33327	NAD-specific glutamate dehydrogenase OS=Saccharomyces cerevisiae (strain ATCC 204508 / S288c) OX=559292 GN=GDH2 PE=1 SV=1	1.7	0.77	0.0600893	111.8	65.8	17909.9	20533.1	11502.3	10333.5	10537.6	10824.6	16246.7	17857.5	106	7959.1	10089.8	10437.4
High	Master Protein	Q04371	Damage-control phosphatase YMR027W OS=Saccharomyces cerevisiae (strain ATCC 204508 / S288c) OX=559292 GN=YMR027W PE=1 SV=1	1.213	0.28	0.0223975	104.7	86.3	29470.4	32125.1	26306.7	24965.6	24292.5	23883.3	26733.6	27939	242.4	19229.2	23260.1	23028.8
High	Master Protein	Q12532	Ribosome quality control complex subunit 2 OS=Saccharomyces cerevisiae (strain ATCC 204508 / S288c) OX=559292 GN=RQC2 PE=1 SV=1	0.98	-0.03	0.720452	98.1	100.1	13506.8	13596.5	25674.6	13870.7	13525.8	14934.3	12252.5	11824.8	236.6	10683.6	12951	14400
High	Master Protein	P25443	40S ribosomal protein S2 OS=Saccharomyces cerevisiae (strain ATCC 204508 / S288c) OX=559292 GN=RPS2 PE=1 SV=3	0.768	-0.38	3.23743e-05	92.1	119.9	130258	119368	130774	172100	169513	165941	118162	103814	1205.1	132556	162309	160005
High	Master Protein	Q12458	Putative reductase 1 OS=Saccharomyces cerevisiae (strain ATCC 204508 / S288c) OX=559292 GN=YPR1 PE=1 SV=1	0.991	-0.01	0.993686	97.1	98	37787.7	36959.5	41409.9	41655.2	38117.8	37621.8	34278.5	32143.5	381.6	32084	36497.8	36275.8
High	Master Protein	Q07657	Seventh homolog of septin 1 OS=Saccharomyces cerevisiae (strain ATCC 204508 / S288c) OX=559292 GN=SHS1 PE=1 SV=1	1.092	0.13	0.0412843	101	92.5	19376	20338.4	20257.4	18552.7	18929.6	18158.6	17576.6	17688.2	186.7	14289.8	18125.1	17509
High	Master Protein	P38795	Glutamine-dependent NAD(+) synthetase OS=Saccharomyces cerevisiae (strain ATCC 204508 / S288c) OX=559292 GN=QNS1 PE=1 SV=1	1.088	0.12	0.135492	106.2	97.6	13735.4	14066.8	16331.7	13343.3	12924.2	12426.7	12459.8	12233.8	150.5	10277.3	12375	11982.1
High	Master Protein	P25847	DNA mismatch repair protein MSH2 OS=Saccharomyces cerevisiae (strain ATCC 204508 / S288c) OX=559292 GN=MSH2 PE=1 SV=2	1.001	0	0.765695	97.1	96.9	14002.3	14515.5	13993.2	13986.8	14040.6	13368.5	12701.9	12624	128.9	10773	13443.9	12890.2
High	Master Protein	P53598	Succinate--CoA ligase [ADP-forming] subunit alpha, mitochondrial OS=Saccharomyces cerevisiae (strain ATCC 204508 / S288c) OX=559292 GN=LSC1 PE=1 SV=1	1.338	0.42	0.440197	102	76.2	36480.3	38244.5	24696.5	27256.1	28478	26677.9	33092.5	33261	227.6	20993.4	27267.7	25723.5
High	Master Protein	P14843	Phospho-2-dehydro-3-deoxyheptonate aldolase, phenylalanine-inhibited OS=Saccharomyces cerevisiae (strain ATCC 204508 / S288c) OX=559292 GN=ARO3 PE=1 SV=1	1.314	0.39	3.12778e-05	108.6	82.6	32768.1	31472	29994.3	24654.4	23827.9	23949.5	29725	27371	276.4	18989.5	22815.2	23092.7
High	Master Protein	P00498	ATP phosphoribosyltransferase OS=Saccharomyces cerevisiae (strain ATCC 204508 / S288c) OX=559292 GN=HIS1 PE=1 SV=1	1.288	0.37	0.31383	107.5	83.5	57767.7	53980.6	39116.3	42209.1	41912.2	41108.1	52403	46946.6	360.5	32510.6	40131	39637.4
High	Master Protein	P23301	Eukaryotic translation initiation factor 5A-1 OS=Saccharomyces cerevisiae (strain ATCC 204508 / S288c) OX=559292 GN=HYP2 PE=1 SV=3	0.74	-0.43	0.0572789	91.9	124.1	151572	161616	206644	218362	209565	250350	137496	140556	1904.3	168188	200659	241394
High	Master Protein	P32501	Translation initiation factor eIF-2B subunit epsilon OS=Saccharomyces cerevisiae (strain ATCC 204508 / S288c) OX=559292 GN=GCD6 PE=1 SV=1	1.149	0.2	0.00332176	109.2	95.1	24272.5	24348.4	22712.2	20687.7	21371.2	21124.2	22018.4	21175.7	209.3	15934.2	20462.9	20368.5
High	Master Protein	Q03761	Transcription initiation factor TFIID subunit 12 OS=Saccharomyces cerevisiae (strain ATCC 204508 / S288c) OX=559292 GN=TAF12 PE=1 SV=1	1.202	0.27	0.000158232	110.7	92.1	12427.6	13079.7	13028.4	10775.5	10841.9	11181.2	11273.5	11375.3	120.1	8299.6	10381.2	10781.2
High	Master Protein	P16550	Protein APA1 OS=Saccharomyces cerevisiae (strain ATCC 204508 / S288c) OX=559292 GN=APA1 PE=1 SV=4	1.365	0.45	0.264273	131.8	96.6	104048	99056.5	67129.1	66081	74198.5	72570.3	94385.1	86148.8	618.6	50897.4	71045.2	69974.1
High	Master Protein	Q01080	DNA-directed RNA polymerase I subunit RPA49 OS=Saccharomyces cerevisiae (strain ATCC 204508 / S288c) OX=559292 GN=RPA49 PE=1 SV=2	0.86	-0.22	0.328491	91.8	106.7	31324.1	28882.3	37169.8	35204.7	36684.9	36420.7	28415.1	25118.8	342.5	27115.6	35125.9	35117.8
High	Master Protein	P54860	E4 ubiquitin-protein ligase UFD2 OS=Saccharomyces cerevisiae (strain ATCC 204508 / S288c) OX=559292 GN=UFD2 PE=1 SV=3	1.307	0.39	2.19528e-05	109.3	83.6	15636	16304.9	15804	12087.7	12106.3	11885	14184	14180.3	145.6	9310.3	11591.8	11459.8
High	Master Protein	Q05580	E3 ubiquitin-protein ligase HEL2 OS=Saccharomyces cerevisiae (strain ATCC 204508 / S288c) OX=559292 GN=HEL2 PE=1 SV=1	1.323	0.4	0.157795	116.5	88	9498.8	9547.3	7168.7	7330.2	7170.4	7177.6	8616.7	8303.3	66.1	5645.9	6865.7	6920.9
High	Master Protein	P37838	Nucleolar protein 4 OS=Saccharomyces cerevisiae (strain ATCC 204508 / S288c) OX=559292 GN=NOP4 PE=1 SV=1	1.115	0.16	0.0269601	109.9	98.6	24045.1	23249.1	26584.9	22046.5	20638.3	21570.9	21812.1	20219.6	245	16980.8	19761.2	20799.2
High	Master Protein	P13298	Orotate phosphoribosyltransferase 1 OS=Saccharomyces cerevisiae (strain ATCC 204508 / S288c) OX=559292 GN=URA5 PE=1 SV=2	0.658	-0.6	0.21908	83.3	126.6	20601.9	23273.9	36542.4	36035.7	35382.8	33028.7	18688.6	20241.1	336.7	27755.7	33879	31847.1
High	Master Protein	P34160	Nuclear cap-binding protein complex subunit 1 OS=Saccharomyces cerevisiae (strain ATCC 204508 / S288c) OX=559292 GN=STO1 PE=1 SV=2	1.039	0.05	0.82992	102.6	98.7	27864.9	28736.9	25485.8	26974.6	26825.1	25778.1	25277.2	24992.3	234.9	20776.6	25685	24855.9
High	Master Protein	P40531	Protein GVP36 OS=Saccharomyces cerevisiae (strain ATCC 204508 / S288c) OX=559292 GN=GVP36 PE=1 SV=1	1.028	0.04	0.88996	96	93.4	48261.8	48613.8	45650.5	46637.3	46970.8	46951.2	43779.9	42279.1	420.7	35921.3	44974.6	45271.5
High	Master Protein	P35169	Serine/threonine-protein kinase TOR1 OS=Saccharomyces cerevisiae (strain ATCC 204508 / S288c) OX=559292 GN=TOR1 PE=1 SV=3	0.941	-0.09	0.999934	97.9	104	3902.3	4053.2	5544.8	4698.1	4265.4	4307.2	3539.9	3525	51.1	3618.6	4084.2	4153.1
High	Master Protein	Q06103	26S proteasome regulatory subunit RPN7 OS=Saccharomyces cerevisiae (strain ATCC 204508 / S288c) OX=559292 GN=RPN7 PE=1 SV=3	1.197	0.26	0.00523862	104.5	87.3	43629.2	42906	50431	37400.9	36453.9	36023	39577.5	37315.1	464.7	28807.2	34904.7	34734.3
High	Master Protein	P01120	Ras-like protein 2 OS=Saccharomyces cerevisiae (strain ATCC 204508 / S288c) OX=559292 GN=RAS2 PE=1 SV=4	1.554	0.64	2.0931e-05	119.5	76.9	16606.1	17614.9	18722	11238.2	11557.9	11332.2	15063.9	15319.5	172.5	8656	11066.7	10926.8
High	Master Protein	Q06179	Protein FMP27, mitochondrial OS=Saccharomyces cerevisiae (strain ATCC 204508 / S288c) OX=559292 GN=FMP27 PE=1 SV=1	1.338	0.42	5.3769e-05	122.9	91.8	7554.1	7599.1	7566.6	5568.5	5712.4	5654.5	6852.5	6608.9	69.7	4289	5469.7	5452.2
High	Master Protein	P07703	DNA-directed RNA polymerases I and III subunit RPAC1 OS=Saccharomyces cerevisiae (strain ATCC 204508 / S288c) OX=559292 GN=RPC40 PE=1 SV=1	1.181	0.24	0.332776	105.7	89.5	49349	47810.7	38708.3	41115.1	40485.3	39700.1	44766.1	41580.6	356.7	31668	38764.7	38279.8
High	Master Protein	P38777	Family of serine hydrolases 1 OS=Saccharomyces cerevisiae (strain ATCC 204508 / S288c) OX=559292 GN=FSH1 PE=1 SV=1	1.228	0.3	0.00727809	113.5	92.4	29723.1	32027.3	36486.3	26448.2	25007.9	26081	26962.8	27853.9	336.2	20371.1	23945.1	25148
High	Master Protein	P04046	Amidophosphoribosyltransferase OS=Saccharomyces cerevisiae (strain ATCC 204508 / S288c) OX=559292 GN=ADE4 PE=1 SV=2	1.083	0.12	0.957657	98.7	91.1	24413.3	23368.8	20759.2	24270.5	20824.1	21574.2	22146.1	20323.7	191.3	18693.8	19939.1	20802.3
High	Master Protein	P32349	DNA-directed RNA polymerase III subunit RPC3 OS=Saccharomyces cerevisiae (strain ATCC 204508 / S288c) OX=559292 GN=RPC82 PE=1 SV=2	0.848	-0.24	0.982062	87.8	103.5	12331.7	12669.4	18762.8	15286.1	14941.6	14417.1	11186.5	11018.5	172.9	11773.8	14306.6	13901.4
High	Master Protein	P14065	Glycerol 2-dehydrogenase (NADP(+)) OS=Saccharomyces cerevisiae (strain ATCC 204508 / S288c) OX=559292 GN=GCY1 PE=1 SV=1	2.197	1.14	0.00111637	114.2	52	23664.4	27677.4	17141.7	10968.3	10771.5	10553.6	21466.8	24070.8	158	8448.1	10313.8	10176.1
High	Master Protein	P33775	Dolichyl-phosphate-mannose--protein mannosyltransferase 1 OS=Saccharomyces cerevisiae (strain ATCC 204508 / S288c) OX=559292 GN=PMT1 PE=1 SV=1	0.757	-0.4	0.536761	79.2	104.7	16408.5	15870.4	24253.2	21829.4	21687.5	20839.2	14884.7	13802.4	223.5	16813.6	20765.8	20093.7
High	Master Protein	P07991	Ornithine aminotransferase OS=Saccharomyces cerevisiae (strain ATCC 204508 / S288c) OX=559292 GN=CAR2 PE=1 SV=2	0.968	-0.05	0.786458	89.2	92.1	17043.1	17781.9	19308.1	20963.1	18365.3	17833.4	15460.3	15464.8	177.9	16146.3	17584.8	17195.4
High	Master Protein	P53741	UBP3-associated protein BRE5 OS=Saccharomyces cerevisiae (strain ATCC 204508 / S288c) OX=559292 GN=BRE5 PE=1 SV=1	1.121	0.16	0.00615338	107.5	95.9	15894.1	16033.6	17427.2	14759.1	14301	14135	14418.1	13944.3	160.6	11367.9	13693.2	13629.4
High	Master Protein	P37304	Protein PAM1 OS=Saccharomyces cerevisiae (strain ATCC 204508 / S288c) OX=559292 GN=PAM1 PE=1 SV=2	1.013	0.02	0.995011	96.1	94.9	7785.9	8668.5	7093	7877.5	7685.4	7642.2	7062.9	7538.9	65.4	6067.5	7358.8	7368.8
High	Master Protein	Q07478	ATP-dependent RNA helicase SUB2 OS=Saccharomyces cerevisiae (strain ATCC 204508 / S288c) OX=559292 GN=SUB2 PE=1 SV=1	0.824	-0.28	0.757556	91	110.5	48472.5	44888.2	67958.8	59944.9	58856.4	56222.8	43971.1	39039	626.3	46171.2	56355	54211.4
High	Master Protein	P16467	Pyruvate decarboxylase isozyme 2 OS=Saccharomyces cerevisiae (strain ATCC 204508 / S288c) OX=559292 GN=PDC5 PE=1 SV=4	1.019	0.03	0.994072	90.4	88.7	3141.7	3427.9	2797.4	3096.2	3052.1	3081.8	2849.9	2981.2	25.8	2384.8	2922.4	2971.6
High	Master Protein	Q10740	Leucine aminopeptidase 2 OS=Saccharomyces cerevisiae (strain ATCC 204508 / S288c) OX=559292 GN=LAP2 PE=1 SV=1	1.212	0.28	0.00996752	117.7	97.1	34391.2	37832.9	41206	31217.5	30204.9	31887.1	31197.4	32903	379.7	24044.6	28921.3	30746.3
High	Master Protein	P22203	V-type proton ATPase subunit E OS=Saccharomyces cerevisiae (strain ATCC 204508 / S288c) OX=559292 GN=VMA4 PE=1 SV=4	0.798	-0.33	0.000343283	90.3	113.2	60395.3	59853.7	61497.5	75688.6	76083.1	72910.1	54786.6	52054.4	566.7	58297.4	72849.7	70301.7
High	Master Protein	P54781	Cytochrome P450 61 OS=Saccharomyces cerevisiae (strain ATCC 204508 / S288c) OX=559292 GN=ERG5 PE=1 SV=1	0.88	-0.18	0.00454989	90.9	103.3	23019.3	22669.4	23793.4	26152.4	27499	25720.4	20881.6	19715.4	219.3	20143.3	26330.3	24800.3
High	Master Protein	Q04279	Eisosome protein SEG1 OS=Saccharomyces cerevisiae (strain ATCC 204508 / S288c) OX=559292 GN=SEG1 PE=1 SV=1	1.26	0.33	0.000424119	114.9	91.2	6283.2	6656.2	6948.6	5016.8	5417.2	5281	5699.7	5788.8	64	3864.1	5187	5092.1
High	Master Protein	P31380	ATP-dependent helicase FUN30 OS=Saccharomyces cerevisiae (strain ATCC 204508 / S288c) OX=559292 GN=FUN30 PE=1 SV=1	1.132	0.18	0.305256	99.8	88.2	12620.9	13037.6	25322.8	11442.6	11815.1	11516.5	11448.8	11338.7	233.4	8813.4	11312.9	11104.5
High	Master Protein	Q06833	Nucleus-vacuole junction protein 2 OS=Saccharomyces cerevisiae (strain ATCC 204508 / S288c) OX=559292 GN=NVJ2 PE=1 SV=1	0.876	-0.19	0.863205	92.1	105.2	8061.2	8508.5	10885.2	9717.8	9810.9	9341.5	7312.6	7399.8	100.3	7484.9	9393.9	9007.3
High	Master Protein	P32476	Squalene monooxygenase OS=Saccharomyces cerevisiae (strain ATCC 204508 / S288c) OX=559292 GN=ERG1 PE=1 SV=2	0.749	-0.42	0.336816	80.5	107.4	33794.2	31163.9	48180.4	45094.6	43442.1	45755.5	30655.8	27103.1	444	34733.1	41595.9	44118.6
High	Master Protein	P35732	RNA polymerase II degradation factor 1 OS=Saccharomyces cerevisiae (strain ATCC 204508 / S288c) OX=559292 GN=DEF1 PE=1 SV=1	1.493	0.58	0.00151669	119.3	79.9	36683.1	36642	32428.5	21421.7	24670.9	24544.8	33276.4	31867.3	298.8	16499.6	23622.5	23666.7
High	Master Protein	Q12211	tRNA pseudouridine synthase 1 OS=Saccharomyces cerevisiae (strain ATCC 204508 / S288c) OX=559292 GN=PUS1 PE=1 SV=1	1.057	0.08	0.999951	100.7	95.3	23436.9	22198.6	18517	22319.8	20733	21005.8	21260.4	19306	170.6	17191.3	19851.9	20254.3
High	Master Protein	Q06078	U3 small nucleolar RNA-associated protein 21 OS=Saccharomyces cerevisiae (strain ATCC 204508 / S288c) OX=559292 GN=UTP21 PE=1 SV=1	1.074	0.1	0.00533139	104.1	97	18128.1	17817.4	17969.6	17149.7	16245.1	16734.9	16444.6	15495.7	165.6	13209.2	15554.7	16136.2
High	Master Protein	P40510	D-3-phosphoglycerate dehydrogenase 2 OS=Saccharomyces cerevisiae (strain ATCC 204508 / S288c) OX=559292 GN=SER33 PE=1 SV=1	0.833	-0.26	0.18153	80	96.1	20899.7	21427	25379.3	25730.7	26108.8	24908	18958.8	18634.9	233.9	19818.5	24999.2	24017
High	Master Protein	P41921	Glutathione reductase OS=Saccharomyces cerevisiae (strain ATCC 204508 / S288c) OX=559292 GN=GLR1 PE=1 SV=2	1.408	0.49	0.00272174	117.9	83.7	36025.5	37690.6	42584.5	26246.2	26770.2	27851.5	32679.9	32779.3	392.4	20215.5	25632.5	26855.1
High	Master Protein	P43555	Protein EMP47 OS=Saccharomyces cerevisiae (strain ATCC 204508 / S288c) OX=559292 GN=EMP47 PE=1 SV=1	1.276	0.35	3.0358e-06	110.6	86.7	32526.3	31516.2	31563.7	25304	24742.9	24106.3	29505.7	27409.4	290.9	19489.8	23691.4	23243.9
High	Master Protein	P32178	Chorismate mutase OS=Saccharomyces cerevisiae (strain ATCC 204508 / S288c) OX=559292 GN=ARO7 PE=1 SV=1	1.037	0.05	0.999829	95.4	92	33255.1	31290.8	26874	29664.5	30890.7	30169.5	30166.8	27213.4	247.6	22848.4	29577.9	29090.2
High	Master Protein	P39004	High-affinity hexose transporter HXT7 OS=Saccharomyces cerevisiae (strain ATCC 204508 / S288c) OX=559292 GN=HXT7 PE=1 SV=1	2.001	1	9.45603e-06	98.2	49.1	46746.5	45535.9	40604.3	23242.2	22752.3	21233.3	42405.3	39602.3	374.2	17901.8	21785.4	20473.6
High	Master Protein	Q12377	26S proteasome regulatory subunit RPN6 OS=Saccharomyces cerevisiae (strain ATCC 204508 / S288c) OX=559292 GN=RPN6 PE=1 SV=3	1.3	0.38	0.168879	110.5	85	37530.7	37770.8	28344.6	29388.2	28868.2	28249.5	34045.3	32849	261.2	22635.6	27641.4	27238.8
High	Master Protein	P45818	ATP-dependent RNA helicase ROK1 OS=Saccharomyces cerevisiae (strain ATCC 204508 / S288c) OX=559292 GN=ROK1 PE=1 SV=1	0.993	-0.01	0.964487	102.1	102.8	19043.7	18674.8	22689.4	20469.7	19099.1	19176.4	17275.2	16241.4	209.1	15766.3	18287.4	18490.4
High	Master Protein	P26783	40S ribosomal protein S5 OS=Saccharomyces cerevisiae (strain ATCC 204508 / S288c) OX=559292 GN=RPS5 PE=1 SV=3	0.892	-0.17	0.0580641	100	112.2	202515	199675	163716	217840	223895	225395	183708	173656	1508.7	167786	214380	217331
High	Master Protein	P53877	Pre-rRNA-processing protein IPI3 OS=Saccharomyces cerevisiae (strain ATCC 204508 / S288c) OX=559292 GN=IPI3 PE=1 SV=1	0.935	-0.1	0.305655	98.7	105.5	18228.1	18132.4	19156.5	20077	19491.4	19270.6	16535.3	15769.6	176.5	15463.9	18663	18581.2
High	Master Protein	P04076	Argininosuccinate lyase OS=Saccharomyces cerevisiae (strain ATCC 204508 / S288c) OX=559292 GN=ARG4 PE=1 SV=2	2.603	1.38	0.0398227	161.1	61.9	80721	78944.9	35258.8	27289.6	30763.2	30329	73224.7	68657.9	324.9	21019.2	29455.8	29243.9
High	Master Protein	P35844	Oxysterol-binding protein homolog 4 OS=Saccharomyces cerevisiae (strain ATCC 204508 / S288c) OX=559292 GN=KES1 PE=1 SV=1	1.024	0.03	1	101.4	99	64505.6	64053.3	58008.2	61227.5	62627.7	62544.6	58515.2	55706.7	534.6	47159.1	59966.1	60307.1
High	Master Protein	P02557	Tubulin beta chain OS=Saccharomyces cerevisiae (strain ATCC 204508 / S288c) OX=559292 GN=TUB2 PE=1 SV=2	0.787	-0.35	0.0143644	87.5	111.1	32325.4	32295.3	37704.4	41075.8	41095.8	40590.7	29323.4	28087	347.5	31637.7	39349.3	39138.5
High	Master Protein	P53912	Uncharacterized protein YNL134C OS=Saccharomyces cerevisiae (strain ATCC 204508 / S288c) OX=559292 GN=YNL134C PE=1 SV=1	1.247	0.32	0.102145	104.1	83.5	33101.2	39481.4	40545.5	31657.1	30605.2	33911	30027.2	34336.7	373.6	24383.2	29304.5	32697.8
High	Master Protein	P38009	Bifunctional purine biosynthesis protein ADE17 OS=Saccharomyces cerevisiae (strain ATCC 204508 / S288c) OX=559292 GN=ADE17 PE=1 SV=2	1.088	0.12	0.245903	85	78.2	4241.5	4291.8	5848.2	4142.2	3945.9	3916.5	3847.6	3732.5	53.9	3190.4	3778.2	3776.4
High	Master Protein	P23641	Mitochondrial phosphate carrier protein OS=Saccharomyces cerevisiae (strain ATCC 204508 / S288c) OX=559292 GN=MIR1 PE=1 SV=1	0.723	-0.47	0.606491	75.6	104.7	34551	37771.3	62065.2	52257	53341.9	49610.4	31342.3	32849.4	571.9	40249.7	51074.9	47835.6
High	Master Protein	Q04305	U3 small nucleolar RNA-associated protein 15 OS=Saccharomyces cerevisiae (strain ATCC 204508 / S288c) OX=559292 GN=UTP15 PE=1 SV=1	1.132	0.18	0.628073	105.8	93.5	19747.1	19757.7	16421.2	17448.5	17793.2	17191.9	17913.2	17183.2	151.3	13439.3	17037	16576.8
High	Master Protein	P53978	Elongation factor 3B OS=Saccharomyces cerevisiae (strain ATCC 204508 / S288c) OX=559292 GN=HEF3 PE=1 SV=2	0.832	-0.26	0.0816842	93	111.7	2780.4	2791	1762.9	3985.3	3340.9	3212.6	2522.2	2427.3	16.2	3069.6	3198.9	3097.7
High	Master Protein	P07275	Delta-1-pyrroline-5-carboxylate dehydrogenase, mitochondrial OS=Saccharomyces cerevisiae (strain ATCC 204508 / S288c) OX=559292 GN=PUT2 PE=1 SV=2	1.364	0.45	0.00114464	109.3	80.1	38742.1	39007.5	33843.4	27502.5	28404.6	28431.4	35144.3	33924.6	311.9	21183.1	27197.5	27414.2
High	Master Protein	Q99258	3,4-dihydroxy-2-butanone 4-phosphate synthase OS=Saccharomyces cerevisiae (strain ATCC 204508 / S288c) OX=559292 GN=RIB3 PE=1 SV=1	1.236	0.31	0.607559	109.8	88.9	34708.8	36469.9	25194.5	28084.4	25289.8	30150.4	31485.5	31717.7	232.2	21631.4	24215	29071.8
High	Master Protein	P38882	U3 small nucleolar RNA-associated protein 9 OS=Saccharomyces cerevisiae (strain ATCC 204508 / S288c) OX=559292 GN=UTP9 PE=1 SV=1	0.939	-0.09	0.509355	95.8	102.1	16537.3	17196.4	18033.1	18311.2	18330.4	17573.3	15001.5	14955.6	166.2	14103.8	17551.4	16944.7
High	Master Protein	Q05775	Eukaryotic translation initiation factor 3 subunit J OS=Saccharomyces cerevisiae (strain ATCC 204508 / S288c) OX=559292 GN=HCR1 PE=1 SV=1	1.151	0.2	0.617795	117.1	101.7	50240.4	50546.7	41645.6	42664.7	43646.7	46634.6	45574.7	43960.1	383.8	32861.5	41791.8	44966.2
High	Master Protein	P33307	Importin alpha re-exporter OS=Saccharomyces cerevisiae (strain ATCC 204508 / S288c) OX=559292 GN=CSE1 PE=1 SV=2	0.862	-0.21	0.372694	89.7	104.1	12947.9	13215.5	15720.1	16372	15333.2	14869	11745.4	11493.5	144.9	12610.1	14681.5	14337
High	Master Protein	P38810	SED5-binding protein 3 OS=Saccharomyces cerevisiae (strain ATCC 204508 / S288c) OX=559292 GN=SFB3 PE=1 SV=1	0.887	-0.17	0.86396	92.5	104.3	14374.5	15716.4	20872.2	17582.3	18572.4	17710.6	13039.6	13668.5	192.3	13542.4	17783.1	17077
High	Master Protein	P14832	Peptidyl-prolyl cis-trans isomerase OS=Saccharomyces cerevisiae (strain ATCC 204508 / S288c) OX=559292 GN=CPR1 PE=1 SV=3	0.632	-0.66	0.0120502	92.1	145.6	135689	163941	109485	214551	200577	230536	123088	142578	1008.9	165253	192053	222289
High	Master Protein	Q08985	Homocysteine S-methyltransferase 2 OS=Saccharomyces cerevisiae (strain ATCC 204508 / S288c) OX=559292 GN=SAM4 PE=1 SV=1	1.269	0.34	0.497973	125.2	98.6	40862.3	39605	28273.2	31936.7	31198.2	30794.1	37067.5	34444.2	260.5	24598.5	29872.3	29692.4
High	Master Protein	P39013	Actin cytoskeleton-regulatory complex protein END3 OS=Saccharomyces cerevisiae (strain ATCC 204508 / S288c) OX=559292 GN=END3 PE=1 SV=1	0.917	-0.12	0.739167	89.7	97.8	13835.1	14311.1	16377.9	15605.7	15689.3	15111.5	12550.3	12446.2	150.9	12019.9	15022.5	14570.9
High	Master Protein	Q08822	Probable electron transfer flavoprotein-ubiquinone oxidoreductase, mitochondrial OS=Saccharomyces cerevisiae (strain ATCC 204508 / S288c) OX=559292 GN=CIR2 PE=1 SV=1	0.784	-0.35	0.99938	88.1	112.3	6734.4	7866.9	17235.8	10031.6	10082.4	9750.9	6109	6841.8	158.8	7726.6	9653.9	9402.1
High	Master Protein	P38086	DNA repair and recombination protein RDH54 OS=Saccharomyces cerevisiae (strain ATCC 204508 / S288c) OX=559292 GN=RDH54 PE=1 SV=4	1.003	0	0.877567	102.1	101.9	6421.3	6612.9	7709.2	6506.3	6596.3	6860.8	5824.9	5751.2	71	5011.3	6316	6615.3
High	Master Protein	P13382	DNA polymerase alpha catalytic subunit A OS=Saccharomyces cerevisiae (strain ATCC 204508 / S288c) OX=559292 GN=POL1 PE=1 SV=2	1.085	0.12	0.168721	108	99.5	10098.6	10250.1	9324.5	9398.2	9307.7	9067.9	9160.8	8914.5	85.9	7238.7	8912.1	8743.5
High	Master Protein	P43638	MAP-homologous protein 1 OS=Saccharomyces cerevisiae (strain ATCC 204508 / S288c) OX=559292 GN=MHP1 PE=1 SV=1	1.183	0.24	0.071206	102.3	86.4	6132.1	6528.4	8233	5518.6	5373.6	5794.8	5562.7	5677.7	75.9	4250.6	5145.2	5587.5
High	Master Protein	P32471	Elongation factor 1-beta OS=Saccharomyces cerevisiae (strain ATCC 204508 / S288c) OX=559292 GN=EFB1 PE=1 SV=4	0.854	-0.23	0.0108746	99.8	116.8	138974	135182	140740	162686	152516	172476	126068	117567	1296.9	125305	146034	166305
High	Master Protein	P05739	60S ribosomal protein L6-B OS=Saccharomyces cerevisiae (strain ATCC 204508 / S288c) OX=559292 GN=RPL6B PE=1 SV=4	0.659	-0.6	0.00115511	82.4	124.9	149887	146672	174170	219033	232610	227308	135967	127559	1605	168705	222725	219176
High	Master Protein	P47083	U3 small nucleolar RNA-associated protein MPP10 OS=Saccharomyces cerevisiae (strain ATCC 204508 / S288c) OX=559292 GN=MPP10 PE=1 SV=1	0.974	-0.04	0.491535	109.8	112.7	18019.5	18377	15298	17920.1	18506	18938	16346.1	15982.3	141	13802.5	17719.5	18260.5
High	Master Protein	Q12018	Cell division control protein 53 OS=Saccharomyces cerevisiae (strain ATCC 204508 / S288c) OX=559292 GN=CDC53 PE=1 SV=1	1.201	0.26	0.000106173	106.7	88.8	16509.6	17254	16017.1	13853.4	13745.5	13725.9	14976.4	15005.7	147.6	10670.3	13161.3	13234.9
High	Master Protein	Q04500	U3 small nucleolar RNA-associated protein 14 OS=Saccharomyces cerevisiae (strain ATCC 204508 / S288c) OX=559292 GN=UTP14 PE=1 SV=1	1.178	0.24	0.00056283	117.8	100	16377.2	16146.9	17021.3	13904.4	12959.7	13973	14856.3	14042.9	156.9	10709.6	12409	13473.1
High	Master Protein	P35845	Oxysterol-binding protein homolog 1 OS=Saccharomyces cerevisiae (strain ATCC 204508 / S288c) OX=559292 GN=SWH1 PE=1 SV=4	1.123	0.17	0.26435	100.3	89.3	7553.3	8048.3	6737.8	6928.4	6635.7	6725.2	6851.8	6999.5	62.1	5336.5	6353.7	6484.6
High	Master Protein	P13587	Sodium transport ATPase 1 OS=Saccharomyces cerevisiae (strain ATCC 204508 / S288c) OX=559292 GN=ENA1 PE=1 SV=1	0.992	-0.01	0.93516	86	86.8	9241.8	9094.2	11648.5	9320.4	10044.8	9183.8	8383.6	7909.2	107.3	7178.8	9617.9	8855.3
High	Master Protein	Q02326	60S ribosomal protein L6-A OS=Saccharomyces cerevisiae (strain ATCC 204508 / S288c) OX=559292 GN=RPL6A PE=1 SV=2	0.766	-0.38	0.050593	91	118.7	57811.8	58141.9	71807.7	75880.4	77835.1	72854.4	52443	50565.6	661.7	58445.2	74527.2	70248.1
High	Master Protein	P22855	Alpha-mannosidase OS=Saccharomyces cerevisiae (strain ATCC 204508 / S288c) OX=559292 GN=AMS1 PE=1 SV=2	1.736	0.8	0.000940437	105.9	61	6946.5	8160.7	9294.3	5123.3	4675.1	4700.4	6301.4	7097.3	85.6	3946.1	4476.4	4532.2
High	Master Protein	P0CX52	40S ribosomal protein S16-B OS=Saccharomyces cerevisiae (strain ATCC 204508 / S288c) OX=559292 GN=RPS16B PE=1 SV=1	0.851	-0.23	0.0470297	95.5	112.2	145830	136815	111920	162361	160208	160746	132288	118987	1031.4	125055	153399	154995
High	Master Protein	P25635	Periodic tryptophan protein 2 OS=Saccharomyces cerevisiae (strain ATCC 204508 / S288c) OX=559292 GN=PWP2 PE=1 SV=2	1.228	0.3	0.446644	117.2	95.4	29143.7	27365.8	20927.1	22281.2	23195.1	22236.5	26437.2	23799.8	192.8	17161.6	22209.4	21441
High	Master Protein	P24583	Protein kinase C-like 1 OS=Saccharomyces cerevisiae (strain ATCC 204508 / S288c) OX=559292 GN=PKC1 PE=1 SV=3	1.089	0.12	0.0242625	105.5	96.9	6333.5	6392.7	6878.8	5870.2	5913.1	5597.8	5745.4	5559.7	63.4	4521.4	5661.8	5397.6
High	Master Protein	P39526	AP-1 accessory protein LAA1 OS=Saccharomyces cerevisiae (strain ATCC 204508 / S288c) OX=559292 GN=LAA1 PE=1 SV=1	0.816	-0.29	0.00322913	87.7	107.4	5594.2	5838.5	5401.2	6855.5	6931.7	6494.1	5074.7	5077.7	49.8	5280.3	6637.1	6261.8
High	Master Protein	P34760	Peroxiredoxin TSA1 OS=Saccharomyces cerevisiae (strain ATCC 204508 / S288c) OX=559292 GN=TSA1 PE=1 SV=3	0.702	-0.51	0.0700076	77.1	109.8	66154.9	64823.8	91298.8	100830	94171.2	91789.9	60011.3	56376.9	841.3	77662.4	90169.1	88506.1
High	Master Protein	P48164	40S ribosomal protein S7-B OS=Saccharomyces cerevisiae (strain ATCC 204508 / S288c) OX=559292 GN=RPS7B PE=1 SV=1	0.865	-0.21	0.0267316	93.3	107.9	145086	138641	156353	167649	169466	160242	131612	120575	1440.8	129128	162264	154509
High	Master Protein	Q12449	Hsp90 co-chaperone AHA1 OS=Saccharomyces cerevisiae (strain ATCC 204508 / S288c) OX=559292 GN=AHA1 PE=1 SV=1	1.562	0.64	0.0872648	142.6	91.3	67475.2	68370.7	45320.8	39905.5	46818.5	43202	61209	59461.6	417.6	30736.3	44828.8	41656.4
High	Master Protein	P40016	26S proteasome regulatory subunit RPN3 OS=Saccharomyces cerevisiae (strain ATCC 204508 / S288c) OX=559292 GN=RPN3 PE=1 SV=5	1.094	0.13	0.716532	108	98.7	36533	37376	30700.8	31868.7	33379.3	33654.3	33140.3	32505.7	282.9	24546.2	31960.8	32450.3
High	Master Protein	P32794	ATPase family gene 2 protein OS=Saccharomyces cerevisiae (strain ATCC 204508 / S288c) OX=559292 GN=AFG2 PE=1 SV=1	0.934	-0.1	0.177995	95.9	102.8	10670.2	10483.8	9692.3	11653.2	11230.3	10728	9679.3	9117.7	89.3	8975.6	10753	10344.2
High	Master Protein	P41697	Bud site selection protein 6 OS=Saccharomyces cerevisiae (strain ATCC 204508 / S288c) OX=559292 GN=BUD6 PE=1 SV=1	1.228	0.3	0.000320414	108	88	7448.5	7750.1	7457	6232.2	6074.2	5878.4	6756.8	6740.2	68.7	4800.2	5816	5668.1
High	Master Protein	P0CX14	Y' element ATP-dependent helicase protein 1 copy 3 OS=Saccharomyces cerevisiae (strain ATCC 204508 / S288c) OX=559292 GN=YRF1-3 PE=2 SV=1	1.074	0.1	0.463256	106.1	98.8	3406.5	3492	5676.5	3482.4	3251	3241.5	3090.1	3037	52.3	2682.2	3112.9	3125.5
High	Master Protein	Q04373	Pumilio homology domain family member 6 OS=Saccharomyces cerevisiae (strain ATCC 204508 / S288c) OX=559292 GN=PUF6 PE=1 SV=1	1.292	0.37	0.000505207	115.2	89.2	42562.4	40876.1	37601	30219.8	32389.8	31647.5	38609.8	35549.7	346.5	23276.1	31013.3	30515.3
High	Master Protein	P40212	60S ribosomal protein L13-B OS=Saccharomyces cerevisiae (strain ATCC 204508 / S288c) OX=559292 GN=RPL13B PE=1 SV=1	0.89	-0.17	0.236047	98.3	110.5	164932	158740	113385	182430	170912	178372	149616	138055	1044.9	140513	163648	171990
High	Master Protein	Q01896	Sodium transport ATPase 2 OS=Saccharomyces cerevisiae (strain ATCC 204508 / S288c) OX=559292 GN=ENA2 PE=1 SV=1	0.546	-0.87	0.00118721	77.3	141.6	215.4	200.5	257.8	427	394.3	351.2	195.4	174.4	2.4	328.9	377.5	338.7
High	Master Protein	P32909	Protein SMY2 OS=Saccharomyces cerevisiae (strain ATCC 204508 / S288c) OX=559292 GN=SMY2 PE=1 SV=2	0.802	-0.32	0.000784026	89	110.9	9413.7	9755.6	8633.6	11738.7	11774	11542.7	8539.5	8484.4	79.6	9041.5	11273.6	11129.8
High	Master Protein	P31382	Dolichyl-phosphate-mannose--protein mannosyltransferase 2 OS=Saccharomyces cerevisiae (strain ATCC 204508 / S288c) OX=559292 GN=PMT2 PE=1 SV=2	0.817	-0.29	0.121075	73.4	89.8	18760.9	17224.9	22497.9	23112.9	22972.7	22275.1	17018.6	14980.4	207.3	17802.2	21996.4	21478.2
High	Master Protein	Q04062	26S proteasome regulatory subunit RPN9 OS=Saccharomyces cerevisiae (strain ATCC 204508 / S288c) OX=559292 GN=RPN9 PE=1 SV=1	1.18	0.24	0.0699168	100.5	85.2	63034.9	63707.6	55068	55287.8	53441	51400.8	57181.1	55406.1	507.5	42584.2	51169.9	49562
High	Master Protein	P53297	PAB1-binding protein 1 OS=Saccharomyces cerevisiae (strain ATCC 204508 / S288c) OX=559292 GN=PBP1 PE=1 SV=1	1.207	0.27	0.211418	112.7	93.4	21993.4	22102.9	18126.7	18947.4	18227	18059.8	19951	19222.8	167	14593.8	17452.4	17413.7
High	Master Protein	Q03161	Glucose-6-phosphate 1-epimerase OS=Saccharomyces cerevisiae (strain ATCC 204508 / S288c) OX=559292 GN=YMR099C PE=1 SV=1	1.115	0.16	0.00243214	100.7	90.2	38535.2	40433	40025.2	35887	36335.4	35510.1	34956.5	35164.3	368.8	27641.1	34791.2	34239.7
High	Master Protein	Q07896	Nucleolar complex-associated protein 3 OS=Saccharomyces cerevisiae (strain ATCC 204508 / S288c) OX=559292 GN=NOC3 PE=1 SV=1	0.933	-0.1	0.486081	98.9	106	10209.6	10517.6	11001.6	11274	11347.3	10708.2	9261.5	9147.1	101.4	8683.6	10865.1	10325.2
High	Master Protein	Q07418	Peroxisomal membrane protein import receptor PEX19 OS=Saccharomyces cerevisiae (strain ATCC 204508 / S288c) OX=559292 GN=PEX19 PE=1 SV=2	1.814	0.86	0.0247794	133.1	73.4	17865.3	20273.7	12184.8	9846.2	9130.5	10802.9	16206.2	17631.9	112.3	7583.8	8742.5	10416.4
High	Master Protein	P32621	Guanosine-diphosphatase OS=Saccharomyces cerevisiae (strain ATCC 204508 / S288c) OX=559292 GN=GDA1 PE=1 SV=1	0.752	-0.41	0.0901014	86.6	115.1	12515.1	12235.8	16473	16407.3	17560.8	16637.2	11352.8	10641.4	151.8	12637.3	16814.5	16042
High	Master Protein	P38817	ADP-ribosylation factor-binding protein GGA2 OS=Saccharomyces cerevisiae (strain ATCC 204508 / S288c) OX=559292 GN=GGA2 PE=1 SV=1	1.004	0.01	0.680026	99	98.5	26893.7	26661.3	27688.2	26220.7	26774.5	27060.8	24396.2	23187.1	255.2	20195.9	25636.7	26092.7
High	Master Protein	P43590	Uncharacterized peptidase YFR006W OS=Saccharomyces cerevisiae (strain ATCC 204508 / S288c) OX=559292 GN=YFR006W PE=1 SV=1	1.19	0.25	0.721627	109	91.6	30068.5	30284.2	22484.9	25545.9	24758.2	25269.4	27276.1	26338	207.2	19676.2	23706	24365.4
High	Master Protein	Q02908	Elongator complex protein 3 OS=Saccharomyces cerevisiae (strain ATCC 204508 / S288c) OX=559292 GN=ELP3 PE=1 SV=1	0.969	-0.05	0.55594	101.8	105.1	13519.7	13443.5	13508.9	14919.4	13946.5	13423	12264.2	11691.7	124.5	11491.3	13353.8	12942.8
High	Master Protein	P36046	Mitochondrial intermembrane space import and assembly protein 40 OS=Saccharomyces cerevisiae (strain ATCC 204508 / S288c) OX=559292 GN=MIA40 PE=1 SV=2	2.206	1.14	0.00281864	135.8	61.6	23737.9	24276.3	15753.1	10530.2	10882.8	10762.2	21533.4	21112.9	145.2	8110.6	10420.3	10377.1
High	Master Protein	P47077	Nucleolar protein 9 OS=Saccharomyces cerevisiae (strain ATCC 204508 / S288c) OX=559292 GN=NOP9 PE=1 SV=1	0.974	-0.04	0.601078	101.9	104.6	20641.2	20910.4	21851.4	21468.7	21130.9	22966.6	18724.3	18185.7	201.4	16535.8	20232.9	22145
High	Master Protein	P39106	Alpha-1,3-mannosyltransferase MNN1 OS=Saccharomyces cerevisiae (strain ATCC 204508 / S288c) OX=559292 GN=MNN1 PE=1 SV=1	0.959	-0.06	0.674148	101	105.4	17959.5	19200.5	20359.4	19629.5	20199.5	20026.8	16291.7	16698.5	187.6	15119.2	19341	19310.4
High	Master Protein	P43583	Proteasome activator BLM10 OS=Saccharomyces cerevisiae (strain ATCC 204508 / S288c) OX=559292 GN=BLM10 PE=1 SV=2	1.009	0.01	0.823522	111.4	110.4	6443.1	6670.1	4643.5	6531.1	6388.4	6074.7	5844.7	5801	42.8	5030.5	6116.9	5857.4
High	Master Protein	P21951	DNA polymerase epsilon catalytic subunit A OS=Saccharomyces cerevisiae (strain ATCC 204508 / S288c) OX=559292 GN=POL2 PE=1 SV=1	0.959	-0.06	0.981191	102.1	106.4	5285.2	5621.2	6429.6	5831.8	5859.4	5894.6	4794.4	4888.7	59.3	4491.8	5610.4	5683.7
High	Master Protein	P31384	CCR4-Not complex 3'-5'-exoribonuclease subunit Ccr4 OS=Saccharomyces cerevisiae (strain ATCC 204508 / S288c) OX=559292 GN=CCR4 PE=1 SV=2	1.128	0.17	0.307927	88.1	78.1	12378	13024.7	14489.7	11542.4	11156.6	13093	11228.5	11327.5	133.5	8890.2	10682.4	12624.6
High	Master Protein	P38712	ATP-dependent rRNA helicase RRP3 OS=Saccharomyces cerevisiae (strain ATCC 204508 / S288c) OX=559292 GN=RRP3 PE=1 SV=2	1.262	0.34	0.0379549	110.2	87.2	29726.9	29633	24529.2	23525	23472.1	23292.7	26966.3	25771.7	226	18119.6	22474.6	22459.4
High	Master Protein	P39104	Phosphatidylinositol 4-kinase PIK1 OS=Saccharomyces cerevisiae (strain ATCC 204508 / S288c) OX=559292 GN=PIK1 PE=1 SV=1	1.063	0.09	0.976987	108.3	101.8	6729	6913.3	4941.8	6618.9	6328	6085.9	6104.1	6012.4	45.5	5098.1	6059.1	5868.2
High	Master Protein	Q06625	Glycogen debranching enzyme OS=Saccharomyces cerevisiae (strain ATCC 204508 / S288c) OX=559292 GN=GDB1 PE=1 SV=1	2.372	1.25	0.0276608	129.4	54.6	13089.8	13460.4	6845.3	5434.3	5518.6	5900.5	11874.2	11706.4	63.1	4185.7	5284	5689.4
High	Master Protein	P25555	Single-strand telomeric DNA-binding protein GBP2 OS=Saccharomyces cerevisiae (strain ATCC 204508 / S288c) OX=559292 GN=GBP2 PE=1 SV=1	1.378	0.46	0.178095	128.3	93.1	21745.9	22154.5	73642.9	15479.1	16075.1	16684	19726.5	19267.6	678.6	11922.5	15392	16087.1
High	Master Protein	P09032	Translation initiation factor eIF-2B subunit gamma OS=Saccharomyces cerevisiae (strain ATCC 204508 / S288c) OX=559292 GN=GCD1 PE=1 SV=3	1.004	0.01	0.996566	95	94.6	12890.8	13367.9	12936.6	12865.4	13204.5	12885.7	11693.7	11625.9	119.2	9909.3	12643.4	12424.7
High	Master Protein	P42940	Probable electron transfer flavoprotein subunit beta OS=Saccharomyces cerevisiae (strain ATCC 204508 / S288c) OX=559292 GN=CIR1 PE=1 SV=1	1.171	0.23	0.00770342	94.9	81.1	20661	21561.1	23938.2	18737.5	18416.2	17506.1	18742.3	18751.6	220.6	14432.1	17633.6	16879.8
High	Master Protein	P38694	Putative aldehyde dehydrogenase-like protein YHR039C OS=Saccharomyces cerevisiae (strain ATCC 204508 / S288c) OX=559292 GN=MSC7 PE=1 SV=1	1.197	0.26	0.012492	110.4	92.2	20447.7	20483.6	18714	17082.8	17397.9	16386.4	18548.8	17814.4	172.5	13157.6	16658.5	15800.2
High	Master Protein	P0CX21	Y' element ATP-dependent helicase protein 1 copy 5 OS=Saccharomyces cerevisiae (strain ATCC 204508 / S288c) OX=559292 GN=YRF1-5 PE=2 SV=1	1.219	0.29	0.717379	112.6	92.4	128.5	133.7	3.9	112	98.4	105.4	116.5	116.2	0	86.2	94.2	101.6
High	Master Protein	P47108	Nucleolar pre-ribosomal-associated protein 2 OS=Saccharomyces cerevisiae (strain ATCC 204508 / S288c) OX=559292 GN=URB2 PE=1 SV=1	0.959	-0.06	0.762962	99.7	103.9	12787.5	13424.2	14750.9	14820.6	13996.6	13937.5	11600	11674.9	135.9	11415.2	13401.7	13438.9
High	Master Protein	P53295	Ribosome-interacting GTPase 2 OS=Saccharomyces cerevisiae (strain ATCC 204508 / S288c) OX=559292 GN=RBG2 PE=1 SV=1	1.249	0.32	0.359889	113.1	90.6	27993.5	27055	20389.1	21668.6	21634	21962.3	25393.9	23529.6	187.9	16689.8	20714.5	21176.6
High	Master Protein	Q03103	Endoplasmic oxidoreductin-1 OS=Saccharomyces cerevisiae (strain ATCC 204508 / S288c) OX=559292 GN=ERO1 PE=1 SV=1	1.352	0.44	0.0652061	108.9	80.5	24871.1	25319.3	19152.3	17599.9	19166	18389.8	22561.4	22020	176.5	13556	18351.5	17731.9
High	Master Protein	P13185	Serine/threonine protein kinase KIN1 OS=Saccharomyces cerevisiae (strain ATCC 204508 / S288c) OX=559292 GN=KIN1 PE=1 SV=3	1.146	0.2	0.0370826	102	89	7949	8399.6	9490.3	7287.3	7330.2	7441.5	7210.8	7305	87.5	5612.9	7018.6	7175.2
High	Master Protein	P29952	Mannose-6-phosphate isomerase OS=Saccharomyces cerevisiae (strain ATCC 204508 / S288c) OX=559292 GN=PMI40 PE=1 SV=4	1.022	0.03	0.945238	94.2	92.2	56208.7	56237.8	54522.4	52565.8	55005.7	56790.2	50988.8	48909.6	502.4	40487.6	52668	54758.5
High	Master Protein	Q12690	60S ribosomal protein L13-A OS=Saccharomyces cerevisiae (strain ATCC 204508 / S288c) OX=559292 GN=RPL13A PE=1 SV=1	0.568	-0.82	0.0485309	71	125.1	489.1	559.4	274.8	696.9	958.6	861.4	443.7	486.5	2.5	536.8	917.9	830.6
High	Master Protein	P26321	60S ribosomal protein L5 OS=Saccharomyces cerevisiae (strain ATCC 204508 / S288c) OX=559292 GN=RPL5 PE=1 SV=4	0.882	-0.18	0.0807673	99.1	112.4	116032	114515	87920.4	129214	139947	129908	105256	99593	810.2	99523.7	134000	125260
High	Master Protein	P40093	MYG1 protein YER156C OS=Saccharomyces cerevisiae (strain ATCC 204508 / S288c) OX=559292 GN=YER156C PE=1 SV=1	0.907	-0.14	0.0651193	91.1	100.5	39064.7	37183.5	41266	45782.1	43075.4	42094.7	35436.9	32338.2	380.3	35262.6	41244.8	40588.7
High	Master Protein	P06782	Carbon catabolite-derepressing protein kinase OS=Saccharomyces cerevisiae (strain ATCC 204508 / S288c) OX=559292 GN=SNF1 PE=1 SV=1	1.099	0.14	0.177699	102.2	93	14011.4	14601.2	12727.9	12753.8	12890.5	12375	12710.2	12698.5	117.3	9823.3	12342.7	11932.3
High	Master Protein	P53327	Antiviral helicase SLH1 OS=Saccharomyces cerevisiae (strain ATCC 204508 / S288c) OX=559292 GN=SLH1 PE=1 SV=2	1.104	0.14	0.21958	104.2	94.4	5721.6	6042.8	7394.6	5531	5472.5	5454.6	5190.2	5255.4	68.1	4260.2	5240	5259.5
High	Master Protein	P09880	tRNA ligase OS=Saccharomyces cerevisiae (strain ATCC 204508 / S288c) OX=559292 GN=TRL1 PE=1 SV=1	0.863	-0.21	0.649247	93.8	108.7	10642.8	10590.8	13103.9	12454.3	12337.8	11792.3	9654.5	9210.8	120.8	9592.6	11813.4	11370.4
High	Master Protein	P29496	Minichromosome maintenance protein 5 OS=Saccharomyces cerevisiae (strain ATCC 204508 / S288c) OX=559292 GN=MCM5 PE=1 SV=1	1.178	0.24	0.00082649	107.3	91.1	13027	13171	14151.3	11180.8	11398.4	10960.4	11817.2	11454.8	130.4	8611.7	10914	10568.3
High	Master Protein	P39958	Rab GDP-dissociation inhibitor OS=Saccharomyces cerevisiae (strain ATCC 204508 / S288c) OX=559292 GN=GDI1 PE=1 SV=1	0.905	-0.14	0.138936	95.8	105.9	25083.1	25513.6	28024	27757.6	28737	28188.7	22753.7	22189	258.2	21379.7	27515.7	27180.2
High	Master Protein	P53008	Mannosyl-oligosaccharide glucosidase OS=Saccharomyces cerevisiae (strain ATCC 204508 / S288c) OX=559292 GN=CWH41 PE=1 SV=1	0.876	-0.19	0.0805716	92.4	105.5	12053.3	12540.3	13999.2	14213.7	14684	14315.3	10934	10906.2	129	10947.8	14060	13803.1
High	Master Protein	P25605	Acetolactate synthase small subunit, mitochondrial OS=Saccharomyces cerevisiae (strain ATCC 204508 / S288c) OX=559292 GN=ILV6 PE=1 SV=2	1.486	0.57	0.187561	128.9	86.8	39041.8	38220.7	24755.2	25790.5	25454.9	25725.4	35416.2	33240.3	228.1	19864.5	24373.1	24805.1
High	Master Protein	Q04264	Sister chromatid cohesion protein PDS5 OS=Saccharomyces cerevisiae (strain ATCC 204508 / S288c) OX=559292 GN=PDS5 PE=1 SV=1	1.064	0.09	0.287877	101.7	95.5	10239	10789.2	12106.7	10137.2	9793.2	10145.4	9288.1	9383.3	111.6	7807.9	9377	9782.5
High	Master Protein	P33755	Nuclear protein localization protein 4 OS=Saccharomyces cerevisiae (strain ATCC 204508 / S288c) OX=559292 GN=NPL4 PE=1 SV=1	1.246	0.32	5.90388e-05	108.2	86.8	11293.8	11893.7	11336.1	9092.4	9483.1	9096.6	10244.9	10343.9	104.5	7003.2	9080.1	8771.2
High	Master Protein	Q01163	37S ribosomal protein S23, mitochondrial OS=Saccharomyces cerevisiae (strain ATCC 204508 / S288c) OX=559292 GN=RSM23 PE=1 SV=3	1.18	0.24	0.0612788	104.7	88.8	14112.8	15730.1	17294.4	13333.4	13781.7	13296.1	12802.2	13680.4	159.4	10269.7	13196	12820.4
High	Master Protein	P38260	Hsp70 nucleotide exchange factor FES1 OS=Saccharomyces cerevisiae (strain ATCC 204508 / S288c) OX=559292 GN=FES1 PE=1 SV=1	0.995	-0.01	0.919453	100	100.5	18357.5	18925.3	21921.4	19555.7	19024.4	18541.3	16652.7	16459.2	202	15062.3	18215.9	17878
High	Master Protein	P21538	DNA-binding protein REB1 OS=Saccharomyces cerevisiae (strain ATCC 204508 / S288c) OX=559292 GN=REB1 PE=1 SV=2	0.937	-0.09	0.216832	95.3	101.8	11439.4	12296.2	11041.5	12167.2	12211.6	12411.5	10377.1	10693.9	101.7	9371.5	11692.7	11967.5
High	Master Protein	P04786	DNA topoisomerase 1 OS=Saccharomyces cerevisiae (strain ATCC 204508 / S288c) OX=559292 GN=TOP1 PE=1 SV=2	1.02	0.03	0.42017	103.1	101.1	13598.3	13230.4	14804.2	13129	13376.4	13327.2	12335.5	11506.4	136.4	10112.3	12807.9	12850.4
High	Master Protein	P25293	Nucleosome assembly protein OS=Saccharomyces cerevisiae (strain ATCC 204508 / S288c) OX=559292 GN=NAP1 PE=1 SV=2	0.909	-0.14	0.89672	102.3	112.5	21533.4	21981.3	26561.1	23060.1	24177.7	25262.1	19533.6	19117	244.8	17761.5	23150.1	24358.3
High	Master Protein	Q12149	Exosome complex exonuclease RRP6 OS=Saccharomyces cerevisiae (strain ATCC 204508 / S288c) OX=559292 GN=RRP6 PE=1 SV=1	0.94	-0.09	0.712859	96.5	102.7	14535	14568.2	34283.9	15707.9	15503.9	14761.3	13185.1	12669.8	315.9	12098.6	14845	14233.2
High	Master Protein	P09232	Cerevisin OS=Saccharomyces cerevisiae (strain ATCC 204508 / S288c) OX=559292 GN=PRB1 PE=1 SV=1	1.888	0.92	4.49192e-07	97.1	51.4	43030.8	45609.8	42821.3	22978.4	21612.2	22787.6	39034.7	39666.5	394.6	17698.6	20693.7	21972.4
High	Master Protein	Q08412	Ubiquitin-binding protein CUE5 OS=Saccharomyces cerevisiae (strain ATCC 204508 / S288c) OX=559292 GN=CUE5 PE=1 SV=1	1.315	0.4	0.01822	119.7	91	22568.8	25502	19299.7	17157.6	16634.2	17453.1	20472.9	22179	177.9	13215.2	15927.3	16828.7
High	Master Protein	P32468	Cell division control protein 12 OS=Saccharomyces cerevisiae (strain ATCC 204508 / S288c) OX=559292 GN=CDC12 PE=1 SV=1	0.966	-0.05	0.999529	96.1	99.5	23987	24554.4	28185.8	26009.4	25417.7	24788.7	21759.4	21354.8	259.7	20033.2	24337.5	23901.9
High	Master Protein	P53890	Bud neck protein 5 OS=Saccharomyces cerevisiae (strain ATCC 204508 / S288c) OX=559292 GN=BNI5 PE=1 SV=1	1.022	0.03	0.843724	110.9	108.6	11429.6	11747.1	11642.7	11394.7	10936.9	11881.9	10368.2	10216.3	107.3	8776.5	10472.1	11456.8
High	Master Protein	P32264	Glutamate 5-kinase OS=Saccharomyces cerevisiae (strain ATCC 204508 / S288c) OX=559292 GN=PRO1 PE=1 SV=2	0.895	-0.16	0.999053	89.2	99.6	16489.4	17008.1	25701.3	18839.3	19276.3	18993.9	14958.1	14791.8	236.8	14510.6	18457.1	18314.4
High	Master Protein	P15992	Heat shock protein 26 OS=Saccharomyces cerevisiae (strain ATCC 204508 / S288c) OX=559292 GN=HSP26 PE=1 SV=3	1.557	0.64	0.0572183	61.7	39.6	29105.9	30734.6	64701	22672.8	18213.4	19734.6	26402.9	26729.7	596.2	17463.2	17439.4	19028.6
High	Master Protein	P33399	La protein homolog OS=Saccharomyces cerevisiae (strain ATCC 204508 / S288c) OX=559292 GN=LHP1 PE=1 SV=2	0.838	-0.26	0.200617	92.1	109.9	29418.2	28682.5	35572.6	35110.7	34667.1	35323.2	26686.2	24945	327.8	27043.2	33193.8	34059.5
High	Master Protein	P0CX55	40S ribosomal protein S18-A OS=Saccharomyces cerevisiae (strain ATCC 204508 / S288c) OX=559292 GN=RPS18A PE=1 SV=1	0.863	-0.21	0.416855	96	111.2	161165	159319	196944	186728	185766	189750	146199	138558	1814.9	143823	177871	182961
High	Master Protein	P53319	6-phosphogluconate dehydrogenase, decarboxylating 2 OS=Saccharomyces cerevisiae (strain ATCC 204508 / S288c) OX=559292 GN=GND2 PE=1 SV=1	1.231	0.3	0.199682	80.9	65.7	1887.1	2188.1	3347.1	1854	1776.9	1722.8	1711.8	1903	30.8	1428	1701.3	1661.2
High	Master Protein	P53734	ATP-dependent RNA helicase DBP6 OS=Saccharomyces cerevisiae (strain ATCC 204508 / S288c) OX=559292 GN=DBP6 PE=1 SV=1	0.773	-0.37	0.973702	84.9	109.9	6424.3	6710.8	22000.3	8684.7	8827.5	8431.5	5827.7	5836.3	202.7	6689.2	8452.3	8129.8
High	Master Protein	P46982	Alpha-1,2-mannosyltransferase MNN5 OS=Saccharomyces cerevisiae (strain ATCC 204508 / S288c) OX=559292 GN=MNN5 PE=1 SV=2	1.295	0.37	0.0001252	109.5	84.6	20312.4	18975.1	20784.1	15892	15690.3	15221.4	18426.1	16502.6	191.5	12240.5	15023.5	14676.9
High	Master Protein	Q03104	Meiotic sister chromatid recombination protein 1 OS=Saccharomyces cerevisiae (strain ATCC 204508 / S288c) OX=559292 GN=MSC1 PE=1 SV=1	2.004	1	1.06851e-05	91	45.4	15012.9	15493.4	18511.9	7942.4	7730.5	7676.2	13618.7	13474.5	170.6	6117.5	7402	7401.6
High	Master Protein	P25037	Ubiquitin carboxyl-terminal hydrolase 1 OS=Saccharomyces cerevisiae (strain ATCC 204508 / S288c) OX=559292 GN=UBP1 PE=1 SV=2	1.19	0.25	0.000291361	112.1	94.2	14525.5	13788.3	14032.2	11781.7	11788.1	12074	13176.6	11991.6	129.3	9074.6	11287.1	11642
High	Master Protein	P53141	Myosin light chain 1 OS=Saccharomyces cerevisiae (strain ATCC 204508 / S288c) OX=559292 GN=MLC1 PE=1 SV=1	1.473	0.56	0.00722323	110.2	74.8	70648.9	79398.5	60147.4	47971.9	42148	48459.5	64088	69052.3	554.3	36949.3	40356.8	46725.9
High	Master Protein	P39729	Ribosome-interacting GTPase 1 OS=Saccharomyces cerevisiae (strain ATCC 204508 / S288c) OX=559292 GN=RBG1 PE=1 SV=1	0.957	-0.06	0.918129	90.3	94.4	28224	28515.4	31842.6	29793.6	29688.8	30791.1	25602.9	24799.6	293.4	22947.9	28427	29689.5
High	Master Protein	Q00772	Mitogen-activated protein kinase SLT2/MPK1 OS=Saccharomyces cerevisiae (strain ATCC 204508 / S288c) OX=559292 GN=SLT2 PE=1 SV=2	1.681	0.75	0.0472211	108.2	64.3	17124.8	18921	11123.8	10476.5	10186	9364.4	15534.4	16455.5	102.5	8069.3	9753.1	9029.4
High	Master Protein	P50109	Protein PSP2 OS=Saccharomyces cerevisiae (strain ATCC 204508 / S288c) OX=559292 GN=PSP2 PE=1 SV=2	0.998	0	0.873923	89.4	89.6	10022.2	10322.5	9917.2	10174.5	10043	9669.8	9091.4	8977.4	91.4	7836.7	9616.2	9323.8
High	Master Protein	Q08977	Cu(2+) suppressing and bleomycin sensitive protein 1 OS=Saccharomyces cerevisiae (strain ATCC 204508 / S288c) OX=559292 GN=CUB1 PE=1 SV=1	1.362	0.45	0.019026	110.5	81.1	24005.9	25345.4	19420.1	17906.1	17619.7	17406.4	21776.6	22042.7	179	13791.7	16870.9	16783.7
High	Master Protein	P27809	Glycolipid 2-alpha-mannosyltransferase OS=Saccharomyces cerevisiae (strain ATCC 204508 / S288c) OX=559292 GN=KRE2 PE=1 SV=1	0.701	-0.51	0.00943095	81.9	116.8	29912.5	27970.6	37179.4	44428.5	42643.3	42203.7	27134.6	24325.8	342.6	34220	40831.1	40693.9
High	Master Protein	P36139	Protein PET10 OS=Saccharomyces cerevisiae (strain ATCC 204508 / S288c) OX=559292 GN=PET10 PE=1 SV=3	2.483	1.31	0.00607744	126.5	51	66731.9	67370	37863.5	26878.6	26877.1	26239.3	60534.7	58591.2	348.9	20702.6	25734.9	25300.6
High	Master Protein	P38883	Pre-rRNA-processing protein RIX1 OS=Saccharomyces cerevisiae (strain ATCC 204508 / S288c) OX=559292 GN=RIX1 PE=1 SV=2	0.862	-0.21	0.96174	95.7	110.9	9151	9471.3	12736.1	11192.5	10984.7	10187	8301.2	8237.2	117.4	8620.8	10517.9	9822.5
High	Master Protein	P0CX31	40S ribosomal protein S24-A OS=Saccharomyces cerevisiae (strain ATCC 204508 / S288c) OX=559292 GN=RPS24A PE=1 SV=1	0.782	-0.35	0.0016865	93.4	119.4	208406	205952	210294	253467	266492	270798	189052	179115	1937.9	195227	255167	261110
High	Master Protein	Q06151	m7GpppX diphosphatase OS=Saccharomyces cerevisiae (strain ATCC 204508 / S288c) OX=559292 GN=DCS1 PE=1 SV=1	1.302	0.38	0.00136088	103.1	79.2	16957.5	18601	19783.6	14424.4	14282.5	14259.5	15382.7	16177.2	182.3	11110	13675.5	13749.3
High	Master Protein	P19812	E3 ubiquitin-protein ligase UBR1 OS=Saccharomyces cerevisiae (strain ATCC 204508 / S288c) OX=559292 GN=UBR1 PE=1 SV=1	0.903	-0.15	0.129987	95.6	105.8	8156.9	8502	7551.1	9029.3	9094.7	8608.8	7399.4	7394.1	69.6	6954.6	8708.2	8300.8
High	Master Protein	P38630	Replication factor C subunit 1 OS=Saccharomyces cerevisiae (strain ATCC 204508 / S288c) OX=559292 GN=RFC1 PE=1 SV=1	0.867	-0.21	0.990772	92.9	107.1	8751.8	9348.7	14239.2	10776.9	11140.3	10764.1	7939	8130.5	131.2	8300.7	10666.9	10379.1
High	Master Protein	P0CX46	60S ribosomal protein L2-B OS=Saccharomyces cerevisiae (strain ATCC 204508 / S288c) OX=559292 GN=RPL2B PE=1 SV=1	0.95	-0.07	0.668859	100.7	106	147117	137019	97430.2	144232	135680	146301	133454	119164	897.8	111091	129914	141067
High	Master Protein	P10080	Single-stranded nucleic acid-binding protein OS=Saccharomyces cerevisiae (strain ATCC 204508 / S288c) OX=559292 GN=SBP1 PE=1 SV=2	1.06	0.08	0.268677	96.8	91.4	39116	38730	40334.8	38827.2	36617.4	36914.1	35483.4	33683.2	371.7	29905.8	35061.2	35593.5
High	Master Protein	P20676	Nucleoporin NUP1 OS=Saccharomyces cerevisiae (strain ATCC 204508 / S288c) OX=559292 GN=NUP1 PE=1 SV=1	0.798	-0.32	0.04192	86.4	108.2	8087.3	8393.1	9921.9	10512.1	10893.8	10314.1	7336.2	7299.4	91.4	8096.7	10430.8	9945.1
High	Master Protein	P38295	Medium-chain fatty acid ethyl ester synthase/esterase 2 OS=Saccharomyces cerevisiae (strain ATCC 204508 / S288c) OX=559292 GN=EHT1 PE=1 SV=1	1.056	0.08	0.103451	89.2	84.5	21345.3	20514	20252.1	19923.7	19422	18406.4	19363	17840.9	186.6	15345.8	18596.6	17747.9
High	Master Protein	P40368	Nucleoporin NUP82 OS=Saccharomyces cerevisiae (strain ATCC 204508 / S288c) OX=559292 GN=NUP82 PE=1 SV=2	1.087	0.12	0.0215258	104.3	96	13155.5	13479.8	12650.2	12162.1	12101.9	11784.8	11933.8	11723.3	116.6	9367.6	11587.6	11363.2
High	Master Protein	P07278	cAMP-dependent protein kinase regulatory subunit OS=Saccharomyces cerevisiae (strain ATCC 204508 / S288c) OX=559292 GN=BCY1 PE=1 SV=4	1.281	0.36	5.78458e-05	101	78.8	36960.9	37938	40320.6	29827.3	29549.4	29613.6	33528.5	32994.4	371.6	22973.8	28293.6	28554.1
High	Master Protein	P39003	High-affinity hexose transporter HXT6 OS=Saccharomyces cerevisiae (strain ATCC 204508 / S288c) OX=559292 GN=HXT6 PE=1 SV=2	2.255	1.17	0.327693	92.1	40.9	147.9	144.6	56.1	64.1	74.1	62.3	134.2	125.7	0.5	49.4	70.9	60.1
High	Master Protein	P33750	Protein SOF1 OS=Saccharomyces cerevisiae (strain ATCC 204508 / S288c) OX=559292 GN=SOF1 PE=1 SV=1	0.953	-0.07	0.983303	94.6	99.3	16799.7	16885.2	18964.6	17445.6	18063.3	17725.7	15239.6	14684.9	174.8	13437	17295.6	17091.5
High	Master Protein	P0CX53	60S ribosomal protein L12-A OS=Saccharomyces cerevisiae (strain ATCC 204508 / S288c) OX=559292 GN=RPL12A PE=1 SV=1	1.065	0.09	0.837533	107.7	101.2	132344	134295	83908.4	123259	124325	135814	120054	116795	773.2	94937.4	119041	130955
High	Master Protein	P40498	U3 small nucleolar RNA-associated protein 25 OS=Saccharomyces cerevisiae (strain ATCC 204508 / S288c) OX=559292 GN=UTP25 PE=1 SV=1	1.007	0.01	0.670417	102.8	102.1	11711	12068.9	14043.5	11980.4	12078.2	11593.4	10623.4	10496.2	129.4	9227.6	11564.9	11178.6
High	Master Protein	P38323	ATP-dependent clpX-like chaperone, mitochondrial OS=Saccharomyces cerevisiae (strain ATCC 204508 / S288c) OX=559292 GN=MCX1 PE=1 SV=1	1.051	0.07	0.192396	100.8	95.9	7586	7874.1	7813.4	7435.4	7613.5	7238.7	6881.5	6848	72	5727	7290	6979.7
High	Master Protein	P32591	SWI/SNF complex subunit SWI3 OS=Saccharomyces cerevisiae (strain ATCC 204508 / S288c) OX=559292 GN=SWI3 PE=1 SV=1	0.789	-0.34	0.115026	89.7	113.7	9408.6	9116.1	11920.5	12428.6	11745.5	11926.9	8534.9	7928.2	109.9	9572.8	11246.3	11500.2
High	Master Protein	Q04322	Probable GTPase-activating protein GYL1 OS=Saccharomyces cerevisiae (strain ATCC 204508 / S288c) OX=559292 GN=GYL1 PE=1 SV=1	1.187	0.25	0.00813234	104	87.6	7431	7951.8	8119.6	6930.2	6698.2	6631.3	6740.9	6915.6	74.8	5337.8	6413.5	6394
High	Master Protein	P33201	Ribosome assembly factor MRT4 OS=Saccharomyces cerevisiae (strain ATCC 204508 / S288c) OX=559292 GN=MRT4 PE=1 SV=1	1.054	0.08	0.827345	94.6	89.7	48575.6	42839.8	37462.7	39791.1	41271	40635.5	44064.6	37257.5	345.2	30648.2	39517.1	39181.8
High	Master Protein	P36114	IML2-like protein YKR018C OS=Saccharomyces cerevisiae (strain ATCC 204508 / S288c) OX=559292 GN=YKR018C PE=1 SV=1	1.085	0.12	0.0960369	97.8	90.2	11839.6	12243	11581.1	11081.3	10536.3	10912.7	10740.1	10647.7	106.7	8535.1	10088.5	10522.3
High	Master Protein	Q12230	Sphingolipid long chain base-responsive protein LSP1 OS=Saccharomyces cerevisiae (strain ATCC 204508 / S288c) OX=559292 GN=LSP1 PE=1 SV=1	1.407	0.49	0.260942	115.8	82.3	70071.5	76245.6	47957.5	49791.4	48190.6	54146.1	63564.2	66310.3	441.9	38350.7	46142.5	52209
High	Master Protein	P14747	Serine/threonine-protein phosphatase 2B catalytic subunit A2 OS=Saccharomyces cerevisiae (strain ATCC 204508 / S288c) OX=559292 GN=CMP2 PE=1 SV=2	1.821	0.86	0.0482147	128.5	70.6	21992.2	22320.2	13370.8	12608.2	11862.9	12079.6	19949.9	19411.7	123.2	9711.2	11358.8	11647.5
High	Master Protein	P36000	AP-1 complex subunit beta-1 OS=Saccharomyces cerevisiae (strain ATCC 204508 / S288c) OX=559292 GN=APL2 PE=1 SV=1	0.951	-0.07	0.977538	95.4	100.3	9531.2	9885.2	10735.1	10521.5	10398.4	9680.3	8646.1	8597.1	98.9	8103.9	9956.5	9334
High	Master Protein	Q04491	Protein transport protein SEC13 OS=Saccharomyces cerevisiae (strain ATCC 204508 / S288c) OX=559292 GN=SEC13 PE=1 SV=1	0.967	-0.05	0.24013	88.1	91.1	34200.9	34695.9	35918.7	37257.9	35392.4	35894.7	31024.8	30174.8	331	28697.1	33888.3	34610.6
High	Master Protein	P0CX41	60S ribosomal protein L23-A OS=Saccharomyces cerevisiae (strain ATCC 204508 / S288c) OX=559292 GN=RPL23A PE=1 SV=1	0.659	-0.6	0.407751	80.2	121.7	117192	117331	200092	182271	177964	168962	106309	102042	1843.9	140390	170401	162918
High	Master Protein	P32379	Proteasome subunit alpha type-5 OS=Saccharomyces cerevisiae (strain ATCC 204508 / S288c) OX=559292 GN=PUP2 PE=1 SV=2	1.206	0.27	0.71733	114.6	95	67624.1	73304.9	49444.1	56057	51999.7	61214.1	61344.1	63752.8	455.6	43176.6	49789.8	59024.1
High	Master Protein	P32628	UV excision repair protein RAD23 OS=Saccharomyces cerevisiae (strain ATCC 204508 / S288c) OX=559292 GN=RAD23 PE=1 SV=1	0.819	-0.29	0.448884	97.1	118.6	23793.7	26100.9	34948.1	31879.8	30545.5	34298.6	21584.1	22699.8	322.1	24554.7	29247.4	33071.5
High	Master Protein	P48362	Protein HGH1 OS=Saccharomyces cerevisiae (strain ATCC 204508 / S288c) OX=559292 GN=HGH1 PE=1 SV=2	1.028	0.04	0.534386	99.3	96.6	16419.6	15924.1	23677.2	16073.4	15968.8	15915.9	14894.8	13849.1	218.2	12380.2	15290.2	15346.5
High	Master Protein	P40483	Putative zinc metalloproteinase YIL108W OS=Saccharomyces cerevisiae (strain ATCC 204508 / S288c) OX=559292 GN=YIL108W PE=1 SV=1	1.267	0.34	0.00338215	91.5	72.2	12927.5	14326.9	12387.1	11038.2	10200	10124.5	11726.9	12460	114.1	8501.9	9766.5	9762.3
High	Master Protein	Q12250	26S proteasome regulatory subunit RPN5 OS=Saccharomyces cerevisiae (strain ATCC 204508 / S288c) OX=559292 GN=RPN5 PE=1 SV=3	1.347	0.43	0.0337943	106.1	78.7	49754.2	46034.7	37516.6	36286.3	34175.7	33226.4	45133.7	40036.1	345.7	27948.7	32723.3	32037.7
High	Master Protein	P39985	rDNA transcriptional regulator POL5 OS=Saccharomyces cerevisiae (strain ATCC 204508 / S288c) OX=559292 GN=POL5 PE=1 SV=1	0.994	-0.01	0.866888	103.4	104	14203.2	13858.4	11975.7	13946	14159.7	13206.4	12884.2	12052.6	110.4	10741.6	13557.9	12734
High	Master Protein	P18562	Uracil phosphoribosyltransferase OS=Saccharomyces cerevisiae (strain ATCC 204508 / S288c) OX=559292 GN=FUR1 PE=1 SV=2	1.051	0.07	0.151722	105.3	100.2	71369.3	65696.9	68751.2	66093.6	65412.2	64801.9	64741.5	57136.2	633.6	50907.1	62632.3	62483.6
High	Master Protein	P40462	Protein TMA108 OS=Saccharomyces cerevisiae (strain ATCC 204508 / S288c) OX=559292 GN=TMA108 PE=1 SV=1	0.942	-0.09	0.557266	96.1	102	18301.3	19294.9	20535.1	20488.9	21042.6	19573.4	16601.7	16780.7	189.2	15781.1	20148.3	18873.1
High	Master Protein	Q00816	Resistance to glucose repression protein 1 OS=Saccharomyces cerevisiae (strain ATCC 204508 / S288c) OX=559292 GN=REG1 PE=1 SV=1	1.284	0.36	0.000403639	118	91.9	12439.9	13460.3	11714.3	9358.9	9689.3	9749.9	11284.7	11706.3	107.9	7208.5	9277.6	9401.1
High	Master Protein	P32381	Actin-related protein 2 OS=Saccharomyces cerevisiae (strain ATCC 204508 / S288c) OX=559292 GN=ARP2 PE=1 SV=1	1.241	0.31	0.00327761	103.4	83.3	26859.6	27403.5	31111.1	22925.5	22045.5	22078.7	24365.2	23832.6	286.7	17657.9	21108.6	21288.8
High	Master Protein	P52917	Vacuolar protein sorting-associated protein 4 OS=Saccharomyces cerevisiae (strain ATCC 204508 / S288c) OX=559292 GN=VPS4 PE=1 SV=1	1.408	0.49	3.96434e-05	122	86.7	8820.9	8893.4	8563.3	6481.1	6264.6	6025.4	8001.7	7734.5	78.9	4992	5998.4	5809.8
High	Master Protein	Q04697	Glucose-signaling factor 2 OS=Saccharomyces cerevisiae (strain ATCC 204508 / S288c) OX=559292 GN=GSF2 PE=1 SV=1	0.842	-0.25	0.0413574	83.4	99.1	25775	22765.4	21779.5	26235.8	27801.8	27032.7	23381.4	19798.9	200.7	20207.6	26620.3	26065.6
High	Master Protein	Q00711	Succinate dehydrogenase [ubiquinone] flavoprotein subunit, mitochondrial OS=Saccharomyces cerevisiae (strain ATCC 204508 / S288c) OX=559292 GN=SDH1 PE=1 SV=1	1.304	0.38	0.0461899	98	75.1	30069.3	32385.3	25187.6	24640.4	22810.2	23053.9	27276.9	28165.3	232.1	18978.7	21840.8	22229.1
High	Master Protein	P07246	Alcohol dehydrogenase 3, mitochondrial OS=Saccharomyces cerevisiae (strain ATCC 204508 / S288c) OX=559292 GN=ADH3 PE=1 SV=2	1.102	0.14	0.0800647	91.3	82.8	47583.1	44311.8	51042.4	43272	43167.2	41432.2	43164.3	38537.6	470.4	33329.3	41332.7	39949.9
High	Master Protein	Q99383	Nuclear polyadenylated RNA-binding protein 4 OS=Saccharomyces cerevisiae (strain ATCC 204508 / S288c) OX=559292 GN=HRP1 PE=1 SV=1	1.139	0.19	0.0202875	101.2	88.9	18178.2	17918.3	21444.6	16112.5	15961.5	15149.3	16490.1	15583.4	197.6	12410.3	15283.2	14607.4
High	Master Protein	P32873	GTPase-activating protein BEM3 OS=Saccharomyces cerevisiae (strain ATCC 204508 / S288c) OX=559292 GN=BEM3 PE=1 SV=3	0.99	-0.02	0.360028	98.5	99.5	4690.3	4692.5	4488.2	4949.4	4739.5	4732.9	4254.8	4081	41.4	3812.2	4538.1	4563.5
High	Master Protein	Q04336	Uncharacterized protein YMR196W OS=Saccharomyces cerevisiae (strain ATCC 204508 / S288c) OX=559292 GN=YMR196W PE=1 SV=1	1.66	0.73	7.9881e-05	104.1	62.7	8249	9576.8	9222.3	6046.6	5554.1	5541.8	7483	8328.9	85	4657.2	5318.1	5343.5
High	Master Protein	P33401	Phosphoglucomutase 1 OS=Saccharomyces cerevisiae (strain ATCC 204508 / S288c) OX=559292 GN=PGM1 PE=1 SV=1	0.607	-0.72	0.149246	71.6	118	12451.9	13045.1	21558.4	21475.9	21577.4	20465.1	11295.5	11345.3	198.7	16541.3	20660.4	19733
High	Master Protein	Q06639	Chromatin structure-remodeling complex protein RSC3 OS=Saccharomyces cerevisiae (strain ATCC 204508 / S288c) OX=559292 GN=RSC3 PE=1 SV=1	0.832	-0.26	0.471191	88	105.7	8830.2	9123.9	11421.2	10961	11154.3	10301.1	8010.1	7935	105.2	8442.5	10680.2	9932.5
High	Master Protein	P38787	2-dehydropantoate 2-reductase OS=Saccharomyces cerevisiae (strain ATCC 204508 / S288c) OX=559292 GN=PAN5 PE=1 SV=1	1.2	0.26	0.00513243	109.6	91.4	27145	27773.1	24969	22989.4	22624.3	22215.8	24624.1	24154.1	230.1	17707.1	21662.8	21421.1
High	Master Protein	Q05123	Actin-like protein ARP9 OS=Saccharomyces cerevisiae (strain ATCC 204508 / S288c) OX=559292 GN=ARP9 PE=1 SV=1	0.962	-0.06	0.9998	101.3	105.3	15105.7	14242.9	18147.6	16174.5	15706	15142.9	13702.9	12386.9	167.2	12458	15038.6	14601.2
High	Master Protein	Q01532	Cysteine proteinase 1, mitochondrial OS=Saccharomyces cerevisiae (strain ATCC 204508 / S288c) OX=559292 GN=LAP3 PE=1 SV=3	1.18	0.24	0.00835456	100.3	85	18902.9	20302	18874.8	16019.9	17303.5	15788.6	17147.4	17656.5	173.9	12339	16568.1	15223.7
High	Master Protein	Q02206	Chromatin structure-remodeling complex subunit RSC4 OS=Saccharomyces cerevisiae (strain ATCC 204508 / S288c) OX=559292 GN=RSC4 PE=1 SV=2	0.865	-0.21	0.717236	91	105.2	4467.3	4640.1	5799.2	5363.8	5448.5	5114.6	4052.4	4035.5	53.4	4131.3	5216.9	4931.7
High	Master Protein	P38701	40S ribosomal protein S20 OS=Saccharomyces cerevisiae (strain ATCC 204508 / S288c) OX=559292 GN=RPS20 PE=1 SV=3	0.891	-0.17	0.0588253	98.9	111	155647	145055	132571	160446	162787	173101	141193	126153	1221.7	123580	155868	166909
High	Master Protein	P22943	12 kDa heat shock protein OS=Saccharomyces cerevisiae (strain ATCC 204508 / S288c) OX=559292 GN=HSP12 PE=1 SV=1	4.871	2.28	0.00277778	102.7	21.1	162548	245944	83232.1	34012.8	29346.7	33372.7	147453	213896	767	26197.6	28099.5	32178.8
High	Master Protein	Q03496	tRNA (cytidine(32)-2'-O)-methyltransferase non-catalytic subunit TRM732 OS=Saccharomyces cerevisiae (strain ATCC 204508 / S288c) OX=559292 GN=TRM732 PE=1 SV=1	0.949	-0.08	0.68756	99.8	105.2	7473	7832.3	7189.3	8144	7876.5	7384.2	6779	6811.7	66.3	6272.7	7541.7	7120.1
High	Master Protein	P38132	DNA replication licensing factor MCM7 OS=Saccharomyces cerevisiae (strain ATCC 204508 / S288c) OX=559292 GN=MCM7 PE=1 SV=4	1.272	0.35	0.00744877	110.6	87	7778.2	7747.4	9646.3	6114.3	6070.2	6468.6	7055.8	6737.8	88.9	4709.4	5812.2	6237.2
High	Master Protein	P52488	Ubiquitin-activating enzyme E1-like OS=Saccharomyces cerevisiae (strain ATCC 204508 / S288c) OX=559292 GN=UBA2 PE=1 SV=1	1.218	0.28	0.000372397	107.6	88.3	10998.7	11017.8	10470.4	9182.7	9028.3	8605.9	9977.3	9582.1	96.5	7072.8	8644.6	8298.1
High	Master Protein	P38732	Protein-lysine N-methyltransferase EFM1 OS=Saccharomyces cerevisiae (strain ATCC 204508 / S288c) OX=559292 GN=EFM1 PE=1 SV=1	0.88	-0.18	0.856366	91.2	103.6	8729.2	9200.6	11537.8	10526.5	10456.6	9985.9	7918.6	8001.7	106.3	8107.8	10012.2	9628.7
High	Master Protein	P26786	40S ribosomal protein S7-A OS=Saccharomyces cerevisiae (strain ATCC 204508 / S288c) OX=559292 GN=RPS7A PE=1 SV=4	1.039	0.06	0.999999	115.3	111	66081.3	58408.1	69057.4	63580	63160.2	66523.7	59944.5	50797.2	636.4	48971.1	60476	64143.8
High	Master Protein	Q05931	Heat shock protein SSQ1, mitochondrial OS=Saccharomyces cerevisiae (strain ATCC 204508 / S288c) OX=559292 GN=SSQ1 PE=1 SV=1	1.18	0.24	0.104765	101.3	85.8	11808.8	12081.5	10178.4	10299.8	10005.9	9941	10712.2	10507.2	93.8	7933.2	9580.6	9585.4
High	Master Protein	Q06205	FK506-binding protein 4 OS=Saccharomyces cerevisiae (strain ATCC 204508 / S288c) OX=559292 GN=FPR4 PE=1 SV=1	1.165	0.22	0.244937	106	91	42134.7	37819.6	44399.5	36030.7	36155.9	40213.1	38221.8	32891.5	409.2	27751.8	34619.3	38774.5
High	Master Protein	Q12114	Chitin biosynthesis protein CHS5 OS=Saccharomyces cerevisiae (strain ATCC 204508 / S288c) OX=559292 GN=CHS5 PE=1 SV=1	1.224	0.29	0.241698	108.9	89	11883.5	12259.4	9335.6	9760.1	9705.4	9478.1	10779.9	10661.9	86	7517.5	9293	9139
High	Master Protein	P29465	Chitin synthase 3 OS=Saccharomyces cerevisiae (strain ATCC 204508 / S288c) OX=559292 GN=CHS3 PE=1 SV=3	0.926	-0.11	0.328432	87	93.9	6406.2	6866.7	5790.6	6915.5	7019.3	6760.4	5811.3	5971.9	53.4	5326.5	6721	6518.6
High	Master Protein	Q03281	Inner nuclear membrane protein HEH2 OS=Saccharomyces cerevisiae (strain ATCC 204508 / S288c) OX=559292 GN=HEH2 PE=1 SV=1	1.064	0.09	0.0424922	104.4	98.1	7770.7	7640.1	7286.8	7193.3	7048.9	7177.6	7049.1	6644.5	67.1	5540.5	6749.3	6920.8
High	Master Protein	P38174	Methionine aminopeptidase 2 OS=Saccharomyces cerevisiae (strain ATCC 204508 / S288c) OX=559292 GN=MAP2 PE=1 SV=4	1.378	0.46	0.22735	120	87.1	20027.7	20665.4	14342.8	14387.9	14537.4	15578.8	18167.8	17972.6	132.2	11082	13919.6	15021.4
High	Master Protein	P28834	Isocitrate dehydrogenase [NAD] subunit 1, mitochondrial OS=Saccharomyces cerevisiae (strain ATCC 204508 / S288c) OX=559292 GN=IDH1 PE=1 SV=2	1.328	0.41	0.107194	93	70	38148.8	41226	28798.3	28736.1	29194	26701.3	34606	35854	265.4	22133.3	27953.3	25746.1
High	Master Protein	P17649	4-aminobutyrate aminotransferase OS=Saccharomyces cerevisiae (strain ATCC 204508 / S288c) OX=559292 GN=UGA1 PE=1 SV=2	1.422	0.51	1.96299e-06	91.6	64.4	22918.6	23308.8	24682.8	16409.5	16389.6	15719.5	20790.3	20271.5	227.5	12639.1	15693	15157.2
High	Master Protein	P04456	60S ribosomal protein L25 OS=Saccharomyces cerevisiae (strain ATCC 204508 / S288c) OX=559292 GN=RPL25 PE=1 SV=4	0.735	-0.44	1.10831e-07	87.8	119.5	102612	102594	101753	139607	138416	140775	93083	89225.3	937.7	107529	132533	135739
High	Master Protein	P39517	ATP-dependent RNA helicase DHH1 OS=Saccharomyces cerevisiae (strain ATCC 204508 / S288c) OX=559292 GN=DHH1 PE=1 SV=1	1.809	0.86	0.027616	169.7	93.8	37504.5	38510.4	24452.8	20184.8	22463.9	20734.7	34021.6	33492.3	225.3	15546.9	21509.2	19992.9
High	Master Protein	P40557	ER-retained PMA1-suppressing protein 1 OS=Saccharomyces cerevisiae (strain ATCC 204508 / S288c) OX=559292 GN=EPS1 PE=1 SV=1	1.022	0.03	0.999942	101.3	99.1	9036	9004.8	8496.4	8811.4	8959.9	8726.9	8196.8	7831.4	78.3	6786.8	8579.1	8414.7
High	Master Protein	P36120	ATP-dependent RNA helicase DBP7 OS=Saccharomyces cerevisiae (strain ATCC 204508 / S288c) OX=559292 GN=DBP7 PE=1 SV=1	1.013	0.02	0.683985	101.5	100.1	9765.6	9888.8	12880.9	9620.6	9757.4	10361.9	8858.7	8600.2	118.7	7410.1	9342.7	9991.2
High	Master Protein	P33753	tRNA (uracil(54)-C(5))-methyltransferase OS=Saccharomyces cerevisiae (strain ATCC 204508 / S288c) OX=559292 GN=TRM2 PE=1 SV=2	0.918	-0.12	0.74711	96.1	104.7	11116.4	11124.1	12827	12401.9	11866.8	12112.6	10084	9674.5	118.2	9552.3	11362.5	11679.3
High	Master Protein	Q12363	Transcriptional modulator WTM1 OS=Saccharomyces cerevisiae (strain ATCC 204508 / S288c) OX=559292 GN=WTM1 PE=1 SV=1	1.216	0.28	0.367125	104.8	86.2	47901.7	46445.7	36511.7	37484.9	39011.7	38197.9	43453.2	40393.5	336.5	28871.9	37353.8	36831.4
High	Master Protein	P41832	Protein BNI1 OS=Saccharomyces cerevisiae (strain ATCC 204508 / S288c) OX=559292 GN=BNI1 PE=1 SV=3	0.88	-0.18	0.199481	94.7	107.7	3592.9	3597.2	2156.9	4083.2	4165.5	3931.4	3259.3	3128.5	19.9	3145	3988.5	3790.7
High	Master Protein	P53860	Phosphatidylinositol transfer protein PDR16 OS=Saccharomyces cerevisiae (strain ATCC 204508 / S288c) OX=559292 GN=PDR16 PE=1 SV=1	1.314	0.39	1.6537e-05	106.4	81	22151.7	22682.5	21612.7	16864	17144.5	16235.7	20094.5	19726.8	199.2	12989.1	16415.9	15654.9
High	Master Protein	Q08421	Enhancer of translation termination 1 OS=Saccharomyces cerevisiae (strain ATCC 204508 / S288c) OX=559292 GN=ETT1 PE=1 SV=1	0.979	-0.03	0.518489	101.6	103.8	16850.9	15560.2	16402.2	18056.3	16458.3	16747.6	15286	13532.6	151.1	13907.4	15758.9	16148.5
High	Master Protein	P14904	Vacuolar aminopeptidase 1 OS=Saccharomyces cerevisiae (strain ATCC 204508 / S288c) OX=559292 GN=APE1 PE=1 SV=2	1.31	0.39	1.23803e-05	98.5	75.2	29323.3	28848.1	29642.1	22301.8	23178.3	22377.1	26600.2	25089	273.2	17177.5	22193.2	21576.6
High	Master Protein	P32473	Pyruvate dehydrogenase E1 component subunit beta, mitochondrial OS=Saccharomyces cerevisiae (strain ATCC 204508 / S288c) OX=559292 GN=PDB1 PE=1 SV=2	0.835	-0.26	0.253115	90.1	107.9	26530.9	25625.1	31188	31997.4	31786.1	29497.4	24067.1	22286	287.4	24645.3	30435.2	28442.2
High	Master Protein	Q08818	Meiotic sister-chromatid recombination protein 6, mitochondrial OS=Saccharomyces cerevisiae (strain ATCC 204508 / S288c) OX=559292 GN=MSC6 PE=1 SV=1	1.289	0.37	0.0358666	109.9	85.2	10163.8	11581.1	8498.8	7907.3	7883.7	7648.5	9219.9	10072	78.3	6090.4	7548.6	7374.9
High	Master Protein	P40414	Tropomyosin-2 OS=Saccharomyces cerevisiae (strain ATCC 204508 / S288c) OX=559292 GN=TPM2 PE=1 SV=1	1.538	0.62	0.0563742	111.8	72.7	26061.8	34479.6	19544.2	16947.3	14976.7	17816	23641.5	29986.7	180.1	13053.2	14340.2	17178.6
High	Master Protein	P36101	tRNA threonylcarbamoyladenosine dehydratase 2 OS=Saccharomyces cerevisiae (strain ATCC 204508 / S288c) OX=559292 GN=TCD2 PE=1 SV=1	0.993	-0.01	0.732323	99.4	100.1	9709.3	9993.1	11807.1	10202	10061.7	9448.7	8807.6	8690.9	108.8	7857.9	9634.1	9110.6
High	Master Protein	P27472	Glycogen [starch] synthase isoform 2 OS=Saccharomyces cerevisiae (strain ATCC 204508 / S288c) OX=559292 GN=GSY2 PE=1 SV=3	1.727	0.79	5.42725e-06	107.3	62.1	20883.6	22970.6	19634.3	12291.8	12091.5	11832.7	18944.2	19977.4	180.9	9467.5	11577.6	11409.4
High	Master Protein	P00431	Cytochrome c peroxidase, mitochondrial OS=Saccharomyces cerevisiae (strain ATCC 204508 / S288c) OX=559292 GN=CCP1 PE=1 SV=2	1.115	0.16	0.085148	93.8	84.1	26442.4	27823.9	28756.7	26804	24821.4	24945.1	23986.8	24198.3	265	20645.2	23766.6	24052.7
High	Master Protein	P38623	Serine/threonine-protein kinase RCK2 OS=Saccharomyces cerevisiae (strain ATCC 204508 / S288c) OX=559292 GN=RCK2 PE=1 SV=3	1.251	0.32	0.00226028	110.2	88.1	18073.3	18342	18451.3	16265.1	14664.9	14604.6	16394.9	15951.9	170	12527.8	14041.6	14082.1
High	Master Protein	Q06839	PX domain-containing protein YPR097W OS=Saccharomyces cerevisiae (strain ATCC 204508 / S288c) OX=559292 GN=YPR097W PE=1 SV=2	1.192	0.25	0.0452695	114.6	96.1	11010.3	11445.6	15015	9201.3	9786.3	9605.1	9987.8	9954.2	138.4	7087.1	9370.4	9261.5
High	Master Protein	P87108	Mitochondrial import inner membrane translocase subunit TIM10 OS=Saccharomyces cerevisiae (strain ATCC 204508 / S288c) OX=559292 GN=TIM10 PE=1 SV=1	1.193	0.26	0.29395	107.8	90.4	38575.7	46050.8	33411.8	30685.8	32322.7	35668.5	34993.3	40050.1	307.9	23635.1	30949	34392.4
High	Master Protein	P40564	DnaJ-like protein 1 OS=Saccharomyces cerevisiae (strain ATCC 204508 / S288c) OX=559292 GN=DJP1 PE=1 SV=1	1.138	0.19	0.00313041	98.1	86.3	7948.8	8243.7	8464.7	7430.4	7246	7006.8	7210.6	7169.5	78	5723.1	6938	6756.2
High	Master Protein	Q04958	Lysophospholipase NTE1 OS=Saccharomyces cerevisiae (strain ATCC 204508 / S288c) OX=559292 GN=NTE1 PE=1 SV=1	1.21	0.27	0.293988	111	91.8	6708.6	6471.2	5219.6	5626.8	5349.5	5171.8	6085.6	5628	48.1	4333.9	5122.2	4986.7
High	Master Protein	P53551	Histone H1 OS=Saccharomyces cerevisiae (strain ATCC 204508 / S288c) OX=559292 GN=HHO1 PE=1 SV=1	1.843	0.88	0.00795079	131	71.1	29103.5	27502.6	24461.3	14925.1	14429.5	15792.2	26400.7	23918.8	225.4	11495.7	13816.3	15227.3
High	Master Protein	P05759	Ubiquitin-40S ribosomal protein S31 OS=Saccharomyces cerevisiae (strain ATCC 204508 / S288c) OX=559292 GN=RPS31 PE=1 SV=3	0.917	-0.13	0.176407	101.7	111	283174	286190	216859	308935	295271	342763	256876	248897	1998.4	237950	282722	330501
High	Master Protein	P13186	Serine/threonine-protein kinase KIN2 OS=Saccharomyces cerevisiae (strain ATCC 204508 / S288c) OX=559292 GN=KIN2 PE=1 SV=3	0.972	-0.04	0.766006	97	99.7	3250.8	3269.4	3423	4154.5	3288.3	3362.4	2948.9	2843.4	31.5	3199.9	3148.5	3242.1
High	Master Protein	P35729	Nucleoporin NUP120 OS=Saccharomyces cerevisiae (strain ATCC 204508 / S288c) OX=559292 GN=NUP120 PE=1 SV=1	0.885	-0.18	0.0891488	92.7	104.8	9817.4	10619.5	9386.4	11092.8	11478.9	10895.7	8905.7	9235.7	86.5	8544	10991.1	10505.9
High	Master Protein	Q02354	U3 small nucleolar RNA-associated protein 6 OS=Saccharomyces cerevisiae (strain ATCC 204508 / S288c) OX=559292 GN=UTP6 PE=1 SV=2	0.928	-0.11	0.556513	95.1	102.4	18146.9	18089.4	20064.9	19544.6	19236.1	20297.8	16461.6	15732.3	184.9	15053.8	18418.6	19571.7
High	Master Protein	P38112	ATP-dependent RNA helicase MAK5 OS=Saccharomyces cerevisiae (strain ATCC 204508 / S288c) OX=559292 GN=MAK5 PE=1 SV=1	1.015	0.02	0.776076	103	101.4	13158	14014.4	21102.9	13802	14643.9	13770.5	11936.1	12188.2	194.5	10630.7	14021.6	13277.9
High	Master Protein	Q99257	mRNA export factor MEX67 OS=Saccharomyces cerevisiae (strain ATCC 204508 / S288c) OX=559292 GN=MEX67 PE=1 SV=1	0.876	-0.19	0.99833	88.1	100.5	10309.6	10889.9	15630.1	12474.7	12426.1	11890.2	9352.2	9470.9	144	9608.3	11898	11464.9
High	Master Protein	P11325	Leucine--tRNA ligase, mitochondrial OS=Saccharomyces cerevisiae (strain ATCC 204508 / S288c) OX=559292 GN=NAM2 PE=1 SV=1	1.105	0.14	0.115134	100.5	90.9	4573.7	5265.8	4275.6	4138.4	4161.3	4011.2	4149	4579.7	39.4	3187.5	3984.4	3867.7
High	Master Protein	P25586	KRR1 small subunit processome component OS=Saccharomyces cerevisiae (strain ATCC 204508 / S288c) OX=559292 GN=KRR1 PE=1 SV=1	1.291	0.37	0.00326099	116.1	90	32575.2	31675.8	27787.8	24539.6	24552.7	23613.5	29550	27548.3	256.1	18901.1	23509.2	22768.7
High	Master Protein	P12904	5'-AMP-activated protein kinase subunit gamma OS=Saccharomyces cerevisiae (strain ATCC 204508 / S288c) OX=559292 GN=SNF4 PE=1 SV=1	1.01	0.01	0.957393	94	93	15685.4	16104.3	18209.2	17345.3	15943.6	15456.8	14228.7	14005.8	167.8	13359.8	15266.1	14903.8
High	Master Protein	Q08225	Probable dipeptidyl peptidase 3 OS=Saccharomyces cerevisiae (strain ATCC 204508 / S288c) OX=559292 GN=YOL057W PE=1 SV=1	0.954	-0.07	0.848032	93.6	98.2	13445.1	14167.3	18461.8	14918	12947.4	14856.9	12196.5	12321.2	170.1	11490.3	12397.1	14325.4
High	Master Protein	Q08773	ISWI chromatin-remodeling complex ATPase ISW2 OS=Saccharomyces cerevisiae (strain ATCC 204508 / S288c) OX=559292 GN=ISW2 PE=1 SV=1	0.859	-0.22	0.983852	90.2	105	4109.9	4246.7	6313.2	5331.5	4946.6	4691.2	3728.2	3693.3	58.2	4106.4	4736.4	4523.4
High	Master Protein	P12754	Translation initiation factor eIF-2B subunit delta OS=Saccharomyces cerevisiae (strain ATCC 204508 / S288c) OX=559292 GN=GCD2 PE=1 SV=1	1.163	0.22	0.122361	110.5	95	11731.8	11471.9	10073.2	10139.5	9862.1	9739.4	10642.3	9977.1	92.8	7809.7	9442.9	9391
High	Master Protein	P23293	Serine/threonine-protein kinase BUR1 OS=Saccharomyces cerevisiae (strain ATCC 204508 / S288c) OX=559292 GN=SGV1 PE=1 SV=1	1.245	0.32	0.00432149	116.9	93.9	9760.5	10195.7	8833.2	8043.5	7840	7539	8854	8867.2	81.4	6195.3	7506.8	7269.3
High	Master Protein	P53221	60S ribosomal protein L26-B OS=Saccharomyces cerevisiae (strain ATCC 204508 / S288c) OX=559292 GN=RPL26B PE=1 SV=2	0.805	-0.31	0.0273562	92.3	114.6	161614	152412	145371	189279	182642	202143	146605	132552	1339.6	145788	174880	194911
High	Master Protein	P27929	37S ribosomal protein NAM9, mitochondrial OS=Saccharomyces cerevisiae (strain ATCC 204508 / S288c) OX=559292 GN=NAM9 PE=1 SV=2	1.164	0.22	0.0311277	105.9	90.9	17777.2	19200.6	16113.1	15269.9	15482.7	15126.1	16126.3	16698.7	148.5	11761.3	14824.7	14585
High	Master Protein	P16451	Pyruvate dehydrogenase complex protein X component, mitochondrial OS=Saccharomyces cerevisiae (strain ATCC 204508 / S288c) OX=559292 GN=PDX1 PE=1 SV=1	1.235	0.3	0.608599	102.8	83.2	16751.5	16472	11750.8	13496.7	12862.4	13335.1	15195.9	14325.6	108.3	10395.5	12315.8	12858.1
High	Master Protein	P0CX85	60S ribosomal protein L35-B OS=Saccharomyces cerevisiae (strain ATCC 204508 / S288c) OX=559292 GN=RPL35B PE=1 SV=1	0.623	-0.68	0.00922742	79.5	127.5	114960	110336	151450	184424	191162	181785	104284	95958.1	1395.6	142049	183038	175282
High	Master Protein	Q06506	Ribosomal RNA-processing protein 9 OS=Saccharomyces cerevisiae (strain ATCC 204508 / S288c) OX=559292 GN=RRP9 PE=1 SV=1	1.013	0.02	0.665814	101.1	99.8	17558.4	17203.5	19170.9	17702.1	17182.1	17332.5	15927.8	14961.8	176.7	13634.7	16451.9	16712.5
High	Master Protein	Q12136	Something about silencing protein 10 OS=Saccharomyces cerevisiae (strain ATCC 204508 / S288c) OX=559292 GN=SAS10 PE=1 SV=1	1.011	0.02	0.995639	108.7	107.6	18605.8	18213.2	19952	20414	17307.4	18409.1	16878	15839.9	183.9	15723.4	16571.9	17750.5
High	Master Protein	Q08960	S-adenosyl-L-methionine-dependent tRNA 4-demethylwyosine synthase OS=Saccharomyces cerevisiae (strain ATCC 204508 / S288c) OX=559292 GN=TYW1 PE=1 SV=1	0.85	-0.23	0.529262	95.3	112	7978.3	7734.2	10192.8	10033	9383.8	9187	7237.4	6726.4	93.9	7727.7	8985	8858.3
High	Master Protein	P05738	60S ribosomal protein L9-A OS=Saccharomyces cerevisiae (strain ATCC 204508 / S288c) OX=559292 GN=RPL9A PE=1 SV=2	0.706	-0.5	0.00621286	84.4	119.6	115131	118239	143507	161821	170365	167581	104439	102832	1322.4	124639	163124	161585
High	Master Protein	P38075	Pyridoxamine 5'-phosphate oxidase OS=Saccharomyces cerevisiae (strain ATCC 204508 / S288c) OX=559292 GN=PDX3 PE=1 SV=1	1.357	0.44	4.55614e-05	104.2	76.8	33014.4	30327.7	29708.2	22355.3	22785	21911.6	29948.5	26375.8	273.8	17218.6	21816.7	21127.7
High	Master Protein	Q06488	Chromatin structure-remodeling complex subunit RSC2 OS=Saccharomyces cerevisiae (strain ATCC 204508 / S288c) OX=559292 GN=RSC2 PE=1 SV=1	0.989	-0.02	0.968211	100	101.2	6650.7	6885.1	7946.5	6952.2	7057.6	6965.1	6033.1	5987.9	73.2	5354.8	6757.7	6715.9
High	Master Protein	P38080	Serine/threonine-protein kinase AKL1 OS=Saccharomyces cerevisiae (strain ATCC 204508 / S288c) OX=559292 GN=AKL1 PE=1 SV=1	1.169	0.23	0.254176	103.8	88.8	7842	8392.2	15425.3	7177.1	7205.4	7177.8	7113.7	7298.7	142.1	5528	6899.2	6921
High	Master Protein	P40075	Vesicle-associated membrane protein-associated protein SCS2 OS=Saccharomyces cerevisiae (strain ATCC 204508 / S288c) OX=559292 GN=SCS2 PE=1 SV=3	0.942	-0.09	0.185858	92.1	97.8	21455.2	21715.7	20318.5	23196.8	22765.5	21826.4	19462.8	18886	187.2	17866.8	21798	21045.5
High	Master Protein	P32466	Low-affinity glucose transporter HXT3 OS=Saccharomyces cerevisiae (strain ATCC 204508 / S288c) OX=559292 GN=HXT3 PE=1 SV=1	0.458	-1.13	0.0229353	69.2	151.1	6190.3	5582.4	10715.3	13512.2	13927.9	12853.7	5615.4	4855	98.7	10407.5	13336	12393.9
High	Master Protein	P39968	Vacuolar protein 8 OS=Saccharomyces cerevisiae (strain ATCC 204508 / S288c) OX=559292 GN=VAC8 PE=1 SV=3	1.283	0.36	2.00617e-05	103.5	80.7	25688.9	26057.8	27635.2	20448.6	20315.2	20170.6	23303.3	22662.3	254.7	15750.1	19451.8	19449
High	Master Protein	Q12024	Ribosome biogenesis protein YTM1 OS=Saccharomyces cerevisiae (strain ATCC 204508 / S288c) OX=559292 GN=YTM1 PE=1 SV=1	1.095	0.13	0.063093	101.2	92.4	20622.7	20471.1	25008.8	18956	18834.2	18422.5	18707.5	17803.6	230.5	14600.4	18033.8	17763.4
High	Master Protein	P38264	SRP-independent targeting protein 3 OS=Saccharomyces cerevisiae (strain ATCC 204508 / S288c) OX=559292 GN=PHO88 PE=1 SV=1	0.802	-0.32	0.00819714	91	113.5	49219	43677.8	54262.8	61234.5	61346.8	61923.1	44648.2	37986.3	500	47164.5	58739.6	59707.8
High	Master Protein	Q06489	Methylthioribose-1-phosphate isomerase OS=Saccharomyces cerevisiae (strain ATCC 204508 / S288c) OX=559292 GN=MRI1 PE=1 SV=1	0.942	-0.09	0.215963	99.3	105.4	18226.7	18382.6	18493.8	18568.8	19752.1	19505.5	16534	15987.2	170.4	14302.2	18912.6	18807.7
High	Master Protein	P25343	Reduced viability upon starvation protein 161 OS=Saccharomyces cerevisiae (strain ATCC 204508 / S288c) OX=559292 GN=RVS161 PE=1 SV=1	1.55	0.63	0.0406507	121.2	78.2	51904.6	49769.3	35485.9	31516	32117.8	33825	47084.4	43284.1	327	24274.5	30752.8	32614.9
High	Master Protein	Q01560	Nucleolar protein 3 OS=Saccharomyces cerevisiae (strain ATCC 204508 / S288c) OX=559292 GN=NPL3 PE=1 SV=1	0.97	-0.04	0.349794	102.9	106.1	44366.4	44291.5	34798.1	44495.4	45651.3	47133.6	40246.2	38520	320.7	34271.6	43711.2	45447.3
High	Master Protein	P07281	40S ribosomal protein S19-B OS=Saccharomyces cerevisiae (strain ATCC 204508 / S288c) OX=559292 GN=RPS19B PE=1 SV=2	2.438	1.29	0.705706	144.2	59.1	7050.3	4001.9	837.3	1641.4	1255.8	2135.4	6395.6	3480.5	7.7	1264.3	1202.4	2059
High	Master Protein	Q08723	26S proteasome regulatory subunit RPN8 OS=Saccharomyces cerevisiae (strain ATCC 204508 / S288c) OX=559292 GN=RPN8 PE=1 SV=3	1.154	0.21	0.0025453	101.3	87.8	28329.5	27573.5	30261.6	24553.7	24226.6	25054.4	25698.6	23980.5	278.9	18911.9	23197	24158.1
High	Master Protein	P07280	40S ribosomal protein S19-A OS=Saccharomyces cerevisiae (strain ATCC 204508 / S288c) OX=559292 GN=RPS19A PE=1 SV=2	1.007	0.01	0.976285	104.9	104.2	191298	180939	147959	166396	179622	185880	173533	157362	1363.5	128162	171988	179230
High	Master Protein	P22023	Killer toxin-resistance protein 5 OS=Saccharomyces cerevisiae (strain ATCC 204508 / S288c) OX=559292 GN=KRE5 PE=1 SV=2	0.641	-0.64	0.738324	80.7	126.1	3299.4	3472	7511.5	5420.6	5554.6	5344.7	2993	3019.6	69.2	4175.1	5318.6	5153.5
High	Master Protein	P33202	Ubiquitin fusion degradation protein 4 OS=Saccharomyces cerevisiae (strain ATCC 204508 / S288c) OX=559292 GN=UFD4 PE=1 SV=1	1.088	0.12	0.763992	100.6	92.5	8097.5	8528.5	6824.7	7445.9	7472.2	7177.7	7345.5	7417.2	62.9	5735	7154.6	6920.9
High	Master Protein	Q12514	General negative regulator of transcription subunit 5 OS=Saccharomyces cerevisiae (strain ATCC 204508 / S288c) OX=559292 GN=NOT5 PE=1 SV=1	1.263	0.34	0.0038032	116.9	92.5	9838	9609.8	11393.4	8096.1	7505.8	7786.9	8924.4	8357.6	105	6235.8	7186.9	7508.3
High	Master Protein	P20485	Choline kinase OS=Saccharomyces cerevisiae (strain ATCC 204508 / S288c) OX=559292 GN=CKI1 PE=1 SV=1	1.354	0.44	3.50589e-05	117.9	87.1	8830.3	9508.5	9366.9	7022.9	6920.1	6769	8010.3	8269.4	86.3	5409.2	6626	6526.8
High	Master Protein	P51401	60S ribosomal protein L9-B OS=Saccharomyces cerevisiae (strain ATCC 204508 / S288c) OX=559292 GN=RPL9B PE=1 SV=1	0.61	-0.71	0.000119351	70.2	115.1	8262.6	8530.8	8823.4	15859	13978	13637.8	7495.3	7419.2	81.3	12215	13384	13149.9
High	Master Protein	P38879	Nascent polypeptide-associated complex subunit alpha OS=Saccharomyces cerevisiae (strain ATCC 204508 / S288c) OX=559292 GN=EGD2 PE=1 SV=3	0.634	-0.66	0.000345139	83.2	131.2	57610.3	61494.6	68631.8	91038.9	96920.2	101845	52260.2	53481.5	632.5	70120.7	92801.2	98201.6
High	Master Protein	P32266	Dynamin-like GTPase MGM1, mitochondrial OS=Saccharomyces cerevisiae (strain ATCC 204508 / S288c) OX=559292 GN=MGM1 PE=1 SV=3	1.231	0.3	0.0379288	105.6	85.7	10760.9	11409.3	9194.7	8741	8724.9	8740.9	9761.6	9922.6	84.7	6732.5	8354.1	8428.2
High	Master Protein	P21965	Protein kinase MCK1 OS=Saccharomyces cerevisiae (strain ATCC 204508 / S288c) OX=559292 GN=MCK1 PE=1 SV=1	1.199	0.26	0.209832	107.2	89.4	34396	33863.4	30688.7	27629.6	28248.6	30043.7	31201.7	29450.8	282.8	21281.1	27048.1	28968.9
High	Master Protein	P00445	Superoxide dismutase [Cu-Zn] OS=Saccharomyces cerevisiae (strain ATCC 204508 / S288c) OX=559292 GN=SOD1 PE=1 SV=2	1.688	0.76	0.139468	113.4	67.2	61537.5	66576.3	290921	39442.6	33385	44911.4	55822.8	57901	2680.9	30379.8	31966.2	43304.7
High	Master Protein	P32496	26S proteasome regulatory subunit RPN12 OS=Saccharomyces cerevisiae (strain ATCC 204508 / S288c) OX=559292 GN=RPN12 PE=1 SV=3	0.972	-0.04	0.985	99.5	102.3	33799	37453.9	31914.7	31355.7	35137.4	34770.6	30660.2	32573.4	294.1	24151	33644.1	33526.7
High	Master Protein	Q03497	Serine/threonine-protein kinase STE20 OS=Saccharomyces cerevisiae (strain ATCC 204508 / S288c) OX=559292 GN=STE20 PE=1 SV=1	1.324	0.41	0.00019771	119.4	90.1	8287.5	8637	8392.7	6510.1	6065.6	6336.7	7517.9	7511.5	77.3	5014.3	5807.8	6110
High	Master Protein	Q04869	Uncharacterized protein YMR315W OS=Saccharomyces cerevisiae (strain ATCC 204508 / S288c) OX=559292 GN=YMR315W PE=1 SV=1	1.758	0.81	2.2868e-05	100.3	57.1	28124.6	28965.3	24806.1	17121.6	15900.9	16002.6	25512.7	25190.9	228.6	13187.6	15225.1	15430.1
High	Master Protein	P39524	Probable phospholipid-transporting ATPase DRS2 OS=Saccharomyces cerevisiae (strain ATCC 204508 / S288c) OX=559292 GN=DRS2 PE=1 SV=2	0.924	-0.11	0.846942	83.3	90.2	10403.9	8909.2	9071.4	10374.6	9255.8	9817	9437.7	7748.2	83.6	7990.8	8862.4	9465.8
High	Master Protein	P17423	Homoserine kinase OS=Saccharomyces cerevisiae (strain ATCC 204508 / S288c) OX=559292 GN=THR1 PE=1 SV=4	1.112	0.15	0.997619	108.7	97.7	30008.1	30433.6	21589.7	26977.7	28487.6	26927	27221.4	26467.9	199	20778.9	27276.9	25963.7
High	Master Protein	P32602	Alpha-soluble NSF attachment protein OS=Saccharomyces cerevisiae (strain ATCC 204508 / S288c) OX=559292 GN=SEC17 PE=1 SV=4	1.243	0.31	0.10997	102.4	82.3	16257.8	16601.3	13331.8	13076.1	13440	12629.4	14748	14438.1	122.9	10071.6	12868.8	12177.6
High	Master Protein	P32600	Serine/threonine-protein kinase TOR2 OS=Saccharomyces cerevisiae (strain ATCC 204508 / S288c) OX=559292 GN=TOR2 PE=1 SV=3	1.052	0.07	0.446931	108.4	103	2670.7	2776.4	4296.2	2676.4	2639.9	2574.8	2422.7	2414.6	39.6	2061.4	2527.7	2482.7
High	Master Protein	P40957	Spindle assembly checkpoint component MAD1 OS=Saccharomyces cerevisiae (strain ATCC 204508 / S288c) OX=559292 GN=MAD1 PE=1 SV=1	0.98	-0.03	0.750658	96.2	98.2	5033	5227.3	4487.4	5190.5	5137.5	5008.2	4565.6	4546.2	41.4	3997.8	4919.1	4829.1
High	Master Protein	P28241	Isocitrate dehydrogenase [NAD] subunit 2, mitochondrial OS=Saccharomyces cerevisiae (strain ATCC 204508 / S288c) OX=559292 GN=IDH2 PE=1 SV=1	2.07	1.05	1.73033e-06	125.1	60.4	53445.5	58118.7	63925.7	27840.4	28636.2	28072	48482.2	50545.5	589.1	21443.4	27419.2	27067.7
High	Master Protein	P25644	DNA topoisomerase 2-associated protein PAT1 OS=Saccharomyces cerevisiae (strain ATCC 204508 / S288c) OX=559292 GN=PAT1 PE=1 SV=4	1.572	0.65	0.999954	145.6	92.6	38899.4	38451.4	9093.4	23489.9	24975.7	24462.3	35287	33440.9	83.8	18092.6	23914.3	23587.1
High	Master Protein	P43612	SIT4-associating protein SAP155 OS=Saccharomyces cerevisiae (strain ATCC 204508 / S288c) OX=559292 GN=SAP155 PE=1 SV=4	0.966	-0.05	0.809761	94.6	97.9	4252.3	4454.9	7186	4783.8	4611.3	4366.5	3857.4	3874.4	66.2	3684.6	4415.3	4210.3
High	Master Protein	P32916	Signal recognition particle receptor subunit alpha homolog OS=Saccharomyces cerevisiae (strain ATCC 204508 / S288c) OX=559292 GN=SRP101 PE=1 SV=2	0.964	-0.05	0.906482	97.2	100.8	9845.9	10431.9	9589.6	9788.7	10210.1	10493.5	8931.6	9072.5	88.4	7539.5	9776.2	10118.1
High	Master Protein	P38989	Structural maintenance of chromosomes protein 2 OS=Saccharomyces cerevisiae (strain ATCC 204508 / S288c) OX=559292 GN=SMC2 PE=1 SV=1	1.157	0.21	0.487723	111.5	96.3	5129.2	5629.4	6038.7	5552.5	4798.1	4863.5	4652.9	4895.8	55.6	4276.7	4594.2	4689.5
High	Master Protein	P53276	U3 small nucleolar RNA-associated protein 8 OS=Saccharomyces cerevisiae (strain ATCC 204508 / S288c) OX=559292 GN=UTP8 PE=1 SV=1	0.986	-0.02	0.736706	101	102.4	18437.9	18423.6	20059.9	18822	18694.6	17595.2	16725.7	16022.9	184.9	14497.2	17900.1	16965.8
High	Master Protein	P53111	NADPH-dependent aldehyde reductase ARI1 OS=Saccharomyces cerevisiae (strain ATCC 204508 / S288c) OX=559292 GN=ARI1 PE=1 SV=1	1.376	0.46	0.000561697	97	70.5	22028.5	22789.8	25934.7	16564.7	16192	17168.6	19982.8	19820.2	239	12758.6	15503.9	16554.4
High	Master Protein	Q12447	Polyamine N-acetyltransferase 1 OS=Saccharomyces cerevisiae (strain ATCC 204508 / S288c) OX=559292 GN=PAA1 PE=1 SV=1	1.284	0.36	3.48687e-05	111.1	86.6	63522.1	62501.3	58482.6	48695.6	47308.3	48712.8	57623	54357	538.9	37506.6	45297.7	46970.1
High	Master Protein	P35691	Translationally-controlled tumor protein homolog OS=Saccharomyces cerevisiae (strain ATCC 204508 / S288c) OX=559292 GN=TMA19 PE=1 SV=1	0.721	-0.47	0.0659819	94.1	130.5	138045	162491	108048	191408	172221	216599	125225	141317	995.7	147428	164902	208850
High	Master Protein	P23638	Proteasome subunit alpha type-3 OS=Saccharomyces cerevisiae (strain ATCC 204508 / S288c) OX=559292 GN=PRE9 PE=1 SV=1	1.149	0.2	0.0144494	100.1	87.2	31462.9	31785.1	35404.7	27674.8	28151.5	27103.5	28541	27643.3	326.3	21315.9	26955.1	26133.9
High	Master Protein	P25298	mRNA 3'-end-processing protein RNA14 OS=Saccharomyces cerevisiae (strain ATCC 204508 / S288c) OX=559292 GN=RNA14 PE=1 SV=2	1.045	0.06	0.571786	98.3	94.1	4458.7	4712.1	6248.3	4510.4	4780.6	4335.4	4044.6	4098.1	57.6	3474	4577.5	4180.3
High	Master Protein	P46673	Nucleoporin NUP85 OS=Saccharomyces cerevisiae (strain ATCC 204508 / S288c) OX=559292 GN=NUP85 PE=1 SV=1	1.033	0.05	0.865328	103.6	100.2	6914.3	6969.6	4802.5	6697.6	6690.3	6435.3	6272.2	6061.4	44.3	5158.7	6406	6205.1
High	Master Protein	P38911	FK506-binding nuclear protein OS=Saccharomyces cerevisiae (strain ATCC 204508 / S288c) OX=559292 GN=FPR3 PE=1 SV=2	0.692	-0.53	0.000231573	85.8	123.9	30944.1	30332.4	27260.7	43807.1	42899.8	50661	28070.4	26379.9	251.2	33741.4	41076.6	48848.6
High	Master Protein	P32644	Putative ATP-dependent RNA helicase ECM32 OS=Saccharomyces cerevisiae (strain ATCC 204508 / S288c) OX=559292 GN=ECM32 PE=1 SV=1	0.953	-0.07	0.125805	98.3	103.2	7035.4	6916.8	6670.7	7256.8	7061	7340.2	6382.1	6015.5	61.5	5589.4	6760.9	7077.6
High	Master Protein	P43603	LAS seventeen-binding protein 3 OS=Saccharomyces cerevisiae (strain ATCC 204508 / S288c) OX=559292 GN=LSB3 PE=1 SV=3	1.066	0.09	0.947361	95.7	89.7	13435.2	13724.3	9584.9	12853.8	12599.2	12580.7	12187.6	11936	88.3	9900.4	12063.7	12130.7
High	Master Protein	Q12154	ATPase GET3 OS=Saccharomyces cerevisiae (strain ATCC 204508 / S288c) OX=559292 GN=GET3 PE=1 SV=1	1.079	0.11	0.53721	99.3	92.1	52236.3	51380.2	45748.2	48200.3	47631.9	46105.7	47385.3	44685	421.6	37125.2	45607.6	44456.3
High	Master Protein	P32364	Kinesin-related protein SMY1 OS=Saccharomyces cerevisiae (strain ATCC 204508 / S288c) OX=559292 GN=SMY1 PE=1 SV=1	1.191	0.25	0.0343104	107	89.8	7458	8099.2	9507.1	6866.2	6741.4	6798.5	6765.4	7043.8	87.6	5288.6	6454.9	6555.3
High	Master Protein	P05743	60S ribosomal protein L26-A OS=Saccharomyces cerevisiae (strain ATCC 204508 / S288c) OX=559292 GN=RPL26A PE=1 SV=3	0.807	-0.31	0.00153143	86.4	107	10903.8	10827.7	11450.6	15215.2	13467	13505.3	9891.2	9416.8	105.5	11719.2	12894.7	13022.1
High	Master Protein	P23292	Casein kinase I homolog 2 OS=Saccharomyces cerevisiae (strain ATCC 204508 / S288c) OX=559292 GN=YCK2 PE=1 SV=1	0.966	-0.05	0.54748	95.1	98.5	11013.6	10944.9	9975.9	11836.9	11334.8	10716.3	9990.8	9518.7	91.9	9117.1	10853.1	10332.9
High	Master Protein	P32895	Ribose-phosphate pyrophosphokinase 1 OS=Saccharomyces cerevisiae (strain ATCC 204508 / S288c) OX=559292 GN=PRS1 PE=1 SV=1	0.897	-0.16	0.997218	101.4	113.1	22419.6	22555.3	32890.2	24794.6	25156.3	25210.1	20337.5	19616.2	303.1	19097.5	24087.2	24308.2
High	Master Protein	P40527	Probable phospholipid-transporting ATPase NEO1 OS=Saccharomyces cerevisiae (strain ATCC 204508 / S288c) OX=559292 GN=NEO1 PE=1 SV=1	0.913	-0.13	0.993442	91.7	100.4	8304.3	8308.8	12264	9763.8	9100.9	8785.1	7533.1	7226.1	113	7520.3	8714.2	8470.8
High	Master Protein	Q12189	Ribose-5-phosphate isomerase OS=Saccharomyces cerevisiae (strain ATCC 204508 / S288c) OX=559292 GN=RKI1 PE=1 SV=1	0.528	-0.92	0.0951139	71.3	135	11201.5	11464.5	20686.2	21720.5	21756.1	20772.9	10161.3	9970.6	190.6	16729.8	20831.5	20029.8
High	Master Protein	Q07825	Putative Xaa-Pro aminopeptidase FRA1 OS=Saccharomyces cerevisiae (strain ATCC 204508 / S288c) OX=559292 GN=FRA1 PE=1 SV=1	1.275	0.35	0.556869	104.5	82	14752	15645.9	10235.5	11696.6	11550.6	11572.2	13382	13607.1	94.3	9009	11059.7	11158.2
High	Master Protein	P25045	Serine palmitoyltransferase 1 OS=Saccharomyces cerevisiae (strain ATCC 204508 / S288c) OX=559292 GN=LCB1 PE=1 SV=2	0.873	-0.2	0.976787	91.5	104.8	11855.2	12260.5	21570.2	14044.2	14164.9	13164.1	10754.2	10662.9	198.8	10817.2	13562.9	12693.1
High	Master Protein	P31374	Serine/threonine-protein kinase PSK1 OS=Saccharomyces cerevisiae (strain ATCC 204508 / S288c) OX=559292 GN=PSK1 PE=1 SV=2	1.281	0.36	0.0056097	103.5	80.8	6324.5	6538.7	7995.8	5258.4	5007.3	5104.1	5737.2	5686.7	73.7	4050.2	4794.5	4921.5
High	Master Protein	P25574	ER membrane protein complex subunit 1 OS=Saccharomyces cerevisiae (strain ATCC 204508 / S288c) OX=559292 GN=EMC1 PE=1 SV=1	1.446	0.53	3.42261e-07	125.9	87.1	27726.5	26637.3	26813.4	18543.4	18774.3	18395.4	25151.6	23166.3	247.1	14282.6	17976.4	17737.3
High	Master Protein	P08679	Citrate synthase, peroxisomal OS=Saccharomyces cerevisiae (strain ATCC 204508 / S288c) OX=559292 GN=CIT2 PE=1 SV=1	1.461	0.55	0.116608	104.5	71.5	9103.7	9742.1	6200	6237.3	6231.3	6009.2	8258.2	8472.7	57.1	4804.1	5966.5	5794.2
High	Master Protein	Q12038	Lethal(2) giant larvae protein homolog SRO7 OS=Saccharomyces cerevisiae (strain ATCC 204508 / S288c) OX=559292 GN=SRO7 PE=1 SV=1	1.123	0.17	0.546142	106.9	95.1	6041.7	6991.7	7413.3	6013.2	6223.8	6384.7	5480.7	6080.6	68.3	4631.6	5959.3	6156.2
High	Master Protein	P11076	ADP-ribosylation factor 1 OS=Saccharomyces cerevisiae (strain ATCC 204508 / S288c) OX=559292 GN=ARF1 PE=1 SV=3	0.902	-0.15	0.0703373	95	105.3	92056.4	99751.9	88865	101537	102052	104853	83507.4	86753.6	818.9	78206.6	97715.3	101102
High	Master Protein	P38858	6-phosphogluconolactonase 3 OS=Saccharomyces cerevisiae (strain ATCC 204508 / S288c) OX=559292 GN=SOL3 PE=1 SV=2	0.794	-0.33	0.00140336	97.8	123.1	16915.9	17310.8	18718.1	21795.6	22243.3	20830.5	15345	15055.1	172.5	16787.6	21298	20085.3
High	Master Protein	P36015	Synaptobrevin homolog YKT6 OS=Saccharomyces cerevisiae (strain ATCC 204508 / S288c) OX=559292 GN=YKT6 PE=1 SV=1	0.886	-0.17	0.68566	87.4	98.7	25949.3	26158.7	30724.4	29531.6	29699.3	28062.2	23539.4	22750.1	283.1	22746	28437.1	27058.3
High	Master Protein	O13297	mRNA-capping enzyme subunit beta OS=Saccharomyces cerevisiae (strain ATCC 204508 / S288c) OX=559292 GN=CET1 PE=1 SV=2	1.167	0.22	0.00536648	109.2	93.6	11137.8	11525.9	10489.5	9540.9	9797	9498.1	10103.5	10024	96.7	7348.6	9380.6	9158.3
High	Master Protein	P41895	Transcription initiation factor IIF subunit alpha OS=Saccharomyces cerevisiae (strain ATCC 204508 / S288c) OX=559292 GN=TFG1 PE=1 SV=2	1.52	0.6	0.0271455	118.9	78.2	7721.3	7545.6	5518.1	4976.4	4949.1	4964.4	7004.2	6562.3	50.9	3833	4738.8	4786.8
High	Master Protein	P40471	NADPH-dependent 1-acyldihydroxyacetone phosphate reductase OS=Saccharomyces cerevisiae (strain ATCC 204508 / S288c) OX=559292 GN=AYR1 PE=1 SV=1	1.406	0.49	0.00061618	105.8	75.2	18989.7	19473.9	17229.3	14390.2	13510.9	13209.9	17226.2	16936.4	158.8	11083.7	12936.7	12737.3
High	Master Protein	P47039	Probable kynurenine--oxoglutarate transaminase BNA3 OS=Saccharomyces cerevisiae (strain ATCC 204508 / S288c) OX=559292 GN=BNA3 PE=1 SV=1	1.192	0.25	0.0142405	110.2	92.4	16458.1	16179.5	19714	14028	13802.8	13252.6	14929.7	14071.2	181.7	10804.7	13216.2	12778.5
High	Master Protein	P53313	Protein SDA1 OS=Saccharomyces cerevisiae (strain ATCC 204508 / S288c) OX=559292 GN=SDA1 PE=1 SV=1	0.81	-0.3	0.0400349	97.2	120.1	13874.5	13472.2	15828.9	17736.5	16335.2	17136.4	12586	11716.7	145.9	13661.1	15641	16523.4
High	Master Protein	P29468	Poly(A) polymerase OS=Saccharomyces cerevisiae (strain ATCC 204508 / S288c) OX=559292 GN=PAP1 PE=1 SV=1	1.001	0	0.941004	96.7	96.6	8818.3	9096.6	10182.6	9490.4	9083.1	8828.1	7999.3	7911.2	93.8	7309.8	8697.1	8512.2
High	Master Protein	Q04178	Hypoxanthine-guanine phosphoribosyltransferase OS=Saccharomyces cerevisiae (strain ATCC 204508 / S288c) OX=559292 GN=HPT1 PE=1 SV=1	0.763	-0.39	0.429469	87.8	115	19351.3	19693.1	28296.9	25797.3	24171.7	28137.9	17554.2	17126.9	260.8	19869.8	23144.4	27131.3
High	Master Protein	P48234	Ribosome biogenesis protein ENP2 OS=Saccharomyces cerevisiae (strain ATCC 204508 / S288c) OX=559292 GN=ENP2 PE=1 SV=2	1.309	0.39	0.0127322	117.3	89.6	17124.3	17034.6	14121.6	13017	13073.5	12751.8	15534	14814.9	130.1	10026	12517.9	12295.6
High	Master Protein	P38822	Protein BZZ1 OS=Saccharomyces cerevisiae (strain ATCC 204508 / S288c) OX=559292 GN=BZZ1 PE=1 SV=1	1.27	0.34	0.000576372	116.4	91.7	11185.8	11391.5	11466.7	8971.8	8804.8	9789.2	10147	9907.1	105.7	6910.3	8430.6	9439
High	Master Protein	P15436	DNA polymerase delta catalytic subunit OS=Saccharomyces cerevisiae (strain ATCC 204508 / S288c) OX=559292 GN=POL3 PE=1 SV=4	1.091	0.13	0.610708	106.6	97.7	8722	8923.9	7804.5	8268.9	7995	7784.1	7912	7761.1	71.9	6368.9	7655.2	7505.6
High	Master Protein	P06785	Thymidylate synthase OS=Saccharomyces cerevisiae (strain ATCC 204508 / S288c) OX=559292 GN=CDC21 PE=1 SV=1	1.226	0.29	0.00192697	100.9	82.3	9215.9	9659.9	10207.1	7878	8069.2	7709.6	8360	8401.1	94.1	6067.8	7726.3	7433.8
High	Master Protein	P38793	tRNA (guanine(37)-N1)-methyltransferase OS=Saccharomyces cerevisiae (strain ATCC 204508 / S288c) OX=559292 GN=TRM5 PE=1 SV=1	1.097	0.13	0.999215	114.4	104.2	12625.7	12598	9280.6	11554.8	11470	11481	11453.2	10956.4	85.5	8899.8	10982.5	11070.2
High	Master Protein	P15454	Guanylate kinase OS=Saccharomyces cerevisiae (strain ATCC 204508 / S288c) OX=559292 GN=GUK1 PE=1 SV=2	0.793	-0.33	0.000401824	104	131.1	41595.2	40340.5	40915	53676.7	51583.2	50577.8	37732.4	35083.8	377	41343.3	49391	48768.4
High	Master Protein	P40438	VPS10 homolog 1 OS=Saccharomyces cerevisiae (strain ATCC 204508 / S288c) OX=559292 GN=VTH1 PE=1 SV=1	1.056	0.08	0.999994	91.4	86.6	3066.2	3328.4	2405	2876.8	2921.9	2903.6	2781.4	2894.7	22.2	2215.8	2797.8	2799.7
High	Master Protein	Q05515	Survival factor 1 OS=Saccharomyces cerevisiae (strain ATCC 204508 / S288c) OX=559292 GN=SVF1 PE=1 SV=1	0.857	-0.22	0.0557414	95.2	111.1	16920.6	18439.3	15785.4	18408.7	19744.9	20169	15349.2	16036.5	145.5	14178.9	18905.8	19447.4
High	Master Protein	P23644	Mitochondrial import receptor subunit TOM40 OS=Saccharomyces cerevisiae (strain ATCC 204508 / S288c) OX=559292 GN=TOM40 PE=1 SV=1	1.088	0.12	0.476231	94.8	87.1	26049.6	26492.1	23933	23861.7	25073	23934.2	23630.4	23040	220.5	18378.9	24007.5	23077.9
High	Master Protein	Q12386	Actin-like protein ARP8 OS=Saccharomyces cerevisiae (strain ATCC 204508 / S288c) OX=559292 GN=ARP8 PE=1 SV=1	1.07	0.1	0.350957	102.6	95.9	9207.8	9579.9	12336.6	9344.3	8956.7	8444.1	8352.7	8331.6	113.7	7197.2	8576.1	8142.1
High	Master Protein	P33334	Pre-mRNA-splicing factor 8 OS=Saccharomyces cerevisiae (strain ATCC 204508 / S288c) OX=559292 GN=PRP8 PE=1 SV=1	0.88	-0.18	0.0486513	90.9	103.2	4753.9	4924.5	4194.9	5619.5	5297.5	5399.4	4312.4	4282.8	38.7	4328.3	5072.4	5206.2
High	Master Protein	P38850	Regulator of Ty1 transposition protein 107 OS=Saccharomyces cerevisiae (strain ATCC 204508 / S288c) OX=559292 GN=RTT107 PE=1 SV=1	0.902	-0.15	0.0366013	93.7	103.9	7082.3	7276.3	7283	8011.3	8828.4	8064.7	6424.6	6328.2	67.1	6170.6	8453.2	7776.2
High	Master Protein	Q12453	Cytoplasmic export protein 1 OS=Saccharomyces cerevisiae (strain ATCC 204508 / S288c) OX=559292 GN=CEX1 PE=1 SV=1	0.933	-0.1	0.999985	99	106.1	7667	7941.7	10293.2	8511.6	8375.1	8728.7	6954.9	6906.9	94.9	6555.9	8019.2	8416.4
High	Master Protein	P36076	Coenzyme A biosynthesis protein 3 OS=Saccharomyces cerevisiae (strain ATCC 204508 / S288c) OX=559292 GN=CAB3 PE=1 SV=1	1.298	0.38	0.981391	104	80.2	8162.1	8631.9	4226.7	6096	6405.1	6289.5	7404.1	7507.1	39	4695.3	6132.9	6064.5
High	Master Protein	Q01329	Pre-tRNA-processing protein PTA1 OS=Saccharomyces cerevisiae (strain ATCC 204508 / S288c) OX=559292 GN=PTA1 PE=1 SV=1	1.09	0.12	0.229356	92.4	84.8	8343.9	8767.3	11233.7	8213.3	8047	7740.4	7569.1	7624.9	103.5	6326.1	7705	7463.5
High	Master Protein	P25349	Flavoprotein-like protein YCP4 OS=Saccharomyces cerevisiae (strain ATCC 204508 / S288c) OX=559292 GN=YCP4 PE=1 SV=1	2.446	1.29	0.0372562	150.6	61.6	37026	38706.5	18594.8	14855.8	15135.2	16534.1	33587.5	33662.8	171.4	11442.3	14491.9	15942.6
High	Master Protein	Q03774	tRNA (guanine-N(7)-)-methyltransferase non-catalytic subunit TRM82 OS=Saccharomyces cerevisiae (strain ATCC 204508 / S288c) OX=559292 GN=TRM82 PE=1 SV=1	1.013	0.02	0.999543	102.4	101.1	13636.2	13080.7	14564	14806.1	13462.5	13221.6	12369.9	11376.2	134.2	11404.1	12890.4	12748.6
High	Master Protein	P33441	THO complex subunit MFT1 OS=Saccharomyces cerevisiae (strain ATCC 204508 / S288c) OX=559292 GN=MFT1 PE=1 SV=1	0.946	-0.08	0.943074	105.4	111.4	13055.2	13679.7	15292.3	14709.4	13765.8	14459	11842.8	11897.2	140.9	11329.6	13180.8	13941.7
High	Master Protein	Q04067	Eukaryotic translation initiation factor 3 subunit G OS=Saccharomyces cerevisiae (strain ATCC 204508 / S288c) OX=559292 GN=TIF35 PE=1 SV=1	1.065	0.09	0.999246	98.3	92.3	35100.9	32590	25786.9	31771.4	29524.3	30613.5	31841.2	28343.3	237.6	24471.2	28269.5	29518.3
High	Master Protein	P40106	Glycerol-1-phosphate phosphohydrolase 2 OS=Saccharomyces cerevisiae (strain ATCC 204508 / S288c) OX=559292 GN=GPP2 PE=1 SV=1	1.639	0.71	0.00233146	95.7	58.4	16602.6	18899.2	23708.8	11971	11304.1	11533.6	15060.8	16436.5	218.5	9220.4	10823.7	11121
High	Master Protein	P38861	60S ribosomal export protein NMD3 OS=Saccharomyces cerevisiae (strain ATCC 204508 / S288c) OX=559292 GN=NMD3 PE=1 SV=3	0.893	-0.16	0.110111	88.7	99.3	16260.3	16872.6	15994.1	18398	18210.7	17302.5	14750.3	14674	147.4	14170.6	17436.8	16683.5
High	Master Protein	Q92331	Vacuolar protein sorting-associated protein 5 OS=Saccharomyces cerevisiae (strain ATCC 204508 / S288c) OX=559292 GN=VPS5 PE=1 SV=1	1.217	0.28	0.000537455	115	94.5	10445.2	11343.5	10908.8	8965.8	8653	9126.6	9475.2	9865.3	100.5	6905.7	8285.3	8800.1
High	Master Protein	P07273	Transcription elongation factor S-II OS=Saccharomyces cerevisiae (strain ATCC 204508 / S288c) OX=559292 GN=DST1 PE=1 SV=4	1.16	0.21	0.0226599	105.7	91.2	33794.3	28945.7	27568.9	22889	24961.6	25298.8	30655.9	25173.9	254.1	17629.7	23900.8	24393.8
High	Master Protein	P20424	Signal recognition particle subunit SRP54 OS=Saccharomyces cerevisiae (strain ATCC 204508 / S288c) OX=559292 GN=SRP54 PE=1 SV=2	1.068	0.09	0.686034	102.4	95.9	25195.2	24800.2	21906.7	23226.1	23284.7	22443.1	22855.4	21568.6	201.9	17889.3	22295.2	21640.2
High	Master Protein	P38137	Peroxisomal-coenzyme A synthetase OS=Saccharomyces cerevisiae (strain ATCC 204508 / S288c) OX=559292 GN=PCS60 PE=1 SV=1	1.158	0.21	0.955017	101.8	88	19431.3	20538.2	14157.8	16444.4	16784	17862.9	17626.8	17861.9	130.5	12665.9	16070.7	17223.9
High	Master Protein	Q12314	Protein arginine N-methyltransferase SFM1 OS=Saccharomyces cerevisiae (strain ATCC 204508 / S288c) OX=559292 GN=SFM1 PE=1 SV=1	0.984	-0.02	0.994241	101.2	102.9	38124.5	39913	42633.3	40574	40611.8	40337.5	34584	34712.1	392.9	31251.2	38885.9	38894.5
High	Master Protein	P46676	Suppressor of mar1-1 protein OS=Saccharomyces cerevisiae (strain ATCC 204508 / S288c) OX=559292 GN=SUM1 PE=1 SV=2	0.85	-0.23	0.171874	95.9	112.8	2668.4	2784.4	1577.1	3137.5	3211.2	3132.9	2420.6	2421.6	14.5	2416.6	3074.7	3020.8
High	Master Protein	P47031	Inclusion body clearance protein IML2 OS=Saccharomyces cerevisiae (strain ATCC 204508 / S288c) OX=559292 GN=IML2 PE=1 SV=1	1.032	0.05	0.919634	94.8	91.8	7060.8	7879.4	9323.8	8052.4	7365	7632.9	6405.1	6852.7	85.9	6202.1	7052	7359.8
High	Master Protein	Q01454	DNA polymerase alpha-binding protein OS=Saccharomyces cerevisiae (strain ATCC 204508 / S288c) OX=559292 GN=CTF4 PE=1 SV=2	1.091	0.13	0.200346	102.5	93.9	8993.2	9120.5	8404.6	8546.2	8243.8	7974.2	8158	7932.1	77.5	6582.5	7893.5	7689
High	Master Protein	Q12029	Sideroflexin FSF1 OS=Saccharomyces cerevisiae (strain ATCC 204508 / S288c) OX=559292 GN=FSF1 PE=1 SV=1	1.057	0.08	0.840945	96	90.9	16107.9	15942	12131.6	17003.7	14900.9	15082.9	14612	13864.6	111.8	13096.7	14267.6	14543.3
High	Master Protein	P33313	Hsp70/Hsp90 co-chaperone CNS1 OS=Saccharomyces cerevisiae (strain ATCC 204508 / S288c) OX=559292 GN=CNS1 PE=1 SV=1	0.923	-0.12	0.196727	99.8	108	17449.6	17518.6	18760.9	19684	18662.7	18973.7	15829.1	15235.8	172.9	15161.2	17869.6	18294.9
High	Master Protein	P53731	Actin-related protein 2/3 complex subunit 2 OS=Saccharomyces cerevisiae (strain ATCC 204508 / S288c) OX=559292 GN=ARC35 PE=1 SV=1	1.223	0.29	0.00290143	98.1	80.2	25938.8	26804.4	30785.7	21927.3	21914.4	20841.6	23530	23311.6	283.7	16889	20983.1	20096
High	Master Protein	Q12074	Spermidine synthase OS=Saccharomyces cerevisiae (strain ATCC 204508 / S288c) OX=559292 GN=SPE3 PE=3 SV=1	0.562	-0.83	0.117872	70.2	124.8	19582.8	20110.9	35136.4	38099.2	35761.9	33837.6	17764.2	17490.3	323.8	29345.1	34242.1	32627.1
High	Master Protein	P23337	Glycogen [starch] synthase isoform 1 OS=Saccharomyces cerevisiae (strain ATCC 204508 / S288c) OX=559292 GN=GSY1 PE=1 SV=3	1.883	0.91	0.0391483	120	63.7	6152.8	6615	3844.4	3601.6	3268	3174	5581.4	5753	35.4	2774.1	3129.1	3060.4
High	Master Protein	P48562	Serine/threonine-protein kinase CLA4 OS=Saccharomyces cerevisiae (strain ATCC 204508 / S288c) OX=559292 GN=CLA4 PE=1 SV=1	1.055	0.08	0.237956	99.6	94.5	4233.7	4445.3	4469	4062.4	4264.2	4214.5	3840.5	3866	41.2	3129	4083	4063.7
High	Master Protein	P14127	40S ribosomal protein S17-B OS=Saccharomyces cerevisiae (strain ATCC 204508 / S288c) OX=559292 GN=RPS17B PE=1 SV=1	0.79	-0.34	0.00233535	91.6	116	87736.3	83148.5	97056.3	112197	111090	108510	79588.6	72313.7	894.4	86416.9	106369	104628
High	Master Protein	P0CX48	40S ribosomal protein S11-B OS=Saccharomyces cerevisiae (strain ATCC 204508 / S288c) OX=559292 GN=RPS11B PE=1 SV=1	0.678	-0.56	0.0183117	82	121.1	92387.8	90842	117128	130924	142736	136331	83808.1	79004.7	1079.4	100842	136670	131454
High	Master Protein	Q07807	mRNA-binding protein PUF3 OS=Saccharomyces cerevisiae (strain ATCC 204508 / S288c) OX=559292 GN=PUF3 PE=1 SV=1	1.128	0.17	0.30764	102.5	90.8	12148	13455.5	16809.5	11925.7	12631.8	11892.9	11019.8	11702.1	154.9	9185.5	12095	11467.5
High	Master Protein	P39101	Protein CAJ1 OS=Saccharomyces cerevisiae (strain ATCC 204508 / S288c) OX=559292 GN=CAJ1 PE=1 SV=1	1.076	0.11	0.768201	100.5	93.4	21064.9	20418.8	18002.8	18981.3	18859.5	19282.3	19108.7	17758.1	165.9	14619.9	18058	18592.5
High	Master Protein	Q12068	NADPH-dependent methylglyoxal reductase GRE2 OS=Saccharomyces cerevisiae (strain ATCC 204508 / S288c) OX=559292 GN=GRE2 PE=1 SV=1	0.747	-0.42	0.83351	73.9	98.9	10529.6	11215	19611.7	15525.1	15011	14536.2	9551.7	9753.6	180.7	11957.8	14373	14016.1
High	Master Protein	P47160	Epsin-3 OS=Saccharomyces cerevisiae (strain ATCC 204508 / S288c) OX=559292 GN=ENT3 PE=1 SV=1	1.065	0.09	0.962404	102.1	95.9	19453.8	19237	16144.5	18071.1	17208.5	18142.2	17647.2	16730.3	148.8	13918.8	16477.1	17493.2
High	Master Protein	P40970	Serine palmitoyltransferase 2 OS=Saccharomyces cerevisiae (strain ATCC 204508 / S288c) OX=559292 GN=LCB2 PE=1 SV=1	0.938	-0.09	0.983935	91.7	97.8	10111.6	10077.9	12319.7	11815.5	10783.3	10565.3	9172.5	8764.7	113.5	9100.6	10325	10187.4
High	Master Protein	P38966	Uncharacterized protein YDR089W OS=Saccharomyces cerevisiae (strain ATCC 204508 / S288c) OX=559292 GN=YDR089W PE=1 SV=2	1.084	0.12	0.981855	98.5	90.8	4733.8	4897	3600.6	4966.7	4365.6	4248.6	4294.2	4258.9	33.2	3825.5	4180.1	4096.6
High	Master Protein	P07258	Carbamoyl-phosphate synthase arginine-specific small chain OS=Saccharomyces cerevisiae (strain ATCC 204508 / S288c) OX=559292 GN=CPA1 PE=1 SV=1	1.602	0.68	0.221191	143	89.2	16690.9	16049	9414.9	10017.1	10204.1	9786.7	15140.8	13957.7	86.8	7715.5	9770.4	9436.6
High	Master Protein	P40054	D-3-phosphoglycerate dehydrogenase 1 OS=Saccharomyces cerevisiae (strain ATCC 204508 / S288c) OX=559292 GN=SER3 PE=1 SV=1	1.263	0.34	0.0531506	78.9	62.5	5511.5	6255.3	8067.2	4630.4	5077.7	4953.9	4999.7	5440.2	74.3	3566.5	4861.9	4776.7
High	Master Protein	P14743	Glycylpeptide N-tetradecanoyltransferase OS=Saccharomyces cerevisiae (strain ATCC 204508 / S288c) OX=559292 GN=NMT1 PE=1 SV=1	0.991	-0.01	0.634951	94.3	95.1	11755.2	11713.6	16577	12081.9	11856.2	11397.1	10663.5	10187.3	152.8	9305.8	11352.3	10989.4
High	Master Protein	P39966	Protein phosphatase 2C homolog 2 OS=Saccharomyces cerevisiae (strain ATCC 204508 / S288c) OX=559292 GN=PTC2 PE=1 SV=1	1.151	0.2	0.559384	109.4	95.1	24545.9	23934.2	19215.6	20354.5	20795.4	20816.1	22266.4	20815.5	177.1	15677.6	19911.6	20071.4
High	Master Protein	P0CX40	40S ribosomal protein S8-B OS=Saccharomyces cerevisiae (strain ATCC 204508 / S288c) OX=559292 GN=RPS8B PE=1 SV=1	0.882	-0.18	0.16461	96.3	109.2	81559.6	74671.2	58428.4	83315.5	84676.6	88981.6	73985.4	64941	538.4	64171.9	81078	85798.3
High	Master Protein	P13433	DNA-directed RNA polymerase, mitochondrial OS=Saccharomyces cerevisiae (strain ATCC 204508 / S288c) OX=559292 GN=RPO41 PE=3 SV=2	0.887	-0.17	0.555911	92.6	104.4	4189.5	4817.8	4285.1	4961.3	4831.4	4392.2	3800.5	4190	39.5	3821.3	4626.1	4235
High	Master Protein	Q12080	Ribosome biogenesis protein NOP53 OS=Saccharomyces cerevisiae (strain ATCC 204508 / S288c) OX=559292 GN=NOP53 PE=1 SV=1	1.071	0.1	0.446221	105.9	98.9	20793.7	18965.2	22995.1	19762.4	19260.6	19412.5	18862.6	16493.9	211.9	15221.5	18442.1	18718
High	Master Protein	Q08645	Folylpolyglutamate synthase OS=Saccharomyces cerevisiae (strain ATCC 204508 / S288c) OX=559292 GN=MET7 PE=1 SV=1	1.174	0.23	0.000256799	100.6	85.7	22780.1	22813.5	24499.4	19163.3	19679.2	19433.8	20664.5	19840.7	225.8	14760.1	18842.9	18738.6
High	Master Protein	P38798	Nonsense-mediated mRNA decay protein 2 OS=Saccharomyces cerevisiae (strain ATCC 204508 / S288c) OX=559292 GN=NMD2 PE=1 SV=2	1.311	0.39	2.50569e-05	126.8	96.8	9080.3	9322.9	8836	6742.9	6926.6	6948.3	8237	8108.1	81.4	5193.6	6632.2	6699.8
High	Master Protein	P39998	Enhancer of mRNA-decapping protein 3 OS=Saccharomyces cerevisiae (strain ATCC 204508 / S288c) OX=559292 GN=EDC3 PE=1 SV=1	1.395	0.48	0.553851	122.4	87.7	16407.8	15797.7	9559.5	11631.4	10929.1	11321.6	14884.1	13739.2	88.1	8958.8	10464.6	10916.6
High	Master Protein	P15442	eIF-2-alpha kinase GCN2 OS=Saccharomyces cerevisiae (strain ATCC 204508 / S288c) OX=559292 GN=GCN2 PE=1 SV=3	1.2	0.26	0.97993	107.9	90	4061.1	4454.6	2606.4	3606.1	3385.3	3340.9	3683.9	3874.2	24	2777.5	3241.4	3221.4
High	Master Protein	P53136	Ribosome biogenesis protein NSA1 OS=Saccharomyces cerevisiae (strain ATCC 204508 / S288c) OX=559292 GN=NSA1 PE=1 SV=1	1.078	0.11	0.0651767	102.9	95.4	12928.3	13031.4	13308.4	12087	12324.4	11879	11727.7	11333.4	122.6	9309.8	11800.6	11454.1
High	Master Protein	P18961	Serine/threonine-protein kinase YPK2/YKR2 OS=Saccharomyces cerevisiae (strain ATCC 204508 / S288c) OX=559292 GN=YPK2 PE=1 SV=1	1.939	0.96	0.115226	132.2	68.2	2746.5	3348	1433.5	1495.8	1271.2	1416.6	2491.5	2911.7	13.2	1152.1	1217.1	1365.9
High	Master Protein	P39523	Uncharacterized protein YMR124W OS=Saccharomyces cerevisiae (strain ATCC 204508 / S288c) OX=559292 GN=YMR124W PE=1 SV=2	1.291	0.37	0.000107769	110.6	85.7	4774	5277.2	4695.3	3746.9	3579.4	3696.7	4330.6	4589.5	43.3	2885.9	3427.3	3564.5
High	Master Protein	P36516	54S ribosomal protein L3, mitochondrial OS=Saccharomyces cerevisiae (strain ATCC 204508 / S288c) OX=559292 GN=MRPL3 PE=1 SV=2	1.311	0.39	9.72435e-06	107.5	82	18679.8	20279.5	18950.8	14455.9	14234.6	14577.9	16945.1	17637	174.6	11134.4	13629.6	14056.4
High	Master Protein	P11938	DNA-binding protein RAP1 OS=Saccharomyces cerevisiae (strain ATCC 204508 / S288c) OX=559292 GN=RAP1 PE=1 SV=2	0.85	-0.23	0.937056	91.1	107.1	7257.9	7672.7	11281.9	9481.7	8836.4	9022.2	6583.9	6672.9	104	7303.1	8460.8	8699.4
High	Master Protein	P53959	Conserved oligomeric Golgi complex subunit 6 OS=Saccharomyces cerevisiae (strain ATCC 204508 / S288c) OX=559292 GN=COG6 PE=1 SV=1	1.19	0.25	0.466205	111.8	93.9	5418	5582.6	4233.3	4420.7	4625.3	4552.3	4914.9	4855.1	39	3404.9	4428.7	4389.5
High	Master Protein	P38439	RNA polymerase-associated protein LEO1 OS=Saccharomyces cerevisiae (strain ATCC 204508 / S288c) OX=559292 GN=LEO1 PE=1 SV=1	1.135	0.18	0.337135	117.4	103.4	15450.5	17304.2	22290.9	15240.1	14214.7	16679.7	14015.6	15049.3	205.4	11738.4	13610.6	16083
High	Master Protein	Q06336	ADP-ribosylation factor-binding protein GGA1 OS=Saccharomyces cerevisiae (strain ATCC 204508 / S288c) OX=559292 GN=GGA1 PE=1 SV=1	1.431	0.52	0.299496	107.7	75.3	8060.7	8521.3	5213.6	5842.2	5633.5	5435.2	7312.2	7410.9	48	4499.8	5394.1	5240.7
High	Master Protein	Q12387	N-terminal acetyltransferase B complex subunit MDM20 OS=Saccharomyces cerevisiae (strain ATCC 204508 / S288c) OX=559292 GN=MDM20 PE=1 SV=1	0.985	-0.02	0.998081	95.9	97.4	15714.6	15490	14659.6	13777.6	16119	15731.1	14255.2	13471.6	135.1	10611.9	15433.9	15168.4
High	Master Protein	P43556	Rho-GTPase-activating protein RGD2 OS=Saccharomyces cerevisiae (strain ATCC 204508 / S288c) OX=559292 GN=RGD2 PE=1 SV=1	1.127	0.17	0.00223853	103	91.3	7395	7520.4	7816.5	6847	6584.4	6672.4	6708.3	6540.5	72	5273.8	6304.5	6433.7
High	Master Protein	P46669	DNA-directed RNA polymerase I subunit RPA43 OS=Saccharomyces cerevisiae (strain ATCC 204508 / S288c) OX=559292 GN=RPA43 PE=1 SV=2	1.113	0.15	0.00118594	104.3	93.7	25106	25020.4	25885.1	22518.1	22650.2	22563.7	22774.5	21760.1	238.5	17344	21687.6	21756.5
High	Master Protein	P32340	Rotenone-insensitive NADH-ubiquinone oxidoreductase, mitochondrial OS=Saccharomyces cerevisiae (strain ATCC 204508 / S288c) OX=559292 GN=NDI1 PE=1 SV=1	1.404	0.49	0.00908844	108.8	77.5	12300.7	14304.6	17438.4	10188.6	10193.4	9760	11158.4	12440.7	160.7	7847.5	9760.2	9410.8
High	Master Protein	P38164	SEH-associated protein 4 OS=Saccharomyces cerevisiae (strain ATCC 204508 / S288c) OX=559292 GN=SEA4 PE=1 SV=2	1.045	0.06	0.43085	103.1	98.7	4886.2	4975.4	5801.5	4964.5	4762.8	4751.4	4432.4	4327.1	53.5	3823.8	4560.4	4581.4
High	Master Protein	P53848	Folic acid synthesis protein FOL1 OS=Saccharomyces cerevisiae (strain ATCC 204508 / S288c) OX=559292 GN=FOL1 PE=1 SV=2	1.001	0	0.627664	101	101	10424	10672.5	14638.9	10662.6	10453.9	10702.8	9455.9	9281.8	134.9	8212.6	10009.6	10319.9
High	Master Protein	Q05029	Protein BCH1 OS=Saccharomyces cerevisiae (strain ATCC 204508 / S288c) OX=559292 GN=BCH1 PE=1 SV=1	1.093	0.13	0.199685	100.4	91.8	11775.1	12334.4	13195.8	11780.7	11283.5	10879.8	10681.6	10727.1	121.6	9073.9	10804	10490.5
High	Master Protein	P25040	20S rRNA accumulation protein 4 OS=Saccharomyces cerevisiae (strain ATCC 204508 / S288c) OX=559292 GN=TSR4 PE=1 SV=2	1.021	0.03	0.859845	104.3	102.2	13741	14156.3	10192.3	13024.4	13461.8	13657.9	12464.9	12311.6	93.9	10031.7	12889.7	13169.3
High	Master Protein	P17891	Clathrin light chain OS=Saccharomyces cerevisiae (strain ATCC 204508 / S288c) OX=559292 GN=CLC1 PE=1 SV=1	1.28	0.36	0.01807	112.8	88.1	39036.3	40349.6	36393.3	30486.5	24949	30854.2	35411.1	35091.8	335.4	23481.5	23888.7	29750.4
High	Master Protein	P25631	Ankyrin repeat-containing protein YCR051W OS=Saccharomyces cerevisiae (strain ATCC 204508 / S288c) OX=559292 GN=YCR051W PE=1 SV=1	1.555	0.64	0.0615953	140.3	90.3	20506.7	22719.4	13955.2	13725.7	11543.2	13188.8	18602.3	19758.9	128.6	10571.9	11052.7	12716.9
High	Master Protein	P32316	Acetyl-CoA hydrolase OS=Saccharomyces cerevisiae (strain ATCC 204508 / S288c) OX=559292 GN=ACH1 PE=1 SV=2	0.983	-0.02	0.999822	80.8	82.2	9140.2	10407.3	12777.5	10585.1	10787	10455.6	8291.4	9051.1	117.7	8152.9	10328.6	10081.6
High	Master Protein	P19146	ADP-ribosylation factor 2 OS=Saccharomyces cerevisiae (strain ATCC 204508 / S288c) OX=559292 GN=ARF2 PE=1 SV=3	0.607	-0.72	0.0251769	66.3	109.1	504.1	624.7	739.3	998.1	1202.2	1028.6	457.3	543.3	6.8	768.8	1151.1	991.8
High	Master Protein	P53909	Adenine deaminase OS=Saccharomyces cerevisiae (strain ATCC 204508 / S288c) OX=559292 GN=AAH1 PE=1 SV=1	1.456	0.54	0.0185895	146.1	100.3	40339.3	42880.6	31661.7	27705.4	23794.9	28691.7	36593.2	37293	291.8	21339.5	22783.6	27665.2
High	Master Protein	P32891	D-lactate dehydrogenase [cytochrome] 1, mitochondrial OS=Saccharomyces cerevisiae (strain ATCC 204508 / S288c) OX=559292 GN=DLD1 PE=1 SV=2	1.256	0.33	0.0458654	103.3	82.2	9825.4	10930.3	13615.6	8869.7	8704.3	8625.4	8913	9506	125.5	6831.7	8334.4	8316.8
High	Master Protein	P46681	D-2-hydroxyglutarate--pyruvate transhydrogenase DLD2 OS=Saccharomyces cerevisiae (strain ATCC 204508 / S288c) OX=559292 GN=DLD2 PE=1 SV=1	1.081	0.11	0.187323	98.6	91.2	10562.2	11163.2	12088.8	10657.8	10328.7	9917.1	9581.3	9708.6	111.4	8208.9	9889.7	9562.3
High	Master Protein	P29704	Squalene synthase OS=Saccharomyces cerevisiae (strain ATCC 204508 / S288c) OX=559292 GN=ERG9 PE=1 SV=2	1.118	0.16	0.107465	97.7	87.4	39312.4	37068.7	41666.5	36189.2	35150.4	32536	35661.6	32238.4	384	27873.9	33656.6	31372
High	Master Protein	P18963	Inhibitory regulator protein IRA1 OS=Saccharomyces cerevisiae (strain ATCC 204508 / S288c) OX=559292 GN=IRA1 PE=1 SV=2	1.218	0.28	0.0196859	114.3	93.9	4896.7	5075	5977.3	4317.8	4167.1	4067.1	4442	4413.7	55.1	3325.7	3990	3921.6
High	Master Protein	P23639	Proteasome subunit alpha type-2 OS=Saccharomyces cerevisiae (strain ATCC 204508 / S288c) OX=559292 GN=PRE8 PE=1 SV=1	1.061	0.09	0.273339	93.8	88.4	26212.1	26594.6	34877.9	24879.2	25067.9	25337.9	23777.9	23129.1	321.4	19162.6	24002.5	24431.5
High	Master Protein	P06787	Calmodulin OS=Saccharomyces cerevisiae (strain ATCC 204508 / S288c) OX=559292 GN=CMD1 PE=1 SV=1	1.022	0.03	0.637641	97	95	37733.7	46164.6	37969.5	37165.9	36874.7	39550.9	34229.5	40149.1	349.9	28626.2	35307.6	38136
High	Master Protein	Q03124	Chromatin structure-remodeling complex subunit RSC9 OS=Saccharomyces cerevisiae (strain ATCC 204508 / S288c) OX=559292 GN=RSC9 PE=1 SV=1	0.937	-0.09	0.96032	96.9	103.3	15524.1	15797.5	18534.1	16852	17304.9	16659.7	14082.5	13739	170.8	12979.9	16569.4	16063.7
High	Master Protein	Q02486	ARS-binding factor 2, mitochondrial OS=Saccharomyces cerevisiae (strain ATCC 204508 / S288c) OX=559292 GN=ABF2 PE=1 SV=1	1.083	0.11	0.283674	88.8	82	41832.2	41965.1	65173.7	39623.2	38761.1	38332.9	37947.4	36496.7	600.6	30518.9	37113.8	36961.5
High	Master Protein	P36060	NADH-cytochrome b5 reductase 2 OS=Saccharomyces cerevisiae (strain ATCC 204508 / S288c) OX=559292 GN=MCR1 PE=1 SV=1	1.754	0.81	3.38971e-07	116.8	66.6	38292	38508.6	38782.2	22880.5	21958.4	21328.1	34735.9	33490.6	357.4	17623.2	21025.2	20565.1
High	Master Protein	P41911	Glycerol-3-phosphate dehydrogenase [NAD(+)] 2, mitochondrial OS=Saccharomyces cerevisiae (strain ATCC 204508 / S288c) OX=559292 GN=GPD2 PE=1 SV=2	0.933	-0.1	0.0862007	97.1	104	15319.9	14184	15330.5	16720.7	16415.3	15746.7	13897.2	12335.7	141.3	12878.8	15717.7	15183.3
High	Master Protein	P32485	Mitogen-activated protein kinase HOG1 OS=Saccharomyces cerevisiae (strain ATCC 204508 / S288c) OX=559292 GN=HOG1 PE=1 SV=2	0.992	-0.01	0.563993	92.2	93	10288.5	10445.5	14184.4	10532.1	10626.7	9632	9333.1	9084.4	130.7	8112.1	10175.1	9287.4
High	Master Protein	P53868	Alpha-1,2-mannosyltransferase ALG9 OS=Saccharomyces cerevisiae (strain ATCC 204508 / S288c) OX=559292 GN=ALG9 PE=1 SV=1	0.997	0	0.64183	95	95.2	7492	7328.1	10231.7	7529.7	7514.1	7240.9	6796.2	6373.2	94.3	5799.6	7194.8	6981.9
High	Master Protein	P04821	Cell division control protein 25 OS=Saccharomyces cerevisiae (strain ATCC 204508 / S288c) OX=559292 GN=CDC25 PE=1 SV=1	1.761	0.82	0.0078829	139	78.9	14473.8	15690.2	18123.5	8636.9	8907.3	11380.2	13129.6	13645.6	167	6652.4	8528.8	10973.1
High	Master Protein	P36018	GTP-binding protein YPT52 OS=Saccharomyces cerevisiae (strain ATCC 204508 / S288c) OX=559292 GN=YPT52 PE=1 SV=1	1.325	0.41	0.00872325	107.6	81.2	20130	21967	27072.6	16676.8	16573.8	16046.2	18260.6	19104.5	249.5	12844.9	15869.4	15472.2
High	Master Protein	Q12443	Reticulon-like protein 2 OS=Saccharomyces cerevisiae (strain ATCC 204508 / S288c) OX=559292 GN=RTN2 PE=1 SV=1	1.502	0.59	0.0040013	79	52.6	9204.7	10039.3	7576.2	6248	5777	6128.8	8349.9	8731.1	69.8	4812.4	5531.5	5909.6
High	Master Protein	P48836	V-type proton ATPase subunit G OS=Saccharomyces cerevisiae (strain ATCC 204508 / S288c) OX=559292 GN=VMA10 PE=1 SV=1	1.244	0.31	0.0300632	115.6	92.9	54969.7	53338.3	48431.7	39387	42887.1	45480.9	49864.8	46388	446.3	30336.9	41064.5	43853.8
High	Master Protein	P38071	Enoyl-[acyl-carrier-protein] reductase, mitochondrial OS=Saccharomyces cerevisiae (strain ATCC 204508 / S288c) OX=559292 GN=ETR1 PE=1 SV=3	1.143	0.19	0.266429	92.8	81.2	18617.8	20147.5	15815.3	15838.2	16473.8	16284.5	16888.8	17522.2	145.7	12199	15773.7	15701.9
High	Master Protein	P38328	Actin-related protein 2/3 complex subunit 1 OS=Saccharomyces cerevisiae (strain ATCC 204508 / S288c) OX=559292 GN=ARC40 PE=1 SV=1	1.213	0.28	0.56488	98.9	81.5	21226.5	21375.3	15589.1	17494.4	17502.5	16666.6	19255.3	18590	143.7	13474.7	16758.7	16070.4
High	Master Protein	P01119	Ras-like protein 1 OS=Saccharomyces cerevisiae (strain ATCC 204508 / S288c) OX=559292 GN=RAS1 PE=1 SV=2	0.971	-0.04	0.373541	98.1	101	10318.9	10509.2	10752.2	10824.3	10992.3	10780.3	9360.6	9139.8	99.1	8337.2	10525.2	10394.6
High	Master Protein	P38149	Probable di- and tripeptidase DUG2 OS=Saccharomyces cerevisiae (strain ATCC 204508 / S288c) OX=559292 GN=DUG2 PE=1 SV=1	1.013	0.02	0.608682	97.7	96.5	8051	8328.8	12613.6	8220	8347	8020.4	7303.4	7243.5	116.2	6331.3	7992.2	7733.4
High	Master Protein	Q06681	Membrane-anchored lipid-binding protein YSP2 OS=Saccharomyces cerevisiae (strain ATCC 204508 / S288c) OX=559292 GN=YSP2 PE=1 SV=1	0.963	-0.05	0.664478	97.9	101.7	3692.6	3638.4	3651.8	3887.4	3793.7	3628.7	3349.6	3164.3	33.7	2994.2	3632.5	3498.9
High	Master Protein	P40302	Proteasome subunit alpha type-6 OS=Saccharomyces cerevisiae (strain ATCC 204508 / S288c) OX=559292 GN=PRE5 PE=1 SV=1	1.18	0.24	0.271867	99.2	84.1	31248.5	33157.1	26297.6	26225.2	27733.5	26480.9	28346.6	28836.5	242.3	20199.4	26554.9	25533.5
High	Master Protein	P46995	Histone-lysine N-methyltransferase, H3 lysine-36 specific OS=Saccharomyces cerevisiae (strain ATCC 204508 / S288c) OX=559292 GN=SET2 PE=1 SV=2	0.715	-0.48	0.810695	81.2	113.6	3218.9	3351.3	6194.8	4963.7	4685.9	4450.4	2919.9	2914.6	57.1	3823.2	4486.7	4291.2
High	Master Protein	Q06132	Suppressor of glycerol defect protein 1 OS=Saccharomyces cerevisiae (strain ATCC 204508 / S288c) OX=559292 GN=SGD1 PE=1 SV=1	0.951	-0.07	0.574497	101.6	106.8	6510	6649.9	6540.7	6913.4	6878.3	6474.4	5905.5	5783.4	60.3	5324.9	6586	6242.8
High	Master Protein	P38986	L-asparaginase 1 OS=Saccharomyces cerevisiae (strain ATCC 204508 / S288c) OX=559292 GN=ASP1 PE=1 SV=1	0.892	-0.17	0.0751254	95.5	107.1	19697.6	19405.4	19259	21759.4	22033	20447.9	17868.3	16876.8	177.5	16759.7	21096.6	19716.4
High	Master Protein	Q01802	Aspartate aminotransferase, mitochondrial OS=Saccharomyces cerevisiae (strain ATCC 204508 / S288c) OX=559292 GN=AAT1 PE=1 SV=2	0.836	-0.26	0.338476	86.8	103.9	7391.9	7380.3	9203.6	9477.6	8841.7	8575.3	6705.5	6418.6	84.8	7299.9	8466	8268.5
High	Master Protein	P36152	Fe-S cluster assembly protein DRE2 OS=Saccharomyces cerevisiae (strain ATCC 204508 / S288c) OX=559292 GN=DRE2 PE=1 SV=1	0.754	-0.41	0.577173	95.2	126.2	15983.8	15507.8	24182.1	20732.8	21219	21202.2	14499.5	13487	222.8	15968.9	20317.2	20443.7
High	Master Protein	Q05567	Sphingosine-1-phosphate lyase OS=Saccharomyces cerevisiae (strain ATCC 204508 / S288c) OX=559292 GN=DPL1 PE=1 SV=1	1.136	0.18	0.0124411	99	87.2	14828.6	14920.5	14298.1	12702.3	13056.8	13262.2	13451.5	12976.2	131.8	9783.7	12501.9	12787.7
High	Master Protein	Q05468	Ribosome quality control complex subunit 1 OS=Saccharomyces cerevisiae (strain ATCC 204508 / S288c) OX=559292 GN=RQC1 PE=1 SV=1	1.014	0.02	0.539883	97.9	96.5	6960.3	6891.1	9144.5	7123.3	6861	6535.1	6313.9	5993.1	84.3	5486.6	6569.4	6301.3
High	Master Protein	P02406	60S ribosomal protein L28 OS=Saccharomyces cerevisiae (strain ATCC 204508 / S288c) OX=559292 GN=RPL28 PE=1 SV=3	0.66	-0.6	0.00196528	80.6	122.2	72042.7	68455.1	84580.9	110933	109235	101785	65352.3	59535	779.4	85443.3	104593	98144
High	Master Protein	P50101	Ubiquitin carboxyl-terminal hydrolase 15 OS=Saccharomyces cerevisiae (strain ATCC 204508 / S288c) OX=559292 GN=UBP15 PE=1 SV=1	1.095	0.13	0.432602	93.9	85.8	6294.7	6669.1	5830.8	6130	5749.7	5565.7	5710.1	5800.1	53.7	4721.5	5505.3	5366.6
High	Master Protein	P11914	Mitochondrial-processing peptidase subunit alpha OS=Saccharomyces cerevisiae (strain ATCC 204508 / S288c) OX=559292 GN=MAS2 PE=1 SV=1	1.159	0.21	0.0129404	104.8	90.4	16574.3	17408.9	18568.7	15637.7	15014.3	14992.6	15035.1	15140.4	171.1	12044.6	14376.2	14456.3
High	Master Protein	Q12452	3-keto-steroid reductase OS=Saccharomyces cerevisiae (strain ATCC 204508 / S288c) OX=559292 GN=ERG27 PE=1 SV=1	1.404	0.49	0.082354	109	77.7	35931.5	33477.9	24732.7	24575.8	23851.5	23116	32594.7	29115.5	227.9	18928.9	22837.9	22289.1
High	Master Protein	P09457	ATP synthase subunit 5, mitochondrial OS=Saccharomyces cerevisiae (strain ATCC 204508 / S288c) OX=559292 GN=ATP5 PE=1 SV=1	1.016	0.02	0.828142	91.7	90.3	33126.8	36829.1	47586.4	36737.6	36255.3	35252.4	30050.4	32030	438.5	28296.3	34714.5	33991.3
High	Master Protein	P19881	4-nitrophenylphosphatase OS=Saccharomyces cerevisiae (strain ATCC 204508 / S288c) OX=559292 GN=PHO13 PE=1 SV=2	1.13	0.18	0.100052	96.4	85.3	17338.6	16336.7	17745.8	16129	13872	15343.1	15728.4	14207.9	163.5	12423	13282.5	14794.2
High	Master Protein	P27801	Vacuolar membrane protein PEP3 OS=Saccharomyces cerevisiae (strain ATCC 204508 / S288c) OX=559292 GN=PEP3 PE=1 SV=1	1.072	0.1	0.997762	98.9	92.3	4590.2	4686	3451.3	4370.5	4283.6	4134.8	4163.9	4075.4	31.8	3366.3	4101.5	3986.9
High	Master Protein	O14467	Multiprotein-bridging factor 1 OS=Saccharomyces cerevisiae (strain ATCC 204508 / S288c) OX=559292 GN=MBF1 PE=1 SV=2	1.721	0.78	0.000917269	99.7	57.9	90982.3	86178.6	71469.8	50873.7	44812.9	50065.6	82533.1	74949	658.6	39184.3	42908.4	48274.5
High	Master Protein	P32864	Rab proteins geranylgeranyltransferase component A OS=Saccharomyces cerevisiae (strain ATCC 204508 / S288c) OX=559292 GN=MRS6 PE=1 SV=2	1.115	0.16	0.680633	112.8	101.2	13920.6	13847.4	11796.3	12422.3	12790.1	12322.4	12627.8	12043	108.7	9568	12246.5	11881.6
High	Master Protein	P39743	Reduced viability upon starvation protein 167 OS=Saccharomyces cerevisiae (strain ATCC 204508 / S288c) OX=559292 GN=RVS167 PE=1 SV=1	1.409	0.49	0.511724	111.5	79.2	20978.7	20643.7	12879.6	15698.8	14653.5	14091.2	19030.5	17953.7	118.7	12091.6	14030.7	13587.1
High	Master Protein	P39708	NADP-specific glutamate dehydrogenase 2 OS=Saccharomyces cerevisiae (strain ATCC 204508 / S288c) OX=559292 GN=GDH3 PE=3 SV=1	1.06	0.08	0.277539	61.1	57.6	1520.8	1580.6	1512.8	1493.2	1330.2	1434.5	1379.6	1374.7	13.9	1150.1	1273.7	1383.1
High	Master Protein	P47061	Vacuolar protein sorting-associated protein 53 OS=Saccharomyces cerevisiae (strain ATCC 204508 / S288c) OX=559292 GN=VPS53 PE=1 SV=1	0.936	-0.1	0.207447	92.5	98.9	3034.7	3129.8	3108.4	3442.5	3321.8	3254.2	2752.9	2722	28.6	2651.5	3180.7	3137.8
High	Master Protein	P25719	Peptidyl-prolyl cis-trans isomerase C, mitochondrial OS=Saccharomyces cerevisiae (strain ATCC 204508 / S288c) OX=559292 GN=CPR3 PE=1 SV=1	1.391	0.48	0.941202	124.6	89.5	80204.3	83095.3	44918.5	56966.5	57643.1	69007	72756	72267.4	413.9	43877.2	55193.4	66538.3
High	Master Protein	P53075	Outer spore wall assembly protein SHE10 OS=Saccharomyces cerevisiae (strain ATCC 204508 / S288c) OX=559292 GN=SHE10 PE=1 SV=1	1.077	0.11	0.0578133	101.3	94.1	19102.6	19727.8	18734.2	17680.7	18333.5	17740	17328.6	17157.1	172.6	13618.2	17554.4	17105.3
High	Master Protein	Q05518	Protein PAL1 OS=Saccharomyces cerevisiae (strain ATCC 204508 / S288c) OX=559292 GN=PAL1 PE=1 SV=1	1.067	0.09	0.140391	102.6	96.2	4829.4	4972.8	4581.2	4599.2	4451.1	4525.3	4380.9	4324.8	42.2	3542.4	4262	4363.4
High	Master Protein	P21269	CCA tRNA nucleotidyltransferase, mitochondrial OS=Saccharomyces cerevisiae (strain ATCC 204508 / S288c) OX=559292 GN=CCA1 PE=1 SV=1	1.306	0.39	0.640591	113	86.5	10248.7	10392.2	6728.4	7844.5	7706.1	8003.9	9296.9	9038	62	6042.1	7378.6	7717.5
High	Master Protein	Q12518	Epsin-1 OS=Saccharomyces cerevisiae (strain ATCC 204508 / S288c) OX=559292 GN=ENT1 PE=1 SV=1	1.114	0.16	0.0862505	95.4	85.7	8678.7	8745.8	8901.4	8257.3	7853.9	7763.4	7872.7	7606.1	82	6360	7520.1	7485.7
High	Master Protein	P05373	Delta-aminolevulinic acid dehydratase OS=Saccharomyces cerevisiae (strain ATCC 204508 / S288c) OX=559292 GN=HEM2 PE=1 SV=2	0.968	-0.05	0.293249	102.8	106.2	19873.3	20361	17807	20474.4	20529.6	20724.3	18027.7	17707.9	164.1	15770	19657.2	19982.9
High	Master Protein	Q02201	Oxysterol-binding protein homolog 6 OS=Saccharomyces cerevisiae (strain ATCC 204508 / S288c) OX=559292 GN=OSH6 PE=1 SV=1	0.879	-0.19	0.929002	85.3	97	5236	5393	7059.5	6667.8	6134.8	5662.7	4749.7	4690.3	65.1	5135.7	5874	5460.1
High	Master Protein	P48445	Biotin--protein ligase OS=Saccharomyces cerevisiae (strain ATCC 204508 / S288c) OX=559292 GN=BPL1 PE=1 SV=1	0.895	-0.16	0.210585	92.1	102.9	3779.2	4015.6	4326.1	4380.7	4813.7	4488.6	3428.2	3492.3	39.9	3374.1	4609.1	4328
High	Master Protein	P53874	Ubiquitin carboxyl-terminal hydrolase 10 OS=Saccharomyces cerevisiae (strain ATCC 204508 / S288c) OX=559292 GN=UBP10 PE=1 SV=2	1.126	0.17	0.000245451	112.2	99.7	6709.8	6614.6	6522.4	5888.9	5794.9	5876.9	6086.7	5752.7	60.1	4535.8	5548.7	5666.6
High	Master Protein	P41819	Dimethyladenosine transferase OS=Saccharomyces cerevisiae (strain ATCC 204508 / S288c) OX=559292 GN=DIM1 PE=1 SV=1	1.111	0.15	0.194277	100.5	90.5	17334.9	18483.6	21340.1	15975.2	17359.1	16640.6	15725.1	16075.1	196.7	12304.5	16621.4	16045.3
High	Master Protein	P53064	RNA polymerase-associated protein RTF1 OS=Saccharomyces cerevisiae (strain ATCC 204508 / S288c) OX=559292 GN=RTF1 PE=1 SV=2	1.235	0.3	0.09197	110.1	89.1	17663.1	17574.9	14417.3	14228.5	14352.7	14204.2	16022.8	15284.8	132.9	10959.2	13742.8	13696
High	Master Protein	P06701	Regulatory protein SIR3 OS=Saccharomyces cerevisiae (strain ATCC 204508 / S288c) OX=559292 GN=SIR3 PE=1 SV=6	1.045	0.06	0.248995	94.4	90.3	3972	4414.6	3930.8	3925.9	3800.1	3688.1	3603.1	3839.3	36.2	3023.8	3638.6	3556.2
High	Master Protein	P38627	CTP synthase 2 OS=Saccharomyces cerevisiae (strain ATCC 204508 / S288c) OX=559292 GN=URA8 PE=1 SV=4	1.1	0.14	0.126855	91.9	83.5	5589.2	6472.5	5984.5	5619.8	5440.3	5345.1	5070.2	5629.1	55.1	4328.5	5209.1	5153.9
High	Master Protein	P54730	UBX domain-containing protein 4 OS=Saccharomyces cerevisiae (strain ATCC 204508 / S288c) OX=559292 GN=UBX4 PE=1 SV=1	1.213	0.28	6.10608e-05	105.6	87.1	10150.9	10359.8	10752.1	8398.6	8544	8597.5	9208.3	9009.9	99.1	6468.8	8180.9	8289.9
High	Master Protein	Q02648	tRNA (uracil-O(2)-)-methyltransferase OS=Saccharomyces cerevisiae (strain ATCC 204508 / S288c) OX=559292 GN=TRM44 PE=1 SV=1	0.932	-0.1	0.998438	94.5	101.5	6840.2	6837.9	8489.3	7644.8	7340.1	7271.9	6205	5946.9	78.2	5888.3	7028.1	7011.8
High	Master Protein	P09733	Tubulin alpha-1 chain OS=Saccharomyces cerevisiae (strain ATCC 204508 / S288c) OX=559292 GN=TUB1 PE=1 SV=2	0.681	-0.55	0.0017358	73.9	108.5	9845.9	10061.9	11265.4	15380.8	14782	13992.6	8931.6	8750.7	103.8	11846.7	14153.7	13492
High	Master Protein	P53751	Uncharacterized membrane glycoprotein YNR065C OS=Saccharomyces cerevisiae (strain ATCC 204508 / S288c) OX=559292 GN=YNR065C PE=4 SV=1	0.821	-0.28	0.173641	78.3	95.4	1077.6	1243.8	1083.5	1343.2	1319.9	1229.2	977.5	1081.7	10	1034.6	1263.8	1185.2
High	Master Protein	P52891	Nucleoporin NUP84 OS=Saccharomyces cerevisiae (strain ATCC 204508 / S288c) OX=559292 GN=NUP84 PE=1 SV=1	0.886	-0.18	0.010069	89.7	101.2	10907.6	11310.8	10760	12316.7	13007.7	12243.8	9894.6	9836.9	99.2	9486.7	12454.9	11805.7
High	Master Protein	Q04183	Trafficking protein particle complex II-specific subunit 120 OS=Saccharomyces cerevisiae (strain ATCC 204508 / S288c) OX=559292 GN=TRS120 PE=1 SV=1	0.967	-0.05	0.965612	99.9	103.3	4708.7	4987.5	6292	5275.9	5156.5	4902.1	4271.4	4337.6	58	4063.6	4937.4	4726.7
High	Master Protein	P39925	Mitochondrial respiratory chain complexes assembly protein AFG3 OS=Saccharomyces cerevisiae (strain ATCC 204508 / S288c) OX=559292 GN=AFG3 PE=1 SV=1	1.348	0.43	0.00342026	111.8	82.9	11564.9	12391.5	10077.9	8576.8	8893.8	8499.7	10490.9	10776.8	92.9	6606	8515.9	8195.6
High	Master Protein	P28000	DNA-directed RNA polymerases I and III subunit RPAC2 OS=Saccharomyces cerevisiae (strain ATCC 204508 / S288c) OX=559292 GN=RPC19 PE=1 SV=1	1.444	0.53	0.00494523	113.9	78.9	18309.4	21424	20716	14348.7	12436.4	14403.3	16609.1	18632.3	190.9	11051.8	11907.8	13888
High	Master Protein	Q07653	Protein HBT1 OS=Saccharomyces cerevisiae (strain ATCC 204508 / S288c) OX=559292 GN=HBT1 PE=1 SV=1	1.781	0.83	2.37569e-05	94.7	53.2	1818.4	2139.1	2023.3	1227.6	1125.4	1136	1649.5	1860.3	18.6	945.6	1077.6	1095.3
High	Master Protein	P52489	Pyruvate kinase 2 OS=Saccharomyces cerevisiae (strain ATCC 204508 / S288c) OX=559292 GN=PYK2 PE=1 SV=1	1.199	0.26	0.264788	94.2	78.6	6629.7	7247.9	5323.8	5597.9	5530.8	5293.8	6014	6303.4	49.1	4311.7	5295.7	5104.4
High	Master Protein	P46654	40S ribosomal protein S0-B OS=Saccharomyces cerevisiae (strain ATCC 204508 / S288c) OX=559292 GN=RPS0B PE=1 SV=2	0.62	-0.69	0.559742	78.7	126.8	15710.7	22335.7	12193.6	15132.4	25320	28798.9	14251.7	19425.2	112.4	11655.4	24243.9	27768.6
High	Master Protein	P48606	Tubulin-specific chaperone A OS=Saccharomyces cerevisiae (strain ATCC 204508 / S288c) OX=559292 GN=RBL2 PE=1 SV=1	1.179	0.24	0.147711	114.9	97.5	36548.1	41201.5	31712.9	30996.3	28749.8	32835.3	33154	35832.7	292.2	23874.2	27528	31660.7
High	Master Protein	P19263	Mediator of RNA polymerase II transcription subunit 14 OS=Saccharomyces cerevisiae (strain ATCC 204508 / S288c) OX=559292 GN=RGR1 PE=1 SV=2	1.018	0.03	0.282359	100.9	99.1	6174.3	5778.7	5717.4	5677	5712.2	5324	5600.9	5025.7	52.7	4372.6	5469.4	5133.5
High	Master Protein	P32905	40S ribosomal protein S0-A OS=Saccharomyces cerevisiae (strain ATCC 204508 / S288c) OX=559292 GN=RPS0A PE=1 SV=3	0.919	-0.12	0.362226	102.5	111.6	98826.3	90006.9	60871	97794.3	97991.9	103893	89648.7	78278.5	560.9	75323.9	93827.4	100176
High	Master Protein	Q07381	Ribosome biogenesis protein TSR1 OS=Saccharomyces cerevisiae (strain ATCC 204508 / S288c) OX=559292 GN=TSR1 PE=1 SV=1	0.968	-0.05	1	100.1	103.3	19795.2	19512.5	21780.8	19855	20738.8	20440	17956.9	16969.9	200.7	15292.9	19857.5	19708.8
High	Master Protein	P38693	Acid phosphatase PHO12 OS=Saccharomyces cerevisiae (strain ATCC 204508 / S288c) OX=559292 GN=PHO12 PE=1 SV=1	0.525	-0.93	0.0148882	67.1	127.9	16960.4	17578.7	27179.7	33510.2	31996.4	36003.4	15385.4	15288.1	250.5	25810.5	30636.6	34715.4
High	Master Protein	P40185	Protein MMF1, mitochondrial OS=Saccharomyces cerevisiae (strain ATCC 204508 / S288c) OX=559292 GN=MMF1 PE=1 SV=1	0.947	-0.08	0.99999	92.2	97.3	48384.6	49619.6	56691.2	52447	52402.7	49729.9	43891.3	43153.8	522.4	40396.1	50175.6	47950.8
High	Master Protein	P32335	Protein MSS51, mitochondrial OS=Saccharomyces cerevisiae (strain ATCC 204508 / S288c) OX=559292 GN=MSS51 PE=1 SV=2	1.234	0.3	2.45686e-05	103.2	83.6	21500.2	22778.7	21320.5	17420.7	17297.9	17770.7	19503.6	19810.5	196.5	13417.9	16562.7	17135
High	Master Protein	P34909	General negative regulator of transcription subunit 4 OS=Saccharomyces cerevisiae (strain ATCC 204508 / S288c) OX=559292 GN=MOT2 PE=1 SV=1	1.327	0.41	0.14375	119.3	89.9	8099.9	8354.9	20353.2	5970.3	6547.4	6296.1	7347.7	7266.2	187.6	4598.5	6269.1	6070.9
High	Master Protein	P38961	25S rRNA (adenine(645)-N(1))-methyltransferase OS=Saccharomyces cerevisiae (strain ATCC 204508 / S288c) OX=559292 GN=RRP8 PE=1 SV=2	1.117	0.16	0.000438714	107.4	96.2	14949.2	14853.6	15280.2	13386.3	13573.2	13305.2	13560.9	12918	140.8	10310.5	12996.3	12829.2
High	Master Protein	P23255	Transcription initiation factor TFIID subunit 2 OS=Saccharomyces cerevisiae (strain ATCC 204508 / S288c) OX=559292 GN=TAF2 PE=1 SV=3	1.208	0.27	0.0148735	116.7	96.6	7997.5	8072.1	8117.6	6681.8	6202.1	6840.6	7254.8	7020.2	74.8	5146.5	5938.5	6595.9
High	Master Protein	P17629	THO complex subunit HPR1 OS=Saccharomyces cerevisiae (strain ATCC 204508 / S288c) OX=559292 GN=HPR1 PE=1 SV=2	1.032	0.05	0.401968	105.9	102.6	4537.1	4536.2	5502.9	4507.9	4397	4374.8	4115.7	3945.1	50.7	3472.1	4210.1	4218.3
High	Master Protein	Q02630	Nucleoporin NUP116/NSP116 OS=Saccharomyces cerevisiae (strain ATCC 204508 / S288c) OX=559292 GN=NUP116 PE=1 SV=2	1.137	0.19	0.0485068	105.1	92.4	14129.6	14693.2	17596.6	12326.1	13204.8	12921.3	12817.4	12778.6	162.2	9493.9	12643.6	12459
High	Master Protein	P50896	Protein PSP1 OS=Saccharomyces cerevisiae (strain ATCC 204508 / S288c) OX=559292 GN=PSP1 PE=1 SV=2	1.432	0.52	0.325084	114.7	80.1	6065.9	6334.7	3953.8	4562.1	4235.9	4046.9	5502.6	5509.3	36.4	3513.9	4055.9	3902.1
High	Master Protein	P23776	Glucan 1,3-beta-glucosidase I/II OS=Saccharomyces cerevisiae (strain ATCC 204508 / S288c) OX=559292 GN=EXG1 PE=1 SV=1	2.183	1.13	0.0232831	136.8	62.7	25586.3	28672.7	14697.2	11720.3	11534.2	12443.5	23210.2	24936.5	135.4	9027.3	11044	11998.3
High	Master Protein	P08018	MAP kinase kinase PBS2 OS=Saccharomyces cerevisiae (strain ATCC 204508 / S288c) OX=559292 GN=PBS2 PE=1 SV=4	1.08	0.11	0.942832	104.7	97	5610.9	5683	3902.4	5197.3	5505.7	5104.3	5089.8	4942.4	36	4003.1	5271.7	4921.7
High	Master Protein	P40469	DNA repair/transcription protein MET18/MMS19 OS=Saccharomyces cerevisiae (strain ATCC 204508 / S288c) OX=559292 GN=MET18 PE=1 SV=1	0.819	-0.29	0.808365	88.6	108.2	5694.9	5921	8324.9	7330.4	7230.8	6842.5	5166	5149.5	76.7	5646.1	6923.5	6597.7
High	Master Protein	Q07979	Chromatin structure-remodeling complex protein RSC58 OS=Saccharomyces cerevisiae (strain ATCC 204508 / S288c) OX=559292 GN=RSC58 PE=1 SV=1	0.919	-0.12	0.976961	94.3	102.7	8406.7	8412.5	10133	9569.3	9157.3	8726.8	7626	7316.3	93.4	7370.6	8768.1	8414.6
High	Master Protein	P07560	Ras-related protein SEC4 OS=Saccharomyces cerevisiae (strain ATCC 204508 / S288c) OX=559292 GN=SEC4 PE=1 SV=1	1.081	0.11	0.884659	94.8	87.7	31659.6	29686.6	24948	26834	28178.9	27454	28719.5	25818.2	229.9	20668.3	26981.4	26471.9
High	Master Protein	Q06632	Protein CFT1 OS=Saccharomyces cerevisiae (strain ATCC 204508 / S288c) OX=559292 GN=CFT1 PE=1 SV=1	0.867	-0.21	0.663307	94.5	109	4260.5	4483.6	5754.8	5381.6	5161.2	5170.7	3864.8	3899.4	53	4145.1	4941.8	4985.7
High	Master Protein	P53081	NGG1-interacting factor 3 OS=Saccharomyces cerevisiae (strain ATCC 204508 / S288c) OX=559292 GN=NIF3 PE=1 SV=1	0.985	-0.02	0.995066	89.8	91.1	18265.8	16281.5	14606.8	17886.4	16522.8	15688	16569.5	14159.9	134.6	13776.6	15820.6	15126.8
High	Master Protein	P12684	3-hydroxy-3-methylglutaryl-coenzyme A reductase 2 OS=Saccharomyces cerevisiae (strain ATCC 204508 / S288c) OX=559292 GN=HMG2 PE=1 SV=1	1.42	0.51	0.0197533	114.8	80.8	5718.6	5518.4	4327.9	3887.2	3715.1	3916.4	5187.5	4799.3	39.9	2994	3557.2	3776.2
High	Master Protein	P14020	Dolichol-phosphate mannosyltransferase OS=Saccharomyces cerevisiae (strain ATCC 204508 / S288c) OX=559292 GN=DPM1 PE=1 SV=3	0.981	-0.03	0.992689	93.1	95	46902.5	42873.9	52074.5	49439	47812.2	46007.3	42546.8	37287.1	479.9	38079.2	45780.2	44361.4
High	Master Protein	P00331	Alcohol dehydrogenase 2 OS=Saccharomyces cerevisiae (strain ATCC 204508 / S288c) OX=559292 GN=ADH2 PE=1 SV=3	1.037	0.05	1	62.2	60	1037.2	1408.3	785.3	1179.2	999.7	975.3	940.9	1224.8	7.2	908.3	957.2	940.4
High	Master Protein	P50942	Polyphosphatidylinositol phosphatase INP52 OS=Saccharomyces cerevisiae (strain ATCC 204508 / S288c) OX=559292 GN=INP52 PE=1 SV=1	1.032	0.05	0.9211	103.8	100.5	3389.4	3590.2	4137.3	3854.5	3353.4	3477.2	3074.7	3122.4	38.1	2968.8	3210.9	3352.8
High	Master Protein	P08004	Chitin synthase 1 OS=Saccharomyces cerevisiae (strain ATCC 204508 / S288c) OX=559292 GN=CHS1 PE=1 SV=2	1.147	0.2	0.0661612	104.7	91.3	7456.4	7401.7	9345	6502.5	6681.1	6221.9	6763.9	6437.2	86.1	5008.4	6397.1	5999.3
High	Master Protein	P38912	Eukaryotic translation initiation factor 1A OS=Saccharomyces cerevisiae (strain ATCC 204508 / S288c) OX=559292 GN=TIF11 PE=1 SV=1	1.285	0.36	0.48044	119.7	93.2	56586	56617.4	40741.5	39660.6	44048.7	47870.5	51331	49239.8	375.4	30547.7	42176.7	46158
High	Master Protein	P50085	Prohibitin-2 OS=Saccharomyces cerevisiae (strain ATCC 204508 / S288c) OX=559292 GN=PHB2 PE=1 SV=2	1.226	0.29	0.00299154	98.5	80.3	23211.3	24837.8	25919.5	21563.3	20260	20021.7	21055.8	21601.3	238.9	16608.6	19399	19305.4
High	Master Protein	P25617	Uncharacterized protein YCR016W OS=Saccharomyces cerevisiae (strain ATCC 204508 / S288c) OX=559292 GN=YCR016W PE=1 SV=2	1.9	0.93	0.117402	162	85.3	20511.7	21239.2	10815.4	9656	10797.6	11578.3	18606.9	18471.6	99.7	7437.3	10338.7	11164.1
High	Master Protein	Q08446	Protein SGT1 OS=Saccharomyces cerevisiae (strain ATCC 204508 / S288c) OX=559292 GN=SGT1 PE=1 SV=1	1.103	0.14	0.920965	103.6	93.9	10150.8	10316.5	8247.2	9464.9	9201	8918.3	9208.2	8972.2	76	7290.1	8810	8599.2
High	Master Protein	P38789	Ribosome biogenesis protein SSF1 OS=Saccharomyces cerevisiae (strain ATCC 204508 / S288c) OX=559292 GN=SSF1 PE=1 SV=1	1.414	0.5	0.277167	121.7	86.1	6560.6	6525.6	4566.2	4603.1	4614.5	5192.3	5951.4	5675.3	42.1	3545.4	4418.4	5006.6
High	Master Protein	P53049	Oligomycin resistance ATP-dependent permease YOR1 OS=Saccharomyces cerevisiae (strain ATCC 204508 / S288c) OX=559292 GN=YOR1 PE=1 SV=1	0.827	-0.27	0.0507109	88.7	107.2	3474.2	3480.8	2623.1	4223.2	4199.9	4011.6	3151.5	3027.2	24.2	3252.8	4021.4	3868.1
High	Master Protein	Q06677	Auxilin-like clathrin uncoating factor SWA2 OS=Saccharomyces cerevisiae (strain ATCC 204508 / S288c) OX=559292 GN=SWA2 PE=1 SV=1	1.034	0.05	0.981513	98.5	95.3	5365.4	5794.8	4271.3	5187.4	5452.3	5084.7	4867.1	5039.7	39.4	3995.5	5220.6	4902.8
High	Master Protein	P16370	DNA-directed RNA polymerase II subunit RPB3 OS=Saccharomyces cerevisiae (strain ATCC 204508 / S288c) OX=559292 GN=RPB3 PE=1 SV=2	1.179	0.24	0.99253	111.5	94.6	21798.3	19305.5	12361.4	16256.4	16371.3	17564.7	19773.9	16789.9	113.9	12521.1	15675.6	16936.3
High	Master Protein	P52286	Suppressor of kinetochore protein 1 OS=Saccharomyces cerevisiae (strain ATCC 204508 / S288c) OX=559292 GN=SKP1 PE=1 SV=2	1.368	0.45	0.163171	121	88.5	28262.6	33096.8	20454.8	20661.5	19068.6	20995.9	25638	28784.1	188.5	15914.1	18258.2	20244.7
High	Master Protein	P38998	Saccharopine dehydrogenase [NAD(+), L-lysine-forming] OS=Saccharomyces cerevisiae (strain ATCC 204508 / S288c) OX=559292 GN=LYS1 PE=1 SV=3	1.831	0.87	0.062057	115.8	63.2	29749.8	28433.6	16630	15294.9	15580.6	15528.7	26987.1	24728.5	153.2	11780.6	14918.5	14973.2
High	Master Protein	P47133	ER membrane protein complex subunit 2 OS=Saccharomyces cerevisiae (strain ATCC 204508 / S288c) OX=559292 GN=EMC2 PE=1 SV=1	1.165	0.22	0.00234835	99.7	85.5	16197	16880.1	16417.5	13209.2	14564.5	14089.3	14692.9	14680.5	151.3	10174.1	13945.5	13585.3
High	Master Protein	P14180	Chitin synthase 2 OS=Saccharomyces cerevisiae (strain ATCC 204508 / S288c) OX=559292 GN=CHS2 PE=1 SV=1	0.848	-0.24	0.00929523	83.5	98.4	4750.6	4775.3	4949.7	5725.4	5631.2	5268.5	4309.4	4153	45.6	4409.9	5391.9	5080.1
High	Master Protein	Q02204	54S ribosomal protein L13, mitochondrial OS=Saccharomyces cerevisiae (strain ATCC 204508 / S288c) OX=559292 GN=MRPL13 PE=1 SV=2	1.52	0.6	0.00114269	124.3	81.8	11122.2	11460.6	9283.5	7410.5	6980.7	7316.2	10089.4	9967.2	85.5	5707.8	6684	7054.5
High	Master Protein	P35177	Transcriptional activator SPT7 OS=Saccharomyces cerevisiae (strain ATCC 204508 / S288c) OX=559292 GN=SPT7 PE=1 SV=1	1.102	0.14	0.00912946	104.4	94.7	4349	4368	4723.1	4081.1	3892.2	3962.4	3945.1	3798.8	43.5	3143.4	3726.8	3820.7
High	Master Protein	P48361	Activator of SKN7 protein 10 OS=Saccharomyces cerevisiae (strain ATCC 204508 / S288c) OX=559292 GN=ASK10 PE=1 SV=2	1.188	0.25	0.0109906	106	89.3	8492.5	9202.4	10054.7	7426.9	7749.2	7772.9	7703.8	8003.2	92.7	5720.4	7419.8	7494.8
High	Master Protein	Q04600	Translation machinery-associated protein 64 OS=Saccharomyces cerevisiae (strain ATCC 204508 / S288c) OX=559292 GN=TMA64 PE=1 SV=1	1.067	0.09	0.130789	101.1	94.8	8819.6	9353.4	9412.7	8769.7	8771.6	8471.3	8000.5	8134.6	86.7	6754.7	8398.8	8168.2
High	Master Protein	Q08229	Protein NBA1 OS=Saccharomyces cerevisiae (strain ATCC 204508 / S288c) OX=559292 GN=NBA1 PE=1 SV=1	1.193	0.25	0.127914	103.3	86.6	7265.6	7422.1	12475.4	6256.5	6219.7	6069.5	6590.9	6454.9	115	4818.9	5955.4	5852.4
High	Master Protein	Q03661	Silent chromatin protein ESC1 OS=Saccharomyces cerevisiae (strain ATCC 204508 / S288c) OX=559292 GN=ESC1 PE=1 SV=1	1.229	0.3	0.894913	103.8	84.4	3564.2	3717	2306.9	2813.8	2900.5	2935.3	3233.2	3232.7	21.3	2167.3	2777.2	2830.2
High	Master Protein	Q06287	Ribosomal RNA small subunit methyltransferase NEP1 OS=Saccharomyces cerevisiae (strain ATCC 204508 / S288c) OX=559292 GN=EMG1 PE=1 SV=1	1.026	0.04	0.568021	91.5	89.1	10067.1	10124.7	14319.9	10564	9866.9	9557.9	9132.2	8805.3	132	8136.6	9447.6	9215.9
High	Master Protein	P30902	ATP synthase subunit d, mitochondrial OS=Saccharomyces cerevisiae (strain ATCC 204508 / S288c) OX=559292 GN=ATP7 PE=1 SV=2	1.136	0.18	0.00740778	97.8	86.1	30887.5	34123.6	32580.2	29385	28606.6	28683.3	28019.1	29677.1	300.2	22633.1	27390.8	27657.1
High	Master Protein	P14164	ARS-binding factor 1 OS=Saccharomyces cerevisiae (strain ATCC 204508 / S288c) OX=559292 GN=ABF1 PE=1 SV=4	0.981	-0.03	0.498472	100.6	102.6	8752.7	9247.6	9114.1	9294.4	9403.2	9217.1	7939.9	8042.6	84	7158.8	9003.6	8887.3
High	Master Protein	P41818	Protein GLC8 OS=Saccharomyces cerevisiae (strain ATCC 204508 / S288c) OX=559292 GN=GLC8 PE=1 SV=1	1.813	0.86	0.0730496	132.7	73.2	24816.1	26438.2	15722.9	13675.4	13687.5	16056.6	22511.5	22993.2	144.9	10533.2	13105.8	15482.1
High	Master Protein	P32179	3'(2'),5'-bisphosphate nucleotidase OS=Saccharomyces cerevisiae (strain ATCC 204508 / S288c) OX=559292 GN=MET22 PE=1 SV=1	0.913	-0.13	0.0348438	105.9	116	13256.5	12366.3	13291.6	15422.6	14192.1	14521.3	12025.4	10754.9	122.5	11878.9	13589	14001.8
High	Master Protein	P05374	Phosphatidylethanolamine N-methyltransferase OS=Saccharomyces cerevisiae (strain ATCC 204508 / S288c) OX=559292 GN=CHO2 PE=1 SV=1	1.096	0.13	0.994941	102.3	93.3	16410.1	16879.7	12965.8	14966	15645.5	14600.2	14886.2	14680.2	119.5	11527.2	14980.6	14077.8
High	Master Protein	P24521	Phosphomevalonate kinase OS=Saccharomyces cerevisiae (strain ATCC 204508 / S288c) OX=559292 GN=ERG8 PE=1 SV=2	1.269	0.34	0.150786	117.4	92.5	15923.3	15813.3	12281.9	12537.5	12459.2	12236.2	14444.6	13752.7	113.2	9656.7	11929.7	11798.5
High	Master Protein	P00812	Arginase OS=Saccharomyces cerevisiae (strain ATCC 204508 / S288c) OX=559292 GN=CAR1 PE=1 SV=1	1.785	0.84	0.0808393	132.4	74.1	36139	36825.9	21403.9	21172.2	20073.9	20241.6	32782.9	32027.2	197.2	16307.4	19220.8	19517.5
High	Master Protein	P17106	Centromere-binding protein 1 OS=Saccharomyces cerevisiae (strain ATCC 204508 / S288c) OX=559292 GN=CBF1 PE=1 SV=2	0.767	-0.38	0.157608	100.5	130.9	11148.5	12344	15659.3	16085.1	15041.3	16378.6	10113.1	10735.5	144.3	12389.2	14402.1	15792.7
High	Master Protein	P53114	Mediator of RNA polymerase II transcription subunit 5 OS=Saccharomyces cerevisiae (strain ATCC 204508 / S288c) OX=559292 GN=NUT1 PE=1 SV=1	1.078	0.11	0.967018	102	94.7	6190.7	6573.9	5146.8	5744.5	6025.7	5556.8	5615.8	5717.3	47.4	4424.6	5769.6	5358
High	Master Protein	P25342	Cell division control protein 10 OS=Saccharomyces cerevisiae (strain ATCC 204508 / S288c) OX=559292 GN=CDC10 PE=1 SV=1	1.394	0.48	0.788292	119.7	85.8	35150	33814.7	18322.8	24468.2	24250.3	23427.4	31885.8	29408.4	168.8	18846.1	23219.7	22589.3
High	Master Protein	P40357	Protein transport protein SEC9 OS=Saccharomyces cerevisiae (strain ATCC 204508 / S288c) OX=559292 GN=SEC9 PE=1 SV=1	1.508	0.59	0.610288	121.2	80.3	3716.2	3834.6	1962.8	2463.5	2453.8	2470.8	3371.1	3334.9	18.1	1897.5	2349.5	2382.4
High	Master Protein	Q06146	Uncharacterized protein YLR257W OS=Saccharomyces cerevisiae (strain ATCC 204508 / S288c) OX=559292 GN=YLR257W PE=1 SV=1	1.335	0.42	0.24866	123.6	92.6	26205	29794.3	19799.1	19611.7	19630.3	22064.3	23771.4	25911.9	182.5	15105.5	18796	21274.9
High	Master Protein	P40467	Activator of stress genes 1 OS=Saccharomyces cerevisiae (strain ATCC 204508 / S288c) OX=559292 GN=ASG1 PE=1 SV=1	1.119	0.16	0.0352797	109	97.4	7151.7	7365.7	7857.7	6919.4	6583.3	6351.5	6487.6	6405.9	72.4	5329.5	6303.5	6124.3
High	Master Protein	P38063	Ribose-phosphate pyrophosphokinase 4 OS=Saccharomyces cerevisiae (strain ATCC 204508 / S288c) OX=559292 GN=PRS4 PE=1 SV=3	0.982	-0.03	0.763502	96.7	98.4	8240.8	8237.6	11354	8390	8646.7	8310.8	7475.5	7164.2	104.6	6462.2	8279.2	8013.4
High	Master Protein	P33767	Dolichyl-diphosphooligosaccharide--protein glycosyltransferase subunit WBP1 OS=Saccharomyces cerevisiae (strain ATCC 204508 / S288c) OX=559292 GN=WBP1 PE=1 SV=1	1.01	0.01	0.994358	95.5	94.6	27723.8	24836.6	22045.6	24601.1	24657.1	24111.5	25149.2	21600.3	203.2	18948.4	23609.2	23248.9
High	Master Protein	Q12434	Rho GDP-dissociation inhibitor OS=Saccharomyces cerevisiae (strain ATCC 204508 / S288c) OX=559292 GN=RDI1 PE=1 SV=1	1.13	0.18	0.00990179	106.1	93.9	15277.5	16252.8	14492.9	13523.7	13312.4	13805.5	13858.7	14134.9	133.6	10416.3	12746.7	13311.6
High	Master Protein	P06780	GTP-binding protein RHO1 OS=Saccharomyces cerevisiae (strain ATCC 204508 / S288c) OX=559292 GN=RHO1 PE=1 SV=3	1.138	0.19	0.973182	94	82.6	23618.9	24722.6	16679.2	20978.5	20763.4	19822.1	21425.5	21501.1	153.7	16158.2	19880.9	19113
High	Master Protein	Q12276	HMG2-induced ER-remodeling protein 1 OS=Saccharomyces cerevisiae (strain ATCC 204508 / S288c) OX=559292 GN=HER1 PE=1 SV=1	1.098	0.14	0.864196	92.9	84.6	3912.7	4034.7	3808.1	4104.8	3471.8	3562.3	3549.3	3509	35.1	3161.6	3324.2	3434.8
High	Master Protein	P38922	Protein HRB1 OS=Saccharomyces cerevisiae (strain ATCC 204508 / S288c) OX=559292 GN=HRB1 PE=1 SV=2	1.322	0.4	0.174289	114.1	86.3	12772.8	12915.5	9443.7	9659.7	9554	9683.5	11586.6	11232.5	87	7440.2	9148	9337
High	Master Protein	Q05040	Factor arrest protein 8 OS=Saccharomyces cerevisiae (strain ATCC 204508 / S288c) OX=559292 GN=FAR8 PE=1 SV=1	1.429	0.51	0.0080867	113.2	79.2	6945.6	7150	5659	5067.2	4821.1	4861.5	6300.6	6218.3	52.1	3902.9	4616.3	4687.6
High	Master Protein	P0C2H8	60S ribosomal protein L31-A OS=Saccharomyces cerevisiae (strain ATCC 204508 / S288c) OX=559292 GN=RPL31A PE=1 SV=1	0.821	-0.28	0.000661309	93.7	114.1	84341	83569.2	77759.2	108820	99080.9	101745	76508.5	72679.6	716.6	83815.9	94870.1	98105
High	Master Protein	P22517	Calcium/calmodulin-dependent protein kinase II OS=Saccharomyces cerevisiae (strain ATCC 204508 / S288c) OX=559292 GN=CMK2 PE=1 SV=2	1.353	0.44	0.601926	96.9	71.6	10660.1	11283.3	9074.9	7879.8	7606.8	11578.7	9670.1	9813	83.6	6069.2	7283.5	11164.5
High	Master Protein	P32478	Cell wall mannoprotein HSP150 OS=Saccharomyces cerevisiae (strain ATCC 204508 / S288c) OX=559292 GN=HSP150 PE=1 SV=2	2.353	1.23	0.00258821	135.2	57.4	25983.4	26220.7	16823.7	10348.1	11042.7	11757.4	23570.4	22804	155	7970.4	10573.4	11336.8
High	Master Protein	Q12159	RNA annealing protein YRA1 OS=Saccharomyces cerevisiae (strain ATCC 204508 / S288c) OX=559292 GN=YRA1 PE=1 SV=2	0.906	-0.14	0.0760428	97.8	107.9	58896.8	53491.9	62488.2	67439.6	63428.8	65021.2	53427.2	46521.5	575.8	51943.8	60733.1	62695
High	Master Protein	P32467	Low-affinity glucose transporter HXT4 OS=Saccharomyces cerevisiae (strain ATCC 204508 / S288c) OX=559292 GN=HXT4 PE=1 SV=1	1.123	0.17	0.254786	92.1	82	8610.8	7980.5	13392.4	7666.5	7834.3	6986.1	7811.1	6940.6	123.4	5905	7501.4	6736.1
High	Master Protein	Q03771	Assembly chaperone of RPL4 OS=Saccharomyces cerevisiae (strain ATCC 204508 / S288c) OX=559292 GN=ACL4 PE=1 SV=1	1.037	0.05	0.374492	106.6	102.8	12953.2	12115.7	12540.4	12096.4	11012.7	12285.4	11750.3	10536.9	115.6	9317	10544.7	11845.9
High	Master Protein	P47122	GPN-loop GTPase 1 OS=Saccharomyces cerevisiae (strain ATCC 204508 / S288c) OX=559292 GN=NPA3 PE=1 SV=1	1.13	0.18	0.367089	107.4	95	20759.1	20714.9	17762.3	17729.9	18336.5	18635.6	18831.3	18015.6	163.7	13656	17557.3	17968.9
High	Master Protein	P46151	Methylenetetrahydrofolate reductase 1 OS=Saccharomyces cerevisiae (strain ATCC 204508 / S288c) OX=559292 GN=MET12 PE=1 SV=2	0.96	-0.06	0.629918	100.1	104.3	12289.4	12864.5	13552.1	13404.4	13690.5	13119	11148.1	11188.1	124.9	10324.4	13108.7	12649.6
High	Master Protein	Q12168	Endo-1,3(4)-beta-glucanase 2 OS=Saccharomyces cerevisiae (strain ATCC 204508 / S288c) OX=559292 GN=ACF2 PE=1 SV=1	1.177	0.23	0.999999	101.6	86.3	6722.9	7086.9	4016.5	5850.2	5713.7	5692.7	6098.6	6163.4	37	4506	5470.8	5489
High	Master Protein	Q08971	Protein PBDC1 homolog OS=Saccharomyces cerevisiae (strain ATCC 204508 / S288c) OX=559292 GN=YPL225W PE=1 SV=1	1.37	0.45	0.00540959	98.8	72.1	42630.8	45254.6	44606.7	32549.9	30841.2	34562.4	38671.9	39357.6	411.1	25070.8	29530.5	33325.9
High	Master Protein	P45978	Protein SCD6 OS=Saccharomyces cerevisiae (strain ATCC 204508 / S288c) OX=559292 GN=SCD6 PE=1 SV=1	1.236	0.31	0.00200139	114.1	92.4	10970.2	11403.5	10092.2	8234	8932.8	8876.7	9951.4	9917.6	93	6342	8553.2	8559.2
High	Master Protein	P38825	Protein TOM71 OS=Saccharomyces cerevisiae (strain ATCC 204508 / S288c) OX=559292 GN=TOM71 PE=1 SV=1	1.071	0.1	0.837198	102.3	95.6	15414	15717.5	13675.8	14885.1	14151.4	14394.9	13982.5	13669.4	126	11464.9	13550	13879.9
High	Master Protein	P15496	Isopentenyl-diphosphate Delta-isomerase OS=Saccharomyces cerevisiae (strain ATCC 204508 / S288c) OX=559292 GN=IDI1 PE=1 SV=2	1.328	0.41	0.109987	122.5	92.2	26903	30170.1	57038.5	22720.2	19876.7	23206.9	24404.6	26238.7	525.6	17499.7	19032	22376.7
High	Master Protein	P38629	Replication factor C subunit 3 OS=Saccharomyces cerevisiae (strain ATCC 204508 / S288c) OX=559292 GN=RFC3 PE=1 SV=1	0.967	-0.05	0.894547	91.2	94.4	10983.9	11276.3	12210.9	12181	11666.2	11409.2	9963.9	9806.9	112.5	9382.1	11170.4	11001
High	Master Protein	P38755	Oxysterol-binding protein homolog 7 OS=Saccharomyces cerevisiae (strain ATCC 204508 / S288c) OX=559292 GN=OSH7 PE=1 SV=1	1.142	0.19	0.0608039	101.3	88.7	11017.3	11750.9	13890.6	10445.9	10285.9	10009.6	9994.1	10219.6	128	8045.7	9848.8	9651.5
High	Master Protein	P47057	Sorting nexin-4 OS=Saccharomyces cerevisiae (strain ATCC 204508 / S288c) OX=559292 GN=SNX4 PE=1 SV=1	1.127	0.17	0.44072	97.5	86.5	4532.2	4904.1	3870.5	3968.8	4132.3	4021.2	4111.3	4265	35.7	3056.9	3956.7	3877.3
[truncated: 3,481 more rows]
