# Supplementary material for: Decapping factor Dcp2 controls mRNA abundance and translation to adjust metabolism and filamentation to nutrient availability
Source: eLife journal article supplement (doi:10.7554/elife.85545), 2023-06-02
Supplement: fig4-figsupp1-data2 [file Figure 4 – figure supplement 1 – source data 2.xlsx]

## Sheet: Sheet1
Gene_ID	protein abundance_dcp2 vs WT			gene_ID	ribo_dcp2 vs WT
YOR293W	3.1			YAL067C	-1.70936
YHR087W	2.92			YAL063C-A	-4.30491
YFL014W	2.28			YAL063C	1.80022
YBR162W-A	2.19			YAL054C	2.84383
YOR202W	2.17			YAL049C	0.109723
YLL018C-A	2.12			YAL047C	-0.202548
YGL108C	2.06			YAL046C	-0.0169673
YHL024W	1.97			YAL044C	0.548718
YGR161C	1.89			YAL043C	-0.123803
YCL040W	1.84			YAL040C	-1.0718
YHR194W	1.73			YAL039C	0.039552
YOR305W	1.69			YAL036C	-0.482629
YNL009W	1.67			YAL034C	2.19161
YER162C	1.64			YAL032C	-0.30967
YEL039C	1.63			YAL031C	-0.564788
YER067W	1.56			YAL029C	-0.839207
YCL067C	1.54			YAL026C-A	-0.930647
YGL037C	1.5			YAL026C	-0.326452
YLR376C	1.47			YAL025C	-0.240461
YJL166W	1.41			YAL024C	-0.837749
YKL096W	1.39			YAL023C	-1.48346
YMR003W	1.35			YAL022C	-0.5367
YDR242W	1.34			YAL021C	-0.332492
YLR363C	1.33			YAL020C	-0.47563
YKR046C	1.31			YAL015C	0.743093
YKL161C	1.3			YAL014C	0.324342
YCR076C	1.29			YAL010C	0.178135
YHR059W	1.28			YAL007C	-0.881309
YBL075C	1.26			YAL005C	-0.0277284
YCR015C	1.26			YAL001C	0.106685
YPR160W	1.26			YAR002C-A	-0.65879
YDL079C	1.25			YAR007C	-0.0554335
YDR479C	1.24			YAR014C	-0.184013
YLL019C	1.23			YAR018C	0.303471
YJL159W	1.23			YAR019C	-0.392837
YGR008C	1.22			YAR023C	-0.3143
YDL130W-A	1.22			YAL064W-B	-2.69168
YDR003W	1.22			YAL062W	1.14938
YNR034W-A	1.2			YAL061W	3.93246
YMR056C	1.17			YAL060W	0.719135
YCR075W-A	1.16			YAL059W	-0.146893
YDL085C-A	1.16			YAL058W	-0.642891
YOR120W	1.14			YAL056W	-0.399655
YKL195W	1.14			YAL055W	0.16077
YLR154W-C	1.13			YAL053W	0.320399
YOR304C-A	1.13			YAL051W	-0.201869
YKL023W	1.11			YAL044W-A	0.136986
YER175C	1.11			YAL042W	-0.805722
YPL107W	1.1			YAL041W	-0.593603
YER053C	1.08			YAL038W	-1.10156
YHR209W	1.07			YAL037W	0.491989
YKL218C	1.07			YAL035W	-0.266021
YFR053C	1.05			YAL034W-A	-0.361031
YOR136W	1.05			YAL033W	-0.207616
YER015W	1.05			YAL030W	0.1341
YER054C	1.04			YAL028W	1.15726
YJL057C	1.04			YAL027W	0.629408
YOL159C	1.03			YAL019W	-0.414342
YNL328C	1.02			YAL017W	0.675624
YDR342C	1			YAL016W	0.25312
YML128C	1			YAL013W	-0.336717
YOR079C	0.97			YAL012W	-0.666043
YBR085C-A	0.96			YAL011W	0.40773
YCL024W	0.94			YAL009W	-0.49737
YGR254W	0.94			YAL008W	0.334713
YGR174C	0.94			YAL004W	-5.40025
YIL136W	0.93			YAL003W	-1.14329
YDR265W	0.93			YAL002W	-0.215697
YPL257W	0.93			YAR002W	-0.438884
YEL060C	0.92			YAR003W	-0.304246
YGR127W	0.91			YAR008W	-0.540757
YLR079W	0.91			YAR015W	0.499652
YCR068W	0.91			YAR019W-A	-0.671716
YJL065C	0.91			YAR027W	0.510649
YDR252W	0.91			YAR028W	0.469751
YLR016C	0.91			YAR029W	-1.66949
YOL067C	0.9			YAR031W	0.498872
YOR374W	0.9			YAR033W	0.143972
YJR008W	0.9			YAR035W	0.756306
YGR088W	0.89			YAR042W	-0.0171085
YLR327C	0.89			YAR050W	1.30295
YBL089W	0.88			YAR071W	-3.31225
YIL116W	0.88			YBL113C	-0.101269
YPL127C	0.88			YBL107C	0.0695251
YCR083W	0.87			YBL106C	-0.653724
YDL124W	0.87			YBL105C	-0.00732941
YNL015W	0.86			YBL104C	-0.0609417
YER083C	0.86			YBL103C	0.605128
YIL006W	0.85			YBL101C	-0.0728645
YIL156W-B	0.85			YBL093C	-0.090182
YDL123W	0.85			YBL091C-A	1.15144
YKL053C-A	0.85			YBL091C	-0.0233866
YCL056C	0.85			YBL088C	0.0296557
YBL078C	0.84			YBL087C	-0.637143
YDR216W	0.84			YBL086C	0.403597
YFR003C	0.84			YBL084C	-0.632288
YCL033C	0.84			YBL080C	0.702718
YDR516C	0.83			YBL078C	2.25909
YKR080W	0.83			YBL076C	-0.746976
YDL223C	0.83			YBL075C	4.70151
YCR067C	0.83			YBL074C	1.09662
YMR174C	0.83			YBL072C	-0.856251
YCL061C	0.82			YBL070C	-4.66659
YDR055W	0.82			YBL067C	-0.938237
YLR310C	0.82			YBL066C	-0.150649
YBL091C-A	0.82			YBL064C	1.88027
YKL150W	0.81			YBL061C	-0.191564
YMR315W	0.81			YBL059C-A	0.279621
YCL049C	0.81			YBL057C	-0.51222
YLR149C	0.81			YBL055C	-0.58103
YGL247W	0.81			YBL052C	-0.764902
YHR078W	0.81			YBL051C	-0.363668
YBL056W	0.81			YBL047C	-0.228569
YMR225C	0.8			YBL045C	0.372613
YGL156W	0.8			YBL042C	-0.242747
YLR258W	0.79			YBL040C	-0.141824
YHR033W	0.79			YBL039C	-0.561529
YKL063C	0.79			YBL036C	-0.525426
YLL043W	0.79			YBL035C	-0.131172
YKL002W	0.78			YBL034C	-0.544618
YCR066W	0.78			YBL033C	0.169003
YPL005W	0.78			YBL030C	0.0736509
YNL095C	0.78			YBL029C-A	0.959015
YOR298C-A	0.78			YBL028C	-0.081303
YDR031W	0.78			YBL023C	0.0412875
YCL057C-A	0.78			YBL022C	0.0606529
YBR239C	0.77			YBL021C	0.532553
YBR173C	0.77			YBL018C	-0.399652
YLR177W	0.77			YBL017C	-0.457431
YBL028C	0.77			YBL014C	-0.480909
YMR073C	0.76			YBL010C	0.44479
YBR091C	0.76			YBL007C	0.270564
YDR391C	0.76			YBL006C	-0.055215
YER094C	0.76			YBL003C	-0.246309
YPL223C	0.75			YBL001C	0.451846
YMR159C	0.75			YBR001C	0.604014
YPL239W	0.75			YBR002C	-0.36506
YLL026W	0.74			YBR004C	-1.27106
YAR015W	0.74			YBR007C	-0.0862382
YKL167C	0.73			YBR008C	2.57403
YMR196W	0.73			YBR009C	0.497974
YDR056C	0.73			YBR011C	-1.04675
YOL032W	0.73			YBR014C	0.017769
YMR062C	0.73			YBR015C	-1.47196
YOL086W-A	0.73			YBR017C	-0.38171
YLR038C	0.73			YBR018C	1.99593
YNL156C	0.72			YBR019C	0.0181368
YCL051W	0.72			YBR023C	0.156296
YER062C	0.71			YBR025C	-0.883719
YOR130C	0.7			YBR026C	0.484712
YKL151C	0.7			YBR028C	-0.216878
YCR087C-A	0.7			YBR029C	-0.72066
YMR114C	0.7			YBR034C	-0.673036
YCR028C	0.7			YBR035C	0.333419
YKL006C-A	0.7			YBR036C	-0.24803
YGL243W	0.69			YBR037C	0.90862
YJL115W	0.69			YBR042C	-1.47619
YPR030W	0.69			YBR043C	2.73195
YPL034W	0.69			YBR044C	-0.286671
YFR041C	0.69			YBR045C	-0.416877
YNL079C	0.69			YBR046C	0.876575
YGL212W	0.68			YBR049C	-0.377997
YCR060W	0.68			YBR050C	0.550759
YIL077C	0.68			YBR052C	0.715562
YOR317W	0.68			YBR053C	1.09877
YBR185C	0.67			YBR055C	0.00451948
YLR019W	0.67			YBR057C	0.181059
YLR286C	0.67			YBR058C	0.149531
YNL194C	0.66			YBR058C-A	-0.205229
YGL095C	0.66			YBR059C	0.0597763
YMR147W	0.65			YBR060C	-0.545274
YJR034W	0.65			YBR061C	-0.107366
YDR173C	0.65			YBR062C	0.406776
YJL155C	0.65			YBR063C	-0.165241
YBR200W	0.65			YBR065C	1.32313
YBR065C	0.64			YBR066C	0.0256147
YNL098C	0.64			YBR067C	0.48798
YBR077C	0.64			YBR068C	0.967987
YDL110C	0.64			YBR069C	0.188716
YMR169C	0.64			YBR070C	-0.403821
YPL240C	0.64			YBR076C-A	3.50552
YNR001C	0.63			YBR077C	0.972207
YOR173W	0.63			YBR079C	-0.907626
YNL274C	0.63			YBR080C	0.0281993
YPL072W	0.63			YBR081C	0.0486569
YDR380W	0.63			YBR082C	-0.469336
YKL098W	0.63			YBR084C-A	-0.987551
YMR286W	0.63			YBR085C-A	2.50105
YML004C	0.62			YBR086C	-0.624201
YLR128W	0.62			YBR088C	-0.0938698
YLR299W	0.62			YBR089C-A	-0.20015
YKL137W	0.62			YBR091C	0.420865
YJL020C	0.62			YBR092C	-0.230663
YOR059C	0.62			YBR093C	-1.25277
YOR077W	0.62			YBR095C	0.39658
YPL134C	0.62			YBR099C	-5.53907
YPL149W	0.62			YBR101C	0.156879
YHR132W-A	0.61			YBR102C	0.0240212
YOR221C	0.61			YBR105C	1.33909
YNL229C	0.61			YBR107C	0.336192
YKL170W	0.61			YBR109C	0.303252
YDR297W	0.61			YBR111C	0.753443
YGL087C	0.61			YBR112C	-0.515222
YDL010W	0.61			YBR115C	0.317773
YJL049W	0.61			YBR120C	0.478164
YDR481C	0.6			YBR121C	-0.666114
YCR086W	0.6			YBR122C	0.651876
YBR214W	0.6			YBR123C	0.374519
YCR048W	0.6			YBR125C	-0.892978
YKL142W	0.6			YBR126C	1.26603
YKR006C	0.6			YBR127C	-0.709849
YMR253C	0.6			YBR128C	0.670497
YOR194C	0.6			YBR129C	0.828992
YKR009C	0.6			YBR130C	0.126774
YMR134W	0.59			YBR132C	1.67568
YBL038W	0.59			YBR133C	-0.853207
YBR251W	0.59			YBR138C	1.11129
YLR211C	0.59			YBR140C	0.484435
YOR162C	0.59			YBR141C	-0.0645159
YCR071C	0.59			YBR143C	-0.44702
YBR046C	0.59			YBR150C	0.252863
YDL204W	0.59			YBR154C	-0.644769
YOR283W	0.58			YBR156C	-0.152749
YPL186C	0.58			YBR157C	-1.25956
YBR058C	0.58			YBR162C	-0.87047
YLR093C	0.58			YBR164C	-0.0488656
YER103W	0.58			YBR166C	0.339476
YKL054C	0.58			YBR167C	0.392916
YDR204W	0.58			YBR169C	2.03664
YOL038W	0.57			YBR170C	0.0657359
YOR043W	0.57			YBR172C	-0.522086
YOL113W	0.57			YBR173C	0.298706
YNL148C	0.57			YBR177C	-0.106761
YBR145W	0.56			YBR179C	0.329142
YHL009C	0.56			YBR181C	-0.694072
YCR059C	0.56			YBR182C	0.362532
YGR084C	0.56			YBR185C	0.440884
YER050C	0.56			YBR188C	0.997541
YGL106W	0.56			YBR193C	0.293106
YMR250W	0.55			YBR195C	-0.521529
YML025C	0.55			YBR196C	-0.353134
YHR038W	0.55			YBR197C	0.647312
YNL250W	0.55			YBR198C	-0.427243
YCL028W	0.55			YBR201C-A	0.90596
YGL198W	0.55			YBR204C	0.927047
YJL066C	0.54			YBR208C	-0.118274
YBR056W	0.54			YBR211C	0.320979
YDR513W	0.54			YBR216C	1.26388
YLR393W	0.54			YBR218C	-0.514722
YPL110C	0.54			YBR221C	-0.223073
YHR144C	0.54			YBR222C	0.496201
YCL045C	0.53			YBR223C	0.674674
YGR248W	0.53			YBR229C	-0.638783
YDR515W	0.53			YBR230C	0.733859
YOR281C	0.53			YBR231C	0.0543175
YDR397C	0.53			YBR234C	0.507987
YNL113W	0.53			YBR236C	0.422343
YPL067C	0.53			YBR238C	-0.477278
YBR006W	0.53			YBR239C	0.211643
YGR113W	0.52			YBR240C	0.5554
YKL090W	0.52			YBR241C	0.488084
YJR107C-A	0.52			YBR243C	-1.2393
YGR038W	0.52			YBR245C	-0.162988
YGR019W	0.51			YBR247C	-0.569089
YCR046C	0.51			YBR248C	-0.109234
YBR154C	0.51			YBR249C	-0.428198
YCL057W	0.51			YBR254C	0.211765
YIR024C	0.51			YBR255C-A	0.822607
YBR230W-A	0.51			YBR256C	0.778606
YOL060C	0.51			YBR258C	0.783614
YDR529C	0.51			YBR260C	-0.323546
YMR052W	0.51			YBR261C	-0.0754953
YJL141C	0.51			YBR262C	1.34118
YBR167C	0.51			YBR264C	0.00538508
YMR029C	0.51			YBR269C	1.21224
YJL053W	0.5			YBR270C	0.564771
YMR090W	0.5			YBR272C	0.180675
YLR226W	0.5			YBR273C	0.0434686
YIL036W	0.5			YBR275C	-0.0262544
YGL090W	0.5			YBR276C	-0.684731
YBL064C	0.5			YBR280C	0.849972
YPR173C	0.49			YBR281C	-0.2074
YGR100W	0.49			YBR283C	-1.19002
YIL124W	0.49			YBR288C	-0.0583748
YFR046C	0.49			YBR291C	-0.0649271
YPL091W	0.49			YBR292C	-6.76886
YFR048W	0.49			YBR296C	-1.13135
YML120C	0.49			YBR298C	0.643117
YKL035W	0.49			YBL102W	0.366668
YOR245C	0.48			YBL099W	0.298569
YOR166C	0.48			YBL098W	-1.44481
YDR237W	0.48			YBL097W	-0.0894255
YGL068W	0.48			YBL095W	0.0563872
YAL014C	0.48			YBL092W	-1.32018
YGL110C	0.48			YBL090W	0.749979
YOR157C	0.47			YBL089W	-0.268544
YHR191C	0.47			YBL085W	-0.511025
YOR052C	0.47			YBL081W	-1.38971
YMR188C	0.47			YBL079W	-0.582472
YDR227W	0.47			YBL071W-A	0.227283
YKR087C	0.47			YBL068W	-0.119805
YLR256W-A	0.47			YBL063W	-1.0055
YCR021C	0.47			YBL060W	-0.182862
YOR368W	0.47			YBL059W	0.955237
YMR172W	0.47			YBL058W	0.267189
YHR001W-A	0.47			YBL056W	-0.0445591
YGL250W	0.46			YBL054W	-0.465714
YKR022C	0.46			YBL050W	0.313373
YGL157W	0.46			YBL048W	-1.43401
YIL087C	0.46			YBL046W	-0.194391
YDR405W	0.46			YBL043W	3.41566
YLR412W	0.46			YBL041W	0.298462
YLR069C	0.46			YBL039W-B	1.19403
YMR092C	0.46			YBL038W	0.867729
YOR297C	0.46			YBL037W	0.115925
YAR018C	0.45			YBL032W	-0.506893
YGL080W	0.45			YBL031W	-0.273714
YBR022W	0.45			YBL029W	-0.362333
YHR037W	0.45			YBL027W	-0.935648
YKL077W	0.45			YBL026W	-0.635012
YGR068C	0.45			YBL025W	0.620565
YKL069W	0.45			YBL024W	-0.499888
YPL188W	0.45			YBL020W	-1.73427
YNL059C	0.45			YBL019W	0.0777173
YPL225W	0.45			YBL016W	0.263871
YKR027W	0.45			YBL015W	0.262815
YCL043C	0.45			YBL011W	-0.710053
YIR038C	0.45			YBL009W	-0.503525
YLR424W	0.45			YBL008W	-0.476814
YLR133W	0.44			YBL005W	-0.412952
YBR035C	0.44			YBL004W	-1.2449
YPR011C	0.44			YBL002W	-0.575943
YGR278W	0.44			YBR003W	-0.219002
YJL164C	0.44			YBR005W	0.523554
YER034W	0.44			YBR006W	1.24671
YDR304C	0.44			YBR010W	0.518866
YCL044C	0.44			YBR016W	-0.0335201
YML111W	0.44			YBR020W	-0.141858
YBR235W	0.44			YBR021W	-0.0410872
YPL087W	0.44			YBR022W	0.670969
YER140W	0.44			YBR024W	0.586131
YJR096W	0.43			YBR030W	-0.50804
YKL007W	0.43			YBR031W	-0.758393
YDR307W	0.43			YBR033W	3.5595
YHR016C	0.43			YBR038W	-0.13717
YKL015W	0.43			YBR039W	0.169753
YER017C	0.43			YBR041W	-0.60853
YML105C	0.43			YBR047W	0.503583
YNL309W	0.43			YBR048W	-1.05761
YKL211C	0.42			YBR054W	1.42416
YML016C	0.42			YBR056W	1.15611
YGL159W	0.42			YBR056W-A	1.88281
YLR454W	0.42			YBR071W	0.883606
YGR147C	0.42			YBR072W	3.77899
YMR218C	0.42			YBR073W	0.226041
YMR001C	0.42			YBR074W	-1.1565
YKL138C	0.42			YBR076W	0.916473
YNL076W	0.42			YBR078W	-0.411078
YBR129C	0.42			YBR083W	0.0131487
YKR074W	0.42			YBR084W	-1.04411
YMR154C	0.42			YBR085W	-2.05395
YDL175C	0.42			YBR087W	-0.389003
YHL007C	0.41			YBR094W	-0.692177
YNL131W	0.41			YBR096W	-0.440872
YBR126C	0.41			YBR097W	-0.194575
YBR146W	0.41			YBR098W	-0.00955596
YJR067C	0.41			YBR103W	-0.103835
YER093C	0.41			YBR104W	-0.949468
YGR247W	0.41			YBR106W	-1.62986
YPL154C	0.41			YBR108W	0.398306
YNR037C	0.41			YBR110W	-0.683463
YLR407W	0.41			YBR111W-A	0.251866
YLR312W-A	0.41			YBR114W	0.150676
YKR014C	0.41			YBR118W	-0.564194
YPR020W	0.41			YBR119W	0.207576
YMR268C	0.4			YBR131W	-0.0195497
YPR040W	0.4			YBR135W	-0.329449
YIR036C	0.4			YBR136W	-0.378375
YPL100W	0.4			YBR137W	-0.118681
YNL315C	0.39			YBR139W	0.837685
YMR024W	0.39			YBR141W-A	0.860206
YKL103C	0.39			YBR142W	-0.745455
YNL231C	0.39			YBR145W	0.501351
YDR408C	0.39			YBR146W	0.321761
YDL190C	0.39			YBR147W	1.83977
YBR058C-A	0.39			YBR148W	-0.490298
YHR077C	0.39			YBR149W	1.33713
YDR035W	0.39			YBR151W	-0.209008
YNR049C	0.39			YBR152W	0.487069
YJR083C	0.39			YBR153W	0.786186
YEL050C	0.39			YBR155W	-0.599624
YER161C	0.39			YBR158W	-0.710374
YDR231C	0.39			YBR159W	-0.696499
YGR232W	0.39			YBR160W	0.420981
YKL104C	0.39			YBR161W	0.126409
YPL206C	0.39			YBR162W-A	-0.411654
YER063W	0.39			YBR163W	-1.08784
YDL131W	0.38			YBR165W	0.185814
YJR065C	0.38			YBR168W	0.221867
YLR268W	0.38			YBR171W	-0.45128
YFR038W	0.38			YBR175W	0.489207
YJL074C	0.38			YBR176W	-0.58559
YLR387C	0.38			YBR183W	2.12275
YBR208C	0.38			YBR184W	0.954917
YER010C	0.38			YBR186W	0.881828
YLR270W	0.38			YBR187W	-1.06013
YDR414C	0.38			YBR189W	-1.03585
YIL135C	0.37			YBR192W	-0.25804
YPL022W	0.37			YBR194W	0.525571
YMR124W	0.37			YBR199W	0.126395
YJL186W	0.37			YBR200W	0.244613
YGL061C	0.37			YBR201W	-0.158934
YDR496C	0.37			YBR202W	-0.398993
YOR020W-A	0.37			YBR203W	0.533606
YER172C	0.37			YBR205W	-0.587998
YEL003W	0.37			YBR207W	-0.0179815
YCL059C	0.37			YBR210W	-0.313947
YCR035C	0.37			YBR212W	0.303978
YLR324W	0.37			YBR213W	-0.986514
YMR041C	0.37			YBR214W	1.56119
YNL103W	0.37			YBR215W	0.340943
YEL013W	0.36			YBR217W	0.761579
YDR071C	0.36			YBR225W	0.563261
YIL033C	0.36			YBR228W	0.465553
YDL230W	0.36			YBR230W-A	0.948715
YDR028C	0.36			YBR233W	-0.303382
YDR365C	0.36			YBR233W-A	0.118924
YBR278W	0.36			YBR235W	-0.471091
YMR302C	0.36			YBR237W	-0.16531
YAL017W	0.36			YBR242W	-0.607548
YDR453C	0.36			YBR244W	-0.476019
YKL099C	0.35			YBR246W	0.337556
YFL048C	0.35			YBR250W	-1.4647
YLR078C	0.35			YBR251W	0.53043
YER045C	0.35			YBR252W	-0.294543
YGR047C	0.35			YBR253W	0.353641
YFL021W	0.35			YBR255W	0.565393
YFR050C	0.35			YBR257W	0.0752772
YGR244C	0.35			YBR259W	0.128059
YDR190C	0.35			YBR263W	-2.45333
YLR199C	0.35			YBR265W	-0.0282085
YBR202W	0.35			YBR267W	-0.389624
YGL166W	0.35			YBR268W	0.1705
YIL095W	0.34			YBR271W	-0.739081
YHR114W	0.34			YBR274W	0.465095
YKL121W	0.34			YBR278W	0.111241
YKR010C	0.34			YBR279W	-0.0104816
YAL048C	0.34			YBR282W	1.12113
YJL127C	0.34			YBR284W	1.34107
YAL042W	0.34			YBR285W	1.01615
YHR198C	0.34			YBR286W	-0.801455
YIL108W	0.34			YBR287W	-0.353131
YNL074C	0.34			YBR289W	-0.0151598
YPR147C	0.34			YBR290W	0.45398
YPR072W	0.34			YBR293W	0.781666
YER090W	0.34			YBR294W	-0.897564
YDL044C	0.34			YBR295W	0.891898
YFR011C	0.33			YBR297W	1.25391
YKL042W	0.33			YBR299W	1.79171
YOR132W	0.33			YCL064C	-2.11803
YPL078C	0.33			YCL061C	1.43717
YBL057C	0.33			YCL059C	0.594254
YMR086W	0.33			YCL057C-A	1.50584
YDR121W	0.33			YCL056C	2.30432
YFR019W	0.33			YCL052C	1.11867
YLR166C	0.33			YCL050C	0.204792
YNR007C	0.33			YCL049C	2.24242
YHR100C	0.33			YCL047C	0.780968
YJL179W	0.33			YCL045C	0.230308
YPR055W	0.32			YCL044C	-0.0474202
YJL125C	0.32			YCL043C	0.0658129
YBR170C	0.32			YCL041C	0.629231
YBL023C	0.32			YCL038C	1.45701
YJL167W	0.32			YCL037C	-0.495282
YDR494W	0.32			YCL035C	2.09797
YLR248W	0.32			YCL033C	1.68979
YGR095C	0.32			YCL031C	0.642938
YMR305C	0.32			YCL030C	1.07102
YPR161C	0.32			YCL029C	0.581266
YIL035C	0.32			YCL026C-B	0.0486626
YBR225W	0.32			YCL026C-A	0.78864
YDR057W	0.32			YCL025C	1.30437
YNL161W	0.32			YCL017C	0.65203
YNL243W	0.32			YCL016C	0.781121
YMR089C	0.31			YCL012C	1.75105
YML117W	0.31			YCL011C	0.385782
YLR090W	0.31			YCL010C	1.42605
YNL265C	0.31			YCL009C	0.0676485
YDL088C	0.31			YCL008C	0.288898
YPR129W	0.31			YCL002C	-0.0626557
YLR006C	0.31			YCR002C	1.13612
YPL096W	0.31			YCR004C	1.18855
YDL029W	0.31			YCR005C	1.66808
YJL112W	0.31			YCR007C	2.74613
YLR406C	0.31			YCR009C	0.767526
YMR261C	0.31			YCR010C	3.37658
YJL063C	0.31			YCR011C	0.946937
YLR203C	0.3			YCR014C	4.01198
YDL156W	0.3			YCR015C	2.04833
YOR362C	0.3			YCR017C	0.612439
YLR058C	0.3			YCR020C	0.927559
YLR319C	0.3			YCR020C-A	1.57858
YLR398C	0.3			YCR021C	4.22009
YLR401C	0.3			YCR022C	-2.31428
YLR146C	0.3			YCR023C	1.06171
YHR049W	0.3			YCR024C	1.47349
YBR120C	0.3			YCR024C-B	-1.60006
YBL029C-A	0.29			YCR024C-A	-0.301787
YBR003W	0.29			YCR025C	-2.31287
YFL028C	0.29			YCR026C	1.50572
YBR248C	0.29			YCR027C	1.39347
YOR074C	0.29			YCR028C	0.703706
YBR291C	0.29			YCR028C-A	0.682091
YNR035C	0.29			YCR030C	1.08936
YGR231C	0.29			YCR031C	0.125464
YGL130W	0.29			YCR035C	0.704079
YIR006C	0.29			YCR037C	2.23166
YGR021W	0.29			YCR038C	0.225735
YDR469W	0.29			YCR042C	1.22731
YJL068C	0.29			YCR043C	0.0275579
YMR067C	0.28			YCR044C	0.00113923
YOR287C	0.28			YCR046C	1.27398
YBL059C-A	0.28			YCR047C	0.240325
YDR390C	0.28			YCR054C	1.23683
YOR069W	0.28			YCR057C	0.273495
YCR095C	0.28			YCR059C	0.548793
YNL252C	0.28			YCR064C	2.51226
YDR394W	0.28			YCR067C	0.780897
YJL208C	0.28			YCR071C	1.48129
YKL172W	0.28			YCR072C	0.390711
YNL240C	0.28			YCR073C	1.22452
YNL099C	0.28			YCR075C	1.00096
YMR281W	0.28			YCR076C	1.46285
YPR070W	0.28			YCR077C	1.10001
YFR051C	0.28			YCR084C	0.406692
YEL044W	0.28			YCR087C-A	0.345063
YHR146W	0.28			YCR090C	0.545243
YCL054W	0.28			YCR092C	0.616202
YNL045W	0.28			YCR095C	0.833018
YDR145W	0.27			YCR098C	1.32769
YJL070C	0.27			YCR102C	0.216755
YGR279C	0.27			YCL063W	0.135807
YHR028C	0.27			YCL058W-A	0.207389
YBR288C	0.27			YCL057W	0.618027
YGL075C	0.27			YCL055W	1.13924
YDL173W	0.27			YCL054W	0.305042
YMR152W	0.27			YCL051W	1.17665
YJL011C	0.27			YCL048W	1.61629
YER171W	0.27			YCL040W	3.23031
YFR044C	0.26			YCL039W	1.2113
YDR183W	0.26			YCL036W	0.230351
YDL132W	0.26			YCL034W	1.03079
YDR049W	0.26			YCL032W	1.20192
YGR003W	0.26			YCL028W	0.629769
YDR061W	0.26			YCL027W	-0.485946
YJR080C	0.26			YCL024W	1.36961
YBR229C	0.26			YCL021W-A	0.426312
YAL035W	0.26			YCL018W	2.84727
YDR017C	0.26			YCL014W	0.532647
YGL101W	0.26			YCL005W-A	0.360371
YKL140W	0.26			YCL005W	0.289944
YLR364W	0.26			YCL004W	1.92122
YHR063C	0.26			YCL001W	0.363684
YPR108W	0.26			YCR003W	1.6591
YKL078W	0.26			YCR008W	-0.0446584
YOL111C	0.26			YCR012W	0.606008
YDL122W	0.25			YCR016W	0.566837
YOR109W	0.25			YCR019W	1.6095
YLR309C	0.25			YCR020W-B	1.96817
YDR493W	0.25			YCR032W	1.12419
YNL168C	0.25			YCR033W	-0.127438
YOR061W	0.25			YCR034W	-0.172164
YDR377W	0.25			YCR036W	1.73965
YBR039W	0.25			YCR045W-A	-2.80499
YMR192W	0.25			YCR048W	-0.434273
YHR113W	0.25			YCR051W	0.471369
YBR260C	0.25			YCR052W	0.517718
YML093W	0.24			YCR053W	0.622524
YLR274W	0.24			YCR061W	0.520978
YDR460W	0.24			YCR063W	1.90447
YML009C	0.24			YCR065W	0.745073
YGR103W	0.24			YCR066W	0.850747
YPR169W	0.24			YCR068W	1.66081
YNL239W	0.24			YCR069W	0.362915
YKR099W	0.24			YCR073W-A	1.36502
YOL077C	0.23			YCR075W-A	1.07511
YJL081C	0.23			YCR079W	1.29209
YOR241W	0.23			YCR081W	0.617714
YER105C	0.23			YCR082W	1.15666
YLR163C	0.23			YCR083W	1.08631
YDR002W	0.23			YCR086W	1.00693
YDR108W	0.23			YCR088W	1.09111
YGR207C	0.23			YCR089W	2.37414
YDR468C	0.22			YCR091W	2.71247
YNL121C	0.22			YCR093W	-0.132657
YOR046C	0.22			YCR094W	0.781398
YKL040C	0.22			YCR095W-A	-3.96245
YBR130C	0.22			YCR097W	-11.1928
YER078C	0.22			YCR105W	1.49989
YLR396C	0.22			YCR106W	1.42887
YJR088C	0.22			YCR107W	4.21105
YDL007W	0.22			YDL243C	3.41758
YPL228W	0.22			YDL239C	-2.12862
YKL018W	0.22			YDL238C	1.62956
YKL074C	0.22			YDL235C	-0.711744
YLR418C	0.21			YDL234C	1.12242
YOR261C	0.21			YDL231C	-0.13127
YER013W	0.21			YDL227C	-1.5108
YDR211W	0.2			YDL226C	0.043382
YML070W	0.19			YDL224C	0.14778
YGL084C	0.19			YDL222C	4.81395
YIR004W	0.19			YDL220C	-0.1426
YDL019C	0.18			YDL217C	0.676532
YNR015W	0.18			YDL216C	1.03453
YKL016C	0.18			YDL215C	2.09179
YHR195W	0.18			YDL214C	2.12782
YDL135C	0.18			YDL213C	-0.296633
YEL047C	0.17			YDL211C	-0.435874
YNL186W	0.17			YDL209C	0.427337
YOL010W	0.17			YDL205C	-0.985637
YFL047W	0.17			YDL203C	-0.0822026
YAL059W	0.17			YDL200C	0.539964
YML069W	0.17			YDL199C	1.61104
YDR083W	0.16			YDL198C	-0.315203
YJL124C	0.16			YDL197C	-0.763086
YJL050W	0.16			YDL190C	0.112744
YMR099C	0.16			YDL188C	-0.0359509
YOL088C	0.16			YDL187C	-5.69341
YNR051C	0.16			YDL184C	-1.69494
YDR091C	0.16			YDL183C	0.524663
YOR340C	0.15			YDL177C	-0.189421
YBR034C	0.15			YDL175C	0.484351
YOL062C	0.15			YDL174C	0.413287
YLR234W	0.15			YDL171C	-1.66265
YBR081C	0.14			YDL169C	2.60828
YDR335W	0.13			YDL167C	-0.715376
YLR259C	0.13			YDL166C	0.0636692
YFR014C	0.12			YDL164C	-0.123019
YGL014W	0.12			YDL160C-A	-0.246425
YLR409C	0.1			YDL160C	0.802237
YLR292C	0.1			YDL157C	-0.197664
YLR429W	0.07			YDL153C	-0.477291
YGR123C	-0.07			YDL148C	-0.0874961
YIL154C	-0.13			YDL145C	-0.522516
YMR229C	-0.14			YDL144C	-0.116198
YOR106W	-0.14			YDL142C	0.145127
YNL232W	-0.15			YDL140C	-0.964284
YOR310C	-0.16			YDL139C	0.75321
YJR007W	-0.17			YDL135C	-0.0687585
YGR094W	-0.18			YDL134C	0.0843507
YMR015C	-0.18			YDL133C-A	-1.54871
YDR093W	-0.2			YDL126C	0.0694189
YJR145C	-0.21			YDL125C	-0.464835
YMR308C	-0.22			YDL121C	-0.401722
YPR181C	-0.23			YDL119C	0.716395
YJR139C	-0.24			YDL115C	0.550302
YBR038W	-0.24			YDL113C	0.414727
YLR378C	-0.26			YDL111C	-0.0483891
YGR276C	-0.26			YDL110C	1.59734
YDL075W	-0.28			YDL109C	0.525703
YLR388W	-0.28			YDL106C	0.619708
YER091C	-0.29			YDL104C	0.130834
YBL008W	-0.29			YDL103C	0.066779
YJL207C	-0.29			YDL101C	0.147725
YMR186W	-0.31			YDL100C	-0.307272
YKR020W	-0.31			YDL098C	-0.408392
YLR344W	-0.31			YDL097C	0.168414
YBR195C	-0.31			YDL094C	-1.3223
YDR359C	-0.31			YDL091C	0.147624
YPL106C	-0.32			YDL090C	-0.242936
YBR172C	-0.32			YDL088C	-0.265381
YER036C	-0.32			YDL087C	0.712794
YDL140C	-0.32			YDL086C-A	1.11365
YBL092W	-0.32			YDL085C-A	-0.392602
YPL016W	-0.32			YDL083C	-0.867397
YBR106W	-0.32			YDL081C	-1.15765
YKL191W	-0.33			YDL080C	0.181961
YOR332W	-0.33			YDL079C	2.74671
YDR454C	-0.33			YDL078C	-0.0320158
YHR163W	-0.33			YDL077C	0.151395
YGR085C	-0.34			YDL076C	-0.147577
YJL173C	-0.34			YDL074C	-0.389012
YDR447C	-0.34			YDL072C	0.568348
YHR184W	-0.34			YDL069C	-0.48973
YML081W	-0.34			YDL067C	0.530492
YER074W	-0.35			YDL065C	0.645217
YJR082C	-0.35			YDL063C	-1.00451
YBR189W	-0.36			YDL061C	-1.19151
YOR175C	-0.36			YDL059C	0.188099
YGL123W	-0.38			YDL055C	-0.373867
YDR033W	-0.38			YDL054C	-0.294267
YDR409W	-0.38			YDL053C	-0.379994
YGL099W	-0.39			YDL052C	-1.07183
YML063W	-0.39			YDL049C	0.866983
YBR132C	-0.39			YDL048C	0.50937
YCR031C	-0.4			YDL045C	-0.0112894
YOL040C	-0.4			YDL044C	0.32713
YHR021C	-0.4			YDL043C	0.540147
YML012W	-0.41			YDL042C	-0.914158
YDL003W	-0.41			YDL040C	-0.583211
YDR207C	-0.42			YDL039C	2.38604
YLR029C	-0.43			YDL036C	-0.201569
YNL178W	-0.43			YDL035C	-0.62167
YNL069C	-0.43			YDL033C	-0.423186
YJL197W	-0.43			YDL028C	-0.00819447
YPR003C	-0.43			YDL027C	0.504748
YOL127W	-0.44			YDL025C	0.980654
YIL064W	-0.44			YDL024C	1.86317
YOR369C	-0.44			YDL020C	0.849635
YHR031C	-0.44			YDL019C	-0.0690343
YNL080C	-0.44			YDL018C	-0.245545
YDL061C	-0.44			YDL015C	-0.475045
YHR174W	-0.46			YDL012C	-0.314769
YGR055W	-0.46			YDL009C	0.109395
YOR007C	-0.46			YDL005C	-0.15579
YBR015C	-0.47			YDL002C	-0.145074
YDL229W	-0.47			YDR001C	1.60323
YPL249C-A	-0.47			YDR005C	0.0396227
YDR428C	-0.47			YDR006C	-0.538166
YBR031W	-0.48			YDR008C	1.64584
YFL046W	-0.49			YDR016C	0.583663
YBR181C	-0.49			YDR017C	-0.110166
YAR019C	-0.49			YDR018C	3.2016
YMR241W	-0.5			YDR019C	2.07018
YBR161W	-0.5			YDR020C	-0.0244451
YGL147C	-0.5			YDR022C	1.11499
YBR011C	-0.51			YDR026C	-0.437805
YDR483W	-0.51			YDR027C	-0.559085
YHR149C	-0.52			YDR028C	0.466993
YML074C	-0.53			YDR030C	0.652238
YJR070C	-0.54			YDR032C	0.507928
YNL077W	-0.54			YDR034C	-0.469893
YOR133W	-0.55			YDR036C	-0.551287
YML085C	-0.55			YDR038C	0.591982
YDL159W	-0.55			YDR042C	-0.539229
YHR179W	-0.55			YDR045C	-0.170342
YLR325C	-0.56			YDR046C	0.491645
YML056C	-0.56			YDR048C	-2.06858
YOL072W	-0.56			YDR050C	-0.475318
YHR047C	-0.56			YDR051C	-0.21525
YOR312C	-0.57			YDR052C	-0.144165
YDR064W	-0.57			YDR054C	0.0822713
YML126C	-0.57			YDR056C	-0.445225
YJL132W	-0.58			YDR058C	1.71724
YKR081C	-0.6			YDR059C	2.04488
YLR448W	-0.6			YDR066C	0.254168
YGL103W	-0.6			YDR067C	0.450081
YGL076C	-0.61			YDR069C	0.739572
YGL031C	-0.61			YDR070C	2.12356
YOL036W	-0.62			YDR071C	-0.0905934
YGR286C	-0.63			YDR072C	-0.41552
YLR061W	-0.65			YDR078C	0.698372
YHR193C	-0.66			YDR079C-A	-0.216327
YNL087W	-0.67			YDR081C	-0.487277
YBR107C	-0.67			YDR084C	-0.255772
YHL001W	-0.68			YDR085C	1.69857
YDL136W	-0.68			YDR086C	-0.635797
YHR010W	-0.7			YDR087C	-0.271021
YJL026W	-0.7			YDR088C	0.566456
YGR060W	-0.7			YDR090C	-0.468563
YNL067W	-0.71			YDR091C	-0.596481
YNL299W	-0.72			YDR097C	-0.0256247
YBR085W	-0.73			YDR098C	-0.133934
YML051W	-0.75			YDR101C	-0.655175
YOR355W	-0.76			YDR104C	0.354402
YDL171C	-0.76			YDR105C	-0.396142
YKL043W	-0.79			YDR107C	-0.310447
YER165W	-0.8			YDR109C	0.302747
YFL045C	-0.85			YDR111C	0.414798
YNL054W-B	-0.86			YDR113C	0.163992
YHR216W	-0.86			YDR116C	0.516674
YJR137C	-0.87			YDR117C	-0.35378
YDR039C	-0.87			YDR120C	-0.949477
YOR344C	-0.89			YDR123C	0.185526
YCL019W	-0.97			YDR125C	1.2439
YDR382W	-1.01			YDR129C	0.248776
YLR340W	-1.03			YDR130C	0.866398
YOL039W	-1.05			YDR131C	0.210289
YHR136C	-1.06			YDR132C	-0.494285
YJR085C	-1.17			YDR133C	-5.13179
YOR342C	-1.18			YDR135C	-0.57529
YHR214C-B	-1.26			YDR139C	-0.505658
YHR094C	-1.37			YDR141C	-0.0939664
YJL191W	-1.39			YDR142C	-0.208945
YGR260W	-1.41			YDR143C	-0.470501
YLR130C	-1.46			YDR144C	-1.62789
YML123C	-1.48			YDR146C	0.430882
YKL184W	-1.58			YDR148C	0.623667
YML079W	0.49			YDR151C	-0.130765
YDL116W	-0.18			YDR153C	-0.0697873
YDR539W	0.25			YDR162C	0.816924
YDL070W	-0.32			YDR164C	-0.537039
YPL070W	0.3			YDR166C	-0.015007
YML100W	1.08			YDR169C	0.532687
YJL014W	-0.1			YDR170C	-0.608677
YDR275W	0.88			YDR173C	0.526568
YIL149C	0.2			YDR175C	0.521852
YNL221C	-0.2			YDR179C	0.617155
YER141W	0.25			YDR181C	0.409053
YER071C	0.41			YDR185C	0.829533
YBR088C	0.18			YDR186C	-0.0309528
YJL162C	0.66			YDR190C	0.103181
YOL112W	0.89			YDR192C	-0.0535947
YNL215W	0.45			YDR194C	-0.357497
YAL003W	-0.23			YDR196C	0.745961
YPR047W	0.47			YDR198C	-0.51581
YGR097W	0.25			YDR200C	-0.196679
YJL154C	0.14			YDR202C	0.329494
YNL107W	0.51			YDR207C	-0.604887
YOR273C	0.65			YDR217C	-0.620314
YDL017W	0.22			YDR218C	0.882644
YKL143W	0.3			YDR219C	0.303431
YJR049C	0.26			YDR224C	0.00998127
YHR139C	1.03			YDR228C	-0.181982
YPL213W	0.41			YDR231C	1.12625
YPL220W	-0.57			YDR233C	-1.06305
YMR110C	0.39			YDR236C	0.241013
YDR436W	0.46			YDR238C	-0.248494
YGR130C	0.29			YDR239C	-0.055416
YNR026C	0.21			YDR240C	-0.415975
YDR374W-A	0.71			YDR243C	0.212354
YGR032W	1.52			YDR248C	0.18972
YBR191W	-0.69			YDR249C	-0.438916
YDR419W	-0.35			YDR253C	-0.272481
YLR210W	0.81			YDR255C	0.611517
YMR266W	-1.06			YDR256C	1.59225
YDL142C	0.4			YDR257C	0.160445
YIL085C	1.41			YDR258C	2.04385
YLR075W	-0.4			YDR259C	0.0931884
YGL184C	0.57			YDR260C	0.791759
YOR127W	0.49			YDR261C	-0.650427
YIL084C	0.22			YDR263C	1.51325
YDR162C	0.51			YDR264C	-0.303345
YML104C	1.63			YDR266C	-0.0527215
YLR352W	0.3			YDR267C	-0.0312988
YDR155C	-0.66			YDR276C	-0.736001
YKR085C	0.48			YDR277C	1.73222
YIR003W	0.76			YDR281C	-4.29738
YAL016W	0.27			YDR282C	0.34842
YER113C	-0.44			YDR283C	0.316199
YJL116C	1.07			YDR284C	0.18565
YGR136W	0.22			YDR286C	0.173219
YNL241C	-0.46			YDR289C	0.239142
YCL030C	1.6			YDR292C	-0.590748
YGL058W	1.46			YDR293C	0.826856
YMR059W	-0.5			YDR294C	-0.253262
YML091C	0.24			YDR295C	-0.293895
YLR190W	0.2			YDR298C	0.396627
YDR294C	0.18			YDR300C	-1.04358
YLR249W	-0.29			YDR303C	-0.86151
YHR039C	0.26			YDR304C	-0.638931
YFR029W	0.34			YDR305C	0.0892804
YKR043C	-0.19			YDR306C	0.958823
YGR145W	0.39			YDR308C	0.546331
YNR036C	0.71			YDR309C	0.876627
YOL052C	0.2			YDR310C	-0.752711
YHR024C	0.21			YDR313C	0.684575
YAL027W	0.3			YDR314C	0.877887
YMR021C	0.27			YDR315C	0.406121
YGR237C	0.36			YDR319C	0.309121
YER178W	-0.12			YDR320C	0.183226
YEL029C	0.31			YDR320C-A	-0.100914
YGR076C	0.39			YDR322C-A	0.650075
YDR034C-D	-0.75			YDR323C	0.289551
YPL024W	0.29			YDR324C	-0.422546
YGR255C	0.21			YDR326C	-0.266473
YDR270W	-0.24			YDR328C	0.304859
YJR109C	1.23			YDR329C	0.0610817
YER093C-A	0.49			YDR333C	-0.056534
YGR271C-A	0.19			YDR338C	-0.247242
YPL028W	-0.19			YDR339C	-0.175084
YDR258C	0.89			YDR341C	-0.623224
YOL100W	0.17			YDR342C	2.60789
YOL049W	0.15			YDR343C	2.6043
YDL090C	-0.16			YDR345C	0.222813
YNL115C	0.3			YDR346C	-0.90573
YMR267W	0.33			YDR348C	-0.30651
YLR251W	0.65			YDR349C	0.055667
YBR213W	-0.46			YDR350C	0.450554
YGL203C	-0.25			YDR357C	0.944782
YBR263W	-1.16			YDR359C	-0.497677
YJL060W	0.25			YDR361C	-0.504019
YLL027W	0.72			YDR362C	0.0133547
YOR252W	0.61			YDR364C	0.224332
YLR183C	-0.31			YDR365C	-0.161175
YFL037W	-0.35			YDR366C	0.952597
YFL002C	0.36			YDR369C	0.371678
YBR004C	0.46			YDR370C	0.494918
YGR135W	0.2			YDR372C	-0.000998202
YDL148C	0.23			YDR375C	0.00140195
YPL143W	-0.5			YDR378C	-0.00056308
YLR126C	0.61			YDR379C-A	0.9075
YPR084W	1.78			YDR381C-A	1.49
YJR089W	1.44			YDR383C	0.443763
YHL021C	0.77			YDR384C	0.667021
YIL019W	1.87			YDR387C	0.162415
YFR030W	-0.57			YDR390C	-0.0323048
YCR072C	1			YDR391C	2.23833
YKR095W-A	0.42			YDR397C	0.0136167
YCR042C	0.27			YDR402C	1.06646
YHR215W	-0.93			YDR404C	-0.537815
YOR191W	-0.18			YDR407C	-0.251357
YPL133C	0.67			YDR408C	-0.164928
YNR030W	-0.51			YDR410C	-1.24995
YBR095C	0.19			YDR411C	0.101621
YLL040C	0.28			YDR414C	-0.771026
YOR285W	0.24			YDR415C	-0.249247
YMR153W	0.21			YDR422C	-0.34807
YAR002C-A	-0.09			YDR423C	0.29957
YDL115C	0.31			YDR424C	-0.0600014
YJR136C	0.42			YDR428C	-0.852371
YKL207W	0.38			YDR429C	-0.184007
YOL019W	-0.26			YDR430C	0.36669
YNR032C-A	-0.69			YDR435C	0.208775
YPL019C	-1.05			YDR441C	-0.589904
YER180C-A	0.81			YDR443C	-0.168335
YMR228W	0.25			YDR445C	1.07989
YNL100W	0.71			YDR447C	-0.420338
YMR294W	0.21			YDR449C	-0.144346
YOR137C	-0.34			YDR451C	0.424479
YGR275W	0.25			YDR453C	1.62542
YMR108W	0.49			YDR454C	-0.872654
YBR159W	0.22			YDR458C	0.249836
YBR269C	0.54			YDR459C	0.0378515
YLR304C	0.68			YDR461C-A	0.128478
YGR205W	0.35			YDR465C	-0.277091
YNR034W	0.69			YDR468C	0.332428
YPR024W	0.39			YDR470C	0.310522
YBR158W	-0.47			YDR473C	0.455376
YPR019W	0.18			YDR475C	0.126588
YOR065W	0.39			YDR476C	-0.0492758
YDR212W	-0.12			YDR479C	0.719381
YPL183C	-0.16			YDR481C	-0.636987
YGR251W	0.88			YDR482C	0.265886
YPL175W	0.22			YDR485C	0.293607
YGR189C	0.6			YDR486C	0.104256
YLR218C	0.47			YDR487C	-0.440625
YDR201W	0.33			YDR488C	0.449569
YDR179W-A	0.35			YDR490C	0.583329
YBR037C	0.54			YDR495C	0.288714
YGL124C	0.26			YDR496C	-0.412013
YGL222C	1.08			YDR497C	0.307901
YOL018C	0.31			YDR498C	-0.0201379
YDR188W	-0.18			YDR500C	-1.12561
YMR037C	0.4			YDR502C	-0.234531
YGR235C	0.6			YDR503C	-0.242773
YMR295C	0.69			YDR504C	0.559408
YBR258C	0.48			YDR505C	0.295114
YLR293C	-0.11			YDR506C	0.280954
YMR194C-B	0.71			YDR507C	0.0410295
YKL071W	-0.44			YDR508C	0.312545
YPR140W	0.25			YDR512C	0.0606435
YER065C	-0.66			YDR514C	-0.19131
YMR132C	0.24			YDR516C	1.2638
YNL169C	0.2			YDR520C	-0.340792
YCR008W	-0.55			YDR523C	0.855537
YLR413W	-0.26			YDR524C	-0.339181
YCL005W-A	0.73			YDR524C-B	0.164397
YMR278W	0.55			YDR524C-A	-3.65081
YGR167W	0.36			YDR529C	0.505319
YEL020W-A	0.46			YDR530C	0.334774
YOR042W	0.4			YDR532C	0.258476
YDR135C	-0.08			YDR533C	0.188949
YBR048W	-0.56			YDR534C	1.03999
YCR030C	1.02			YDR535C	-0.44434
YNL065W	0.59			YDR540C	-0.647298
YGR126W	1.38			YDR541C	-0.0113886
YNL141W	0.54			YDL248W	0.846644
YGR108W	0.3			YDL244W	1.75405
YDL216C	0.45			YDL242W	1.81063
YPL173W	0.46			YDL241W	0.726716
YOR224C	0.45			YDL240W	-0.276224
YKL025C	0.25			YDL237W	-0.765501
YLR044C	-0.29			YDL236W	-0.193713
YPL260W	0.45			YDL233W	0.532236
YLR057W	0.19			YDL232W	-1.75071
YDR170C	-0.15			YDL230W	0.0712514
YLR432W	-0.38			YDL229W	-1.09569
YDR068W	0.73			YDL225W	-0.301264
YDL111C	0.37			YDL221W	0.120628
YGR042W	0.41			YDL219W	-0.447824
YOR117W	0.16			YDL218W	0.835489
YGL225W	0.94			YDL212W	-0.715615
YBR140C	0.28			YDL210W	0.323725
YDR074W	0.83			YDL208W	-0.590181
YLR450W	0.51			YDL207W	-0.626487
YLR439W	0.54			YDL206W	0.110047
YCR054C	0.7			YDL204W	3.96104
YOR206W	0.13			YDL202W	0.155521
YEL012W	0.2			YDL201W	-0.853827
YKR065C	0.31			YDL195W	-0.96992
YPR036W-A	0.87			YDL194W	0.629036
YER116C	0.61			YDL193W	-0.234967
YOL123W	0.19			YDL192W	-0.422593
YJR073C	0.73			YDL191W	-1.09708
YMR158W	0.69			YDL189W	-0.742004
YGL141W	0.26			YDL185W	-0.310825
YCR020C-A	-0.61			YDL182W	-0.251077
YLR355C	0.79			YDL181W	0.14845
YFR016C	0.25			YDL180W	-0.872412
R0020C	-0.25			YDL179W	-0.00379128
YLL023C	0.37			YDL178W	-0.00877353
YDR530C	0.16			YDL176W	0.591314
YGL057C	0.19			YDL173W	0.736605
YNL157W	0.68			YDL170W	0.170552
YML121W	1.02			YDL168W	0.295473
YJL061W	0.12			YDL165W	-0.38149
YGR200C	0.14			YDL161W	0.360347
YPR005C	0.34			YDL159W	-0.000699605
YLR214W	-0.98			YDL156W	0.221736
YBR149W	0.57			YDL155W	-0.141994
YDR352W	0.42			YDL154W	0.816315
YGL160W	0.43			YDL150W	-0.252773
YGL056C	0.36			YDL149W	0.711934
YLR182W	0.12			YDL147W	0.475768
YER129W	-0.24			YDL146W	-0.74354
YER018C	0.29			YDL143W	-0.606932
YCR026C	1.14			YDL141W	-0.528964
YGR180C	-0.46			YDL138W	-0.691192
YHR064C	-0.14			YDL137W	-0.26224
YEL020C	0.2			YDL136W	-0.984261
YMR027W	0.28			YDL133W	0.52757
YMR275C	0.11			YDL132W	-0.158421
YGR087C	-0.45			YDL131W	-0.0826172
YNL129W	0.28			YDL130W-A	2.46248
YLR233C	0.29			YDL130W	-1.12425
YCL001W	0.32			YDL129W	-0.702345
YGL043W	0.21			YDL128W	-0.525554
Q0140	0.27			YDL127W	-0.700205
YLR284C	0.45			YDL124W	1.64862
YKR096W	-0.5			YDL123W	0.139939
YJR148W	0.25			YDL122W	-0.306854
YDR345C	-1.13			YDL120W	0.467909
YHR056C	-0.22			YDL117W	-0.0429386
YDR517W	-0.34			YDL116W	-0.520934
YAL038W	-0.62			YDL112W	-0.628014
YMR217W	-0.56			YDL108W	-0.0123906
YLR300W	1.13			YDL107W	0.617708
YDR177W	0.35			YDL105W	0.260843
YCL037C	0.21			YDL102W	0.0381871
YGL041W-A	0.45			YDL099W	-0.0792687
YKL180W	-0.44			YDL095W	-1.35347
YDL213C	0.34			YDL093W	-0.631729
YGR112W	0.4			YDL092W	-0.2027
YDL004W	0.88			YDL089W	-0.301095
YNL200C	0.43			YDL086W	0.296506
YPR120C	0.42			YDL085W	2.55115
YOR308C	0.32			YDL084W	-0.612197
YBR166C	0.44			YDL082W	-0.992171
YBL105C	0.12			YDL075W	-0.803646
YMR116C	-0.73			YDL073W	-0.602282
YMR105C	0.98			YDL070W	-0.237401
YGL194C	0.49			YDL066W	-1.99041
YJL012C	-0.93			YDL064W	-0.395485
YIL042C	-0.17			YDL060W	-0.6879
YPL064C	0.52			YDL058W	-1.14784
YOR267C	0.22			YDL057W	0.564152
YKL133C	0.67			YDL056W	0.062991
YDL065C	0.86			YDL051W	-1.11898
YPR162C	0.17			YDL046W	-0.199194
YEL024W	0.29			YDL045W-A	0.222529
YDL137W	-0.72			YDL031W	-0.632355
YLR363W-A	0.55			YDL030W	-0.36402
YPL253C	-0.29			YDL029W	0.316721
YDR472W	0.35			YDL022W	1.81522
YDR129C	0.21			YDL021W	2.80781
YJL080C	-0.57			YDL017W	0.286507
YLR118C	0.41			YDL014W	-0.142569
YIL123W	0.48			YDL013W	-0.18895
YPL125W	0.43			YDL010W	0.116631
YLR237W	0.49			YDL008W	0.0470907
YPL040C	0.42			YDL007W	-0.176387
YGL179C	-0.82			YDL006W	-0.0818563
YHR201C	-0.16			YDL004W	-0.00342869
YJL024C	0.3			YDL003W	-0.413889
YGL018C	0.28			YDL001W	0.445868
YOR236W	-0.95			YDR002W	-0.199758
YNR043W	-0.36			YDR003W-A	-4.79783
YFL010C	0.43			YDR004W	0.0233641
YNR060W	-1.98			YDR007W	2.46661
YCR094W	0.5			YDR009W	2.07075
YLR348C	0.48			YDR011W	0.593379
YOR229W	0.27			YDR012W	-0.757552
YNL096C	-0.21			YDR013W	0.211653
YMR226C	0.43			YDR014W	0.304265
YGL202W	0.16			YDR014W-A	1.1159
YPL043W	0.16			YDR021W	-0.424759
YGR186W	0.6			YDR023W	-0.227762
YGL254W	0.72			YDR024W	4.68576
YEL065W	0.52			YDR025W	-0.749083
YDR206W	0.58			YDR031W	1.54114
YGR034W	-0.31			YDR033W	-0.747212
YPL097W	0.14			YDR034W-B	4.5845
YHR104W	0.8			YDR035W	-0.0662385
YNR017W	-0.38			YDR037W	-0.411688
YLR142W	0.68			YDR041W	0.427398
YOR138C	0.36			YDR044W	-0.201956
YJR134C	0.23			YDR047W	0.186575
YDL160C	0.86			YDR049W	0.0275002
YPR184W	1.25			YDR055W	1.77052
YLR353W	0.43			YDR057W	-0.100087
YPL063W	0.1			YDR060W	-0.718479
YEL011W	0.77			YDR061W	0.282128
YHR152W	0.37			YDR062W	-0.524928
YLR385C	0.27			YDR063W	-0.171131
YPR041W	-0.17			YDR064W	-0.988608
YBR282W	0.45			YDR065W	-0.0801598
YIL150C	-0.23			YDR068W	-0.006329
YER125W	0.24			YDR073W	-0.467706
YJR033C	0.23			YDR074W	1.57292
YML054C	0.42			YDR075W	-0.391213
YER153C	0.89			YDR076W	0.609008
YGR089W	0.15			YDR077W	2.44995
YPL084W	0.25			YDR079W	0.404342
YPL059W	0.16			YDR080W	0.315979
YPL066W	-0.53			YDR082W	1.33797
YPR074C	-0.88			YDR083W	-0.215368
YHR167W	0.23			YDR089W	0.109512
YBR108W	0.51			YDR092W	0.338911
YIL125W	0.46			YDR093W	-0.94518
YPL180W	0.31			YDR096W	0.369834
YJR142W	0.15			YDR099W	-0.21534
YOL033W	0.2			YDR100W	0.339998
YJR003C	-0.18			YDR103W	-0.140688
YHR039C-A	0.31			YDR106W	0.729717
YHR046C	0.17			YDR108W	-0.0994528
YJL100W	0.32			YDR110W	-0.626582
YHR159W	0.41			YDR115W	0.534841
YLR014C	0.4			YDR118W	-0.0531125
YBL027W	-0.25			YDR119W	-0.774428
YPL061W	-0.61			YDR119W-A	2.5907
YIR031C	0.43			YDR121W	-0.0769965
YDR001C	0.58			YDR122W	0.568906
YOR158W	0.33			YDR124W	0.307393
YBR126W-A	0.65			YDR126W	-0.0570955
YNL026W	0.14			YDR127W	0.0802469
YOR020C	0.51			YDR128W	-0.214188
YNL137C	0.22			YDR137W	0.24962
YOR243C	0.17			YDR138W	-0.290422
YLR250W	0.39			YDR140W	0.11577
YML006C	-0.27			YDR145W	0.26556
YCR106W	0.38			YDR147W	-0.17485
YER056C	-0.25			YDR150W	-0.568333
YPR094W	0.21			YDR152W	-0.0412827
YBR238C	0.33			YDR158W	-0.215496
YDL224C	0.22			YDR159W	-0.526321
YNR023W	0.17			YDR160W	-0.478063
YDL217C	0.19			YDR161W	-0.294036
YHL013C	0.49			YDR163W	0.352516
YER146W	-0.16			YDR165W	-0.68626
YHL023C	0.2			YDR167W	-0.0287197
YNL040W	0.36			YDR168W	-0.0542553
YJL098W	-0.2			YDR171W	2.16446
YOR361C	-0.11			YDR172W	-0.400344
YDR127W	0.4			YDR174W	-0.499742
YOL086C	-0.47			YDR176W	-0.439575
YMR178W	0.19			YDR177W	0.0529016
YOL056W	0.18			YDR178W	0.818413
YLR361C-A	0.45			YDR179W-A	-0.0356731
YMR297W	0.25			YDR180W	-1.25578
YDR287W	0.43			YDR182W	-0.376332
YDL147W	0.43			YDR183W	0.297534
YGL010W	0.31			YDR188W	-0.664319
YLR200W	1.05			YDR189W	-0.540801
YKL079W	0.25			YDR191W	0.28377
YOL142W	0.21			YDR195W	0.00817644
YDR379W	0.46			YDR197W	0.847372
YNL025C	0.53			YDR201W	-0.00712758
YMR004W	0.29			YDR204W	0.377459
YOL064C	-0.13			YDR205W	-0.236526
YOL073C	-1.27			YDR206W	0.162792
YMR212C	0.36			YDR208W	-0.129508
YIR009W	0.6			YDR210W	-0.0482823
YPL077C	2.51			YDR211W	-0.361825
YIL130W	0.16			YDR212W	-0.611492
YHR166C	-0.17			YDR213W	0.687831
YNL053W	0.31			YDR214W	0.751389
YGL020C	0.17			YDR216W	4.56108
YPL108W	0.29			YDR221W	-0.00548481
YDL074C	0.29			YDR222W	0.29356
YLR064W	0.2			YDR223W	-1.56364
YOR354C	0.37			YDR225W	0.18125
YDR041W	0.38			YDR226W	-0.881543
YBR054W	1.02			YDR227W	0.126871
YJL002C	-0.17			YDR229W	-0.125692
YBR272C	0.3			YDR232W	-0.964387
YOL051W	0.21			YDR234W	-0.459117
YDL092W	0.23			YDR235W	-0.16177
YOR288C	-0.28			YDR237W	0.0310982
YHR082C	-0.19			YDR241W	1.59027
YKL064W	0.26			YDR242W	1.62572
YHR154W	-0.15			YDR244W	0.525454
YDL126C	0.12			YDR245W	-0.648868
YMR014W	0.36			YDR246W	0.178872
YPL222W	-0.36			YDR247W	0.370193
YPR067W	0.26			YDR251W	-0.122628
YMR301C	-0.19			YDR252W	0.578481
YBL084C	0.22			YDR254W	0.833185
YPL093W	-0.38			YDR262W	0.555147
YIL118W	0.11			YDR265W	0.0829326
YER110C	-1.68			YDR268W	0.299946
YDR122W	0.2			YDR270W	-0.725873
YOR037W	0.33			YDR272W	0.530126
YCR004C	1.29			YDR273W	-0.984484
YBR241C	0.43			YDR275W	1.21538
YCL017C	0.33			YDR279W	-0.48958
YDR398W	0.47			YDR280W	-0.17395
YDR202C	0.39			YDR285W	0.594403
YLR228C	-0.31			YDR287W	0.197282
YPL092W	0.34			YDR288W	0.225969
YOR211C	0.3			YDR291W	-0.0486881
YHR065C	0.34			YDR296W	0.380912
YJR043C	-0.23			YDR297W	-0.373426
YDR189W	0.29			YDR299W	0.0858778
YDL053C	0.12			YDR301W	-0.912299
YPL058C	0.35			YDR302W	-0.285829
YDR092W	0.38			YDR307W	-0.383322
YMR028W	0.31			YDR311W	-0.357722
YOR145C	-0.34			YDR312W	-0.293737
YBR111C	0.87			YDR316W	0.818027
YOL044W	-0.52			YDR317W	-0.634565
YDR158W	0.38			YDR318W	0.512917
YFR015C	0.91			YDR321W	-0.542615
YGL227W	0.26			YDR322W	0.519426
YOL135C	0.16			YDR325W	-0.211167
YMR106C	0.22			YDR330W	0.0934631
YPR180W	0.38			YDR331W	-0.160314
YBL011W	-0.13			YDR332W	-0.531591
YHR018C	1.38			YDR334W	-0.640978
YFR043C	0.44			YDR335W	-0.282844
YKL065C	1.18			YDR336W	-0.818403
YFR010W	0.22			YDR337W	0.298748
YGR245C	-0.3			YDR347W	-0.242617
YDR063W	-0.18			YDR351W	-0.0897748
YBR080C	0.14			YDR352W	-0.529448
YDR349C	0.29			YDR353W	-0.360946
YKL122C	0.26			YDR354W	-0.336954
YCR009C	0.63			YDR356W	0.118459
YJR126C	-0.74			YDR358W	1.21827
YDR337W	0.64			YDR363W	0.42874
YBL007C	0.39			YDR363W-A	0.179747
YLR063W	0.31			YDR367W	-0.725791
YDR393W	0.26			YDR368W	-0.177431
YDL225W	0.13			YDR371W	0.299944
YPL219W	0.24			YDR374W-A	0.964719
YIL122W	0.24			YDR376W	-0.169665
YML048W	-0.25			YDR377W	0.369918
YBL085W	-0.09			YDR379W	0.590648
YMR098C	0.4			YDR380W	1.66674
YMR009W	0.25			YDR381W	-0.564032
YOR098C	-0.32			YDR382W	-0.983845
YBR176W	0.37			YDR385W	-1.19631
YDR458C	0.09			YDR386W	1.27081
YHR161C	0.61			YDR388W	0.280207
YFL041W	0.28			YDR389W	-0.623513
YJL133W	-0.19			YDR392W	-0.266473
YDL058W	-0.22			YDR393W	-0.0854712
YML027W	0.65			YDR394W	-0.338457
YMR039C	0.14			YDR395W	-0.641622
YBL013W	0.29			YDR398W	-0.252034
YJL117W	-0.56			YDR399W	-1.02619
YLR460C	0.39			YDR401W	1.37529
YJL184W	0.61			YDR403W	1.26575
YOL126C	0.91			YDR405W	0.541164
YIL155C	0.32			YDR406W	1.74934
YJR064W	-0.22			YDR409W	-0.101922
YNR040W	0.3			YDR412W	-0.296044
YPL170W	0.31			YDR416W	-0.300581
YBR135W	0.27			YDR418W	-0.916252
YER048W-A	0.35			YDR419W	-0.0778487
YGR092W	0.22			YDR420W	-0.706987
YPR097W	0.25			YDR421W	0.160321
YMR008C	0.28			YDR425W	0.0869276
YHL033C	-0.38			YDR427W	0.164954
YGL246C	0.15			YDR434W	-0.461615
YNL006W	0.53			YDR436W	0.710026
YLR181C	0.42			YDR438W	0.244892
YLR420W	0.28			YDR439W	-0.548198
YDL174C	0.33			YDR440W	-0.213388
YDR439W	0.3			YDR444W	-0.00763765
YBL047C	0.39			YDR448W	1.13634
YNL227C	0.19			YDR450W	-0.993716
YER002W	0.1			YDR452W	0.0446415
YKL148C	0.38			YDR456W	-0.397986
YPL031C	0.36			YDR457W	0.221109
YFL016C	0.5			YDR460W	0.317874
YDL226C	0.15			YDR461W	-9.32763
YMR213W	-0.22			YDR462W	0.875414
YIL094C	0.51			YDR463W	0.188403
YDL083C	-0.23			YDR464W	-0.435982
YLR187W	0.13			YDR466W	-0.243048
YOL098C	0.12			YDR469W	0.307515
YHR080C	0.36			YDR471W	-0.471053
YER052C	0.61			YDR472W	-0.464671
YHR030C	0.75			YDR477W	0.1958
YLL006W	0.34			YDR478W	0.347992
YGL002W	0.29			YDR483W	-1.39672
YDR305C	0.36			YDR484W	-0.0147622
YGL032C	-0.84			YDR489W	0.170526
YMR030W	-0.31			YDR492W	-0.421878
YHR041C	-0.38			YDR493W	0.897498
YDR299W	0.24			YDR494W	0.647107
YHR055C	-1.24			YDR499W	0.0437629
YML057W	0.86			YDR501W	-0.518628
YMR047C	0.19			YDR510W	-0.0774115
YDL082W	-0.82			YDR511W	1.24217
YHR007C	-0.31			YDR513W	1.07826
YHR165C	-0.18			YDR515W	0.0136559
YLR178C	0.54			YDR517W	-1.03497
YCL014W	0.37			YDR518W	-0.878197
YLL001W	0.21			YDR519W	-0.242637
YDR233C	-0.2			YDR525W-A	1.32171
YOR054C	0.22			YDR527W	-0.881698
YLR337C	0.26			YDR528W	-0.850009
YML013W	0.27			YDR531W	-0.411181
YML073C	-0.38			YDR536W	2.97169
YGR281W	-0.27			YDR538W	-0.59942
YDR306C	0.29			YDR539W	0.343234
YPL085W	-0.14			YEL073C	4.32286
YDR527W	-0.17			YEL068C	-0.856385
YNL083W	0.4			YEL064C	0.0730629
YPR124W	-0.51			YEL063C	0.703686
YBR197C	0.52			YEL061C	-0.260786
YER069W	0.77			YEL060C	1.52992
YDR171W	1.76			YEL059C-A	-0.166449
YJL111W	-0.06			YEL057C	0.662707
YDR262W	0.31			YEL055C	-1.05514
YER079W	1.03			YEL054C	-0.903856
YPL048W	-0.45			YEL053C	-0.457665
YHR132C	0.23			YEL050C	0.318079
YKL110C	0.56			YEL048C	0.56915
YBR043C	0.97			YEL047C	-0.282332
YDR465C	0.15			YEL046C	-0.0290709
YER081W	0.34			YEL039C	2.1089
YGL107C	0.27			YEL037C	-0.68625
YNL305C	0.77			YEL036C	-0.69588
YDR324C	0.1			YEL029C	-0.212226
YLR003C	0.11			YEL025C	-0.256707
YMR109W	0.26			YEL023C	-0.485012
YOR256C	-0.4			YEL017C-A	-1.86418
YBR287W	0.15			YEL016C	0.0159302
YDL054C	-0.28			YEL009C-A	-2.28725
YJR054W	-0.29			YEL009C	-0.707439
YNL173C	0.28			YEL008C-A	-0.594727
YMR189W	2.07			YEL005C	0.593198
YPL135W	0.21			YEL002C	-0.730491
YDR119W-A	0.52			YEL001C	-0.279903
YKR001C	0.08			YER003C	-0.686369
YDR072C	-0.39			YER007C-A	-0.355628
YCL026C-B	-0.23			YER008C	-0.227452
YCR017C	0.84			YER010C	0.135962
YDR182W	0.22			YER017C	0.358185
YER047C	0.14			YER018C	0.124605
YDR346C	-0.22			YER019C-A	-1.34265
YPL144W	0.48			YER026C	1.07904
YFL008W	0.26			YER027C	-0.316845
YDR443C	-0.42			YER028C	-3.03739
YGR217W	0.15			YER029C	-0.0605432
YLR437C	0.73			YER031C	-0.184113
YIL138C	0.62			YER033C	0.230993
YDR022C	1.09			YER036C	-1.06534
YIL111W	0.99			YER038C	0.144853
YMR031C	0.41			YER039C	-2.19939
YHL003C	0.38			YER043C	-0.433012
YBR072W	0.64			YER044C	-0.819865
YEL034W	-0.43			YER044C-A	1.7886
YGL144C	-0.45			YER045C	0.592387
YGL228W	0.11			YER047C	0.317192
YNL039W	0.38			YER048C	-0.168776
YJR123W	-0.17			YER050C	0.961658
YER158C	-0.32			YER052C	-0.10864
YER026C	0.5			YER053C	2.72744
YHL015W	-0.17			YER053C-A	1.87293
YKL026C	1.24			YER054C	4.12685
YLR094C	-0.19			YER055C	-0.128155
YGL242C	0.25			YER056C	-0.122802
YDR309C	0.34			YER056C-A	-0.481185
YDL008W	0.12			YER057C	-0.336394
YBL005W-B	-0.21			YER061C	-0.0787681
YBR009C	-0.9			YER062C	1.09344
YKL084W	-0.85			YER064C	0.606846
YDL215C	0.77			YER065C	-0.172465
YOR352W	0.41			YER071C	0.692971
YDL066W	-0.75			YER075C	-0.800664
YLR008C	0.31			YER076C	0.221966
YML052W	-0.3			YER077C	1.361
YHR001W	0.19			YER078C	-0.241924
YDL208W	0.16			YER082C	-0.427972
YGL011C	0.14			YER083C	-0.18813
YER132C	-0.33			YER087C-B	-1.25845
YBR117C	0.69			YER088C	-0.00487685
YNL249C	0.28			YER088C-A	-2.05074
YCR088W	1.12			YER089C	-0.450781
YGL129C	0.24			YER091C	-0.840211
YDR168W	0.07			YER093C	-0.392015
YPL255W	-0.22			YER093C-A	0.0783064
YCR051W	0.64			YER094C	0.046855
YBL017C	-0.09			YER099C	0.13639
YDL040C	0.14			YER101C	0.972543
YDR142C	-0.54			YER105C	-0.218771
YBR254C	0.41			YER107C	-0.541219
YIR034C	0.87			YER109C	0.754337
YJR051W	0.14			YER110C	-2.45021
YER167W	0.3			YER111C	-0.553826
YDR284C	0.37			YER113C	-0.808046
YFL034C-B	-0.16			YER114C	-0.432524
YGR229C	0.22			YER115C	-1.12298
YOR367W	0.53			YER116C	1.12876
YBR188C	0.29			YER118C	-0.409524
YOR272W	0.13			YER119C	0.248951
YDR067C	0.11			YER122C	-0.35618
YDL022W	1.13			YER124C	0.281457
YMR066W	0.34			YER126C	-0.147321
YDR381C-A	0.67			YER130C	0.876744
YJL088W	0.39			YER132C	-1.08723
YMR070W	-0.24			YER134C	0.235265
YDL130W	-0.8			YER137C	1.02013
YBL003C	0.17			YER139C	1.14283
YOR018W	0.25			YER142C	0.150441
YCL035C	1.15			YER144C	0.302443
YNL126W	-0.19			YER145C	-2.1596
YDL072C	0.76			YER147C	-0.157041
YDR196C	0.37			YER149C	-0.525924
YGL065C	0.2			YER151C	-0.410201
YPR154W	0.33			YER152C	-0.375165
YER156C	-0.14			YER155C	-0.19433
YGL111W	0.11			YER156C	-0.754326
YML130C	0.44			YER158C	-0.189136
YER049W	-0.15			YER159C	0.801342
YIL078W	0.21			YER161C	0.322987
YLR154C	0.49			YER162C	0.910668
YGR250C	0.29			YER163C	0.539908
YDL103C	0.14			YER168C	-0.212864
YHL030W	0.18			YER172C	0.615672
YKL056C	-0.47			YER174C	-0.320408
YNL192W	0.2			YER175C	1.49322
YKR095W	0.15			YER180C	-1.86934
YPL218W	-0.39			YER180C-A	1.10796
YJR059W	0.37			YER183C	-0.418565
YFR032C-A	-0.55			YER184C	0.416898
YJL198W	-0.25			YER186C	1.20841
YNL011C	0.38			YER188C-A	-4.09933
YMR157C	0.46			YEL072W	0.41219
YCR012W	0.83			YEL071W	-0.460399
YBR139W	0.74			YEL070W	3.84058
YDL089W	0.2			YEL066W	-0.333466
YOL109W	0.71			YEL065W	-0.221011
YLR206W	0.28			YEL062W	-0.151844
YOR301W	-0.35			YEL058W	-0.2525
YER127W	0.41			YEL056W	-0.270844
YJL171C	-0.08			YEL052W	-0.260107
YJL084C	0.43			YEL051W	-0.456666
YFR033C	0.61			YEL049W	0.343703
YGR078C	-0.18			YEL044W	-0.682396
YDR224C	0.53			YEL043W	-0.550998
YDR376W	0.28			YEL042W	-1.39811
YGR040W	0.6			YEL041W	1.04425
YIL067C	0.26			YEL040W	-0.930124
YDR500C	-0.42			YEL038W	-0.580041
YNL118C	1.02			YEL034W	-1.00524
YDL167C	-0.08			YEL033W	-0.907456
YOR155C	0.29			YEL032W	-0.345872
YDR427W	0.24			YEL031W	-1.07668
YML028W	-0.51			YEL030W	0.0973351
YHR072W	0.3			YEL028W	1.1173
YPR086W	-0.66			YEL027W	-0.430149
YAL012W	-0.13			YEL026W	-1.10021
YML034W	0.18			YEL024W	0.687173
YMR025W	0.45			YEL022W	-0.493147
YCL032W	0.63			YEL021W	-0.790166
YDL192W	-0.15			YEL020W-A	0.0098146
YMR244C-A	0.43			YEL018W	-0.460623
YJR048W	-0.59			YEL017W	-0.210653
YJL042W	0.24			YEL015W	0.301074
YML125C	-0.15			YEL013W	-0.13136
YKL176C	-0.21			YEL012W	0.695735
YEL058W	0.16			YEL011W	3.01315
YBL018C	-0.53			YEL008W	4.91686
YIL034C	0.25			YEL007W	-0.275009
YMR311C	0.86			YEL006W	-0.100259
YGR133W	-0.42			YEL004W	-0.254374
YGL098W	0.26			YEL003W	0.445316
YPR119W	0.12			YER001W	-0.728495
YLR127C	-0.24			YER002W	-0.183817
YIL050W	0.3			YER004W	-0.567799
YDR321W	-0.17			YER005W	-0.583961
YPR133W-A	0.16			YER006W	-0.589987
YNL050C	-0.19			YER007W	-0.00751052
YDR180W	-0.57			YER009W	-0.677247
YKL045W	0.21			YER011W	-1.16706
YGL187C	-0.19			YER012W	-0.188891
YML080W	0.18			YER013W	0.143845
YDR381W	-0.14			YER014W	-0.307932
YLL009C	1.04			YER015W	0.438847
YNR041C	0.26			YER016W	-0.331056
YCR036W	1.18			YER019W	-0.792276
YMR107W	0.45			YER020W	-0.100871
YJL035C	-0.34			YER021W	0.000600491
YNL297C	0.11			YER022W	0.138629
YER012W	0.37			YER023W	-1.02364
YNR013C	0.17			YER024W	1.5781
YIL159W	-0.19			YER025W	-0.522005
YKL126W	0.15			YER030W	-0.00182628
YDR148C	0.28			YER032W	0.092338
YMR285C	0.26			YER034W	0.252885
YML112W	-0.18			YER035W	1.71172
YMR042W	0.21			YER037W	0.797863
YLR087C	0.34			YER038W-A	0.965975
YDL012C	0.33			YER040W	-0.335527
YDR361C	0.13			YER041W	-0.234107
YOR385W	0.09			YER042W	-0.528677
YCL012C	0.89			YER046W	1.31589
YLR205C	-0.16			YER048W-A	0.102835
YBR212W	0.31			YER049W	-0.794386
YLR350W	0.16			YER051W	0.578838
YGR169C-A	1.74			YER058W	0.958168
YML022W	-0.18			YER059W	0.171452
YBR169C	0.56			YER060W	-2.99826
YKR069W	-0.18			YER060W-A	-0.439901
YJL130C	-0.75			YER063W	0.14605
YPL141C	-0.23			YER066W	-0.786832
YMR083W	0.14			YER067W	2.84378
YNL308C	0.55			YER068W	-0.404884
YBR029C	-0.29			YER069W	-0.0557306
YNL189W	0.38			YER070W	-0.0466826
YPL055C	0.25			YER072W	-0.743074
YHL040C	-0.46			YER073W	0.422397
YGL027C	-0.19			YER074W	-0.771969
YGL105W	0.4			YER074W-A	-0.456961
YPL131W	-0.18			YER076W-A	-0.121911
YPL111W	0.84			YER079W	1.66098
YNL220W	0.34			YER080W	-0.671088
YNL014W	-0.26			YER081W	0.144198
YBR283C	-0.27			YER084W	0.87953
YPL113C	0.55			YER086W	-0.772656
YLL048C	0.12			YER087W	0.132526
YLR100W	0.49			YER088W-B	-4.48137
YDR070C	0.39			YER090W	0.0319559
YDR475C	0.26			YER092W	1.13026
YGR102C	0.36			YER095W	0.733245
YBR074W	-0.19			YER096W	-0.377281
YDL063C	0.3			YER098W	0.559997
YPL139C	-0.08			YER100W	-0.0999167
YDR116C	0.21			YER102W	-0.831245
YDR255C	0.63			YER103W	2.61978
YEL056W	0.22			YER104W	1.33561
YJR068W	-0.18			YER106W	-0.334132
YPL232W	0.24			YER112W	-0.721005
YHR027C	0.08			YER117W	-0.51451
YFL053W	0.4			YER120W	-0.702037
YGR002C	-0.12			YER121W	2.61555
YGR014W	-0.45			YER123W	-0.10285
YBR112C	0.07			YER125W	-0.135636
YDR176W	0.16			YER127W	-0.406679
YKR066C	0.16			YER128W	0.328337
YPL123C	0.46			YER129W	-0.736317
YNL255C	0.8			YER131W	-1.0839
YOR358W	0.21			YER133W	-0.0572229
YBR198C	0.13			YER136W	-0.573343
YOR220W	0.57			YER138W-A	-3.85367
YGR210C	-0.36			YER140W	-0.850438
YOL063C	-0.3			YER141W	0.258927
YDR059C	1.21			YER143W	0.177091
YGL148W	0.05			YER146W	-0.414645
YOL059W	-0.1			YER148W	-0.852915
YDL161W	0.16			YER150W	4.17614
YNL251C	-0.33			YER154W	-0.593435
YGR270W	0.14			YER157W	-0.508681
YDR020C	0.15			YER164W	-0.600218
YLR072W	-0.3			YER165W	-1.42228
YBR071W	0.51			YER166W	0.078774
YCL039W	0.52			YER167W	0.415811
YDR214W	0.64			YER169W	0.103423
YCL047C	0.56			YER170W	0.591329
YDR139C	0.31			YER171W	-0.185431
YDR482C	-0.4			YER173W	0.631368
YKL189W	0.51			YER175W-A	1.86485
YGR177C	-0.4			YER176W	-0.262028
YLR390W	0.32			YER177W	-0.164456
YKL057C	-0.18			YER178W	-0.636151
YLR332W	0.26			YER179W	0.475601
YDL201W	-0.09			YER182W	0.437852
YJR062C	0.55			YER187W	0.0214868
YEL042W	-0.41			YER188W	0.442386
YDR490C	0.5			YFL057C	1.72192
YMR290C	-0.11			YFL054C	2.1719
YER020W	-0.19			YFL050C	0.0141818
YOL021C	0.19			YFL048C	-0.0795475
YHR204W	0.37			YFL045C	-1.21514
YPL129W	0.18			YFL044C	0.76377
YLL049W	-0.34			YFL042C	0.487836
YER057C	0.26			YFL039C	-0.669189
YOL141W	-0.3			YFL038C	0.0581074
YMR263W	0.15			YFL034C-B	-0.360437
YDR296W	0.36			YFL034C-A	-1.04467
YER061C	0.39			YFL033C	0.435402
YOL066C	0.66			YFL029C	0.373194
YDR245W	-0.13			YFL028C	0.130219
YDL238C	0.36			YFL027C	0.0563466
YGL244W	0.3			YFL025C	-0.472301
YGR185C	0.34			YFL024C	0.0976721
YDL164C	-0.15			YFL022C	-0.940818
YDL056W	0.14			YFL021C-A	-2.27386
YCR052W	0.24			YFL020C	1.15163
YGL245W	-0.1			YFL018C	0.216093
YMR079W	-0.61			YFL017C	0.251845
YOR372C	-0.78			YFL016C	0.311209
YBR104W	0.18			YFL013C	0.491526
YHR073W	-0.31			YFL010C	0.211965
YOR095C	-0.92			YFL003C	-0.283677
YLR179C	-0.38			YFL002C	-0.243275
YKR018C	0.12			YFR003C	0.881239
YBR086C	0.08			YFR005C	-0.269953
YPL046C	0.28			YFR011C	0.40981
YPR166C	0.25			YFR014C	0.697964
YBR125C	-0.24			YFR015C	3.07348
YIL096C	0.83			YFR016C	0.385494
YNL153C	0.55			YFR017C	3.72111
YMR058W	-1.52			YFR018C	-0.343334
YKR037C	0.22			YFR024C-A	-0.252237
YKR067W	0.23			YFR025C	-0.295152
YMR233W	0.49			YFR026C	0.467723
YDL236W	0.18			YFR028C	-0.95802
YIL156W	0.19			YFR031C	-0.235719
YGL009C	0.52			YFR031C-A	-0.666258
YOR357C	0.77			YFR032C-A	-0.697681
YJL121C	-0.8			YFR033C	0.333593
YER030W	1.52			YFR034C	-0.0520416
YNL185C	0.37			YFR037C	-0.10523
YGL127C	-0.42			YFR039C	-0.790127
YNL134C	0.32			YFR041C	0.0614655
YKR042W	0.88			YFR043C	0.3634
YER075C	-0.7			YFR044C	-0.183884
YGR150C	0.48			YFR046C	0.482155
YBR177C	0.08			YFR047C	-0.44721
YJL078C	0.27			YFR050C	-0.0350433
YGR124W	0.21			YFR051C	-0.662174
YLR440C	-0.2			YFR053C	3.39814
YHR072W-A	0.3			YFL055W	0.898685
YDR077W	2.01			YFL053W	1.57192
YAR028W	0.58			YFL052W	3.25723
YPR191W	0.15			YFL049W	0.207196
YLR369W	0.24			YFL047W	-0.398181
YGR148C	-0.94			YFL046W	0.128016
YPL098C	0.31			YFL041W-A	-3.6437
YML041C	0.2			YFL041W	-0.813465
YOR076C	0.15			YFL037W	-0.964948
YOR027W	0.07			YFL036W	-0.14785
YDR118W	-0.23			YFL034W	-0.0829169
YDR289C	0.17			YFL031W	-0.488099
YBR093C	-1.16			YFL030W	2.86922
YMR184W	-0.15			YFL026W	-15.0028
YNL130C	0.17			YFL023W	-0.158596
YNL037C	0.41			YFL021W	-0.171041
YHR190W	0.16			YFL017W-A	-0.195192
YFL029C	0.09			YFL014W	6.3578
YCR019W	1.01			YFL011W	-1.07591
YAL010C	0.26			YFL009W	-0.423027
YIL038C	0.08			YFL008W	0.137721
YER154W	0.18			YFL007W	-0.234401
YKL028W	-0.26			YFL005W	-0.157289
YNR021W	0.25			YFL004W	-1.02519
YOL058W	1.66			YFL001W	-0.721276
YIL070C	0.18			YFR001W	-0.174737
YML129C	0.59			YFR002W	-0.316209
YGR239C	0.47			YFR004W	0.219589
YBL050W	0.31			YFR006W	0.113628
YPL117C	0.41			YFR007W	0.378324
YHR170W	-0.16			YFR008W	1.04799
YDR032C	0.27			YFR009W	-0.187823
YLR225C	0.77			YFR010W	0.20111
YFL026W	-2.03			YFR013W	-0.365223
YJL136C	-0.23			YFR019W	0.366764
YAL034W-A	-0.11			YFR020W	-1.47449
YNR019W	0.24			YFR021W	-0.726515
YDL047W	0.28			YFR022W	1.05053
YKR038C	0.17			YFR023W	-0.574343
YDL106C	0.19			YFR027W	0.647438
YGL094C	0.28			YFR029W	-0.17079
YNL287W	-0.15			YFR030W	-1.27535
YIR032C	0.49			YFR034W-A	-2.64679
YJL046W	0.3			YFR038W	-0.152564
YBR262C	0.79			YFR040W	-0.648316
YDR356W	0.07			YFR042W	-0.328709
YOR239W	-0.08			YFR045W	0.481575
YKL024C	-0.48			YFR048W	0.0669898
YOR226C	1.17			YFR049W	0.113593
YJL176C	-0.34			YFR052W	-0.0384561
YOR160W	0.2			YFR055W	-0.11455
YLR382C	0.14			YGL257C	-0.835649
YMR104C	0.96			YGL252C	0.214339
YHR199C	-0.3			YGL251C	1.17741
YDR084C	0.17			YGL246C	0.0209005
YNL008C	0.21			YGL242C	0.650657
YNL234W	-0.51			YGL237C	0.469053
YLR362W	0.33			YGL236C	-0.0252768
YNL176C	0.49			YGL231C	0.000113547
YDR363W-A	1.6			YGL230C	1.38669
YAL033W	0.26			YGL229C	-0.138998
YPL032C	-0.43			YGL226C-A	-0.808565
YCR005C	0.55			YGL224C	0.0868656
YDR137W	0.18			YGL223C	-0.349921
YOR207C	0.19			YGL222C	1.86677
YJL172W	-0.13			YGL221C	-0.0818407
YCR016W	0.93			YGL219C	0.429162
YHR176W	-0.55			YGL213C	-0.118548
YPR069C	-0.83			YGL206C	-0.619241
YEL051W	0.14			YGL204C	-1.13192
YLR138W	0.33			YGL203C	-0.689644
YPL120W	-0.32			YGL201C	-0.0971743
YPL211W	0.11			YGL200C	-1.2373
YPR052C	0.32			YGL199C	-3.62684
YDR261C	-0.37			YGL194C-A	-0.295732
YPL237W	-0.16			YGL194C	0.142399
YJL178C	0.41			YGL193C	1.5612
YLR216C	0.31			YGL190C	-0.217712
YDL027C	0.27			YGL189C	-1.30908
YGR006W	0.83			YGL187C	0.415838
YMR202W	0.4			YGL186C	-0.803456
YBR127C	-0.29			YGL185C	0.552704
YKL208W	0.28			YGL184C	-0.00654098
YOR375C	0.8			YGL179C	-0.571792
YAL023C	-0.29			YGL176C	-0.434414
YGR191W	-0.4			YGL175C	-0.214624
YJL212C	-0.34			YGL173C	0.110501
YGL063W	0.33			YGL167C	-0.673574
YPL160W	-0.11			YGL165C	0.120628
YPR145W	0.56			YGL164C	0.0770246
YER163C	0.39			YGL163C	0.261633
YFL059W	0.39			YGL161C	0.2877
YCL034W	0.3			YGL154C	-0.0705726
YGR083C	0.22			YGL150C	-0.000824642
YHR137W	0.82			YGL147C	-0.946967
YGL008C	-0.3			YGL146C	0.865403
YDL209C	0.46			YGL144C	-0.398282
YOR129C	0.22			YGL143C	0.0880864
YLR371W	0.23			YGL142C	-0.759675
YMR166C	0.17			YGL140C	-0.422664
YLR088W	0.67			YGL136C	0.197804
YDR226W	-0.28			YGL131C	0.64738
YDL046W	0.3			YGL129C	-0.215904
YBL004W	-0.38			YGL128C	0.335108
YAR003W	0.18			YGL127C	-0.473169
YGR116W	-0.18			YGL124C	0.935133
YOL048C	0.49			YGL122C	-0.571537
YER176W	-0.07			YGL121C	3.46932
YFL038C	0.28			YGL120C	-0.812728
YLR426W	-0.27			YGL112C	0.0375659
YMR048W	0.29			YGL110C	0.378938
YLL032C	0.19			YGL108C	0.490944
YJR103W	0.14			YGL107C	0.117968
YFL049W	-0.47			YGL104C	0.710111
YOR259C	0.29			YGL095C	0.389344
YOL070C	0.25			YGL094C	-0.495109
YLL002W	0.15			YGL091C	0.462065
YHR138C	0.24			YGL089C	5.20406
YCR084C	0.39			YGL087C	0.679348
YDR119W	0.11			YGL084C	-0.70022
YER072W	-1.18			YGL078C	-0.758891
YOL071W	0.33			YGL077C	-0.47794
YNR024W	0.71			YGL076C	-0.990532
YGR184C	-0.15			YGL075C	0.20568
YIR021W	0.12			YGL072C	-1.69223
YDL091C	0.16			YGL070C	0.324584
YDL001W	0.21			YGL065C	-0.252336
YDR117C	0.09			YGL064C	0.472756
YBR115C	0.54			YGL061C	-0.049276
YGL122C	0.51			YGL057C	0.399235
YLR060W	0.12			YGL056C	0.247202
YNL104C	0.98			YGL054C	-0.622761
YCR092C	0.48			YGL049C	-0.172865
YGR234W	0.16			YGL048C	0.291873
YKR007W	0.61			YGL044C	0.236454
YCR027C	1.12			YGL040C	-0.415235
YKL062W	0.88			YGL038C	0.225339
YHR074W	0.12			YGL037C	2.12777
YER169W	0.07			YGL035C	-0.163345
YMR223W	0.25			YGL032C	-8.59041
YFL018C	0.35			YGL031C	-0.764749
YMR197C	0.94			YGL028C	-0.188054
YPR111W	0.4			YGL027C	-0.975762
YLR386W	0.16			YGL026C	0.121492
YCR053W	1.01			YGL025C	-0.347882
YKL168C	0.35			YGL023C	-0.302866
YAR035W	1.01			YGL020C	-0.492894
YHR172W	0.24			YGL018C	0.640616
YER136W	-0.14			YGL013C	-0.129346
YGL022W	-0.18			YGL011C	-0.0207204
YJR104C	0.76			YGL009C	0.302555
YOL053W	0.37			YGL008C	-0.483873
YDL117W	0.2			YGL007C-A	-6.56757
YJR057W	0.18			YGL005C	-0.0419129
YOR294W	0.55			YGL004C	-0.246372
YDR348C	0.09			YGL003C	-0.184334
YKL075C	0.22			YGL001C	-0.190845
YKL164C	0.56			YGR001C	-0.178239
YLL035W	-0.17			YGR002C	0.211601
YMR310C	-0.31			YGR005C	0.201008
YBL041W	0.13			YGR008C	2.68999
YDL077C	-0.15			YGR009C	0.483882
YDL081C	-0.98			YGR015C	0.261479
YGR240C	-0.24			YGR020C	-0.665595
YGL257C	-0.22			YGR024C	-0.426683
YER068W	0.41			YGR027C	-0.675507
YNL117W	0.28			YGR030C	0.663866
YDR489W	0.23			YGR033C	0.0166455
YNR020C	0.2			YGR035C	-1.1989
YPR122W	-0.31			YGR036C	-0.142761
YBR005W	0.23			YGR037C	-0.843022
YJL137C	-0.3			YGR043C	3.33539
YOR103C	-0.21			YGR044C	0.293791
YJL139C	-0.49			YGR045C	0.458571
YBR256C	0.87			YGR047C	-0.241802
YBR257W	-0.73			YGR050C	-0.828016
YBR249C	0.54			YGR053C	0.848518
YGR233C	-0.48			YGR057C	0.84281
YJR097W	0.2			YGR061C	-0.996484
YPR100W	0.42			YGR062C	-0.403249
YHR186C	0.12			YGR063C	0.373138
YMR200W	0.19			YGR065C	-0.198931
YNL147W	0.07			YGR067C	1.71019
YOR265W	0.24			YGR068C	0.388215
YFR001W	0.16			YGR071C	-0.221499
YBR083W	0.8			YGR073C	0.120628
YHR101C	0.1			YGR075C	0.906691
YKL127W	-0.72			YGR076C	0.578356
YOR063W	-0.12			YGR077C	-0.414972
YDR411C	0.6			YGR078C	-0.499471
YOL080C	0.31			YGR081C	-0.0932956
YBL002W	2.64			YGR083C	-0.225624
YMR220W	0.34			YGR084C	0.334624
YGL237C	-0.43			YGR085C	-0.753626
YBL010C	-0.11			YGR086C	0.0892859
YLR034C	0.15			YGR087C	-0.000685266
YHR128W	0.07			YGR095C	-0.259561
YOL122C	-0.32			YGR098C	-0.471334
YHR158C	0.15			YGR102C	0.513424
YOR197W	-0.53			YGR104C	-0.0678748
YLR295C	0.13			YGR106C	-1.06291
YJR144W	0.25			YGR109C	0.830039
YGR028W	0.1			YGR117C	-0.389708
YNL071W	0.67			YGR119C	-0.197155
YPR036W	0.13			YGR120C	-0.146023
YKR039W	0.35			YGR121C	-0.757319
YKL060C	-0.71			YGR122C-A	-0.582094
YNL326C	-0.24			YGR123C	-1.21419
YGR043C	0.42			YGR128C	-0.836293
YER143W	0.27			YGR130C	0.573123
YKL155C	0.22			YGR132C	0.181769
YIL075C	0.29			YGR138C	0.0136248
YOL125W	-0.54			YGR146C	0.178153
YIL093C	0.2			YGR146C-A	-1.49702
YGR263C	-0.43			YGR147C	-0.107571
YNL212W	0.17			YGR148C	-0.834165
YJR060W	-0.38			YGR150C	0.00028012
YDR266C	0.4			YGR154C	0.708717
YJR100C	0.09			YGR158C	-0.307249
YHL002W	0.31			YGR159C	-0.86851
YLR009W	-0.25			YGR161C	2.00915
YBR236C	0.33			YGR168C	0.355784
YMR113W	0.21			YGR169C	-0.032584
YPR095C	0.2			YGR169C-A	0.508231
YNL292W	-0.21			YGR171C	-0.389458
YGL252C	0.43			YGR172C	0.0786087
YCR028C-A	0.81			YGR174C	1.28162
YJL047C	-0.06			YGR175C	-0.362626
YPR028W	1.08			YGR177C	-0.941007
YML108W	0.22			YGR178C	-0.0514247
YMR258C	0.15			YGR179C	0.544903
YMR255W	0.21			YGR180C	-0.784004
YJL031C	0.23			YGR182C	-2.30882
YDR328C	0.45			YGR183C	1.36149
YHR042W	-0.54			YGR184C	-0.228984
YDR213W	0.27			YGR185C	-0.26842
YDR435C	0.3			YGR187C	-0.674819
YMR205C	-0.13			YGR188C	-1.17412
YAL055W	0.25			YGR189C	0.917993
YOR204W	0.12			YGR192C	-1.03634
YBR193C	0.19			YGR193C	0.142014
YER102W	-0.18			YGR194C	1.2833
YNL155W	-0.05			YGR196C	0.287286
YKL005C	0.13			YGR197C	0.14494
YOR250C	0.12			YGR200C	-0.279949
YPL259C	-0.07			YGR201C	1.12898
YNL046W	0.61			YGR202C	-0.874985
YOL087C	0.29			YGR207C	1.04842
YLR045C	0.21			YGR209C	0.462831
YIR026C	0.15			YGR210C	-0.830725
YDR181C	0.36			YGR213C	2.52641
YBR243C	0.13			YGR216C	-0.219241
YOR330C	-0.44			YGR220C	0.379818
YBR044C	-0.07			YGR221C	0.439954
YNL102W	0.12			YGR223C	0.465737
YGL140C	-0.12			YGR229C	-0.276739
YDL097C	0.38			YGR231C	-0.0260667
YOL041C	0.06			YGR233C	-0.635406
YGL054C	-0.38			YGR235C	0.835244
YML014W	0.5			YGR236C	3.91816
YGR065C	-0.48			YGR237C	0.316085
YOR216C	0.23			YGR238C	0.330668
YOR150W	0.28			YGR239C	1.24449
YDR264C	0.33			YGR240C	-0.604317
YGL155W	-0.2			YGR241C	-0.470267
YDR310C	-0.23			YGR244C	0.821417
YPL124W	0.19			YGR245C	-0.578791
YLR047C	-0.11			YGR246C	0.379329
YNL123W	0.12			YGR250C	0.497535
YDL197C	-0.47			YGR253C	0.345596
YLR068W	0.16			YGR255C	-0.00375772
YHR122W	-0.12			YGR257C	-0.380178
YIL003W	0.18			YGR258C	0.440102
YNR065C	-0.28			YGR259C	1.56241
YIL105C	0.13			YGR261C	0.00764622
YKL058W	0.15			YGR262C	0.101506
YIL007C	0.75			YGR263C	-0.56222
YPL274W	0.32			YGR264C	-0.806817
YKL012W	0.14			YGR267C	-0.373376
YBL051C	0.1			YGR268C	0.718418
YNL004W	0.4			YGR271C-A	-0.423675
YBR218C	0.08			YGR274C	-0.540233
YLR367W	-0.15			YGR276C	-0.687714
YBR079C	0.03			YGR277C	-0.447599
YCR082W	-0.12			YGR279C	-0.638384
YPR112C	0.1			YGR280C	0.118511
YHL010C	0.43			YGR282C	0.557159
YHR084W	0.05			YGR283C	-0.777067
YPL036W	-1.06			YGR284C	-0.106147
YLR167W	-0.13			YGR285C	-0.685639
YLR314C	0.1			YGR286C	-1.37075
YOL013C	0.18			YGR287C	0.557128
YDR316W	0.23			YGR289C	1.09567
YJR119C	0.31			YGL258W	-1.78939
YDR477W	0.14			YGL256W	-1.316
YKL175W	0.15			YGL255W	-1.36915
YCL031C	0.67			YGL254W	0.215753
YLR397C	-0.1			YGL253W	-0.960855
YCL011C	0.46			YGL250W	0.678841
YPL101W	0.52			YGL248W	1.16203
YPL231W	0.13			YGL247W	0.080201
YKR035W-A	0.73			YGL245W	-0.572573
YOL023W	0.26			YGL244W	0.165394
YBR280C	0.19			YGL243W	0.69674
YDR511W	0.57			YGL241W	-0.158129
YLL024C	-0.35			YGL240W	1.33688
YNL224C	0.1			YGL238W	-0.250359
YPL038W	0.11			YGL234W	-0.422218
YNL320W	0.24			YGL233W	-0.326875
YGR005C	0.19			YGL232W	-0.289481
YIL074C	-0.26			YGL228W	-0.697961
YKL213C	-0.11			YGL227W	0.4605
YPR143W	0.18			YGL226W	0.862448
YBR061C	0.15			YGL225W	-1.10516
YER073W	0.69			YGL220W	-0.49356
YIL022W	0.09			YGL216W	-0.26719
YOR189W	0.6			YGL215W	-1.22548
YNL317W	-0.19			YGL212W	0.826617
YKL120W	0.37			YGL211W	0.270156
YKL091C	0.36			YGL210W	-0.590261
YNL048W	0.61			YGL209W	-0.392343
YKL179C	0.24			YGL208W	0.702268
YGL005C	0.11			YGL207W	-0.267437
YFR047C	-0.1			YGL205W	4.14822
YER120W	-0.09			YGL202W	-0.872712
YLR084C	0.17			YGL198W	0.298118
YJL003W	0.13			YGL197W	0.125777
YLR277C	0.12			YGL196W	-0.309907
YOR198C	-0.36			YGL195W	-0.257518
YDL178W	0.11			YGL191W	1.04233
YCL009C	0.57			YGL181W	0.414697
YOR152C	0.35			YGL180W	0.43476
YGL030W	-0.52			YGL178W	-0.140823
YBL099W	0.23			YGL174W	0.310395
YPL215W	0.42			YGL172W	-0.543134
YLR215C	0.1			YGL171W	-0.460647
YKL205W	-0.15			YGL169W	-0.167592
YNL225C	0.1			YGL166W	0.452029
YAR033W	0.58			YGL162W	0.0285643
YNR054C	0.1			YGL160W	-0.388905
YOL152W	-0.26			YGL159W	-0.407403
YBR227C	0.07			YGL158W	0.485996
YLR131C	0.34			YGL157W	0.0913023
YNL119W	0.14			YGL156W	2.6393
YOR090C	0.07			YGL155W	-0.198388
YGL181W	0.53			YGL153W	-0.290035
YGR001C	0.14			YGL151W	0.0802912
YPL266W	0.15			YGL148W	-0.554625
YOL042W	0.19			YGL145W	-0.180775
YGR194C	0.53			YGL141W	0.465877
YGR196C	0.12			YGL139W	-0.482236
YKR093W	-0.43			YGL137W	-0.589564
YBR155W	-0.12			YGL135W	-0.817924
YLR423C	0.69			YGL134W	0.122295
YNL091W	0.12			YGL133W	0.120359
YIL047C	-0.21			YGL130W	0.286986
YGL023C	0.13			YGL125W	1.30823
YJL158C	0.52			YGL123W	-1.09821
YDR246W	0.24			YGL119W	-0.743557
YHL031C	-0.07			YGL117W	0.718771
YBR141C	0.23			YGL116W	0.0891931
[truncated: 3,487 more rows]
