# Supplementary material for: Decapping factor Dcp2 controls mRNA abundance and translation to adjust metabolism and filamentation to nutrient availability
Source: eLife journal article supplement (doi:10.7554/elife.85545), 2023-06-02
Supplement: fig5-data1 [file Figure 5 – source data 1.xlsx]

## Sheet: Sheet1
	A600 (avg of 2)	Area under 40S and 60S	ribosmes subunits/OD
WT_1	1.257	62465	49693.7
WT_2	1.253	63141	50391.9
WT_3	1.257	63755	50720
dcp2_1	1.274	44070	34591.8
dcp2_2	1.272	45634	35875.8
dcp2_3	1.274	44965	35294.3
	Ribo/OD
dcp2_1/WT_1	0.696101
dcp2_2/WT_2	0.711936
dcp2_3/WT_3	0.695867
dcp2/WT	0.701301
SD	0.00921078
SD/2	0.00460539
