# Supplementary material for: Decapping factor Dcp2 controls mRNA abundance and translation to adjust metabolism and filamentation to nutrient availability
Source: eLife journal article supplement (doi:10.7554/elife.85545), 2023-06-02
Supplement: fig5-figsupp1-data1 [file Figure 5 – figure supplement 1 – source data 1.xlsx]

## Sheet: WT_SM
gene_ID	TE changes (log2FoldChange WT+SM vs WT1)	pvalue	padj (FDR)
YDR534C	6.54318	1.31127e-05	0.00014066
YJR107W	5.17111	0.000547129	0.00321189
YLR343W	5.14053	0.000731747	0.0041235
YEL009C	5.09558	3.55333e-14	4.32954e-12
YBR063C	4.6499	0.00208346	0.00969503
YKL165C-A	4.41373	0.00893363	0.0314599
YML084W	4.36407	0.015763	0.0499298
YPL033C	4.15834	0.00853522	0.0302316
YJL106W	3.64683	0.0120944	0.0401414
YCL026C-A	3.39375	0.00015402	0.00115029
YEL049W	3.36721	0.00107434	0.0056969
YKL065W-A	3.35304	0.00106809	0.00566924
YKL220C	3.33826	0.00185974	0.00882855
YDR256C	2.65562	0.00653973	0.0243927
YDR042C	2.63717	0.000201549	0.00142593
YDL232W	2.52865	2.55934e-10	1.24185e-08
YDR524C-B	2.52351	1.47793e-18	5.78821e-16
YOR182C	2.52173	6.08068e-20	3.33404e-17
YER065C	2.48616	9.20553e-15	1.32826e-12
YLR287C-A	2.46421	8.22757e-19	3.75931e-16
YFL014W	2.41269	1.67273e-18	6.11437e-16
YHL046C	2.40646	0.000525342	0.00310728
YFL020C	2.40181	0.00105017	0.00560122
YIL059C	2.23239	0.000843471	0.00464799
YOL109W	2.20685	7.33569e-16	1.34072e-13
YNL135C	2.17671	8.10704e-14	8.89018e-12
YER131W	2.112	9.8246e-17	2.44856e-14
YOR313C	2.10171	0.00319977	0.0137927
YPR145C-A	2.09238	0.000366565	0.0023182
YPL143W	2.0787	6.62903e-17	1.81735e-14
YNR073C	2.06076	0.00152898	0.00752472
YGL189C	2.05921	1.21501e-12	9.94315e-11
YDR242W	2.04063	3.82371e-06	4.97991e-05
YNR034W-A	2.04034	8.88268e-10	3.50386e-08
YDL075W	2.01816	2.28399e-14	2.91235e-12
YOR308C	2.01732	8.51219e-10	3.38205e-08
YOR234C	2.00305	1.10855e-18	4.67554e-16
YLR010C	1.98791	0.00139019	0.00700588
YDR320C-A	1.97883	1.98858e-07	4.0086e-06
YGL108C	1.9722	3.80925e-09	1.23586e-07
YOR167C	1.97175	4.72708e-16	9.25663e-14
YNL162W-A	1.95243	0.00116158	0.00603693
YPL272C	1.94252	0.000334444	0.00216949
YER048W-A	1.94246	3.54808e-10	1.60778e-08
YMR122W-A	1.93162	1.63815e-08	4.42462e-07
YNL030W	1.91926	1.16645e-12	9.69039e-11
YDR224C	1.89678	5.06654e-14	5.9106e-12
YLR037C	1.89352	0.00844862	0.029983
YOR148C	1.87921	4.94965e-07	8.48091e-06
YDR210W	1.86698	4.64124e-10	2.00377e-08
YBR009C	1.86424	5.19349e-12	3.79679e-10
YJL179W	1.8568	1.74739e-08	4.69653e-07
YML058W-A	1.8446	0.000810085	0.00450476
YOL077W-A	1.84098	1.95965e-09	6.88767e-08
YLR453C	1.84046	7.59838e-05	0.000627439
YPL267W	1.83946	3.71133e-05	0.00033972
YLR061W	1.80976	6.42453e-12	4.57476e-10
YBR010W	1.79699	1.40756e-17	4.28758e-15
YER024W	1.79384	9.19755e-11	4.89613e-09
YAR050W	1.79051	0.000402847	0.00251561
YHR039C-A	1.77768	4.9048e-10	2.10102e-08
YNR069C	1.76811	0.00243153	0.0110092
YNL015W	1.76728	3.33225e-08	8.19315e-07
YJL136C	1.76484	9.48455e-13	8.25457e-11
YMR251W-A	1.7413	2.75789e-09	9.16455e-08
YNL230C	1.73835	2.33315e-06	3.25513e-05
YBR230C	1.73385	6.16898e-16	1.16636e-13
YNL031C	1.73358	6.30275e-14	7.05265e-12
YGR209C	1.73251	6.0113e-12	4.33684e-10
YKL192C	1.73127	1.7678e-10	8.8117e-09
YDR461W	1.71031	1.15753e-05	0.000127445
YOL052C-A	1.67684	1.97946e-08	5.21798e-07
YML073C	1.6758	2.55193e-13	2.45478e-11
YDR447C	1.66903	2.52484e-13	2.45478e-11
YKL156W	1.6676	4.52112e-15	7.08266e-13
YER074W	1.66538	5.7385e-13	5.15806e-11
YEL070W	1.65032	0.00725884	0.0266579
YML024W	1.64782	2.63168e-12	2.03233e-10
YER056C-A	1.64354	1.51925e-09	5.58565e-08
YMR002W	1.63644	2.59213e-07	4.95215e-06
YEL026W	1.63425	1.53672e-10	7.7301e-09
YKL160W	1.63362	2.03037e-10	1.00293e-08
YKR091W	1.63251	4.01357e-06	5.14169e-05
YEL072W	1.63232	0.011504	0.038579
YAL034C	1.62359	1.70527e-09	6.1111e-08
YBL029C-A	1.61497	3.27005e-08	8.07643e-07
YIL069C	1.61463	2.86938e-13	2.66657e-11
YKR035W-A	1.60861	3.41705e-08	8.32697e-07
YHR184W	1.60417	0.00302883	0.0132117
YMR230W	1.60269	3.7258e-14	4.441e-12
YHR152W	1.59287	7.80056e-06	8.96655e-05
YGL187C	1.57786	1.21818e-10	6.18449e-09
YDR025W	1.57558	1.67472e-09	6.08113e-08
YHR021C	1.57166	2.38854e-13	2.42202e-11
YDL044C	1.57119	9.60885e-07	1.49674e-05
YGL226C-A	1.56931	5.93743e-07	9.86514e-06
YML093W	1.56481	2.26857e-08	5.89504e-07
YLR264W	1.56309	4.62662e-11	2.57431e-09
YCR097W	1.5612	0.000252458	0.00173028
YAL030W	1.55665	8.17585e-08	1.78598e-06
YBR252W	1.54986	2.85762e-08	7.1545e-07
YKR095W-A	1.54866	6.83594e-05	0.000574869
YDR424C	1.54669	2.99101e-07	5.57886e-06
YGR239C	1.54214	1.01713e-06	1.5754e-05
YGL147C	1.53818	2.0665e-09	7.17129e-08
YLR340W	1.53265	3.45822e-07	6.36289e-06
YDR223W	1.5281	0.0127888	0.0418634
YHR011W	1.51449	2.51591e-06	3.48351e-05
YOR045W	1.5143	4.59563e-05	0.000407074
YLR170C	1.51391	1.38391e-06	2.03977e-05
YKR074W	1.51124	5.99575e-09	1.79643e-07
YLL055W	1.51085	1.77689e-05	0.00018279
YHR010W	1.50875	6.28755e-08	1.40713e-06
YBR119W	1.49982	3.91022e-07	7.02943e-06
YER002W	1.49533	5.45537e-06	6.64707e-05
YHR148W	1.49439	7.1721e-06	8.38478e-05
YDL136W	1.49018	1.29778e-09	4.83087e-08
YOR327C	1.48906	3.39684e-08	8.31468e-07
YDL191W	1.48381	1.69624e-09	6.1111e-08
YLR325C	1.47918	1.0482e-12	8.84197e-11
YJR135W-A	1.47793	8.65985e-08	1.86204e-06
YLR406C	1.47493	3.62153e-11	2.11243e-09
YDL208W	1.47414	3.81931e-08	9.26605e-07
YIL050W	1.47047	2.53437e-08	6.46323e-07
YKR057W	1.46394	5.42759e-08	1.23998e-06
YOR122C	1.45662	7.1745e-10	2.89248e-08
YNL162W	1.43565	2.79318e-07	5.28103e-06
YDR513W	1.43564	6.91275e-09	2.05992e-07
YJR094W-A	1.43446	1.07771e-07	2.27272e-06
YHR141C	1.43048	5.42254e-07	9.12018e-06
YBR048W	1.43036	8.98e-08	1.91585e-06
YHR193C	1.42351	1.06489e-09	4.05473e-08
YDR252W	1.42291	0.000457333	0.00278618
YER034W	1.42265	1.24459e-05	0.000134864
YNL067W	1.42238	8.96705e-10	3.51188e-08
YDR239C	1.41948	1.22902e-05	0.000133764
YER126C	1.41595	8.80757e-06	9.97766e-05
YLL050C	1.41136	1.98245e-09	6.92344e-08
YOL149W	1.40972	6.49468e-07	1.05669e-05
YNL233W	1.4085	1.16078e-06	1.77185e-05
YLR441C	1.40752	1.09093e-11	7.38464e-10
YER087C-B	1.40735	1.03131e-06	1.59286e-05
YLR168C	1.40306	4.07305e-06	5.20571e-05
YDR139C	1.40155	4.42261e-05	0.000393977
YDL110C	1.39959	3.15664e-07	5.82756e-06
YGL231C	1.39653	8.65698e-08	1.86204e-06
YBR047W	1.39387	0.000491837	0.00294404
YFL030W	1.39265	0.000339309	0.00219132
YGR271C-A	1.39165	0.00143108	0.00716364
YMR311C	1.38976	2.29165e-06	3.20539e-05
YNL111C	1.38939	1.31348e-05	0.00014066
YCL057C-A	1.38932	2.76144e-06	3.76901e-05
YGR118W	1.38525	2.6342e-10	1.26696e-08
YLR395C	1.38236	4.89094e-07	8.43303e-06
YPR098C	1.38143	5.27197e-07	8.89422e-06
YLR185W	1.37795	4.44704e-08	1.04201e-06
YIL116W	1.37185	7.42433e-08	1.64808e-06
YER053C-A	1.36695	6.26187e-05	0.000536358
YDR086C	1.36586	5.68331e-10	2.36072e-08
YCR083W	1.36245	2.19921e-05	0.000216098
YFR049W	1.35871	2.24983e-05	0.000220677
YNL308C	1.35765	2.89212e-07	5.44931e-06
YBR085C-A	1.35747	1.36026e-06	2.01575e-05
YOR047C	1.35469	1.11491e-06	1.71233e-05
YHR052W	1.35464	1.38488e-05	0.000146589
YLR142W	1.35331	0.00206705	0.00963745
YLR388W	1.35039	5.80871e-05	0.000503147
YCR021C	1.34957	0.00420936	0.0171216
YPR043W	1.34814	9.79434e-07	1.52131e-05
YKR083C	1.34652	0.00139694	0.00702797
YOR293W	1.34459	1.16661e-10	6.03447e-09
YHR146W	1.34438	5.3669e-10	2.26359e-08
YKL075C	1.34425	2.4811e-06	3.44402e-05
YNL147W	1.34034	4.59841e-07	8.02965e-06
YEL039C	1.33987	0.000529379	0.00312442
YEL048C	1.33917	0.000267028	0.00180979
YNL079C	1.33827	7.85947e-09	2.31685e-07
YDR533C	1.33104	4.30597e-07	7.61034e-06
YDR529C	1.3268	8.3376e-09	2.43165e-07
YOL140W	1.32554	1.43322e-06	2.09556e-05
YER102W	1.32256	5.12471e-08	1.18062e-06
YGL032C	1.3222	1.42188e-06	2.08454e-05
YKL007W	1.31891	2.09544e-09	7.22598e-08
YDL166C	1.31541	1.01611e-05	0.000113933
YPR187W	1.31468	9.84994e-06	0.000110671
YBR258C	1.31179	0.00114932	0.00599147
YDL130W	1.3111	0.000246348	0.00169264
YPL249C-A	1.30769	1.54663e-08	4.2614e-07
YGL194C-A	1.30642	0.00146947	0.0073047
YDR070C	1.3063	0.00033492	0.00216949
YNR058W	1.30539	0.0064127	0.0239842
YCR028C-A	1.30014	7.98821e-07	1.26955e-05
YER074W-A	1.30005	5.62111e-07	9.3965e-06
YLR152C	1.29616	0.00016157	0.00119715
YPL158C	1.29483	4.0612e-07	7.22972e-06
YLR038C	1.29451	7.22825e-07	1.15885e-05
YBR194W	1.29434	0.00164959	0.00803447
YDR121W	1.28949	7.7963e-05	0.000641848
YML041C	1.28535	7.4599e-06	8.64749e-05
YBR233W-A	1.2792	0.0012601	0.00647529
YMR256C	1.27845	8.80763e-05	0.000711961
YOR382W	1.27704	0.0028244	0.0124387
YBL002W	1.27235	3.08847e-07	5.72097e-06
YBR256C	1.27105	1.50401e-08	4.2074e-07
YLR306W	1.26928	0.00185017	0.00879832
YGL121C	1.26883	0.00112645	0.00591034
YKR060W	1.26652	0.000384645	0.00241859
YDL043C	1.26385	4.97665e-05	0.000437993
YOL127W	1.26224	2.56826e-08	6.51934e-07
YDL061C	1.26089	2.36671e-08	6.12108e-07
YDR171W	1.25982	8.26527e-06	9.40217e-05
YPR010C-A	1.25904	0.00023171	0.00160615
YDL192W	1.2581	6.24317e-08	1.40292e-06
YOR279C	1.25406	0.000317829	0.00209202
YKL186C	1.24182	2.54807e-06	3.51032e-05
YDL004W	1.23886	2.37532e-05	0.00023092
YJL053W	1.23838	4.98346e-07	8.51224e-06
YBR290W	1.23777	4.11737e-06	5.23921e-05
YHL002W	1.23722	6.34006e-07	1.03769e-05
YOR006C	1.23608	1.53961e-06	2.22736e-05
YPR133W-A	1.23589	1.88997e-05	0.000192974
YIL018W	1.23448	4.03987e-07	7.21517e-06
YGR027C	1.23431	2.46932e-08	6.32677e-07
YBL072C	1.23404	2.26017e-07	4.4259e-06
YBL026W	1.23358	2.77516e-05	0.000263939
YFL017W-A	1.23318	0.00040801	0.00252782
YCR020C-A	1.23301	0.000172918	0.00125911
YIL008W	1.23251	0.000166937	0.00122861
YJL151C	1.23092	1.48021e-05	0.000155181
YPR149W	1.22951	4.67547e-06	5.81306e-05
YLR344W	1.22866	3.88682e-07	7.01034e-06
YPL004C	1.22853	2.28366e-09	7.77721e-08
YML025C	1.22345	7.03189e-06	8.23843e-05
YML028W	1.22277	9.16957e-07	1.44059e-05
YML108W	1.22054	0.00324946	0.0139849
YPL146C	1.21876	0.000162649	0.00120189
YOL113W	1.21748	3.47539e-05	0.000320801
YPL037C	1.21747	8.83827e-07	1.39254e-05
YML063W	1.21676	9.46057e-10	3.67889e-08
YER042W	1.21558	1.52131e-05	0.000158581
YDR493W	1.21496	0.000275059	0.00185504
YMR193W	1.21373	0.000211012	0.0014814
YGR063C	1.21224	3.25113e-06	4.29541e-05
YDR500C	1.21219	2.52715e-09	8.44902e-08
YKL061W	1.2121	0.00167835	0.00814373
YPL225W	1.20898	0.000105826	0.000843376
YLR109W	1.2084	4.3089e-05	0.000385411
YGR243W	1.2075	0.000851167	0.00467162
YJL173C	1.20635	2.90615e-06	3.92473e-05
YER071C	1.20589	0.0051914	0.0202935
YJL144W	1.20463	0.0022013	0.0101256
YDR178W	1.20425	1.44265e-06	2.10374e-05
YML094W	1.20285	0.000121572	0.000946844
YMR299C	1.20201	0.00197666	0.00929503
YOR298C-A	1.19979	8.25528e-06	9.40217e-05
YHR162W	1.19903	4.43393e-06	5.56322e-05
YIL010W	1.19578	1.05591e-05	0.000117914
YNL166C	1.19533	7.76191e-06	8.94088e-05
YDR378C	1.19419	1.72279e-05	0.000178564
YHR005C-A	1.1941	5.14794e-06	6.32874e-05
YNL244C	1.19386	5.07886e-06	6.25784e-05
YDR306C	1.19378	1.38326e-05	0.000146589
YFR031C-A	1.1919	1.21425e-06	1.83915e-05
YBR230W-A	1.19134	0.00600135	0.0226777
YPR020W	1.19126	3.56145e-05	0.000328192
YNL113W	1.18796	1.04082e-05	0.000116466
YDL157C	1.18769	0.000592915	0.00344016
YOL133W	1.18675	2.06791e-06	2.90726e-05
YDL082W	1.18272	3.48514e-07	6.39099e-06
YLR333C	1.18052	1.03597e-06	1.59557e-05
YMR194W	1.18032	5.31935e-06	6.51026e-05
YDL135C	1.17666	2.14263e-05	0.000211921
YNL024C-A	1.17609	0.000170238	0.00124623
YER146W	1.17502	4.1662e-05	0.000373867
YMR038C	1.17459	1.35806e-06	2.01575e-05
YHR097C	1.17419	2.00479e-05	0.000201693
YJR025C	1.1737	4.80668e-06	5.94921e-05
YDL065C	1.17323	6.21708e-06	7.41874e-05
YBL078C	1.17257	0.00017024	0.00124623
YIL169C	1.1673	0.000308558	0.00204326
YHR208W	1.16495	1.99707e-06	2.8149e-05
YBR153W	1.16441	0.000341229	0.00219569
YKR023W	1.16233	8.20463e-05	0.00066844
YNR009W	1.16006	0.000127695	0.000983361
YIL052C	1.15934	2.55413e-05	0.000246555
YDR225W	1.15888	2.42692e-07	4.71873e-06
YDR276C	1.15866	1.96926e-05	0.000199215
YKL041W	1.15786	3.1579e-05	0.000293969
YPL108W	1.15612	0.00341458	0.0145228
YMR112C	1.15604	0.000668103	0.00381187
YGR081C	1.15588	4.14116e-05	0.000372229
YIL007C	1.15567	8.01689e-05	0.000656069
YMR197C	1.15534	0.000106258	0.000844998
YPL127C	1.15275	5.81261e-06	7.03091e-05
YGR058W	1.15002	0.000484787	0.00291138
YDR019C	1.14992	3.74989e-06	4.90708e-05
YBL092W	1.14963	1.14405e-07	2.40338e-06
YKL016C	1.14963	6.12781e-07	1.01201e-05
YLL009C	1.14962	0.00207501	0.00966632
YER037W	1.14937	1.09268e-05	0.000121279
YKL122C	1.14785	0.000138942	0.00105034
YKR042W	1.14722	0.000239934	0.00165688
YJR100C	1.14458	7.28826e-05	0.000606396
YLR448W	1.14434	1.5587e-07	3.20089e-06
YOR193W	1.14228	0.000991724	0.00533623
YBR282W	1.14151	0.000404204	0.00251561
YOR020C	1.14149	0.000394989	0.00248078
YGR129W	1.13869	0.00816999	0.0292212
YNL070W	1.13847	0.0017767	0.00850057
YJL203W	1.13836	0.00016806	0.00123357
YNL096C	1.13783	6.07451e-08	1.37064e-06
YDR258C	1.13708	1.43731e-05	0.000150972
YMR070W	1.13523	0.000292747	0.00195748
YPL078C	1.13457	6.8145e-07	1.09894e-05
YMR286W	1.13412	0.0140629	0.0454638
YNL302C	1.13215	1.16658e-06	1.77185e-05
YBR244W	1.13152	3.98122e-05	0.000359622
YBL031W	1.12871	0.01039	0.0356275
YDR429C	1.12857	4.25549e-06	5.37624e-05
YOR312C	1.12791	5.0094e-07	8.52999e-06
YKL138C-A	1.12629	0.0050296	0.0198255
YHR090C	1.12529	0.000701645	0.0039743
YPL135W	1.12498	0.000471021	0.00285687
YGR222W	1.12412	6.54078e-05	0.000555157
YGL103W	1.12323	3.77391e-05	0.000344298
YGR248W	1.12301	1.18071e-05	0.000129737
YKL167C	1.12266	0.000120697	0.000942706
YPL179W	1.12222	5.18627e-06	6.36159e-05
YBR111W-A	1.12207	0.00396984	0.0163413
YER035W	1.1219	0.00029806	0.00198092
YOR264W	1.1206	2.53667e-06	3.50342e-05
YBR095C	1.11907	1.23915e-05	0.00013454
YAR035W	1.11752	0.0123024	0.0406594
YGR214W	1.11697	3.93543e-06	5.08915e-05
YEL012W	1.11685	6.70419e-05	0.000566396
YNL078W	1.11675	3.05598e-05	0.000285451
YDR485C	1.11374	3.99976e-05	0.000360702
YLR107W	1.11216	1.79126e-05	0.000183923
YOR232W	1.11189	1.25076e-05	0.000135264
YOL039W	1.11161	3.77662e-06	4.93028e-05
YLR408C	1.11071	0.0054866	0.0211754
YHL033C	1.10849	3.97586e-06	5.11729e-05
YKL138C	1.1055	0.003905	0.0160986
YNL252C	1.104	0.000128508	0.0009843
YGL030W	1.10338	2.58267e-05	0.000248871
YLR042C	1.10069	0.000587187	0.00341054
YGL221C	1.10038	4.35006e-06	5.48308e-05
YOR004W	1.10014	0.001244	0.00641662
YBR089C-A	1.09958	0.000197397	0.00140205
YGL029W	1.09936	0.00875847	0.0309225
YLR048W	1.09928	6.7909e-06	7.99024e-05
YKL204W	1.09719	0.000184253	0.00132354
YGL087C	1.09602	6.43389e-05	0.00054693
YIL065C	1.09464	0.000122717	0.000954404
YDR077W	1.09352	0.00174081	0.00838004
YER079W	1.09154	0.0011553	0.00601565
YNR007C	1.08765	0.0005174	0.00306721
YOR046C	1.08749	8.07194e-06	9.25909e-05
YOR281C	1.08743	0.000115017	0.000906092
YKL049C	1.08658	0.00573916	0.0218831
YIR017C	1.08656	0.00524992	0.020431
YBL071W-A	1.08298	0.00882144	0.0311248
YIR037W	1.08282	1.60938e-05	0.000167126
YOR265W	1.08225	0.00160834	0.0078737
YJL191W	1.08199	7.12881e-05	0.000595842
YER059W	1.07996	8.70405e-05	0.000705981
YPL077C	1.0793	0.00412457	0.0168895
YER013W	1.07726	1.14634e-05	0.000126467
YIL063C	1.07716	0.000380029	0.00239231
YPR132W	1.07699	6.46979e-07	1.05577e-05
YBR269C	1.07697	0.000556519	0.00325309
YML009C	1.07645	0.0004724	0.0028589
YGR076C	1.07589	0.00381129	0.0158313
YKL053C-A	1.07376	0.000562074	0.00328205
YDR451C	1.07264	0.000125595	0.000972649
YBR181C	1.0712	0.000133385	0.00101576
YEL041W	1.07082	0.00568738	0.0217613
YPL090C	1.06819	0.000134682	0.0010228
YFR004W	1.06643	2.77635e-06	3.77736e-05
YDR453C	1.06632	0.000248857	0.00170774
YGR279C	1.06448	0.000205413	0.00144766
YLR301W	1.0618	3.211e-06	4.27328e-05
YOL008W	1.0612	0.000488745	0.00293194
YFR001W	1.05868	0.0029292	0.0128384
YGR029W	1.05807	0.000121543	0.000946844
YAR002W	1.05714	8.42779e-05	0.000685602
YDR168W	1.05612	3.64235e-05	0.000334471
YPR094W	1.05472	0.00290432	0.0127599
YDR363W-A	1.05421	6.21551e-05	0.000533328
YBR255C-A	1.0525	0.00725277	0.0266535
YGL209W	1.04633	0.000364741	0.00231199
YER012W	1.04328	1.75828e-05	0.000181557
YKL183W	1.03976	0.00255471	0.0114347
YFL013C	1.03973	2.1755e-05	0.000214537
YLL026W	1.03931	6.29332e-06	7.4851e-05
YDL106C	1.03763	5.1061e-05	0.000447232
YNL289W	1.03612	5.37278e-05	0.000467603
YNL036W	1.03557	0.000887088	0.00483971
YKL056C	1.0355	0.000255729	0.00174398
YKL063C	1.0335	0.000365454	0.00231384
YCR012W	1.03252	0.00105417	0.00561714
YBR046C	1.03236	2.97312e-05	0.000279166
YGL244W	1.03197	1.40636e-05	0.00014829
YDR063W	1.03165	1.99876e-05	0.000201693
YFR011C	1.031	0.000410158	0.00253539
YPR056W	1.03081	0.000221673	0.00154635
YLR074C	1.03072	0.000355097	0.00225347
YLR254C	1.02914	0.00548019	0.0211754
YGL232W	1.02839	0.000848878	0.0046684
YPR145W	1.02833	2.79252e-06	3.78995e-05
YHR087W	1.02797	5.40053e-06	6.5949e-05
YPL052W	1.02603	0.011365	0.038244
YCL059C	1.026	0.000405404	0.00252021
YMR271C	1.0255	0.00731743	0.0267834
YPR133C	1.02336	2.93494e-05	0.000276975
YPR143W	1.02324	0.00544187	0.0210868
YLR361C-A	1.02271	0.00364515	0.0152523
YOR226C	1.02169	0.000166761	0.00122861
YBR154C	1.02087	6.56936e-05	0.000556403
YBR249C	1.02087	1.39768e-06	2.05455e-05
YBL038W	1.02003	0.000335393	0.00216949
YMR260C	1.01884	0.000343618	0.00220616
YJR014W	1.01677	1.22956e-05	0.000133764
YPR167C	1.01646	0.0035677	0.0150013
YBL003C	1.01397	5.60301e-06	6.81182e-05
YKR046C	1.01362	0.00796132	0.0286282
YLR260W	1.01333	0.000353475	0.00224892
YDL200C	1.01326	0.00923709	0.0324018
YGL010W	1.01323	0.00112371	0.00590161
YER062C	1.01242	6.93418e-05	0.000582237
YDR461C-A	1.01211	0.00644995	0.0241071
YKR080W	1.01151	1.35309e-05	0.000144339
YAL035W	1.00951	2.63266e-05	0.000252358
YOR239W	1.00869	0.000238714	0.00165053
YJR130C	1.00843	0.00169486	0.00820204
YNL300W	1.00729	0.00352383	0.0148624
YDR314C	1.00726	0.00523965	0.020431
YNL050C	1.00713	0.00241663	0.0109689
YBR289W	1.00654	0.000229203	0.00159078
YPL014W	1.00432	0.000347787	0.00222771
YKL103C	1.00404	4.13068e-05	0.000371897
YOR357C	1.00375	0.00122074	0.00631443
YGL096W	1.00302	0.0133562	0.0433838
YBR088C	1.00204	0.00011732	0.000921583
YDR002W	1.00071	1.87335e-05	0.000191634
YBR082C	1.00037	9.70621e-06	0.000109504
YDR227W	0.998814	0.000415975	0.00255981
YML030W	0.996812	0.00140099	0.00703444
YGL106W	0.996432	2.33385e-05	0.000227291
YIL138C	0.993866	0.00220834	0.0101495
YGR146C	0.993504	0.0102761	0.0353475
YGL044C	0.99345	0.000187622	0.00134299
YHR072W-A	0.992534	0.00655959	0.0244341
YJL011C	0.990968	0.0116102	0.0388638
YLR293C	0.990526	0.000422823	0.00259612
YDR055W	0.990403	0.000278257	0.0018743
YPR008W	0.990218	0.000566437	0.00330402
YML026C	0.988535	1.33897e-06	1.99499e-05
YER057C	0.988319	1.3929e-05	0.000147154
YAL034W-A	0.98821	0.0106154	0.0362191
YML071C	0.988184	9.61555e-05	0.000774186
YGR078C	0.987945	7.37002e-05	0.00061227
YDR299W	0.987708	0.0017494	0.00840376
YDR382W	0.986236	0.00472852	0.0188556
YOR091W	0.98556	8.12941e-05	0.000664286
YPL107W	0.985139	0.00202751	0.00948537
YCR009C	0.984597	1.31943e-05	0.000141022
YOR185C	0.98087	5.13223e-05	0.00044822
YDR309C	0.980706	0.000197446	0.00140205
YOR157C	0.980272	3.92661e-05	0.000355861
YBR231C	0.98014	0.00205407	0.00959323
YNL084C	0.978814	0.000335052	0.00216949
YMR227C	0.977122	0.00191634	0.00905801
YEL054C	0.97634	1.51326e-05	0.000158042
YML027W	0.97497	0.00104027	0.00555764
YLR094C	0.974332	0.000637843	0.00366209
YER130C	0.972609	0.000270839	0.00183108
YDL233W	0.971028	0.000767915	0.00428766
YBR054W	0.96932	0.000214013	0.00149864
YOL121C	0.968129	1.96834e-05	0.000199215
YPL228W	0.967034	0.000134229	0.00102078
YER064C	0.965327	7.55682e-05	0.000624948
YDL021W	0.963824	0.000493192	0.00294847
YLL027W	0.963066	4.42622e-05	0.000393977
YBL001C	0.957719	1.96318e-05	0.000199215
YJL124C	0.956512	0.000504164	0.00300144
YGR282C	0.955312	0.000540421	0.00317932
YPL260W	0.954454	3.74395e-05	0.000342135
YKL218C	0.95334	0.00114956	0.00599147
YPL079W	0.953056	1.21897e-05	0.000133139
YLR022C	0.952122	0.000575479	0.00335319
YOR189W	0.95207	0.0138445	0.0448904
YDR478W	0.951717	0.0156595	0.0496306
YER150W	0.951246	0.00225182	0.010332
YPL183W-A	0.950738	0.00519226	0.0202935
YGR111W	0.948835	6.14919e-05	0.000528464
YOR303W	0.94797	0.00111895	0.00588229
YDR167W	0.947321	0.00120642	0.00625807
YLR147C	0.945985	0.00437976	0.0177227
YLR216C	0.945955	0.000539228	0.00317571
YDR471W	0.945919	0.000506998	0.00301178
YBR182C	0.945269	0.00555198	0.0213774
YGL133W	0.944831	9.98047e-05	0.000798874
YGR208W	0.943861	0.000194143	0.00138753
YDR181C	0.943025	0.00593925	0.0224896
YGL031C	0.942921	0.000471983	0.0028589
YHR147C	0.942503	0.000925004	0.00503097
YBL059C-A	0.942478	0.0103709	0.0355942
YNL208W	0.941531	0.00591598	0.022417
YNL260C	0.940615	0.00487717	0.0193499
YOR113W	0.938985	0.00164848	0.00803447
YMR242C	0.938504	2.84187e-05	0.000268655
YHL034C	0.938422	0.000271777	0.00183516
YLR298C	0.935905	0.00232302	0.0106054
YML129C	0.934574	0.00446286	0.0179793
YGR268C	0.931726	0.00674406	0.0250187
YDR418W	0.929258	3.00752e-05	0.000281884
YHL001W	0.928101	0.000261896	0.0017794
YKR029C	0.926976	0.0014023	0.00703459
YLL045C	0.926005	2.48602e-05	0.000240828
YOL135C	0.925844	0.0019994	0.00937787
YDR067C	0.925805	0.00419814	0.0170971
YNL002C	0.924722	0.00337944	0.0144321
YOL068C	0.923532	0.000685159	0.00389783
YOL067C	0.92239	0.00664338	0.0246619
YER162C	0.922156	0.000299767	0.00198986
YAL055W	0.922011	0.0124095	0.0409394
YGL028C	0.920792	0.000414681	0.00255471
YMR183C	0.919316	0.000196599	0.00139994
YOR385W	0.918148	0.000293792	0.00195969
YML105C	0.916934	0.00011276	0.000889584
YKR077W	0.915847	0.00471614	0.0188199
YEL024W	0.91576	8.19788e-05	0.00066844
YER028C	0.914478	0.0125807	0.0414046
YLR126C	0.912301	0.00994377	0.0344648
YER067W	0.910155	0.00126605	0.00649091
YER159C	0.908233	0.000407486	0.00252743
YNL322C	0.907183	0.00801044	0.0287631
YCL035C	0.905423	0.000180934	0.00130879
YNL160W	0.904462	0.000206818	0.00145569
YIL136W	0.903022	6.27039e-05	0.000536358
YER143W	0.90201	0.000286809	0.00192482
YPL189C-A	0.901798	0.0120447	0.0400249
YJL138C	0.90123	6.46637e-06	7.67427e-05
YLR275W	0.901089	0.0126998	0.0416715
YIL127C	0.90069	0.0101609	0.0350171
YGR009C	0.900234	0.00133432	0.00677513
YDR050C	0.90015	0.000184108	0.00132354
YMR108W	0.899736	0.000135705	0.00102914
YKR059W	0.899559	6.63612e-06	7.84178e-05
YLR369W	0.897353	0.000207841	0.00146102
YBL095W	0.897096	0.00508198	0.0199871
YLR285W	0.896872	0.000836399	0.0046183
YGL011C	0.896742	0.000115722	0.000910338
YMR255W	0.896366	0.00778005	0.02812
YOR286W	0.894006	0.00460567	0.0184867
YML068W	0.89071	0.00868877	0.030716
YGR083C	0.890222	0.00026189	0.0017794
YLR183C	0.888521	0.00161766	0.00790518
YGR034W	0.886921	0.000182162	0.00131593
YLL024C	0.886802	0.00188381	0.00891961
YLR435W	0.886553	0.00305179	0.0132907
YIR024C	0.886203	0.00849366	0.0301039
YDL022W	0.884615	0.00121343	0.00628254
YMR298W	0.882786	0.000241411	0.00166289
YDR059C	0.882728	0.00319356	0.0137795
YDR071C	0.88151	0.000459947	0.00279589
YBR156C	0.881442	0.0127655	0.0418189
YML015C	0.880742	0.00247117	0.011133
YMR225C	0.880611	0.0057979	0.0220304
YJR007W	0.879111	7.76777e-05	0.000640461
YLR082C	0.877716	0.00507454	0.0199739
YKL119C	0.877664	0.00173742	0.00838004
YLR221C	0.876226	0.000748352	0.00420411
YER048C	0.875507	0.000597677	0.00346413
YPL253C	0.874692	0.00815324	0.0291803
YGR189C	0.874467	0.00413611	0.0169241
YJL181W	0.874273	0.00353915	0.0149041
YPR165W	0.873877	0.000171635	0.00125255
YKL164C	0.872568	0.00435383	0.0176307
YLR075W	0.872023	0.00011784	0.000924347
YDL064W	0.870033	0.000925816	0.00503097
YLR193C	0.869484	0.00185924	0.00882855
YBR109C	0.869048	0.00146678	0.00729795
YJL200C	0.869	0.000174845	0.00126809
YBR084C-A	0.868912	0.000860744	0.00471004
YML131W	0.868205	0.0021775	0.010033
YPL064C	0.867908	0.0117525	0.0391963
YNR022C	0.867438	0.00662532	0.0246115
YCL004W	0.866816	0.0058115	0.0220668
YDR117C	0.866369	0.00177193	0.00848515
YER051W	0.865818	0.00314891	0.0136271
YMR068W	0.865166	0.0100391	0.0347065
YHR121W	0.86384	0.00332069	0.0142134
YPL232W	0.863338	0.000334202	0.00216949
YCR065W	0.863252	0.00322797	0.0139034
YNL107W	0.862964	0.00442004	0.0178462
YNL222W	0.862735	0.0046439	0.0185858
YKL074C	0.861035	0.00315752	0.0136535
YDL213C	0.860688	0.0129727	0.0423136
YLR058C	0.860532	0.00133575	0.00677513
YMR072W	0.86041	0.00273662	0.0121007
YGR207C	0.860173	0.000745908	0.00419468
YCL047C	0.858948	0.00544583	0.0210872
YPL038W	0.858637	0.0109177	0.0370584
YBL009W	0.857595	0.00264296	0.0117625
YER007C-A	0.856417	0.000351761	0.00224268
YGR037C	0.855806	0.00358097	0.0150456
YGL219C	0.855238	0.000624541	0.00359324
YNR026C	0.853728	0.000586859	0.00341054
YNL274C	0.85369	0.000721383	0.00407347
YIL045W	0.851725	0.00661089	0.0245913
YLR018C	0.851411	0.000950208	0.00515331
YLR268W	0.851189	0.000349472	0.00223585
YNL175C	0.85081	0.00264977	0.0117832
YHR143W-A	0.85037	0.00239554	0.0109002
YKR001C	0.850277	2.97343e-05	0.000279166
YCL064C	0.849768	0.00349775	0.0147752
YOR369C	0.847235	0.00416188	0.0169731
YDR473C	0.84692	0.00819174	0.0292799
YDR100W	0.846635	0.00164998	0.00803447
YNL007C	0.846277	0.000322817	0.00211607
YJL165C	0.845695	0.000194351	0.00138753
YPR053C	0.845326	0.001168	0.00606453
YGL191W	0.844895	0.000323797	0.00211859
YDR191W	0.844376	0.00840108	0.0298723
YBR016W	0.844164	0.0102178	0.0351688
YLR025W	0.842853	0.0015302	0.00752472
YPL198W	0.842072	0.000372932	0.00235303
YGL098W	0.842034	0.00783019	0.0282382
YGL041W-A	0.841085	0.00748986	0.0272327
YHR088W	0.840975	0.00601581	0.0227167
YLR045C	0.840034	0.000814492	0.00451553
YGR280C	0.838881	0.00491397	0.0194818
YJL006C	0.838617	0.00636842	0.0238349
YJR083C	0.838103	0.0155997	0.0495557
YPL013C	0.837987	0.00283771	0.0124873
YPL175W	0.837758	0.0131171	0.0426325
YPR103W	0.836744	0.000203111	0.00143393
YMR195W	0.835444	0.000865524	0.00473147
YNL129W	0.834293	0.00160764	0.0078737
YEL034W	0.833632	0.00124773	0.00642393
YGR165W	0.833628	0.00382309	0.0158563
YIR004W	0.833321	0.00113951	0.00595608
YDR328C	0.831743	0.000546905	0.00321189
YPR017C	0.829679	0.00767211	0.0277481
YFR010W	0.828875	0.000162496	0.00120189
YOL041C	0.827965	0.0034173	0.0145228
YHR179W	0.827871	0.00564554	0.0216163
YIL078W	0.827234	0.000101314	0.00080977
YER030W	0.824802	0.0143408	0.0461717
YPL206C	0.824674	0.00139821	0.00702797
YJR074W	0.82447	0.00655973	0.0244341
YFL005W	0.822829	0.000479849	0.00288488
YGL066W	0.822658	0.00302272	0.0131955
YDR305C	0.821429	0.00573293	0.0218745
YMR024W	0.821109	0.00345805	0.0146526
YNL131W	0.820993	0.00034018	0.00219436
YNR054C	0.819552	0.0112209	0.0379077
YCR031C	0.818005	0.00330599	0.0141726
YDR339C	0.817677	0.00383492	0.0158933
YDL092W	0.817456	0.0103227	0.0354854
YBR137W	0.816633	0.00344247	0.0145979
YIL003W	0.816034	0.00416355	0.0169731
YJR104C	0.815298	0.00611402	0.0230241
YML069W	0.814597	0.000854721	0.00468175
YHR061C	0.814494	0.0125291	0.0412596
YPR180W	0.814477	0.00191993	0.00906718
YGR065C	0.814427	0.00108562	0.00573452
YKL042W	0.813473	0.00814656	0.0291754
YHR077C	0.808877	0.0041626	0.0169731
YDL078C	0.808034	0.000367091	0.00231885
YMR142C	0.807421	0.000422687	0.00259612
YGR085C	0.806953	0.000160828	0.00119488
YOR184W	0.80641	0.000297417	0.00197905
YKL085W	0.806369	0.0018748	0.00889231
YDR058C	0.804902	0.0125265	0.0412596
YNL231C	0.804444	0.00104098	0.00555764
YPL099C	0.803225	0.0112926	0.0381028
YDL148C	0.80301	0.00558816	0.0214715
YOR096W	0.80285	0.00062588	0.00359717
YLR135W	0.802358	0.015631	0.0495976
YNR036C	0.800955	0.00439943	0.0177761
YEL001C	0.800694	0.000311486	0.00206017
YPL210C	0.800653	0.00215967	0.00998207
YMR267W	0.799929	0.00468682	0.0187302
YIL053W	0.798918	0.00617266	0.0231813
YPR107C	0.797384	0.0129108	0.0421652
YOR128C	0.797321	0.000315748	0.00208082
YGL080W	0.797312	0.00204149	0.0095426
YIR001C	0.797028	0.0139493	0.0451501
YMR062C	0.796714	0.00137761	0.0069611
YOR117W	0.794197	0.000331657	0.00215971
YOR027W	0.793426	0.0016427	0.0080204
YLL023C	0.792927	0.00127549	0.00652669
YGR196C	0.792483	0.00427278	0.017341
YBL087C	0.791444	0.00084253	0.00464748
YDL097C	0.791372	0.000475006	0.00286835
YDR023W	0.791166	0.000340735	0.00219536
YJL008C	0.79095	0.00500359	0.0197656
YOL040C	0.788993	0.00338929	0.0144553
YGL048C	0.788461	0.000203203	0.00143393
YOL111C	0.788143	0.0056978	0.0217708
YMR285C	0.787709	0.00209226	0.00969724
YKL006W	0.787472	0.00151431	0.00748687
YFR050C	0.787341	0.00097472	0.00525505
YJR145C	0.787255	0.00329554	0.0141499
YGL064C	0.787144	0.00824113	0.0294372
YDL181W	0.787099	0.0130242	0.0424371
YKL139W	0.7867	0.00361674	0.0151591
YOR280C	0.786553	0.00695054	0.0256805
YIL112W	0.786286	0.00177095	0.00848515
YOR164C	0.786133	0.00247309	0.011133
YKR085C	0.783671	0.00368741	0.0153867
YIR021W	0.783372	0.0122013	0.0404227
YBR173C	0.783121	0.0108982	0.0370227
YBR035C	0.782914	0.0013248	0.00675083
YHR060W	0.781551	0.00711352	0.0262287
YGR105W	0.781144	0.0131137	0.0426325
YAL005C	0.780297	0.00611018	0.0230241
YDR312W	0.78028	0.00443968	0.0178991
YFL038C	0.779497	0.00143703	0.00718253
YDR512C	0.778978	0.00461351	0.0185017
YCL050C	0.77773	0.000283019	0.00190171
YER117W	0.77383	0.00183771	0.00874669
YOL018C	0.77263	0.0063258	0.0236915
YPR035W	0.772338	0.00299017	0.0130638
YIR011C	0.772221	0.00296692	0.0129775
YOR337W	0.772139	0.00176279	0.00845613
YDR464W	0.771268	0.0128106	0.0419098
YOR147W	0.771073	0.00508998	0.0199871
YPL188W	0.769422	0.000797322	0.00443829
YNL157W	0.767981	0.0116346	0.038898
YOL151W	0.767864	0.00355114	0.0149431
YJR091C	0.767818	0.0127676	0.0418189
YDR056C	0.767403	0.00150728	0.00745886
YPL212C	0.766783	0.00147901	0.00733884
YHR049W	0.76505	0.00732877	0.0267891
YKR062W	0.764251	0.00290112	0.0127561
YLR223C	0.763655	0.00340016	0.0144857
YOL059W	0.763464	0.0114886	0.0385509
YBR083W	0.762055	0.0130415	0.0424371
YMR031C	0.760452	0.00525029	0.020431
YDR356W	0.759995	0.0106479	0.0363074
YBL041W	0.759917	0.00153374	0.00753537
YGR008C	0.757065	0.0155499	0.0495372
YML116W	0.75458	0.0106813	0.0363989
YIL133C	0.753649	0.00346551	0.0146729
YJL097W	0.753301	0.00179527	0.00856805
YPL026C	0.752058	0.0113083	0.038109
YOR253W	0.749569	0.00924245	0.0324018
YOR374W	0.746731	0.00778855	0.0281322
YKL170W	0.746622	0.0122195	0.0404586
YPL271W	0.746407	0.0140064	0.045308
YOL070C	0.745791	0.00427705	0.0173455
YGL076C	0.745491	0.00123806	0.00639199
YDR423C	0.744874	0.00546565	0.021149
YDL055C	0.7435	0.00179334	0.00856805
YPL059W	0.741897	0.00908523	0.0319527
YLR449W	0.740897	0.011176	0.0378025
YLR350W	0.740545	0.00384405	0.0159191
YKL193C	0.739871	0.00360369	0.0151179
YNL268W	0.739544	0.0051181	0.0200733
YML058W	0.739171	0.0127278	0.0417382
YJL065C	0.738274	0.0158022	0.0499461
YOR352W	0.738233	0.00890134	0.0313865
YOL147C	0.737657	0.00861242	0.0304657
YKL077W	0.73755	0.000506618	0.00301178
YCL055W	0.737287	0.00281526	0.0124084
YGR186W	0.73464	0.00542682	0.0210582
YOR204W	0.7345	0.00272749	0.0120701
YPR170W-B	0.734114	0.00179665	0.00856805
YBL099W	0.7338	0.00216494	0.0099919
YGL037C	0.730806	0.0010908	0.00575533
YDR304C	0.729889	0.00381795	0.015847
YOR065W	0.729418	0.00252989	0.0113421
YDR085C	0.726744	0.0113929	0.0382765
YMR263W	0.722686	0.0116532	0.0389239
YER055C	0.722445	0.00152155	0.00750177
YLR355C	0.720699	0.00723677	0.0266382
YNL064C	0.720451	0.00275012	0.0121506
YHR037W	0.719971	0.0049965	0.0197656
YPL237W	0.718488	0.00228949	0.0104785
YML001W	0.717603	0.00305641	0.0133002
YAL015C	0.716558	0.0100709	0.0347943
YGR148C	0.714714	0.0144423	0.0464441
YJL060W	0.712542	0.00508698	0.0199871
YGL105W	0.711981	0.0017402	0.00838004
YBR111C	0.711673	0.00372907	0.0155296
YNL027W	0.71145	0.00659467	0.0245476
YLR043C	0.711325	0.0083715	0.0297892
YGR235C	0.710839	0.00496412	0.0196664
YOR036W	0.709711	0.0125281	0.0412596
YGR187C	0.709	0.00509247	0.0199871
YER009W	0.708656	0.00100448	0.00539428
YBL045C	0.707886	0.00202013	0.0094589
YDR098C	0.707202	0.00557835	0.0214639
YDL099W	0.707148	0.0101211	0.034902
YBL085W	0.706626	0.0105217	0.0359665
YLR367W	0.706142	0.00522396	0.0203967
YPL249C	0.703337	0.00759529	0.027543
YPR102C	0.703286	0.00129374	0.00660483
YOL126C	0.70312	0.00409337	0.0167868
YGR086C	0.702708	0.00209755	0.00970535
YMR186W	0.702707	0.00105946	0.00563983
YNL317W	0.698061	0.0145163	0.0466272
YHR005C	0.697917	0.00268418	0.0119073
YHR063C	0.697869	0.00727025	0.0266819
YMR295C	0.695671	0.00730512	0.0267829
YJL190C	0.695602	0.00101836	0.00545814
YJL112W	0.694901	0.0129173	0.0421652
YDL160C	0.692651	0.00296804	0.0129775
YEL046C	0.691871	0.0110242	0.0373582
YBR039W	0.691126	0.00126516	0.00649091
YDR226W	0.690743	0.00422488	0.0171593
YGR005C	0.690632	0.00364891	0.0152523
YBR104W	0.690077	0.00497339	0.0196889
YDR233C	0.687807	0.00748501	0.0272327
YDL178W	0.687402	0.0121364	0.0402565
YJL123C	0.686332	0.00517244	0.0202575
YER073W	0.686125	0.011062	0.03744
YIL106W	0.684747	0.011236	0.0379352
YJL020C	0.681557	0.00621028	0.0233066
YMR027W	0.680152	0.00149019	0.00738764
YOL038W	0.679782	0.00364966	0.0152523
YOR052C	0.677923	0.00544165	0.0210868
YOL120C	0.677764	0.00731715	0.0267834
YDR454C	0.676281	0.00762873	0.0276277
YDL225W	0.673918	0.0057938	0.0220304
YNL255C	0.670402	0.00159433	0.00781908
YLR201C	0.668739	0.00986346	0.0342531
YDR450W	0.666223	0.00128342	0.00655824
YGR278W	0.665776	0.0157884	0.0499461
YBR183W	0.665526	0.0110332	0.0373656
YKR016W	0.664742	0.00986426	0.0342531
YER124C	0.662671	0.0060704	0.0229071
YPL273W	0.66257	0.00554264	0.0213565
YEL027W	0.661291	0.00917114	0.0321929
YMR145C	0.657881	0.0105607	0.0360549
YHR065C	0.656172	0.0107946	0.0367162
YIL076W	0.655767	0.00478767	0.0190361
YBR078W	0.655594	0.0142055	0.0458438
YDL137W	0.65202	0.0100335	0.0347065
YNR011C	0.651769	0.014397	0.0463256
YBL064C	0.651169	0.00928599	0.0324714
YIL148W	0.649993	0.00272099	0.0120608
YHR094C	0.649561	0.00994405	0.0344648
YDR153C	0.649523	0.00548792	0.0211754
YAR015W	0.649197	0.00964289	0.0335908
YKL145W	0.645016	0.00245045	0.0110583
YLR321C	0.642785	0.00803693	0.0288393
YDR368W	0.639172	0.00616355	0.0231629
YMR083W	0.639169	0.0148378	0.0475145
YMR143W	0.634873	0.00179706	0.00856805
YOR163W	0.632189	0.0155577	0.0495372
YMR315W	0.631507	0.00833932	0.0297105
YJR016C	0.629124	0.0134186	0.0435609
YOL143C	0.629004	0.00756896	0.0274656
YER070W	0.62578	0.0149908	0.0478432
YGR167W	0.624315	0.00734982	0.0268303
YBR196C	0.621432	0.0118159	0.0393451
YGR175C	0.614469	0.0114853	0.0385509
YDR298C	0.614386	0.00854783	0.0302568
YPR004C	0.612195	0.0126909	0.0416671
YLR345W	0.611542	0.0153215	0.0488419
YBR169C	0.60895	0.00456367	0.0183361
YPR129W	0.608831	0.0120866	0.0401397
YPL220W	0.608039	0.0107307	0.0365444
YJR123W	0.602395	0.00890951	0.0313952
YMR099C	0.60211	0.0149797	0.0478354
YGR173W	0.60175	0.0143123	0.0461073
YOR276W	0.601262	0.00661899	0.0246047
YOR145C	0.599718	0.0115604	0.0387207
YMR049C	0.599531	0.00986097	0.0342531
YFL018C	0.59889	0.00371493	0.0154897
YNL016W	0.597334	0.00439515	0.0177718
YLR244C	0.596101	0.00910842	0.0320138
YHR001W	0.595372	0.0105003	0.0359384
YER026C	0.592886	0.00941863	0.0328932
YGL245W	0.592238	0.00752814	0.0273537
YNL134C	0.591718	0.0155867	0.0495432
YOR241W	0.590278	0.0115312	0.0386465
YDR148C	0.588748	0.00652113	0.0243399
YBL091C	0.586727	0.00594968	0.0225135
YGL082W	0.573386	0.0118914	0.0395393
YBR052C	0.567214	0.0156137	0.0495713
YOR323C	0.56211	0.00765464	0.0277032
YMR146C	0.558627	0.0129195	0.0421652
YBR025C	0.526741	0.0130348	0.0424371
YDL190C	-0.525114	0.0146485	0.0469872
YJL154C	-0.52627	0.0148671	0.0475312
YGR184C	-0.535772	0.0142904	0.0460637
YPR036W	-0.540292	0.0158046	0.0499461
YDL141W	-0.556375	0.0155839	0.0495432
YGL207W	-0.559859	0.00992018	0.0344255
YLR291C	-0.575696	0.0149355	0.0477221
YLR447C	-0.576808	0.0123581	0.0407944
YFL036W	-0.57984	0.0104287	0.0357379
YBR158W	-0.58265	0.0108605	0.0369175
YER086W	-0.595494	0.0113762	0.038244
YOR048C	-0.595621	0.00711805	0.0262287
YPR033C	-0.600231	0.00969341	0.0337454
YMR235C	-0.606927	0.00547446	0.0211682
YNL297C	-0.611267	0.010518	0.0359665
YOR171C	-0.611302	0.00844401	0.029983
YNL262W	-0.612308	0.0144801	0.0465382
YGR123C	-0.614589	0.0141147	0.0456045
YDR150W	-0.614901	0.0130345	0.0424371
YER017C	-0.616106	0.0121521	0.040284
YGL201C	-0.622819	0.00938462	0.0327953
YPL118W	-0.626667	0.0126554	0.0416006
YPL160W	-0.629928	0.00432463	0.0175254
YLR258W	-0.634176	0.0122565	0.0405565
YPL128C	-0.6351	0.00783055	0.0282382
YGR028W	-0.63734	0.014654	0.0469872
YDL128W	-0.644471	0.0148445	0.0475145
YJL094C	-0.646076	0.0122727	0.0405857
YDR057W	-0.650126	0.0113355	0.0381772
YLR100W	-0.652277	0.00723891	0.0266382
YOL016C	-0.653364	0.00916868	0.0321929
YER105C	-0.654931	0.00575154	0.021915
YNL035C	-0.655953	0.0118016	0.0393362
YDR294C	-0.659368	0.0104498	0.0357878
YDR293C	-0.659489	0.00730753	0.0267829
YLL006W	-0.659814	0.0099604	0.0344996
YPL214C	-0.660147	0.0113734	0.038244
YDR388W	-0.660192	0.00828067	0.0295399
YOL004W	-0.661742	0.0134483	0.0436314
YBR151W	-0.663779	0.0148629	0.0475312
YDR119W	-0.668886	0.00724455	0.0266411
YGL107C	-0.66967	0.00732595	0.0267891
YDR127W	-0.669801	0.00241195	0.0109658
YMR089C	-0.671946	0.00401207	0.0165028
YMR080C	-0.67202	0.00359793	0.0151053
YER166W	-0.673736	0.00524613	0.020431
YOR219C	-0.674546	0.012639	0.0415714
YPR063C	-0.675214	0.00403566	0.0165625
YLR386W	-0.677824	0.00572063	0.0218428
YKR048C	-0.678232	0.00681309	0.0252407
YOR142W	-0.679454	0.00308619	0.0134085
YHR132C	-0.682894	0.00467867	0.0187113
YJL082W	-0.684597	0.00897013	0.0315682
YGR200C	-0.687367	0.00272335	0.0120615
YLR078C	-0.687455	0.0146314	0.0469695
YDL145C	-0.688784	0.00236579	0.0107827
YKL073W	-0.690318	0.00461615	0.0185017
YIL083C	-0.692169	0.00785351	0.0282922
YPR113W	-0.692295	0.0123161	0.0406801
YAL041W	-0.695808	0.00261761	0.0116781
YKL157W	-0.696604	0.00107603	0.00570035
YER165W	-0.700949	0.00409931	0.0167986
YDR111C	-0.70098	0.0107686	0.0366508
YLL040C	-0.70173	0.0117179	0.039105
YHR082C	-0.702656	0.00262823	0.0117071
YOR320C	-0.704735	0.0126736	0.0416353
YFL028C	-0.7071	0.00683958	0.0253217
YNL329C	-0.708164	0.0047674	0.0189693
YMR162C	-0.710576	0.0118186	0.0393451
YKL008C	-0.710694	0.00379874	0.0157911
YGR261C	-0.713143	0.00275321	0.0121545
YPL207W	-0.713653	0.00259253	0.0115756
YGL003C	-0.714367	0.0148112	0.0474632
YGL114W	-0.717041	0.00239242	0.0108951
YMR088C	-0.721415	0.0109844	0.0372465
YJL196C	-0.721579	0.00696032	0.0256993
YDL058W	-0.721784	0.00252177	0.011315
YMR308C	-0.722248	0.000946108	0.00513615
YNL154C	-0.722738	0.00403433	0.0165625
YDR435C	-0.724274	0.0105495	0.0360393
YNR021W	-0.72464	0.00110735	0.00582688
YPR122W	-0.725128	0.0033904	0.0144553
YGR099W	-0.726115	0.0103738	0.0355942
YJR040W	-0.726345	0.00737056	0.0268881
YPL053C	-0.726982	0.0116316	0.038898
YOR231W	-0.728163	0.0138529	0.0448911
YPL176C	-0.728631	0.00241875	0.0109694
YHR149C	-0.728731	0.00502043	0.0198179
YKL121W	-0.730627	0.0118772	0.0395161
YIL022W	-0.733282	0.00500314	0.0197656
YFL007W	-0.733288	0.00152279	0.00750177
YOR270C	-0.735519	0.00230679	0.0105489
YHR099W	-0.735548	0.00218331	0.0100513
YOR326W	-0.737734	0.00103262	0.00552913
YJL186W	-0.738193	0.00182373	0.00868768
YDR472W	-0.738208	0.00531329	0.0206469
YMR247C	-0.740117	0.000600481	0.0034767
YDL143W	-0.741041	0.00247044	0.011133
YDR170C	-0.741329	0.00201165	0.00942724
YGR199W	-0.742139	0.00172764	0.00835218
YBR106W	-0.742552	0.00241505	0.0109689
YIL151C	-0.742839	0.00415293	0.0169676
YJR132W	-0.743352	0.00462769	0.0185344
YKR079C	-0.746503	0.00762031	0.0276154
YBR218C	-0.747503	0.00267246	0.0118745
YML072C	-0.7477	0.00420022	0.0170971
YLR305C	-0.748738	0.00167764	0.00814373
YJR051W	-0.749737	0.00341945	0.0145228
YJL076W	-0.750271	0.00527178	0.0205001
YNR027W	-0.750434	0.0138835	0.0449634
YKL014C	-0.750847	0.00256863	0.0114876
YML114C	-0.751037	0.0113018	0.038109
YHR112C	-0.754353	0.00569288	0.0217671
YGL036W	-0.754973	0.00613235	0.0230773
YDR231C	-0.755296	0.00796243	0.0286282
YOL145C	-0.755856	0.00387354	0.0160291
YGR141W	-0.755962	0.00373016	0.0155296
YOR108W	-0.756265	0.000478674	0.00288098
YGR252W	-0.756412	0.0142263	0.0458839
YOR227W	-0.758444	0.00627741	0.0235264
YJL109C	-0.758543	0.000685315	0.00389783
YOL076W	-0.75864	0.00208722	0.00969503
YER010C	-0.760996	0.0061468	0.0231159
YDL125C	-0.761743	0.00114508	0.00597948
YFR038W	-0.763106	0.00193582	0.00911863
YBR140C	-0.763883	0.00502745	0.0198255
YNL243W	-0.765011	0.00109601	0.00577272
YML038C	-0.767172	0.00945959	0.0329942
YGL211W	-0.769747	0.00791855	0.0285078
YDR322C-A	-0.772887	0.00561208	0.0215408
YOR086C	-0.775717	0.00248618	0.0111821
YBL113C	-0.778086	0.00558484	0.0214715
YDR232W	-0.778723	0.0101725	0.0350351
YNL271C	-0.778857	0.00327151	0.0140578
YGR119C	-0.779127	0.00999675	0.0346036
YKR018C	-0.779137	0.000402904	0.00251561
YDL171C	-0.781255	0.00137289	0.00694426
YJL129C	-0.783392	0.00797327	0.0286484
YMR259C	-0.785112	0.00144414	0.0071984
YPL022W	-0.785549	0.0013378	0.00677927
YBR036C	-0.785608	0.0095259	0.0332044
YOR023C	-0.786357	0.00421411	0.0171282
YMR246W	-0.787052	0.000922208	0.00502631
YOL049W	-0.78742	0.00132735	0.00675751
YBR003W	-0.787673	0.00108029	0.00571741
YOR011W	-0.787706	0.0128963	0.042165
YOR063W	-0.789445	0.00262838	0.0117071
YJL070C	-0.790038	0.00216099	0.00998207
YPL104W	-0.790437	0.00743656	0.0270782
YNL090W	-0.79115	0.00697261	0.0257273
YGL200C	-0.791218	0.00172893	0.00835218
YDR384C	-0.795308	0.00365928	0.0152809
YBL102W	-0.795804	0.00837227	0.0297892
YBL022C	-0.796234	0.00100388	0.00539428
YJL039C	-0.79721	0.000253418	0.0017347
YMR100W	-0.798264	0.00232279	0.0106054
YFR041C	-0.801642	0.00331253	0.0141895
YDR371W	-0.802013	0.00841587	0.0299055
YJR075W	-0.803071	0.00319419	0.0137795
YBR172C	-0.804163	0.00168486	0.00816805
YDR291W	-0.804619	0.00147382	0.0073197
YHL003C	-0.805411	0.000548252	0.00321504
YOL092W	-0.805872	0.00313083	0.0135595
YGL233W	-0.806194	0.0016606	0.00807902
YDL063C	-0.806461	0.00783336	0.0282382
YMR301C	-0.807655	0.00522658	0.0203967
YJL117W	-0.80943	0.000620352	0.00357961
YDR205W	-0.811596	0.00537251	0.0208622
YDL176W	-0.812795	0.00927388	0.0324497
YDL164C	-0.813353	0.000960415	0.00518813
YDR194C	-0.815031	0.00248808	0.0111821
YBR102C	-0.815877	0.00503882	0.0198476
YER103W	-0.817104	0.00227472	0.0104196
YBR023C	-0.817334	0.0029203	0.0128096
YGR117C	-0.818417	0.000923977	0.00503095
YKL213C	-0.820445	0.000170651	0.00124757
YGR216C	-0.820724	0.00845754	0.0299953
YNL275W	-0.821524	0.0156511	0.0496306
YCR069W	-0.823059	0.00562879	0.0215672
YOR151C	-0.823497	0.000341587	0.00219569
YGR274C	-0.824151	0.00442599	0.017857
YPR128C	-0.824932	0.000823433	0.00455588
YPR029C	-0.825059	0.00113851	0.00595608
YLR005W	-0.825199	0.00208824	0.00969503
YAL029C	-0.829891	0.000349873	0.00223585
YKL203C	-0.830882	0.000324745	0.00212226
YGL002W	-0.831369	0.00561797	0.0215408
YGR227W	-0.831611	0.00174474	0.00839159
YBR175W	-0.832999	0.00873699	0.0308666
YLR206W	-0.833989	0.00579565	0.0220304
YJR068W	-0.834294	0.00209005	0.0096952
YLR224W	-0.835144	0.00475857	0.0189582
YNL241C	-0.835479	0.00447902	0.0180312
YER114C	-0.837182	0.000709987	0.00401377
YPL134C	-0.838123	0.0103711	0.0355942
YNL005C	-0.839793	0.00581596	0.0220684
YML029W	-0.84	0.00267871	0.0118926
YGL195W	-0.840596	0.000126661	0.000978143
YHR098C	-0.842401	0.000296676	0.00197652
YJR140C	-0.845442	0.00174052	0.00838004
YNL088W	-0.845649	0.000373955	0.00235678
YPR089W	-0.84581	0.0010086	0.00541111
YIL147C	-0.846261	0.00242585	0.0109925
YMR282C	-0.84715	0.00485439	0.0192874
YKL113C	-0.84726	0.00341721	0.0145228
YJR106W	-0.850222	0.0141879	0.0458142
YER019W	-0.851385	0.0092661	0.0324497
YCL014W	-0.854042	0.00106594	0.00566335
YCR106W	-0.85415	0.00813312	0.0291464
YFR040W	-0.855147	0.000403542	0.00251561
YNL238W	-0.855196	0.0012084	0.00626245
YDL195W	-0.855738	0.00124776	0.00642393
YLR459W	-0.855981	0.0022538	0.0103324
YPL138C	-0.856081	0.00514548	0.0201663
YJL194W	-0.856973	0.00194583	0.00915791
YGL084C	-0.857099	0.00133562	0.00677513
YGL012W	-0.857293	0.00330342	0.0141726
YBR070C	-0.85769	0.00756221	0.0274593
YMR190C	-0.858358	0.00139842	0.00702797
YNL278W	-0.858387	0.00155765	0.00764604
YOL138C	-0.860006	0.00311017	0.0134913
YLR228C	-0.860529	0.00927261	0.0324497
YLR207W	-0.861551	0.000814214	0.00451553
YDR410C	-0.863588	0.00108294	0.00572591
YPR190C	-0.866869	0.00152266	0.00750177
YLR454W	-0.867916	0.00106289	0.00565257
YDR452W	-0.86916	0.000672286	0.00383175
YPL094C	-0.869373	0.000846605	0.00466058
YLR099C	-0.870771	0.00310073	0.013461
YAR019C	-0.871278	0.00348771	0.0147555
YBR029C	-0.872175	0.000398992	0.00249734
YLR138W	-0.873364	0.000351323	0.0022425
YML104C	-0.873397	0.00740006	0.0269777
YLR056W	-0.874398	0.00389819	0.0160864
YOR358W	-0.874663	0.0155832	0.0495432
YDR489W	-0.879212	0.0069037	0.0255246
YPL172C	-0.880574	0.00651364	0.0243285
YDR047W	-0.881523	0.00217351	0.010023
YNL293W	-0.881779	0.00258942	0.0115711
YOR138C	-0.882477	0.000407215	0.00252743
YPL137C	-0.882873	0.00175034	0.00840376
YGL040C	-0.884412	0.000235009	0.00162696
YDR408C	-0.885269	0.00621969	0.023326
YER081W	-0.886039	0.00387711	0.0160318
YDR200C	-0.887561	0.00812175	0.0291246
YLR430W	-0.888841	9.27049e-05	0.000747502
YPR074C	-0.893572	0.00143922	0.00718693
YDL089W	-0.893675	0.00312434	0.0135421
YNR013C	-0.897283	0.00103794	0.00555223
YNL049C	-0.897806	0.000517549	0.00306721
YHR045W	-0.899112	0.0004559	0.00278053
YJR117W	-0.899389	0.000216488	0.00151403
YBL011W	-0.903934	0.000606202	0.00350243
YDR434W	-0.904542	0.000302804	0.00200758
YER107C	-0.904866	0.000253894	0.00173579
YBR059C	-0.905682	0.00095529	0.00517064
YNL023C	-0.906185	0.000396634	0.00248826
YBR092C	-0.906529	0.00353581	0.0149015
YJL134W	-0.909552	0.000257592	0.00175451
YJL185C	-0.909703	0.0158021	0.0499461
YIL162W	-0.909725	0.00336803	0.0144048
YPL231W	-0.910607	0.000354498	0.00225227
YLR241W	-0.910965	0.000198177	0.00140388
YER005W	-0.912847	0.000412634	0.00254783
YBL032W	-0.917075	0.000129702	0.000990469
YLR245C	-0.920181	0.00971108	0.0337855
YDR123C	-0.920527	0.0109222	0.0370584
YHR044C	-0.921137	0.00325365	0.013992
YER083C	-0.922221	0.00208636	0.00969503
YMR217W	-0.922295	0.000494766	0.0029487
YKR039W	-0.922452	0.00249895	0.0112217
YML048W	-0.923173	0.000555556	0.00325092
YER123W	-0.9232	0.000878686	0.00479864
YBR168W	-0.92344	0.015129	0.0482561
YPR105C	-0.924501	0.000527748	0.00311815
YFR025C	-0.925418	0.00049419	0.00294847
YCL034W	-0.926789	0.000645116	0.0036961
YKL046C	-0.927506	0.00349751	0.0147752
YEL029C	-0.927655	0.00456481	0.0183361
YBR205W	-0.92939	0.00035356	0.00224892
YMR047C	-0.93007	0.00190292	0.00900236
YPR171W	-0.93074	0.00578466	0.0220259
YDR128W	-0.931171	0.000538691	0.00317571
YLR106C	-0.933045	9.80185e-05	0.00078612
YGL160W	-0.936654	0.00188074	0.00891279
YKL201C	-0.937698	0.000850197	0.00467097
YDR034C	-0.938098	0.000414176	0.00255447
YBR287W	-0.939427	0.000729455	0.00411481
YER168C	-0.939608	8.80602e-05	0.000711961
YBR044C	-0.939799	0.0019923	0.00935255
YBR084W	-0.942159	1.19418e-05	0.000130953
YNL287W	-0.944373	3.15466e-05	0.000293969
YJL137C	-0.945182	0.00206357	0.00962939
YFL041W	-0.945412	0.000228545	0.00158823
YML117W	-0.946725	0.000852262	0.00467296
YLR188W	-0.947103	0.000195909	0.00139684
YDR180W	-0.948023	0.000293739	0.00195969
YIL043C	-0.948429	0.00254139	0.0113843
YLL048C	-0.950223	0.00145788	0.00726025
YPL224C	-0.950501	0.00022351	0.00155719
YBL074C	-0.951894	0.00350893	0.014811
YHR131C	-0.954089	0.00221929	0.0101913
YDR347W	-0.956272	0.000458194	0.00278832
YIL009W	-0.957038	9.7296e-05	0.00078222
YNL025C	-0.957572	0.00414541	0.0169495
YKL175W	-0.957928	0.00830648	0.0296128
YGR159C	-0.958124	0.000326336	0.00213012
YOR025W	-0.958692	0.000224484	0.00156199
YJR033C	-0.95926	0.000751208	0.00421584
YOR321W	-0.960764	0.00126669	0.00649091
YKL194C	-0.961543	0.00112929	0.00591962
YPR181C	-0.962472	7.96739e-05	0.000652992
YBL004W	-0.965221	3.96285e-05	0.000358553
YCR057C	-0.965864	0.000211494	0.00148289
YMR036C	-0.966215	0.00361905	0.0151591
YLL031C	-0.968004	0.000182527	0.00131683
YHR199C	-0.968295	0.00290921	0.0127712
YNL106C	-0.968738	0.000477555	0.0028774
YDR141C	-0.969854	2.50806e-05	0.000242534
YML088W	-0.970034	0.000434308	0.00265772
YDR301W	-0.970588	0.000176253	0.00127661
YLR253W	-0.976131	0.000330989	0.00215792
YEL032W	-0.976672	5.07421e-05	0.000445853
YDR251W	-0.978858	0.000183284	0.00132056
YGR090W	-0.979745	0.000106338	0.000844998
YPL270W	-0.981113	0.000150256	0.00113012
YNL137C	-0.984963	0.000397775	0.00249257
YHR119W	-0.985476	0.000153783	0.00115029
YPL063W	-0.986818	2.10576e-05	0.000209164
YLR247C	-0.988393	3.33774e-05	0.000309659
YMR262W	-0.988656	0.00389912	0.0160864
YNL011C	-0.989371	0.000403842	0.00251561
YBR086C	-0.989619	0.000128535	0.0009843
YHR057C	-0.991005	0.000490581	0.00293973
YBL055C	-0.991368	0.000426304	0.00261457
YNL240C	-0.992543	0.00687183	0.0254239
YGR125W	-0.995468	3.91286e-05	0.000355202
YHR074W	-0.996773	4.9464e-05	0.00043603
YPL144W	-0.997219	0.00294608	0.012902
YOL063C	-0.99941	5.58998e-05	0.000485735
YER163C	-1.00026	0.000344094	0.00220663
YER184C	-1.0009	0.00476116	0.0189582
YOL020W	-1.00145	0.000139075	0.00105034
YGR023W	-1.00184	0.00394253	0.0162411
YJR031C	-1.00203	1.30785e-05	0.000140606
YFL025C	-1.00511	0.000197663	0.00140205
YLR134W	-1.00515	0.00452949	0.018221
YNL309W	-1.00743	0.00167549	0.00814373
YJL132W	-1.00753	0.000763921	0.0042697
YLR299W	-1.00821	6.76192e-05	0.000570394
YHL004W	-1.00872	0.000144035	0.00108482
YCR081W	-1.00918	3.64789e-05	0.000334471
YDR359C	-1.0112	0.000130993	0.000998939
YJR013W	-1.01131	0.000103106	0.0008229
YGR112W	-1.01313	0.000736308	0.00414494
YDR264C	-1.0145	7.95291e-05	0.000652782
YGL021W	-1.01455	0.00151744	0.0074956
YNL073W	-1.01901	0.000281822	0.00189599
YKR095W	-1.02399	0.000323026	0.00211607
YGL236C	-1.02749	0.00130381	0.00665005
YBR163W	-1.02763	0.00149595	0.00740946
YJR143C	-1.0279	1.77201e-05	0.00018263
YLL022C	-1.0279	0.000494152	0.00294847
YBR274W	-1.02986	0.000319266	0.00209896
YDL235C	-1.03037	6.809e-05	0.000573483
YER154W	-1.03164	0.000686012	0.00389783
YNL094W	-1.0353	0.000171789	0.00125255
YNL101W	-1.03561	0.000620867	0.00357961
YOR098C	-1.03648	6.99899e-05	0.000586781
YNL046W	-1.03835	0.00193481	0.00911863
YKR070W	-1.04201	5.23896e-05	0.000456681
YHR110W	-1.04218	0.00115806	0.00602435
YGL243W	-1.04258	0.00402256	0.0165335
YDL180W	-1.04266	0.000969984	0.00523467
YMR135C	-1.04581	4.31762e-05	0.000385562
YLL015W	-1.04595	6.04644e-05	0.000522089
YIL014W	-1.046	0.000107651	0.0008542
YNL219C	-1.04865	0.00016602	0.00122515
YCR037C	-1.04927	1.10077e-05	0.000121929
YDR072C	-1.05065	2.80438e-05	0.000266028
YLR361C	-1.05148	0.000142723	0.00107641
YDL144C	-1.05255	0.00519273	0.0202935
YAL056W	-1.05305	2.74511e-05	0.000261764
YOR262W	-1.05506	0.000832843	0.00460331
YGR108W	-1.05627	0.000696661	0.00395015
YCL052C	-1.0569	3.88837e-05	0.000353565
YGL197W	-1.05702	7.61734e-06	8.79281e-05
YDR506C	-1.05792	0.00168735	0.00817294
YDL073W	-1.05914	0.000240556	0.00165908
YML098W	-1.06061	0.00127605	0.00652669
YGL203C	-1.06063	7.21249e-06	8.3962e-05
YHL011C	-1.06073	0.000108414	0.000859011
YDR459C	-1.06554	0.00244332	0.0110362
YMR064W	-1.06822	0.000442477	0.00270468
YOR360C	-1.06842	2.77755e-05	0.000263939
YGR232W	-1.0685	0.000152251	0.00114355
YJL044C	-1.06971	0.000288944	0.00193677
YDL220C	-1.07209	0.000952338	0.00515975
YHR031C	-1.0729	0.000119573	0.000935265
YGR032W	-1.07572	0.00209454	0.00969962
YLL054C	-1.07945	0.00680494	0.0252275
YBR069C	-1.08017	0.000138181	0.00104647
YPL221W	-1.08077	6.08101e-05	0.000523425
YDL140C	-1.0811	8.57789e-06	9.73759e-05
YKL128C	-1.08142	9.07793e-06	0.000102627
YML102W	-1.0824	0.000127286	0.000981592
YDR245W	-1.08297	3.72081e-06	4.88068e-05
YLR450W	-1.08398	6.32433e-05	0.000540129
YHR178W	-1.08535	0.000648262	0.00371025
YER164W	-1.08619	0.0003203	0.00210324
YOR260W	-1.08994	1.28299e-06	1.9273e-05
YNR055C	-1.09094	8.81674e-05	0.000711961
YOL057W	-1.09106	3.0879e-06	4.13959e-05
YJL111W	-1.09122	2.0182e-05	0.000202671
YDR406W	-1.09225	0.00109165	0.00575533
YMR275C	-1.09292	2.59289e-05	0.000249418
YBL106C	-1.09363	0.000753906	0.00422665
YFL047W	-1.0967	3.22126e-06	4.27655e-05
YNR031C	-1.09772	6.07784e-05	0.000523425
YLR071C	-1.09851	1.92488e-05	0.000195809
YGL173C	-1.09946	3.9952e-06	5.13014e-05
YNR066C	-1.09985	0.0055304	0.0213243
YGL155W	-1.10021	5.08222e-05	0.000445853
YLR089C	-1.10124	4.91627e-06	6.07115e-05
YLL035W	-1.10131	0.000153683	0.00115029
YDR481C	-1.10145	0.000476627	0.00287497
YJL041W	-1.10168	2.71462e-05	0.000259308
YDR503C	-1.10259	0.000639715	0.00366899
YCL063W	-1.1054	0.000451251	0.00275524
YFR021W	-1.10628	0.000335533	0.00216949
YNL172W	-1.10708	0.000185676	0.0013308
YNL127W	-1.10746	0.00028963	0.001939
YDL066W	-1.10878	2.40611e-05	0.000233499
YBR241C	-1.11078	0.00377982	0.0157244
YPR037C	-1.11352	0.00244353	0.0110362
YMR264W	-1.11726	0.000312782	0.00206376
YNR016C	-1.11826	6.59599e-07	1.06999e-05
YNL169C	-1.11872	1.64038e-06	2.36069e-05
YKR038C	-1.11911	4.89527e-05	0.000432218
YHR117W	-1.11923	5.94499e-06	7.14833e-05
YLR352W	-1.11941	7.46556e-05	0.000619269
YDR188W	-1.12328	0.000108688	0.000859475
YBL042C	-1.12452	5.64372e-05	0.000489629
YHR115C	-1.12466	0.000161265	0.0011965
YHR194W	-1.12596	0.00161074	0.00787838
YOL103W	-1.127	0.000241948	0.00166449
YEL058W	-1.12712	0.000167979	0.00123357
YEL031W	-1.12767	1.32303e-06	1.97661e-05
YMR150C	-1.12904	0.000787365	0.00439178
YLR088W	-1.13165	4.12792e-06	5.23921e-05
YKR098C	-1.13392	0.00342662	0.0145419
YPL047W	-1.13408	0.00470084	0.0187725
YNR047W	-1.13571	2.61946e-05	0.000251533
YML031W	-1.13715	1.91392e-05	0.000195056
YIL017C	-1.1372	4.49583e-06	5.61517e-05
YMR209C	-1.13753	1.27612e-05	0.000137687
YDL054C	-1.14341	3.34616e-05	0.000309916
YLR422W	-1.14489	2.05615e-05	0.00020598
YKL219W	-1.14677	9.80679e-05	0.00078612
YJR103W	-1.14811	3.60026e-05	0.000331211
YOR116C	-1.14813	1.90036e-07	3.8449e-06
YMR266W	-1.14827	1.8859e-06	2.67194e-05
YMR221C	-1.14872	3.94988e-06	5.09581e-05
YMR013C	-1.15102	0.000118238	0.000926143
YML019W	-1.15309	7.48891e-06	8.6628e-05
YML099C	-1.15339	8.25311e-06	9.40217e-05
YOR275C	-1.15355	0.000266905	0.00180979
YEL025C	-1.15382	0.00017419	0.00126501
YDL237W	-1.15388	7.2007e-06	8.3962e-05
YDR479C	-1.15603	7.02599e-05	0.000588145
YOL062C	-1.1578	4.11917e-06	5.23921e-05
YOL013C	-1.15807	0.00123578	0.00638621
YHR017W	-1.15858	3.40074e-05	0.00031444
YDR483W	-1.15881	5.09349e-07	8.64631e-06
YIL042C	-1.16704	0.000755157	0.00422934
YPL174C	-1.16709	0.00137876	0.0069611
YLR427W	-1.1677	1.50217e-05	0.000157184
YGR281W	-1.17056	1.4258e-05	0.000150051
YGL234W	-1.1708	3.17684e-05	0.000295231
YGL167C	-1.17423	5.16948e-07	8.74823e-06
YDR335W	-1.17473	8.57366e-07	1.35474e-05
YPR019W	-1.17519	2.52234e-07	4.86971e-06
YGL247W	-1.17556	0.00585044	0.0221839
YDR376W	-1.17616	1.72853e-05	0.000178821
YGL225W	-1.17718	2.18939e-05	0.000215519
YPL245W	-1.1778	2.09518e-05	0.000208491
YGL154C	-1.17963	0.00303491	0.0132277
YFR039C	-1.18052	0.000128466	0.0009843
YJR127C	-1.18521	6.39063e-05	0.000544942
YML127W	-1.19039	4.84319e-07	8.37703e-06
YOR003W	-1.19082	0.00144243	0.00719638
YHR163W	-1.19225	1.58076e-05	0.000164465
YCR061W	-1.19328	0.00133247	0.00677513
YGR121C	-1.19372	0.000796529	0.00443829
YBR276C	-1.19528	0.000125784	0.000972739
YBL089W	-1.19688	4.30233e-05	0.000385411
YGR203W	-1.19823	0.00388595	0.0160563
YBR093C	-1.19957	0.000125115	0.000970306
YPL032C	-1.19986	3.87559e-05	0.000352988
YCR047C	-1.20106	0.000184422	0.00132354
YHL038C	-1.20149	1.80701e-05	0.000185193
YGR286C	-1.2018	7.26954e-05	0.000605758
YHR091C	-1.20328	0.000986651	0.00531415
YBR094W	-1.2037	6.22401e-06	7.41874e-05
YLR443W	-1.20495	0.000760311	0.00425386
YLL051C	-1.20579	2.0709e-05	0.000206826
YLR113W	-1.20611	3.15422e-06	4.21819e-05
YOL073C	-1.20783	4.59128e-05	0.000407074
YMR273C	-1.20898	7.89351e-05	0.000648877
YHR133C	-1.2104	4.19055e-07	7.43586e-06
YBR074W	-1.21115	1.36493e-06	2.01722e-05
YEL011W	-1.21125	2.08249e-05	0.000207605
YLR382C	-1.21746	2.96124e-05	0.000278978
YJR066W	-1.21754	4.92846e-07	8.47109e-06
YNL139C	-1.22187	3.68494e-07	6.69024e-06
YEL043W	-1.2233	6.404e-05	0.000545235
YCL002C	-1.22377	0.000621897	0.00358179
YDR456W	-1.22617	2.26535e-05	0.000221802
YGL067W	-1.22629	3.23446e-06	4.2837e-05
YHL017W	-1.23024	1.32113e-06	1.97661e-05
YOL060C	-1.23133	2.00162e-05	0.000201693
YBR187W	-1.2348	2.76775e-07	5.25107e-06
YJL183W	-1.23517	2.15991e-07	4.27537e-06
YNR038W	-1.23928	5.82169e-06	7.03091e-05
YLR087C	-1.24039	9.79956e-06	0.000110331
YOR201C	-1.24119	1.12393e-05	0.000124244
YBL014C	-1.24209	0.000254548	0.00173809
YIR002C	-1.24568	2.05867e-05	0.00020598
YJR001W	-1.2466	4.36454e-07	7.67013e-06
YGR198W	-1.24869	2.65215e-06	3.64455e-05
YLR373C	-1.24922	2.92485e-06	3.94029e-05
YMR056C	-1.2504	0.00135162	0.00684296
YPR198W	-1.25092	1.68091e-06	2.39671e-05
YAL049C	-1.2521	1.37702e-05	0.000146321
YIR039C	-1.25223	0.000410033	0.00253539
YMR171C	-1.25257	1.46773e-06	2.12898e-05
YJL101C	-1.25421	2.14466e-07	4.26057e-06
YNR043W	-1.25516	3.8592e-06	5.01421e-05
YER038C	-1.25835	0.00561723	0.0215408
YKR050W	-1.26167	0.00734511	0.0268303
YBR293W	-1.26408	0.000814372	0.00451553
YEL055C	-1.26573	2.33999e-07	4.56589e-06
YNL326C	-1.26657	0.000127891	0.000983487
YHL032C	-1.26669	0.000128806	0.000984994
YKL165C	-1.26771	3.8708e-07	7.00448e-06
YNL237W	-1.27012	0.00143194	0.00716364
YHL035C	-1.27181	0.000312659	0.00206376
YOR324C	-1.2731	5.13372e-05	0.00044822
YKL182W	-1.27366	1.82905e-08	4.86829e-07
YPR169W	-1.27495	9.52162e-07	1.49163e-05
YML018C	-1.27766	1.36036e-05	0.000144832
YJL168C	-1.28034	2.4084e-06	3.35159e-05
YNL048W	-1.28494	4.45976e-06	5.58284e-05
YER118C	-1.28584	4.0323e-07	7.21517e-06
YDL189W	-1.28821	2.1451e-05	0.000211921
YIL023C	-1.29403	6.57576e-05	0.000556403
YML115C	-1.29548	1.80598e-08	4.83033e-07
YKL055C	-1.29791	0.00236406	0.0107827
YLR007W	-1.29793	0.000461312	0.00280108
YBL079W	-1.29876	1.44167e-08	4.07458e-07
YIL153W	-1.29887	0.000816663	0.004523
YDR387C	-1.30419	4.68962e-06	5.81746e-05
YGL172W	-1.30432	1.45205e-06	2.11183e-05
YDR349C	-1.30548	9.56809e-07	1.49464e-05
YDL123W	-1.30835	0.000667458	0.00381187
YOR213C	-1.31499	0.000269894	0.00182695
YLR384C	-1.31674	1.05076e-09	4.0289e-08
YML113W	-1.31788	0.000710079	0.00401377
YDR321W	-1.31797	6.19222e-06	7.41309e-05
YNL284C	-1.32193	2.9914e-07	5.57886e-06
YCR028C	-1.32486	6.97409e-06	8.18821e-05
YPR159W	-1.32865	1.16536e-06	1.77185e-05
YGL027C	-1.33002	1.40618e-07	2.90946e-06
YPL222W	-1.33031	5.96782e-05	0.000516113
YGL215W	-1.33224	4.29254e-08	1.0113e-06
YER144C	-1.33301	6.91894e-07	1.11251e-05
YBR283C	-1.33397	1.42435e-07	2.93599e-06
YDR422C	-1.33608	7.42599e-07	1.18708e-05
YPR086W	-1.33685	2.00458e-07	4.01135e-06
YPL050C	-1.34308	5.79417e-07	9.65636e-06
YAR002C-A	-1.34589	1.66422e-06	2.38873e-05
YER152C	-1.34784	4.76509e-05	0.000421403
YOR316C	-1.34798	6.19125e-06	7.41309e-05
YNR039C	-1.34977	4.56871e-06	5.69324e-05
YMR202W	-1.35343	6.51001e-06	7.70937e-05
YDR407C	-1.35474	1.29954e-08	3.71114e-07
YJR073C	-1.35691	0.000125094	0.000970306
YGR287C	-1.35739	0.00198201	0.00931222
YBR271W	-1.35927	4.56572e-05	0.000405735
YPR117W	-1.35957	2.27202e-05	0.000222059
YGL198W	-1.36044	0.000173616	0.00126252
YKL034W	-1.36146	1.89311e-07	3.84443e-06
YJL212C	-1.36183	3.89137e-06	5.04407e-05
YKL018C-A	-1.37205	0.000429481	0.00263111
YOR067C	-1.37222	2.38024e-08	6.12715e-07
YNL280C	-1.37227	4.19565e-06	5.31287e-05
YOL075C	-1.37805	8.46162e-07	1.3409e-05
YKL038W	-1.37945	3.19603e-06	4.2637e-05
YKL181W	-1.38028	4.18855e-08	9.98515e-07
YNL320W	-1.38241	1.06074e-05	0.000118212
YGR178C	-1.38375	3.43522e-09	1.12786e-07
YLR404W	-1.38685	0.000217589	0.0015198
YDR315C	-1.38863	0.000578675	0.00336824
YCL057W	-1.38888	1.20968e-09	4.54294e-08
YBL105C	-1.38955	8.05833e-09	2.36277e-07
YOR099W	-1.38985	2.93603e-08	7.31738e-07
YHR072W	-1.39004	2.14921e-08	5.61148e-07
YER113C	-1.39041	7.62171e-08	1.68507e-06
YPL017C	-1.39192	0.000518007	0.00306721
YDR488C	-1.39269	0.000474031	0.00286561
YMR257C	-1.39272	0.000154197	0.00115029
YOR071C	-1.39408	5.92374e-06	7.13843e-05
YBR133C	-1.39711	1.32213e-08	3.75608e-07
YFR020W	-1.39923	0.00141346	0.00708409
YOR246C	-1.40233	4.31664e-07	7.61034e-06
YBR229C	-1.40896	1.04264e-07	2.20726e-06
YMR009W	-1.40994	3.31175e-06	4.36498e-05
YPL246C	-1.41178	2.90564e-07	5.45604e-06
YLL018C-A	-1.41297	0.00138758	0.00699919
YEL016C	-1.41919	7.34628e-06	8.53382e-05
YBR085W	-1.42005	0.000652015	0.00372784
YPR138C	-1.42098	1.27818e-05	0.000137687
YIL046W	-1.42106	1.90292e-06	2.68909e-05
YDR490C	-1.42737	2.85228e-08	7.1545e-07
YOR291W	-1.42759	2.448e-09	8.23461e-08
YEL042W	-1.43094	1.58486e-07	3.24246e-06
YNL321W	-1.43447	2.64988e-05	0.000253566
YAL058W	-1.43798	4.42605e-06	5.56322e-05
YDR497C	-1.44057	3.67274e-09	1.19867e-07
YJL092W	-1.44295	7.67191e-07	1.22282e-05
YGL140C	-1.44645	2.53772e-07	4.88221e-06
YJL130C	-1.44691	4.64813e-11	2.57431e-09
YLR237W	-1.45342	7.97908e-08	1.75226e-06
YAL023C	-1.45353	2.76335e-06	3.76901e-05
YLR173W	-1.45418	4.51126e-07	7.90263e-06
YMR272C	-1.45793	3.55004e-07	6.48829e-06
YOR222W	-1.46104	1.68287e-06	2.39671e-05
YHR083W	-1.46134	1.28073e-06	1.9273e-05
YPR023C	-1.46177	7.96468e-10	3.18761e-08
YLR203C	-1.46222	4.7536e-09	1.48937e-07
YOR389W	-1.46668	2.95322e-06	3.96875e-05
YKR051W	-1.46904	2.73644e-06	3.75098e-05
YGL229C	-1.47099	3.0383e-05	0.000284284
YJR110W	-1.47115	1.63492e-07	3.33243e-06
YLR059C	-1.47582	2.13319e-05	0.000211506
YGL257C	-1.47614	2.17631e-07	4.29235e-06
YCR017C	-1.47633	1.4641e-08	4.11674e-07
YMR241W	-1.47745	1.99565e-08	5.23547e-07
YCR044C	-1.48206	4.83003e-08	1.12216e-06
YDR249C	-1.48504	0.000156918	0.00116899
YEL036C	-1.48931	2.43946e-07	4.72634e-06
YDR144C	-1.48962	5.18108e-09	1.59753e-07
YER119C	-1.4922	8.16602e-06	9.34746e-05
YMR054W	-1.49391	4.76373e-08	1.11147e-06
YJL197W	-1.50104	5.59303e-09	1.68498e-07
YLL010C	-1.50178	4.29753e-08	1.0113e-06
YLR020C	-1.50763	1.26378e-06	1.90889e-05
YDR261C	-1.51204	6.07023e-07	1.00553e-05
YIL039W	-1.51417	7.98952e-08	1.75226e-06
YKR044W	-1.51748	2.8182e-05	0.000266877
YCL056C	-1.51784	0.000958514	0.00518297
YAR014C	-1.51822	5.65509e-08	1.28659e-06
YML081W	-1.52122	2.79871e-10	1.32287e-08
YGL116W	-1.52325	2.77845e-09	9.17727e-08
YOR085W	-1.53259	4.2997e-09	1.36273e-07
YPL244C	-1.53314	1.83879e-06	2.61194e-05
YJR039W	-1.53635	3.04072e-07	5.65161e-06
YOL112W	-1.54242	2.08101e-06	2.9182e-05
YBR208C	-1.54336	5.55658e-09	1.68325e-07
YOR355W	-1.54485	1.63792e-06	2.36069e-05
YDL109C	-1.5456	0.000692643	0.00393143
YGL104C	-1.54616	1.15687e-08	3.321e-07
YKR028W	-1.54758	5.75108e-08	1.30302e-06
YER145C	-1.54782	4.77188e-07	8.27981e-06
YEL053C	-1.55689	2.09842e-07	4.18387e-06
YNL029C	-1.55888	2.87928e-06	3.89804e-05
YLR266C	-1.56215	5.52979e-07	9.27212e-06
YBL063W	-1.56301	2.31763e-05	0.000226113
YLR378C	-1.5643	3.64475e-07	6.63927e-06
YGR177C	-1.56689	2.73062e-07	5.1986e-06
YNL307C	-1.57489	2.92595e-10	1.35958e-08
YML023C	-1.5752	6.72933e-06	7.93482e-05
YAL022C	-1.5754	9.40232e-09	2.72767e-07
YPR108W-A	-1.57956	0.011211	0.0378976
YMR250W	-1.5805	1.00387e-13	1.03854e-11
YPL023C	-1.58171	4.09887e-10	1.79793e-08
YDR375C	-1.58504	8.49987e-08	1.84209e-06
YBR243C	-1.58694	6.84116e-08	1.5248e-06
YMR010W	-1.58701	6.18694e-07	1.01871e-05
YLR083C	-1.59364	1.94376e-08	5.14862e-07
YLR090W	-1.59556	3.13772e-08	7.78466e-07
YJR124C	-1.60221	4.23586e-09	1.3503e-07
YPR095C	-1.606	2.34188e-09	7.92624e-08
YBR148W	-1.60672	0.00337969	0.0144321
YMR277W	-1.61057	4.05481e-09	1.3078e-07
YIL114C	-1.61372	1.17554e-07	2.45076e-06
YBR110W	-1.61576	5.03378e-08	1.16457e-06
YAL040C	-1.6371	1.54427e-08	4.2614e-07
YOR149C	-1.64152	4.6167e-07	8.036e-06
YPL189W	-1.65408	0.0100895	0.0348368
YNL130C	-1.65517	1.01494e-12	8.69514e-11
YHR078W	-1.65747	5.20636e-08	1.19441e-06
YJR004C	-1.66492	0.000108786	0.000859475
YLR214W	-1.66535	1.55808e-08	4.27147e-07
YOL061W	-1.67082	1.08432e-11	7.38464e-10
YMR176W	-1.67099	4.55076e-10	1.9803e-08
YDR404C	-1.674	3.58102e-10	1.6094e-08
YIL088C	-1.6761	7.26464e-09	2.15308e-07
YCL045C	-1.67787	1.39239e-12	1.12272e-10
YGL142C	-1.67918	4.14701e-08	9.92929e-07
YNL080C	-1.68755	8.40536e-08	1.82883e-06
YKL146W	-1.68947	2.41895e-10	1.18421e-08
YMR058W	-1.68968	4.11992e-11	2.32882e-09
YPR075C	-1.69445	4.09942e-09	1.31445e-07
YMR252C	-1.69761	0.0030644	0.0133244
YDR135C	-1.70253	8.33783e-12	5.78687e-10
YKL019W	-1.71301	6.11607e-10	2.50257e-08
YBL017C	-1.71618	1.12112e-11	7.40616e-10
YOL069W	-1.71709	2.58535e-08	6.53248e-07
YHR047C	-1.72027	2.776e-10	1.32287e-08
YLR141W	-1.72164	0.000159135	0.0011839
YHR042W	-1.72558	1.17336e-07	2.45076e-06
YLL038C	-1.72562	1.61038e-08	4.37116e-07
YOR127W	-1.72888	1.59588e-08	4.35334e-07
YER060W	-1.72983	9.7406e-08	2.07007e-06
YER060W-A	-1.73295	6.78495e-07	1.0974e-05
YDL095W	-1.74103	5.75677e-10	2.37326e-08
YHR155W	-1.74636	1.12013e-10	5.84923e-09
YKL176C	-1.7525	3.72296e-11	2.12635e-09
YAL031C	-1.75477	1.8217e-09	6.44413e-08
YLR112W	-1.75597	0.0116566	0.0389239
YCL010C	-1.76251	9.48661e-09	2.73764e-07
YOR034C	-1.76691	2.02133e-11	1.2449e-09
YLR130C	-1.76913	1.49603e-12	1.17182e-10
YCL005W	-1.76927	2.58621e-07	4.95215e-06
YML126C	-1.76988	1.27074e-11	8.19703e-10
YNL294C	-1.77155	1.76409e-09	6.28085e-08
YAL009W	-1.77977	3.57314e-06	4.69821e-05
YCL008C	-1.78856	4.09835e-08	9.85582e-07
YGR024C	-1.79538	1.30397e-09	4.83087e-08
YEL065W	-1.79934	4.62953e-09	1.45883e-07
YGR270W	-1.80547	1.53614e-08	4.2614e-07
YLR072W	-1.80881	3.71088e-11	2.12635e-09
YAR071W	-1.81159	1.6829e-06	2.39671e-05
YLR114C	-1.81306	1.05013e-09	4.0289e-08
YKL004W	-1.81436	3.88669e-10	1.71861e-08
YPR164W	-1.84079	1.50328e-11	9.36647e-10
YHR215W	-1.85154	1.12327e-06	1.72037e-05
YJL002C	-1.85554	3.40442e-15	5.49013e-13
YLR417W	-1.85678	3.46646e-10	1.58388e-08
YJL210W	-1.85756	2.18274e-09	7.47999e-08
YER088C	-1.87165	1.10598e-11	7.39526e-10
YGR157W	-1.88328	1.16428e-14	1.55701e-12
YDL207W	-1.8859	3.0545e-10	1.40738e-08
YML106W	-1.88814	2.04008e-16	4.30221e-14
YPR115W	-1.89374	3.96611e-12	2.93868e-10
YCR079W	-1.89472	5.77792e-06	7.00893e-05
YAR003W	-1.89865	1.45195e-11	9.15064e-10
YLR174W	-1.90123	0.000604624	0.003497
YIL047C	-1.90472	3.60812e-12	2.71005e-10
YDR538W	-1.90706	1.30734e-07	2.71521e-06
YLR342W	-1.916	3.73548e-10	1.66517e-08
YAL042W	-1.91728	5.2346e-09	1.60342e-07
YMR006C	-1.92657	1.00269e-14	1.40968e-12
YAL062W	-1.93856	0.000551086	0.00322821
YBR015C	-1.94008	1.44138e-12	1.14537e-10
YOR175C	-1.94083	1.23171e-16	2.93629e-14
YBR235W	-1.96934	1.52808e-09	5.58565e-08
YCR075C	-1.97847	5.18521e-10	2.20391e-08
YPL162C	-1.9808	5.13369e-09	1.59753e-07
YNR065C	-2.00392	0.00486122	0.0193006
YPL264C	-2.01011	5.33354e-11	2.89543e-09
YML056C	-2.01314	5.53491e-13	5.05798e-11
YDR517W	-2.04644	2.93161e-11	1.76637e-09
YOR336W	-2.05283	7.36842e-15	1.12225e-12
YHR033W	-2.05477	1.20878e-05	0.00013229
YJR147W	-2.06929	6.24872e-07	1.0258e-05
YGL022W	-2.07015	7.02014e-12	4.9348e-10
YFR018C	-2.07368	4.26255e-08	1.0113e-06
YHR032W	-2.09662	2.6651e-13	2.51944e-11
YPL015C	-2.11887	1.20382e-10	6.16874e-09
YIL129C	-2.11948	8.07211e-18	2.60349e-15
YJL062W	-2.12146	3.39405e-11	2.00103e-09
YOR378W	-2.12809	0.00193445	0.00911863
YDL197C	-2.1293	4.01727e-08	9.70338e-07
YMR243C	-2.1334	1.40547e-20	8.56243e-18
YOL157C	-2.13342	7.23043e-05	0.000603416
YBR004C	-2.16015	1.39945e-11	8.92229e-10
YIL090W	-2.16283	2.04343e-11	1.2449e-09
YHR041C	-2.16904	8.79942e-08	1.88466e-06
YIR016W	-2.18854	8.45753e-05	0.000687002
YDR093W	-2.20642	1.43182e-15	2.379e-13
YLR077W	-2.20712	5.89191e-17	1.70028e-14
YAL020C	-2.22431	2.21077e-07	4.34468e-06
YFL031W	-2.22703	3.05341e-14	3.80497e-12
YIL085C	-2.22909	9.02712e-14	9.51841e-12
YOL158C	-2.23283	8.44141e-15	1.25093e-12
YPL006W	-2.26356	1.46261e-16	3.21828e-14
YOR377W	-2.27273	2.42953e-13	2.42202e-11
YNL221C	-2.27625	5.27329e-18	1.80709e-15
YIL121W	-2.33171	3.84236e-16	7.80283e-14
YLR348C	-2.33707	5.12036e-11	2.80749e-09
YLR213C	-2.34343	7.50717e-05	0.00062178
YNL014W	-2.35685	3.0184e-11	1.7989e-09
YLR073C	-2.36085	5.30526e-09	1.61604e-07
YLR375W	-2.36856	5.37407e-14	6.13875e-12
YJL093C	-2.40128	1.23338e-14	1.61015e-12
YLR426W	-2.41187	1.18113e-11	7.70968e-10
YJL019W	-2.4193	8.77799e-14	9.4372e-12
YFL050C	-2.42031	0.000153562	0.00115029
YDR275W	-2.43674	1.10651e-09	4.18413e-08
YNL270C	-2.457	7.43152e-11	3.99481e-09
YPR114W	-2.45777	1.46739e-16	3.21828e-14
YKL191W	-2.45813	1.10856e-15	1.96073e-13
YER066W	-2.46849	2.00422e-07	4.01135e-06
YCR048W	-2.47509	5.50066e-10	2.3023e-08
YGR210C	-2.49535	7.83746e-17	2.04632e-14
YHL040C	-2.49613	1.14619e-14	1.55701e-12
YPR066W	-2.50273	6.65289e-10	2.70206e-08
YBR263W	-2.50593	1.05034e-22	8.22713e-20
YHR188C	-2.51068	5.70143e-19	2.84191e-16
YMR063W	-2.51792	2.83806e-10	1.33001e-08
YHR204W	-2.57007	1.29999e-15	2.22745e-13
YLL059C	-2.70773	0.00243818	0.0110301
YGR087C	-2.7294	5.18623e-09	1.59753e-07
YFR034W-A	-2.73088	0.0074375	0.0270782
YBL020W	-2.78161	5.95126e-23	5.43846e-20
YOR002W	-2.82632	1.15619e-27	2.11313e-24
YJR131W	-2.91362	3.01127e-23	3.30216e-20
YJR046W	-2.94534	1.33791e-22	9.16971e-20
YOR192C	-2.98215	3.47296e-12	2.64476e-10
YER176W	-3.10111	8.43e-38	2.31109e-34
YJL213W	-3.24762	0.0101174	0.034902
YFL055W	-3.34581	9.69983e-11	5.11386e-09
YHR071W	-3.43697	1.80496e-27	2.47414e-24
YHL047C	-3.49756	7.68343e-13	6.79488e-11
YGL256W	-3.5174	1.07386e-05	0.000119431
YER174C	-4.14367	3.4567e-50	1.89531e-46
YLR317W	-4.21173	0.00825639	0.0294725
YJL043W	-4.26669	0.00125875	0.0064744
YOL013W-A	-4.28512	0.00943237	0.0329202
YDL086C-A	-5.05535	0.00281211	0.0124045
YPR146C	-5.23813	0.00113654	0.00595193
YGR224W	-5.25998	0.00611221	0.0230241
YGR045C	-5.39031	0.00316877	0.0136914
YGL165C	-5.50571	0.00595489	0.0225177
YDL165W	0.611253	0.0159052	0.0502351
YIL155C	-0.638998	0.0159339	0.0502967
YOR228C	-0.88765	0.0159434	0.0502979
YDL183C	-0.851947	0.0159663	0.0503411
YNR059W	-0.74946	0.01599	0.0503869
YBR079C	0.557804	0.0160277	0.0504768
YKL060C	0.560453	0.0161019	0.0506814
YGR180C	0.568365	0.0161626	0.050843
YHR203C	0.654942	0.0161905	0.0508724
YOR109W	-0.555933	0.016182	0.0508724
YGR048W	0.580084	0.0162131	0.0509143
YLR354C	-0.59068	0.016355	0.0513305
YGR130C	0.684643	0.0163837	0.0513309
YKR087C	0.629995	0.0163857	0.0513309
YLR319C	0.591811	0.0163926	0.0513309
YOR066W	-0.739563	0.0163725	0.0513309
YNL288W	0.607603	0.0164381	0.0514442
YDL025C	0.839493	0.0164751	0.0515304
YEL060C	0.735017	0.016486	0.0515351
YGR106C	-0.669149	0.0165177	0.0516049
YBR125C	-0.671562	0.016533	0.0516232
YJL014W	0.552352	0.0165671	0.051692
YKR069W	0.788531	0.0165739	0.051692
YOR168W	0.582257	0.0167338	0.052161
YDR260C	-0.832231	0.0167524	0.0521762
YER094C	-0.590618	0.0167672	0.0521762
YJL166W	0.668177	0.0167602	0.0521762
YIL079C	-0.798599	0.0168072	0.0522496
YMR208W	-0.642431	0.0168098	0.0522496
YHL013C	0.74906	0.0168449	0.0523288
YDR498C	0.631828	0.0168595	0.0523445
YGR124W	0.542859	0.0168879	0.0524032
YMR096W	1.57603	0.0169141	0.0524548
YOL123W	0.648254	0.0169432	0.0525152
YFL054C	-0.734647	0.0171169	0.0530066
YHR161C	-0.619691	0.017121	0.0530066
YOR230W	0.63101	0.0171361	0.0530234
YDL147W	0.574672	0.0171734	0.0531087
YDR009W	-1.23411	0.0172668	0.0533673
YLR199C	0.636063	0.0173845	0.0537011
YMR155W	-0.651524	0.017507	0.0540488
YPL191C	0.778234	0.0176222	0.0543738
YMR313C	-0.594739	0.0177107	0.0546164
YHR132W-A	0.761688	0.017764	0.0547498
YNL180C	-0.645392	0.0177921	0.0548058
YDL083C	0.489217	0.0178391	0.0549196
YDR124W	1.53099	0.0178597	0.0549364
YGL163C	-0.645187	0.0178646	0.0549364
YFL023W	0.679716	0.0178827	0.0549611
YDL040C	-0.540686	0.0179342	0.0550886
YPR018W	0.785807	0.0179577	0.0551299
YFR026C	-2.84064	0.0179966	0.0552185
YGR113W	0.641825	0.0180557	0.0553687
YDL173W	0.734189	0.0181052	0.0554895
YGL101W	0.621424	0.0181349	0.0555184
YIR003W	0.731892	0.0181308	0.0555184
YDR508C	0.570001	0.0181634	0.0555746
YJL012C	0.554895	0.0183037	0.0559729
YEL004W	-0.819393	0.0183785	0.0561701
YDR062W	-0.563238	0.0184013	0.0562085
YGR225W	1.27319	0.0184514	0.0563041
YIL098C	0.924463	0.0184634	0.0563041
YLR081W	-1.61845	0.0184547	0.0563041
YIL123W	0.83242	0.0184826	0.0563314
YFR028C	-0.566141	0.0185689	0.0565315
YOL036W	0.59491	0.0185648	0.0565315
YMR079W	-0.493483	0.0185955	0.0565811
YOR136W	0.527894	0.0186394	0.0566832
YEL008W	-4.7389	0.0186639	0.0567262
YJL180C	0.752116	0.0187163	0.0568541
YPL266W	0.66039	0.0188321	0.057174
YOR112W	-0.576484	0.0188495	0.0571952
YEL020W-A	0.892538	0.0189207	0.0573796
YNL310C	0.684751	0.0189501	0.0574053
YOL119C	-0.556344	0.0189426	0.0574053
YJL098W	-0.718012	0.0190432	0.0576234
YLR084C	-0.621541	0.0190409	0.0576234
YLR229C	0.549772	0.0190846	0.0577168
YNL006W	-0.615883	0.0191295	0.0578207
YOR028C	0.63356	0.0191812	0.0579451
YLR133W	-0.550755	0.0192036	0.0579491
YNL085W	-0.564059	0.019198	0.0579491
YML067C	-0.595643	0.0192185	0.0579621
YCR086W	0.809527	0.019249	0.0580222
YDR414C	-0.684694	0.0193024	0.0581511
YBR222C	-0.624631	0.0194341	0.0585159
YLR423C	0.810793	0.0194963	0.0586707
YBR225W	0.667753	0.0195333	0.05875
YHR006W	0.630697	0.0196454	0.0590547
YJL001W	0.506991	0.0196784	0.0591216
YKL205W	-0.583331	0.0196994	0.059152
YKL137W	0.697861	0.019759	0.0592857
YNL186W	-0.6421	0.0197655	0.0592857
YAR031W	-0.769487	0.0199029	0.059665
YGL043W	0.585039	0.0199695	0.059832
YCR071C	0.742478	0.0199843	0.0598439
YPR073C	0.582085	0.0200573	0.0600295
YGR044C	-0.615457	0.0201314	0.0601857
YLL036C	-0.589739	0.0201304	0.0601857
YGL135W	0.572062	0.0202038	0.0603363
YPL269W	-0.825091	0.0201993	0.0603363
YNL259C	0.927134	0.0202566	0.0604319
YNL087W	-0.501839	0.0202579	0.0604319
YOL136C	0.642291	0.0203749	0.060748
YGR004W	-0.637848	0.0203983	0.0607848
YHR024C	-0.574718	0.0204294	0.0608114
YOR335C	-0.468386	0.0204287	0.0608114
YMR157C	-0.664333	0.0204992	0.0609701
YPL216W	-0.833173	0.020505	0.0609701
YNR010W	0.814103	0.0205238	0.0609931
YFR014C	0.576046	0.0206191	0.0612429
YIL134W	-0.905388	0.0206587	0.0613274
YLR437C	0.905905	0.0207099	0.0614461
YJR155W	3.46883	0.0208359	0.0617594
YMR312W	0.733303	0.020838	0.0617594
YGR271W	-0.561802	0.0208534	0.0617717
YBR041W	-0.681339	0.0209602	0.0620544
YJL108C	3.51336	0.021045	0.0622719
YDL031W	0.537438	0.0210587	0.0622788
YDL142C	-0.688596	0.021123	0.0624353
YDL012C	0.837266	0.0211451	0.0624669
YDR092W	0.580316	0.0211702	0.0625074
YLR189C	-0.593402	0.0212599	0.0627384
YDR292C	-0.540527	0.0212799	0.0627408
YNL026W	-0.574074	0.0212836	0.0627408
YER155C	-0.635745	0.0213339	0.0628215
YLR227C	1.57398	0.0213336	0.0628215
YAL019W	-0.598171	0.0213716	0.0628989
YBR298C	3.49401	0.021414	0.0629899
YGL023C	-0.704656	0.0215079	0.0632199
YIL051C	0.576059	0.0215153	0.0632199
YNL039W	0.567809	0.02154	0.0632585
YCR093W	-0.530038	0.0215638	0.0632634
YFL037W	-0.580134	0.0215751	0.0632634
YKR021W	0.674661	0.0215763	0.0632634
YDR307W	-0.600435	0.021601	0.0632691
YER175C	0.696078	0.0216013	0.0632691
YPL240C	0.543632	0.0216894	0.0634934
YHR059W	0.991355	0.0217023	0.0634972
YDR140W	0.770996	0.0217381	0.0635681
YBR233W	0.647382	0.0218943	0.0639905
YDR217C	-0.779604	0.0220356	0.0643693
YCL011C	-0.521431	0.0221176	0.0645744
YER125W	-0.546683	0.0221297	0.0645754
YMR233W	0.833815	0.02219	0.0647168
YGL253W	0.645781	0.0223012	0.0650066
YBR076C-A	2.62483	0.022344	0.0650969
YOR115C	0.686702	0.0223955	0.065212
YGL153W	0.616842	0.0224249	0.065263
YGL226W	0.928235	0.0224557	0.0653181
YHR073W	-0.596864	0.0225091	0.0654386
YDR219C	0.662124	0.0227566	0.0661232
YJL054W	-0.545381	0.0227888	0.0661818
YKR092C	-0.72084	0.0228481	0.0662858
YLR014C	0.733416	0.0228488	0.0662858
YMR077C	0.817035	0.0228953	0.0663855
YKR041W	1.27156	0.0229171	0.0664135
YDL045C	-0.619735	0.0229955	0.0666056
YCL029C	-0.726727	0.0230733	0.0667957
YDR008C	-2.46835	0.0232558	0.067125
YDR449C	0.754992	0.0232575	0.067125
YDL046W	0.507378	0.023203	0.067125
YIL105C	0.555846	0.0232709	0.067125
YJL187C	-0.73227	0.0232728	0.067125
YJL096W	0.68623	0.0232388	0.067125
YPL034W	1.18018	0.0232161	0.067125
YMR015C	0.573474	0.0233274	0.0672473
YKL086W	1.08041	0.0233838	0.0673743
YLL058W	-0.583065	0.023425	0.0674192
YNR048W	-0.698411	0.0234231	0.0674192
YOR077W	0.758512	0.0234362	0.0674192
YKR075C	1.17828	0.0234662	0.0674699
YDR463W	0.586466	0.0234951	0.0675176
YIL030C	-0.60179	0.0235212	0.0675219
YJL162C	-0.803649	0.0235208	0.0675219
YKL082C	0.772678	0.023566	0.0676152
YNL173C	0.651363	0.0237082	0.0679875
YNR049C	0.65544	0.0237843	0.0681701
YGL242C	0.535142	0.0240134	0.0687547
YGL073W	0.598588	0.024005	0.0687547
YOR153W	0.590941	0.0240795	0.0689081
YDL007W	0.523647	0.0242276	0.0692957
YDR118W	-0.635483	0.0242416	0.0692995
YBL018C	0.793374	0.0244051	0.0697306
YER089C	-0.614962	0.0247198	0.0704847
YKL108W	0.830826	0.0247155	0.0704847
YLR362W	0.562723	0.0247204	0.0704847
YNL146W	1.7069	0.0246939	0.0704847
YNL156C	0.573201	0.0247553	0.0705474
YER180C	2.5401	0.0248081	0.0706546
YPR022C	-0.581276	0.0248187	0.0706546
YBL006C	-0.729932	0.0248932	0.0708301
YGL131C	-0.753901	0.0249217	0.0708743
YLR178C	0.654067	0.024988	0.0710262
YNL273W	-0.583444	0.0250445	0.0711498
YKR071C	0.595371	0.0250581	0.0711516
YKL009W	0.68105	0.0252151	0.0715601
YMR219W	0.58697	0.025288	0.0717301
YPL239W	0.568563	0.0253173	0.0717761
YBR260C	0.529591	0.0253482	0.0718265
YFR032C-A	0.592312	0.0253681	0.0718457
YPR191W	0.534458	0.0254869	0.072145
YGR179C	0.767982	0.0255422	0.0722553
YNL265C	0.580011	0.0255522	0.0722553
YOL086C	0.765492	0.0255658	0.0722564
YDR530C	-0.686819	0.0256065	0.0723341
YOR100C	1.5312	0.0257662	0.0727103
YPR199C	-0.719638	0.0257626	0.0727103
YPL167C	0.925472	0.0257795	0.0727105
YKR099W	-0.730961	0.0258488	0.0728685
YIL159W	0.646977	0.0258864	0.0729368
YOR305W	0.806076	0.0259137	0.0729763
YMR212C	-0.627439	0.0259406	0.0730146
YKL091C	0.627198	0.025998	0.0731385
YHL023C	-0.624256	0.0261537	0.073486
YHR012W	0.538053	0.0261405	0.073486
YOL080C	1.03739	0.0261617	0.073486
YJR063W	0.672562	0.0263049	0.0738125
YOL088C	-0.582797	0.0262987	0.0738125
YOR363C	0.659512	0.0264112	0.0740349
YOR390W	-0.728858	0.0264107	0.0740349
YLR420W	0.541502	0.0265184	0.0742703
YOR090C	-0.588997	0.0265222	0.0742703
YJR134C	0.586048	0.0266014	0.074454
YHL008C	-0.667385	0.0267251	0.0747066
YLR368W	-0.69666	0.0267325	0.0747066
YPR072W	0.642781	0.0267293	0.0747066
YOR216C	0.607321	0.0267723	0.0747797
YJL051W	-0.610629	0.0268372	0.0749228
YLR151C	0.834212	0.0268971	0.0750517
YOL129W	0.509572	0.0271656	0.0757505
YPR071W	-0.924438	0.0271751	0.0757505
YPL173W	0.686303	0.0271945	0.0757658
YNR014W	0.893009	0.027236	0.075843
YDR183W	0.788191	0.0273746	0.0761903
YPL024W	-0.779916	0.0275119	0.0765337
YBR237W	0.73344	0.0275759	0.0766726
YLR143W	0.604343	0.0276551	0.076854
YDR244W	0.59442	0.0276887	0.0768845
YDR367W	-0.622865	0.0276941	0.0768845
YKL033W-A	-0.593257	0.0277374	0.0769657
YER170W	0.728164	0.0278729	0.0773026
YDL205C	-0.575062	0.0279002	0.077308
YOR172W	-0.721713	0.0279031	0.077308
YDL036C	0.674666	0.0279439	0.077382
YJR010C-A	0.659759	0.0280942	0.077759
YNR056C	3.30064	0.0281257	0.0777876
YNL193W	-0.627534	0.0281329	0.0777876
YBR295W	0.736699	0.0281881	0.077823
YER006W	0.671023	0.0281668	0.077823
YIL158W	0.726843	0.0281883	0.077823
YIL128W	-0.597698	0.0282279	0.0778932
YDR032C	0.521229	0.0282581	0.0779373
YDR240C	0.696807	0.0283617	0.0781836
YCR094W	-0.594836	0.0284311	0.0783295
YLR401C	0.681456	0.0284432	0.0783295
YGR237C	0.58784	0.0284932	0.0784279
YDR164C	-0.572422	0.0285902	0.0786552
YOR129C	-0.71851	0.028633	0.0787337
YNL092W	-0.839277	0.0287016	0.0788556
YOR005C	-0.668219	0.0287061	0.0788556
YPL116W	-0.525006	0.0287683	0.0789869
YFL002C	-0.597942	0.0288227	0.0790657
YLR047C	-0.786932	0.0288259	0.0790657
[truncated: 3,484 more rows]

## Sheet: tma double deletion
Gene_ID	TE changes (log2FoldChange tma∆∆ vs WT1)	pvalue	FDR (padj)
YPR146C	5.65965	0.000241618	0.00820396
YEL033W	3.38988	0.000840848	0.0157697
YCR024C-B	3.08786	9.67275e-05	0.0054141
YDR133C	2.34961	6.2339e-16	1.61926e-12
YJR108W	2.25517	0.000955132	0.0172289
YEL059C-A	1.64794	0.00106879	0.0184464
YMR276W	1.47566	3.74012e-07	0.000114294
YKL086W	1.46948	0.00260191	0.0315079
YLR438C-A	1.4566	7.21216e-07	0.000197196
YGR169C-A	1.4064	1.00962e-05	0.00127926
YNL015W	1.3798	1.53415e-08	8.85545e-06
YER146W	1.3329	2.45568e-07	8.50484e-05
YLL018C-A	1.32288	3.9114e-05	0.00293621
YER018C	1.30777	6.2552e-05	0.00401182
YMR251W-A	1.30222	7.8843e-10	8.19179e-07
YPL189C-A	1.27857	3.95639e-05	0.00293621
YAL013W	1.21464	0.0001336	0.00625271
YBL071W-A	1.20009	0.000269005	0.00862642
YCR088W	1.19989	1.97365e-06	0.000427213
YMR194W	1.19797	0.000146228	0.00640051
YLR264W	1.19488	0.000105258	0.0054141
YER034W	1.1946	0.000440021	0.0114296
YOL052C-A	1.18181	7.86011e-06	0.00106872
YFL014W	1.17665	5.27502e-06	0.000830416
YPL127C	1.16875	1.79931e-06	0.00040641
YLR437C	1.13685	0.000149147	0.00640051
YGL122C	1.13385	3.58528e-06	0.00060944
YHR033W	1.13123	0.00234892	0.0291929
YNL208W	1.12743	3.16815e-06	0.00060944
YPL055C	1.12418	3.14871e-05	0.00268157
YPL230W	1.12249	0.000329697	0.00984354
YLR074C	1.12182	0.000191907	0.00707063
YKL156W	1.11544	4.51857e-08	1.95616e-05
YOL109W	1.11455	5.92457e-05	0.00384727
YJL136C	1.11322	1.4184e-05	0.00151863
YKL204W	1.113	2.37327e-06	0.000474198
YFR034C	1.11238	0.000646379	0.0137059
YNL300W	1.1085	5.33771e-05	0.0036486
YFR017C	1.10829	0.000315471	0.00956807
YER079W	1.10415	3.70816e-05	0.00293621
YMR002W	1.10338	2.24275e-05	0.00219831
YER035W	1.07428	3.74256e-05	0.00293621
YDR524C-B	1.07411	5.66294e-06	0.000840542
YPL249C-A	1.0669	0.000154957	0.00640051
YDR378C	1.06524	4.30005e-05	0.00310261
YKR092C	1.06362	0.000405169	0.0109692
YJR060W	1.06307	8.24181e-05	0.00491669
YNR014W	1.06286	0.00021181	0.00756649
YLR337C	1.05878	1.97327e-05	0.00197137
YIR018W	1.0486	0.00373313	0.0396564
YGL237C	1.04722	0.00058987	0.0132023
YBL059C-A	1.04682	0.00306799	0.0353397
YDL085C-A	1.04256	0.00275592	0.032738
YEL039C	1.04108	0.00224791	0.0281395
YFL010C	1.03671	2.83257e-08	1.47152e-05
YEL037C	1.03444	9.46197e-06	0.00122887
YGR206W	1.03268	0.00457626	0.0452982
YNL309W	1.02897	0.000226998	0.00786171
YHR005C-A	1.02793	2.06951e-07	7.67937e-05
YAL039C	1.02689	0.00015939	0.00640051
YCR051W	1.02605	0.000447732	0.011458
YCR063W	1.02265	0.00356347	0.0385671
YPR182W	1.02177	0.00093153	0.0169798
YDL213C	1.01823	0.00113995	0.0191652
YLR150W	1.01606	0.000106584	0.0054141
YBR173C	1.01254	0.000147438	0.00640051
YDL012C	1.00992	0.000143609	0.00640051
YKL032C	1.00519	0.000105554	0.0054141
YPL037C	1.00491	1.42245e-05	0.00151863
YGL189C	1.00393	0.000235715	0.00805619
YJR017C	1.00246	0.000170937	0.006627
YBR016W	1.00228	1.69342e-07	6.76716e-05
YMR142C	1.00095	0.00065292	0.0137653
YDL110C	1.00094	0.000709132	0.014561
YPR133W-A	0.997662	0.00110564	0.0188322
YGR058W	0.994557	0.00101788	0.017945
YBR289W	0.989818	6.00901e-06	0.000867133
YHR193C	0.988831	3.35746e-05	0.00276858
YOR027W	0.978103	0.000123735	0.00600388
YJL159W	0.976324	0.00053221	0.0126289
YBR009C	0.972043	0.00142504	0.0217738
YOR181W	0.971883	0.000371689	0.010537
YGL106W	0.968108	9.99579e-05	0.0054141
YDR493W	0.967422	0.00215376	0.0275727
YML113W	0.966342	0.0042431	0.0436493
YPR183W	0.966086	2.69979e-05	0.00257853
YOR298C-A	0.965723	3.47987e-05	0.00282467
YPL252C	0.965419	0.000126149	0.00600388
YBR108W	0.962417	0.000155742	0.00640051
YNL007C	0.961412	6.90895e-06	0.000970054
YML073C	0.958817	0.000106597	0.0054141
YHR039C-A	0.952603	0.00063054	0.013496
YMR144W	0.950759	0.000612203	0.0134763
YOR052C	0.949733	2.72992e-05	0.00257853
YCL028W	0.949496	5.94699e-07	0.000171637
YDL082W	0.948819	0.000428663	0.0113041
YOL040C	0.946332	0.000397049	0.0108561
YNR037C	0.946332	0.00038637	0.0106788
YIL138C	0.94615	0.00106121	0.0183766
YJR048W	0.943064	0.000246802	0.00827184
YNL185C	0.942627	0.000413853	0.0109692
YDL067C	0.938893	0.00160285	0.0233899
YLR079W	0.934007	0.000828365	0.0157572
YDL087C	0.931203	0.00475688	0.0467145
YJL133C-A	0.927024	0.000761926	0.0151655
YML027W	0.924141	0.000343565	0.0100271
YDR025W	0.923966	3.59999e-06	0.00060944
YBR048W	0.923711	3.05454e-05	0.00266847
YEL044W	0.919834	0.00054187	0.0127376
YER064C	0.914551	0.000184045	0.00692837
YBR089C-A	0.911239	0.000793966	0.0154168
YGL031C	0.911118	0.000470057	0.0117968
YDL181W	0.908469	0.00117274	0.0194646
YDR525W-A	0.908406	0.00174208	0.0245141
YLR439W	0.907414	0.000349478	0.0101205
YER165W	0.905367	9.60471e-05	0.0054141
YGR148C	0.899553	0.00108388	0.0185625
YAL012W	0.892334	0.00361178	0.038767
YPL081W	0.891318	0.00108624	0.0185625
YNR022C	0.891234	0.00184787	0.0253387
YCL057C-A	0.890642	0.000221521	0.00774703
YGL035C	0.889949	0.000163863	0.00640051
YLR388W	0.887261	0.004984	0.047683
YBL029C-A	0.886907	0.00290926	0.0341435
YNL310C	0.883494	0.00194683	0.0258664
YER131W	0.881279	0.000261942	0.00855841
YBR162W-A	0.878417	0.00117887	0.019504
YDL136W	0.877875	0.00169724	0.0241897
YBR268W	0.877697	0.000646209	0.0137059
YDL191W	0.876192	0.00167895	0.0241897
YOL005C	0.875772	0.00107838	0.0185502
YKL109W	0.873684	9.29766e-05	0.00536681
YDL150W	0.872255	0.0032998	0.0367077
YOL067C	0.87208	0.00335997	0.0372176
YMR255W	0.870499	0.00456789	0.0452982
YHR021C	0.865171	1.11477e-05	0.00134679
YHR087W	0.864173	2.88125e-05	0.00265444
YIL069C	0.861421	0.000157277	0.00640051
YJL079C	0.85826	0.000631286	0.013496
YER067W	0.857676	0.000261427	0.00855841
YLR192C	0.85742	0.00209725	0.0271025
YER074W	0.855535	0.000199972	0.00731587
YLR448W	0.855046	0.000475799	0.0118779
YCR076C	0.855037	0.000265684	0.00857284
YKR057W	0.854539	0.000369914	0.010537
YLR178C	0.854494	4.48083e-06	0.000727435
YOR096W	0.853736	0.00121715	0.0198216
YPR129W	0.850784	0.000159557	0.00640051
YDR226W	0.850142	3.08196e-05	0.00266847
YBL032W	0.849146	0.00021917	0.00774549
YOR182C	0.847656	0.00493529	0.0474794
YIR003W	0.84641	0.0033353	0.0370232
YMR240C	0.846297	0.00453092	0.0452656
YBR071W	0.845144	0.00469078	0.0462402
YOR276W	0.844047	0.000477859	0.0118779
YJL083W	0.843959	0.003112	0.0355315
YKR062W	0.843628	0.00155961	0.0228874
YDR002W	0.843451	0.000318629	0.00956807
YLR221C	0.8433	0.00235548	0.0292045
YJL189W	0.837947	0.00343179	0.0375329
YMR161W	0.837902	0.000259484	0.00855841
YGR034W	0.836641	0.000782328	0.0154168
YML081C-A	0.836442	0.000679051	0.0141107
YDR224C	0.836348	0.00220395	0.0277901
YDR381W	0.834473	0.000299039	0.00930244
YFR049W	0.833568	0.00190189	0.0256062
YOR327C	0.83341	0.00482065	0.0468975
YER120W	0.830325	1.9436e-05	0.00197137
YDL061C	0.827539	0.000546645	0.0127387
YBR269C	0.827438	0.000699494	0.0144369
YHL034C	0.827267	0.000907738	0.0167223
YFR032C-A	0.826713	0.00124717	0.0200535
YOR020C	0.824957	0.000665861	0.0139482
YHL031C	0.820856	0.00128848	0.0204446
YMR153W	0.819682	0.000212648	0.00756649
YLR367W	0.819292	0.000384862	0.0106788
YBR101C	0.816366	0.000444464	0.0114306
YPR052C	0.815768	3.63669e-06	0.00060944
YCR046C	0.808378	0.000607838	0.0134371
YLR344W	0.807589	0.000941476	0.0170417
YGR285C	0.805939	0.00186903	0.0254121
YMR070W	0.805175	0.000529012	0.0126289
YIL065C	0.80302	0.000930569	0.0169798
YKR094C	0.802624	2.91248e-05	0.00265444
YKL085W	0.801597	0.000136769	0.00628776
YML024W	0.799994	0.000178957	0.00683589
YBL092W	0.799926	0.000155667	0.00640051
YAL003W	0.797331	0.00104542	0.0182247
YLR287C-A	0.795945	0.000791991	0.0154168
YKL087C	0.795555	0.00172099	0.0244013
YIR006C	0.793528	0.000589967	0.0132023
YGR079W	0.793393	0.000991067	0.0176928
YIL101C	0.787862	0.00119306	0.0196137
YLR429W	0.787332	0.000105725	0.0054141
YOL121C	0.786465	0.000107226	0.0054141
YDR485C	0.78622	0.00123594	0.0199401
YNL113W	0.784652	0.000332481	0.00986095
YHR200W	0.78322	4.82363e-05	0.00334117
YMR038C	0.782257	0.00121394	0.0198216
YIL154C	0.782249	0.00421848	0.0435209
YCL009C	0.781898	0.00202265	0.0266017
YER102W	0.781171	0.000488309	0.0120122
YBR031W	0.779414	0.000334076	0.00986095
YJR074W	0.778348	0.00030305	0.00937109
YNL096C	0.777739	0.00204269	0.0266285
YDR012W	0.777013	0.000386453	0.0106788
YPL090C	0.775512	0.00212814	0.0273656
YIL135C	0.769501	0.00199961	0.0264325
YER063W	0.767788	0.00246672	0.030152
YDL053C	0.766997	0.000816785	0.0156
YDR429C	0.765196	0.000107344	0.0054141
YNL308C	0.765145	0.00491893	0.0474794
YGL147C	0.76478	0.000123075	0.00600388
YJR104C	0.762752	2.10546e-06	0.000437514
YEL017W	0.76115	0.00194335	0.0258664
YMR121C	0.759379	0.00155835	0.0228874
YOR198C	0.757376	0.00268158	0.0321728
YNR046W	0.757286	0.000442261	0.0114306
YMR136W	0.75714	0.000209867	0.00756649
YOR271C	0.755575	0.00218907	0.0276696
YBL072C	0.754376	0.000547474	0.0127387
YDR451C	0.753042	0.002434	0.0298222
YGL105W	0.751827	0.000160089	0.00640051
YBR181C	0.751521	0.00269864	0.0322702
YGR130C	0.750959	0.0029242	0.0342145
YDL226C	0.747478	0.000181748	0.00689183
YGL209W	0.744194	0.00223885	0.0280938
YIL148W	0.742613	0.000149943	0.00640051
YOR332W	0.742259	0.00270992	0.0322891
YBL027W	0.742184	0.00427418	0.0436938
YBR261C	0.741187	0.00311064	0.0355315
YIL051C	0.741171	0.00149672	0.0224026
YIL106W	0.739305	0.000619897	0.013496
YGL187C	0.738816	0.000282407	0.00889155
YLR038C	0.738761	0.00105278	0.0182916
YLR061W	0.738063	0.000562155	0.0127528
YDR328C	0.737515	0.0007523	0.0150315
YCR012W	0.736968	0.000246557	0.00827184
YLR167W	0.73662	0.000559807	0.0127528
YJL020C	0.735176	0.00338616	0.0373485
YEL034W	0.734111	0.00436587	0.0441457
YOR167C	0.731716	0.000118768	0.00587618
YNL135C	0.731025	1.34574e-05	0.00151863
YEL054C	0.728688	3.95412e-05	0.00293621
YKR048C	0.728564	0.000579811	0.0130962
YMR122W-A	0.727852	0.00115442	0.0192837
YLR406C	0.726482	0.000488677	0.0120122
YCR077C	0.72639	0.000142474	0.00640051
YOL039W	0.725705	0.00100326	0.0177882
YBR084C-A	0.725056	0.00428545	0.0436938
YDR077W	0.724965	0.000285515	0.00893524
YNR017W	0.724532	0.000654483	0.0137653
YER056C-A	0.724329	0.00266051	0.032068
YJL158C	0.72331	0.00181521	0.0251467
YMR295C	0.723235	0.00270212	0.0322702
YPL198W	0.722827	0.000338799	0.00994385
YOL111C	0.721415	0.00179178	0.0249552
YNL255C	0.719357	0.000837147	0.0157572
YPL079W	0.718123	0.000151246	0.00640051
YNL281W	0.716989	0.00141035	0.0216768
YGL076C	0.715769	0.000370545	0.010537
YKL054C	0.715735	0.00184872	0.0253387
YGR118W	0.715351	0.000878493	0.0162412
YNL078W	0.713753	0.0052467	0.0495574
YBL058W	0.713289	0.00341182	0.0374755
YKL164C	0.711399	0.000556627	0.0127387
YDL075W	0.711167	0.003275	0.0365937
YLR170C	0.710373	0.00455363	0.0452982
YER027C	0.709623	0.00136575	0.0212427
YBR189W	0.708556	0.00178962	0.0249552
YOR122C	0.708282	0.000541223	0.0127376
YNL131W	0.706677	0.00104292	0.0182247
YLR109W	0.70622	0.00138474	0.0213464
YPL098C	0.705923	0.00457778	0.0452982
YAL005C	0.705893	0.00172549	0.0244013
YLL045C	0.705207	0.000834702	0.0157572
YGR167W	0.705133	0.00217391	0.0276696
YLR019W	0.704953	0.00180119	0.0250192
YPR163C	0.703076	0.00169905	0.0241897
YKL192C	0.697688	0.00157344	0.0230255
YDR098C	0.696978	0.000409145	0.0109692
YDR447C	0.693255	0.00218352	0.0276696
YNL302C	0.693012	8.39188e-05	0.00491669
YPR065W	0.692519	0.000995217	0.017706
YMR183C	0.692466	0.000316856	0.00956807
YLR340W	0.688805	0.00480694	0.0468975
YPR132W	0.688714	0.000491576	0.0120122
YER088C	0.688168	0.00347853	0.0379536
YGR078C	0.687363	0.00125069	0.0200535
YLL018C	0.686643	0.00133921	0.0209726
YJL190C	0.686324	0.00282939	0.0334822
YHL033C	0.685444	0.00150089	0.0224026
YHR008C	0.683947	0.0006293	0.013496
YGL181W	0.682125	0.00129476	0.0204446
YLL024C	0.681954	0.00216017	0.0275727
YPR043W	0.679078	0.00150053	0.0224026
YMR230W	0.678958	0.00374552	0.0396564
YJL041W	0.677195	0.00133991	0.0209726
YBR109C	0.677074	0.000392329	0.0107839
YCR052W	0.675968	0.00253989	0.030901
YDL064W	0.675113	0.00354041	0.0384779
YPR172W	0.674731	0.00400843	0.0417311
YML078W	0.673487	0.000159646	0.00640051
YDL161W	0.672972	0.00348487	0.0379536
YIL010W	0.672222	0.00369308	0.0393954
YOR091W	0.672038	0.00455245	0.0452982
YPL190C	0.671363	0.00398327	0.0415524
YDR382W	0.671144	0.0048573	0.0471657
YJR070C	0.669942	0.000317322	0.00956807
YOR293W	0.669543	9.69698e-05	0.0054141
YDR418W	0.668874	0.000208111	0.00756041
YPL135W	0.667454	0.00357154	0.0385742
YHR174W	0.666199	0.00522406	0.0494335
YKR042W	0.663832	0.0013788	0.0213296
YML010W	0.661721	0.00125458	0.020054
YMR091C	0.661124	0.00222393	0.0279741
YBL007C	0.6571	0.00242311	0.029759
YNL064C	0.653273	0.000532383	0.0126289
YML079W	0.653176	0.00123276	0.0199401
YGL030W	0.652995	0.00211155	0.0272197
YGR009C	0.651012	0.0018501	0.0253387
YHR146W	0.650705	0.00318247	0.0359669
YDL130W	0.650609	0.00191384	0.0256247
YDR276C	0.649711	0.00283845	0.0335131
YPL049C	0.646383	0.00436783	0.0441457
YOR204W	0.646179	0.000729819	0.0147526
YMR016C	0.644323	0.00370239	0.0394137
YDR148C	0.637905	0.00175067	0.0245141
YMR047C	0.637638	0.000873671	0.0162097
YKL152C	0.635848	0.000276778	0.00876745
YNL108C	0.63478	0.00162213	0.023539
YNL067W	0.63124	0.000106528	0.0054141
YIL062C	0.631223	0.00153248	0.0226816
YOR063W	0.629165	0.00318734	0.0359669
YPR053C	0.62488	0.00425619	0.0436938
YOR234C	0.623865	0.000712801	0.0145787
YBR082C	0.62375	0.00045468	0.0115222
YNL071W	0.623251	0.000552899	0.0127387
YDL083C	0.617962	0.00169956	0.0241897
YGL148W	0.614641	0.00236722	0.0292802
YLR259C	0.606342	0.00470874	0.0463293
YLR206W	0.604875	0.00365422	0.0391416
YDR463W	0.604509	0.00297153	0.0346123
YBR085C-A	0.601751	0.00291157	0.0341435
YOL051W	0.599899	0.00187284	0.0254121
YOL123W	0.596307	0.00439624	0.0442606
YJR092W	0.592984	0.0030529	0.0352753
YPR080W	0.590811	0.00127405	0.0203027
YLR357W	0.587922	0.00390319	0.0409638
YLR029C	0.587213	0.00115249	0.0192837
YNL248C	0.586818	0.00437928	0.0441755
YBL087C	0.586287	0.0027602	0.032738
YDL081C	0.586226	0.00187641	0.0254121
YML105C	0.585147	0.00435422	0.0441457
YCL037C	0.585134	0.00119114	0.0196137
YKL056C	0.58131	0.000700309	0.0144369
YBR118W	0.578147	0.0014208	0.021773
YOR098C	0.577223	0.00530637	0.0498615
YPL143W	0.573969	0.00111126	0.018866
YDR086C	0.56641	0.0043339	0.0440599
YDR309C	0.558589	0.00498087	0.047683
YLL039C	0.55243	0.000592503	0.0132023
YML028W	0.551894	0.00165442	0.0239407
YOR065W	0.546957	0.00428948	0.0436938
YDR298C	0.543498	0.00381305	0.04013
YER177W	0.538781	0.00317247	0.0359669
YJR123W	0.526443	0.00528446	0.0498235
YGR085C	0.523156	0.00519119	0.0492121
YLR216C	0.522883	0.00319794	0.0359669
YLR354C	0.519181	0.00187839	0.0254121
YFR031C-A	0.51541	0.00149041	0.0224026
YOL086C	0.510094	0.00356021	0.0385671
YER117W	0.503074	0.00255681	0.0310341
YLR185W	0.501224	0.00408487	0.0422727
YGL123W	0.491541	0.00304513	0.0352753
YNL055C	0.487178	0.00309695	0.0355158
YMR303C	0.484553	0.00327547	0.0365937
YGR209C	0.482497	0.00501203	0.047863
YGL195W	-0.4927	0.00518383	0.0492121
YKL104C	-0.494495	0.00481386	0.0468975
YPL012W	-0.524326	0.00427573	0.0436938
YDR457W	-0.525165	0.004525	0.0452656
YJL109C	-0.531998	0.00218654	0.0276696
YEL022W	-0.550943	0.00443333	0.0445477
YER001W	-0.566735	0.0024142	0.0297199
YNL087W	-0.582029	0.00294603	0.0343925
YOR151C	-0.591756	0.000765779	0.0151841
YBL004W	-0.595111	0.00169828	0.0241897
YOR336W	-0.595157	0.00479288	0.0468908
YJR143C	-0.595762	0.00194206	0.0258664
YMR247C	-0.60334	0.00298226	0.0346596
YOR207C	-0.607503	0.0019572	0.0259379
YGL016W	-0.616243	0.00316192	0.0359435
YBR074W	-0.624175	0.00168908	0.0241897
YDR141C	-0.626557	0.00113101	0.0190766
YPL053C	-0.644569	0.00530768	0.0498615
YLR305C	-0.651185	0.00101901	0.017945
YDR452W	-0.65256	0.000984286	0.0176323
YLR452C	-0.658306	0.00144523	0.0219531
YGR281W	-0.665049	0.00312793	0.035635
YOR067C	-0.670109	0.00476746	0.0467301
YIL030C	-0.686721	0.00287262	0.0338395
YHR045W	-0.687471	0.0046906	0.0462402
YBR199W	-0.688951	0.00381602	0.04013
YLR087C	-0.695589	0.00486773	0.0471788
YKL057C	-0.699074	0.00207532	0.0268859
YNR030W	-0.699434	0.00493019	0.0474794
YGL094C	-0.711578	0.00328528	0.0366246
YOR346W	-0.712832	0.00492828	0.0474794
YCR005C	-0.715568	0.0021586	0.0275727
YPR105C	-0.718353	0.00148083	0.0223632
YPL207W	-0.719222	0.000623597	0.013496
YJR132W	-0.72194	0.00055489	0.0127387
YOR093C	-0.723063	0.00206855	0.0268653
YOR175C	-0.724673	0.000492512	0.0120122
YGL006W	-0.732298	0.00137955	0.0213296
YDR334W	-0.734512	0.00144298	0.0219531
YJL039C	-0.737262	0.000521285	0.0125374
YGL140C	-0.740264	0.00174993	0.0245141
YPL050C	-0.740995	0.00230319	0.0286932
YMR266W	-0.74116	0.000432367	0.0113442
YKL209C	-0.742736	0.000412136	0.0109692
YBR086C	-0.745976	0.000127127	0.00600388
YNL257C	-0.746074	0.00092552	0.0169798
YNL297C	-0.746275	0.0001634	0.00640051
YLR422W	-0.746731	0.00226836	0.0283272
YLR459W	-0.748251	0.00337657	0.0373219
YLR001C	-0.749462	0.00422224	0.0435209
YGR199W	-0.7496	0.001505	0.0224026
YMR171C	-0.757967	0.00083139	0.0157572
YMR176W	-0.760517	0.00391805	0.0410369
YIL085C	-0.764493	0.00202231	0.0266017
YNL329C	-0.767262	0.00375572	0.0396564
YDR038C	-0.768963	5.6964e-05	0.00375021
YCL030C	-0.77079	0.000496596	0.0120552
YMR243C	-0.771033	0.000934787	0.0169798
YDR434W	-0.771933	0.00172852	0.0244013
YJL207C	-0.777086	0.000410597	0.0109692
YCR028C	-0.778063	0.00326879	0.0365937
YHR039C	-0.78347	0.000719052	0.0146489
YIL116W	-0.783623	0.000728155	0.0147526
YFR039C	-0.78392	0.00117088	0.0194646
YEL025C	-0.789389	0.00402691	0.0417918
YDR307W	-0.79114	0.000748991	0.0150232
YLR241W	-0.794449	0.000376711	0.0105785
YPL244C	-0.797539	0.00394434	0.041229
YDR135C	-0.804367	0.00112399	0.0190199
YOR118W	-0.805722	0.0012915	0.0204446
YNL219C	-0.812157	0.00147185	0.0222923
YIL090W	-0.825656	0.00516452	0.0491386
YCR017C	-0.835159	0.000668768	0.0139528
YGL114W	-0.835175	0.00085644	0.0160043
YDL077C	-0.836145	0.000787975	0.0154168
YOR002W	-0.836466	0.000628294	0.013496
YPL265W	-0.836956	0.00161872	0.023539
YDR164C	-0.837527	0.000438971	0.0114296
YKR054C	-0.837917	0.000222196	0.00774703
YJR109C	-0.839512	0.000305456	0.0093896
YLL048C	-0.843016	0.000625841	0.013496
YER005W	-0.850378	0.000795325	0.0154168
YIL088C	-0.852267	0.000737859	0.0148573
YGR184C	-0.85298	5.70292e-05	0.00375021
YDL248W	-0.855685	0.000503032	0.0121547
YOL033W	-0.858448	0.00305561	0.0352753
YKL174C	-0.865014	0.00123443	0.0199401
YPR164W	-0.869316	0.000594676	0.0132023
YPR198W	-0.871197	0.00154239	0.0227634
YFL026W	-0.874855	0.000135585	0.00628776
YGR157W	-0.875919	4.52577e-05	0.00317721
YMR013C	-0.885311	0.00262585	0.0317239
YKL033W	-0.892937	0.00185346	0.0253387
YKL219W	-0.895998	0.000550685	0.0127387
YGR065C	-0.899334	0.000451654	0.0115017
YHR137W	-0.909145	0.00250874	0.0305936
YLR024C	-0.909302	0.000373207	0.010537
YDR456W	-0.917322	8.11047e-05	0.00489929
YOR034C	-0.917648	0.000271553	0.00865473
YOR219C	-0.927131	4.37168e-05	0.00311108
YMR258C	-0.929937	0.000176884	0.00680674
YHR078W	-0.934109	0.00135824	0.0211893
YCL038C	-0.949062	0.000469896	0.0117968
YDR105C	-0.949527	0.000191506	0.00707063
YKR078W	-0.95874	0.00495942	0.0476233
YFR030W	-0.97761	3.34819e-05	0.00276858
YJR137C	-0.98348	3.5713e-06	0.00060944
YJR161C	-0.987748	6.3542e-05	0.00402562
YHR096C	-0.990586	0.000811107	0.0155487
YGL142C	-0.991664	0.000864928	0.016105
YLR214W	-0.996081	0.000806693	0.0155214
YLR152C	-0.997385	0.00203465	0.0266247
YNL326C	-0.999911	0.000975169	0.0175294
YGL257C	-1.00161	7.25971e-05	0.00454388
YLR454W	-1.00621	7.63946e-05	0.00472464
YBR163W	-1.04213	0.00203146	0.0266247
YJR039W	-1.07347	0.00151232	0.0224472
YKR044W	-1.08231	0.00204519	0.0266285
YGR032W	-1.08528	4.20883e-05	0.00307956
YPL092W	-1.10343	0.000112969	0.00564303
YNR059W	-1.11232	0.0031986	0.0359669
YHR077C	-1.11807	9.25044e-07	0.000239789
YER060W	-1.12914	0.00026552	0.00857284
YJL193W	-1.13431	0.000254495	0.008475
YOL058W	-1.13703	0.000187543	0.00700926
YCR021C	-1.14933	0.0037511	0.0396564
YAR071W	-1.15529	0.00121068	0.0198216
YJL088W	-1.16286	1.39667e-05	0.00151863
YLL051C	-1.17247	7.94732e-05	0.00485722
YMR119W	-1.17771	1.4324e-05	0.00151863
YJL139C	-1.17837	0.000153949	0.00640051
YDL238C	-1.18179	0.00103485	0.0181624
YOR377W	-1.21256	0.000161948	0.00640051
YJR061W	-1.25734	0.00240994	0.0297199
YER060W-A	-1.26101	5.58957e-05	0.00375021
YGL136C	-1.27866	0.00267329	0.0321475
YGL117W	-1.29041	0.00451958	0.0452656
YGR004W	-1.29985	1.24158e-06	0.000293182
YDR314C	-1.30552	0.00191341	0.0256247
YER184C	-1.30731	0.00341211	0.0374755
YHR215W	-1.31077	0.000411545	0.0109692
YDR541C	-1.32359	0.000350661	0.0101205
YKR069W	-1.32423	0.000790981	0.0154168
YPL003W	-1.33659	1.04247e-05	0.00128943
YPR030W	-1.34578	0.00514012	0.0489962
YNR055C	-1.34614	2.62978e-07	8.53856e-05
YMR319C	-1.36962	0.0030769	0.035364
YJR010W	-1.37197	8.02315e-06	0.00106872
YPL058C	-1.37309	3.80202e-05	0.00293621
YJL153C	-1.37632	3.01258e-05	0.00266847
YHR204W	-1.38234	9.6931e-07	0.000239789
YNL142W	-1.45176	0.000100589	0.0054141
YHL035C	-1.50944	0.000126402	0.00600388
YMR096W	-1.541	8.4232e-05	0.00491669
YBL075C	-1.56991	0.000233402	0.00802996
YPL088W	-1.57288	0.00134031	0.0209726
YHR129C	-1.61214	1.4316e-05	0.00151863
YHL040C	-1.64148	5.50475e-06	0.000840542
YCR089W	-1.66904	5.27452e-09	3.42514e-06
YHL016C	-1.74607	0.00358595	0.0386038
YOL158C	-1.80914	3.64005e-09	2.70143e-06
YOR010C	-1.81871	0.00403035	0.0417918
YHR139C	-1.82716	0.00342571	0.0375329
YER081W	-1.85362	5.21903e-11	6.77821e-08
YKR061W	-2.17143	1.9341e-05	0.00197137
YER024W	-2.18607	3.20407e-08	1.51319e-05
YJR004C	-2.24606	0.00358915	0.0386038
YBR208C	-2.2551	1.48931e-15	2.57899e-12
YDR118W	-2.4086	1.93352e-09	1.67411e-06
YFR020W	-2.43752	0.000163658	0.00640051
YGL256W	-2.77913	4.02106e-21	2.08894e-17
YGL258W	-2.94889	0.00182244	0.0251798
YHL047C	-3.12267	0.000799118	0.0154328
YLR174W	-3.35211	0.00368793	0.0393954
YOR306C	-4.35658	0.0019026	0.0256062
YBR252W	0.571627	0.00534543	0.0500258
YOR286W	0.678188	0.00534634	0.0500258
YPL216W	-1.15791	0.00535406	0.0500258
YOR312C	0.649057	0.00539282	0.0502975
YGR027C	0.619331	0.0054248	0.0503584
YJR034W	1.0581	0.00542844	0.0503584
YPL149W	-1.05369	0.00541719	0.0503584
YIL018W	0.465628	0.00544739	0.0504442
YER041W	-1.16366	0.0055029	0.0508676
YDR388W	0.558324	0.00553955	0.0511154
YMR259C	-0.555388	0.00555496	0.0511667
YGR037C	0.709626	0.00558295	0.0513335
YER109C	0.892691	0.00560387	0.0513975
YGR008C	0.662071	0.00561959	0.0513975
YJL080C	0.618913	0.00561593	0.0513975
YDR353W	0.533221	0.00570779	0.0519373
YHL015W	0.604675	0.0057086	0.0519373
YPL013C	0.766635	0.00569404	0.0519373
YJR003C	-0.707109	0.00573855	0.0521185
YCL050C	0.539938	0.0057817	0.0524188
YEL020W-A	0.761516	0.00579891	0.0524638
YKL205W	-0.616516	0.00580687	0.0524638
YGL184C	-1.04618	0.00595156	0.0536777
YMR189W	-0.523275	0.00601308	0.0541386
YGR181W	0.813084	0.0060514	0.0542678
YLR436C	-0.625626	0.00606922	0.0542678
YLR394W	3.09257	0.00606114	0.0542678
YOL127W	0.698606	0.00604702	0.0542678
YCL044C	0.794043	0.00609272	0.0542911
YNL016W	0.477099	0.00609223	0.0542911
YOL135C	0.805594	0.00612533	0.0544882
YKR072C	0.677763	0.00615366	0.0546466
YDR064W	0.736996	0.0062037	0.0548099
YHR186C	-0.573662	0.00620096	0.0548099
YNL014W	-0.72637	0.00619721	0.0548099
YLR325C	0.705771	0.0062447	0.0550785
YDR172W	0.506314	0.00629966	0.0553752
YNL072W	0.749715	0.00629026	0.0553752
YNL157W	0.724196	0.0063577	0.055791
YDR450W	0.490974	0.00641343	0.0561851
YOL062C	-0.703992	0.00657299	0.057486
YOR192C	-1.52542	0.00662278	0.0578241
YLR179C	0.490884	0.00668389	0.057968
YLR361C-A	0.952834	0.0066735	0.057968
YMR031C	0.673134	0.00667715	0.057968
YNL301C	0.578897	0.00665104	0.057968
YHR047C	-0.583519	0.00673962	0.0582946
YKR090W	0.691394	0.00674399	0.0582946
YAR002W	0.646893	0.0068391	0.0589206
YCR073W-A	0.697067	0.00683087	0.0589206
YKL185W	0.542624	0.00689989	0.0590773
YKL117W	0.482972	0.00687954	0.0590773
YLR177W	0.620127	0.0069079	0.0590773
YNR044W	-0.648687	0.00691414	0.0590773
YOR006C	0.653295	0.00690686	0.0590773
YLR294C	3.07031	0.00696285	0.0593958
YJL062W-A	0.663436	0.00701401	0.0596773
YNL280C	-0.646577	0.00701883	0.0596773
YBL002W	0.523723	0.00709071	0.0601899
YML026C	0.439014	0.00713253	0.0604462
YBL021C	0.875036	0.00718009	0.0606514
YGR203W	0.923651	0.00717665	0.0606514
YHL017W	-0.632472	0.00723197	0.0608916
YOR137C	-1.08993	0.00722105	0.0608916
YBR049C	0.63213	0.00732646	0.0614879
YBR039W	0.521324	0.00731544	0.0614879
YGR171C	-0.905608	0.00733937	0.0614968
YGL252C	-0.569093	0.0073584	0.061557
YAR031W	-0.910096	0.00741806	0.0618935
YBR230C	0.504325	0.00743163	0.0618935
YPL220W	0.641857	0.00743437	0.0618935
YDR461C-A	0.808029	0.00748478	0.0621696
YIL109C	0.503183	0.00749147	0.0621696
YPL170W	0.688206	0.00750481	0.062181
YIL033C	0.611657	0.00753432	0.0623261
YBR010W	0.450766	0.00755902	0.062431
YNL289W	0.507102	0.00758193	0.0625209
YCL043C	0.627941	0.00765699	0.0626222
YCL033C	0.594198	0.00767186	0.0626222
YCR008W	0.551413	0.00761587	0.0626222
YDR227W	0.671346	0.00764842	0.0626222
YDR363W-A	0.672587	0.00765178	0.0626222
YGL251C	-1.32446	0.00762829	0.0626222
YJR066W	-0.559101	0.00767861	0.0626222
YLR333C	0.536627	0.00769232	0.0626357
YLR390W-A	0.627554	0.00779963	0.0634101
YJL046W	-0.927963	0.00784802	0.0637039
YIL052C	0.574767	0.00789051	0.0639489
YML103C	-0.511509	0.00791332	0.0640338
YOR265W	0.777111	0.00797752	0.0644529
YIL015W	-0.60114	0.00803175	0.0647458
YMR260C	0.62711	0.00803869	0.0647458
YGR159C	0.565109	0.00815148	0.0655525
YLR219W	0.560717	0.00817325	0.065626
YOL055C	-0.737923	0.00818715	0.0656362
YGL135W	0.633607	0.00830998	0.0665183
YMR086W	0.605658	0.00833147	0.0665877
YEL026W	0.553263	0.00837816	0.066858
YLR438W	0.80537	0.00839621	0.0668993
YHR010W	0.553367	0.00842978	0.0669613
YNR054C	0.660758	0.00842973	0.0669613
YCR038C	-0.996305	0.0084791	0.0672502
YCR065W	0.554469	0.0085072	0.0672799
YPL272C	-3.09522	0.00850874	0.0672799
YGR230W	0.958536	0.00858596	0.0677873
YLR395C	0.544544	0.00868699	0.0684809
YHR044C	-0.788256	0.00871746	0.068617
YKR053C	-1.43296	0.00880639	0.0692121
YOR275C	-0.697092	0.00882535	0.0692564
YJL176C	0.556882	0.00884553	0.06931
YAL030W	0.632214	0.00886085	0.0693255
YDL198C	-0.612957	0.00895039	0.0697819
YIL093C	0.662235	0.00895948	0.0697819
YLR094C	0.719961	0.00894167	0.0697819
YLR293C	0.540212	0.00897765	0.0698187
YBR267W	0.739173	0.00902571	0.0700875
YAL035W	0.595654	0.00921938	0.0707418
YGL222C	0.725433	0.00917618	0.0707418
YHR089C	0.485296	0.00918832	0.0707418
YJL076W	0.520724	0.00916226	0.0707418
YLR384C	-0.447734	0.00923252	0.0707418
YLR186W	0.53756	0.00920687	0.0707418
YML094W	0.68619	0.00920041	0.0707418
YPR102C	0.494463	0.0091775	0.0707418
YPL061W	0.499032	0.00920898	0.0707418
YGL087C	0.720391	0.00927035	0.0709271
YLL015W	-0.601702	0.00929678	0.0710247
YER095W	0.532618	0.00933751	0.0712311
YER057C	0.503689	0.00935358	0.0712491
YKL178C	-1.59431	0.00938015	0.0713469
YNL008C	-0.757466	0.00940176	0.0714066
YIL038C	0.475016	0.00942342	0.0714667
YKL195W	0.476558	0.00944624	0.0715353
YDL004W	0.563502	0.00946916	0.071563
YMR213W	0.77684	0.00947745	0.071563
YHR097C	0.655265	0.00950671	0.0715759
YLR043C	0.46459	0.00949666	0.0715759
YAL029C	-0.511615	0.00953629	0.0716947
YHL048W	-0.761787	0.00955504	0.0717318
YDR210W	0.636829	0.00963332	0.0722152
YCR044C	-0.669374	0.00970886	0.072572
YDR371W	-0.761688	0.00970669	0.072572
YGL127C	0.688539	0.0097789	0.0729905
YLR044C	0.537478	0.00983487	0.0733029
YHR019C	0.476755	0.00998155	0.0742896
YDR478W	1.05894	0.0100065	0.0743685
YJL094C	-0.719363	0.0100605	0.0746633
YCR031C	0.439849	0.0100817	0.0747136
YJL177W	0.481311	0.0101504	0.0750091
YOR372C	0.699851	0.0101454	0.0750091
YLL050C	0.467943	0.0102454	0.0756034
YNL153C	0.621648	0.0102814	0.0757123
YOL077W-A	0.72309	0.0102893	0.0757123
YHR058C	0.741663	0.0103135	0.0757828
YBR056W	-0.547689	0.0103445	0.0757963
YKL068W	0.522695	0.0103351	0.0757963
YER069W	-0.60058	0.0103742	0.0758647
YOR004W	0.601881	0.010383	0.0758647
YER048C	0.581037	0.0105067	0.0766605
YNL216W	0.513117	0.0106237	0.0774051
YIL129C	-0.529021	0.0106926	0.0777981
YGR026W	-0.559856	0.0107312	0.077861
YOL002C	-0.593046	0.0107277	0.077861
YBR212W	0.587064	0.0109391	0.0790384
YDR423C	0.67976	0.0109271	0.0790384
YPR154W	0.623768	0.0109286	0.0790384
YDR131C	-0.839894	0.0109861	0.0792678
YBR230W-A	0.788685	0.0110203	0.0793229
YKL165C	-0.591443	0.0110243	0.0793229
YIL061C	0.84927	0.0110491	0.0793918
YDR539W	-0.675127	0.0111266	0.0798376
YLR244C	0.470264	0.0111422	0.0798393
YOR316C	-0.650513	0.0111948	0.0801063
YPR171W	0.680976	0.0112207	0.0801808
YBR042C	-0.593175	0.0112487	0.0802706
YBR011C	0.401812	0.0113316	0.0807512
YDR412W	0.676849	0.011464	0.0815831
YPR041W	0.561621	0.0115102	0.0817994
YDL215C	-0.593839	0.011559	0.0820339
YAL044C	0.510012	0.0115922	0.0821574
YDR225W	0.468078	0.0116773	0.082648
YGR161C	0.82098	0.0117314	0.0828849
YPR091C	-0.498722	0.0117427	0.0828849
YBR214W	0.571778	0.0118219	0.083188
YBR287W	-0.590796	0.0118385	0.083188
YDL208W	0.525095	0.0118497	0.083188
YKL088W	0.611956	0.0118148	0.083188
YDR335W	-0.583951	0.0119756	0.0838868
YOR042W	0.690671	0.0119815	0.0838868
YJL122W	0.782357	0.0120099	0.0839726
YOL081W	-0.584961	0.0120717	0.0842907
YOR071C	-0.677619	0.0120951	0.084341
YHR099W	-0.468931	0.0122173	0.0850792
YER092W	0.619194	0.0123064	0.085385
YGL242C	0.524038	0.0123106	0.085385
YKL060C	0.439709	0.0122804	0.085385
YOR059C	-0.803785	0.012332	0.0854193
YLR257W	0.661898	0.0123777	0.0856221
YCR011C	-0.532928	0.0124204	0.085803
YNL264C	0.534898	0.0124911	0.0861767
YOR304C-A	1.12272	0.0125377	0.0863838
YBL068W	0.53488	0.012645	0.0867777
YIL014W	-0.604843	0.0126285	0.0867777
YML109W	0.646964	0.0126366	0.0867777
YGL162W	1.02744	0.0126884	0.0869529
YPL089C	0.629645	0.012704	0.0869529
YGR216C	-0.693259	0.0127294	0.0869843
YOL070C	0.574561	0.0127421	0.0869843
YDR528W	0.697628	0.012786	0.0870552
YML011C	-0.883511	0.0127785	0.0870552
YGR086C	0.456259	0.0128153	0.0871404
YDL014W	0.505603	0.0129085	0.0874367
YFL007W	-0.493811	0.0129059	0.0874367
YJR125C	0.481459	0.0129093	0.0874367
YBL099W	0.485172	0.0130039	0.0879625
YBR145W	-0.894252	0.0130686	0.0881709
YKL201C	-0.598748	0.0130547	0.0881709
YGR214W	0.435416	0.0130956	0.0882379
YKL016C	0.57626	0.0131439	0.0884492
YGL084C	-0.588443	0.0131709	0.0885158
YDR192C	0.738165	0.0132098	0.0885481
YGL014W	0.481393	0.013208	0.0885481
YNL031C	0.424233	0.0132569	0.0887493
YLR290C	-0.643669	0.0133662	0.0893661
YFL022C	0.546829	0.0134406	0.0897009
YMR242C	0.59627	0.0134508	0.0897009
YHR141C	0.635083	0.013539	0.0901731
YDR160W	-0.883657	0.0136084	0.0905192
YBR231C	0.762136	0.0136498	0.0905626
YEL016C	-0.818538	0.0136444	0.0905626
YOR321W	-0.613078	0.013742	0.0910584
YNL312W	0.467111	0.0139269	0.0921656
YDR245W	-0.525121	0.0139533	0.0922229
YEL013W	-0.470622	0.0141267	0.0932506
YDL112W	-0.478629	0.0141509	0.0932916
YDR214W	0.520951	0.0142321	0.0937079
YDL093W	-0.606702	0.0142661	0.0938131
YJR126C	-0.531314	0.0143482	0.0939961
YML050W	-1.0786	0.0143137	0.0939961
YNL162W	0.61853	0.0143349	0.0939961
YDR113C	0.664579	0.0144305	0.0942974
YOL115W	0.569329	0.0144189	0.0942974
YLL009C	0.876966	0.0145074	0.0943254
YMR088C	-0.699181	0.0144933	0.0943254
YMR207C	-0.651717	0.0144855	0.0943254
YPL034W	-1.466	0.0144791	0.0943254
YOR223W	0.732371	0.0145927	0.0947611
YBR229C	-0.515558	0.014699	0.095095
YJL209W	-0.850278	0.0146713	0.095095
YOL059W	0.510926	0.014695	0.095095
YGR162W	0.533515	0.0147426	0.0952584
YKL042W	0.662571	0.0147758	0.0953542
YPL004C	0.407174	0.0148065	0.0954338
YCL035C	0.553533	0.0148425	0.0954739
YLR355C	0.570754	0.0148495	0.0954739
YDR462W	0.607795	0.0149773	0.095793
YER156C	0.44653	0.0149913	0.095793
YGL066W	0.544787	0.0149657	0.095793
YGR090W	-0.44267	0.0149897	0.095793
YPL036W	-0.651839	0.0149492	0.095793
YMR301C	-0.600038	0.0150817	0.0962522
YDR153C	0.485324	0.0151146	0.0963438
YOL155C	0.638482	0.015139	0.0963815
YBR091C	0.69394	0.015231	0.0966121
YGL067W	-0.604729	0.0152141	0.0966121
YLR034C	-0.632193	0.0151983	0.0966121
YFL017W-A	0.862496	0.0155176	0.0983097
YBR041W	-0.574015	0.0158071	0.0994027
YGL050W	-0.68937	0.0158139	0.0994027
YHR018C	-0.548795	0.0158008	0.0994027
YIL008W	0.695773	0.0158053	0.0994027
YKL142W	0.530718	0.0158241	0.0994027
YML058W	0.499322	0.0157713	0.0994027
YOR239W	0.537536	0.0157169	0.0994027
YGR122C-A	3.52975	0.0159169	0.0998651
YFL034C-A	0.597672	0.0160485	0.100464
YNL238W	-0.608239	0.0160704	0.100464
YPL270W	-0.532909	0.016057	0.100464
YPL183C	-0.546294	0.0161029	0.100546
YOR270C	-0.46054	0.0161424	0.100672
YIL036W	0.501858	0.0162177	0.101021
YBR249C	0.430707	0.0163288	0.101591
YHR061C	0.855665	0.0164587	0.102032
YHR155W	-0.564338	0.0164579	0.102032
YKL172W	0.789947	0.0164203	0.102032
YAL038W	0.438807	0.0165	0.102166
YCL005W-A	0.527584	0.0165817	0.102533
YJL091C	-0.609296	0.0166184	0.102533
YOR285W	0.493821	0.0166106	0.102533
YGL172W	0.509119	0.0166631	0.102565
YKR082W	-0.459121	0.0166602	0.102565
YMR124W	0.542696	0.0168174	0.103392
YPL183W-A	0.677369	0.0168488	0.103463
YCR007C	-1.09295	0.0169384	0.103837
YDR377W	0.617076	0.0169697	0.103837
YOR249C	-0.789936	0.0169542	0.103837
YOL103W	-0.52939	0.016999	0.103894
YDR232W	0.479836	0.0170606	0.104148
YOR215C	0.580158	0.0171042	0.104292
YMR074C	0.661461	0.0173399	0.105605
YJL144W	0.925692	0.0174468	0.106132
YBR112C	0.473795	0.0176268	0.106976
YFR022W	-0.761095	0.0176176	0.106976
YPL103C	-0.680294	0.0176537	0.107014
YGL043W	0.522059	0.0177974	0.10776
YLR247C	-0.595066	0.0178721	0.10796
YMR219W	0.479557	0.017864	0.10796
YDL166C	0.550325	0.0179109	0.108069
YDR500C	0.494152	0.0180676	0.108443
YHR123W	-0.576729	0.0180774	0.108443
YHR128W	0.440368	0.0180429	0.108443
YLR190W	0.502575	0.0180636	0.108443
YMR034C	-1.14728	0.0180555	0.108443
YDL022W	0.479336	0.0180987	0.108446
YBR233W-A	0.783228	0.018176	0.108784
YBL020W	-0.573223	0.0182842	0.108874
YCR033W	0.544169	0.0183843	0.108874
YDR058C	-0.825115	0.0183566	0.108874
YDR207C	0.656079	0.0182342	0.108874
YDR529C	0.528088	0.0184052	0.108874
YGR233C	-0.578497	0.0184426	0.108874
YHR070W	0.58006	0.0182878	0.108874
YKL024C	0.457939	0.0182869	0.108874
YLR399C	0.510574	0.0184402	0.108874
YLL002W	-0.791141	0.0183995	0.108874
YPL105C	0.526132	0.0184053	0.108874
YPL271W	0.595929	0.018369	0.108874
YKL010C	-0.438847	0.0185681	0.109491
YLR083C	-0.607843	0.0186367	0.109771
YPR008W	0.55434	0.0188234	0.110745
YHL027W	0.52386	0.0188885	0.111002
YOR320C	-0.588434	0.0190147	0.111617
YBR126C	0.537466	0.0192478	0.112477
YGL091C	0.590127	0.0192019	0.112477
YLR075W	0.495148	0.0192464	0.112477
YMR244C-A	0.708124	0.0192053	0.112477
YKR074W	0.616221	0.0193405	0.112683
YLR088W	-0.463865	0.0193307	0.112683
YMR291W	0.524919	0.019348	0.112683
YML063W	0.516343	0.019401	0.112739
YOL013C	-0.70791	0.0194007	0.112739
YLR268W	0.570471	0.0194275	0.112766
YER051W	-0.74867	0.019451	0.112776
YNL116W	0.577499	0.019516	0.1128
YOL140W	-0.612709	0.0194864	0.1128
YPR187W	0.584161	0.0195201	0.1128
YKL160W	0.582849	0.0195636	0.112925
YDL175C	0.652549	0.0196224	0.113139
YPL237W	0.523173	0.0196875	0.113389
YGL166W	0.728921	0.0197222	0.113463
YAL046C	0.564614	0.019775	0.113641
YKL053C-A	0.598257	0.0198551	0.113975
YIL155C	0.504341	0.0198918	0.114059
YJR093C	0.610602	0.0199404	0.114086
YOR383C	-1.38008	0.0199251	0.114086
YGR211W	0.521741	0.0200018	0.114186
YLR418C	0.454905	0.0200012	0.114186
YGR111W	-0.48715	0.02008	0.114507
YLR099W-A	0.770656	0.0201363	0.114576
YNR036C	0.446693	0.0201181	0.114576
YOR054C	0.573701	0.0201945	0.114782
YBR152W	0.982194	0.0202776	0.115128
YDL237W	-0.537531	0.0203892	0.115383
YIR036C	0.504905	0.0203807	0.115383
YPL008W	-0.680537	0.020375	0.115383
YNL056W	-0.632033	0.0204205	0.115435
YER030W	0.768754	0.0204737	0.115484
YLR414C	-0.524269	0.0204533	0.115484
YDL103C	0.437567	0.0204967	0.115489
YBR211C	0.722257	0.0205491	0.115496
YDR370C	-0.738471	0.0205612	0.115496
YGR198W	-0.543537	0.0205941	0.115496
YLR363W-A	1.13406	0.0206092	0.115496
YNR009W	0.588158	0.0205922	0.115496
YCR087C-A	0.749875	0.020726	0.115564
YGL167C	-0.437709	0.0206795	0.115564
YGR076C	0.747727	0.020669	0.115564
YMR271C	-1.03464	0.0207326	0.115564
YPL126W	-0.503069	0.0207008	0.115564
YLR435W	0.714122	0.0209144	0.116453
YGL023C	0.631057	0.0209728	0.116528
YML096W	-0.66637	0.0209534	0.116528
YER154W	0.534157	0.0210994	0.117106
YDR166C	-0.536752	0.0211369	0.117189
YBR021W	-0.609254	0.0211935	0.117253
YDL099W	0.573436	0.0211858	0.117253
YJR045C	0.464083	0.0212213	0.117266
YOR226C	0.533972	0.0212411	0.117266
YDR231C	0.597553	0.0212909	0.117376
YOR140W	0.529107	0.0213062	0.117376
YPL159C	0.737047	0.02137	0.117539
YPR062W	0.450459	0.0213811	0.117539
YFR041C	-0.583981	0.0214706	0.117907
YIL123W	0.594747	0.0215204	0.118056
YJR105W	0.438992	0.0215566	0.118129
YBL093C	0.554499	0.0215876	0.118172
YHR091C	-0.707466	0.02161	0.118172
YCR073C	-1.08905	0.0216711	0.118382
YDR011W	-0.468594	0.0217154	0.118413
YNL052W	0.466781	0.0217224	0.118413
YJL002C	-0.465905	0.0218264	0.11884
YNR002C	-1.53134	0.0218464	0.11884
YJL106W	-3.79824	0.0219191	0.11911
YKL006W	0.511928	0.0219449	0.119126
YBL041W	0.437311	0.0220434	0.119305
YDL138W	-0.776583	0.0220467	0.119305
YJR050W	0.699777	0.0220088	0.119305
YIL044C	0.513122	0.0221499	0.119739
YJL098W	-0.487156	0.0222718	0.120023
YLR110C	0.454622	0.0222379	0.120023
YOR245C	-0.632829	0.0222594	0.120023
YER083C	0.522677	0.0223462	0.120174
YGL103W	0.419913	0.0223293	0.120174
YDL171C	-0.459199	0.0226854	0.121872
YBR111C	0.472189	0.0228004	0.122231
YIL078W	0.410315	0.0228173	0.122231
YNL275W	-0.73238	0.0228227	0.122231
YLR106C	-0.503994	0.0228935	0.122484
YBR140C	-0.477422	0.0229255	0.122529
YDR050C	0.358129	0.0229932	0.122765
YKL046C	-0.543062	0.0231115	0.123269
YBR004C	-0.695474	0.0234273	0.124189
YBR053C	-0.433365	0.0233113	0.124189
YER122C	0.54968	0.0233831	0.124189
YIL068C	-0.556191	0.0233671	0.124189
YMR054W	-0.475975	0.0234259	0.124189
YNL173C	0.588531	0.0234038	0.124189
YLR327C	0.844493	0.0234647	0.12426
YML116W	-0.850814	0.0235083	0.124364
YMR187C	-0.841897	0.0236716	0.125101
YCL029C	0.689545	0.0237102	0.125177
YBR045C	-1.46257	0.0238277	0.12567
YDR239C	0.618132	0.0239912	0.126276
YML030W	0.575188	0.023984	0.126276
YOR066W	0.562468	0.0240173	0.126286
YEL053C	-0.635606	0.0240992	0.126379
YGL191W	0.449207	0.0241325	0.126379
YKL180W	0.490666	0.0241205	0.126379
YPL006W	-0.469747	0.0240686	0.126379
YDR169C	0.523094	0.0242027	0.126492
YJR014W	0.535843	0.0242002	0.126492
YER032W	0.520819	0.0243496	0.127089
YKL038W	0.51933	0.0243904	0.127089
YMR143W	0.429996	0.0243822	0.127089
YKR043C	0.437447	0.02451	0.127585
YOR015W	3.25271	0.0245399	0.127613
YDR288W	-0.659128	0.024582	0.127704
YDL073W	-0.643817	0.0246792	0.128081
YDL051W	0.534285	0.0247383	0.128259
YJL068C	0.466301	0.0248149	0.128528
YFL025C	-0.598885	0.0248965	0.128566
YKR091W	0.717086	0.0248712	0.128566
YPL016W	0.469552	0.0248864	0.128566
YIL127C	0.739101	0.0249496	0.128712
YDR510W	0.503103	0.02512	0.129344
YJL129C	-0.579368	0.0251228	0.129344
YNR010W	0.824983	0.0251467	0.129344
YBL106C	-0.803407	0.0251872	0.129424
YIL136W	0.631878	0.0252361	0.129424
YLR009W	0.668316	0.0252371	0.129424
YNL004W	0.542481	0.0253732	0.129738
YNR034W	0.550518	0.0253663	0.129738
YOR157C	0.408437	0.0253375	0.129738
YAL054C	-1.09506	0.025433	0.129788
YKL100C	-0.508501	0.0254325	0.129788
YLR449W	0.48014	0.0254584	0.12979
YEL066W	0.545351	0.0255675	0.130219
YOR113W	0.579676	0.0257302	0.130919
YGL070C	0.586162	0.0258505	0.131128
YGR263C	-0.668301	0.0258711	0.131128
YLR389C	-0.411242	0.0258723	0.131128
YOR160W	-0.508809	0.0258128	0.131128
YBR043C	-0.678377	0.0260343	0.131598
YDL173W	0.730092	0.0260316	0.131598
YIL139C	-1.07411	0.0260662	0.131598
YJL151C	0.394817	0.0260592	0.131598
YGL059W	-0.733935	0.0261156	0.131629
YGR054W	0.417901	0.0261232	0.131629
YCL002C	-0.776112	0.0261848	0.131757
YDR168W	0.526614	0.0262078	0.131757
YFR008W	0.735964	0.02625	0.131757
YMR222C	0.517641	0.0262449	0.131757
YML031W	-0.527584	0.0263328	0.132045
YPL087W	-0.599091	0.0263759	0.132134
YGL186C	-0.512973	0.0264024	0.132139
YMR221C	-0.540137	0.026466	0.13233
YHR120W	-0.647005	0.0265044	0.132394
YBR283C	-0.484142	0.0265513	0.132501
YGL092W	0.452094	0.0266595	0.132532
YIL147C	-0.508746	0.0266132	0.132532
YML059C	-0.477931	0.0266502	0.132532
YNL024C-A	0.576374	0.0265926	0.132532
YBR200W	-0.547145	0.0267211	0.132585
YEL060C	0.558952	0.026714	0.132585
YJR131W	-0.537716	0.0268189	0.132943
YDL120W	0.529774	0.0268911	0.133174
YHR108W	0.43696	0.0269923	0.133547
YGR150C	-0.642284	0.0271002	0.133851
YJL102W	-0.670347	0.0271052	0.133851
YGR186W	0.460718	0.0272231	0.134179
YJL078C	0.563318	0.0272194	0.134179
YFL045C	0.500478	0.0272536	0.134201
YCL040W	0.468748	0.027483	0.135203
YLR286C	-0.399556	0.0276318	0.135806
YLR375W	0.519049	0.0276896	0.135962
YMR117C	0.936217	0.0279242	0.136954
YMR193W	0.653924	0.0279445	0.136954
YHR074W	-0.445822	0.028024	0.137215
YGR149W	-0.628144	0.0280692	0.137306
YDR028C	0.475427	0.0281443	0.137338
YDL176W	-0.690797	0.0281157	0.137338
YOL119C	-0.581004	0.0281549	0.137338
YJR135W-A	0.645572	0.028219	0.137392
YLR237W	-0.585898	0.0281949	0.137392
YDL001W	0.582933	0.0283195	0.137753
YOR040W	0.762399	0.0283791	0.137914
YOR244W	-0.63381	0.0284652	0.138203
YNL256W	-0.513036	0.0287459	0.139435
YDL146W	-0.651117	0.0287974	0.139555
YNR049C	0.608471	0.0288536	0.139697
YJL166W	0.458866	0.0289889	0.139744
YLR441C	0.383209	0.0290022	0.139744
YML067C	-0.4958	0.0289681	0.139744
YNR065C	-0.734436	0.0290193	0.139744
YPL184C	0.422867	0.0288963	0.139744
YPR036W	0.445657	0.0290248	0.139744
YDL109C	-1.17316	0.0294518	0.140108
YDR364C	-0.635132	0.0295258	0.140108
YDR076W	-1.05971	0.02954	0.140108
YDR299W	0.540383	0.02925	0.140108
YDR395W	-0.414474	0.0292072	0.140108
YER157W	-0.484172	0.0295199	0.140108
YGR173W	0.423723	0.0294234	0.140108
YHL026C	-0.851573	0.0293513	0.140108
YIR037W	0.434555	0.0293102	0.140108
YJR054W	-0.800895	0.0293862	0.140108
YLR204W	0.706668	0.0294868	0.140108
YLR350W	0.469813	0.0293104	0.140108
YML038C	-0.58081	0.029618	0.140108
YNL233W	0.497885	0.0296131	0.140108
YOR145C	0.570214	0.02915	0.140108
YOR342C	-0.55962	0.0295905	0.140108
YOL069W	-0.574763	0.029618	0.140108
YOR389W	-0.719469	0.0292868	0.140108
YPR133C	0.49938	0.0296399	0.140108
YPL232W	0.501308	0.0294841	0.140108
YML093W	0.624536	0.0297422	0.140337
YPL106C	0.426668	0.0297249	0.140337
YOL095C	-0.769162	0.0299329	0.14098
YPR040W	0.568775	0.0299143	0.14098
YJL110C	0.518782	0.0299819	0.141083
YOR355W	0.478824	0.0300538	0.141294
YIL048W	-0.442205	0.0300869	0.141322
YCR084C	0.491377	0.0301389	0.141438
YAL058W	-0.612011	0.0301812	0.14149
YBR122C	0.597256	0.0302318	0.14149
YJL121C	0.597225	0.0302304	0.14149
YBR015C	-0.481962	0.0302675	0.14153
YLR056W	-0.4949	0.030353	0.141802
YNL313C	-0.441736	0.0304359	0.142061
YEL007W	0.42663	0.0304748	0.142116
YDR471W	0.469591	0.0305516	0.142218
YIL002C	-0.534002	0.0305327	0.142218
YBR243C	-0.530255	0.0306759	0.142373
YER158C	0.699708	0.0306585	0.142373
YJR100C	-0.631211	0.0306944	0.142373
YKL014C	-0.454985	0.0306418	0.142373
YOR099W	-0.44899	0.0307571	0.142536
YKR039W	-0.624702	0.0308293	0.142744
YPL166W	0.863049	0.0308646	0.14278
YBR155W	0.598088	0.0309745	0.143097
YDL039C	1.68629	0.0309883	0.143097
YMR263W	0.594387	0.0310242	0.143136
YER050C	0.580354	0.0311762	0.143709
YML049C	-0.47114	0.0313362	0.144319
YDR424C	0.569467	0.031431	0.144611
YJL197W	-0.49222	0.0315109	0.144611
YML129C	0.611353	0.0314997	0.144611
YOL001W	-0.922068	0.0314702	0.144611
YKR010C	0.646289	0.031599	0.144863
YPR021C	-0.55282	0.0316218	0.144863
YLL013C	0.419742	0.0316782	0.144994
YGL225W	-0.482241	0.0317759	0.145313
YFR016C	0.569935	0.0318771	0.145392
YLL031C	-0.535417	0.0318576	0.145392
YOR281C	0.488275	0.0318639	0.145392
YFL016C	0.463321	0.0319297	0.145504
YDR527W	0.555491	0.0320676	0.145867
YGR077C	-0.55297	0.0321049	0.145867
YOR028C	0.589111	0.0320883	0.145867
YOR158W	0.520603	0.0321216	0.145867
YER003C	0.379714	0.0322018	0.146103
YDR511W	0.621985	0.0322802	0.146204
YGL144C	-0.789616	0.0322734	0.146204
YBR215W	0.588019	0.0324506	0.146592
YGR254W	0.556129	0.0324012	0.146592
YNL138W	0.372217	0.0324336	0.146592
YNR067C	-0.420154	0.032511	0.146737
YLR321C	0.494246	0.032555	0.146808
YAL056W	-0.529076	0.0327241	0.147015
YCR004C	0.38162	0.032751	0.147015
YCR071C	0.640088	0.0327988	0.147015
YGR178C	0.410216	0.0327932	0.147015
YIL070C	0.461709	0.032765	0.147015
YMR026C	-0.657292	0.0326783	0.147015
YMR162C	-0.475214	0.032635	0.147015
YGR204W	0.379425	0.0328878	0.147163
YMR021C	0.555079	0.0328886	0.147163
YCL041C	0.644353	0.0330689	0.147335
YGL241W	-0.448024	0.033023	0.147335
YLL038C	0.6895	0.0329965	0.147335
YMR238W	-0.608025	0.0330653	0.147335
YPR191W	0.376619	0.0330226	0.147335
YBL051C	0.473335	0.0332819	0.148129
YMR218C	-0.547192	0.033304	0.148129
YKR036C	-0.592388	0.0333585	0.148244
YGR119C	0.49569	0.0335566	0.148997
YCL026C-B	0.855937	0.033589	0.149013
YDR132C	-0.923515	0.033799	0.149689
YHR006W	0.491556	0.0337976	0.149689
YGL156W	-0.510324	0.0338584	0.149825
YLR047C	-0.767622	0.0339255	0.149994
YDR130C	0.68873	0.0340103	0.150241
YMR049C	0.458743	0.0340696	0.150375
YKR013W	0.451914	0.0342068	0.150852
YBR161W	-0.647458	0.0344057	0.151601
YDL170W	-0.617781	0.0345572	0.151882
YFL027C	-0.626097	0.0345426	0.151882
YHR028C	-0.403857	0.0345507	0.151882
YBR188C	0.688285	0.0346695	0.152118
YKL105C	0.521749	0.034648	0.152118
YDR505C	0.427132	0.0347208	0.152215
YKL091C	0.480777	0.0349857	0.153247
YLR126C	-0.680686	0.035017	0.153255
YMR078C	-0.507147	0.0350471	0.153257
YGR001C	0.450905	0.0351027	0.153371
YNL190W	0.665013	0.0351464	0.153433
YDL097C	0.435599	0.0352851	0.153794
YDL180W	-0.638867	0.0353178	0.153794
YMR313C	-0.529494	0.0352941	0.153794
YGR248W	0.430309	0.0353556	0.153829
YOR231W	0.571156	0.0355259	0.154441
YBR198C	0.435528	0.0355825	0.154558
YIL017C	-0.550065	0.0357013	0.154944
YGL048C	0.429731	0.0358998	0.155552
YJL063C	0.464582	0.0359012	0.155552
YLR335W	0.50531	0.0359753	0.155743
YDR115W	0.695034	0.0361153	0.155892
YGL233W	-0.499065	0.0360678	0.155892
YOL092W	-0.498032	0.0360703	0.155892
YOR328W	-0.792554	0.0361298	0.155892
YGR122W	-0.621851	0.0363296	0.156624
YKL034W	-0.462911	0.0364978	0.157089
YLR342W	-0.484064	0.0364862	0.157089
YER002W	0.655451	0.0366456	0.157334
YLL012W	-0.613612	0.0365935	0.157334
YPL208W	-0.469526	0.0366417	0.157334
YMR311C	1.21161	0.036755	0.157413
YNL074C	0.414047	0.0367401	0.157413
YNR015W	0.59044	0.0367467	0.157413
YGR165W	0.543747	0.036922	0.157868
YML130C	-0.420311	0.0368935	0.157868
YGR172C	0.456934	0.0370995	0.158496
YBL078C	0.674451	0.0372011	0.1588
YDL090C	-0.540275	0.0372719	0.158841
YIL150C	0.672934	0.0372448	0.158841
YLR020C	-0.496088	0.03736	0.159048
YNL243W	0.432812	0.0373815	0.159048
YBL005W	-0.601793	0.0374329	0.159136
YBR183W	-0.640919	0.0375246	0.159395
YBR298C	-2.27513	0.0377149	0.160073
YMR155W	-0.607431	0.037757	0.160121
YDR414C	-0.665604	0.0377939	0.160146
YOL157C	-1.11109	0.0378723	0.160348
YGR215W	0.603372	0.0379274	0.16045
YDL148C	0.495336	0.0381482	0.161122
YPL267W	0.622006	0.0381396	0.161122
YMR186W	0.433549	0.0382102	0.161252
YDR486C	0.511662	0.0382956	0.161482
YDR252W	0.842348	0.0383544	0.16157
YKL203C	-0.411106	0.0383787	0.16157
YBR213W	0.971604	0.0385753	0.161817
YBR293W	-0.82758	0.0385931	0.161817
YCR024C-A	0.527579	0.038587	0.161817
YKL004W	-0.561119	0.0384789	0.161817
YOR254C	-0.40494	0.0385236	0.161817
YLR240W	-0.534251	0.0386711	0.162013
YIR030C	0.953514	0.0391045	0.163434
YKL089W	0.706182	0.0390945	0.163434
YPR029C	-0.421617	0.0390574	0.163434
YOR294W	0.573205	0.0391364	0.163436
YCR020C	-1.59733	0.039193	0.16354
YDR387C	-0.61058	0.0393305	0.163982
YHR050W	-0.432864	0.0397461	0.165204
YIL156W-B	0.507701	0.0396572	0.165204
YLL040C	-0.423863	0.0397506	0.165204
YLR272C	-0.479397	0.0396981	0.165204
YBL076C	-0.373356	0.039819	0.165223
YCR028C-A	0.452915	0.0398107	0.165223
YDR258C	0.412933	0.0399031	0.165375
YDR405W	0.524145	0.0399394	0.165375
YNL069C	0.407451	0.039951	0.165375
YNL237W	-0.706215	0.0400693	0.165622
YNL030W	1.09409	0.0400744	0.165622
YHL001W	0.458754	0.0401179	0.16567
YBL031W	0.732267	0.0402808	0.1661
YDR497C	-0.402917	0.0402861	0.1661
YDR397C	0.535867	0.040431	0.166566
YKL099C	0.621075	0.0406801	0.167459
YBR083W	0.483592	0.0408442	0.167748
YNL183C	0.42904	0.0408472	0.167748
YPL179W	0.43336	0.0408264	0.167748
YKL222C	-0.93893	0.0410377	0.168397
YPL125W	-0.472911	0.0410929	0.168491
YLL006W	-0.512378	0.0414427	0.169791
YLR027C	0.398505	0.0414843	0.169827
YPL228W	0.427264	0.041549	0.169958
YKR045C	0.697827	0.0415951	0.170013
YGR031W	0.496106	0.0416656	0.170034
YLR285W	0.429326	0.0416446	0.170034
YLR138W	-0.42622	0.0417247	0.170141
YGR207C	0.411504	0.0417836	0.170248
YDL130W-A	0.485688	0.0418193	0.17026
YDR266C	0.519376	0.0419783	0.170773
YHR016C	0.390786	0.0421157	0.171126
YPL048W	0.470088	0.0421309	0.171126
YBR017C	-0.398115	0.0422696	0.171555
YDL137W	0.36317	0.0423214	0.171631
YDR107C	-0.552931	0.0424105	0.171858
YGR029W	0.511091	0.0424918	0.172054
YDR330W	0.51818	0.042613	0.172216
YMR292W	-0.563728	0.0426001	0.172216
YOR020W-A	0.687516	0.0426646	0.172216
YPL028W	0.35344	0.0426514	0.172216
YER087C-B	0.493159	0.0429623	0.173213
YPL018W	0.881535	0.0429782	0.173213
YNL115C	-0.485108	0.0430126	0.173218
YPL085W	0.416938	0.043139	0.173592
YBR210W	-0.64202	0.0432231	0.173796
YGL139W	-0.457615	0.0433108	0.173912
YMR314W	0.381932	0.0433191	0.173912
YLR035C	-0.69845	0.0434882	0.174457
YFR037C	0.454612	0.0435322	0.174498
YMR286W	0.724896	0.0436789	0.174951
YDR145W	0.425806	0.0437638	0.174994
YNL291C	-0.492198	0.0437906	0.174994
YOR045W	0.510623	0.04379	0.174994
YDR488C	0.653436	0.0438336	0.175031
YPR139C	-0.48132	0.0439024	0.175171
YMR185W	-0.544206	0.0442377	0.176374
YJR140C	-0.476779	0.0445133	0.177336
YGL121C	-0.649266	0.0446364	0.17769
YDR146C	0.40419	0.0447931	0.177854
YGL027C	-0.405574	0.0447255	0.177854
YHL039W	-0.422912	0.0448141	0.177854
YOR078W	0.665749	0.0448145	0.177854
YHL003C	-0.409037	0.0450761	0.17862
YJR117W	-0.380808	0.0450582	0.17862
YER142C	-0.835527	0.0453544	0.179583
YML013W	0.46191	0.0453883	0.179583
YGR080W	0.430775	0.0454661	0.179754
YNL085W	-0.399163	0.0456376	0.180295
YLR139C	0.576198	0.0460941	0.18196
YDR358W	0.462701	0.0461901	0.182062
YGR227W	-0.567025	0.0461827	0.182062
YML075C	-0.430678	0.0463162	0.182421
YAL002W	-0.518803	0.0464037	0.182469
YDL224C	0.418224	0.0464286	0.182469
YGR279C	0.394409	0.0465042	0.182469
YIR035C	0.40777	0.0464695	0.182469
YPL240C	0.484315	0.0464568	0.182469
YMR304W	-0.373311	0.0465509	0.182515
YCL059C	0.536071	0.0467593	0.183194
YJR019C	0.4988	0.0470528	0.184204
YGR193C	0.382525	0.0471336	0.184382
YHR038W	0.635791	0.0471963	0.184488
YAL021C	0.401437	0.0473318	0.184855
YDR513W	0.475637	0.0473612	0.184855
YAR027W	-0.497411	0.0474428	0.185034
YBR291C	-0.723109	0.0476069	0.185118
YHR023W	-0.405905	0.0475032	0.185118
YJL071W	-0.579571	0.0475911	0.185118
YNL088W	-0.377299	0.0475624	0.185118
YGL212W	0.638677	0.0477122	0.18525
YMR273C	0.477685	0.0476794	0.18525
YDR325W	-0.466015	0.0478406	0.185501
YML023C	-0.699091	0.0478482	0.185501
YGL245W	0.368967	0.0479348	0.185687
YOL113W	-0.662858	0.0479676	0.185687
YIL113W	0.730227	0.0480786	0.185701
YOR189W	0.570729	0.0480786	0.185701
YPL059W	0.475319	0.0480482	0.185701
YNL236W	-0.468764	0.0481481	0.185831
YBR147W	-0.973876	0.0482177	0.185962
YGR041W	0.476215	0.0482676	0.186016
YOR209C	-0.361944	0.0484486	0.186576
YMR060C	-0.543865	0.048485	0.186577
YOR264W	0.436783	0.0485623	0.186736
YER166W	-0.420466	0.0486505	0.186937
YGR106C	-0.39919	0.0489122	0.187527
YGR260W	-0.351735	0.0488989	0.187527
YIR029W	-1.32774	0.04888	0.187527
YBR197C	0.655404	0.049099	0.187966
YDR261C	-0.416748	0.0490731	0.187966
YIR004W	0.495291	0.0492495	0.188403
YBR035C	0.426725	0.049471	0.189111
YML034W	0.503038	0.0495592	0.189309
YJR124C	-0.494762	0.0496756	0.189475
YMR278W	-0.422932	0.0496405	0.189475
YDL128W	-0.40891	0.0497507	0.189622
YIR002C	-0.519439	0.0498806	0.189978
YBR158W	-0.379608	0.0500735	0.190294
YDR362C	-0.545379	0.0500191	0.190294
YJL216C	-2.93605	0.0500507	0.190294
YBL015W	0.476154	0.0504233	0.191023
YER126C	0.50747	0.0503825	0.191023
YKR085C	0.459196	0.0503933	0.191023
YML048W	-0.418814	0.0504493	0.191023
YOL143C	0.380197	0.0503239	0.191023
YDR294C	-0.423247	0.0505941	0.191432
YCR086W	0.656779	0.0508199	0.192088
YJL154C	-0.408596	0.050897	0.192088
YNL025C	-0.719292	0.050903	0.192088
YOR354C	-0.427249	0.0509154	0.192088
YPR023C	0.466006	0.0509804	0.192194
YNR006W	0.489087	0.051059	0.192351
YKL108W	0.642855	0.0511234	0.192453
YGR156W	0.470198	0.0512016	0.192568
YMR039C	0.475768	0.0512279	0.192568
YIL097W	-0.676927	0.0513015	0.192705
YJR013W	-0.513539	0.0514565	0.193148
YCR020W-B	0.863688	0.051542	0.19319
YLR372W	-0.436005	0.0515179	0.19319
YBL035C	0.440941	0.0515878	0.193222
YKL011C	-0.730645	0.0517194	0.193386
YMR194C-B	0.949174	0.0517061	0.193386
YPR140W	-0.568655	0.0517433	0.193386
YIL049W	-0.738075	0.0518444	0.193624
YPR114W	-0.475179	0.0520522	0.194261
YOL009C	-0.709061	0.0522488	0.194715
YOR251C	0.432093	0.0522245	0.194715
YGR251W	0.65938	0.0523104	0.194805
YNR032C-A	0.651325	0.0525043	0.195262
YOR077W	0.678226	0.0525084	0.195262
YNR066C	-0.959216	0.0525775	0.195379
YNR061C	-0.476443	0.0526303	0.195436
YGL032C	-0.488535	0.0527282	0.195659
YJL184W	0.586738	0.0528228	0.19587
YDR277C	0.623999	0.0529312	0.196132
YER105C	-0.387303	0.0531079	0.196647
YOL041C	0.510898	0.0533309	0.197332
YDR062W	-0.4244	0.0537922	0.197911
YDR216W	-0.415179	0.0537692	0.197911
YER056C	-0.440457	0.05369	0.197911
YGL194C	-0.487941	0.0536044	0.197911
YJR051W	-0.404819	0.053663	0.197911
YKR101W	-0.658449	0.0536336	0.197911
YMR309C	-0.331407	0.0535284	0.197911
YNL167C	0.54391	0.0537836	0.197911
YDR221W	-0.404284	0.0541135	0.198391
YGL096W	0.751406	0.0540249	0.198391
YHR145C	1.63678	0.0540974	0.198391
YHR001W-A	0.480076	0.0541059	0.198391
YOR329C	0.453909	0.054043	0.198391
YJR069C	0.400914	0.0541593	0.198419
YBL003C	0.317212	0.0543337	0.198637
YER143W	0.461179	0.0543019	0.198637
YOR360C	-0.443465	0.054283	0.198637
YBR023C	-0.369847	0.054578	0.199257
YJL133W	-0.52143	0.05458	0.199257
YJL097W	-0.431161	0.0547943	0.199899
YLR039C	-0.467645	0.0549222	0.200225
YPL038W	0.634327	0.0550194	0.200439
YEL031W	-0.375689	0.0551688	0.200702
YKR098C	-0.719035	0.0551586	0.200702
YER039C	3.20246	0.0552128	0.200721
YDR507C	0.42141	0.0554356	0.200896
YMR226C	0.341053	0.0554544	0.200896
YNL178W	0.330192	0.05545	0.200896
YNL112W	0.381707	0.0553855	0.200896
YPL219W	0.50454	0.0553564	0.200896
YLL026W	0.390636	0.0556877	0.201461
YOR230W	0.326424	0.0556682	0.201461
YDR124W	-2.33353	0.0559547	0.202093
YML104C	-0.579405	0.0559468	0.202093
YMR108W	0.341403	0.0559792	0.202093
YNL274C	0.378053	0.0560625	0.202253
YBR273C	0.500369	0.0562592	0.202822
YDL078C	0.352802	0.0563094	0.202862
YGL095C	-0.453701	0.05656	0.203624
YHR072W-A	0.637824	0.0566633	0.203855
YNL095C	-0.6777	0.0568621	0.204428
YOL004W	0.386355	0.0570314	0.204895
YDL160C-A	0.662056	0.0571248	0.205089
YMR120C	-0.372758	0.0572485	0.205391
YLR180W	0.50121	0.0573239	0.20552
YLR080W	-0.688148	0.0573743	0.205558
YKR066C	0.377255	0.0576118	0.206267
YNL175C	0.436477	0.0578077	0.206826
YML069W	0.382899	0.0579452	0.207033
YPL269W	-0.800126	0.0579156	0.207033
YER053C-A	0.749547	0.0580904	0.207409
YBR097W	-0.561217	0.0586544	0.208992
YLR048W	0.333346	0.0586231	0.208992
YMR220W	-0.40571	0.0586058	0.208992
YPL245W	-0.44323	0.05873	0.209117
YHL024W	0.563102	0.0588339	0.209344
YGL071W	0.447783	0.0589146	0.209448
YJR065C	0.340711	0.0589842	0.209448
YLR067C	-0.588862	0.0589817	0.209448
YKR029C	0.44768	0.0595199	0.211062
YLR262C-A	0.620461	0.0595027	0.211062
YPR063C	0.361213	0.0599191	0.212333
YNL098C	0.350114	0.0603402	0.213608
YPL067C	0.604709	0.0603611	0.213608
YBL104C	-0.45945	0.0604276	0.213697
YHR062C	0.500246	0.0604958	0.213793
YIL157C	0.424711	0.0606116	0.214057
YPL177C	0.392062	0.0608147	0.214628
YDR175C	0.52624	0.060938	0.21471
YDL233W	0.487494	0.0610034	0.21471
YGL234W	0.378732	0.0609815	0.21471
YNL044W	-0.414236	0.0609563	0.21471
YBL045C	0.312335	0.061198	0.215249
YCR106W	-0.683868	0.0613203	0.215388
YPR068C	-0.767098	0.0613043	0.215388
YLR130C	-0.421368	0.0614632	0.215744
YIL142W	0.357618	0.0615178	0.21579
YOR257W	0.555844	0.0616417	0.216079
YBR044C	-0.592711	0.0622884	0.216685
YFR033C	0.466502	0.0623531	0.216685
YGL068W	0.377212	0.0621174	0.216685
YIR019C	-4.03916	0.0624404	0.216685
YIR039C	-0.787274	0.0618925	0.216685
YKL009W	0.423795	0.0623722	0.216685
YKR035W-A	0.435768	0.062432	0.216685
YMR212C	-0.411425	0.0623488	0.216685
YNL080C	-0.506852	0.0623103	0.216685
YNL079C	1.13696	0.0622661	0.216685
YNL172W	-0.453742	0.0619172	0.216685
YOR005C	-0.65632	0.0621633	0.216685
YOR166C	-0.62092	0.0621287	0.216685
YOR030W	-0.624098	0.0622912	0.216685
YOR373W	0.421304	0.0622559	0.216685
YJL200C	-0.364538	0.062521	0.21682
YPL057C	-0.454062	0.0625677	0.216837
YBR025C	0.37823	0.0629595	0.21805
YGR003W	-0.561805	0.0630527	0.218227
YOR385W	-0.574103	0.0632345	0.21871
YCR048W	0.597706	0.0633525	0.218973
YDR087C	0.41981	0.0635406	0.219477
YOL120C	0.363302	0.0636516	0.219714
YGR223C	-0.557231	0.0639474	0.220589
YER040W	0.449881	0.0640093	0.220656
YIL165C	3.1277	0.0642131	0.221179
YJL168C	0.397791	0.0642461	0.221179
YDR348C	0.484141	0.0643235	0.221298
YDR101C	-0.367435	0.0644565	0.221609
YOR116C	-0.32178	0.064527	0.221705
YCL034W	0.410576	0.0646408	0.221949
YDR490C	0.427969	0.0648469	0.222077
YKL062W	0.413712	0.0648188	0.222077
YPL214C	-0.492698	0.064721	0.222077
YPL014W	0.469532	0.0648491	0.222077
YKL135C	-0.360975	0.0649059	0.222125
YBR036C	-0.434099	0.0652416	0.222581
YGR244C	0.33911	0.0652533	0.222581
YJL062W	-0.401279	0.0652125	0.222581
YML017W	0.358029	0.065151	0.222581
YOR292C	-0.660011	0.0650911	0.222581
YCL027W	-0.550206	0.0655422	0.222689
YDR502C	0.466136	0.0655003	0.222689
YDR137W	-0.464731	0.0655406	0.222689
YJR059W	0.371774	0.0654016	0.222689
YLR292C	0.511131	0.0654449	0.222689
YOR374W	0.475362	0.065501	0.222689
YKL197C	-0.453999	0.0658068	0.223442
YDR407C	-0.409012	0.0659333	0.223725
YGL077C	-0.359387	0.0660812	0.224081
YIL002W-A	0.677351	0.0661327	0.224109
YLR273C	-0.780115	0.0663435	0.224677
YJL196C	-0.441505	0.0665254	0.225
YJR005W	-0.444318	0.0664954	0.225
YCR047C	0.550768	0.0668857	0.226071
YBL054W	0.575481	0.0670501	0.226479
YGL231C	0.388146	0.0672266	0.226781
YPL124W	0.747063	0.0672102	0.226781
YLR447C	-0.356582	0.0673652	0.227101
YDL133C-A	1.19936	0.0680224	0.228427
YER007W	-0.703533	0.0679787	0.228427
YGR006W	0.726962	0.0678721	0.228427
YGR021W	0.509167	0.0678649	0.228427
YHL013C	0.515807	0.0679286	0.228427
YML120C	0.36937	0.0680164	0.228427
YOR357C	0.488328	0.0684075	0.229572
YAL043C	0.484753	0.0684898	0.229699
YIL075C	-0.334839	0.0687942	0.230572
YBR110W	-0.429035	0.0689575	0.230729
YNL305C	0.424046	0.0689745	0.230729
YNL118C	0.380464	0.0688914	0.230729
YDL184C	1.19795	0.0691324	0.23096
YKL051W	-0.425264	0.0690899	0.23096
YBL017C	-0.358576	0.0692509	0.231207
YIL121W	-0.449676	0.0692964	0.231211
YER151C	0.338314	0.0693736	0.23132
YBL056W	-0.335994	0.0694604	0.23146
YOL139C	0.304571	0.0698289	0.232539
YBL040C	-0.423446	0.0699084	0.232655
YGL198W	0.458815	0.0701247	0.233225
YMR202W	-0.424356	0.0703218	0.233731
YDL091C	-0.521948	0.0705792	0.233891
YMR014W	0.468217	0.0705287	0.233891
YMR020W	-0.504908	0.0705951	0.233891
YMR315W	0.300119	0.0705533	0.233891
YNR018W	0.374859	0.0704731	0.233891
YOR370C	-0.402272	0.0709092	0.234782
YGR208W	0.407468	0.0709947	0.234916
YDR270W	-0.536304	0.071119	0.235177
YBL081W	0.455337	0.071258	0.235487
YKR006C	0.459627	0.0713657	0.235693
YDR052C	0.440333	0.0714166	0.235711
YDR180W	-0.461235	0.0715738	0.23608
YPL095C	-0.590024	0.0716927	0.236322
YDR179W-A	-0.727666	0.0718265	0.236463
YMR129W	-0.342805	0.0718077	0.236463
YBR172C	0.377444	0.0719855	0.236622
YBR234C	0.328234	0.0719935	0.236622
YGR081C	0.583439	0.0720116	0.236622
YDL102W	-0.367816	0.0721725	0.236852
YNL252C	0.435164	0.0721647	0.236852
YNL262W	-0.350231	0.0725415	0.237912
YOR380W	-0.70642	0.0725912	0.237925
YKL001C	-0.671472	0.072667	0.238023
YIL128W	-0.36361	0.0727306	0.238082
YER128W	0.740027	0.0727986	0.238154
YDR319C	-0.681938	0.0728793	0.238265
YNL227C	-0.510445	0.0729242	0.238265
YKR031C	-0.423099	0.0729872	0.238321
YIL098C	0.565214	0.0732551	0.239046
YDR380W	-1.62275	0.0734618	0.239463
YIL039W	-0.405746	0.0734753	0.239463
YHR203C	0.29382	0.0735731	0.239632
YKL028W	-0.468659	0.0736976	0.239887
YKL207W	-0.42792	0.0738441	0.240213
YGL220W	0.383399	0.0740596	0.240613
YLR207W	-0.408619	0.0740205	0.240613
YNL273W	-0.431157	0.0741444	0.240738
YGR286C	-0.490872	0.0742823	0.240913
YPL011C	-0.476472	0.0742912	0.240913
YNL084C	0.383422	0.0744044	0.24113
YKL170W	0.484775	0.0746309	0.241562
YNL254C	0.692249	0.0746288	0.241562
YBL085W	0.403124	0.074807	0.241938
YFR002W	-0.33935	0.0749204	0.241938
YHR150W	-0.61341	0.074915	0.241938
YOR087W	-0.390461	0.0749333	0.241938
YDR205W	-0.408961	0.0752813	0.242911
YBR159W	-0.343756	0.0753479	0.242975
YER071C	0.620773	0.0754815	0.243255
YGR046W	-0.526867	0.0756197	0.243549
YER007C-A	-1.32008	0.0757158	0.243556
YNL048W	-0.466512	0.0756771	0.243556
YLR423C	0.62944	0.0759965	0.244157
YOR123C	0.425188	0.0759599	0.244157
YKL065C	-0.435247	0.0761077	0.244363
YOR220W	0.384884	0.0762894	0.244795
YDL122W	-0.363502	0.0763909	0.24497
YHR116W	0.628151	0.0765778	0.245376
YJR113C	0.43551	0.076612	0.245376
YLR173W	-0.454609	0.0766918	0.24548
YDR173C	0.534799	0.0772758	0.247197
YKR051W	-0.627555	0.0775966	0.24807
YOR344C	0.46985	0.07765	0.248088
YIL133C	0.334239	0.0777235	0.248171
YIR009W	0.668454	0.0779221	0.248347
YLR164W	0.992963	0.0778979	0.248347
YPR138C	-1.33454	0.0779078	0.248347
YDL106C	0.428521	0.0781114	0.248797
YPL068C	0.670348	0.0781623	0.248807
YBR057C	0.489065	0.0782626	0.24885
YDL076C	-0.427927	0.0782884	0.24885
YGL073W	0.391975	0.0783195	0.24885
YDL192W	0.294813	0.0785229	0.249192
YMR126C	-0.705878	0.0785181	0.249192
YEL046C	0.339059	0.0786276	0.249236
YIL124W	0.319602	0.0786328	0.249236
YEL017C-A	0.488843	0.0788986	0.249773
YOR371C	-0.417635	0.0788858	0.249773
YJL012C	-0.314203	0.0790319	0.250043
YKL129C	-0.332575	0.0791921	0.250397
YBR077C	0.435427	0.0792907	0.250557
YOR324C	0.493365	0.0794501	0.250908
YDR070C	0.580778	0.079573	0.251143
YOR086C	-0.364272	0.0797599	0.25158
YDR117C	-2.5422	0.0798587	0.251739
YDL190C	-0.323056	0.0800736	0.252264
YBR059C	0.335054	0.0802565	0.252518
YJL101C	-0.383403	0.0802593	0.252518
YMR006C	-0.346183	0.0803258	0.252518
YNR074C	-0.487831	0.0803488	0.252518
YKL137W	0.513533	0.0805645	0.253043
YLR059C	0.405771	0.0806262	0.253083
YNL222W	0.498617	0.0807612	0.253354
YBL038W	0.421496	0.0809598	0.253824
YEL065W	-0.506218	0.0810712	0.25402
YBR194W	0.722005	0.0812098	0.254301
YDR476C	0.485727	0.0818683	0.256054
YKR071C	0.410403	0.0818191	0.256054
YML018C	-0.441125	0.0819273	0.256084
YPR145W	-0.349293	0.0820125	0.256197
YHR132C	-0.397101	0.082132	0.256416
YJR047C	0.973619	0.0823876	0.256936
YKL138C-A	0.614937	0.0823976	0.256936
YJR130C	-0.6028	0.0825192	0.257161
YGR102C	0.500316	0.0828541	0.25805
YJL130C	-0.284152	0.0830055	0.258329
YNL130C	-0.37453	0.0830433	0.258329
YDR410C	-0.500923	0.0831636	0.258534
YJL117W	-0.343513	0.083221	0.258534
YOR079C	-0.571969	0.0832585	0.258534
YGR014W	0.34152	0.0834764	0.259056
YPR179C	-0.452994	0.0836184	0.259342
YGL022W	-0.430317	0.0839603	0.260247
YER023W	0.354304	0.0842565	0.260993
YNL103W	0.408005	0.0843016	0.260993
YGR264C	-0.295512	0.0846463	0.261905
YJR112W	0.513026	0.0847006	0.261916
YCR026C	-0.401112	0.0849541	0.262194
YDR367W	-0.52105	0.0849923	0.262194
YHR007C	-0.375762	0.0849404	0.262194
YMR044W	0.438687	0.0849616	0.262194
YER072W	0.388724	0.0851213	0.262229
YMR072W	0.41341	0.0851551	0.262229
YOL071W	0.510663	0.0850998	0.262229
YNL195C	0.7809	0.0859757	0.264599
YJR145C	0.278228	0.0860924	0.264645
YMR287C	-0.493116	0.0860663	0.264645
YPL186C	0.651803	0.0862829	0.265074
YGL243W	-0.549376	0.0864567	0.265194
YMR308C	-0.302889	0.0864841	0.265194
YNL110C	0.49276	0.0865774	0.265194
YOR035C	-0.392217	0.0865558	0.265194
YOR348C	0.744867	0.0865372	0.265194
YOR013W	0.970295	0.086784	0.265671
YFR006W	-0.35548	0.0870729	0.266364
YJL206C	-0.627557	0.0871132	0.266364
YER175C	-0.578899	0.0875187	0.267351
YLR064W	-0.443933	0.0875388	0.267351
YDR435C	-0.471822	0.0877652	0.267885
YDR126W	-0.76889	0.0880044	0.268325
YIL005W	-0.384983	0.0880125	0.268325
YMR100W	-0.435371	0.0880904	0.268405
YGL190C	-0.405372	0.0884488	0.269339
YDR283C	-0.358362	0.088671	0.269785
YER014W	-0.403862	0.0887513	0.269785
YOL026C	0.462097	0.0887392	0.269785
YER054C	0.605349	0.0889243	0.270153
YOR174W	-0.559636	0.0890008	0.270227
YGR243W	0.729946	0.089282	0.270923
YER009W	0.32677	0.0894095	0.270993
YLR277C	-0.427317	0.0893624	0.270993
YPL123C	-0.495057	0.08947	0.271018
YCR032W	-0.429871	0.0898213	0.271766
YMR125W	-0.345969	0.0898102	0.271766
YGR266W	-0.388438	0.0898915	0.27182
YJL092W	-0.406299	0.0901484	0.272438
YOR130C	-0.518276	0.0904034	0.27305
YHL036W	-0.715017	0.0906044	0.273339
YLR299W	-0.423491	0.0905969	0.273339
YCL008C	0.512113	0.0906729	0.273387
YGR061C	-0.295076	0.0909992	0.274212
YJL205C	0.716674	0.0912691	0.274547
YJL065C	0.517691	0.0911742	0.274547
YLR229C	0.325079	0.0912298	0.274547
YMR227C	0.497946	0.0914683	0.274987
YJR033C	-0.404444	0.091796	0.275813
YAL009W	-0.653294	0.0923786	0.277403
YOR023C	0.408108	0.0925227	0.277589
YPR117W	-0.508237	0.0925476	0.277589
YGR196C	0.407773	0.0927824	0.278133
YDR273W	-1.24431	0.092972	0.278541
YHR020W	0.325619	0.0932807	0.279282
YJR133W	0.409568	0.0933269	0.279282
YKL140W	-0.379943	0.0934431	0.279466
YKR020W	0.729989	0.0934959	0.279466
YCR003W	0.478939	0.0936922	0.279536
YGR024C	-0.441533	0.093758	0.279536
YGR117C	-0.385887	0.0937016	0.279536
YOL048C	-0.473284	0.0937808	0.279536
YPL156C	-0.869355	0.0937885	0.279536
YIR031C	-1.193	0.0940717	0.280151
YLR440C	-0.369975	0.0941027	0.280151
YKL188C	-0.822871	0.0942071	0.280301
YGL004C	-0.555234	0.0944816	0.280796
YOL145C	-0.322598	0.0944421	0.280796
YOR232W	0.38711	0.0945604	0.28087
YHR060W	-0.450917	0.0947222	0.281029
YJL148W	0.483252	0.0947089	0.281029
YAL032C	0.48499	0.0949886	0.281659
YDL189W	0.408926	0.0950782	0.281763
YMR168C	-0.508189	0.0954554	0.28272
YDR046C	-0.395654	0.0956039	0.282998
YER161C	0.468842	0.0959685	0.283916
YDR383C	-0.643147	0.0960415	0.28397
YGL064C	0.494039	0.0962649	0.284469
YAL036C	0.327628	0.0964422	0.284669
YOR361C	0.32458	0.096432	0.284669
YAL014C	0.499143	0.0966492	0.285118
YER070W	-0.306751	0.097163	0.285822
YGL101W	0.46138	0.0970691	0.285822
YNL193W	-0.421128	0.096989	0.285822
YNL027W	0.373417	0.0971236	0.285822
YPL173W	0.419125	0.0970225	0.285822
YOL137W	-0.443208	0.0972701	0.285975
YAL026C	-0.342443	0.0976404	0.286902
YPL225W	0.480622	0.0979268	0.28758
YOL075C	-0.44825	0.0981884	0.288186
YCR023C	-0.419284	0.0982448	0.288188
YMR015C	-0.348931	0.0984069	0.288501
YGR074W	0.439912	0.0988448	0.289621
YLR143W	-0.431681	0.0992801	0.290733
YLR368W	-0.552322	0.0996834	0.29175
YJL145W	0.347296	0.0999145	0.291932
YML053C	0.495854	0.0998314	0.291932
YOL117W	-0.525683	0.0998933	0.291932
YIL063C	0.407662	0.100092	0.292287
YJR042W	-0.320062	0.100179	0.292375
YPR055W	-0.410945	0.100625	0.293512
YLL063C	-0.703049	0.100769	0.293767
YJL138C	0.287238	0.101322	0.295061
YKR064W	-0.489978	0.101326	0.295061
YER163C	-0.428143	0.101646	0.295828
YLR154C	0.604739	0.102329	0.297648
YLR134W	0.357917	0.102518	0.298031
YFL039C	0.367115	0.102892	0.298951
YDR284C	-0.4196	0.103075	0.299149
YLR133W	0.31315	0.103031	0.299149
YDR310C	0.419872	0.103305	0.299482
YJL047C	-0.454428	0.103301	0.299482
YKL059C	0.477439	0.103504	0.29989
YJR031C	-0.328899	0.103739	0.300238
YKL148C	0.362073	0.103695	0.300238
YNR075W	-0.64597	0.103891	0.300508
YDR144C	-0.35767	0.104057	0.300514
YKR059W	0.282295	0.104236	0.300514
YLR058C	0.318204	0.104081	0.300514
YLR347C	-0.278035	0.104215	0.300514
YML068W	-0.621378	0.10424	0.300514
YPL189W	-1.41414	0.104015	0.300514
YDL027C	-0.515262	0.104705	0.301354
YLR146W-A	0.635548	0.104659	0.301354
YLR274W	-0.335049	0.104664	0.301354
YBR076C-A	-1.79407	0.105017	0.301917
YPL111W	0.451895	0.104975	0.301917
YMR079W	0.285939	0.105234	0.302374
YGL012W	-0.391395	0.105401	0.302395
YHR152W	0.50256	0.105416	0.302395
YNR052C	0.316193	0.105377	0.302395
YDR167W	0.363547	0.105545	0.302596
YHR181W	-0.454147	0.10571	0.302903
YHR131C	-0.461318	0.10597	0.303148
YKR088C	-0.393576	0.105907	0.303148
YML052W	-0.421827	0.105946	0.303148
YMR105C	0.307177	0.106162	0.303528
YBR135W	0.405011	0.106499	0.303666
YDR320C	0.40291	0.106502	0.303666
YLR131C	0.35415	0.106375	0.303666
YLR450W	-0.34008	0.106397	0.303666
YNL124W	0.455559	0.106422	0.303666
YER140W	-0.52134	0.10751	0.306372
YHR051W	0.305879	0.107888	0.30728
YGR113W	0.458088	0.107985	0.307386
YLR092W	-0.784371	0.108218	0.307881
YDL201W	0.418697	0.108511	0.308546
YMR270C	-0.538055	0.108667	0.30882
YNL197C	0.315315	0.108818	0.308913
YPL010W	0.329209	0.108804	0.308913
YJL127C-B	0.741491	0.10912	0.3096
YER168C	-0.332334	0.109207	0.309677
YDR089W	-0.377472	0.109646	0.310605
YNR029C	-0.378494	0.109653	0.310605
YNL151C	0.411069	0.110307	0.312287
YDL095W	-0.330657	0.110512	0.312696
YLR383W	-0.418394	0.110634	0.312699
YML055W	-0.411747	0.110621	0.312699
YPL180W	0.368254	0.110782	0.312949
YBR175W	-0.431622	0.110848	0.312965
YLR187W	0.32474	0.111146	0.31359
YNL217W	-0.507865	0.11119	0.31359
YPL199C	0.347945	0.111584	0.31453
YER094C	0.351381	0.11207	0.315386
YGL203C	-0.312485	0.112042	0.315386
YOR205C	-0.517375	0.112011	0.315386
YIR001C	0.392324	0.112465	0.316157
YPR072W	0.344926	0.112419	0.316157
YGL206C	-0.267618	0.112605	0.316378
YDR023W	0.281351	0.112676	0.316407
YFR003C	0.446914	0.112796	0.316573
YHR135C	0.309814	0.113215	0.317436
YNL299W	0.449102	0.113226	0.317436
YDR092W	0.34435	0.113309	0.317499
YBR054W	-0.327397	0.113379	0.317523
YDR071C	0.339956	0.113698	0.318076
YGL213C	-0.347853	0.113883	0.318076
YNL111C	0.409649	0.113813	0.318076
YOL126C	0.266938	0.113876	0.318076
YPL072W	-0.641812	0.113864	0.318076
YDR512C	0.411165	0.113994	0.318215
YGL254W	0.573371	0.114115	0.318382
YJL024C	0.414705	0.114467	0.31886
YJL011C	0.572747	0.11447	0.31886
YJL183W	-0.305965	0.114349	0.31886
YNR012W	-0.405187	0.114817	0.319655
YOR295W	0.65045	0.11489	0.319685
YLR401C	0.320506	0.115149	0.320149
YPL144W	-0.432621	0.11518	0.320149
YAL044W-A	0.408834	0.115395	0.320436
YKL149C	-0.496828	0.115406	0.320436
YML128C	-0.47075	0.115494	0.32051
YDR356W	0.444566	0.115655	0.320784
YHR104W	0.273278	0.116091	0.321822
YCR042C	-0.319543	0.116482	0.322293
YDR178W	0.309662	0.116509	0.322293
YGL112C	-0.311127	0.116433	0.322293
YML115C	-0.318522	0.116339	0.322293
YGR083C	0.300508	0.116654	0.322521
YJL132W	-0.501103	0.116837	0.322684
YPL213W	0.482391	0.11679	0.322684
YHR171W	-0.446641	0.117539	0.324451
YDR331W	-0.407053	0.117726	0.324633
YJR021C	0.533662	0.11798	0.324633
YKL082C	0.533521	0.11792	0.324633
YMR022W	0.332204	0.117753	0.324633
YOR201C	0.406639	0.117969	0.324633
YOR307C	-0.402323	0.117909	0.324633
YGL141W	-0.364899	0.118292	0.32532
YDL084W	0.25976	0.118981	0.326872
YDR057W	-0.389685	0.119044	0.326872
YNR038W	0.314029	0.119046	0.326872
YFR038W	-0.344066	0.119109	0.326873
YGL244W	0.393745	0.1193	0.327224
YHL038C	-0.42807	0.11942	0.327382
YCR027C	-0.542609	0.11953	0.32751
YML035C	0.288246	0.119616	0.327572
YKL171W	0.456045	0.119725	0.327699
YHR017W	-0.472937	0.119961	0.328173
YDL135C	0.378582	0.120246	0.328404
YGR134W	-0.423238	0.120362	0.328404
YKL068W-A	0.558507	0.120122	0.328404
YOL159C	-0.603445	0.120274	0.328404
YPL140C	-0.440158	0.120341	0.328404
YDR469W	0.519104	0.120457	0.328489
YPL258C	-1.33686	0.120925	0.329594
YDR018C	-1.03987	0.121487	0.330951
YBL105C	-0.320686	0.121819	0.330999
YHR208W	0.272811	0.121813	0.330999
YLR022C	0.381977	0.121682	0.330999
YOL063C	-0.419333	0.121775	0.330999
YPL181W	0.382955	0.121823	0.330999
YJR016C	0.278373	0.12212	0.331632
YGR200C	-0.308343	0.122308	0.33197
YOR149C	-0.473357	0.122537	0.332417
YJR083C	0.451674	0.122815	0.332997
YDR177W	0.315511	0.123464	0.334582
YNL246W	0.330963	0.123666	0.334956
YER133W	-0.282841	0.12386	0.335307
YHR013C	0.297232	0.124016	0.335555
YLR057W	-0.369937	0.124096	0.335595
YGR057C	-0.599684	0.124425	0.336136
YPL158C	0.362052	0.124409	0.336136
YDL160C	0.256474	0.124659	0.336384
YDL157C	0.356252	0.124916	0.336384
YER180C	2.61654	0.125067	0.336384
YGL238W	-0.291383	0.124677	0.336384
YGL002W	-0.427359	0.1251	0.336384
YGR195W	0.36687	0.124971	0.336384
YHR004C	-0.470992	0.124849	0.336384
YIL105C	0.309942	0.124879	0.336384
YNL029C	-0.495566	0.124895	0.336384
YNL038W	-0.509976	0.125382	0.336793
YOR168W	0.28145	0.125321	0.336793
YDR208W	0.321075	0.125517	0.336809
YOL133W	0.386576	0.125458	0.336809
YGR278W	-0.449815	0.125917	0.337533
YOR238W	-0.473774	0.125862	0.337533
YKR103W	-2.74011	0.12605	0.337716
YJR091C	0.335202	0.126422	0.338537
YOL018C	0.366539	0.126812	0.339405
YDR147W	-0.384045	0.126902	0.339474
YDR201W	0.488139	0.127005	0.339573
YCR053W	0.287855	0.127176	0.339682
YMR154C	-0.579032	0.127145	0.339682
YKL163W	0.344807	0.128023	0.341767
YBR162C	-0.32332	0.12813	0.341876
YDR518W	-0.304262	0.128205	0.341902
YDR286C	-0.531677	0.128516	0.342324
YGL025C	0.37973	0.128561	0.342324
YIL059C	1.14061	0.128485	0.342324
YPR075C	0.331109	0.128934	0.343141
YDR121W	0.394216	0.129394	0.343315
YGL145W	-0.367276	0.12929	0.343315
YMR318C	0.255615	0.129084	0.343315
YOR092W	-0.401232	0.129363	0.343315
YPL273W	-0.308116	0.129396	0.343315
YPR086W	0.334704	0.129185	0.343315
YGR098C	-0.39138	0.129759	0.343927
YMR298W	0.293237	0.129743	0.343927
YDL086W	0.3172	0.130008	0.344239
YMR042W	0.612763	0.130009	0.344239
YDR044W	0.337533	0.130614	0.345665
YNL258C	-0.317156	0.13087	0.346167
YNL225C	0.421609	0.130974	0.346265
YBL079W	-0.289809	0.13111	0.346338
YDR065W	-0.643095	0.131303	0.346338
YER118C	-0.326174	0.131246	0.346338
YKL090W	-0.538422	0.131357	0.346338
YLR376C	-0.755159	0.131402	0.346338
YNL139C	-0.316036	0.13118	0.346338
YIL050W	0.420516	0.131645	0.346804
YGR155W	0.260006	0.131895	0.347284
YHR102W	0.33464	0.132128	0.347546
YHR163W	-0.286194	0.132124	0.347546
YHR090C	0.430381	0.132586	0.348139
YJL124C	0.34337	0.132621	0.348139
YML042W	-0.707975	0.132486	0.348139
YPL086C	-0.327196	0.132607	0.348139
YKL198C	0.509311	0.133082	0.348841
YLR319C	0.359417	0.133078	0.348841
YMR003W	0.521568	0.13309	0.348841
YBR281C	-0.326912	0.133223	0.349012
YNL070W	0.400559	0.133337	0.349135
YNL298W	0.329071	0.133513	0.34942
YGL029W	0.590582	0.13364	0.349422
YLR256W	0.296083	0.133648	0.349422
YBR240C	-0.962714	0.133891	0.349882
YDR482C	0.644859	0.134175	0.350093
YKL077W	-0.29491	0.134242	0.350093
YNL148C	0.532361	0.134041	0.350093
YOR046C	0.266088	0.134157	0.350093
YBR003W	-0.36736	0.13466	0.350748
YER020W	0.324634	0.134695	0.350748
YGL228W	-0.278661	0.134594	0.350748
YGR028W	-0.445515	0.134835	0.350787
YHR142W	-0.383499	0.134845	0.350787
YMR256C	0.354931	0.135385	0.351955
YMR043W	0.305337	0.13543	0.351955
[truncated: 3,406 more rows]
