# Supplementary material for: Decapping factor Dcp2 controls mRNA abundance and translation to adjust metabolism and filamentation to nutrient availability
Source: eLife journal article supplement (doi:10.7554/elife.85545), 2023-06-02
Supplement: fig5-figsupp1-data2 [file Figure 5 – figure supplement 1 – source data 2.xlsx]

## Sheet: dcp2 vs dcp2-EE TE changes
gene_ID	log2FC_TE	padj
YAL063C	-0.762909	0.620111
YAL054C	0.172421	0.954215
YAL049C	0.142191	0.888094
YAL047C	-0.31938	0.869031
YAL046C	0.385736	0.714321
YAL044C	0.0641598	0.956063
YAL043C	-0.0551658	0.967803
YAL040C	0.650204	0.01863
YAL039C	0.318706	0.637581
YAL036C	-0.0362446	0.976839
YAL034C	-0.439676	0.653915
YAL032C	-0.0254109	0.989399
YAL031C	-0.0338557	0.987229
YAL029C	0.170944	0.889923
YAL026C-A	-0.0465045	0.990501
YAL026C	0.0228878	0.987229
YAL025C	-0.101417	0.944587
YAL024C	0.189763	0.912718
YAL023C	0.27404	0.633294
YAL022C	0.34121	0.593546
YAL021C	0.1738	0.842313
YAL020C	-0.130695	0.952584
YAL015C	-0.233206	0.869667
YAL014C	-0.169914	0.909869
YAL010C	-0.133972	0.942026
YAL007C	0.534847	0.115155
YAL005C	0.0984956	0.931349
YAL001C	-0.0619375	0.976839
YAR002C-A	0.333521	0.510363
YAR007C	0.0514229	0.963691
YAR014C	0.0981284	0.937838
YAR018C	0.133826	0.912718
YAR019C	-0.236265	0.873543
YAR023C	-0.359625	0.954883
YAL064W-B	-0.184104	0.981174
YAL062W	-0.398998	0.849714
YAL061W	-0.363275	0.811761
YAL060W	-0.163464	0.869584
YAL059W	0.133035	0.917159
YAL058W	0.206903	0.888094
YAL056W	-0.444676	0.633294
YAL055W	0.140549	0.963691
YAL053W	-0.0871772	0.939258
YAL051W	-0.0139141	0.993872
YAL044W-A	0.00887811	0.99757
YAL042W	0.311526	0.643768
YAL041W	-0.0354737	0.977231
YAL038W	0.384383	0.609848
YAL037W	0.294571	0.957816
YAL035W	-0.102694	0.899654
YAL034W-A	-0.100709	0.968019
YAL033W	0.0112124	0.996696
YAL030W	0.118185	0.944587
YAL028W	-0.393484	0.868548
YAL027W	0.171782	0.920544
YAL019W	-0.10029	0.92295
YAL017W	-0.241409	0.721828
YAL016W	-0.0621585	0.952584
YAL013W	-0.077384	0.965023
YAL012W	0.0874078	0.926763
YAL011W	-0.00502716	0.999293
YAL009W	-0.112426	0.965023
YAL008W	0.129609	0.943662
YAL003W	0.282385	0.671373
YAL002W	-0.230274	0.869031
YAR002W	0.0162706	0.989399
YAR003W	0.193129	0.89775
YAR008W	-0.654564	0.551951
YAR015W	-0.0360066	0.977231
YAR027W	-0.216219	0.841284
YAR028W	-0.429873	0.68639
YAR031W	0.00765034	0.998685
YAR033W	-0.105902	0.96801
YAR035W	-0.0340514	0.991644
YAR042W	-0.143242	0.888094
YAR050W	0.237273	0.94086
YAR071W	0.605389	0.274924
YBL113C	0.053179	0.965023
YBL107C	-0.0247801	0.988861
YBL106C	1.1041	0.0802328
YBL105C	-0.2028	0.868753
YBL104C	0.047453	0.977231
YBL103C	-0.350145	0.699744
YBL101C	0.0749597	0.962443
YBL093C	-0.0523416	0.97588
YBL091C-A	-0.118935	0.957857
YBL091C	-0.0893568	0.943662
YBL088C	0.0885442	0.970256
YBL087C	0.201022	0.841284
YBL086C	-0.0868371	0.966426
YBL084C	-0.21286	0.912718
YBL080C	-0.133112	0.944995
YBL078C	-0.251633	0.869667
YBL076C	0.0802916	0.921157
YBL075C	-0.591354	0.407314
YBL074C	-0.418655	0.787262
YBL072C	0.216138	0.819553
YBL067C	0.37458	0.650093
YBL066C	-0.319257	0.759173
YBL064C	-0.0243301	0.987229
YBL061C	0.0777296	0.957816
YBL059C-A	0.0639607	0.970775
YBL057C	0.0466671	0.977231
YBL055C	0.183591	0.888094
YBL052C	0.270378	0.89775
YBL051C	0.033706	0.977231
YBL047C	-0.00998697	0.991836
YBL045C	-0.217355	0.73647
YBL042C	-0.204428	0.812109
YBL040C	0.00624324	0.99757
YBL039C	0.0997879	0.909869
YBL036C	0.233268	0.787262
YBL035C	-0.224021	0.847113
YBL034C	0.127442	0.942952
YBL033C	0.058495	0.96755
YBL030C	0.0664176	0.953908
YBL029C-A	-0.439098	0.637581
YBL028C	0.0909357	0.957994
YBL023C	0.13723	0.888094
YBL022C	-0.0884076	0.926659
YBL021C	-0.333096	0.860715
YBL018C	0.0904534	0.965023
YBL017C	0.158125	0.857183
YBL014C	-0.0501784	0.978373
YBL010C	-0.0335816	0.987229
YBL007C	0.00590567	0.996696
YBL006C	-0.11833	0.932978
YBL003C	-0.116032	0.904316
YBL001C	0.126224	0.900991
YBR001C	0.00276489	0.999293
YBR002C	0.172538	0.912464
YBR004C	0.165101	0.912464
YBR007C	-0.243765	0.823101
YBR008C	-0.284271	0.952584
YBR009C	-0.290259	0.547401
YBR011C	0.468989	0.166194
YBR014C	-0.08779	0.948906
YBR015C	0.369926	0.380415
YBR017C	-0.0839714	0.941417
YBR023C	0.239971	0.71191
YBR025C	0.104052	0.889515
YBR026C	0.192835	0.820206
YBR028C	-0.0730527	0.963691
YBR029C	0.323554	0.482411
YBR034C	-0.0660384	0.957994
YBR035C	0.0694567	0.954215
YBR036C	0.22507	0.724049
YBR037C	0.155777	0.889515
YBR042C	0.703545	0.132993
YBR043C	-0.866455	0.00164821
YBR044C	0.0060411	0.998685
YBR045C	0.229928	0.932798
YBR046C	0.263242	0.792359
YBR049C	-0.260694	0.777446
YBR050C	-0.780621	0.888342
YBR052C	-0.058384	0.963691
YBR053C	0.0574655	0.965023
YBR055C	-0.0479391	0.977231
YBR057C	-0.211862	0.865123
YBR058C	-0.158078	0.869031
YBR058C-A	0.0582838	0.97588
YBR059C	-0.0231628	0.982731
YBR060C	-0.0114486	0.99666
YBR061C	-0.0223821	0.987283
YBR062C	0.122897	0.942788
YBR063C	-0.0689023	0.991644
YBR065C	-0.618228	0.227256
YBR066C	0.467113	0.681635
YBR067C	0.19007	0.882812
YBR068C	-0.533084	0.00811298
YBR069C	-0.0781096	0.944587
YBR070C	0.314109	0.820874
YBR076C-A	-0.110464	0.97588
YBR077C	-0.0049027	0.998685
YBR079C	-0.0625054	0.944995
YBR080C	0.0868576	0.923807
YBR081C	-0.276894	0.850789
YBR082C	0.103348	0.922959
YBR084C-A	0.132265	0.888094
YBR085C-A	0.165593	0.841284
YBR086C	0.096627	0.908533
YBR088C	-0.191853	0.810308
YBR089C-A	0.0910023	0.944587
YBR091C	-0.0757643	0.968019
YBR092C	0.266792	0.688119
YBR093C	0.455421	0.271602
YBR095C	-0.349824	0.675109
YBR101C	-0.175405	0.847113
YBR102C	-0.0390116	0.977231
YBR105C	-0.0552082	0.977231
YBR107C	-0.153873	0.968029
YBR109C	0.134629	0.888094
YBR111C	0.0402897	0.973371
YBR112C	0.216277	0.815847
YBR115C	-0.10519	0.891615
YBR120C	0.105247	0.944587
YBR121C	0.161736	0.820315
YBR122C	0.0939782	0.944587
YBR123C	-0.190614	0.875137
YBR125C	0.231062	0.869667
YBR126C	-0.0335875	0.974602
YBR127C	0.249198	0.684232
YBR128C	-0.19045	0.966426
YBR129C	-0.235677	0.867478
YBR130C	-0.167612	0.888094
YBR132C	0.0853246	0.955282
YBR133C	0.327475	0.653915
YBR138C	-0.0197877	0.989646
YBR140C	-0.26523	0.719333
YBR141C	-0.342577	0.823101
YBR143C	-0.0504614	0.963691
YBR150C	0.0648945	0.977231
YBR154C	-0.0408762	0.97588
YBR156C	-0.0147231	0.99421
YBR157C	0.398561	0.891297
YBR162C	0.175656	0.811694
YBR164C	0.00304462	0.999293
YBR166C	0.0406911	0.974929
YBR167C	-0.238482	0.89775
YBR169C	-0.0394316	0.976687
YBR170C	-0.122388	0.909869
YBR172C	0.0716933	0.957816
YBR173C	-0.00438251	0.998685
YBR177C	0.179344	0.793585
YBR179C	-0.125411	0.915294
YBR181C	0.192955	0.841284
YBR182C	-0.156843	0.94086
YBR185C	0.0412028	0.977231
YBR188C	-0.176953	0.901972
YBR193C	-0.112234	0.944587
YBR195C	0.332669	0.790562
YBR196C	0.191196	0.823546
YBR197C	-0.539955	0.503208
YBR198C	-0.0512447	0.968727
YBR204C	-0.129647	0.94086
YBR208C	-0.204459	0.841284
YBR211C	-0.194982	0.915294
YBR216C	-0.234022	0.869667
YBR218C	0.152037	0.860988
YBR221C	0.197535	0.750619
YBR222C	0.399775	0.303238
YBR223C	-0.247872	0.888094
YBR229C	0.507004	0.07643
YBR230C	0.0710366	0.954215
YBR231C	-0.0979835	0.965023
YBR234C	0.0585698	0.957816
YBR236C	-0.0580758	0.96755
YBR238C	-0.119684	0.92226
YBR239C	-0.380201	0.69346
YBR240C	0.284649	0.921157
YBR241C	-0.0474266	0.977528
YBR243C	0.31755	0.719864
YBR245C	-0.0442963	0.969853
YBR247C	-0.269136	0.684046
YBR248C	0.248381	0.707513
YBR249C	0.24396	0.737037
YBR254C	0.0348273	0.987224
YBR255C-A	-0.0408639	0.987229
YBR256C	0.16903	0.868548
YBR258C	0.118165	0.96755
YBR260C	-0.12656	0.915294
YBR261C	0.090287	0.946316
YBR262C	-0.312435	0.759002
YBR264C	-0.0174562	0.993872
YBR269C	0.0413247	0.977231
YBR270C	-0.4048	0.888094
YBR272C	0.0965082	0.946316
YBR273C	0.0656379	0.963691
YBR275C	-0.0527123	0.974324
YBR276C	0.139615	0.929745
YBR280C	0.0824502	0.967736
YBR281C	-0.152983	0.896682
YBR283C	0.24324	0.650093
YBR288C	-0.145608	0.888094
YBR291C	0.0637586	0.970775
YBR296C	0.513672	0.89775
YBR298C	-1.14731	0.787452
YBL102W	0.0879488	0.944995
YBL099W	-0.0598154	0.954215
YBL098W	0.814544	0.0140781
YBL097W	-0.123636	0.959645
YBL095W	0.0956893	0.96755
YBL092W	0.202869	0.841284
YBL090W	-0.182702	0.869667
YBL089W	-0.113789	0.946896
YBL085W	0.126004	0.916701
YBL081W	0.288831	0.74174
YBL079W	-0.0944125	0.920537
YBL071W-A	-0.24024	0.860988
YBL068W	-0.105921	0.928369
YBL063W	0.272929	0.891297
YBL060W	-0.301507	0.857183
YBL059W	-0.0483721	0.978188
YBL058W	-0.0341068	0.976755
YBL056W	-0.223829	0.752151
YBL054W	-0.112297	0.942026
YBL050W	0.0626639	0.957857
YBL048W	0.680846	0.944587
YBL046W	0.0992016	0.952584
YBL043W	-0.368769	0.870894
YBL041W	-0.0463807	0.968019
YBL039W-B	-0.14409	0.973371
YBL038W	0.0309084	0.977528
YBL037W	-0.0990166	0.944587
YBL032W	0.0766573	0.952584
YBL031W	-0.308927	0.873543
YBL029W	0.173993	0.943662
YBL027W	0.13067	0.89775
YBL026W	-0.00704808	0.997697
YBL025W	-0.12706	0.954883
YBL024W	-0.0130063	0.99042
YBL020W	0.458035	0.61004
YBL019W	0.0739893	0.976755
YBL016W	-0.263087	0.765892
YBL015W	0.108402	0.943144
YBL011W	-0.0558982	0.968019
YBL009W	0.120889	0.918827
YBL008W	0.234885	0.867478
YBL005W	0.290403	0.848715
YBL004W	-0.113099	0.912718
YBL002W	-0.13447	0.869667
YBR003W	-0.0334967	0.978273
YBR005W	-0.207792	0.884079
YBR006W	0.250722	0.860988
YBR010W	-0.179455	0.855831
YBR016W	0.0647207	0.963691
YBR020W	-0.808302	0.888342
YBR021W	-0.171786	0.870894
YBR022W	-0.0270191	0.988725
YBR024W	0.121418	0.944587
YBR030W	-0.173542	0.912718
YBR031W	0.131327	0.909869
YBR033W	-0.947707	0.209905
YBR038W	0.317177	0.547401
YBR039W	0.058347	0.965023
YBR041W	0.320257	0.641366
YBR047W	0.575538	0.869667
YBR048W	0.216057	0.84085
YBR054W	0.243746	0.700944
YBR056W	-0.0952937	0.94086
YBR056W-A	-0.535077	0.588752
YBR071W	-0.196977	0.799178
YBR072W	-0.597989	0.274924
YBR073W	-0.178815	0.841284
YBR074W	0.0465492	0.970775
YBR078W	0.235114	0.650093
YBR083W	0.0548154	0.970846
YBR084W	0.172782	0.823546
YBR087W	0.00307376	0.999293
YBR094W	0.176346	0.888094
YBR096W	0.285656	0.71191
YBR097W	-0.0779284	0.96539
YBR098W	-0.00540895	0.999408
YBR103W	-0.176754	0.888094
YBR104W	0.31393	0.759002
YBR106W	0.612782	0.00427953
YBR108W	0.0515424	0.969177
YBR110W	0.258119	0.788218
YBR111W-A	0.0319623	0.987229
YBR114W	-0.225748	0.868548
YBR118W	0.27621	0.784821
YBR119W	0.250384	0.86428
YBR131W	-0.292726	0.869667
YBR135W	0.240151	0.79396
YBR136W	-0.245307	0.842313
YBR137W	0.242978	0.820874
YBR139W	-0.138685	0.884079
YBR142W	-0.213012	0.851567
YBR145W	0.220494	0.888094
YBR146W	0.310163	0.633294
YBR147W	0.534516	0.766257
YBR148W	0.647778	0.841284
YBR149W	-0.0899116	0.915294
YBR151W	0.308301	0.651839
YBR152W	-0.459843	0.798765
YBR153W	-0.350828	0.759002
YBR155W	-0.0851331	0.954828
YBR158W	-0.0279687	0.978273
YBR159W	0.134939	0.888094
YBR160W	0.0194198	0.987339
YBR161W	0.0973723	0.953909
YBR162W-A	0.330836	0.693362
YBR163W	0.0715898	0.977231
YBR165W	-0.122958	0.944587
YBR168W	-0.406126	0.799382
YBR171W	0.184805	0.86428
YBR175W	-0.190077	0.912718
YBR176W	0.590656	0.382042
YBR183W	-0.335913	0.656033
YBR184W	-0.212297	0.944995
YBR187W	0.234553	0.823101
YBR189W	0.188274	0.857287
YBR192W	0.253947	0.841284
YBR194W	0.246819	0.888094
YBR199W	0.00858947	0.996696
YBR200W	-0.103976	0.944587
YBR201W	0.157105	0.944995
YBR202W	0.208883	0.820874
YBR203W	-0.129428	0.927156
YBR205W	0.277492	0.693362
YBR207W	-0.0884039	0.944995
YBR210W	0.159644	0.931833
YBR212W	0.0590787	0.963691
YBR213W	0.401527	0.823101
YBR214W	-0.0564546	0.963691
YBR215W	-0.110119	0.944587
YBR217W	0.104219	0.970775
YBR225W	0.0179102	0.99042
YBR228W	0.197015	0.944587
YBR230W-A	-0.135557	0.94086
YBR233W	-0.227781	0.86428
YBR233W-A	0.226953	0.929167
YBR235W	0.349878	0.615637
YBR237W	-0.335195	0.811694
YBR242W	0.336765	0.671361
YBR244W	-0.193395	0.944325
YBR246W	-0.0487155	0.977231
YBR251W	-0.065455	0.963691
YBR252W	0.149719	0.909869
YBR253W	-0.201041	0.898623
YBR255W	-0.388047	0.787262
YBR257W	-0.168324	0.919785
YBR259W	0.140781	0.944587
YBR263W	0.660233	0.00501501
YBR265W	-0.179835	0.882812
YBR267W	0.156582	0.891297
YBR268W	0.0771986	0.963691
YBR271W	0.0699811	0.970775
YBR274W	0.131138	0.929745
YBR278W	-0.292054	0.85998
YBR279W	-0.338115	0.615637
YBR282W	0.0160908	0.99042
YBR284W	-0.363956	0.888094
YBR286W	0.263974	0.584036
YBR287W	0.0847184	0.944587
YBR289W	0.230148	0.812109
YBR290W	-0.177199	0.891297
YBR293W	-0.148527	0.954215
YBR294W	-1.05387	0.868753
YBR295W	-0.0833833	0.967753
YBR297W	-0.233678	0.884079
YBR299W	0.507282	0.651839
YCL064C	0.4202	0.704923
YCL061C	-0.320683	0.719864
YCL059C	-0.154161	0.857183
YCL057C-A	-0.00365733	0.998685
YCL056C	-0.523695	0.650093
YCL052C	0.0375464	0.976839
YCL050C	0.125253	0.888094
YCL049C	0.186533	0.857797
YCL047C	0.502707	0.313391
YCL045C	0.256835	0.576328
YCL044C	0.172062	0.869667
YCL043C	0.26958	0.69346
YCL041C	0.167373	0.888094
YCL038C	0.156942	0.888094
YCL037C	-0.0233794	0.985702
YCL035C	0.108255	0.904316
YCL033C	0.252272	0.719864
YCL031C	-0.158213	0.889515
YCL030C	-0.116365	0.888094
YCL029C	0.122331	0.939258
YCL026C-B	0.967425	0.0109965
YCL025C	-0.245641	0.630416
YCL017C	0.0841367	0.932978
YCL016C	0.16037	0.89775
YCL012C	0.0150313	0.992104
YCL011C	-0.0467795	0.968019
YCL010C	-0.204164	0.841284
YCL009C	0.336742	0.602622
YCL008C	0.191652	0.867478
YCL002C	0.251408	0.867478
YCR002C	0.0322451	0.976839
YCR004C	0.136988	0.867478
YCR005C	-0.0558478	0.953908
YCR007C	-0.534345	0.697881
YCR009C	-0.114297	0.888094
YCR011C	-0.0916363	0.918031
YCR014C	0.308467	0.891297
YCR015C	-0.337536	0.71191
YCR017C	0.125495	0.888094
YCR020C	-0.680055	0.637581
YCR020C-A	-0.0817977	0.957336
YCR021C	-1.03756	0.0222113
YCR023C	-0.0194041	0.98845
YCR024C	0.296122	0.681635
YCR024C-B	0.604017	0.82513
YCR024C-A	0.274526	0.811761
YCR026C	-0.0608092	0.956063
YCR027C	-0.252777	0.820874
YCR028C	-0.0880967	0.944995
YCR028C-A	0.201588	0.764414
YCR030C	-0.114029	0.888094
YCR031C	0.271008	0.783601
YCR035C	-0.133211	0.891615
YCR037C	0.203625	0.759002
YCR038C	-0.105728	0.957816
YCR042C	-0.154155	0.888094
YCR043C	0.338862	0.546121
YCR044C	0.277785	0.733961
YCR046C	0.184239	0.837833
YCR047C	0.312352	0.650093
YCR054C	-0.265821	0.69346
YCR057C	-0.0471162	0.968019
YCR059C	0.390549	0.412183
YCR067C	0.347578	0.300775
YCR071C	0.108619	0.912718
YCR072C	0.107574	0.921157
YCR073C	0.0125689	0.993872
YCR075C	0.0955633	0.957857
YCR076C	-0.08807	0.952584
YCR077C	-0.187141	0.74174
YCR084C	-0.0442557	0.967803
YCR087C-A	0.2061	0.841284
YCR090C	0.307113	0.650093
YCR092C	0.0322097	0.979548
YCR095C	-0.18621	0.885831
YCR098C	-0.113015	0.963691
YCR102C	1.03831	0.603202
YCL063W	0.171446	0.869667
YCL058W-A	0.42275	0.637581
YCL057W	0.197214	0.752151
YCL055W	0.022991	0.987339
YCL054W	0.0875661	0.940817
YCL051W	-0.0206433	0.987339
YCL048W	0.458023	0.89775
YCL040W	-0.107662	0.89775
YCL039W	-0.0410957	0.974929
YCL036W	-0.121317	0.936897
YCL034W	-0.125063	0.888094
YCL032W	-0.114614	0.915294
YCL028W	0.160742	0.855831
YCL027W	0.122343	0.96801
YCL024W	-0.327976	0.609662
YCL021W-A	1.0258	0.722685
YCL018W	-0.419398	0.527067
YCL014W	0.103272	0.923807
YCL005W-A	0.183725	0.847113
YCL005W	0.326035	0.759002
YCL004W	-0.33895	0.687471
YCL001W	0.0651313	0.955282
YCR003W	-0.0219586	0.987229
YCR008W	0.315974	0.615637
YCR012W	0.286638	0.776698
YCR016W	-0.0415298	0.977231
YCR019W	-0.185309	0.888094
YCR020W-B	-0.668408	0.343426
YCR032W	-0.124278	0.944414
YCR033W	0.313651	0.750619
YCR034W	0.249107	0.650093
YCR036W	0.0764754	0.944587
YCR045W-A	0.505852	0.952584
YCR048W	0.632738	0.117528
YCR051W	0.141458	0.889515
YCR052W	0.0776065	0.944587
YCR053W	0.0752364	0.944995
YCR061W	0.309158	0.588752
YCR063W	-0.771743	0.0407427
YCR065W	-0.214809	0.777446
YCR066W	-0.18905	0.888094
YCR068W	-0.261151	0.76705
YCR069W	0.15872	0.861996
YCR073W-A	-0.0428922	0.973371
YCR075W-A	0.18378	0.89775
YCR079W	0.447056	0.637581
YCR081W	-0.379891	0.651839
YCR082W	0.0116197	0.993872
YCR083W	0.209724	0.841284
YCR086W	0.0626117	0.966557
YCR088W	0.161656	0.841284
YCR089W	-0.949525	0.159973
YCR091W	-0.39264	0.684564
YCR093W	0.130691	0.884079
YCR094W	0.130481	0.888094
YCR095W-A	0.577957	0.944995
YCR105W	0.136969	0.970775
YCR106W	-0.584911	0.274924
YCR107W	-0.760045	0.615637
YDL243C	-0.283162	0.909869
YDL239C	0.0807918	0.98845
YDL238C	-0.46627	0.707513
YDL235C	0.582433	0.11705
YDL234C	-0.404999	0.5072
YDL231C	-0.236799	0.912718
YDL227C	0.62594	0.218206
YDL226C	-0.238428	0.719864
YDL224C	-0.00337385	0.998685
YDL222C	-0.271153	0.888094
YDL220C	-0.135854	0.94348
YDL217C	-0.113802	0.932798
YDL216C	-0.114701	0.963691
YDL215C	-0.250044	0.719864
YDL214C	0.208156	0.962583
YDL213C	0.0772534	0.954828
YDL211C	0.167023	0.944587
YDL209C	0.0125757	0.996696
YDL205C	-0.2338	0.884079
YDL203C	-0.00624275	0.997697
YDL200C	0.210449	0.921157
YDL199C	0.0095289	0.998622
YDL198C	0.302506	0.551951
YDL197C	-0.295701	0.869667
YDL190C	-0.23497	0.719864
YDL188C	0.207719	0.79396
YDL187C	0.632442	0.944587
YDL184C	0.0746795	0.963691
YDL183C	0.0318162	0.989399
YDL177C	0.0183765	0.996696
YDL175C	-0.0471847	0.977231
YDL174C	-0.0232059	0.994453
YDL171C	0.582188	0.00143625
YDL169C	0.217587	0.944587
YDL167C	-0.137685	0.89775
YDL166C	-0.225352	0.857183
YDL164C	0.129183	0.908256
YDL160C-A	-0.258083	0.912718
YDL160C	-0.591596	0.00438329
YDL157C	0.203264	0.86428
YDL153C	-0.0332647	0.987229
YDL148C	-0.27532	0.787262
YDL145C	0.213689	0.693362
YDL144C	0.0648075	0.970256
YDL142C	0.237689	0.877193
YDL140C	0.162315	0.841284
YDL139C	0.0430623	0.987283
YDL135C	-0.00671683	0.99757
YDL134C	-0.00536853	0.99757
YDL133C-A	0.0746795	0.963691
YDL126C	0.100899	0.900982
YDL125C	0.140445	0.888094
YDL121C	0.066021	0.965023
YDL119C	0.298352	0.791711
YDL115C	0.0504486	0.977231
YDL113C	-0.0602779	0.97086
YDL111C	-0.0985224	0.944587
YDL110C	0.0241145	0.984518
YDL109C	-0.572578	0.754646
YDL106C	-0.343022	0.650093
YDL104C	0.105666	0.965023
YDL103C	0.160124	0.857287
YDL101C	0.124881	0.915294
YDL100C	0.0253184	0.977528
YDL098C	0.103625	0.973371
YDL097C	-0.155486	0.841284
YDL091C	0.0411423	0.979628
YDL090C	0.0252405	0.989399
YDL088C	-0.0113881	0.993872
YDL087C	-0.601695	0.561146
YDL085C-A	0.369433	0.835804
YDL083C	0.245268	0.722685
YDL081C	0.295941	0.615637
YDL080C	-0.340782	0.75052
YDL079C	-0.27909	0.942952
YDL078C	0.0639513	0.955013
YDL077C	-0.0606186	0.970775
YDL076C	-0.0418008	0.977528
YDL074C	-0.219584	0.86428
YDL072C	0.0682409	0.952584
YDL069C	0.00861506	0.998685
YDL067C	0.0656798	0.963691
YDL065C	-0.211966	0.891297
YDL063C	0.0844636	0.952584
YDL061C	0.0351655	0.977231
YDL059C	-0.164094	0.957816
YDL055C	0.00860279	0.994127
YDL054C	0.358432	0.719864
YDL053C	0.494812	0.274924
YDL052C	0.383628	0.482063
YDL049C	0.0743816	0.977231
YDL048C	-0.0916593	0.963691
YDL045C	-0.214161	0.888094
YDL044C	-0.133162	0.953908
YDL043C	-0.309489	0.841284
YDL042C	0.170248	0.889342
YDL040C	-0.00365819	0.998685
YDL039C	0.206246	0.940817
YDL036C	-0.18227	0.900982
YDL035C	0.405624	0.719864
YDL033C	0.211862	0.912718
YDL028C	-0.0533732	0.977231
YDL027C	0.0120276	0.996696
YDL025C	-0.196962	0.869667
YDL024C	0.0133437	0.998685
YDL020C	-0.115985	0.911478
YDL019C	0.0615429	0.963691
YDL018C	0.285879	0.754764
YDL015C	-0.00379729	0.998685
YDL012C	-0.063778	0.965023
YDL005C	-0.169352	0.888094
YDL002C	-0.251095	0.888094
YDR001C	-0.195246	0.763424
YDR005C	-0.149784	0.900982
YDR006C	-0.148315	0.888094
YDR008C	0.5402	0.89775
YDR016C	0.0721776	0.976839
YDR017C	-0.232185	0.811694
YDR018C	0.459077	0.793585
YDR019C	-0.394595	0.5072
YDR020C	-0.317552	0.822975
YDR022C	0.370142	0.792359
YDR026C	0.0872265	0.965023
YDR027C	-0.129579	0.944587
YDR028C	-0.228827	0.823101
YDR030C	0.125872	0.960907
YDR032C	0.203979	0.747569
YDR034C	0.0370791	0.978188
YDR036C	0.355155	0.621144
YDR038C	0.0133109	0.99042
YDR045C	0.211901	0.888094
YDR046C	-0.279159	0.637581
YDR050C	0.171149	0.869667
YDR051C	0.166061	0.888094
YDR052C	-0.0976709	0.953908
YDR054C	-0.165617	0.867478
YDR056C	0.182096	0.869667
YDR058C	0.344768	0.862965
YDR059C	-0.104415	0.946316
YDR066C	-0.50901	0.791711
YDR067C	-0.0853063	0.965023
YDR069C	-0.0764244	0.967736
YDR071C	-0.065019	0.957336
YDR072C	-0.139361	0.888094
YDR078C	-0.11177	0.974929
YDR079C-A	0.569346	0.650093
YDR081C	0.0100118	0.996696
YDR084C	0.2863	0.768978
YDR085C	-0.0728685	0.968019
YDR086C	0.2703	0.697718
YDR087C	-0.0901522	0.94461
YDR088C	0.111711	0.960907
YDR090C	0.105043	0.953908
YDR091C	0.0168863	0.987339
YDR097C	-0.167548	0.888094
YDR098C	0.205625	0.79396
YDR101C	-0.139357	0.869667
YDR104C	-0.409878	0.783601
YDR105C	-0.184912	0.888094
YDR107C	0.0450063	0.979655
YDR109C	-0.416765	0.650093
YDR111C	-0.281214	0.820315
YDR113C	-0.415315	0.554529
YDR116C	0.133566	0.89775
YDR117C	0.0441625	0.977231
YDR120C	0.00999007	0.99666
YDR123C	-0.43877	0.656033
YDR125C	-0.19588	0.944587
YDR129C	-0.0602485	0.953908
YDR130C	-0.406492	0.659626
YDR131C	-0.0777856	0.970256
YDR132C	0.27499	0.888094
YDR133C	0.312008	0.880646
YDR135C	0.0543062	0.960907
YDR139C	0.0986842	0.957449
YDR141C	-0.210945	0.790562
YDR142C	0.219759	0.893303
YDR143C	-0.0427769	0.977231
YDR144C	0.422702	0.346873
YDR146C	0.0264274	0.979628
YDR148C	-0.00597817	0.99757
YDR151C	-0.112221	0.933663
YDR153C	-0.226912	0.76705
YDR162C	-0.28354	0.811694
YDR164C	0.0773165	0.957994
YDR166C	-0.342498	0.699744
YDR169C	-0.171517	0.877193
YDR170C	-0.0701567	0.944995
YDR173C	-0.17422	0.915294
YDR175C	-0.0513666	0.970775
YDR179C	-0.140754	0.963691
YDR181C	-0.128594	0.944587
YDR185C	0.425618	0.841284
YDR186C	-0.0888825	0.952584
YDR190C	-0.0309849	0.977231
YDR192C	0.0813158	0.963691
YDR194C	0.159662	0.87073
YDR196C	-0.104769	0.944694
YDR198C	-0.164884	0.933904
YDR200C	0.157341	0.926463
YDR202C	-0.199599	0.888094
YDR207C	0.223255	0.85306
YDR217C	0.0968469	0.963691
YDR219C	-0.402763	0.681635
YDR224C	-0.251439	0.650093
YDR228C	-0.00685458	0.997697
YDR231C	-0.140438	0.909869
YDR233C	0.267785	0.615637
YDR236C	0.180491	0.908533
YDR238C	-0.0946875	0.90936
YDR239C	0.238911	0.839672
YDR240C	-0.225827	0.89775
YDR243C	-0.278228	0.811694
YDR248C	0.0061781	0.998685
YDR249C	-0.0325265	0.99042
YDR255C	-0.102951	0.963691
YDR256C	-0.228284	0.968019
YDR257C	-0.276374	0.74174
YDR258C	-0.281539	0.5072
YDR259C	0.215224	0.940817
YDR260C	-0.251371	0.868548
YDR261C	0.613497	0.0264094
YDR263C	-0.316071	0.89775
YDR264C	-0.135942	0.889515
YDR266C	-0.0592752	0.963691
YDR267C	-0.106445	0.954828
YDR276C	0.110154	0.931349
YDR277C	-0.576781	0.144603
YDR282C	-0.233123	0.908679
YDR283C	-0.209194	0.869667
YDR284C	0.281461	0.703153
YDR286C	0.271706	0.888094
YDR289C	-0.151515	0.912718
YDR292C	0.0178077	0.989399
YDR293C	-0.186286	0.791711
YDR294C	0.0642053	0.956279
YDR295C	-0.295695	0.792359
YDR298C	-0.00783901	0.996696
YDR300C	0.453938	0.396436
YDR303C	0.0725389	0.962443
YDR304C	0.186518	0.820315
YDR305C	0.191177	0.888094
YDR306C	-0.0939482	0.957816
YDR308C	-0.308872	0.764414
YDR309C	-0.488743	0.0749922
YDR310C	-0.0099635	0.996696
YDR313C	-0.351261	0.827974
YDR314C	-0.247286	0.909869
YDR315C	0.163853	0.952584
YDR319C	0.0121273	0.996696
YDR320C	-0.179198	0.857287
YDR320C-A	-0.0238581	0.99042
YDR322C-A	-0.175939	0.86428
YDR323C	0.255245	0.899553
YDR324C	-0.109408	0.912037
YDR326C	-0.0537102	0.970775
YDR328C	-0.127463	0.889515
YDR329C	-0.0707281	0.965952
YDR333C	-0.0327289	0.977231
YDR338C	0.0562661	0.977231
YDR339C	-0.0798568	0.954779
YDR341C	0.142412	0.860988
YDR342C	-0.423878	0.0622137
YDR343C	-0.423974	0.0622137
YDR345C	0.197049	0.722685
YDR346C	0.167025	0.857287
YDR348C	0.120431	0.90732
YDR349C	0.243325	0.811694
YDR350C	-0.275413	0.823546
YDR357C	0.183043	0.89775
YDR359C	-0.02886	0.987224
YDR361C	-0.172707	0.888094
YDR362C	-0.235412	0.884079
YDR364C	-0.400725	0.693914
YDR365C	-0.204182	0.847113
YDR366C	0.562901	0.838488
YDR369C	0.124892	0.954883
YDR370C	0.13642	0.940817
YDR372C	-0.015805	0.989399
YDR375C	0.314363	0.703153
YDR378C	0.286173	0.764414
YDR379C-A	0.30749	0.866913
YDR381C-A	-0.133016	0.942788
YDR383C	-0.0249472	0.991644
YDR384C	-0.0497804	0.98845
YDR387C	-0.0869663	0.970256
YDR390C	-0.332232	0.615637
YDR391C	-0.373921	0.57602
YDR397C	-0.195908	0.870894
YDR402C	0.673254	0.889515
YDR404C	0.223009	0.850789
YDR407C	-0.0902786	0.952584
YDR408C	0.0508581	0.970775
YDR410C	0.444149	0.700944
YDR411C	0.0182716	0.989326
YDR414C	0.182627	0.915143
YDR415C	0.0611278	0.970256
YDR422C	-0.0670967	0.963691
YDR423C	-0.147331	0.916884
YDR424C	0.231284	0.869667
YDR428C	0.497288	0.491777
YDR429C	-0.217967	0.69346
YDR430C	0.0528742	0.968019
YDR435C	0.207303	0.888094
YDR441C	0.315149	0.787262
YDR443C	0.000812359	0.99988
YDR445C	0.854722	0.777446
YDR447C	0.0638452	0.963691
YDR449C	-0.125414	0.915294
YDR451C	-0.224153	0.793585
YDR453C	-0.0743938	0.977231
YDR454C	0.404819	0.298148
YDR458C	-0.252948	0.82513
YDR459C	-0.136054	0.957857
YDR461C-A	0.121189	0.970256
YDR465C	-0.130333	0.898354
YDR468C	-0.0265261	0.987283
YDR470C	0.208263	0.869584
YDR473C	-0.11284	0.957336
YDR475C	-0.0323968	0.985301
YDR476C	0.0146256	0.99421
YDR479C	-0.0853252	0.963691
YDR481C	0.256557	0.731269
YDR482C	-0.246087	0.916326
YDR485C	-0.303247	0.820315
YDR486C	0.31526	0.650093
YDR487C	0.239598	0.71191
YDR488C	-0.00626002	0.999293
YDR490C	0.0454261	0.977231
YDR495C	-0.320727	0.847113
YDR496C	-0.154659	0.860715
YDR497C	0.0588908	0.957816
YDR498C	-0.0716019	0.967736
YDR500C	0.276292	0.69367
YDR502C	0.140619	0.867478
YDR503C	0.107514	0.963691
YDR504C	0.157521	0.984518
YDR505C	-0.152657	0.888342
YDR506C	0.186015	0.915294
YDR507C	-0.252355	0.73617
YDR508C	-0.108246	0.888094
YDR512C	0.56451	0.489893
YDR514C	0.130474	0.942026
YDR516C	0.173002	0.855831
YDR520C	0.184528	0.913195
YDR524C	0.160296	0.91171
YDR524C-B	0.121493	0.916163
YDR529C	-0.196393	0.787262
YDR530C	-0.14151	0.939686
YDR532C	-0.310739	0.869667
YDR533C	0.22152	0.841284
YDR534C	0.994483	0.869667
YDR535C	-0.130119	0.98845
YDR541C	0.578033	0.688017
YDL248W	0.0218357	0.982751
YDL244W	0.453903	0.71956
YDL241W	0.806921	0.313391
YDL240W	-0.0896041	0.957994
YDL237W	0.300903	0.719864
YDL236W	0.0639896	0.963691
YDL233W	-0.100264	0.953908
YDL232W	-0.212524	0.94086
YDL230W	0.212553	0.891021
YDL229W	0.251657	0.724049
YDL225W	0.0538229	0.968522
YDL219W	0.277296	0.820874
YDL218W	0.299155	0.952584
YDL212W	0.178558	0.841284
YDL210W	0.191753	0.97086
YDL208W	-0.0547957	0.963691
YDL207W	0.19395	0.889515
YDL206W	-0.0447985	0.987229
YDL204W	-0.845547	0.00380408
YDL202W	0.16639	0.869667
YDL201W	0.250396	0.79396
YDL195W	0.196997	0.719864
YDL194W	-0.169519	0.944995
YDL193W	0.065423	0.965526
YDL192W	0.192594	0.787262
YDL191W	0.275743	0.74174
YDL189W	-0.072293	0.965023
YDL185W	0.204751	0.737037
YDL182W	0.122328	0.889515
YDL181W	-0.0709071	0.963691
YDL180W	0.31836	0.823101
YDL179W	-0.163457	0.888094
YDL178W	0.13677	0.888094
YDL176W	-0.408895	0.719864
YDL173W	-0.190539	0.820874
YDL170W	-0.180307	0.896682
YDL168W	0.132358	0.888094
YDL165W	0.0517044	0.97588
YDL161W	-0.215068	0.848715
YDL159W	0.00437184	0.999293
YDL156W	-0.239208	0.888342
YDL155W	-0.148183	0.908533
YDL154W	-0.165169	0.965023
YDL150W	-0.31771	0.650093
YDL149W	-0.0485696	0.977231
YDL147W	-0.208185	0.841284
YDL146W	0.192594	0.936947
YDL143W	0.0210246	0.983341
YDL141W	0.0990828	0.944587
YDL138W	0.497612	0.67325
YDL137W	0.192981	0.785957
YDL136W	0.262023	0.768978
YDL133W	-0.392538	0.719864
YDL132W	-0.133805	0.894616
YDL131W	0.151249	0.867478
YDL130W-A	-0.0691262	0.963691
YDL130W	0.209042	0.841284
YDL129W	0.239416	0.957816
YDL128W	0.183836	0.833791
YDL127W	-0.105097	0.963691
YDL124W	-0.0500595	0.968019
YDL123W	-0.0656141	0.977231
YDL122W	-0.179973	0.869667
YDL120W	-0.0226091	0.987339
YDL117W	-0.0989234	0.943662
YDL116W	-0.101762	0.932744
YDL112W	-0.266462	0.656033
YDL108W	-0.326804	0.789852
YDL107W	-0.179596	0.910411
YDL105W	-0.568869	0.637581
YDL102W	-0.00761146	0.99688
YDL099W	-0.179795	0.891297
YDL095W	0.281789	0.527067
YDL093W	0.289393	0.759002
YDL092W	-0.108053	0.941417
YDL089W	0.257734	0.867478
YDL086W	-0.0960177	0.930686
YDL085W	-0.17834	0.97086
YDL084W	0.102082	0.900982
YDL082W	0.170874	0.867478
YDL075W	0.120558	0.909869
YDL073W	-0.228748	0.891297
YDL070W	-0.0127376	0.993872
YDL066W	0.324893	0.366269
YDL064W	0.103833	0.944587
YDL060W	-0.0268085	0.979628
YDL058W	-0.0197404	0.991644
YDL057W	0.332523	0.833791
YDL056W	-0.0623277	0.97086
YDL051W	0.0984869	0.913195
YDL046W	0.23571	0.787262
YDL045W-A	-0.0270016	0.987229
YDL031W	0.142694	0.888094
YDL030W	-0.266051	0.869667
YDL029W	-0.0118263	0.99042
YDL022W	-0.173195	0.820315
YDL021W	0.288014	0.820315
YDL017W	-0.0715821	0.970775
YDL014W	-0.127462	0.898221
YDL013W	0.1271	0.944587
YDL010W	-0.108074	0.944587
YDL008W	-0.253326	0.86428
YDL007W	0.00220728	0.999293
YDL006W	-0.143467	0.944587
YDL004W	0.0928194	0.94086
YDL003W	-0.128647	0.929745
YDL001W	-0.3195	0.763424
YDR002W	0.0955767	0.910411
YDR003W-A	0.679584	0.942026
YDR004W	-0.131114	0.953908
YDR007W	-0.888937	0.358739
YDR009W	-0.0900846	0.976687
YDR011W	-0.236478	0.69346
YDR012W	0.107991	0.932744
YDR013W	-0.164435	0.919785
YDR014W	-0.20826	0.912718
YDR021W	-0.00194667	0.999483
YDR023W	-0.0311399	0.977231
YDR025W	0.109909	0.933663
YDR031W	-0.401711	0.650093
YDR033W	0.237037	0.688017
YDR034W-B	-0.191968	0.921157
YDR035W	0.175996	0.830438
YDR037W	0.00553935	0.99757
YDR041W	0.24525	0.765892
YDR044W	0.168739	0.89775
YDR047W	0.019378	0.98845
YDR049W	-0.0260194	0.987229
YDR055W	-0.0488502	0.965023
YDR057W	0.00239159	0.999483
YDR060W	-0.247341	0.737037
YDR061W	0.110174	0.942026
YDR062W	0.079454	0.942026
YDR063W	0.12376	0.933706
YDR064W	0.17991	0.869667
YDR065W	-0.0388115	0.98845
YDR068W	-0.0303665	0.99421
YDR073W	0.0254376	0.989399
YDR074W	-0.266484	0.551951
YDR075W	-0.136288	0.944587
YDR076W	-0.567486	0.69367
YDR077W	-0.0463881	0.977231
YDR079W	0.164706	0.915294
YDR080W	-0.332747	0.719864
YDR082W	-0.890425	0.74174
YDR083W	-0.093456	0.954883
YDR089W	-0.188238	0.868548
YDR092W	0.152125	0.888094
YDR093W	0.359629	0.503208
YDR096W	-0.145792	0.888094
YDR099W	0.243879	0.650093
YDR100W	-0.337304	0.684564
YDR103W	-0.164716	0.888094
YDR106W	-0.78407	0.796753
YDR108W	-0.277122	0.841284
YDR110W	0.00874743	0.998195
YDR115W	0.117354	0.921157
YDR118W	0.169915	0.921157
YDR119W	0.0902873	0.933904
YDR119W-A	-0.92895	0.4637
YDR121W	-0.385418	0.703724
YDR122W	-0.202761	0.819414
YDR124W	-0.304148	0.941417
YDR126W	0.367263	0.860988
YDR127W	0.230703	0.637581
YDR128W	-0.00218627	0.999483
YDR137W	-0.0323526	0.987324
YDR138W	-0.0253131	0.987339
YDR140W	-0.036086	0.982731
YDR145W	-0.0431316	0.973371
YDR147W	-0.273207	0.823101
YDR150W	-0.354776	0.888094
YDR152W	-0.351345	0.588752
YDR158W	0.379107	0.277314
YDR159W	0.196977	0.896682
YDR160W	-0.222798	0.969177
YDR161W	-0.0330914	0.977528
YDR163W	0.197713	0.891297
YDR165W	-0.184827	0.843415
YDR167W	-0.182574	0.888094
YDR168W	-0.0511818	0.97588
YDR171W	-0.334017	0.458155
YDR172W	-0.119066	0.888094
YDR174W	-0.178652	0.79396
YDR176W	-0.145168	0.94173
YDR177W	0.0198309	0.987229
YDR178W	0.293401	0.69346
YDR179W-A	0.0830523	0.970775
YDR180W	0.34618	0.765892
YDR182W	0.200181	0.839818
YDR183W	-0.078747	0.970256
YDR188W	0.0785652	0.942788
YDR189W	-0.0582516	0.963691
YDR191W	0.108912	0.957816
YDR195W	-0.131756	0.911478
YDR197W	0.038743	0.982731
YDR201W	-0.0259337	0.991644
YDR204W	-0.145566	0.916884
YDR205W	-0.0245149	0.98845
YDR206W	-0.406914	0.528373
YDR208W	-0.0787151	0.946316
YDR210W	-0.155565	0.888094
YDR211W	-0.045197	0.968727
YDR212W	0.0961157	0.913308
YDR213W	-0.691497	0.0610229
YDR214W	-0.0242871	0.979628
YDR216W	-0.40221	0.227256
YDR221W	-0.0396581	0.977231
YDR222W	-0.101566	0.952584
YDR223W	1.87793	0.618659
YDR225W	-0.288036	0.633294
YDR226W	0.246989	0.650093
YDR227W	-0.244033	0.869584
YDR229W	-0.2361	0.863351
YDR232W	0.143104	0.877813
YDR234W	0.215704	0.811694
YDR235W	-0.306969	0.841284
YDR237W	0.365612	0.588752
YDR241W	-1.43294	0.656033
YDR242W	-0.51207	0.653187
YDR244W	-0.169351	0.888094
YDR245W	0.251963	0.719864
YDR246W	-0.0285291	0.988142
YDR247W	-0.565173	0.551951
YDR251W	0.031945	0.977528
YDR252W	-0.570416	0.650093
YDR254W	-0.200352	0.921968
YDR262W	-0.209202	0.848158
YDR265W	-0.207705	0.902096
YDR268W	0.240327	0.860988
YDR270W	-0.135153	0.944587
YDR272W	-0.0545512	0.966426
YDR273W	0.147824	0.977231
YDR275W	-0.104464	0.970256
YDR279W	0.037829	0.987229
YDR280W	-0.186387	0.869667
YDR285W	-0.324525	0.897002
YDR287W	-0.0310228	0.987339
YDR288W	-0.428322	0.725541
YDR291W	-0.0605336	0.97588
YDR296W	0.152549	0.888094
YDR297W	0.048445	0.970775
YDR299W	-0.314226	0.650093
YDR301W	-0.22977	0.835804
YDR302W	-0.0524896	0.976839
YDR307W	0.118467	0.915143
YDR311W	-0.196628	0.888094
YDR312W	-0.068975	0.963691
YDR316W	-0.0077399	0.998622
YDR317W	1.09852	0.503208
YDR318W	-0.132387	0.957857
YDR321W	0.202381	0.811694
YDR322W	-0.0259577	0.982731
YDR325W	-0.241563	0.86428
YDR330W	-0.136285	0.909869
YDR331W	-0.263543	0.737037
YDR332W	0.169766	0.944587
YDR334W	-0.152194	0.944694
YDR335W	-0.163452	0.867478
YDR336W	-0.0686204	0.977231
YDR337W	0.130517	0.910411
YDR347W	0.23069	0.787262
YDR351W	0.0104284	0.996696
YDR352W	0.384224	0.607362
YDR353W	0.259113	0.650093
YDR354W	0.25217	0.719864
YDR356W	-0.179353	0.911478
YDR358W	-0.165188	0.888094
YDR363W	-0.32028	0.884079
YDR363W-A	-0.15247	0.900982
YDR367W	0.27212	0.777446
YDR368W	0.273302	0.650093
YDR371W	-0.0276685	0.98845
YDR374W-A	-0.202914	0.939669
YDR376W	0.276946	0.764414
YDR377W	-0.140805	0.89775
YDR379W	-0.276224	0.811694
YDR380W	-0.343143	0.588752
YDR381W	0.218865	0.71191
YDR382W	0.113986	0.910411
YDR385W	0.321838	0.551951
YDR386W	-0.119538	0.953908
YDR388W	-0.0817887	0.937838
YDR389W	0.131344	0.912718
YDR392W	-0.0976224	0.965023
YDR393W	0.075879	0.970256
YDR394W	-0.0424646	0.970775
YDR395W	-0.0941543	0.910411
YDR398W	-0.186152	0.841284
YDR399W	0.00504623	0.998596
YDR401W	0.164573	0.982731
YDR403W	0.0274618	0.994453
YDR405W	-0.0659661	0.965023
YDR406W	-0.346762	0.71956
YDR409W	0.322089	0.768978
YDR412W	-0.0296232	0.987229
YDR416W	0.208637	0.888094
YDR418W	0.0904089	0.943662
YDR419W	0.0532807	0.977231
YDR420W	0.236023	0.707513
YDR421W	-0.289753	0.841284
YDR425W	-0.231194	0.888094
YDR427W	-0.0266028	0.979548
YDR434W	0.366222	0.459486
YDR436W	-0.162622	0.891297
YDR438W	-0.10195	0.989399
YDR439W	0.127914	0.957816
YDR440W	0.00945427	0.99757
YDR444W	-0.191007	0.89775
YDR448W	-0.425123	0.491777
YDR450W	0.116719	0.912525
YDR452W	0.142826	0.89775
YDR456W	0.124474	0.915294
YDR457W	-0.387409	0.229102
YDR460W	-0.0772595	0.968019
YDR462W	-0.0251505	0.987229
YDR463W	-0.255791	0.69346
YDR464W	-0.103724	0.956063
YDR466W	-0.188544	0.888094
YDR469W	-0.0514185	0.976755
YDR471W	-0.0754625	0.944995
YDR472W	-0.108605	0.944587
YDR477W	0.0229907	0.982731
YDR478W	-0.00625918	0.998685
YDR483W	0.482318	0.0610229
YDR484W	-0.133069	0.94086
YDR489W	-0.182846	0.904316
YDR492W	0.221686	0.841284
YDR493W	0.0953794	0.954828
YDR494W	0.0326043	0.979628
YDR499W	-0.222288	0.909869
YDR501W	0.123871	0.957994
YDR510W	0.257651	0.721828
YDR511W	0.0540133	0.973371
YDR513W	-0.0205385	0.987283
YDR515W	0.07533	0.966426
YDR517W	0.367035	0.579896
YDR518W	0.480374	0.32369
YDR519W	0.412103	0.481832
YDR525W-A	-0.154325	0.888094
YDR527W	0.0315217	0.986846
YDR528W	0.0693727	0.974324
YDR531W	0.124597	0.916701
YDR536W	-2.39901	0.0412713
YDR538W	0.263872	0.860988
YDR539W	0.0584264	0.966557
YEL073C	-0.792308	0.134761
YEL068C	0.131373	0.965023
YEL064C	-0.132616	0.946316
YEL063C	-0.254271	0.855831
YEL061C	-0.226797	0.894878
YEL060C	-0.0898352	0.937838
YEL059C-A	0.552735	0.657328
YEL055C	0.157199	0.888094
YEL054C	0.133845	0.891297
YEL053C	-0.169217	0.892446
YEL050C	0.215588	0.811694
YEL048C	-0.330136	0.868548
YEL047C	-0.0539239	0.96801
YEL046C	-0.242154	0.697718
YEL039C	0.290374	0.778657
YEL037C	0.0705367	0.952697
YEL036C	0.156189	0.869667
YEL029C	0.0699752	0.97086
YEL025C	0.0274687	0.98845
YEL023C	-1.19755	0.779551
YEL017C-A	0.415801	0.888094
YEL016C	0.260314	0.888094
YEL009C	0.276557	0.637169
YEL005C	-0.0253008	0.99042
YEL002C	0.138229	0.869667
YEL001C	0.116016	0.909869
YER003C	0.219176	0.75052
YER007C-A	0.0621018	0.965023
YER008C	-0.059422	0.968019
YER010C	0.0235556	0.988861
YER017C	0.0539382	0.963691
YER018C	-0.205272	0.89775
YER019C-A	0.371998	0.448399
YER026C	0.000571032	0.99988
YER027C	0.155729	0.877908
YER028C	1.15011	0.258081
YER029C	-0.000144562	0.99988
YER031C	0.0716124	0.951537
YER033C	-0.0447323	0.977528
YER036C	0.00489879	0.997697
YER038C	-0.351285	0.888094
YER039C	-0.690646	0.912718
YER043C	0.289701	0.703724
YER044C	0.429243	0.313391
YER044C-A	0.844078	0.842313
YER045C	-0.291442	0.811761
YER047C	-0.25252	0.811761
YER048C	-0.0734633	0.952584
YER050C	-0.293707	0.71191
YER052C	0.156881	0.841284
YER053C	-0.309645	0.57625
YER053C-A	-0.332716	0.650093
YER054C	-0.894768	0.087468
YER055C	-0.158397	0.85306
YER056C	-0.206152	0.733961
YER056C-A	0.0715948	0.954215
YER057C	0.258397	0.719864
YER061C	0.0131228	0.996696
YER062C	0.0564343	0.965023
YER064C	-0.201809	0.811694
YER065C	0.610721	0.776539
YER071C	0.166932	0.912718
YER075C	-0.125608	0.935728
YER076C	0.00318095	0.999483
YER077C	-0.2647	0.719864
YER078C	0.147252	0.912037
YER082C	-0.259441	0.706048
YER083C	-0.0957876	0.933663
YER087C-B	0.284735	0.74174
YER088C	-0.153547	0.877813
YER088C-A	0.132833	0.967736
YER089C	-0.145878	0.888094
YER091C	0.387808	0.173035
YER093C	-0.0675195	0.970775
YER093C-A	0.22325	0.904316
YER094C	0.0760501	0.944995
YER099C	-0.149694	0.895524
YER101C	-0.222385	0.867478
YER105C	-0.118111	0.900991
YER107C	0.201679	0.86428
YER109C	-0.671827	0.388758
YER110C	0.0652489	0.953908
YER111C	0.0337438	0.987229
YER113C	0.373169	0.626032
YER114C	0.171389	0.86428
YER115C	-0.555167	0.868699
YER116C	-0.397595	0.707513
YER118C	0.238112	0.766625
YER119C	0.209262	0.867478
YER122C	0.0587663	0.957816
YER124C	-0.40229	0.274924
YER126C	-0.143751	0.888094
YER130C	-0.203388	0.867478
YER132C	0.148937	0.915294
YER134C	0.0382821	0.977231
YER137C	-0.489527	0.777446
YER139C	-0.0740203	0.968019
YER142C	0.661539	0.641366
YER144C	0.247724	0.799499
YER145C	0.261464	0.846163
YER147C	-0.0943519	0.962874
YER149C	0.155212	0.91171
YER151C	-0.0598957	0.959586
YER152C	0.403328	0.615637
YER155C	-0.132168	0.908256
YER156C	0.0991627	0.921968
YER158C	0.364789	0.79396
YER159C	-0.160016	0.912718
YER161C	-0.312896	0.787262
YER162C	-0.51035	0.637581
YER163C	-0.160484	0.896682
YER168C	-0.0859111	0.944587
YER172C	-0.424821	0.324044
YER174C	0.169531	0.89775
YER175C	0.0096872	0.996696
YER180C	0.566198	0.944587
YER180C-A	-0.449369	0.835804
YER183C	0.176155	0.900991
YER184C	-0.103786	0.968019
YER186C	0.304787	0.944995
YER188C-A	0.781762	0.90732
YEL072W	-0.737334	0.841284
YEL071W	0.217443	0.71191
YEL070W	-0.130268	0.974602
YEL066W	0.183656	0.869667
YEL065W	-1.0561	0.407314
YEL062W	0.0714254	0.970256
YEL058W	0.26451	0.697718
YEL056W	0.132145	0.912718
YEL052W	0.144514	0.897757
YEL051W	0.293941	0.618659
YEL049W	0.455778	0.904316
YEL044W	0.455598	0.547401
YEL043W	-0.0310691	0.980123
YEL042W	0.396552	0.388918
YEL041W	-0.442748	0.793292
YEL040W	0.141689	0.868548
YEL038W	0.317755	0.69367
YEL034W	0.344489	0.590013
YEL033W	0.389954	0.89775
YEL032W	-0.0219179	0.987339
YEL031W	0.16631	0.857287
YEL030W	-0.653903	0.626032
YEL028W	-0.173066	0.982731
YEL027W	0.243794	0.716655
YEL026W	0.137418	0.888094
YEL024W	-0.22826	0.75052
YEL022W	-0.126476	0.902624
YEL021W	-0.236483	0.763424
YEL020W-A	-0.0532767	0.967803
YEL018W	-0.110869	0.960907
YEL017W	-0.0506838	0.973371
YEL015W	-0.273038	0.69367
YEL013W	0.0469165	0.968019
YEL012W	-0.0782853	0.96801
YEL011W	-0.379429	0.650093
YEL007W	-0.0972725	0.944587
YEL006W	-0.0726104	0.967803
YEL004W	0.213785	0.909869
YEL003W	0.0425373	0.984518
YER001W	-0.150408	0.861996
YER002W	-0.130671	0.942026
YER004W	0.317833	0.637169
YER005W	-0.126344	0.943662
YER006W	0.215548	0.738241
YER007W	0.104605	0.968522
YER009W	0.292556	0.609662
YER011W	1.33444	0.115155
YER012W	0.0717383	0.952584
YER013W	-0.0396807	0.977528
YER014W	0.1001	0.946896
YER015W	-0.127023	0.946896
YER016W	-0.0029291	0.999408
YER019W	0.227389	0.846863
YER020W	0.054757	0.970256
YER021W	-0.0540823	0.957994
YER022W	-0.156949	0.900982
YER023W	0.580882	0.0222113
YER024W	0.0859189	0.965023
YER025W	0.0637526	0.954828
YER030W	0.0639171	0.973371
YER032W	-0.154321	0.888094
YER034W	-0.10294	0.957816
YER035W	-0.456773	0.228196
YER037W	-0.314673	0.910411
YER040W	-0.0134961	0.993974
YER041W	-0.122225	0.96237
YER042W	0.146349	0.917159
YER046W	0.0721894	0.977231
YER048W-A	0.0901671	0.954883
YER049W	0.0173354	0.987339
YER051W	-0.188033	0.932978
YER058W	0.438216	0.71956
YER059W	-0.189659	0.888094
YER060W	0.617359	0.650093
YER060W-A	-0.174268	0.888094
YER063W	-0.0647328	0.965023
YER066W	-0.081566	0.982731
YER067W	-0.902906	3.49846e-05
YER068W	0.0601918	0.965023
YER069W	0.321708	0.407314
YER070W	-0.340044	0.314777
YER072W	0.0312492	0.977528
YER073W	-0.294885	0.561146
YER074W	0.19067	0.842167
YER074W-A	0.123291	0.943662
YER079W	-0.52932	0.458155
YER080W	0.295746	0.599077
YER081W	0.178071	0.835804
YER086W	0.198387	0.799499
YER087W	0.155622	0.909869
YER090W	0.0984952	0.909869
YER092W	-0.38248	0.637581
YER095W	0.191097	0.841284
YER096W	0.917517	0.689181
YER098W	-0.453538	0.764414
YER100W	0.0831213	0.946208
YER102W	0.203031	0.841213
YER103W	-0.0530871	0.970775
YER104W	-0.453763	0.719864
YER112W	0.143012	0.912718
YER117W	0.216961	0.820874
YER120W	0.197904	0.827529
YER121W	-0.33075	0.912718
YER123W	-0.090956	0.955013
YER125W	-0.0428884	0.967803
YER127W	-0.256003	0.759002
YER128W	0.0731121	0.970775
YER129W	0.0115138	0.996696
YER131W	0.0429447	0.974243
YER133W	0.0261808	0.979628
YER136W	0.255811	0.650093
YER138W-A	0.780594	0.791711
YER140W	0.508838	0.637169
YER141W	0.108981	0.908533
YER143W	0.151942	0.888094
YER146W	0.0258638	0.987324
YER148W	0.113776	0.915294
YER150W	-0.560833	0.366723
YER154W	0.347902	0.551951
YER157W	0.00539525	0.998685
YER164W	0.00481149	0.998685
YER165W	0.354653	0.28336
YER166W	-0.0785844	0.944587
YER167W	-0.200423	0.844391
YER169W	0.0445826	0.977231
YER170W	-0.227663	0.888094
YER171W	-0.0823027	0.953908
YER173W	2.80851e-05	0.999911
YER176W	-0.273512	0.787262
YER177W	0.185688	0.841284
YER178W	0.302888	0.551951
YER182W	0.306313	0.69346
YER188W	0.656869	0.869667
YFL057C	0.0626402	0.987229
YFL054C	-0.491772	0.588752
YFL050C	0.690365	0.871946
YFL048C	0.0981857	0.921157
YFL045C	0.354021	0.347478
YFL044C	-0.184816	0.888094
YFL042C	-0.111417	0.944587
YFL039C	0.37728	0.448596
YFL038C	0.0333649	0.976839
YFL034C-B	-0.0719916	0.963691
YFL034C-A	0.140975	0.889515
YFL033C	0.0627835	0.967736
YFL029C	-0.0463618	0.979628
YFL028C	0.0988027	0.942952
YFL027C	0.0142486	0.996696
YFL025C	0.157302	0.891297
YFL024C	0.0805678	0.963715
YFL022C	0.242267	0.681635
YFL020C	-0.734933	0.905753
YFL018C	0.115873	0.888094
YFL017C	-0.0148946	0.992493
YFL016C	-0.122834	0.888094
YFL013C	-0.362702	0.57625
YFL010C	0.0421036	0.97086
YFL002C	-0.134922	0.89775
YFR003C	-0.0500197	0.973371
YFR005C	-0.116239	0.944587
YFR011C	-0.0512955	0.97588
YFR014C	-0.0580653	0.970775
YFR015C	-0.547947	0.0936891
YFR016C	-0.0476173	0.977231
YFR017C	-0.549506	0.313391
YFR018C	0.32397	0.753178
YFR024C-A	0.12308	0.900982
YFR025C	0.224924	0.845996
YFR026C	0.153403	0.973371
YFR028C	-0.0729135	0.95638
YFR031C	0.0450441	0.979628
YFR031C-A	0.186046	0.863576
YFR032C-A	0.181663	0.869667
YFR033C	-0.305453	0.61004
YFR034C	-0.194736	0.867478
YFR037C	-0.146753	0.869667
YFR039C	0.310683	0.719864
YFR041C	-0.226182	0.86428
YFR043C	-0.110478	0.957816
YFR044C	0.124496	0.889767
YFR046C	-0.860547	0.241148
YFR047C	0.559598	0.126534
YFR050C	-0.00512422	0.99757
YFR051C	0.182645	0.838488
YFR053C	-0.265344	0.653187
YFL055W	-0.00599194	0.999408
YFL052W	-0.622921	0.650093
YFL049W	-0.139805	0.913308
YFL047W	0.0861406	0.953908
YFL046W	0.282992	0.838488
YFL041W	0.300358	0.719864
YFL037W	0.30848	0.448153
YFL036W	0.0153162	0.989399
YFL034W	-0.215116	0.877193
YFL031W	0.0708148	0.960907
YFL030W	-0.120317	0.963691
YFL026W	0.471201	0.946896
YFL023W	-0.0357586	0.979548
YFL021W	0.00278527	0.999293
YFL017W-A	0.0154122	0.994542
YFL014W	-0.123572	0.889515
YFL009W	-0.16271	0.877193
YFL008W	-0.334209	0.759002
YFL007W	-0.166755	0.867478
YFL005W	0.165893	0.850789
YFL004W	0.143445	0.888094
YFL001W	-0.0392095	0.979548
YFR001W	-0.134377	0.944587
YFR002W	-0.133521	0.889515
YFR004W	-0.0709633	0.946316
YFR006W	-0.0275157	0.977528
YFR007W	-0.278418	0.857183
YFR008W	-0.185966	0.888094
YFR009W	-0.216638	0.719864
YFR010W	-0.083369	0.94086
YFR013W	0.154807	0.888094
YFR019W	-0.13813	0.912525
YFR020W	1.04174	0.56729
YFR021W	0.463964	0.594442
YFR022W	-0.505035	0.615637
YFR027W	-0.268127	0.900982
YFR029W	-0.224793	0.884079
YFR030W	0.219366	0.835804
YFR034W-A	0.210004	0.954828
YFR038W	-0.257193	0.811761
YFR040W	-0.190752	0.877193
YFR042W	0.493977	0.547401
YFR045W	0.191275	0.888342
YFR048W	-0.305059	0.725292
YFR049W	0.21329	0.869031
YFR052W	-0.0890074	0.921157
YFR055W	-0.531813	0.165154
YGL257C	0.172576	0.909869
YGL252C	0.0593856	0.964495
YGL251C	-0.375855	0.841284
YGL246C	0.00316547	0.999293
YGL242C	0.0172682	0.989646
YGL237C	-0.201146	0.888094
YGL236C	0.32601	0.693362
YGL231C	0.0682134	0.955145
YGL229C	0.391647	0.864721
YGL226C-A	0.33742	0.693914
YGL224C	0.132995	0.921157
YGL223C	-0.0737842	0.963691
YGL222C	-0.680195	0.00810076
YGL221C	-0.00290843	0.999293
YGL219C	-0.0987632	0.937838
YGL213C	0.0184961	0.989203
YGL206C	0.140892	0.868548
YGL204C	0.698812	0.681635
YGL203C	0.272257	0.69367
YGL201C	-0.133492	0.895519
YGL200C	0.406653	0.228196
YGL194C-A	0.0877974	0.977231
YGL194C	-0.282241	0.794721
YGL190C	-0.0927615	0.952584
YGL189C	0.181006	0.869667
YGL187C	-0.145062	0.888094
YGL186C	0.195266	0.848158
YGL185C	0.0262843	0.98845
YGL184C	0.255079	0.915294
YGL179C	0.0846407	0.977231
YGL176C	0.0795232	0.97588
YGL175C	-0.250633	0.936897
YGL173C	-0.330527	0.283823
YGL167C	0.101554	0.910411
YGL164C	-0.176747	0.921157
YGL163C	0.250911	0.841284
YGL161C	0.177048	0.869667
YGL154C	0.192027	0.944587
YGL150C	-0.144565	0.89775
YGL147C	0.111492	0.921968
YGL146C	0.452284	0.917918
YGL144C	-0.0152994	0.996696
YGL143C	0.397565	0.650093
YGL142C	0.169835	0.908533
YGL140C	-0.074378	0.954828
YGL136C	-0.351578	0.846863
YGL131C	-0.183364	0.912718
YGL129C	0.238774	0.782487
YGL128C	-0.381865	0.792359
YGL127C	0.0293783	0.98845
YGL124C	-0.216275	0.888094
YGL122C	0.123579	0.898354
YGL121C	-0.179759	0.89775
YGL120C	-0.0590891	0.963691
YGL112C	-0.145702	0.897002
YGL110C	-0.136736	0.932798
YGL108C	-0.388024	0.763424
YGL107C	0.129885	0.903914
YGL104C	0.0327726	0.987229
YGL095C	-0.188668	0.869667
YGL094C	-0.123904	0.943662
YGL091C	-0.172978	0.888094
YGL087C	0.058977	0.965023
YGL084C	0.141492	0.888094
YGL078C	0.00833114	0.99666
YGL077C	0.114065	0.896682
YGL076C	0.15952	0.888094
YGL075C	-0.0841565	0.977231
YGL072C	0.820981	0.912464
YGL070C	-0.114056	0.932798
YGL065C	0.0570545	0.970256
YGL064C	-0.155004	0.900991
YGL061C	-0.14771	0.932978
YGL057C	-0.160066	0.92226
YGL056C	-0.270707	0.681635
YGL054C	0.186202	0.836033
YGL049C	0.0358002	0.97588
YGL048C	-0.164905	0.827529
YGL044C	0.0847666	0.957994
YGL040C	0.0927158	0.932798
YGL038C	0.0318326	0.979628
YGL037C	-0.0407366	0.969853
YGL035C	0.0766094	0.954883
YGL031C	0.208432	0.820315
YGL028C	-0.272398	0.671373
YGL027C	0.366659	0.551951
YGL026C	0.154529	0.855831
YGL025C	-0.371303	0.637169
YGL023C	0.210322	0.841284
YGL020C	-0.129341	0.915294
YGL018C	-0.316231	0.791711
YGL013C	-0.204395	0.842313
YGL011C	-0.111349	0.910411
YGL009C	0.138804	0.888094
YGL008C	0.201987	0.76705
YGL005C	-0.360267	0.725541
YGL004C	0.387131	0.727568
YGL003C	0.248716	0.867478
YGL001C	0.310267	0.551951
YGR001C	-0.100405	0.937838
YGR002C	-0.306215	0.681635
YGR005C	0.0336033	0.982215
YGR008C	-0.352351	0.588752
YGR009C	-0.191584	0.841284
YGR015C	-0.296337	0.888094
YGR020C	0.0207267	0.987324
YGR024C	0.32507	0.733961
YGR027C	0.148865	0.888094
YGR030C	-0.17005	0.900982
YGR033C	-0.13449	0.916884
YGR036C	-0.277705	0.847113
YGR037C	0.490207	0.195951
YGR043C	0.614404	0.463227
YGR044C	0.153972	0.891297
YGR045C	-0.22509	0.977528
YGR047C	0.272922	0.737037
YGR050C	-1.25019	0.637581
YGR053C	0.779294	0.722685
YGR057C	-0.295734	0.888094
YGR061C	0.172935	0.791711
YGR062C	0.397826	0.763424
YGR063C	-0.0502667	0.97588
YGR065C	0.306108	0.703724
YGR067C	0.275091	0.921157
YGR068C	0.0216141	0.99042
YGR071C	-0.203226	0.909869
YGR073C	0.537591	0.952611
YGR075C	-0.0182033	0.993974
YGR076C	0.321479	0.651839
YGR077C	-0.0141167	0.993872
YGR078C	0.0581742	0.968029
YGR081C	-0.15218	0.891297
YGR083C	-0.0790043	0.942026
YGR084C	0.276525	0.650093
YGR085C	0.144361	0.888094
YGR086C	0.0824131	0.915294
YGR087C	0.514661	0.93024
YGR095C	0.104203	0.944587
YGR098C	0.0177432	0.992493
YGR102C	0.166505	0.912718
YGR104C	-0.0586844	0.97588
YGR106C	0.296818	0.587838
YGR109C	-0.0700446	0.968522
YGR117C	-0.0373198	0.979548
YGR119C	-0.0815194	0.944587
YGR120C	0.0731067	0.968019
YGR121C	0.311187	0.823101
YGR122C-A	0.460974	0.841284
YGR123C	0.24151	0.759002
YGR128C	-0.174758	0.857183
YGR130C	-0.12543	0.894616
YGR132C	0.267442	0.650093
YGR138C	0.141581	0.888094
YGR146C	0.413902	0.656569
YGR147C	0.110873	0.944587
YGR148C	0.231095	0.777446
YGR150C	-0.0878479	0.963691
YGR154C	-0.697858	0.884079
YGR158C	-0.221533	0.841284
YGR159C	0.131387	0.888094
YGR161C	-0.342379	0.483303
YGR168C	-0.00295005	0.999483
YGR169C	-0.0518148	0.977528
YGR169C-A	-0.354769	0.75052
YGR171C	0.157914	0.915294
YGR172C	0.0954224	0.936897
YGR174C	0.321008	0.787262
YGR175C	0.159269	0.860988
YGR177C	-0.0366576	0.979628
YGR178C	0.0886871	0.915294
YGR179C	-0.382593	0.719864
YGR180C	0.351795	0.330466
YGR182C	0.527686	0.941417
YGR183C	-0.0375365	0.977231
YGR184C	-0.152374	0.886356
YGR185C	0.00616515	0.99757
YGR187C	0.0308236	0.977528
YGR188C	-0.175628	0.953909
YGR189C	-0.137854	0.870894
YGR192C	0.351539	0.681635
YGR193C	0.0252899	0.980123
YGR194C	-0.136125	0.913308
YGR196C	-0.0465403	0.977231
YGR197C	0.110127	0.957336
YGR200C	0.0144987	0.989646
YGR201C	0.511049	0.76705
YGR202C	0.296364	0.650093
YGR207C	-0.107829	0.912718
YGR209C	0.261991	0.670368
YGR210C	0.145294	0.888094
YGR213C	0.361027	0.912718
YGR216C	0.0297181	0.987229
YGR220C	0.298952	0.650093
YGR221C	-0.327246	0.889342
YGR223C	-0.0295931	0.987339
YGR229C	-0.0364449	0.977231
YGR231C	0.165849	0.855831
YGR233C	0.14983	0.915078
YGR235C	-0.141047	0.888094
YGR237C	0.111345	0.944587
YGR238C	-0.0892466	0.968019
YGR239C	-0.387775	0.651839
YGR240C	0.146062	0.864721
YGR241C	0.181967	0.877193
YGR244C	0.13705	0.877908
YGR245C	-0.202966	0.808128
YGR246C	0.0404653	0.977231
YGR250C	-0.0878002	0.944995
YGR253C	-0.110542	0.89775
YGR255C	0.287189	0.725541
YGR257C	0.167334	0.913308
YGR258C	0.087101	0.965023
YGR259C	0.608673	0.944587
YGR261C	-0.0731624	0.948906
YGR262C	-0.321582	0.709084
YGR263C	0.399573	0.798057
YGR264C	-0.0391609	0.970775
YGR267C	0.224182	0.759002
YGR268C	-0.255457	0.841284
YGR271C-A	-0.224183	0.896682
YGR274C	0.204937	0.888094
YGR276C	0.243863	0.811694
YGR277C	-0.0272247	0.987229
YGR279C	0.0283733	0.977231
YGR280C	-0.0869121	0.954828
YGR282C	0.133696	0.875895
YGR283C	-0.0557241	0.977231
YGR284C	0.126185	0.89775
YGR285C	0.229132	0.71191
YGR286C	0.67358	0.289667
YGR287C	0.780436	0.274924
YGR289C	0.830608	0.716655
YGL256W	4.02246	2.81464e-98
YGL255W	1.79118	0.0320407
YGL254W	-0.547105	0.551951
YGL253W	0.390952	0.274924
YGL250W	-0.083716	0.970775
YGL248W	-0.103317	0.954215
YGL247W	0.142875	0.963691
YGL245W	0.178484	0.794951
YGL244W	-0.155311	0.888094
YGL243W	0.0530375	0.977231
YGL241W	0.0256663	0.987229
YGL240W	-0.513112	0.823101
YGL238W	-0.0787649	0.94086
YGL234W	0.271905	0.601446
YGL233W	-0.188271	0.89775
YGL232W	-0.121785	0.933904
YGL228W	0.0614112	0.957816
YGL227W	-0.0487171	0.977231
YGL226W	-0.0531201	0.977231
YGL225W	0.172328	0.835804
YGL220W	0.17764	0.889515
YGL216W	-0.20488	0.877193
YGL215W	0.580483	0.128054
YGL212W	-0.607531	0.402273
YGL211W	-0.248632	0.823101
YGL210W	0.197794	0.885831
YGL209W	0.355345	0.692491
YGL208W	0.12473	0.942546
YGL207W	0.0429788	0.968019
YGL205W	-0.412413	0.913308
YGL202W	0.313198	0.503515
YGL198W	0.00950209	0.99666
YGL197W	-0.115848	0.910411
YGL196W	0.465953	0.5072
YGL195W	-0.288372	0.460416
YGL191W	-0.166369	0.860988
YGL181W	-0.101613	0.931349
YGL180W	-0.00277775	0.999483
YGL178W	0.0714982	0.957994
YGL174W	-0.154017	0.940817
YGL172W	0.07751	0.944995
YGL171W	0.0191295	0.98845
YGL169W	-0.106145	0.944995
YGL166W	0.181146	0.910411
YGL162W	0.127831	0.959586
YGL160W	0.242885	0.841284
YGL159W	0.258637	0.847113
YGL157W	0.331485	0.407314
YGL156W	0.359766	0.606383
YGL155W	-0.114365	0.944995
YGL153W	-0.0160204	0.993872
YGL151W	-0.271852	0.707513
YGL148W	0.148117	0.888094
YGL145W	0.0226978	0.98845
YGL141W	-0.358773	0.623264
YGL139W	0.0152461	0.99042
YGL137W	0.236399	0.693362
YGL135W	0.225712	0.792359
YGL134W	0.23977	0.912718
YGL133W	-0.282905	0.841284
YGL130W	0.00672653	0.99757
YGL125W	-0.10019	0.912718
YGL123W	0.181963	0.855831
YGL119W	0.397205	0.618574
YGL117W	0.279575	0.763424
YGL116W	0.141808	0.896682
YGL115W	-0.02894	0.979548
YGL114W	-0.00442723	0.998685
YGL113W	0.182695	0.936897
YGL111W	-0.254458	0.737037
YGL106W	-0.13265	0.888094
YGL105W	0.0726559	0.952697
YGL103W	0.160556	0.888094
YGL101W	-0.193135	0.888094
YGL100W	-0.0145488	0.991644
YGL099W	0.341113	0.561146
YGL098W	-0.360129	0.74025
YGL097W	-0.102484	0.912718
YGL096W	-0.260443	0.888094
YGL093W	-0.149002	0.916163
YGL092W	0.0354914	0.97588
YGL090W	-0.802974	0.57625
YGL088W	0.0229586	0.998685
YGL086W	0.162203	0.965023
YGL085W	-0.3428	0.869031
YGL083W	0.143245	0.915294
YGL082W	-0.000582498	0.99988
YGL081W	0.559302	0.716655
YGL080W	-0.144306	0.900991
YGL079W	-0.0707023	0.973371
YGL073W	-0.431543	0.490378
YGL071W	-0.0826351	0.965023
YGL068W	0.063556	0.954828
YGL067W	0.378202	0.637581
YGL066W	-0.205595	0.86428
YGL063W	-0.487182	0.792359
YGL062W	0.260179	0.919785
YGL060W	0.074184	0.965023
YGL059W	0.0293127	0.98845
YGL058W	-0.188048	0.848715
YGL055W	0.120375	0.888094
YGL050W	-0.0177513	0.993872
YGL047W	0.0668547	0.973371
YGL045W	-0.159109	0.912718
YGL043W	-0.202987	0.788218
YGL041W-A	-0.169066	0.890924
YGL039W	0.599939	0.396436
YGL036W	-0.0275859	0.987224
YGL030W	0.218447	0.841284
YGL029W	0.266358	0.888094
YGL022W	0.29794	0.637581
YGL021W	0.160445	0.869667
YGL019W	0.131487	0.912525
YGL017W	-0.318841	0.841284
YGL016W	0.340297	0.650093
YGL014W	0.0716728	0.951125
YGL012W	0.261445	0.650093
YGL010W	-0.174502	0.921189
YGL006W	-0.0529586	0.970775
YGL002W	0.206702	0.891297
YGR003W	-0.2588	0.822975
YGR004W	0.256947	0.868699
YGR006W	-0.824884	0.274924
YGR007W	-0.0394129	0.977231
YGR012W	0.104842	0.944995
YGR013W	-0.113886	0.944587
YGR014W	0.041753	0.970775
YGR016W	-0.434899	0.848715
YGR017W	0.193981	0.888094
YGR019W	0.262273	0.707513
YGR021W	-0.0807511	0.958341
YGR023W	0.27475	0.834144
YGR026W	0.290871	0.637581
YGR028W	0.234169	0.834144
YGR029W	0.120251	0.916326
YGR031W	-0.186121	0.888094
[truncated: 3,292 more rows]
