# Supplementary material for: Decapping factor Dcp2 controls mRNA abundance and translation to adjust metabolism and filamentation to nutrient availability
Source: eLife journal article supplement (doi:10.7554/elife.85545), 2023-06-02
Supplement: fig6-data1 [file Figure 6 – source data 1.xlsx]

## Sheet: Sheet1
gene	dcp2 vs WT TE	gene_ID	dhh1 vs WT TE	gene_ID	dhh1dcp2 vs WT TE			Dhh1-dep	gene_ID	Dhh1-indep	gene_ID
YAL067C	-1.00736	YDL160C	-3.24804	YDR133C	-6.46482			n=100	YOR102W	n=441	YHR097C
YAL063C-A	-3.5448	YJR152W	3.57078	YEL017C-A	2.5215				YOR218C		YML128C
YAL063C	0.0598379	YBL075C	3.58598	YLR264W	1.92614				YOR121C		YNL133C
YAL054C	1.27341	YAL034C	3.11328	YNL014W	-3.3821				YOL150C		YGR032W
YAL049C	0.254102	YJR120W	-1.95003	YOR377W	-3.01245				YDL009C		YPL190C
YAL047C	-0.69614	YFL031W	1.4001	YKL209C	-3.07195				YOR084W		YHR138C
YAL046C	0.367306	YER186C	2.41103	YDR524C-B	1.62174				YDL039C		YPR017C
YAL044C	0.395714	YNL014W	-1.94343	YLR130C	-2.1312				YDL222C		YGR251W
YAL043C	-0.0728384	YDL222C	3.76573	YPR036W-A	1.26637				YHR033W		YBR085C-A
YAL040C	-1.46547	YDL039C	3.7521	YDL061C	1.40331				YLR174W		YDR169C
YAL039C	0.336551	YHR033W	2.63936	YMR122W-A	1.2364				YOR031W		YHL042W
YAL036C	0.118398	YLR174W	3.5207	YMR251W-A	1.21941				YCL021W-A		YBL078C
YAL034C	1.44226	YGR201C	2.05662	YKL096W-A	1.13616				YIL163C		YOR195W
YAL032C	-0.135229	YJR004C	2.35143	YHR033W	3.04708				YGL204C		YBR233W-A
YAL031C	-0.747367	YOR084W	2.61837	YFL026W	-5.30295				YJR004C		YDL043C
YAL029C	-0.752978	YHL016C	4.23244	YML056C	-0.953522				YBL075C		YBR197C
YAL026C-A	-0.410497	YCR089W	1.90595	YDR276C	1.31916				YPL114W		YBL028C
YAL026C	-0.0405951	YMR096W	1.45728	YFL034C-A	-1.56256				YJL216C		YMR244C-A
YAL025C	0.258492	YDR216W	1.62475	YIR031C	-2.70169				YMR181C		YKR085C
YAL024C	-0.213798	YGR087C	-2.77331	YDR086C	1.28695				YBR076C-A		YPL166W
YAL023C	-0.423384	YMR181C	2.07027	YOR120W	2.00113				YPR145C-A		YDR374W-A
YAL022C	-0.471989	YJL106W	2.60802	YLR395C	1.3868				YGR127W		YMR269W
YAL021C	0.261741	YIR029W	2.00311	YPL066W	-1.97486				YER150W		YER058W
YAL020C	-0.786562	YJL216C	4.36414	YDL197C	-2.3463				YOR120W		YGR008C
YAL015C	-0.00769009	YLL019C	1.10586	YHR001W-A	1.32593				YNL331C		YNL146C-A
YAL014C	0.204563	YER024W	1.48573	YLR271W	1.95473				YOR186W		YKR045C
YAL010C	-0.261291	YIR031C	1.53342	YNL118C	1.02097				YAL034C		YNR036C
YAL007C	0.10244	YLR092W	-1.54539	YNL031C	0.935177				YPR193C		YHR001W-A
YAL005C	0.28844	YER150W	2.04633	YOR210W	1.2332				YDR216W		YBR153W
YAL001C	-0.364624	YPR194C	1.38485	YGR169C-A	1.57987				YDL204W		YGL087C
YAR002C-A	0.0823251	YIL059C	2.06264	YOR349W	-2.1747				YCR014C		YOR308C
YAR007C	0.173123	YIL146C	1.34817	YJR004C	2.82679				YGR088W		YGR183C
YAR014C	-0.0611333	YPL272C	3.7482	YLR325C	0.824068				YJL106W		YLR068W
YAR018C	-0.137844	YKL187C	2.9589	YLL051C	-1.78311				YPR151C		YML010W
YAR019C	-0.631003	YJR154W	1.82867	YNL052W	1.01132				YLR297W		YMR318C
YAR023C	-1.74133	YPR184W	1.2767	YDR216W	1.73255				YDR070C		YBR188C
YAL064W-B	-2.17819	YFR026C	2.29503	YBR085C-A	1.5032				YPL223C		YJL116C
YAL062W	0.346934	YMR271C	1.71537	YOL109W	0.741608				YCR107W		YKL138C
YAL061W	1.0226	YAL054C	1.87954	YDR210W	1.18724				YKL187C		YGL187C
YAL060W	0.0966214	YOR031W	2.53077	YER053C-A	1.40548				YKL006C-A		YER035W
YAL059W	0.366946	YHL046C	2.65217	YHR204W	-1.60856				YAL054C		YER116C
YAL058W	-0.724263	YER103W	1.50832	YNL300W	1.05221				YDL079C		YER050C
YAL056W	-0.371053	YKR050W	1.30064	YNL079C	0.864927				YPL186C		YDL129W
YAL055W	-0.322025	YHL047C	1.50334	YDL067C	1.19596				YBL039W-B		YBR016W
YAL053W	-0.562128	YCL021W-A	2.67913	YLR110C	0.791974				YKL026C		YCL056C
YAL051W	-0.601185	YGR088W	1.76123	YGL204C	2.83478				YJL144W		YJR067C
YAL044W-A	0.111085	YDL237W	-0.604588	YCR020W-B	1.53368				YHR087W		YDR511W
YAL042W	-0.111792	YPR151C	1.48448	YKR045C	1.75252				YAR019W-A		YKR006C
YAL041W	-0.454129	YKL006C-A	1.09714	YFL031W	0.976227				YLL057C		YGR167W
YAL038W	0.0585613	YJR047C	0.989984	YGR183C	1.22372				YER046W		YOR223W
YAL037W	-0.57265	YIL023C	-0.659837	YPL250C	1.04793				YFR017C		YNL079C
YAL035W	0.388627	YGR127W	1.76649	YLL018C-A	1.91955				YLR178C		YJR050W
YAL034W-A	0.182693	YCR107W	1.43122	YML058W	0.843861				YPL230W		YER180C-A
YAL033W	-0.207034	YDR242W	1.10236	YDR332W	-2.08407				YOR173W		YNR004W
YAL030W	0.919821	YLL057C	1.97207	YNL087W	-0.921578				YEL073C		YJR034W
YAL028W	-0.604012	YKL026C	2.41935	YHR143W-A	1.22335				YGR161W-C		YHR148W
YAL027W	0.094925	YPL258C	1.45365	YOR084W	3.72222				YDR275W		YER175C
YAL019W	-0.203139	YPR091C	-0.732254	YMR256C	1.13163				YPR184W		YML094W
YAL017W	-0.161635	YLL060C	0.928187	YLR294C	-6.73247				YIR016W		YJL124C
YAL016W	0.399144	YDR534C	2.73114	YIL138C	0.958279				YPL250C		YJL184W
YAL013W	0.0021996	YBR004C	-1.03493	YNL024C-A	1.28607				YMR194C-B		YIL065C
YAL012W	0.204699	YOR303W	-0.673448	YLR452C	-1.19992				YIL146C		YGR268C
YAL011W	0.159623	YLR052W	0.69971	YDL231C	-1.78786				YFL031W		YOL123W
YAL009W	-0.565461	YPR193C	1.55998	YNL070W	1.12111				YGR201C		YKL002W
YAL008W	0.370806	YMR103C	-1.72025	YBR074W	-1.0104				YLR437C		YJR060W
YAL004W	5.34727	YGL096W	2.2161	YDR174W	-0.823977				YER161C		YDR363W-A
YAL003W	0.245488	YMR219W	0.484701	YGL256W	-1.50246				YDL243C		YHR152W
YAL002W	-1.00034	YJR155W	-3.81528	YKR069W	-1.68191				YPL014W		YBR234C
YAR002W	0.241934	YHR056C	-0.580126	YNL111C	0.762972				YMR105C		YMR311C
YAR003W	0.405623	YLL055W	1.33039	YJL127C-B	2.02199				YKL093W		YDR031W
YAR008W	-0.23661	YIL085C	-0.694598	YHR199C	-1.163				YOR028C		YHR116W
YAR015W	0.114001	YOL063C	-0.666153	YJL124C	0.980425				YFL030W		YNL215W
YAR019W-A	2.90962	YHR134W	0.945365	YLR038C	1.06504				YER139C		YLL018C-A
YAR027W	-0.186857	YMR040W	1.45572	YBR109C	0.723378				YLL060C		YMR188C
YAR028W	0.114724	YOR298W	2.93503	YHR056C	-0.991103				YLL019C		YER100W
YAR029W	-0.47899	YMR085W	4.87413	YBR004C	-1.51013				YML100W		YML095C
YAR031W	0.131305	YOR120W	1.95669	YPL135W	0.909505				YAL061W		YIL138C
YAR033W	-0.4136	YOL051W	0.534663	YDR147W	-1.29736				YPR005C		YFL023W
YAR035W	-0.140164	YHR211W	1.10468	YOL039W	0.721577				YLR177W		YDL181W
YAR042W	-0.321232	YHR028C	-0.466078	YNL131W	0.75993				YDR345C		YGL222C
YAR050W	-0.350364	YOR079C	-0.634442	YNL249C	-1.89472				YJR153W		YER071C
YAR071W	-0.655721	YKL132C	1.52061	YBL075C	2.46162				YDR488C		YHR132W-A
YBL113C	-0.910574	YGR055W	-0.463237	YJL189W	0.774355				YMR090W		YNL307C
YBL107C	0.318801	YBR036C	-0.476434	YMR002W	0.739427				YER186C		YDR162C
YBL106C	-1.38288	YKL032C	0.471241	YBL017C	-0.756005				YIL162W		YKL061W
YBL105C	-0.079683	YNR067C	-0.48955	YER138W-A	-2.81806				YGR230W		YGL043W
YBL104C	-0.150867	YGL204C	0.83949	YOL063C	-1.27028				YIL059C		YCR020W-B
YBL103C	0.358192	YLR164W	2.09248	YHR215W	-0.644406				YOL113W		YDR276C
YBL101C	0.0102867	YGR227W	-0.589413	YGL255W	-1.03961				YNL009W		YLR192C
YBL093C	0.509046	YNL039W	0.563501	YAR071W	-0.655482				YER175W-A		YNL015W
YBL091C-A	0.373695	YDR294C	-0.563961	YJR137C	-0.7796				YDR263C		YOL111C
YBL091C	0.214826	YPR026W	1.0032	YFR030W	-0.816706				YER103W		YOR294W
YBL088C	-0.998297	YDR275W	0.849097	YIR023W	-1.1233				YPL024W		YOR052C
YBL087C	0.635977	YPL223C	1.71318	YBL060W	-1.46557				YKL054C		YHR088W
YBL086C	0.225847	YMR100W	-0.587371	YOR303W	-0.831081				YLR211C		YNL185C
YBL084C	-0.684691	YJR137C	-0.450643	YDR328C	0.749599				YJR082C		YPL173W
YBL080C	-0.115263	YCR014C	1.5996	YJR048W	0.827096				YHL009C		YLR455W
YBL078C	1.29436	YMR001C-A	-2.40649	YDL181W	1.18159				YMR271C		YNL064C
YBL076C	-0.0872017	YDR505C	0.471681	YMR181C	2.27428				YDR453C		YDR059C
YBL075C	3.03391	YKL171W	0.798106	YBL106C	-1.92555				YGR021W		YBR022W
YBL074C	-0.444752	YKL084W	-0.70336	YOR052C	0.910624						YLR220W
YBL072C	0.28801	YDL052C	-0.504348	YBL071W-A	1.14874						YJR099W
YBL070C	-0.131433	YJL002C	-0.467653	YFL049W	-1.10759						YNR024W
YBL067C	0.0820195	YNR044W	0.627183	YCR106W	-1.13292						YMR303C
YBL066C	-0.286068	YHR096C	-0.703541	YGR037C	0.705064						YKL082C
YBL064C	-0.202253	YOR047C	0.565746	YIL129C	-0.826686						YLR023C
YBL061C	0.0677126	YOL113W	0.776341	YLR390W-A	0.664334						YMR161W
YBL059C-A	0.43996	YGL038C	-0.529451	YBL028C	1.24467						YMR091C
YBL057C	0.038471	YPL115C	0.508812	YAL040C	-0.949867						YNL244C
YBL055C	-0.0395681	YDR453C	1.16221	YNL135C	0.724824						YPL257W
YBL052C	-0.681749	YML067C	-0.491876	YDR160W	-1.51442						YIL156W-B
YBL051C	-0.00893134	YBL089W	-0.694806	YDR225W	0.642809						YBL021C
YBL047C	0.197222	YCL004W	1.01361	YOR142W	0.672922						YNL208W
YBL045C	0.194019	YNL331C	1.2704	YHR120W	-1.2725						YBR282W
YBL042C	-0.391953	YOL082W	0.737981	YHR162W	0.663258						YMR256C
YBL040C	-0.297903	YFR020W	-1.67863	YNL221C	-1.04485						YJR048W
YBL039C	0.198315	YPR005C	0.929469	YGR161W-C	1.15647						YLR038C
YBL036C	0.0609618	YBR295W	0.612617	YKL156W	0.637275						YPL146C
YBL035C	0.0264467	YBR243C	-0.536592	YLR262C-A	0.908761						YLL033W
YBL034C	-0.138344	YFR030W	-0.459119	YGR181W	1.06262						YKL218C
YBL033C	-0.0626333	YPL186C	1.75369	YCR073C	-1.12522						YDL120W
YBL030C	0.279396	YGL062W	-0.459198	YJL002C	-0.698964						YKL170W
YBL029C-A	0.113158	YGR032W	0.595176	YCL035C	0.666301						YPL013C
YBL028C	1.16735	YMR318C	0.390187	YDL184C	2.17022						YOR111W
YBL023C	0.122238	YPR198W	-0.590747	YOR342C	-1.00452						YDL241W
YBL022C	0.31578	YBR074W	-0.511882	YBL088C	-1.17026						YNL007C
YBL021C	0.755698	YDR307W	-0.530716	YLR266C	-1.7767						YDR412W
YBL018C	-0.173151	YBL095W	-0.70496	YLR192C	0.703042						YDL064W
YBL017C	-0.713316	YDR456W	-0.490132	YOR009W	-2.50129						YNR022C
YBL014C	-0.325478	YJR117W	-0.47195	YOR336W	-0.95468						YDL065C
YBL010C	0.000247768	YKL054C	0.486209	YLR173W	-1.23772						YFL010C
YBL007C	0.420525	YMR090W	1.11693	YAL034C	1.79207						YML058W
YBL006C	0.351054	YML118W	1.31613	YMR006C	-0.901737						YMR002W
YBL003C	0.549108	YDL214C	2.21959	YPL249C-A	0.676551						YKL122C
YBL001C	0.513807	YGL022W	-0.524958	YDL039C	3.71324						YER092W
YBR001C	-0.129877	YPL252C	0.513956	YPR122W	-1.23515						YDR308C
YBR002C	-0.1964	YDL128W	-0.383897	YFR005C	-1.00286						YDR077W
YBR004C	-1.78846	YLR378C	-0.450666	YOR246C	-0.927733						YFL014W
YBR007C	-0.402692	YNL322C	-0.401538	YGL223C	-1.03936						YDR210W
YBR008C	0.924478	YGR131W	1.42634	YHL035C	-1.49113						YKL192C
YBR009C	0.597101	YGR236C	3.82998	YBR291C	-0.970591						YDR328C
YBR011C	0.640394	YKL034W	-0.512417	YBL113C	-0.771472						YBR252W
YBR014C	-0.238483	YHL032C	0.838263	YJL062W-A	1.05274						YOL109W
YBR015C	-0.467237	YMR202W	-0.41916	YOL040C	0.557898						YBR058C-A
YBR017C	-0.182703	YJR075W	-0.495129	YML031W	-0.901481						YBR269C
YBR018C	-0.229464	YLR403W	0.422957	YER087C-B	0.776292						YFR033C
YBR019C	-1.76407	YHR139C	1.84638	YKL117W	0.605347						YHR039C-A
YBR023C	-0.162264	YOR175C	-0.455662	YNL015W	0.786499						YPR201W
YBR025C	0.227777	YDR293C	0.423622	YJR006W	-0.985561						YMR174C
YBR026C	0.0636444	YER046W	1.00822	YOL159C-A	1.64449						YGR058W
YBR028C	-0.267469	YJL213W	4.2333	YGL039W	-0.995146						YLR292C
YBR029C	-0.435872	YKR053C	1.81539	YGR260W	-0.833674						YDR381C-A
YBR034C	-0.0339939	YPL176C	-0.405876	YDR077W	0.616061						YDR468C
YBR035C	0.327726	YAL064W-B	-3.13534	YJL056C	-1.44763						YER104W
YBR036C	-0.34595	YMR274C	-0.71552	YOR034C	-1.09813						YKL016C
YBR037C	0.101535	YDL204W	1.68402	YER048W-A	0.901135						YER053C-A
YBR042C	-0.575745	YDR028C	0.576387	YAL029C	-0.821649						YBL001C
YBR043C	0.286145	YDR003W-A	-4.08478	YDL222C	3.68125						YGR280C
YBR044C	-0.457717	YJL153C	0.606375	YGR118W	0.511366						YOL052C-A
YBR045C	-0.820088	YML123C	-0.448246	YBR009C	0.568029						YPL271W
YBR046C	0.32216	YOR015W	2.2072	YBR163W	-1.44068						YDR002W
YBR049C	0.351074	YCR065W	0.523799	YJR120W	-2.29422						YCL028W
YBR050C	-0.677345	YKL175W	-0.503833	YBL078C	1.1947						YNL111C
YBR052C	0.266498	YGL007C-A	-1.30796	YDL014W	0.707986						YBL099W
YBR053C	0.0840529	YPL250C	0.577331	YOR189W	1.20815						YCL035C
YBR055C	-0.427676	YDR504C	-3.00579	YGR127W	2.09324						YAL030W
YBR057C	0.116499	YLR402W	-1.33429	YBL087C	0.631191						YHR092C
YBR058C	-0.0748515	YNL097C-B	-1.3251	YGL022W	-0.581071						YNL113W
YBR058C-A	1.13881	YEL031W	-0.440094	YOR122C	0.655926						YJR055W
YBR059C	-0.179475	YNR060W	-0.937808	YFL010C	0.624153						YNL147W
YBR060C	-0.261951	YHR188C	-0.522202	YPL089C	-0.989314						YPR093C
YBR061C	-0.199324	YCR061W	-0.492238	YNL244C	0.605674						YBR146W
YBR062C	0.0851015	YML052W	-0.419427	YOR204W	0.516967						YDR460W
YBR063C	-1.37379	YHR103W	0.451374	YIL085C	-0.835507						YPL108W
YBR065C	0.0288812	YPR127W	0.803307	YOL158C	-2.76089						YNL143C
YBR066C	-0.0150022	YNR069C	1.46657	YNR067C	-0.735972						YDL061C
YBR067C	0.159379	YHL017W	-0.473937	YER131W	0.530075						YDR178W
YBR068C	0.144663	YPR164W	-0.611537	YKL006C-A	1.36506						YBR011C
YBR069C	-0.0454218	YOL085W-A	4.50682	YMR190C	-1.2277						YER002W
YBR070C	-0.440162	YDL215C	0.515886	YKL054C	0.560724						YOR122C
YBR076C-A	2.82074	YHR192W	-0.529059	YOR293W	0.537378						YGR203W
YBR077C	0.396386	YDR345C	0.623606	YOR002W	-0.740275						YJL133C-A
YBR079C	-0.100701	YDR406W	1.01968	YOR294W	0.774599						YOR327C
YBR080C	0.215562	YHL009C	0.70713	YPR165W	0.654529						YGR038W
YBR081C	0.094854	YCR075C	-0.751337	YJL143W	0.778699						YJL166W
YBR082C	0.400872	YKR069W	-0.807933	YBR011C	0.502978						YOR189W
YBR084C-A	0.195281	YDL018C	-0.493154	YMR161W	0.787094						YOR142W
YBR085C-A	1.49068	YDL243C	0.979111	YNL255C	0.555206						YNL031C
YBR086C	-0.079313	YJL059W	-0.580226	YIL046W	-0.96537						YGL166W
YBR088C	-0.121415	YHR042W	-0.482297	YAL002W	-1.08298						YNL162W-A
YBR089C-A	0.422593	YKL207W	-0.404311	YLR008C	0.775766						YNL260C
YBR091C	0.42181	YAR002W	0.368762	YPR114W	-0.775844						YER030W
YBR092C	-0.361987	YDR047W	0.387164	YBL003C	0.583867						YNL086W
YBR093C	-0.236443	YGR129W	0.752942	YBR173C	0.710863						YDR083W
YBR095C	-0.00490225	YNR032W	-0.507714	YLR190W	0.690097						YDR441C
YBR099C	-3.8324	YLR190W	0.474937	YLR455W	1.00386						YMR193W
YBR101C	0.34931	YLR130C	-0.513956	YDR345C	0.709069						YKL167C
YBR102C	-0.345102	YOL062C	-0.413477	YPL189C-A	1.13615						YIR037W
YBR105C	0.169808	YDL079C	1.82384	YER028C	-2.38206						YLL009C
YBR107C	-0.316344	YOR324C	0.493566	YLR421C	0.706286						YBR056W-A
YBR109C	0.704705	YCR024C-A	0.341347	YLL019C	0.790198						YER131W
YBR111C	0.362364	YDR285W	1.13796	YEL027W	0.623851						YLR395C
YBR112C	-0.0508386	YGL209W	0.472957	YGL029W	1.08542						YGR165W
YBR115C	0.226831	YDR483W	-0.408804	YPR184W	1.07964						YDR482C
YBR120C	0.150785	YBR157C	0.745068	YPL216W	-1.45425						YGR215W
YBR121C	-0.0845166	YLR241W	-0.440713	YNR036C	0.793898						YNL135C
YBR122C	0.604214	YEL009C	-0.521777	YKL188C	-1.88334						YPR036W-A
YBR123C	0.147774	YHR080C	0.813343	YPL074W	-1.02334						YDR252W
YBR125C	-0.293776	YFL054C	0.982363	YFR020W	-2.40441						YDR356W
YBR126C	0.418955	YGR139W	4.63228	YPR164W	-0.873307						YNR037C
YBR127C	0.210143	YKR102W	1.46917	YMR318C	0.570316						YOR265W
YBR128C	0.487593	YIR020C	-3.86357	YDL130W-A	1.03063						YMR260C
YBR129C	0.458638	YFL053W	1.60762	YDL133C-A	1.82875						YLR019W
YBR130C	0.309119	YDR415C	-0.464672	YGL070C	0.794166						YKL156W
YBR132C	0.353166	YOL060C	-0.402601	YEL054C	0.502603						YJR017C
YBR133C	-0.676147	YGL228W	-0.349535	YDR377W	0.717841						YOR281C
YBR138C	0.215839	YKL068W	0.385321	YER035W	0.969036						YGR181W
YBR140C	0.0937796	YOR152C	0.793219	YHR087W	1.27068						YHR121W
YBR141C	0.183432	YGR188C	-0.775878	YDR336W	-1.62333						YGR020C
YBR143C	0.15635	YPL230W	1.26809	YPR170W-B	0.68266						YJL003W
YBR150C	0.290413	YML007C-A	-2.08741	YGR008C	1.05572						YPL135W
YBR154C	0.0885946	YMR163C	-0.648298	YMR202W	-0.552138						YHR089C
YBR156C	-0.643594	YER045C	0.470624	YER110C	-0.48854						YBR173C
YBR157C	-0.591343	YNL115C	-0.509171	YKL201C	-1.13146						YER120W
YBR162C	-0.0501117	YJL177W	0.296171	YIR039C	-1.20258						YEL017C-A
YBR164C	0.18021	YGR119C	0.394207	YKL017C	-1.14509						YCL005W-A
YBR166C	-0.0606416	YGR289C	1.25621	YOL068C	-0.886894						YMR251W-A
YBR167C	0.391895	YML115C	-0.375985	YHL017W	-0.911164						YDR119W-A
YBR169C	0.16313	YEL049W	1.78045	YBR146W	0.750449						YDR524C-B
YBR170C	-0.148784	YFL050C	-0.991354	YOL055C	-1.10638						YLR223C
YBR172C	-0.456776	YIL049W	-0.808637	YPL166W	1.70979						YOR159C
YBR173C	0.648842	YAL058W	-0.539641	YBR237W	-1.16263						YEL026W
YBR177C	0.0110554	YNL225C	-0.5138	YNL064C	0.482544						YLR025W
YBR179C	-0.00704598	YHR057C	-0.512546	YOR026W	-1.08195						YJR104C
YBR181C	0.243075	YNL280C	-0.402967	YIL013C	-1.61745						YEL054C
YBR182C	-0.376713	YBR229C	-0.402907	YJL166W	0.794582						YBR109C
YBR185C	0.0531694	YGL014W	0.392665	YGR070W	-1.2521						YBR254C
YBR188C	0.488003	YIR006C	0.481594	YPR085C	-1.20334						YKL049C
YBR193C	0.415368	YOR227W	0.490741	YMR176W	-0.973071						YOR125C
YBR195C	-0.460458	YER161C	0.496592	YLR043C	0.554014						YJR010C-A
YBR196C	0.0719937	YGL063W	0.714019	YIR007W	-1.14814						YPR063C
YBR197C	0.960485	YPR013C	0.749142	YIR019C	-1.78541						YER095W
YBR198C	-0.189414	YOR018W	-0.448778	YGR146C	0.988477						YGL098W
YBR201C-A	0.885281	YDR072C	-0.422938	YDR530C	-0.99082						YDR034W-B
YBR204C	0.418305	YLL038C	-0.567565	YNL331C	1.93414						YCR028C-A
YBR208C	-0.409865	YDR070C	1.29396	YNL245C	1.17961						YER053C
YBR211C	0.0621745	YFL026W	-0.374192	YJL130C	-0.448608						YNL245C
YBR216C	0.335719	YPL270W	-0.373383	YNR065C	-0.954123						YDR377W
YBR218C	-0.088564	YDL066W	-0.320536	YLL009C	1.03706						YNL151C
YBR221C	0.54377	YFL030W	1.01002	YOR222W	-0.668077						YMR122W-A
YBR222C	0.0623676	YOR377W	-0.813046	YLR178C	1.19102						YDR197W
YBR223C	-0.596402	YER140W	-0.638838	YMR242C	0.47313						YLR043C
YBR229C	-0.642141	YGL257C	-0.558857	YGR056W	-0.789304						YPR165W
YBR230C	0.1177	YLR191W	-0.465433	YDR034C	-0.789655						YEL050C
YBR231C	0.276436	YLR306W	0.638326	YOR031W	2.91471						YNL300W
YBR234C	0.529878	YMR303C	0.28171	YPR091C	-0.795885						YGL108C
YBR236C	0.0886198	YGL124C	0.526619	YBR048W	0.492668						YLR009W
YBR238C	-0.01367	YLR361C	-0.468967	YDR226W	0.509124						YGL058W
YBR239C	0.0128896	YOR067C	-0.45429	YOR202W	0.939713						YLR221C
YBR240C	0.168498	YHR115C	0.397048	YNL307C	0.532951						YJL062W-A
YBR241C	-0.380946	YJL193W	-0.680196	YBR234C	0.544111						YKL096W-A
YBR243C	-0.396658	YDR259C	0.923113	YER150W	2.0036						YNL090W
YBR245C	0.240257	YIR016W	1.54795	YLR287C-A	0.610211						YKR035W-A
YBR247C	0.155367	YNL157W	0.518774	YPR133W-A	0.88436						YJL127C-B
YBR248C	-0.0537147	YLL012W	-0.68277	YOL077W-A	0.795298						YOR204W
YBR249C	0.160701	YJL016W	0.521841	YMR162C	-0.788295						YGL242C
YBR254C	0.537363	YKL093W	1.31835	YMR260C	0.491171						YBR009C
YBR255C-A	0.373311	YLR001C	-0.462151	YGR270W	-0.621707						YLR361C-A
YBR256C	-0.0548532	YBL020W	-0.655598	YKL138C-A	1.46689						YBR122C
YBR258C	0.0369956	YJL051W	-0.45508	YOR010C	-3.2227						YIL157C
YBR260C	-0.305272	YHR132C	-0.366901	YMR230W	0.468775						YMR132C
YBR261C	0.378358	YHR026W	-0.303894	YJR147W	-1.36029						YKL117W
YBR262C	0.516187	YGL105W	0.325687	YMR103C	-2.90189						YDR525W-A
YBR264C	-0.345582	YDR488C	0.554476	YDR525W-A	0.792683						YML108W
YBR269C	0.584389	YPR123C	-4.68723	YEL026W	0.669905						YNL099C
YBR270C	-1.21129	YIL061C	0.52813	YPR169W	-0.615368						YGR037C
YBR272C	-0.296308	YPL011C	-0.470694	YDR421W	-1.0478						YPL127C
YBR273C	0.380045	YDR169C	0.476915	YJL158C	0.439051						YNL070W
YBR275C	0.0569718	YDR135C	-0.593916	YJR060W	0.671081						YDR092W
YBR276C	-0.498649	YNL307C	0.309673	YOR023C	-0.856433						YNL052W
YBR280C	0.149083	YLR297W	0.67303	YDR322C-A	0.762099						YNL118C
YBR281C	-0.00403799	YML031W	-0.535454	YHR188C	-0.597757						YDR054C
YBR283C	-0.249212	YNL066W	-0.408386	YJR131W	-0.745968						YOL067C
YBR288C	-0.0441429	YNL323W	-0.352774	YJL177W	0.461904						YGR162W
YBR291C	-0.74631	YGL180W	0.528807	YOR219C	-0.859158						YNL131W
YBR292C	-3.43489	YML128C	0.828104	YKL084W	1.26283						YPL249C-A
YBR296C	-0.290258	YER115C	-0.939033	YMR303C	0.610384						YOR293W
YBR298C	-2.08014	YMR037C	0.497971	YLR363C	0.752915						YBL087C
YBL102W	0.453508	YLR437C	0.500843	YML116W	-0.915461						YEL048C
YBL099W	0.528196	YDL155W	0.417132	YPL271W	0.66001						YHR005C-A
YBL098W	-0.397566	YER125W	0.293904	YER161C	0.934446						YDL067C
YBL097W	0.30736	YCR017C	-0.463963	YDL085C-A	1.27561						YHR059W
YBL095W	0.0751439	YNL064C	0.288794	YJL159W	0.528049						YLR421C
YBL092W	0.0252036	YKL165C	-0.371894	YDL004W	0.593056						YDR298C
YBL090W	0.438944	YBL048W	-3.00321	YJR124C	-0.967394						YOL143C
YBL089W	-0.711246	YIL115C	0.351156	YCR028C-A	0.607162						YLR264W
YBL085W	-0.414972	YDL154W	-2.5471	YJL197W	-0.695846						YGL044C
YBL081W	0.0866783	YCR095W-A	-2.19401	YIL162W	0.654456						YDL014W
YBL079W	-0.495825	YAL040C	-0.45882	YKR027W	-0.868582						YLR435W
YBL071W-A	0.984455	YOL013C	-0.412665	YLR023C	0.803991						YHR143W-A
YBL068W	0.39467	YJR126C	-0.398066	YLR019W	0.851865						YER048W-A
YBL063W	-0.7305	YOR002W	-0.395656	YOL011W	0.714195						YDR260C
YBL060W	-1.3723	YGL203C	-0.349376	YOL012C	0.677118						YDL004W
YBL059W	0.3309	YJL124C	0.346247	YGR188C	-1.3351						YDR020C
YBL058W	0.24951	YDL043C	0.449764	YGR202C	-0.696535						YOL012C
YBL056W	0.383819	YPL190C	0.499609	YDR150W	-0.47276						YCR071C
YBL054W	0.22906	YPL016W	0.421469	YNL030W	0.464143						YLR287C-A
YBL050W	0.150428	YMR190C	-0.540234	YMR185W	-0.790365						YPR100W
YBL048W	-5.21549	YGL005C	-0.457743	YOR018W	-0.88354						YLR008C
YBL046W	-0.14468	YNR039C	-0.414813	YLL038C	1.03702						YLR110C
YBL043W	-0.946242	YBR016W	0.374291	YNL153C	0.730643						YER137C
YBL041W	0.252342	YOR019W	1.19405	YBL002W	0.517341						YDR493W
YBL039W-B	1.10319	YAL007C	-0.296356	YFL005W	0.522528						YDR322C-A
YBL038W	0.341222	YPL049C	0.36371	YLR297W	1.47816						YDR088C
YBL037W	-0.359004	YOL072W	-0.498528	YJL133C-A	0.85562						YJL143W
YBL032W	0.0598928	YJL062W	-0.359523	YHR039C-A	0.461655						YDR086C
YBL031W	0.223363	YBL040C	-0.331094	YLR174W	3.01891						YJR069C
YBL029W	-0.357683	YJL042W	0.3316	YER066W	-1.72125						YGL191W
YBL027W	0.151632	YMR213W	0.541661	YBR221C	0.481555						YML081C-A
YBL026W	-0.128693	YLL015W	-0.491934	YGR170W	-0.810791						YKL058W
YBL025W	0.599775	YPL193W	0.508112	YDL171C	-0.520306						YGL070C
YBL024W	-0.0101434	YPL075W	0.423781	YDR178W	0.669247						YKL137W
YBL020W	-0.749936	YHR155W	-0.552726	YEL024W	0.627327						YBL025W
YBL019W	-1.18273	YHR045W	-0.553813	YJR017C	0.683923						YPL183W-A
YBL016W	0.0739584	YLR173W	-0.497001	YOR328W	-1.35774						YKL056C
YBL015W	-0.036685	YHR117W	-0.39807	YML023C	-1.17142						YOR257W
YBL011W	-0.104357	YIL129C	-0.395895	YML030W	0.818067						YJL072C
YBL009W	-0.138629	YOR288C	-0.390494	YNR060W	-1.84176						YJL218W
YBL008W	-0.0589246	YOL145C	-0.370627	YLR292C	0.673859						YDR378C
YBL005W	-0.649165	YPL053C	-0.350717	YBR092C	-0.434488						YNL137C
YBL004W	-0.251235	YNL004W	0.319294	YKL192C	0.546701						YOR065W
YBL002W	0.390029	YMR070W	0.362661	YML067C	-0.67217						YGR209C
YBR003W	-0.36543	YBR006W	0.457865	YPL151C	-0.912407						YOL133W
YBR005W	-0.459713	YOR235W	2.69068	YHR150W	-1.21005						YIR009W
YBR006W	-0.133078	YLR088W	-0.39485	YBR058C-A	0.922219						YLR325C
YBR010W	0.426135	YNR055C	-0.343232	YGL031C	0.435527						YOL077W-A
YBR016W	0.512584	YPL119C	0.691344	YLR384C	-0.45425						YMR286W
YBR020W	-1.64492	YFR022W	0.722791	YDR444W	-0.948154						YLL041C
YBR021W	-0.479351	YPL014W	0.804626	YGR020C	0.598377						YER170W
YBR022W	0.550225	YNL211C	0.971996	YOR389W	-1.16205						YDR529C
YBR024W	-0.150021	YER180C	1.9225	YOL138C	-0.903018						YDL160C-A
YBR030W	-0.903787	YOR053W	-2.51606	YPL022W	-0.72059						YJR135W-A
YBR031W	0.295582	YOR321W	-0.374192	YDR135C	-0.529574						YDR163W
YBR033W	0.0302815	YBR003W	-0.346302	YGR210C	-0.605134						YBR162W-A
YBR038W	0.275167	YLR113W	0.281758	YJL092W	-0.893724						YDR139C
YBR039W	0.315548	YPR008W	0.439332	YDR002W	0.503035						YGR118W
YBR041W	-0.368938	YCL048W	-1.68494	YGL187C	0.652618						YOR210W
YBR047W	-0.419437	YML076C	-0.456221	YHR096C	-1.29994						YKL138C-A
YBR048W	0.399473	YDL072C	-0.344344	YHL033C	0.464951						YFR049W
YBR054W	0.284675	YBR234C	0.33473	YCR081W	-0.723259						YGR169C-A
YBR056W	0.0909871	YJL080C	0.362055	YOR005C	-1.11025						YBL093C
YBR056W-A	1.58164	YOR372C	0.3741	YLR221C	0.654544						YOR045W
YBR071W	0.307469	YIL112W	0.546343	YDR466W	-0.793182						YJL001W
YBR072W	0.647032	YIL169C	0.556829	YOR363C	-0.951404						YLR406C
YBR073W	-0.136893	YBR076C-A	1.3654	YOL164W	-1.43165						YHR162W
YBR074W	-1.02994	YDR414C	-0.439038	YGL043W	0.538928						YNL122C
YBR076W	-0.443786	YDR517W	-0.383398	YER041W	-1.38636						YLL014W
YBR078W	0.309847	YLL056C	1.18039	YLR448W	0.451477						YHR177W
YBR083W	-0.293715	YMR171C	-0.461834	YBL020W	-0.767126						YJL096W
YBR084W	0.191089	YCL049C	-0.407702	YJR069C	0.620913						YBR262C
YBR085W	-0.158167	YBR103W	-0.386208	YDL237W	-0.620271						YGL080W
YBR087W	-0.262917	YPR105C	-0.348387	YGR093W	-0.750187						YLR204W
YBR094W	-0.427516	YGL225W	-0.322305	YLR437C	0.936245						YDR079W
YBR096W	-0.42669	YPL232W	0.402149	YGR162W	0.434843						YDL130W-A
YBR097W	-0.250283	YPR017C	0.511904	YMR180C	-1.07701						YDR510W
YBR098W	-0.793589	YPR145C-A	1.42231	YGR168C	-1.19433						YNL024C-A
YBR103W	-0.451557	YNR056C	2.92852	YLR363W-A	1.04492						YOL159C-A
YBR104W	0.00580437	YDL095W	-0.348107	YDR298C	0.604987						YBR230W-A
YBR106W	-0.0817195	YPL221W	-0.337131	YMR065W	-2.13386						YJL191W
YBR108W	-0.179588	YPL246C	-0.327822	YKR006C	0.633383						YCR020C-A
YBR110W	-0.485121	YOR173W	1.45814	YPL145C	0.445233						YML030W
YBR111W-A	0.195127	YPR054W	3.76698	YER030W	0.72789						YDR462W
YBR114W	-0.466821	YJR079W	4.03832	YJR149W	-1.45959						YKL063C
YBR118W	0.205556	YCR106W	-0.526968	YEL053C	-0.704438						YPR073C
YBR119W	-0.0452911	YIL030C	-0.414089	YKL170W	0.78451						YJL104W
YBR131W	-0.306806	YPL199C	0.31839	YDL081C	0.505623						YOL039W
YBR135W	0.281477	YPR186C	0.52243	YEL025C	-0.93247						YNL153C
YBR136W	-0.377065	YJL020C	0.528776	YGR038W	0.617772						YCR027C
YBR137W	0.0309943	YCR045W-A	-1.20793	YFR033C	0.712734						YDL123W
YBR139W	-0.075377	YAL056W	-0.441774	YNR013C	-0.503489						YBR221C
YBR141W-A	1.9387	YNL305C	-0.391617	YHR148W	0.691837						YDL002C
YBR142W	-0.0123788	YBR287W	-0.364594	YIL015W	-1.3085						YPR116W
YBR145W	-0.0732279	YGL043W	0.305455	YPL078C	0.482349						YPL189C-A
YBR146W	0.917523	YBR256C	0.352868	YER072W	0.465961						YPR143W
YBR147W	0.0990569	YAR035W	0.757084	YGR024C	-0.862947						YPL098C
YBR148W	-0.187586	YGL027C	-0.298017	YER088C	-0.612608						YLR363C
YBR149W	0.121759	YCR037C	0.496389	YLR388W	0.488783						YKR014C
YBR151W	0.272052	YER172C	0.373146	YPR135W	-0.646339						YPL239W
YBR152W	0.0422975	YLR016C	0.489458	YDR441C	0.720469						YDR225W
YBR153W	0.533655	YOR113W	0.512856	YML082W	-0.728465						YBL003C
YBR155W	0.431388	YOR336W	-0.355981	YJL193W	-1.07653						YFL005W
YBR158W	-0.50822	YER001W	-0.405242	YCL005W-A	0.611659						YPL046C
YBR159W	-0.0501958	YOR292C	-0.626886	YGL191W	0.561031						YKL053C-A
YBR160W	0.321651	YML104C	-0.528926	YJR085C	0.58582						YLR363W-A
YBR161W	-0.193326	YOL107W	-0.437386	YNL088W	-0.575886						YER072W
YBR162W-A	0.868454	YLR071C	-0.349379	YOR045W	0.69817						YDL081C
YBR163W	-1.23072	YJL094C	-0.421287	YBL019W	-1.21985						YNR007C
YBR165W	0.0974034	YBR159W	-0.288918	YHL023C	-0.799153						YEL024W
YBR168W	-0.221823	YIL010W	0.427582	YBR030W	-0.965383						YDL006W
YBR171W	0.311996	YJL052W	-0.325814	YLR247C	-0.790286						YJL189W
YBR175W	0.0154757	YIR041W	3.13545	YJL062W	-0.640535						YEL027W
YBR176W	-0.0878067	YOR081C	-0.396584	YOR065W	0.542516						YDL217C
YBR183W	0.0517288	YGR199W	-0.361057	YOL052C-A	1.45907						YJR085C
YBR184W	-0.445348	YMR262W	-0.500351	YDR511W	0.782062						YBL071W-A
YBR186W	-1.73389	YGR216C	3	YPR105C	-0.618805						YOR202W
YBR187W	0.223579	YLL051C	-0.415375	YOL123W	0.442541						YNR063W
YBR189W	0.111585	YJL091C	-0.372637	YKL101W	-0.536996						YFR032C-A
YBR192W	0.243833	YLR134W	-0.307071	YMR016C	-0.771816						YPL145C
YBR194W	0.151392	YIL137C	-0.284582	YKL198C	-0.825341						YGL029W
YBR199W	0.00540632	YJL185C	0.88811	YJR110W	-1.01301						YLR275W
YBR200W	0.0394223	YJR046W	-0.404396	YOL140W	-0.732558						YER087C-B
YBR201W	0.36492	YFR017C	1.01073	YOL159C	-1.07846						YDL085C-A
YBR202W	-0.162185	YDL073W	-0.459274	YBR229C	-0.59943						YFR008W
YBR203W	-0.410668	YPL231W	-0.370198	YDR008C	2.94775						YPR133W-A
YBR205W	-0.0203442	YOL019W	-0.296544	YBR133C	-0.624054						YPR170W-B
YBR207W	-0.353298	YLR020C	-0.518756	YKR013W	0.432329						YGR105W
YBR210W	-0.28846	YGR287C	0.678618	YKR058W	-1.37068						YGR036C
YBR212W	0.159534	YML127W	-0.295133	YDR363W-A	0.735096						YLR124W
YBR213W	0.456231	YAR019C	-0.51635	YDR462W	0.702339						YJR097W
YBR214W	0.13424	YDR435C	-0.443066	YIR037W	0.502283						YLR262C-A
YBR215W	0.235561	YKL220C	1.4442	YDR005C	-0.687115						YDL184C
YBR217W	-0.116496	YLR414C	-0.285451	YGR280C	0.685873						YPR016C
YBR225W	-0.0526382	YML010W	0.400655	YLR072W	-0.788466						YOR309C
YBR228W	-0.415536	YPR196W	0.811784	YNR059W	-1.56186						YDL133C-A
YBR230W-A	0.498882	YJL044C	-0.474589	YOR298C-A	0.496675						YOR041C
YBR233W	-0.234215	YBR241C	-0.429363	YLR355C	0.410544						YLR271W
YBR233W-A	0.81271	YEL036C	-0.400595	YOR175C	-0.570033						YDR506C
YBR235W	-0.844821	YIL015W	-0.324358	YJR127C	-0.82246						YAL004W
YBR237W	-1.18988	YDR182W	-0.313907	YBR282W	0.665903						YOR304C-A
YBR242W	-0.345019	YDR146C	0.341121	YHR028C	-0.519416						YJL214W
YBR244W	-0.532345	YLR454W	-0.524682	YFR049W	0.802957						YDR241W
YBR246W	0.0298001	YGR121C	-0.490219	YGL226C-A	0.808196						YLL038C
YBR250W	-1.58364	YBR235W	-0.455591	YDR483W	-0.441508						YJR108W
YBR251W	-0.0163098	YPR037C	-0.377941	YDL241W	0.936776						YKL084W
YBR252W	0.49594	YKL113C	-0.368178	YIL147C	-0.662815						YDR008C
YBR253W	0.260424	YBR110W	-0.344357	YKL110C	-0.613169						YPR121W
YBR255W	-0.0716028	YGL020C	-0.3224	YLR150W	0.41525						YML007C-A
YBR257W	-0.0632757	YMR109W	-0.31745	YOR205C	-0.801512						YKL214C
YBR259W	-0.553768	YPR173C	0.337722	YDR529C	0.489256						YNL148C
YBR263W	-0.0115122	YNL199C	0.371005	YBR056W-A	1.65169						YPR108W-A
YBR265W	0.131282	YOR329C	0.402385	YER100W	0.592997						YDL160C
YBR267W	0.243716	YBR197C	0.446502	YHR078W	-0.791245
YBR268W	0.192992	YLL039C	0.451655	YLR009W	0.543022
YBR271W	-0.050913	YOR313C	0.854611	YDR131C	-1.03449
YBR274W	-0.0757947	YDR124W	0.907416	YHR117W	-0.526496
YBR278W	-0.492657	YHL023C	-0.412108	YDR510W	0.542235
YBR279W	0.0174862	YAL042W	-0.340745	YER115C	-1.42167
YBR282W	0.998419	YER165W	0.28862	YKR092C	0.53534
YBR284W	-0.563886	YLR192C	0.300166	YAL035W	0.373971
YBR285W	0.0970533	YDR085C	0.487073	YDR381W	-0.414908
YBR286W	0.0841255	YBL060W	-0.525419	YFR040W	-0.620527
YBR287W	-0.234693	YHR091C	-0.4211	YBR082C	0.477883
YBR289W	0.103848	YKL209C	-0.401824	YGR105W	0.770384
YBR290W	0.271204	YNL076W	-0.373549	YML076C	-0.890935
YBR293W	-0.870055	YMR015C	-0.354958	YJR132W	-0.514476
YBR294W	-1.50834	YDR046C	-0.272366	YJL129C	-0.721124
YBR295W	-0.276093	YIL075C	-0.254718	YCR023C	-0.675555
YBR297W	0.112937	YMR242C	0.257687	YBL079W	-0.501923
YBR299W	-0.782167	YER100W	0.320822	YBR101C	0.477322
YCL064C	-0.526047	YNL079C	0.354731	YMR100W	-0.7284
YCL061C	0.0650504	YIR018W	0.728211	YGR074W	0.705051
YCL059C	0.245997	YGR021W	0.49041	YKL063C	0.650645
YCL057C-A	0.391739	YDR434W	-0.287718	YML104C	-0.858632
YCL056C	0.602416	YDR076W	-0.598624	YDR260C	0.865762
YCL052C	0.132085	YBR163W	-0.552297	YEL072W	-1.49157
YCL050C	0.167595	YBR296C	-0.545175	YOL133W	0.721195
YCL049C	-0.269921	YOR274W	-0.510501	YGR268C	0.84312
YCL047C	-0.153069	YOR149C	-0.501339	YGL098W	0.833741
YCL045C	-0.166963	YHR079C	-0.467784	YBR122C	0.670863
YCL044C	-0.243929	YOR269W	-0.455505	YDL123W	0.968703
YCL043C	-0.111905	YJR124C	-0.452598	YPL098C	0.648793
YCL041C	0.277596	YMR218C	-0.433396	YEL048C	0.960031
YCL038C	-0.216258	YDL180W	-0.433249	YCR038C	-1.13123
YCL037C	-0.145711	YML075C	-0.433226	YMR286W	0.827251
YCL035C	0.727447	YDR350C	-0.427551	YAL058W	-0.78272
YCL033C	0.353064	YDR410C	-0.398044	YDR275W	1.09148
YCL031C	-0.0118268	YJR118C	-0.392378	YDR169C	0.685061
YCL030C	-0.0983338	YBR005W	-0.390914	YBR162W-A	0.633617
YCL029C	0.0315176	YHR039C	-0.385828	YOR257W	0.81433
YCL026C-B	0.0035338	YMR264W	-0.36897	YPL173W	0.616771
YCL026C-A	0.275437	YDR057W	-0.367571	YOR028C	0.857981
YCL025C	-0.114845	YBR041W	-0.363364	YLR318W	-1.49474
YCL017C	0.279405	YGL119W	-0.360313	YDL082W	0.392971
YCL016C	-0.84315	YER014W	-0.358633	YHR017W	-0.898943
YCL012C	0.275146	YLR095C	-0.358324	YNL143C	1.32769
YCL011C	-0.345052	YIL039W	-0.357032	YMR066W	-1.06818
YCL010C	-0.45784	YPL259C	-0.355381	YLR293C	0.392713
YCL009C	0.306592	YKL154W	-0.353683	YBL005W	-0.849863
YCL008C	-0.558535	YIL016W	-0.351848	YLL039C	0.478362
YCL002C	-0.625323	YPL208W	-0.343776	YGL080W	0.723882
YCR002C	0.0397789	YEL032W	-0.342419	YJL020C	0.476964
YCR004C	0.348319	YOL115W	-0.341193	YKL056C	0.457212
YCR005C	-0.374579	YHR181W	-0.338248	YIL065C	0.68743
YCR007C	-0.204514	YLR332W	-0.335637	YKL215C	-0.574566
YCR009C	-0.0659197	YBR015C	-0.334166	YGL242C	0.56754
YCR010C	1.89051	YKL140W	-0.334014	YDL073W	-0.749479
YCR011C	-0.300183	YNR021W	-0.329836	YIL092W	-1.1558
YCR014C	1.5615	YGL216W	-0.321856	YDL064W	0.581631
YCR015C	-0.0968949	YGR266W	-0.301597	YNL257C	-0.640076
YCR017C	-0.394851	YCR009C	-0.292816	YLR208W	0.42045
YCR020C	-1.51854	YGL186C	-0.292369	YPL190C	0.430019
YCR020C-A	0.729148	YLR250W	-0.290985	YGL135W	0.433145
YCR021C	0.0230638	YDR033W	-0.285159	YOR383C	-2.86687
YCR022C	-2.6209	YDL212W	-0.282408	YPL244C	-0.77375
YCR023C	-0.513269	YOR085W	-0.278006	YLR454W	-0.536916
YCR024C	-0.0351574	YML012W	-0.264611	YHR193C	0.386978
YCR024C-B	-0.283438	YOR312C	0.242373	YHR045W	-0.615108
YCR024C-A	0.131156	YPR062W	0.262094	YJL183W	-0.529166
YCR025C	-1.90659	YDL092W	0.326194	YNL125C	-0.643234
YCR026C	0.145923	YKL185W	0.333237	YDL232W	1.04443
YCR027C	0.773389	YDR145W	0.341282	YDL092W	0.594093
YCR028C	-0.0781081	YML094W	0.347085	YNL113W	0.565993
YCR028C-A	0.630739	YGL032C	0.353652	YKL024C	-0.502112
YCR030C	-0.113885	YOR208W	0.371673	YLR263W	-2.37806
YCR031C	0.277731	YGL187C	0.386066	YMR033W	-0.552723
YCR035C	0.0918391	YGR183C	0.401964	YPR063C	0.529933
YCR037C	-0.0525004	YOR308C	0.403639	YGR209C	0.562352
YCR038C	-1.46662	YJR092W	0.413775	YDR054C	0.473659
YCR042C	-0.112716	YOL055C	0.414863	YBR010W	0.445003
YCR043C	0.418804	YKR045C	0.421858	YDL204W	1.71537
YCR044C	-0.488125	YBR276C	0.427702	YDR093W	-0.458941
YCR046C	0.346258	YHL010C	0.448456	YIL023C	-0.696621
YCR047C	0.424616	YOR195W	0.45748	YJR003C	-0.648816
YCR054C	-0.180723	YMR316W	0.46122	YGR035C	1.16659
YCR057C	-0.085846	YOL102C	0.479352	YOL062C	-0.578054
YCR059C	0.087927	YJR082C	0.483037	YOR102W	9.99214
YCR064C	1.31009	YGR251W	0.494869	YDR399W	-0.508024
YCR067C	-0.104779	YDR313C	0.49817	YBL099W	0.473055
YCR071C	0.502201	YER139C	0.534649	YBR293W	-1.10292
YCR072C	0.0485433	YLL026W	0.553073	YDR350C	-0.74146
YCR073C	-1.2829	YGR161W-C	0.655567	YDL084W	0.360191
YCR075C	-0.572108	YJR156C	0.669295	YBR197C	0.817489
YCR076C	-0.279349	YMR169C	0.671961	YHL034C	0.412669
YCR077C	0.221927	YLR177W	0.723297	YKL053C-A	0.708789
YCR084C	0.225648	YDL049C	0.728759	YNL049C	-0.555128
YCR087C-A	0.04719	YMR194C-B	0.854361	YKL068W-A	0.742454
YCR090C	-0.245729	YLR054C	0.96995	YOR232W	0.455618
YCR092C	-0.141221	YKL050C	0.983346	YLR029C	0.406857
YCR095C	-0.37954	YKL217W	1.07964	YEL030W	-1.24758
YCR098C	-0.556677	YDL218W	1.24347	YIL047C	-0.5597
YCR102C	-0.829893	YOL015W	1.5436	YGL222C	0.584077
YCL063W	-0.346336	YDR256C	1.54794	YDR387C	-0.976472
YCL058W-A	0.155509	YKL169C	4.15755	YPR132W	0.375326
YCL057W	-0.14025	YIL158W	-0.468676	YFR017C	1.19506
YCL055W	0.055719	YAL022C	-0.28602	YLR426W	-0.929293
YCL054W	0.098391	YER028C	-0.795213	YKL222C	-1.18611
YCL051W	0.119535	YDR316W	-0.385232	YPL068C	-0.975641
YCL048W	-1.12749	YNL219C	-0.385232	YML095C	1.17839
YCL040W	0.0140378	YDL035C	-0.337722	YNL190W	0.468193
YCL039W	-0.58731	YOR112W	-0.320424	YDL239C	-3.77807
YCL036W	-0.336235	YNL016W	0.25852	YNL067W	0.380782
YCL034W	-0.0307044	YKR071C	0.282035	YHR094C	0.550818
YCL032W	-0.128438	YIL044C	0.312197	YNL110C	0.463676
YCL028W	0.504003	YEL037C	0.318256	YIL157C	0.606718
YCL027W	-0.51374	YBL007C	0.332303	YHR005C-A	0.581955
YCL024W	-0.193306	YOL070C	0.333744	YNL082W	-0.665421
YCL021W-A	1.84059	YOL123W	0.339448	YGR212W	-1.378
YCL018W	0.305283	YBR153W	0.414359	YIL039W	-0.462326
YCL014W	-0.338971	YHR138C	0.508386	YMR109W	-0.439271
YCL005W-A	0.546042	YNL133C	0.576277	YKL087C	0.615698
YCL005W	-0.672464	YDR539W	0.271406	YER095W	0.528019
YCL004W	-0.171487	YIL138C	0.319706	YHR132W-A	0.740792
YCL001W	-0.101801	YMR175W	1.78174	YER165W	0.376834
YCR003W	0.196702	YDR191W	-0.437886	YIL069C	0.384818
YCR008W	-0.0942451	YKL044W	-1.17118	YLR048W	0.3304
YCR012W	0.398426	YMR034C	-0.831558	YNL302C	0.33126
YCR016W	0.403688	YNL270C	-0.767765	YKR057W	0.472712
YCR019W	0.207721	YML125C	-0.407694	YEL023C	-2.39389
YCR020W-B	1.57769	YNL236W	-0.382816	YML005W	-0.764721
YCR032W	-0.365401	YOR320C	-0.326626	YAL030W	0.713113
YCR033W	-0.428223	YHR215W	-0.316717	YER164W	-0.448064
YCR034W	0.00702972	YGR281W	-0.294584	YJR104C	0.4146
YCR036W	-0.353136	YHL003C	-0.270974	YDL046W	0.471966
YCR045W-A	-2.84386	YFL048C	-0.255372	YNL175C	0.45937
YCR048W	-0.513522	YML058W	0.250507	YBR235W	-0.685198
YCR051W	0.309093	YNL244C	0.279117	YBR172C	-0.497935
YCR052W	0.407817	YDR192C	0.346563	YOR030W	-0.83972
YCR053W	0.0952548	YGR146C	0.361384	YEL016C	-0.998513
YCR061W	-0.0320002	YGL087C	0.41133	YKL016C	0.476864
YCR063W	0.397921	YBR215W	0.478082	YLR407W	0.680142
YCR065W	-0.19842	YIL055C	0.55502	YGL058W	0.494972
YCR066W	-0.675284	YPL214C	0.408627	YGL073W	-0.596766
YCR068W	-0.142498	YNL283C	-0.344285	YOR168W	0.33735
YCR069W	-0.27348	YLR178C	1.07816	YDL052C	-0.546508
YCR073W-A	0.351515	YGR197C	0.41255	YDR318W	-0.990362
YCR075W-A	0.258754	YBL028C	0.443075	YJL044C	-0.684588
YCR079W	0.0456407	YPL050C	-0.351958	YFL050C	-1.2897
YCR081W	-0.815581	YNL233W	0.314586	YGL037C	0.58372
YCR082W	0.18587	YIL027C	-0.310871	YKL149C	-0.887761
YCR083W	0.0932549	YHL002W	0.330087	YNL003C	-0.759502
YCR086W	-0.0273903	YBR008C	0.673938	YLR047C	-0.926571
YCR088W	0.299963	YDL239C	-1.03757	YPR149W	0.402703
YCR089W	-0.416836	YBR272C	-0.324651	YNL185C	0.630271
YCR091W	-0.0400115	YPL096W	-0.357925	YGR198W	-0.543792
YCR093W	-0.441305	YBL046W	-0.354286	YOR173W	1.1658
YCR094W	0.000212286	YJR131W	-0.349531	YER050C	0.588055
YCR095W-A	-2.83023	YAR071W	-0.317486	YER081W	-0.487571
YCR097W	-0.345128	YGL200C	-0.245863	YLR361C-A	0.930426
YCR105W	-0.162995	YPL052W	0.474678	YLR084C	-0.524871
YCR106W	-0.979033	YNL009W	0.718293	YGR092W	-0.482882
YCR107W	1.84601	YOL053W	-0.408264	YBR269C	0.646041
YDL243C	1.07164	YMR278W	-0.314428	YMR199W	-0.525989
YDL239C	-2.5875	YGL066W	0.387555	YAL031C	-0.757758
YDL238C	0.0829407	YHL024W	0.708686	YKR036C	-0.795363
YDL235C	-0.0924813	YPL103C	-0.407546	YLR441C	0.351543
YDL234C	-0.182225	YBR141W-A	-3.06926	YCL021W-A	2.87082
YDL231C	-1.64674	YOL135C	0.39294	YKL180W	0.357552
YDL227C	-0.159009	YPL267W	0.391446	YPR151C	1.54393
YDL226C	0.292604	YLR459W	-0.370425	YDR429C	0.376259
YDL224C	-0.0295767	YHL038C	-0.358378	YKL082C	0.509425
YDL222C	3.5044	YGL084C	-0.351738	YDL012C	0.600751
YDL220C	-0.292774	YMR221C	-0.331358	YDR141C	-0.446316
YDL217C	0.561224	YCR094W	-0.318497	YKL135C	-0.459043
YDL216C	0.167086	YMR029C	-0.313888	YGL257C	-0.726764
YDL215C	0.101916	YER157W	-0.296306	YPR028W	0.383039
YDL214C	1.43316	YMR199W	-0.289681	YJL191W	0.389001
YDL213C	0.170508	YPL256C	-0.287839	YGR065C	-0.651043
YDL211C	-0.693975	YGL244W	0.292331	YOL036W	-0.630022
YDL209C	0.374214	YJL184W	0.345955	YPL222W	-0.934827
YDL205C	-0.110084	YDR263C	0.633987	YLR381W	-0.898107
YDL203C	-0.24134	YDL210W	0.817152	YDL157C	0.60824
YDL200C	-0.111827	YGL193C	3.34715	YER120W	0.431303
YDL199C	-0.0545597	YLR320W	-0.55035	YGL027C	-0.431525
YDL198C	0.0647657	YGR263C	-0.466577	YDR252W	1.06831
YDL197C	-2.4642	YBR042C	-0.439369	YEL013W	0.412589
YDL190C	0.0701201	YCL030C	-0.355273	YDR265W	-0.858629
YDL188C	0.331208	YLR309C	-0.310565	YPR010C-A	0.533779
YDL187C	-5.15001	YLR450W	-0.302682	YHR042W	-0.399187
YDL184C	2.42211	YCR084C	0.219594	YGR165W	0.575553
YDL183C	-0.227928	YLR220W	0.287389	YHR089C	0.4795
YDL177C	-0.357076	YPR042C	0.299368	YER173W	-0.864334
YDL175C	0.2408	YHR146W	0.301983	YJL052W	-0.32098
YDL174C	-0.0836	YNL155W	0.452899	YOR149C	-0.825263
YDL171C	-0.250894	YBR072W	0.511155	YKR014C	0.495399
YDL169C	0.498442	YKL008C	-0.292755	YMR259C	-0.545313
YDL167C	-0.313044	YLR047C	-0.466544	YOR041C	3.83505
YDL166C	0.394225	YLR214W	-0.449373	YMR273C	-0.740087
YDL164C	-0.165338	YEL043W	-0.422579	YOR154W	-0.840651
YDL160C-A	0.898644	YHR142W	-0.334263	YDL083C	0.339088
YDL160C	0.495445	YFL041W	-0.311817	YJL144W	1.31346
YDL157C	0.450071	YBR094W	-0.296452	YBR270C	-1.34053
YDL153C	0.390604	YPL085W	0.268997	YOR291W	-0.561619
YDL148C	0.32664	YHR102W	0.289053	YGL105W	0.35639
YDL145C	0.0340239	YNL050C	0.33517	YGL243W	-0.823976
YDL144C	0.180341	YGR156W	0.34589	YKR035W-A	0.497038
YDL142C	-0.150668	YGR043C	0.779431	YLR275W	0.805308
YDL140C	-0.29697	YHR071W	0.422531	YIR002C	-0.69314
YDL139C	0.141278	YLR087C	-0.424443	YBR076C-A	2.19581
YDL135C	0.477437	YOR254C	-0.314486	YML019W	-0.589873
YDL134C	0.414002	YOR099W	-0.257872	YGR199W	-0.52847
YDL133C-A	2.0972	YBR049C	0.417684	YPL214C	-0.683169
YDL126C	0.374042	YMR170C	0.46327	YKL164C	0.354278
YDL125C	-0.522327	YER091C	-0.34117	YKR071C	0.391248
YDL121C	0.0525777	YER069W	-0.262847	YER046W	1.2231
YDL119C	0.080727	YFR033C	0.241193	YHR152W	0.616263
YDL115C	-0.0317103	YKR006C	0.363418	YLR075W	0.362913
YDL113C	-0.35443	YDL115C	0.366485	YER184C	-1.01683
YDL111C	0.267254	YBL035C	0.27612	YLR373C	-0.5551
YDL110C	0.460202	YOL016C	-0.294645	YPR146C	-3.99174
YDL109C	-1.13368	YJL146W	0.402445	YHR176W	-1.29033
YDL106C	0.179267	YNL043C	-1.27649	YCR027C	0.758339
YDL104C	-0.0698673	YDR164C	-0.333379	YOR195W	0.600253
YDL103C	0.129435	YGL151W	-0.325962	YPR016C	0.362472
YDL101C	-0.136765	YJR040W	-0.311629	YML010W	0.377055
YDL100C	0.0490937	YJL101C	-0.30802	YAL003W	0.327428
YDL098C	0.154384	YMR302C	-0.304065	YDR241W	2.9143
YDL097C	0.318954	YFL036W	-0.239512	YGL134W	-0.978446
YDL094C	-3.86772	YOR168W	0.248852	YDR079W	0.886838
YDL091C	-0.167424	YMR240C	0.377866	YOR137C	-1.36524
YDL090C	-0.146408	YOR100C	1.43932	YPL034W	-1.21485
YDL088C	-0.441631	YDR506C	-0.479804	YCL016C	-0.719056
YDL087C	0.184319	YNL313C	-0.441724	YDL159W	-0.703506
YDL086C-A	1.69812	YOL092W	-0.382221	YJR025C	0.499845
YDL085C-A	1.46096	YBR207W	-0.376772	YER158C	-1.13013
YDL083C	0.320234	YLR057W	-0.375852	YER125W	0.370577
YDL081C	0.532475	YIL046W	-0.37087	YDR164C	-0.578218
YDL080C	-0.456069	YJR013W	-0.37018	YDR517W	-0.575156
YDL079C	1.2009	YMR313C	-0.346243	YNL007C	0.445592
YDL078C	0.186439	YLR372W	-0.344244	YML020W	-0.842721
YDL077C	-0.380795	YFR041C	-0.332158	YDL075W	0.357232
YDL076C	-0.26714	YPR114W	-0.329786	YNL301C	0.304212
YDL074C	0.19609	YBR218C	-0.324009	YDL043C	0.724019
YDL072C	-0.219871	YJL183W	-0.319782	YDR224C	0.352035
YDL069C	-0.414424	YER070W	-0.316282	YLL063C	-1.05028
YDL067C	1.30067	YNR013C	-0.314587	YNL271C	-0.476639
YDL065C	0.508543	YBR260C	-0.314031	YER170W	0.764881
YDL063C	-0.207089	YMR214W	-0.307387	YMR211W	-0.715572
YDL061C	1.23033	YFR040W	-0.298415	YNL182C	-0.479786
YDL059C	-0.0609081	YIL088C	-0.280863	YNL137C	0.462526
YDL055C	0.245537	YML097C	-0.280071	YLR457C	-1.09433
YDL054C	-0.349243	YDR304C	-0.266409	YPL232W	0.39714
YDL053C	0.139852	YBR283C	-0.261037	YDR132C	-0.854164
YDL052C	-0.544223	YNL289W	-0.250313	YLR406C	0.376536
YDL049C	0.0324673	YGL167C	-0.248561	YPL220W	0.371131
YDL048C	-0.0984876	YGL055W	-0.207159	YJL126W	-0.840002
YDL045C	-0.192138	YER131W	0.203856	YHR057C	-0.53448
YDL044C	-0.178464	YMR091C	0.279295	YDR026C	-0.667062
YDL043C	0.667254	YMR192W	0.289261	YNL162W-A	1.46105
YDL042C	-0.210395	YML017W	0.309667	YCL009C	0.37905
YDL040C	-0.142454	YPR129W	0.325848	YKL045W	-0.52926
YDL039C	3.40823	YDR363W-A	0.337363	YDR454C	0.372123
YDL036C	0.179401	YKL002W	0.337444	YKL216W	0.367966
YDL035C	-0.281587	YPL181W	0.373181	YEL031W	-0.372698
YDL033C	-0.677066	YLR206W	0.385241	YOR304C-A	0.899592
YDL028C	0.0281799	YKL041W	0.395496	YOR315W	-0.515525
YDL027C	-0.133057	YOL008W	0.43872	YKR061W	-0.90085
YDL025C	-0.0769473	YKR085C	0.440092	YER113C	-0.548093
YDL024C	0.794649	YER109C	0.534232	YOR327C	0.495724
YDL020C	0.0860571	YOR180C	0.758463	YGL108C	0.853599
YDL019C	0.201537	YKL065W-A	1.82524	YOL107W	-0.719138
YDL018C	-0.169061	YDL086C-A	1.96417	YOL086C	0.3649
YDL015C	-0.177573	YGL063C-A	3.43995	YPL150W	-0.604869
YDL012C	0.461664	YGR092W	-0.247273	YKL079W	-0.591626
YDL009C	7.9318	YJR060W	0.337364	YPL014W	0.927491
YDL005C	-0.0718371	YIL078W	0.211144	YMR091C	0.421494
YDL002C	0.578526	YOL105C	0.424699	YHR079C	-0.727261
YDR001C	0.00597638	YDL231C	-0.527082	YDR382W	0.397877
YDR005C	-0.767572	YBL018C	-0.40247	YHL026C	-1.25501
YDR006C	-0.780242	YLR138W	-0.358653	YCL057C-A	0.487341
YDR008C	3.092	YHR005C	-0.244958	YPR144C	-0.418694
YDR016C	0.109216	YGL232W	0.291407	YDR308C	0.640208
YDR017C	-0.287325	YFR042W	-0.382751	YOR252W	0.592193
YDR018C	-0.216419	YDL003W	-0.255179	YGL106W	0.39277
YDR019C	0.0630535	YDR276C	0.301765	YIL123W	0.322095
YDR020C	0.529145	YBR284W	0.731828	YPL127C	0.440239
YDR022C	0.274215	YHR143W	-0.266509	YPR068C	-1.13441
YDR026C	-0.702064	YOR151C	-0.34691	YLR057W	-0.532373
YDR027C	-0.167272	YML116W	-0.499874	YJR122W	-0.746744
YDR028C	0.321945	YDR105C	-0.337957	YDR073W	-0.749832
YDR030C	-0.112283	YIL150C	0.437484	YML108W	0.928584
YDR032C	0.271477	YPR200C	0.889832	YCR020C	-1.54878
YDR034C	-0.832289	YHR161C	0.405723	YPR193C	1.74155
YDR036C	-0.330384	YNL012W	0.753044	YBR071W	0.542066
YDR038C	0.000327033	YOR304C-A	-0.527179	YPL230W	1.17573
YDR042C	0.311005	YPR139C	-0.324904	YER104W	0.861179
YDR045C	0.400657	YJL201W	-0.293975	YLR200W	0.558751
YDR046C	-0.00993898	YPL274W	-0.254172	YOR312C	0.300638
YDR048C	-0.760644	YDR170C	0.214096	YER025W	0.302707
YDR050C	0.298715	YAL033W	0.315621	YIL146C	0.985015
YDR051C	0.0494237	YGR009C	0.331736	YNL233W	0.512679
YDR052C	-0.00217012	YOR378W	-0.745536	YNR024W	0.722499
YDR054C	0.586483	YKL150W	-0.405263	YDL125C	-0.375413
YDR056C	-0.0361268	YNL272C	-0.295012	YPR198W	-0.575004
YDR058C	0.0712905	YLR234W	-0.543751	YCR045W-A	-4.39546
YDR059C	0.66939	YFR005C	0.347252	YKL172W	0.408068
YDR066C	0.141114	YNR036C	0.41801	YDR378C	0.544468
YDR067C	0.0569851	YJR061W	-0.681555	YGL087C	0.552819
YDR069C	-0.0448527	YBR085C-A	0.479733	YAL053W	-0.390889
YDR070C	1.45344	YDR366C	-1.05061	YCR012W	0.373096
YDR071C	0.0218042	YBR085W	-0.554128	YMR295C	0.390552
YDR072C	-0.375636	YOL013W-A	-0.413358	YCR014C	1.63248
YDR078C	-0.284774	YHR017W	-0.37403	YOR337W	-0.58429
YDR079C-A	0.306181	YCR048W	-0.333941	YLR113W	0.398839
YDR081C	-0.278048	YDR300C	-0.333414	YOR231W	-0.610897
YDR084C	0.0612064	YGR031W	-0.324775	YIL163C	2.85744
YDR085C	0.366261	YIR022W	-0.303183	YJR034W	0.756105
YDR086C	1.44106	YJL197W	-0.290055	YER180C-A	1.1685
YDR087C	0.226974	YDR481C	-0.268731	YJL080C	0.286649
YDR088C	0.504438	YJL174W	-0.228998	YDR034W-B	1.55203
YDR090C	0.0172144	YBR011C	0.215576	YML081C-A	0.548314
YDR091C	0.078058	YDL084W	0.236591	YLR025W	0.49822
YDR097C	0.08201	YMR083W	0.239389	YNL147W	0.532145
YDR098C	0.0274255	YER081W	0.241495	YOL117W	-0.829441
YDR101C	-0.205872	YKL024C	0.248751	YBL007C	0.350133
YDR104C	-0.17597	YPR187W	0.250381	YOL005C	0.48015
YDR105C	-0.299549	YGR250C	0.259065	YOR151C	-0.47265
YDR107C	-0.297096	YMR161W	0.28003	YPL221W	-0.414999
YDR109C	-0.477966	YLR442C	0.285699	YDR146C	0.444907
YDR111C	-0.0426285	YAL049C	0.306312	YDR388W	0.372225
YDR113C	0.184204	YPL170W	0.332425	YDL093W	-0.576871
YDR116C	0.33811	YIL065C	0.341079	YHR116W	0.84639
YDR117C	-0.13966	YPL180W	0.352809	YPR073C	0.586058
YDR120C	-0.0694753	YMR268C	0.356513	YDR138W	-0.609585
YDR123C	0.192094	YER050C	0.383595	YHR145C	-1.37641
YDR125C	0.410332	YKL138C	0.38802	YKL122C	0.481666
YDR129C	0.365323	YLR337C	0.39688	YAR023C	-2.00611
YDR130C	0.0201555	YDL133W	0.398605	YHR122W	0.515177
YDR131C	-0.865058	YMR042W	0.468487	YAL054C	1.36488
YDR132C	-0.899729	YPL024W	0.481219	YAL016W	0.335181
YDR133C	-6.21886	YDL109C	0.662318	YDR082W	-1.16278
YDR135C	-0.483386	YMR306W	0.804277	YKR004C	-1.12284
YDR139C	0.51815	YER054C	0.984702	YPR183W	0.371106
YDR141C	-0.486773	YMR155W	-0.352854	YOR380W	-1.00118
YDR142C	-0.165958	YKR091W	0.440314	YLR177W	0.733886
YDR143C	0.0755874	YNR059W	0.63122	YKR044W	-0.748203
YDR144C	-0.411359	YOL043C	0.545323	YPL018W	0.636371
YDR146C	0.373907	YMR244C-A	0.440572	YCL005W	-0.702393
YDR148C	0.466713	YJL088W	-0.313081	YKL002W	0.542122
YDR151C	0.0106444	YOR077W	0.574467	YDR062W	0.346583
YDR153C	0.0866698	YLR068W	0.401009	YDR476C	0.53695
YDR162C	0.598854	YHR148W	0.34774	YBR298C	-2.00586
YDR164C	-0.566469	YHR077C	-0.302947	YCL014W	-0.404862
YDR166C	-0.151811	YKL064W	0.276565	YNL069C	0.31239
YDR169C	0.579836	YER029C	0.301957	YPL037C	0.35897
YDR170C	0.0730934	YGR167W	0.355969	YGR158C	0.521487
YDR173C	0.44622	YDR063W	0.405484	YGR234W	0.339263
YDR175C	0.275556	YHR210C	0.982263	YMR188C	0.501104
YDR179C	-0.130892	YOR102W	2.87784	YER009W	0.336362
YDR181C	-0.115332	YDR180W	-0.348246	YKL137W	0.666286
YDR185C	0.0651162	YDR081C	-0.31699	YCR011C	-0.345407
YDR186C	-0.338026	YBL037W	-0.25102	YPL143W	0.316952
YDR190C	0.195196	YPL163C	-0.239592	YDR012W	0.359871
YDR192C	0.273939	YOR106W	0.339981	YJL168C	-0.515158
YDR194C	0.185527	YBR216C	0.368151	YIL062C	0.355831
YDR196C	0.159981	YMR208W	-0.249406	YER139C	0.826832
YDR198C	-0.566661	YGL174W	0.438776	YNL208W	0.409753
YDR200C	-0.454296	YJL172W	-0.218535	YGL154C	-1.26338
YDR202C	-0.170793	YGL142C	-0.362603	YDR450W	0.31001
YDR207C	-0.611002	YCR073C	-0.434795	YNL291C	-0.633933
YDR217C	-0.172149	YLL021W	0.266593	YKL155C	-0.564178
YDR218C	0.171768	YGL185C	0.381252	YJL091C	-0.51558
YDR219C	-0.074457	YBR141C	0.476785	YGL062W	-0.428942
YDR224C	0.189869	YOR224C	0.231546	YDR468C	0.617926
YDR228C	-0.324614	YNL031C	0.210775	YMR284W	-0.812705
YDR231C	-0.257696	YMR129W	-0.339852	YOL147C	0.502915
YDR233C	-0.188083	YOR376W-A	-1.261	YJL207C	-0.468307
YDR236C	-0.447885	YOL126C	-0.306773	YJR047C	0.828065
YDR238C	0.227312	YER044C	-0.289474	YER129W	-0.650194
YDR239C	-0.0324602	YNL040W	0.255604	YBR158W	-0.388822
YDR240C	-0.196625	YJL024C	0.309347	YMR311C	0.512367
YDR243C	0.239416	YPR115W	0.313421	YNL047C	-0.601249
YDR248C	0.0721256	YKL021C	-0.304493	YOR164C	0.389127
YDR249C	-0.917819	YKR022C	0.455764	YKL163W	0.39117
YDR253C	-0.379276	YHR097C	0.523509	YOR035C	-0.511875
YDR255C	0.359695	YDR391C	0.352413	YIL049W	-1.08303
YDR256C	0.757286	YHR140W	-0.95056	YPR115W	-0.540417
YDR257C	-0.177884	YMR182C	-0.721799	YJR033C	-0.609486
YDR258C	0.383247	YLL003W	-0.434984	YCL010C	-0.552443
YDR259C	0.0734972	YCR023C	-0.318315	YEL043W	-0.499939
YDR260C	0.884984	YLR324W	-0.299913	YJL073W	-0.592276
YDR261C	-0.380438	YPR132W	0.192513	YJR101W	0.46778
YDR263C	0.899901	YAL035W	0.227133	YAL056W	-0.564203
YDR264C	-0.00230714	YNL102W	0.241453	YKL213C	-0.402166
YDR266C	0.285765	YBR289W	0.253898	YML049C	-0.4443
YDR267C	-0.0742085	YDR226W	0.272336	YER069W	-0.371398
YDR276C	1.30492	YGR095C	0.288309	YHR082C	-0.443007
YDR277C	0.147071	YCR082W	0.340993	YPL208W	-0.520326
YDR281C	0.369624	YHR001W-A	0.415617	YCR004C	0.322694
YDR282C	-2.97849e-05	YJL103C	0.524113	YJR014W	0.372476
YDR283C	-0.016011	YPL056C	1.15238	YGR264C	-0.325662
YDR284C	0.172336	YHR049C-A	-1.71522	YOL111C	0.47397
YDR286C	0.290698	YJR110W	-0.382807	YJL001W	0.370585
YDR289C	0.219724	YDL061C	0.216838	YLR333C	0.398791
YDR292C	0.0769272	YGL206C	0.223413	YML026C	0.334306
YDR293C	0.124121	YIL050W	0.348466	YOR020C	0.328107
YDR294C	-0.36543	YJR052W	0.371812	YOR332W	0.361681
YDR295C	-0.305154	YDL064W	0.252879	YFL039C	0.276262
YDR298C	0.720568	YPL020C	0.340731	YBR055C	-0.506602
YDR300C	0.0156323	YCL061C	0.343851	YDL066W	-0.328881
YDR303C	-0.123556	YLR239C	0.393675	YBL072C	0.320785
YDR304C	-0.241513	YKL075C	-0.343325	YGR167W	0.394564
YDR305C	-0.102196	YDR302W	-0.313035	YDR412W	0.489319
YDR306C	0.277213	YML038C	-0.289239	YER093C	-0.612202
YDR308C	0.845649	YJL173C	0.287216	YJR092W	0.387694
YDR309C	0.11809	YIR003W	0.453542	YDL097C	0.322178
YDR310C	-0.00325869	YCR030C	-0.265594	YOR249C	-0.757261
YDR313C	0.265144	YKR036C	-0.415743	YGR266W	-0.457302
YDR314C	0.0448559	YLR426W	-0.37554	YBR091C	0.587603
YDR315C	-0.151589	YDR503C	-0.36356	YMR142C	0.324857
YDR319C	-0.480299	YNL277W	-0.363192	YMR063W	-1.03906
YDR320C	-0.108623	YDR296W	-0.277508	YOR369C	0.316472
YDR320C-A	-0.454009	YKR016W	-0.268246	YGR148C	0.30359
YDR322C-A	0.880225	YDR497C	-0.248213	YBL063W	-0.766541
YDR323C	-0.0869291	YAL053W	-0.240698	YJL162C	-0.734779
YDR324C	0.0951346	YDL143W	-0.233683	YPL204W	-0.367993
YDR326C	0.0188872	YLR150W	0.226477	YDL055C	0.283156
YDR328C	0.792067	YMR183C	0.245341	YDR349C	-0.434526
YDR329C	-0.14731	YKR080W	0.279428	YBR049C	0.386202
YDR333C	0.117787	YDR196C	0.389703	YPR024W	0.325195
YDR338C	-0.321373	YFR046C	0.565181	YBR103W	-0.559625
YDR339C	0.0506419	YOR028C	0.636737	YDL045W-A	0.582794
YDR341C	0.0541091	YBR270C	0.701237	YDR418W	0.289212
YDR342C	0.0553372	YPL054W	0.821653	YBR098W	-0.820235
YDR343C	0.0364787	YNR058W	0.842629	YML129C	0.499621
YDR345C	0.707213	YLR023C	0.280564	YKL040C	0.388522
YDR346C	0.127646	YDR363W	0.391334	YOL082W	0.596002
YDR348C	-0.0391795	YHR156C	0.48813	YPL175W	-0.587657
YDR349C	-0.500416	YDL110C	0.567293	YBR171W	0.462604
YDR350C	-0.923543	YER145C	-0.436463	YIL029C	-2.3537
YDR357C	0.393033	YEL016C	-0.434177	YJL106W	1.57756
YDR359C	-0.353716	YPL162C	-0.403464	YKL184W	0.328041
YDR361C	0.109719	YLR452C	-0.398328	YMR013W-A	-4.14467
YDR362C	0.00291432	YHR202W	-0.38802	YLR088W	-0.448212
YDR364C	-0.391627	YBR014C	-0.358969	YDL120W	0.466607
YDR365C	0.328863	YML059C	-0.345161	YBR294W	-1.71465
YDR366C	-0.469035	YNL273W	-0.325639	YGL048C	0.328812
YDR369C	0.0938345	YNR051C	-0.325336	YMR064W	-0.625921
YDR370C	-0.251359	YBR092C	-0.322783	YPL149W	-0.87671
YDR372C	0.352816	YPR179C	-0.321841	YCR036W	-0.400685
YDR375C	-0.289063	YGL025C	-0.308786	YDL195W	-0.322752
YDR378C	0.685746	YJL134W	-0.284548	YLR115W	-0.503308
YDR379C-A	-0.446337	YGL160W	-0.281882	YHR155W	-0.596596
YDR381C-A	0.58756	YDL140C	-0.273403	YJL148W	0.389004
YDR383C	-0.643653	YDR411C	-0.266089	YOR276W	0.338841
YDR384C	0.155754	YOR209C	-0.234655	YCL028W	0.357572
YDR387C	-0.539683	YKL039W	-0.226433	YER074W	0.302313
YDR390C	-0.184061	YPR113W	-0.224416	YMR219W	0.430278
YDR391C	-0.250822	YJL117W	-0.208132	YPR173C	0.41088
YDR397C	0.285108	YBR068C	-0.199856	YER175C	0.578631
YDR402C	-0.403828	YNR016C	0.18713	YFR001W	0.44501
YDR404C	-0.0182497	YNL111C	0.229547	YBL089W	-0.672832
YDR407C	-0.423164	YDR210W	0.245498	YKR020W	0.952261
YDR408C	0.0752219	YOR191W	0.252912	YBR031W	0.345306
YDR410C	-0.370119	YKL218C	0.266313	YIL028W	-4.37246
YDR411C	-0.1378	YDR266C	0.269755	YML107C	-0.838083
YDR414C	0.144477	YJR048W	0.275242	YGL114W	-0.475219
YDR415C	-0.433219	YGL178W	0.28305	YOR188W	-0.480016
YDR422C	0.163826	YLR455W	0.289233	YNL179C	-1.72119
YDR423C	0.0599337	YDL012C	0.291418	YMR243C	-0.384546
YDR424C	0.45482	YDR162C	0.307956	YOR037W	-0.633109
YDR428C	0.262685	YOR231W	0.307996	YML106W	0.329892
YDR429C	0.469007	YER034W	0.319113	YMR226C	0.296798
YDR430C	0.194996	YHR152W	0.337352	YEL050C	0.427997
YDR435C	-0.589561	YLR170C	0.338083	YDR013W	-0.680052
YDR441C	0.928306	YGR029W	0.338352	YOR148C	-0.928356
YDR443C	-0.249122	YLR298C	0.34469	YOR223W	0.667959
YDR445C	1.18752	YKL176C	0.357126	YKR085C	0.670399
YDR447C	0.0909562	YBL103C	0.363792	YLR185W	0.358053
YDR449C	0.132581	YMR112C	0.384572	YNL008C	-0.611424
YDR451C	0.0058222	YIL045W	0.501148	YNL288W	0.451867
YDR453C	0.770442	YIL162W	0.54023	YML124C	-0.322459
YDR454C	0.397757	YLR283W	0.556353	YBR015C	-0.348658
YDR458C	0.0692892	YDL024C	0.874561	YJL151C	0.386734
YDR459C	-1.02784	YOR086C	-0.23655	YLL045C	0.287194
YDR461C-A	0.206264	YDR317W	-0.819296	YDL077C	-0.514543
YDR465C	0.256943	YOR207C	-0.395685	YLR288C	-0.799775
YDR468C	0.688104	YBR112C	0.218751	YDR356W	0.483363
YDR470C	0.305221	YDR002W	0.230313	YDL140C	-0.320999
YDR473C	0.194139	YOL109W	0.242894	YBL102W	0.453413
YDR475C	-0.25086	YNR054C	0.297154	YPL096C-A	1.09589
YDR476C	0.355599	YIL161W	0.4479	YLR273C	-1.04972
YDR479C	-0.436789	YIR019C	0.910684	YBL052C	-0.752788
YDR481C	-0.169204	YKL027W	-0.352544	YGL228W	-0.347757
YDR482C	0.748857	YEL039C	-0.502288	YIL078W	0.278823
YDR485C	-0.0486148	YOR034C	-0.335484	YGR184C	-0.370225
YDR486C	0.399675	YOL058W	-0.255224	YOR265W	0.531208
YDR487C	0.069209	YHL034C	0.293736	YGL122C	0.354776
YDR488C	0.652221	YJR067C	0.371204	YHR059W	0.544099
YDR490C	-0.114914	YGR230W	0.613338	YGL203C	-0.443161
YDR495C	0.0560598	YHR041C	-0.310725	YPL269W	-0.963297
YDR496C	0.0112909	YGR040W	0.286684	YLR131C	-0.464985
YDR497C	-0.32973	YLR404W	-0.413737	YPR194C	-0.920033
YDR498C	0.133149	YDL179W	-0.27357	YMR262W	-0.701649
YDR500C	0.0672532	YKL012W	0.299096	YDR031W	0.743197
YDR502C	0.266781	YJL029C	-0.251845	YMR278W	-0.451188
YDR503C	-0.360779	YGR138C	-0.40727	YCR016W	0.44109
YDR504C	0.917038	YNL238W	-0.318272	YKL014C	-0.37047
YDR505C	0.225231	YMR301C	-0.320116	YJR046W	-0.466895
YDR506C	0.714002	YDR235W	-0.315094	YDL134C	0.395942
YDR507C	-0.00414253	YLR066W	-0.246318	YDR192C	0.528077
YDR508C	0.0861076	YML079W	0.281521	YML125C	-0.456721
YDR512C	0.307552	YBR155W	0.299023	YKR046C	0.37695
YDR514C	-0.116026	YPR012W	-3.02896	YDR099W	0.277836
YDR516C	0.0749083	YAR023C	-0.851086	YOR022C	-0.714457
YDR520C	-0.327971	YDR403W	-0.785314	YML018C	-0.496909
YDR523C	-0.114456	YOL152W	-0.378908	YOL014W	-2.0125
YDR524C	0.013425	YCR081W	-0.352747	YKL057C	-0.394354
YDR524C-B	1.67119	YLR443W	-0.344509	YLR068W	0.629249
YDR524C-A	-0.924374	YHR007C	-0.328105	YLR257W	0.35347
YDR529C	0.561577	YJL093C	-0.325653	YJR126C	-0.464069
YDR530C	-0.979169	YER093C	-0.311306	YNL273W	-0.497414
YDR532C	-0.419088	YKL065C	-0.292298	YJL136C	0.307577
YDR533C	-0.040413	YMR071C	-0.27928	YMR235C	0.303221
YDR534C	-0.698923	YDR056C	-0.264181	YBR078W	0.271912
YDR535C	-0.0725202	YLL031C	-0.256064	YIL071C	-0.879375
YDR540C	0.633657	YGL194C	-0.246251	YLR399C	-0.372415
YDR541C	-0.619894	YBR205W	-0.235671	YPL007C	-0.587163
YDL248W	0.189535	YLR438W	-0.231846	YNL260C	0.558381
YDL244W	-0.311893	YBR158W	-0.231147	YPR005C	0.737275
YDL242W	2.0729	YMR241W	-0.216195	YGR032W	0.444161
YDL241W	0.964039	YLR447C	-0.215516	YER146W	0.512368
YDL240W	-0.0215368	YOL040C	0.18975	YJL201W	-0.526048
YDL237W	-0.67155	YKL156W	0.191713	YOR309C	0.527973
YDL236W	0.162125	YGR285C	0.203556	YLR001C	-0.598185
YDL233W	-0.223178	YBL061C	0.209194	YAL044C	0.469688
YDL232W	0.461502	YPL110C	0.211881	YBR243C	-0.460655
YDL230W	-0.419855	YOR122C	0.215256	YBR016W	0.465416
YDL229W	-0.00533977	YPL137C	0.225508	YMR244C-A	0.709346
YDL225W	-0.022879	YKL020C	0.245173	YLR383W	-0.535963
YDL221W	-2.46227	YMR047C	0.249094	YLL060C	0.791647
YDL219W	0.36303	YDL120W	0.264183	YLL041C	0.476076
YDL218W	0.417745	YBL085W	0.274439	YCR020C-A	0.616597
YDL212W	-0.132776	YKL116C	0.29186	YGL008C	0.26435
YDL210W	-0.462652	YMR022W	0.292291	YBL048W	-6.8769
YDL208W	0.132633	YGR178C	0.295781	YEL036C	-0.389381
YDL207W	-0.378786	YPL018W	0.297266	YHR081W	-0.564672
YDL206W	-0.428411	YGR041W	0.299339	YMR083W	0.318647
YDL204W	1.73115	YKL088W	0.30255	YMR014W	0.444248
YDL202W	0.00771103	YHR086W	0.305261	YGR177C	-0.443411
YDL201W	0.0413016	YML007W	0.314822	YGR233C	-0.421865
YDL195W	-0.209572	YDL150W	0.325742	YJL187C	-0.571405
YDL194W	-0.101325	YIL007C	0.370976	YIR042C	-0.903439
YDL193W	-0.123084	YBR108W	0.371135	YOR046C	0.327051
YDL192W	0.153228	YML099C	0.371556	YGR201C	0.968611
YDL191W	0.058471	YNL138W-A	0.416932	YOR290C	-0.360045
YDL189W	-0.449292	YDR007W	0.696743	YBR218C	-0.285408
YDL185W	0.218286	YML100W	0.858856	YNL048W	-0.495984
YDL182W	0.161676	YGL165C	2.80427	YPL183W-A	0.510035
YDL181W	1.12172	YGL247W	-0.472757	YDL110C	0.477288
YDL180W	-0.782346	YMR243C	-0.307342	YLR020C	-0.55375
YDL179W	-0.164254	YPL227C	-0.26487	YDR452W	-0.393257
YDL178W	-0.0803782	YOR046C	0.217937	YKL191W	-0.411062
YDL176W	-0.310979	YJL076W	0.251608	YGL247W	-0.819849
YDL173W	0.234597	YAL016W	0.260006	YLR223C	0.418687
YDL170W	-0.307873	YOR355W	0.27578	YMR108W	0.263848
YDL168W	0.317559	YFR014C	0.416639	YML093W	0.356274
YDL165W	0.223109	YPL166W	0.436786	YOR299W	-0.506261
YDL161W	0.42845	YOR349W	-0.381628	YFL057C	-1.84771
YDL159W	-0.198183	YOR071C	-0.339455	YNL308C	0.3468
YDL156W	0.18649	YJL133W	-0.325396	YAL001C	-0.491001
YDL155W	0.113394	YER154W	-0.235881	YHR077C	-0.387996
YDL154W	-0.319837	YNL229C	0.22253	YPL064C	-0.586236
YDL150W	0.44511	YNL005C	0.271971	YJL025W	-0.878568
YDL149W	0.196476	YDL048C	0.486758	YFR042W	-0.67746
YDL147W	0.250153	YEL073C	0.882958	YER076C	-0.849768
YDL146W	-0.172122	YDR382W	0.173512	YPR191W	0.319674
YDL143W	-0.10806	YKR062W	0.300919	YNL005C	0.414061
YDL141W	-0.0929285	YML109W	0.33368	YOR305W	-0.680733
YDL138W	-0.721899	YPL133C	0.427406	YER060W-A	-0.466974
YDL137W	0.043857	YPL205C	1.59136	YDR499W	-0.669974
YDL136W	0.0442106	YNL326C	-0.393798	YMR193W	0.485348
YDL133W	0.0562745	YGR220C	-0.251855	YPL225W	0.342636
YDL132W	-0.00483507	YHR118C	0.289792	YEL009C-A	-6.05031
YDL131W	0.208619	YPL092W	-0.339324	YDR309C	0.342815
YDL130W-A	1.28045	YIL067C	-0.291057	YOR113W	0.51677
YDL130W	0.184461	YLR439W	0.246204	YPL117C	0.302993
YDL129W	0.639314	YIL151C	0.276629	YDR144C	-0.369278
YDL128W	-0.100041	YMR005W	0.291594	YPR107C	0.605996
YDL127W	0.212284	YNL329C	0.304636	YEL073C	1.16413
YDL124W	0.182968	YFL027C	0.309422	YBR084C-A	0.284904
YDL123W	0.950697	YNL215W	0.32249	YDR108W	-0.600142
YDL122W	-0.00444598	YDR288W	0.340628	YKR043C	0.291255
YDL120W	0.654201	YJR050W	0.35177	YGL123W	0.269665
YDL117W	0.0355224	YNL063W	0.39229	YDR006C	-0.402849
YDL116W	-0.250397	YBL078C	0.460148	YMR062C	0.395393
YDL112W	-0.0255243	YCR091W	0.547133	YOR321W	-0.443382
YDL108W	-0.247581	YML050W	-0.452138	YLR170C	0.523712
YDL107W	-0.382459	YHR193C	0.209045	YGL044C	0.469599
YDL105W	-0.0127915	YLR321C	0.227088	YNL116W	0.450082
YDL102W	0.195321	YOR279C	0.38186	YFR032C-A	0.333853
YDL099W	0.152899	YJL144W	0.568815	YPR163C	0.293216
YDL095W	-0.220953	YJR153W	0.88947	YJL051W	-0.514222
YDL093W	-0.335035	YJR031C	-0.31669	YER057C	0.329719
YDL092W	0.448619	YBR233W-A	0.449901	YHR146W	0.333177
YDL089W	0.0778803	YGL227W	-0.286557	YJL184W	0.51771
YDL086W	0.0861348	YNL302C	0.181631	YLL003W	-0.726884
YDL085W	0.494382	YOL111C	0.29362	YDR059C	0.651324
YDL084W	0.411359	YGL222C	0.316505	YKL165C	-0.392431
YDL082W	0.236121	YCL051W	0.340706	YGR154C	-1.1126
YDL075W	0.437411	YER175C	0.347416	YER004W	0.385619
YDL073W	-0.651629	YER035W	0.385677	YOL143C	0.419283
YDL070W	0.241942	YLR213C	0.495489	YDR145W	0.357811
YDL066W	-0.312071	YNL048W	-0.294003	YKL007W	0.342278
YDL064W	0.57719	YGL163C	0.278939	YER071C	0.661576
YDL060W	-0.17815	YOR339C	-1.55386	YIL044C	0.485171
YDL058W	-0.190677	YJL038C	-1.26509	YMR090W	0.671431
YDL057W	-0.248285	YJL047C-A	-0.975882	YGR040W	0.515712
YDL056W	-0.354025	YBL019W	-0.442942	YBR041W	-0.397972
YDL051W	-0.308717	YDL211C	-0.432897	YAL051W	-0.511767
YDL046W	0.403198	YHR002W	-0.406804	YDR291W	-0.582011
YDL045W-A	0.386466	YDR150W	-0.380112	YGL036W	-0.552951
YDL031W	0.10833	YEL025C	-0.370096	YDR352W	0.477348
YDL030W	0.101663	YHR011W	-0.369698	YPR187W	0.361524
YDL029W	0.0457925	YBL042C	-0.359555	YPL008W	-0.669968
YDL022W	0.350347	YOL025W	-0.357407	YDR148C	0.348019
YDL021W	0.159459	YMR013C	-0.353569	YIL010W	0.43293
YDL017W	-0.434813	YPR084W	-0.353299	YNL042W	-0.976731
YDL014W	1.03082	YOR342C	-0.34681	YNR022C	0.502328
YDL013W	-0.0381793	YDR132C	-0.341799	YER002W	0.412005
YDL010W	0.210805	YKL125W	-0.340842	YOL113W	0.603631
YDL008W	0.38433	YKL189W	-0.336628	YAL047C	-0.646272
YDL007W	0.0205561	YLL048C	-0.334356	YML002W	-1.33743
YDL006W	0.534071	YNR066C	-0.333562	YIL099W	-1.85527
YDL004W	0.574185	YAR028W	-0.328703	YHR051W	0.343719
YDL003W	-0.255563	YHR144C	-0.326146	YPR179C	-0.541766
YDL001W	0.105468	YJR006W	-0.321876	YNL086W	1.01349
YDR002W	0.537405	YLR353W	-0.317558	YDL065C	0.419388
YDR003W-A	-4.20388	YHR149C	-0.315632	YOR227W	-0.42271
YDR004W	-0.651118	YGL061C	-0.300602	YBR223C	-0.749577
YDR007W	0.605441	YAL031C	-0.29518	YPL050C	-0.327821
YDR009W	0.407634	YHR167W	-0.288124	YFR028C	-0.402995
YDR011W	-0.102318	YLR247C	-0.286276	YGR161C	0.381209
YDR012W	0.316072	YGL210W	-0.266071	YAL059W	0.466322
YDR013W	-0.528211	YPL265W	-0.258196	YBR262C	0.474923
YDR014W	-0.362911	YDR284C	-0.255804	YCL008C	-0.494397
YDR014W-A	0.924367	YAL023C	-0.254724	YPL144W	-0.659908
YDR021W	-0.352617	YJL097W	-0.253269	YPL159C	0.623707
YDR023W	0.129286	YAR027W	-0.252882	YBR233W-A	0.848265
YDR024W	2.08704	YDR093W	-0.252259	YCL036W	-0.428876
YDR025W	0.213687	YDR331W	-0.245175	YDR405W	0.452204
YDR031W	0.790387	YBR096W	-0.24513	YNL236W	-0.430324
YDR033W	0.140561	YOR356W	-0.244934	YOL148C	-0.477252
YDR034W-B	1.96745	YBR199W	-0.241808	YKR065C	0.363929
YDR035W	0.416319	YGR026W	-0.23533	YOR191W	-0.392032
YDR037W	0.132389	YGR147C	-0.232295	YDL243C	0.933267
YDR041W	-0.106991	YKL215C	-0.228818	YDL217C	0.442892
YDR044W	0.259977	YDR452W	-0.216649	YCR107W	1.42267
YDR047W	-0.121141	YHR047C	-0.211621	YPL186C	1.3603
YDR049W	-0.0328483	YJL186W	-0.210598	YBR259W	-0.714737
YDR055W	-0.0262925	YKR018C	-0.208851	YNL106C	-0.514953
YDR057W	-0.265016	YHR063C	-0.191925	YBL058W	0.31244
YDR060W	0.0603411	YHR030C	-0.185794	YKL138C	0.561433
YDR061W	-0.0738541	YJR139C	-0.185103	YCR063W	0.591586
YDR062W	0.359057	YEL054C	0.178917	YEL046C	0.260782
YDR063W	0.191971	YIL148W	0.179836	YCR095C	-0.516735
YDR064W	0.0714469	YGL135W	0.184714	YER058W	0.913421
YDR065W	-0.308315	YBR245C	0.184928	YJL110C	-1.44264
YDR068W	0.0840943	YPL037C	0.190235	YGL244W	0.321412
YDR073W	-0.793508	YOR164C	0.192935	YEL040W	-0.302018
YDR074W	0.0318159	YMR260C	0.195556	YOR039W	0.358748
YDR075W	0.144316	YNL255C	0.198105	YJR036C	-1.28743
YDR076W	0.242698	YCR077C	0.198242	YPL046C	0.855552
YDR077W	0.645443	YKL040C	0.199879	YLR078C	-0.426699
YDR079W	0.842106	YOR182C	0.207554	YBR094W	-0.486449
YDR080W	0.0437821	YGR148C	0.212215	YCR090C	-0.427666
YDR082W	-0.782178	YPR065W	0.214031	YNR018W	0.336042
YDR083W	0.500352	YBL032W	0.214424	YOR027W	0.281173
YDR089W	-0.157646	YGR173W	0.216773	YBR042C	-0.52952
YDR092W	0.490363	YML111W	0.219177	YOR376W-A	-5.16986
YDR093W	-0.332034	YNL161W	0.222197	YNL076W	-0.499194
YDR096W	-0.107221	YOR354C	0.222286	YAL017W	-0.418498
YDR099W	0.255746	YBR101C	0.227928	YOR067C	-0.452059
YDR100W	0.0695257	YOL004W	0.231932	YBL001C	0.405297
YDR103W	-0.240154	YML091C	0.233978	YGL076C	0.260396
YDR106W	-0.413619	YLR292C	0.238231	YNL124W	-0.450808
YDR108W	-0.491952	YLR199C	0.238642	YDR371W	-0.549911
YDR110W	-0.120271	YDL213C	0.243236	YBR155W	0.398608
YDR115W	0.255943	YDR328C	0.243963	YLR167W	0.30887
YDR118W	-0.385347	YDR001C	0.251632	YNL306W	0.409093
YDR119W	-0.0356222	YPL129W	0.252921	YBR039W	0.306853
YDR119W-A	1.63203	YPL040C	0.255425	YDL167C	-0.395083
YDR121W	0.316485	YDR412W	0.256751	YER094C	0.295184
YDR122W	0.118042	YDR005C	0.257113	YJL072C	0.489418
YDR124W	-1.02148	YER159C	0.264939	YLR207W	-0.433165
YDR126W	-0.617713	YGL122C	0.273599	YJR010C-A	0.58578
YDR127W	0.013075	YBR212W	0.27553	YLL013C	0.399007
YDR128W	-0.374205	YNL208W	0.277838	YNR066C	-0.702908
YDR137W	-0.349697	YFL021W	0.278585	YPL255W	-0.715184
YDR138W	-0.260773	YMR067C	0.280779	YDR372C	0.317639
YDR140W	-0.00194495	YDR122W	0.28467	YDR139C	0.576537
YDR145W	0.416453	YJR035W	0.288945	YKL185W	0.325512
YDR147W	-1.13995	YNL015W	0.295792	YDR294C	-0.369611
YDR150W	-0.597455	YBR123C	0.301934	YLR035C	-0.824669
YDR152W	0.198007	YML051W	0.309185	YOL003C	-0.56959
YDR158W	0.126542	YCL057C-A	0.310362	YDR162C	0.485559
YDR159W	-0.062249	YGL041W-A	0.311583	YDR513W	0.373285
YDR160W	-1.48837	YFL023W	0.317413	YLR321C	0.392629
YDR161W	0.398986	YOR158W	0.31973	YOL043C	-0.767346
YDR163W	0.519683	YBL058W	0.326189	YOR184W	0.292962
YDR165W	-0.31739	YGR239C	0.32731	YJL058C	-0.746732
YDR167W	0.266576	YBR119W	0.330291	YKR021W	-0.488401
YDR168W	0.209781	YMR311C	0.330515	YPR133C	0.3373
YDR171W	0.262714	YBR077C	0.335449	YKR094C	0.267249
YDR172W	0.208425	YDR469W	0.342298	YHL040C	-1.45696
YDR174W	-0.794424	YDR306C	0.343731	YER102W	0.267382
YDR176W	-0.441332	YDR014W	0.353586	YJL100W	-0.629959
YDR177W	-0.00795689	YOR223W	0.355523	YOR262W	-0.504408
YDR178W	0.71786	YCR088W	0.360725	YOR063W	0.276518
YDR179W-A	-0.215807	YDR511W	0.368758	YKL049C	0.561915
YDR180W	-0.265407	YDL176W	0.371026	YOR313C	-1.42437
YDR182W	-0.271989	YIL134W	0.388336	YGR117C	-0.539915
YDR183W	-0.0456599	YLR258W	0.393324	YKL058W	0.455963
YDR188W	0.0157437	YDR478W	0.396676	YOR094W	0.529965
YDR189W	-0.257241	YMR269W	0.425291	YBR089C-A	0.375836
YDR191W	-0.523111	YIL107C	0.426647	YHR121W	0.416077
YDR195W	-0.0215473	YDR374W-A	0.426756	YLR188W	-0.421451
YDR197W	0.558486	YDR222W	0.42684	YHR097C	0.475926
YDR201W	0.236225	YBR132C	0.432942	YOR260W	-0.307295
YDR204W	-0.0759408	YBL059W	0.443115	YDL080C	-0.570126
YDR205W	-0.265381	YJR008W	0.453288	YDR488C	0.676826
YDR206W	-0.313129	YOR295W	0.458941	YJL003W	0.675917
YDR208W	0.133498	YPL077C	0.46387	YLR095C	-0.492192
YDR210W	1.12725	YMR196W	0.537913	YJR050W	0.603403
YDR211W	-0.159414	YHR105W	0.54792	YBR022W	0.584492
YDR212W	0.110083	YML054C	0.552239	YJL122W	0.415505
YDR213W	0.331733	YCR007C	0.601167	YOL103W	-0.45655
YDR214W	0.223541	YGR256W	0.61045	YPL257W	1.01772
YDR216W	1.6102	YML042W	0.636257	YIL018W	0.293847
YDR221W	0.213948	YLR165C	0.657017	YMR164C	-0.596711
YDR222W	0.115698	YLR394W	0.811179	YGR178C	0.281235
YDR223W	-2.39965	YOL154W	0.850585	YCR017C	-0.375263
YDR225W	0.604195	YIL136W	0.888923	YBR156C	-0.588388
YDR226W	0.473141	YPL192C	1.53277	YNL222W	0.461266
YDR227W	-0.356667	YPL119C-A	2.39107	YNR039C	-0.514965
YDR229W	0.158287	YDR448W	0.248647	YJR135W-A	0.486116
YDR232W	-1.5925e-06	YHR151C	-0.359919	YDR242W	-0.790633
YDR234W	-0.122856	YPR122W	-0.317894	YER033C	-0.613922
YDR235W	-0.530645	YGL223C	-0.245368	YKL034W	-0.477317
YDR237W	0.132167	YNL113W	0.223675	YGR263C	-0.73703
YDR241W	2.66313	YIL120W	-0.617177	YER116C	0.649625
YDR242W	-0.832232	YML034W	0.278528	YHR123W	-0.434332
YDR244W	0.392074	YDR244W	0.314116	YOL004W	-0.286696
YDR245W	0.146151	YDR009W	0.531244	YMR019W	-0.537308
YDR246W	-0.0548522	YGR198W	-0.307565	YJL071W	-0.564297
YDR247W	-0.114036	YHR048W	-0.666407	YCL039W	-0.432505
YDR251W	-0.264065	YDR082W	-0.599204	YKL061W	0.719573
YDR252W	1.0043	YPR134W	-0.412771	YOR218C	8.44184
YDR254W	0.07928	YMR013W-A	-0.40157	YOR159C	0.637764
YDR262W	0.164809	YOL065C	-0.278164	YBL027W	0.2717
YDR265W	-0.89611	YAL051W	-0.250251	YHR091C	-0.527776
YDR268W	-0.321319	YMR119W	-0.242521	YIR004W	0.348999
YDR270W	-0.195684	YGR060W	-0.231205	YCR075C	-0.580997
YDR272W	0.197876	YHR123W	-0.226714	YER001W	-0.298993
YDR273W	-1.44363	YER168C	-0.223788	YJR013W	-0.541024
YDR275W	1.09273	YGR125W	-0.220675	YEL037C	0.312936
YDR279W	-0.0851262	YGR260W	-0.202775	YLL024C	0.249556
YDR280W	0.0759823	YNL145W	-0.188485	YBR036C	-0.332279
YDR285W	-0.599223	YGL173C	0.166068	YKL176C	-0.509778
YDR287W	-0.012563	YIL038C	0.196629	YMR296C	-0.295325
YDR288W	-0.00480598	YOR276W	0.209097	YGL142C	-0.449828
YDR291W	-0.531266	YOR123C	0.221346	YGL068W	0.364309
YDR296W	-0.0567215	YNL147W	0.222705	YLR229C	0.333547
YDR297W	-0.254096	YDR308C	0.24942	YJR106W	-0.568654
YDR299W	0.423898	YMR256C	0.276604	YGR211W	0.287964
YDR301W	-0.436292	YNR049C	0.305899	YEL004W	-0.813553
YDR302W	-0.00224995	YMR197C	0.318426	YJL104W	0.380049
YDR307W	-0.513179	YJL057C	0.380055	YMR234W	-0.657926
YDR311W	0.031483	YOR381W	0.746038	YLL028W	0.365216
YDR312W	0.0385866	YNR014W	0.78316	YOR286W	0.367763
YDR316W	-0.0508675	YAL061W	1.217	YFR031C-A	0.293324
YDR317W	-0.295827	YLR392C	-0.310821	YER167W	0.425674
YDR318W	-0.69828	YOR041C	-0.281954	YDL161W	0.364532
YDR321W	0.174111	YGL208W	0.429273	YLR092W	-0.679168
YDR322W	0.32066	YER134C	-0.249208	YOR125C	0.535372
YDR325W	-0.180432	YCR090C	-0.242465	YOL075C	-0.52926
YDR330W	0.261986	YMR188C	0.3218	YGL145W	-0.440059
YDR331W	-0.326735	YHL035C	-0.540895	YIR009W	0.659675
YDR332W	-1.87171	YER076C	-0.43679	YDR165W	-0.307363
YDR334W	0.0625645	YNL249C	-0.436153	YNL094W	-0.518534
YDR335W	-0.294013	YNL008C	-0.303243	YML007C-A	2.51624
YDR336W	-1.68197	YER057C	0.203823	YJL101C	-0.433369
YDR337W	0.179454	YDR129C	0.225662	YJR117W	-0.324658
YDR347W	0.00344763	YOR294W	0.292211	YMR197C	0.380081
YDR351W	-0.475566	YHR209W	0.332428	YBL047C	0.274724
YDR352W	0.399699	YDL139C	0.454309	YEL055C	-0.288566
YDR353W	0.102228	YOR121C	1.34592	YPR074C	-0.24098
YDR354W	-0.219343	YJR143C	-0.224025	YDR198C	-0.552044
YDR356W	0.582677	YGL072C	-0.948102	YPL059W	0.372474
YDR358W	0.0273914	YPR075C	-0.233079	YFL001W	-0.544013
YDR363W	0.315492	YJL154C	-0.219171	YJL068C	0.386206
YDR363W-A	0.653419	YDR420W	0.262233	YDR335W	-0.316606
YDR367W	-0.225754	YLR393W	0.403784	YDR028C	0.328964
YDR368W	0.123767	YJL095W	0.247014	YDR235W	-0.51635
YDR371W	-0.478969	YDR205W	-0.300096	YMR195W	0.514263
YDR374W-A	0.575408	YOR104W	-0.26621	YLL012W	-0.633414
YDR376W	-0.281065	YDL161W	0.24343	YDR463W	0.353827
YDR377W	0.653493	YOR297C	0.288399	YKL167C	0.553661
YDR379W	-0.395474	YMR280C	0.516745	YPL239W	0.359145
YDR380W	-0.0686059	YDR518W	-0.243652	YEL034W	0.272602
YDR381W	-0.531532	YFR051C	-0.222336	YBL104C	-0.457297
YDR382W	0.426785	YJL065C	0.260535	YDR258C	0.388885
YDR385W	-0.0854968	YDR495C	0.287935	YER029C	0.478495
YDR386W	-0.12382	YOR264W	0.299922	YOR224C	0.320861
YDR388W	0.431306	YIL063C	0.305411	YMR301C	-0.382169
YDR389W	-0.25449	YOL001W	0.37741	YML117W	-0.322045
YDR392W	-0.356328	YDR255C	0.314792	YDR434W	-0.341505
YDR393W	-0.0820725	YDR393W	-0.342342	YPR143W	0.464225
YDR394W	0.0372085	YBR093C	-0.256734	YBL076C	-0.267346
YDR395W	-0.108061	YFL010C	0.251115	YGR285C	0.237856
YDR398W	0.165213	YGL092W	0.256341	YER140W	-0.600496
YDR399W	-0.491185	YER048C	0.258718	YMR127C	-0.725515
YDR401W	1.34304	YPL146C	0.272282	YKR053C	1.90509
YDR403W	-0.828917	YKL204W	0.316793	YKL168C	-0.670504
YDR405W	0.265405	YHR145C	-0.454984	YBR153W	0.562958
YDR406W	-0.0818584	YLR142W	-0.215155	YDL109C	-0.94688
YDR409W	-0.413977	YPL235W	-0.176195	YJR044C	0.452708
YDR412W	0.630568	YBR088C	-0.171392	YER075C	-0.492685
YDR416W	-0.0446219	YKL122C	0.250446	YNL286W	-0.618094
YDR418W	0.266773	YKL099C	0.275127	YDL188C	0.334729
YDR419W	-0.177058	YJR127C	0.288521	YMR124W	-0.391178
YDR420W	-0.337288	YPR199C	0.308899	YOL101C	-0.930638
YDR421W	-1.21379	YNL314W	0.404017	YDR475C	-0.532814
YDR425W	-0.0990249	YPL089C	0.246564	YBL103C	0.465578
YDR427W	0.114151	YNR065C	-0.255769	YJL090C	-0.66402
YDR434W	-0.255573	YIL043C	-0.187613	YBR077C	0.475992
YDR436W	0.224102	YEL001C	-0.185229	YBR188C	0.577089
YDR438W	-0.97102	YBL068W	0.213246	YLR179C	0.330201
YDR439W	-0.560203	YOR162C	0.323006	YBR160W	0.3324
YDR440W	0.0127033	YGR008C	0.422308	YMR277W	-0.359493
YDR444W	-0.624828	YGR249W	1.33776	YMR105C	0.91353
YDR448W	0.0170469	YLR284C	0.4988	YLR459W	-0.48903
YDR450W	0.223897	YLR228C	0.292303	YKL099C	0.413974
YDR452W	-0.194651	YDR130C	0.387892	YCR051W	0.345084
YDR456W	-0.30379	YPR067W	0.331792	YOR064C	-0.826183
YDR457W	0.122704	YNL230C	0.406225	YNL152W	-0.515506
YDR460W	0.66705	YCR034W	-0.239586	YDL060W	-0.31253
YDR461W	-1.51975	YBR029C	-0.235446	YGR005C	0.355265
YDR462W	0.585027	YLR026C	0.242253	YML103C	-0.308292
YDR463W	0.225729	YOR247W	-0.215297	YDR236C	-0.522455
YDR464W	0.121776	YIL117C	-0.200112	YGR238C	-0.627118
YDR466W	-0.677597	YKL205W	-0.304516	YML081W	-0.415239
YDR469W	0.300841	YBL011W	-0.196415	YJL059W	-0.582806
YDR471W	0.25593	YOR291W	-0.24705	YDL160C-A	0.608235
YDR472W	-0.196274	YDR524C-B	0.182038	YJR098C	-0.693037
YDR477W	0.199748	YJR144W	0.222377	YKR078W	-0.628375
YDR478W	0.12608	YLR183C	0.237113	YPL252C	0.44811
YDR483W	-0.549868	YPR119W	0.238911	YNL139C	-0.32021
YDR484W	-0.176299	YJL159W	0.245982	YGR193C	0.311028
YDR489W	0.262685	YNL166C	0.257805	YML006C	-0.54471
YDR492W	-0.493952	YBR188C	0.389418	YIL056W	-0.448239
YDR493W	0.638113	YLR211C	0.481637	YHR103W	0.339491
YDR494W	0.401038	YMR105C	0.947604	YLR242C	-0.864264
YDR499W	-0.658463	YPR192W	1.02276	YER027C	0.364544
YDR501W	0.0117286	YBR023C	-0.235576	YJL011C	0.509139
YDR510W	0.671598	YNL168C	-0.192132	YOL034W	-0.607713
YDR511W	0.635681	YML085C	-0.183504	YDL008W	0.520139
YDR513W	0.32409	YPL059W	0.251748	YBR252W	0.410586
YDR515W	0.0313156	YOR060C	0.398715	YLR133W	0.426891
YDR517W	-0.446068	YGR221C	0.446328	YOR136W	0.257317
YDR518W	-0.297454	YAL037W	0.904486	YDR493W	0.515853
YDR519W	0.397092	YNL179C	-0.665608	YDR121W	0.494399
YDR525W-A	0.505743	YFL047W	-0.223575	YER117W	0.299916
YDR527W	-0.399671	YGL048C	0.23617	YOR111W	0.508133
YDR528W	-0.3192	YDL133C-A	-0.239119	YMR298W	0.362987
YDR531W	0.0985618	YKL120W	-0.226918	YOL136C	0.415786
YDR536W	0.268147	YPL195W	-0.226542	YLR237W	0.426358
YDR538W	-0.348692	YOL083W	0.640719	YDR137W	-0.457924
YDR539W	0.041171	YML089C	-1.30139	YER019C-A	0.369953
YEL073C	1.07831	YEL023C	-0.702844	YER005W	-0.490518
YEL068C	-0.264241	YEL072W	-0.645743	YMR038C	0.310531
YEL064C	-0.00289324	YJL205C	-0.53747	YBL068W	0.348284
YEL063C	-0.698835	YDL059C	-0.402235	YLR375W	-0.480309
YEL061C	-0.214944	YML018C	-0.38556	YEL032W	-0.322588
YEL060C	0.348531	YMR185W	-0.372097	YNL029C	-0.714956
YEL059C-A	0.0178626	YHL036W	-0.369035	YLR435W	0.424985
YEL057C	-0.882009	YNL250W	-0.365747	YOR208W	-0.502493
YEL055C	-0.215576	YGR023W	-0.361619	YER064C	0.302272
YEL054C	0.549433	YPL207W	-0.35689	YGL209W	0.462204
YEL053C	-0.391035	YPL107W	-0.340934	YDR050C	0.277666
YEL050C	0.51572	YKR007W	-0.330032	YGR203W	0.546683
YEL048C	0.915064	YJL206C	-0.327584	YDR456W	-0.364229
YEL047C	0.08902	YER147C	-0.317065	YML123C	-0.232614
YEL046C	0.226342	YKL098W	-0.315311	YPL114W	2.33428
YEL039C	0.0439471	YBR104W	-0.310872	YKL019W	-0.394429
YEL037C	0.334328	YKL124W	-0.309183	YLR165C	-0.986445
YEL036C	-0.37441	YLR375W	-0.293822	YOL008W	0.527779
YEL029C	-0.0805981	YBR172C	-0.280408	YLR220W	0.378224
YEL025C	-0.983145	YGL143C	-0.276512	YLL058W	-0.522375
YEL023C	-1.59404	YER052C	-0.2711	YGL179C	-0.812621
YEL017C-A	2.29287	YLR188W	-0.269105	YBR035C	0.310435
YEL016C	-0.794827	YPR055W	-0.268477	YDR228C	-0.411682
YEL009C-A	-2.98988	YIR002C	-0.262926	YOL015W	-2.83024
YEL009C	-0.424588	YDR329C	-0.262122	YER092W	0.46406
YEL008C-A	2.00274	YGL153W	-0.261884	YGR090W	-0.291776
YEL005C	-0.667047	YEL040W	-0.25669	YML027W	0.472096
YEL002C	-0.09481	YCL032W	-0.251835	YDL002C	0.452424
YEL001C	0.197046	YJL054W	-0.249663	YOR158W	0.387714
YER003C	0.0583854	YDR061W	-0.24857	YOR112W	-0.368878
YER007C-A	0.258492	YGR170W	-0.246947	YNL136W	-0.615708
YER008C	-0.213751	YOR016C	-0.237408	YJL093C	-0.495847
YER010C	-0.0230397	YHR187W	-0.236241	YBR254C	0.505492
YER017C	5.86573e-05	YOL148C	-0.234182	YDL150W	0.418687
YER018C	-0.194962	YFR039C	-0.226744	YAL041W	-0.393921
YER019C-A	0.375211	YIL035C	-0.225991	YOR020W-A	0.578173
YER026C	0.13032	YDR519W	-0.214653	YAL020C	-0.563394
YER027C	0.405233	YPR125W	-0.21211	YDR017C	-0.343758
YER028C	-2.55591	YHR018C	-0.211295	YLR356W	0.514394
YER029C	0.362422	YDR367W	-0.21078	YNR058W	-1.17479
YER031C	0.235439	YDR245W	-0.202216	YGR027C	0.301831
YER033C	-0.606074	YMR033W	-0.198331	YOL080C	0.482784
YER036C	-0.114148	YGL012W	-0.19203	YOR217W	0.308113
YER038C	0.00764639	YBR166C	-0.18981	YOR121C	6.0107
YER039C	-3.9423	YKL073W	-0.182595	YGL180W	0.539945
YER043C	0.154318	YPL234C	-0.16756	YJR152W	-1.01582
YER044C	-0.292732	YEL058W	-0.162115	YOR267C	0.413324
YER044C-A	-0.814353	YBR078W	-0.15021	YDR025W	0.251039
YER045C	0.0956229	YKR043C	0.163559	YMR225C	0.495433
YER047C	0.161581	YCR052W	0.175817	YPL198W	0.230459
YER048C	0.326725	YBL072C	0.178343	YBR132C	0.463966
YER050C	0.547915	YDR309C	0.180161	YPR041W	0.24341
YER052C	-0.0345657	YAL003W	0.186688	YKL098W	-0.568172
YER053C	0.561674	YLR398C	0.1962	YNL241C	-0.258791
YER053C-A	1.18089	YPR004C	0.207107	YOL006C	-0.341031
YER054C	0.582985	YPR072W	0.207522	YPL072W	-0.661426
YER055C	0.220918	YER013W	0.210906	YKL004W	0.394385
YER056C	-0.229262	YMR102C	0.215712	YLR051C	0.368585
YER056C-A	0.171615	YIL131C	0.215838	YDR065W	-0.741875
YER057C	0.271582	YGL106W	0.216786	YFR031C	-0.501706
YER061C	-0.506601	YDR408C	0.216819	YIL135C	-0.375084
YER062C	0.430519	YER042W	0.218323	YDR207C	-0.50665
YER064C	-0.0116638	YGR014W	0.221878	YBR242W	-0.416801
YER065C	-0.441664	YPR103W	0.22803	YIR006C	0.256739
YER071C	0.692406	YCL028W	0.230141	YNL248C	0.301323
YER075C	-0.623702	YOR239W	0.230941	YGL237C	0.541599
YER076C	-0.814906	YMR009W	0.233857	YKL006W	0.240719
YER077C	-0.00450558	YJR025C	0.235718	YNL219C	-0.339031
YER078C	-0.11758	YGR003W	0.238541	YNL084C	0.328863
YER082C	-0.106546	YHR039C-A	0.241112	YOL154W	-1.60162
YER083C	-0.0606459	YBR252W	0.243618	YOR011W	-0.647944
YER087C-B	0.758549	YKL192C	0.244064	YER172C	0.314141
YER088C	-0.706828	YDR213W	0.249091	YIL074C	-0.283567
YER088C-A	-0.820497	YBR151W	0.25188	YFL014W	0.764668
YER089C	0.156107	YCL010C	0.267285	YDR092W	0.402222
YER091C	-0.141969	YLR038C	0.272329	YPL120W	0.496602
YER093C	-0.596259	YPR188C	0.273761	YCR044C	-0.389889
YER093C-A	0.214277	YBR231C	0.279409	YNL099C	0.418353
YER094C	0.267912	YLR107W	0.282468	YOR127W	-0.374479
YER099C	0.0917048	YBR022W	0.288305	YPL024W	0.569756
YER101C	-0.16345	YER010C	0.303564	YLL014W	0.449553
YER105C	-0.111264	YOR238W	0.309597	YGR009C	0.320403
YER107C	0.0087905	YGL035C	0.312214	YMR229C	0.221554
YER109C	-0.136072	YPL241C	0.314354	YER062C	0.330125
YER110C	-0.522887	YPR009W	0.316779	YLR073C	-0.503504
YER111C	-0.309419	YGR196C	0.320964	YFL038C	0.254224
YER113C	-0.514248	YFR016C	0.346576	YNR063W	0.824766
YER114C	-0.0335533	YBR167C	0.350459	YJR141W	-0.754773
YER115C	-0.798985	YDR330W	0.369835	YKL144C	-0.521962
YER116C	0.61823	YOR287C	0.372583	YIL052C	0.293476
YER118C	0.25671	YKR019C	0.384438	YIR032C	-0.645405
YER119C	0.147413	YER116C	0.38519	YPL095C	-0.754025
YER122C	0.089694	YGL162W	0.392677	YDL079C	1.36379
YER124C	0.176028	YNL213C	0.432643	YML028W	0.264189
YER126C	0.280802	YER065C	0.440344	YOL049W	0.312333
YER130C	-0.123715	YPL095C	0.450429	YPR159W	0.255276
YER132C	-0.754275	YDR540C	0.460668	YBR096W	-0.341153
YER134C	0.352435	YIL163C	0.939506	YBR114W	-0.523251
YER137C	0.985052	YER188W	1.01948	YHR132C	-0.28718
YER139C	0.806867	YOR186W	1.25062	YPR103W	0.276909
YER142C	-0.216027	YMR206W	1.407	YNR031C	-0.354754
YER144C	-0.146822	YPL135C-A	-1.37862	YCR032W	-0.446745
YER145C	-0.366071	YKL165C-A	-1.11177	YCR057C	-0.26795
YER147C	-0.432995	YMR266W	-0.411383	YBR110W	-0.397814
YER149C	-0.0161137	YDL017W	-0.279703	YBL039W-B	1.33639
YER151C	-0.185602	YBL076C	-0.263677	YDR129C	0.252061
YER152C	-0.0361873	YIL014W	-0.242046	YNL101W	-0.336305
YER155C	0.0312552	YLR312W-A	-0.225696	YML042W	-0.9024
YER156C	0.106752	YDL178W	-0.189804	YPR121W	4.24976
YER158C	-1.36156	YHR098C	-0.18864	YHR110W	-0.437489
YER159C	0.244477	YBR106W	-0.177684	YHR201C	-0.319903
YER161C	1.02592	YER080W	-0.169128	YER060W	-0.621548
YER162C	0.127866	YMR121C	0.170234	YLR104W	-0.478601
YER163C	-0.0973949	YOR096W	0.173484	YGR036C	0.531275
YER168C	-0.314249	YBR102C	0.210142	YIL156W-B	0.465714
YER172C	0.443716	YDL188C	0.213301	YGL251C	-0.712338
YER174C	-0.0118901	YLR237W	0.242458	YML001W	0.28878
YER175C	0.529615	YDL065C	0.25171	YDR033W	0.234526
YER180C	-2.61872	YNR022C	0.252171	YOR261C	0.27668
YER180C-A	1.10543	YIL156W-B	0.277946	YCR071C	0.404325
YER183C	-0.0434854	YGR268C	0.339643	YNR033W	-0.329433
YER184C	-1.40101	YBL091C-A	0.392366	YDL189W	-0.399211
YER186C	0.804667	YER092W	0.249551	YLR277C	-0.397888
YER188C-A	-4.08142	YMR307W	-0.164949	YGR029W	0.387597
YEL072W	-0.83753	YPR133C	0.226024	YIL137C	-0.282272
YEL071W	-0.163642	YMR006C	-0.227319	YGR240C	0.216111
YEL070W	0.532604	YIL068C	-0.209063	YDR003W-A	-4.61617
YEL066W	-0.0266566	YDR258C	0.361012	YMR281W	-0.614548
YEL065W	-0.356487	YNL059C	-0.202375	YHR016C	0.395816
YEL062W	-0.506234	YPL220W	0.166001	YGR227W	-0.410484
YEL058W	-0.174041	YLR256W	0.252381	YNL080C	-0.52665
YEL056W	-0.119773	YNL185C	0.289534	YDR459C	-0.660376
YEL052W	-0.417481	YJL129C	-0.221907	YML099C	-0.450638
YEL051W	0.354576	YMR209C	-0.31013	YNL280C	-0.306756
YEL049W	-1.13027	YML023C	-0.398455	YGR044C	0.375533
YEL044W	-0.310717	YEL053C	-0.307447	YCR077C	0.260978
YEL043W	-0.475469	YGL159W	-0.275682	YJR055W	0.716622
YEL042W	-0.106458	YGL114W	-0.246976	YDR261C	-0.346182
YEL041W	-0.791507	YGR141W	-0.234615	YIL038C	0.283148
YEL040W	-0.289755	YOR281C	0.190383	YGL148W	0.271627
YEL038W	0.0061799	YGR038W	0.21263	YDL138W	-0.689352
YEL034W	0.253129	YPL002C	0.307938	YLR397C	-0.321353
YEL033W	0.641897	YOL014W	0.598095	YDR161W	0.298287
YEL032W	-0.126625	YLR207W	-0.212487	YDR486C	0.40526
YEL031W	-0.252616	YPR155C	-0.270167	YOL116W	-0.537453
YEL030W	-1.11035	YNL045W	-0.196054	YDR223W	-2.06865
YEL028W	0.530096	YMR065W	-0.740876	YGR098C	-0.461742
YEL027W	0.728052	YJR106W	-0.342777	YNL092W	-1.05478
YEL026W	0.651477	YPL151C	-0.271912	YOR080W	-0.529809
YEL024W	0.613378	YHR078W	-0.2675	YER049W	-0.248402
YEL022W	0.0316507	YHR186C	-0.251094	YML034W	0.324777
YEL021W	0.144301	YGL086W	-0.234147	YOL092W	-0.352462
YEL020W-A	0.26725	YFR024C-A	-0.212089	YMR029C	-0.39799
YEL018W	-0.342469	YDR188W	-0.18632	YOL119C	-0.320878
YEL017W	-0.113586	YIL041W	-0.178982	YOR071C	-0.613417
YEL015W	0.181172	YJR014W	0.170948	YJL132W	-0.61558
YEL013W	0.353782	YER120W	0.1853	YML113W	0.408168
YEL012W	0.461014	YGR158C	0.217348	YNL187W	-1.03001
YEL011W	0.197365	YMR002W	0.250463	YFR003C	0.42346
YEL008W	3.8734	YDR533C	0.275793	YMR268C	0.527783
YEL007W	-0.113536	YOR346W	0.283983	YFR041C	-0.377912
YEL006W	-0.206434	YGR222W	0.319214	YJL216C	2.30358
YEL004W	-0.594207	YKL038W	0.324368	YDR277C	0.431195
YEL003W	0.3016	YGL121C	0.427808	YJL029C	-0.393742
YER001W	-0.261881	YHR022C	0.784264	YMR042W	0.753444
YER002W	0.500737	YKL135C	-0.177123	YGR021W	0.480317
YER004W	0.307409	YLR167W	0.158971	YIL031W	-0.495545
YER005W	-0.559291	YKL130C	-0.218194	YPR102C	0.223074
YER006W	0.183377	YHR132W-A	0.312889	YJR040W	-0.363724
YER007W	-0.526132	YLR396C	-0.266851	YDR115W	0.47636
YER009W	0.333754	YPR153W	-0.621362	YNL054W	-0.393354
YER011W	-0.015559	YJR009C	-0.209761	YDL116W	-0.328623
YER012W	0.413917	YKL077W	-0.188203	YNL115C	-0.389775
YER013W	0.209051	YGR117C	-0.280655	YOR281C	0.325606
YER014W	-0.238939	YKR072C	0.214309	YNL155W	0.404823
YER015W	-0.860663	YHR157W	1.12215	YIL114C	-0.603292
YER016W	0.0387997	YDR144C	-0.292114	YOR160W	-0.310612
YER019W	-0.231388	YKL047W	-0.21923	YLL029W	0.279261
YER020W	-0.0718311	YNL058C	-0.211847	YNL315C	0.32493
YER021W	-0.141017	YNR008W	-0.196341	YCL002C	-0.605481
YER022W	0.116943	YHL033C	0.157113	YHR088W	0.411564
YER023W	0.0626959	YER090W	0.160028	YBL090W	0.395987
YER024W	-0.0455544	YDR172W	0.160871	YAL005C	0.231454
YER025W	0.39948	YPL173W	0.289268	YJL186W	-0.257892
YER030W	0.907593	YJR034W	0.349899	YMR290C	0.269536
YER032W	0.0710558	YIR042C	0.455906	YKL060C	0.237766
YER034W	0.152459	YDR065W	-0.373548	YLL027W	0.406982
YER035W	0.833128	YJR011C	-0.356325	YDR532C	-0.572944
YER037W	0.0613402	YNL003C	-0.283876	YBR025C	0.218126
YER038W-A	1.55789	YBR203W	-0.255965	YLR417W	-0.538774
YER040W	-0.385898	YGR097W	-0.242515	YOL060C	-0.348488
YER041W	-1.44771	YCL025C	-0.23522	YMR306W	1.12151
YER042W	0.341443	YLL023C	-0.230983	YBL014C	-0.521134
YER046W	1.24952	YML019W	-0.221443	YCL064C	-0.378143
YER048W-A	1.04739	YLR335W	-0.205348	YJR066W	-0.320883
YER049W	-0.270284	YOR138C	-0.201598	YLL031C	-0.325644
YER051W	0.0662698	YMR200W	-0.196336	YDR497C	-0.291399
YER058W	0.826205	YOL088C	-0.193429	YDR518W	-0.374204
YER059W	0.140359	YDR055W	-0.184546	YDR299W	0.309932
YER060W	-0.756931	YGR135W	-0.17536	YEL060C	0.345019
YER060W-A	-0.737878	YGL123W	0.158123	YDR119W-A	1.58071
YER063W	0.34361	YPR163C	0.161945	YIL033C	0.275281
YER066W	-1.66698	YPL117C	0.169155	YLR268W	0.317291
YER067W	0.589295	YPR063C	0.171612	YAL023C	-0.259587
YER068W	-0.337523	YOR184W	0.180533	YDL148C	0.286873
YER069W	-0.283775	YER167W	0.209709	YJR133W	0.365103
YER070W	-0.28566	YLL022C	0.220123	YLR443W	-0.492651
YER072W	0.506424	YNR024W	0.282654	YLR320W	-0.69452
YER073W	0.114531	YEL012W	0.297286	YBR111C	0.29394
YER074W	0.34567	YJR136C	0.305533	YIR034C	0.288231
YER074W-A	-0.0151313	YPL047W	0.35634	YFR008W	0.605947
YER076W-A	0.458027	YGL176C	0.387147	YJL164C	0.491215
YER079W	0.412843	YBR066C	0.399656	YCL033C	0.357151
YER080W	-0.0143157	YLL059C	1.25063	YGR121C	-0.541373
YER081W	-0.4462	YGL006W-A	-0.717513	YJL084C	-0.393198
YER084W	0.349142	YDL098C	-0.364186	YPR190C	-0.303435
YER086W	-0.0905477	YLR035C	-0.362368	YDR364C	-0.446128
YER087W	-0.229735	YIL092W	-0.358878	YLL035W	-0.450216
YER088W-B	2.00579	YOR005C	-0.328349	YPL012W	-0.293413
YER090W	0.326353	YDL033C	-0.320266	YNL192W	0.277392
YER092W	0.630234	YML006C	-0.298344	YDL126C	0.211742
YER095W	0.638873	YOR266W	-0.281507	YOR318C	-3.35686
YER096W	-0.303562	YDR198C	-0.263866	YMR270C	-0.509454
YER098W	-0.350933	YGL141W	-0.243467	YJR039W	-0.57738
YER100W	0.526544	YPL112C	-0.222833	YMR140W	0.432866
YER102W	0.236231	YJR088C	-0.178108	YCL049C	-0.345879
YER103W	0.761436	YMR238W	-0.176495	YLR105C	-0.531762
YER104W	1.10828	YCL043C	-0.155306	YLR422W	-0.399746
YER106W	-1.1954	YDR212W	-0.148051	YPL211W	0.359888
YER112W	0.211229	YLL045C	0.155363	YPL047W	0.703424
YER117W	0.31892	YGR116W	0.172958	YBR093C	-0.321513
YER120W	0.480851	YDR143C	0.225455	YDR083W	0.334303
YER121W	-0.101943	YBR058C-A	0.241952	YKL026C	1.32087
YER123W	0.386932	YDR243C	0.262264	YOR001W	-0.269531
YER125W	0.430062	YOR003W	0.416758	YDR435C	-0.477642
YER127W	0.155543	YOL150C	2.82853	YMR126C	-0.797125
YER128W	0.299816	YGR259C	-2.66274	YOR207C	-0.274957
YER129W	-0.773062	YPR068C	-0.408673	YCL011C	-0.237999
YER131W	0.520532	YOR097C	-0.341039	YMR316W	-0.538741
YER133W	0.360314	YGR012W	-0.257567	YNL313C	-0.28531
YER136W	0.151389	YCR095C	-0.252999	YDR460W	0.469268
YER138W-A	-2.78637	YBR097W	-0.244401	YOR079C	-0.442725
YER140W	-0.508095	YDL010W	-0.242259	YPR062W	0.264389
YER141W	0.321316	YIL056W	-0.231999	YCR073W-A	0.318981
YER143W	0.334078	YML049C	-0.22133	YMR293C	-0.499859
YER146W	0.397067	YHR199C	-0.220944	YER126C	0.318449
YER148W	0.139189	YNL257C	-0.217546	YBR045C	-0.87399
YER150W	1.98733	YPL155C	-0.212836	YHR115C	0.351574
YER154W	-0.13353	YJR130C	-0.210444	YEL063C	-0.493763
YER157W	-0.295372	YBR162C	-0.205763	YPL202C	0.381581
YER164W	-0.256797	YOR008C	-0.173023	YPL229W	0.543931
YER165W	0.474176	YOR007C	-0.168605	YGL054C	0.291149
YER166W	0.0609955	YHR107C	-0.168176	YPL146C	0.340293
YER167W	0.319925	YNL287W	-0.149922	YPR172W	0.452744
YER169W	-0.0969907	YIL069C	0.161732	YOR308C	0.50078
YER170W	0.715241	YER102W	0.16329	YOR048C	-0.263017
YER171W	-0.208703	YGR270W	0.164982	YNL329C	-0.383805
YER173W	-0.489168	YDR429C	0.177574	YGR088W	1.58204
YER175W-A	2.79722	YNL251C	0.178126	YGR078C	0.330906
YER176W	0.0345346	YDR208W	0.179995	YGR171C	-0.473579
YER177W	0.056911	YPR183W	0.186239	YBL025W	0.722366
YER178W	0.254913	YNL135C	0.19688	YPL224C	-0.514944
YER179W	-0.187097	YLR248W	0.201448	YGL015C	-5.67257
YER182W	0.0771676	YER111C	0.20738	YDL017W	-0.480445
YER187W	0.839164	YNL054W	0.232326	YGL141W	-0.409612
YER188W	-0.285313	YNL308C	0.233803	YJL013C	-0.587537
YFL057C	-1.30698	YKR074W	0.234099	YLR144C	-0.384047
YFL054C	0.320694	YGR058W	0.238323	YKL175W	-0.313191
YFL050C	-1.81252	YDR494W	0.256452	YOL071W	0.444404
YFL048C	-0.124953	YPR006C	0.257869	YER068W	-0.301767
YFL045C	-0.0776638	YKL082C	0.281524	YML120C	0.401463
YFL044C	0.157939	YDR096W	0.309959	YCR031C	0.252958
YFL042C	-0.184565	YDR501W	0.325799	YNL016W	0.218753
YFL039C	0.298462	YJL137C	0.364406	YKL085W	0.29404
YFL038C	0.248661	YOR062C	0.462873	YKL090W	-0.521556
YFL034C-B	-0.0526401	YGL081W	0.646567	YOR047C	0.3993
YFL034C-A	-1.50479	YCR020C	0.67292	YPR175W	-0.402712
YFL033C	-0.0552556	YGL158W	1.16434	YML094W	0.341782
YFL029C	0.0132273	YOR218C	2.10892	YJR058C	-0.476621
YFL028C	-0.167149	YGL150C	0.237361	YNL108C	0.356462
YFL027C	0.153563	YBL099W	0.228151	YGL004C	-0.515837
YFL025C	0.0951571	YGL254W	0.302898	YMR022W	0.297398
YFL024C	-0.427665	YGR130C	0.345662	YLR351C	0.291162
YFL022C	-0.0505696	YLR263W	-0.817063	YER070W	-0.245087
YFL021C-A	-4.04221	YML056C	-0.316627	YDR109C	-0.468101
YFL020C	-1.27603	YMR296C	-0.255315	YDR087C	0.300808
YFL018C	0.274769	YLR056W	-0.168984	YJR154W	-0.942973
YFL017C	-0.109367	YJR017C	0.191291	YJR099W	0.507713
YFL016C	0.139775	YAR019W-A	0.774914	YOR292C	-0.594826
YFL013C	0.169906	YLR033W	-0.198783	YGR132C	0.270887
YFL010C	0.773742	YGR020C	0.189308	YER132C	-0.419287
YFL003C	-0.000407107	YCL038C	-0.250876	YBR249C	0.221612
YFL002C	-0.196045	YGR049W	-0.238751	YHR206W	-0.328854
YFR003C	0.302631	YBR133C	-0.221918	YNL063W	-0.590856
YFR005C	-0.971902	YPR074C	-0.208029	YMR114C	-0.633689
YFR011C	0.362474	YPL057C	-0.193017	YOR356W	-0.304027
YFR014C	-0.150499	YJL171C	-0.146283	YDR397C	0.35117
YFR015C	0.349317	YDL097C	0.210897	YLR021W	-0.495711
YFR016C	0.244359	YGR035C	0.309311	YNL040W	0.352776
YFR017C	1.05617	YOR390W	-0.26522	YDR088C	0.493225
YFR018C	-0.38148	YOL116W	-0.234196	YPL013C	0.453081
YFR024C-A	0.0799042	YJR005W	-0.227328	YOR355W	0.304439
YFR025C	0.0321943	YEL026W	0.179716	YDR032C	0.243342
YFR026C	0.0342876	YMR319C	-0.227108	YDR197W	0.497319
YFR028C	-0.568052	YOR193W	0.354734	YGL003C	-0.484628
YFR031C	-0.442826	YOR316C	-0.262211	YGL233W	-0.332397
YFR031C-A	0.308422	YPR080W	0.145764	YHL027W	0.329698
YFR032C-A	0.498127	YOL155C	0.262232	YPR055W	-0.363908
YFR033C	0.878052	YGR211W	0.174921	YJL098W	-0.288567
YFR034C	-0.22603	YHR122W	0.194125	YGL119W	-0.380996
YFR037C	0.116363	YGR004W	-0.278173	YBL074C	-0.570806
YFR039C	-0.264391	YKL023W	0.290455	YAL061W	0.750747
YFR041C	-0.298061	YBL039W-B	0.570747	YPR104C	-0.384533
YFR043C	0.231937	YBR084C-A	0.169555	YDL191W	0.21586
YFR044C	0.203282	YPR141C	0.242871	YNL045W	-0.300005
YFR046C	-0.6019	YMR041C	-0.272233	YDL095W	-0.260013
YFR047C	0.0957519	YNR061C	-0.257752	YDR374W-A	0.647338
YFR050C	0.198269	YMR018W	2.16073	YNL103W	-0.345344
YFR051C	-0.224298	YJL152W	-1.14998	YDR505C	0.271721
YFR053C	0.206831	YJL147C	-0.3186	YGR138C	-0.324658
YFL055W	-0.732801	YDR385W	-0.208991	YPL183C	-0.283095
YFL053W	-0.0179146	YLR121C	-0.208341	YOL027C	0.256553
YFL052W	0.349944	YDL116W	-0.201571	YCR052W	0.254929
YFL049W	-0.980698	YFL009W	-0.197951	YGR128C	-0.329598
YFL047W	-0.313191	YBR086C	-0.168966	YCR088W	0.259729
YFL046W	0.244221	YMR233W	0.240493	YJL204C	-0.36767
YFL041W-A	-2.83666	YAL046C	0.243276	YMR121C	0.243688
YFL041W	-0.04136	YNL084C	0.248011	YDL206W	-0.773749
YFL037W	0.159749	YNL056W	0.251902	YGL162W	0.563145
YFL036W	-0.0754152	YNL306W	0.280997	YPR080W	0.214771
YFL034W	-0.0520901	YJR099W	0.284472	YOR099W	-0.237479
YFL031W	0.702743	YHR088W	0.290652	YGR173W	0.253692
YFL030W	0.701427	YPR109W	0.303617	YLL018C	0.212297
YFL026W	-10.1395	YER058W	0.422398	YHR047C	-0.293496
YFL023W	0.492913	YEL070W	0.875993	YPL011C	-0.434459
YFL021W	-0.0582166	YOR133W	-0.207096	YJR097W	0.587345
YFL017W-A	0.241672	YHR197W	-0.374471	YJL139C	-0.556186
YFL014W	0.76926	YOR245C	-0.225882	YLR039C	-0.380709
YFL011W	-0.507591	YJR140C	-0.230543	YIL120W	-0.909221
YFL009W	-0.239787	YML035C	0.173915	YJR010W	-0.339242
YFL008W	0.117611	YLR408C	0.543807	YBR272C	-0.340403
YFL007W	-0.035961	YJL006C	-0.266246	YHL009C	0.531026
YFL005W	0.594314	YCR066W	-0.279196	YDL088C	-0.337107
YFL004W	0.0982666	YPR118W	0.163769	YDL051W	-0.267766
YFL001W	-0.366072	YDR137W	-0.227961	YER134C	0.361688
YFR001W	0.406555	YLL018C-A	0.322166	YHR031C	-0.4305
YFR002W	-0.121957	YGL139W	-0.259412	YDR208W	0.294756
YFR004W	0.339097	YLR267W	0.473903	YOR269W	-0.635812
YFR006W	0.0215104	YLR034C	-0.304926	YBR267W	0.328456
YFR007W	-0.156212	YPR049C	-0.263248	YNR030W	-0.338069
YFR008W	0.658836	YOR127W	0.199273	YGL113W	-0.606124
YFR009W	0.112996	YPR089W	-0.189518	YOL100W	-0.451857
YFR010W	0.0410411	YML095C	0.319873	YOL053W	-0.463482
YFR013W	-0.207255	YLL013C	0.166334	YFR004W	0.250925
YFR019W	-0.285527	YCR020W-B	0.303037	YHR177W	0.703267
YFR020W	-1.86985	YDR486C	0.230024	YBR118W	0.212058
YFR021W	-0.246122	YNR062C	-1.38003	YGR230W	0.642367
YFR022W	-0.250644	YIL029C	-0.755148	YHL048W	-0.326231
YFR023W	-1.02475	YJL214W	-0.529859	YBR151W	0.32397
YFR027W	0.291365	YNL234W	-0.462473	YOR319W	-0.562628
YFR029W	-0.167331	YGL144C	-0.353026	YGR278W	-0.435539
YFR030W	-0.716506	YPR079W	-0.286534	YBR130C	0.328481
YFR034W-A	0.052123	YJL181W	-0.267553	YLR213C	-0.965283
YFR038W	-0.233215	YPL279C	-0.260613	YFL030W	0.837553
YFR040W	-0.691943	YDR142C	-0.259199	YNL071W	0.213955
YFR042W	-0.510784	YOR205C	-0.250482	YDL207W	-0.440942
YFR045W	-0.133318	YMR281W	-0.249075	YER098W	-0.618314
YFR048W	-0.0147291	YDR492W	-0.241467	YGR077C	-0.409419
YFR049W	0.76435	YJL082W	-0.232463	YML115C	-0.274515
YFR052W	0.0101532	YKL174C	-0.217391	YNL197C	0.287939
YFR055W	0.161164	YKL092C	-0.213396	YPL032C	-0.299683
YGL257C	-0.730418	YLR065C	-0.206433	YMR319C	-0.366636
YGL252C	0.073126	YHR037W	-0.199223	YBL059C-A	0.461273
YGL251C	-0.50188	YMR125W	-0.198025	YEL052W	-0.330921
YGL246C	-0.0936651	YNL130C	-0.185471	YOL097W-A	-4.46886
YGL242C	0.798756	YGL252C	-0.163991	YGL011C	0.244455
YGL237C	0.423578	YML048W	-0.15656	YEL020W-A	0.375895
YGL236C	0.203854	YBR118W	0.14149	YNL252C	0.314265
YGL231C	0.00814733	YHR082C	0.163003	YDR319C	-0.529213
YGL230C	0.545851	YHR108W	0.177923	YER078C	-0.380224
YGL229C	-0.320894	YNL116W	0.202408	YDR482C	0.659235
YGL226C-A	0.574784	YOR142W	0.21091	YOR096W	0.236584
YGL224C	-0.105065	YDL165W	0.212541	YGL167C	-0.23557
YGL223C	-1.06363	YDR348C	0.223793	YBR292C	-4.07111
YGL222C	0.64525	YLR003C	0.224616	YJR082C	0.539279
YGL221C	0.080624	YDR468C	0.237642	YMR171C	-0.389159
YGL219C	0.0970503	YOR027W	0.253991	YML007W	0.268073
YGL213C	0.203862	YOR111W	0.264078	YKL059C	0.391527
YGL206C	0.195855	YOL080C	0.266172	YPL223C	1.42969
YGL204C	2.70478	YBL021C	0.277903	YHL016C	-2.19313
YGL203C	-0.414754	YLR201C	0.295284	YNR037C	0.405518
YGL201C	0.00673572	YMR136W	0.309817	YDR365C	0.257029
YGL200C	-0.039932	YGR006W	0.353989	YNL281W	0.224342
YGL199C	-4.4378	YER128W	0.361667	YNR014W	1.01942
YGL194C-A	-0.204144	YMR252C	0.408218	YJL178C	-0.288109
YGL194C	-0.11845	YMR156C	0.452612	YPL075W	-0.393977
YGL193C	-0.583841	YKL170W	0.264168	YPR048W	-0.331527
YGL190C	0.249749	YDR059C	0.288712	YLL057C	1.26402
YGL189C	-0.151767	YOR026W	-0.283717	YPL179W	0.302801
YGL187C	0.641457	YML072C	-0.146358	YIR036C	0.372646
YGL186C	-0.215119	YGR203W	0.213034	YJL206C	-0.575437
YGL185C	-0.235299	YDL136W	0.170254	YAL019W	-0.268493
YGL184C	-0.178727	YNL087W	-0.291245	YHL024W	0.438969
YGL179C	-0.695137	YKR054C	-0.263615	YLR204W	0.360924
YGL176C	-0.563113	YML102W	-0.20328	YLR087C	-0.389118
YGL175C	-0.771664	YCL050C	0.151699	YFR050C	0.23706
YGL173C	0.270734	YGR247W	0.223876	YPL164C	-0.638142
YGL167C	-0.193793	YMR184W	0.300174	YLR354C	0.205548
YGL165C	0.577607	YDR512C	0.309115	YBR283C	-0.236158
YGL164C	-0.0259342	YMR087W	0.329792	YBR063C	-1.82618
YGL163C	-0.159669	YGL065C	-0.175377	YGL186C	-0.322325
YGL161C	0.190818	YKL105C	0.220787	YER048C	0.255141
YGL154C	-1.23356	YMR055C	-0.28829	YNL254C	-0.609619
YGL150C	0.102366	YFL044C	0.222652	YIR029W	-0.93276
YGL147C	0.0103836	YOR078W	0.243783	YDR322W	0.288479
YGL146C	-0.771044	YOL121C	0.132269	YJL023C	-0.602961
YGL144C	-0.331666	YGR077C	-0.219404	YPL176C	-0.278077
YGL143C	-0.0254159	YDL198C	-0.157449	YBR273C	0.322802
YGL142C	-0.503683	YPL105C	0.182603	YHR183W	0.250182
YGL140C	-0.273924	YNL278W	0.218488	YPL041C	0.737078
YGL136C	-0.449054	YCR097W	-0.261803	YOR008C	0.292963
YGL131C	-0.173695	YKR067W	-0.238204	YHR182W	-0.571219
YGL129C	-0.0163345	YNL209W	-0.207228	YAR019C	-0.509536
YGL128C	-0.611019	YNL149C	-0.178468	YML100W	0.774302
YGL127C	-0.0234893	YKL184W	0.14275	YMR143W	0.214297
YGL124C	0.283923	YDR389W	0.175271	YDR407C	-0.318397
YGL122C	0.24971	YHR089C	0.187234	YKR062W	0.329869
YGL121C	0.662997	YKL183W	0.195462	YMR187C	-0.56738
YGL120C	0.0423935	YGR002C	0.202921	YHR048W	-0.765363
YGL112C	0.0149684	YHR119W	0.208223	YER053C	0.415456
YGL110C	-0.103699	YKL016C	0.233278	YMR079W	0.228376
YGL108C	0.747952	YDL080C	0.234123	YLR460C	-0.804602
YGL107C	0.0270669	YPR178W	0.24821	YMR223W	0.401294
YGL104C	-0.601598	YLR456W	0.526602	YBR126C	0.287979
YGL095C	-0.137383	YDR397C	0.186402	YDR201W	0.508529
YGL094C	-0.235572	YNL291C	0.2569	YOL137W	-0.372218
YGL091C	0.0335536	YKL062W	0.266862	YMR020W	-0.485674
YGL089C	0.655145	YJR095W	-1.05802	YDR214W	0.241794
YGL087C	0.526878	YGL033W	-1.02621	YDR124W	-1.02078
YGL084C	-0.351632	YJL118W	-0.430416	YDR494W	0.326915
YGL078C	0.193897	YDR332W	-0.374941	YGR031W	0.391924
YGL077C	0.112712	YEL004W	-0.331986	YJR061W	-0.671802
YGL076C	0.118903	YEL059C-A	-0.314428	YAR003W	0.439633
YGL075C	0.450665	YAL029C	-0.309261	YOR091W	0.289306
YGL072C	-0.0845508	YBL052C	-0.308247	YNL209W	-0.171231
YGL070C	0.701139	YOR222W	-0.307809	YDR176W	-0.399543
YGL065C	-0.134876	YBR021W	-0.303528	YNL215W	0.368019
YGL064C	0.175841	YKR051W	-0.299688	YNR023W	-0.381437
YGL061C	0.23085	YGR071C	-0.256929	YDL058W	-0.289033
YGL057C	0.213215	YDR479C	-0.250575	YHR005C	-0.243691
YGL056C	-0.338064	YOR037W	-0.243043	YER007W	-0.657182
YGL054C	0.334382	YOR048C	-0.239524	YHR104W	0.310577
YGL049C	0.164956	YDR202C	-0.230828	YIL108W	-0.2792
YGL048C	0.381833	YEL056W	-0.221718	YLR004C	-1.26495
YGL044C	0.624051	YKR082W	-0.216578	YEL005C	-0.684353
YGL040C	0.298679	YKR028W	-0.214741	YFL047W	-0.325046
YGL038C	-0.0709349	YOL007C	-0.205352	YBR278W	-0.591698
YGL037C	0.473663	YFL016C	-0.205329	YGR058W	0.460318
YGL035C	-0.162391	YJL194W	-0.204376	YMR111C	-0.537199
YGL032C	-1.64752	YMR113W	-0.192249	YMR194C-B	0.988365
YGL031C	0.387925	YOR070C	-0.190766	YPL015C	-0.370423
YGL028C	-0.14636	YEL042W	-0.188134	YDL248W	0.265816
YGL027C	-0.372335	YPR128C	-0.182871	YJL179W	0.360297
YGL026C	0.219171	YJR077C	-0.168152	YKL204W	0.276227
YGL025C	-0.267958	YJR161C	-0.151512	YKR041W	0.987108
YGL023C	-0.0737937	YNL044W	-0.14568	YJL070C	-0.473495
YGL020C	-0.158797	YJR015W	-0.141681	YER133W	0.239013
YGL018C	0.297754	YJL034W	-0.138237	YGL041W-A	0.430597
YGL013C	-0.395255	YMR203W	-0.136231	YOR340C	0.241873
YGL011C	0.253642	YKL060C	0.135752	YER061C	-0.476989
YGL009C	0.230807	YBR048W	0.137097	YER026C	0.224117
YGL008C	0.260143	YLR244C	0.142705	YIR016W	1.04806
YGL007C-A	-0.0647929	YLR229C	0.153257	YDL135C	0.276971
YGL005C	-0.207324	YIL140W	0.15389	YLR274W	-0.288081
YGL004C	-0.355593	YLL024C	0.155037	YPL083C	-0.395915
YGL003C	-0.53052	YBR031W	0.159453	YHR112C	-0.392281
YGL001C	0.022165	YLR410W	0.161743	YPL090C	0.199786
YGR001C	0.0254293	YCR028C-A	0.166454	YNL021W	-0.341135
YGR002C	0.0888212	YFL008W	0.173286	YPL004C	0.238813
YGR005C	0.440094	YCL018W	0.175445	YGR071C	-0.42239
YGR008C	1.21437	YER114C	0.178584	YBR244W	-0.546223
YGR009C	0.302494	YMR062C	0.178606	YOL052C	-0.284283
YGR015C	-0.560344	YHL004W	0.179098	YKR087C	-0.46725
YGR020C	0.757536	YPR023C	0.180819	YJL096W	0.415674
YGR024C	-0.822662	YEL017C-A	0.184949	YPR072W	0.256244
YGR027C	0.286589	YBR173C	0.186469	YLR368W	-0.513843
YGR030C	0.226618	YAL005C	0.18663	YIL093C	0.345619
YGR033C	0.314857	YHL025W	0.186861	YBR019C	-2.37958
YGR035C	0.431231	YLR019W	0.194342	YFL055W	-0.848397
YGR036C	0.673542	YAL039C	0.198339	YGR047C	-0.347916
YGR037C	0.599348	YKR065C	0.198679	YLR037C	-1.32252
YGR043C	0.379158	YNR001C	0.199603	YML050W	-0.574475
YGR044C	0.42673	YMR074C	0.202401	YDR266C	0.277779
YGR045C	-0.937088	YNL078W	0.203038	YNL026W	-0.383256
YGR047C	-0.419726	YDR381W	0.206421	YGR113W	0.360343
YGR050C	-0.758221	YPL055C	0.208415	YNL176C	-0.369612
YGR053C	-0.488546	YNL074C	0.213772	YEL008C-A	3.53633
YGR057C	0.024463	YML027W	0.215648	YOL076W	-0.287432
YGR061C	-0.0841358	YKL161C	0.217868	YDR512C	0.41535
YGR062C	-0.0195452	YDL028C	0.218404	YPL193W	0.427493
YGR063C	0.140407	YML025C	0.218613	YOR187W	0.23039
YGR065C	-0.510979	YFL017C	0.220765	YJL134W	-0.299493
YGR067C	-0.301435	YHR092C	0.224831	YGR135W	-0.218611
YGR068C	-0.10603	YOR069W	0.225181	YNL025C	0.480381
YGR071C	-0.303074	YNL295W	0.22887	YDR182W	-0.285111
YGR073C	-0.578755	YJR091C	0.234533	YDR307W	-0.3369
YGR075C	-0.195133	YMR229C	0.236022	YBR050C	-1.30778
YGR076C	0.224028	YDL025C	0.241403	YBR038W	0.229593
YGR077C	-0.508487	YAL032C	0.243112	YOL135C	0.463582
YGR078C	0.253666	YDL106C	0.247297	YIR018W	0.53407
YGR081C	-0.0208104	YLR098C	0.247709	YOR021C	0.241607
YGR083C	0.0776617	YMR195W	0.261004	YAL049C	0.294408
YGR084C	-0.124314	YIL084C	0.269369	YJR067C	0.462132
YGR085C	0.127534	YOR052C	0.290898	YDR238C	0.206226
YGR086C	0.165306	YKL061W	0.30751	YBR264C	-0.450639
YGR087C	-1.1326	YLR245C	0.325221	YLR007W	-0.486749
YGR095C	0.19669	YNL148C	0.336543	YDR180W	-0.381225
YGR098C	-0.439761	YDR541C	0.347473	YLR438C-A	0.311597
YGR102C	0.174121	YJR135C	0.368167	YCR024C-A	0.31801
YGR104C	-0.183601	YHR153C	0.548621	YGL006W-A	1.94023
YGR106C	0.0262919	YGL146C	0.711253	YMR155W	-0.435711
YGR109C	-0.111268	YAR033W	-0.289519	YER123W	0.339361
YGR117C	-0.62823	YGL104C	-0.284355	YER015W	-0.505296
YGR119C	0.253105	YLR336C	-0.23365	YKR082W	-0.253087
YGR120C	-0.160032	YDL227C	-0.201622	YMR269W	0.467032
YGR121C	-0.416703	YHL048W	-0.190496	YNL044W	0.273807
YGR122C-A	-0.380133	YPL023C	-0.158024	YOL129W	0.307246
YGR123C	0.207955	YGL008C	-0.15358	YGL040C	0.266125
YGR128C	-0.239954	YPL260W	0.185529	YGR019W	-0.28904
YGR130C	0.195721	YKR092C	0.207879	YIL011W	-0.642801
YGR132C	0.416737	YLR257W	0.216671	YMR129W	-0.228673
YGR138C	-0.303224	YNL032W	0.217869	YPL028W	0.228822
YGR146C	0.4177	YBR146W	0.222472	YHL001W	0.196059
YGR146C-A	2.00261	YNL218W	0.229588	YNL154C	0.242819
YGR147C	0.347001	YPL013C	0.264114	YOL067C	0.415856
YGR148C	0.251729	YER138W-A	0.26816	YER056C-A	0.235787
YGR150C	-0.0413335	YDL181W	0.316516	YKR054C	-0.325098
YGR154C	-1.40266	YIL013C	0.388064	YOR089C	0.291725
YGR158C	0.474398	YMR056C	0.472245	YDR383C	-0.648699
YGR159C	0.146579	YLR343W	-0.727076	YBR044C	-0.429592
YGR161C	0.120076	YNL136W	-0.27239	YLR370C	0.241362
YGR168C	-1.4092	YHR031C	-0.245068	YPR093C	0.520164
YGR169C	-0.19968	YPL198W	0.133477	YMR060C	-0.427896
YGR169C-A	1.74455	YOR212W	0.174612	YOR196C	-0.304035
YGR171C	-0.538868	YMR255W	0.232789	YFL048C	-0.23096
YGR172C	0.155626	YLR289W	0.267708	YJR116W	-0.545305
YGR174C	0.227288	YER071C	0.316175	YHR086W	0.33662
YGR175C	0.0551291	YKL109W	0.242093	YLR006C	-0.400195
YGR177C	-0.136886	YAL060W	0.267221	YJL217W	0.344455
YGR178C	0.392192	YCL059C	0.193933	YPL180W	0.313686
YGR179C	0.0396395	YBR009C	0.145348	YOR238W	-0.482346
YGR180C	0.0552168	YLR315W	0.375618	YLR439W	0.331195
YGR182C	-2.46368	YFL003C	-0.898614	YER042W	0.287993
YGR183C	1.54379	YIL149C	-0.333382	YMR125W	-0.240599
YGR184C	-0.154379	YBL079W	-0.256526	YNR054C	0.339254
YGR185C	0.0409405	YDR395W	-0.231174	YNL027W	0.302398
YGR187C	0.0438143	YGL125W	-0.204174	YBL081W	0.368677
YGR188C	-1.18388	YBR248C	-0.193689	YDR410C	-0.470979
YGR189C	0.0420081	YIL126W	-0.19228	YOL095C	-0.526532
YGR192C	0.00643294	YPR016C	-0.181716	YCR084C	0.21018
YGR193C	0.292639	YHR100C	0.240274	YPL207W	-0.241721
YGR194C	-0.18616	YIL036W	0.274912	YFL023W	0.327985
YGR196C	0.147317	YBR282W	0.276655	YLL054C	-0.541812
YGR197C	-0.0615823	YHR016C	0.283417	YMR011W	0.217555
YGR200C	0.117335	YHR198C	-0.272075	YKL021C	-0.284588
YGR201C	1.16831	YDR166C	-0.21777	YLR194C	0.218577
YGR202C	-0.707089	YOR332W	0.173826	YMR117C	0.628134
YGR207C	0.397477	YNL007C	0.260158	YKL218C	0.334743
YGR209C	0.583396	YOL157C	0.368044	YBL038W	0.318023
YGR210C	-0.48548	YIR026C	-0.244161	YMR005W	0.332062
YGR213C	0.342443	YCR067C	-0.176463	YDR200C	-0.403823
YGR216C	-0.392575	YDR460W	0.222258	YDL136W	0.196914
YGR220C	0.100024	YDL099W	0.260595	YDL180W	-0.43592
YGR221C	-0.0570799	YNL176C	-0.216646	YIL102C-A	0.694619
YGR223C	-0.456243	YGL058W	0.151852	YOL070C	0.258731
YGR229C	0.0267826	YHR023W	0.193863	YMR224C	-0.42318
YGR231C	0.252947	YLR346C	0.754401	YNR051C	0.252837
YGR233C	-0.377705	YLR041W	-1.40095	YBR070C	-0.477238
YGR235C	0.109071	YBR294W	-0.59471	YDR070C	1.46387
YGR236C	2.93539	YCL002C	-0.35697	YNL002C	0.246735
YGR237C	-0.159703	YNL223W	-0.270069	YNL265C	0.357884
YGR238C	-0.583401	YDR267C	-0.251271	YPR188C	0.333196
YGR239C	0.181452	YMR224C	-0.237935	YLR392C	-0.488396
YGR240C	0.355299	YIL001W	-0.228593	YDL187C	-3.84592
YGR241C	-0.134678	YMR189W	-0.205149	YPR140W	-0.361933
YGR244C	0.302656	YKR088C	-0.196024	YKR070W	-0.319569
YGR245C	0.192628	YBR177C	-0.179059	YOR167C	0.248896
YGR246C	-0.00775127	YDL193W	-0.172937	YER079W	0.570365
YGR250C	0.343252	YHR050W	-0.165665	YOR132W	0.295982
YGR253C	-0.0251004	YNL263C	-0.155799	YAL004W	5.0758
YGR255C	-0.0884669	YOL057W	-0.153956	YKR055W	0.651828
YGR257C	-0.466734	YML086C	-0.131498	YDR035W	0.233847
YGR258C	-0.323601	YLR300W	-0.121597	YDL229W	-0.161318
YGR259C	-2.83785	YOR323C	0.128151	YHL019C	-0.443393
YGR261C	0.133861	YKR094C	0.132271	YGL216W	-0.338193
YGR262C	0.0700685	YER025W	0.133636	YPR058W	-0.283772
YGR263C	-0.748168	YDR454C	0.139029	YNL279W	-1.36091
YGR264C	-0.315872	YER074W	0.140387	YER105C	-0.234618
YGR267C	0.165854	YAL021C	0.145973	YDL113C	-0.396846
YGR268C	0.811747	YOR204W	0.147901	YCR066W	-0.402701
YGR271C-A	0.104665	YBL036C	0.149451	YER012W	0.248599
YGR274C	-0.502392	YLR310C	0.151915	YHR128W	0.184442
YGR276C	-0.132249	YGR078C	0.153413	YGR085C	0.18587
YGR277C	-0.0452151	YBL027W	0.153561	YGR139W	5.81041
YGR279C	-0.0140503	YOL031C	0.159527	YMR086C-A	-3.87806
YGR280C	0.861117	YKL069W	0.182014	YMR112C	0.520665
YGR282C	0.206943	YML121W	0.194865	YPL006W	-0.275249
YGR283C	-0.189182	YLR049C	0.205448	YBL045C	0.198531
YGR284C	0.235439	YDR168W	0.206918	YBL041W	0.227414
YGR285C	0.28359	YBL066C	0.208084	YDR519W	0.284315
YGR286C	-0.0059256	YJL166W	0.212371	YLL050C	0.198079
YGR287C	-0.299059	YLR116W	0.219658	YDL226C	0.224348
YGR289C	-1.12999	YER047C	0.219903	YGL253W	0.190647
YGL258W	1.89562	YAL044C	0.236101	YKR031C	-0.302326
YGL256W	-1.72954	YDR148C	0.244526	YOR323C	0.192722
YGL255W	-0.882898	YDL241W	0.260712	YLR060W	-0.186016
YGL254W	0.055411	YDR370C	0.266136	YBL092W	0.199421
YGL253W	0.259487	YMR299C	0.28676	YML130C	-0.277525
YGL250W	0.0760573	YDL129W	0.380073	YMR154C	-0.582031
YGL248W	-0.335246	YIL152W	0.413755	YEL041W	-0.645525
YGL247W	-0.774725	YDL244W	0.428806	YDR471W	0.198826
YGL245W	0.22861	YBR050C	0.573876	YER063W	0.269914
YGL244W	0.453514	YLR025W	0.179551	YKL106C-A	5.01181
YGL243W	-0.552498	YLR285C-A	-0.817155	YJR068W	-0.274846
YGL241W	-0.190072	YDR008C	-0.768595	YMR228W	-0.353972
YGL240W	0.491073	YLR266C	-0.332961	YDR101C	-0.218014
YGL238W	-0.064791	YER007W	-0.324287	YPR138C	-0.339968
YGL234W	0.214991	YHR204W	-0.301339	YLR286C	-0.203636
YGL233W	-0.205797	YBR183W	-0.288753	YHL037C	-3.63693
YGL232W	0.270412	YKL072W	-0.272635	YGL136C	-0.584491
YGL228W	-0.3482	YPR101W	-0.270485	YKL062W	0.342994
YGL227W	-0.0388322	YLR215C	-0.26802	YGR281W	-0.22815
YGL226W	0.255661	YJR132W	-0.267255	YOR320C	-0.332262
YGL225W	-0.211811	YDR131C	-0.263112	YKL020C	0.31245
YGL220W	0.273782	YOR307C	-0.254997	YBL093C	0.34578
YGL216W	-0.130497	YJL092W	-0.25241	YNL142W	-0.873633
YGL215W	0.1589	YLR103C	-0.251749	YGL175C	-0.859586
YGL212W	0.0932681	YAL062W	-0.243067	YPR036W	0.232911
YGL211W	-0.251904	YML098W	-0.224733	YOR274W	-0.387763
YGL210W	-0.216056	YER049W	-0.222971	YPR004C	0.264427
YGL209W	0.075945	YIL040W	-0.217157	YKL187C	1.39078
YGL208W	0.2245	YLR342W	-0.216898	YPL192C	2.46214
YGL207W	0.0311056	YJL180C	-0.215291	YJL076W	-0.232081
YGL205W	0.69236	YNL139C	-0.213929	YGR274C	-0.323589
YGL202W	0.134616	YDL121C	-0.212754	YGR080W	0.293345
YGL198W	0.0124658	YPL161C	-0.211495	YLR218C	0.614527
YGL197W	-0.232073	YBL098W	-0.209264	YLR342W	-0.185774
YGL196W	0.0163216	YER110C	-0.196653	YLL033W	0.682544
YGL195W	0.0670785	YMR078C	-0.194369	YNL090W	0.391047
YGL191W	0.598211	YDR390C	-0.191864	YER157W	-0.334728
YGL181W	0.296438	YLR090W	-0.191699	YJL005W	-0.275866
YGL180W	0.377648	YFR047C	-0.190887	YLR226W	0.3673
YGL178W	-0.130322	YIL048W	-0.190551	YHR174W	0.233038
YGL174W	0.290954	YOR110W	-0.188657	YNL138W-A	0.52468
YGL172W	-0.0673772	YBR251W	-0.182764	YJL109C	-0.234575
YGL171W	0.256013	YLR373C	-0.180018	YHR070W	0.297654
YGL169W	0.147654	YNL049C	-0.167328	YGR028W	-0.327709
YGL166W	0.521099	YGR231C	-0.16377	YOR278W	-0.512106
YGL162W	-0.332179	YML088W	-0.16342	YJL019W	-0.351357
YGL160W	-0.28457	YNL121C	-0.156309	YDR447C	0.199486
YGL159W	-0.521654	YKL104C	-0.155661	YAL026C	-0.242557
YGL158W	-0.759996	YGL201C	-0.153417	YGR186W	0.226398
YGL157W	0.00244432	YDR335W	-0.1528	YPL178W	0.241914
YGL156W	0.227185	YDL015C	-0.1431	YGR289C	-0.975315
YGL155W	-0.0741306	YBR286W	-0.142675	YPR020W	0.242156
YGL153W	-0.0347002	YGR106C	-0.138332	YDR392W	-0.417453
YGL151W	-0.205336	YGR254W	-0.137589	YOL069W	-0.424366
YGL148W	0.236729	YMR054W	-0.136996	YML022W	0.223034
YGL145W	-0.186448	YPL262W	-0.1326	YLR166C	-0.308592
YGL141W	-0.294076	YLR100W	-0.128877	YKL064W	-0.278372
YGL139W	-0.0515722	YNL327W	0.122869	YAL022C	-0.279726
YGL137W	0.015845	YIL109C	0.126602	YKL197C	-0.3422
YGL135W	0.319332	YOR293W	0.130067	YGR215W	0.376593
YGL134W	-0.827615	YNL030W	0.137923	YLR180W	0.205801
YGL133W	-0.00604263	YLR185W	0.140701	YOR371C	-0.373581
YGL130W	0.131604	YDL075W	0.14134	YNL326C	-0.445367
YGL125W	-0.328591	YOL049W	0.1471	YCR046C	0.300594
YGL123W	0.236991	YIR034C	0.148563	YKL109W	0.301656
YGL119W	-0.404404	YDL191W	0.149774	YMR264W	-0.334978
YGL117W	0.0350264	YIR011C	0.150538	YDL153C	0.248633
YGL116W	-0.234634	YLR371W	0.151552	YBR261C	0.273912
[truncated: 3,494 more rows]
