# Supplementary material for: Decapping factor Dcp2 controls mRNA abundance and translation to adjust metabolism and filamentation to nutrient availability
Source: eLife journal article supplement (doi:10.7554/elife.85545), 2023-06-02
Supplement: fig7-data4 [file Figure 7 – source data 4.xlsx]

## Sheet: Sheet1
	MFI/OD
Sample	TMRM	FCCP
WT_1	6084.06	1449.28
WT_2	5033.08	2010.53
WT_3	4550.9	3112.28
dcp2 + pDCP2_1	2147.02	995.633
dcp2 + pDCP2_2	2462.13	1525.5
dcp2 + pDCP2_3	2372.88	679.507
dcp2_1	13088.4	2769.13
dcp2_2	13625.7	2788.57
dcp2_3	15983.6	3152.39
	MFI/OD
Avg	TMRM	FCCP
WT	5222.68	2190.69
dcp2 + pDCP2	2327.34	1066.88
dcp2	14232.6	2903.36
