# Supplementary material for: Decapping factor Dcp2 controls mRNA abundance and translation to adjust metabolism and filamentation to nutrient availability
Source: eLife journal article supplement (doi:10.7554/elife.85545), 2023-06-02
Supplement: fig8-figsupp2-data1 [file Figure 8 – figure supplement 2 – source data 1.xlsx]

## Sheet: Sheet1
iESR	Msn2-iESR	non-Msn2-iESR	Msn2-targets
YAL061W	YAL061W	YBL049W	YAL005C
YBR072W	YBR072W	YBL064C	YAL013W
YBR126C	YBR126C	YBL075C	YAL038W
YCL040W	YCL040W	YBL078C	YAL039C
YDL022W	YDL022W	YBR006W	YAL060W
YDL222C	YDL222C	YBR026C	YAL061W
YDR074W	YDR074W	YBR052C	YAR035W
YDR096W	YDR096W	YBR053C	YBL015W
YDR171W	YDR171W	YBR056W	YBL021C
YDR380W	YDR380W	YBR139W	YBL029C-A
YDR516C	YDR516C	YBR149W	YBL044W
YEL011W	YEL011W	YBR169C	YBL058W
YER150W	YER150W	YBR183W	YBR067C
YFL014W	YFL014W	YBR204C	YBR072W
YFR053C	YFR053C	YBR230C	YBR078W
YGR088W	YGR088W	YBR269C	YBR079C
YGR161C	YGR161C	YBR285W	YBR081C
YGR250C	YGR250C	YBR287W	YBR083W
YHR096C	YHR096C	YCL035C	YBR085C-A
YIL099W	YIL099W	YCL042W	YBR114W
YJR104C	YJR104C	YCR004C	YBR118W
YKL035W	YKL035W	YCR061W	YBR126C
YKL151C	YKL151C	YCR091W	YCL025C
YLL019C	YLL019C	YDL021W	YCL040W
YLL026W	YLL026W	YDL023C	YCR005C
YLL039C	YLL039C	YDL027C	YCR012W
YLR178C	YLR178C	YDL110C	YCR021C
YLR258W	YLR258W	YDL124W	YDL022W
YLR327C	YLR327C	YDL199C	YDL048C
YML100W	YML100W	YDL204W	YDL125C
YML128C	YML128C	YDR001C	YDL173W
YMR081C	YMR081C	YDR003W	YDL222C
YMR105C	YMR105C	YDR032C	YDR011W
YMR173W	YMR173W	YDR059C	YDR038C
YMR251W-A	YMR251W-A	YDR070C	YDR040C
YNL241C	YNL241C	YDR085C	YDR073W
YOL084W	YOL084W	YDR169C	YDR074W
YOR317W	YOR317W	YDR204W	YDR077W
YOR374W	YOR374W	YDR254W	YDR096W
YPL230W	YPL230W	YDR255C	YDR134C
YPR149W	YPR149W	YDR258C	YDR150W
YBL049W		YDR272W	YDR155C
YBL064C		YDR286C	YDR171W
YBL075C		YDR287W	YDR216W
YBL078C		YDR350C	YDR247W
YBR006W		YDR358W	YDR259C
YBR026C		YDR368W	YDR276C
YBR052C		YDR453C	YDR309C
YBR053C		YDR512C	YDR342C
YBR056W		YDR513W	YDR343C
YBR139W		YDR533C	YDR380W
YBR149W		YEL005C	YDR406W
YBR169C		YEL012W	YDR420W
YBR183W		YEL039C	YDR508C
YBR204C		YEL060C	YDR516C
YBR230C		YER035W	YDR525W-A
YBR269C		YER037W	YEL011W
YBR285W		YER038C	YEL017W
YBR287W		YER053C	YEL034W
YCL035C		YER079W	YEL046C
YCL042W		YER103W	YER045C
YCR004C		YER119C	YER054C
YCR061W		YER141W	YER064C
YCR091W		YER142C	YER067W
YDL021W		YER158C	YER088C
YDL023C		YFL044C	YER150W
YDL027C		YGL006W	YFL014W
YDL110C		YGL010W	YFR015C
YDL124W		YGL037C	YFR017C
YDL199C		YGL059W	YFR033C
YDL204W		YGL087C	YFR053C
YDR001C		YGL096W	YGL008C
YDR003W		YGL104C	YGL045W
YDR032C		YGL121C	YGL055W
YDR059C		YGL156W	YGL062W
YDR070C		YGL180W	YGL122C
YDR085C		YGL208W	YGL126W
YDR169C		YGL248W	YGL178W
YDR204W		YGR008C	YGL188C-A
YDR254W		YGR019W	YGL255W
YDR255C		YGR023W	YGR050C
YDR258C		YGR043C	YGR060W
YDR272W		YGR127W	YGR067C
YDR286C		YGR149W	YGR088W
YDR287W		YGR194C	YGR142W
YDR350C		YGR201C	YGR146C
YDR358W		YGR209C	YGR161C
YDR368W		YGR237C	YGR180C
YDR453C		YGR248W	YGR192C
YDR512C		YGR256W	YGR249W
YDR513W		YHL021C	YGR250C
YDR533C		YHR087W	YGR254W
YEL005C		YHR097C	YHL024W
YEL012W		YHR104W	YHR007C
YEL039C		YHR112C	YHR053C
YEL060C		YHR137W	YHR055C
YER035W		YHR138C	YHR071W
YER037W		YHR171W	YHR096C
YER038C		YIL045W	YHR174W
YER053C		YIL097W	YHR179W
YER079W		YIL101C	YIL057C
YER103W		YIL107C	YIL099W
YER119C		YIL113W	YIL154C
YER141W		YIL120W	YIR016W
YER142C		YIL124W	YIR018C-A
YER158C		YIL136W	YIR019C
YFL044C		YIR037W	YJL042W
YGL006W		YIR038C	YJL052W
YGL010W		YIR039C	YJL133C-A
YGL037C		YJL015C	YJL158C
YGL059W		YJL048C	YJL210W
YGL087C		YJL057C	YJR009C
YGL096W		YJL066C	YJR019C
YGL104C		YJL068C	YJR045C
YGL121C		YJL103C	YJR104C
YGL156W		YJL132W	YJR145C
YGL180W		YJL141C	YJR151C
YGL208W		YJL142C	YKL032C
YGL248W		YJL144W	YKL035W
YGR008C		YJL155C	YKL043W
YGR019W		YJL161W	YKL060C
YGR023W		YJL163C	YKL062W
YGR043C		YJL164C	YKL096W-A
YGR127W		YJR008W	YKL109W
YGR149W		YJR025C	YKL151C
YGR194C		YJR059W	YKL152C
YGR201C		YJR066W	YKL182W
YGR209C		YJR096W	YKL201C
YGR237C		YKL026C	YKL217W
YGR248W		YKL065C	YKR042W
YGR256W		YKL067W	YKR093W
YHL021C		YKL091C	YLL019C
YHR087W		YKL093W	YLL024C
YHR097C		YKL100C	YLL026W
YHR104W		YKL103C	YLL028W
YHR112C		YKL121W	YLL039C
YHR137W		YKL124W	YLR056W
YHR138C		YKL133C	YLR109W
YHR171W		YKL142W	YLR110C
YIL045W		YKL150W	YLR121C
YIL097W		YKL188C	YLR141W
YIL101C		YKL193C	YLR162W-A
YIL107C		YKR009C	YLR177W
YIL113W		YKR011C	YLR178C
YIL120W		YKR049C	YLR258W
YIL124W		YKR058W	YLR259C
YIL136W		YKR066C	YLR266C
YIR037W		YKR067W	YLR300W
YIR038C		YKR076W	YLR327C
YIR039C		YLL020C	YLR414C
YJL015C		YLR001C	YLR415C
YJL048C		YLR080W	YML100W
YJL057C		YLR142W	YML128C
YJL066C		YLR149C	YMR015C
YJL068C		YLR152C	YMR016C
YJL103C		YLR250W	YMR043W
YJL132W		YLR251W	YMR070W
YJL141C		YLR252W	YMR081C
YJL142C		YLR267W	YMR103C
YJL144W		YLR270W	YMR105C
YJL155C		YLR290C	YMR122W-A
YJL161W		YLR299W	YMR135C
YJL163C		YLR312C	YMR145C
YJL164C		YLR345W	YMR173W
YJR008W		YLR356W	YMR195W
YJR025C		YLR370C	YMR199W
YJR059W		YML004C	YMR251W-A
YJR066W		YML042W	YMR317W
YJR096W		YML110C	YNL030W
YKL026C		YML131W	YNL031C
YKL065C		YMR041C	YNL036W
YKL067W		YMR053C	YNL077W
YKL091C		YMR090W	YNL078W
YKL093W		YMR110C	YNL178W
YKL100C		YMR136W	YNL241C
YKL103C		YMR139W	YNL289W
YKL121W		YMR155W	YNR016C
YKL124W		YMR169C	YNR034W-A
YKL133C		YMR170C	YOL012C
YKL142W		YMR173W-A	YOL052C-A
YKL150W		YMR174C	YOL059W
YKL188C		YMR181C	YOL081W
YKL193C		YMR196W	YOL084W
YKR009C		YMR197C	YOL086C
YKR011C		YMR250W	YOL109W
YKR049C		YMR251W	YOL155C
YKR058W		YMR253C	YOR028C
YKR066C		YMR271C	YOR032C
YKR067W		YMR291W	YOR049C
YKR076W		YMR297W	YOR107W
YLL020C		YMR302C	YOR136W
YLR001C		YMR304W	YOR153W
YLR080W		YMR315W	YOR178C
YLR142W		YNL009W	YOR246C
YLR149C		YNL015W	YOR273C
YLR152C		YNL055C	YOR298C-A
YLR250W		YNL115C	YOR302W
YLR251W		YNL134C	YOR303W
YLR252W		YNL160W	YOR317W
YLR267W		YNL183C	YOR342C
YLR270W		YNL194C	YOR344C
YLR290C		YNL195C	YOR348C
YLR299W		YNL200C	YOR374W
YLR312C		YNL208W	YOR375C
YLR345W		YNL274C	YPL014W
YLR356W		YNL305C	YPL015C
YLR370C		YNR001C	YPL017C
YML004C		YNR002C	YPL024W
YML042W		YOL048C	YPL026C
YML110C		YOL082W	YPL061W
YML131W		YOL083W	YPL067C
YMR041C		YOL150C	YPL111W
YMR053C		YOL151W	YPL135W
YMR090W		YOL153C	YPL177C
YMR110C		YOR052C	YPL230W
YMR136W		YOR152C	YPL240C
YMR139W		YOR161C	YPL247C
YMR155W		YOR173W	YPL250C
YMR169C		YOR185C	YPL265W
YMR170C		YOR220W	YPR035W
YMR173W-A		YOR285W	YPR036W-A
YMR174C		YOR289W	YPR065W
YMR181C		YPL004C	YPR080W
YMR196W		YPL054W	YPR145W
YMR197C		YPL087W	YPR149W
YMR250W		YPL152W	YPR154W
YMR251W		YPL154C	YPR160W
YMR253C		YPL165C	YPR194C
YMR271C		YPL166W
YMR291W		YPL186C
YMR297W		YPL196W
YMR302C		YPL203W
YMR304W		YPR026W
YMR315W		YPR067W
YNL009W		YPR098C
YNL015W		YPR150W
YNL055C		YPR151C
YNL115C		YPR184W
YNL134C		YCR062W
YNL160W		YDR474C
YNL183C		YJL017W
YNL194C		YJL021C
YNL195C
YNL200C
YNL208W
YNL274C
YNL305C
YNR001C
YNR002C
YOL048C
YOL082W
YOL083W
YOL150C
YOL151W
YOL153C
YOR052C
YOR152C
YOR161C
YOR173W
YOR185C
YOR220W
YOR285W
YOR289W
YPL004C
YPL054W
YPL087W
YPL152W
YPL154C
YPL165C
YPL166W
YPL186C
YPL196W
YPL203W
YPR026W
YPR067W
YPR098C
YPR150W
YPR151C
YPR184W
YCR062W
YDR474C
YJL017W
YJL021C
