# Supplementary material for: Decapping factor Dcp2 controls mRNA abundance and translation to adjust metabolism and filamentation to nutrient availability
Source: eLife journal article supplement (doi:10.7554/elife.85545), 2023-06-02
Supplement: fig8-figsupp3-data1 [file Figure 8 – figure supplement 3 – source data 1.xlsx]

## Sheet: Sheet1
Gene	Name
YBR146W	MRPS9
YOR201C	MRM1
YLR069C	MEF1
YIL070C	MAM33
YIL093C	RSM25
YNR037C	RSM19
YBR251W	MRPS5
YDR462W	MRPL28
YGR165W	MRPS35
YOR354C	MSC6
YNL185C	MRPL19
YBR185C	MBA1
YOL071W	SDH5
YDR494W	RSM28
YGL068W	MNP1
YDL202W	MRPL11
YPL215W	CBP3
YNL252C	MRPL17
YOR020C	HSP10
YDR237W	MRPL7
YKR006C	MRPL13
YHR005C-A	TIM10
YBL059C-A	CMC2
YOR187W	TUF1
YDR337W	MRPS28
YBR120C	CBP6
YGL129C	RSM23
YNL137C	NAM9
YJR101W	RSM26
YDR041W	RSM10
YNL306W	MRPS18
YDR347W	MRP1
YEL020W-A	TIM9
YGR082W	TOM20
YNL315C	ATP11
YJL063C	MRPL8
YCR071C	IMG2
YHR024C	MAS2
YPL118W	MRP51
YDR194C	MSS116
YJL104W	PAM16
YLR259C	HSP60
YJL096W	MRPL49
YPL173W	MRPL40
YBR192W	RIM2
YMR286W	MRPL33
YER182W	FMP10
YJR113C	RSM7
YDR430C	CYM1
YMR158W	MRPS8
YMR225C	MRPL44
YHL004W	MRP4
YER154W	OXA1
YMR188C	MRPS17
YJL062W-A	COA3
YMR193W	MRPL24
YGR084C	MRP13
YNL005C	MRP7
YMR024W	MRPL3
YJR077C	MIR1
YDR116C	MRPL1
YOR286W	RDL2
YJR045C	SSC1
YDR322W	MRPL35
YGR181W	TIM13
YJL066C	MPM1
YPL059W	GRX5
YML025C	YML6
YKL192C	ACP1
YEL050C	RML2
YNL121C	TOM70
YNL284C	MRPL10
YML110C	COQ5
YGR231C	PHB2
YNR040W	YNR040W
YGR132C	PHB1
YNL177C	MRPL22
YMR089C	YTA12
YOR232W	MGE1
YMR203W	TOM40
YGR207C	CIR1
YAL039C	CYC3
YBL030C	PET9
YPL098C	MGR2
YGL040C	HEM2
YDL198C	GGC1
YLR109W	AHP1
YBL022C	PIM1
YOL027C	MDM38
YBL099W	ATP1
YML078W	CPR3
